# Supplementary material for: Muscle-specific Knock-out of NUAK Family SNF1-like Kinase 1 (NUAK1) Prevents High Fat Diet-induced Glucose Intolerance
Source: PubMed Central journal article supplement — J Biol Chem. 2012 Mar 14;287(20):16379–89. doi: 10.1074/jbc.M111.302687 (PMC3351321; doi:10.1074/jbc.m111.302687), 2012-03-14
Supplement: supp_M111.302687_jbc.M111.302687-3.pdf [file supp_M111.302687_jbc.M111.302687-3.pdf]

## Peptide No.1

AASPFRRSPVR

Confirmed sites: @S:7

Ambiguous sites:

MS/MS Fragmentation of **AASPFRRSPVR**

Found in **BAG3\_MOUSE**, BAG family molecular chaperone regulator 3 OS=Mus musculus GN=Bag3  
PE=1 SV=1

Match to Query 1189: 1194.591150 from(399.204326,3+)

Title: Elution from: 27.507 to 27.507 scan no 1962 cid35.00 polarity:+:MA10

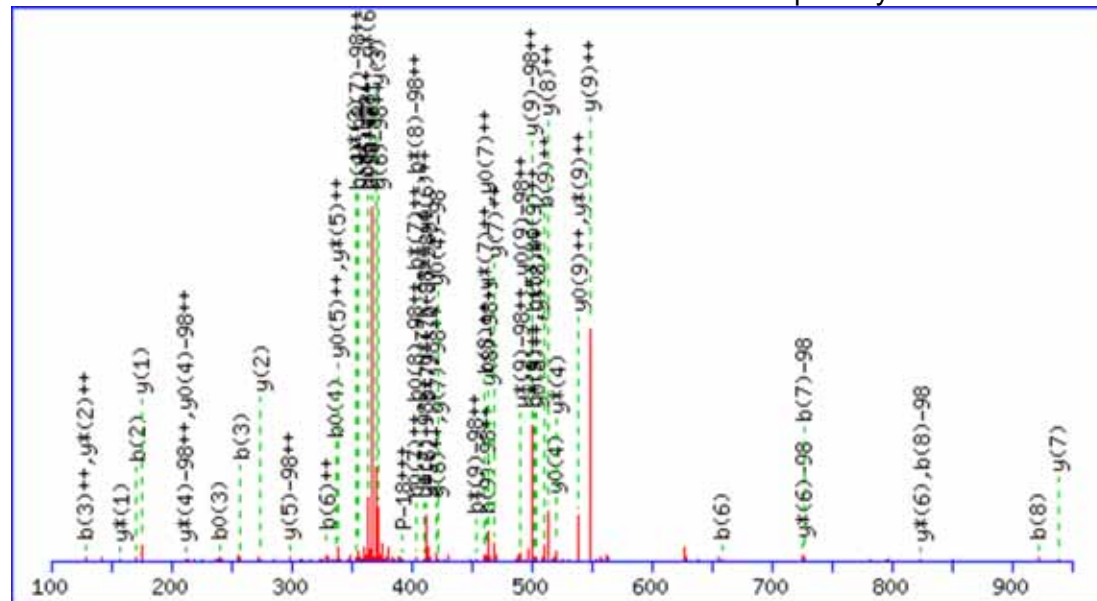

Monoisotopic mass of neutral peptide  $M_r(\text{calc})$ : 1194.5910

Fixed modifications: Carbamidomethyl (C) (apply to specified residues or termini only)

Variable modifications:

N-term : Dimethyl (N-term)

S7 : Phospho (ST), with neutral losses 97.9769(shown in table), 0.0000

Ions Score: 32 Expect: 0.016

Matched b ions: b(2), b(3)++, b(3), b(4), b(5), b(6), b(6)++, b(7)-98, b(7)-98++, b(7)++, b(8), b(8)-98, b(8)-98++, b(8)++, b(9)++, b(9)-98++

Matched y ions: y(1), y(2), y(3), y(5)-98++, y(6)-98++, y(6)++, y(7), y(7)++, y(7)-98++, y(8)++, y(8)-98++, y(9)-98++, y(9)++

Precursor origin neutral loss: +

## Peptide No.2

AASPPASASDLIEQQQK

Confirmed sites: @S:3

Ambiguous sites:

**MS/MS Fragmentation of AASPPASADLIEQQQK**

Found in **FA40A\_MOUSE**, Protein FAM40A OS=Mus musculus GN=Fam40a PE=1 SV=2

Match to Query 4893: 1875.898605 from(626.306811,3+)

Title: Elution from: 42.289 to 42.289 scan no 3964 cid35.00 polarity:+:MA10:m1s

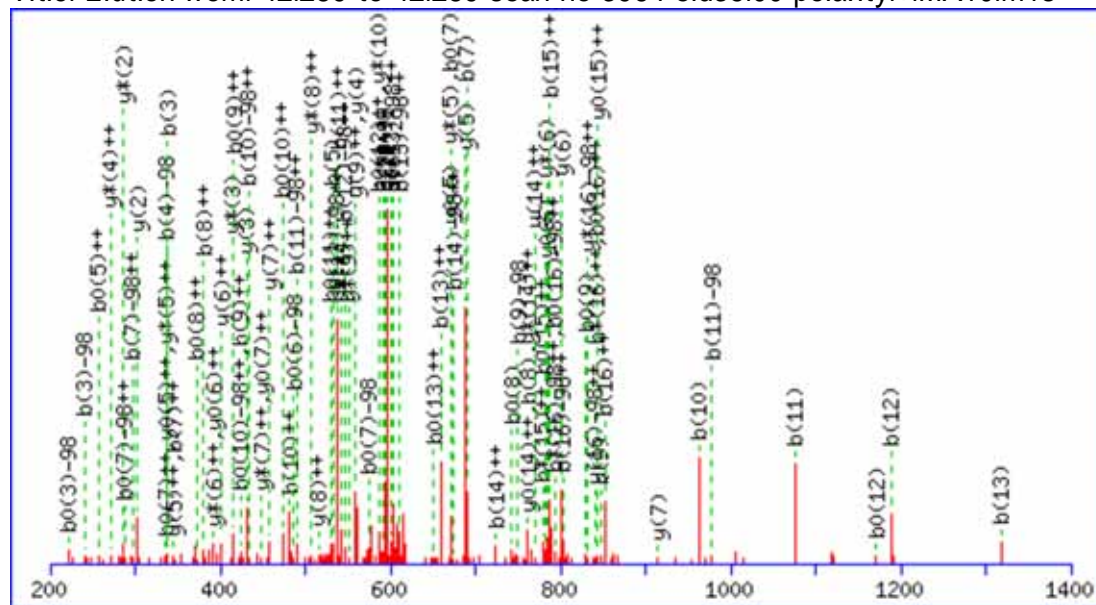

**Monoisotopic mass of neutral peptide Mr(calc): 1875.8979**

**Fixed modifications:** Carbamidomethyl (C) (apply to specified residues or termini only)

**Variable modifications:**

**N-term :** Dimethyl (N-term)

**S3 :** Phospho (ST), with neutral losses 0.0000(shown in table), 97.9769

**K17 :** Dimethyl (K)

**Ions Score: 58 Expect: 0.00012**

**Matched b ions:** b(3), b(3)-98, b(4)-98, b(5), b(6), b(7), b(7)-98++, b(7)++, b(7)-98, b(8), b(8)++, b(9), b(9)++, b(9)-98, b(10), b(10)++, b(10)-98++, b(11), b(11)++, b(11)-98, b(11)-98++, b(12)++, b(12), b(12)-98++, b(13), b(13)++, b(13)-98++, b(14)++, b(14)-98++, b(15)++, b(16)++, b(16)-98++

**Matched y ions:** y(2), y(3), y(4), y(5), y(5)++, y(6), y(6)++, y(7)++, y(7), y(8)++, y(9)++, y(10)++, y(14)++, y(16)-98++

**Precursor origin neutral loss:**

**Peptide No.3**

**AASVELPQR**

**Confirmed sites: @S:3**

**Ambiguous sites:**

**MS/MS Fragmentation of AASVELPQR**

Found in **SPEG\_MOUSE**, Striated muscle-specific serine/threonine-protein kinase OS=Mus musculus GN=Spep PE=1 SV=2

Match to Query 511: 1077.523190 from(539.768871,2+)

Title: Elution from: 32.193 to 32.193 scan no 2395 cid35.00 polarity:+:MA10



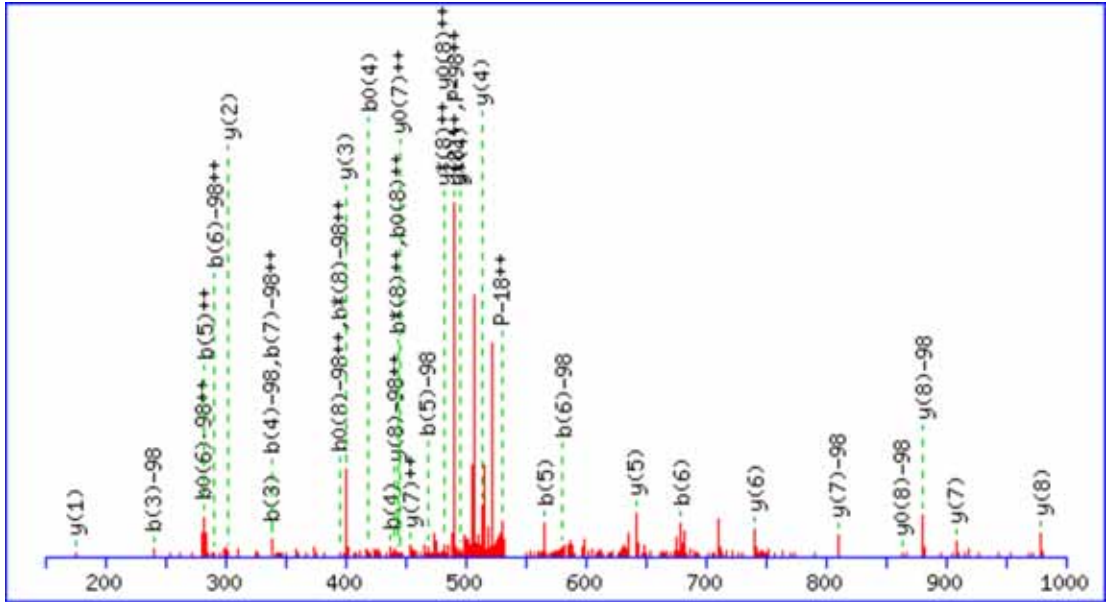

**Monoisotopic mass of neutral peptide Mr(calc): 1077.5219**

**Fixed modifications:** Carbamidomethyl (C) (apply to specified residues or termini only)

**Variable modifications:**

**N-term :** Dimethyl (N-term)

**S3 :** Phospho (ST), with neutral losses 97.9769(shown in table), 0.0000

**Ions Score:** 31 **Expect:** 0.018

**Matched b ions:** b(3)-98, b(3), b(4)-98, b(4), b(5)++, b(5)-98, b(5), b(6), b(6)-98, b(7)-98, b(8)-98, b(8)

**Matched y ions:** y(1), y(2), y(3), y(4), y(5), y(6), y(7)-98, y(7), y(7)++, y(8)++, y(8)-98, y(8), y(8)-98

**Precursor origin neutral loss:** +

## Peptide No.4

**AASVELPQR**

**Confirmed sites:** @S:3

**Ambiguous sites:**

**MS/MS Fragmentation of AASVELPQR**

Found in **SPEG\_MOUSE**, Striated muscle-specific serine/threonine-protein kinase OS=Mus musculus

GN=Speg PE=1 SV=2

Match to Query 598: 1083.554478 from(542.784515,2+)

Title: Elution from: 32.102 to 32.102 scan no 2389 cid35.00 polarity:+:MA10

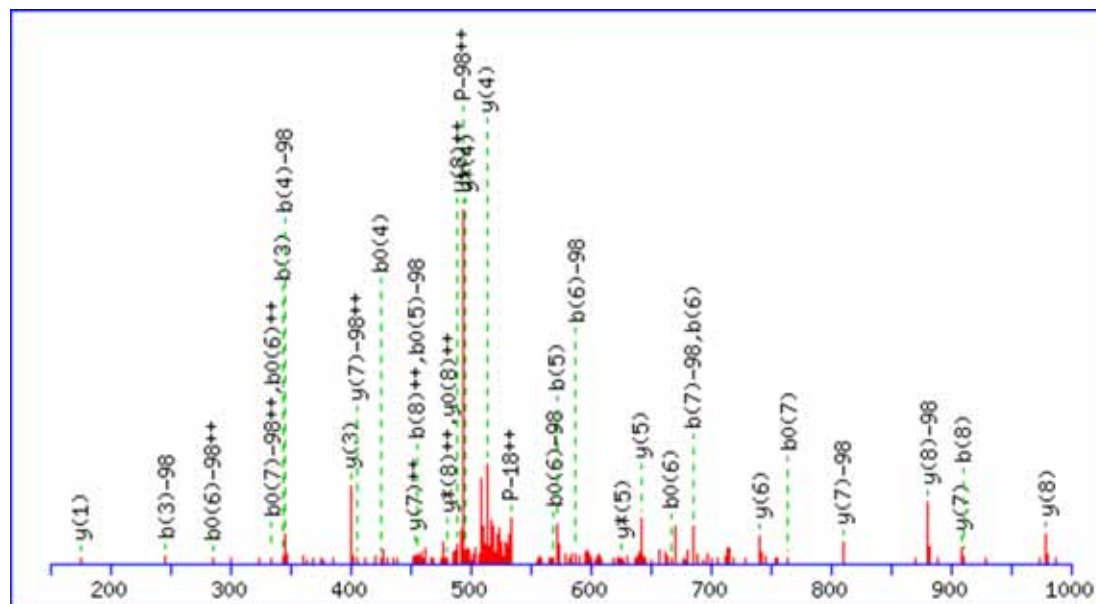

**Monoisotopic mass of neutral peptide Mr(calc):** 1083.5538

**Fixed modifications:** Carbamidomethyl (C) (apply to specified residues or termini only)

**Variable modifications:**

**N-term :** Dimethyl:2H(4)13C(2) (N-term)

**S3 :** Phospho (ST), with neutral losses 97.9769(shown in table), 0.0000

**Ions Score:** 50 **Expect:** 0.0002

**Matched b ions:** b(3)-98, b(3), b(4)-98, b(5), b(6), b(6)-98, b(7)-98, b(8), b(8)++

**Matched y ions:** y(1), y(3), y(4), y(5), y(6), y(7)-98, y(7), y(7)-98++, y(7)++, y(8)-98, y(8), y(8)++

**Precursor origin neutral loss:** +

## Peptide No.5

**ADSPPAVIR**

**Confirmed sites:** @S:3

**Ambiguous sites:**

MS/MS Fragmentation of **ADSPPAVIR**

Found in **NACAM\_MOUSE**, Nascent polypeptide-associated complex subunit alpha, muscle-specific form OS=Mus musculus GN=Naca PE=1 SV=1

Match to Query 561: 1032.500770 from(517.257661,2+)

Title: Elution from: 31.598 to 31.598 scan no 2525 cid35.00 polarity:+:MA10

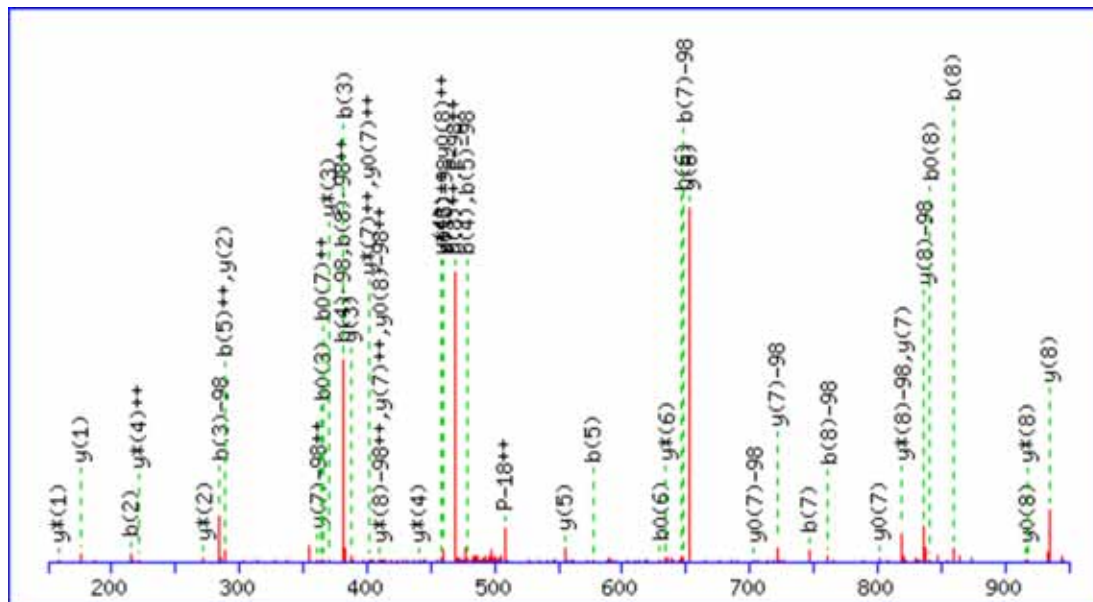

**Monoisotopic mass of neutral peptide Mr(calc):** 1032.5005

**Fixed modifications:** Carbamidomethyl (C) (apply to specified residues or termini only)

**Variable modifications:**

**N-term :** Dimethyl (N-term)

**S3 :** Phospho (ST), with neutral losses 97.9769(shown in table), 0.0000

**Ions Score:** 61 **Expect:** 2.1e-005

**Matched b ions:** b(2), b(3)-98, b(3), b(4)-98, b(4), b(5)++, b(5)-98, b(5), b(6), b(7), b(7)-98, b(8), b(8)-98++, b(8)-98

**Matched y ions:** y(1), y(2), y(3), y(4), y(5), y(6), y(7)-98, y(7), y(7)++, y(7)-98++, y(8)++, y(8)-98, y(8)

**Precursor origin neutral loss:** +

## Peptide No.6

**ADSPPAVIR**

**Confirmed sites:** @S:3

**Ambiguous sites:**

MS/MS Fragmentation of **ADSPPAVIR**

Found in **NACAM\_MOUSE**, Nascent polypeptide-associated complex subunit alpha, muscle-specific form OS=Mus musculus GN=Naca PE=1 SV=1

Match to Query 392: 1038.532808 from(520.273680,2+)

Title: Elution from: 31.903 to 31.903 scan no 2258 cid35.00 polarity:+:MA10

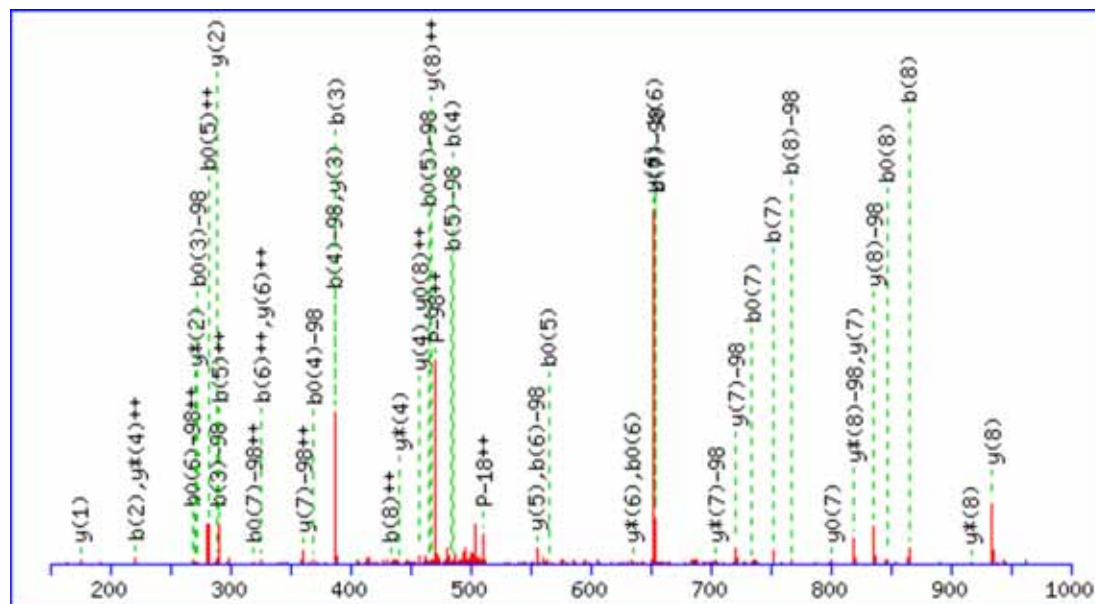

**Monoisotopic mass of neutral peptide Mr(calc):** 1038.5323

**Fixed modifications:** Carbamidomethyl (C) (apply to specified residues or termini only)

**Variable modifications:**

**N-term :** Dimethyl:2H(4)13C(2) (N-term)

**S3 :** Phospho (ST), with neutral losses 97.9769(shown in table), 0.0000

**Ions Score:** 43 **Expect:** 0.0014

**Matched b ions:** b(2), b(3)-98, b(3), b(4)-98, b(4), b(5)++, b(5)-98, b(6), b(6)-98, b(6)++, b(7), b(7)-98, b(8), b(8)-98, b(8)++

**Matched y ions:** y(1), y(2), y(3), y(4), y(5), y(6), y(6)++, y(7)-98, y(7), y(7)-98++, y(8)-98, y(8), y(8)++

**Precursor origin neutral loss:** +

## Peptide No.7

**ADSVPNLEPSEESLVTK**

**Confirmed sites:** @S:3

**Ambiguous sites:**

MS/MS Fragmentation of **ADSVPNLEPSEESLVTK**

Found in **LNP\_MOUSE**, Protein lunapark OS=Mus musculus GN=Lnp PE=1 SV=1

Match to Query 6269: 1949.925358 from(975.969955,2+)

Title: Elution from: 49.821 to 49.821 scan no 4936 cid35.00 polarity:+:MA10:m1s



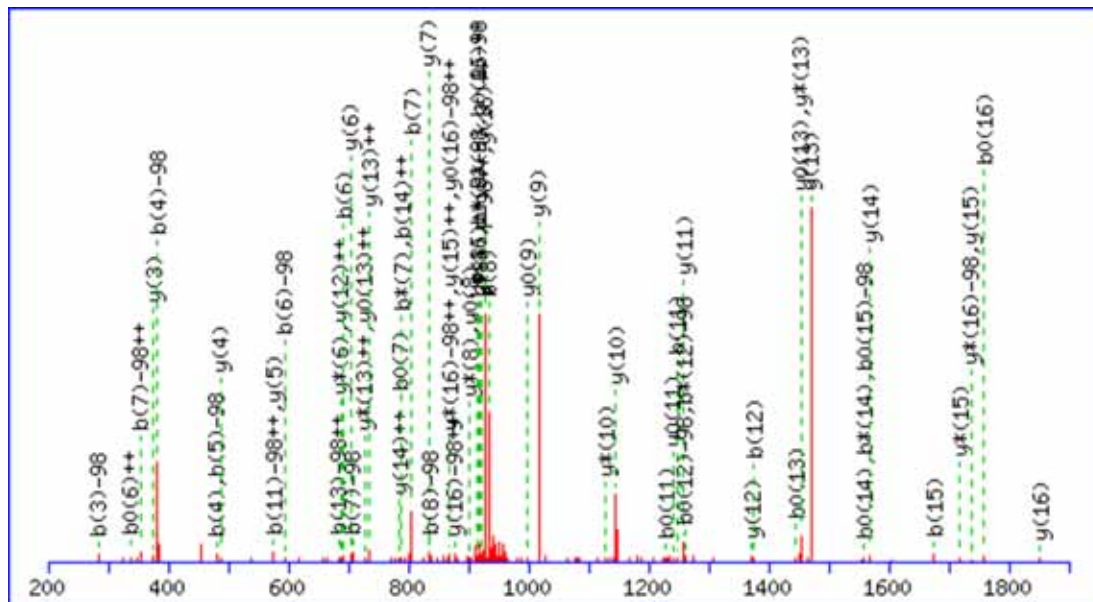

**Monoisotopic mass of neutral peptide Mr(calc):** 1949.9234

**Fixed modifications:** Carbamidomethyl (C) (apply to specified residues or termini only)

**Variable modifications:**

**N-term :** Dimethyl (N-term)

**S3 :** Phospho (ST), with neutral losses 0.0000(shown in table), 97.9769

**K17 :** Dimethyl (K)

**Ions Score:** 69 **Expect:** 8.3e-006

**Matched b ions:** b(3)-98, b(4)-98, b(4), b(5)-98, b(6)-98, b(6), b(7), b(7)-98, b(7)-98++, b(8)-98, b(8), b(11)-98++, b(11), b(12), b(13)-98++, b(14)++ , b(15)

**Matched y ions:** y(3), y(4), y(5), y(6), y(7), y(8), y(9), y(10), y(11), y(12), y(12)++ , y(13)++ , y(13), y(14), y(14)++ , y(15), y(15)++ , y(16)++ , y(16), y(16)-98++

**Precursor origin neutral loss:** +

## Peptide No.8

**ADSVPNLEPSEESLVTK**

**Confirmed sites:** @S:3

**Ambiguous sites:**

MS/MS Fragmentation of **ADSVPNLEPSEESLVTK**

Found in **LNP\_MOUSE**, Protein lunapark OS=Mus musculus GN=Lnp PE=1 SV=1

Match to Query 4843: 1961.988840 from(982.001696,2+)

Title: Elution from: 49.896 to 49.896 scan no 4716 cid35.00 polarity:+:MA10:m1s

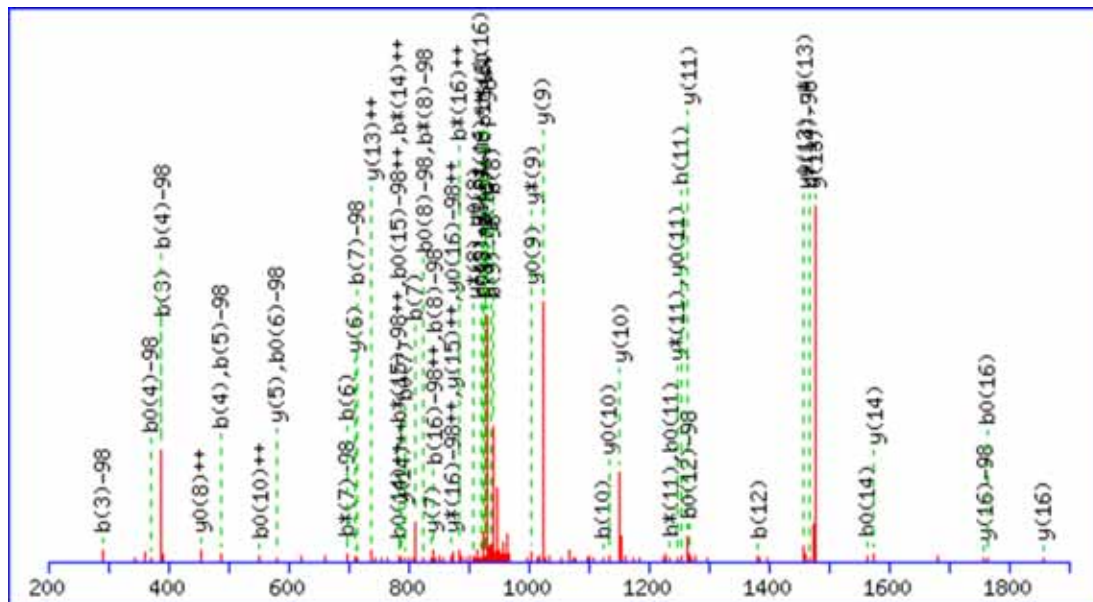

**Monoisotopic mass of neutral peptide Mr(calc):** 1961.9871

**Fixed modifications:** Carbamidomethyl (C) (apply to specified residues or termini only)

**Variable modifications:**

**N-term :** Dimethyl:2H(4)13C(2) (N-term)

**S3 :** Phospho (ST), with neutral losses 97.9769(shown in table), 0.0000

**K17 :** Dimethyl:2H(4)13C(2) (K)

**Ions Score:** 38 **Expect:** 0.0094

**Matched b ions:** b(3), b(3)-98, b(4)-98, b(4), b(5)-98, b(6), b(7), b(7)-98, b(8)-98, b(8), b(9)-98, b(10), b(11), b(12), b(16)-98++

**Matched y ions:** y(5), y(6), y(7), y(8), y(9), y(10), y(11), y(13)++, y(13), y(14), y(14)++, y(15)++, y(16), y(16)-98, y(16)++

**Precursor origin neutral loss:** +

## Peptide No.9

**ADVQLFMADDAYSHHSGVDYADPEK**

**Confirmed sites:** @Y:12,@S:13

**Ambiguous sites:**

MS/MS Fragmentation of **ADVQLFMADDAYSHHSGVDYADPEK**

Found in **CAV2\_MOUSE**, Caveolin-2 OS=Mus musculus GN=Cav2 PE=1 SV=1

Match to Query 8585: 3012.193872 from(1005.071900,3+)

Title: Elution from: 50.669 to 50.669 scan no 4990 cid35.00 polarity:+:MA10:m1s

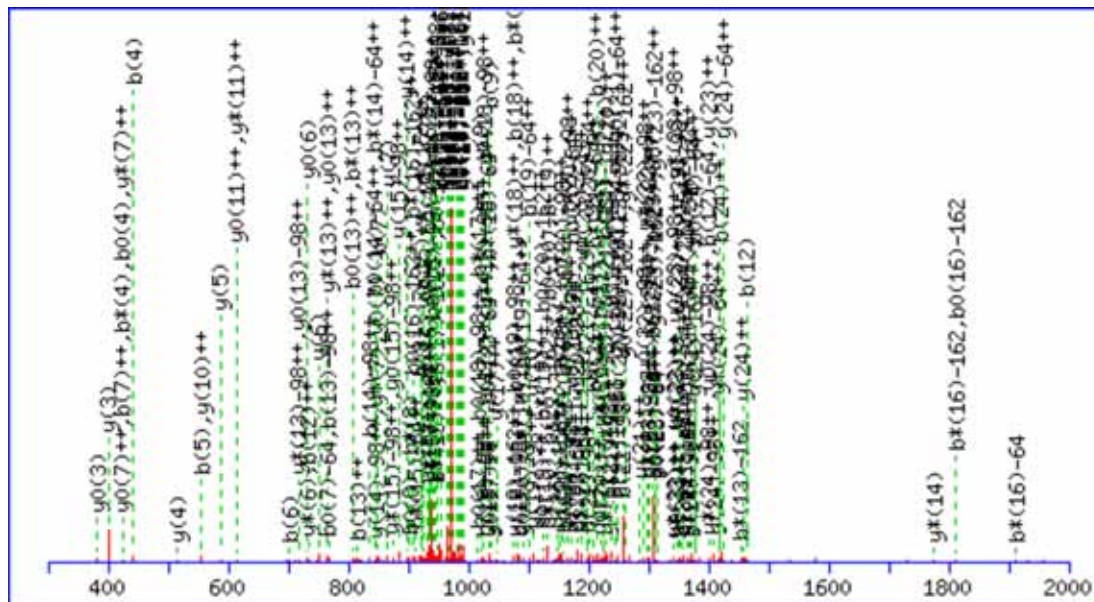

**Monoisotopic mass of neutral peptide Mr(calc):** 3012.1926

**Fixed modifications:** Carbamidomethyl (C) (apply to specified residues or termini only)

**Variable modifications:**

**N-term :** Dimethyl (N-term)

**M7 :** Oxidation (M), with neutral losses 0.0000(shown in table), 63.9983

**Y12 :** Phospho (Y)

**S13 :** Phospho (ST), with neutral losses 97.9769(shown in table), 0.0000

**K25 :** Dimethyl (K)

**Ions Score:** 68 **Expect:** 7.3e-006

**Matched b ions:** b(4), b(5), b(6), b(7), b(7)++, b(8), b(9), b(10), b(11), b(12)++, b(12), b(13)-98++, b(13)++, b(14)-98++, b(15)++, b(16)-98++, b(17)++, b(17)-98++, b(18)++, b(18)-98++, b(19)++, b(19)-98++, b(20)++, b(20)-98++, b(21)-98++, b(21)++, b(22)-98++, b(22)++, b(23)-98++, b(23)++, b(24)-98++, b(24)++

**Matched y ions:** y(3), y(4), y(5), y(6), y(7), y(8), y(9), y(10)++, y(10), y(11), y(14)-98++, y(14)++, y(15)++, y(15)-98++, y(16)++, y(16)-98++, y(17)++, y(18)-98++, y(18)++, y(19)-98++, y(19)++, y(20)-98++, y(20)++, y(21)-98++, y(21)++, y(22)-98++, y(22)++, y(23)++, y(23)-98++, y(24)-98++, y(24)++

**Precursor origin neutral loss:** +

## Peptide No.10

**ADVQLFMADDAYSHHSGVDYADPEK**

**Confirmed sites:** @Y:12,@S:13

**Ambiguous sites:**

MS/MS Fragmentation of **ADVQLFMADDAYSHHSGVDYADPEK**

Found in **CAV2\_MOUSE**, Caveolin-2 OS=Mus musculus GN=Cav2 PE=1 SV=1

Match to Query 6681: 3024.256263 from(1009.092697,3+)

Title: Elution from: 50.439 to 50.439 scan no 4592 cid35.00 polarity:+:MA10:m1s

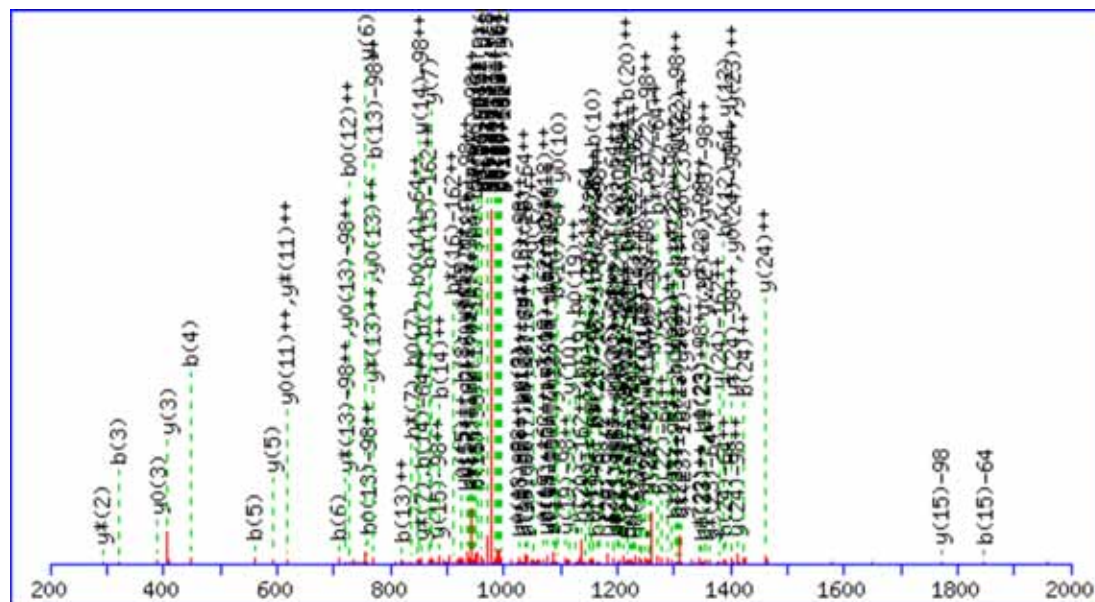

**Monoisotopic mass of neutral peptide Mr(calc):** 3024.2562

**Fixed modifications:** Carbamidomethyl (C) (apply to specified residues or termini only)

**Variable modifications:**

**N-term :** Dimethyl:2H(4)13C(2) (N-term)

**M7 :** Oxidation (M), with neutral losses 0.0000(shown in table), 63.9983

**Y12 :** Phospho (Y)

**S13 :** Phospho (ST), with neutral losses 97.9769(shown in table), 0.0000

**K25 :** Dimethyl:2H(4)13C(2) (K)

**Ions Score:** 60 **Expect:** 5.7e-005

**Matched b ions:** b(3), b(4), b(5), b(6), b(7), b(8), b(9), b(10), b(11), b(13)-98++, b(13)++, b(14)++, b(16)-98++, b(17)++, b(17)-98++, b(18)++, b(18)-98++, b(19)-98++, b(19)++, b(20)-98++, b(20)++, b(21)++, b(21)-98++, b(22)-98++, b(22)++, b(23)-98++, b(24)++

**Matched y ions:** y(3), y(5), y(6), y(7), y(8), y(9), y(10), y(11), y(12), y(14)-98++, y(15)-98++, y(15)-98, y(15)++, y(16)-98++, y(16)++, y(17)++, y(18)++, y(18)-98++, y(19)-98++, y(19)++, y(20)-98++, y(20)++, y(21)++, y(21)-98++, y(22)++, y(22)-98++, y(23)-98++, y(23)++, y(24)-98++, y(24)++

**Precursor origin neutral loss:** +

## Peptide No.11

**ADVQLFMADDAYSHHSGVDYADPEK**

**Confirmed sites:** @S:16

**Ambiguous sites:** @Y:12orS:13

MS/MS Fragmentation of **ADVQLFMADDAYSHHSGVDYADPEK**

Found in **CAV2\_MOUSE**, Caveolin-2 OS=Mus musculus GN=Cav2 PE=1 SV=1

Match to Query 7237: 3024.260232 from(1009.094020,3+)

Title: Elution from: 50.538 to 50.538 scan no 4735 cid35.00 polarity:+:MA10:m1s



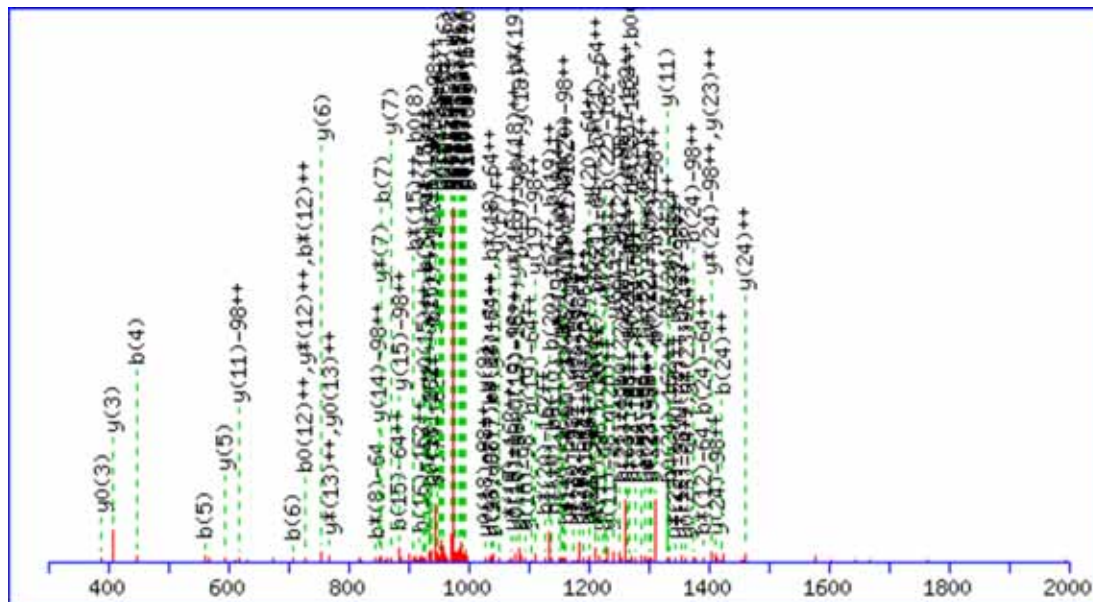

**Monoisotopic mass of neutral peptide Mr(calc):** 3024.2562

**Fixed modifications:** Carbamidomethyl (C) (apply to specified residues or termini only)

**Variable modifications:**

**N-term :** Dimethyl:2H(4)13C(2) (N-term)

**M7 :** Oxidation (M), with neutral losses 0.0000(shown in table), 63.9983

**Y12 :** Phospho (Y)

**S16 :** Phospho (ST), with neutral losses 97.9769(shown in table), 0.0000

**K25 :** Dimethyl:2H(4)13C(2) (K)

**Ions Score:** 45 **Expect:** 0.0022

**Matched b ions:** b(4), b(5), b(6), b(7), b(8), b(9), b(10), b(16)-98++, b(17)-98++, b(18)++, b(19)-98++, b(19)++, b(20)++, b(21)++, b(21)-98++, b(22)-98++, b(22)++, b(23)-98++, b(24)-98++, b(24)++

**Matched y ions:** y(3), y(5), y(6), y(7), y(8), y(9), y(10)-98, y(11)-98++, y(11)-98, y(11), y(14)-98++, y(15)-98++, y(15)++, y(16)-98++, y(16)++, y(17)++, y(18)++, y(18)-98++, y(19)-98++, y(19)++, y(20)-98++, y(20)++, y(21)++, y(21)-98++, y(22)++, y(22)-98++, y(23)++, y(23)-98++, y(24)-98++, y(24)++

**Precursor origin neutral loss:** +

## Peptide No.12

**AEAKEESEESDEDMGFGLFD**

**Confirmed sites:** @S:10

**Ambiguous sites:**

MS/MS Fragmentation of **AEAKEESEESDEDMGFGLFD**

Found in **RLA0\_MOUSE**, 60S acidic ribosomal protein P0 OS=Mus musculus GN=Rplp0 PE=1 SV=3

Match to Query 7265: 2385.910824 from(1193.962688,2+)

Title: Elution from: 58.578 to 58.578 scan no 5806 cid35.00 polarity:+:MA10:m1s

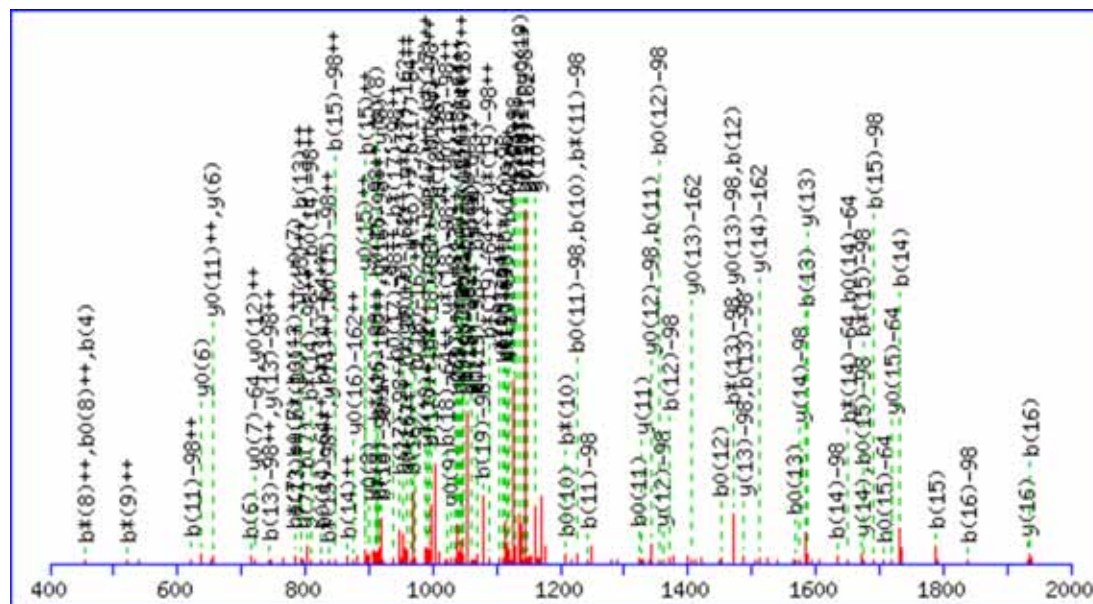

**Monoisotopic mass of neutral peptide Mr(calc): 2385.9083**

**Fixed modifications:** Carbamidomethyl (C) (apply to specified residues or termini only)

**Variable modifications:**

**N-term :** Dimethyl (N-term)

**K4 :** Dimethyl (K)

**S10 :** Phospho (ST), with neutral losses 0.0000(shown in table), 97.9769

**M14 :** Oxidation (M), with neutral losses 0.0000(shown in table), 63.9983

**Ions Score: 47 Expect: 0.00055**

**Matched b ions:** b(4), b(6), b(7), b(9), b(10), b(10)-98, b(11), b(11)-98++, b(11)-98, b(12), b(12)-98, b(13), b(13)-98, b(13)-98++, b(13)++, b(14), b(14)-98, b(14)++, b(15), b(15)-98, b(15)++, b(15)-98++, b(16)-98++, b(16), b(16)-98, b(16)++, b(17)-98++, b(17)++, b(18)++, b(18)-98++, b(19)++, b(19)-98++  
**Matched y ions:** y(6), y(7), y(8), y(9), y(10), y(11), y(12)-98, y(13)-98, y(13), y(13)-98++, y(13)++, y(14), y(14)++, y(14)-98, y(16)-98++, y(16), y(16)++, y(17)++, y(17)-98++, y(19)++

**Precursor origin neutral loss:** +

---

## Peptide No.13

**AEAKEESEESDEDMGFGLFD**

**Confirmed sites: @S:7,@S:10**

**Ambiguous sites:**

MS/MS Fragmentation of **AEAKEESEESDEDMGFGLFD**

Found in **RLA0\_MOUSE**, 60S acidic ribosomal protein P0 OS=Mus musculus GN=Rplp0 PE=1 SV=3

Match to Query 7426: 2465.874656 from(1233.944604,2+)

Title: Elution from: 65.275 to 65.275 scan no 6363 cid35.00 polarity:+:MA10:m1s

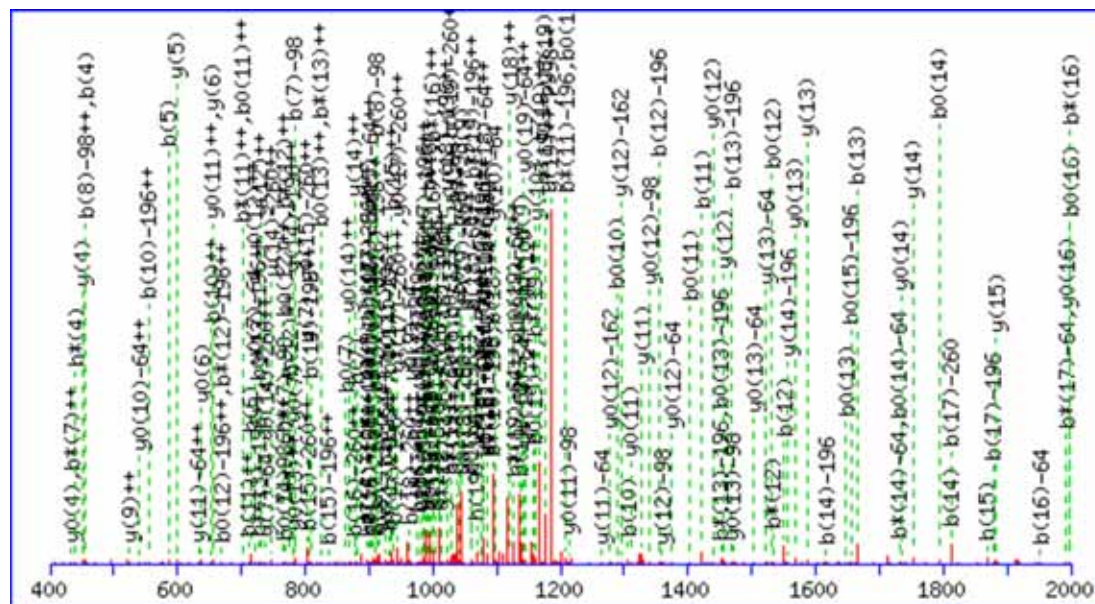

**Monoisotopic mass of neutral peptide Mr(calc):** 2465.8746

**Fixed modifications:** Carbamidomethyl (C) (apply to specified residues or termini only)

**Variable modifications:**

**N-term :** Dimethyl (N-term)

**K4 :** Dimethyl (K)

**S7 :** Phospho (ST), with neutral losses 0.0000(shown in table), 97.9769

**S10 :** Phospho (ST), with neutral losses 0.0000(shown in table), 97.9769

**M14 :** Oxidation (M), with neutral losses 0.0000(shown in table), 63.9983

**Ions Score:** 60 **Expect:** 1.7e-005

**Matched b ions:** b(4), b(5), b(6), b(7)-98, b(7), b(8)-98++, b(8)-98, b(8), b(9), b(9)-98, b(10), b(10)++, b(10)-196++, b(10)-98, b(11)-98, b(11), b(11)++, b(12), b(12)-98, b(12)-196, b(12)-98++, b(12)++, b(13), b(13)-98, b(13)-98++, b(13)-196, b(14)-98, b(14), b(14)++, b(14)-196, b(14)-98++, b(14)-196++, b(15)-98++, b(15), b(15)-98, b(15)++, b(15)-196++, b(16)++, b(16)-98, b(16)-98++, b(16)-196++, b(17)-98++, b(17)++, b(17)-196, b(17)-196++, b(18)++, b(18)-98++, b(18)-196++, b(19)++, b(19)-98++, b(19)-196++

**Matched y ions:** y(4), y(5), y(6), y(7), y(8), y(9)++, y(9), y(10), y(11), y(12), y(12)-98, y(12)++, y(13), y(14), y(14)-196++, y(14)++, y(14)-98, y(14)-196, y(15), y(16)-98, y(17)++, y(17)-98++, y(17)-196++, y(18)-196++, y(18)-98++, y(18)++, y(19)++, y(19)-98++

**Precursor origin neutral loss:** +

## Peptide No.14

**AEAKEESEESDEDMGFGLFD**

**Confirmed sites:** @S:7,@S:10

**Ambiguous sites:**

MS/MS Fragmentation of **AEAKEESEESDEDMGFGLFD**

Found in **RLA0\_MOUSE**, 60S acidic ribosomal protein P0 OS=Mus musculus GN=Rplp0 PE=1 SV=3

Match to Query 6377: 2449.883667 from(817.635165,3+)

Title: Elution from: 72.702 to 72.702 scan no 6718 cid35.00 polarity:+:MA10:m1s

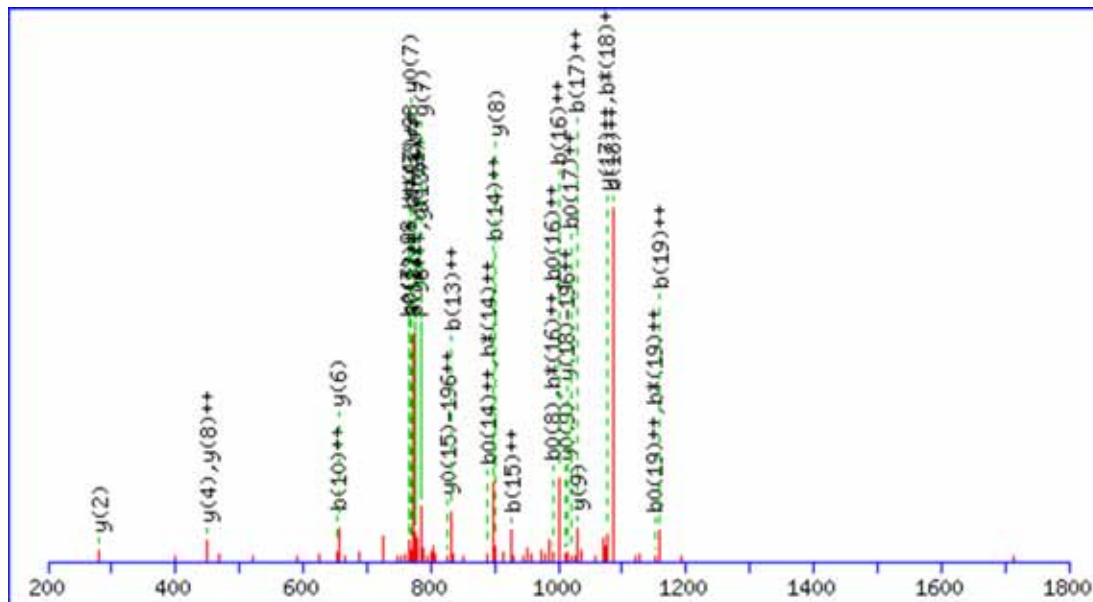

**Monoisotopic mass of neutral peptide Mr(calc):** 2449.8797

**Fixed modifications:** Carbamidomethyl (C) (apply to specified residues or termini only)

**Variable modifications:**

**N-term :** Dimethyl (N-term)

**K4 :** Dimethyl (K)

**S7 :** Phospho (ST), with neutral losses 0.0000(shown in table), 97.9769

**S10 :** Phospho (ST), with neutral losses 0.0000(shown in table), 97.9769

**Ions Score:** 63 **Expect:** 8.1e-006

**Matched b ions:** b(10)++, b(12)++, b(13)-98++, b(13)++, b(14)++, b(15)++, b(16)++, b(16)-98++, b(17)++, b(17)-98++, b(18)++, b(18)-98++, b(19)++

**Matched y ions:** y(2), y(4), y(6), y(7), y(8)++, y(8), y(9), y(13)++, y(17)++, y(18)-196++

**Precursor origin neutral loss:** +

## Peptide No.15

**AEAKEESEESDEDMGFGLFD**

**Confirmed sites:** @S:7,@S:10

**Ambiguous sites:**

MS/MS Fragmentation of **AEAKEESEESDEDMGFGLFD**

Found in **RLA0\_MOUSE**, 60S acidic ribosomal protein P0 OS=Mus musculus GN=Rplp0 PE=1 SV=3

Match to Query 5864: 2477.938486 from(1239.976519,2+)

Title: Elution from: 65.062 to 65.062 scan no 5804 cid35.00 polarity:+:MA10:m1s



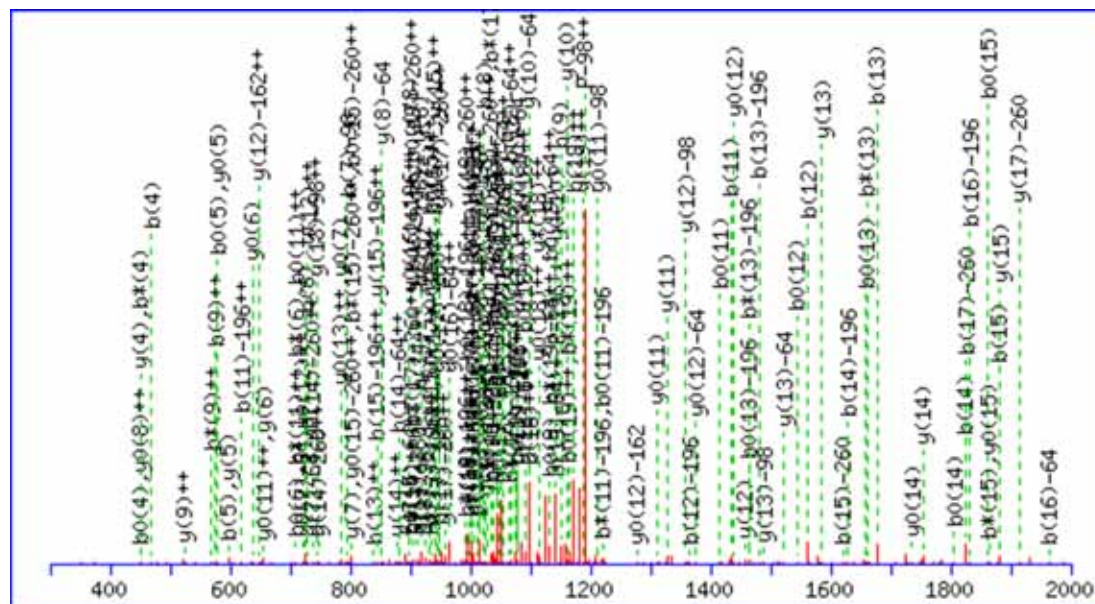

**Monoisotopic mass of neutral peptide Mr(calc):** 2477.9383

**Fixed modifications:** Carbamidomethyl (C) (apply to specified residues or termini only)

**Variable modifications:**

**N-term :** Dimethyl:2H(4)13C(2) (N-term)

**K4 :** Dimethyl:2H(4)13C(2) (K)

**S7 :** Phospho (ST), with neutral losses 0.0000(shown in table), 97.9769

**S10 :** Phospho (ST), with neutral losses 0.0000(shown in table), 97.9769

**M14 :** Oxidation (M), with neutral losses 0.0000(shown in table), 63.9983

**Ions Score:** 61 **Expect:** 2.1e-005

**Matched b ions:** b(4), b(5), b(6), b(7)-98, b(8)-98, b(8), b(9), b(9)++, b(9)-98, b(10)-98, b(11)-98, b(11), b(11)-196++, b(12)-98, b(12), b(12)-196, b(13), b(13)-98, b(13)++, b(13)-196, b(13)-98++, b(14), b(14)-98, b(14)-98++, b(14)-196, b(14)++, b(15), b(15)-98++, b(15)-98, b(15)++, b(15)-196++, b(16)-196++, b(16)-98, b(16)++, b(16)-98++, b(16)-196, b(17)++, b(17)-98, b(17)-98++, b(17)-196++, b(18)-98++, b(18)++, b(18)-196++, b(19)++, b(19)-98++, b(19)-196++

**Matched y ions:** y(4), y(5), y(6), y(7), y(8), y(9)++, y(9), y(10), y(11), y(12), y(12)-98, y(12)++, y(13)-98, y(13)-98++, y(13), y(14), y(14)-98, y(14)++, y(15)-98++, y(15), y(15)++, y(15)-196++, y(16)-98, y(16)++, y(16)-98++, y(18)-196++, y(18)-98++, y(19)++

**Precursor origin neutral loss:** +

## Peptide No.16

**AEAKEESEESDEDMGFGLFD**

**Confirmed sites:** @S:7,@S:10

**Ambiguous sites:**

MS/MS Fragmentation of **AEAKEESEESDEDMGFGLFD**

Found in **RLA0\_MOUSE**, 60S acidic ribosomal protein P0 OS=Mus musculus GN=Rplp0 PE=1 SV=3

Match to Query 5889: 2461.947447 from(821.656425,3+)

Title: Elution from: 72.182 to 72.182 scan no 6558 cid35.00 polarity:+:MA10:m1s

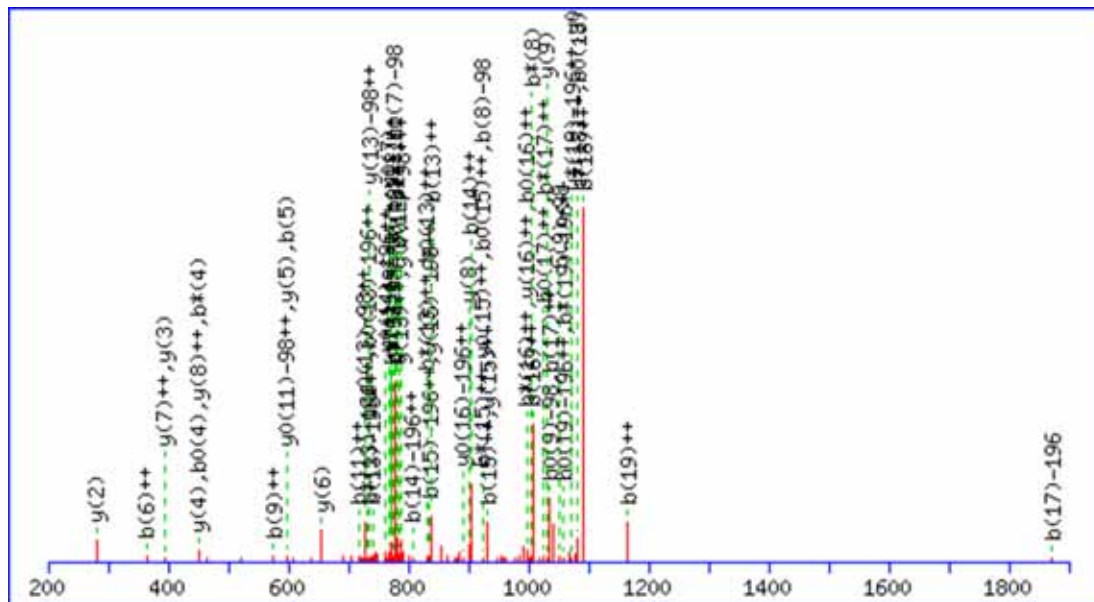

**Monoisotopic mass of neutral peptide Mr(calc):** 2461.9433

**Fixed modifications:** Carbamidomethyl (C) (apply to specified residues or termini only)

**Variable modifications:**

**N-term :** Dimethyl:2H(4)13C(2) (N-term)

**K4 :** Dimethyl:2H(4)13C(2) (K)

**S7 :** Phospho (ST), with neutral losses 0.0000(shown in table), 97.9769

**S10 :** Phospho (ST), with neutral losses 0.0000(shown in table), 97.9769

**Ions Score:** 69 **Expect:** 4.3e-006

**Matched b ions:** b(5), b(6)++, b(8)-98, b(9)++, b(9)-98, b(11)++, b(12)++, b(12)-98++, b(13)++, b(13)-98++, b(13)-196++, b(14)++, b(14)-98++, b(14)-196++, b(15)++, b(15)-98++, b(15)-196++, b(16)++, b(16)-98++, b(17)-196, b(17)++, b(17)-98++, b(18)++, b(18)-98++, b(19)++

**Matched y ions:** y(2), y(3), y(4), y(5), y(6), y(7)++, y(7), y(8)++, y(8), y(9), y(13)++, y(13)-98++, y(14)-196++, y(15)++, y(15)-98++, y(15)-196++, y(16)++, y(17)-98++

**Precursor origin neutral loss:**

## Peptide No.17

**AEDTTMPIR**

**Confirmed sites:** @T:4

**Ambiguous sites:**

**MS/MS Fragmentation of AEDTTMPIR**

Found in **HP1B3\_MOUSE**, Heterochromatin protein 1-binding protein 3 OS=Mus musculus GN=Hp1bp3 PE=1 SV=1

Match to Query 946: 1162.516550 from(582.265551,2+)

Title: Elution from: 44.296 to 44.296 scan no 4054 cid35.00 polarity:+:MA10

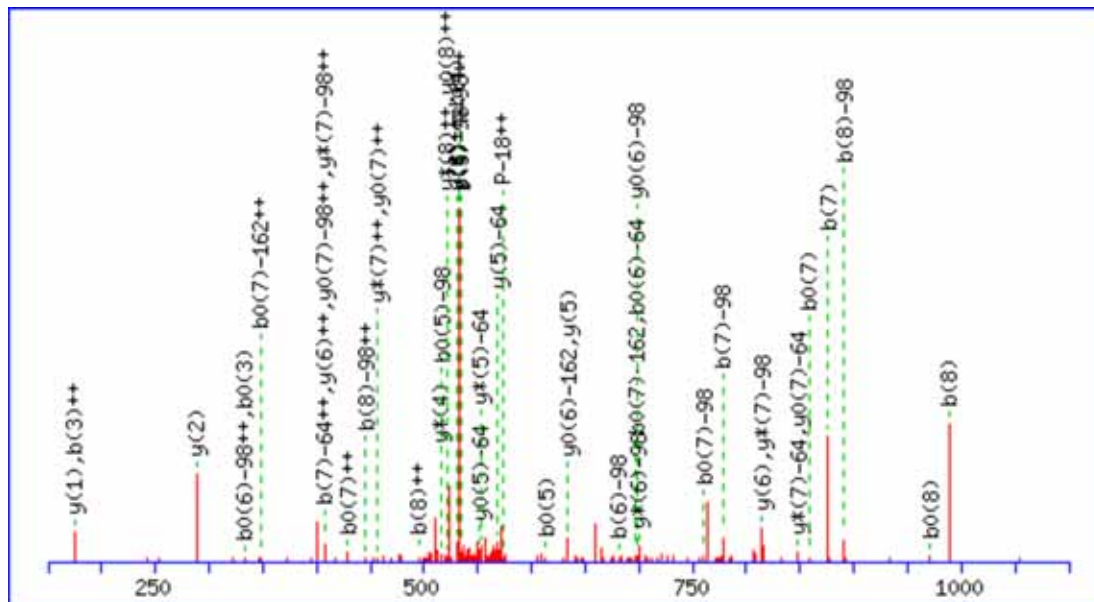

**Monoisotopic mass of neutral peptide Mr(calc):** 1162.5153

**Fixed modifications:** Carbamidomethyl (C) (apply to specified residues or termini only)

**Variable modifications:**

**N-term :** Dimethyl:2H(4)13C(2) (N-term)

**T4 :** Phospho (ST), with neutral losses 0.0000(shown in table), 97.9769

**M6 :** Oxidation (M), with neutral losses 0.0000(shown in table), 63.9983

**Ions Score:** 27 **Expect:** 0.046

**Matched b ions:** b(3)++, b(4), b(5)-98, b(6)-98, b(7), b(7)-98, b(8), b(8)-98, b(8)-98++, b(8)++

**Matched y ions:** y(1), y(2), y(4), y(5), y(6), y(6)++, y(8)++

**Precursor origin neutral loss:** +

## Peptide No.18

**AEDEILNRSPR**

**Confirmed sites:** @S:10

**Ambiguous sites:**

MS/MS Fragmentation of **AEDEILNRSPR**

Found in **CALX\_MOUSE**, Calnexin OS=Mus musculus GN=Canx PE=1 SV=1

Match to Query 2048: 1535.698294 from(768.856423,2+)

Title: Elution from: 31.462 to 31.462 scan no 2302 cid35.00 polarity:+:MA10

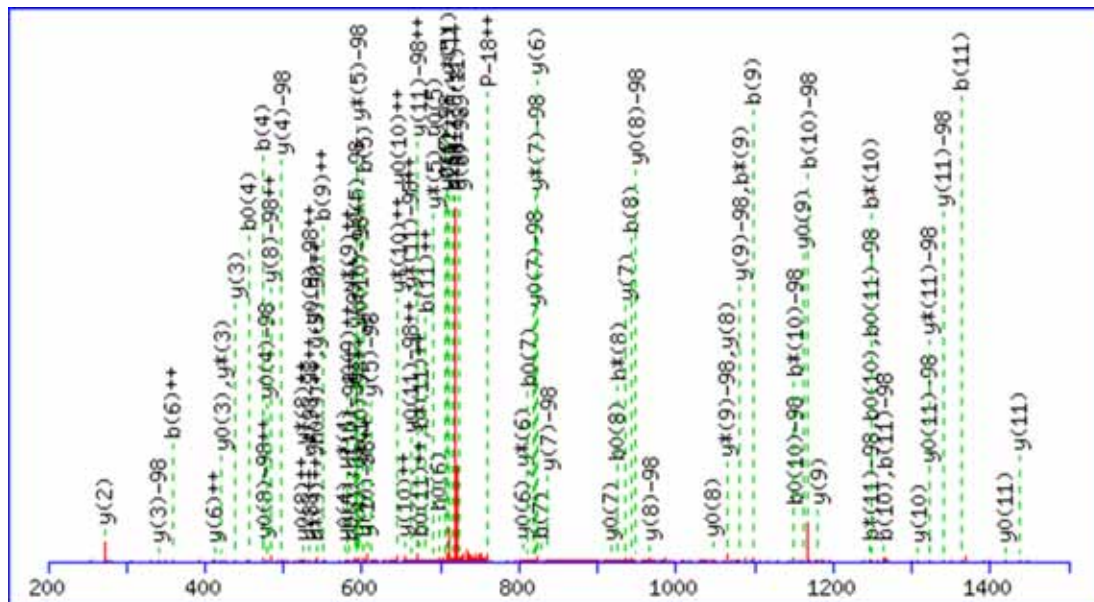

**Monoisotopic mass of neutral peptide Mr(calc):** 1535.6980

**Fixed modifications:** Carbamidomethyl (C) (apply to specified residues or termini only)

**Variable modifications:**

**N-term :** Dimethyl (N-term)

**S10 :** Phospho (ST), with neutral losses 0.0000(shown in table), 97.9769

**Ions Score:** 43 **Expect:** 0.0017

**Matched b ions:** b(3), b(4), b(5), b(6)++, b(6), b(7), b(8), b(9), b(9)++, b(10)-98, b(10), b(10)-98++, b(11)-98, b(11), b(11)++

**Matched y ions:** y(2), y(3), y(3)-98, y(4), y(4)-98, y(5), y(5)-98, y(6), y(6)++, y(6)-98, y(7), y(7)-98, y(8)-98++, y(8)-98, y(8), y(8)++, y(9)-98++, y(9)++, y(9), y(9)-98, y(10)-98++, y(10), y(10)++, y(11)++, y(11)-98, y(11), y(11)-98++

**Precursor origin neutral loss:** +

## Peptide No.19

**AEDEILNRSPR**

**Confirmed sites:** @S:10

**Ambiguous sites:**

**MS/MS Fragmentation of AEDEILNRSPR**

Found in **CALX\_MOUSE**, Calnexin OS=Mus musculus GN=Canx PE=1 SV=1

Match to Query 2451: 1541.729622 from(771.872087,2+)

Title: Elution from: 31.508 to 31.508 scan no 2345 cid35.00 polarity:+MA10



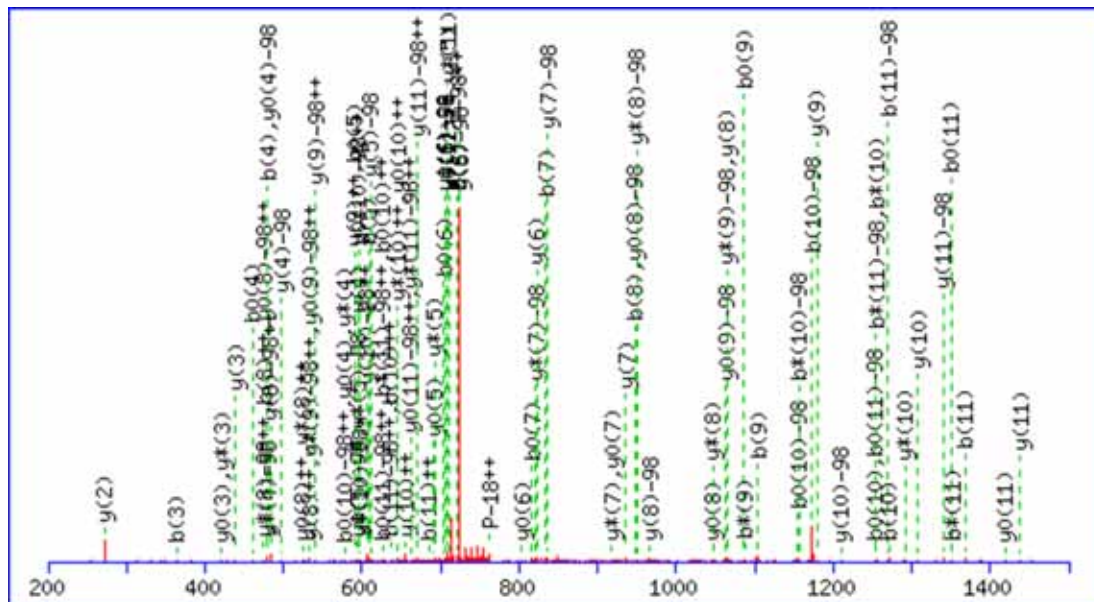

**Monoisotopic mass of neutral peptide Mr(calc):** 1541.7299

**Fixed modifications:** Carbamidomethyl (C) (apply to specified residues or termini only)

**Variable modifications:**

**N-term :** Dimethyl:2H(4)13C(2) (N-term)

**S10 :** Phospho (ST), with neutral losses 0.0000(shown in table), 97.9769

**Ions Score:** 35 **Expect:** 0.013

**Matched b ions:** b(3), b(4), b(5), b(6), b(7), b(8), b(8)++, b(9), b(10)-98, b(10), b(10)++, b(11), b(11)-98, b(11)-98++, b(11)++

**Matched y ions:** y(2), y(3), y(4), y(4)-98, y(5)-98, y(5), y(6), y(6)-98, y(7), y(7)-98, y(8)-98++, y(8)-98, y(8)++, y(8), y(9)-98++, y(9), y(9)++, y(10)-98++, y(10), y(10)++, y(10)-98, y(11)-98, y(11), y(11)-98++

**Precursor origin neutral loss:** +

## Peptide No.20

**AEETPSQLDQDTQVQDMDEGSDDEEEGQK**

**Confirmed sites:** @S:21

**Ambiguous sites:**

MS/MS Fragmentation of **AEETPSQLDQDTQVQDMDEGSDDEEEGQK**

Found in **SF3A1\_MOUSE**, Splicing factor 3A subunit 1 OS=Mus musculus GN=Sf3a1 PE=1 SV=1

Match to Query 8775: 3404.328186 from(1135.783338,3+)

Title: Elution from: 37.755 to 37.755 scan no 3366 cid35.00 polarity:+:MA10:m1s

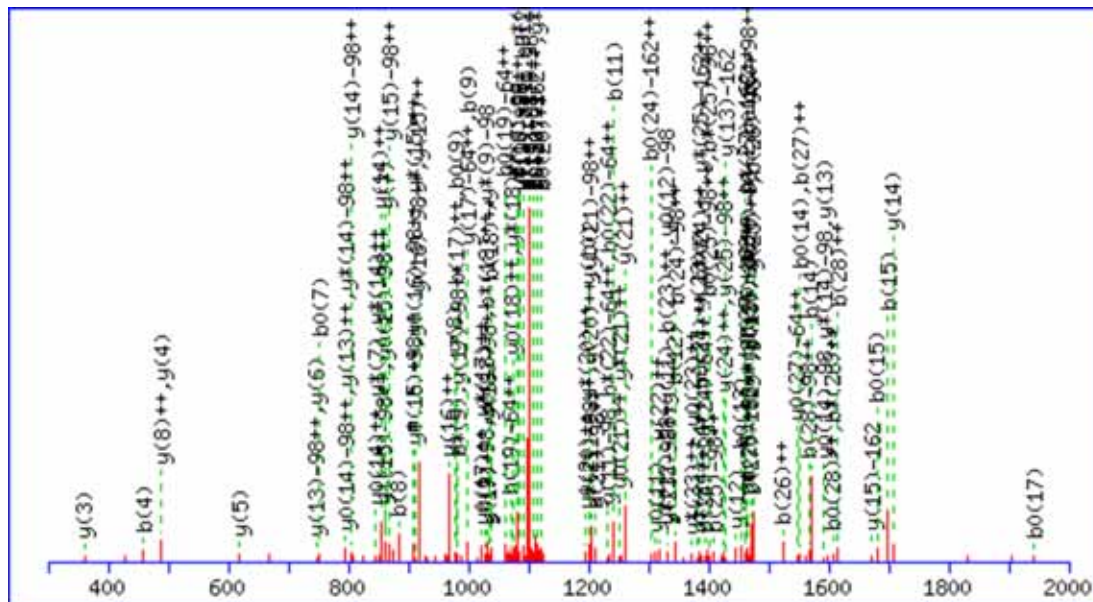

**Monoisotopic mass of neutral peptide Mr(calc):** 3404.3246

**Fixed modifications:** Carbamidomethyl (C) (apply to specified residues or termini only)

**Variable modifications:**

**N-term :** Dimethyl (N-term)

**M17 :** Oxidation (M), with neutral losses 0.0000(shown in table), 63.9983

**S21 :** Phospho (ST), with neutral losses 0.0000(shown in table), 97.9769

**K29 :** Dimethyl (K)

**Ions Score:** 83 **Expect:** 2.4e-007

**Matched b ions:** b(4), b(8), b(9), b(11), b(12), b(13), b(14), b(15), b(17)++, b(18)++, b(19)++, b(23)++, b(24)-98++, b(24)++, b(25)-98++, b(26)-98++, b(26)++, b(27)++, b(28)++, b(28)-98++

**Matched y ions:** y(3), y(4), y(5), y(6), y(7), y(8)++, y(8), y(10)-98, y(10), y(11), y(11)-98, y(12), y(13)++, y(13)-98++, y(13), y(14)++, y(14), y(14)-98++, y(15)++, y(15)-98++, y(16)-98++, y(16)++, y(17)++, y(17)-98++, y(18)++, y(18)-98++, y(19)-98++, y(20)++, y(21)++, y(21)-98++, y(22)++, y(23)-98++, y(23)++, y(24)++, y(25)++, y(25)-98++

**Precursor origin neutral loss:** +

## Peptide No.21

**AEHLGLSGADSDPAK**

**Confirmed sites:** @S:11

**Ambiguous sites:**

**MS/MS Fragmentation of AEHLGLSGADSDPAK**

Found in **COBL\_MOUSE**, Protein cordon-bleu OS=Mus musculus GN=Cobl PE=1 SV=1

Match to Query 4067: 1846.798390 from(924.406471,2+)

Title: Elution from: 33.951 to 33.951 scan no 2676 cid35.00 polarity:+:MA10

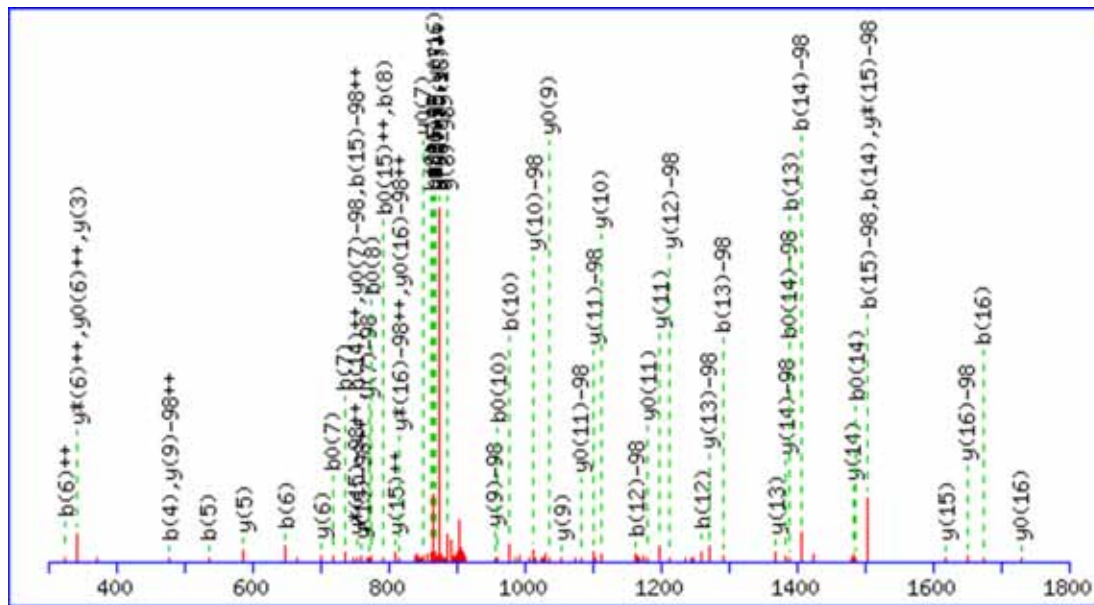

**Monoisotopic mass of neutral peptide Mr(calc):** 1846.7986

**Fixed modifications:** Carbamidomethyl (C) (apply to specified residues or termini only)

**Variable modifications:**

**N-term :** Dimethyl (N-term)

**S11 :** Phospho (ST), with neutral losses 97.9769(shown in table), 0.0000

**K17 :** Dimethyl (K)

**Ions Score:** 87 **Expect:** 7.9e-008

**Matched b ions:** b(4), b(5), b(6), b(6)++, b(7), b(8), b(9), b(10), b(12)-98, b(12), b(13)-98, b(13), b(14)-98, b(14), b(14)++, b(15)-98, b(15)-98++, b(16)

**Matched y ions:** y(3), y(5), y(6), y(7)-98, y(7), y(8)-98, y(9)-98, y(9), y(9)-98, y(10)-98, y(10), y(11)-98, y(11), y(12)-98, y(13)-98, y(13), y(14), y(14)-98, y(15), y(15)++, y(15)-98, y(16)++, y(16)-98

**Precursor origin neutral loss:** +

## Peptide No.22

**AEHLGLSGADSDEDPAK**

**Confirmed sites:** @S:11

**Ambiguous sites:**

MS/MS Fragmentation of **AEHLGLSGADSDEDPAK**

Found in **COBL\_MOUSE**, Protein cordon-bleu OS=Mus musculus GN=Cobl PE=1 SV=1

Match to Query 5427: 1858.862997 from(620.628275,3+)

Title: Elution from: 33.756 to 33.756 scan no 2745 cid35.00 polarity:+:MA10

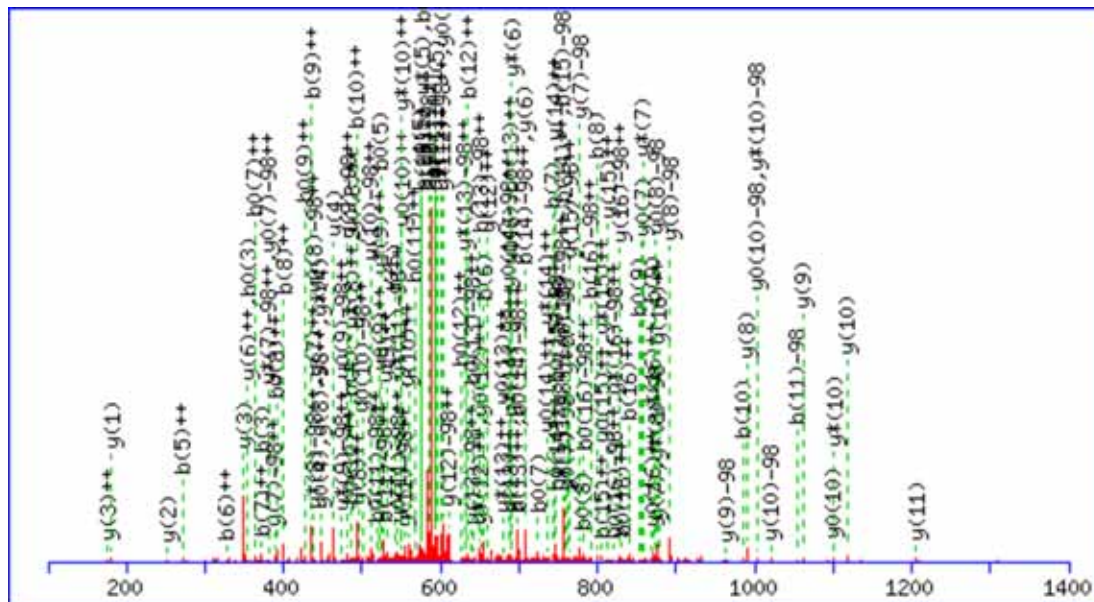

**Monoisotopic mass of neutral peptide Mr(calc):** 1858.8622

**Fixed modifications:** Carbamidomethyl (C) (apply to specified residues or termini only)

**Variable modifications:**

**N-term :** Dimethyl:2H(4)13C(2) (N-term)

**S11 :** Phospho (ST), with neutral losses 0.0000(shown in table), 97.9769

**K17 :** Dimethyl:2H(4)13C(2) (K)

**Ions Score:** 63 **Expect:** 2.7e-005

**Matched b ions:** b(3), b(4), b(5)++, b(5), b(6)++, b(6), b(7)++, b(7), b(8)++, b(8), b(9)++, b(9), b(10)++, b(10), b(11)-98++, b(11)-98, b(11)++, b(12)-98++, b(12)++, b(13)++, b(13)-98++, b(14)++, b(14)-98++, b(15)-98++, b(15)++, b(16)++, b(16)-98++

**Matched y ions:** y(1), y(2), y(3), y(3)++, y(4), y(5), y(6), y(6)++, y(7)-98, y(7), y(7)-98++, y(7)++, y(8)-98, y(8), y(8)-98++, y(8)++, y(9), y(9)++, y(9)-98, y(9)-98++, y(10), y(10)-98, y(10)++, y(10)-98++, y(11), y(11)++, y(11)-98++, y(12)-98++, y(12)++, y(13)-98++, y(13)++, y(14)++, y(15)-98++, y(15)++, y(16)++, y(16)-98++

**Precursor origin neutral loss:** +

## Peptide No.23

**AEIDSHSFGEKNSTLSEEDYIER**

**Confirmed sites:** @S:13,@Y:20

**Ambiguous sites:**

MS/MS Fragmentation of **AEIDSHSFGEKNSTLSEEDYIER**

Found in **BNIP3\_MOUSE**, BCL2/adenovirus E1B 19 kDa protein-interacting protein 3 OS=Mus musculus GN=Bnip3 PE=1 SV=1

Match to Query 8707: 2871.190947 from(958.070925,3+)

Title: Elution from: 46.988 to 46.988 scan no 4571 cid35.00 polarity:+:MA10:m1s



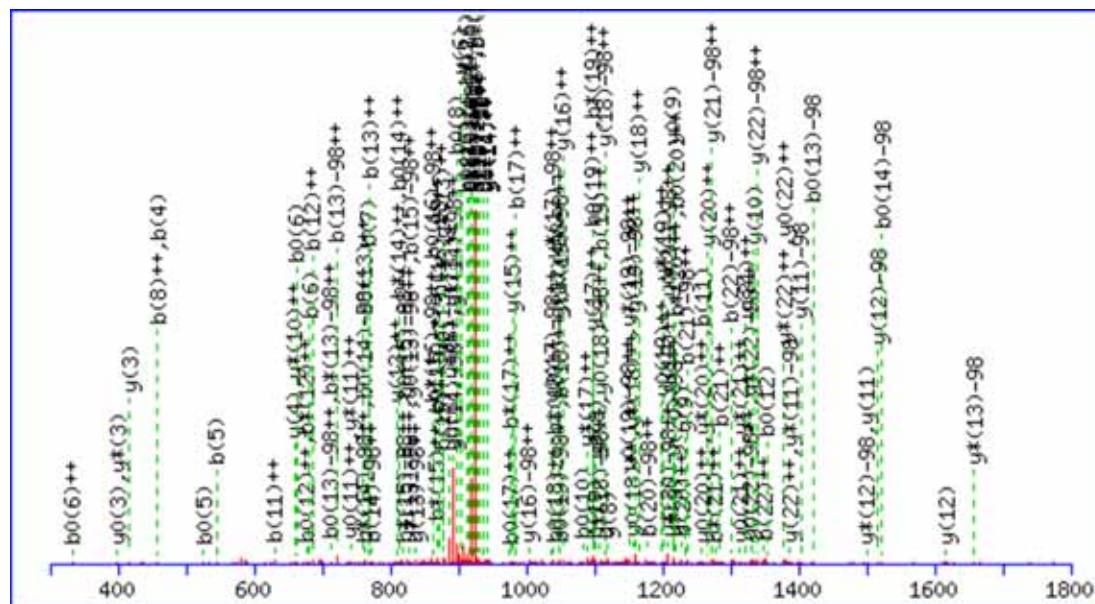

**Monoisotopic mass of neutral peptide Mr(calc):** 2871.1888

**Fixed modifications:** Carbamidomethyl (C) (apply to specified residues or termini only)

**Variable modifications:**

**N-term :** Dimethyl (N-term)

**K11 :** Dimethyl (K)

**S13 :** Phospho (ST), with neutral losses 97.9769(shown in table), 0.0000

**Y20 :** Phospho (Y)

**Ions Score:** 35 **Expect:** 0.018

**Matched b ions:** b(4), b(5), b(6), b(7), b(8)++, b(8), b(10), b(11)++, b(11), b(12)++, b(13)-98++, b(13)++, b(14)-98++, b(15)-98++, b(15)++, b(16)++, b(16)-98++, b(17)-98++, b(17)++, b(18)++, b(19)++, b(20)++, b(20)-98++, b(21)-98++, b(21)++, b(22)-98++, b(22)++

**Matched y ions:** y(3), y(4), y(6), y(8), y(9), y(10), y(11), y(11)-98, y(12)-98, y(12), y(12)++, y(13)++, y(13)-98++, y(15)-98++, y(15)++, y(16)-98++, y(16)++, y(17)-98++, y(17)++, y(18)++, y(18)-98++, y(19)++, y(19)-98++, y(20)-98++, y(20)++, y(21)-98++, y(21)++, y(22)-98++, y(22)++

**Precursor origin neutral loss:** +

## Peptide No.24

**AEIDSHSFGEKNSTLSEEDYIER**

**Confirmed sites:** @S:13,@Y:20

**Ambiguous sites:**

**MS/MS Fragmentation of AEIDSHSFGEKNSTLSEEDYIER**

Found in **BNIP3\_MOUSE**, BCL2/adenovirus E1B 19 kDa protein-interacting protein 3 OS=Mus musculus GN=Bnip3 PE=1 SV=1

Match to Query 6774: 2883.253077 from(962.091635,3+)

Title: Elution from: 47.045 to 47.045 scan no 4250 cid35.00 polarity:+:MA10:m1s

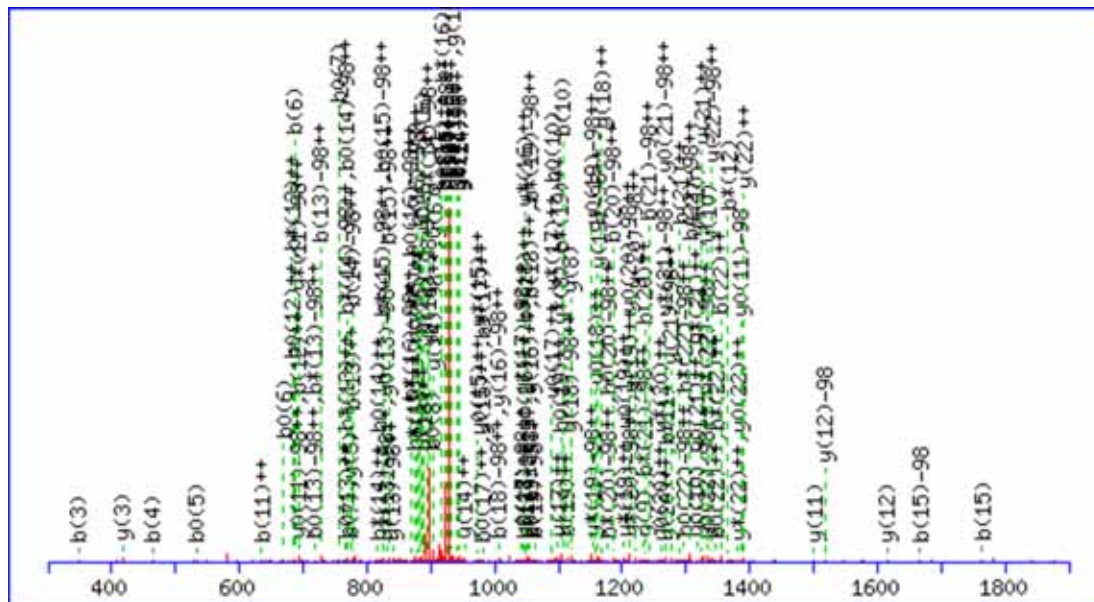

**Monoisotopic mass of neutral peptide Mr(calc):** 2883.2525

**Fixed modifications:** Carbamidomethyl (C) (apply to specified residues or termini only)

**Variable modifications:**

**N-term :** Dimethyl:2H(4)13C(2) (N-term)

**K11 :** Dimethyl:2H(4)13C(2) (K)

**S13 :** Phospho (ST), with neutral losses 97.9769(shown in table), 0.0000

**Y20 :** Phospho (Y)

**Ions Score:** 46 **Expect:** 0.0021

**Matched b ions:** b(3), b(4), b(6), b(7), b(8), b(10), b(11)++, b(11), b(12)++, b(13)-98++, b(13)++, b(14)-98++, b(15)-98, b(15), b(15)-98++, b(15)++, b(16)-98++, b(16)++, b(17)-98++, b(18)-98++, b(18)++, b(19)-98++, b(19)++, b(20)-98++, b(20)++, b(21)-98++, b(21)++, b(22)-98++, b(22)++

**Matched y ions:** y(3), y(5), y(6), y(8), y(9), y(10), y(11), y(12)-98, y(12), y(13)-98++, y(13)++, y(14)-98++, y(14)++, y(15)++, y(15)-98++, y(16)-98++, y(16)++, y(17)-98++, y(17)++, y(18)-98++, y(18)++, y(19)++, y(19)-98++, y(20)-98++, y(20)++, y(21)-98++, y(21)++, y(22)++, y(22)-98++

**Precursor origin neutral loss:** +

## Peptide No.25

**AEPTSPQFPFADMPPPDYK**

**Confirmed sites:** @T:4,@S:6

**Ambiguous sites:**

MS/MS Fragmentation of **AEPTSPQFPFADMPPPDYK**

Found in **TITIN\_MOUSE**, Titin OS=Mus musculus GN=Ttn PE=1 SV=1

Match to Query 7780: 2564.062380 from(855.694736,3+)

Title: Elution from: 60.454 to 60.454 scan no 5983 cid35.00 polarity:+:MA10:m1s

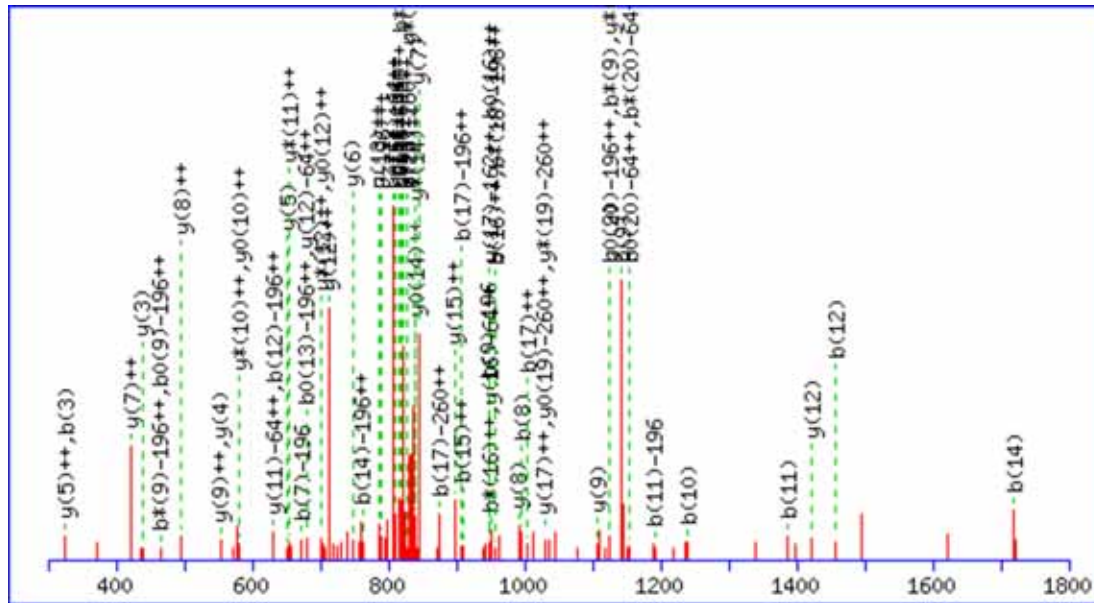

**Monoisotopic mass of neutral peptide Mr(calc):** 2564.0623

**Fixed modifications:** Carbamidomethyl (C) (apply to specified residues or termini only)

**Variable modifications:**

**N-term :** Dimethyl (N-term)

**T4 :** Phospho (ST), with neutral losses 0.0000(shown in table), 97.9769

**S6 :** Phospho (ST), with neutral losses 0.0000(shown in table), 97.9769

**M14 :** Oxidation (M), with neutral losses 0.0000(shown in table), 63.9983

**K21 :** Dimethyl (K)

**Ions Score:** 32 **Expect:** 0.031

**Matched b ions:** b(3), b(6)-98, b(7)-196, b(8), b(8)-98, b(9), b(9)-98, b(9)-196, b(10)-98, b(10), b(11), b(11)-196, b(12), b(12)-196++, b(13)-98++, b(14)-98, b(14), b(14)-98++, b(14)-196++, b(15)-98, b(15)-196++, b(15)++, b(16)-98++, b(16)++, b(17)-196++, b(17)-98++, b(17)++

**Matched y ions:** y(3), y(4), y(5)++, y(5), y(6), y(7)++, y(7), y(8)++, y(8), y(9)++, y(9), y(12)++, y(12), y(13)++, y(15)++, y(17)++

**Precursor origin neutral loss:** +

## Peptide No.26

**AEVDTESGEKVEDQGEPRLDAGSAIEANK**

**Confirmed sites:** @S:7

**Ambiguous sites:**

MS/MS Fragmentation of **AEVDTESGEKVEDQGEPRLDAGSAIEANK**

Found in **SRCA\_MOUSE**, Sarcalumenin OS=Mus musculus GN=Srl PE=1 SV=1

Match to Query 8770: 3391.569368 from(848.899618,4+)

Title: Elution from: 39.952 to 39.952 scan no 3659 cid35.00 polarity:+:MA10:m1s

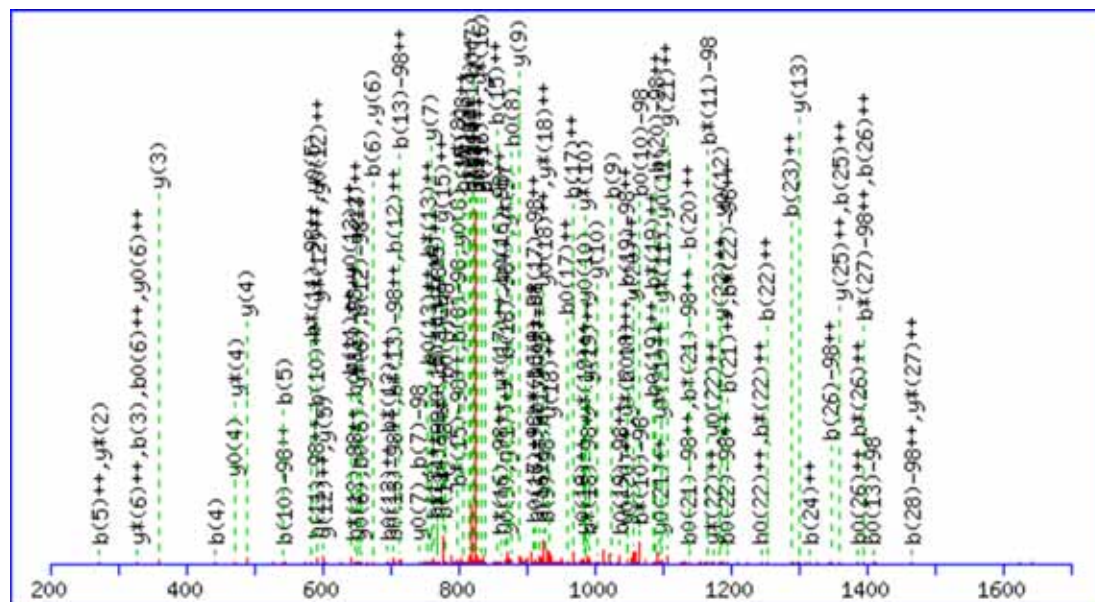

**Monoisotopic mass of neutral peptide Mr(calc):** 3391.5668

**Fixed modifications:** Carbamidomethyl (C) (apply to specified residues or termini only)

**Variable modifications:**

**N-term :** Dimethyl (N-term)

**S7 :** Phospho (ST), with neutral losses 0.0000(shown in table), 97.9769

**K10 :** Dimethyl (K)

**K31 :** Dimethyl (K)

**Ions Score:** 70 **Expect:** 1.2e-005

**Matched b ions:** b(3), b(4), b(5)++, b(5), b(6), b(7)-98, b(7), b(8)-98, b(9)-98, b(9), b(10)-98++, b(10)++, b(11)-98++, b(11)++, b(12)++, b(12)-98++, b(13)++, b(13)-98++, b(14)-98++, b(14)++, b(15)-98++, b(15)++, b(16)-98++, b(16)++, b(17)++, b(17)-98++, b(18)++, b(19)-98++, b(20)++, b(20)-98++, b(21)++, b(22)++, b(23)++, b(24)++, b(25)++, b(26)-98++, b(26)++, b(28)-98++

**Matched y ions:** y(3), y(4), y(5), y(6), y(7), y(8), y(9), y(10), y(12)++, y(13), y(13)++, y(15)++, y(17)++, y(18)++, y(19)++, y(20)++, y(21)++, y(22)++, y(25)++

**Precursor origin neutral loss:** +

## Peptide No.27

**AEVDTESGEKVEDQGEPRLDAGSAIEANK**

**Confirmed sites:** @T:5

**Ambiguous sites:**

MS/MS Fragmentation of **AEVDTESGEKVEDQGEPRLDAGSAIEANK**

Found in **SRCA\_MOUSE**, Sarcalumenin OS=Mus musculus GN=Srl PE=1 SV=1

Match to Query 8769: 3391.568428 from(848.899383,4+)

Title: Elution from: 40.391 to 40.391 scan no 3718 cid35.00 polarity:+:MA10:m1s



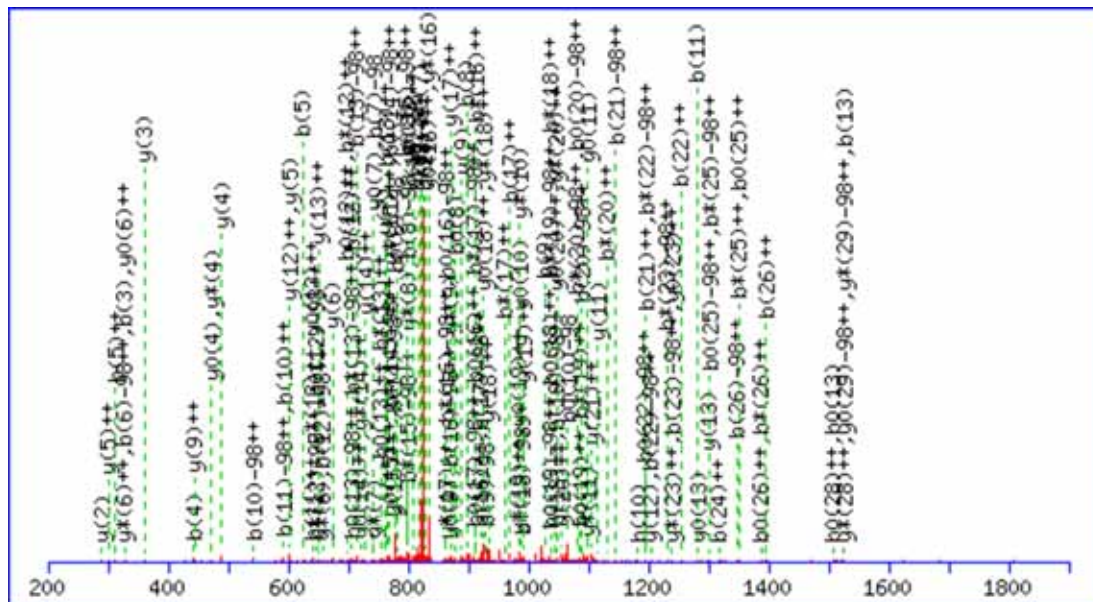

**Monoisotopic mass of neutral peptide Mr(calc):** 3391.5668

**Fixed modifications:** Carbamidomethyl (C) (apply to specified residues or termini only)

**Variable modifications:**

**N-term :** Dimethyl (N-term)

**T5 :** Phospho (ST), with neutral losses 0.0000(shown in table), 97.9769

**K10 :** Dimethyl (K)

**K31 :** Dimethyl (K)

**Ions Score:** 45 **Expect:** 0.0038

**Matched b ions:** b(3), b(4), b(5)++, b(5), b(6)-98++, b(7)-98, b(8)-98, b(8), b(9)-98, b(9), b(10)-98++, b(10)++, b(10), b(11)-98++, b(11)++, b(11), b(12)-98++, b(12)++, b(13)++, b(13), b(13)-98++, b(14)-98++, b(14)++, b(15)-98++, b(16)++, b(16)-98++, b(17)-98++, b(17)++, b(18)++, b(19)-98++, b(20)-98++, b(21)-98++, b(21)++, b(22)-98++, b(22)++, b(23)-98++, b(24)++, b(26)++, b(26)-98++

**Matched y ions:** y(2), y(3), y(4), y(5), y(5)++, y(6), y(7), y(8), y(9)++, y(9), y(11), y(12)++, y(12), y(13), y(13)++, y(14)++, y(15)++, y(17)++, y(18)++, y(19)++, y(20)++, y(21)++

**Precursor origin neutral loss:** +

## Peptide No.28

**AEYVFIVDSDGEDEATCR**

**Confirmed sites:** @S:9

**Ambiguous sites:**

MS/MS Fragmentation of **AEYVFIVDSDGEDEATCR**

Found in **CF142\_MOUSE**, Uncharacterized protein C6orf142 homolog OS=Mus musculus PE=2 SV=1

Match to Query 5867: 2182.879220 from(1092.446886,2+)

Title: Elution from: 54.591 to 54.591 scan no 5238 cid35.00 polarity:+:MA10:m1s

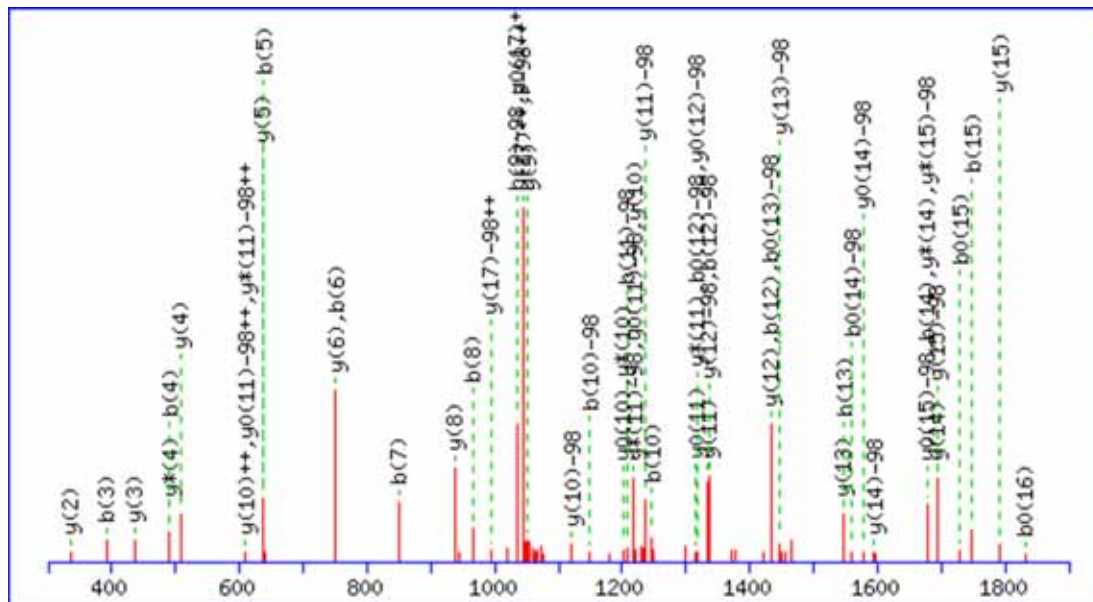

**Monoisotopic mass of neutral peptide Mr(calc):** 2182.8766

**Fixed modifications:** Carbamidomethyl (C) (apply to specified residues or termini only)

**Variable modifications:**

**N-term :** Dimethyl (N-term)

**S9 :** Phospho (ST), with neutral losses 97.9769(shown in table), 0.0000

**Ions Score:** 98 **Expect:** 5e-009

**Matched b ions:** b(3), b(4), b(5), b(6), b(7), b(8), b(9)-98, b(10), b(10)-98, b(11)-98, b(12), b(12)-98, b(13), b(14), b(15)

**Matched y ions:** y(2), y(3), y(4), y(5), y(6), y(8), y(9), y(10)++, y(10), y(10)-98, y(11), y(11)-98, y(12), y(12)-98, y(13), y(13)-98, y(14), y(14)-98, y(15)-98, y(15), y(17)++, y(17)-98++

**Precursor origin neutral loss:** +

## Peptide No.29

**AEYVFIVDSGGEDEATCR**

**Confirmed sites:** @S:9

**Ambiguous sites:**

MS/MS Fragmentation of **AEYVFIVDSGGEDEATCR**

Found in **CF142\_MOUSE**, Uncharacterized protein C6orf142 homolog OS=Mus musculus PE=2 SV=1

Match to Query 5643: 2188.911308 from(1095.462930,2+)

Title: Elution from: 54.214 to 54.214 scan no 5183 cid35.00 polarity:+:MA10:m1s

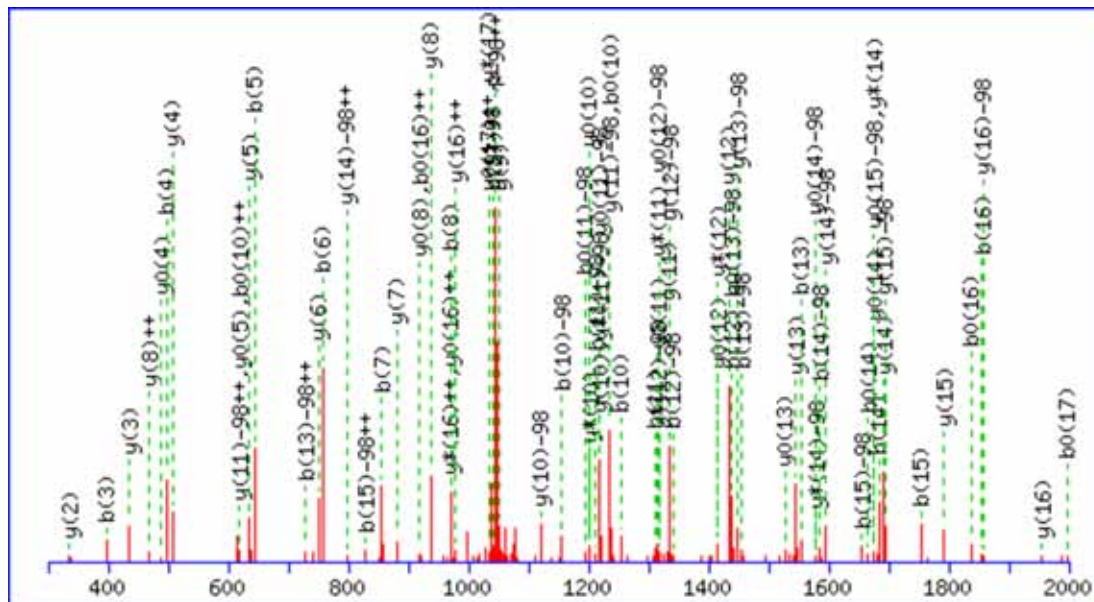

**Monoisotopic mass of neutral peptide Mr(calc):** 2188.9084

**Fixed modifications:** Carbamidomethyl (C) (apply to specified residues or termini only)

**Variable modifications:**

**N-term :** Dimethyl:2H(4)13C(2) (N-term)

**S9 :** Phospho (ST), with neutral losses 0.0000(shown in table), 97.9769

**Ions Score:** 98 **Expect:** 6.4e-009

**Matched b ions:** b(3), b(4), b(5), b(6), b(7), b(8), b(9)-98, b(10)-98, b(10), b(11), b(11)-98, b(12), b(12)-98, b(13), b(13)-98++, b(13)-98, b(14), b(14)-98, b(15), b(15)-98++, b(15)-98, b(16)

**Matched y ions:** y(2), y(3), y(4), y(5), y(6), y(7), y(8), y(8)++, y(9), y(10), y(10)-98, y(11)-98, y(11)-98++, y(11), y(12), y(12)-98, y(13), y(13)-98, y(14), y(14)-98, y(14)-98++, y(15), y(15)-98, y(16), y(16)-98, y(16)++, y(17)++

**Precursor origin neutral loss:** +

## Peptide No.30

**AGAEGSSNVFSMFDQTQIQEFK**

**Confirmed sites:** @S:6

**Ambiguous sites:**

MS/MS Fragmentation of **AGAEGSSNVFSMFDQTQIQEFK**

Found in **MLRS\_MOUSE**, Myosin regulatory light chain 2, skeletal muscle isoform OS=Mus musculus GN=MyIpf PE=1 SV=3

Match to Query 6763: 2572.119876 from(858.380568,3+)

Title: Elution from: 63.316 to 63.316 scan no 5991 cid35.00 polarity:+:MA10:m1s

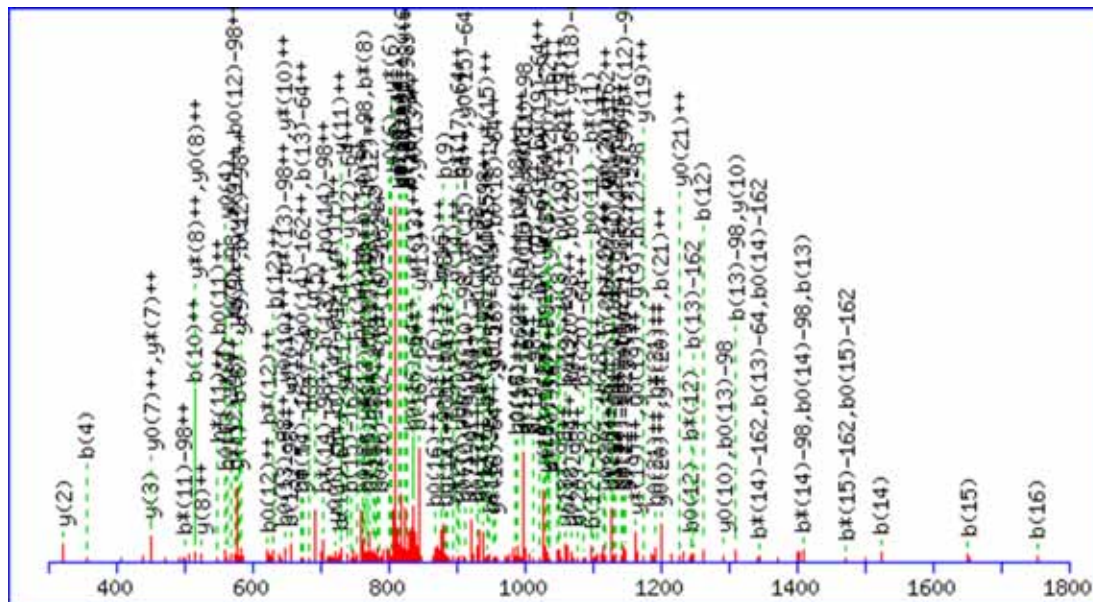

**Monoisotopic mass of neutral peptide Mr(calc):** 2572.1193

**Fixed modifications:** Carbamidomethyl (C) (apply to specified residues or termini only)

**Variable modifications:**

**N-term :** Dimethyl (N-term)

**S6 :** Phospho (ST), with neutral losses 0.0000(shown in table), 97.9769

**M12 :** Oxidation (M), with neutral losses 0.0000(shown in table), 63.9983

**K22 :** Dimethyl (K)

**Ions Score:** 62 **Expect:** 4.9e-005

**Matched b ions:** b(4), b(6), b(7)-98, b(8)-98, b(8), b(9), b(9)-98, b(10), b(10)++, b(10)-98, b(12), b(12)-98++, b(12)-98, b(12)++, b(13), b(13)++, b(13)-98, b(13)-98++, b(14), b(14)++, b(15), b(15)++, b(15)-98++, b(16), b(16)++, b(16)-98++, b(17)++, b(18)++, b(18)-98++, b(19)++, b(19)-98++, b(20)++, b(20)-98++, b(21)++

**Matched y ions:** y(2), y(3), y(4), y(5), y(6), y(7), y(8)++, y(8), y(9)++, y(9), y(10), y(10)++, y(11)++, y(12)++, y(13)++, y(14)++, y(15)++, y(16)++, y(17)-98++, y(18)-98++, y(18)++, y(19)++

**Precursor origin neutral loss:** +

## Peptide No.31

**AGAEGSSNVFSMFDQTQIQEFK**

**Confirmed sites:** @S:6,@S:7

**Ambiguous sites:**

MS/MS Fragmentation of **AGAEGSSNVFSMFDQTQIQEFK**

Found in **MLRS\_MOUSE**, Myosin regulatory light chain 2, skeletal muscle isoform OS=Mus musculus GN=MyIpf PE=1 SV=3

Match to Query 6948: 2652.088818 from(885.036882,3+)

Title: Elution from: 68.955 to 68.955 scan no 6441 cid35.00 polarity:+:MA10:m1s



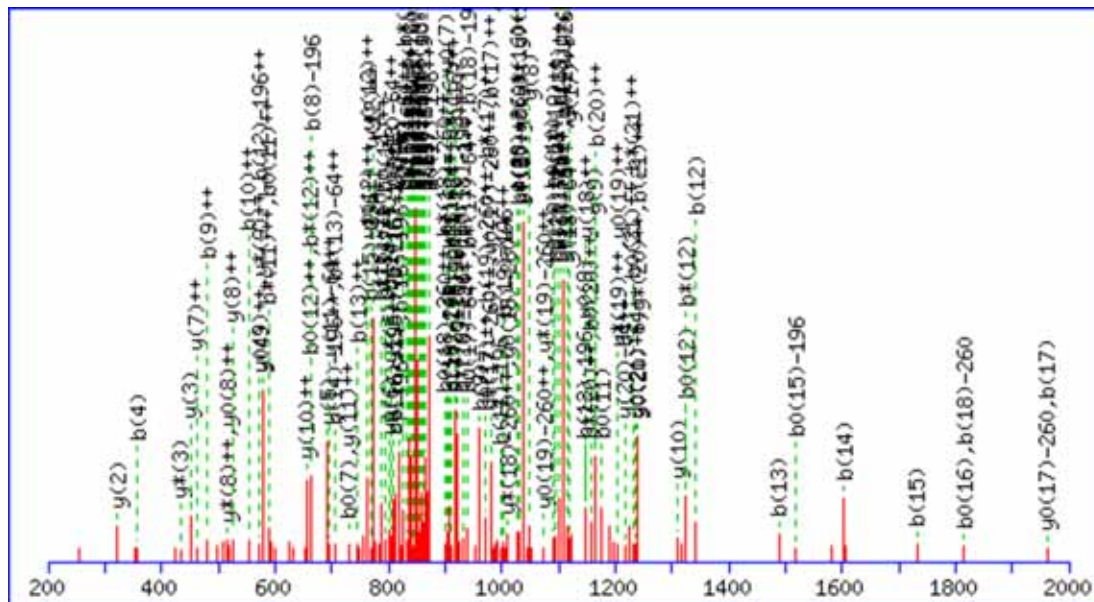

**Monoisotopic mass of neutral peptide Mr(calc):** 2652.0856

**Fixed modifications:** Carbamidomethyl (C) (apply to specified residues or termini only)

**Variable modifications:**

**N-term :** Dimethyl (N-term)

**S6 :** Phospho (ST), with neutral losses 0.0000(shown in table), 97.9769

**S7 :** Phospho (ST), with neutral losses 0.0000(shown in table), 97.9769

**M12 :** Oxidation (M), with neutral losses 0.0000(shown in table), 63.9983

**K22 :** Dimethyl (K)

**Ions Score:** 66 **Expect:** 1.3e-005

**Matched b ions:** b(4), b(8)-196, b(8)-98, b(8), b(9), b(9)++, b(9)-98, b(10), b(10)++, b(10)-98, b(10)-196, b(11)-196, b(12), b(12)-196, b(12)-196++, b(13), b(13)++, b(14), b(14)-196++, b(14)++, b(15), b(15)++, b(15)-196++, b(15)-98++, b(16)++, b(16)-196++, b(16)-98++, b(17), b(17)++, b(17)-98++, b(18)++, b(18)-196++, b(18)-98++, b(19)++, b(19)-196++, b(19)-98++, b(20)++, b(20)-98++, b(21)++, b(21)-98++

**Matched y ions:** y(2), y(3), y(4), y(5), y(6), y(7), y(7)++, y(8)++, y(8), y(9), y(10)++, y(10), y(11)++, y(12)++, y(13)++, y(17)++, y(18)++, y(19)-98++

**Precursor origin neutral loss:** +

## Peptide No.32

**AGAEGSSNVFSMFDQTQIQEFK**

**Confirmed sites:** @S:7

**Ambiguous sites:**

MS/MS Fragmentation of **AGAEGSSNVFSMFDQTQIQEFK**

Found in **MLRS\_MOUSE**, Myosin regulatory light chain 2, skeletal muscle isoform OS=Mus musculus GN=Mylpf PE=1 SV=3

Match to Query 6260: 2572.122237 from(858.381355,3+)

Title: Elution from: 63.278 to 63.278 scan no 5838 cid35.00 polarity:+:MA10:m1s

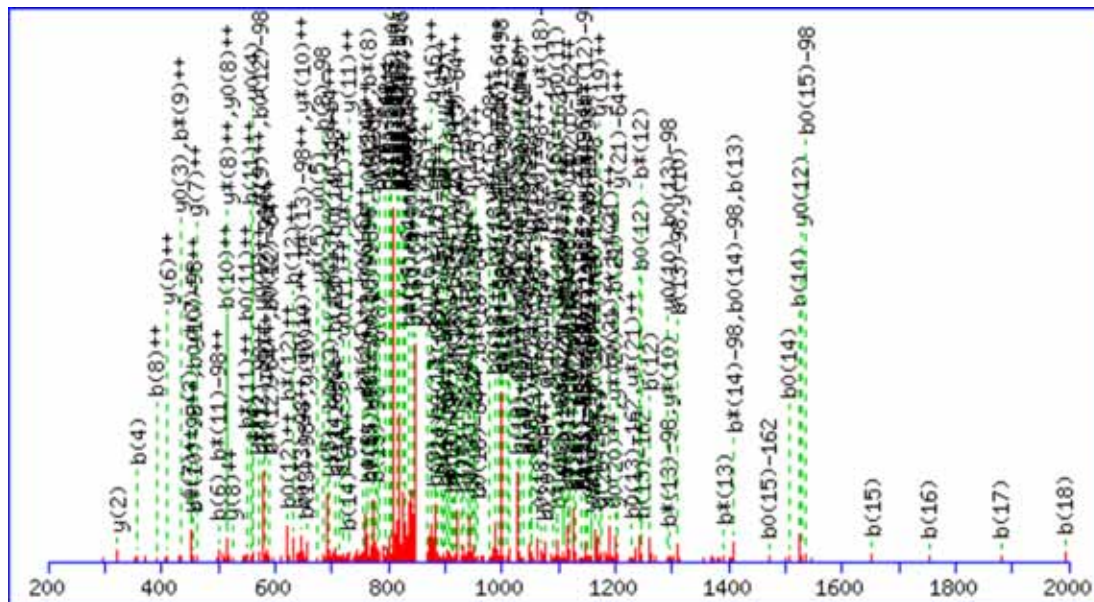

**Monoisotopic mass of neutral peptide Mr(calc):** 2572.1193

**Fixed modifications:** Carbamidomethyl (C) (apply to specified residues or termini only)

**Variable modifications:**

**N-term :** Dimethyl (N-term)

**S7 :** Phospho (ST), with neutral losses 0.0000(shown in table), 97.9769

**M12 :** Oxidation (M), with neutral losses 0.0000(shown in table), 63.9983

**K22 :** Dimethyl (K)

**Ions Score:** 65 **Expect:** 2.1e-005

**Matched b ions:** b(4), b(6), b(8)++, b(8)-98, b(8), b(9), b(9)-98, b(10), b(10)++, b(10)-98, b(11)++, b(11), b(12), b(12)++, b(12)-98, b(12)-98++, b(13)-98, b(13), b(13)-98++, b(13)++, b(14), b(14)++, b(14)-98++, b(15), b(15)-98++, b(15)++, b(16), b(16)-98++, b(16)++, b(17), b(17)++, b(17)-98++, b(18)++, b(18), b(18)-98++, b(19)++, b(19)-98++, b(20)++, b(20)-98++, b(21)++, b(21)-98++

**Matched y ions:** y(2), y(3), y(4), y(5), y(6), y(6)++, y(7), y(7)++, y(8), y(8)++, y(9), y(9)++, y(10), y(10)++, y(11)++, y(12)++, y(13)++, y(14)++, y(15)++, y(16)++, y(17)-98++, y(18)++, y(19)++

**Precursor origin neutral loss:** +

## Peptide No.33

**AGAEGSSNVFSMFDQTQIQEFK**

**Confirmed sites:** @S:6

**Ambiguous sites:**

MS/MS Fragmentation of **AGAEGSSNVFSMFDQTQIQEFK**

Found in **MLRS\_MOUSE**, Myosin regulatory light chain 2, skeletal muscle isoform OS=Mus musculus GN=Mylpf PE=1 SV=3

Match to Query 6294: 2584.187475 from(862.403101,3+)

Title: Elution from: 63.620 to 63.620 scan no 5869 cid35.00 polarity:+:MA10:m1s

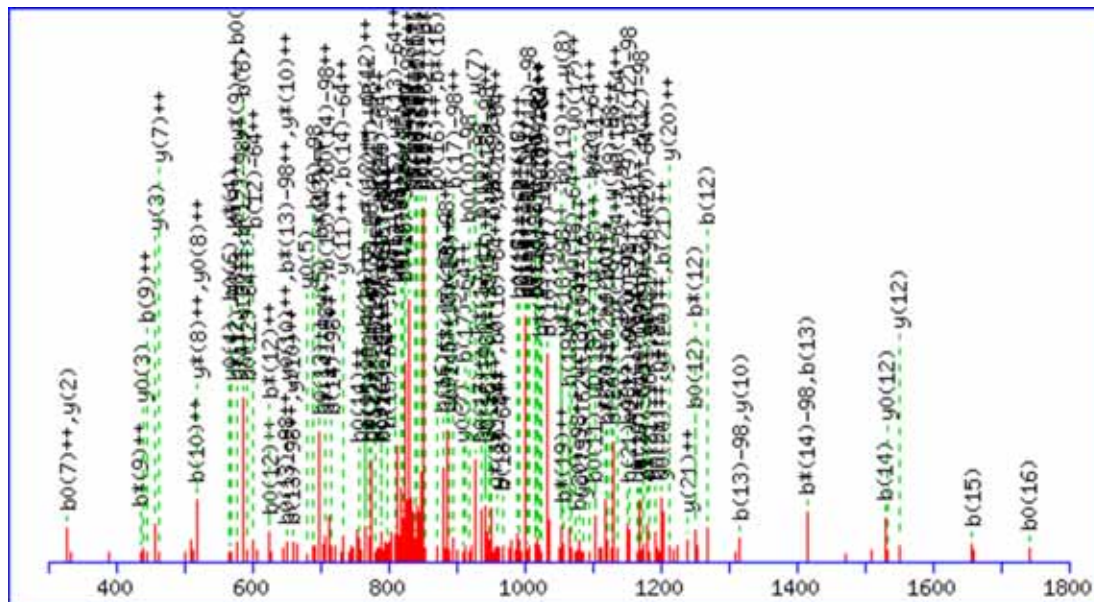

**Monoisotopic mass of neutral peptide Mr(calc):** 2584.1829

**Fixed modifications:** Carbamidomethyl (C) (apply to specified residues or termini only)

**Variable modifications:**

**N-term :** Dimethyl:2H(4)13C(2) (N-term)

**S6 :** Phospho (ST), with neutral losses 0.0000(shown in table), 97.9769

**M12 :** Oxidation (M), with neutral losses 0.0000(shown in table), 63.9983

**K22 :** Dimethyl:2H(4)13C(2) (K)

**Ions Score:** 66 **Expect:** 2.2e-005

**Matched b ions:** b(6), b(7)-98, b(8)-98, b(8), b(9), b(9)++, b(9)-98, b(10), b(10)++, b(10)-98, b(11), b(12)-98++, b(12), b(12)-98, b(13), b(13)++, b(13)-98, b(13)-98++, b(14), b(14)++, b(14)-98++, b(15), b(15)++, b(15)-98++, b(16)++, b(16)-98++, b(17)++, b(17)-98++, b(18)++, b(18)-98++, b(19)++, b(19)-98++, b(20)++, b(20)-98++, b(21)++, b(21)-98++

**Matched y ions:** y(2), y(3), y(4), y(5), y(6), y(7), y(7)++, y(8), y(9)++, y(9), y(10), y(10)++, y(11)++, y(12), y(12)++, y(13)++, y(16)++, y(17)-98++, y(19)++, y(19)-98++, y(20)++, y(21)++

**Precursor origin neutral loss:** +

## Peptide No.34

**AGAEGSSNVFSMFDQTQIQEFK**

**Confirmed sites:** @S:6,@S:7

**Ambiguous sites:**

MS/MS Fragmentation of **AGAEGSSNVFSMFDQTQIQEFK**

Found in **MLRS\_MOUSE**, Myosin regulatory light chain 2, skeletal muscle isoform OS=Mus musculus GN=Mylpf PE=1 SV=3

Match to Query 6981: 2664.151233 from(889.057687,3+)

Title: Elution from: 69.003 to 69.003 scan no 6447 cid35.00 polarity:+:MA10:m1s



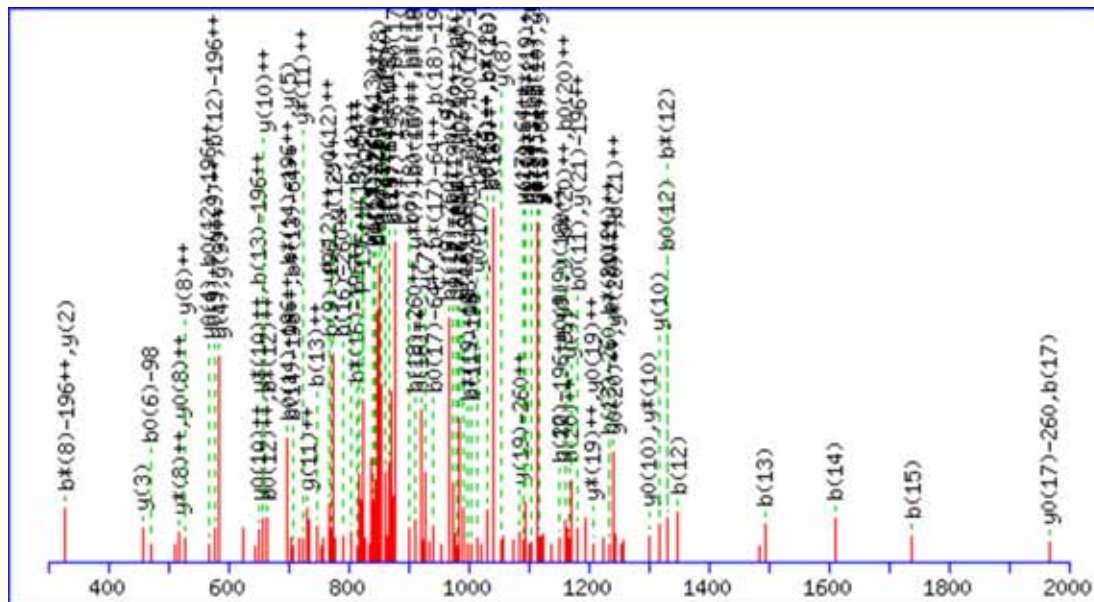

**Monoisotopic mass of neutral peptide Mr(calc):** 2664.1492

**Fixed modifications:** Carbamidomethyl (C) (apply to specified residues or termini only)

**Variable modifications:**

**N-term :** Dimethyl:2H(4)13C(2) (N-term)

**S6 :** Phospho (ST), with neutral losses 0.0000(shown in table), 97.9769

**S7 :** Phospho (ST), with neutral losses 0.0000(shown in table), 97.9769

**M12 :** Oxidation (M), with neutral losses 0.0000(shown in table), 63.9983

**K22 :** Dimethyl:2H(4)13C(2) (K)

**Ions Score:** 67 **Expect:** 1.4e-005

**Matched b ions:** b(7)-98++, b(8)-98, b(8), b(9), b(9)-98, b(9)-196, b(10), b(10)-98, b(11)-196, b(11)-98, b(12), b(12)-196++, b(12)-98++, b(12)-196, b(13)-98++, b(13), b(13)-196++, b(13)++, b(14), b(14)-196++, b(14)-98++, b(14)++, b(15), b(15)-98++, b(15)++, b(16)-98++, b(16)++, b(17), b(17)++, b(17)-98++, b(18)++, b(18)-98++, b(18)-196++, b(19)-98++, b(19)++, b(20)++, b(20)-98++, b(21)++, b(21)-98++

**Matched y ions:** y(2), y(3), y(4), y(5), y(6), y(7), y(8)++, y(8), y(9)++, y(9), y(10), y(10)++, y(11)++, y(12)++, y(13)++, y(16)-98++, y(17)-98++, y(18)++, y(18)-98++, y(19)-98++, y(20)-196++, y(21)-196++

**Precursor origin neutral loss:** +

## Peptide No.35

**AGAEGSSNVFSMFDQTQIQEFK**

**Confirmed sites:**

**Ambiguous sites:** @S:6orS:7

MS/MS Fragmentation of **AGAEGSSNVFSMFDQTQIQEFK**

Found in **MLRS\_MOUSE**, Myosin regulatory light chain 2, skeletal muscle isoform OS=Mus musculus GN=Mylpf PE=1 SV=3

Match to Query 6795: 2584.184064 from(862.401964,3+)

Title: Elution from: 63.361 to 63.361 scan no 5995 cid35.00 polarity:+:MA10:m1s



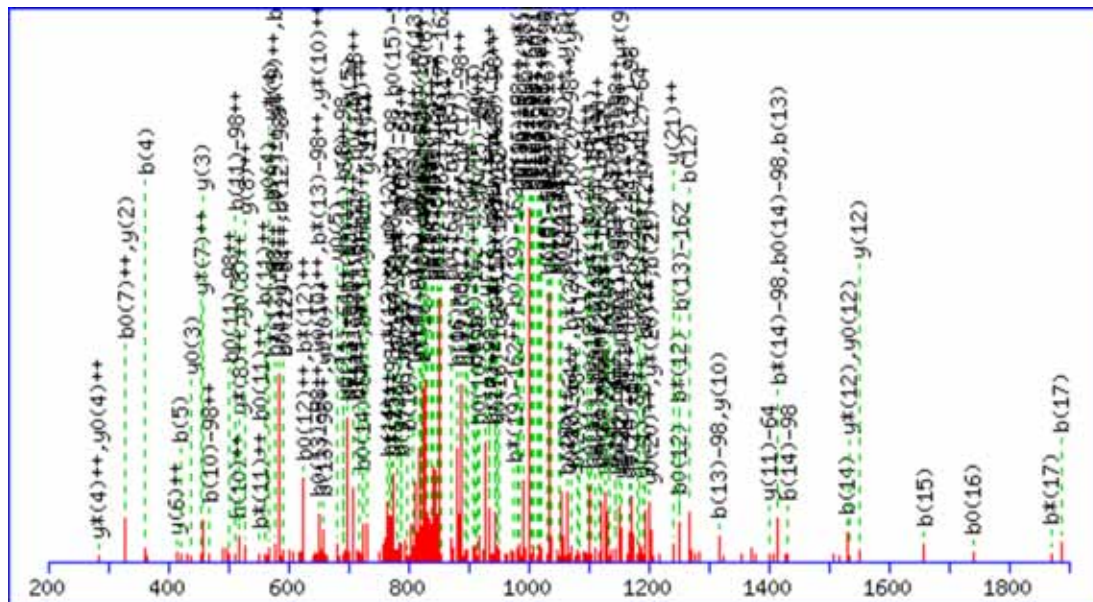

**Monoisotopic mass of neutral peptide Mr(calc):** 2584.1829

**Fixed modifications:** Carbamidomethyl (C) (apply to specified residues or termini only)

**Variable modifications:**

**N-term :** Dimethyl:2H(4)13C(2) (N-term)

**S7 :** Phospho (ST), with neutral losses 0.0000(shown in table), 97.9769

**M12 :** Oxidation (M), with neutral losses 0.0000(shown in table), 63.9983

**K22 :** Dimethyl:2H(4)13C(2) (K)

**Ions Score:** 71 **Expect:** 7.9e-006

**Matched b ions:** b(4), b(5), b(7)-98, b(8)-98, b(8), b(9), b(9)-98, b(10)++, b(10), b(10)-98++, b(10)-98, b(11)-98++, b(11)++, b(11), b(12)-98++, b(12)-98, b(12), b(13)-98, b(13), b(13)++, b(13)-98++, b(14), b(14)++, b(14)-98, b(14)-98++, b(15), b(15)++, b(15)-98++, b(16)++, b(16)-98++, b(17), b(17)++, b(17)-98++, b(18)++, b(19)++, b(19)-98++, b(20)++, b(20)-98++, b(21)++, b(21)-98++

**Matched y ions:** y(2), y(3), y(4), y(5), y(6)++, y(6), y(7), y(8)++, y(8), y(9)++, y(9), y(10), y(10)++, y(11)++, y(12)++, y(12), y(13)++, y(14)++, y(17)-98++, y(17)++, y(18)++, y(19)-98++, y(21)++, y(21)-98++

**Precursor origin neutral loss:** +

## Peptide No.36

**AGDVLEDSPK**

**Confirmed sites:** @S:8

**Ambiguous sites:**

**MS/MS Fragmentation of AGDVLEDSPK**

Found in **HDGF\_MOUSE**, Hepatoma-derived growth factor OS=Mus musculus GN=HdGF PE=1 SV=2

Match to Query 1086: 1165.526868 from(583.770710,2+)

Title: Elution from: 28.519 to 28.519 scan no 2100 cid35.00 polarity:+:MA10

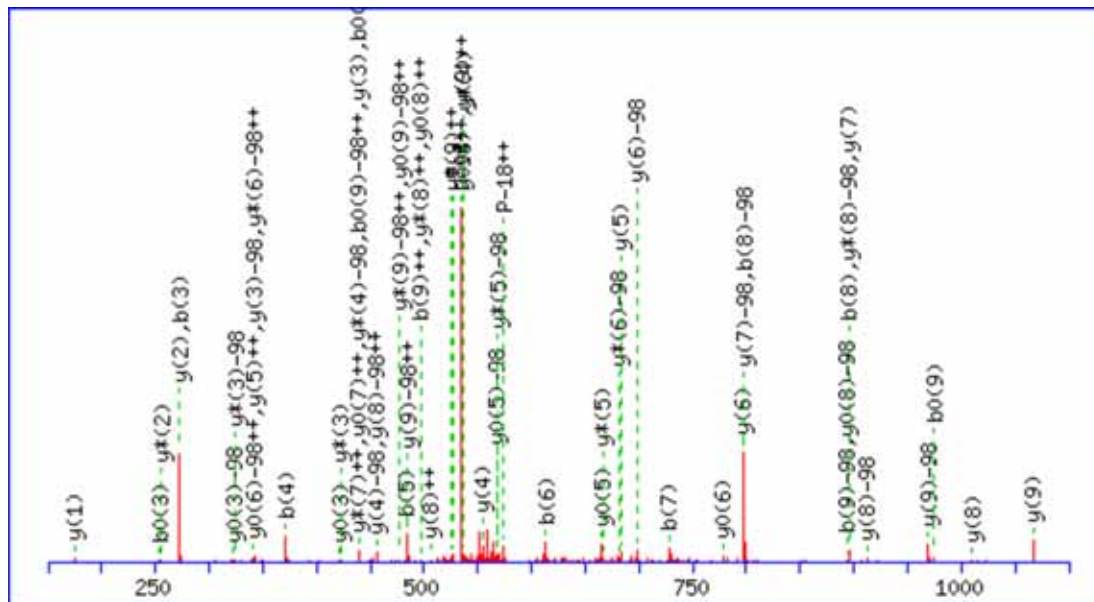

**Monoisotopic mass of neutral peptide Mr(calc):** 1165.5268

**Fixed modifications:** Carbamidomethyl (C) (apply to specified residues or termini only)

**Variable modifications:**

**N-term :** Dimethyl (N-term)

**S8 :** Phospho (ST), with neutral losses 97.9769(shown in table), 0.0000

**K10 :** Dimethyl (K)

**Ions Score:** 58 **Expect:** 3.8e-005

**Matched b ions:** b(3), b(4), b(5), b(6), b(7), b(8)-98, b(8), b(9)-98, b(9)++

**Matched y ions:** y(1), y(2), y(3), y(3)-98, y(4)-98, y(4), y(5)++, y(5), y(6)-98, y(6), y(7)-98, y(7), y(8)-98++, y(8), y(8)-98, y(8)++, y(9)++, y(9)-98, y(9), y(9)-98++

**Precursor origin neutral loss:** +

## Peptide No.37

**AGDVLEDSPKRPK**

**Confirmed sites:** @S:8

**Ambiguous sites:**

**MS/MS Fragmentation of AGDVLEDSPKRPK**

Found in **HDGF\_MOUSE**, Hepatoma-derived growth factor OS=Mus musculus GN=Hdgf PE=1 SV=2

Match to Query 2909: 1574.807304 from(525.943044,3+)

Title: Elution from: 23.937 to 23.937 scan no 1490 cid35.00 polarity:+:MA10

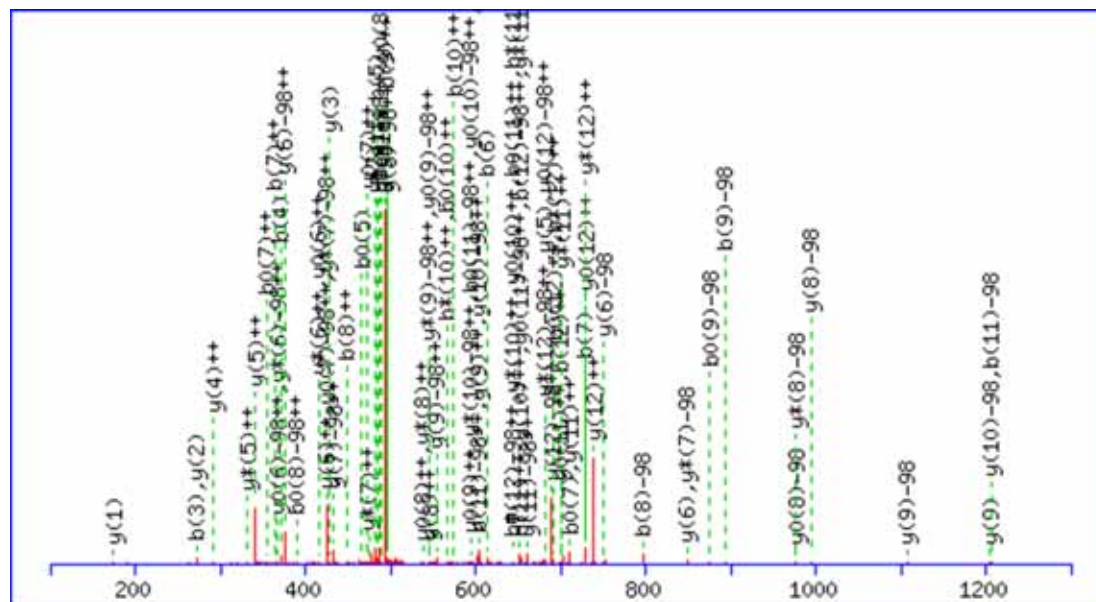

**Monoisotopic mass of neutral peptide Mr(calc):** 1574.8069

**Fixed modifications:** Carbamidomethyl (C) (apply to specified residues or termini only)

**Variable modifications:**

**N-term :** Dimethyl (N-term)

**S8 :** Phospho (ST), with neutral losses 97.9769(shown in table), 0.0000

**K10 :** Dimethyl (K)

**K13 :** Dimethyl (K)

**Ions Score:** 56 **Expect:** 0.00013

**Matched b ions:** b(3), b(4), b(5), b(6), b(7), b(7)++, b(8)-98, b(8)++, b(9)-98, b(9)++, b(10)++, b(11)-98++, b(11)++, b(11)-98, b(12)-98++, b(12)++

**Matched y ions:** y(1), y(2), y(3), y(4)++, y(5)++, y(5), y(6)++, y(6)-98++, y(6), y(6)-98, y(7)++, y(7)-98++, y(8)-98, y(8)-98++, y(8)++, y(9)++, y(9)-98, y(9), y(9)-98++, y(10)-98++, y(10)++, y(10)-98, y(11)-98++, y(11)++, y(12)++, y(12)-98++

**Precursor origin neutral loss:** +

## Peptide No.38

**AGDVLEDSPKRPK**

**Confirmed sites: @S:8**

**Ambiguous sites:**

MS/MS Fragmentation of **AGDVLEDSPKRPK**

Found in **HDGF\_MOUSE**, Hepatoma-derived growth factor OS=Mus musculus GN=HdGF PE=1 SV=2

Match to Query 2603: 1592.903106 from(531.974978,3+)

Title: Elution from: 23.906 to 23.906 scan no 1363 cid35.00 polarity:+:MA10

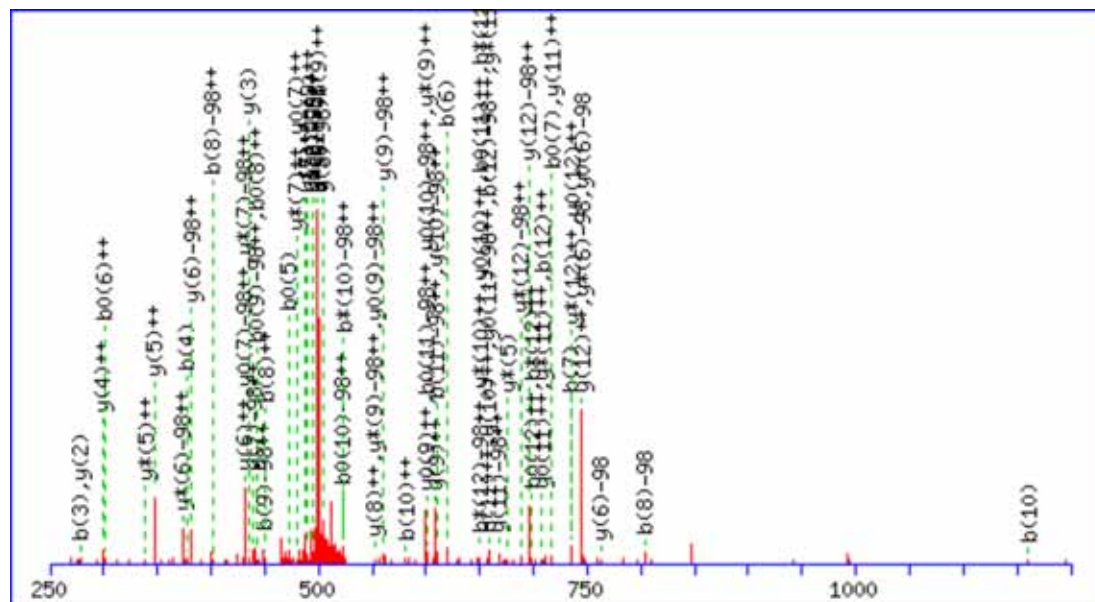

**Monoisotopic mass of neutral peptide Mr(calc):** 1592.9023

**Fixed modifications:** Carbamidomethyl (C) (apply to specified residues or termini only)

**Variable modifications:**

**N-term :** Dimethyl:2H(4)13C(2) (N-term)

**S8 :** Phospho (ST), with neutral losses 97.9769(shown in table), 0.0000

**K10 :** Dimethyl:2H(4)13C(2) (K)

**K13 :** Dimethyl:2H(4)13C(2) (K)

**Ions Score:** 31 **Expect:** 0.028

**Matched b ions:** b(3), b(4), b(5), b(6), b(7), b(8)-98, b(8)-98++, b(8)++, b(9)++, b(9)-98++, b(10), b(10)++, b(11)++, b(11)-98++, b(12)-98++, b(12)++

**Matched y ions:** y(2), y(3), y(4)++, y(5)++, y(6)++, y(6)-98++, y(6)-98, y(7)-98++, y(7)++, y(8)-98++, y(8)++, y(9)-98++, y(9)++, y(10)++, y(10)-98++, y(11)++, y(11)-98++, y(12)++, y(12)-98++

**Precursor origin neutral loss:** +

## Peptide No.39

**AGPSPASSSPVPGGER**

**Confirmed sites:** @S:4,@S:9

**Ambiguous sites:**

**MS/MS Fragmentation of AGPSPASSSPVPGGER**

Found in **SRPK3\_MOUSE**, Serine/threonine-protein kinase SRPK3 OS=Mus musculus GN=Srpk3  
PE=2 SV=1

Match to Query 3362: 1639.664430 from(820.839491,2+)

Title: Elution from: 28.351 to 28.351 scan no 2078 cid35.00 polarity:+:MA10



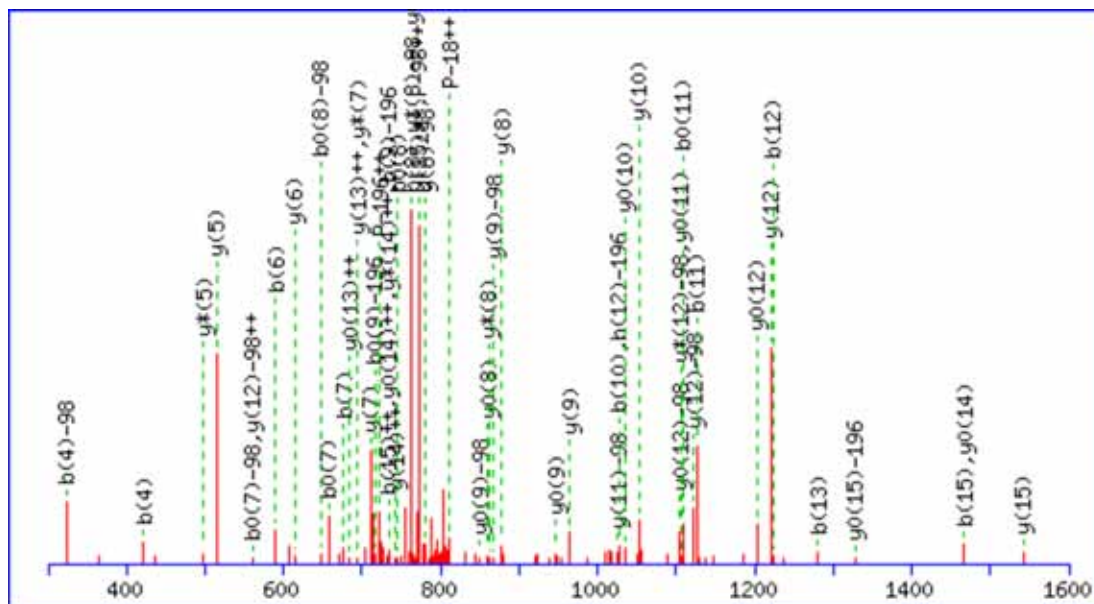

**Monoisotopic mass of neutral peptide Mr(calc):** 1639.6644

**Fixed modifications:** Carbamidomethyl (C) (apply to specified residues or termini only)

**Variable modifications:**

**N-term :** Dimethyl (N-term)

**S4 :** Phospho (ST), with neutral losses 0.0000(shown in table), 97.9769

**S9 :** Phospho (ST), with neutral losses 0.0000(shown in table), 97.9769

**Ions Score:** 51 **Expect:** 0.00018

**Matched b ions:** b(4)-98, b(4), b(6), b(7), b(8), b(9)-98, b(9)-196, b(10), b(11)-98++, b(11), b(11)-98, b(12), b(12)-196, b(13), b(15), b(15)-98++, b(15)++

**Matched y ions:** y(5), y(6), y(7), y(8), y(8)-98, y(9), y(9)-98, y(10), y(11)-98, y(12)-98, y(12), y(12)-98++, y(13)++, y(14)++, y(15), y(15)-98++, y(15)++

**Precursor origin neutral loss:** +

## Peptide No.40

**AGSPQLDDIR**

**Confirmed sites:** @S:3

**Ambiguous sites:**

MS/MS Fragmentation of **AGSPQLDDIR**

Found in **EI2BE\_MOUSE**, Translation initiation factor eIF-2B subunit epsilon OS=Mus musculus  
GN=Eif2b5 PE=1 SV=1

Match to Query 1134: 1178.533948 from(590.274250,2+)

Title: Elution from: 35.473 to 35.473 scan no 3053 cid35.00 polarity:+:MA10

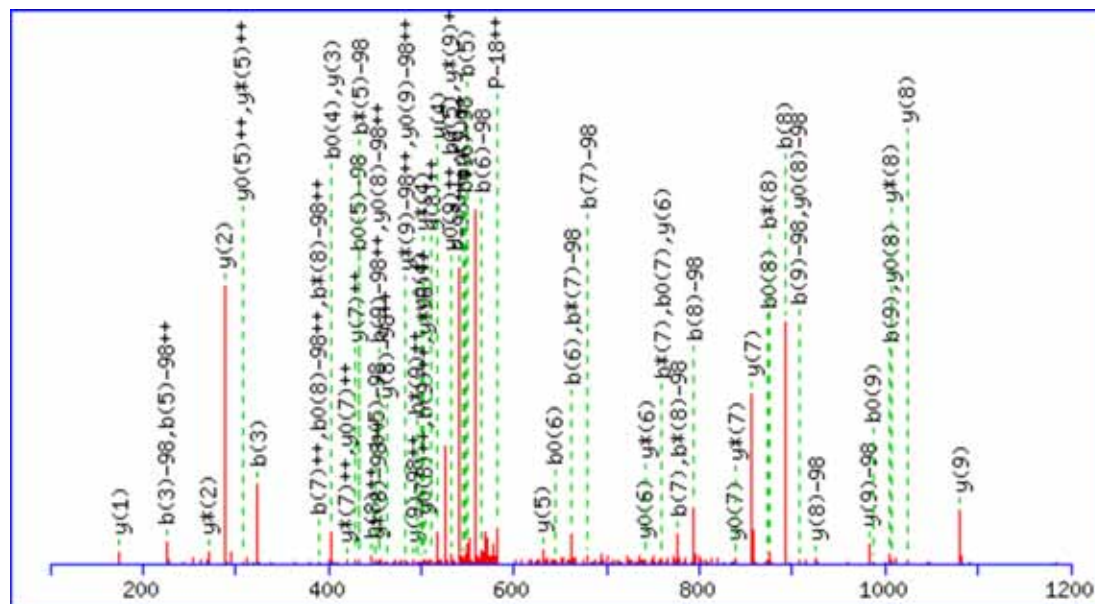

**Monoisotopic mass of neutral peptide Mr(calc):** 1178.5332

**Fixed modifications:** Carbamidomethyl (C) (apply to specified residues or termini only)

**Variable modifications:**

**N-term :** Dimethyl (N-term)

**S3 :** Phospho (ST), with neutral losses 97.9769(shown in table), 0.0000

**Ions Score:** 47 **Expect:** 0.00039

**Matched b ions:** b(3)-98, b(3), b(5)-98++, b(5)-98, b(5), b(6), b(6)-98, b(7)-98, b(7), b(7)++, b(8), b(8)++, b(8)-98, b(9), b(9)-98, b(9)-98++, b(9)++

**Matched y ions:** y(1), y(2), y(3), y(4), y(5), y(6), y(7), y(7)++, y(8)-98, y(8), y(8)-98++, y(8)++, y(9)-98, y(9), y(9)++, y(9)-98++

**Precursor origin neutral loss:** +

## Peptide No.41

**AISDELDHALNDMTSI**

**Confirmed sites:** @S:15

**Ambiguous sites:**

**MS/MS Fragmentation of AISDELDHALNDMTSI**

Found in **TPM3\_MOUSE**, Tropomyosin alpha-3 chain OS=Mus musculus GN=Tpm3 PE=1 SV=2

Match to Query 3823: 1867.792852 from(934.903702,2+)

Title: Elution from: 57.570 to 57.570 scan no 5252 cid35.00 polarity:+:MA10

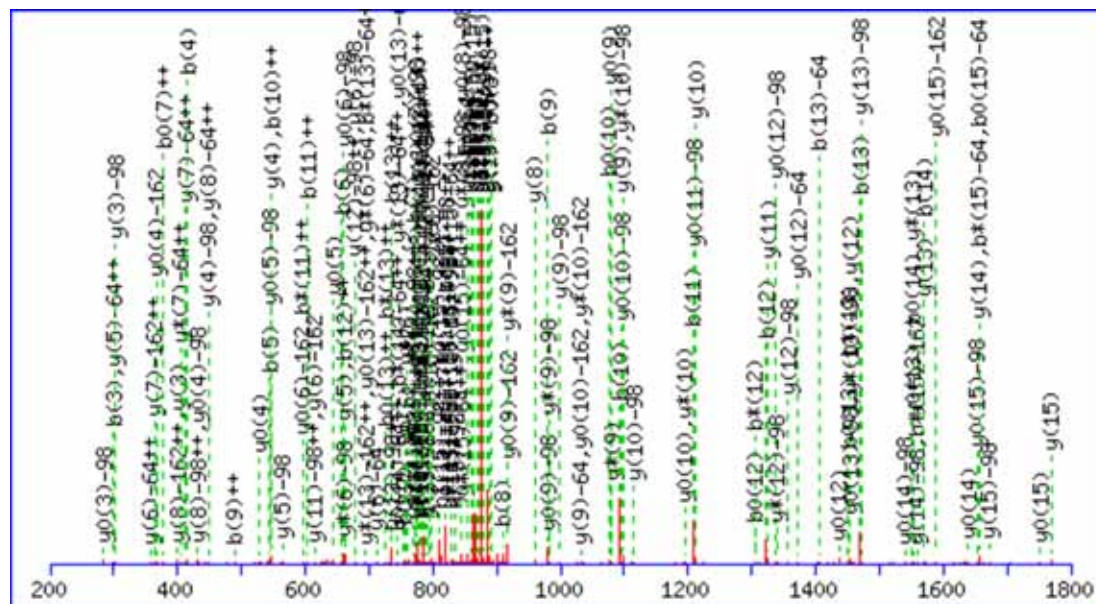

**Monoisotopic mass of neutral peptide Mr(calc):** 1867.7910

**Fixed modifications:** Carbamidomethyl (C) (apply to specified residues or termini only)

**Variable modifications:**

**N-term :** Dimethyl (N-term)

**M13 :** Oxidation (M), with neutral losses 0.0000(shown in table), 63.9983

**S15 :** Phospho (ST), with neutral losses 0.0000(shown in table), 97.9769

**Ions Score:** 88 **Expect:** 5.5e-008

**Matched b ions:** b(3), b(4), b(5), b(6), b(7), b(8), b(9), b(9)++, b(10), b(10)++, b(11), b(11)++, b(12), b(12)++, b(13), b(13)++, b(14), b(14)++, b(15)-98++, b(15)++

**Matched y ions:** y(3), y(3)-98, y(4), y(4)-98, y(5), y(5)-98, y(6), y(6)-98, y(7), y(7)-98, y(8)-98, y(8)-98, y(9), y(9)-98, y(10), y(10)-98, y(11), y(11)-98, y(11)-98, y(12), y(12)-98, y(12)-98, y(12)-98, y(13), y(13)++, y(13)-98, y(13)-98, y(14), y(14)-98, y(14)-98, y(14)++, y(15)++, y(15), y(15)-98, y(15)-98

**Precursor origin neutral loss:** +

## Peptide No.42

**AISDELDPHALNDMTSI**

**Confirmed sites:** @S:15

**Ambiguous sites:**

**MS/MS Fragmentation of AISDELDPHALNDMTSI**

Found in **TPM3\_MOUSE**, Tropomyosin alpha-3 chain OS=Mus musculus GN=Tpm3 PE=1 SV=2

Match to Query 4691: 1851.796798 from(926.905675,2+)

Title: Elution from: 67.381 to 67.381 scan no 6535 cid35.00 polarity:+:MA10

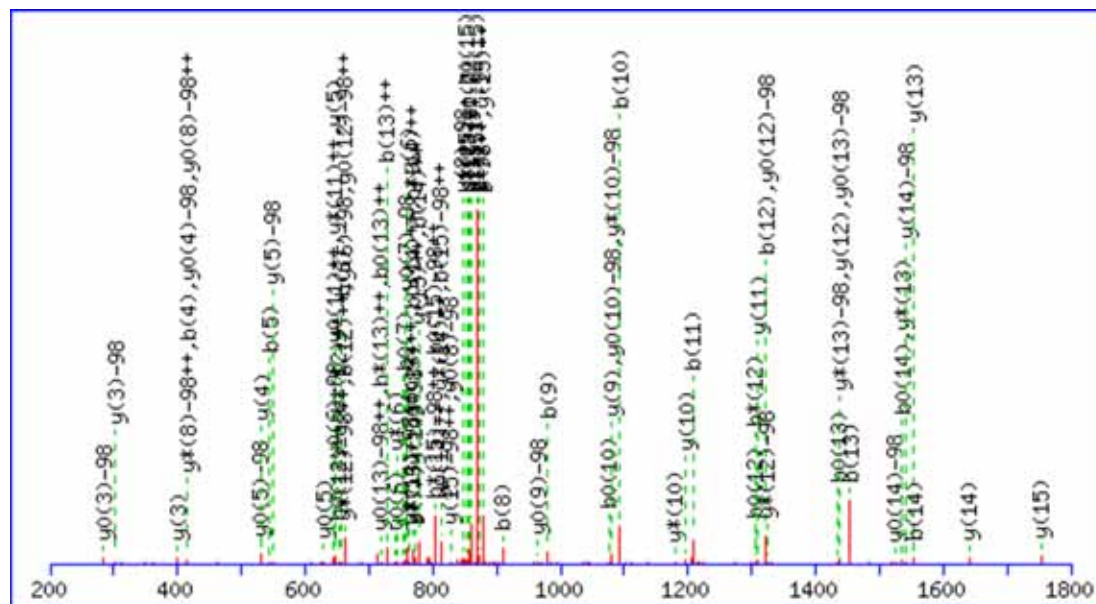

**Monoisotopic mass of neutral peptide Mr(calc):** 1851.7961

**Fixed modifications:** Carbamidomethyl (C) (apply to specified residues or termini only)

**Variable modifications:**

**N-term :** Dimethyl (N-term)

**S15 :** Phospho (ST), with neutral losses 0.0000(shown in table), 97.9769

**Ions Score:** 99 **Expect:** 5.2e-009

**Matched b ions:** b(4), b(5), b(6), b(7), b(8), b(9), b(10), b(11), b(12)++, b(12), b(13), b(13)++, b(14)++, b(14), b(15)-98++, b(15)++

**Matched y ions:** y(3), y(3)-98, y(4), y(5), y(5)-98, y(6)-98, y(6), y(7), y(8)-98, y(9), y(10), y(11), y(12), y(13)++, y(13), y(14), y(14)-98, y(14)-98++, y(15), y(15)++, y(15)-98++

**Precursor origin neutral loss:** +

## Peptide No.43

**AISDELDHALNDMTSI**

**Confirmed sites:** @T:14

**Ambiguous sites:**

**MS/MS Fragmentation of AISDELDHALNDMTSI**

Found in **TPM3\_MOUSE**, Tropomyosin alpha-3 chain OS=Mus musculus GN=Tpm3 PE=1 SV=2

Match to Query 3998: 1851.796413 from(618.272747,3+)

Title: Elution from: 67.170 to 67.170 scan no 6306 cid35.00 polarity:+:MA10



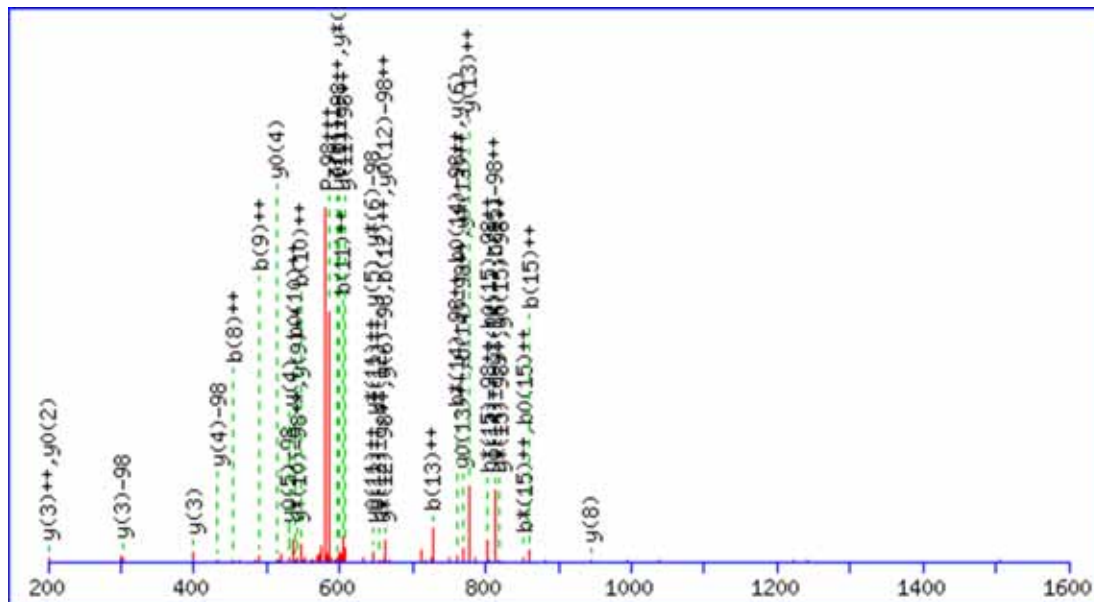

**Monoisotopic mass of neutral peptide Mr(calc):** 1851.7961

**Fixed modifications:** Carbamidomethyl (C) (apply to specified residues or termini only)

**Variable modifications:**

**N-term :** Dimethyl (N-term)

**T14 :** Phospho (ST), with neutral losses 97.9769(shown in table), 0.0000

**Ions Score:** 36 **Expect:** 0.011

**Matched b ions:** b(8)++, b(9)++, b(10)++, b(11)++, b(12)++, b(13)++, b(14)-98++, b(15)-98++, b(15)++

**Matched y ions:** y(3), y(3)++, y(3)-98, y(4)-98, y(4), y(5), y(6)-98, y(6), y(8), y(9)++, y(10)++, y(11)-98++, y(13)++

**Precursor origin neutral loss:** +

## Peptide No.44

**AISDELDHALNDMTSI**

**Confirmed sites:** @S:15

**Ambiguous sites:**

**MS/MS Fragmentation of AISDELDHALNDMTSI**

Found in **TPM3\_MOUSE**, Tropomyosin alpha-3 chain OS=Mus musculus GN=Tpm3 PE=1 SV=2

Match to Query 3588: 1873.823372 from(937.918962,2+)

Title: Elution from: 57.677 to 57.677 scan no 5365 cid35.00 polarity:+:MA10

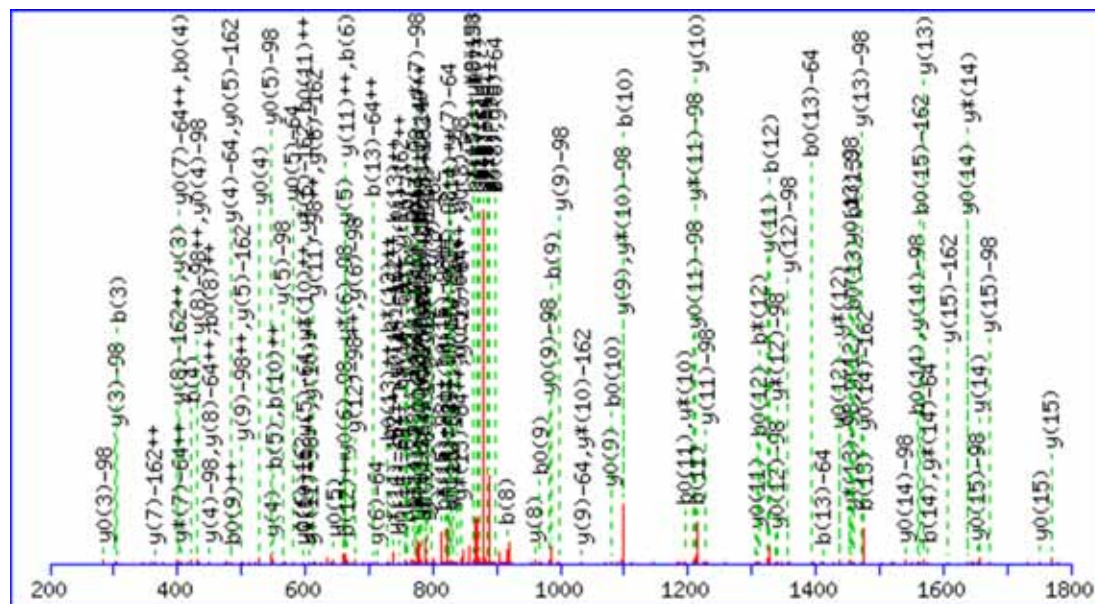

**Monoisotopic mass of neutral peptide Mr(calc):** 1873.8229

**Fixed modifications:** Carbamidomethyl (C) (apply to specified residues or termini only)

**Variable modifications:**

**N-term :** Dimethyl:2H(4)13C(2) (N-term)

**M13 :** Oxidation (M), with neutral losses 0.0000(shown in table), 63.9983

**S15 :** Phospho (ST), with neutral losses 0.0000(shown in table), 97.9769

**Ions Score:** 87 **Expect:** 8.7e-008

**Matched b ions:** b(3), b(4), b(5), b(6), b(7), b(8), b(9), b(10), b(10)++, b(11), b(12), b(12)++, b(13), b(13)++, b(14), b(14)++, b(15)-98++, b(15)++

**Matched y ions:** y(3), y(3)-98, y(4), y(4)-98, y(5), y(5)-98, y(6), y(6)-98, y(7), y(7)-98, y(8)-98, y(8)-98, y(9), y(9)-98, y(9)-98, y(10), y(10)++, y(11), y(11)++, y(11)-98, y(11)-98, y(12), y(12)-98, y(12)-98, y(13), y(13)-98, y(14), y(14)-98, y(14)-98, y(14)++, y(15), y(15)-98, y(15)++

**Precursor origin neutral loss:** +

## Peptide No.45

**AISDELDHALNDMTSI**

**Confirmed sites:** @T:14

**Ambiguous sites:**

**MS/MS Fragmentation of AISDELDHALNDMTSI**

Found in **TPM3\_MOUSE**, Tropomyosin alpha-3 chain OS=Mus musculus GN=Tpm3 PE=1 SV=2

Match to Query 4218: 1873.822996 from(937.918774,2+)

Title: Elution from: 57.944 to 57.944 scan no 5517 cid35.00 polarity:+:MA10:m1s

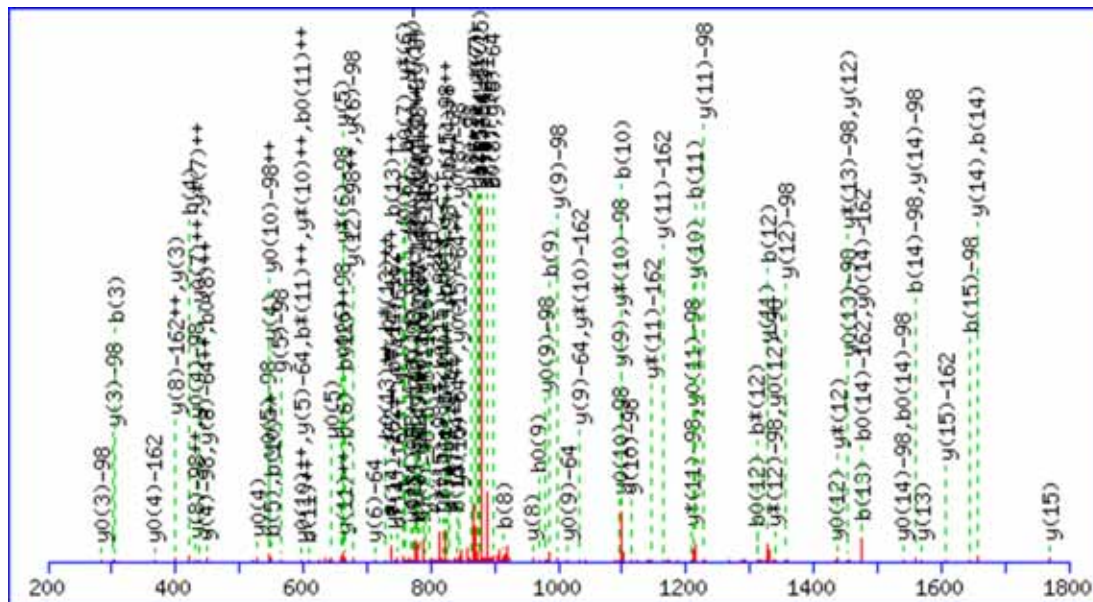

**Monoisotopic mass of neutral peptide Mr(calc):** 1873.8229

**Fixed modifications:** Carbamidomethyl (C) (apply to specified residues or termini only)

**Variable modifications:**

**N-term :** Dimethyl:2H(4)13C(2) (N-term)

**M13 :** Oxidation (M), with neutral losses 0.0000(shown in table), 63.9983

**T14 :** Phospho (ST), with neutral losses 97.9769(shown in table), 0.0000

**Ions Score:** 81 **Expect:** 3.8e-007

**Matched b ions:** b(3), b(4), b(5), b(6), b(7), b(8), b(9), b(10), b(10)++, b(11), b(11)++, b(12), b(12)++, b(13), b(13)++, b(14)-98, b(14), b(14)-98++, b(14)++, b(15)-98++, b(15)-98, b(15)++

**Matched y ions:** y(3), y(3)-98, y(4), y(4)-98, y(5), y(5)-98, y(6), y(6)-98, y(7), y(7)-98, y(8)-98++, y(8)-98, y(8), y(9), y(9)-98, y(10), y(10)-98, y(11), y(11)++, y(11)-98, y(12)-98++, y(12), y(12)-98, y(13), y(14)-98, y(14), y(14)-98++, y(14)++, y(15)

**Precursor origin neutral loss:** +

## Peptide No.46

**AISDELDHALNDMTSI**

**Confirmed sites:** @S:15

**Ambiguous sites:**

**MS/MS Fragmentation of AISDELDHALNDMTSI**

Found in **TPM3\_MOUSE**, Tropomyosin alpha-3 chain OS=Mus musculus GN=Tpm3 PE=1 SV=2

Match to Query 5416: 1857.828868 from(929.921710,2+)

Title: Elution from: 67.391 to 67.391 scan no 6668 cid35.00 polarity:+:MA10

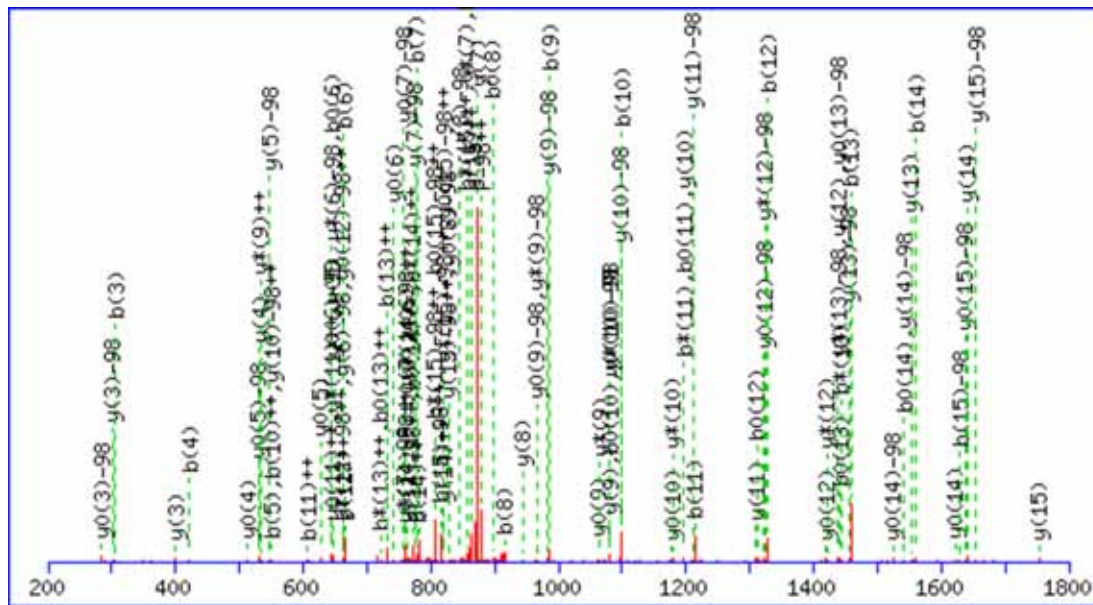

**Monoisotopic mass of neutral peptide Mr(calc):** 1857.8279

**Fixed modifications:** Carbamidomethyl (C) (apply to specified residues or termini only)

**Variable modifications:**

**N-term :** Dimethyl:2H(4)13C(2) (N-term)

**S15 :** Phospho (ST), with neutral losses 97.9769(shown in table), 0.0000

**Ions Score:** 92 **Expect:** 2.9e-008

**Matched b ions:** b(3), b(4), b(5), b(6), b(7), b(8), b(9), b(10), b(10)++, b(11), b(11)++, b(12)++, b(12), b(13), b(13)++, b(14)++, b(14), b(15)-98++, b(15)-98, b(15)++

**Matched y ions:** y(3), y(3)-98, y(4), y(5), y(5)-98, y(6), y(6)-98, y(7), y(7)-98, y(8)-98, y(8), y(9), y(9)-98, y(10)-98, y(10), y(10)-98++, y(11), y(11)-98, y(12), y(13), y(13)-98, y(14), y(14)-98++, y(14)-98, y(14)++, y(15), y(15)-98, y(15)-98++

**Precursor origin neutral loss:** +

## Peptide No.47

**AISEELDHALNDMTSI**

**Confirmed sites:** @S:15

**Ambiguous sites:**

**MS/MS Fragmentation of AISEELDHALNDMTSI**

Found in **TPM1\_MOUSE**, Tropomyosin alpha-1 chain OS=Mus musculus GN=Tpm1 PE=1 SV=1

Match to Query 4703: 1853.776852 from(927.895702,2+)

Title: Elution from: 59.038 to 59.038 scan no 5853 cid35.00 polarity:+:MA10



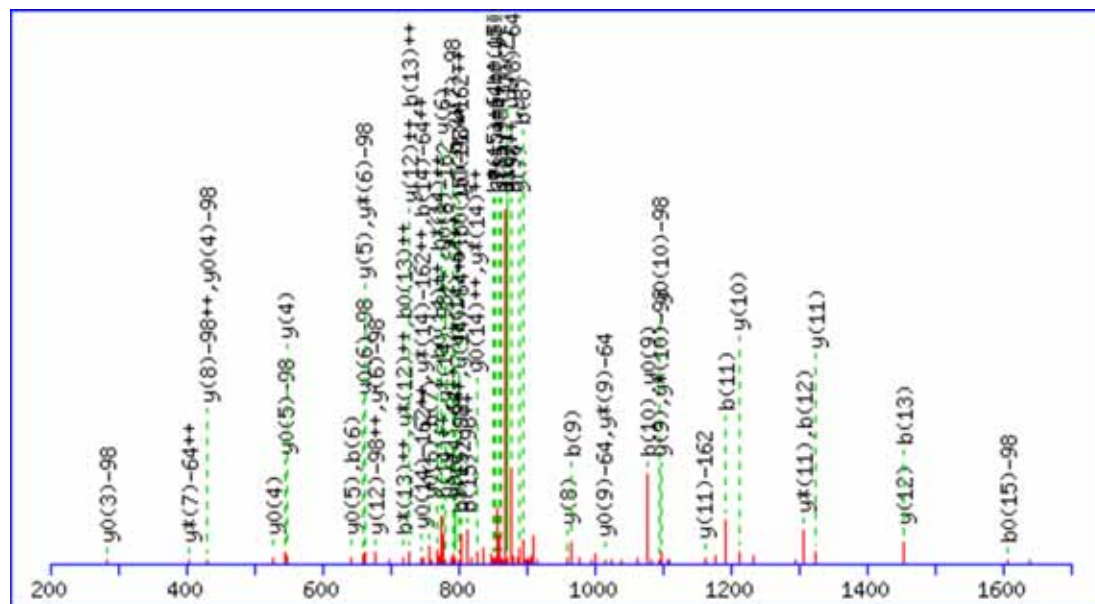

**Monoisotopic mass of neutral peptide Mr(calc):** 1853.7754

**Fixed modifications:** Carbamidomethyl (C) (apply to specified residues or termini only)

**Variable modifications:**

**M13 :** Oxidation (M), with neutral losses 0.0000(shown in table), 63.9983

**S15 :** Phospho (ST), with neutral losses 0.0000(shown in table), 97.9769

**Ions Score:** 42 **Expect:** 0.0025

**Matched b ions:** b(6), b(7), b(8), b(9), b(10), b(11), b(12), b(13), b(13)++, b(14)++, b(15)-98++, b(15)++

**Matched y ions:** y(4), y(5), y(6)-98, y(6), y(7), y(7)-98, y(8)-98++, y(8)-98, y(8), y(9), y(10), y(11), y(12)-98++, y(12), y(12)++

**Precursor origin neutral loss:** +

## Peptide No.48

**AISEELDHALNDMTSI**

**Confirmed sites:** @S:15

**Ambiguous sites:**

**MS/MS Fragmentation of AISEELDHALNDMTSI**

Found in **TPM1\_MOUSE**, Tropomyosin alpha-1 chain OS=Mus musculus GN=Tpm1 PE=1 SV=1

Match to Query 5713: 1881.808188 from(941.911370,2+)

Title: Elution from: 55.938 to 55.938 scan no 5592 cid35.00 polarity:+:MA10

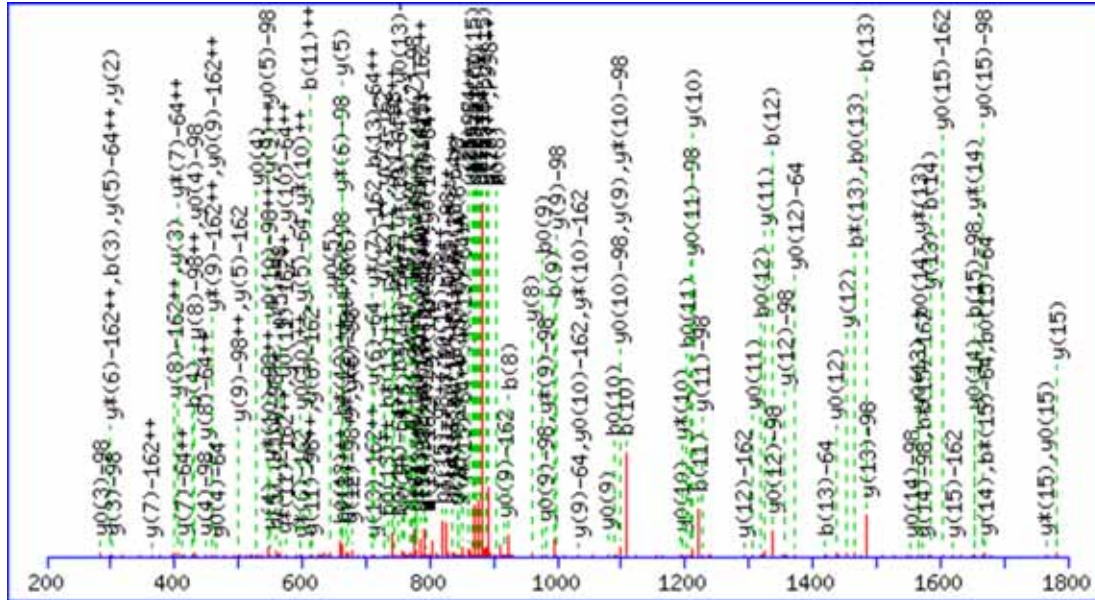

**Monoisotopic mass of neutral peptide Mr(calc):** 1881.8067

**Fixed modifications:** Carbamidomethyl (C) (apply to specified residues or termini only)

**Variable modifications:**

**N-term :** Dimethyl (N-term)

**M13 :** Oxidation (M), with neutral losses 0.0000(shown in table), 63.9983

**S15 :** Phospho (ST), with neutral losses 0.0000(shown in table), 97.9769

**Ions Score:** 88 **Expect:** 8e-008

**Matched b ions:** b(3), b(4), b(5), b(6), b(7), b(8), b(9), b(10), b(11), b(11)++, b(12), b(12)++, b(13), b(13)++, b(14), b(14)++, b(15)-98++, b(15)-98, b(15)++

**Matched y ions:** y(2), y(3), y(3)-98, y(4), y(4)-98, y(5), y(5)-98, y(6), y(6)-98, y(7), y(7)-98, y(8)-98++, y(8), y(8)-98, y(9), y(9)-98, y(9)++, y(9)-98++, y(10)-98++, y(10), y(11), y(11)-98++, y(11)-98, y(12)-98++, y(12), y(12)++, y(12)-98, y(13), y(13)++, y(13)-98, y(13)-98++, y(14)-98, y(14), y(14)-98++, y(14)++, y(15)++, y(15), y(15)-98++

**Precursor origin neutral loss:** +

## Peptide No.49

**AISEELDHALNDMTSI**

**Confirmed sites:** @T:14

**Ambiguous sites:**

**MS/MS Fragmentation of** **AISEELDHALNDMTSI**

**Found in** **TPM1\_MOUSE**, Tropomyosin alpha-1 chain OS=Mus musculus GN=Tpm1 PE=1 SV=1

**Match to Query** 3970: 1881.810788 from(941.912670,2+)

**Title:** Elution from: 81.186 to 81.186 scan no 7225 cid35.00 polarity:+:MA10:m1s

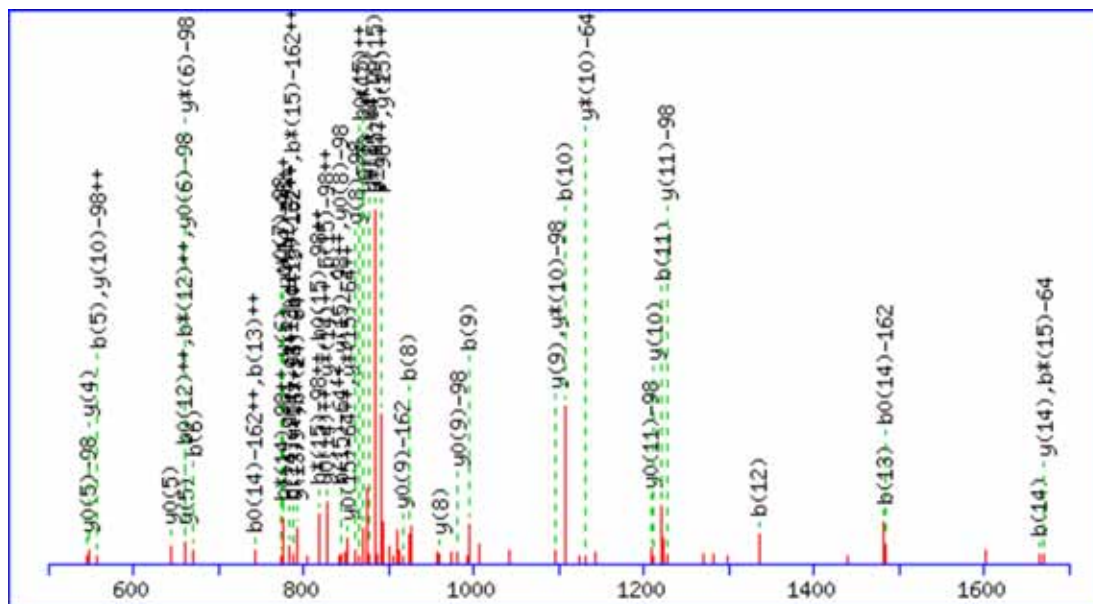

**Monoisotopic mass of neutral peptide Mr(calc):** 1881.8067

**Fixed modifications:** Carbamidomethyl (C) (apply to specified residues or termini only)

**Variable modifications:**

**N-term :** Dimethyl (N-term)

**M13 :** Oxidation (M), with neutral losses 0.0000(shown in table), 63.9983

**T14 :** Phospho (ST), with neutral losses 0.0000(shown in table), 97.9769

**Ions Score:** 43 **Expect:** 0.0025

**Matched b ions:** b(5), b(6), b(7), b(8), b(9), b(10), b(11), b(12), b(13), b(13)++, b(14), b(14)-98++, b(15)-98++

**Matched y ions:** y(4), y(5), y(6), y(8), y(8)-98, y(9), y(10)-98++, y(10), y(11)-98, y(13)++, y(14), y(14)-98++, y(15)++, y(15)-98++

**Precursor origin neutral loss:** +

## Peptide No.50

**AISEELDHALNDMTSI**

**Confirmed sites:** @S:15

**Ambiguous sites:**

MS/MS Fragmentation of **AISEELDHALNDMTSI**

Found in **TPM1\_MOUSE**, Tropomyosin alpha-1 chain OS=Mus musculus GN=Tpm1 PE=1 SV=1

Match to Query 5493: 1865.813482 from(933.914017,2+)

Title: Elution from: 65.326 to 65.326 scan no 6484 cid35.00 polarity:+:MA10

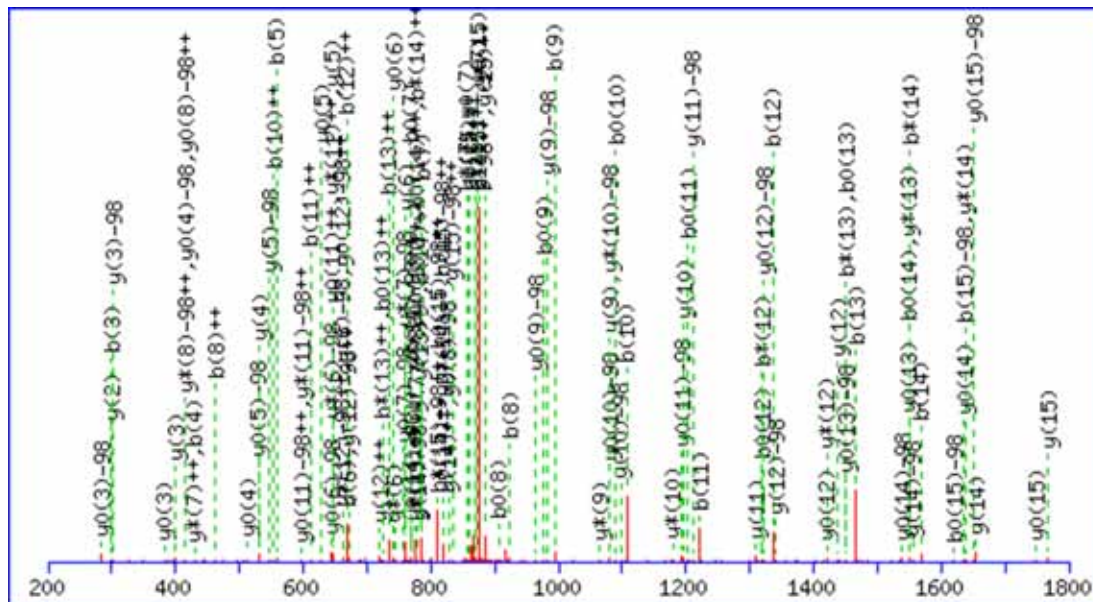

**Monoisotopic mass of neutral peptide Mr(calc):** 1865.8118

**Fixed modifications:** Carbamidomethyl (C) (apply to specified residues or termini only)

**Variable modifications:**

**N-term :** Dimethyl (N-term)

**S15 :** Phospho (ST), with neutral losses 97.9769(shown in table), 0.0000

**Ions Score:** 89 **Expect:** 5.8e-008

**Matched b ions:** b(3), b(4), b(5), b(6), b(7), b(8), b(8)++, b(9), b(10), b(10)++, b(11), b(11)++, b(12)++, b(12), b(13)++, b(13), b(14), b(14)++, b(15)-98, b(15)-98++, b(15)++

**Matched y ions:** y(2), y(3), y(3)-98, y(4), y(5), y(5)-98, y(6), y(6)-98, y(7)-98, y(7), y(9), y(9)-98, y(10)-98, y(10), y(11), y(11)-98, y(12)++, y(12)-98++, y(12), y(12)-98, y(13)++, y(14), y(14)-98, y(14)-98++, y(14)++, y(15)++, y(15), y(15)-98++

**Precursor origin neutral loss:** +

## Peptide No.51

**AISEELDHALNDMTSI**

**Confirmed sites:** @S:15

**Ambiguous sites:**

MS/MS Fragmentation of **AISEELDHALNDMTSI**

Found in **TPM1\_MOUSE**, Tropomyosin alpha-1 chain OS=Mus musculus GN=Tpm1 PE=1 SV=1

Match to Query 4108: 1887.839806 from(944.927179,2+)

Title: Elution from: 56.310 to 56.310 scan no 5306 cid35.00 polarity:+:MA10



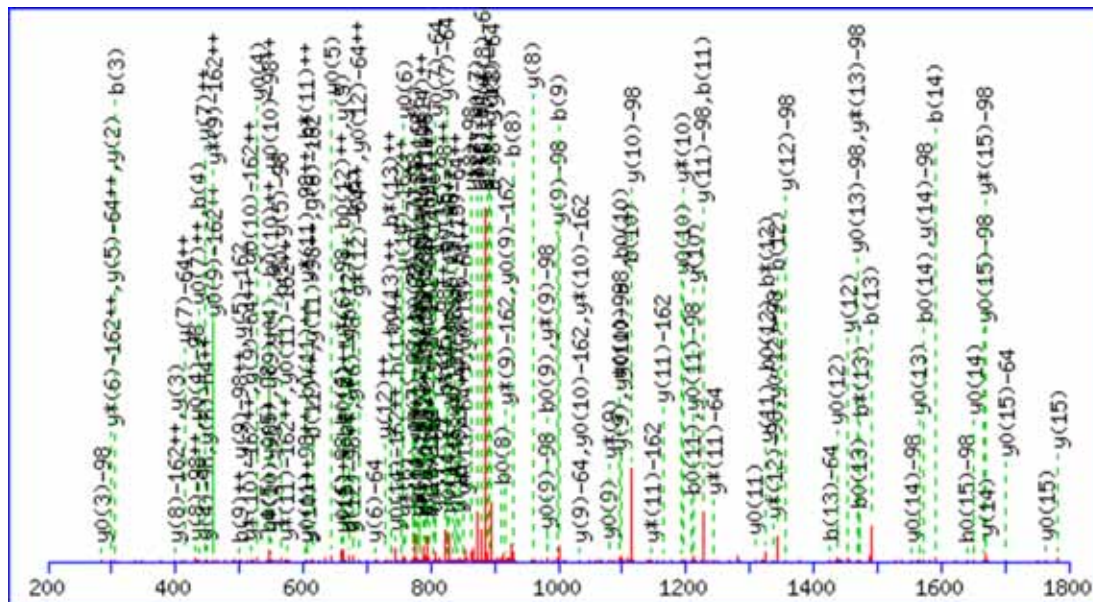

**Monoisotopic mass of neutral peptide Mr(calc):** 1887.8385

**Fixed modifications:** Carbamidomethyl (C) (apply to specified residues or termini only)

**Variable modifications:**

**N-term :** Dimethyl:2H(4)13C(2) (N-term)

**M13 :** Oxidation (M), with neutral losses 0.0000(shown in table), 63.9983

**S15 :** Phospho (ST), with neutral losses 0.0000(shown in table), 97.9769

**Ions Score:** 78 **Expect:** 7.9e-007

**Matched b ions:** b(3), b(4), b(5), b(6), b(7), b(8), b(9), b(9)++, b(10), b(11), b(11)++, b(12), b(12)++, b(13), b(13)++, b(14), b(14)++, b(15)-98++, b(15)++

**Matched y ions:** y(2), y(3), y(4), y(4)-98, y(5), y(5)-98, y(6), y(6)-98, y(7), y(7)++, y(7)-98, y(8)-98++, y(8)-98, y(9)-98, y(9), y(9)-98++, y(9)++, y(10), y(10)++, y(10)-98, y(11)-98, y(11), y(11)-98++, y(11)++, y(12), y(12)-98, y(12)-98++, y(12)++, y(13)++, y(14), y(14)-98, y(14)-98++, y(14)++, y(15), y(15)-98++, y(15)++

**Precursor origin neutral loss:** +

## Peptide No.52

**AISEELDHALNDMTSI**

**Confirmed sites:** @T:14

**Ambiguous sites:**

MS/MS Fragmentation of **AISEELDHALNDMTSI**

Found in **TPM1\_MOUSE**, Tropomyosin alpha-1 chain OS=Mus musculus GN=Tpm1 PE=1 SV=1

Match to Query 4270: 1887.839582 from(944.927067,2+)

Title: Elution from: 55.646 to 55.646 scan no 5257 cid35.00 polarity:+:MA10



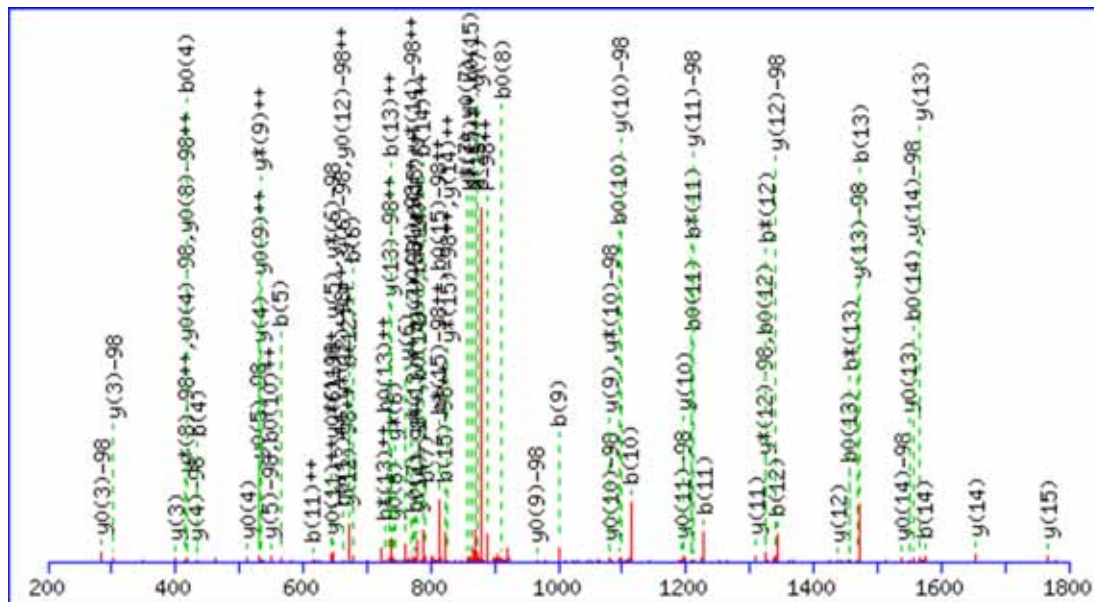

**Monoisotopic mass of neutral peptide Mr(calc):** 1871.8436

**Fixed modifications:** Carbamidomethyl (C) (apply to specified residues or termini only)

**Variable modifications:**

**N-term :** Dimethyl:2H(4)13C(2) (N-term)

**S15 :** Phospho (ST), with neutral losses 0.0000(shown in table), 97.9769

**Ions Score:** 72 **Expect:** 2.9e-006

**Matched b ions:** b(4), b(5), b(6), b(7), b(9), b(10), b(11), b(11)++, b(12)++, b(12), b(13)++, b(13), b(14), b(14)++, b(15)-98++, b(15)++

**Matched y ions:** y(3), y(3)-98, y(4), y(4)-98, y(5)-98, y(5), y(6), y(6)-98, y(7)-98, y(7), y(9), y(10), y(10)-98, y(11), y(11)-98, y(12), y(12)-98++, y(12)-98, y(13), y(13)-98++, y(13)-98, y(14), y(14)-98++, y(14)-98, y(14)++, y(15)

**Precursor origin neutral loss:**

## Peptide No.54

**AISEELDHALNDMTSI**

**Confirmed sites:** @S:15

**Ambiguous sites:**

MS/MS Fragmentation of **AISEELDHALNDMTSI**

Found in **TPM1\_MOUSE**, Tropomyosin alpha-1 chain OS=Mus musculus GN=Tpm1 PE=1 SV=1

Match to Query 3258: 1837.783732 from(919.899142,2+)

Title: Elution from: 68.516 to 68.516 scan no 6265 cid35.00 polarity:+:MA10:m1s

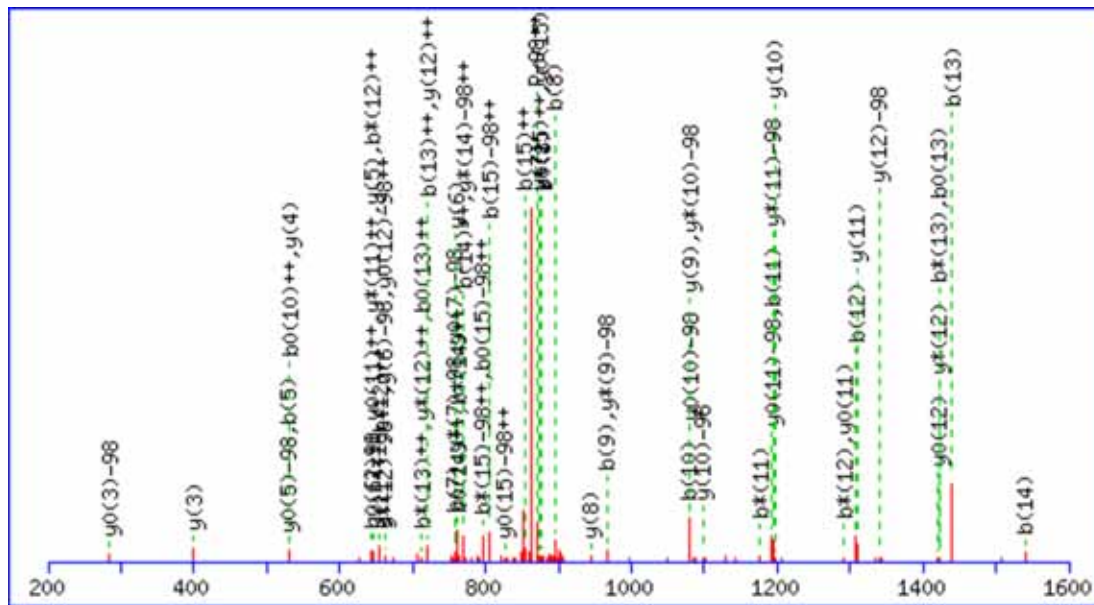

**Monoisotopic mass of neutral peptide Mr(calc):** 1837.7805

**Fixed modifications:** Carbamidomethyl (C) (apply to specified residues or termini only)

**Variable modifications:**

**S15 :** Phospho (ST), with neutral losses 97.9769(shown in table), 0.0000

**Ions Score:** 54 **Expect:** 0.00013

**Matched b ions:** b(5), b(7), b(8), b(9), b(10), b(11), b(12)++, b(12), b(13), b(13)++, b(14), b(14)++, b(15)-98++, b(15)++

**Matched y ions:** y(3), y(4), y(5), y(6), y(6)-98, y(7), y(8), y(9), y(10), y(10)-98, y(11)++, y(11), y(12)++, y(12)-98

**Precursor origin neutral loss:** +

## Peptide No.55

**AISEELDNALNDITSL**

**Confirmed sites:** @S:15

**Ambiguous sites:**

**MS/MS Fragmentation of** **AISEELDNALNDITSL**

Found in **TPM2\_MOUSE**, Tropomyosin beta chain OS=Mus musculus GN=Tpm2 PE=1 SV=1

Match to Query 3581: 1824.841560 from(913.428056,2+)

Title: Elution from: 67.695 to 67.695 scan no 6329 cid35.00 polarity:+:MA10:m1s



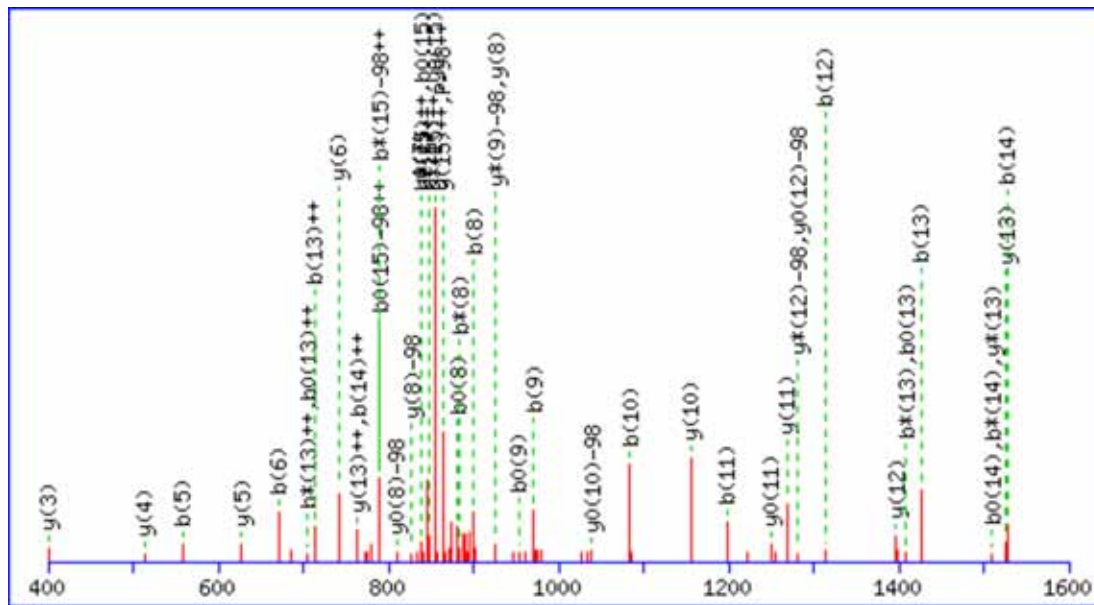

**Monoisotopic mass of neutral peptide Mr(calc):** 1824.8394

**Fixed modifications:** Carbamidomethyl (C) (apply to specified residues or termini only)

**Variable modifications:**

**N-term :** Dimethyl (N-term)

**S15 :** Phospho (ST), with neutral losses 0.0000(shown in table), 97.9769

**Ions Score:** 92 **Expect:** 3.4e-008

**Matched b ions:** b(5), b(6), b(8), b(9), b(10), b(11), b(12), b(13), b(13)++, b(14), b(14)++, b(15)++

**Matched y ions:** y(3), y(4), y(5), y(6), y(7), y(8), y(8)-98, y(10), y(11), y(12), y(13), y(13)++, y(15)++

**Precursor origin neutral loss:** +

## Peptide No.56

**AISEELDNALNDITSL**

**Confirmed sites:** @S:15

**Ambiguous sites:**

**MS/MS Fragmentation of AISEELDNALNDITSL**

Found in **TPM2\_MOUSE**, Tropomyosin beta chain OS=Mus musculus GN=Tpm2 PE=1 SV=1

Match to Query 3859: 1830.872790 from(916.443671,2+)

Title: Elution from: 75.687 to 75.687 scan no 6935 cid35.00 polarity:+:MA10:m1s

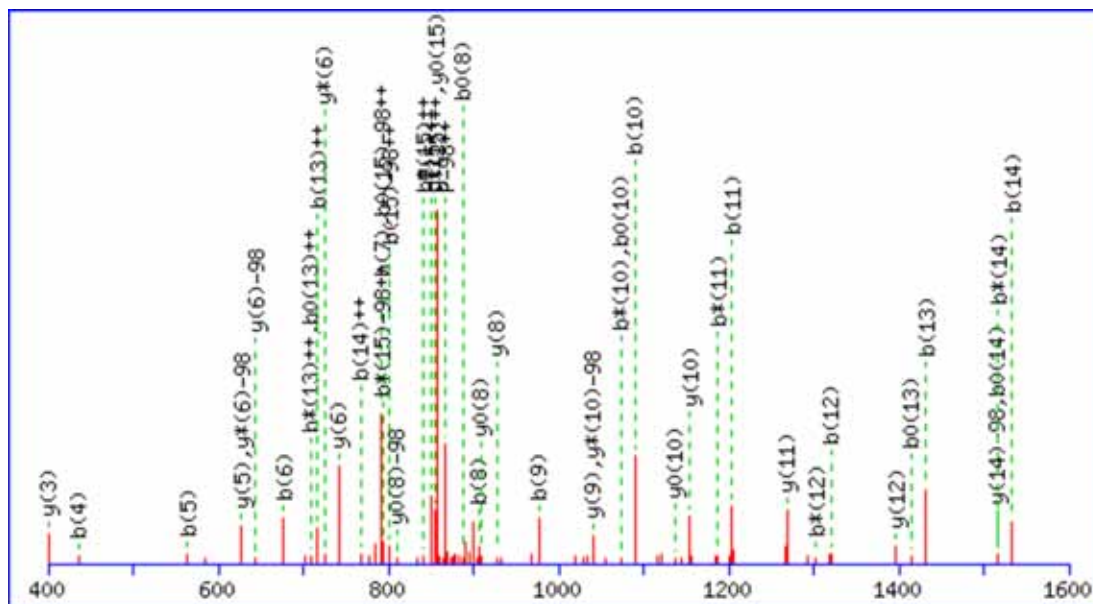

**Monoisotopic mass of neutral peptide Mr(calc):** 1830.8712

**Fixed modifications:** Carbamidomethyl (C) (apply to specified residues or termini only)

**Variable modifications:**

**N-term :** Dimethyl:2H(4)13C(2) (N-term)

**S15 :** Phospho (ST), with neutral losses 0.0000(shown in table), 97.9769

**Ions Score:** 84 **Expect:** 2.6e-007

**Matched b ions:** b(4), b(5), b(6), b(7), b(8), b(9), b(10), b(11), b(12), b(13), b(13)++, b(14), b(14)++, b(15)++, b(15)-98++

**Matched y ions:** y(3), y(5), y(6), y(6)-98, y(7), y(8), y(9), y(10), y(11), y(12), y(14)-98

**Precursor origin neutral loss:** +

## Peptide No.57

**AKPAAQSEEETATSPAASPTPQSAER**

**Confirmed sites:** @S:14,@S:18

**Ambiguous sites:**

**MS/MS Fragmentation of** **AKPAAQSEEETATSPAASPTPQSAER**

Found in **EIF3B\_MOUSE**, Eukaryotic translation initiation factor 3 subunit B OS=Mus musculus  
GN=Eif3b PE=1 SV=1

Match to Query 8345: 2827.232226 from(943.418018,3+)

Title: Elution from: 26.740 to 26.740 scan no 1857 cid35.00 polarity:+:MA10:m1s

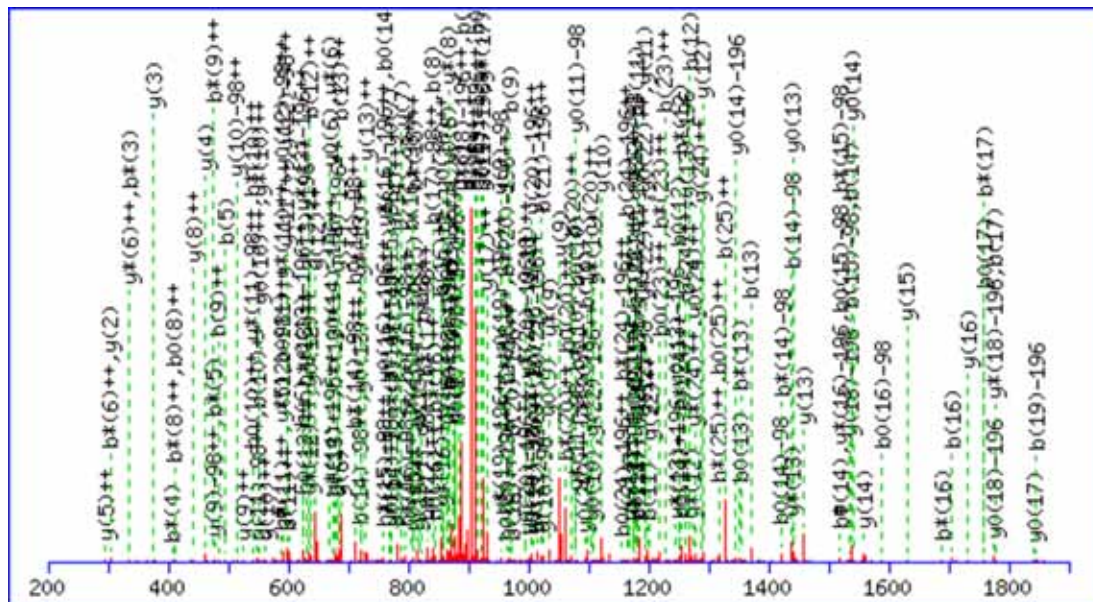

**Monoisotopic mass of neutral peptide Mr(calc):** 2827.2314

**Fixed modifications:** Carbamidomethyl (C) (apply to specified residues or termini only)

**Variable modifications:**

**N-term :** Dimethyl (N-term)

**K2 :** Dimethyl (K)

**S14 :** Phospho (ST), with neutral losses 0.0000(shown in table), 97.9769

**S18 :** Phospho (ST), with neutral losses 0.0000(shown in table), 97.9769

**Ions Score:** 83 **Expect:** 4e-007

**Matched b ions:** b(5), b(6), b(8), b(9)++, b(9), b(10)++, b(10), b(11), b(11)++, b(12), b(12)++, b(13), b(13)++, b(14), b(14)-98, b(14)-98++, b(14)++, b(15)-98, b(15)-98++, b(15)++, b(16), b(16)++, b(16)-98++, b(17)++, b(17), b(17)-98++, b(18)-98, b(18)-98++, b(18)-196++, b(18)++, b(19)-196, b(19)-196++, b(19)-98++, b(20)-98++, b(20)++, b(20)-196++, b(21)-196++, b(21)-98++, b(22)++, b(22)-98++, b(23)-98++, b(23)++, b(24)++, b(24)-196++, b(24)-98++, b(25)++, b(25)-98++

**Matched y ions:** y(2), y(3), y(4), y(5), y(5)++, y(6), y(7), y(8), y(8)++, y(9), y(9)-98++, y(9)++, y(9)-98, y(10), y(10)-98++, y(10)-98, y(10)++, y(11)-98++, y(11)++, y(11), y(12)++, y(12)-98++, y(12), y(12)-98, y(13), y(13)++, y(13)-196, y(13)-196++, y(13)-98++, y(13)-98, y(14)++, y(14), y(14)-98++, y(14)-98, y(14)-196++, y(15), y(15)-98++, y(15)++, y(15)-98, y(16), y(16)++, y(16)-196++, y(16)-98++, y(16)-196, y(17)++, y(17)-98++, y(18)++, y(20)-196++, y(20)-98++, y(20)++, y(21)++, y(22)-196++, y(22)++, y(24)++

**Precursor origin neutral loss:** +

## Peptide No.58

**AKPAAQSEEETATSPAASPTPQSAER**

**Confirmed sites:** @S:14,@S:18

**Ambiguous sites:**

MS/MS Fragmentation of **AKPAAQSEEETATSPAASPTPQSAER**

Found in **EIF3B\_MOUSE**, Eukaryotic translation initiation factor 3 subunit B OS=Mus musculus  
GN=Eif3b PE=1 SV=1

Match to Query 6513: 2839.295949 from(947.439259,3+)

Title: Elution from: 26.612 to 26.612 scan no 1700 cid35.00 polarity:+:MA10:m1s

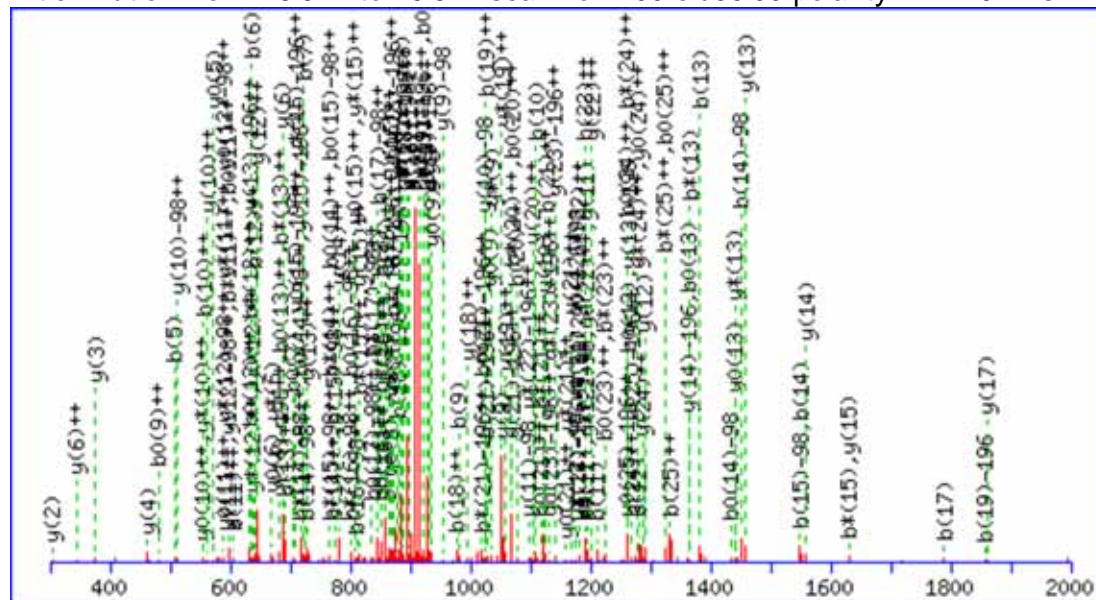

**Monoisotopic mass of neutral peptide Mr(calc):** 2839.2950

**Fixed modifications:** Carbamidomethyl (C) (apply to specified residues or termini only)

**Variable modifications:**

**N-term :** Dimethyl:2H(4)13C(2) (N-term)

**K2 :** Dimethyl:2H(4)13C(2) (K)

**S14 :** Phospho (ST), with neutral losses 0.0000(shown in table), 97.9769

**S18 :** Phospho (ST), with neutral losses 0.0000(shown in table), 97.9769

**Ions Score:** 78 **Expect:** 1.3e-006

**Matched b ions:** b(5), b(6), b(7), b(8), b(9), b(10)++, b(10), b(11), b(11)++, b(12), b(12)++, b(13)++, b(13), b(14)-98, b(14), b(14)-98++, b(14)++, b(15)-98, b(15)-98++, b(16)++, b(16)-98++, b(17)++, b(17), b(17)-98++, b(18)-98, b(18)-98++, b(18)++, b(18)-196++, b(19)-196, b(19)-196++, b(19)-98++, b(19)++, b(20)-98++, b(20)++, b(21)-196++, b(21)-98++, b(21)++, b(22)++, b(22)-98++, b(24)-98++, b(24)++, b(25)++, b(25)-98++

**Matched y ions:** y(2), y(3), y(4), y(6), y(6)++, y(8), y(9), y(9)-98, y(10), y(10)-98++, y(10)++, y(10)-98, y(11)++, y(11), y(11)-98, y(12)-98++, y(12)++, y(12), y(12)-98, y(13), y(13)++, y(13)-196++, y(13)-98++, y(13)-98, y(13)-196, y(14)++, y(14), y(14)-196++, y(14)-98++, y(14)-196, y(15), y(15)-196++, y(15)-98++, y(15)++, y(16)++, y(17), y(17)++, y(17)-98++, y(18)-196++, y(18)++, y(19)++, y(19)-98++, y(20)++, y(21)-196++, y(21)++, y(22)++, y(23)-98++, y(23)-196++, y(24)++, y(25)-196++

**Precursor origin neutral loss:** +

## Peptide No.59

**AKSPTPSLSPARNSDQEGGGK**

**Confirmed sites:** @S:3,@T:5,@S:9,@S:14

**Ambiguous sites:**

MS/MS Fragmentation of **AKSPTPSLSPARNSDQEGGGK**

Found in **SRRM1\_MOUSE**, Serine/arginine repetitive matrix protein 1 OS=Mus musculus GN=Srrm1 PE=1 SV=1





MS/MS Fragmentation of **AKTDHGAEIVYKSPVVS****GDTS****PR**

Found in **TAU\_MOUSE**, Microtubule-associated protein tau OS=Mus musculus GN=Mapt PE=1 SV=3

Match to Query 8593: 2737.217061 from(913.412963,3+)

Title: Elution from: 33.901 to 33.901 scan no 2767 cid35.00 polarity:+:MA10:m1s

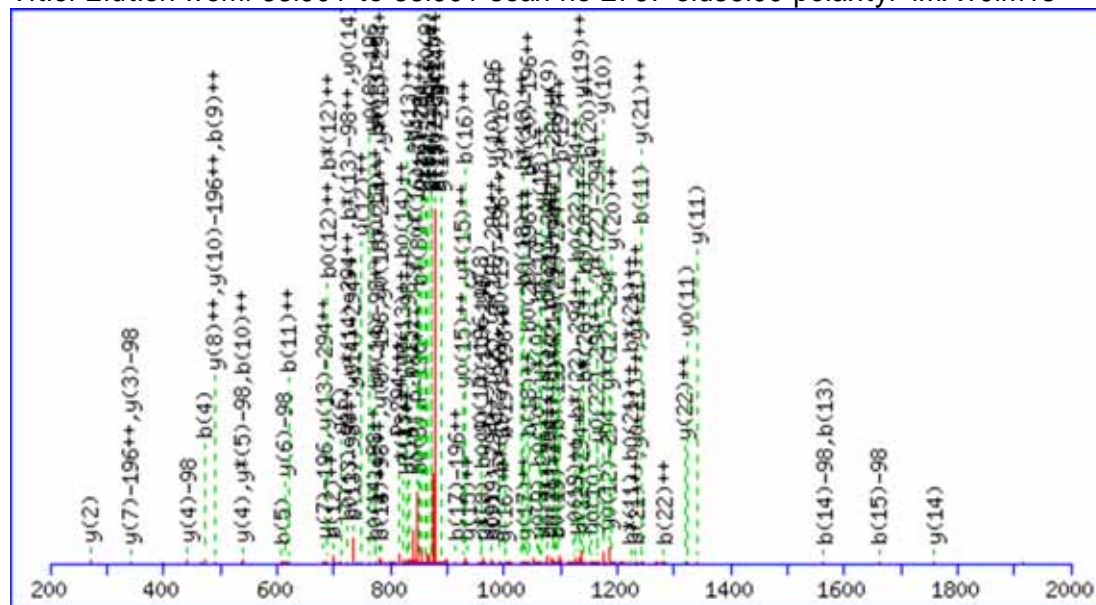

**Monoisotopic mass of neutral peptide Mr(calc): 2737.2166**

**Fixed modifications:** Carbamidomethyl (C) (apply to specified residues or termini only)

**Variable modifications:**

**N-term :** Dimethyl (N-term)

**K2 :** Dimethyl (K)

**K12 :** Dimethyl (K)

**S13 :** Phospho (ST), with neutral losses 97.9769(shown in table), 0.0000

**S17 :** Phospho (ST), with neutral losses 97.9769(shown in table), 0.0000

**S21 :** Phospho (ST), with neutral losses 97.9769(shown in table), 0.0000

**Ions Score: 47 Expect: 0.0017**

**Matched b ions:** b(4), b(5), b(8), b(9)++, b(9), b(10)++, b(10), b(11)++, b(11), b(12)++, b(13)-98++, b(13), b(13)++, b(14)-98, b(14)-98++, b(14)++, b(15)++, b(15)-98, b(15)-98++, b(16)-98++, b(16)++, b(17)-98++, b(17)-196++, b(18)-98++, b(18)++, b(19)-98++, b(19)++, b(19)-196++, b(20)-98++, b(20)++, b(21)-196++, b(21)-98++, b(21)++, b(21)-294++, b(22)-294++, b(22)-196++, b(22)++, b(22)-98++

**Matched y ions:** y(2), y(3)-98, y(4)-98, y(4), y(6), y(6)-98, y(7)-196++, y(7)-98, y(7), y(7)-196, y(8)-98, y(8)++, y(8), y(8)-196, y(9)-196, y(9)-98++, y(9)-98, y(9), y(10), y(10)-196++, y(10)-196, y(10)-98, y(11)-98++, y(11), y(11)-98, y(11)-196, y(12)-98++, y(12)++, y(13)-98++, y(13)-294++, y(13)++, y(14)-294++, y(14)++, y(14)-196, y(14), y(14)-196++, y(14)-98++, y(15)-98++, y(15)++, y(16)-294++, y(16)++, y(17)-294++, y(17)++, y(18)++, y(19)++, y(19)-98++, y(20)-196++, y(20)-98++, y(20)++, y(21)++, y(21)-98++, y(21)-294++, y(21)-196++, y(22)++, y(22)-98++

**Precursor origin neutral loss: +**

**Peptide No.61**

**AKTDHGAEIVYKSPVVS****GDTS****PR**

**Confirmed sites: @S:13,@S:21**

### Ambiguous sites:

MS/MS Fragmentation of **AKTDHGAEIVYKSPVVS**GDTS**PR**

Found in **TAU\_MOUSE**, Microtubule-associated protein tau OS=Mus musculus GN=Mapt PE=1 SV=3

Match to Query 7017: 2657.252824 from(665.320482,4+)

Title: Elution from: 32.277 to 32.277 scan no 2410 cid35.00 polarity:+:MA10:m1s

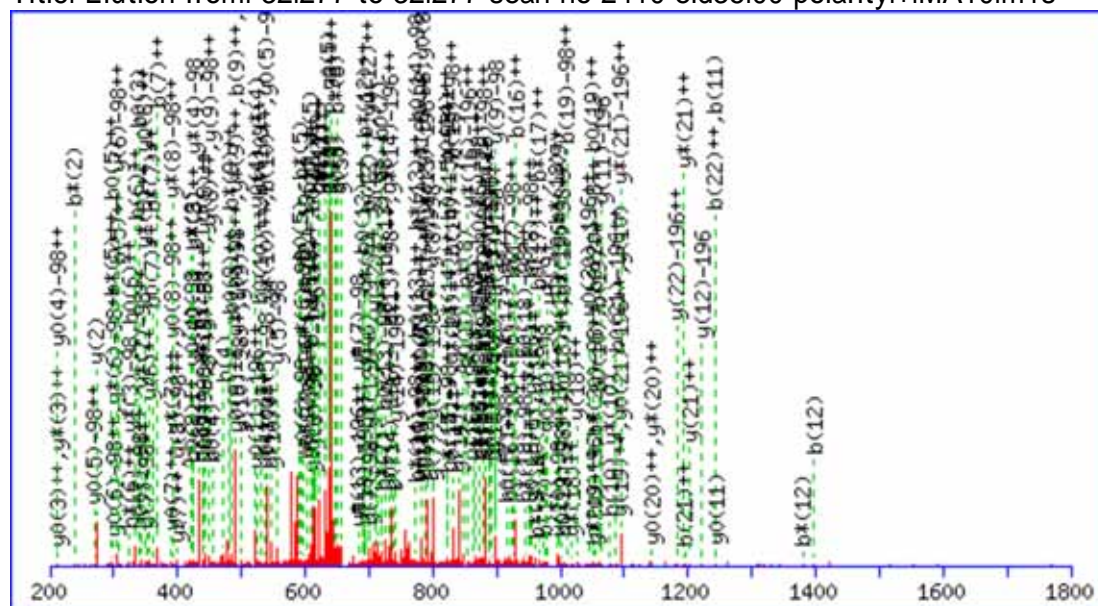

**Monoisotopic mass of neutral peptide Mr(calc): 2657.2503**

**Fixed modifications:** Carbamidomethyl (C) (apply to specified residues or termini only)

**Variable modifications:**

**N-term :** Dimethyl (N-term)

**K2 :** Dimethyl (K)

**K12 :** Dimethyl (K)

**S13 :** Phospho (ST), with neutral losses 0.0000(shown in table), 97.9769

**S21 :** Phospho (ST), with neutral losses 0.0000(shown in table), 97.9769

**Ions Score: 75 Expect: 3.1e-006**

**Matched b ions:** b(4), b(5)++, b(5), b(6)++, b(7)++, b(7), b(8)++, b(8), b(9)++, b(10)++, b(10), b(11)++, b(11), b(12), b(12)++, b(13)-98++, b(13)++, b(14)++, b(14)-98++, b(15)++, b(15)-98++, b(16)-98++, b(16)++, b(17)-98++, b(17)++, b(18)-98++, b(18)++, b(19)++, b(19)-98++, b(21)++, b(22)++, b(22)-98++

**Matched y ions:** y(2), y(3), y(4), y(4)-98, y(5)-98, y(5), y(6)++, y(6), y(6)-98++, y(6)-98, y(7), y(7)++, y(7)-98++, y(7)-98, y(8)-98++, y(8), y(8)-98, y(8)++, y(9)-98++, y(9)-98, y(9), y(9)++, y(10), y(10)-98, y(10)++, y(10)-98++, y(11)-98, y(11)-98++, y(11)++, y(11)-196, y(12)-196, y(12)-196++, y(12)++, y(13)++, y(13)-196++, y(13)-98++, y(14)-98++, y(14)++, y(14)-196++, y(15)-196++, y(15)++, y(15)-98++, y(16)++, y(16)-98++, y(16)-196++, y(17)++, y(17)-196++, y(17)-98++, y(18)++, y(18)-98++, y(19)++, y(19)-196++, y(20)-196++, y(21)++, y(22)-196++

**Precursor origin neutral loss: +**

### Peptide No.62

**AKTDHGAEIVYKSPVVS**GDTS**PR**

**Confirmed sites: @Y:11,@S:17,@S:21**



### Ambiguous sites:

MS/MS Fragmentation of **AKTDHGAEIVYKSPVVS**GDTS**PR**

Found in **TAU\_MOUSE**, Microtubule-associated protein tau OS=Mus musculus GN=Mapt PE=1 SV=3

Match to Query 6598: 2737.218300 from(913.413376,3+)

Title: Elution from: 33.892 to 33.892 scan no 2525 cid35.00 polarity:+:MA10:m1s

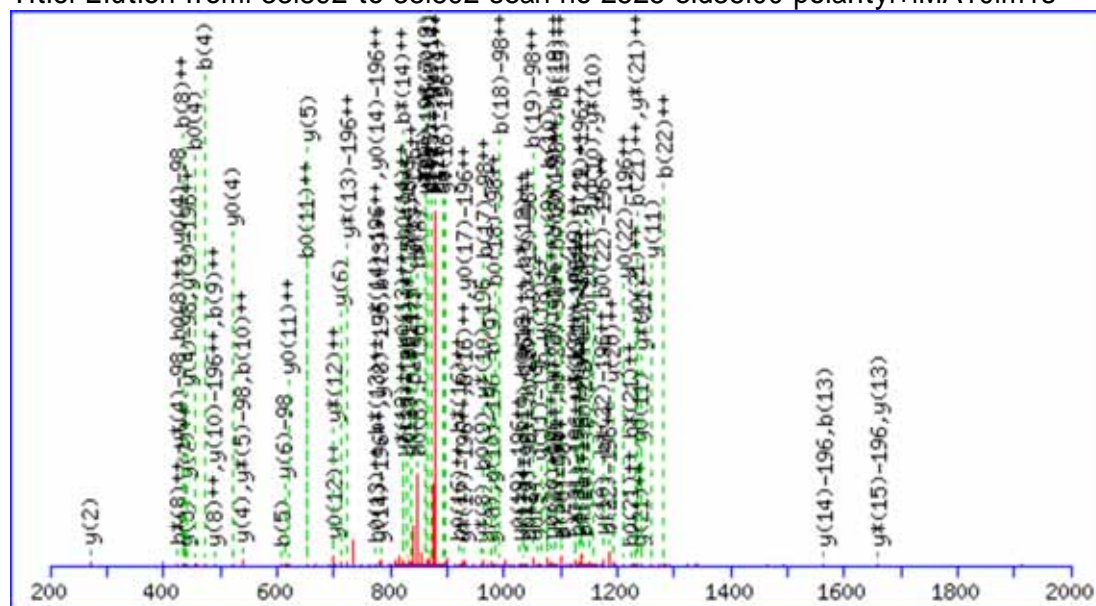

**Monoisotopic mass of neutral peptide Mr(calc):** 2737.2166

**Fixed modifications:** Carbamidomethyl (C) (apply to specified residues or termini only)

**Variable modifications:**

**N-term :** Dimethyl (N-term)

**K2 :** Dimethyl (K)

**Y11 :** Phospho (Y)

**K12 :** Dimethyl (K)

**S17 :** Phospho (ST), with neutral losses 97.9769(shown in table), 0.0000

**S21 :** Phospho (ST), with neutral losses 97.9769(shown in table), 0.0000

**Ions Score:** 53 **Expect:** 0.00043

**Matched b ions:** b(4), b(5), b(8)++, b(8), b(9)++, b(9), b(10)++, b(10), b(13), b(13)++, b(14)++, b(15)++, b(16)++, b(17)-98++, b(18)-98++, b(18)++, b(19)-98++, b(19)++, b(20)++, b(20)-98++, b(21)-196++, b(21)-98++, b(21)++, b(22)-196++, b(22)++, b(22)-98++

**Matched y ions:** y(2), y(3), y(4), y(4)-98, y(5), y(6), y(6)-98, y(7), y(7)++, y(7)-98, y(8)-98, y(8)++, y(8), y(8)-98++, y(8)-196, y(9)-196, y(9)-196++, y(9)-98++, y(9)-98, y(9), y(10), y(10)-196++, y(10)-98, y(10)-196, y(11)-196, y(11)-98, y(11), y(13), y(13)-98++, y(13)++, y(14)++, y(14)-196, y(14)-196++, y(14)-98++, y(15)-196++, y(15)-98++, y(17)++, y(18)-98++, y(18)++, y(19)-196++, y(19)++, y(19)-98++, y(20)-196++, y(20)-98++, y(20)++, y(21)-98++, y(21)++

**Precursor origin neutral loss:** +

### Peptide No.63

**AKTDHGAEIVYKSPVVS**GDTS**PR**

**Confirmed sites:** @T:20,@S:21



### Ambiguous sites:

MS/MS Fragmentation of **AKTDHGAEIVYKSPVVS**GDTS**PR**

Found in **TAU\_MOUSE**, Microtubule-associated protein tau OS=Mus musculus GN=Mapt PE=1 SV=3

Match to Query 6966: 2657.252460 from(665.320391,4+)

Title: Elution from: 32.091 to 32.091 scan no 2388 cid35.00 polarity:+:MA10:m1s

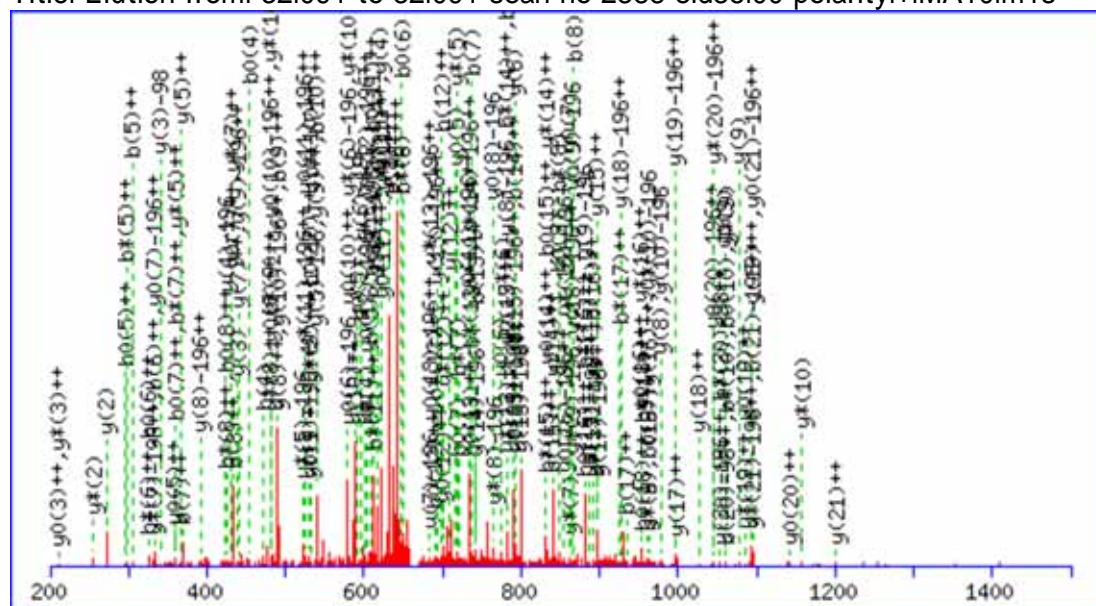

**Monoisotopic mass of neutral peptide Mr(calc): 2657.2503**

**Fixed modifications:** Carbamidomethyl (C) (apply to specified residues or termini only)

**Variable modifications:**

**N-term :** Dimethyl (N-term)

**K2 :** Dimethyl (K)

**K12 :** Dimethyl (K)

**T20 :** Phospho (ST), with neutral losses 97.9769(shown in table), 0.0000

**S21 :** Phospho (ST), with neutral losses 97.9769(shown in table), 0.0000

**Ions Score: 50 Expect: 0.001**

**Matched b ions:** b(4), b(5)++, b(5), b(6)++, b(7)++, b(7), b(8)++, b(8), b(9)++, b(10)++, b(11)++, b(12)++, b(13)++, b(14)++, b(15)++, b(16)++, b(17)++, b(18)++, b(20)-98++, b(21)-196++

**Matched y ions:** y(2), y(3)-98, y(3), y(4), y(4)-98, y(4)-196, y(5)-196, y(5)-98, y(5)++, y(6), y(6)-98++, y(6)-196, y(6)-98, y(7)-98++, y(7)++, y(7)-196, y(7)-98, y(8)++, y(8)-98, y(8)-196, y(8)-196++, y(8)-98++, y(8), y(9)-98++, y(9)-196, y(9)++, y(9), y(9)-196++, y(10)-196++, y(10)++, y(10)-98++, y(10)-196, y(11)-196++, y(11)-98++, y(11)++, y(12)-196++, y(12)++, y(13)++, y(13)-98++, y(13)-196++, y(14)++, y(14)-98++, y(14)-196++, y(15)-196++, y(15)++, y(15)-98++, y(16)-98++, y(16)++, y(16)-196++, y(17)-196++, y(17)++, y(17)-98++, y(18)++, y(18)-196++, y(18)-98++, y(19)++, y(19)-98++, y(19)-196++, y(20)-196++, y(21)++

**Precursor origin neutral loss: +**

### Peptide No.64

**AKTDHGAEIVYKSPVVS**GDTS**PR**

**Confirmed sites: @S:13,@S:17,@S:21**



# AKTDHGAEIVYKSPVVSQDTSPR

Confirmed sites: @S:13,@S:17,@T:20

Ambiguous sites:

## MS/MS Fragmentation of AKTDHGAEIVYKSPVVSQDTSPR

Found in **TAU\_MOUSE**, Microtubule-associated protein tau OS=Mus musculus GN=Mapt PE=1 SV=3

Match to Query 7113: 2755.313565 from(919.445131,3+)

Title: Elution from: 33.796 to 33.796 scan no 2620 cid35.00 polarity:+:MA10:m1s

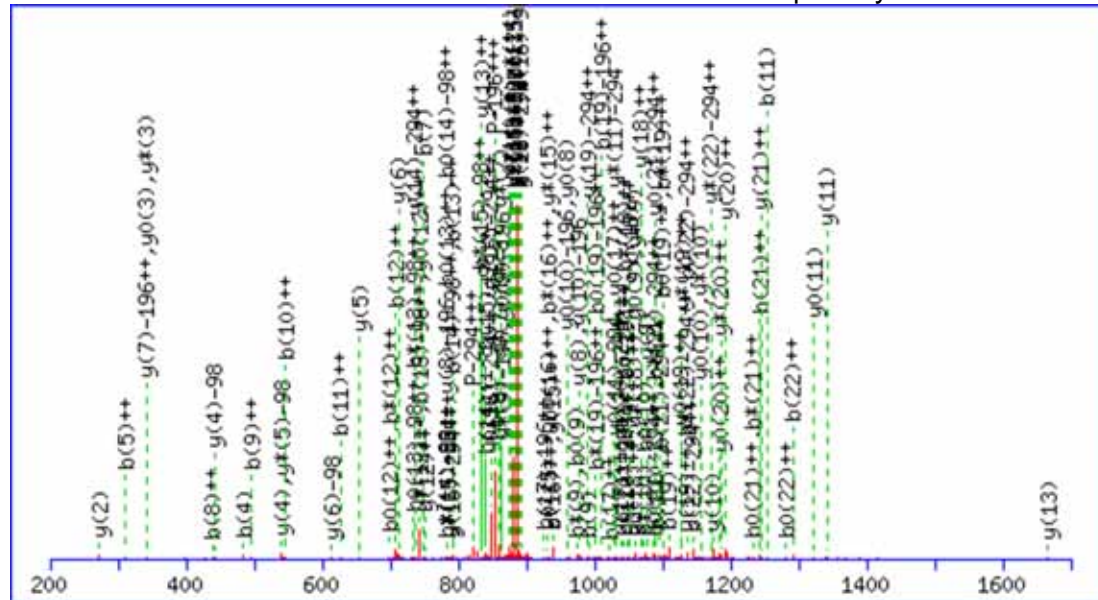

**Monoisotopic mass of neutral peptide Mr(calc): 2755.3121**

**Fixed modifications:** Carbamidomethyl (C) (apply to specified residues or termini only)

**Variable modifications:**

**N-term :** Dimethyl:2H(4)13C(2) (N-term)

**K2 :** Dimethyl:2H(4)13C(2) (K)

**K12 :** Dimethyl:2H(4)13C(2) (K)

**S13 :** Phospho (ST), with neutral losses 0.0000(shown in table), 97.9769

**S17 :** Phospho (ST), with neutral losses 0.0000(shown in table), 97.9769

**T20 :** Phospho (ST), with neutral losses 0.0000(shown in table), 97.9769

**Ions Score: 62 Expect: 6e-005**

**Matched b ions:** b(4), b(5)++, b(7), b(8)++, b(8), b(9)++, b(9), b(10)++, b(10), b(11)++, b(11), b(12)++, b(13)-98++, b(13)++, b(14)++, b(14)-98++, b(15)++, b(15)-98++, b(16)++, b(16)-98++, b(17)-98++, b(17)-196++, b(17)++, b(18)++, b(18)-98++, b(19)-98++, b(19)++, b(19)-196++, b(20)-196++, b(20)-98++, b(21)-196++, b(21)-98++, b(21)++, b(21)-294++, b(22)++, b(22)-294++, b(22)-196++, b(22)-98++

**Matched y ions:** y(2), y(4)-98, y(4), y(5), y(6)-98, y(6), y(7)-196++, y(7), y(7)-98, y(8)-98, y(8), y(8)-196, y(9)-196, y(9)-98, y(9), y(10), y(10)-196, y(10)-98, y(11)-196, y(11), y(11)-98, y(11)-294, y(12)-196++, y(12)-98++, y(12)++, y(13), y(13)-196++, y(13)-98++, y(13)++, y(14)-98, y(14)-294++, y(14)-196++, y(14)-98++, y(14)++, y(15)++, y(15)-98++, y(15)-196++, y(15)-294++, y(16)-196++, y(17)++, y(17)-294++, y(17)-98++, y(18)-98++, y(18)++, y(19)-98++, y(19)++, y(19)-196++, y(19)-294++, y(20)-98++, y(20)++, y(20)-196++, y(20)-294++, y(21)-98++, y(21)++

**Precursor origin neutral loss: +**



## Peptide No.66

AKTDHGAEIVYKSPVVSQDTSPR

Confirmed sites: @S:13,@S:21

Ambiguous sites:

MS/MS Fragmentation of **AKTDHGAEIVYKSPVVSQDTSPR**

Found in **TAU\_MOUSE**, Microtubule-associated protein tau OS=Mus musculus GN=Mapt PE=1 SV=3

Match to Query 7008: 2675.347974 from(892.789934,3+)

Title: Elution from: 32.142 to 32.142 scan no 2395 cid35.00 polarity:+:MA10:m1s

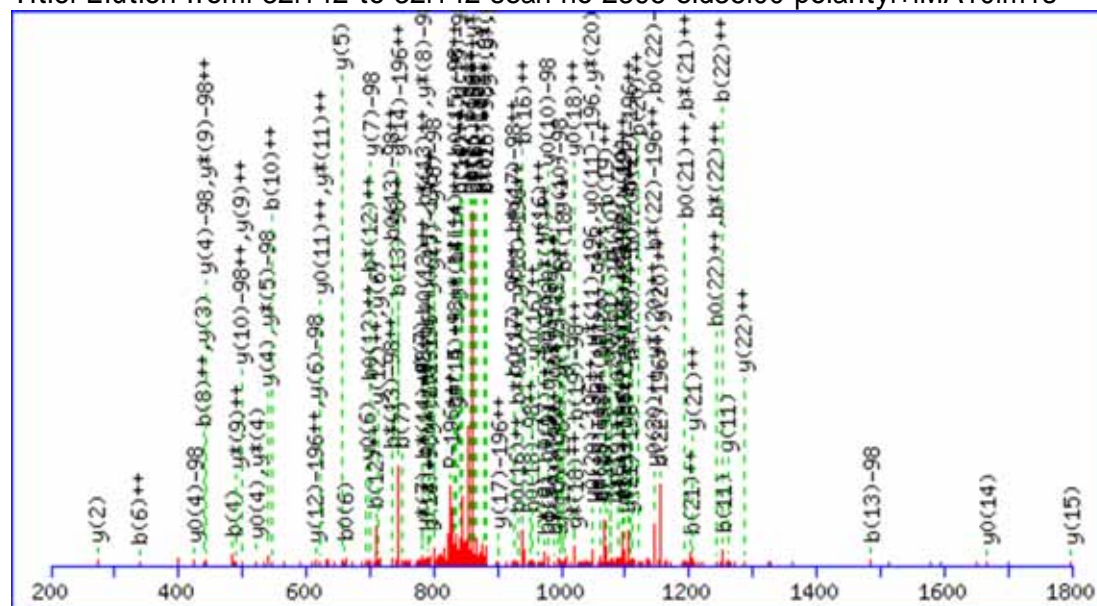

**Monoisotopic mass of neutral peptide Mr(calc):** 2675.3457

**Fixed modifications:** Carbamidomethyl (C) (apply to specified residues or termini only)

**Variable modifications:**

**N-term :** Dimethyl:2H(4)13C(2) (N-term)

**K2 :** Dimethyl:2H(4)13C(2) (K)

**K12 :** Dimethyl:2H(4)13C(2) (K)

**S13 :** Phospho (ST), with neutral losses 0.0000(shown in table), 97.9769

**S21 :** Phospho (ST), with neutral losses 0.0000(shown in table), 97.9769

**Ions Score:** 44 **Expect:** 0.0035

**Matched b ions:** b(4), b(6)++, b(7), b(8)++, b(8), b(10)++, b(10), b(11), b(12)++, b(13)-98++, b(13)-98, b(13)++, b(14)-98++, b(14)++, b(15)-98++, b(16)++, b(19)++, b(19)-98++, b(20)-98++, b(20)++, b(21)-98++, b(21)++, b(21)-196++, b(22)-196++, b(22)++, b(22)-98++

**Matched y ions:** y(2), y(3), y(4)-98, y(4), y(5), y(6)-98, y(6), y(7)-98, y(7), y(8)-98, y(9)++, y(10), y(10)-98++, y(10)-98, y(11), y(11)-98, y(12)-98++, y(12)-98, y(12)-196++, y(12)++, y(13)-98++, y(13)++, y(14)++, y(14)-196++, y(14)-98++, y(15), y(15)-98++, y(16)-196++, y(16)++, y(17)-196++, y(17)++, y(18)-196++, y(18)-98++, y(19)-98++, y(19)++, y(19)-196++, y(20)++, y(20)-98++, y(21)++, y(21)-196++, y(21)-98++, y(22)++

**Precursor origin neutral loss:** +

## Peptide No.67



### ANSEVAQWR

Confirmed sites: @S:3

Ambiguous sites:

#### MS/MS Fragmentation of ANSEVAQWR

Found in **MYH1\_MOUSE**, Myosin-1 OS=Mus musculus GN=Myh1 PE=1 SV=1

Match to Query 846: 1167.507932 from(584.761242,2+)

Title: Elution from: 33.915 to 33.915 scan no 2634 cid35.00 polarity:+:MA10

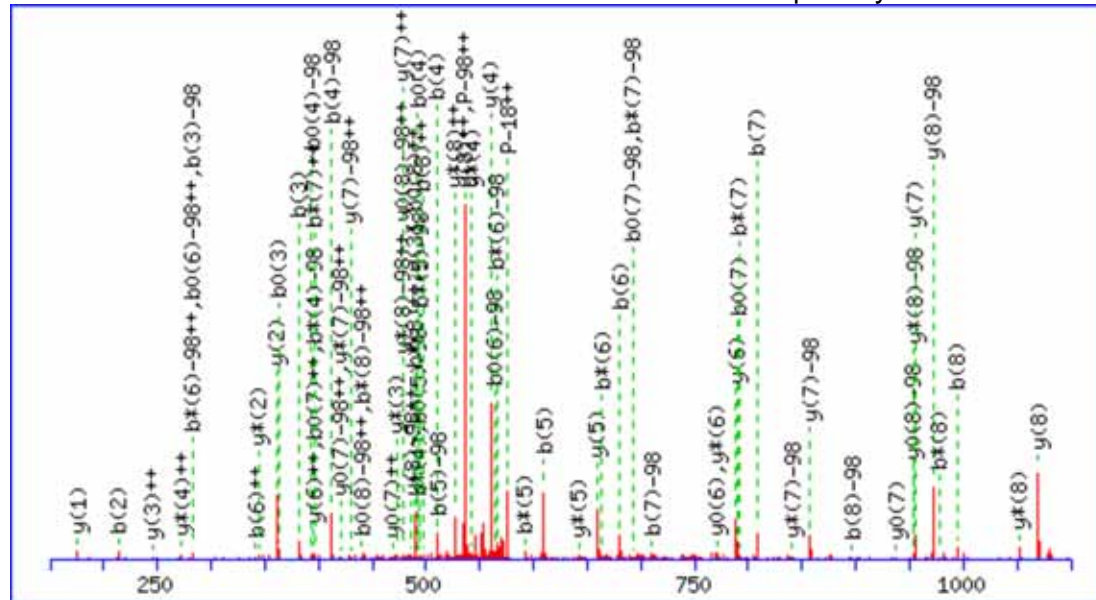

**Monoisotopic mass of neutral peptide Mr(calc): 1167.5074**

**Fixed modifications:** Carbamidomethyl (C) (apply to specified residues or termini only)

**Variable modifications:**

**N-term :** Dimethyl (N-term)

**S3 :** Phospho (ST), with neutral losses 97.9769(shown in table), 0.0000

**Ions Score:** 68 **Expect:** 3.2e-006

**Matched b ions:** b(2), b(3), b(3)-98, b(4)-98, b(4), b(5), b(5)-98, b(6), b(6)++, b(7), b(7)-98, b(8), b(8)-98, b(8)++

**Matched y ions:** y(1), y(2), y(3), y(3)++, y(4), y(5), y(6), y(6)++, y(7)-98, y(7), y(7)-98++, y(7)++, y(8)++, y(8)-98, y(8), y(8)-98++

**Precursor origin neutral loss:** +

### Peptide No.68

#### ANSEVAQWR

Confirmed sites: @S:3

Ambiguous sites:

#### MS/MS Fragmentation of ANSEVAQWR

Found in **MYH1\_MOUSE**, Myosin-1 OS=Mus musculus GN=Myh1 PE=1 SV=1

Match to Query 980: 1173.539082 from(587.776817,2+)

Title: Elution from: 33.938 to 33.938 scan no 2674 cid35.00 polarity:+:MA10

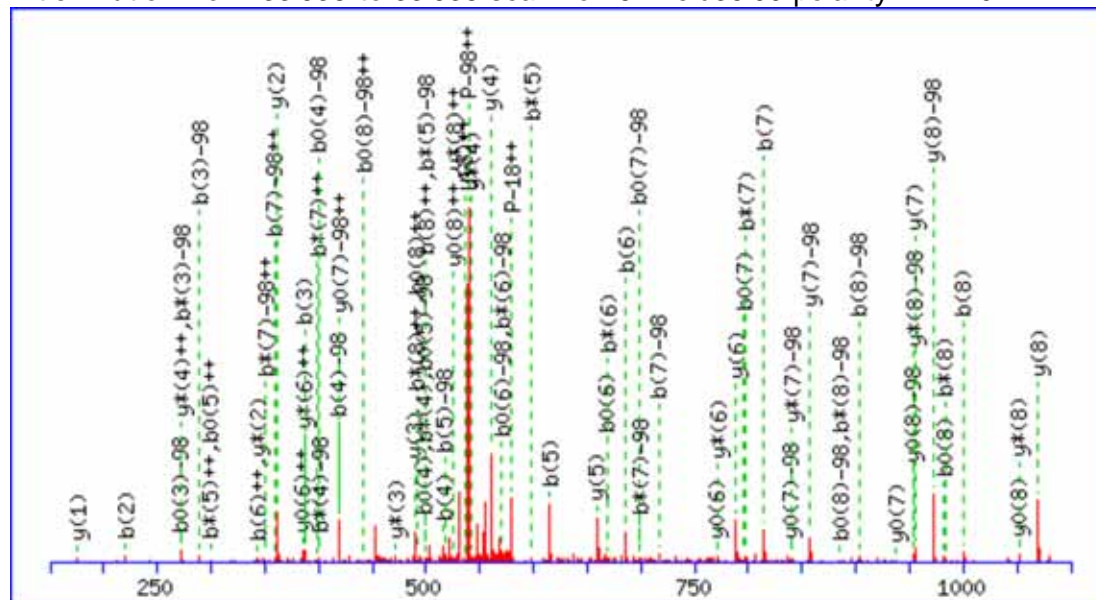

Monoisotopic mass of neutral peptide Mr(calc): 1173.5392

Fixed modifications: Carbamidomethyl (C) (apply to specified residues or termini only)

Variable modifications:

N-term : Dimethyl:2H(4)13C(2) (N-term)

S3 : Phospho (ST), with neutral losses 97.9769(shown in table), 0.0000

Ions Score: 49 Expect: 0.00027

Matched b ions: b(2), b(3)-98, b(3), b(4)-98, b(4), b(5), b(5)-98, b(6), b(6)++, b(7)-98, b(7), b(7)-98++, b(8), b(8)++, b(8)-98

Matched y ions: y(1), y(2), y(3), y(4), y(5), y(6), y(7)-98, y(7), y(8)-98, y(8), y(8)++

Precursor origin neutral loss: +

## Peptide No.69

APSWIDTGLSEMR

Confirmed sites: @S:3

Ambiguous sites:

MS/MS Fragmentation of **APSWIDTGLSEMR**

Found in **CRYAB\_MOUSE**, Alpha-crystallin B chain OS=Mus musculus GN=Cryab PE=1 SV=2

Match to Query 2238: 1575.722424 from(788.868488,2+)

Title: Elution from: 60.009 to 60.009 scan no 5695 cid35.00 polarity:+:MA10

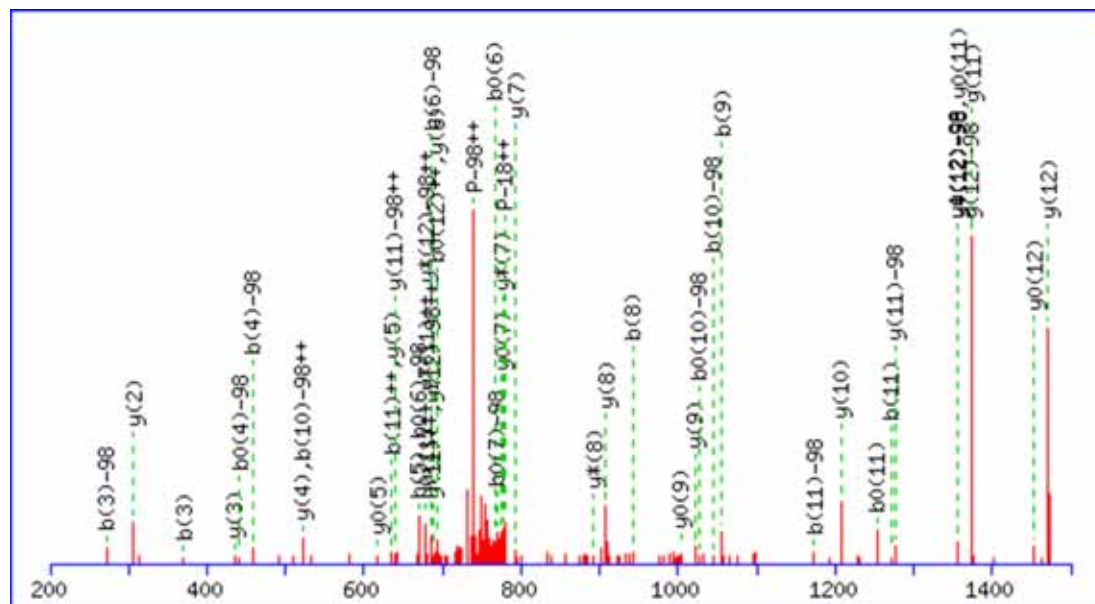

**Monoisotopic mass of neutral peptide Mr(calc):** 1575.7216

**Fixed modifications:** Carbamidomethyl (C) (apply to specified residues or termini only)

**Variable modifications:**

**N-term :** Dimethyl:2H(4)13C(2) (N-term)

**S3 :** Phospho (ST), with neutral losses 97.9769(shown in table), 0.0000

**Ions Score:** 55 **Expect:** 0.00013

**Matched b ions:** b(3)-98, b(3), b(4)-98, b(5), b(6)-98, b(8), b(9), b(10)-98++, b(10)-98, b(11)++, b(11)-98, b(11)

**Matched y ions:** y(2), y(3), y(4), y(5), y(6), y(7), y(8), y(9), y(10), y(11)-98, y(11), y(11)-98++, y(11)++, y(12)-98, y(12), y(12)-98++

**Precursor origin neutral loss:** +

## Peptide No.70

**APTPSPVRSVSPAGR**

**Confirmed sites:** @S:5,@S:9,@S:11

**Ambiguous sites:**

**MS/MS Fragmentation of** **APTPSPVRSVSPAGR**

Found in **TITIN\_MOUSE**, Titin OS=Mus musculus GN=Ttn PE=1 SV=1

Match to Query 4015: 1745.730819 from(582.917549,3+)

Title: Elution from: 29.666 to 29.666 scan no 2259 cid35.00 polarity:+:MA10

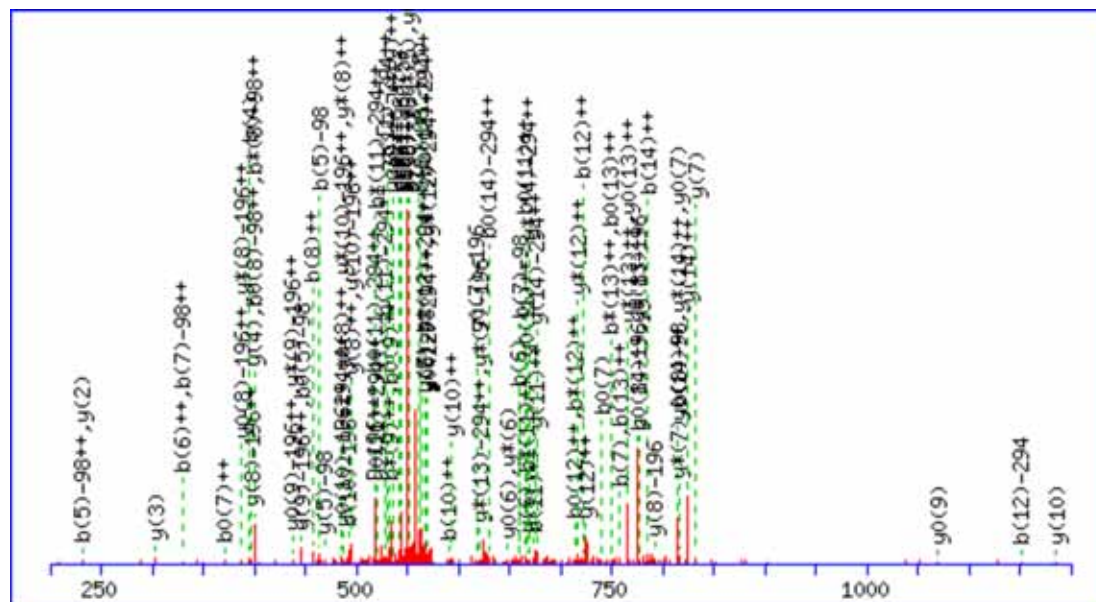

**Monoisotopic mass of neutral peptide Mr(calc):** 1745.7304

**Fixed modifications:** Carbamidomethyl (C) (apply to specified residues or termini only)

**Variable modifications:**

**N-term :** Dimethyl (N-term)

**S5 :** Phospho (ST), with neutral losses 0.0000(shown in table), 97.9769

**S9 :** Phospho (ST), with neutral losses 0.0000(shown in table), 97.9769

**S11 :** Phospho (ST), with neutral losses 0.0000(shown in table), 97.9769

**Ions Score:** 40 **Expect:** 0.0025

**Matched b ions:** b(4), b(5)-98++, b(5)-98, b(5), b(6)++, b(6)-98, b(6), b(7)-98++, b(7)-98, b(7), b(8)-98, b(8)++, b(9)-98++, b(9)++, b(10)-196++, b(10)-98++, b(10)++, b(11)-98++, b(11)-196, b(11)-294++, b(11)++, b(12)-196++, b(12)-294, b(12)-98++, b(12)++, b(13)-196++, b(13)-98++, b(13)++, b(14)++, b(14)-196++, b(14)-98++

**Matched y ions:** y(2), y(3), y(4), y(5)-98, y(5), y(6), y(6)-98, y(7), y(7)-98, y(8)++, y(8)-98++, y(8)-196++, y(8)-196, y(9)-98++, y(9)-196++, y(9)++, y(10)-196++, y(10), y(10)-98++, y(10)++, y(11)++, y(11)-98++, y(11)-294++, y(12)-98++, y(12)++, y(12)-196++, y(13)++, y(13)-196++, y(13)-98++, y(14)-98++, y(14)++, y(14)-294++, y(14)-196++

**Precursor origin neutral loss:** +

## Peptide No.71

**APTPSPVRSVSPAGR**

**Confirmed sites:** @S:9,@S:11

**Ambiguous sites:**

MS/MS Fragmentation of **APTPSPVRSVSPAGR**

Found in **TITIN\_MOUSE**, Titin OS=Mus musculus GN=Ttn PE=1 SV=1

Match to Query 4202: 1665.765298 from(833.889925,2+)

Title: Elution from: 28.371 to 28.371 scan no 1993 cid35.00 polarity:+:MA10



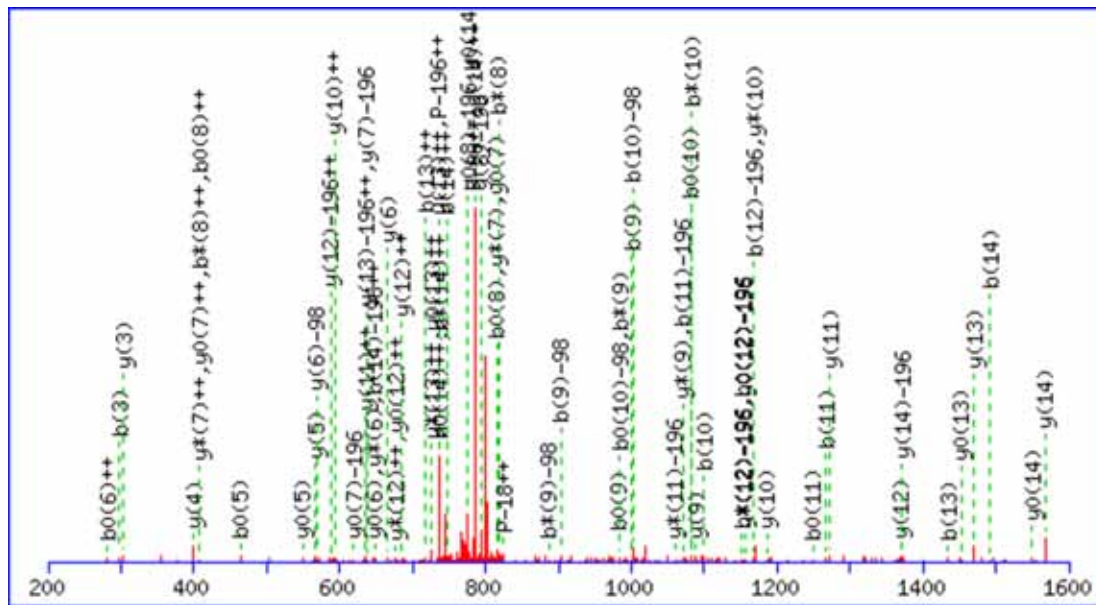

**Monoisotopic mass of neutral peptide Mr(calc): 1665.7641**

**Fixed modifications:** Carbamidomethyl (C) (apply to specified residues or termini only)

**Variable modifications:**

**N-term :** Dimethyl (N-term)

**S9 :** Phospho (ST), with neutral losses 0.0000(shown in table), 97.9769

**S11 :** Phospho (ST), with neutral losses 0.0000(shown in table), 97.9769

**Ions Score:** 39 **Expect:** 0.005

**Matched b ions:** b(3), b(9)-98, b(9), b(10)-98, b(10), b(11)-98, b(11), b(11)-196, b(12)-196, b(13), b(13)++, b(14)-196++, b(14), b(14)++

**Matched y ions:** y(3), y(4), y(5), y(6), y(6)-98, y(7)-98, y(7)-196, y(8)-196, y(9), y(9)-98, y(10)++, y(10), y(11)++, y(11), y(11)-98++, y(12)-98++, y(12)-98, y(12), y(12)-196++, y(12)++, y(13)++, y(13), y(13)-98, y(13)-196++, y(13)-98++, y(14)-98++, y(14)++, y(14)-98, y(14), y(14)-196

**Precursor origin neutral loss:** +

## Peptide No.72

**APTPSPVRSVSPAGR**

**Confirmed sites:** @T:3,@S:11

**Ambiguous sites:**

**MS/MS Fragmentation of** **APTPSPVRSVSPAGR**

Found in **TITIN\_MOUSE**, Titin OS=Mus musculus GN=Ttn PE=1 SV=1

Match to Query 3512: 1665.764392 from(833.889472,2+)

Title: Elution from: 28.526 to 28.526 scan no 2101 cid35.00 polarity:+:MA10

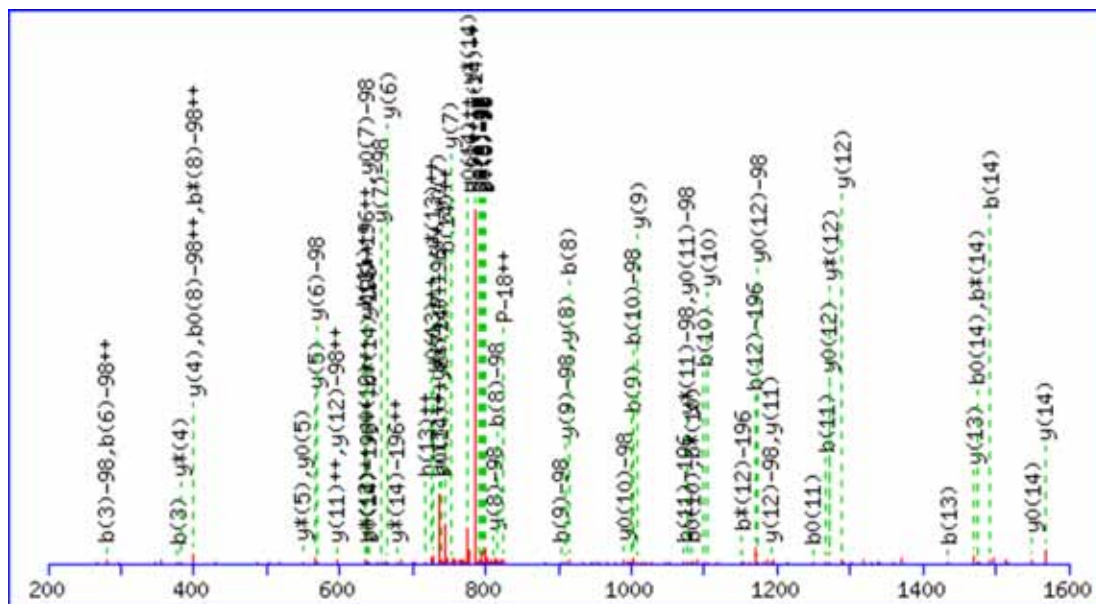

**Monoisotopic mass of neutral peptide  $M_r(\text{calc})$ :** 1665.7641

**Fixed modifications:** Carbamidomethyl (C) (apply to specified residues or termini only)

**Variable modifications:**

**N-term :** Dimethyl (N-term)

**T3 :** Phospho (ST), with neutral losses 0.0000(shown in table), 97.9769

**S11 :** Phospho (ST), with neutral losses 0.0000(shown in table), 97.9769

**Ions Score:** 39 **Expect:** 0.0048

**Matched b ions:** b(3)-98, b(3), b(6)-98++, b(8), b(8)-98, b(9)-98, b(9), b(10)-98, b(10), b(11)-98, b(11)-196, b(11)++, b(11), b(12)-196, b(12)-98++, b(12)-98, b(13), b(13)-98, b(13)++, b(14), b(14)++

**Matched y ions:** y(4), y(5), y(6)-98, y(6), y(7)-98, y(7), y(8), y(8)-98, y(9)-98, y(9), y(10), y(11)++, y(11), y(12), y(12)-98, y(12)-98, y(13)++, y(13)-196, y(13), y(14)-98, y(14)++, y(14)-98, y(14)

**Precursor origin neutral loss:** +

## Peptide No.73

**APTPSPVRSVSPAGR**

**Confirmed sites:** @T:3,@S:5,@S:9,@S:11

**Ambiguous sites:**

MS/MS Fragmentation of **APTPSPVRSVSPAGR**

Found in **TITIN\_MOUSE**, Titin OS=Mus musculus GN=Ttn PE=1 SV=1

Match to Query 4521: 1825.696938 from(913.855745,2+)

Title: Elution from: 31.166 to 31.166 scan no 2466 cid35.00 polarity:+MA10

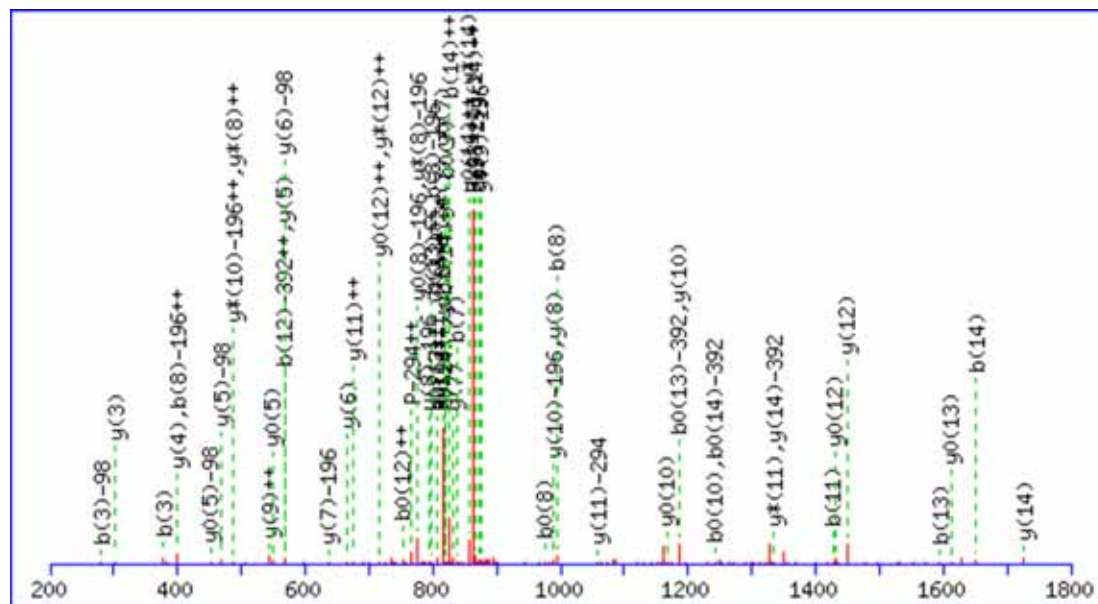

**Monoisotopic mass of neutral peptide Mr(calc): 1825.6967**

**Fixed modifications:** Carbamidomethyl (C) (apply to specified residues or termini only)

**Variable modifications:**

**N-term :** Dimethyl (N-term)

**T3 :** Phospho (ST), with neutral losses 0.0000(shown in table), 97.9769

**S5 :** Phospho (ST), with neutral losses 0.0000(shown in table), 97.9769

**S9 :** Phospho (ST), with neutral losses 0.0000(shown in table), 97.9769

**S11 :** Phospho (ST), with neutral losses 0.0000(shown in table), 97.9769

**Ions Score:** 49 **Expect:** 0.00017

**Matched b ions:** b(3), b(3)-98, b(5)-98, b(7), b(8)-196++, b(8)-98, b(8), b(8)-196, b(9)-98, b(9)-294, b(9)-196, b(10)-98, b(10)-196, b(11)-98, b(11)-294++, b(11)-196, b(11), b(12)-196, b(12)-392++, b(13)-98, b(13), b(13)-196, b(13)-196++, b(13)++, b(14), b(14)-98, b(14)++

**Matched y ions:** y(3), y(4), y(5)-98, y(5), y(6), y(6)-98, y(7)-196, y(7)-98, y(7), y(8), y(8)-196, y(9)++, y(10)-98++, y(10), y(10)-196, y(10)-98, y(11)++, y(11)-294, y(12), y(12)-98++, y(12)-98, y(12)-196, y(13)-98++, y(13)++, y(13)-98, y(14)++, y(14)-196, y(14)-98, y(14), y(14)-196++, y(14)-98++, y(14)-294, y(14)-392, y(14)-294++

**Precursor origin neutral loss:** +

## Peptide No.74

**APTPSPVRSVSPAGR**

**Confirmed sites: @S:9,@S:11**

**Ambiguous sites:**

**MS/MS Fragmentation of APTPSPVRSVSPAGR**

Found in **TITIN\_MOUSE**, Titin OS=Mus musculus GN=Ttn PE=1 SV=1

Match to Query 2969: 1671.796431 from(558.272753,3+)

Title: Elution from: 28.418 to 28.418 scan no 1898 cid35.00 polarity:+:MA10

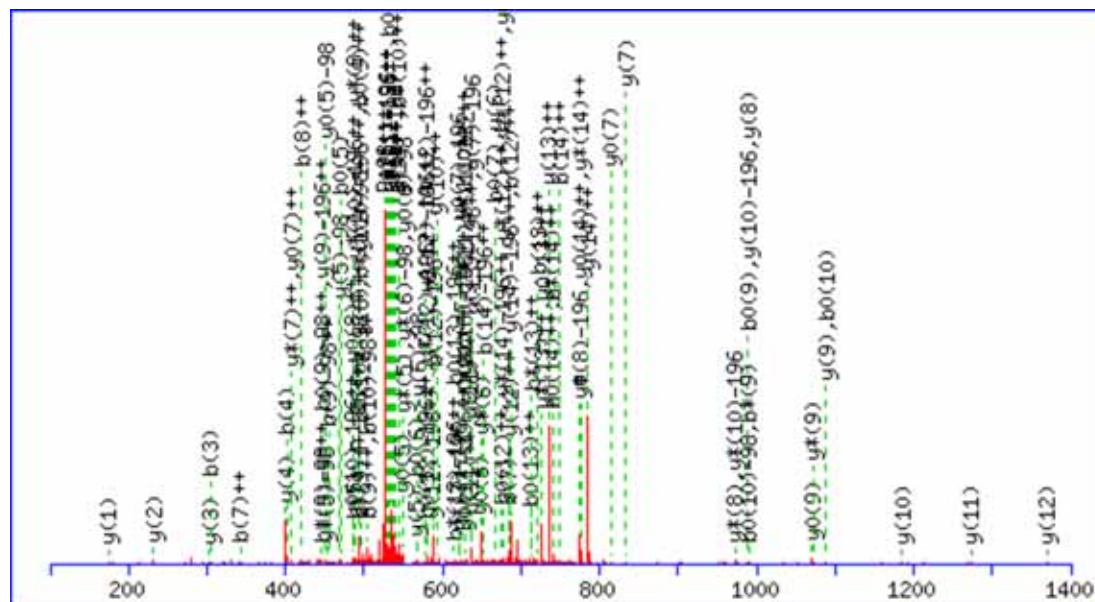

**Monoisotopic mass of neutral peptide Mr(calc):** 1671.7959

**Fixed modifications:** Carbamidomethyl (C) (apply to specified residues or termini only)

**Variable modifications:**

**N-term :** Dimethyl:2H(4)13C(2) (N-term)

**S9 :** Phospho (ST), with neutral losses 0.0000(shown in table), 97.9769

**S11 :** Phospho (ST), with neutral losses 0.0000(shown in table), 97.9769

**Ions Score:** 35 **Expect:** 0.017

**Matched b ions:** b(3), b(4), b(5), b(7)++, b(7), b(8)++, b(9)-98++, b(9)++, b(10)-98++, b(11)-98++, b(11)++, b(11)-196++, b(12)-196++, b(12)++, b(12)-98, b(12)-98++, b(13)-98++, b(13)++, b(14)-196++, b(14)-98++, b(14)++

**Matched y ions:** y(1), y(2), y(3), y(4), y(5)-98, y(5), y(6), y(6)-98, y(7)-98, y(7), y(7)-196, y(8), y(8)-98++, y(8)++, y(9), y(9)-98, y(9)++, y(9)-196++, y(9)-98++, y(10)-196, y(10), y(10)-98++, y(10)-196++, y(10)++, y(11)-98++, y(11), y(11)++, y(11)-196++, y(12), y(12)-98++, y(12)++, y(12)-196++, y(13)++, y(13)-98++, y(13)-196++, y(14)-98++, y(14)++, y(14)-196++

**Precursor origin neutral loss:** +

## Peptide No.75

**APTPSPVRSVSPAGR**

**Confirmed sites:** @T:3,@S:5,@S:11

**Ambiguous sites:**

MS/MS Fragmentation of **APTPSPVRSVSPAGR**

Found in **TITIN\_MOUSE**, Titin OS=Mus musculus GN=Ttn PE=1 SV=1

Match to Query 3338: 1751.763603 from(584.928477,3+)

Title: Elution from: 30.150 to 30.150 scan no 2126 cid35.00 polarity+:MA10:m1s





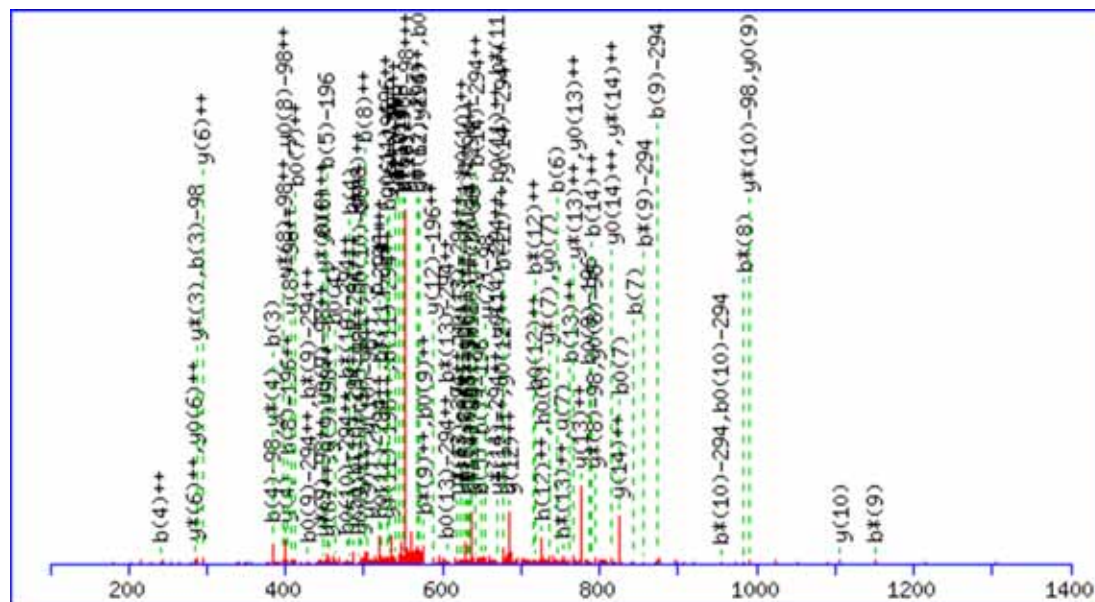

**Monoisotopic mass of neutral peptide Mr(calc):** 1751.7622

**Fixed modifications:** Carbamidomethyl (C) (apply to specified residues or termini only)

**Variable modifications:**

**N-term :** Dimethyl:2H(4)13C(2) (N-term)

**T3 :** Phospho (ST), with neutral losses 0.0000(shown in table), 97.9769

**S5 :** Phospho (ST), with neutral losses 0.0000(shown in table), 97.9769

**S9 :** Phospho (ST), with neutral losses 0.0000(shown in table), 97.9769

**Ions Score:** 29 **Expect:** 0.045

**Matched b ions:** b(3)-98, b(3), b(4)-98, b(4)++, b(4), b(5)-196, b(5)-98, b(5), b(6)-196, b(6)-98, b(6), b(7)-196, b(7)-98, b(7), b(8)-98++, b(8)-196++, b(8)++, b(9)-98++, b(9)-196++, b(9)-294, b(10)-196++, b(10)-294++, b(10)++, b(11)-98++, b(11)++, b(11)-294++, b(12)-196++, b(12)-98++, b(12)++, b(13)-196++, b(13)-98++, b(13)++, b(14)-294++, b(14)-196++, b(14)-98++, b(14)++

**Matched y ions:** y(4), y(5), y(6)++, y(7), y(7)-98, y(8)++, y(8)-98++, y(9)-98++, y(9)++, y(10)++, y(10), y(10)-98++, y(11)++, y(11)-196++, y(11)-98++, y(12)-98++, y(12)++, y(12)-196++, y(13)++, y(13)-294++, y(13)-98++, y(13)-196++, y(14)-98++, y(14)++, y(14)-196++, y(14)-294++

**Precursor origin neutral loss:** +

## Peptide No.77

**APTPSPVRSVSPAGR**

**Confirmed sites:** @T:3,@S:5,@S:9,@S:11

**Ambiguous sites:**

MS/MS Fragmentation of **APTPSPVRSVSPAGR**

Found in **TITIN\_MOUSE**, Titin OS=Mus musculus GN=Ttn PE=1 SV=1

Match to Query 3862: 1831.729912 from(916.872232,2+)

Title: Elution from: 30.937 to 30.937 scan no 2233 cid35.00 polarity:+:MA10:m1s

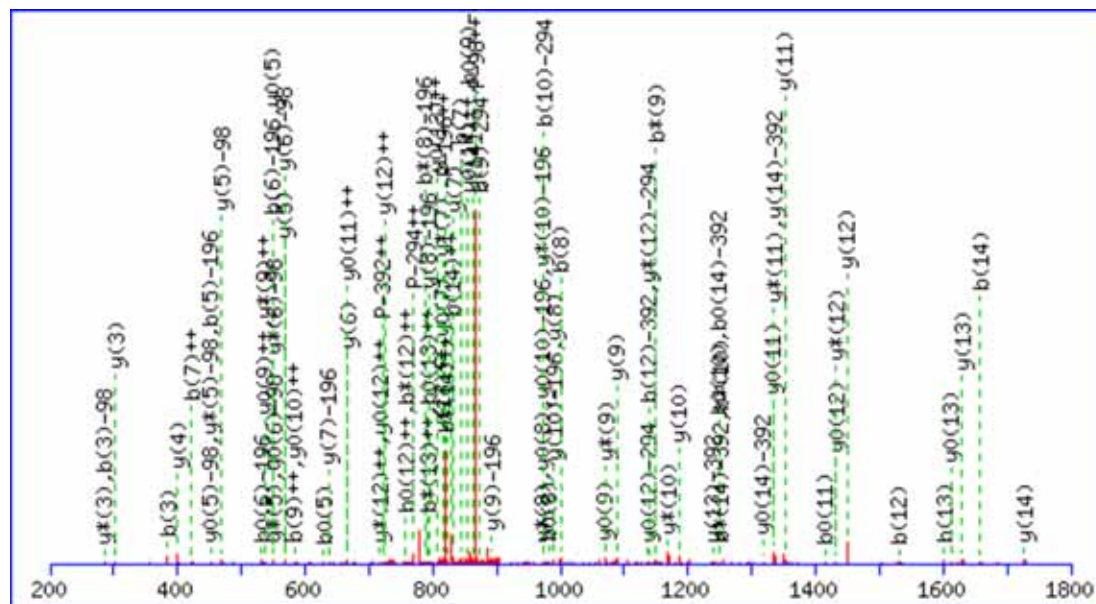

**Monoisotopic mass of neutral peptide Mr(calc):** 1831.7285

**Fixed modifications:** Carbamidomethyl (C) (apply to specified residues or termini only)

**Variable modifications:**

**N-term :** Dimethyl:2H(4)13C(2) (N-term)

**T3 :** Phospho (ST), with neutral losses 0.0000(shown in table), 97.9769

**S5 :** Phospho (ST), with neutral losses 0.0000(shown in table), 97.9769

**S9 :** Phospho (ST), with neutral losses 0.0000(shown in table), 97.9769

**S11 :** Phospho (ST), with neutral losses 0.0000(shown in table), 97.9769

**Ions Score:** 51 **Expect:** 0.00019

**Matched b ions:** b(3), b(3)-98, b(5)-98, b(5)-196, b(6)-196, b(7)++, b(7), b(8), b(8)-98++, b(8)-98, b(9)-98, b(9)++, b(9)-98++, b(9)-294, b(9)-196, b(10)-98, b(10)-196, b(10)-196++, b(10)-294, b(11)-98, b(11)-196, b(11)-294, b(12)-196, b(12)-196++, b(12), b(12)-98, b(12)-294, b(12)-98++, b(12)-392, b(13)-98, b(13), b(13)-196++, b(14), b(14)-98++, b(14)++

**Matched y ions:** y(3), y(4), y(5), y(5)-98, y(6), y(6)-98, y(7)-196, y(7)-98, y(7), y(8), y(8)-98, y(8)-196, y(9)-196, y(9), y(9)-98, y(10), y(10)-196, y(10)-98, y(11), y(11)-98, y(11)-98++, y(12), y(12)-98, y(12)-196++, y(12)++, y(13), y(13)-294, y(13)-98++, y(13)++, y(13)-392, y(14)-392, y(14)-98, y(14), y(14)-196, y(14)-196++, y(14)-98++, y(14)++

**Precursor origin neutral loss:** +

## Peptide No.78

**AQSPTPSLPASWK**

**Confirmed sites:** @S:3

**Ambiguous sites:**

**MS/MS Fragmentation of AQSPTPSLPASWK**

Found in **SYNP2\_MOUSE**, Synaptopodin-2 OS=Mus musculus GN=Synpo2 PE=1 SV=2

Match to Query 2124: 1504.733350 from(753.373951,2+)

Title: Elution from: 45.885 to 45.885 scan no 4234 cid35.00 polarity+:MA10

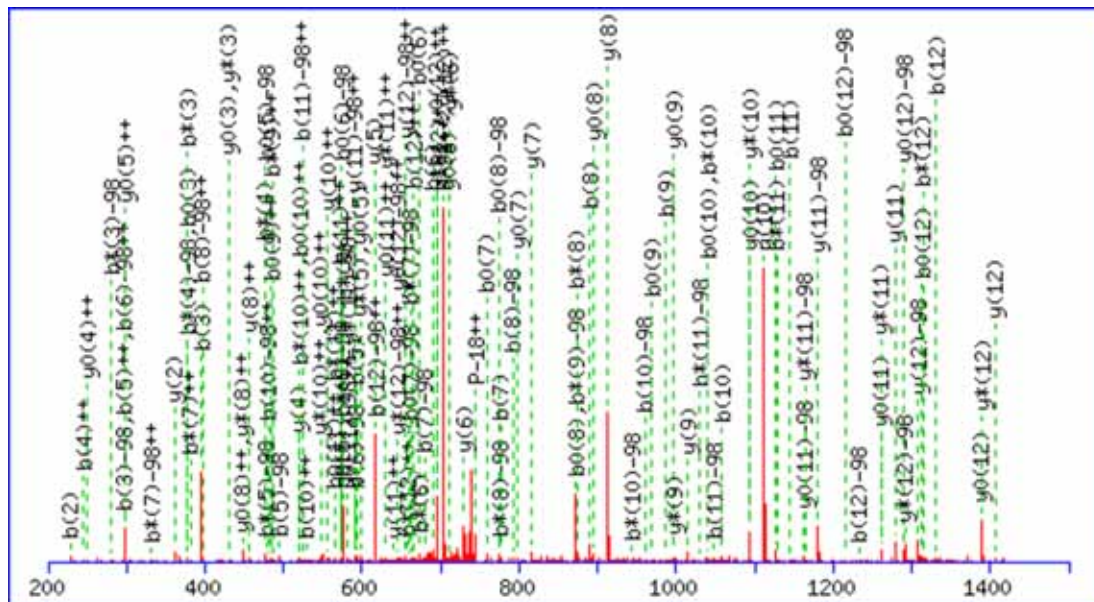

**Monoisotopic mass of neutral peptide Mr(calc):** 1504.7327

**Fixed modifications:** Carbamidomethyl (C) (apply to specified residues or termini only)

**Variable modifications:**

**N-term :** Dimethyl (N-term)

**S3 :** Phospho (ST), with neutral losses 97.9769(shown in table), 0.0000

**K13 :** Dimethyl (K)

**Ions Score:** 78 **Expect:** 7.9e-007

**Matched b ions:** b(2), b(3)-98, b(3), b(4)++, b(5)++, b(5)-98, b(5), b(6)-98, b(6)-98, b(6), b(7)-98, b(7), b(8), b(8)-98, b(8)-98, b(9), b(10), b(10)-98, b(10)-98, b(10)++, b(10)-98, b(11)++, b(11)-98, b(11)-98, b(11), b(12)-98, b(12), b(12)++, b(12)-98

**Matched y ions:** y(2), y(3), y(4), y(5), y(6), y(7), y(8), y(8)++, y(9), y(10), y(10)++, y(11)-98, y(11), y(11)-98, y(11)++, y(12)++, y(12)-98, y(12), y(12)-98

**Precursor origin neutral loss:** +

## Peptide No.79

**AQSPTPSLPASWK**

**Confirmed sites:** @S:3,@S:7

**Ambiguous sites:**

**MS/MS Fragmentation of AQSPTPSLPASWK**

Found in **SYNP2\_MOUSE**, Synaptopodin-2 OS=Mus musculus GN=Synpo2 PE=1 SV=2

Match to Query 2572: 1584.699770 from(793.357161,2+)

Title: Elution from: 49.958 to 49.958 scan no 4742 cid35.00 polarity:+:MA10



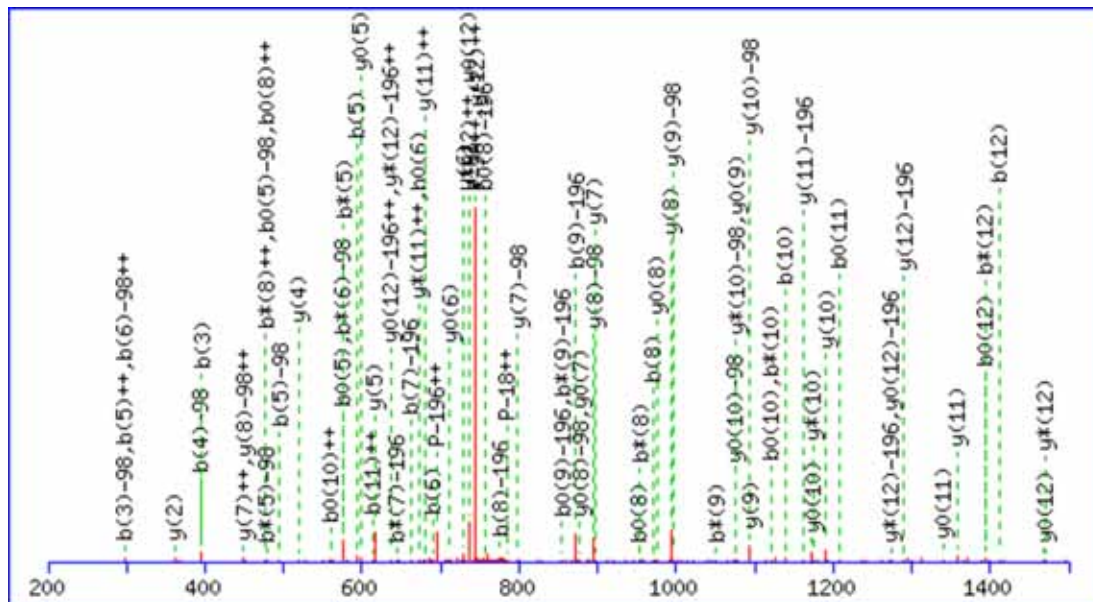

**Monoisotopic mass of neutral peptide Mr(calc):** 1584.6990

**Fixed modifications:** Carbamidomethyl (C) (apply to specified residues or termini only)

**Variable modifications:**

**N-term :** Dimethyl (N-term)

**S3 :** Phospho (ST), with neutral losses 0.0000(shown in table), 97.9769

**S7 :** Phospho (ST), with neutral losses 0.0000(shown in table), 97.9769

**K13 :** Dimethyl (K)

**Ions Score:** 67 **Expect:** 7.2e-006

**Matched b ions:** b(3), b(3)-98, b(4)-98, b(5)++, b(5)-98, b(5), b(6)-98, b(6), b(7)-98, b(7)-196, b(8)-98, b(8), b(8)-196, b(9)-196, b(9)-98, b(10)-98, b(10), b(11)-98, b(11)-98, b(11)++, b(12)-98, b(12)

**Matched y ions:** y(2), y(3), y(4), y(5), y(6), y(7)++, y(7), y(7)-98, y(8)-98, y(8)++, y(8), y(8)-98, y(9), y(9)-98, y(10)-98, y(10), y(11), y(11)-98, y(11)-196, y(11)++, y(12)++, y(12)-98, y(12)++, y(12)-196, y(12)-98

**Precursor origin neutral loss:** +

## Peptide No.80

**AQSPTPSLPASWK**

**Confirmed sites:** @S:3,@T:5

**Ambiguous sites:**

**MS/MS Fragmentation of AQSPTPSLPASWK**

Found in **SYNP2\_MOUSE**, Synaptopodin-2 OS=Mus musculus GN=Synpo2 PE=1 SV=2

Match to Query 2266: 1584.700278 from(793.357415,2+)

Title: Elution from: 49.574 to 49.574 scan no 4634 cid35.00 polarity:+:MA10

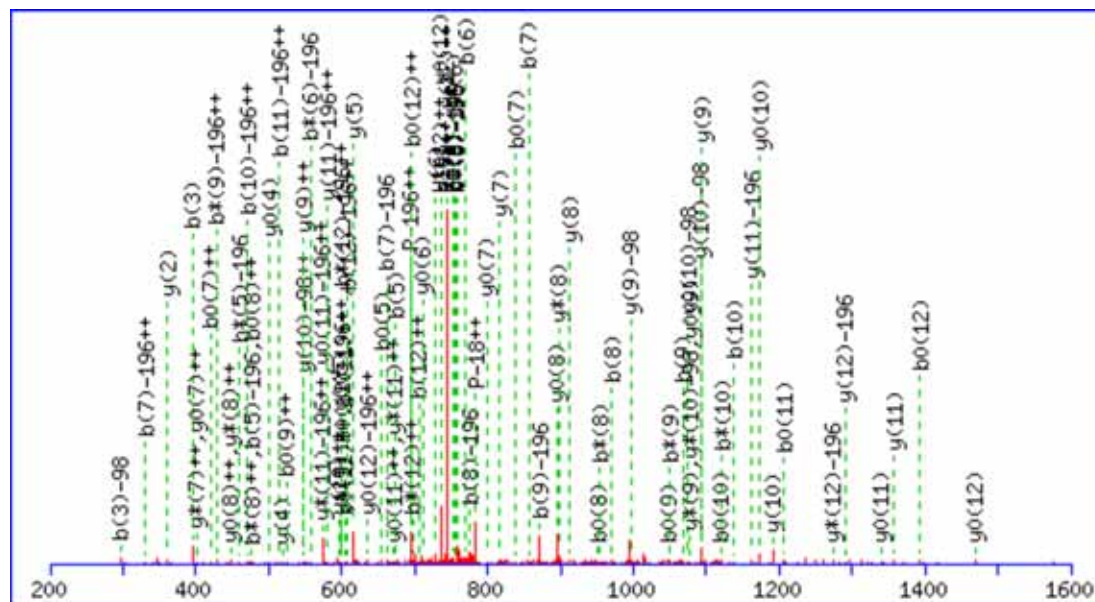

**Monoisotopic mass of neutral peptide Mr(calc):** 1584.6990

**Fixed modifications:** Carbamidomethyl (C) (apply to specified residues or termini only)

**Variable modifications:**

**N-term :** Dimethyl (N-term)

**S3 :** Phospho (ST), with neutral losses 97.9769(shown in table), 0.0000

**T5 :** Phospho (ST), with neutral losses 97.9769(shown in table), 0.0000

**K13 :** Dimethyl (K)

**Ions Score:** 31 **Expect:** 0.027

**Matched b ions:** b(3), b(3)-98, b(5)-98, b(5)-196, b(5), b(6)-98, b(6), b(7)-98, b(7)-196++, b(7)-196, b(7), b(8)-98, b(8)-196, b(8), b(9)-196, b(9)-98, b(9), b(10)-98, b(10), b(10)-196++, b(11)-196++, b(12)-98, b(12)-196++, b(12)++

**Matched y ions:** y(2), y(3), y(4), y(5), y(6), y(7), y(8), y(9)++, y(9), y(9)-98, y(10)-98, y(10), y(10)-98++, y(10)++, y(11)-98, y(11), y(11)-196, y(11)-196++, y(11)-98++, y(12)++, y(12)-98++, y(12)-196

**Precursor origin neutral loss:** +

## Peptide No.81

**AQSPTPSLPASWK**

**Confirmed sites:** @S:3

**Ambiguous sites:**

**MS/MS Fragmentation of AQSPTPSLPASWK**

Found in **SYNP2\_MOUSE**, Synaptopodin-2 OS=Mus musculus GN=Synpo2 PE=1 SV=2

Match to Query 3295: 1516.796734 from(759.405643,2+)

Title: Elution from: 45.828 to 45.828 scan no 4417 cid35.00 polarity:+:MA10

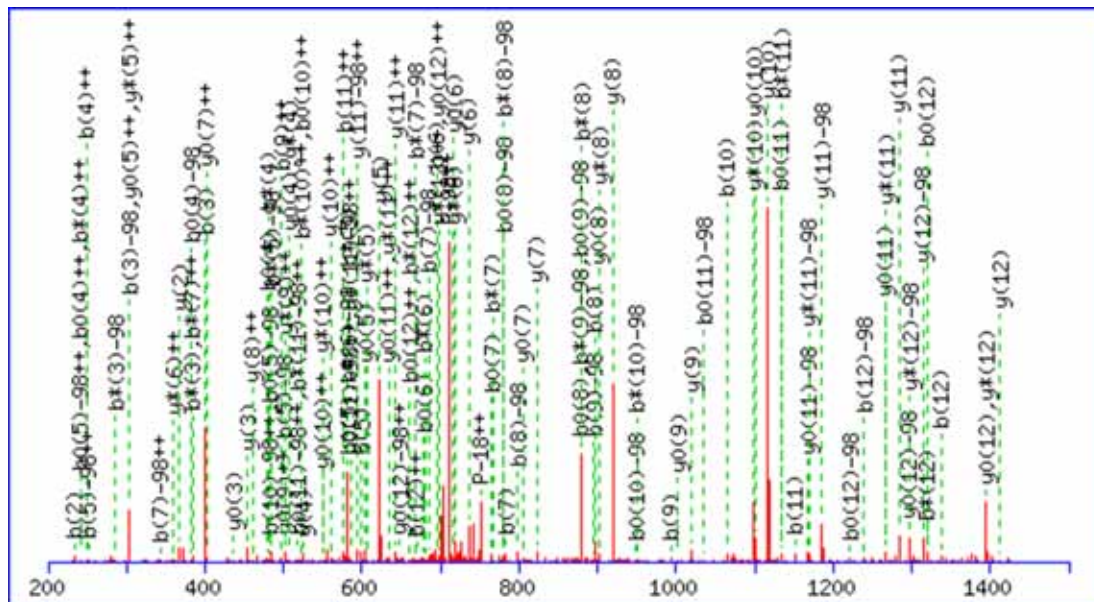

**Monoisotopic mass of neutral peptide Mr(calc):** 1516.7963

**Fixed modifications:** Carbamidomethyl (C) (apply to specified residues or termini only)

**Variable modifications:**

**N-term :** Dimethyl:2H(4)13C(2) (N-term)

**S3 :** Phospho (ST), with neutral losses 97.9769(shown in table), 0.0000

**K13 :** Dimethyl:2H(4)13C(2) (K)

**Ions Score:** 65 **Expect:** 1.4e-005

**Matched b ions:** b(2), b(3)-98, b(3), b(4)++, b(5)-98, b(5), b(5)-98++, b(6), b(7), b(7)-98++, b(7)-98, b(8), b(8)-98, b(9), b(9)++, b(9)-98, b(10)-98++, b(10), b(11), b(11)++, b(12), b(12)++, b(12)-98

**Matched y ions:** y(2), y(3), y(4), y(5), y(6), y(7), y(8), y(8)++, y(9), y(10), y(10)++, y(11)-98, y(11), y(11)-98++, y(11)++, y(12)-98, y(12)

**Precursor origin neutral loss:** +

## Peptide No.82

**AQSPTPSLPASWK**

**Confirmed sites:** @S:3,@S:7

**Ambiguous sites:**

**MS/MS Fragmentation of AQSPTPSLPASWK**

Found in **SYNP2\_MOUSE**, Synaptopodin-2 OS=Mus musculus GN=Synpo2 PE=1 SV=2

Match to Query 2271: 1596.764178 from(799.389365,2+)

Title: Elution from: 49.930 to 49.930 scan no 4665 cid35.00 polarity:+:MA10

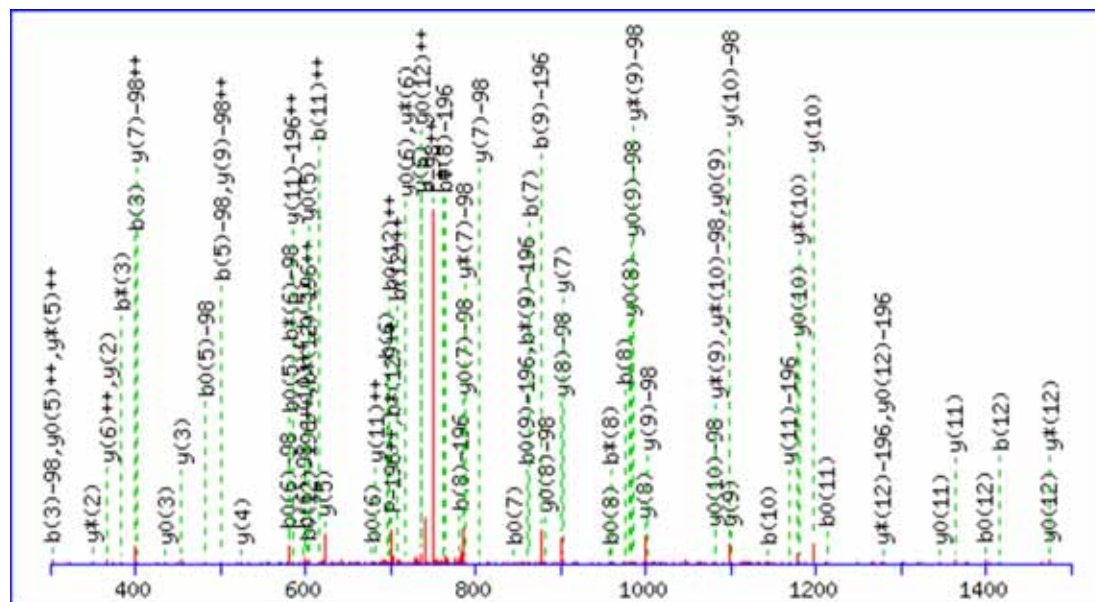

**Monoisotopic mass of neutral peptide Mr(calc):** 1596.7626

**Fixed modifications:** Carbamidomethyl (C) (apply to specified residues or termini only)

**Variable modifications:**

**N-term :** Dimethyl:2H(4)13C(2) (N-term)

**S3 :** Phospho (ST), with neutral losses 0.0000(shown in table), 97.9769

**S7 :** Phospho (ST), with neutral losses 0.0000(shown in table), 97.9769

**K13 :** Dimethyl:2H(4)13C(2) (K)

**Ions Score:** 41 **Expect:** 0.0046

**Matched b ions:** b(3), b(3)-98, b(5), b(5)-98, b(6)-98, b(6), b(7)-98, b(7), b(8)-98, b(8), b(8)-196, b(9)-98, b(9)-196, b(10)-98, b(10)-98++, b(10), b(11)-98, b(11)++, b(12), b(12)-98, b(12)++

**Matched y ions:** y(2), y(3), y(4), y(5), y(6)++, y(6), y(7), y(7)-98++, y(7)-98, y(8), y(8)-98, y(9)-98++, y(9), y(9)-98, y(10)-98, y(10), y(10)++, y(11)-98, y(11), y(11)-196, y(11)-196++, y(11)-98++, y(11)++

**Precursor origin neutral loss:** +

## Peptide No.83

**ASAPLPGFSAPGR**

**Confirmed sites:** @S:2

**Ambiguous sites:**

**MS/MS Fragmentation of ASAPLPGFSAPGR**

Found in **HSPB6\_MOUSE**, Heat shock protein beta-6 OS=Mus musculus GN=Hspb6 PE=1 SV=1

Match to Query 1761: 1334.638612 from(668.326582,2+)

Title: Elution from: 45.555 to 45.555 scan no 4369 cid35.00 polarity:+:MA10



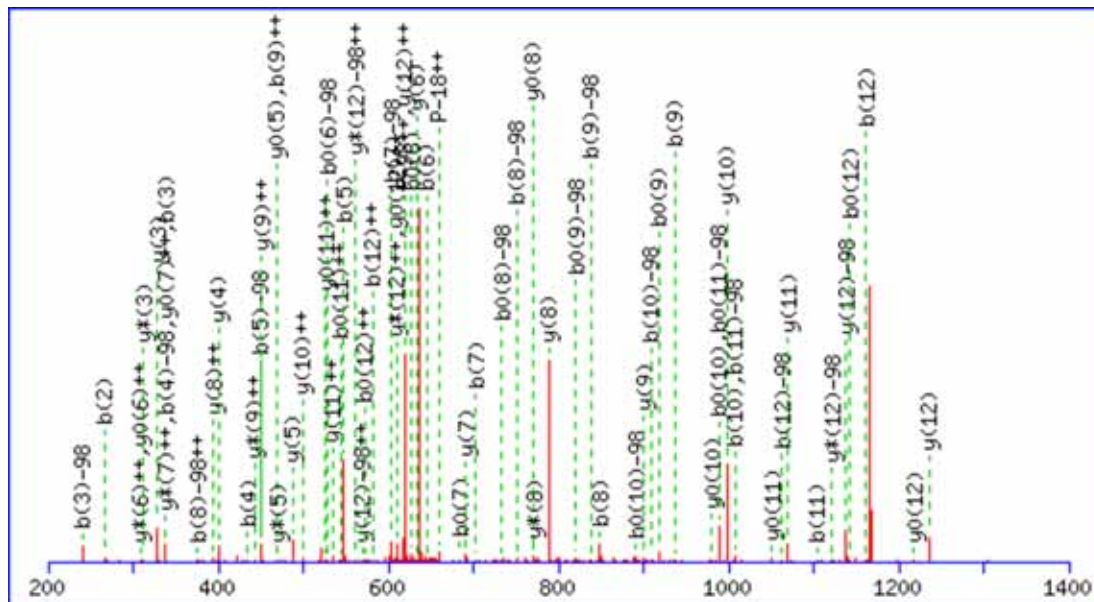

**Monoisotopic mass of neutral peptide Mr(calc):** 1334.6384

**Fixed modifications:** Carbamidomethyl (C) (apply to specified residues or termini only)

**Variable modifications:**

**N-term :** Dimethyl (N-term)

**S2 :** Phospho (ST), with neutral losses 97.9769(shown in table), 0.0000

**Ions Score:** 59 **Expect:** 4.2e-005

**Matched b ions:** b(2), b(3), b(3)-98, b(4)-98, b(4), b(5)-98, b(5), b(6), b(7)-98, b(7), b(8), b(8)-98, b(8)-98++, b(9)++, b(9)-98, b(9), b(10), b(10)-98, b(11)-98, b(11), b(12), b(12)++, b(12)-98

**Matched y ions:** y(3), y(4), y(5), y(6), y(7), y(8), y(8)++, y(9)++, y(9), y(10), y(10)++, y(11), y(11)++, y(12)-98, y(12)++, y(12), y(12)-98++

**Precursor origin neutral loss:** +

## Peptide No.84

**ASAPLPGFSAPGR**

**Confirmed sites:** @S:2

**Ambiguous sites:**

**MS/MS Fragmentation of ASAPLPGFSAPGR**

Found in **HSPB6\_MOUSE**, Heat shock protein beta-6 OS=Mus musculus GN=Hspb6 PE=1 SV=1

Match to Query 1130: 1340.671252 from(671.342902,2+)

Title: Elution from: 45.484 to 45.484 scan no 4058 cid35.00 polarity:+:MA10

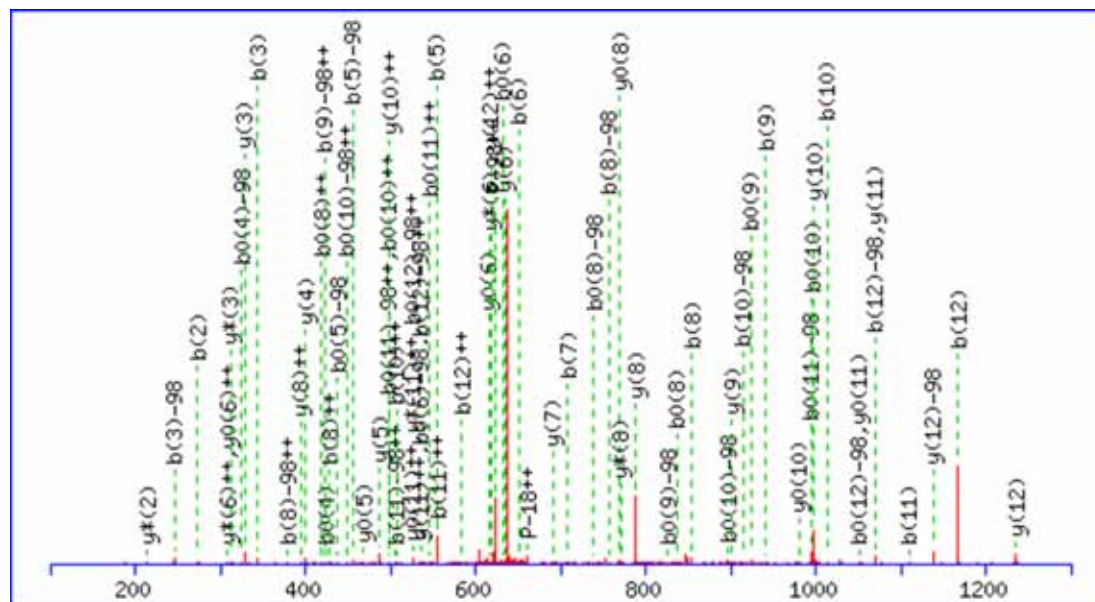

**Monoisotopic mass of neutral peptide Mr(calc):** 1340.6702

**Fixed modifications:** Carbamidomethyl (C) (apply to specified residues or termini only)

**Variable modifications:**

**N-term :** Dimethyl:2H(4)13C(2) (N-term)

**S2 :** Phospho (ST), with neutral losses 97.9769(shown in table), 0.0000

**Ions Score:** 56 **Expect:** 8.4e-005

**Matched b ions:** b(2), b(3)-98, b(3), b(5), b(5)-98, b(6), b(7), b(8), b(8)++, b(8)-98, b(8)-98++, b(9), b(9)-98++, b(10), b(10)++, b(10)-98, b(11)++, b(11), b(11)-98++, b(12)-98, b(12), b(12)-98++, b(12)++

**Matched y ions:** y(3), y(4), y(5), y(6), y(7), y(8), y(8)++, y(9), y(10), y(10)++, y(11), y(11)++, y(12), y(12)-98, y(12)++

**Precursor origin neutral loss:** +

## Peptide No.85

**ASSVSSVPVSI**

**Confirmed sites:** @S:2,@S:6

**Ambiguous sites:**

MS/MS Fragmentation of **ASSVSSVPVSI**

Found in **KLH31\_MOUSE**, Kelch-like protein 31 OS=Mus musculus GN=Klhl31 PE=1 SV=1

Match to Query 896: 1219.514830 from(610.764691,2+)

Title: Elution from: 54.567 to 54.567 scan no 5159 cid35.00 polarity:+:MA10

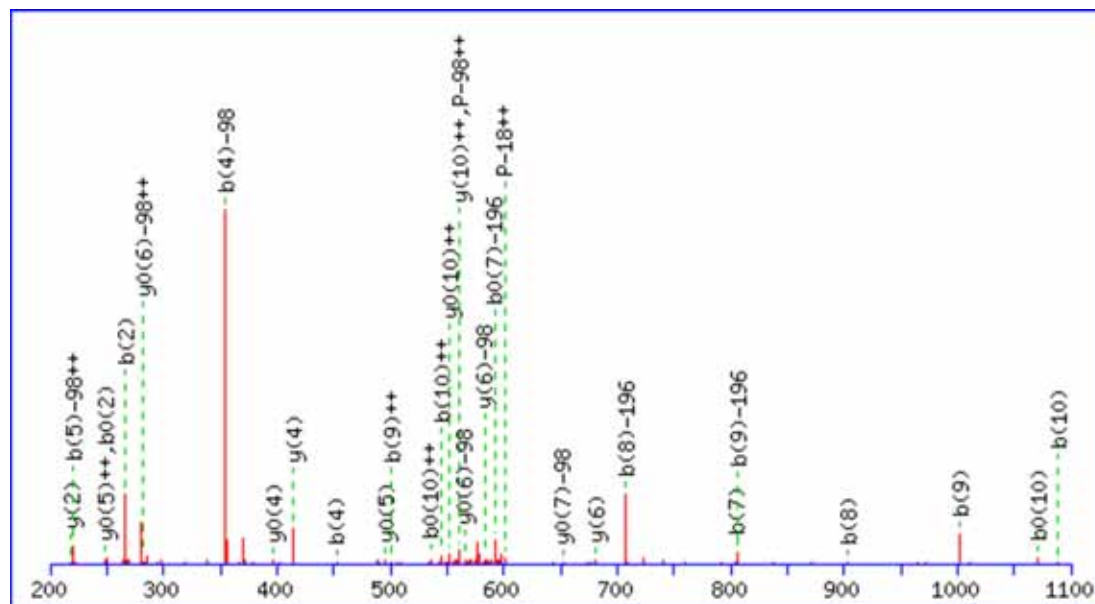

**Monoisotopic mass of neutral peptide Mr(calc):** 1219.5138

**Fixed modifications:** Carbamidomethyl (C) (apply to specified residues or termini only)

**Variable modifications:**

**N-term :** Dimethyl (N-term)

**S2 :** Phospho (ST), with neutral losses 0.0000(shown in table), 97.9769

**S6 :** Phospho (ST), with neutral losses 0.0000(shown in table), 97.9769

**Ions Score:** 26 **Expect:** 0.043

**Matched b ions:** b(2), b(4)-98, b(4), b(5)-98++, b(7)-98++, b(7)-98, b(7), b(8)-196, b(8)-98, b(8), b(9), b(9)-196, b(9)++, b(9)-98++, b(10)-98++, b(10), b(10)++

**Matched y ions:** y(2), y(4), y(6), y(6)-98, y(10)++

**Precursor origin neutral loss:**

## Peptide No.86

**ASSVSSVPVSI**

**Confirmed sites:** @S:6,@S:10

**Ambiguous sites:** @S:2orS:3orS:5

MS/MS Fragmentation of **ASSVSSVPVSI**

Found in **KLH31\_MOUSE**, Kelch-like protein 31 OS=Mus musculus GN=Klhl31 PE=1 SV=1

Match to Query 1628: 1299.481048 from(650.747800,2+)

Title: Elution from: 57.001 to 57.001 scan no 5655 cid35.00 polarity:+:MA10

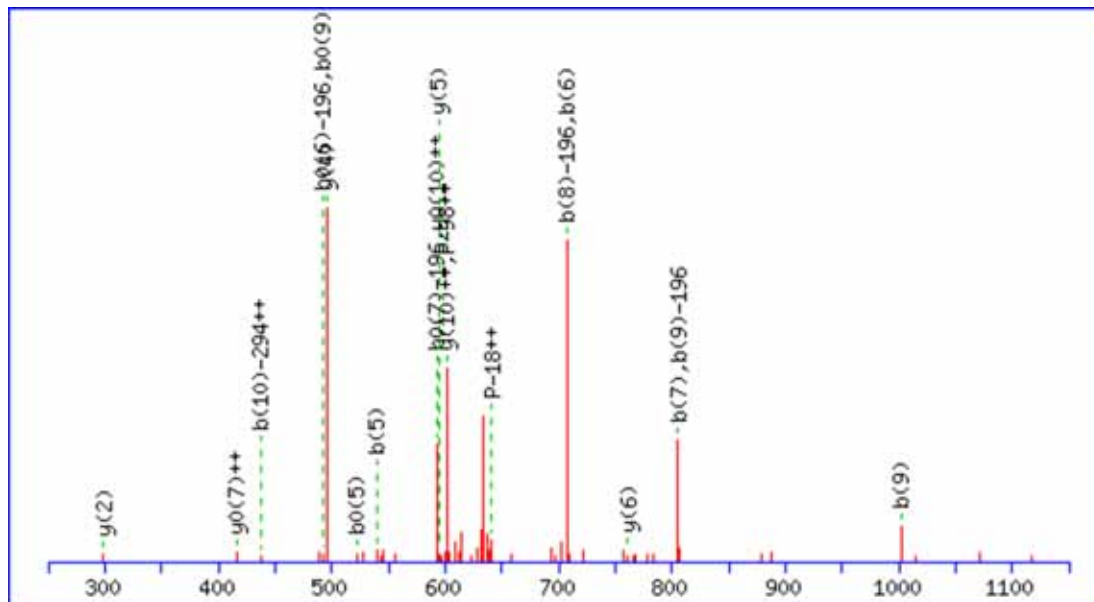

**Monoisotopic mass of neutral peptide Mr(calc):** 1299.4802

**Fixed modifications:** Carbamidomethyl (C) (apply to specified residues or termini only)

**Variable modifications:**

**N-term :** Dimethyl (N-term)

**S3 :** Phospho (ST), with neutral losses 0.0000(shown in table), 97.9769

**S6 :** Phospho (ST), with neutral losses 0.0000(shown in table), 97.9769

**S10 :** Phospho (ST), with neutral losses 0.0000(shown in table), 97.9769

**Ions Score:** 28 **Expect:** 0.014

**Matched b ions:** b(5), b(6), b(6)-98, b(7)-98, b(7), b(8)-98, b(8)-196, b(9)-196, b(9), b(10)-98, b(10)-294++

**Matched y ions:** y(2), y(4), y(5), y(6), y(10)++

**Precursor origin neutral loss:** +

## Peptide No.87

**ASSVSSVPVSI**

**Confirmed sites:** @S:10

**Ambiguous sites:** @S:2orS:3

MS/MS Fragmentation of **ASSVSSVPVSI**

Found in **KLH31\_MOUSE**, Kelch-like protein 31 OS=Mus musculus GN=Klhl31 PE=1 SV=1

Match to Query 1153: 1225.545810 from(613.780181,2+)

Title: Elution from: 53.436 to 53.436 scan no 5113 cid35.00 polarity:+:MA10



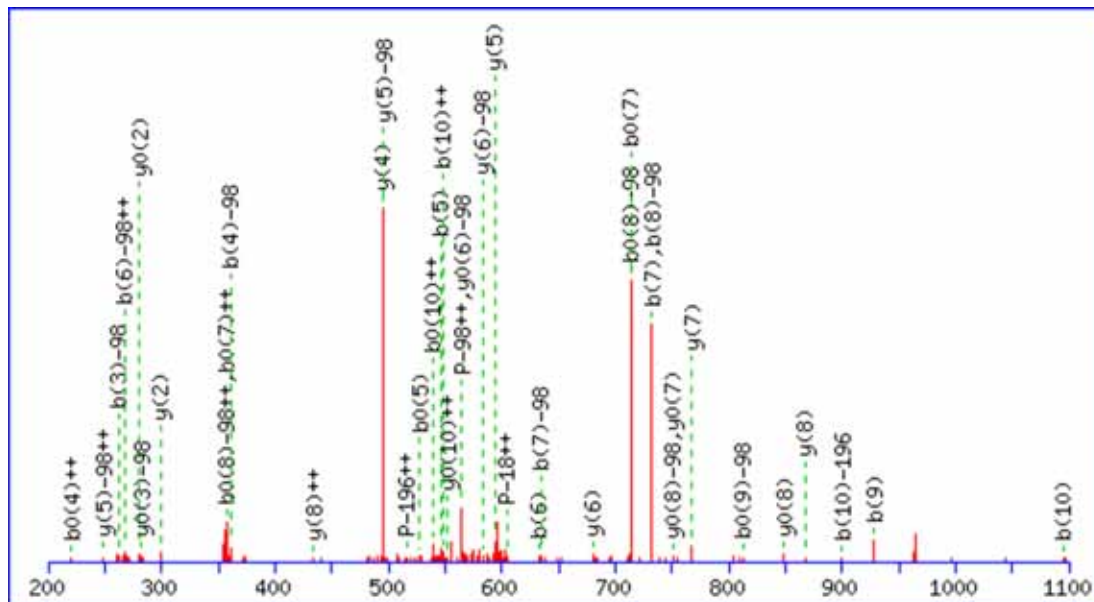

**Monoisotopic mass of neutral peptide Mr(calc):** 1225.5457

**Fixed modifications:** Carbamidomethyl (C) (apply to specified residues or termini only)

**Variable modifications:**

**N-term :** Dimethyl:2H(4)13C(2) (N-term)

**S3 :** Phospho (ST), with neutral losses 0.0000(shown in table), 97.9769

**S10 :** Phospho (ST), with neutral losses 0.0000(shown in table), 97.9769

**Ions Score:** 38 **Expect:** 0.0038

**Matched b ions:** b(3)-98, b(4)-98, b(5), b(6)-98++, b(6), b(7), b(7)-98, b(8)-98, b(9), b(10), b(10)-196, b(10)-98, b(10)-98++, b(10)++

**Matched y ions:** y(2), y(4), y(5)-98, y(5), y(5)-98++, y(6), y(6)-98, y(7), y(8), y(8)++

**Precursor origin neutral loss:** +

## Peptide No.88

**ATAPQTQHVSPMR**

**Confirmed sites:** @S:10

**Ambiguous sites:**

MS/MS Fragmentation of **ATAPQTQHVSPMR**

Found in **EF1D\_MOUSE**, Elongation factor 1-delta OS=Mus musculus GN=Eef1d PE=1 SV=3

Match to Query 2108: 1546.696851 from(516.572893,3+)

Title: Elution from: 21.291 to 21.291 scan no 1064 cid35.00 polarity:+:MA10:m1s

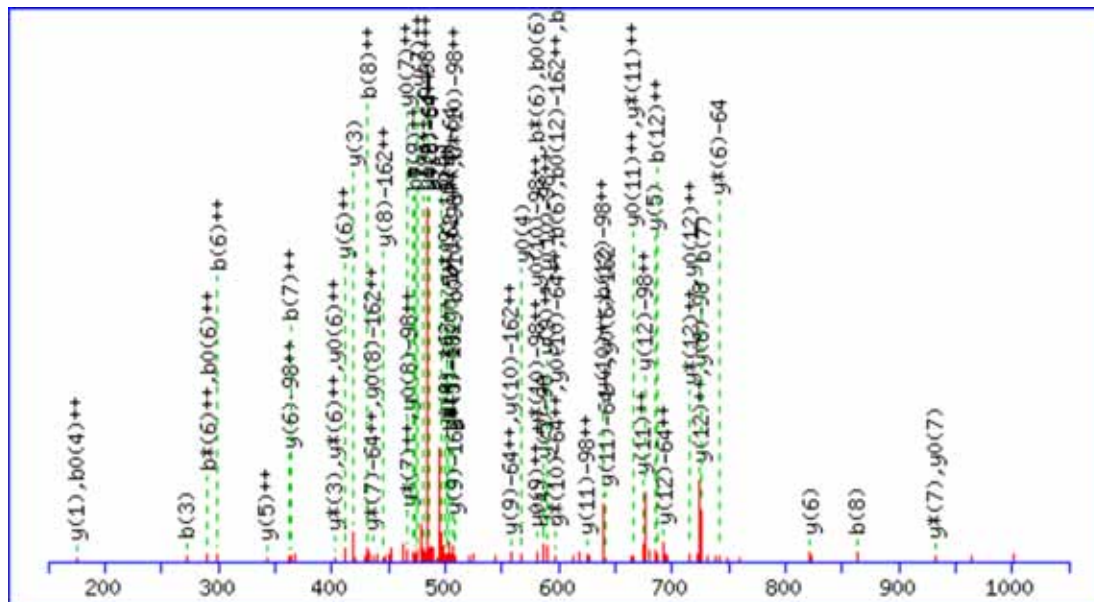

**Monoisotopic mass of neutral peptide Mr(calc):** 1546.6963

**Fixed modifications:** Carbamidomethyl (C) (apply to specified residues or termini only)

**Variable modifications:**

**N-term :** Dimethyl (N-term)

**S10 :** Phospho (ST), with neutral losses 0.0000(shown in table), 97.9769

**M12 :** Oxidation (M), with neutral losses 0.0000(shown in table), 63.9983

**Ions Score:** 40 **Expect:** 0.0039

**Matched b ions:** b(3), b(5), b(6)++, b(6), b(7)++, b(7), b(8), b(8)++, b(9)++, b(12)-98++, b(12)++

**Matched y ions:** y(1), y(3), y(4), y(5)-98, y(5)++, y(5), y(6)-98, y(6), y(6)++, y(6)-98++, y(7)++, y(9)++, y(10)++, y(10)-98++, y(11)++, y(11)-98++, y(12)++, y(12)-98++

**Precursor origin neutral loss:** +

## Peptide No.89

**ATDAEADVASLNR**

**Confirmed sites:** @S:10

**Ambiguous sites:**

**MS/MS Fragmentation of ATDAEADVASLNR**

Found in **TPM2\_MOUSE**, Tropomyosin beta chain OS=Mus musculus GN=Tpm2 PE=1 SV=1

Match to Query 2204: 1439.629504 from(720.822028,2+)

Title: Elution from: 33.513 to 33.513 scan no 2784 cid35.00 polarity:+:MA10

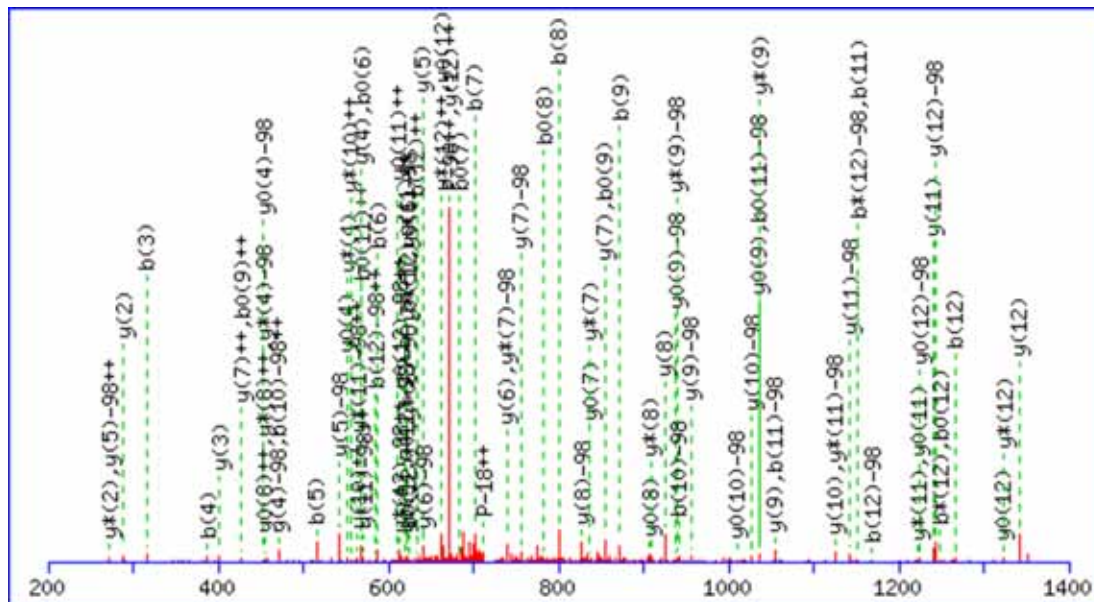

**Monoisotopic mass of neutral peptide Mr(calc): 1439.6293**

**Fixed modifications:** Carbamidomethyl (C) (apply to specified residues or termini only)

**Variable modifications:**

**N-term :** Dimethyl (N-term)

**S10 :** Phospho (ST), with neutral losses 97.9769(shown in table), 0.0000

**Ions Score:** 75 **Expect:** 7.4e-007

**Matched b ions:** b(3), b(4), b(5), b(6), b(7), b(8), b(9), b(10)-98++, b(10)-98, b(11)-98, b(11), b(12), b(12)-98, b(12)-98++, b(12)++

**Matched y ions:** y(2), y(3), y(4)-98, y(4), y(5)-98, y(5)-98++, y(5), y(6)-98, y(6), y(7), y(7)++, y(7)-98, y(8), y(8)-98, y(9), y(9)-98, y(10), y(10)-98, y(10)++, y(11)-98, y(11), y(11)-98++, y(11)++, y(12)++, y(12)-98, y(12), y(12)-98++

**Precursor origin neutral loss:** +

## Peptide No.90

**ATEPSGTGSDELIK**

**Confirmed sites:** @S:10

**Ambiguous sites:**

**MS/MS Fragmentation of ATEPSGTGSDELIK**

Found in **PTRF\_MOUSE**, Polymerase I and transcript release factor OS=Mus musculus GN=Ptrf PE=1 SV=1

Match to Query 4228: 1668.750606 from(835.382579,2+)

Title: Elution from: 35.661 to 35.661 scan no 3019 cid35.00 polarity:+:MA10

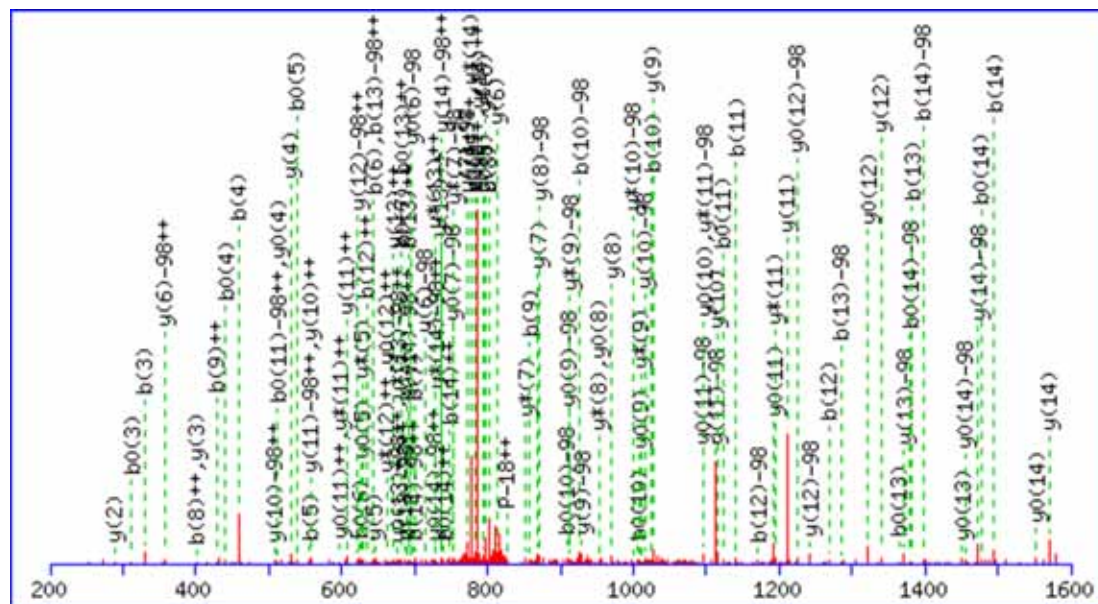

**Monoisotopic mass of neutral peptide Mr(calc):** 1668.7495

**Fixed modifications:** Carbamidomethyl (C) (apply to specified residues or termini only)

**Variable modifications:**

**N-term :** Dimethyl (N-term)

**S10 :** Phospho (ST), with neutral losses 97.9769(shown in table), 0.0000

**K15 :** Dimethyl (K)

**Ions Score:** 87 **Expect:** 7.5e-008

**Matched b ions:** b(3), b(4), b(5), b(6), b(7), b(8)++, b(8), b(9)++, b(9), b(10)-98, b(10), b(11), b(12), b(12)-98, b(12)++, b(13)-98++, b(13)-98, b(13)++, b(13), b(14), b(14)++, b(14)-98, b(14)-98++

**Matched y ions:** y(2), y(3), y(4), y(5), y(6)-98++, y(6)-98, y(6), y(7), y(7)-98, y(8), y(8)-98, y(9), y(9)-98, y(10)++, y(10), y(10)-98, y(10)-98++, y(11)++, y(11)-98, y(11), y(11)-98++, y(12), y(12)-98, y(12)-98++, y(12)++, y(13)-98, y(13)++, y(13)-98++, y(14)++, y(14)-98, y(14), y(14)-98++

**Precursor origin neutral loss:** +

## Peptide No.91

**A**TEPSGTGS**DEL**IK

**Confirmed sites:** @S:6,@S:10

**Ambiguous sites:**

**MS/MS Fragmentation of** ATEPSGTGSDEL**IK**

Found in **PTRF\_MOUSE**, Polymerase I and transcript release factor OS=Mus musculus GN=Ptrf PE=1 SV=1

Match to Query 4032: 1748.715664 from(875.365108,2+)

Title: Elution from: 39.877 to 39.877 scan no 3649 cid35.00 polarity:+:MA10



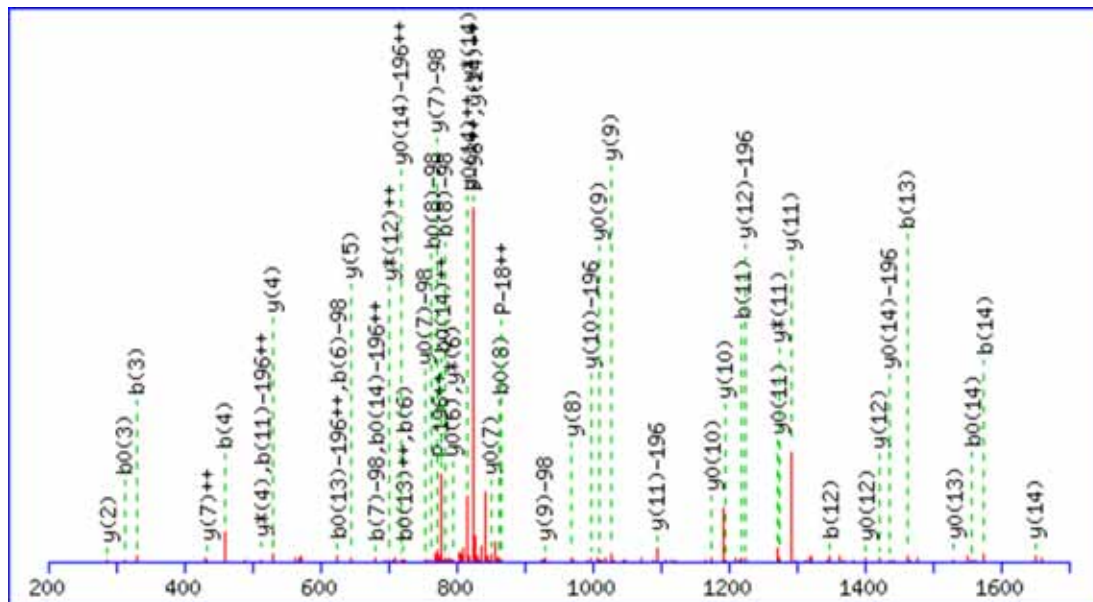

**Monoisotopic mass of neutral peptide Mr(calc):** 1748.7158

**Fixed modifications:** Carbamidomethyl (C) (apply to specified residues or termini only)

**Variable modifications:**

**N-term :** Dimethyl (N-term)

**S6 :** Phospho (ST), with neutral losses 0.0000(shown in table), 97.9769

**S10 :** Phospho (ST), with neutral losses 0.0000(shown in table), 97.9769

**K15 :** Dimethyl (K)

**Ions Score:** 40 **Expect:** 0.0027

**Matched b ions:** b(3), b(4), b(6)-98, b(6), b(7)-98, b(8)-98, b(11)-98++, b(11)-98, b(11), b(11)-196++, b(12), b(13), b(13)-98, b(13)-98++, b(14), b(14)-98

**Matched y ions:** y(2), y(4), y(5), y(7)-98, y(7)++, y(8), y(9), y(9)-98, y(10)-196, y(10)-98, y(10), y(11)-196, y(11)-98, y(11), y(12)-196, y(12)-98, y(12), y(13)-98++, y(14)-98++, y(14)++, y(14), y(14)-98

**Precursor origin neutral loss:** +

## Peptide No.92

**A**TEPSGTGSDEL**I**K

**Confirmed sites:** @S:6,@T:8

**Ambiguous sites:**

MS/MS Fragmentation of **A**TEPSGTGSDEL**I**K

Found in **P**TRF\_**M**OUSE, Polymerase I and transcript release factor OS=Mus musculus GN=Ptrf PE=1 SV=1

Match to Query 4034: 1748.716896 from(875.365724,2+)

Title: Elution from: 39.522 to 39.522 scan no 3602 cid35.00 polarity:+:MA10



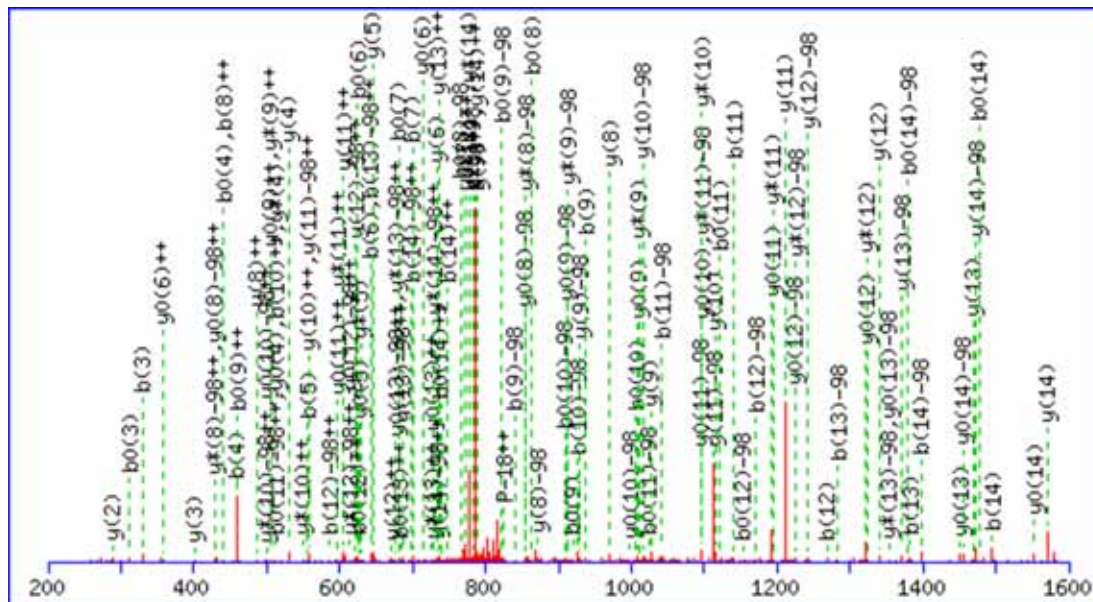

**Monoisotopic mass of neutral peptide Mr(calc):** 1668.7495

**Fixed modifications:** Carbamidomethyl (C) (apply to specified residues or termini only)

**Variable modifications:**

**N-term :** Dimethyl (N-term)

**T8 :** Phospho (ST), with neutral losses 97.9769(shown in table), 0.0000

**K15 :** Dimethyl (K)

**Ions Score:** 82 **Expect:** 2.3e-007

**Matched b ions:** b(3), b(4), b(5), b(6), b(7), b(8)++, b(8)-98, b(9)-98, b(9), b(10)-98, b(10)++, b(11)-98, b(11), b(12), b(12)-98, b(12)-98++, b(13)-98++, b(13)-98, b(13), b(14)-98, b(14), b(14)-98++, b(14)++

**Matched y ions:** y(2), y(3), y(4), y(5), y(6), y(7), y(8), y(8)-98, y(8)++, y(9), y(9)-98, y(10)++, y(10)-98, y(10), y(11)-98, y(11), y(11)++, y(11)-98++, y(12), y(12)-98, y(12)-98++, y(12)++, y(13)++, y(13)-98, y(13)-98++, y(13), y(14)-98++, y(14)++, y(14)-98, y(14)

**Precursor origin neutral loss:** +

## Peptide No.94

**A**TEPSGTGS**D**ELIK

**Confirmed sites:** @T:8,@S:10

**Ambiguous sites:**

MS/MS Fragmentation of **A**TEPSGTGS**D**ELIK

Found in **P**TRF\_**M**OUSE, Polymerase I and transcript release factor OS=Mus musculus GN=Ptrf PE=1 SV=1

Match to Query 3450: 1748.717998 from(875.366275,2+)

Title: Elution from: 38.741 to 38.741 scan no 3335 cid35.00 polarity:+:MA10:m1s

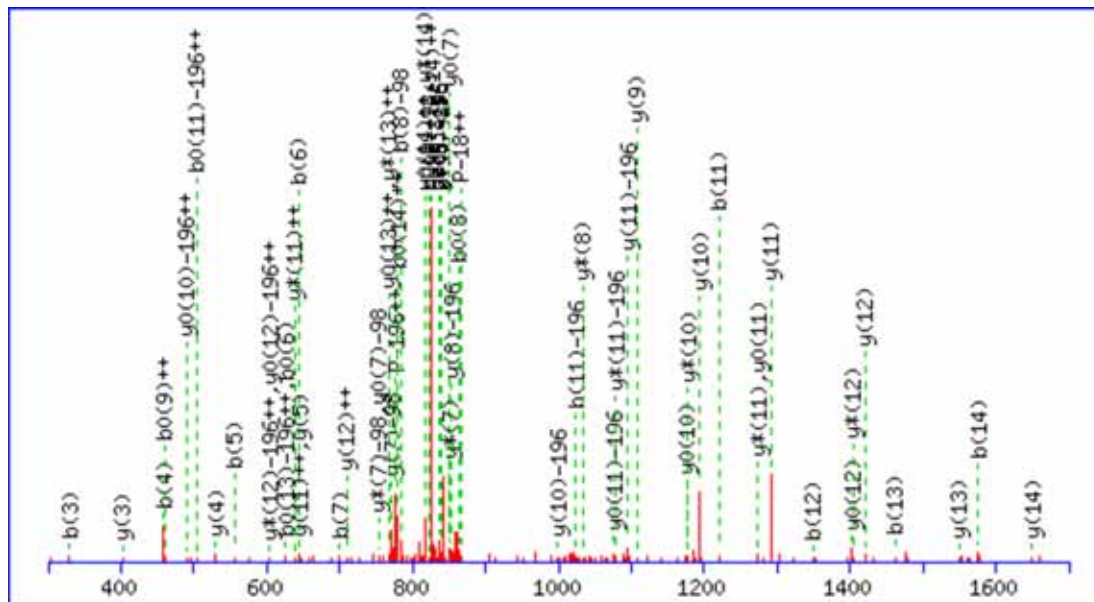

**Monoisotopic mass of neutral peptide Mr(calc):** 1748.7158

**Fixed modifications:** Carbamidomethyl (C) (apply to specified residues or termini only)

**Variable modifications:**

**N-term :** Dimethyl (N-term)

**T8 :** Phospho (ST), with neutral losses 0.0000(shown in table), 97.9769

**S10 :** Phospho (ST), with neutral losses 0.0000(shown in table), 97.9769

**K15 :** Dimethyl (K)

**Ions Score:** 39 **Expect:** 0.004

**Matched b ions:** b(3), b(4), b(5), b(6), b(7), b(8)-98, b(9)-98, b(10)-98++, b(10)-98, b(11), b(11)-98, b(11)-196, b(12), b(13), b(14)-98, b(14)

**Matched y ions:** y(3), y(4), y(5), y(7)-98, y(8)-98, y(8)-196, y(9), y(9)-98, y(10), y(10)-196, y(10)-98, y(11)++, y(11)-196, y(11)-98, y(11), y(12), y(12)-98, y(12)++, y(13), y(13)-98++, y(14)-98++, y(14)++, y(14)-98, y(14)

**Precursor origin neutral loss:** +

## Peptide No.95

**A**TEEPSGTGS**D**ELIK

**Confirmed sites:** @S:6,@S:10

**Ambiguous sites:**

MS/MS Fragmentation of **A**TEEPSGTGS**D**ELIK

Found in **P**TRF\_**M**OUSE, Polymerase I and transcript release factor OS=Mus musculus GN=Ptrf PE=1 SV=1

Match to Query 3062: 1760.780712 from(881.397632,2+)

Title: Elution from: 39.459 to 39.459 scan no 3383 cid35.00 polarity:+:MA10



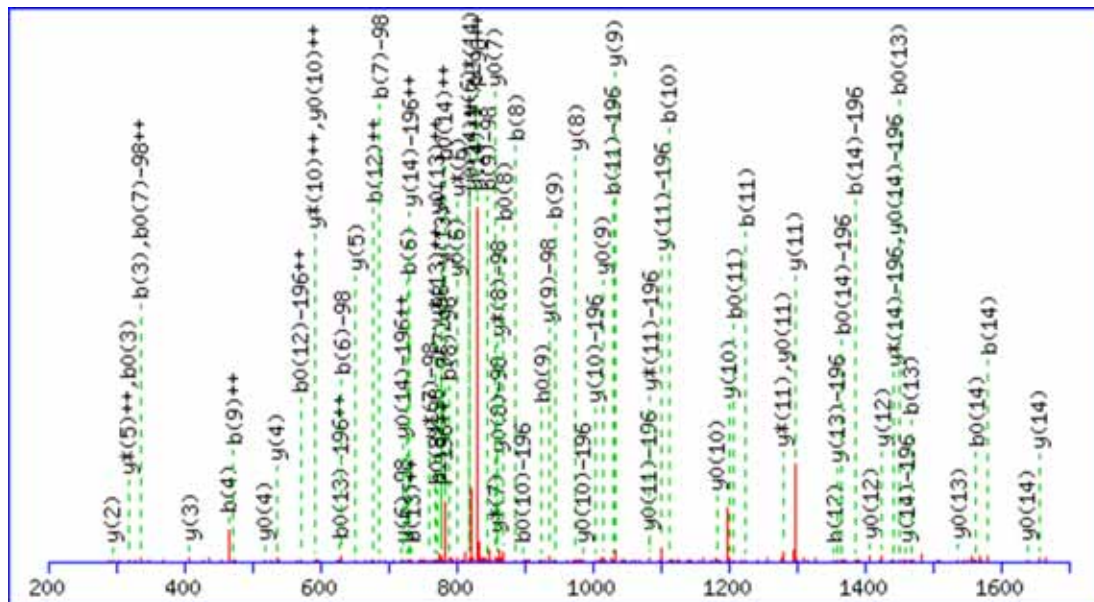

**Monoisotopic mass of neutral peptide Mr(calc):** 1760.7794

**Fixed modifications:** Carbamidomethyl (C) (apply to specified residues or termini only)

**Variable modifications:**

**N-term :** Dimethyl:2H(4)13C(2) (N-term)

**S6 :** Phospho (ST), with neutral losses 0.0000(shown in table), 97.9769

**S10 :** Phospho (ST), with neutral losses 0.0000(shown in table), 97.9769

**K15 :** Dimethyl:2H(4)13C(2) (K)

**Ions Score:** 45 **Expect:** 0.0012

**Matched b ions:** b(3), b(4), b(6)-98, b(6), b(7)-98, b(8)-98, b(8), b(9), b(9)++, b(9)-98, b(10)-98, b(10), b(11), b(11)-98, b(11)-196, b(12)-98, b(12), b(12)++, b(12)-98, b(13), b(13)-98, b(13)++, b(14)-98, b(14), b(14)-196

**Matched y ions:** y(2), y(3), y(4), y(5), y(6)-98, y(6), y(7)-98, y(8), y(9)-98, y(9), y(10), y(10)-98, y(10)-196, y(11)-196, y(11)-98, y(11), y(12), y(12)-98, y(12)-98, y(13)-98, y(13)-98, y(13)++, y(14)-98, y(14), y(14)-196, y(14)-98, y(14)++, y(14)++

**Precursor origin neutral loss:** +

## Peptide No.96

**A**TEEPSGTGSDEL**I**K

**Confirmed sites:** @S:6,@T:8

**Ambiguous sites:**

MS/MS Fragmentation of **A**TEEPSGTGSDEL**I**K

Found in **P**TRF\_MOUSE, Polymerase I and transcript release factor OS=Mus musculus GN=Ptrf PE=1 SV=1

Match to Query 4713: 1760.779816 from(881.397184,2+)

Title: Elution from: 39.067 to 39.067 scan no 3507 cid35.00 polarity:+:MA10

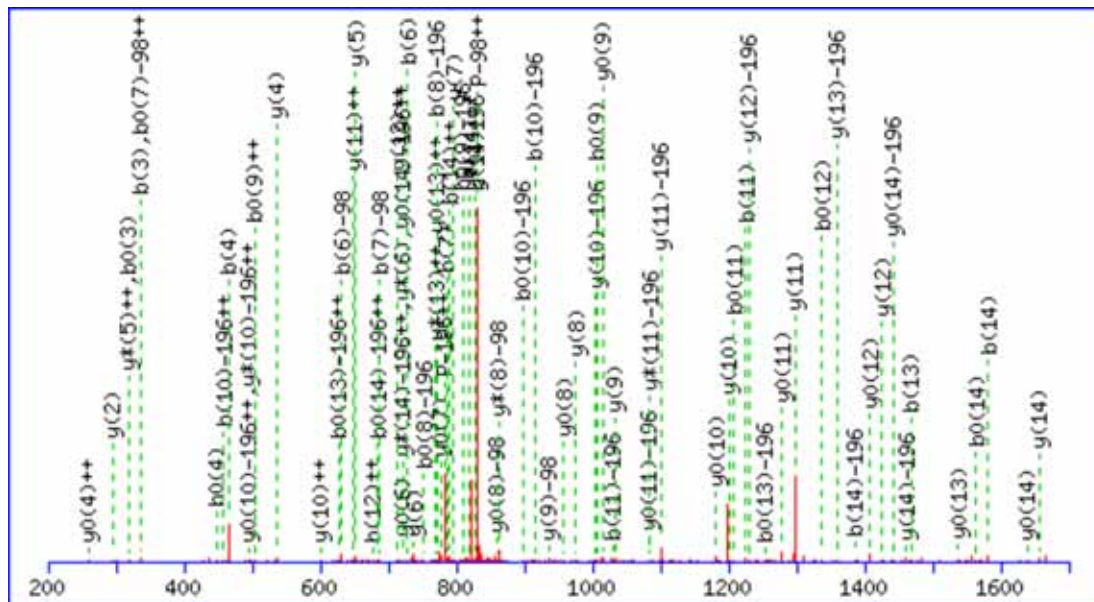

**Monoisotopic mass of neutral peptide Mr(calc):** 1760.7794

**Fixed modifications:** Carbamidomethyl (C) (apply to specified residues or termini only)

**Variable modifications:**

**N-term :** Dimethyl:2H(4)13C(2) (N-term)

**S6 :** Phospho (ST), with neutral losses 0.0000(shown in table), 97.9769

**T8 :** Phospho (ST), with neutral losses 0.0000(shown in table), 97.9769

**K15 :** Dimethyl:2H(4)13C(2) (K)

**Ions Score:** 37 **Expect:** 0.009

**Matched b ions:** b(3), b(4), b(6)-98, b(6), b(7)-98, b(7), b(8)-196, b(8)-98, b(9)-98++, b(9)-196, b(10)-196++, b(10)-98, b(10)-196, b(11), b(11)-98, b(11)-196, b(12)-98, b(12)++, b(12)-98++, b(13), b(13)-98++, b(14), b(14)-98, b(14)-196, b(14)++

**Matched y ions:** y(2), y(4), y(5), y(6), y(7), y(8), y(9), y(9)-98, y(10)-98, y(10), y(10)++, y(10)-196, y(11)-196, y(11)-98, y(11), y(11)++, y(11)-98, y(12), y(12)-98, y(12)-196, y(12)++, y(13)-98, y(13)-196, y(14)-98, y(14)-196, y(14), y(14)-98, y(14)++

**Precursor origin neutral loss:** +

## Peptide No.97

**ATTPNQGRPDSVPVYANLQELK**

**Confirmed sites:** @T:2,@S:12

**Ambiguous sites:**

MS/MS Fragmentation of **ATTPNQGRPDSVPVYANLQELK**

Found in **RHG12\_MOUSE**, Rho GTPase-activating protein 12 OS=Mus musculus GN=Arhgap12 PE=1 SV=2

Match to Query 8377: 2611.211223 from(871.411017,3+)

Title: Elution from: 49.618 to 49.618 scan no 4910 cid35.00 polarity:+:MA10:m1s

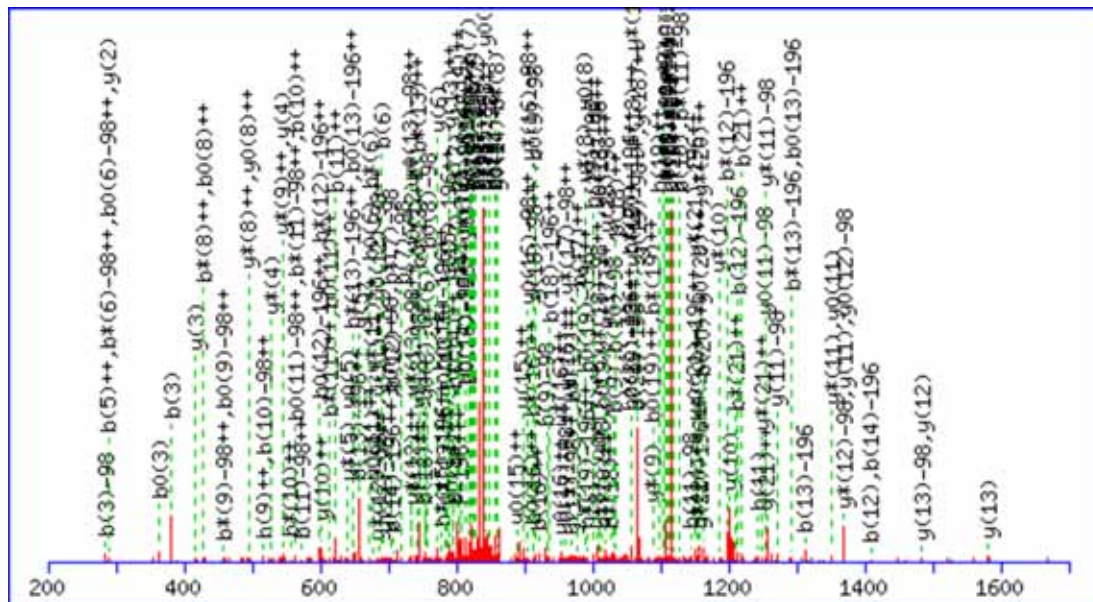

**Monoisotopic mass of neutral peptide Mr(calc):** 2611.2084

**Fixed modifications:** Carbamidomethyl (C) (apply to specified residues or termini only)

**Variable modifications:**

**N-term :** Dimethyl (N-term)

**T2 :** Phospho (ST), with neutral losses 0.0000(shown in table), 97.9769

**S12 :** Phospho (ST), with neutral losses 0.0000(shown in table), 97.9769

**K22 :** Dimethyl (K)

**Ions Score:** 36 **Expect:** 0.021

**Matched b ions:** b(3), b(3)-98, b(5)++, b(6), b(7)-98, b(7), b(9)++, b(9), b(9)-98, b(10)-98, b(10)++-98, b(10)++-98, b(10)++-98, b(11)++-98, b(11)++-98, b(11)++-98, b(11)++-98, b(12)++-98, b(12)++-98, b(12)++-98, b(12)++-98, b(13)++-98, b(13)++-98, b(13)++-98, b(13)++-98, b(13)++-98, b(14)++-98, b(14)++-98, b(14)++-98, b(14)++-98, b(15)++-98, b(15)++-98, b(16)++-98, b(16)++-98, b(17)++-98, b(18)++-98, b(18)++-98, b(18)++-98, b(19)++-98, b(19)++-98, b(19)++-98, b(20)++-98, b(20)++-98, b(20)++-98, b(21)++-98, b(21)++-98

**Matched y ions:** y(2), y(3), y(4), y(5), y(6), y(7), y(8), y(9), y(10), y(10)++, y(11), y(11)-98, y(11)++, y(12), y(12)-98, y(12)++, y(13), y(13)-98, y(13)++-98, y(13)++-98, y(14)++-98, y(15)++-98, y(15)++-98, y(16)++-98, y(16)++-98, y(17)++-98, y(18)++-98, y(18)++-98, y(19)++-98, y(19)++-98, y(20)++-98, y(21)++-98, y(21)++-98

**Precursor origin neutral loss:** +

## Peptide No.98

**ATTPNQGRPDSPPVYANLQELK**

**Confirmed sites:** @T:3,@S:12

**Ambiguous sites:**

MS/MS Fragmentation of **ATTPNQGRPDSPPVYANLQELK**

Found in **RHG12\_MOUSE**, Rho GTPase-activating protein 12 OS=Mus musculus GN=Arhgap12 PE=1 SV=2

Match to Query 7914: 2611.210029 from(871.410619,3+)

Title: Elution from: 49.758 to 49.758 scan no 4889 cid35.00 polarity:+:MA10:m1s



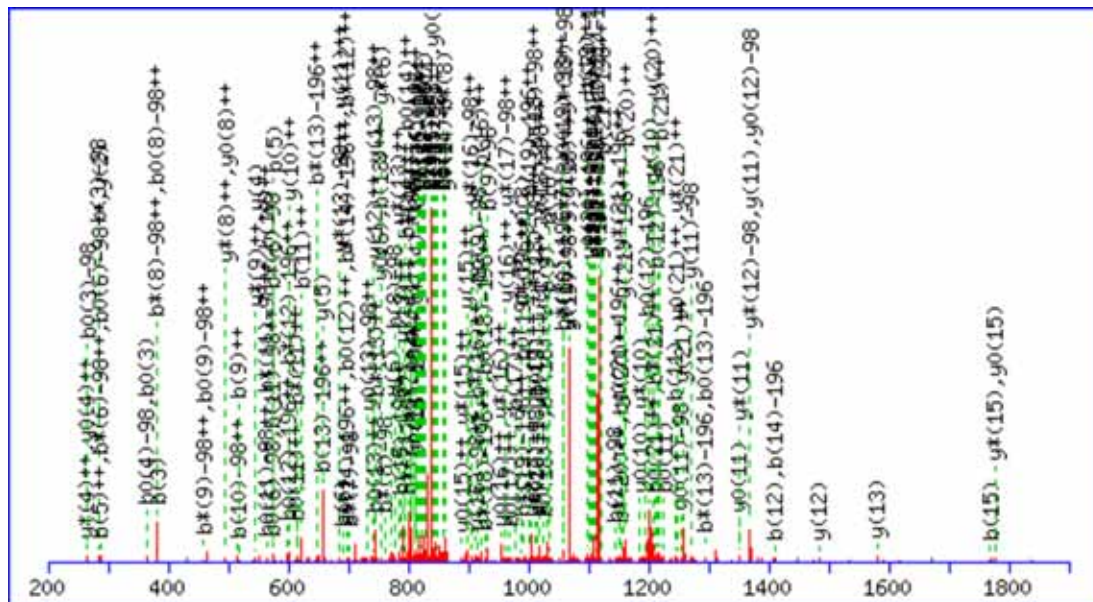

**Monoisotopic mass of neutral peptide Mr(calc):** 2611.2084

**Fixed modifications:** Carbamidomethyl (C) (apply to specified residues or termini only)

**Variable modifications:**

**N-term :** Dimethyl (N-term)

**T3 :** Phospho (ST), with neutral losses 0.0000(shown in table), 97.9769

**S12 :** Phospho (ST), with neutral losses 0.0000(shown in table), 97.9769

**K22 :** Dimethyl (K)

**Ions Score:** 38 **Expect:** 0.014

**Matched b ions:** b(3)-98, b(3), b(5)++, b(5), b(6), b(7), b(8)-98, b(9)++, b(9), b(9)-98, b(10)-98++, b(10)++, b(11)++, b(11)-98++, b(11)-98, b(11), b(12)-98++, b(12)-98, b(12), b(12)-196, b(13)-196++, b(13)-98, b(13)++, b(14)-196, b(14)-98++, b(14)++, b(15)-98, b(15), b(15)-196++, b(15)-98++, b(16)++, b(16)-196++, b(17)-98++, b(17)++, b(18)-98++, b(18)++, b(19)-196++, b(19)++, b(20)++, b(20)-98++, b(21)++, b(21)-196++, b(21)-98++

**Matched y ions:** y(2), y(4), y(5), y(6), y(7), y(8), y(9), y(10), y(10)++, y(11), y(11)-98, y(11)++, y(12), y(12)++, y(13), y(13)++, y(13)-98++, y(14)-98++, y(15)++, y(15)-98++, y(16)-98++, y(16)++, y(17)++, y(18)++, y(18)-98++, y(19)++, y(19)-98++, y(20)-196++, y(20)-98++, y(20)++, y(21)++, y(21)-98++, y(21)-196++

**Precursor origin neutral loss:** +

## Peptide No.99

**AVTCDISEDEED**

**Confirmed sites:** @S:7

**Ambiguous sites:**

**MS/MS Fragmentation of AVTCDISEDEED**

Found in **PCY1A\_MOUSE**, Choline-phosphate cytidyltransferase A OS=Mus musculus GN=Pcyt1a PE=1 SV=1

Match to Query 1535: 1489.518708 from(745.766630,2+)

Title: Elution from: 36.057 to 36.057 scan no 2820 cid35.00 polarity:+:MA10:m1s



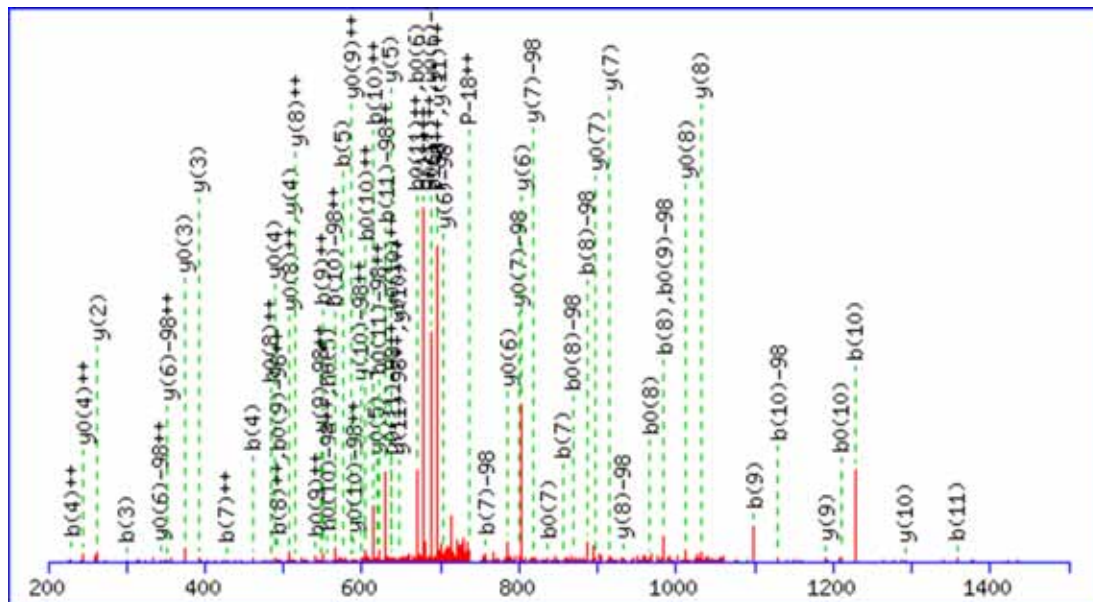

**Monoisotopic mass of neutral peptide Mr(calc):** 1489.5167

**Fixed modifications:** Carbamidomethyl (C) (apply to specified residues or termini only)

**Variable modifications:**

**N-term :** Dimethyl (N-term)

**S7 :** Phospho (ST), with neutral losses 0.0000(shown in table), 97.9769

**Ions Score:** 35 **Expect:** 0.0018

**Matched b ions:** b(3), b(4), b(4)++, b(5), b(6), b(7)++, b(7)-98, b(7), b(8)-98, b(8), b(8)++, b(9), b(9)++, b(10)++, b(10), b(10)-98, b(10)-98+, b(11)++, b(11), b(11)-98++

**Matched y ions:** y(2), y(3), y(4), y(5), y(6), y(6)-98, y(6)-98+, y(7), y(7)-98, y(8), y(8)++, y(8)-98, y(9), y(9)-98, y(9)-98+, y(10), y(10)-98, y(10)-98+, y(10)++, y(11)++, y(11)-98++

**Precursor origin neutral loss:** +

## Peptide No.100

**AVTCDISEDEED**

**Confirmed sites:** @S:7

**Ambiguous sites:**

MS/MS Fragmentation of **AVTCDISEDEED**

Found in **PCY1A\_MOUSE**, Choline-phosphate cytidyltransferase A OS=Mus musculus GN=Pcyt1a PE=1 SV=1

Match to Query 2091: 1495.550056 from(748.782304,2+)

Title: Elution from: 36.411 to 36.411 scan no 3014 cid35.00 polarity:+:MA10

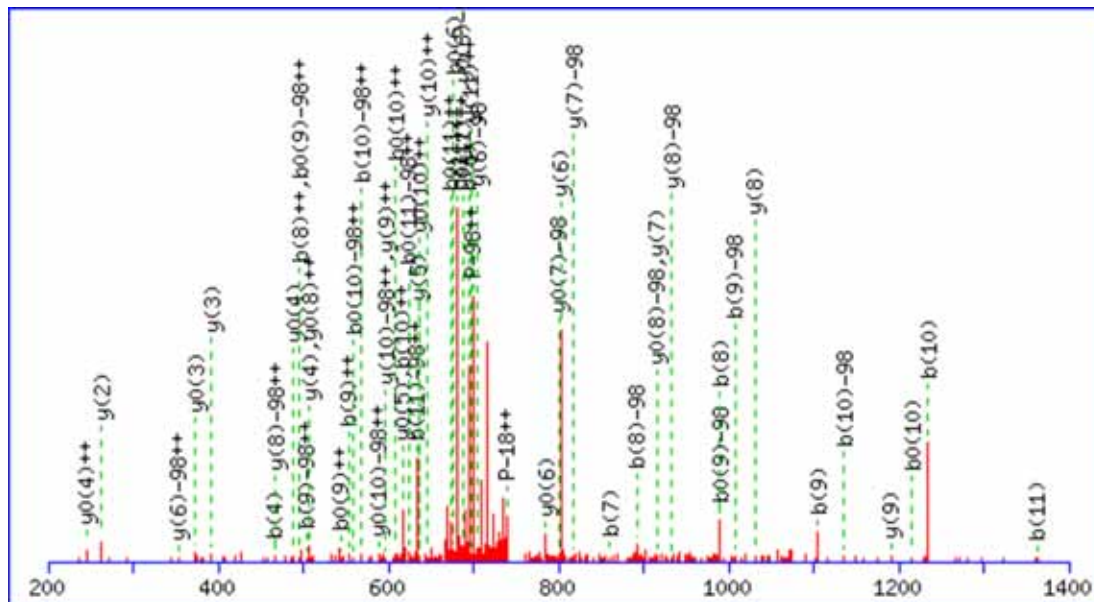

**Monoisotopic mass of neutral peptide Mr(calc):** 1495.5486

**Fixed modifications:** Carbamidomethyl (C) (apply to specified residues or termini only)

**Variable modifications:**

**N-term :** Dimethyl:2H(4)13C(2) (N-term)

**S7 :** Phospho (ST), with neutral losses 0.0000(shown in table), 97.9769

**Ions Score:** 25 **Expect:** 0.027

**Matched b ions:** b(4), b(6), b(7), b(8)-98, b(8), b(8)++, b(9), b(9)-98++, b(9)++, b(9)-98, b(10), b(10)++, b(10)-98++, b(10)-98, b(11)-98++, b(11)++, b(11)

**Matched y ions:** y(2), y(3), y(4), y(5), y(6), y(6)-98++, y(6)-98, y(7)-98, y(7), y(8)-98++, y(8)-98, y(8), y(9), y(9)++, y(10)-98++, y(10)++, y(11)++

**Precursor origin neutral loss:** +

## Peptide No.101

**CLSGEEPVELGLR**

**Confirmed sites:** @S:3

**Ambiguous sites:**

MS/MS Fragmentation of **CLSGEEPVELGLR**

Found in **OBSCN\_MOUSE**, Obscurin OS=Mus musculus GN=Obscn PE=2 SV=2

Match to Query 2848: 1565.717008 from(783.865780,2+)

Title: Elution from: 51.155 to 51.155 scan no 5049 cid35.00 polarity:+:MA10

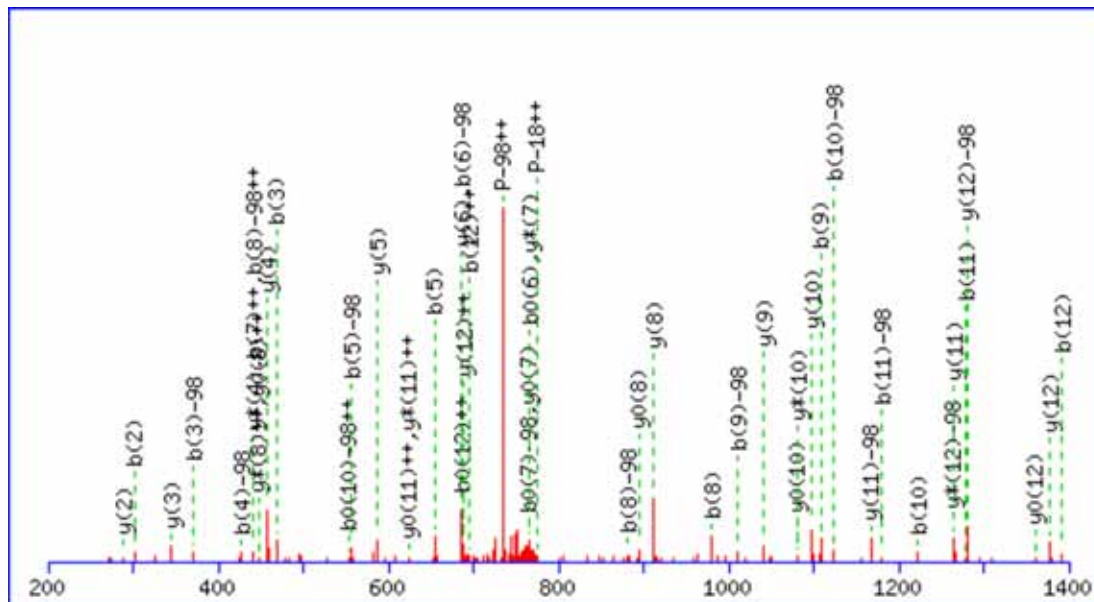

**Monoisotopic mass of neutral peptide Mr(calc):** 1565.7160

**Fixed modifications:** Carbamidomethyl (C) (apply to specified residues or termini only)

**Variable modifications:**

**N-term :** Dimethyl (N-term)

**S3 :** Phospho (ST), with neutral losses 97.9769(shown in table), 0.0000

**Ions Score:** 58 **Expect:** 6.5e-005

**Matched b ions:** b(2), b(3)-98, b(3), b(4)-98, b(5)-98, b(5), b(6)-98, b(7)++, b(8), b(8)-98, b(8)-98, b(9)-98, b(9), b(10), b(10)-98, b(11), b(11)-98, b(12), b(12)++

**Matched y ions:** y(2), y(3), y(4), y(5), y(6), y(8), y(9), y(10), y(11), y(11)-98, y(12)-98, y(12), y(12)++

**Precursor origin neutral loss:** +

## Peptide No.102

**CPSPTMSLPSSWK**

**Confirmed sites:** @S:3,@S:10

**Ambiguous sites:**

**MS/MS Fragmentation of CPSPTMSLPSSWK**

Found in **SYNPO\_MOUSE**, Synaptopodin OS=Mus musculus GN=Synpo PE=1 SV=2

Match to Query 3775: 1708.665438 from(855.339995,2+)

Title: Elution from: 47.216 to 47.216 scan no 4571 cid35.00 polarity:+:MA10

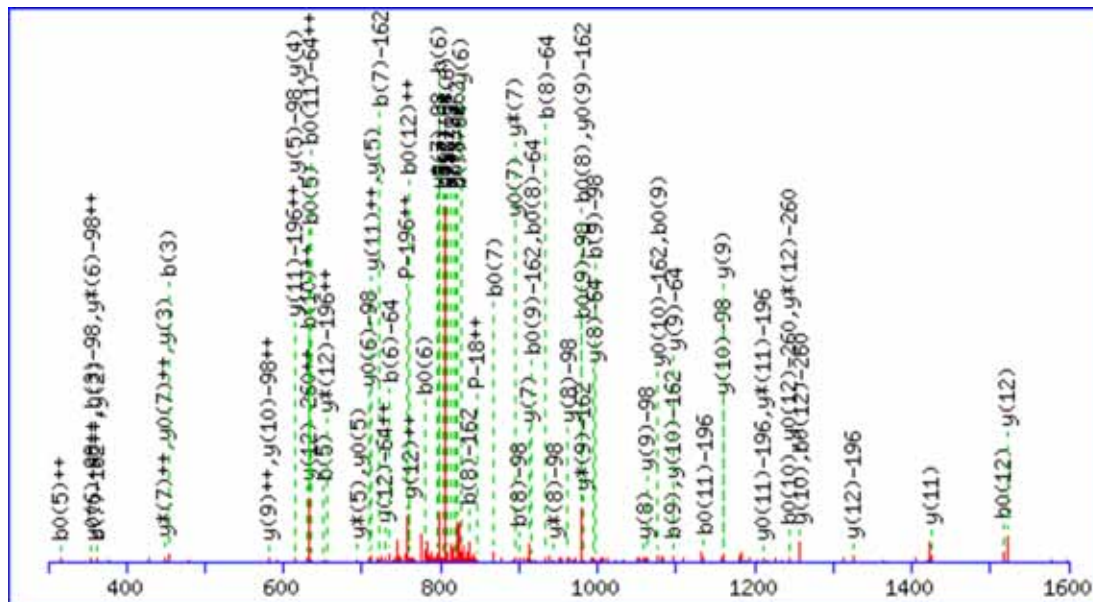

**Monoisotopic mass of neutral peptide Mr(calc): 1708.6643**

**Fixed modifications:** Carbamidomethyl (C) (apply to specified residues or termini only)

**Variable modifications:**

**N-term :** Dimethyl (N-term)

**S3 :** Phospho (ST), with neutral losses 0.0000(shown in table), 97.9769

**M6 :** Oxidation (M), with neutral losses 0.0000(shown in table), 63.9983

**S10 :** Phospho (ST), with neutral losses 0.0000(shown in table), 97.9769

**K13 :** Dimethyl (K)

**Ions Score:** 46 **Expect:** 0.00049

**Matched b ions:** b(3), b(3)-98, b(5), b(6), b(8)-98, b(9), b(9)-98, b(10)++

**Matched y ions:** y(2), y(3), y(4), y(5)-98, y(5), y(6), y(7), y(7)-98, y(8), y(8)-98, y(9)++, y(9), y(9)-98, y(10), y(10)-98++, y(10)-98, y(11)-196++, y(11)++, y(11), y(12)-196, y(12)-98, y(12), y(12)-98++, y(12)++

**Precursor origin neutral loss:** +

## Peptide No.103

**CPSPTMSLPSSWK**

**Confirmed sites:** @S:3,@S:7

**Ambiguous sites:**

**MS/MS Fragmentation of CPSPTMSLPSSWK**

Found in **SYNPO\_MOUSE**, Synaptopodin OS=Mus musculus GN=Synpo PE=1 SV=2

Match to Query 3777: 1708.665672 from(855.340112,2+)

Title: Elution from: 46.862 to 46.862 scan no 4527 cid35.00 polarity+:MA10



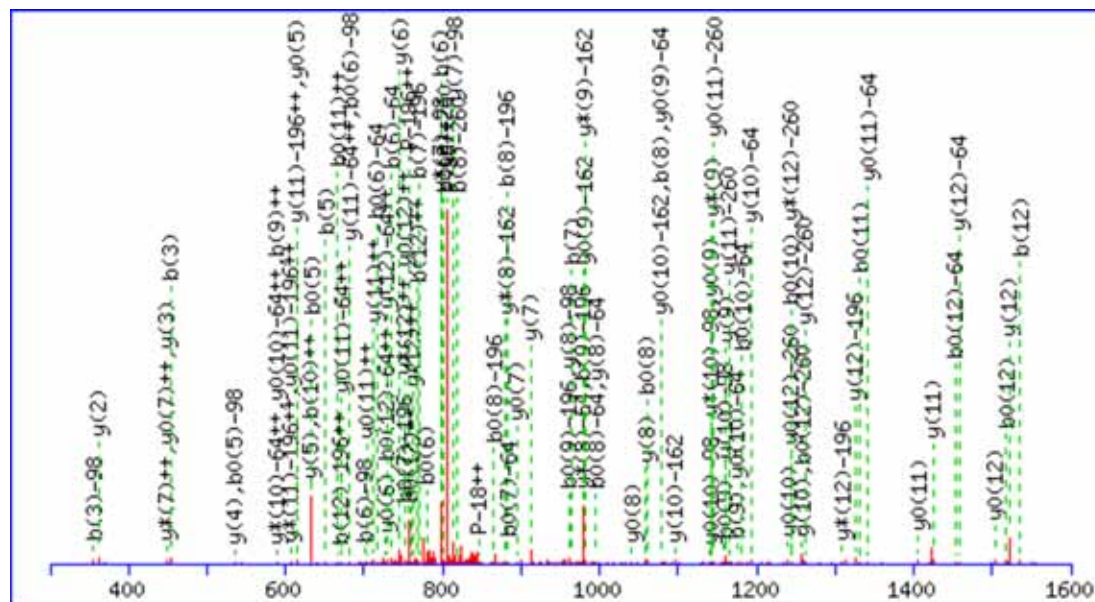

**Monoisotopic mass of neutral peptide Mr(calc):** 1708.6643

**Fixed modifications:** Carbamidomethyl (C) (apply to specified residues or termini only)

**Variable modifications:**

**N-term :** Dimethyl (N-term)

**S3 :** Phospho (ST), with neutral losses 0.0000(shown in table), 97.9769

**M6 :** Oxidation (M), with neutral losses 0.0000(shown in table), 63.9983

**S7 :** Phospho (ST), with neutral losses 0.0000(shown in table), 97.9769

**K13 :** Dimethyl (K)

**Ions Score:** 45 **Expect:** 0.00059

**Matched b ions:** b(3), b(3)-98, b(5), b(6)-98, b(6), b(7)-98, b(7)-196, b(7), b(8)-98, b(8)-196, b(8), b(9)-196, b(9)++, b(9), b(9)-98, b(10)++, b(10)-98, b(12), b(12)-196++, b(12)++

**Matched y ions:** y(2), y(3), y(4), y(5), y(6), y(7), y(7)-98, y(8)-98, y(8), y(9), y(10)-98, y(10), y(11), y(11)-196++, y(11)-98, y(11)++, y(12)-98, y(12), y(12)-196, y(12)-98++, y(12)++

**Precursor origin neutral loss:** +

## Peptide No.104

**CSSSDDDTDVDVEGLR**

**Confirmed sites:** @S:3,@S:4

**Ambiguous sites:**

MS/MS Fragmentation of **CSSSDDDTDVDVEGLR**

Found in **PBIP1\_MOUSE**, Pre-B-cell leukemia transcription factor-interacting protein 1 OS=Mus musculus GN=Pbxip1 PE=1 SV=2

Match to Query 4608: 1956.672380 from(979.343466,2+)

Title: Elution from: 45.931 to 45.931 scan no 4200 cid35.00 polarity:+:MA10

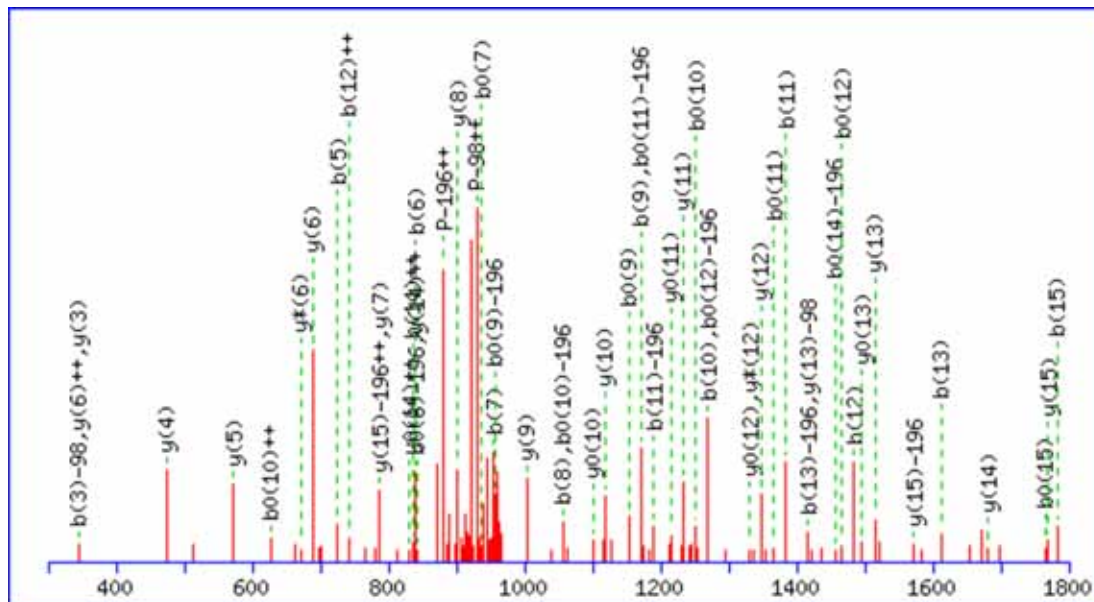

**Monoisotopic mass of neutral peptide Mr(calc):** 1956.6697

**Fixed modifications:** Carbamidomethyl (C) (apply to specified residues or termini only)

**Variable modifications:**

**N-term :** Dimethyl (N-term)

**S3 :** Phospho (ST), with neutral losses 0.0000(shown in table), 97.9769

**S4 :** Phospho (ST), with neutral losses 0.0000(shown in table), 97.9769

**Ions Score:** 91 **Expect:** 5.8e-009

**Matched b ions:** b(3)-98, b(4)-98, b(5)-98, b(5), b(6), b(6)-98, b(7), b(8), b(8)-98, b(9), b(10), b(11), b(11)-196, b(12), b(12)++, b(13), b(13)-98, b(13)-196, b(14)-98++, b(14)-98, b(14)++, b(15)

**Matched y ions:** y(3), y(4), y(5), y(6)++, y(6), y(7), y(8), y(9), y(10), y(11), y(12), y(13), y(13)-98, y(14)-98, y(14), y(14)++, y(15)-98, y(15)-196++, y(15)-196, y(15)

**Precursor origin neutral loss:** +

## Peptide No.105

**CSSSDDDTDVDVEGLRR**

**Confirmed sites:** @S:3,@S:4

**Ambiguous sites:**

MS/MS Fragmentation of **CSSSDDDTDVDVEGLRR**

Found in **PBIP1\_MOUSE**, Pre-B-cell leukemia transcription factor-interacting protein 1 OS=Mus musculus GN=Pbxip1 PE=1 SV=2

Match to Query 6196: 2112.772944 from(705.264924,3+)

Title: Elution from: 39.807 to 39.807 scan no 3640 cid35.00 polarity:+:MA10:m1s

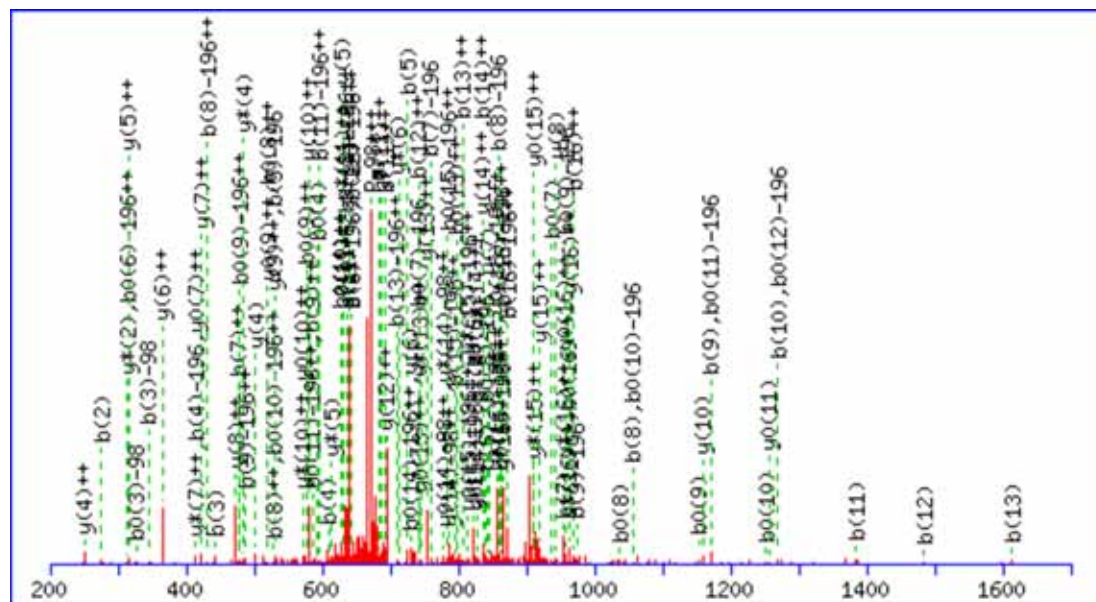

**Monoisotopic mass of neutral peptide Mr(calc): 2112.7708**

**Fixed modifications:** Carbamidomethyl (C) (apply to specified residues or termini only)

**Variable modifications:**

**N-term :** Dimethyl (N-term)

**S3 :** Phospho (ST), with neutral losses 97.9769(shown in table), 0.0000

**S4 :** Phospho (ST), with neutral losses 97.9769(shown in table), 0.0000

**Ions Score:** 73 **Expect:** 6.3e-007

**Matched b ions:** b(2), b(3), b(3)-98, b(4)-196, b(4)-98, b(4), b(5)-196, b(5)-98++, b(5)-98, b(5), b(6), b(6)-196, b(6)-98, b(7), b(7)-98, b(7)++, b(7)-196, b(8)-98++, b(8), b(8)-196++, b(8)++, b(8)-196, b(8)-98, b(9), b(9)-196++, b(9)++, b(9)-196, b(10), b(10)-98, b(10)-98++, b(10)++, b(11), b(11)-196++, b(11)-98++, b(11)++, b(12), b(12)-98, b(12)-196++, b(12)-98++, b(12)++, b(13), b(13)-196++, b(13)++, b(14)++, b(14)-98++, b(15)-196++, b(16)++, b(16)-196++, b(16)-98++

**Matched y ions:** y(4)++, y(4), y(5)++, y(5), y(6)++, y(6), y(7)++, y(7), y(8)++, y(8), y(9)++, y(10), y(10)++, y(11)++, y(12)++, y(13)++, y(14)++, y(14)-98++, y(15)-196++, y(15)-98++, y(15)++, y(16)-196++, y(16)++, y(16)-98++

**Precursor origin neutral loss:** +

## Peptide No.106

**DALLGSNPKNKPSPPSSPSSR**

**Confirmed sites:** @S:12

**Ambiguous sites:**

MS/MS Fragmentation of **DALLGSNPKNKPSPPSSPSSR**

Found in **MYOM1\_MOUSE**, Myomesin-1 OS=Mus musculus GN=Myom1 PE=1 SV=2

Match to Query 6278: 2143.033767 from(715.351865,3+)

Title: Elution from: 35.949 to 35.949 scan no 3118 cid35.00 polarity:+:MA10:m1s

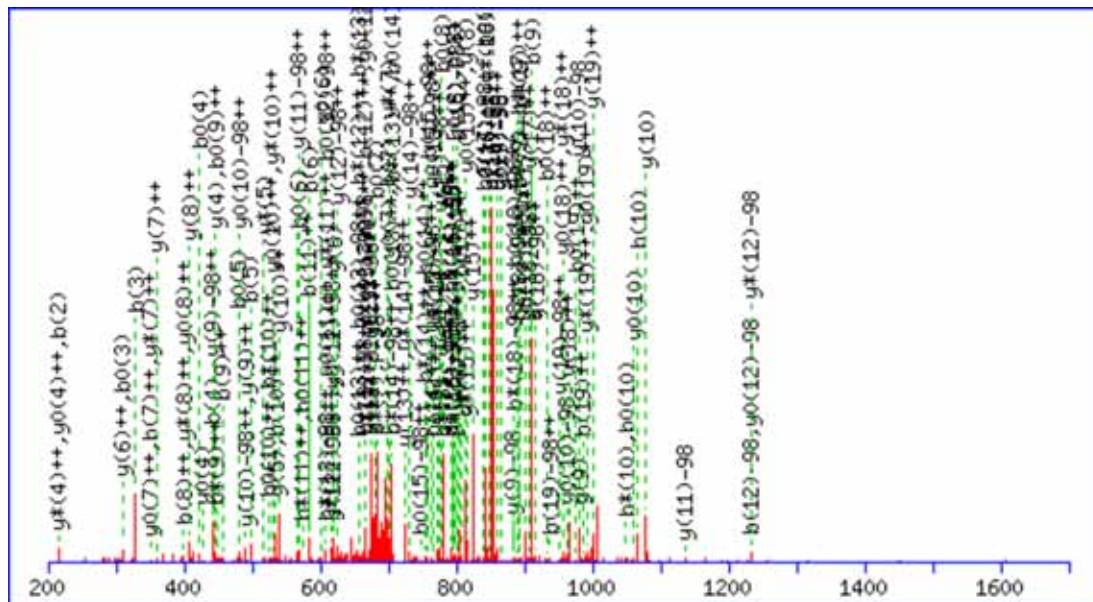

**Monoisotopic mass of neutral peptide Mr(calc):** 2143.0310

**Fixed modifications:** Carbamidomethyl (C) (apply to specified residues or termini only)

**Variable modifications:**

**N-term :** Dimethyl (N-term)

**K10 :** Dimethyl (K)

**S12 :** Phospho (ST), with neutral losses 0.0000(shown in table), 97.9769

**Ions Score:** 64 **Expect:** 2.8e-005

**Matched b ions:** b(2), b(3), b(4), b(5), b(6), b(7), b(7)++, b(8)++, b(8), b(9)++, b(9), b(10)++, b(10), b(11)++, b(12)-98, b(12)-98++, b(12)++, b(13)-98++, b(14)++, b(15)-98++, b(15)++, b(16)-98++, b(17)-98++, b(18)-98++, b(19)-98++, b(19)++

**Matched y ions:** y(4), y(5), y(6)++, y(6), y(7)++, y(8)++, y(8), y(9)++, y(9), y(9)-98++, y(9)-98, y(10)++, y(10), y(10)-98++, y(10)-98, y(11)-98, y(11)-98++, y(11)++, y(12)++, y(12)-98++, y(13)-98++, y(13)++, y(14)++, y(14)-98++, y(15)++, y(15)-98++, y(16)++, y(16)-98++, y(17)++, y(17)-98++, y(18)++, y(18)-98++, y(19)++, y(19)-98++

**Precursor origin neutral loss:** +

## Peptide No.107

**DALLGSPNKPSPSSPSSR**

**Confirmed sites:** @S:12,@S:15

**Ambiguous sites:**

MS/MS Fragmentation of **DALLGSPNKPSPSSPSSR**

Found in **MYOM1\_MOUSE**, Myomesin-1 OS=Mus musculus GN=Myom1 PE=1 SV=2

Match to Query 5832: 2222.998857 from(742.006895,3+)

Title: Elution from: 36.870 to 36.870 scan no 3046 cid35.00 polarity:+:MA10:m1s



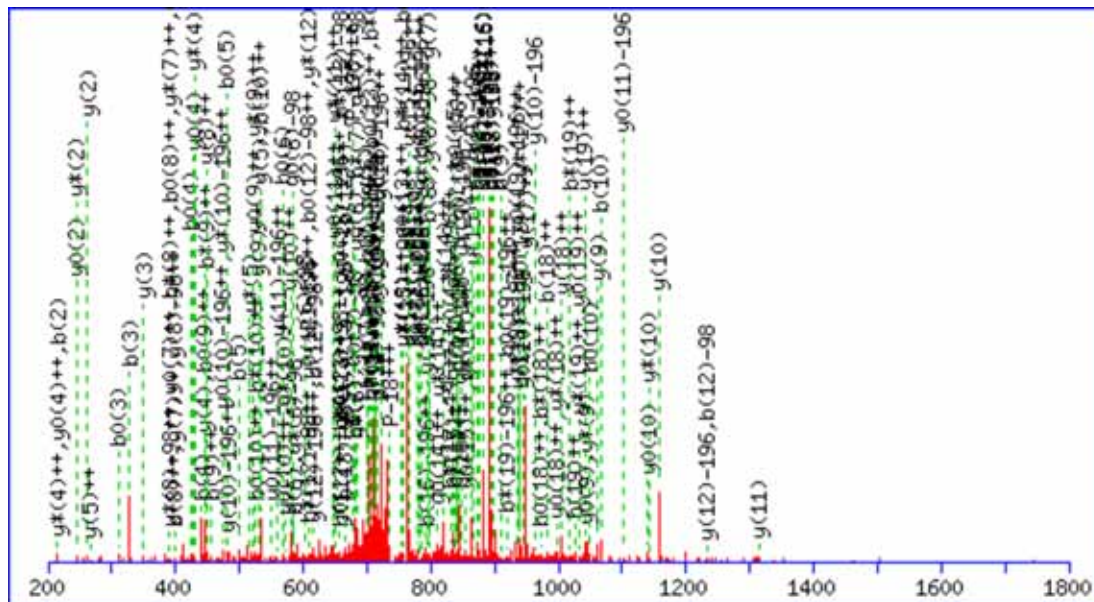

**Monoisotopic mass of neutral peptide Mr(calc):** 2222.9973

**Fixed modifications:** Carbamidomethyl (C) (apply to specified residues or termini only)

**Variable modifications:**

**N-term :** Dimethyl (N-term)

**K10 :** Dimethyl (K)

**S12 :** Phospho (ST), with neutral losses 0.0000(shown in table), 97.9769

**S15 :** Phospho (ST), with neutral losses 0.0000(shown in table), 97.9769

**Ions Score:** 50 **Expect:** 0.00059

**Matched b ions:** b(2), b(3), b(4), b(5), b(6), b(7), b(8)++, b(8), b(9)++, b(9), b(10)++, b(10), b(12)-98, b(12)-98++, b(12)++, b(13)++, b(13)-98++, b(14)++, b(14)-98++, b(15)-98++, b(15)++, b(16)-196++, b(16)-98++, b(16)++, b(17)-196++, b(17)++, b(18)-196++, b(18)-98++, b(18)++, b(19)++, b(19)-98++

**Matched y ions:** y(2), y(3), y(4), y(5), y(5)++, y(6)-98, y(6), y(7)++, y(7)-98, y(7), y(8), y(8)++, y(8)-98++, y(8)-98, y(9)++, y(9)-196, y(9)-98, y(9), y(10), y(10)++, y(10)-98, y(10)-98++, y(10)-196++, y(10)-196, y(11), y(11)-196++, y(11)-98++, y(11)++, y(12)++, y(12)-196, y(12)-196++, y(12)-98++, y(13)++, y(13)-98++, y(13)-196++, y(14)-196++, y(14)++, y(14)-98++, y(15)++, y(15)-196++, y(15)-98++, y(16)++, y(16)-98++, y(16)-196++, y(17)++, y(17)-98++, y(18)++, y(18)-98++, y(19)++, y(19)-98++

**Precursor origin neutral loss:** +

## Peptide No.108

**DALLGSPNPKPSPSSPSSR**

**Confirmed sites:** @S:12,@S:16

**Ambiguous sites:**

MS/MS Fragmentation of **DALLGSPNPKPSPSSPSSR**

Found in **MYOM1\_MOUSE**, Myomesin-1 OS=Mus musculus GN=Myom1 PE=1 SV=2

Match to Query 6696: 2223.001740 from(742.007856,3+)

Title: Elution from: 37.269 to 37.269 scan no 3299 cid35.00 polarity:+:MA10:m1s

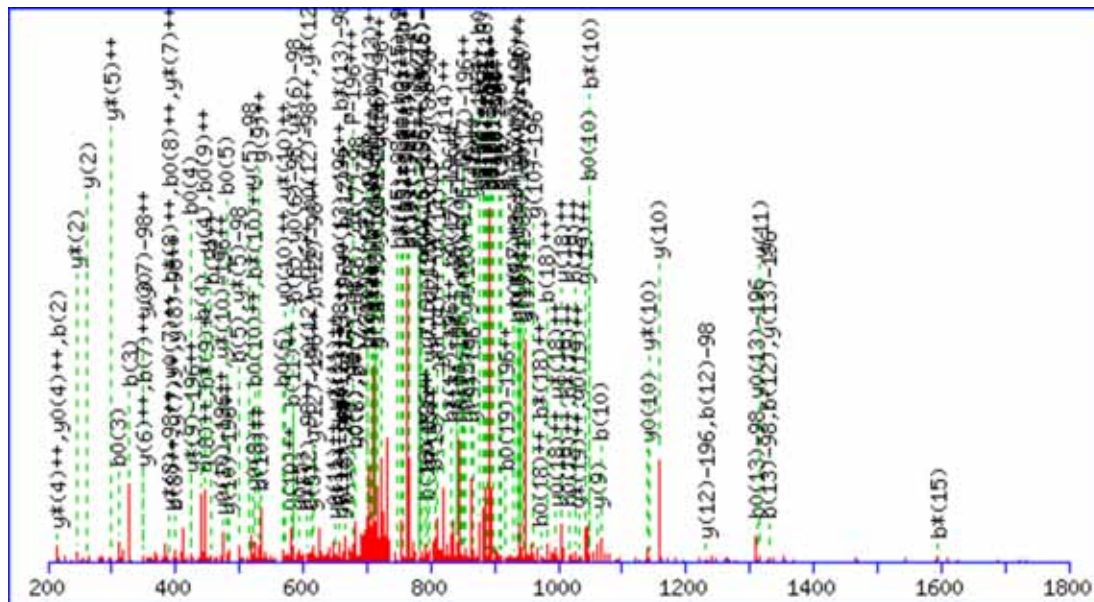

**Monoisotopic mass of neutral peptide Mr(calc):** 2222.9973

**Fixed modifications:** Carbamidomethyl (C) (apply to specified residues or termini only)

**Variable modifications:**

**N-term :** Dimethyl (N-term)

**K10 :** Dimethyl (K)

**S12 :** Phospho (ST), with neutral losses 0.0000(shown in table), 97.9769

**S16 :** Phospho (ST), with neutral losses 0.0000(shown in table), 97.9769

**Ions Score:** 51 **Expect:** 0.00053

**Matched b ions:** b(2), b(3), b(4), b(5), b(6), b(7), b(7)++, b(8)++, b(8), b(9)++, b(9), b(10)++, b(10), b(11)++, b(12), b(12)-98, b(12)-98++, b(12)++, b(13)++, b(13)-98, b(13)-98++, b(14)++, b(14)-98++, b(15)-98++, b(15)++, b(16)-196++, b(16)-98++, b(16)++, b(17)-196++, b(17)-98++, b(17)++, b(18)-196++, b(18)++, b(19)++, b(19)-98++

**Matched y ions:** y(2), y(3), y(4), y(5)-98, y(5), y(6)++, y(6), y(7)++, y(7)-98, y(7)-98++, y(7), y(8)++, y(8)-98++, y(8), y(8)-98, y(9)++, y(9)-98++, y(9)-196, y(9), y(10), y(10)++, y(10)-98, y(10)-98++, y(10)-196++, y(10)-196, y(11), y(11)-98++, y(11)++, y(12)++, y(12)-98, y(12)-196, y(12)-196++, y(12)-98++, y(13)++, y(13)-98++, y(13)-196, y(13)-196++, y(14)-196++, y(14)++, y(14)-98++, y(15)-196++, y(15)++, y(15)-98++, y(16)++, y(16)-98++, y(16)-196++, y(17)++, y(17)-196++, y(17)-98++, y(18)++, y(18)-98++, y(18)-196++, y(19)++, y(19)-196++, y(19)-98++

**Precursor origin neutral loss:** +

## Peptide No.109

**DALLGSPNPKPSPSSPSSR**

**Confirmed sites:** @S:12,@S:18

**Ambiguous sites:**

MS/MS Fragmentation of **DALLGSPNPKPSPSSPSSR**

Found in **MYOM1\_MOUSE**, Myomesin-1 OS=Mus musculus GN=Myom1 PE=1 SV=2

Match to Query 5930: 2222.998890 from(742.006906,3+)

Title: Elution from: 37.577 to 37.577 scan no 3146 cid35.00 polarity:+:MA10:m1s

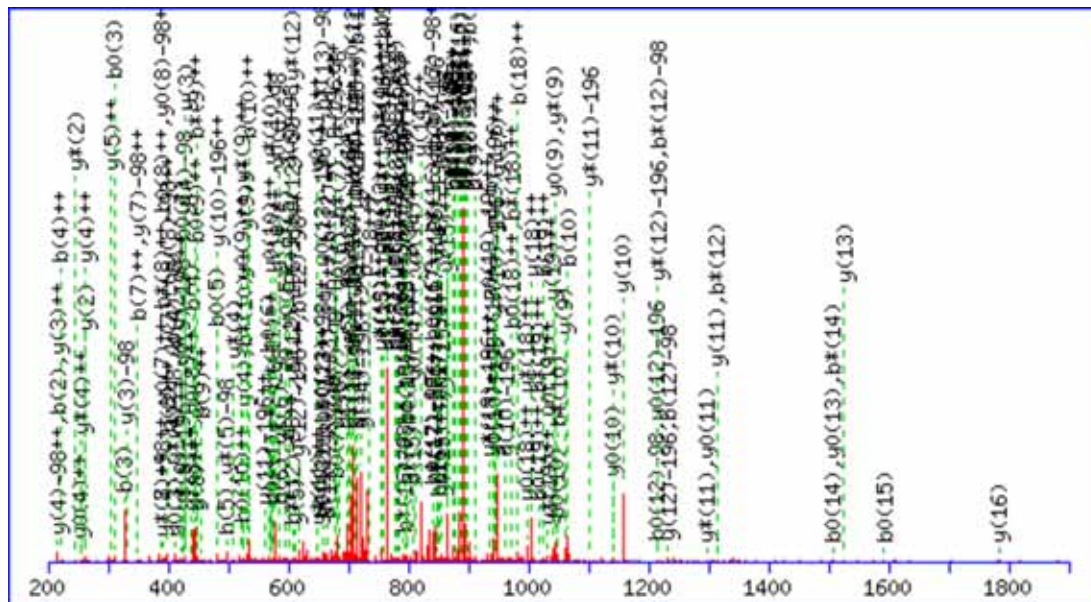

**Monoisotopic mass of neutral peptide Mr(calc): 2222.9973**

**Fixed modifications:** Carbamidomethyl (C) (apply to specified residues or termini only)

**Variable modifications:**

**N-term :** Dimethyl (N-term)

**K10 :** Dimethyl (K)

**S12 :** Phospho (ST), with neutral losses 0.0000(shown in table), 97.9769

**S18 :** Phospho (ST), with neutral losses 0.0000(shown in table), 97.9769

**Ions Score:** 60 **Expect:** 7.1e-005

**Matched b ions:** b(2), b(3), b(4), b(4)++, b(5), b(6), b(7), b(7)++, b(8)++, b(8), b(9)++, b(9), b(10), b(10)++, b(12)-98, b(12)-98++, b(12)++, b(13)++, b(13)-98++, b(14)++, b(14)-98++, b(15)-98++, b(15)++, b(16)++, b(17)-98++, b(17)++, b(18)-196++, b(18)++, b(18)-98++, b(19)-98++, b(19)++

**Matched y ions:** y(2), y(3)++, y(3), y(3)-98, y(4)-98++, y(4)-98, y(4)++, y(4), y(5)++, y(5), y(6)-98, y(6), y(7)++, y(7)-98, y(7)-98++, y(7), y(8)-98++, y(8)++, y(8), y(8)-98, y(9)++, y(9)-196, y(9), y(9)-98++, y(9)-98, y(10)++, y(10), y(10)-98++, y(10)-98, y(10)-196++, y(10)-196, y(11), y(11)-196++, y(11)-98++, y(11)++, y(12)++, y(12)-196, y(12)-196++, y(12)-98++, y(13)++, y(13)-98++, y(13), y(13)-196++, y(14)-196++, y(14)++, y(14)-98++, y(15)++, y(15)-196++, y(15)-98++, y(16)++, y(16)-98++, y(16)-196++, y(17)++, y(17)-98++, y(17)-196++, y(18)++, y(18)-98++, y(19)++, y(19)-196++, y(19)-98++

**Precursor origin neutral loss:** +

## Peptide No.110

**DALLGSPNPKPSPSSPSSR**

**Confirmed sites:** @S:12,@S:19

**Ambiguous sites:**

MS/MS Fragmentation of **DALLGSPNPKPSPSSPSSR**

Found in **MYOM1\_MOUSE**, Myomesin-1 OS=Mus musculus GN=Myom1 PE=1 SV=2

Match to Query 5833: 2222.998926 from(742.006918,3+)

Title: Elution from: 37.294 to 37.294 scan no 3108 cid35.00 polarity:+:MA10:m1s



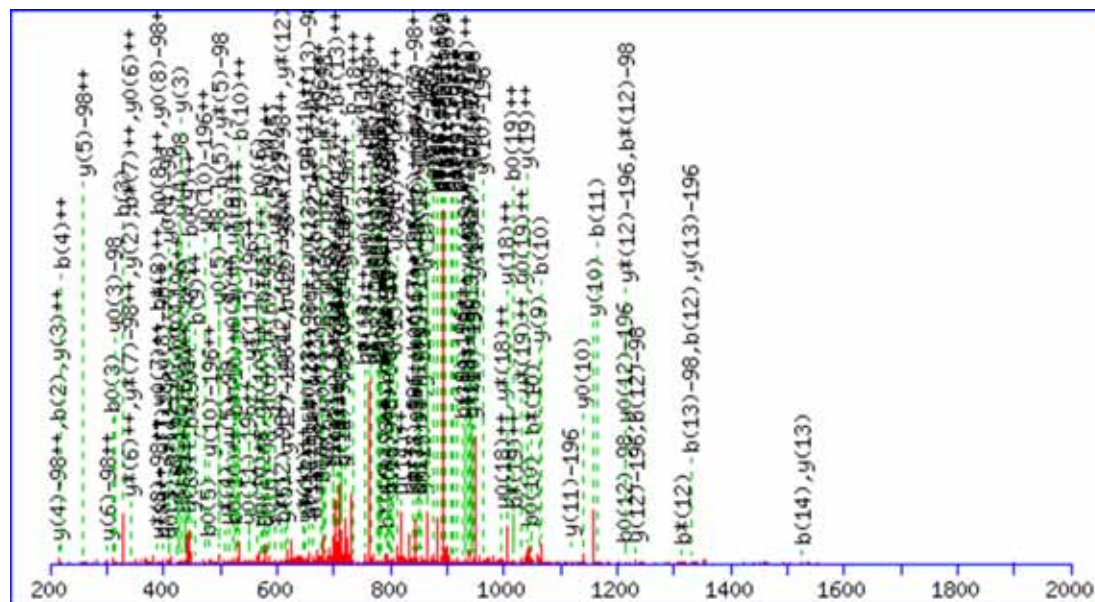

**Monoisotopic mass of neutral peptide Mr(calc):** 2222.9973

**Fixed modifications:** Carbamidomethyl (C) (apply to specified residues or termini only)

**Variable modifications:**

**N-term :** Dimethyl (N-term)

**K10 :** Dimethyl (K)

**S12 :** Phospho (ST), with neutral losses 0.0000(shown in table), 97.9769

**S19 :** Phospho (ST), with neutral losses 0.0000(shown in table), 97.9769

**Ions Score:** 53 **Expect:** 0.00029

**Matched b ions:** b(2), b(3), b(4), b(4)++, b(5), b(6), b(7), b(8)++, b(8), b(9)++, b(9), b(10)++, b(10), b(11), b(12)-98, b(12), b(12)-98++, b(12)++, b(13)++, b(13)-98, b(13)-98++, b(14)++, b(14), b(14)-98++, b(15)++, b(16)-98++, b(17)-98++, b(17)++, b(18)-98++, b(18)++, b(19)-196++

**Matched y ions:** y(2), y(3)++, y(3), y(4)-98++, y(4)-98, y(4), y(5)-98, y(5)-98++, y(5), y(6)-98++, y(6), y(7)-98, y(7)++, y(7), y(8)++, y(8), y(8)-98++, y(8)-98, y(9), y(9)++, y(9)-196, y(9)-98, y(10), y(10)++, y(10)-98, y(10)-98++, y(10)-196++, y(10)-196, y(11)-98++, y(11)++, y(11)-196, y(11)-98, y(12)-196, y(12)++, y(12)-98, y(12)-196++, y(12)-98++, y(13)++, y(13), y(13)-98++, y(13)-196, y(13)-196++, y(14)++, y(14)-196++, y(14)-98++, y(15)++, y(15)-196++, y(15)-98++, y(16)++, y(16)-98++, y(16)-196++, y(17)++, y(17)-98++, y(17)-196++, y(18)++, y(18)-98++, y(18)-196++, y(19)++, y(19)-196++, y(19)-98++

**Precursor origin neutral loss:** +

## Peptide No.111

**DALLGSPNPKPSPSSPSSR**

**Confirmed sites:** @S:12,@S:16

**Ambiguous sites:**

MS/MS Fragmentation of **DALLGSPNPKPSPSSPSSR**

Found in **MYOM1\_MOUSE**, Myomesin-1 OS=Mus musculus GN=Myom1 PE=1 SV=2

Match to Query 7438: 2235.062976 from(746.028268,3+)

Title: Elution from: 37.024 to 37.024 scan no 3216 cid35.00 polarity:+:MA10:m1s



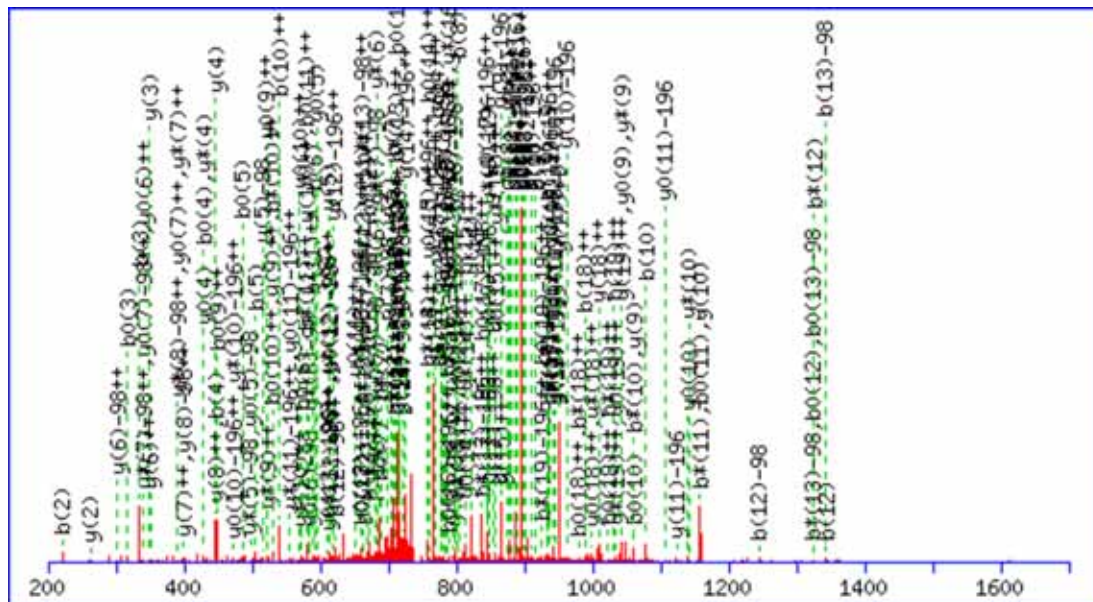

**Monoisotopic mass of neutral peptide Mr(calc):** 2235.0610

**Fixed modifications:** Carbamidomethyl (C) (apply to specified residues or termini only)

**Variable modifications:**

**N-term :** Dimethyl:2H(4)13C(2) (N-term)

**K10 :** Dimethyl:2H(4)13C(2) (K)

**S12 :** Phospho (ST), with neutral losses 0.0000(shown in table), 97.9769

**S16 :** Phospho (ST), with neutral losses 0.0000(shown in table), 97.9769

**Ions Score:** 56 **Expect:** 0.00019

**Matched b ions:** b(2), b(3), b(4), b(5), b(6), b(7), b(8), b(9), b(10)++, b(10), b(11)++, b(12), b(12)-98, b(12)-98++, b(12)++, b(13)-98, b(13)-98++, b(13)++, b(14)-98++, b(14)++, b(15)++, b(16)++, b(16)-98++, b(16)-196++, b(17)-98++, b(17)-196++, b(17)++, b(18)-196++, b(18)-98++, b(18)++, b(19)-196++, b(19)++

**Matched y ions:** y(2), y(3), y(4), y(5)-98, y(5), y(6)-98++, y(6)++, y(6), y(7)++, y(7)-98, y(7), y(8)++, y(8), y(8)-98++, y(8)-98, y(9)++, y(9)-196, y(9)-98, y(9), y(10), y(10)++, y(10)-98++, y(10)-98, y(10)-196, y(11)-196, y(11)-98, y(11)-98++, y(11)++, y(12)++, y(12)-196++, y(12)-98++, y(13)++, y(13)-98++, y(13)-196++, y(14)++, y(14)-196++, y(14)-98++, y(15)++, y(15)-196++, y(15)-98++, y(16)++, y(16)-98++, y(16)-196++, y(17)++, y(17)-98++, y(17)-196++, y(18)++, y(18)-196++, y(18)-98++, y(19)++, y(19)-196++, y(19)-98++

**Precursor origin neutral loss:** +

## Peptide No.112

**DALLGSPNPKPSPSSPSSR**

**Confirmed sites:** @S:12,@S:18

**Ambiguous sites:**

MS/MS Fragmentation of **DALLGSPNPKPSPSSPSSR**

Found in **MYOM1\_MOUSE**, Myomesin-1 OS=Mus musculus GN=Myom1 PE=1 SV=2

Match to Query 6132: 2235.061317 from(746.027715,3+)

Title: Elution from: 37.210 to 37.210 scan no 3127 cid35.00 polarity:+:MA10:m1s

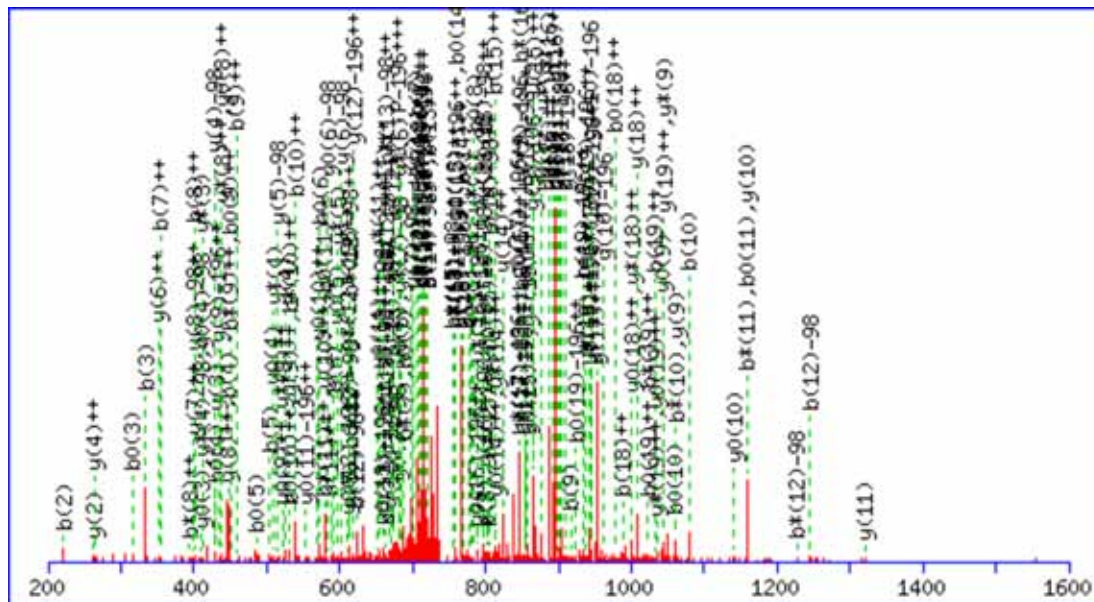

**Monoisotopic mass of neutral peptide Mr(calc):** 2235.0610

**Fixed modifications:** Carbamidomethyl (C) (apply to specified residues or termini only)

**Variable modifications:**

**N-term :** Dimethyl:2H(4)13C(2) (N-term)

**K10 :** Dimethyl:2H(4)13C(2) (K)

**S12 :** Phospho (ST), with neutral losses 0.0000(shown in table), 97.9769

**S18 :** Phospho (ST), with neutral losses 0.0000(shown in table), 97.9769

**Ions Score:** 72 **Expect:** 5.4e-006

**Matched b ions:** b(2), b(3), b(4), b(5), b(6), b(7), b(7)++, b(8)++, b(8), b(9)++, b(9), b(10), b(10)++, b(11)++, b(12)-98, b(12)-98++, b(12)++, b(13)++, b(13)-98++, b(14)-98++, b(14)++, b(15)++, b(16)-98++, b(16)++, b(17)-98++, b(17)++, b(18)-98++, b(18)++, b(19)-196++, b(19)-98++, b(19)++

**Matched y ions:** y(2), y(3), y(4)++, y(4)-98, y(4), y(5), y(5)-98, y(6)++, y(6)-98, y(6), y(7)++, y(7)-98, y(7), y(8)++, y(8), y(8)-98++, y(8)-98, y(9)-98++, y(9)++, y(9), y(9)-196++, y(9)-196, y(9)-98, y(10)++, y(10), y(10)-98, y(10)-98++, y(10)-196, y(11), y(11)-98++, y(11)++, y(12)++, y(12)-196++, y(12)-98++, y(13)++, y(13)-98++, y(13)-196++, y(14)++, y(14)-98++, y(15)++, y(15)-196++, y(15)-98++, y(16)++, y(16)-98++, y(16)-196++, y(17)++, y(17)-98++, y(17)-196++, y(18)++, y(18)-98++, y(18)-196++, y(19)++, y(19)-196++, y(19)-98++

**Precursor origin neutral loss:** +

## Peptide No.113

**DALLGSPNPKPSPSSPSSR**

**Confirmed sites:** @S:15,@S:16

**Ambiguous sites:**

MS/MS Fragmentation of **DALLGSPNPKPSPSSPSSR**

Found in **MYOM1\_MOUSE**, Myomesin-1 OS=Mus musculus GN=Myom1 PE=1 SV=2

Match to Query 7437: 2235.062595 from(746.028141,3+)

Title: Elution from: 37.467 to 37.467 scan no 3282 cid35.00 polarity:+:MA10:m1s

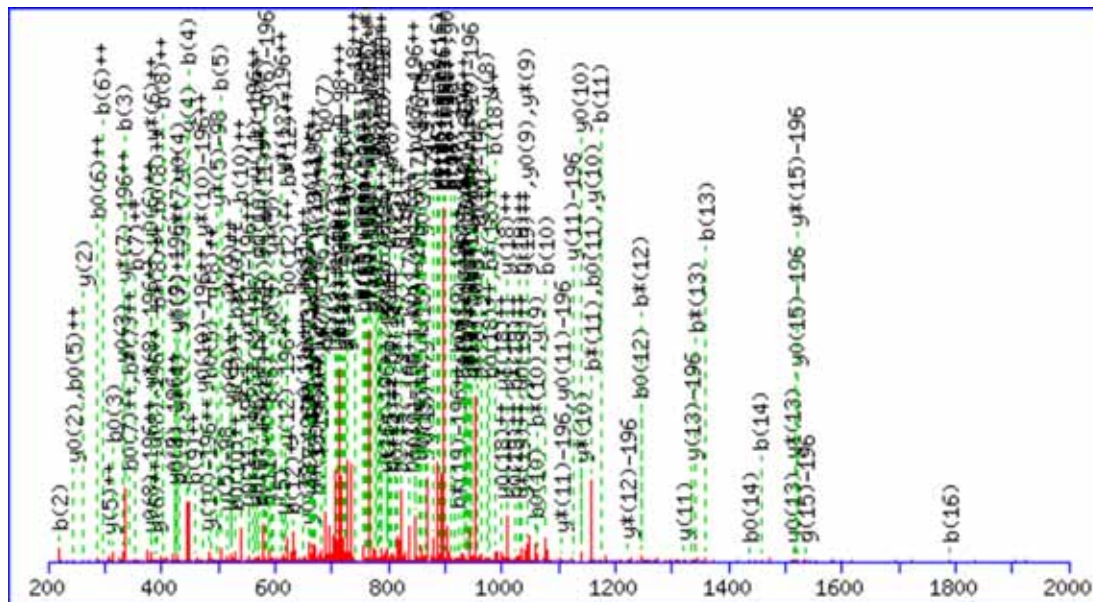

**Monoisotopic mass of neutral peptide Mr(calc):** 2235.0610

**Fixed modifications:** Carbamidomethyl (C) (apply to specified residues or termini only)

**Variable modifications:**

**N-term :** Dimethyl:2H(4)13C(2) (N-term)

**K10 :** Dimethyl:2H(4)13C(2) (K)

**S15 :** Phospho (ST), with neutral losses 0.0000(shown in table), 97.9769

**S16 :** Phospho (ST), with neutral losses 0.0000(shown in table), 97.9769

**Ions Score:** 54 **Expect:** 0.00034

**Matched b ions:** b(2), b(3), b(4), b(5), b(6), b(6)++, b(7), b(7)++, b(8)++, b(8), b(9)++, b(9), b(10)++, b(10), b(11), b(11)++, b(12)++, b(13), b(13)++, b(14), b(14)++, b(15)-98++, b(15)++, b(16)++, b(16)-98, b(16), b(16)-98++, b(16)-196++, b(17)-98++, b(17)++, b(17)-196++, b(18)++, b(18)-196++, b(18)-98++, b(19)-196++, b(19)-98++, b(19)++

**Matched y ions:** y(2), y(4), y(5), y(5)++, y(5)-98, y(6)++, y(6)-196, y(6)-98, y(6), y(7)-98++, y(7)-196, y(7)-98, y(7), y(8)-196++, y(8)++, y(8)-196, y(8)-98, y(8), y(9)-98++, y(9)++, y(9), y(9)-196, y(9)-98, y(10)++, y(10), y(10)-98, y(10)-196++, y(10)-98++, y(10)-196, y(11), y(11)-196++, y(11)-98++, y(11)++, y(11)-196, y(11)-98, y(12)++, y(12)-98, y(12)-196++, y(12)-98++, y(13)++, y(13)-98++, y(13)-196, y(13)-196++, y(14)++, y(14)-196++, y(14)-98++, y(15)-196, y(15)++, y(15)-98++, y(15)-196++, y(16)++, y(16)-98++, y(16)-196++, y(17)++, y(17)-98++, y(17)-196++, y(18)++, y(18)-196++, y(18)-98++, y(19)++, y(19)-196++, y(19)-98++

**Precursor origin neutral loss:** +

## Peptide No.114

**DAPTTLAESPSPK**

**Confirmed sites:** @S:11

**Ambiguous sites:**

**MS/MS Fragmentation of DAPTTLAESPSPK**

Found in **NACAM\_MOUSE**, Nascent polypeptide-associated complex subunit alpha, muscle-specific form OS=Mus musculus GN=Naca PE=1 SV=1



Match to Query 2050: 1535.713712 from(768.864132,2+)

Title: Elution from: 33.252 to 33.252 scan no 2537 cid35.00 polarity:+:MA10

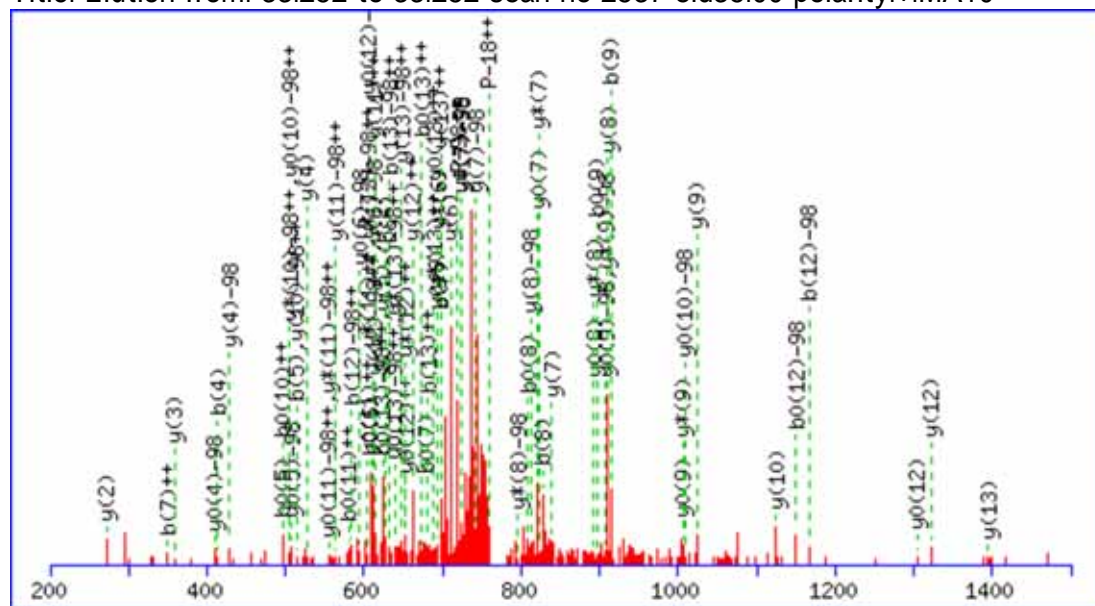

Monoisotopic mass of neutral peptide Mr(calc): 1535.7120

Fixed modifications: Carbamidomethyl (C) (apply to specified residues or termini only)

Variable modifications:

N-term : Dimethyl (N-term)

S11 : Phospho (ST), with neutral losses 0.0000(shown in table), 97.9769

K14 : Dimethyl (K)

Ions Score: 41 Expect: 0.0027

Matched b ions: b(4), b(5), b(6), b(7)++, b(7), b(8), b(9), b(12)-98, b(12)-98++, b(13)-98++, b(13)++

Matched y ions: y(2), y(3), y(4)-98, y(4), y(5), y(6), y(6)-98, y(7), y(7)-98, y(8), y(8)-98, y(9), y(10), y(10)-98++, y(11)++, y(11)-98++, y(12), y(12)++, y(12)-98++, y(13), y(13)-98++, y(13)++

Precursor origin neutral loss: +

## Peptide No.115

DAPTTLAESPSPK

Confirmed sites: @S:12

Ambiguous sites:

MS/MS Fragmentation of **DAPTTLAESPSPK**

Found in **NACAM\_MOUSE**, Nascent polypeptide-associated complex subunit alpha, muscle-specific form OS=Mus musculus GN=Naca PE=1 SV=1

Match to Query 2746: 1535.712600 from(768.863576,2+)

Title: Elution from: 33.215 to 33.215 scan no 2743 cid35.00 polarity:+:MA10



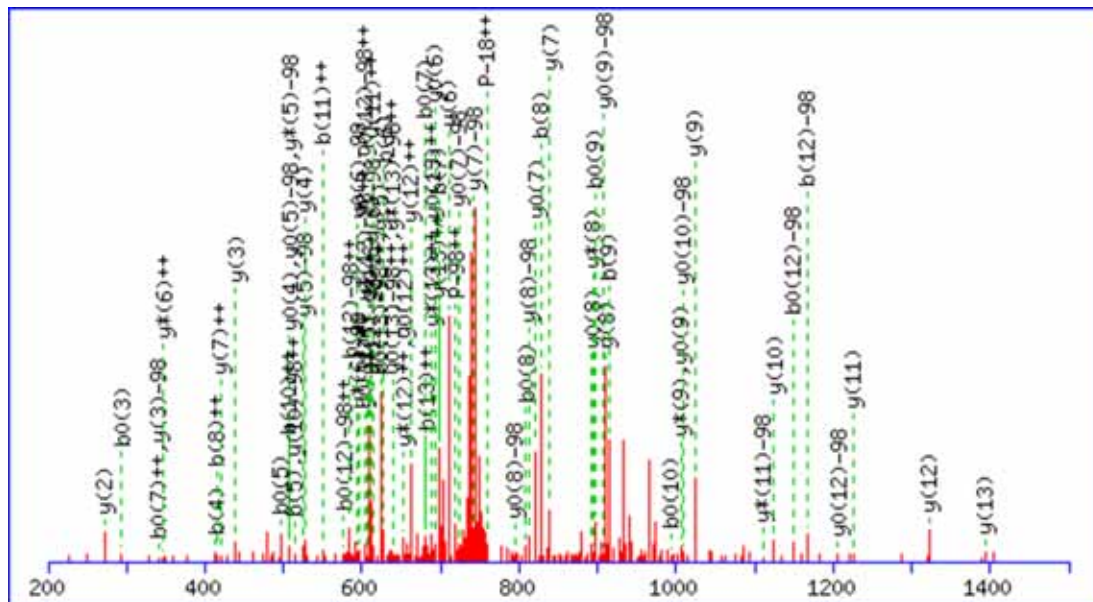

**Monoisotopic mass of neutral peptide Mr(calc):** 1535.7120

**Fixed modifications:** Carbamidomethyl (C) (apply to specified residues or termini only)

**Variable modifications:**

**N-term :** Dimethyl (N-term)

**S12 :** Phospho (ST), with neutral losses 0.0000(shown in table), 97.9769

**K14 :** Dimethyl (K)

**Ions Score:** 66 **Expect:** 8.6e-006

**Matched b ions:** b(4), b(5), b(6), b(7), b(8), b(8)++, b(9), b(10)++, b(11)++, b(12)-98, b(12)-98++, b(13)++

**Matched y ions:** y(2), y(3), y(3)-98, y(4), y(5), y(5)-98, y(6), y(6)-98, y(7)++, y(7), y(7)-98, y(8), y(8)-98, y(9), y(10), y(10)-98++, y(11), y(11)++, y(12), y(12)-98++, y(12)++, y(13), y(13)++

**Precursor origin neutral loss:**

## Peptide No.116

**DAPTTLAESPSPK**

**Confirmed sites:** @S:9

**Ambiguous sites:**

MS/MS Fragmentation of **DAPTTLAESPSPK**

Found in **NACAM\_MOUSE**, Nascent polypeptide-associated complex subunit alpha, muscle-specific form OS=Mus musculus GN=Naca PE=1 SV=1

Match to Query 2747: 1535.712908 from(768.863730,2+)

Title: Elution from: 32.246 to 32.246 scan no 2613 cid35.00 polarity:+MA10:m1s

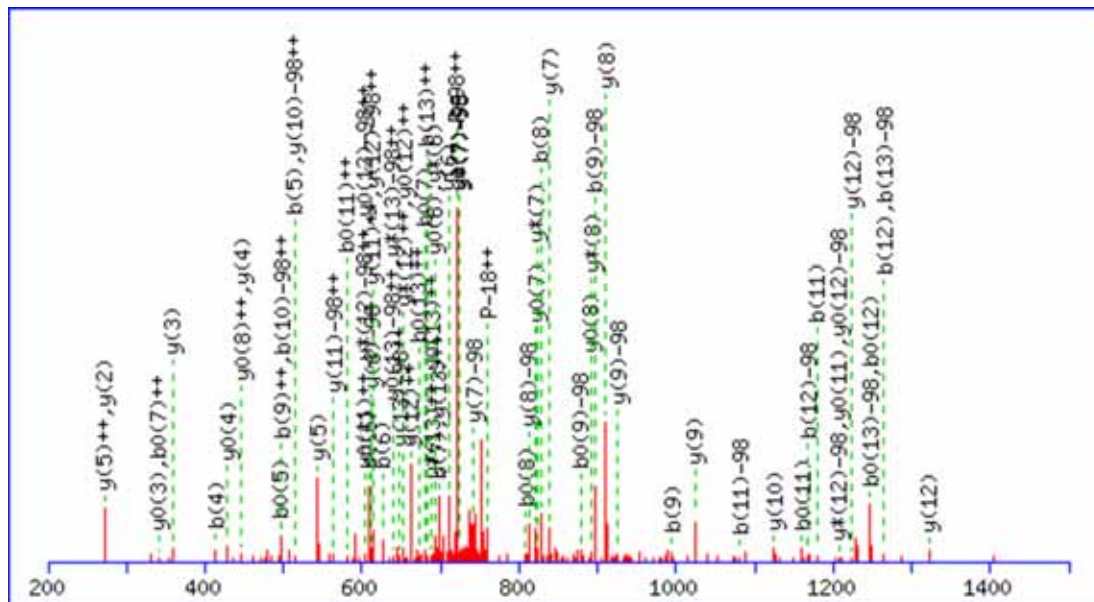

**Monoisotopic mass of neutral peptide Mr(calc):** 1535.7120

**Fixed modifications:** Carbamidomethyl (C) (apply to specified residues or termini only)

**Variable modifications:**

**N-term :** Dimethyl (N-term)

**S9 :** Phospho (ST), with neutral losses 0.0000(shown in table), 97.9769

**K14 :** Dimethyl (K)

**Ions Score:** 57 **Expect:** 6.6e-005

**Matched b ions:** b(4), b(5), b(6), b(7), b(8), b(9)-98, b(9), b(9)++, b(10)-98++, b(11), b(11)-98, b(12), b(12)-98, b(13)-98, b(13)++

**Matched y ions:** y(2), y(3), y(4), y(5)++, y(5), y(6), y(6)-98, y(7), y(7)-98, y(8), y(8)-98, y(9), y(9)-98, y(10), y(10)-98++, y(11)++, y(11)-98++, y(12)++, y(12), y(12)-98++, y(12)-98, y(13)++, y(13)-98++

**Precursor origin neutral loss:** +

## Peptide No.117

**DDDDIDLFGSDDEEESEEAK**

**Confirmed sites:** @S:10

**Ambiguous sites:**

MS/MS Fragmentation of **DDDDIDLFGSDDEEESEEAK**

Found in **EF1B\_MOUSE**, Elongation factor 1-beta OS=Mus musculus GN=Eef1b PE=1 SV=5

Match to Query 7305: 2407.895940 from(1204.955246,2+)

Title: Elution from: 58.060 to 58.060 scan no 5756 cid35.00 polarity:+:MA10:m1s

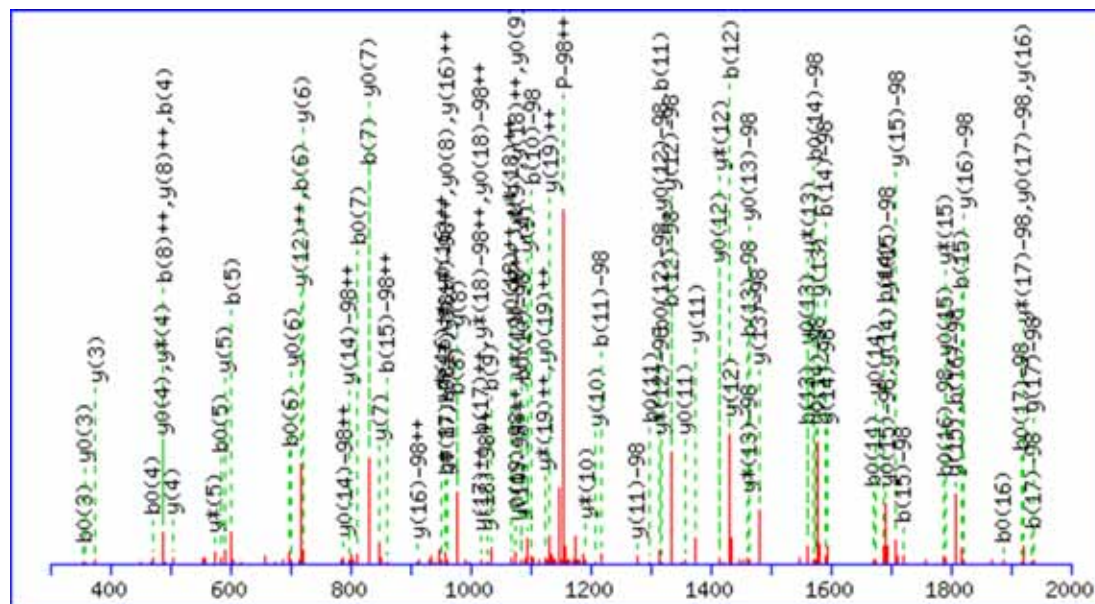

**Monoisotopic mass of neutral peptide Mr(calc):** 2407.8952

**Fixed modifications:** Carbamidomethyl (C) (apply to specified residues or termini only)

**Variable modifications:**

**N-term :** Dimethyl (N-term)

**S10 :** Phospho (ST), with neutral losses 97.9769(shown in table), 0.0000

**K20 :** Dimethyl (K)

**Ions Score:** 82 **Expect:** 1.6e-007

**Matched b ions:** b(4), b(5), b(6), b(7), b(8)++, b(8), b(9), b(10)-98, b(11)-98, b(11), b(12)-98, b(12), b(13)-98, b(13), b(14), b(14)-98, b(15), b(15)-98, b(15)-98++, b(16)-98, b(17)++, b(17)-98

**Matched y ions:** y(3), y(4), y(5), y(6), y(7), y(8)++, y(8), y(9), y(10), y(11), y(11)-98, y(12)++, y(12)-98, y(12), y(13)-98, y(13), y(14), y(14)-98, y(14)-98++, y(15), y(15)-98, y(16), y(16)++, y(16)-98, y(16)-98++, y(17)-98, y(17)++, y(18)++, y(18)-98++, y(19)++, y(19)-98++

**Precursor origin neutral loss:** +

## Peptide No.118

**DDDDIDLFGSDDEEESEEAKK**

**Confirmed sites:** @S:10

**Ambiguous sites:**

MS/MS Fragmentation of **DDDDIDLFGSDDEEESEEAKK**

Found in **EF1B\_MOUSE**, Elongation factor 1-beta OS=Mus musculus GN=Eef1b PE=1 SV=5

Match to Query 7779: 2564.022744 from(855.681524,3+)

Title: Elution from: 51.719 to 51.719 scan no 5110 cid35.00 polarity:+:MA10:m1s

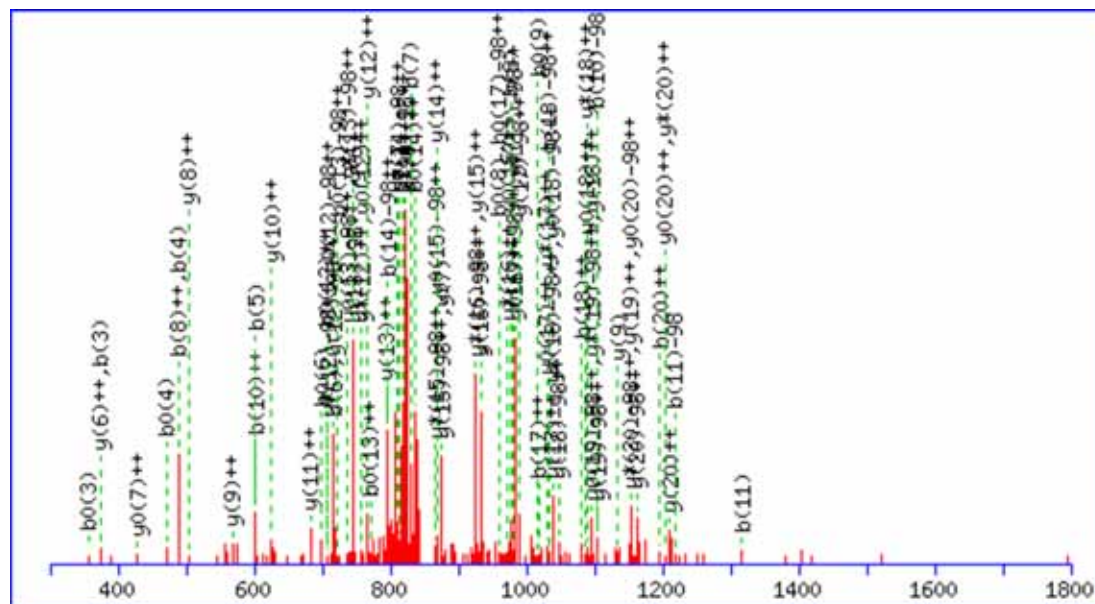

**Monoisotopic mass of neutral peptide Mr(calc):** 2564.0214

**Fixed modifications:** Carbamidomethyl (C) (apply to specified residues or termini only)

**Variable modifications:**

**N-term :** Dimethyl (N-term)

**S10 :** Phospho (ST), with neutral losses 0.0000(shown in table), 97.9769

**K20 :** Dimethyl (K)

**K21 :** Dimethyl (K)

**Ions Score:** 58 **Expect:** 7.5e-005

**Matched b ions:** b(3), b(4), b(5), b(6), b(7), b(8)++, b(8), b(10)++, b(10)-98, b(11), b(11)-98, b(14)-98++, b(17)++, b(18)++, b(18)-98++, b(20)++

**Matched y ions:** y(6)++, y(6), y(7), y(8)++, y(9)++, y(9), y(10)++, y(11)++, y(12)-98++, y(12)++, y(13)-98++, y(13)++, y(14)-98++, y(14)++, y(15)++, y(15)-98++, y(16)++, y(16)-98++, y(17)++, y(17)-98++, y(18)++, y(18)-98++, y(19)++, y(19)-98++, y(20)-98++, y(20)++

**Precursor origin neutral loss:** +

## Peptide No.119

**DDGDEEGLLTHSEEELEHSQDTDAEDGALQ**

**Confirmed sites:** @T:10,@T:22

**Ambiguous sites:**

MS/MS Fragmentation of **DDGDEEGLLTHSEEELEHSQDTDAEDGALQ**

Found in **RALY\_MOUSE**, RNA-binding protein Raly OS=Mus musculus GN=Raly PE=1 SV=2

Match to Query 8791: 3471.304299 from(1158.108709,3+)

Title: Elution from: 53.604 to 53.604 scan no 5310 cid35.00 polarity:+:MA10:m1s



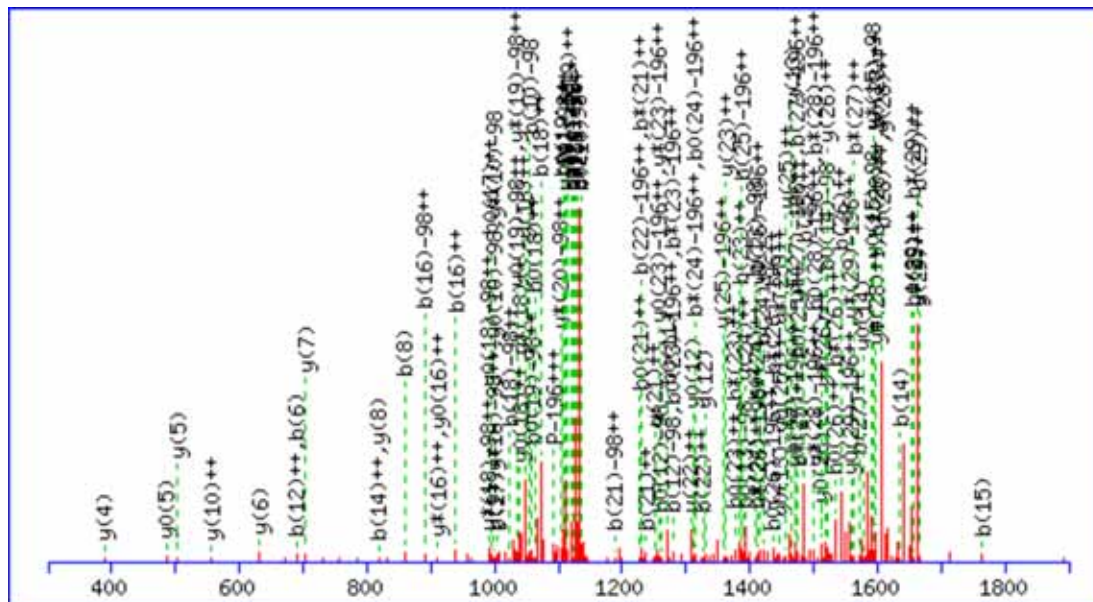

**Monoisotopic mass of neutral peptide Mr(calc):** 3471.3036

**Fixed modifications:** Carbamidomethyl (C) (apply to specified residues or termini only)

**Variable modifications:**

**N-term :** Dimethyl (N-term)

**T10 :** Phospho (ST), with neutral losses 0.0000(shown in table), 97.9769

**T22 :** Phospho (ST), with neutral losses 0.0000(shown in table), 97.9769

**Ions Score:** 46 **Expect:** 0.00085

**Matched b ions:** b(6), b(8), b(10)-98, b(12)++, b(12)-98, b(13)-98, b(14)++, b(14), b(15), b(16)++, b(16)-98++, b(17)++, b(18)++, b(18)-98++, b(19)++, b(20)-98++, b(21)++, b(21)-98++, b(22)-196++, b(22)-98++, b(22)++, b(23)++, b(23)-98++, b(24)++, b(24)-98++, b(25)++, b(25)-98++, b(25)-196++, b(26)++, b(26)-98++, b(27)-196++, b(27)-98++, b(27)++, b(28)++, b(28)-98++, b(29)++, b(29)-98++

**Matched y ions:** y(4), y(5), y(6), y(7), y(8), y(9), y(10)++, y(10), y(12), y(13), y(18)++, y(18)-98++, y(20)-98++, y(21)++, y(22)++, y(22)-98++, y(23)++, y(24)++, y(24)-98++, y(25)-196++, y(25)-98++, y(25)++, y(26)-98++, y(26)++, y(28)++, y(28)-98++, y(29)++

**Precursor origin neutral loss:** +

## Peptide No.120

**DFDISEQNDSSDEEK**

**Confirmed sites:** @S:10,@S:11

**Ambiguous sites:**

MS/MS Fragmentation of **DFDISEQNDSSDEEK**

Found in **DNJJC1\_MOUSE**, DnaJ homolog subfamily C member 1 OS=Mus musculus GN=Dnajc1 PE=1 SV=1

Match to Query 5124: 1984.750530 from(993.382541,2+)

Title: Elution from: 46.584 to 46.584 scan no 4340 cid35.00 polarity:+:MA10:m1s



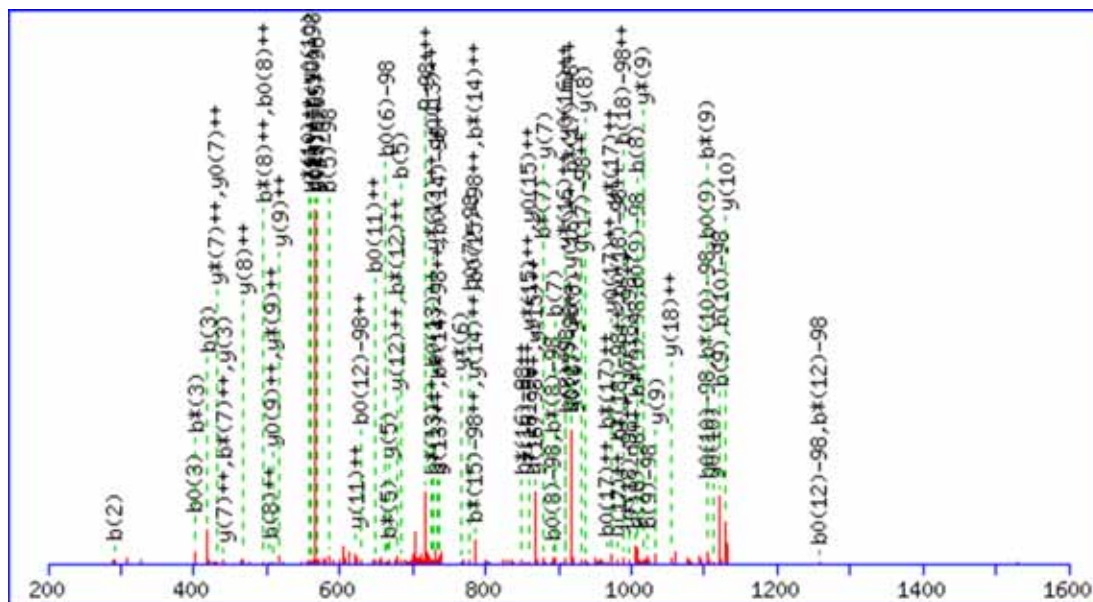

**Monoisotopic mass of neutral peptide Mr(calc):** 2250.0471

**Fixed modifications:** Carbamidomethyl (C) (apply to specified residues or termini only)

**Variable modifications:**

**N-term :** Dimethyl (N-term)

**S5 :** Phospho (ST), with neutral losses 97.9769(shown in table), 0.0000

**Ions Score:** 46 **Expect:** 0.0017

**Matched b ions:** b(2), b(3), b(5)-98, b(5), b(7), b(8), b(8)++, b(8)-98, b(9), b(9)-98, b(9)++, b(10)-98, b(10)-98++, b(13)++, b(18)-98++

**Matched y ions:** y(3), y(4), y(5), y(7), y(7)++, y(8)++, y(8), y(9)++, y(9), y(10)++, y(10), y(11)++, y(12)++, y(13)++, y(14)++, y(15)++, y(16)-98++, y(16)++, y(17)-98++, y(17)++, y(18)-98++, y(18)++

**Precursor origin neutral loss:** +

## Peptide No.122

**DGTAPPPQSPSSPGSGQDEDWSDEESPRK**

**Confirmed sites:** @S:15

**Ambiguous sites:**

MS/MS Fragmentation of **DGTAPPPQSPSSPGSGQDEDWSDEESPRK**

Found in **PACN3\_MOUSE**, Protein kinase C and casein kinase II substrate protein 3 OS=Mus musculus GN=Pacsin3 PE=1 SV=1

Match to Query 8665: 3175.330400 from(794.839876,4+)

Title: Elution from: 35.717 to 35.717 scan no 3087 cid35.00 polarity:+:MA10:m1s

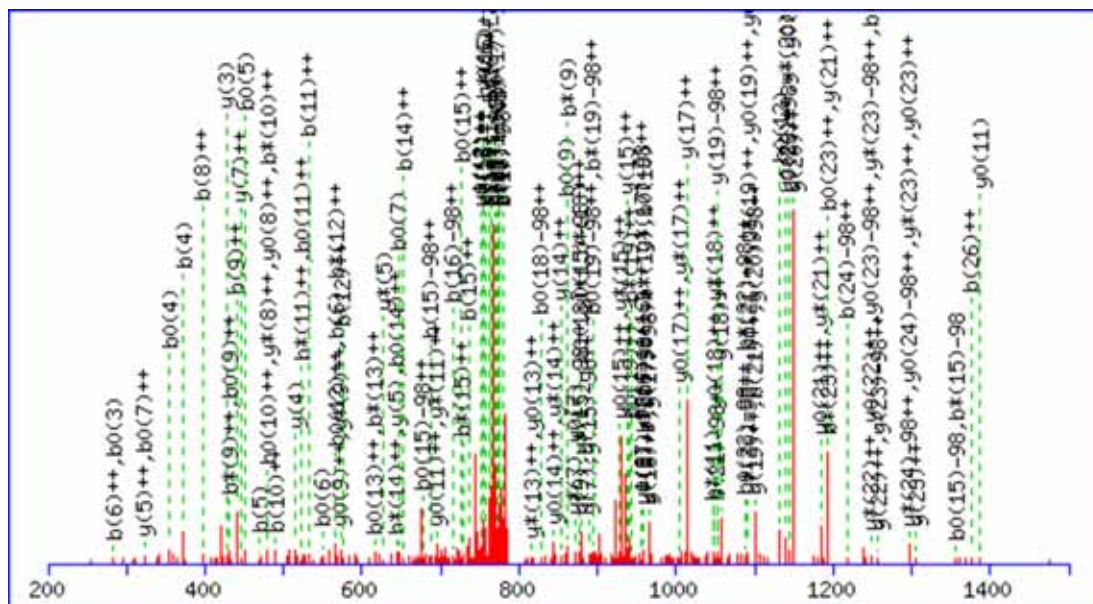

**Monoisotopic mass of neutral peptide Mr(calc):** 3175.3255

**Fixed modifications:** Carbamidomethyl (C) (apply to specified residues or termini only)

**Variable modifications:**

**N-term :** Dimethyl (N-term)

**S15 :** Phospho (ST), with neutral losses 0.0000(shown in table), 97.9769

**K29 :** Dimethyl (K)

**Ions Score:** 36 **Expect:** 0.022

**Matched b ions:** b(4), b(5), b(6), b(6)++, b(8)++, b(9)++, b(9), b(10)++, b(11)++, b(12)++, b(13), b(14)++, b(15)++, b(15)-98++, b(16)-98++, b(16)++, b(17)-98++, b(20)-98++, b(21)++, b(21)-98++, b(24)-98++, b(26)++

**Matched y ions:** y(3), y(4), y(5)++, y(5), y(6), y(7)++, y(7), y(12)++, y(14)++, y(15)++, y(15)-98++, y(16)++, y(17)++, y(17)-98++, y(18)++, y(19)++, y(19)-98++, y(20)++, y(20)-98++, y(21)++, y(21)-98++, y(22)++, y(23)++, y(23)-98++

**Precursor origin neutral loss:** +

## Peptide No.123

**DGTAPPPQSPSSPGSGQDEDWSDEESPRK**

**Confirmed sites:** @S:22

**Ambiguous sites:**

MS/MS Fragmentation of **DGTAPPPQSPSSPGSGQDEDWSDEESPRK**

Found in **PACN3\_MOUSE**, Protein kinase C and casein kinase II substrate protein 3 OS=Mus musculus GN=Pacsin3 PE=1 SV=1

Match to Query 7627: 3175.325838 from(1059.449222,3+)

Title: Elution from: 35.834 to 35.834 scan no 2935 cid35.00 polarity:+:MA10:m1s



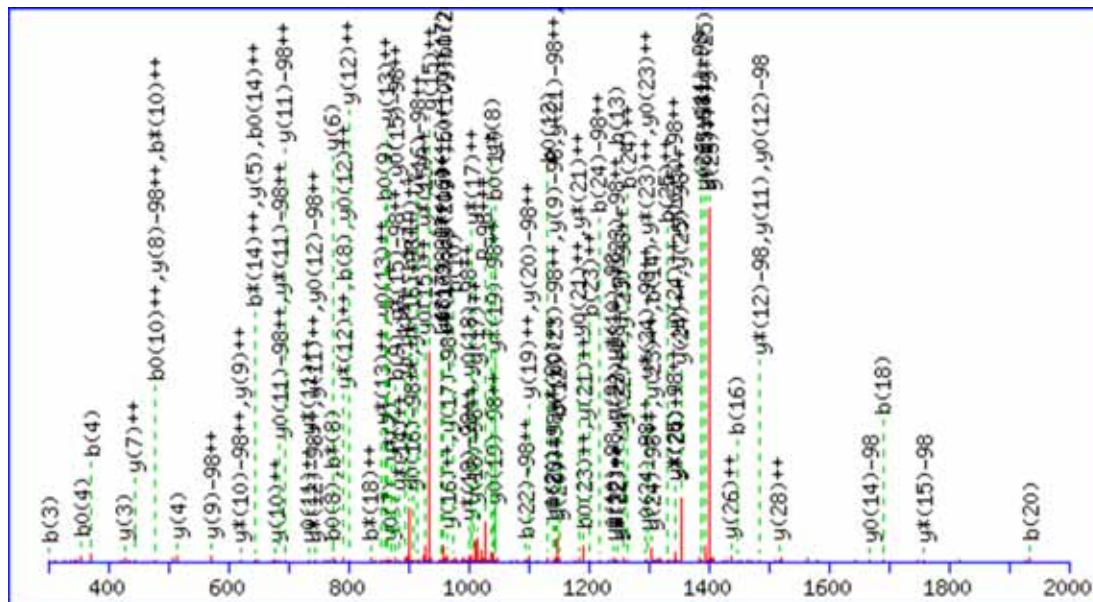

**Monoisotopic mass of neutral peptide Mr(calc):** 3175.3255

**Fixed modifications:** Carbamidomethyl (C) (apply to specified residues or termini only)

**Variable modifications:**

**N-term :** Dimethyl (N-term)

**S22 :** Phospho (ST), with neutral losses 0.0000(shown in table), 97.9769

**K29 :** Dimethyl (K)

**Ions Score:** 100 **Expect:** 9.1e-009

**Matched b ions:** b(3), b(4), b(8), b(9), b(10), b(12), b(13), b(14), b(16), b(18), b(20), b(22)++, b(22)-98++, b(23)++, b(24)-98++, b(24)++, b(25)++

**Matched y ions:** y(3), y(4), y(5), y(6), y(7)++, y(8)-98++, y(8)-98, y(9)-98++, y(9)++, y(9), y(9)-98, y(10)++, y(11)-98++, y(11)++, y(11), y(11)-98, y(12)++, y(13)++, y(14)++, y(15)++, y(16)++, y(16)-98++, y(17)++, y(17)-98++, y(18)-98++, y(19)++, y(20)++, y(20)-98++, y(21)++, y(21)-98++, y(22)++, y(23)-98++, y(23)++, y(24)++, y(24)-98++, y(25)-98++, y(25)++, y(26)++, y(26)-98++, y(28)++

**Precursor origin neutral loss:** +

## Peptide No.124

**DGTAPPPQSPSSPGSGQDEDWSDEESPRK**

**Confirmed sites:** @S:22

**Ambiguous sites:**

MS/MS Fragmentation of **DGTAPPPQSPSSPGSGQDEDWSDEESPRK**

Found in **PACN3\_MOUSE**, Protein kinase C and casein kinase II substrate protein 3 OS=Mus musculus GN=Pacsin3 PE=1 SV=1

Match to Query 8920: 3187.389282 from(1063.470370,3+)

Title: Elution from: 35.589 to 35.589 scan no 3008 cid35.00 polarity:+:MA10:m1s

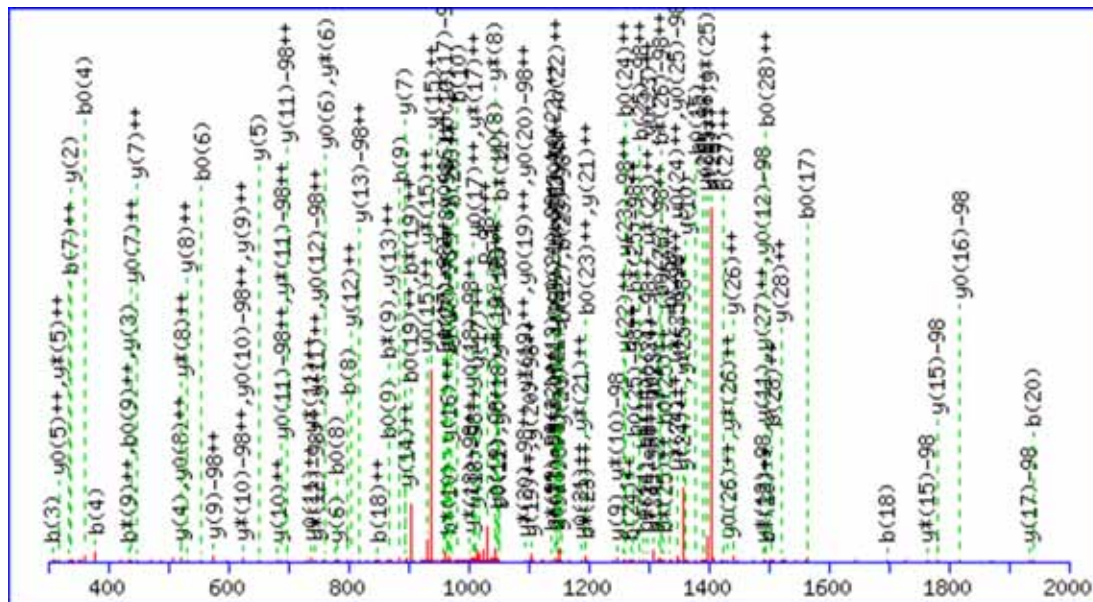

**Monoisotopic mass of neutral peptide Mr(calc):** 3187.3891

**Fixed modifications:** Carbamidomethyl (C) (apply to specified residues or termini only)

**Variable modifications:**

**N-term :** Dimethyl:2H(4)13C(2) (N-term)

**S22 :** Phospho (ST), with neutral losses 0.0000(shown in table), 97.9769

**K29 :** Dimethyl:2H(4)13C(2) (K)

**Ions Score:** 111 **Expect:** 7.5e-010

**Matched b ions:** b(3), b(4), b(7)++, b(8), b(9), b(10), b(12), b(18), b(18)++, b(20), b(20)++, b(22)++, b(23)-98++, b(24)++, b(25)-98++, b(25)++, b(27)++, b(28)++

**Matched y ions:** y(2), y(3), y(4), y(5), y(6), y(7)++, y(7), y(8)++, y(8)-98, y(9)-98++, y(9)++, y(9), y(9)-98, y(10)++, y(10), y(11), y(11)-98++, y(11)++, y(12)++, y(13)-98++, y(13)++, y(14)++, y(15)-98, y(15)++, y(16)++, y(17)-98, y(17)-98++, y(17)++, y(18)-98++, y(19)++, y(20)++, y(20)-98++, y(21)++, y(21)-98++, y(22)++, y(23)-98++, y(23)++, y(24)++, y(24)-98++, y(25)++, y(25)-98++, y(26)++, y(26)-98++, y(27)++, y(28)++

**Precursor origin neutral loss:** +

## Peptide No.125

**DGTGGMSIYGETFPDENFK**

**Confirmed sites:** @T:3,@Y:9,@T:12

**Ambiguous sites:**

**MS/MS Fragmentation of DGTGGMSIYGETFPDENFK**

Found in **PPIC\_MOUSE**, Peptidyl-prolyl cis-trans isomerase C OS=Mus musculus GN=Ppic PE=1 SV=1

Match to Query 6533: 2381.867272 from(596.474094,+)

Title: Elution from: 37.159 to 37.159 scan no 3119 cid35.00 polarity:+:MA10:m1s

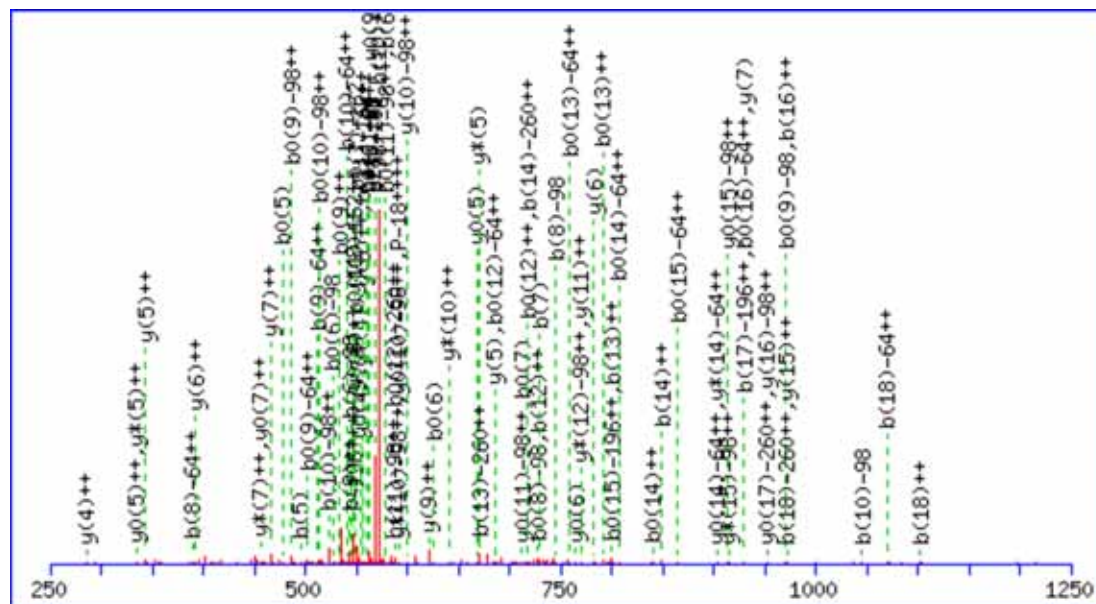

**Monoisotopic mass of neutral peptide Mr(calc):** 2381.8665

**Fixed modifications:** Carbamidomethyl (C) (apply to specified residues or termini only)

**Variable modifications:**

**N-term :** Dimethyl (N-term)

**T3 :** Phospho (ST), with neutral losses 0.0000(shown in table), 97.9769

**M6 :** Oxidation (M), with neutral losses 0.0000(shown in table), 63.9983

**Y9 :** Phospho (Y)

**T12 :** Phospho (ST), with neutral losses 0.0000(shown in table), 97.9769

**K19 :** Dimethyl:2H(4)13C(2) (K)

**Ions Score:** 33 **Expect:** 0.0097

**Matched b ions:** b(5), b(6)-98, b(7), b(8)-98, b(9)++, b(10)++, b(10)-98, b(10)-98++, b(11)-98++, b(12)++, b(12)-98++, b(13)++, b(14)-98++, b(14)++, b(16)++, b(17)-196++, b(18)++

**Matched y ions:** y(4)++, y(5)++, y(5), y(6)++, y(6), y(7)++, y(7), y(8)++, y(9)-98++, y(9)++, y(10)-98++, y(11)++, y(15)++, y(16)-98++, y(18)-98++

**Precursor origin neutral loss:** +

## Peptide No.126

**DIDLFGSDEEEEDK**

**Confirmed sites:** @S:7

**Ambiguous sites:**

**MS/MS Fragmentation of DIDLFGSDEEEEDK**

Found in **EF1D\_MOUSE**, Elongation factor 1-delta OS=Mus musculus GN=Eef1d PE=1 SV=3

Match to Query 4162: 1775.703718 from(888.859135,2+)

Title: Elution from: 58.489 to 58.489 scan no 5796 cid35.00 polarity:+:MA10

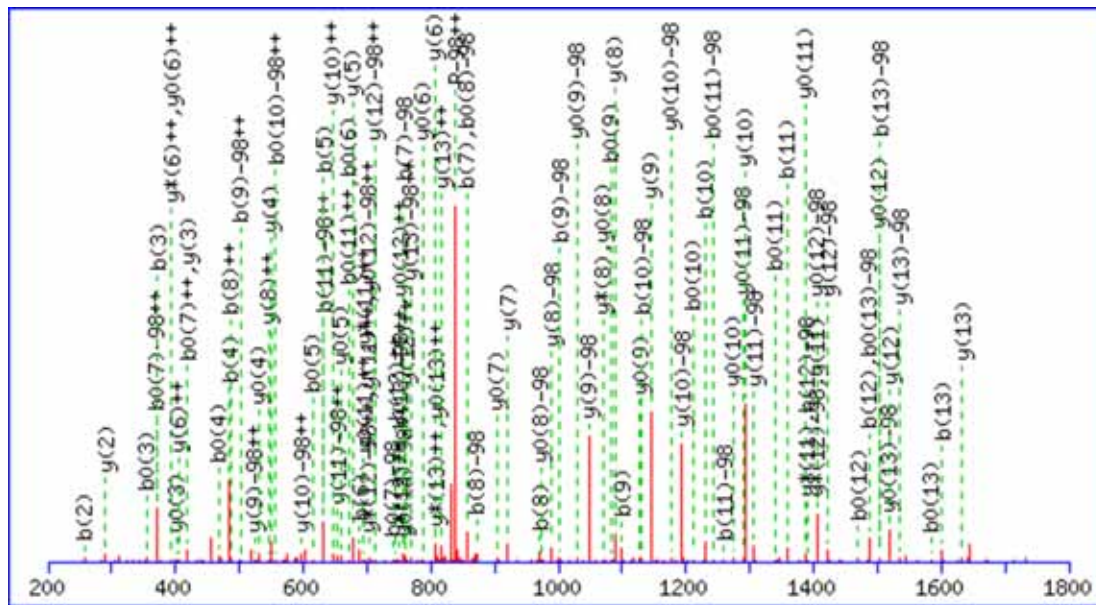

**Monoisotopic mass of neutral peptide Mr(calc):** 1775.7026

**Fixed modifications:** Carbamidomethyl (C) (apply to specified residues or termini only)

**Variable modifications:**

**N-term :** Dimethyl (N-term)

**S7 :** Phospho (ST), with neutral losses 97.9769(shown in table), 0.0000

**K14 :** Dimethyl (K)

**Ions Score:** 88 **Expect:** 3.2e-008

**Matched b ions:** b(2), b(3), b(4), b(5), b(6), b(7)-98, b(7), b(8)-98, b(8), b(8)++, b(9), b(9)-98, b(9)-98++, b(10), b(10)-98, b(11), b(11)-98++, b(11)-98, b(12), b(12)-98, b(12)++, b(13), b(13)-98++, b(13)-98

**Matched y ions:** y(2), y(3), y(4), y(5), y(6), y(6)++, y(7), y(8)-98, y(8), y(8)++, y(9)-98, y(9), y(9)-98++, y(10)-98, y(10), y(10)++, y(10)-98++, y(11), y(11)-98, y(11)++, y(11)-98++, y(12), y(12)-98, y(12)-98++, y(12)++, y(13), y(13)++, y(13)-98, y(13)-98++

**Precursor origin neutral loss:** +

## Peptide No.127

**DIDLFGSDEEEEDK**

**Confirmed sites:** @S:7

**Ambiguous sites:**

**MS/MS Fragmentation of **DIDLFGSDEEEEDK****

Found in **EF1D\_MOUSE**, Elongation factor 1-delta OS=Mus musculus GN=Eef1d PE=1 SV=3

Match to Query 4859: 1787.766226 from(894.890389,2+)

Title: Elution from: 57.968 to 57.968 scan no 5806 cid35.00 polarity:+:MA10



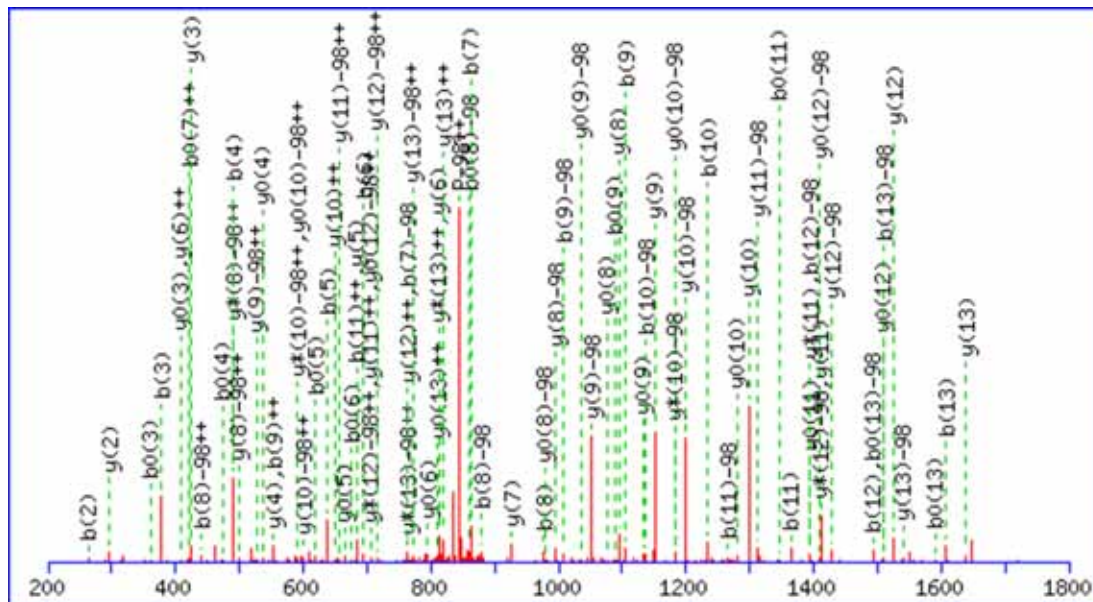

**Monoisotopic mass of neutral peptide Mr(calc):** 1787.7662

**Fixed modifications:** Carbamidomethyl (C) (apply to specified residues or termini only)

**Variable modifications:**

**N-term :** Dimethyl:2H(4)13C(2) (N-term)

**S7 :** Phospho (ST), with neutral losses 97.9769(shown in table), 0.0000

**K14 :** Dimethyl:2H(4)13C(2) (K)

**Ions Score:** 85 **Expect:** 1.3e-007

**Matched b ions:** b(2), b(3), b(4), b(5), b(6), b(7)-98, b(7), b(8)-98++, b(8)-98, b(8), b(9)++, b(9), b(9)-98, b(10), b(10)-98, b(11)++, b(11), b(11)-98, b(12), b(12)-98, b(13), b(13)-98

**Matched y ions:** y(2), y(3), y(4), y(5), y(6), y(6)++, y(7), y(8)-98, y(8), y(8)-98++, y(9)-98, y(9), y(9)-98++, y(10)-98, y(10), y(10)-98++, y(10)++, y(11), y(11)-98, y(11)++, y(11)-98++, y(12), y(12)-98, y(12)-98++, y(12)++, y(13), y(13)++, y(13)-98, y(13)-98++

**Precursor origin neutral loss:** +

## Peptide No.128

**DIDLFGSDEEEEDKEAAR**

**Confirmed sites:** @S:7

**Ambiguous sites:**

MS/MS Fragmentation of **DIDLFGSDEEEEDKEAAR**

Found in **EF1D\_MOUSE**, Elongation factor 1-delta OS=Mus musculus GN=Eef1d PE=1 SV=3

Match to Query 5566: 2202.923127 from(735.314985,3+)

Title: Elution from: 52.209 to 52.209 scan no 4925 cid35.00 polarity:+:MA10:m1s

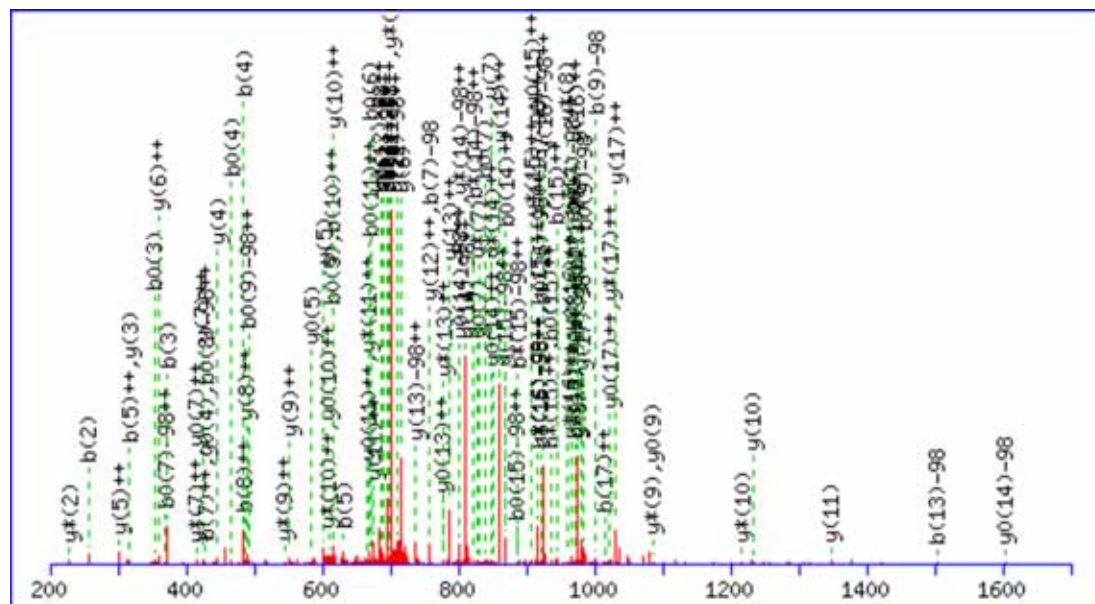

**Monoisotopic mass of neutral peptide Mr(calc):** 2202.9205

**Fixed modifications:** Carbamidomethyl (C) (apply to specified residues or termini only)

**Variable modifications:**

**N-term :** Dimethyl (N-term)

**S7 :** Phospho (ST), with neutral losses 97.9769(shown in table), 0.0000

**K14 :** Dimethyl (K)

**Ions Score:** 67 **Expect:** 9.4e-006

**Matched b ions:** b(2), b(3), b(4), b(5)++, b(5), b(6), b(7)-98, b(7)++, b(8)++, b(8), b(9)-98, b(10)++, b(12)-98++, b(13)-98, b(15)++, b(17)-98++, b(17)++

**Matched y ions:** y(3), y(4), y(5)++, y(5), y(6)++, y(6), y(7)++, y(7), y(8)++, y(8), y(9)++, y(10)++, y(10), y(11), y(11)++, y(12)++, y(12)-98++, y(13)++, y(13)-98++, y(14)-98++, y(14)++, y(15)++, y(15)-98++, y(16)++, y(16)-98++, y(17)++, y(17)-98++

**Precursor origin neutral loss:** +

## Peptide No.129

**DIDLFGSDEEEEDKEAAR**

**Confirmed sites:** @S:7

**Ambiguous sites:**

**MS/MS Fragmentation of** **DIDLFGSDEEEEDKEAAR**

Found in **EF1D\_MOUSE**, Elongation factor 1-delta OS=Mus musculus GN=Eef1d PE=1 SV=3

Match to Query 5639: 2214.986958 from(739.336262,3+)

Title: Elution from: 52.130 to 52.130 scan no 4915 cid35.00 polarity:+:MA10:m1s

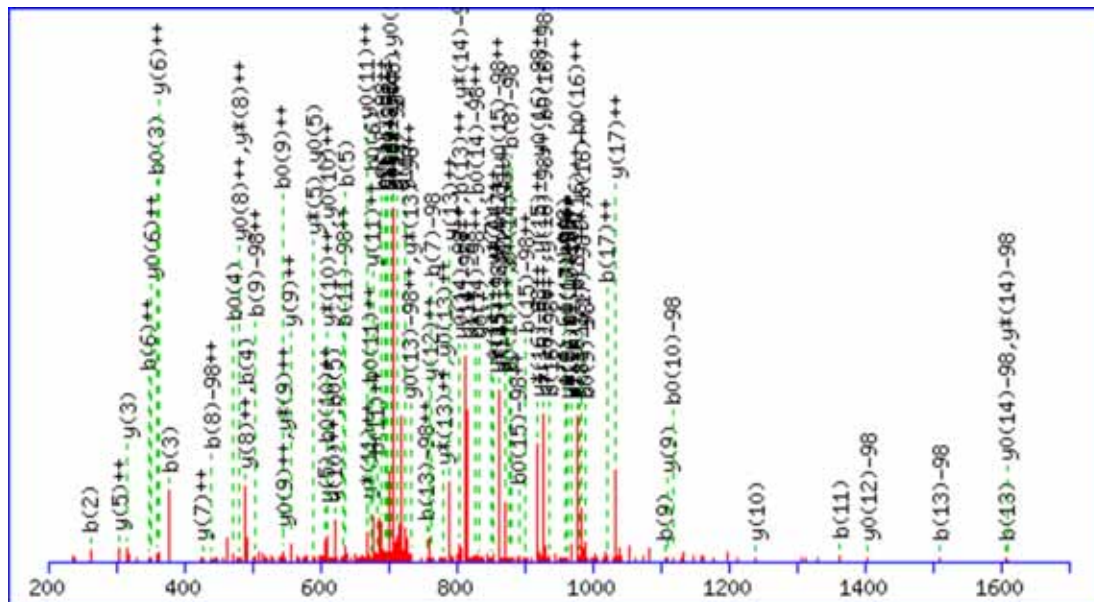

**Monoisotopic mass of neutral peptide Mr(calc):** 2214.9841

**Fixed modifications:** Carbamidomethyl (C) (apply to specified residues or termini only)

**Variable modifications:**

**N-term :** Dimethyl:2H(4)13C(2) (N-term)

**S7 :** Phospho (ST), with neutral losses 0.0000(shown in table), 97.9769

**K14 :** Dimethyl:2H(4)13C(2) (K)

**Ions Score:** 61 **Expect:** 5e-005

**Matched b ions:** b(2), b(3), b(4), b(5), b(6)++, b(6), b(7)-98, b(7), b(8), b(8)-98, b(8)-98, b(9)-98, b(9), b(11), b(11)-98, b(11)++, b(12)-98, b(13)-98, b(13), b(13)++, b(13)-98, b(15)-98, b(16)++, b(16)-98, b(17)++

**Matched y ions:** y(3), y(5)++, y(5), y(6)++, y(6), y(7)++, y(7), y(8)++, y(8), y(9)++, y(9), y(10)++, y(10), y(11)++, y(12)++, y(12)-98, y(13)++, y(14)-98, y(14)++, y(15)++, y(15)-98, y(16)++, y(16)-98, y(17)++, y(17)-98

**Precursor origin neutral loss:** +

## Peptide No.130

**DIIRQPSEEEIIK**

**Confirmed sites:** @S:7

**Ambiguous sites:**

MS/MS Fragmentation of **DIIRQPSEEEIIK**

Found in **PEA15\_MOUSE**, Astrocytic phosphoprotein PEA-15 OS=Mus musculus GN=Pea15 PE=1 SV=1

Match to Query 3093: 1704.871677 from(569.297835,3+)

Title: Elution from: 44.838 to 44.838 scan no 4103 cid35.00 polarity:+:MA10:m1s

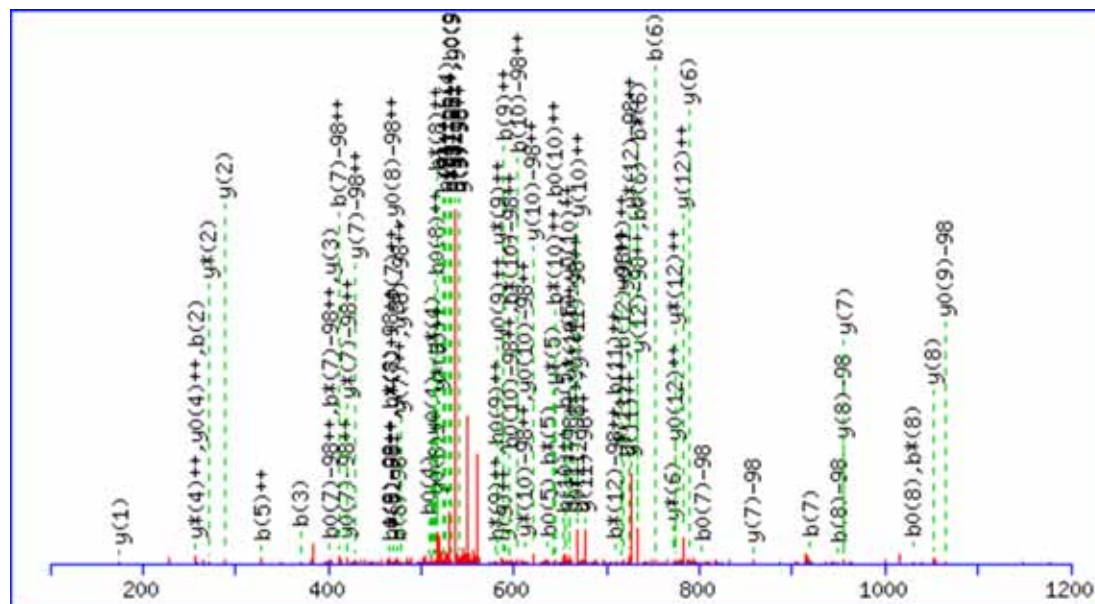

**Monoisotopic mass of neutral peptide Mr(calc):** 1704.8699

**Fixed modifications:** Carbamidomethyl (C) (apply to specified residues or termini only)

**Variable modifications:**

**N-term :** Dimethyl (N-term)

**S7 :** Phospho (ST), with neutral losses 97.9769(shown in table), 0.0000

**K13 :** Dimethyl (K)

**Ions Score:** 31 **Expect:** 0.034

**Matched b ions:** b(2), b(3), b(4), b(5)++, b(5), b(6), b(7)-98++, b(7), b(8)-98, b(8)-98++, b(8)++, b(9)-98++, b(9)++, b(10)++, b(10)-98++, b(11)-98++, b(11)++, b(12)-98++

**Matched y ions:** y(1), y(2), y(3), y(4), y(5), y(6), y(7), y(7)-98++, y(7)-98, y(7)++, y(8), y(8)-98, y(8)-98++, y(8)++, y(9)-98++, y(9)++, y(10)++, y(10)-98++, y(11)++, y(11)-98++, y(12)++, y(12)-98++

**Precursor origin neutral loss:** +

## Peptide No.131

**DIIRQPSEEEIIK**

**Confirmed sites:** @S:7

**Ambiguous sites:**

MS/MS Fragmentation of **DIIRQPSEEEIIK**

Found in **PEA15\_MOUSE**, Astrocytic phosphoprotein PEA-15 OS=Mus musculus GN=Pea15 PE=1 SV=1

Match to Query 2961: 1716.934353 from(573.318727,3+)

Title: Elution from: 44.801 to 44.801 scan no 4073 cid35.00 polarity:+:MA10



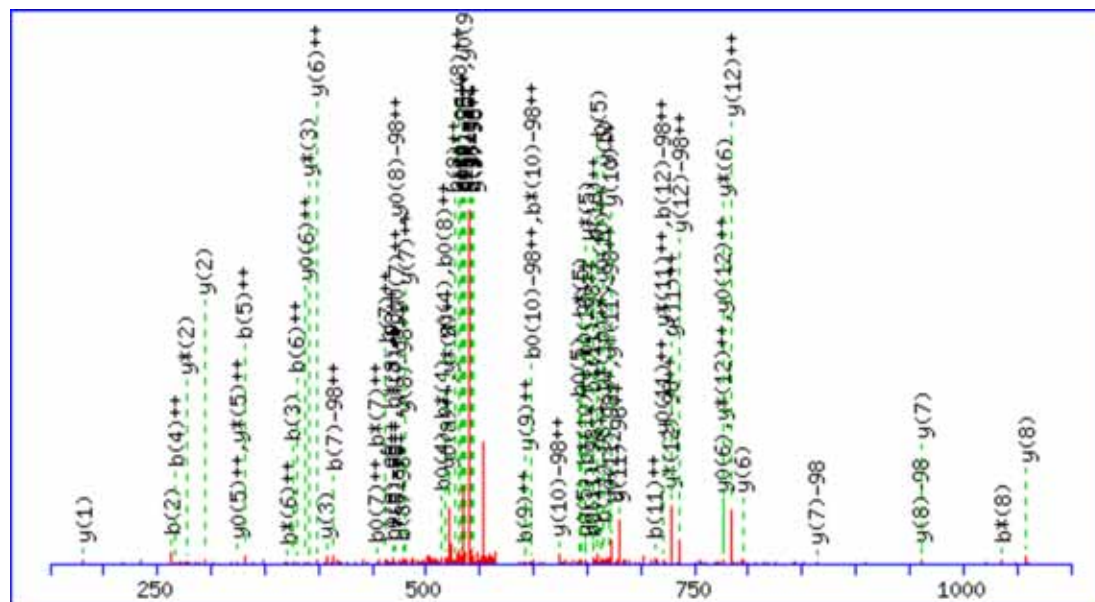

**Monoisotopic mass of neutral peptide Mr(calc):** 1716.9335

**Fixed modifications:** Carbamidomethyl (C) (apply to specified residues or termini only)

**Variable modifications:**

**N-term :** Dimethyl:2H(4)13C(2) (N-term)

**S7 :** Phospho (ST), with neutral losses 97.9769(shown in table), 0.0000

**K13 :** Dimethyl:2H(4)13C(2) (K)

**Ions Score:** 31 **Expect:** 0.037

**Matched b ions:** b(2), b(3), b(4)++, b(4), b(5)++, b(5), b(6)++, b(7)-98++, b(7)++, b(8)-98++, b(8)++, b(9)-98++, b(9)++, b(10)++, b(11)++, b(11)-98++, b(12)-98++

**Matched y ions:** y(1), y(2), y(3), y(4), y(5), y(6), y(6)++, y(7), y(7)-98, y(7)++, y(8), y(8)-98, y(8)-98++, y(8)++, y(9)-98++, y(9)++, y(10)++, y(10)-98++, y(11)-98++, y(11)++, y(12)++, y(12)-98++

**Precursor origin neutral loss:** +

## Peptide No.132

**DISPEEIDLK**

**Confirmed sites:** @S:3

**Ambiguous sites:**

MS/MS Fragmentation of **DISPEEIDLK**

Found in **SRBS1\_MOUSE**, Sorbin and SH3 domain-containing protein 1 OS=Mus musculus GN=Sorbs1 PE=1 SV=2

Match to Query 1010: 1293.610008 from(647.812280,2+)

Title: Elution from: 48.890 to 48.890 scan no 4459 cid35.00 polarity:+:MA10

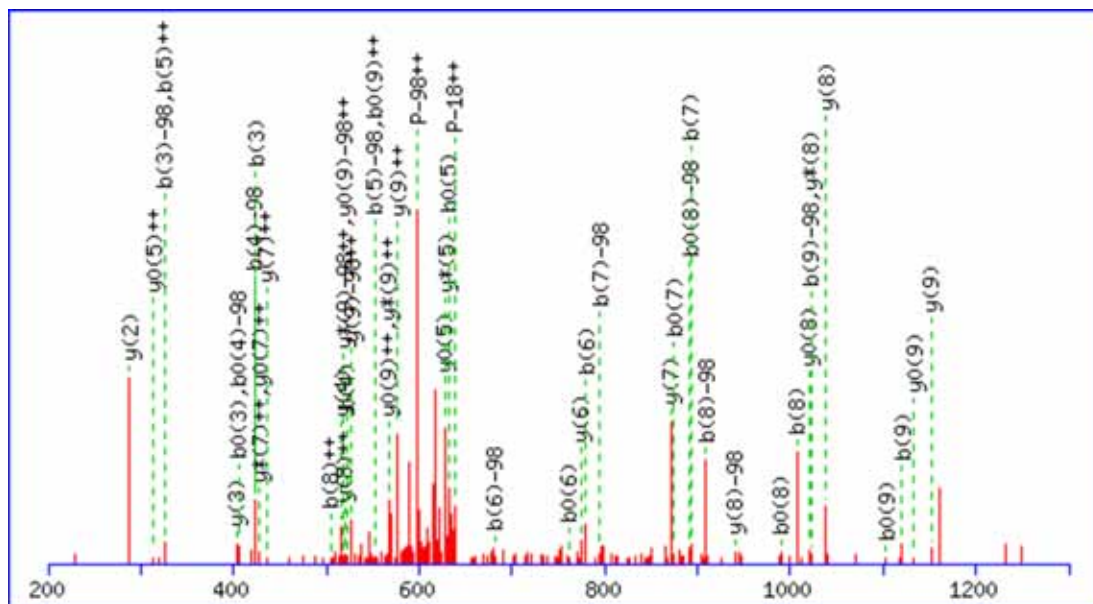

**Monoisotopic mass of neutral peptide Mr(calc):** 1293.6105

**Fixed modifications:** Carbamidomethyl (C) (apply to specified residues or termini only)

**Variable modifications:**

**N-term :** Dimethyl (N-term)

**S3 :** Phospho (ST), with neutral losses 0.0000(shown in table), 97.9769

**K10 :** Dimethyl (K)

**Ions Score:** 51 **Expect:** 0.00027

**Matched b ions:** b(3), b(3)-98, b(4)-98, b(4), b(5)++, b(5)-98, b(6), b(6)-98, b(7), b(7)-98, b(8), b(8)-98, b(8)++, b(9), b(9)-98

**Matched y ions:** y(2), y(3), y(4), y(6), y(7), y(7)++, y(8), y(8)++, y(8)-98, y(9)-98++, y(9), y(9)++

**Precursor origin neutral loss:** +

## Peptide No.133

**DISPEEIDLK**

**Confirmed sites:** @S:3

**Ambiguous sites:**

MS/MS Fragmentation of **DISPEEIDLK**

Found in **SRBS1\_MOUSE**, Sorbin and SH3 domain-containing protein 1 OS=Mus musculus GN=Sorbs1 PE=1 SV=2

Match to Query 1284: 1305.674388 from(653.844470,2+)

Title: Elution from: 48.958 to 48.958 scan no 4561 cid35.00 polarity:+:MA10

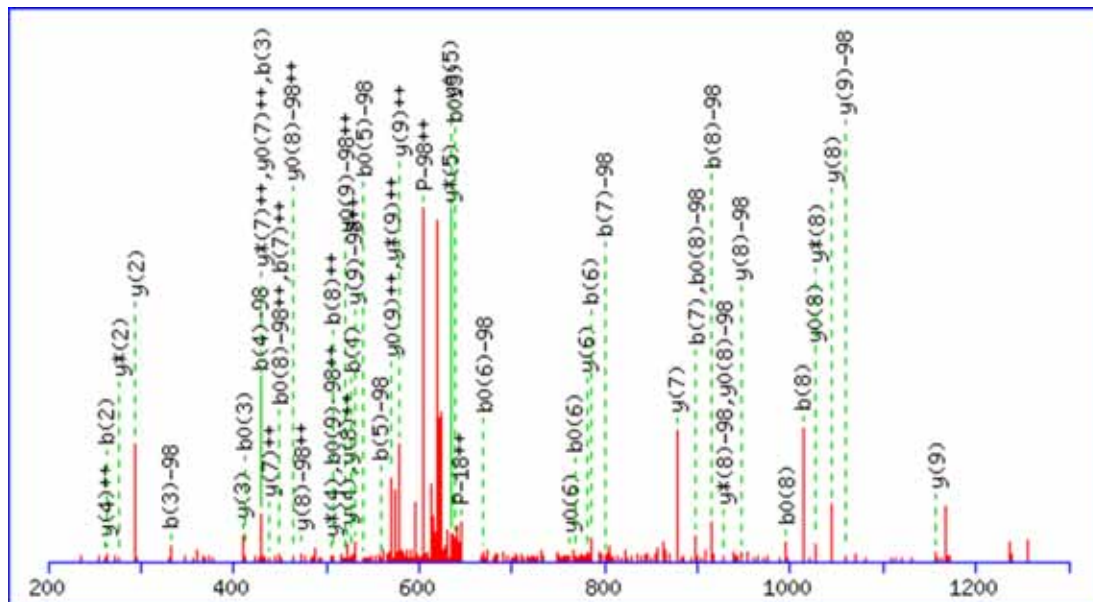

**Monoisotopic mass of neutral peptide Mr(calc):** 1305.6741

**Fixed modifications:** Carbamidomethyl (C) (apply to specified residues or termini only)

**Variable modifications:**

**N-term :** Dimethyl:2H(4)13C(2) (N-term)

**S3 :** Phospho (ST), with neutral losses 0.0000(shown in table), 97.9769

**K10 :** Dimethyl:2H(4)13C(2) (K)

**Ions Score:** 31 **Expect:** 0.026

**Matched b ions:** b(2), b(3), b(3)-98, b(4)-98, b(4), b(5)-98, b(6), b(7), b(7)++, b(7)-98, b(8), b(8)-98, b(8)++

**Matched y ions:** y(2), y(3), y(4), y(4)++, y(6), y(7), y(7)++, y(8), y(8)++, y(8)-98++, y(8)-98, y(9)-98++, y(9), y(9)-98, y(9)++

**Precursor origin neutral loss:** +

## Peptide No.134

**DLAVDSASPVYQAVIK**

**Confirmed sites:** @S:8

**Ambiguous sites:**

MS/MS Fragmentation of **DLAVDSASPVYQAVIK**

Found in **LDB3\_MOUSE**, LIM domain-binding protein 3 OS=Mus musculus GN=Ldb3 PE=1 SV=1

Match to Query 5058: 1810.911610 from(906.463081,2+)

Title: Elution from: 57.005 to 57.005 scan no 5710 cid35.00 polarity:+:MA10

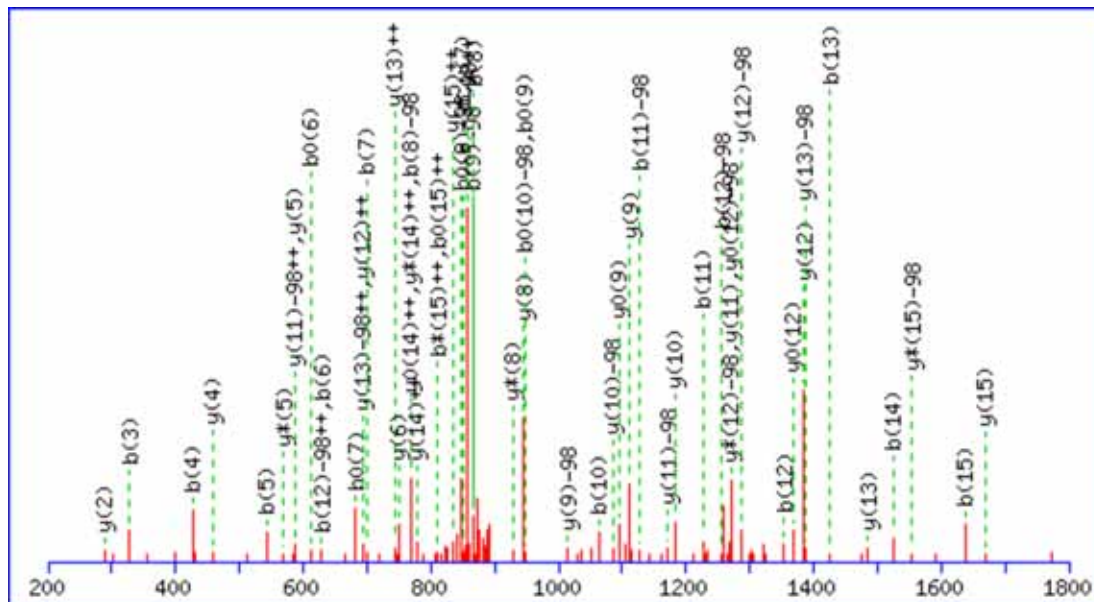

**Monoisotopic mass of neutral peptide Mr(calc):** 1810.9118

**Fixed modifications:** Carbamidomethyl (C) (apply to specified residues or termini only)

**Variable modifications:**

**N-term :** Dimethyl (N-term)

**S8 :** Phospho (ST), with neutral losses 0.0000(shown in table), 97.9769

**K16 :** Dimethyl (K)

**Ions Score:** 85 **Expect:** 1.6e-007

**Matched b ions:** b(3), b(4), b(5), b(6), b(7), b(8)-98, b(8), b(9)-98, b(10), b(11), b(11)-98, b(12)-98++, b(12), b(12)-98, b(13), b(14), b(15)

**Matched y ions:** y(2), y(4), y(5), y(6), y(7), y(8), y(9), y(9)-98, y(10)-98, y(10), y(11), y(11)-98++, y(11)-98, y(12), y(12)-98, y(12)++, y(13), y(13)-98++, y(13)++, y(13)-98, y(14)++, y(15), y(15)++

**Precursor origin neutral loss:** +

## Peptide No.135

**DLAVDSASPVYQAVIK**

**Confirmed sites:** @S:8

**Ambiguous sites:**

MS/MS Fragmentation of **DLAVDSASPVYQAVIK**

Found in **LDB3\_MOUSE**, LIM domain-binding protein 3 OS=Mus musculus GN=Ldb3 PE=1 SV=1

Match to Query 5156: 1822.976674 from(912.495613,2+)

Title: Elution from: 57.044 to 57.044 scan no 5715 cid35.00 polarity:+:MA10



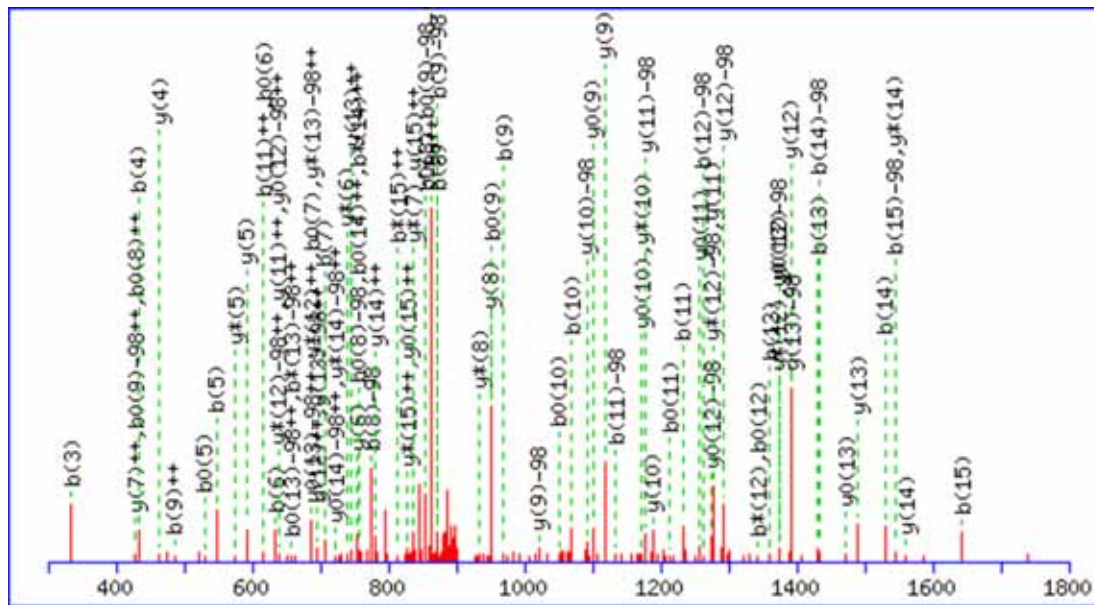

**Monoisotopic mass of neutral peptide Mr(calc):** 1822.9754

**Fixed modifications:** Carbamidomethyl (C) (apply to specified residues or termini only)

**Variable modifications:**

**N-term :** Dimethyl:2H(4)13C(2) (N-term)

**S8 :** Phospho (ST), with neutral losses 0.0000(shown in table), 97.9769

**K16 :** Dimethyl:2H(4)13C(2) (K)

**Ions Score:** 85 **Expect:** 1.7e-007

**Matched b ions:** b(3), b(4), b(5), b(6), b(7), b(8)-98, b(8), b(9)++, b(9), b(9)-98, b(10), b(11), b(11)++, b(11)-98, b(12), b(12)-98, b(13), b(14), b(14)-98, b(15)-98, b(15)

**Matched y ions:** y(4), y(5), y(6), y(7)++, y(7), y(8), y(9), y(9)-98, y(10), y(10)-98, y(11), y(11)-98, y(11)++, y(12), y(12)-98, y(12)++, y(13), y(13)-98++, y(13)-98, y(13)++, y(14), y(14)++, y(15)++

**Precursor origin neutral loss:** +

## Peptide No.136

**DLSSSPPGPYGQEMYVFR**

**Confirmed sites:** @S:5

**Ambiguous sites:**

MS/MS Fragmentation of **DLSSSPPGPYGQEMYVFR**

Found in **AAKB2\_MOUSE**, 5'-AMP-activated protein kinase subunit beta-2 OS=Mus musculus  
GN=Prkab2 PE=2 SV=1

Match to Query 5734: 2152.919216 from(1077.466884,2+)

Title: Elution from: 55.295 to 55.295 scan no 5293 cid35.00 polarity:+:MA10:m1s

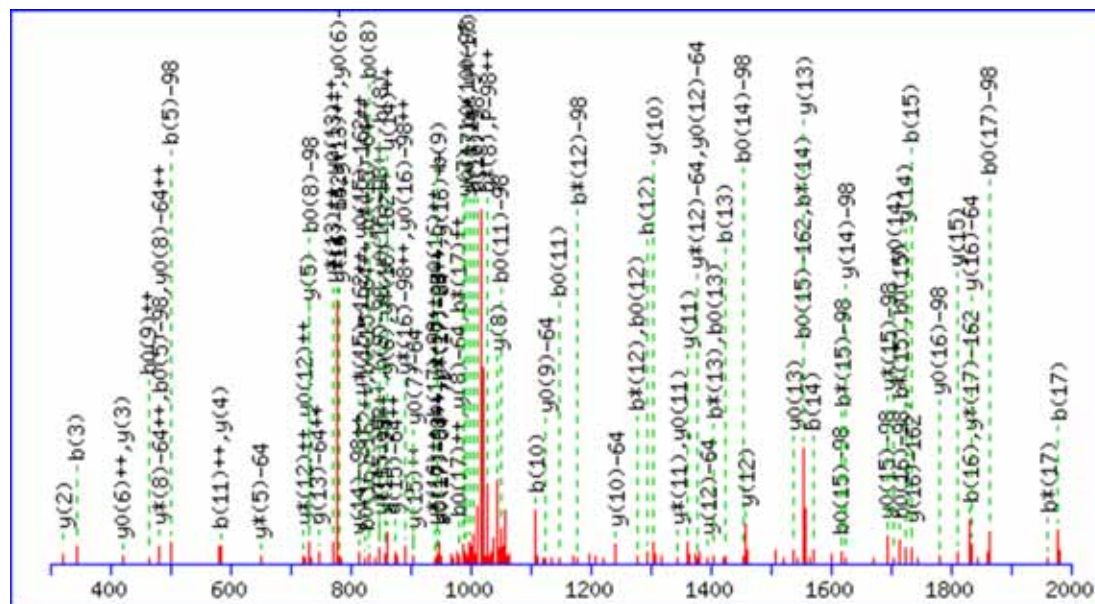

**Monoisotopic mass of neutral peptide Mr(calc):** 2152.9177

**Fixed modifications:** Carbamidomethyl (C) (apply to specified residues or termini only)

**Variable modifications:**

**N-term :** Dimethyl (N-term)

**S5 :** Phospho (ST), with neutral losses 0.0000(shown in table), 97.9769

**M14 :** Oxidation (M), with neutral losses 0.0000(shown in table), 63.9983

**Ions Score:** 72 **Expect:** 3.1e-006

**Matched b ions:** b(3), b(5)-98, b(8), b(9)-98, b(9), b(10), b(10)-98, b(11)++, b(12), b(13), b(14), b(15), b(16), b(17), b(17)-98++

**Matched y ions:** y(2), y(3), y(4), y(5), y(6), y(7), y(8), y(10), y(11), y(12), y(13)++, y(13), y(14)++, y(14), y(14)-98++, y(14)-98, y(15), y(15)-98++, y(15)++, y(16)++, y(17)++

**Precursor origin neutral loss:** +

## Peptide No.137

**DLTHSDSESSLHMSDR**

**Confirmed sites:** @T:3,@S:7

**Ambiguous sites:**

**MS/MS Fragmentation of DLTHSDSESSLHMSDR**

Found in **STIM1\_MOUSE**, Stromal interaction molecule 1 OS=Mus musculus GN=Stim1 PE=1 SV=1

Match to Query 5117: 2025.762588 from(676.261472,3+)

Title: Elution from: 27.034 to 27.034 scan no 1718 cid35.00 polarity:+:MA10:m1s



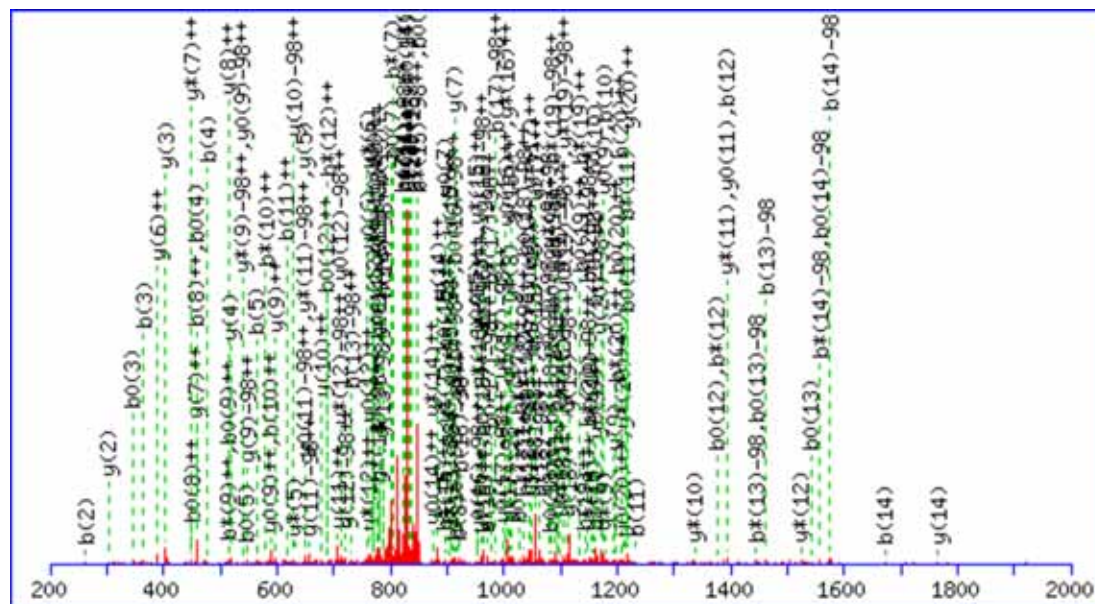

**Monoisotopic mass of neutral peptide Mr(calc):** 2586.1481

**Fixed modifications:** Carbamidomethyl (C) (apply to specified residues or termini only)

**Variable modifications:**

**N-term :** Dimethyl:2H(4)13C(2) (N-term)

**S13 :** Phospho (ST), with neutral losses 97.9769(shown in table), 0.0000

**Ions Score:** 62 **Expect:** 5.6e-005

**Matched b ions:** b(2), b(3), b(4), b(5), b(7), b(8)++, b(8), b(9), b(10)++, b(10), b(11)++, b(11), b(12), b(13)-98, b(13)-98++, b(13)++, b(14)-98, b(14), b(14)-98++, b(14)++, b(15)++, b(16)-98++, b(16)++, b(17)++, b(17)-98++, b(18)++, b(18)-98++, b(19)-98++, b(19)++, b(20)++, b(20)-98++

**Matched y ions:** y(2), y(3), y(4), y(5), y(6)++, y(6), y(7)++, y(7), y(8)++, y(9)-98++, y(9)++, y(9), y(9)-98, y(10)-98++, y(10)++, y(11)++, y(11)-98++, y(12)-98++, y(12)++, y(13)-98++, y(13)++, y(14)++, y(14), y(14)-98++, y(15)++, y(15)-98++, y(16)-98++, y(16)++, y(17)++, y(17)-98++, y(18)-98++, y(18)++, y(19)-98++, y(19)++, y(20)-98++, y(20)++

**Precursor origin neutral loss:** +

## Peptide No.139

**DMSPSAETEAPLAK**

**Confirmed sites: @S:3**

**Ambiguous sites:**

MS/MS Fragmentation of **DMSPSAETEAPLAK**

Found in **MAP4\_MOUSE**, Microtubule-associated protein 4 OS=Mus musculus GN=Map4 PE=1 SV=3

Match to Query 3087: 1597.695932 from(799.855242,2+)

Title: Elution from: 33.064 to 33.064 scan no 2723 cid35.00 polarity:+:MA10



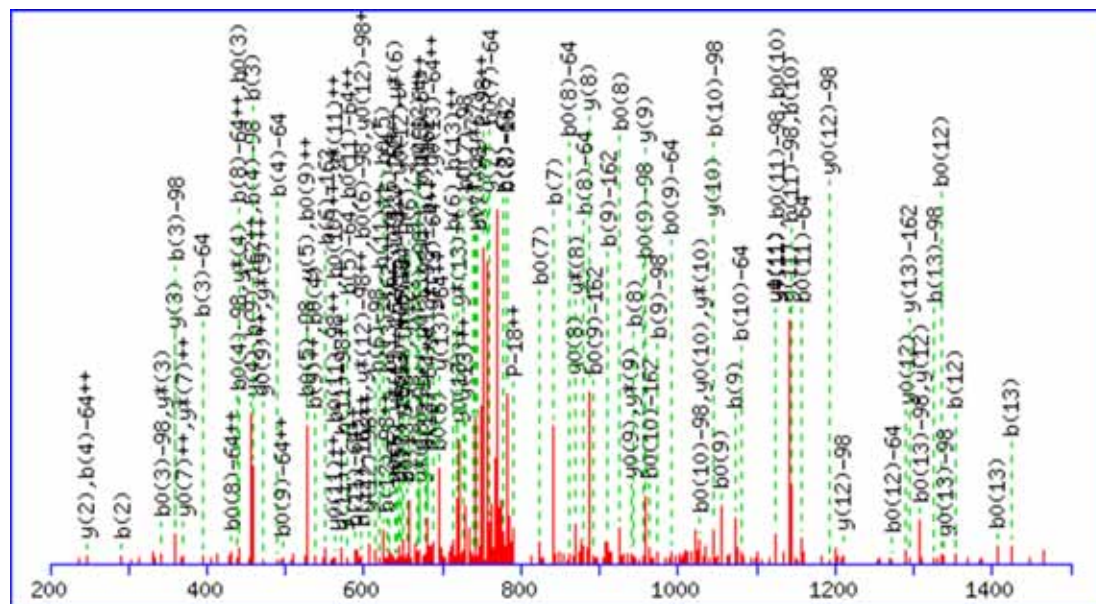

**Monoisotopic mass of neutral peptide Mr(calc):** 1597.6946

**Fixed modifications:** Carbamidomethyl (C) (apply to specified residues or termini only)

**Variable modifications:**

**N-term :** Dimethyl (N-term)

**M2 :** Oxidation (M), with neutral losses 0.0000(shown in table), 63.9983

**S3 :** Phospho (ST), with neutral losses 0.0000(shown in table), 97.9769

**K14 :** Dimethyl (K)

**Ions Score:** 77 **Expect:** 5.8e-007

**Matched b ions:** b(2), b(3)-98, b(3), b(4)-98, b(5), b(6)-98, b(6), b(7), b(7)-98, b(8), b(9), b(9)++, b(9)-98, b(10), b(10)-98, b(11)-98, b(11)-98++, b(11)++, b(12), b(12)-98++, b(12)++, b(13), b(13)-98, b(13)++

**Matched y ions:** y(2), y(3), y(4), y(5), y(6), y(7), y(8), y(9), y(10), y(11), y(11)++, y(12), y(12)-98++, y(12)++, y(12)-98, y(13)++, y(13)-98++

**Precursor origin neutral loss:** +

## Peptide No.140

**DMSPSAETEAPLAK**

**Confirmed sites:** @S:5

**Ambiguous sites:**

MS/MS Fragmentation of **DMSPSAETEAPLAK**

Found in **MAP4\_MOUSE**, Microtubule-associated protein 4 OS=Mus musculus GN=Map4 PE=1 SV=3

Match to Query 2667: 1597.696576 from(799.855564,2+)

Title: Elution from: 32.936 to 32.936 scan no 2536 cid35.00 polarity:+MA10:m1s

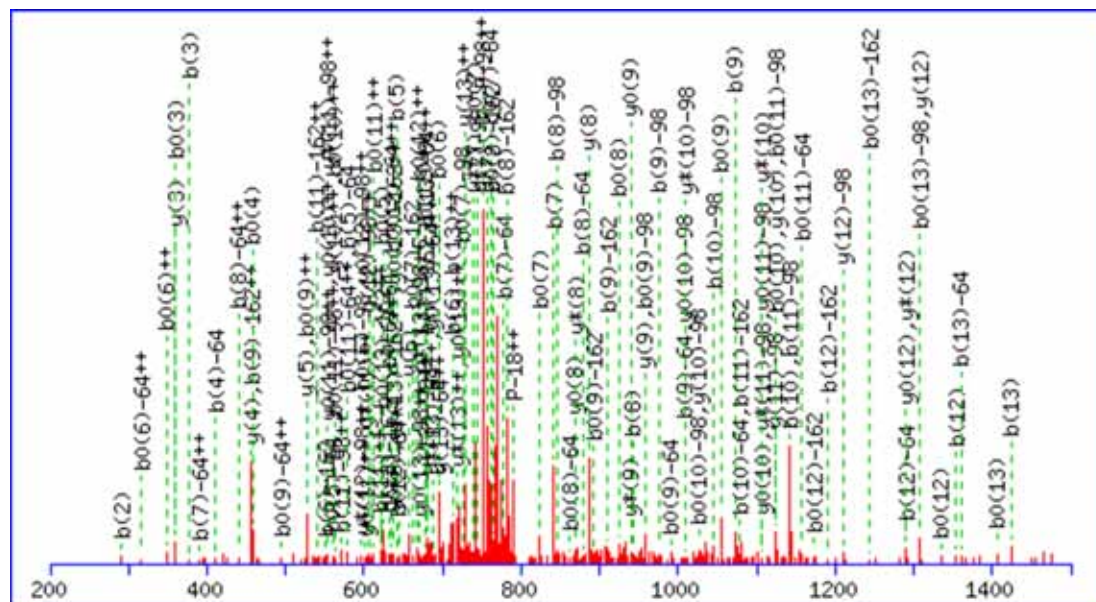

**Monoisotopic mass of neutral peptide Mr(calc):** 1597.6946

**Fixed modifications:** Carbamidomethyl (C) (apply to specified residues or termini only)

**Variable modifications:**

**N-term :** Dimethyl (N-term)

**M2 :** Oxidation (M), with neutral losses 0.0000(shown in table), 63.9983

**S5 :** Phospho (ST), with neutral losses 0.0000(shown in table), 97.9769

**K14 :** Dimethyl (K)

**Ions Score:** 52 **Expect:** 0.00021

**Matched b ions:** b(2), b(3), b(5), b(6), b(7), b(7)-98, b(8)-98, b(8), b(9), b(9)-98, b(10), b(10)-98, b(11)-98, b(11)-98++, b(11)++, b(12), b(12)++, b(13), b(13)++

**Matched y ions:** y(3), y(4), y(5), y(6), y(7), y(8), y(9), y(10), y(10)-98, y(10)++, y(11)-98, y(12), y(12)-98, y(12)-98++, y(13)-98++, y(13)++

**Precursor origin neutral loss:** +

## Peptide No.141

**DMSPSAETEAPLAK**

**Confirmed sites:** @S:3

**Ambiguous sites:**

**MS/MS Fragmentation of DMSPSAETEAPLAK**

Found in **MAP4\_MOUSE**, Microtubule-associated protein 4 OS=Mus musculus GN=Map4 PE=1 SV=3

Match to Query 2470: 1609.757806 from(805.886179,2+)

Title: Elution from: 32.930 to 32.930 scan no 2500 cid35.00 polarity:+:MA10

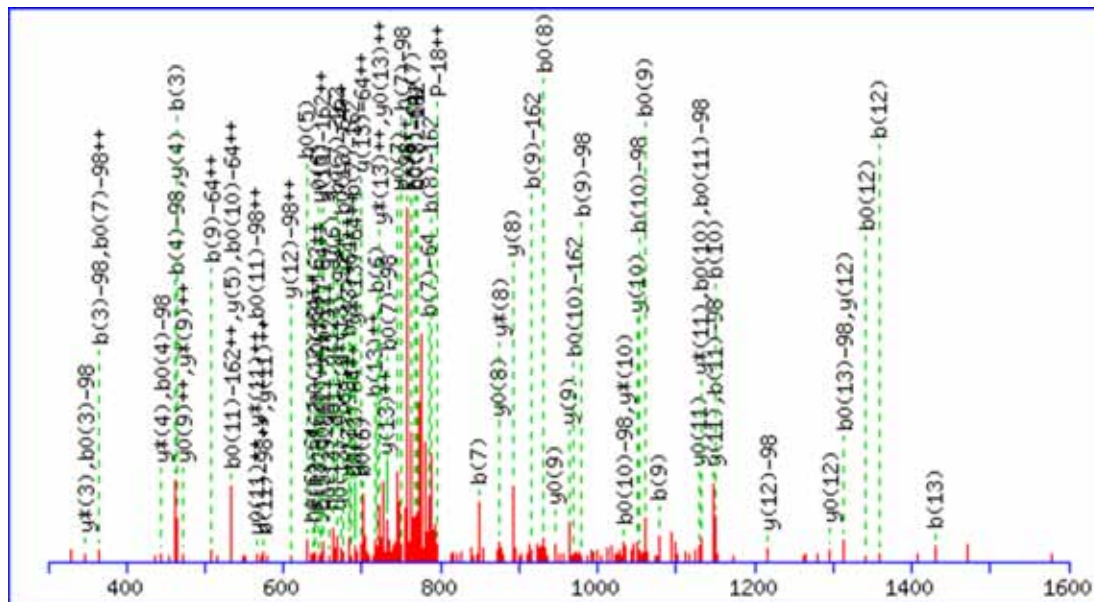

**Monoisotopic mass of neutral peptide Mr(calc): 1609.7582**

**Fixed modifications:** Carbamidomethyl (C) (apply to specified residues or termini only)

**Variable modifications:**

**N-term :** Dimethyl:2H(4)13C(2) (N-term)

**M2 :** Oxidation (M), with neutral losses 0.0000(shown in table), 63.9983

**S3 :** Phospho (ST), with neutral losses 0.0000(shown in table), 97.9769

**K14 :** Dimethyl:2H(4)13C(2) (K)

**Ions Score:** 61 **Expect:** 3.3e-005

**Matched b ions:** b(3)-98, b(3), b(4)-98, b(5), b(6), b(7), b(7)-98, b(9), b(9)-98, b(10), b(10)-98, b(11)-98, b(11)-98++, b(12), b(13), b(13)++

**Matched y ions:** y(4), y(5), y(6), y(7), y(8), y(9), y(10), y(11), y(11)++, y(12), y(12)-98, y(12)-98++, y(12)++, y(13)-98++, y(13)++

**Precursor origin neutral loss:** +

## Peptide No.142

**DQEAPSPEALPSPGQESPDGSPR**

**Confirmed sites:** @S:17

**Ambiguous sites:**

**MS/MS Fragmentation of DQEAPSPEALPSPGQESPDGSPR**

Found in **SPEG\_MOUSE**, Striated muscle-specific serine/threonine-protein kinase OS=Mus musculus  
GN=Speg PE=1 SV=2

Match to Query 6877: 2552.109636 from(851.710488,3+)

Title: Elution from: 42.102 to 42.102 scan no 3787 cid35.00 polarity:+:MA10:m1s

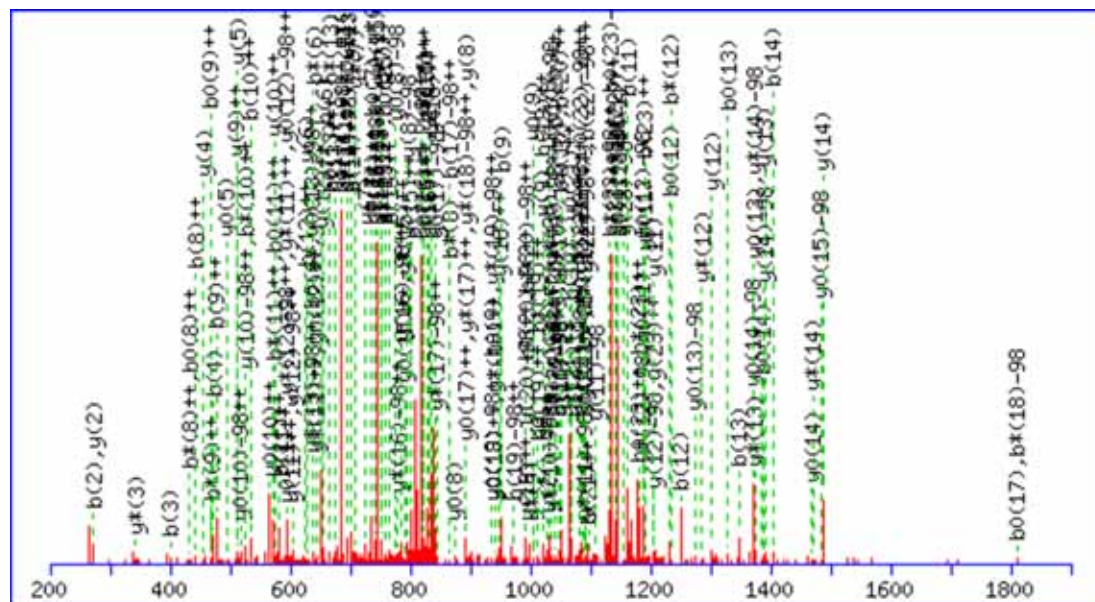

**Monoisotopic mass of neutral peptide Mr(calc):** 2552.1068

**Fixed modifications:** Carbamidomethyl (C) (apply to specified residues or termini only)

**Variable modifications:**

**N-term :** Dimethyl (N-term)

**S17 :** Phospho (ST), with neutral losses 0.0000(shown in table), 97.9769

**Ions Score:** 42 **Expect:** 0.0045

**Matched b ions:** b(2), b(3), b(4), b(6), b(7), b(8)++, b(9), b(9)++, b(10), b(10)++, b(11)++, b(11), b(12), b(12)++, b(13), b(13)++, b(14)++, b(14), b(15)++, b(16)++, b(17)-98++, b(19)++, b(19)-98++, b(20)++, b(21)-98++, b(21)++, b(22)-98++, b(22)++, b(23)-98++, b(23)++

**Matched y ions:** y(2), y(4), y(5), y(6), y(7), y(8), y(8)-98, y(9), y(9)++, y(10)-98++, y(10)-98, y(10)++, y(11)++, y(11), y(11)-98, y(12)++, y(12), y(12)-98++, y(12)-98, y(13), y(13)++, y(14), y(14)++, y(14)-98, y(14)-98++, y(15)-98++, y(15)++, y(16)++, y(16)-98++, y(18)++, y(19)++, y(20)-98++, y(20)++, y(21)-98++, y(22)-98++, y(22)++, y(23)-98++, y(23)++

**Precursor origin neutral loss:** +

## Peptide No.143

**DQEAPSPEALPSPGQESPDGSPR**

**Confirmed sites:** @S:22

**Ambiguous sites:**

MS/MS Fragmentation of **DQEAPSPEALPSPGQESPDGSPR**

Found in **SPEG\_MOUSE**, Striated muscle-specific serine/threonine-protein kinase OS=Mus musculus  
GN=Speg PE=1 SV=2

Match to Query 6201: 2552.110101 from(851.710643,3+)

Title: Elution from: 42.140 to 42.140 scan no 3640 cid35.00 polarity:+:MA10:m1s



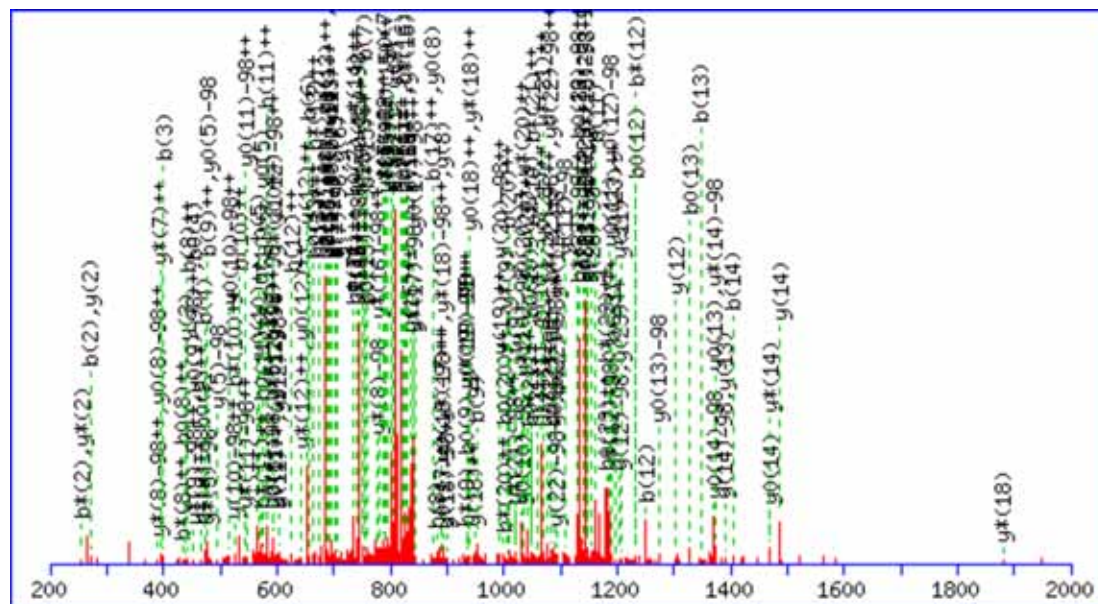

**Monoisotopic mass of neutral peptide Mr(calc): 2552.1068**

**Fixed modifications:** Carbamidomethyl (C) (apply to specified residues or termini only)

**Variable modifications:**

**N-term :** Dimethyl (N-term)

**S22 :** Phospho (ST), with neutral losses 0.0000(shown in table), 97.9769

**Ions Score:** 40 **Expect:** 0.0078

**Matched b ions:** b(2), b(3), b(4), b(5), b(6), b(7), b(8)++, b(8), b(9), b(9)++, b(10)++, b(10), b(11)++, b(11), b(12), b(12)++, b(13)++, b(13), b(14), b(14)++, b(16)++, b(17)++, b(20)++, b(21)++, b(22)-98++, b(22)++, b(23)-98++, b(23)++

**Matched y ions:** y(2), y(3), y(5)-98, y(5), y(6), y(7)-98, y(7), y(8), y(8)-98, y(9), y(10)-98++, y(10)++, y(11)++, y(11)-98, y(11), y(12)++, y(12), y(12)-98++, y(12)-98, y(13)++, y(13), y(14), y(14)++, y(14)-98++, y(14)-98, y(15)-98++, y(15)++, y(16)++, y(16)-98++, y(18)++, y(18)-98++, y(19)++, y(20)++, y(20)-98++, y(21)++, y(22)-98++, y(22)++, y(23)-98++, y(23)++

**Precursor origin neutral loss:** +

## Peptide No.144

**DQQPSGSEGEDDDAEALKK**

**Confirmed sites:** @S:5,@S:7

**Ambiguous sites:**

MS/MS Fragmentation of **DQQPSGSEGEDDDAEALKK**

Found in **THUM1\_MOUSE**, THUMP domain-containing protein 1 OS=Mus musculus GN=Thumpd1 PE=1 SV=1

Match to Query 7139: 2332.936521 from(778.652783,3+)

Title: Elution from: 36.118 to 36.118 scan no 3141 cid35.00 polarity:+:MA10:m1s

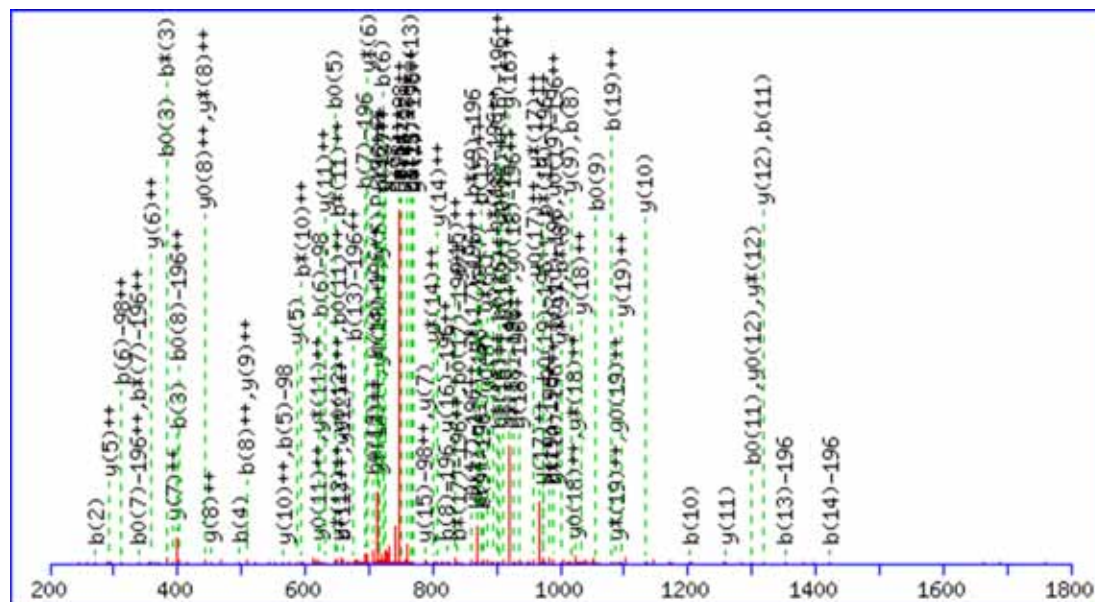

**Monoisotopic mass of neutral peptide Mr(calc):** 2332.9349

**Fixed modifications:** Carbamidomethyl (C) (apply to specified residues or termini only)

**Variable modifications:**

**N-term :** Dimethyl (N-term)

**S5 :** Phospho (ST), with neutral losses 97.9769(shown in table), 0.0000

**S7 :** Phospho (ST), with neutral losses 97.9769(shown in table), 0.0000

**K19 :** Dimethyl (K)

**K20 :** Dimethyl (K)

**Ions Score:** 40 **Expect:** 0.0039

**Matched b ions:** b(2), b(3), b(4), b(5)-98, b(6)-98, b(6)-98++, b(6), b(7)-196, b(7)-98, b(8)-98, b(8)++, b(8)-196, b(8), b(9)-196, b(10), b(11), b(11)++, b(12)++, b(13)-196, b(13)-98++, b(13)-196++, b(14)-196, b(14)-98++, b(14)-196++, b(15)-98++, b(15)++, b(16)++, b(16)-98++, b(17)-98++, b(18)-196++, b(19)-196++, b(19)++, b(19)-98++

**Matched y ions:** y(5)++, y(5), y(6)++, y(6), y(7)++, y(7), y(8)++, y(8), y(9)++, y(9), y(10)++, y(10), y(11)++, y(11), y(12), y(12)++, y(13)++, y(14)-98++, y(14)++, y(15)++, y(15)-98++, y(16)++, y(16)-98++, y(16)-196++, y(17)-98++, y(17)++, y(17)-196++, y(18)-98++, y(18)-196++, y(18)++, y(19)-98++, y(19)++

**Precursor origin neutral loss:** +

## Peptide No.145

**DRASPAAEEAVPEWASCLK**

**Confirmed sites:** @S:4

**Ambiguous sites:**

MS/MS Fragmentation of **DRASPAAEEAVPEWASCLK**

Found in **SYNPO\_MOUSE**, Synaptopodin OS=Mus musculus GN=Synpo PE=1 SV=2

Match to Query 7030: 2293.046700 from(765.356176,3+)

Title: Elution from: 56.169 to 56.169 scan no 5567 cid35.00 polarity:+:MA10:m1s

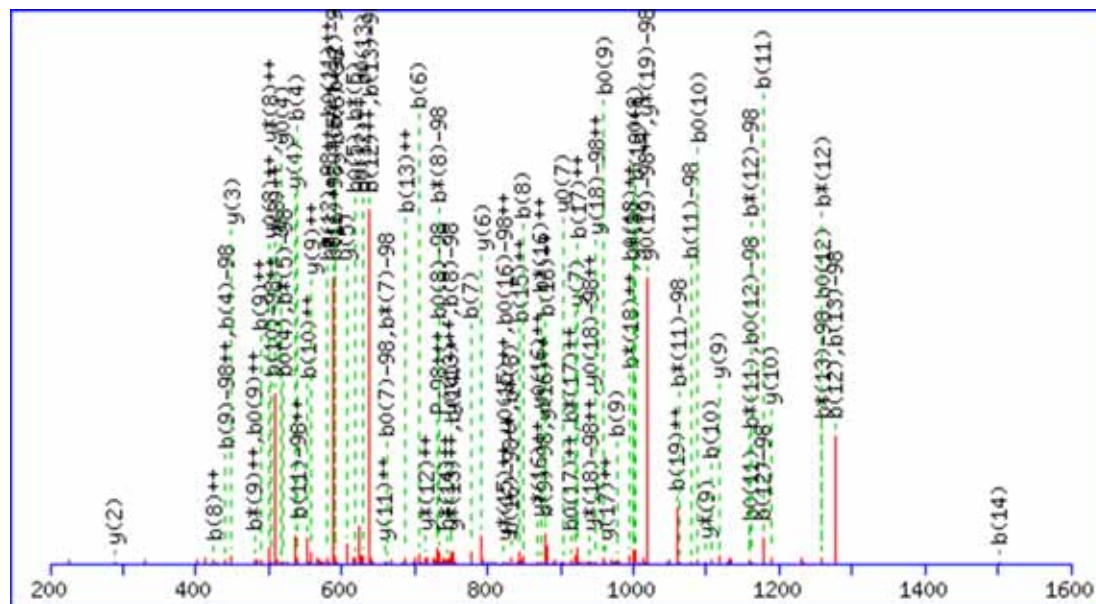

**Monoisotopic mass of neutral peptide Mr(calc):** 2293.0449

**Fixed modifications:** Carbamidomethyl (C) (apply to specified residues or termini only)

**Variable modifications:**

**N-term :** Dimethyl (N-term)

**S4 :** Phospho (ST), with neutral losses 0.0000(shown in table), 97.9769

**K20 :** Dimethyl (K)

**Ions Score:** 73 **Expect:** 3.2e-006

**Matched b ions:** b(4)-98, b(4), b(6), b(7), b(8)++, b(8), b(8)-98, b(9)++, b(9)-98++, b(9), b(9)-98, b(10), b(10)++, b(10)-98++, b(11)++, b(11), b(11)-98, b(11)-98++, b(12)-98++, b(12)++, b(12), b(12)-98, b(13)-98++, b(13)-98, b(13)++, b(14), b(14)++, b(15)++, b(16)++, b(16)-98++, b(17)++, b(18)++, b(19)++

**Matched y ions:** y(2), y(3), y(4), y(5), y(6), y(7), y(8)++, y(8), y(9), y(9)++, y(10), y(11)++, y(16)++, y(17)++, y(18)-98++

**Precursor origin neutral loss:**

## Peptide No.146

**DRASPAAEEAVPEWASCLK**

**Confirmed sites:** @S:4

**Ambiguous sites:**

MS/MS Fragmentation of **DRASPAAEEAVPEWASCLK**

Found in **SYNPO\_MOUSE**, Synaptopodin OS=Mus musculus GN=Synpo PE=1 SV=2

Match to Query 7661: 2305.109436 from(769.377088,3+)

Title: Elution from: 56.209 to 56.209 scan no 5619 cid35.00 polarity:+:MA10:m1s

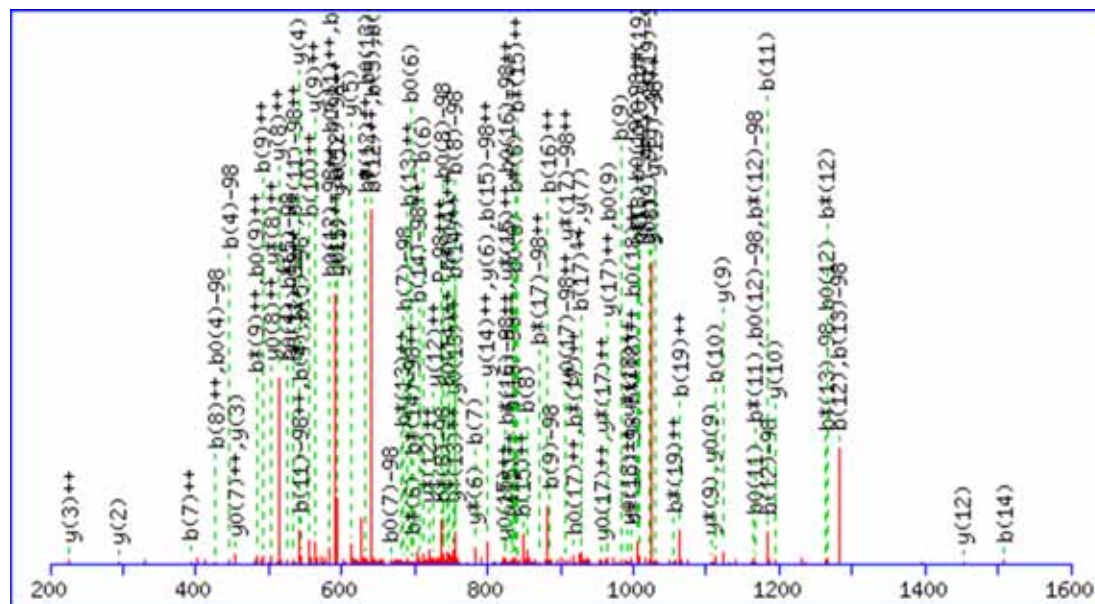

**Monoisotopic mass of neutral peptide Mr(calc):** 2305.1086

**Fixed modifications:** Carbamidomethyl (C) (apply to specified residues or termini only)

**Variable modifications:**

**N-term :** Dimethyl:2H(4)13C(2) (N-term)

**S4 :** Phospho (ST), with neutral losses 0.0000(shown in table), 97.9769

**K20 :** Dimethyl:2H(4)13C(2) (K)

**Ions Score:** 78 **Expect:** 1.2e-006

**Matched b ions:** b(4)-98, b(4), b(5), b(5)-98, b(6), b(7)++, b(7), b(7)-98, b(8), b(8)-98, b(8)++, b(9)++, b(9)-98, b(9), b(10)++, b(10), b(11)++, b(11), b(11)-98++, b(12)-98++, b(12)++, b(12), b(12)-98, b(13)-98++, b(13)-98, b(13)++, b(14), b(14)++, b(14)-98++, b(15)++, b(15)-98++, b(16)++, b(16)-98++, b(17)++, b(18)++, b(19)++

**Matched y ions:** y(2), y(3)++, y(3), y(4), y(5), y(6), y(7), y(8)++, y(8), y(9), y(9)++, y(10), y(12), y(12)++, y(14)++, y(15)++, y(17)++, y(19)-98++

**Precursor origin neutral loss:**

## Peptide No.147

**DSALQDTDDSDDDPVLIPGAR**

**Confirmed sites:** @S:2,@S:10

**Ambiguous sites:**

MS/MS Fragmentation of **DSALQDTDDSDDDPVLIPGAR**

Found in **DCAF6\_MOUSE**, DDB1- and CUL4-associated factor 6 OS=Mus musculus GN=Dcaf6 PE=1 SV=1

Match to Query 7280: 2401.958529 from(801.660119,3+)

Title: Elution from: 59.847 to 59.847 scan no 5928 cid35.00 polarity:+:MA10:m1s





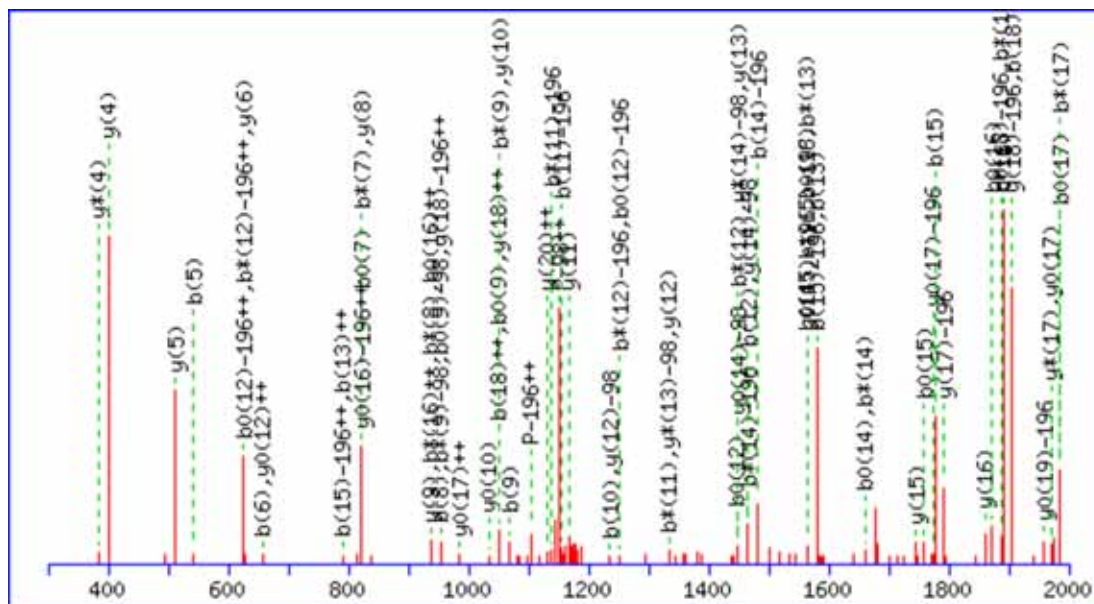

Monoisotopic mass of neutral peptide Mr(calc): 2401.9564

Fixed modifications: Carbamidomethyl (C) (apply to specified residues or termini only)

Variable modifications:

N-term : Dimethyl (N-term)

T7 : Phospho (ST), with neutral losses 97.9769(shown in table), 0.0000

S10 : Phospho (ST), with neutral losses 97.9769(shown in table), 0.0000

Ions Score: 60 Expect: 3.1e-005

Matched b ions: b(5), b(6), b(8), b(9), b(10), b(10)-98, b(11)-98++, b(11)-98, b(11)-196, b(12), b(13)-98, b(13), b(13)++, b(14)-196, b(14)-98, b(14)-98++, b(15)-196, b(15)-98, b(15), b(15)-196++, b(16)-98, b(16), b(17)-98++, b(17)-98, b(18)++, b(18)-196

Matched y ions: y(4), y(5), y(6), y(8), y(9), y(10), y(11), y(12), y(12)-98, y(13), y(14)-98, y(14), y(15), y(16), y(17)-196, y(17)-98, y(18)++, y(18)-196++, y(18)-196, y(20)++

Precursor origin neutral loss: +

## Peptide No.149

**DSALQDTDDSDDDPVLIPGAR**

Confirmed sites: @S:2,@S:10

Ambiguous sites:

MS/MS Fragmentation of **DSALQDTDDSDDDPVLIPGAR**

Found in **DCAF6\_MOUSE**, DDB1- and CUL4-associated factor 6 OS=Mus musculus GN=Dcaf6 PE=1 SV=1

Match to Query 5797: 2407.990002 from(1205.002277,2+)

Title: Elution from: 59.824 to 59.824 scan no 5558 cid35.00 polarity:+:MA10:m1s



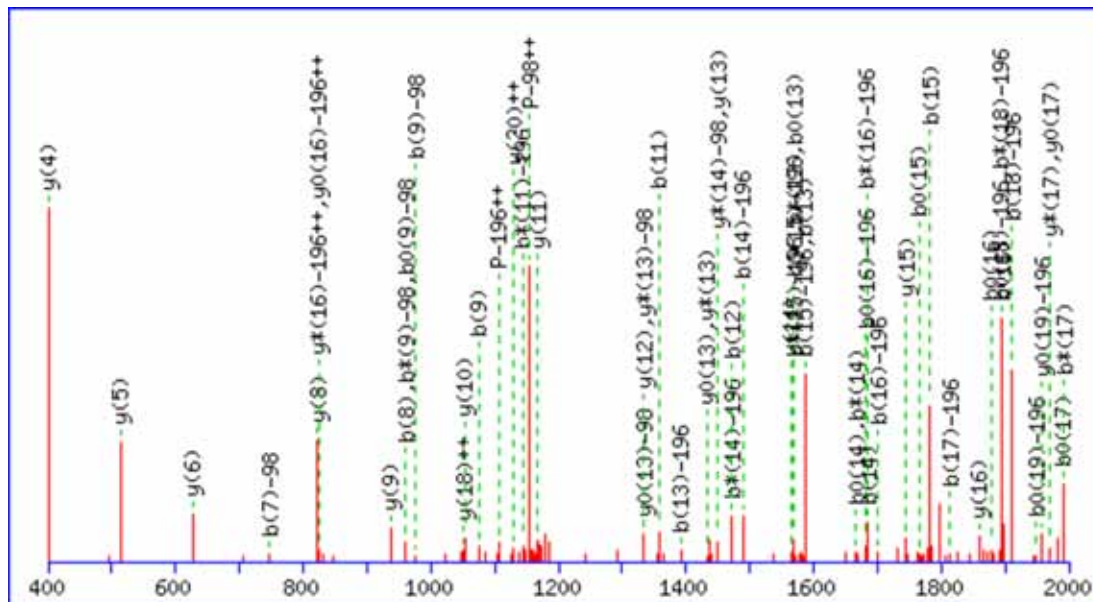

**Monoisotopic mass of neutral peptide Mr(calc):** 2407.9882

**Fixed modifications:** Carbamidomethyl (C) (apply to specified residues or termini only)

**Variable modifications:**

**N-term :** Dimethyl:2H(4)13C(2) (N-term)

**T7 :** Phospho (ST), with neutral losses 0.0000(shown in table), 97.9769

**S10 :** Phospho (ST), with neutral losses 0.0000(shown in table), 97.9769

**Ions Score:** 63 **Expect:** 2.6e-005

**Matched b ions:** b(7)-98, b(8), b(9), b(9)-98, b(10)-98, b(11), b(12), b(13), b(13)-98, b(13)-196, b(14)-98, b(14), b(14)-196, b(15)-196, b(15)-98, b(15), b(16), b(16)-98, b(16)-196, b(17)-98, b(17)-196, b(18)-196

**Matched y ions:** y(4), y(5), y(6), y(8), y(9), y(10), y(11), y(12), y(13), y(14), y(15)-98++, y(15), y(16), y(16)-98, y(18)++, y(20)++

**Precursor origin neutral loss:** +

## Peptide No.151

**DSDQVAQSDGEESPAEEQLLGER**

**Confirmed sites:** @S:8

**Ambiguous sites:**

MS/MS Fragmentation of **DSDQVAQSDGEESPAEEQLLGER**

Found in **SC31A\_MOUSE**, Protein transport protein Sec31A OS=Mus musculus GN=Sec31a PE=1 SV=2

Match to Query 8070: 2667.118362 from(890.046730,3+)

Title: Elution from: 50.692 to 50.692 scan no 4993 cid35.00 polarity:+:MA10:m1s



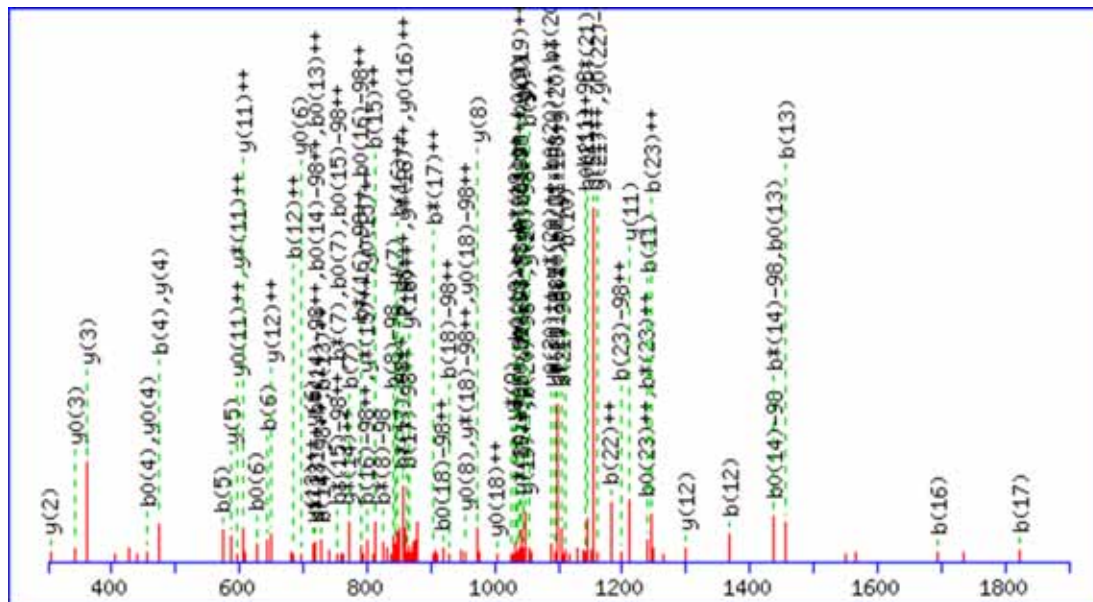

**Monoisotopic mass of neutral peptide Mr(calc):** 2667.1185

**Fixed modifications:** Carbamidomethyl (C) (apply to specified residues or termini only)

**Variable modifications:**

**N-term :** Dimethyl (N-term)

**S8 :** Phospho (ST), with neutral losses 0.0000(shown in table), 97.9769

**Ions Score:** 79 **Expect:** 7e-007

**Matched b ions:** b(4), b(5), b(6), b(7), b(8)-98, b(9), b(10), b(11), b(11)-98, b(12), b(12)++, b(13)++, b(13), b(14)-98++, b(15)++, b(16), b(16)-98++, b(16)++, b(17), b(17)-98++, b(18)-98++, b(19)++, b(20)++, b(20)-98++, b(21)++, b(21)-98++, b(22)++, b(23)++, b(23)-98++

**Matched y ions:** y(2), y(3), y(4), y(5), y(6), y(7), y(8), y(9), y(11)++, y(11), y(12)++, y(12), y(13)++, y(16)++, y(19)++, y(20)++, y(20)-98++, y(21)++

**Precursor origin neutral loss:** +

## Peptide No.152

**DSDQVAQSDGEESPAEEQLLGER**

**Confirmed sites:** @S:8,@S:13

**Ambiguous sites:**

MS/MS Fragmentation of **DSDQVAQSDGEESPAEEQLLGER**

Found in **SC31A\_MOUSE**, Protein transport protein Sec31A OS=Mus musculus GN=Sec31a PE=1 SV=2

Match to Query 8221: 2747.089476 from(916.703768,3+)

Title: Elution from: 52.945 to 52.945 scan no 5243 cid35.00 polarity:+:MA10:m1s

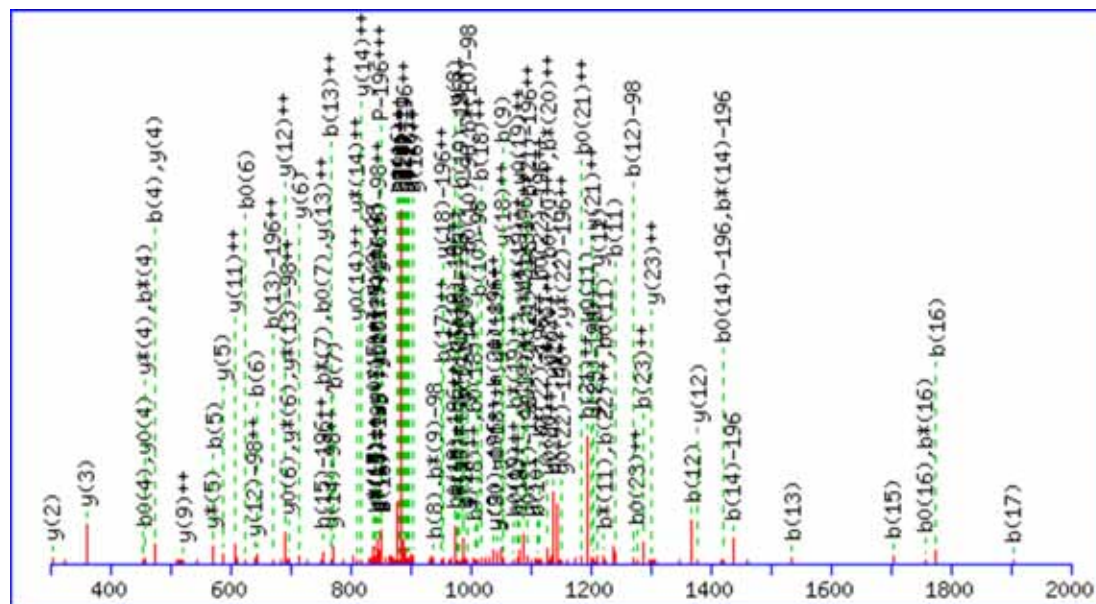

**Monoisotopic mass of neutral peptide Mr(calc):** 2747.0848

**Fixed modifications:** Carbamidomethyl (C) (apply to specified residues or termini only)

**Variable modifications:**

**N-term :** Dimethyl (N-term)

**S8 :** Phospho (ST), with neutral losses 0.0000(shown in table), 97.9769

**S13 :** Phospho (ST), with neutral losses 0.0000(shown in table), 97.9769

**Ions Score:** 66 **Expect:** 1.1e-005

**Matched b ions:** b(4), b(5), b(6), b(7), b(8), b(8)-98, b(9), b(10)-98, b(10), b(11), b(12), b(12)-98, b(13)-98, b(13), b(13)++, b(13)-196++, b(14)-196, b(14)-98, b(14)-98++, b(15), b(15)-196++, b(15)-98++, b(15)++, b(16), b(16)++, b(16)-98++, b(17), b(17)-98++, b(17)++, b(18)-98++, b(18)++, b(19)++, b(19)-196++, b(19)-98++, b(20)-98++, b(20)++, b(20)-196++, b(21)++, b(21)-98++, b(21)-196++, b(22)++, b(22)-98++, b(23)++, b(23)-98++

**Matched y ions:** y(2), y(3), y(4), y(5), y(6), y(7), y(8), y(9), y(9)++, y(11)++, y(11), y(12)++, y(12), y(12)-98++, y(13)++, y(14)-98++, y(14)++, y(15)++, y(16)++, y(17)++, y(17)-196++, y(17)-98++, y(18)++, y(18)-98++, y(18)-196++, y(19)++, y(19)-196++, y(19)-98++, y(20)-98++, y(20)++, y(20)-196++, y(21)++, y(21)-98++, y(22)-98++, y(23)-196++, y(23)++

**Precursor origin neutral loss:** +

## Peptide No.153

**DSGSEDFLMEDDDSDYGSSK**

**Confirmed sites:** @S:4,@S:16

**Ambiguous sites:**

MS/MS Fragmentation of **DSGSEDFLMEDDDSDYGSSK**

Found in **NUCKS\_MOUSE**, Nuclear ubiquitous casein and cyclin-dependent kinases substrate OS=Mus musculus GN=Nucks1 PE=1 SV=1

Match to Query 8035: 2659.858810 from(1330.936681,2+)

Title: Elution from: 53.153 to 53.153 scan no 5262 cid35.00 polarity:+:MA10:m1s



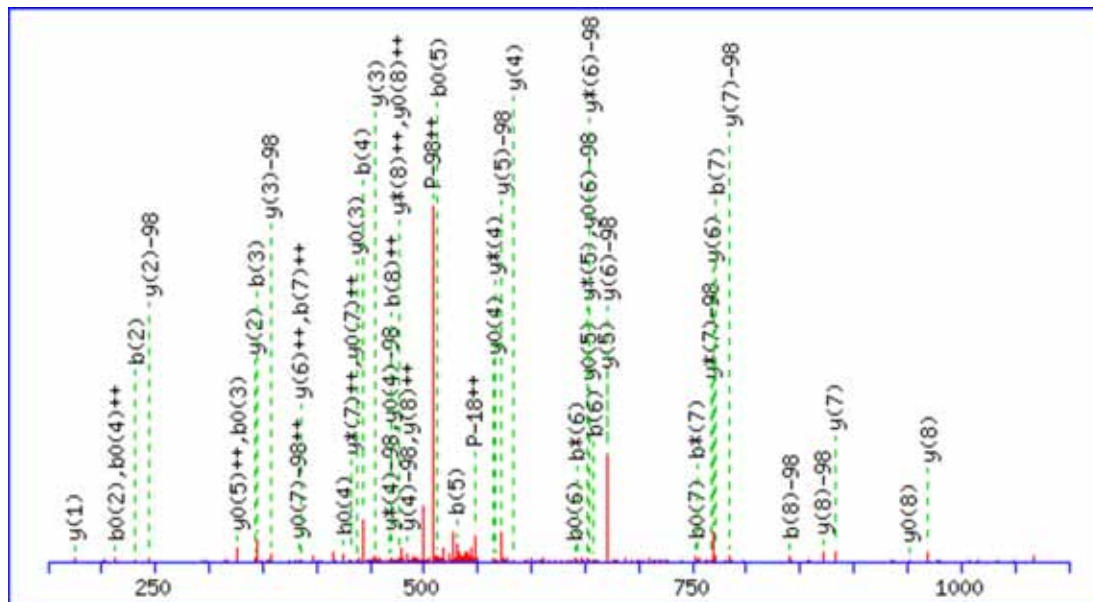

**Monoisotopic mass of neutral peptide Mr(calc):** 1111.5274

**Fixed modifications:** Carbamidomethyl (C) (apply to specified residues or termini only)

**Variable modifications:**

**N-term :** Dimethyl (N-term)

**S8 :** Phospho (ST), with neutral losses 97.9769(shown in table), 0.0000

**Ions Score:** 52 **Expect:** 0.00015

**Matched b ions:** b(2), b(3), b(4), b(5), b(6), b(7), b(7)++, b(8)-98, b(8)++

**Matched y ions:** y(1), y(2)-98, y(2), y(3)-98, y(3), y(4)-98, y(4), y(5), y(5)-98, y(6), y(6)-98, y(6)++, y(7)-98, y(7), y(8)-98, y(8), y(8)++

**Precursor origin neutral loss:** +

## Peptide No.155

**DSLVSQLSR**

**Confirmed sites:** @S:8

**Ambiguous sites:**

**MS/MS Fragmentation of DSLVSQLSR**

Found in **MYH1\_MOUSE**, Myosin-1 OS=Mus musculus GN=Myh1 PE=1 SV=1

Match to Query 542: 1117.559784 from(559.787168,2+)

Title: Elution from: 38.918 to 38.918 scan no 3216 cid35.00 polarity:+:MA10



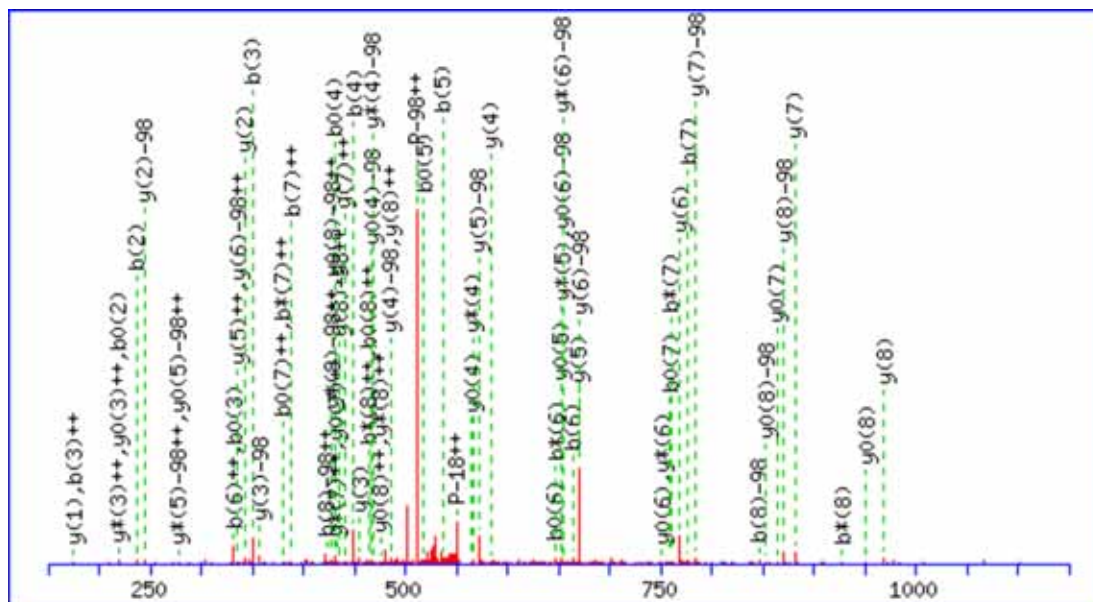

**Monoisotopic mass of neutral peptide Mr(calc):** 1117.5593

**Fixed modifications:** Carbamidomethyl (C) (apply to specified residues or termini only)

**Variable modifications:**

**N-term :** Dimethyl:2H(4)13C(2) (N-term)

**S8 :** Phospho (ST), with neutral losses 97.9769(shown in table), 0.0000

**Ions Score:** 48 **Expect:** 0.00051

**Matched b ions:** b(2), b(3), b(3)++, b(4), b(5), b(6)++, b(6), b(7), b(7)++, b(8)-98, b(8)-98++

**Matched y ions:** y(1), y(2)-98, y(2), y(3)-98, y(3), y(4)-98, y(4), y(5), y(5)-98, y(5)++, y(6), y(6)-98, y(6)-98++, y(7), y(7)-98, y(7)++, y(8)-98, y(8), y(8)-98++, y(8)++

**Precursor origin neutral loss:** +

## Peptide No.156

**DSPLMSTPVANDSR**

**Confirmed sites:** @S:2,@S:6,@T:7

**Ambiguous sites:**

**MS/MS Fragmentation of DSPLMSTPVANDSR**

Found in **TMM71\_MOUSE**, Transmembrane protein 71 OS=Mus musculus GN=Tmem71 PE=2 SV=1

Match to Query 3582: 1778.646003 from(593.889277,3+)

Title: Elution from: 29.719 to 29.719 scan no 2106 cid35.00 polarity:+:MA10:m1s

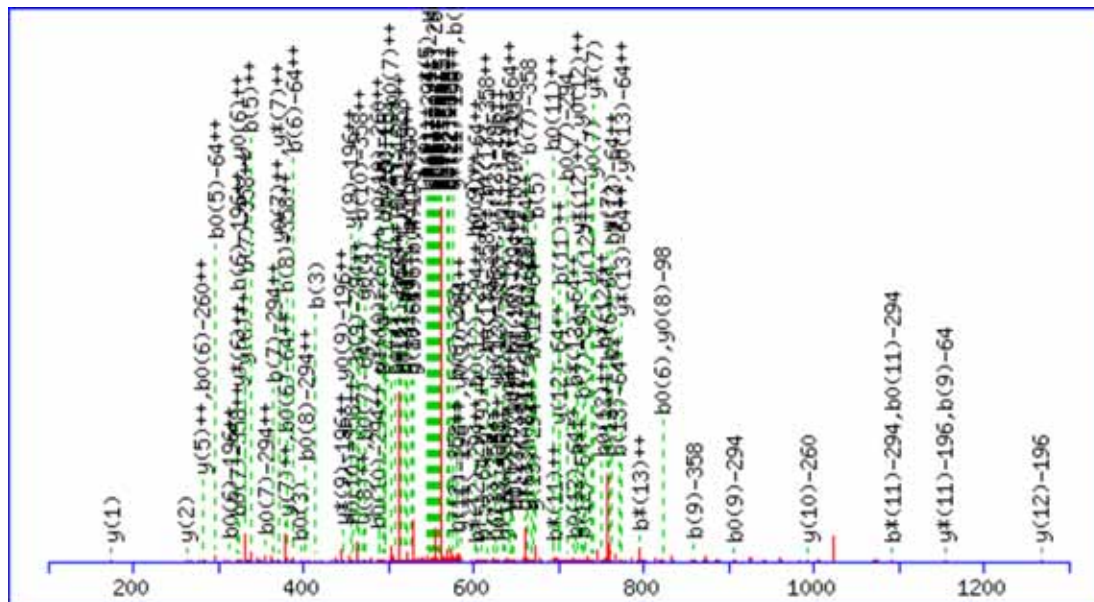

**Monoisotopic mass of neutral peptide Mr(calc): 1778.6449**

**Fixed modifications:** Carbamidomethyl (C) (apply to specified residues or termini only)

**Variable modifications:**

**N-term :** Dimethyl:2H(4)13C(2) (N-term)

**S2 :** Phospho (ST), with neutral losses 97.9769(shown in table), 0.0000

**M5 :** Oxidation (M), with neutral losses 0.0000(shown in table), 63.9983

**S6 :** Phospho (ST), with neutral losses 97.9769(shown in table), 0.0000

**T7 :** Phospho (ST), with neutral losses 97.9769(shown in table), 0.0000

**Ions Score: 23 Expect: 0.052**

**Matched b ions:** b(3), b(4), b(5)++, b(5), b(5)-98, b(6)-196++, b(7)-98++, b(7)++, b(7)-294++, b(7)-294, b(8)-98++, b(8)++, b(9)-294++, b(9)-196++, b(9)++, b(10)-196++, b(10)++, b(11)-294++, b(11)-196++, b(11)-98++, b(11)++, b(12)++, b(12)-196++, b(12)-98++, b(13)-98++, b(13)-196++

**Matched y ions:** y(1), y(2), y(5), y(5)++, y(6)++, y(6), y(7)++, y(7), y(8)++, y(9)-196++, y(9)-98++, y(9)++, y(10)-196++, y(10)-98++, y(11)-196++, y(11)-98++, y(12)-196, y(12)-196++, y(12)++, y(13)-98++, y(13)-294++, y(13)-196++

**Precursor origin neutral loss: +**

## Peptide No.157

**DVYLSPR**

**Confirmed sites: @S:5**

**Ambiguous sites:**

**MS/MS Fragmentation of DVYLSPR**

Found in **HNRPG\_MOUSE**, Heterogeneous nuclear ribonucleoprotein G OS=Mus musculus GN=Rbmx PE=1 SV=1

Match to Query 368: 956.436066 from(479.225309,2+)

Title: Elution from: 34.627 to 34.627 scan no 2937 cid35.00 polarity:+:MA10

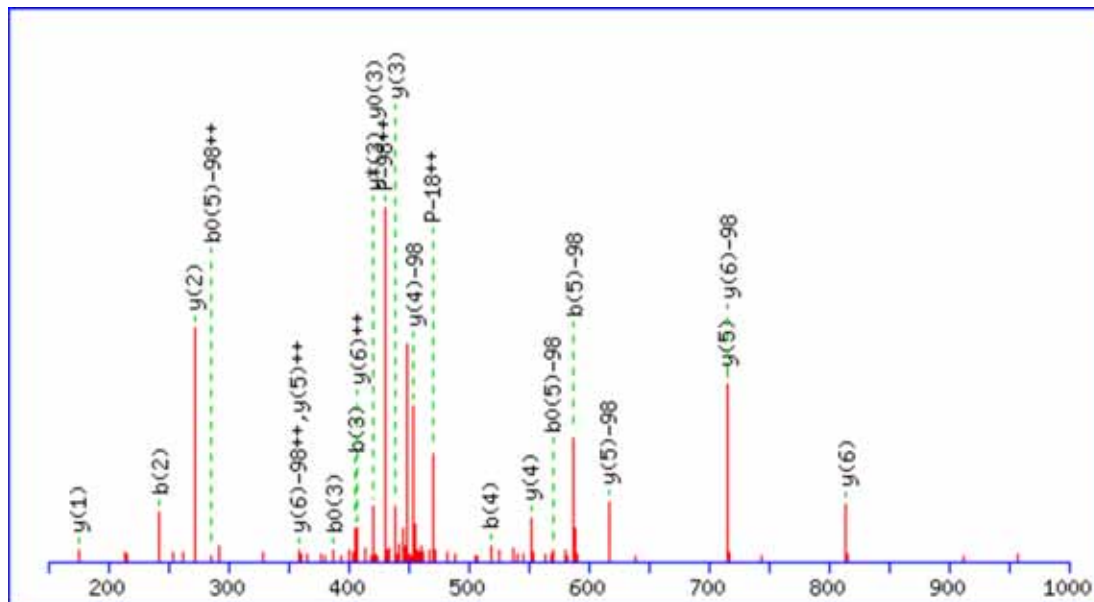

**Monoisotopic mass of neutral peptide Mr(calc):** 956.4368

**Fixed modifications:** Carbamidomethyl (C) (apply to specified residues or termini only)

**Variable modifications:**

**N-term :** Dimethyl (N-term)

**S5 :** Phospho (ST), with neutral losses 97.9769(shown in table), 0.0000

**Ions Score:** 25 **Expect:** 0.043

**Matched b ions:** b(2), b(3), b(4), b(5)-98

**Matched y ions:** y(1), y(2), y(3), y(4), y(4)-98, y(5), y(5)++, y(5)-98, y(6), y(6)-98++, y(6)-98, y(6)++

**Precursor origin neutral loss:** +

## Peptide No.158

**DWEDDSDEDMSNFDR**

**Confirmed sites:** @S:6

**Ambiguous sites:**

**MS/MS Fragmentation of DWEDDSDEDMSNFDR**

Found in **TEBP\_MOUSE**, Prostaglandin E synthase 3 OS=Mus musculus GN=Ptges3 PE=1 SV=1

Match to Query 5577: 1998.646292 from(1000.330422,2+)

Title: Elution from: 43.452 to 43.452 scan no 4111 cid35.00 polarity:+:MA10

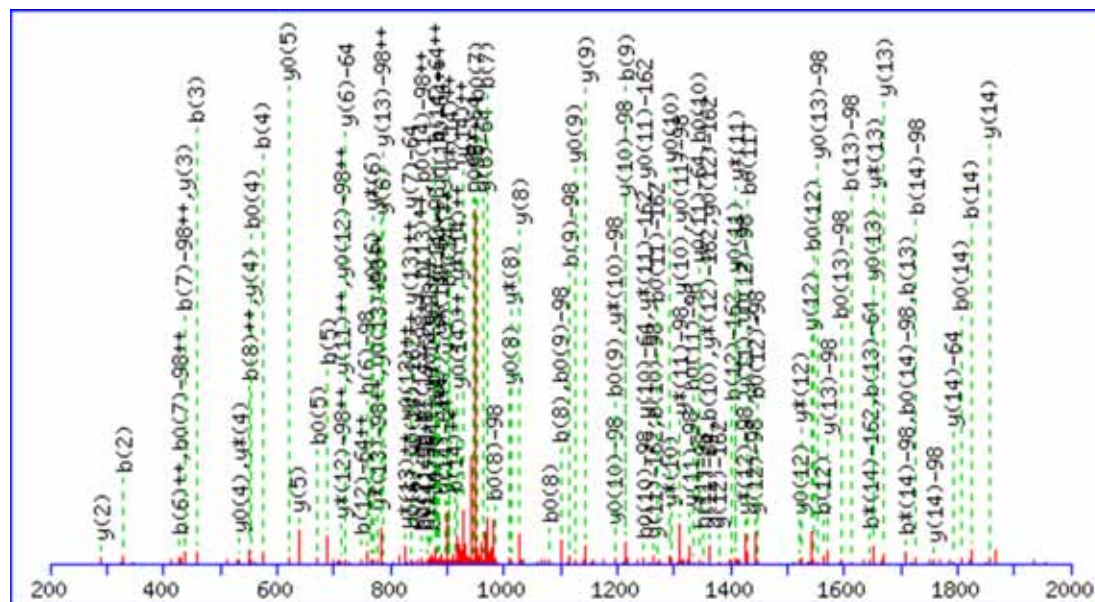

**Monoisotopic mass of neutral peptide Mr(calc):** 1998.6463

**Fixed modifications:** Carbamidomethyl (C) (apply to specified residues or termini only)

**Variable modifications:**

**N-term :** Dimethyl (N-term)

**S6 :** Phospho (ST), with neutral losses 97.9769(shown in table), 0.0000

**M10 :** Oxidation (M), with neutral losses 0.0000(shown in table), 63.9983

**Ions Score:** 84 **Expect:** 1.9e-008

**Matched b ions:** b(2), b(3), b(4), b(5), b(6)-98, b(6)+, b(7)-98+, b(7)-98, b(7), b(8)+, b(8), b(9), b(9)-98, b(10), b(10)-98, b(11)-98, b(12), b(13), b(13)+, b(13)-98, b(14), b(14)-98, b(14)-98+, b(14)+

**Matched y ions:** y(2), y(3), y(4), y(5), y(6), y(7), y(8), y(9), y(10), y(10)-98, y(11), y(11)-98, y(11)+, y(12)-98, y(12), y(13)-98, y(13), y(13)-98+, y(13)+, y(14)-98+, y(14)+, y(14)-98, y(14)

**Precursor origin neutral loss:** +

## Peptide No.159

DWEDDSDEDMSNFDR

Confirmed sites: @S:6

Ambiguous sites:

MS/MS Fragmentation of **DWEDDSDEDMSNFDR**

Found in **TEBP\_MOUSE**, Prostaglandin E synthase 3 OS=Mus musculus GN=Ptges3 PE=1 SV=1

Match to Query 6422: 1982.650324 from(992.332438,2+)

Title: Elution from: 51.660 to 51.660 scan no 5157 cid35.00 polarity:+:MA10





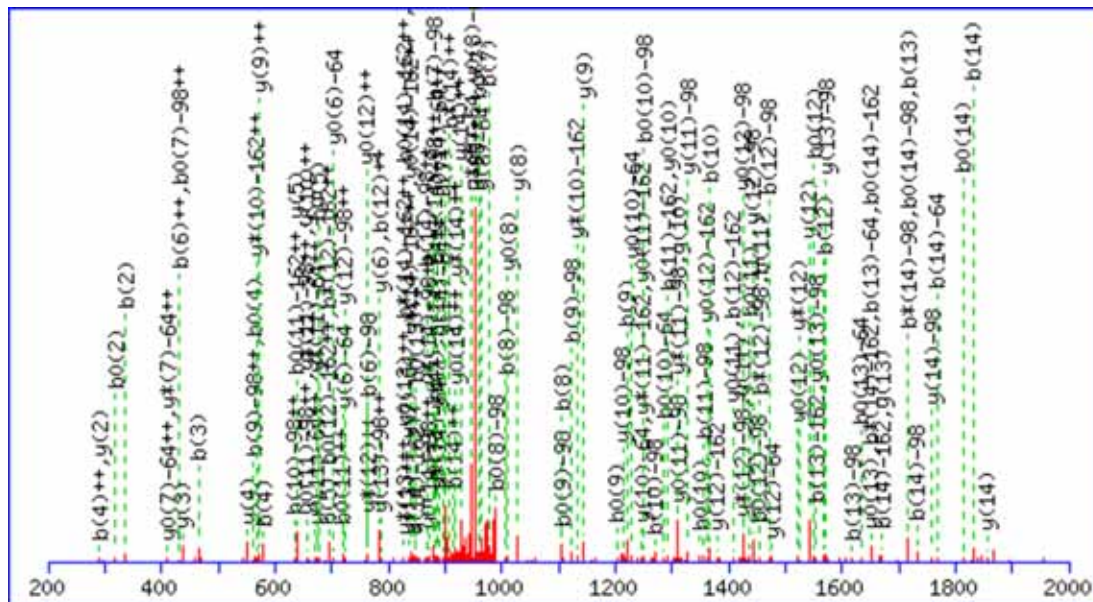

**Monoisotopic mass of neutral peptide Mr(calc):** 2004.6781

**Fixed modifications:** Carbamidomethyl (C) (apply to specified residues or termini only)

**Variable modifications:**

**N-term :** Dimethyl:2H(4)13C(2) (N-term)

**S6 :** Phospho (ST), with neutral losses 97.9769(shown in table), 0.0000

**M10 :** Oxidation (M), with neutral losses 0.0000(shown in table), 63.9983

**Ions Score:** 88 **Expect:** 1.2e-008

**Matched b ions:** b(2), b(3), b(4)++, b(4), b(5), b(6)-98, b(6)++, b(7)-98, b(7), b(8), b(8)-98, b(9), b(9)-98, b(9)-98++, b(10)-98, b(10), b(10)-98++, b(11)-98, b(11), b(12)++, b(12), b(12)-98, b(13), b(13)-98, b(14), b(14)-98, b(14)-98++, b(14)++

**Matched y ions:** y(2), y(3), y(4), y(5), y(6), y(7), y(8), y(9), y(9)++, y(10), y(10)-98, y(10)++, y(11), y(11)-98, y(12), y(12)-98, y(12)-98++, y(13)-98, y(13), y(13)-98++, y(13)++, y(14)-98++, y(14)-98, y(14), y(14)++

**Precursor origin neutral loss:** +

## Peptide No.161

**DWEDDSDEDMSNFDR**

**Confirmed sites: @S:6**

**Ambiguous sites:**

MS/MS Fragmentation of **DWEDDSDEDMSNFDR**

Found in **TEBP\_MOUSE**, Prostaglandin E synthase 3 OS=Mus musculus GN=Ptges3 PE=1 SV=1

Match to Query 6441: 1988.684952 from(995.349752,2+)

Title: Elution from: 51.616 to 51.616 scan no 5151 cid35.00 polarity:+:MA10

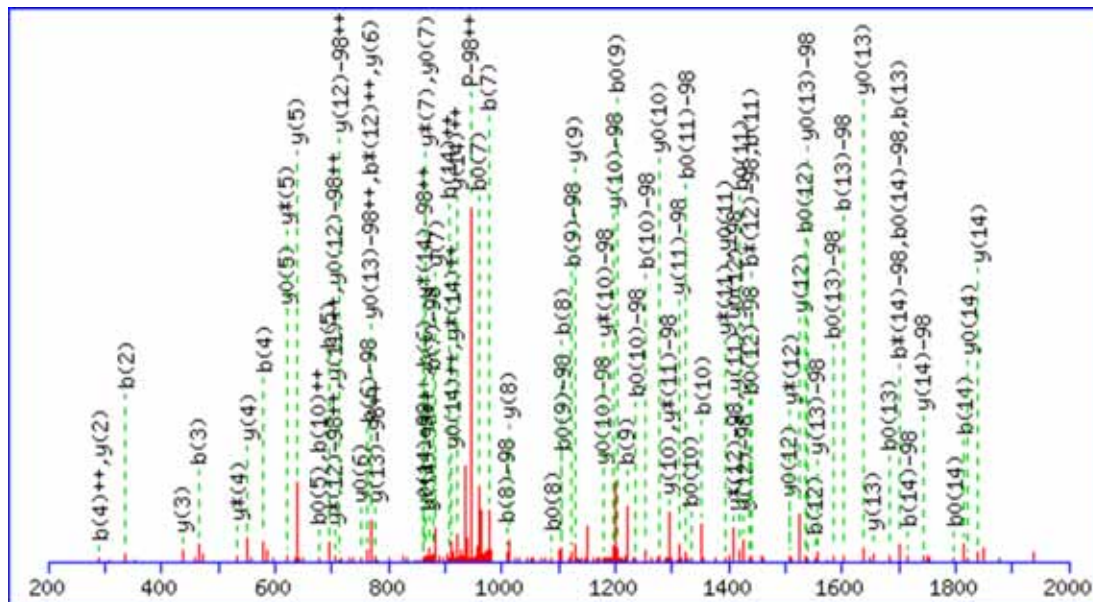

**Monoisotopic mass of neutral peptide Mr(calc):** 1988.6832

**Fixed modifications:** Carbamidomethyl (C) (apply to specified residues or termini only)

**Variable modifications:**

**N-term :** Dimethyl:2H(4)13C(2) (N-term)

**S6 :** Phospho (ST), with neutral losses 97.9769(shown in table), 0.0000

**Ions Score:** 96 **Expect:** 2e-009

**Matched b ions:** b(2), b(3), b(4)++, b(4), b(5), b(6)-98, b(6), b(7)-98, b(7), b(8)-98, b(8), b(9), b(9)-98, b(10), b(10)++, b(10)-98, b(11), b(12), b(13), b(13)-98, b(14), b(14)-98, b(14)++

**Matched y ions:** y(2), y(3), y(4), y(5), y(6), y(7), y(8), y(9), y(10), y(10)-98, y(11), y(11)-98, y(11)++, y(12), y(12)-98, y(12)-98++, y(13)-98, y(13), y(13)-98++, y(14)-98++, y(14)-98, y(14), y(14)++

**Precursor origin neutral loss:** +

## Peptide No.162

**DYESASLTEVR**

**Confirmed sites:** @S:4

**Ambiguous sites:**

MS/MS Fragmentation of **DYESASLTEVR**

Found in **ACTN2\_MOUSE**, Alpha-actinin-2 OS=Mus musculus GN=Actn2 PE=1 SV=1

Match to Query 1481: 1376.586928 from(689.300740,2+)

Title: Elution from: 40.152 to 40.152 scan no 3496 cid35.00 polarity:+:MA10

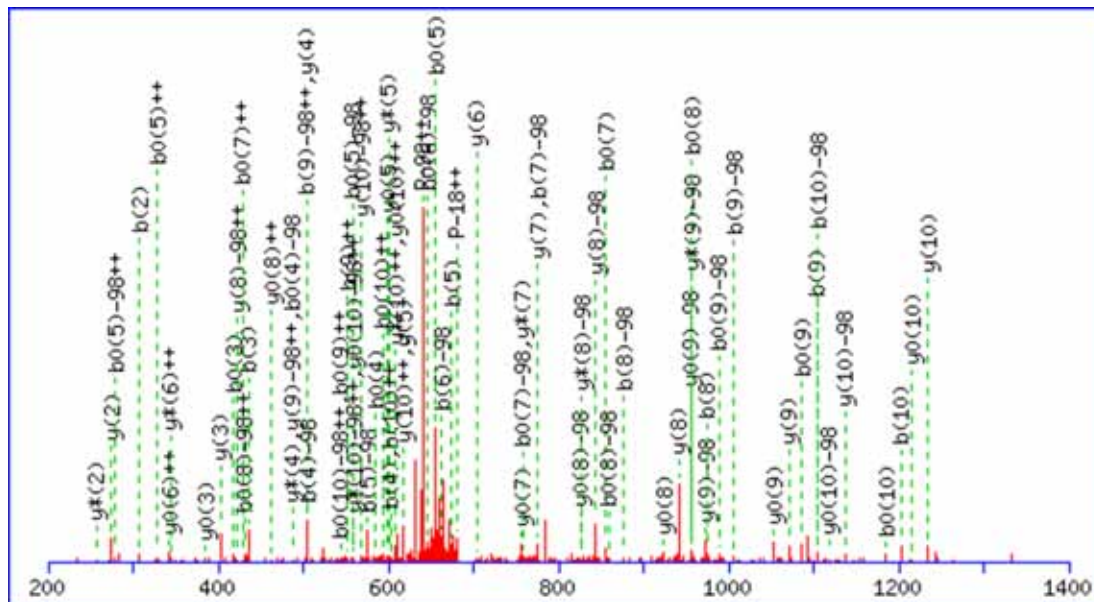

**Monoisotopic mass of neutral peptide Mr(calc):** 1376.5861

**Fixed modifications:** Carbamidomethyl (C) (apply to specified residues or termini only)

**Variable modifications:**

**N-term :** Dimethyl (N-term)

**S4 :** Phospho (ST), with neutral losses 97.9769(shown in table), 0.0000

**Ions Score:** 57 **Expect:** 5e-005

**Matched b ions:** b(2), b(3), b(4)-98, b(4), b(5)-98, b(5), b(6)-98, b(7)-98, b(8), b(8)-98, b(9)-98++, b(9), b(9)-98, b(9)++, b(10), b(10)-98, b(10)++

**Matched y ions:** y(2), y(3), y(4), y(5), y(6), y(7), y(8)-98, y(8), y(8)-98++, y(9)-98, y(9), y(9)-98++, y(10), y(10)++, y(10)-98, y(10)-98++

**Precursor origin neutral loss:** +

## Peptide No.163

**DYESASLTEVR**

**Confirmed sites:** @S:6

**Ambiguous sites:**

MS/MS Fragmentation of **DYESASLTEVR**

Found in **ACTN2\_MOUSE**, Alpha-actinin-2 OS=Mus musculus GN=Actn2 PE=1 SV=1

Match to Query 1927: 1376.587462 from(689.301007,2+)

Title: Elution from: 40.258 to 40.258 scan no 3700 cid35.00 polarity:+:MA10



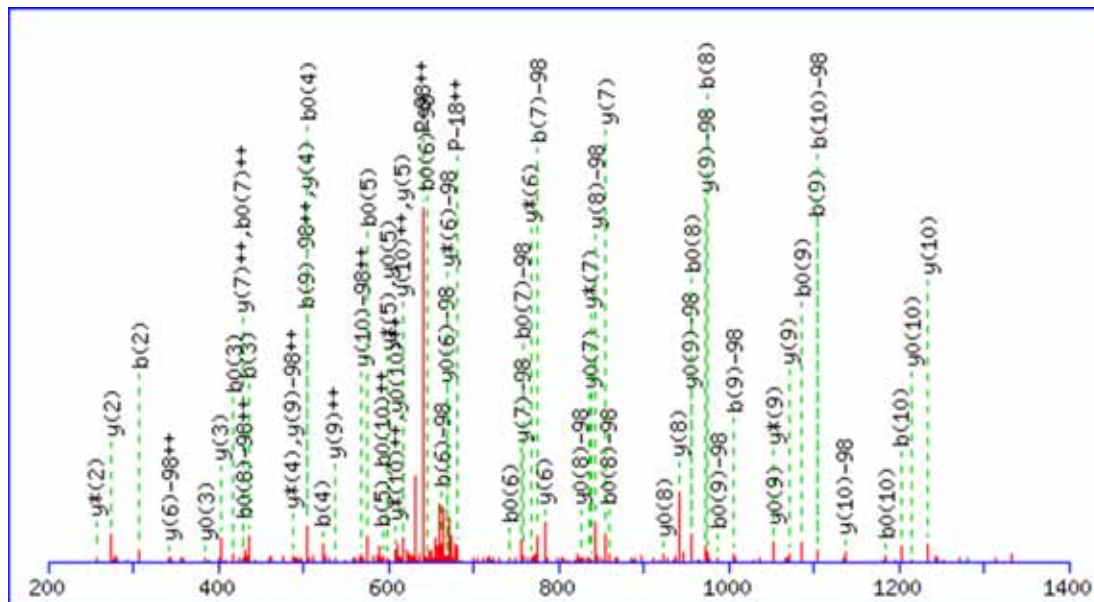

**Monoisotopic mass of neutral peptide Mr(calc):** 1376.5861

**Fixed modifications:** Carbamidomethyl (C) (apply to specified residues or termini only)

**Variable modifications:**

**N-term :** Dimethyl (N-term)

**S6 :** Phospho (ST), with neutral losses 0.0000(shown in table), 97.9769

**Ions Score:** 46 **Expect:** 0.00073

**Matched b ions:** b(2), b(3), b(4), b(5), b(6)-98, b(7)-98, b(8), b(9)-98++, b(9), b(9)-98, b(10), b(10)-98

**Matched y ions:** y(2), y(3), y(4), y(5), y(6), y(6)-98++, y(7), y(7)-98, y(7)++, y(8)-98, y(8), y(9)-98, y(9), y(9)-98++, y(9)++, y(10), y(10)-98, y(10)++, y(10)-98++

**Precursor origin neutral loss:** +

## Peptide No.164

**DYPLASKDAK**

**Confirmed sites:** @Y:2,@S:6

**Ambiguous sites:**

**MS/MS Fragmentation of** **DYPLASKDAK**

Found in **IMDH2\_MOUSE**, Inosine-5'-monophosphate dehydrogenase 2 OS=Mus musculus GN=Impdh2 PE=1 SV=2

Match to Query 1269: 1350.586238 from(676.300395,2+)

Title: Elution from: 42.036 to 42.036 scan no 3716 cid35.00 polarity:+:MA10

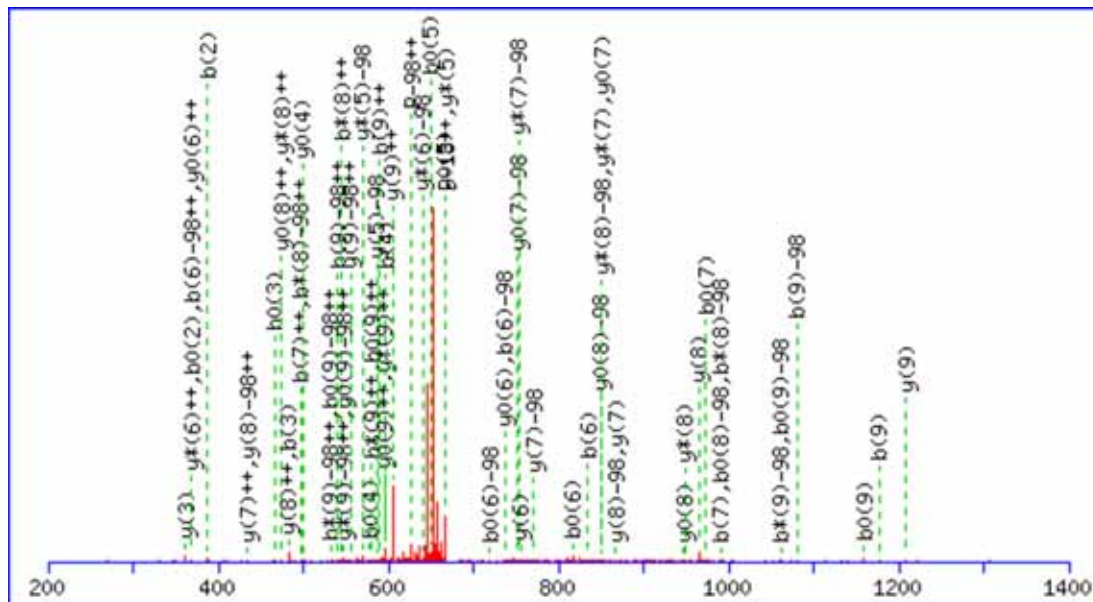

**Monoisotopic mass of neutral peptide Mr(calc):** 1350.5873

**Fixed modifications:** Carbamidomethyl (C) (apply to specified residues or termini only)

**Variable modifications:**

**N-term :** Dimethyl (N-term)

**Y2 :** Phospho (Y)

**S6 :** Phospho (ST), with neutral losses 0.0000(shown in table), 97.9769

**K7 :** Dimethyl (K)

**K10 :** Dimethyl (K)

**Ions Score:** 27 **Expect:** 0.043

**Matched b ions:** b(2), b(3), b(4), b(6)-98++, b(6)-98, b(6), b(7), b(7)++, b(9), b(9)-98, b(9)-98++, b(9)++

**Matched y ions:** y(3), y(5)-98, y(6), y(7)++, y(7)-98, y(7), y(8)++, y(8), y(8)-98++, y(8)-98, y(9), y(9)++, y(9)-98++

**Precursor origin neutral loss:** +

## Peptide No.165

**EADEEDSDEETSYPER**

**Confirmed sites:** @S:7

**Ambiguous sites:**

**MS/MS Fragmentation of EADEEDSDEETSYPER**

Found in **CF203\_MOUSE**, Uncharacterized protein C6orf203 homolog OS=Mus musculus PE=1 SV=1

Match to Query 5646: 2007.710610 from(1004.862581,2+)

Title: Elution from: 28.748 to 28.748 scan no 2131 cid35.00 polarity:+:MA10

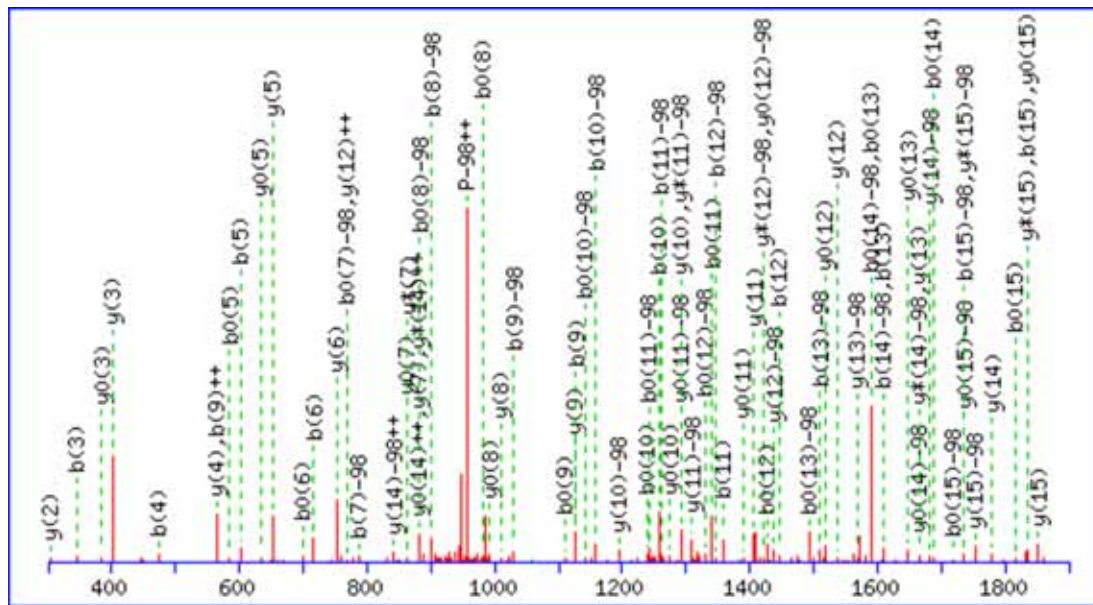

**Monoisotopic mass of neutral peptide Mr(calc):** 2007.7106

**Fixed modifications:** Carbamidomethyl (C) (apply to specified residues or termini only)

**Variable modifications:**

**N-term :** Dimethyl (N-term)

**S7 :** Phospho (ST), with neutral losses 97.9769(shown in table), 0.0000

**Ions Score:** 90 **Expect:** 1.3e-008

**Matched b ions:** b(3), b(4), b(5), b(6), b(7)-98, b(8)-98, b(9)++, b(9)-98, b(9), b(10), b(10)-98, b(11), b(11)-98, b(12)-98, b(12), b(13), b(13)-98, b(14)-98, b(15)-98, b(15)

**Matched y ions:** y(2), y(3), y(4), y(5), y(6), y(7), y(8), y(9), y(10), y(10)-98, y(11)-98, y(11), y(12)-98, y(12)++, y(12), y(13), y(13)-98, y(14)-98++, y(14), y(14)-98, y(15)-98, y(15)

**Precursor origin neutral loss:** +

## Peptide No.166

**EADEEDSDEETSYPER**

**Confirmed sites:** @S:7

**Ambiguous sites:**

MS/MS Fragmentation of **EADEEDSDEETSYPER**

Found in **CF203\_MOUSE**, Uncharacterized protein C6orf203 homolog OS=Mus musculus PE=1 SV=1

Match to Query 6566: 2013.742288 from(1007.878420,2+)

Title: Elution from: 28.410 to 28.410 scan no 1998 cid35.00 polarity:+:MA10

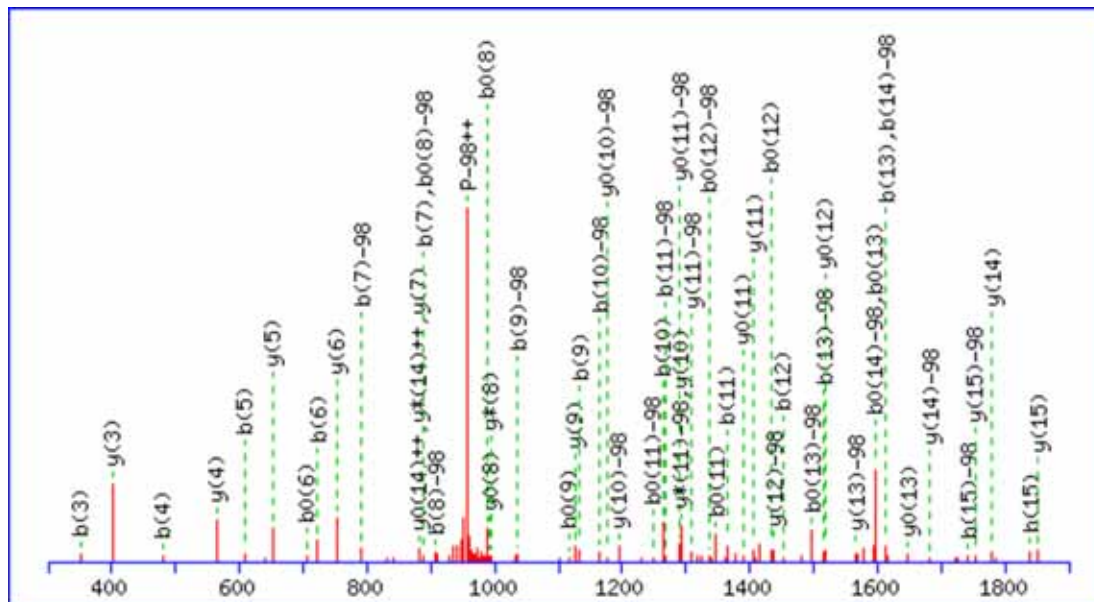

**Monoisotopic mass of neutral peptide Mr(calc):** 2013.7424

**Fixed modifications:** Carbamidomethyl (C) (apply to specified residues or termini only)

**Variable modifications:**

**N-term :** Dimethyl:2H(4)13C(2) (N-term)

**S7 :** Phospho (ST), with neutral losses 97.9769(shown in table), 0.0000

**Ions Score:** 81 **Expect:** 1.6e-007

**Matched b ions:** b(3), b(4), b(5), b(6), b(7)-98, b(7), b(8)-98, b(9), b(9)-98, b(10), b(10)-98, b(11), b(11)-98, b(12), b(13)-98, b(13), b(14)-98, b(15)-98, b(15)

**Matched y ions:** y(3), y(4), y(5), y(6), y(7), y(9), y(10)-98, y(10), y(11), y(11)-98, y(12)-98, y(13)-98, y(14)-98, y(14), y(15), y(15)-98

**Precursor origin neutral loss:** +

## Peptide No.167

**EAEESGSGEEEDENIEVVYSK**

**Confirmed sites:** @S:6,@S:7

**Ambiguous sites:**

MS/MS Fragmentation of **EAEESGSGEEEDENIEVVYSK**

Found in **IF5\_MOUSE**, Eukaryotic translation initiation factor 5 OS=Mus musculus GN=Eif5 PE=1 SV=1

Match to Query 8461: 2917.084425 from(973.368751,3+)

Title: Elution from: 50.902 to 50.902 scan no 5018 cid35.00 polarity:+:MA10:m1s



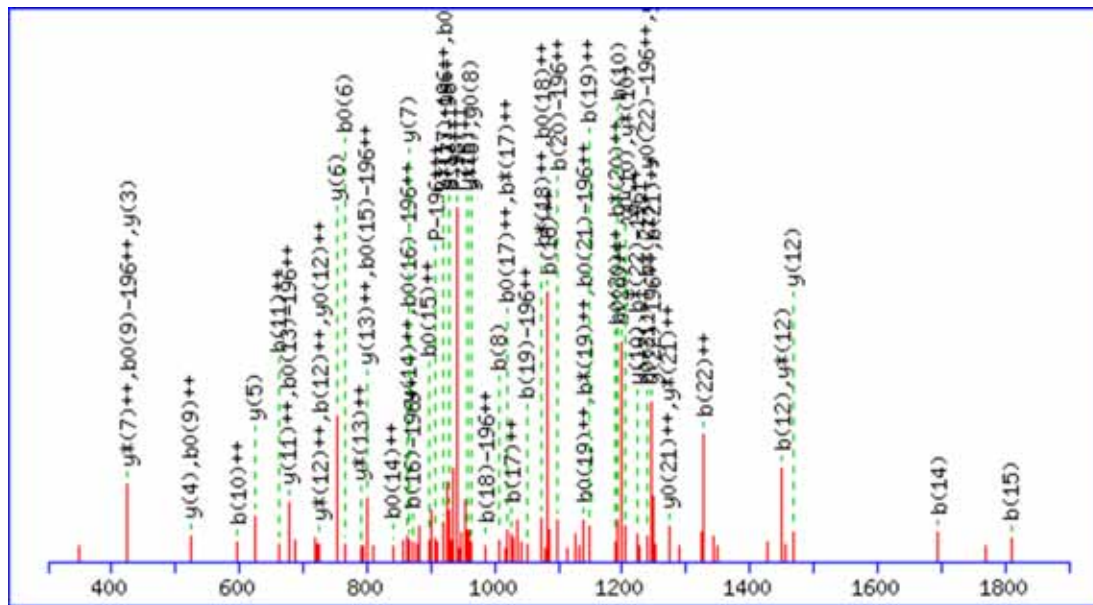

**Monoisotopic mass of neutral peptide Mr(calc):** 2917.0838

**Fixed modifications:** Carbamidomethyl (C) (apply to specified residues or termini only)

**Variable modifications:**

**N-term :** Dimethyl (N-term)

**S6 :** Phospho (ST), with neutral losses 0.0000(shown in table), 97.9769

**S7 :** Phospho (ST), with neutral losses 0.0000(shown in table), 97.9769

**K24 :** Dimethyl (K)

**Ions Score:** 32 **Expect:** 0.019

**Matched b ions:** b(8), b(8)-98, b(10)++, b(10), b(11)++, b(12)-98++, b(12), b(12)++, b(13)-98, b(14), b(14)-98++, b(15), b(15)-98++, b(16)-98++, b(16)-196++, b(17)-196++, b(17)++, b(18)++, b(18)-98++, b(18)-196++, b(19)-98++, b(19)++, b(19)-196++, b(20)++, b(20)-98++, b(20)-196++, b(21)-98++, b(21)++, b(22)++, b(23)-98++

**Matched y ions:** y(3), y(4), y(5), y(6), y(7), y(10), y(11)++, y(12), y(13)++, y(14)++, y(16)++, y(22)-196++

**Precursor origin neutral loss:** +

## Peptide No.168

**EALISQLTR**

**Confirmed sites:** @S:5

**Ambiguous sites:**

**MS/MS Fragmentation of EALISQLTR**

Found in **MYH7\_MOUSE**, Myosin-7 OS=Mus musculus GN=Myh7 PE=1 SV=1

Match to Query 961: 1137.580088 from(569.797320,2+)

Title: Elution from: 52.953 to 52.953 scan no 5244 cid35.00 polarity:+:MA10

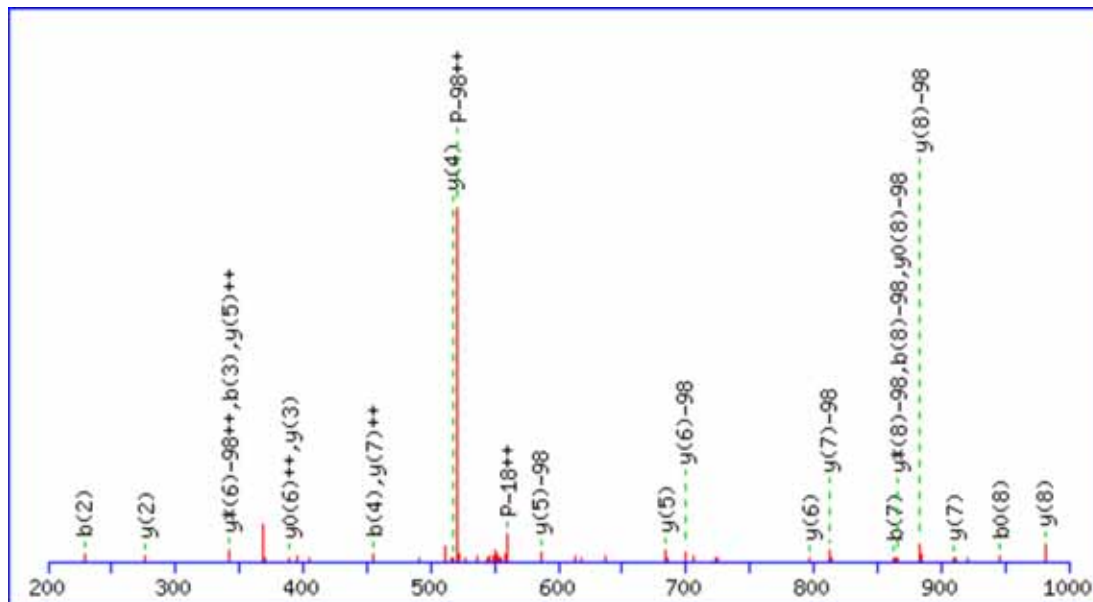

**Monoisotopic mass of neutral peptide Mr(calc):** 1137.5795

**Fixed modifications:** Carbamidomethyl (C) (apply to specified residues or termini only)

**Variable modifications:**

**N-term :** Dimethyl (N-term)

**S5 :** Phospho (ST), with neutral losses 97.9769(shown in table), 0.0000

**Ions Score:** 33 **Expect:** 0.017

**Matched b ions:** b(2), b(3), b(4), b(7), b(8)-98

**Matched y ions:** y(2), y(3), y(4), y(5), y(5)++, y(5)-98, y(6)-98, y(6), y(7)-98, y(7)++, y(7), y(8)-98, y(8)

**Precursor origin neutral loss:** +

## Peptide No.169

**EDSGTFSLGK**

**Confirmed sites:** @S:3

**Ambiguous sites:**

MS/MS Fragmentation of **EDSGTFSLGK**

Found in **PRKRA\_MOUSE**, Interferon-inducible double stranded RNA-dependent protein kinase activator A OS=Mus musculus GN=Prkra PE=1 SV=1

Match to Query 1121: 1175.511470 from(588.763011,2+)

Title: Elution from: 39.125 to 39.125 scan no 3549 cid35.00 polarity:+:MA10

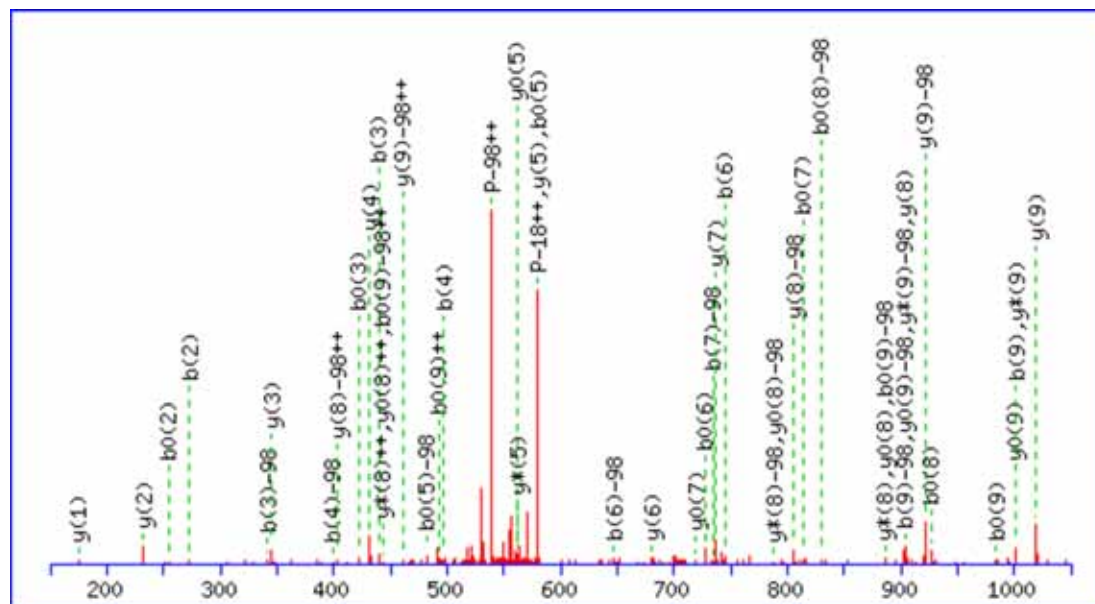

**Monoisotopic mass of neutral peptide Mr(calc):** 1175.5111

**Fixed modifications:** Carbamidomethyl (C) (apply to specified residues or termini only)

**Variable modifications:**

**N-term :** Dimethyl (N-term)

**S3 :** Phospho (ST), with neutral losses 97.9769(shown in table), 0.0000

**K10 :** Dimethyl (K)

**Ions Score:** 66 **Expect:** 4.7e-006

**Matched b ions:** b(2), b(3), b(3)-98, b(4)-98, b(4), b(6)-98, b(6), b(7)-98, b(9)-98, b(9)

**Matched y ions:** y(1), y(2), y(3), y(4), y(5), y(6), y(7), y(8)-98, y(8), y(8)-98++, y(9)-98, y(9), y(9)-98++

**Precursor origin neutral loss:** +

## Peptide No.170

**EEAAEAAAPASQNGDDLENLEDPEK**

**Confirmed sites:** @S:11

**Ambiguous sites:**

MS/MS Fragmentation of **EEAAEAAAPASQNGDDLENLEDPEK**

Found in **ABEC2\_MOUSE**, Probable C->U-editing enzyme APOBEC-2 OS=Mus musculus

GN=Apobec2 PE=1 SV=1

Match to Query 8225: 2748.165369 from(917.062399,3+)

Title: Elution from: 46.527 to 46.527 scan no 4487 cid35.00 polarity:+:MA10:m1s

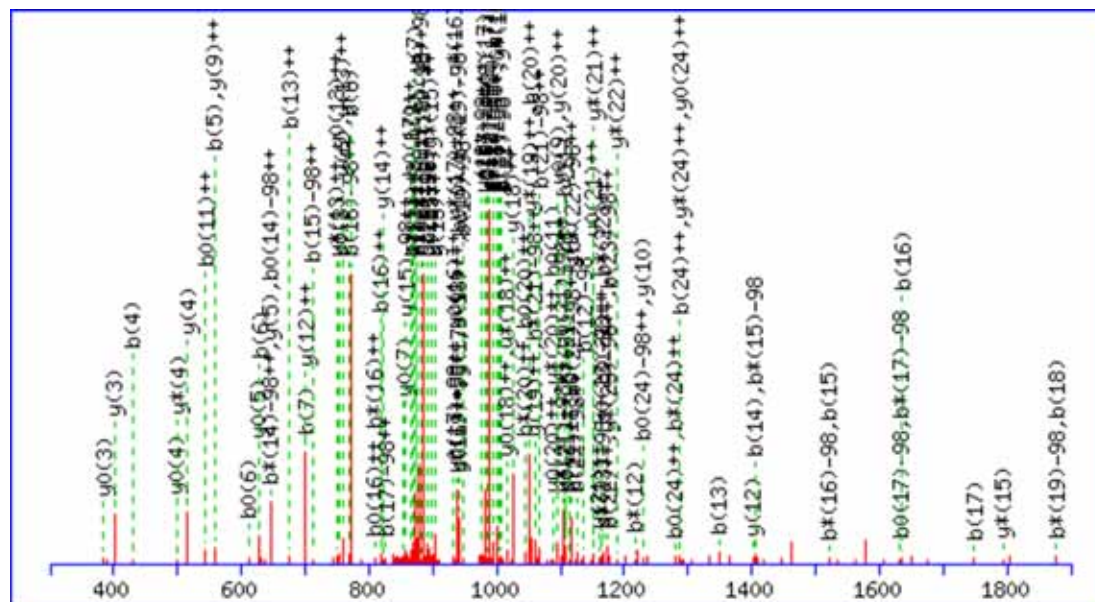

**Monoisotopic mass of neutral peptide Mr(calc):** 2748.1650

**Fixed modifications:** Carbamidomethyl (C) (apply to specified residues or termini only)

**Variable modifications:**

**N-term :** Dimethyl (N-term)

**S11 :** Phospho (ST), with neutral losses 0.0000(shown in table), 97.9769

**K25 :** Dimethyl (K)

**Ions Score:** 86 **Expect:** 1.7e-007

**Matched b ions:** b(4), b(5), b(6), b(7), b(8), b(9), b(10), b(11), b(11)-98, b(12)-98, b(13), b(13)++, b(14), b(15), b(15)-98++, b(16), b(16)-98++, b(16)++, b(17), b(17)++, b(17)-98++, b(18), b(18)++, b(18)-98++, b(19)++, b(19)-98++, b(20)++, b(20)-98++, b(21)++, b(21)-98++, b(22)++, b(22)-98++, b(23)-98++, b(24)++

**Matched y ions:** y(3), y(4), y(5), y(6), y(7), y(8), y(9)++, y(9), y(10), y(12)++, y(12), y(13)++, y(14)++, y(15)-98++, y(15)++, y(16)++, y(16)-98++, y(17)++, y(17)-98++, y(18)++, y(18)-98++, y(19)++, y(20)++, y(21)++

**Precursor origin neutral loss:** +

## Peptide No.171

EEEGISQESSEEEQ

**Confirmed sites:** @S:10,@S:11

**Ambiguous sites:**

MS/MS Fragmentation of **EEEGISQESSEEEQ**

Found in **HMGA1\_MOUSE**, High mobility group protein HMG-I/HMG-Y OS=Mus musculus GN=Hmga1 PE=1 SV=4

Match to Query 4646: 1925.633792 from(963.824172,2+)

Title: Elution from: 31.238 to 31.238 scan no 2274 cid35.00 polarity:+:MA10



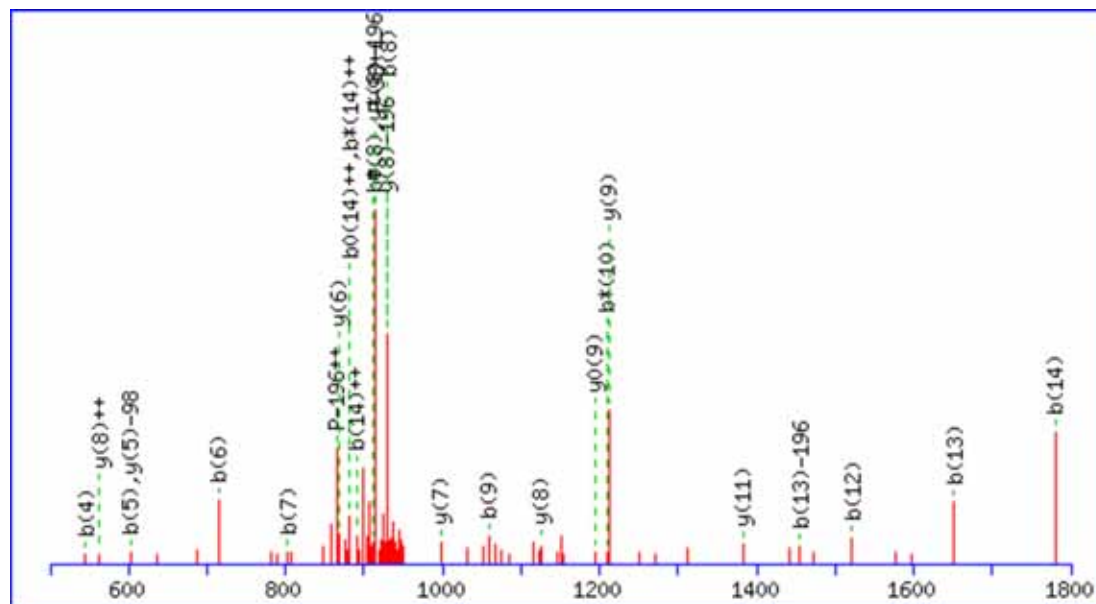

**Monoisotopic mass of neutral peptide Mr(calc):** 1925.6340

**Fixed modifications:** Carbamidomethyl (C) (apply to specified residues or termini only)

**Variable modifications:**

**N-term :** Dimethyl (N-term)

**S10 :** Phospho (ST), with neutral losses 0.0000(shown in table), 97.9769

**S11 :** Phospho (ST), with neutral losses 0.0000(shown in table), 97.9769

**Ions Score:** 44 **Expect:** 0.00016

**Matched b ions:** b(4), b(5), b(6), b(7), b(8), b(9), b(12), b(13), b(13)-196, b(14), b(14)++

**Matched y ions:** y(5)-98, y(6), y(7), y(7)-98, y(8)++, y(8), y(8)-196, y(9), y(9)-98, y(11)

**Precursor origin neutral loss:** +

## Peptide No.172

**EELEQQTDGDCDEEDDDKDGEVPK**

**Confirmed sites:** @T:7

**Ambiguous sites:**

**MS/MS Fragmentation of EELEQQTDGDCDEEDDDKDGEVPK**

Found in **SEC62\_MOUSE**, Translocation protein SEC62 OS=Mus musculus GN=Sec62 PE=1 SV=1

Match to Query 8524: 2958.149829 from(987.057219,3+)

Title: Elution from: 32.344 to 32.344 scan no 2626 cid35.00 polarity:+:MA10:m1s



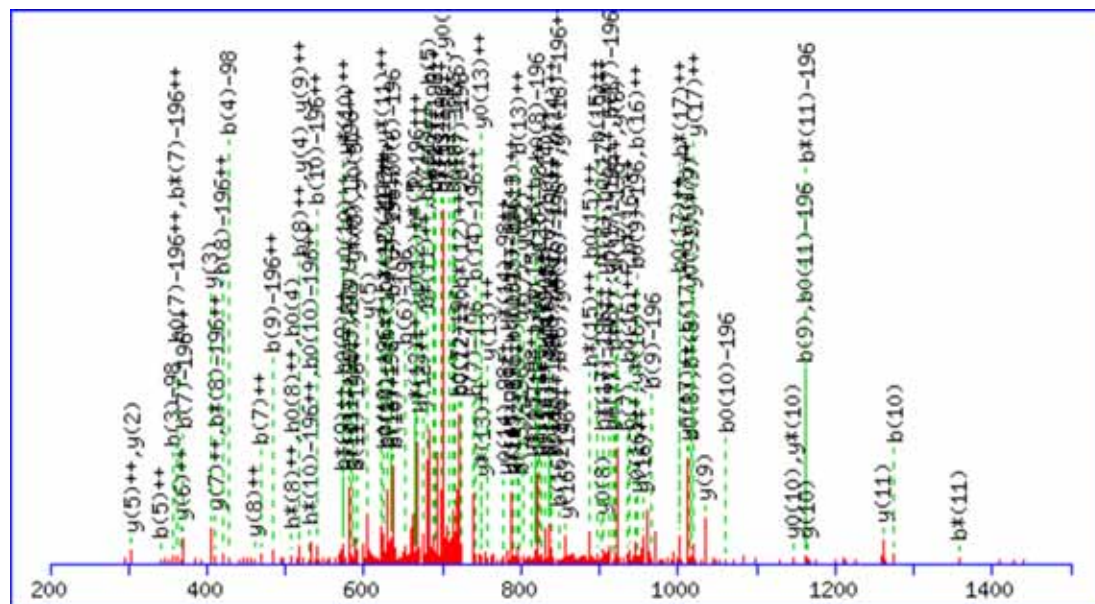

**Monoisotopic mass of neutral peptide Mr(calc):** 2193.9191

**Fixed modifications:** Carbamidomethyl (C) (apply to specified residues or termini only)

**Variable modifications:**

**N-term :** Dimethyl (N-term)

**S3 :** Phospho (ST), with neutral losses 97.9769(shown in table), 0.0000

**S6 :** Phospho (ST), with neutral losses 97.9769(shown in table), 0.0000

**Ions Score:** 33 **Expect:** 0.023

**Matched b ions:** b(3)-98, b(4)-98, b(5)++, b(5)-98, b(5), b(6)-196, b(6)-98, b(6), b(7)-196++, b(7)-98, b(7)++, b(7)-98++, b(7)-196, b(7), b(8)-196, b(8)-98++, b(8)-196++, b(8)++, b(8)-98, b(9)++, b(9), b(9)-196++, b(9)-98++, b(9)-196, b(10)-98++, b(10), b(10)++, b(10)-196++, b(10)-98, b(11)-196++, b(11)-98++, b(11)++, b(12)-98++, b(12)-196++, b(13)-196++, b(13)++, b(13)-98++, b(14)++, b(14)-196++, b(14)-98++, b(15)-196++, b(15)++, b(16)-196++, b(16)++, b(17)++, b(17)-98++, b(17)-196++

**Matched y ions:** y(2), y(3), y(4), y(5)++, y(5), y(6)++, y(7), y(7)++, y(8), y(8)++, y(9), y(9)++, y(10)++, y(10), y(11), y(11)++, y(12)++, y(13)-98++, y(13)++, y(14)-98++, y(14)++, y(15)-98++, y(16)-196++, y(16)++, y(16)-98++, y(17)-196++, y(17)-98++, y(17)++

**Precursor origin neutral loss:** +

## Peptide No.174

**EESARSSPELTSESLTQR**

**Confirmed sites:** @S:6,@S:7

**Ambiguous sites:**

MS/MS Fragmentation of **EESARSSPELTSESLTQR**

Found in **SVIL\_MOUSE**, Supervillin OS=Mus musculus GN=Svil PE=1 SV=1

Match to Query 5924: 2193.922062 from(732.314630,3+)

Title: Elution from: 36.975 to 36.975 scan no 3093 cid35.00 polarity:+:MA10:m1s

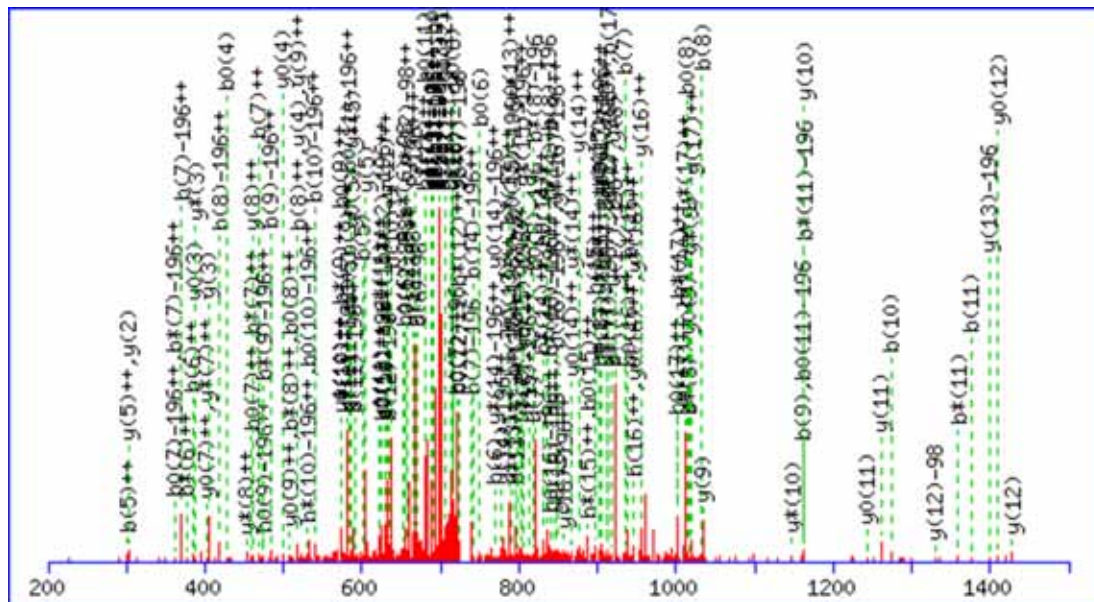

**Monoisotopic mass of neutral peptide Mr(calc):** 2193.9191

**Fixed modifications:** Carbamidomethyl (C) (apply to specified residues or termini only)

**Variable modifications:**

**N-term :** Dimethyl (N-term)

**S6 :** Phospho (ST), with neutral losses 0.0000(shown in table), 97.9769

**S7 :** Phospho (ST), with neutral losses 0.0000(shown in table), 97.9769

**Ions Score:** 47 **Expect:** 0.00096

**Matched b ions:** b(5)++, b(5), b(6)++, b(6)-98, b(6), b(7)-196++, b(7)-98++, b(7)-98, b(7)-196, b(7)++, b(7), b(8)++, b(8)-196++, b(8), b(8)-98++, b(8)-196, b(9)++, b(9), b(9)-196++, b(9)-98++, b(10), b(10)-98++, b(10)++, b(10)-196++, b(11), b(11)++, b(11)-196++, b(11)-98++, b(12)-98++, b(12)-196++, b(13)++, b(13)-196++, b(13)-98++, b(14)-196++, b(14)-98++, b(14)++, b(15)++, b(15)-98++, b(16)-196++, b(16)-98++, b(16)++, b(17)++, b(17)-98++, b(17)-196++

**Matched y ions:** y(2), y(3), y(4), y(5)++, y(5), y(7), y(8), y(8)++, y(9)++, y(9), y(10)++, y(10), y(11), y(11)++, y(12), y(12)-98, y(12)++, y(12)-98++, y(13)-196++, y(13)-196, y(13)++, y(14)++, y(14)-196++, y(14)-98++, y(15)-196++, y(15)-98++, y(15)++, y(16)++, y(16)-98++, y(16)-196++, y(17)-196++, y(17)-98++, y(17)++

**Precursor origin neutral loss:** +

## Peptide No.175

**EESEESDDDMGFGLFD**

**Confirmed sites:** @S:3,@S:6

**Ambiguous sites:**

MS/MS Fragmentation of **EESEESDDDMGFGLFD**

Found in **RLA2\_MOUSE**, 60S acidic ribosomal protein P2 OS=Mus musculus GN=Rplp2 PE=1 SV=3

Match to Query 5732: 2024.616358 from(1013.315455,2+)

Title: Elution from: 80.827 to 80.827 scan no 7422 cid35.00 polarity:+:MA10:m1s



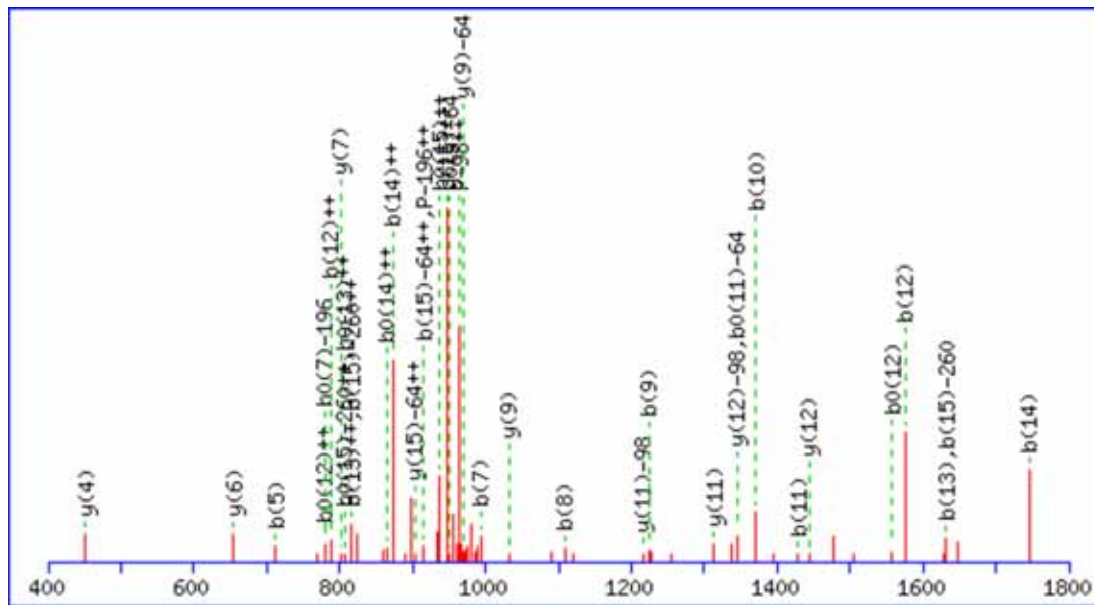

**Monoisotopic mass of neutral peptide Mr(calc):** 2024.6159

**Fixed modifications:** Carbamidomethyl (C) (apply to specified residues or termini only)

**Variable modifications:**

**N-term :** Dimethyl (N-term)

**S3 :** Phospho (ST), with neutral losses 0.0000(shown in table), 97.9769

**S6 :** Phospho (ST), with neutral losses 0.0000(shown in table), 97.9769

**M10 :** Oxidation (M), with neutral losses 0.0000(shown in table), 63.9983

**Ions Score:** 49 **Expect:** 3.6e-005

**Matched b ions:** b(5), b(7), b(8), b(9), b(10), b(11), b(12)-98, b(12), b(12)++, b(13)++, b(13), b(14), b(14)-98++, b(14)++, b(14)-98, b(15)++, b(15)-98++

**Matched y ions:** y(4), y(6), y(7), y(9), y(11)-98, y(11), y(12)-98, y(12)

**Precursor origin neutral loss:** +

## Peptide No.176

**EESEESDDDMGFGLFD**

**Confirmed sites:** @S:3,@S:6

**Ambiguous sites:**

**MS/MS Fragmentation of** **EESEESDDDMGFGLFD**

Found in **RLA2\_MOUSE**, 60S acidic ribosomal protein P2 OS=Mus musculus GN=Rplp2 PE=1 SV=3

Match to Query 6634: 2030.651400 from(1016.332976,2+)

Title: Elution from: 80.995 to 80.995 scan no 7681 cid35.00 polarity:+:MA10:m1s

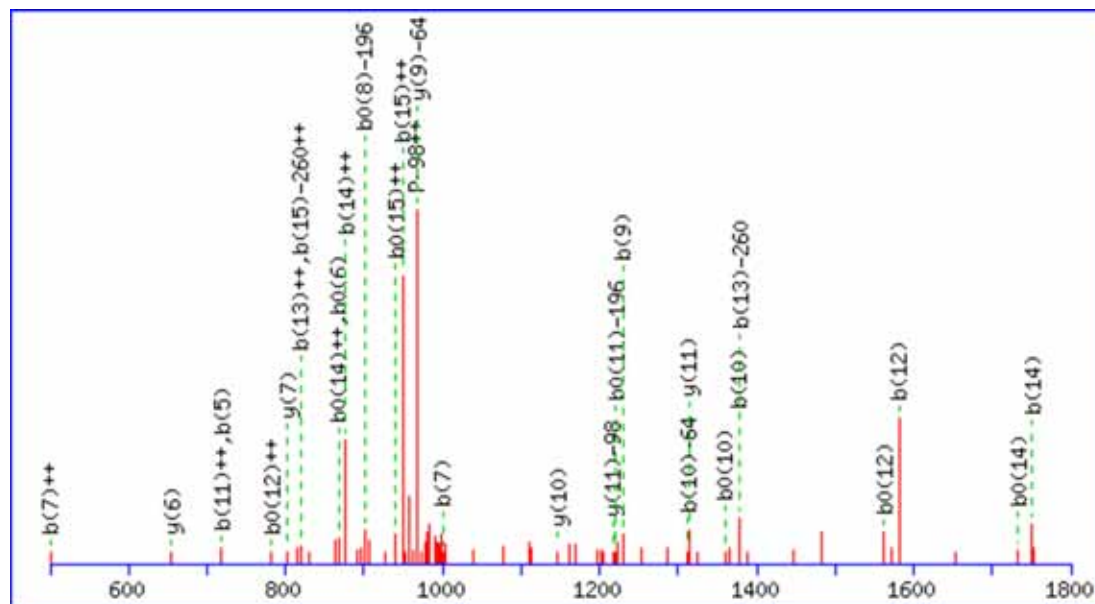

**Monoisotopic mass of neutral peptide Mr(calc):** 2030.6478

**Fixed modifications:** Carbamidomethyl (C) (apply to specified residues or termini only)

**Variable modifications:**

**N-term :** Dimethyl:2H(4)13C(2) (N-term)

**S3 :** Phospho (ST), with neutral losses 0.0000(shown in table), 97.9769

**S6 :** Phospho (ST), with neutral losses 0.0000(shown in table), 97.9769

**M10 :** Oxidation (M), with neutral losses 0.0000(shown in table), 63.9983

**Ions Score:** 28 **Expect:** 0.006

**Matched b ions:** b(5), b(7)++, b(7), b(9), b(10), b(11)++, b(12)-98, b(12), b(13)++, b(14)++, b(14)-98, b(14), b(15)-98++, b(15)++

**Matched y ions:** y(6), y(7), y(10), y(11), y(11)-98

**Precursor origin neutral loss:** +

## Peptide No.177

**EESEESDEDMGFGLFD**

**Confirmed sites:** @S:3,@S:6

**Ambiguous sites:**

MS/MS Fragmentation of **EESEESDEDMGFGLFD**

Found in **RLA0\_MOUSE**, 60S acidic ribosomal protein P0 OS=Mus musculus GN=Rplp0 PE=1 SV=3

Match to Query 4576: 2038.635246 from(1020.324899,2+)

Title: Elution from: 81.108 to 81.108 scan no 7185 cid35.00 polarity:+:MA10:m1s

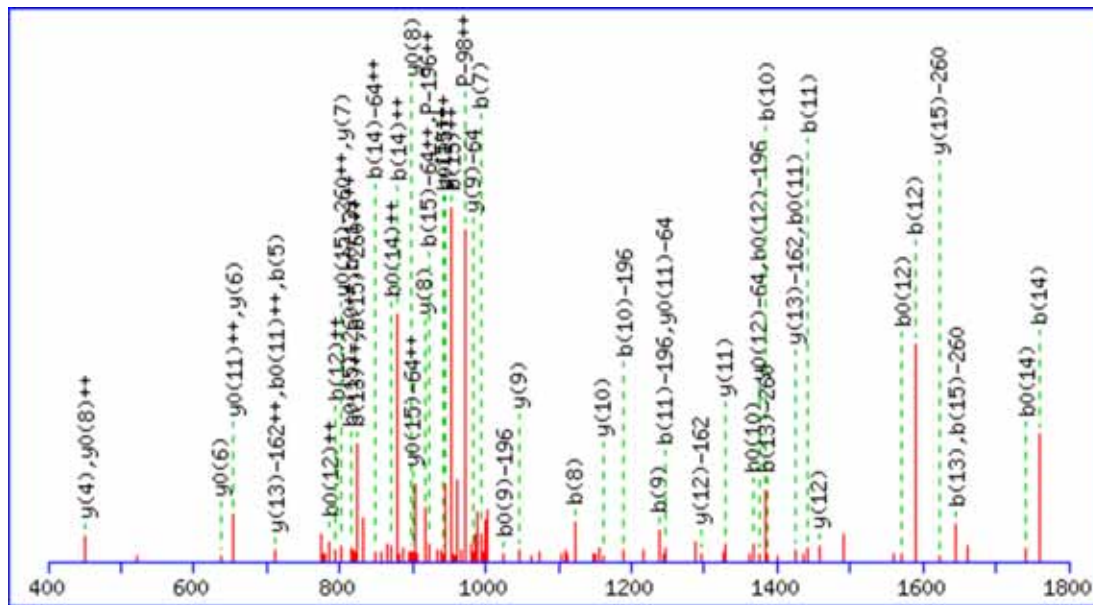

**Monoisotopic mass of neutral peptide Mr(calc):** 2038.6316

**Fixed modifications:** Carbamidomethyl (C) (apply to specified residues or termini only)

**Variable modifications:**

**N-term :** Dimethyl (N-term)

**S3 :** Phospho (ST), with neutral losses 0.0000(shown in table), 97.9769

**S6 :** Phospho (ST), with neutral losses 0.0000(shown in table), 97.9769

**M10 :** Oxidation (M), with neutral losses 0.0000(shown in table), 63.9983

**Ions Score:** 44 **Expect:** 0.00014

**Matched b ions:** b(5), b(6)-98, b(7), b(7)-98, b(8), b(8)-98, b(9), b(10)-98, b(10), b(10)-196, b(11)-196, b(11), b(12)-98, b(12), b(12)++, b(13)++, b(13), b(13)-98++, b(14)++, b(14)-98, b(14), b(14)-98++, b(15)++, b(15)-98++

**Matched y ions:** y(4), y(6), y(7), y(8), y(9), y(10), y(11), y(12), y(15)++

**Precursor origin neutral loss:** +

## Peptide No.178

**EESEESDEDMGFGLFD**

**Confirmed sites:** @S:6

**Ambiguous sites:**

MS/MS Fragmentation of **EESEESDEDMGFGLFD**

Found in **RLA0\_MOUSE**, 60S acidic ribosomal protein P0 OS=Mus musculus GN=Rplp0 PE=1 SV=3

Match to Query 6300: 1958.666190 from(980.340371,2+)

Title: Elution from: 68.837 to 68.837 scan no 6802 cid35.00 polarity:+:MA10:m1s

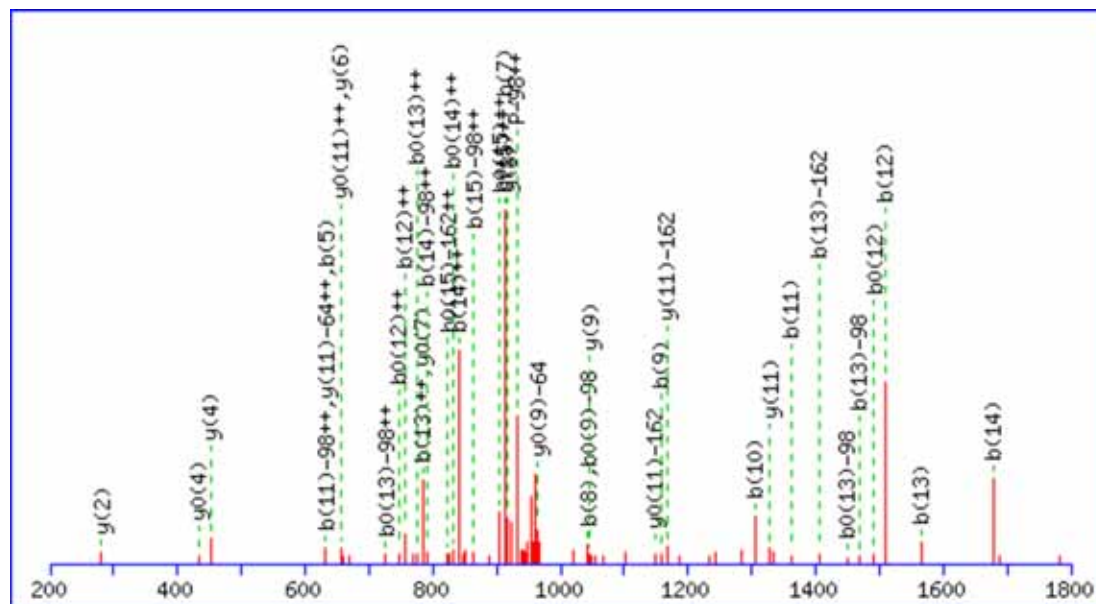

**Monoisotopic mass of neutral peptide Mr(calc):** 1958.6653

**Fixed modifications:** Carbamidomethyl (C) (apply to specified residues or termini only)

**Variable modifications:**

**N-term :** Dimethyl (N-term)

**S6 :** Phospho (ST), with neutral losses 0.0000(shown in table), 97.9769

**M10 :** Oxidation (M), with neutral losses 0.0000(shown in table), 63.9983

**Ions Score:** 39 **Expect:** 0.00092

**Matched b ions:** b(5), b(7), b(8), b(9), b(10), b(11)-98++, b(11), b(12)++, b(12), b(13)++, b(13)-98, b(13), b(14)++, b(14), b(14)-98++, b(15)++, b(15)-98++

**Matched y ions:** y(2), y(4), y(6), y(8), y(9), y(11)

**Precursor origin neutral loss:** +

## Peptide No.179

**EESEESDEDMGFGLFD**

**Confirmed sites:** @S:3,@S:6

**Ambiguous sites:**

MS/MS Fragmentation of **EESEESDEDMGFGLFD**

Found in **RLA0\_MOUSE**, 60S acidic ribosomal protein P0 OS=Mus musculus GN=Rplp0 PE=1 SV=3

Match to Query 4532: 2022.637752 from(1012.326152,2+)

Title: Elution from: 95.378 to 95.378 scan no 7962 cid35.00 polarity:+:MA10:m1s



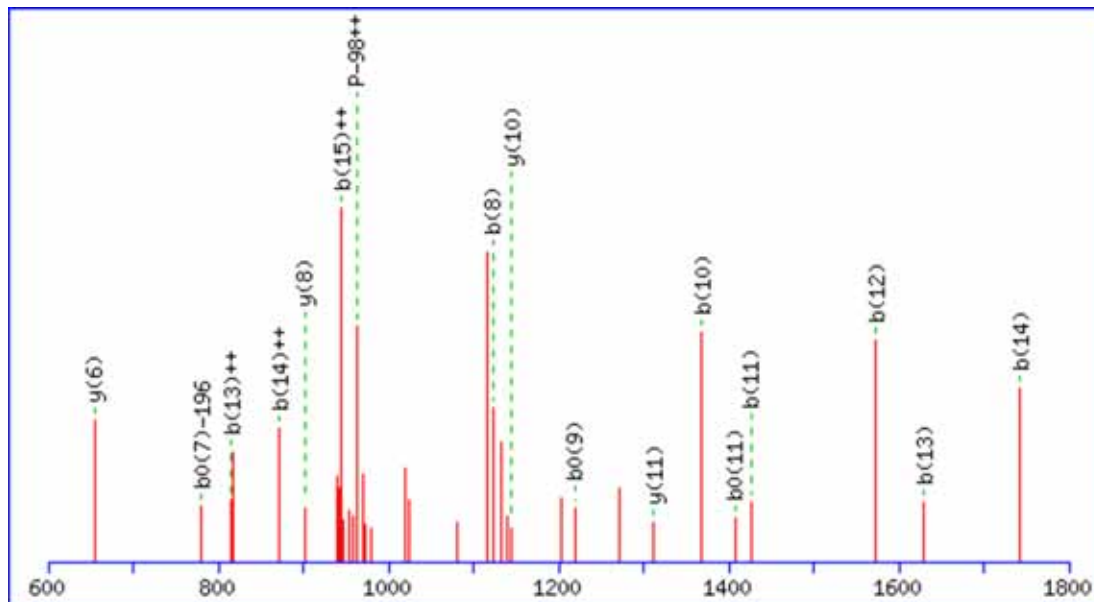

**Monoisotopic mass of neutral peptide Mr(calc):** 2022.6367

**Fixed modifications:** Carbamidomethyl (C) (apply to specified residues or termini only)

**Variable modifications:**

**N-term :** Dimethyl (N-term)

**S3 :** Phospho (ST), with neutral losses 0.0000(shown in table), 97.9769

**S6 :** Phospho (ST), with neutral losses 0.0000(shown in table), 97.9769

**Ions Score:** 35 **Expect:** 0.0013

**Matched b ions:** b(6)-98, b(8), b(8)-98, b(9)-98, b(10)-98, b(10), b(11), b(12), b(13)++, b(13), b(14), b(14)++, b(15)++

**Matched y ions:** y(6), y(8), y(10), y(11)

**Precursor origin neutral loss:** +

## Peptide No.180

**EESEESDEDMGFGLFD**

**Confirmed sites:** @S:3,@S:6

**Ambiguous sites:**

MS/MS Fragmentation of **EESEESDEDMGFGLFD**

Found in **RLA0\_MOUSE**, 60S acidic ribosomal protein P0 OS=Mus musculus GN=Rplp0 PE=1 SV=3

Match to Query 5347: 2044.664950 from(1023.339751,2+)

Title: Elution from: 81.071 to 81.071 scan no 7201 cid35.00 polarity:+:MA10:m1s

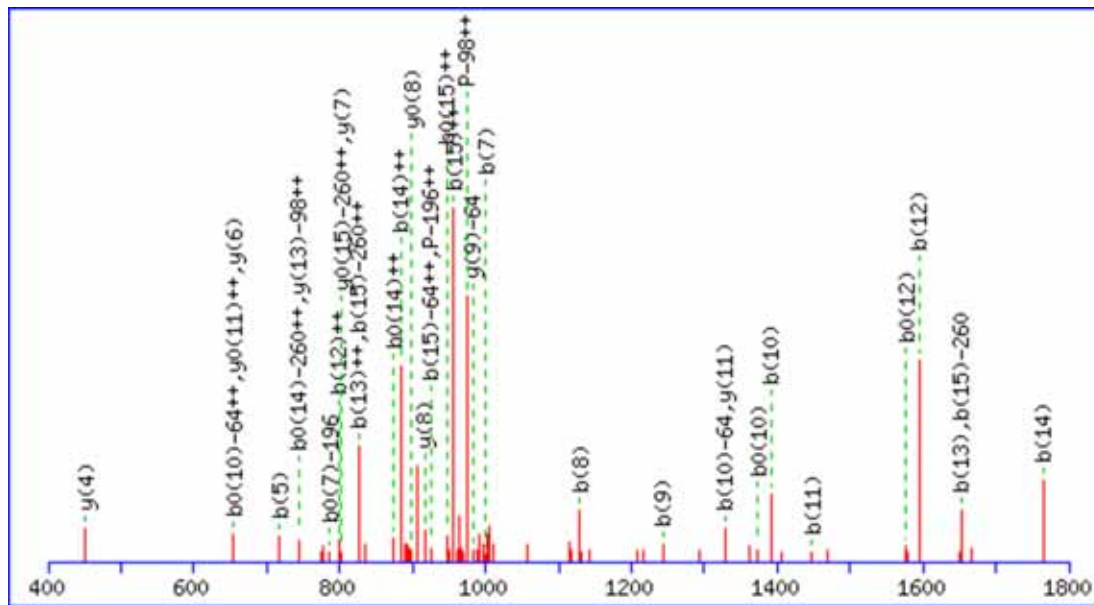

**Monoisotopic mass of neutral peptide Mr(calc):** 2044.6634

**Fixed modifications:** Carbamidomethyl (C) (apply to specified residues or termini only)

**Variable modifications:**

**N-term :** Dimethyl:2H(4)13C(2) (N-term)

**S3 :** Phospho (ST), with neutral losses 0.0000(shown in table), 97.9769

**S6 :** Phospho (ST), with neutral losses 0.0000(shown in table), 97.9769

**M10 :** Oxidation (M), with neutral losses 0.0000(shown in table), 63.9983

**Ions Score:** 49 **Expect:** 8.9e-005

**Matched b ions:** b(5), b(6)-98, b(7)-98++, b(7), b(8), b(9), b(10), b(10)-98, b(11), b(12), b(12)++, b(13)++, b(13), b(13)-98++, b(14)++, b(14), b(14)-98, b(14)-98++, b(15)++, b(15)-98++

**Matched y ions:** y(4), y(6), y(7), y(8), y(11), y(13)-98++, y(15)-98++

**Precursor origin neutral loss:** +

## Peptide No.181

**EESEEDMGLFD**

**Confirmed sites:** @S:3,@S:6

**Ambiguous sites:**

**MS/MS Fragmentation of** **EESEEDMGLFD**

Found in **RLA0\_MOUSE**, 60S acidic ribosomal protein P0 OS=Mus musculus GN=Rplp0 PE=1 SV=3

Match to Query 4553: 2028.668814 from(1015.341683,2+)

Title: Elution from: 95.398 to 95.398 scan no 7964 cid35.00 polarity:+:MA10:m1s

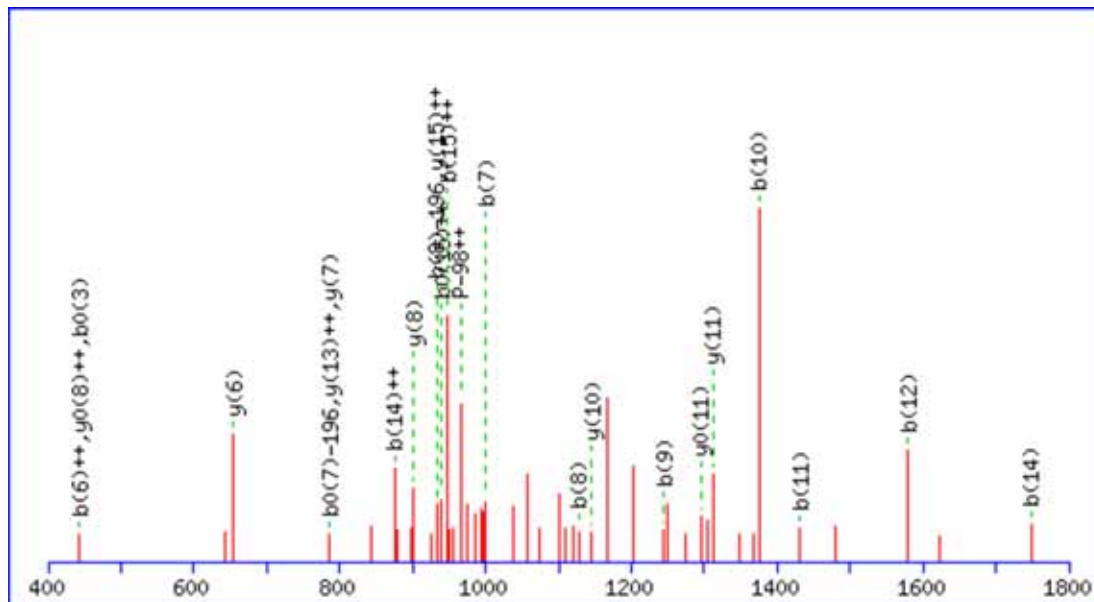

**Monoisotopic mass of neutral peptide Mr(calc):** 2028.6685

**Fixed modifications:** Carbamidomethyl (C) (apply to specified residues or termini only)

**Variable modifications:**

**N-term :** Dimethyl:2H(4)13C(2) (N-term)

**S3 :** Phospho (ST), with neutral losses 0.0000(shown in table), 97.9769

**S6 :** Phospho (ST), with neutral losses 0.0000(shown in table), 97.9769

**Ions Score:** 30 **Expect:** 0.0055

**Matched b ions:** b(6)++, b(7), b(8)-196, b(8), b(9), b(10), b(11), b(12)-98, b(12), b(14)++, b(14), b(15)++, b(15)-98++

**Matched y ions:** y(6), y(7), y(8), y(10), y(11), y(13)++, y(15)++

**Precursor origin neutral loss:** +

## Peptide No.182

**EESEESDEDMGFGLFD**

**Confirmed sites:** @S:3,@S:6

**Ambiguous sites:**

MS/MS Fragmentation of **EESEESDEDMGFGLFD**

Found in **RLA0\_MOUSE**, 60S acidic ribosomal protein P0 OS=Mus musculus GN=Rplp0 PE=1 SV=3

Match to Query 4773: 1994.607844 from(998.311198,2+)

Title: Elution from: 96.155 to 96.155 scan no 8036 cid35.00 polarity:+:MA10:m1s

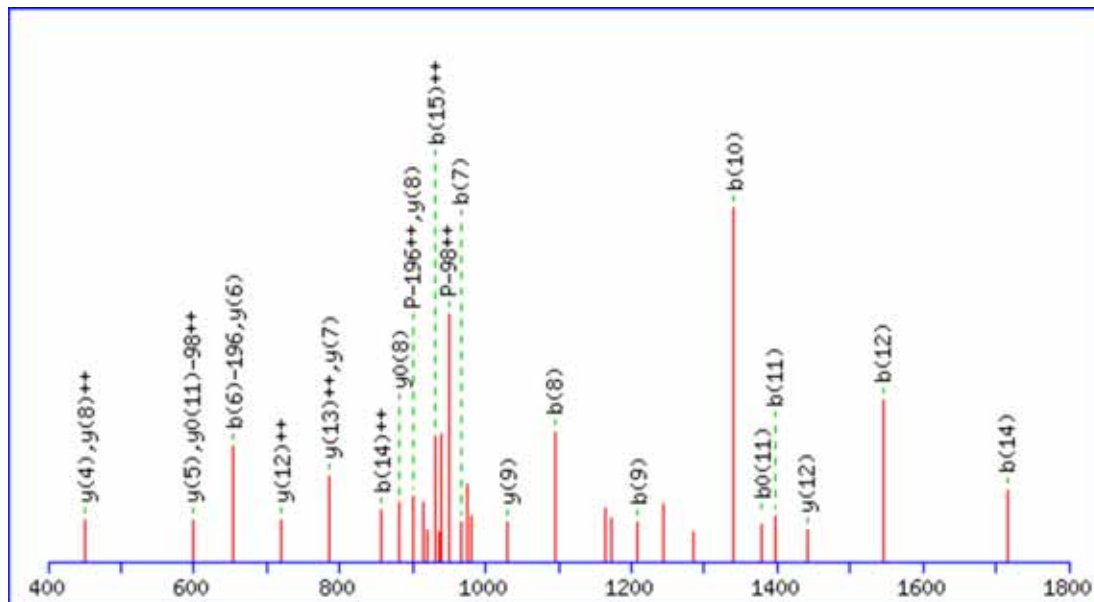

**Monoisotopic mass of neutral peptide Mr(calc):** 1994.6054

**Fixed modifications:** Carbamidomethyl (C) (apply to specified residues or termini only)

**Variable modifications:**

**S3 :** Phospho (ST), with neutral losses 0.0000(shown in table), 97.9769

**S6 :** Phospho (ST), with neutral losses 0.0000(shown in table), 97.9769

**Ions Score:** 52 **Expect:** 1.6e-005

**Matched b ions:** b(6)-196, b(7), b(8), b(9), b(10)-98, b(10), b(11), b(12), b(14), b(14)++, b(15)++, b(15)-98++

**Matched y ions:** y(4), y(5), y(6), y(7), y(8)++, y(8), y(9), y(12)++, y(12), y(13)++

**Precursor origin neutral loss:** +

## Peptide No.183

**EESESEDDMGFGLFD**

**Confirmed sites:** @S:3,@S:6

**Ambiguous sites:**

MS/MS Fragmentation of **EESESEDDMGFGLFD**

Found in **RLA1\_MOUSE**, 60S acidic ribosomal protein P1 OS=Mus musculus GN=Rplp1 PE=1 SV=1

Match to Query 5148: 2038.631962 from(1020.323257,2+)

Title: Elution from: 81.227 to 81.227 scan no 7301 cid35.00 polarity:+:MA10:m1s





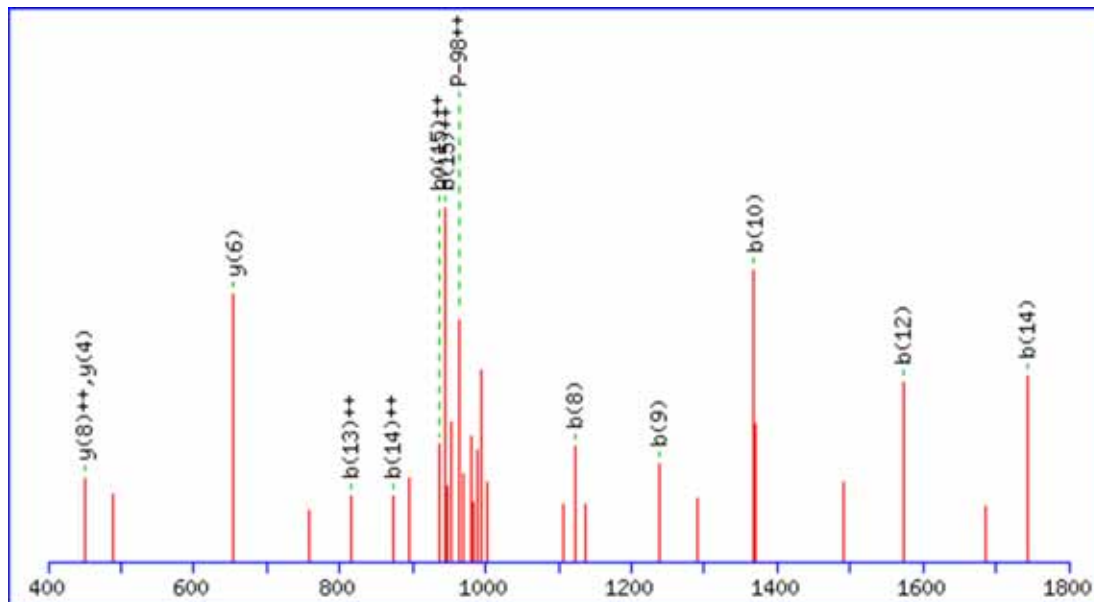

**Monoisotopic mass of neutral peptide Mr(calc):** 2022.6367

**Fixed modifications:** Carbamidomethyl (C) (apply to specified residues or termini only)

**Variable modifications:**

**N-term :** Dimethyl (N-term)

**S3 :** Phospho (ST), with neutral losses 0.0000(shown in table), 97.9769

**S6 :** Phospho (ST), with neutral losses 0.0000(shown in table), 97.9769

**Ions Score:** 31 **Expect:** 0.003

**Matched b ions:** b(8), b(9), b(10), b(12), b(13)++, b(14), b(14)++, b(15)++, b(15)-98++

**Matched y ions:** y(4), y(6), y(8)++

**Precursor origin neutral loss:** +

## Peptide No.185

**EESESEDDMGFGLFD**

**Confirmed sites:** @S:6

**Ambiguous sites:**

**MS/MS Fragmentation of** **EESESEDDMGFGLFD**

Found in **RLA1\_MOUSE**, 60S acidic ribosomal protein P1 OS=Mus musculus GN=Rplp1 PE=1 SV=1

Match to Query 4407: 1964.698086 from(983.356319,2+)

Title: Elution from: 68.972 to 68.972 scan no 6103 cid35.00 polarity:+:MA10:m1s

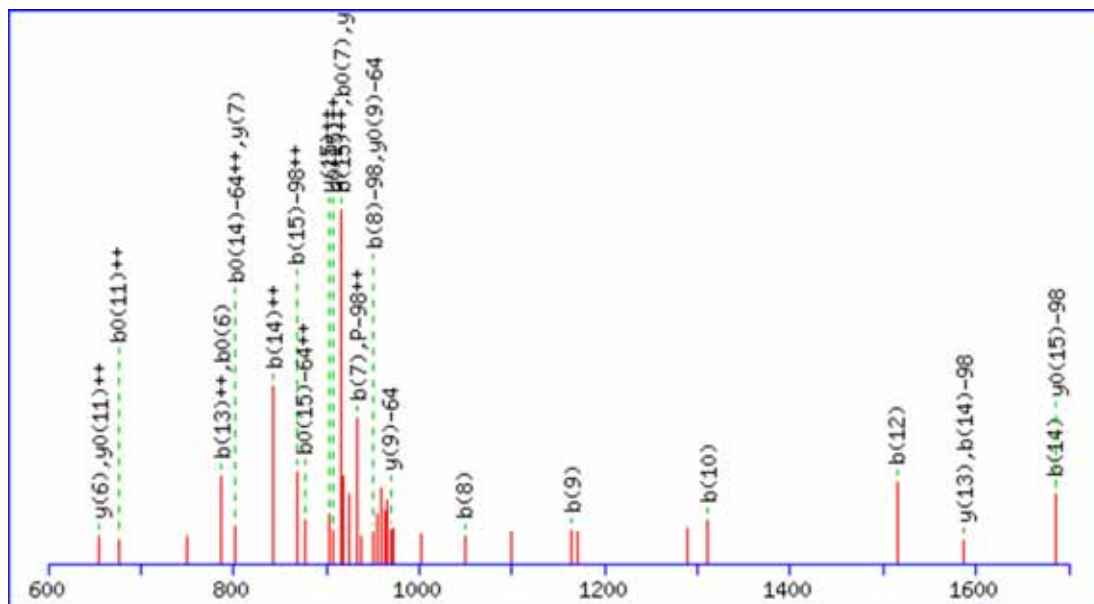

**Monoisotopic mass of neutral peptide Mr(calc):** 1964.6971

**Fixed modifications:** Carbamidomethyl (C) (apply to specified residues or termini only)

**Variable modifications:**

**N-term :** Dimethyl:2H(4)13C(2) (N-term)

**S6 :** Phospho (ST), with neutral losses 0.0000(shown in table), 97.9769

**M10 :** Oxidation (M), with neutral losses 0.0000(shown in table), 63.9983

**Ions Score:** 30 **Expect:** 0.013

**Matched b ions:** b(7), b(8), b(8)-98, b(9), b(10), b(12), b(13)++, b(14)++, b(14)-98, b(14), b(15)++, b(15)-98++

**Matched y ions:** y(6), y(7), y(8), y(13), y(15)++

**Precursor origin neutral loss:** +

## Peptide No.186

**EESPPPAVPEIPK**

**Confirmed sites:** @S:3

**Ambiguous sites:**

**MS/MS Fragmentation of EESPPPAVPEIPK**

Found in **TITIN\_MOUSE**, Titin OS=Mus musculus GN=Ttn PE=1 SV=1

Match to Query 2089: 1524.748810 from(763.381681,2+)

Title: Elution from: 42.469 to 42.469 scan no 3722 cid35.00 polarity:+:MA10

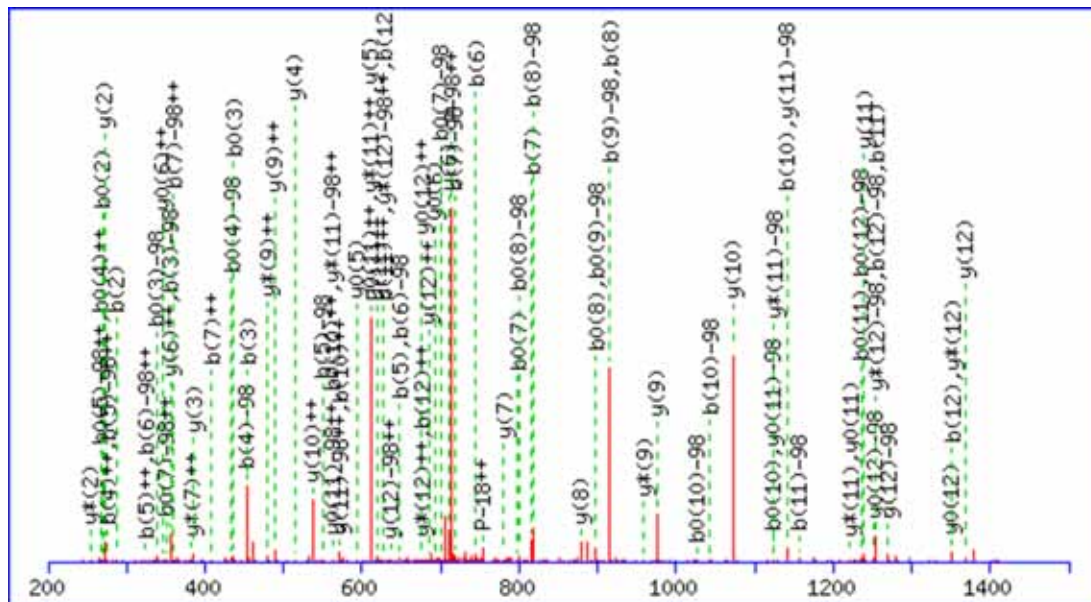

**Monoisotopic mass of neutral peptide Mr(calc):** 1524.7476

**Fixed modifications:** Carbamidomethyl (C) (apply to specified residues or termini only)

**Variable modifications:**

**N-term :** Dimethyl (N-term)

**S3 :** Phospho (ST), with neutral losses 97.9769(shown in table), 0.0000

**K13 :** Dimethyl (K)

**Ions Score:** 64 **Expect:** 1.9e-005

**Matched b ions:** b(2), b(3)-98, b(3), b(4)-98, b(4)++, b(5)++, b(5)-98++, b(5)-98, b(5), b(6), b(6)-98++, b(6)-98, b(7), b(7)++, b(7)-98, b(7)-98++, b(8)-98, b(8), b(9)-98, b(10)++, b(10), b(10)-98, b(11), b(11)-98, b(11)++, b(12)-98, b(12), b(12)-98++, b(12)++

**Matched y ions:** y(2), y(3), y(4), y(5), y(6)++, y(6), y(7), y(8), y(9), y(9)++, y(10), y(10)++, y(11), y(11)-98++, y(11)-98, y(11)++, y(12)-98, y(12), y(12)-98++, y(12)++

**Precursor origin neutral loss:** +

## Peptide No.187

**EESPPPAVPEIPK**

**Confirmed sites:** @S:3

**Ambiguous sites:**

**MS/MS Fragmentation of EESPPPAVPEIPK**

Found in **TITIN\_MOUSE**, Titin OS=Mus musculus GN=Ttn PE=1 SV=1

Match to Query 2068: 1536.812602 from(769.413577,2+)

Title: Elution from: 42.615 to 42.615 scan no 3791 cid35.00 polarity:+:MA10



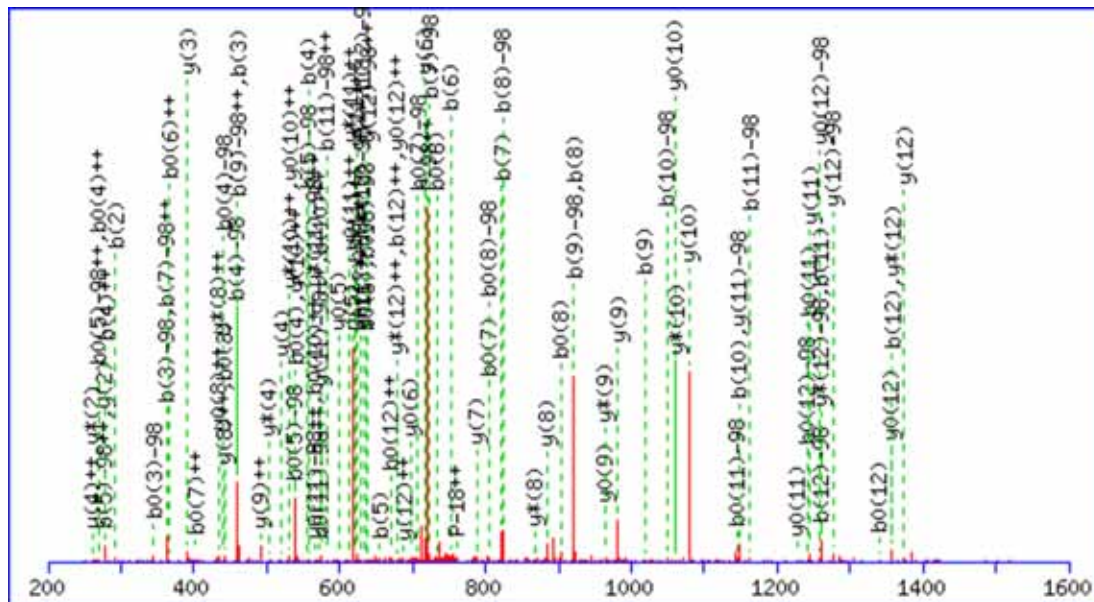

**Monoisotopic mass of neutral peptide Mr(calc):** 1536.8113

**Fixed modifications:** Carbamidomethyl (C) (apply to specified residues or termini only)

**Variable modifications:**

**N-term :** Dimethyl:2H(4)13C(2) (N-term)

**S3 :** Phospho (ST), with neutral losses 97.9769(shown in table), 0.0000

**K13 :** Dimethyl:2H(4)13C(2) (K)

**Ions Score:** 72 **Expect:** 3.1e-006

**Matched b ions:** b(2), b(3)-98, b(3), b(4)-98, b(4)++, b(4), b(5)-98++, b(5)-98, b(5), b(6), b(7)-98++, b(7), b(7)-98, b(8)-98, b(8), b(9)-98++, b(9)-98, b(9), b(10), b(10)-98, b(10)++, b(11), b(11)-98, b(11)-98++, b(11)++, b(12)-98, b(12), b(12)-98++, b(12)++

**Matched y ions:** y(2), y(3), y(4)++, y(4), y(5), y(6), y(7), y(8)++, y(8), y(9), y(9)++, y(10), y(10)++, y(11), y(11)-98, y(11)++, y(11)-98++, y(12)-98, y(12), y(12)-98++, y(12)++

**Precursor origin neutral loss:** +

## Peptide No.188

**EESPPAVPEIPKK**

**Confirmed sites:** @S:3

**Ambiguous sites:**

**MS/MS Fragmentation of EESPPAVPEIPKK**

Found in **TITIN\_MOUSE**, Titin OS=Mus musculus GN=Ttn PE=1 SV=1

Match to Query 2800: 1680.874116 from(561.298648,3+)

Title: Elution from: 36.115 to 36.115 scan no 2918 cid35.00 polarity:+:MA10



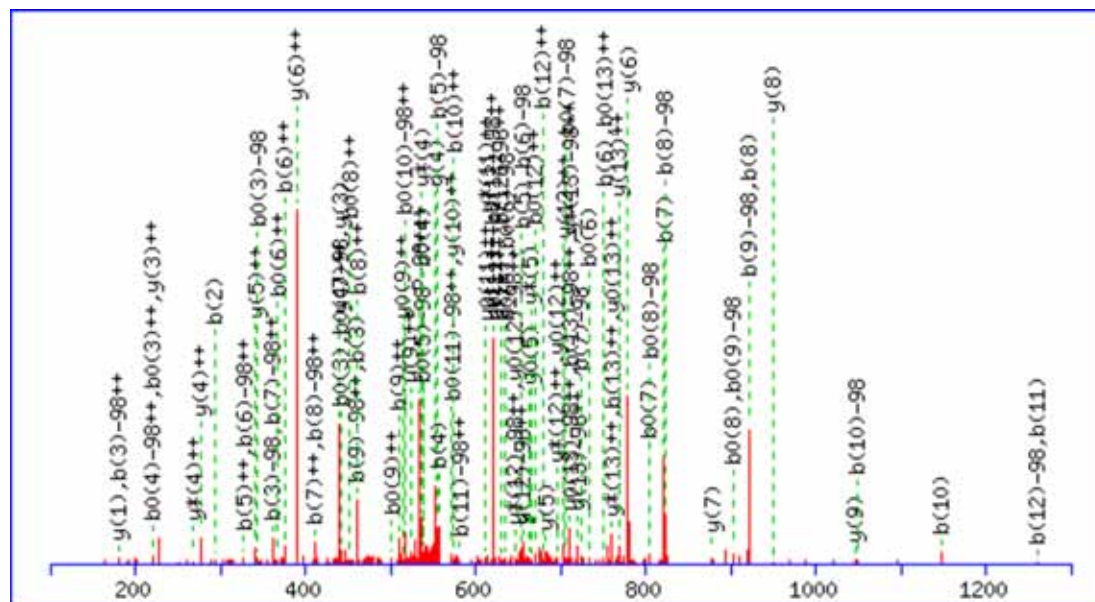

**Monoisotopic mass of neutral peptide Mr(calc):** 1698.9693

**Fixed modifications:** Carbamidomethyl (C) (apply to specified residues or termini only)

**Variable modifications:**

**N-term :** Dimethyl:2H(4)13C(2) (N-term)

**S3 :** Phospho (ST), with neutral losses 97.9769(shown in table), 0.0000

**K13 :** Dimethyl:2H(4)13C(2) (K)

**K14 :** Dimethyl:2H(4)13C(2) (K)

**Ions Score:** 50 **Expect:** 0.00039

**Matched b ions:** b(2), b(3)-98, b(3)-98++, b(3), b(4), b(5), b(5)++, b(5)-98, b(6)-98, b(6)-98++, b(6)++, b(6), b(7)-98++, b(7), b(7)++, b(7)-98, b(8), b(8)-98, b(8)-98++, b(8)++, b(9)-98, b(9)-98++, b(9)++, b(10), b(10)-98, b(10)++, b(11), b(11)-98++, b(11)++, b(12)-98, b(12)-98++, b(12)++, b(13)-98++, b(13)++

**Matched y ions:** y(1), y(3)++, y(3), y(4)++, y(4), y(5)++, y(5), y(6)++, y(6), y(7)++, y(7), y(8), y(9), y(9)++, y(10)++, y(11)++, y(12)-98++, y(12)++, y(13)-98++, y(13)++

**Precursor origin neutral loss:** +

## Peptide No.190

**EESSEDENEVSNILR**

**Confirmed sites:** @S:3,@S:4

**Ambiguous sites:**

MS/MS Fragmentation of **EESSEDENEVSNILR**

Found in **OTUD4\_MOUSE**, OTU domain-containing protein 4 OS=Mus musculus GN=Otud4 PE=1 SV=1

Match to Query 4860: 1936.735846 from(969.375199,2+)

Title: Elution from: 56.583 to 56.583 scan no 5414 cid35.00 polarity:+:MA10

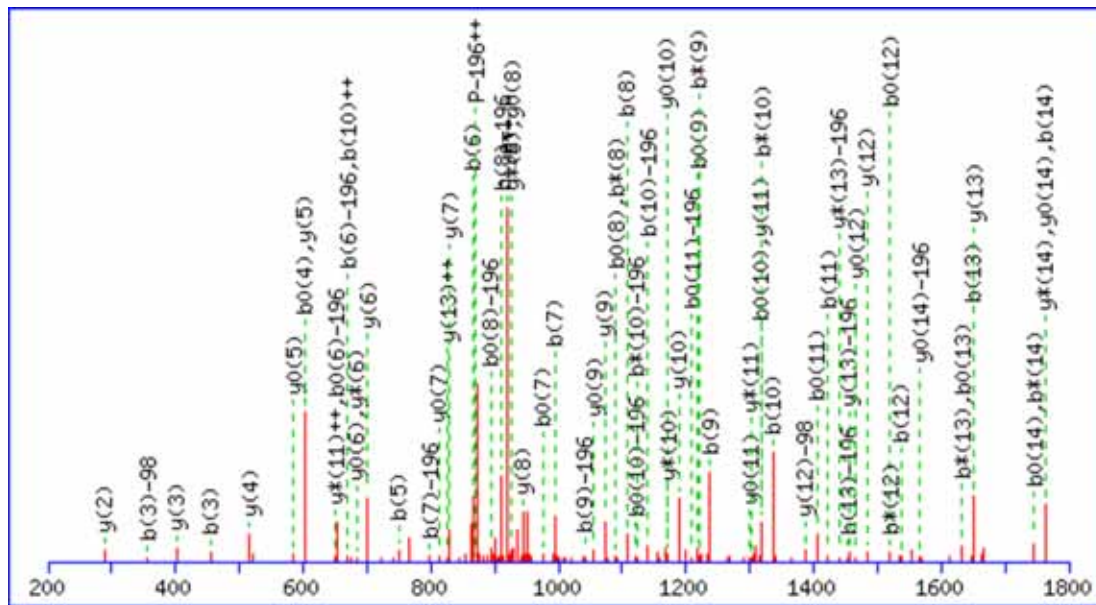

**Monoisotopic mass of neutral peptide Mr(calc):** 1936.7340

**Fixed modifications:** Carbamidomethyl (C) (apply to specified residues or termini only)

**Variable modifications:**

**N-term :** Dimethyl (N-term)

**S3 :** Phospho (ST), with neutral losses 0.0000(shown in table), 97.9769

**S4 :** Phospho (ST), with neutral losses 0.0000(shown in table), 97.9769

**Ions Score:** 82 **Expect:** 1.2e-007

**Matched b ions:** b(3)-98, b(3), b(4)-98, b(5)-98, b(5), b(6)-98, b(6), b(6)-196, b(7), b(7)-196, b(7)-98, b(8), b(8)-196, b(8)-98, b(9), b(9)-98, b(9)-196, b(10), b(10)-98, b(10)++, b(10)-196, b(11), b(12)-98, b(12), b(13)-98, b(13), b(13)-196, b(14), b(14)-98

**Matched y ions:** y(2), y(3), y(4), y(5), y(6), y(7), y(8), y(9), y(10), y(11), y(12), y(12)-98, y(13), y(13)-196, y(13)++

**Precursor origin neutral loss:** +

## Peptide No.191

**EESSEDENEVSNILR**

**Confirmed sites:** @S:3,@S:4

**Ambiguous sites:**

MS/MS Fragmentation of **EESSEDENEVSNILR**

Found in **OTUD4\_MOUSE**, OTU domain-containing protein 4 OS=Mus musculus GN=Otud4 PE=1 SV=1

Match to Query 4286: 1942.768394 from(972.391473,2+)

Title: Elution from: 56.571 to 56.571 scan no 5151 cid35.00 polarity:+:MA10:m1s



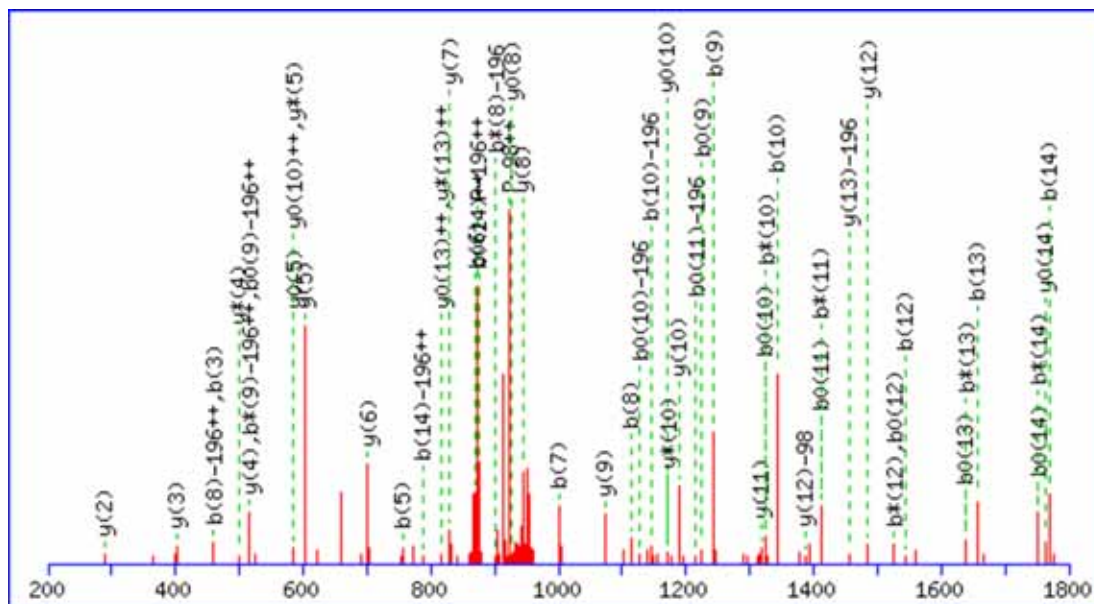

**Monoisotopic mass of neutral peptide Mr(calc):** 1942.7658

**Fixed modifications:** Carbamidomethyl (C) (apply to specified residues or termini only)

**Variable modifications:**

**N-term :** Dimethyl:2H(4)13C(2) (N-term)

**S3 :** Phospho (ST), with neutral losses 0.0000(shown in table), 97.9769

**S4 :** Phospho (ST), with neutral losses 0.0000(shown in table), 97.9769

**Ions Score:** 55 **Expect:** 7.6e-005

**Matched b ions:** b(3), b(5)-98, b(5), b(6)-98, b(6), b(7), b(7)-98, b(8)-196++, b(8), b(9), b(9)-98, b(10), b(10)-196, b(10)-98, b(10)-98++, b(12), b(13), b(13)-98, b(14), b(14)-196++

**Matched y ions:** y(2), y(3), y(4), y(5), y(6), y(7), y(8), y(9), y(10), y(11), y(12), y(12)-98, y(13)-196

**Precursor origin neutral loss:** +

## Peptide No.192

**EFDELSPAQR**

**Confirmed sites:** @S:8

**Ambiguous sites:**

MS/MS Fragmentation of **EFDELSPAQR**

Found in **AT2A2\_MOUSE**, Sarcoplasmic/endoplasmic reticulum calcium ATPase 2 OS=Mus musculus  
GN=Atp2a2 PE=1 SV=2

Match to Query 1507: 1385.586986 from(693.800769,2+)

Title: Elution from: 39.240 to 39.240 scan no 3369 cid35.00 polarity:+:MA10

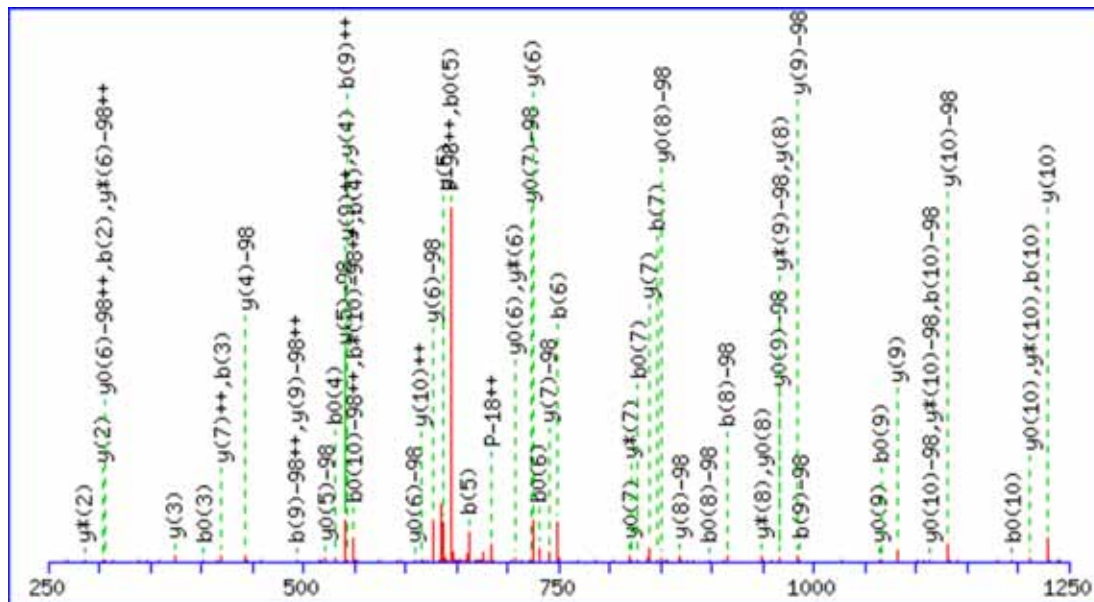

**Monoisotopic mass of neutral peptide Mr(calc):** 1385.5864

**Fixed modifications:** Carbamidomethyl (C) (apply to specified residues or termini only)

**Variable modifications:**

**N-term :** Dimethyl (N-term)

**S8 :** Phospho (ST), with neutral losses 97.9769(shown in table), 0.0000

**Ions Score:** 73 **Expect:** 1e-006

**Matched b ions:** b(2), b(3), b(4), b(5), b(6), b(7), b(8)-98, b(9)-98, b(9)++, b(9)-98++, b(10), b(10)-98

**Matched y ions:** y(2), y(3), y(4)-98, y(4), y(5)-98, y(5), y(6), y(6)-98, y(7), y(7)++, y(7)-98, y(8)-98, y(8), y(9)-98, y(9), y(9)++, y(9)-98++, y(10)-98, y(10), y(10)++

**Precursor origin neutral loss:** +

## Peptide No.193

**EFDELSPAQR**

**Confirmed sites:** @S:8

**Ambiguous sites:**

**MS/MS Fragmentation of EFDELSPAQR**

Found in **AT2A2\_MOUSE**, Sarcoplasmic/endoplasmic reticulum calcium ATPase 2 OS=Mus musculus  
GN=Atp2a2 PE=1 SV=2

Match to Query 1802: 1391.618470 from(696.816511,2+)

Title: Elution from: 39.282 to 39.282 scan no 3409 cid35.00 polarity:+:MA10

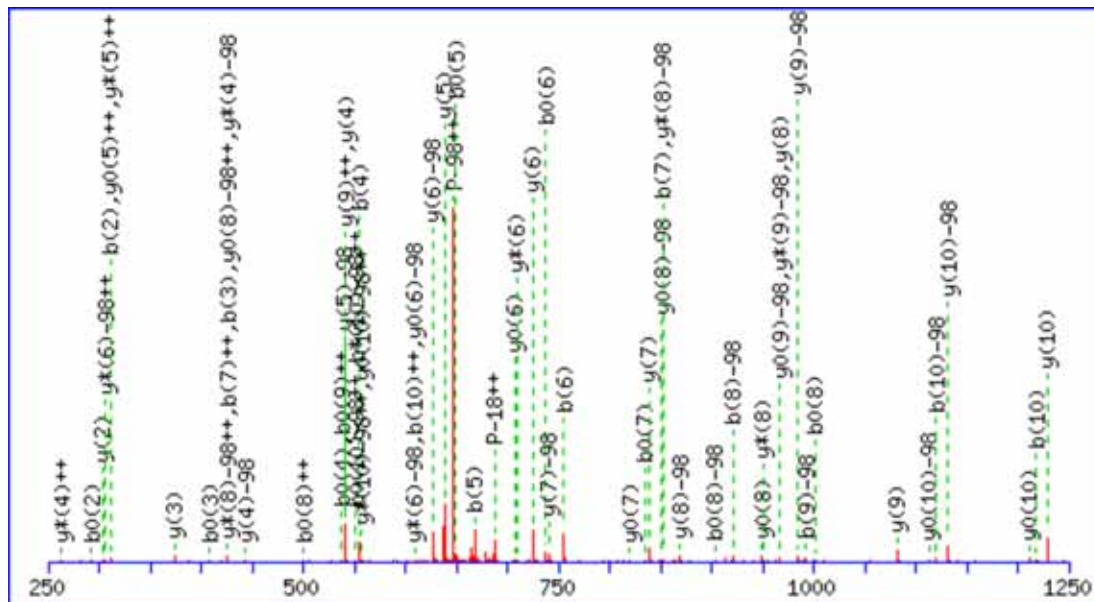

**Monoisotopic mass of neutral peptide Mr(calc):** 1391.6182

**Fixed modifications:** Carbamidomethyl (C) (apply to specified residues or termini only)

**Variable modifications:**

**N-term :** Dimethyl:2H(4)13C(2) (N-term)

**S8 :** Phospho (ST), with neutral losses 97.9769(shown in table), 0.0000

**Ions Score:** 72 **Expect:** 1.7e-006

**Matched b ions:** b(2), b(3), b(4), b(5), b(6), b(7)++, b(7), b(8)-98, b(9)-98, b(10)-98, b(10), b(10)++

**Matched y ions:** y(2), y(3), y(4)-98, y(4), y(5)-98, y(5), y(6), y(6)-98, y(7), y(7)-98, y(8)-98, y(8),

y(9)-98, y(9), y(9)++, y(10)-98, y(10)

**Precursor origin neutral loss:** +

## Peptide No.194

**EFITGDVEPTDAESAWHSENEEDK**

**Confirmed sites:** @S:18

**Ambiguous sites:**

MS/MS Fragmentation of **EFITGDVEPTDAESAWHSENEEDK**

Found in **NP1L4\_MOUSE**, Nucleosome assembly protein 1-like 4 OS=Mus musculus GN=Nap114 PE=1 SV=1

Match to Query 7563: 2999.223180 from(1000.748336,3+)

Title: Elution from: 50.555 to 50.555 scan no 4810 cid35.00 polarity:+:MA10:m1s

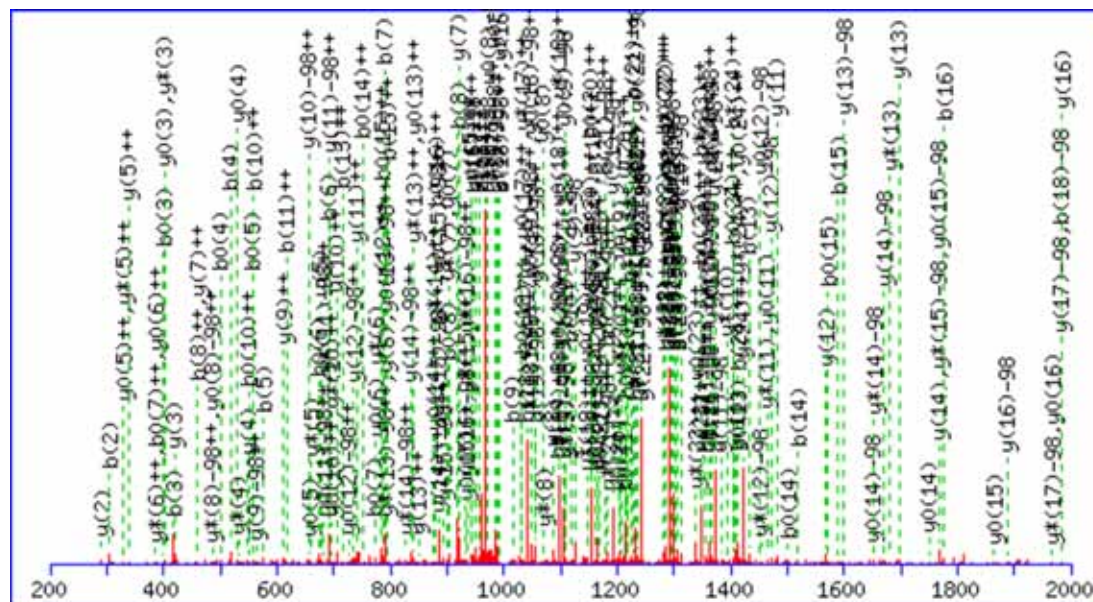

**Monoisotopic mass of neutral peptide Mr(calc):** 2999.2233

**Fixed modifications:** Carbamidomethyl (C) (apply to specified residues or termini only)

**Variable modifications:**

**N-term :** Dimethyl (N-term)

**S18 :** Phospho (ST), with neutral losses 97.9769(shown in table), 0.0000

**K25 :** Dimethyl (K)

**Ions Score:** 78 **Expect:** 8.4e-007

**Matched b ions:** b(2), b(3), b(4), b(5), b(6), b(7), b(8), b(8)++, b(9), b(10)++, b(10), b(11), b(11)++, b(12), b(13), b(13)++, b(14), b(15), b(15)++, b(16), b(17)++, b(18)++, b(18)-98++, b(18)-98, b(19)-98++, b(19)++, b(20)++, b(21)-98++, b(21)++, b(22)-98++, b(22)++, b(23)-98++, b(23)++, b(24)++, b(24)-98++

**Matched y ions:** y(2), y(3), y(4), y(5)++, y(5), y(6), y(7), y(7)++, y(8), y(8)-98, y(9)++, y(9)-98, y(9)-98++, y(9), y(10)-98++, y(10)++, y(10), y(10)-98, y(11)++, y(11)-98++, y(11), y(11)-98, y(12), y(12)++, y(12)-98, y(12)-98++, y(13)-98, y(13), y(13)++, y(14)++, y(14), y(14)-98, y(14)-98++, y(15)-98++, y(15)++, y(16)-98, y(16), y(16)-98++, y(16)++, y(17)++, y(17)-98++, y(17)-98, y(18)-98++, y(18)++, y(19)++, y(19)-98++, y(20)++, y(20)-98++, y(21)++, y(21)-98++, y(22)-98++, y(22)++, y(23)-98++, y(23)++, y(24)++, y(24)-98++

**Precursor origin neutral loss:** +

## Peptide No.195

**EGEPTVYSDDEEPKDETAR**

**Confirmed sites:** @S:9

**Ambiguous sites:**

MS/MS Fragmentation of **EGEPTVYSDDEEPKDETAR**

Found in **PGRC1\_MOUSE**, Membrane-associated progesterone receptor component 1 OS=Mus musculus GN=Pgrmc1 PE=1 SV=4

Match to Query 7853: 2430.995868 from(811.339232,3+)

Title: Elution from: 32.058 to 32.058 scan no 2507 cid35.00 polarity:+:MA10:m1s



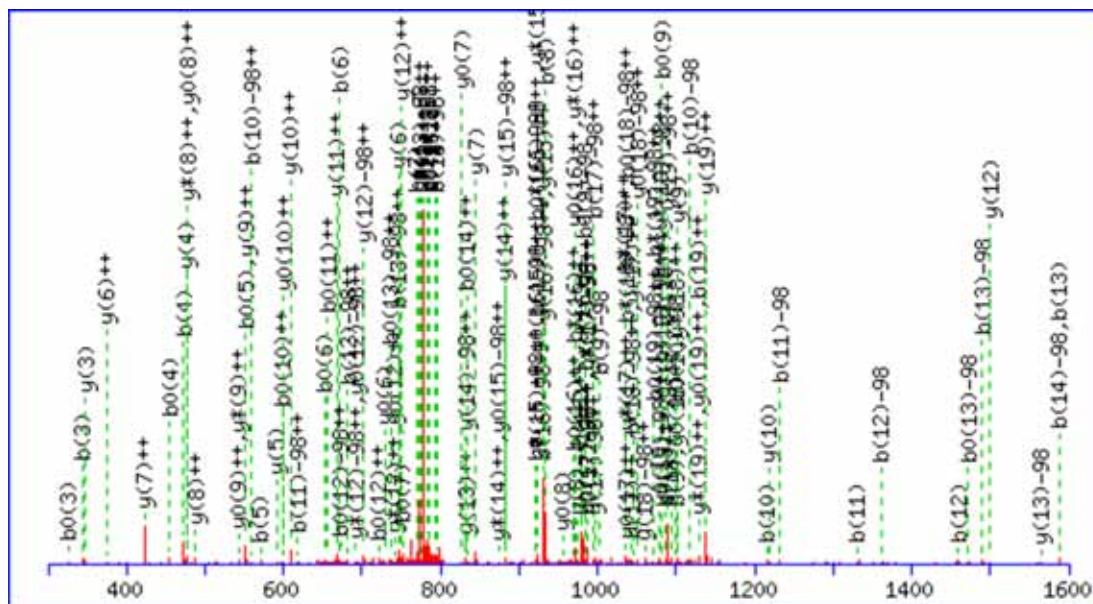

**Monoisotopic mass of neutral peptide Mr(calc):** 2430.9951

**Fixed modifications:** Carbamidomethyl (C) (apply to specified residues or termini only)

**Variable modifications:**

**N-term :** Dimethyl (N-term)

**S9 :** Phospho (ST), with neutral losses 97.9769(shown in table), 0.0000

**K15 :** Dimethyl (K)

**Ions Score:** 77 **Expect:** 9.7e-007

**Matched b ions:** b(3), b(4), b(5), b(6), b(7), b(8), b(9)-98, b(9), b(10), b(10)-98, b(10)-98++, b(11)-98, b(11), b(11)-98++, b(12), b(12)-98, b(12)-98++, b(13)-98, b(13), b(13)-98++, b(13)++, b(14)-98, b(14)-98++, b(15)++, b(16)-98++, b(16)++, b(17)++, b(17)-98++, b(18)-98++, b(18)++, b(19)++, b(19)-98++

**Matched y ions:** y(3), y(4), y(5), y(6)++, y(6), y(7)++, y(7), y(8)++, y(8), y(9)++, y(9), y(10)++, y(10), y(11)++, y(12)-98++, y(12), y(12)++, y(13)-98, y(13)-98++, y(13)++, y(14)-98++, y(14)++, y(15)++, y(15)-98++, y(16)-98++, y(16)++, y(17)-98++, y(17)++, y(18)-98++, y(19)-98++, y(19)++

**Precursor origin neutral loss:** +

## Peptide No.196

**EGEPTVYSDDEEPKDETAR**

**Confirmed sites:** @S:9

**Ambiguous sites:**

MS/MS Fragmentation of **EGEPTVYSDDEEPKDETAR**

Found in **PGRC1\_MOUSE**, Membrane-associated progesterone receptor component 1 OS=Mus musculus GN=Pgrmc1 PE=1 SV=4

Match to Query 6183: 2443.061124 from(815.360984,3+)

Title: Elution from: 32.022 to 32.022 scan no 2371 cid35.00 polarity:+:MA10:m1s



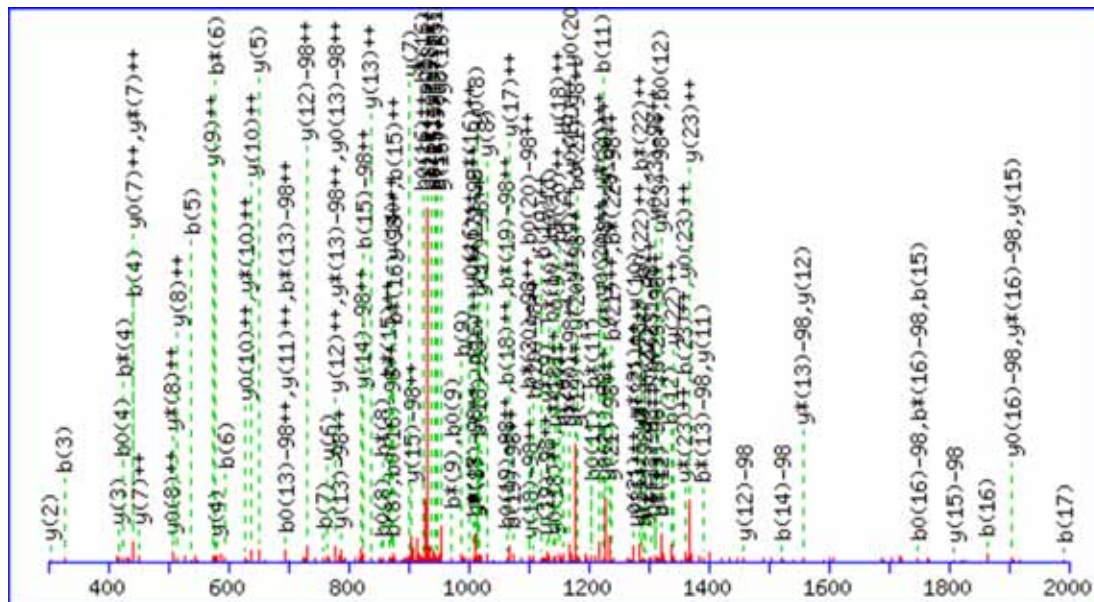

**Monoisotopic mass of neutral peptide Mr(calc):** 2894.1192

**Fixed modifications:** Carbamidomethyl (C) (apply to specified residues or termini only)

**Variable modifications:**

**N-term :** Dimethyl (N-term)

**S13 :** Phospho (ST), with neutral losses 97.9769(shown in table), 0.0000

**Ions Score:** 75 **Expect:** 1.2e-006

**Matched b ions:** b(3), b(4), b(5), b(6), b(7), b(8), b(9), b(11), b(12), b(14)-98, b(15), b(15)-98++, b(15)++, b(16)++, b(16), b(17), b(17)-98++, b(18)-98++, b(18)++, b(19)-98++, b(19)++, b(20)++, b(20)-98++, b(21)++, b(22)++, b(23)++, b(23)-98++

**Matched y ions:** y(2), y(3), y(4), y(5), y(6), y(7)++, y(7), y(8), y(8)++, y(9)++, y(9), y(10)++, y(10), y(11)++, y(11), y(12)-98++, y(12)-98, y(12)++, y(12), y(13)-98++, y(13)++, y(14)-98++, y(14)++, y(15), y(15)++, y(15)-98++, y(15)-98, y(16)++, y(17)++, y(17)-98++, y(18)++, y(18)-98++, y(19)++, y(19)-98++, y(20)-98++, y(20)++, y(21)-98++, y(21)++, y(22)-98++, y(22)++, y(23)++, y(23)-98++

**Precursor origin neutral loss:** +

## Peptide No.198

**EHRCSSSDDDDTDVDVEGLR**

**Confirmed sites:** @S:5,@S:6,@S:7

**Ambiguous sites:**

MS/MS Fragmentation of **EHRCSSSDDDDTDVDVEGLR**

Found in **PBIP1\_MOUSE**, Pre-B-cell leukemia transcription factor-interacting protein 1 OS=Mus musculus GN=Pbxip1 PE=1 SV=2

Match to Query 6461: 2458.841718 from(820.621182,3+)

Title: Elution from: 39.567 to 39.567 scan no 3415 cid35.00 polarity:+:MA10:m1s



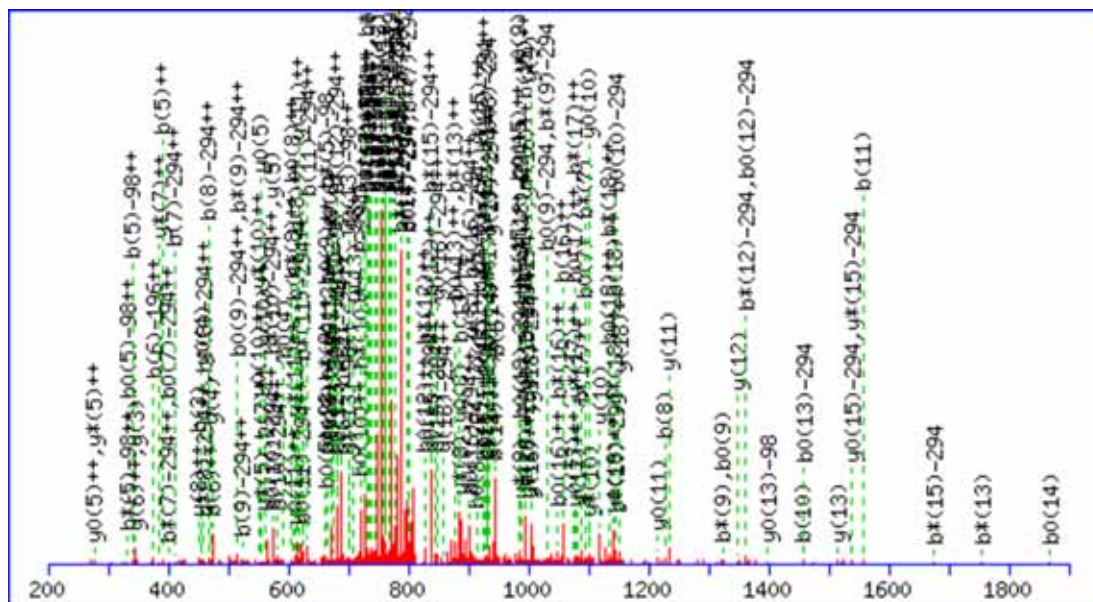

**Monoisotopic mass of neutral peptide Mr(calc):** 2458.8387

**Fixed modifications:** Carbamidomethyl (C) (apply to specified residues or termini only)

**Variable modifications:**

**N-term :** Dimethyl (N-term)

**S5 :** Phospho (ST), with neutral losses 0.0000(shown in table), 97.9769

**S6 :** Phospho (ST), with neutral losses 0.0000(shown in table), 97.9769

**S7 :** Phospho (ST), with neutral losses 0.0000(shown in table), 97.9769

**Ions Score:** 53 **Expect:** 5.4e-005

**Matched b ions:** b(3), b(4), b(5)-98++, b(5)++, b(5)-98, b(5), b(6)-196++, b(6)-196, b(6)-98++, b(6)++, b(6)-98, b(6), b(7)-196++, b(7)-294++, b(7)-98++, b(7)++, b(7)-196, b(7)-98, b(8)-294++, b(8)-98++, b(8)-196++, b(8)++, b(8)-98, b(8), b(8)-294, b(8)-196, b(9)++, b(9)-196++, b(9)-98++, b(9)-294++, b(9)-196, b(10), b(10)-196++, b(10)++, b(10)-98++, b(10)-294++, b(11)-196, b(11)-98, b(11), b(11)++, b(11)-294++, b(11)-196++, b(11)-98++, b(12)-98++, b(12)++, b(12)-294++, b(12)-196++, b(13)-196++, b(13)++, b(13)-98++, b(13)-294++, b(14)++, b(14)-98++, b(14)-294++, b(14)-196++, b(15)-98++, b(15)++, b(15)-196++, b(15)-294++, b(16)++, b(16)-98++, b(16)-196++, b(17)++, b(17)-196++, b(17)-98++, b(18)++, b(18)-294++, b(18)-196++, b(18)-98++

**Matched y ions:** y(3), y(4), y(5), y(6)++, y(6), y(7), y(8)++, y(8), y(9), y(10), y(10)++, y(11), y(11)++, y(12), y(12)++, y(13), y(13)++, y(13)-98++, y(14)-196++, y(14)-98++, y(15)-294++, y(15)-196++, y(15)-98++, y(15)++, y(16)++, y(16)-294++, y(16)-196++, y(17)-196++, y(17)++, y(17)-294++, y(17)-98++, y(18)++, y(18)-294++, y(18)-98++, y(18)-196++

**Precursor origin neutral loss:** +

## Peptide No.199

**EITALAPSTMK**

**Confirmed sites:** @S:8

**Ambiguous sites:**

MS/MS Fragmentation of **EITALAPSTMK**

Found in **ACTS\_MOUSE**, Actin, alpha skeletal muscle OS=Mus musculus GN=Acta1 PE=1 SV=1



Match to Query 1165: 1312.636520 from(657.325536,2+)

Title: Elution from: 34.407 to 34.407 scan no 2689 cid35.00 polarity:+:MA10

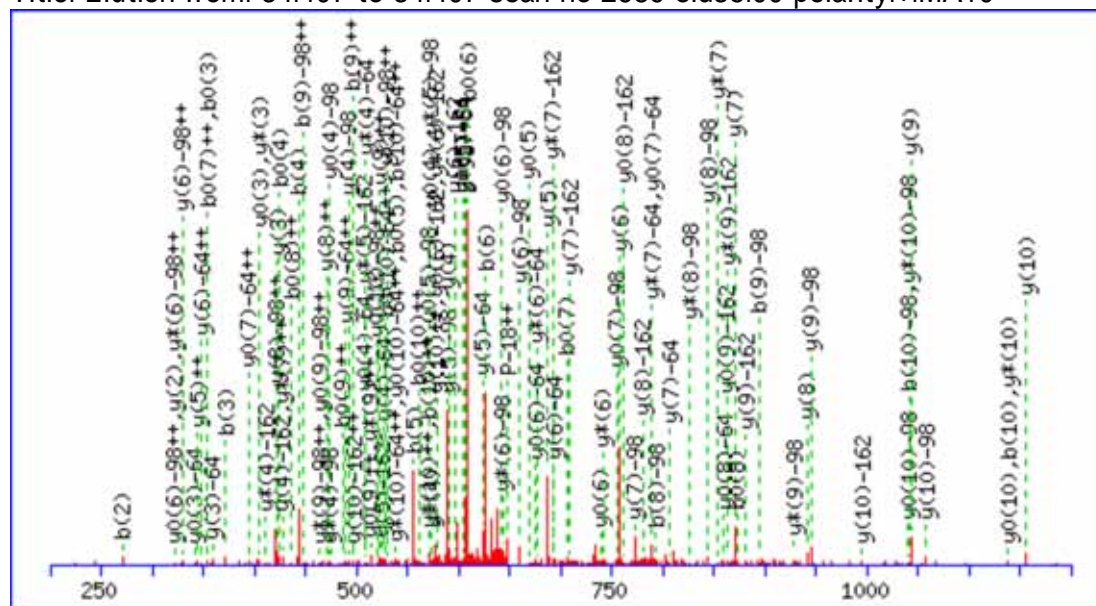

**Monoisotopic mass of neutral peptide Mr(calc):** 1312.6349

**Fixed modifications:** Carbamidomethyl (C) (apply to specified residues or termini only)

**Variable modifications:**

**N-term :** Dimethyl (N-term)

**S8 :** Phospho (ST), with neutral losses 0.0000(shown in table), 97.9769

**M10 :** Oxidation (M), with neutral losses 0.0000(shown in table), 63.9983

**K11 :** Dimethyl (K)

**Ions Score:** 43 **Expect:** 0.0014

**Matched b ions:** b(2), b(3), b(4), b(5), b(6), b(8)-98, b(9)-98++, b(9)++, b(9)-98, b(10), b(10)-98, b(10)++

**Matched y ions:** y(2), y(3), y(4)-98, y(4), y(5)-98, y(5), y(5)++, y(6), y(6)-98++, y(6)-98, y(7), y(7)-98,

y(8)-98++, y(8)-98, y(8), y(8)++, y(9)-98, y(9), y(9)++, y(10), y(10)-98, y(10)-98++, y(10)++

**Precursor origin neutral loss:** +

## Peptide No.200

**EITALAPSTMK**

**Confirmed sites:** @T:9

**Ambiguous sites:**

**MS/MS Fragmentation of EITALAPSTMK**

Found in **ACTS\_MOUSE**, Actin, alpha skeletal muscle OS=Mus musculus GN=Acta1 PE=1 SV=1

Match to Query 1511: 1312.634954 from(657.324753,2+)

Title: Elution from: 34.324 to 34.324 scan no 2728 cid35.00 polarity:+:MA10

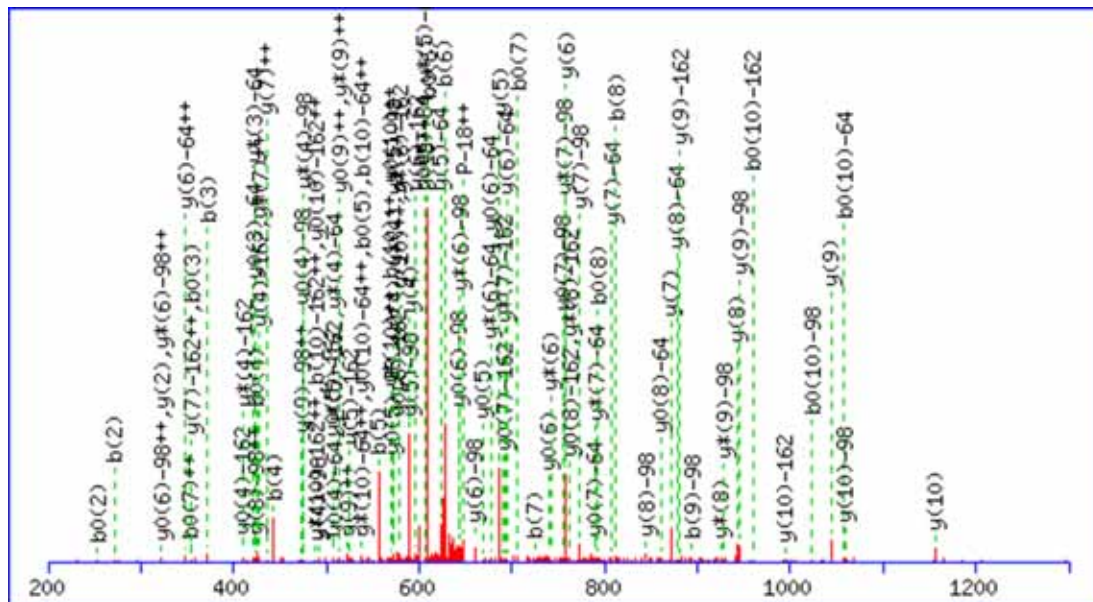

**Monoisotopic mass of neutral peptide Mr(calc):** 1312.6349

**Fixed modifications:** Carbamidomethyl (C) (apply to specified residues or termini only)

**Variable modifications:**

**N-term :** Dimethyl (N-term)

**T9 :** Phospho (ST), with neutral losses 0.0000(shown in table), 97.9769

**M10 :** Oxidation (M), with neutral losses 0.0000(shown in table), 63.9983

**K11 :** Dimethyl (K)

**Ions Score:** 50 **Expect:** 0.00032

**Matched b ions:** b(2), b(3), b(4), b(5), b(6), b(7), b(8), b(9)-98, b(10)++

**Matched y ions:** y(2), y(4)-98, y(4), y(5), y(5)-98, y(6), y(6)-98, y(7), y(7)-98, y(7)++, y(8), y(8)-98, y(8)-98++, y(9), y(9)++, y(9)-98, y(9)-98++, y(10), y(10)-98, y(10)++

**Precursor origin neutral loss:** +

## Peptide No.201

**EITALAPSTMK**

**Confirmed sites:** @S:8

**Ambiguous sites:**

**MS/MS Fragmentation of EITALAPSTMK**

Found in **ACTA\_MOUSE**, Actin, aortic smooth muscle OS=Mus musculus GN=Acta2 PE=1 SV=1

Match to Query 1387: 1296.640212 from(649.327382,2+)

Title: Elution from: 42.720 to 42.720 scan no 3844 cid35.00 polarity:+:MA10

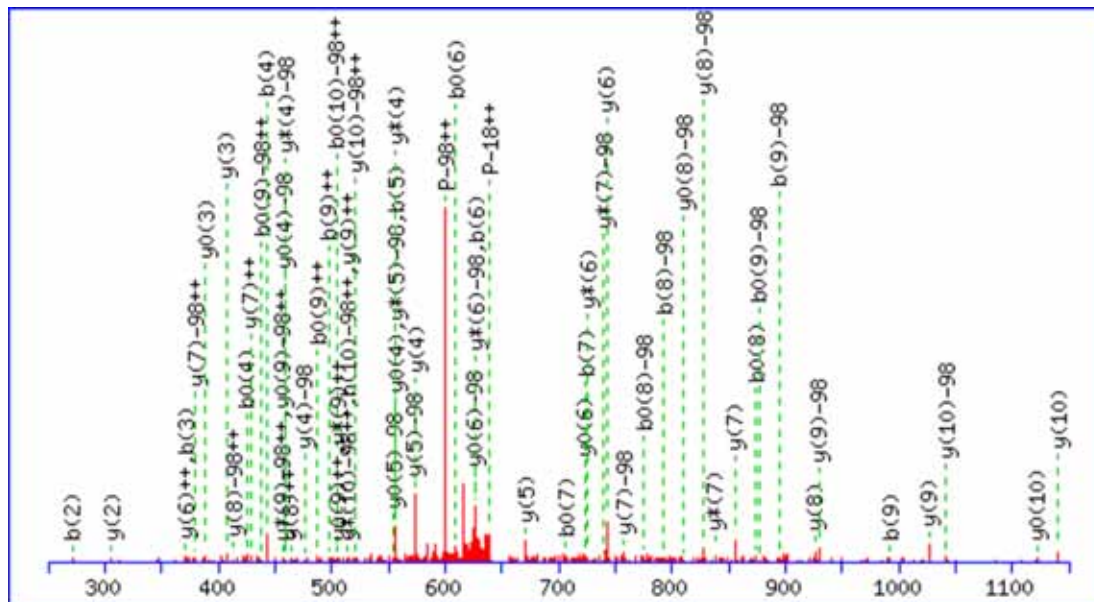

**Monoisotopic mass of neutral peptide Mr(calc):** 1296.6400

**Fixed modifications:** Carbamidomethyl (C) (apply to specified residues or termini only)

**Variable modifications:**

**N-term :** Dimethyl (N-term)

**S8 :** Phospho (ST), with neutral losses 97.9769(shown in table), 0.0000

**K11 :** Dimethyl (K)

**Ions Score:** 45 **Expect:** 0.0011

**Matched b ions:** b(2), b(3), b(4), b(5), b(6), b(7), b(8)-98, b(9), b(9)-98, b(9)++, b(10)-98++

**Matched y ions:** y(2), y(3), y(4)-98, y(4), y(5)-98, y(5), y(6), y(6)++, y(7), y(7)-98, y(7)++, y(7)-98++, y(8)-98, y(8), y(8)-98++, y(8)++, y(9)-98, y(9), y(9)++, y(10), y(10)-98, y(10)-98++

**Precursor origin neutral loss:** +

## Peptide No.202

**EITALAPSTMK**

**Confirmed sites:** @T:9

**Ambiguous sites:**

MS/MS Fragmentation of **EITALAPSTMK**

Found in **ACTA\_MOUSE**, Actin, aortic smooth muscle OS=Mus musculus GN=Acta2 PE=1 SV=1

Match to Query 1020: 1296.641112 from(649.327832,2+)

Title: Elution from: 42.848 to 42.848 scan no 3739 cid35.00 polarity:+:MA10





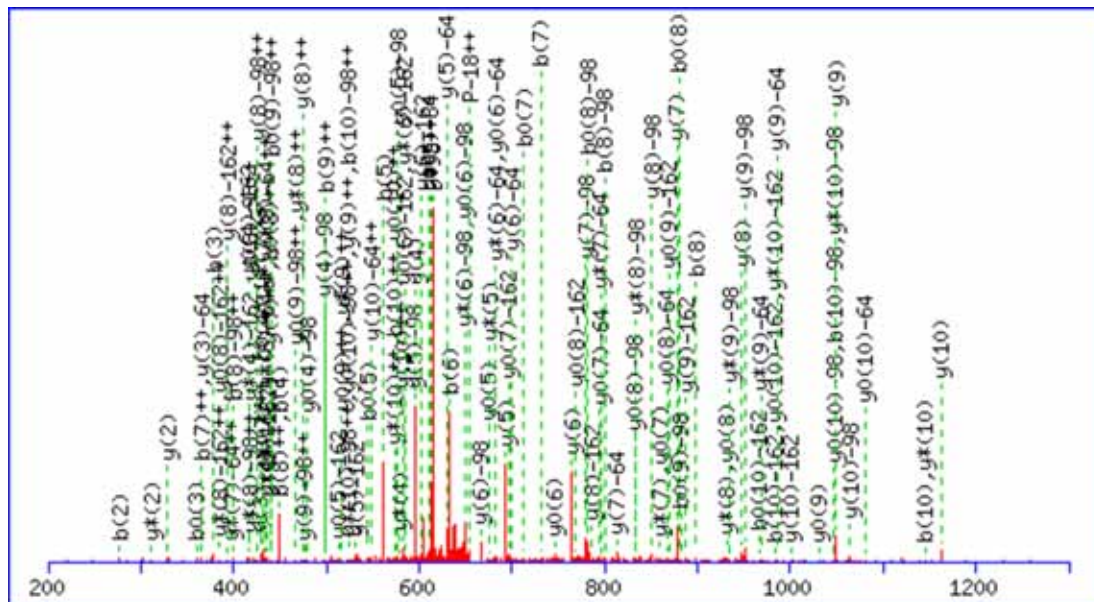

**Monoisotopic mass of neutral peptide Mr(calc):** 1324.6985

**Fixed modifications:** Carbamidomethyl (C) (apply to specified residues or termini only)

**Variable modifications:**

**N-term :** Dimethyl:2H(4)13C(2) (N-term)

**S8 :** Phospho (ST), with neutral losses 0.0000(shown in table), 97.9769

**M10 :** Oxidation (M), with neutral losses 0.0000(shown in table), 63.9983

**K11 :** Dimethyl:2H(4)13C(2) (K)

**Ions Score:** 42 **Expect:** 0.0024

**Matched b ions:** b(2), b(3), b(4), b(5), b(6), b(7)++, b(7), b(8)++, b(8)-98++, b(8), b(8)-98, b(9)++, b(10)-98, b(10), b(10)-98++, b(10)++

**Matched y ions:** y(2), y(3), y(4), y(4)-98, y(5)-98, y(5), y(6), y(6)-98, y(7), y(7)-98, y(7)++, y(8)-98, y(8), y(8)-98++, y(8)++, y(9)-98, y(9), y(9)-98++, y(9)++, y(10), y(10)-98, y(10)++

**Precursor origin neutral loss:** +

## Peptide No.204

**EITALAPSTMK**

**Confirmed sites:**

**Ambiguous sites:** @S:8orT:9

**MS/MS Fragmentation of EITALAPSTMK**

Found in **ACTS\_MOUSE**, Actin, alpha skeletal muscle OS=Mus musculus GN=Acta1 PE=1 SV=1

Match to Query 1197: 1324.699438 from(663.356995,2+)

Title: Elution from: 34.387 to 34.387 scan no 2686 cid35.00 polarity:+:MA10

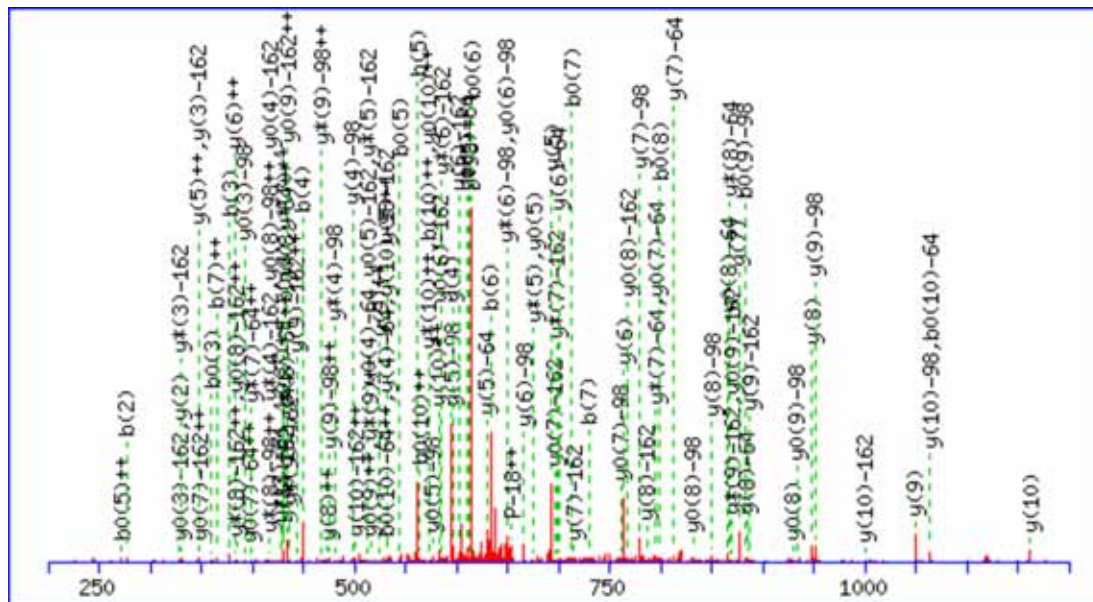

**Monoisotopic mass of neutral peptide Mr(calc):** 1324.6985

**Fixed modifications:** Carbamidomethyl (C) (apply to specified residues or termini only)

**Variable modifications:**

**N-term :** Dimethyl:2H(4)13C(2) (N-term)

**T9 :** Phospho (ST), with neutral losses 0.0000(shown in table), 97.9769

**M10 :** Oxidation (M), with neutral losses 0.0000(shown in table), 63.9983

**K11 :** Dimethyl:2H(4)13C(2) (K)

**Ions Score:** 41 **Expect:** 0.0031

**Matched b ions:** b(2), b(3), b(4), b(5), b(6), b(7)++, b(7), b(10)++

**Matched y ions:** y(2), y(4), y(4)-98, y(5)-98, y(5), y(5)++, y(6), y(6)++, y(6)-98, y(7), y(7)-98, y(8), y(8)-98, y(8)++, y(9)-98, y(9), y(9)-98++, y(9)++, y(10), y(10)-98, y(10)++, y(10)-98++

**Precursor origin neutral loss:** +

## Peptide No.205

**ELSQVLTQR**

**Confirmed sites:** @S:3

**Ambiguous sites:**

**MS/MS Fragmentation of ELSQVLTQR**

Found in **CAPZB\_MOUSE**, F-actin-capping protein subunit beta OS=Mus musculus GN=Capzb PE=1 SV=3

Match to Query 880: 1180.586054 from(591.300303,2+)

Title: Elution from: 42.317 to 42.317 scan no 3780 cid35.00 polarity:+:MA10

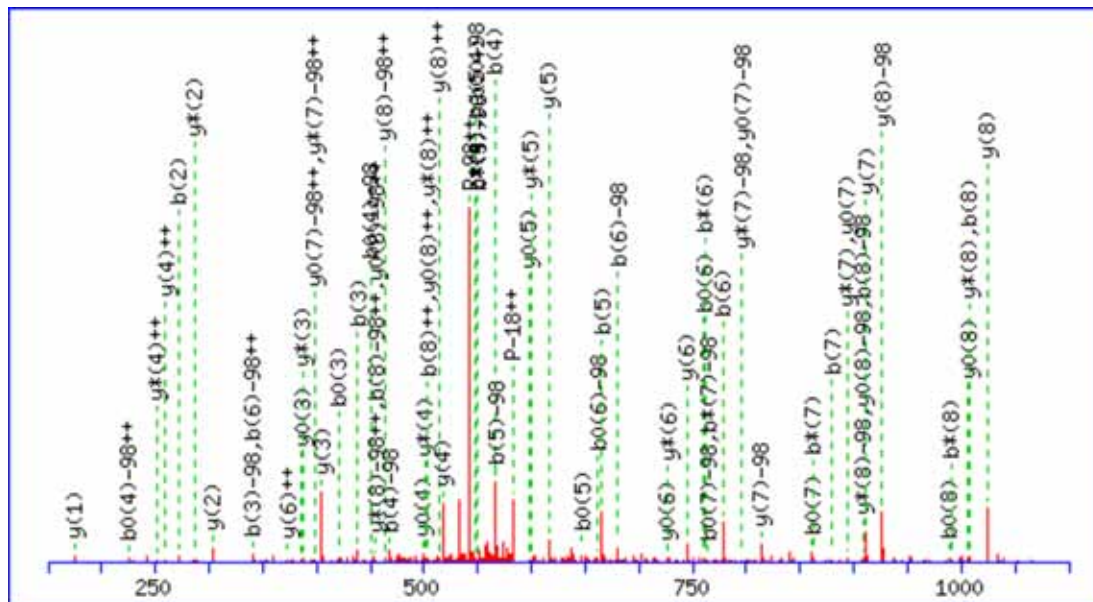

**Monoisotopic mass of neutral peptide Mr(calc):** 1180.5853

**Fixed modifications:** Carbamidomethyl (C) (apply to specified residues or termini only)

**Variable modifications:**

**N-term :** Dimethyl (N-term)

**S3 :** Phospho (ST), with neutral losses 97.9769(shown in table), 0.0000

**Ions Score:** 58 **Expect:** 6.1e-005

**Matched b ions:** b(2), b(3)-98, b(3), b(4)-98, b(4), b(5), b(5)-98, b(6), b(6)-98++, b(6)-98, b(7), b(8), b(8)-98, b(8)-98++, b(8)++

**Matched y ions:** y(1), y(2), y(3), y(4), y(4)++, y(5), y(6), y(6)++, y(7)-98, y(7), y(8)-98, y(8), y(8)-98++, y(8)++

**Precursor origin neutral loss:** +

## Peptide No.206

**ELSQVLTQR**

**Confirmed sites:** @S:3

**Ambiguous sites:**

MS/MS Fragmentation of **ELSQVLTQR**

Found in **CAPZB\_MOUSE**, F-actin-capping protein subunit beta OS=Mus musculus GN=Capzb PE=1 SV=3

Match to Query 998: 1186.617896 from(594.316224,2+)

Title: Elution from: 42.175 to 42.175 scan no 3770 cid35.00 polarity:+:MA10

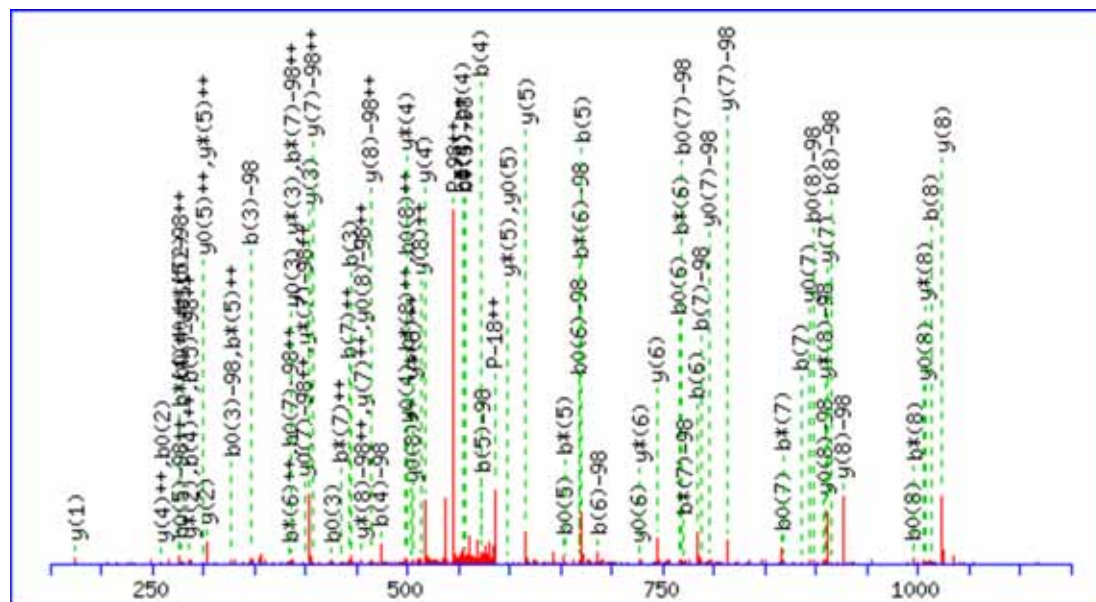

**Monoisotopic mass of neutral peptide Mr(calc):** 1186.6171

**Fixed modifications:** Carbamidomethyl (C) (apply to specified residues or termini only)

**Variable modifications:**

**N-term :** Dimethyl:2H(4)13C(2) (N-term)

**S3 :** Phospho (ST), with neutral losses 97.9769(shown in table), 0.0000

**Ions Score:** 50 **Expect:** 0.00038

**Matched b ions:** b(2), b(3), b(3)-98, b(4)-98, b(4)++, b(4), b(5), b(5)-98++, b(5)-98, b(6), b(6)-98, b(7)++, b(7)-98, b(7), b(8), b(8)-98

**Matched y ions:** y(1), y(2), y(3), y(4), y(4)++, y(5), y(6), y(7)-98, y(7), y(7)++, y(7)-98++, y(8)-98, y(8), y(8)-98++, y(8)++

**Precursor origin neutral loss:** +

## Peptide No.207

**ELVEPESPTEEQEQGK**

**Confirmed sites:** @S:7

**Ambiguous sites:**

MS/MS Fragmentation of **ELVEPESPTEEQEQGK**

Found in **SMTL1\_MOUSE**, Smoothelin-like protein 1 OS=Mus musculus GN=Smtnl1 PE=1 SV=1

Match to Query 5442: 1963.866434 from(982.940493,2+)

Title: Elution from: 33.723 to 33.723 scan no 2813 cid35.00 polarity:+:MA10



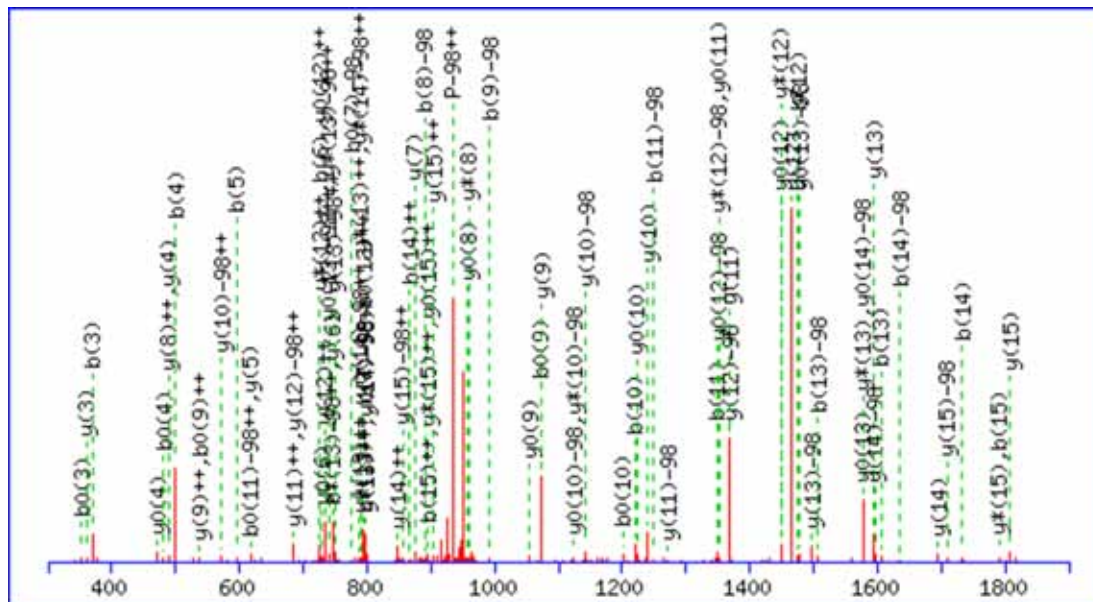

**Monoisotopic mass of neutral peptide Mr(calc):** 1963.8663

**Fixed modifications:** Carbamidomethyl (C) (apply to specified residues or termini only)

**Variable modifications:**

**N-term :** Dimethyl (N-term)

**S7 :** Phospho (ST), with neutral losses 97.9769(shown in table), 0.0000

**K16 :** Dimethyl (K)

**Ions Score:** 72 **Expect:** 3.3e-006

**Matched b ions:** b(3), b(4), b(5), b(6), b(7)-98, b(8)-98, b(9)-98, b(10), b(11), b(11)-98, b(12), b(13), b(13)-98, b(14), b(14)-98, b(14)++, b(15), b(15)++

**Matched y ions:** y(3), y(4), y(5), y(6), y(7), y(8)++, y(9), y(9)++, y(10), y(10)-98++, y(10)-98, y(11)++, y(11)-98, y(11), y(12)++, y(12)-98, y(12), y(12)-98++, y(13), y(13)++, y(13)-98, y(13)-98++, y(14), y(14)-98++, y(14)-98, y(14)++, y(15), y(15)-98, y(15)++, y(15)-98++

**Precursor origin neutral loss:** +

## Peptide No.208

**ELVEPESPTEEQQGK**

**Confirmed sites:** @S:7

**Ambiguous sites:**

MS/MS Fragmentation of **ELVEPESPTEEQQGK**

Found in **SMTL1\_MOUSE**, Smoothelin-like protein 1 OS=Mus musculus GN=Smtnl1 PE=1 SV=1

Match to Query 5092: 1975.930366 from(988.972459,2+)

Title: Elution from: 33.630 to 33.630 scan no 2632 cid35.00 polarity:+:MA10

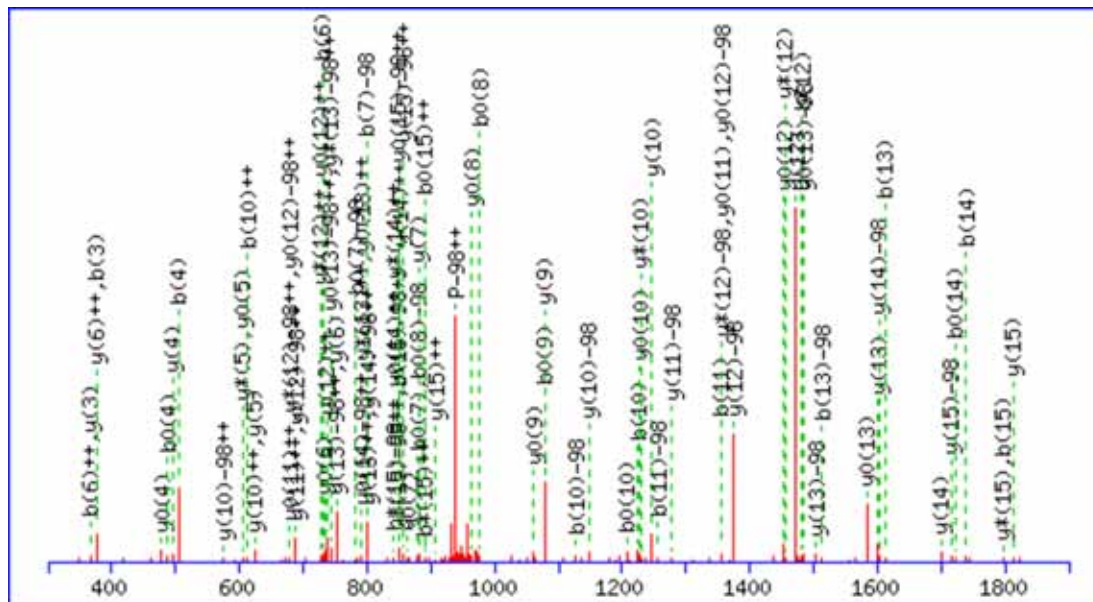

**Monoisotopic mass of neutral peptide Mr(calc):** 1975.9299

**Fixed modifications:** Carbamidomethyl (C) (apply to specified residues or termini only)

**Variable modifications:**

**N-term :** Dimethyl:2H(4)13C(2) (N-term)

**S7 :** Phospho (ST), with neutral losses 97.9769(shown in table), 0.0000

**K16 :** Dimethyl:2H(4)13C(2) (K)

**Ions Score:** 81 **Expect:** 4.8e-007

**Matched b ions:** b(3), b(4), b(6)++, b(6), b(7)-98, b(10), b(10)-98, b(10)++, b(11)-98, b(11), b(12), b(13), b(13)-98, b(14), b(15), b(15)-98++

**Matched y ions:** y(3), y(4), y(5), y(6)++, y(6), y(7), y(9), y(10)++, y(10), y(10)-98++, y(10)-98, y(11)++, y(11)-98, y(12)++, y(12)-98, y(12), y(12)-98++, y(13)-98++, y(13), y(13)++, y(13)-98, y(14), y(14)-98++, y(14)++, y(14)-98, y(15)-98, y(15), y(15)-98++, y(15)++

**Precursor origin neutral loss:** +

## Peptide No.209

**ELVEPESPTEEQQGK**

**Confirmed sites:** @T:9

**Ambiguous sites:**

**MS/MS Fragmentation of ELVEPESPTEEQQGK**

Found in **SMTL1\_MOUSE**, Smoothelin-like protein 1 OS=Mus musculus GN=Smtnl1 PE=1 SV=1

Match to Query 4886: 1975.930396 from(988.972474,2+)

Title: Elution from: 33.565 to 33.565 scan no 2586 cid35.00 polarity:+:MA10:m1s

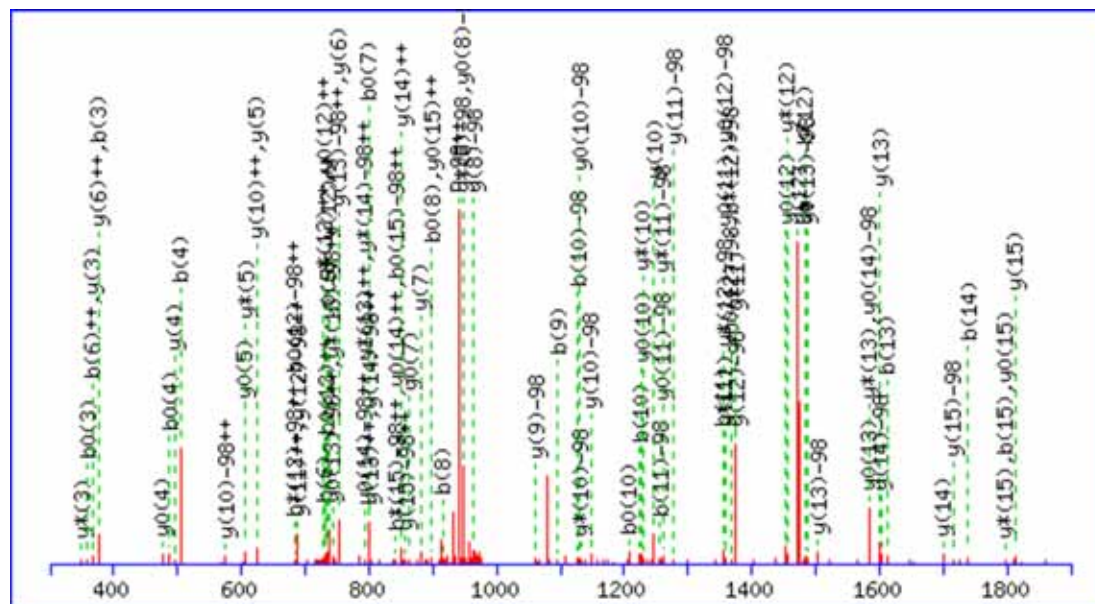

**Monoisotopic mass of neutral peptide Mr(calc):** 1975.9299

**Fixed modifications:** Carbamidomethyl (C) (apply to specified residues or termini only)

**Variable modifications:**

**N-term :** Dimethyl:2H(4)13C(2) (N-term)

**T9 :** Phospho (ST), with neutral losses 97.9769(shown in table), 0.0000

**K16 :** Dimethyl:2H(4)13C(2) (K)

**Ions Score:** 80 **Expect:** 7.1e-007

**Matched b ions:** b(3), b(4), b(6)++, b(6), b(8), b(9), b(10), b(10)-98, b(11)-98, b(11), b(12), b(13), b(14), b(15)

**Matched y ions:** y(3), y(4), y(5), y(6)++, y(6), y(7), y(8)-98, y(9)-98, y(10)++, y(10), y(10)-98++, y(10)-98, y(11)++, y(11), y(11)-98, y(12)++, y(12)-98, y(12), y(12)-98++, y(13)-98++, y(13)++, y(13), y(13)-98, y(14), y(14)-98++, y(14)-98, y(14)++, y(15), y(15)-98, y(15)-98++

**Precursor origin neutral loss:** +

## Peptide No.210

**ELVEPESPTEEQQGKENESEER**

**Confirmed sites:** @S:7

**Ambiguous sites:**

MS/MS Fragmentation of **ELVEPESPTEEQQGKENESEER**

Found in **SMTL1\_MOUSE**, Smoothelin-like protein 1 OS=Mus musculus GN=Smtnl1 PE=1 SV=1

Match to Query 7379: 2849.277885 from(950.766571,3+)

Title: Elution from: 32.632 to 32.632 scan no 2495 cid35.00 polarity:+:MA10:m1s

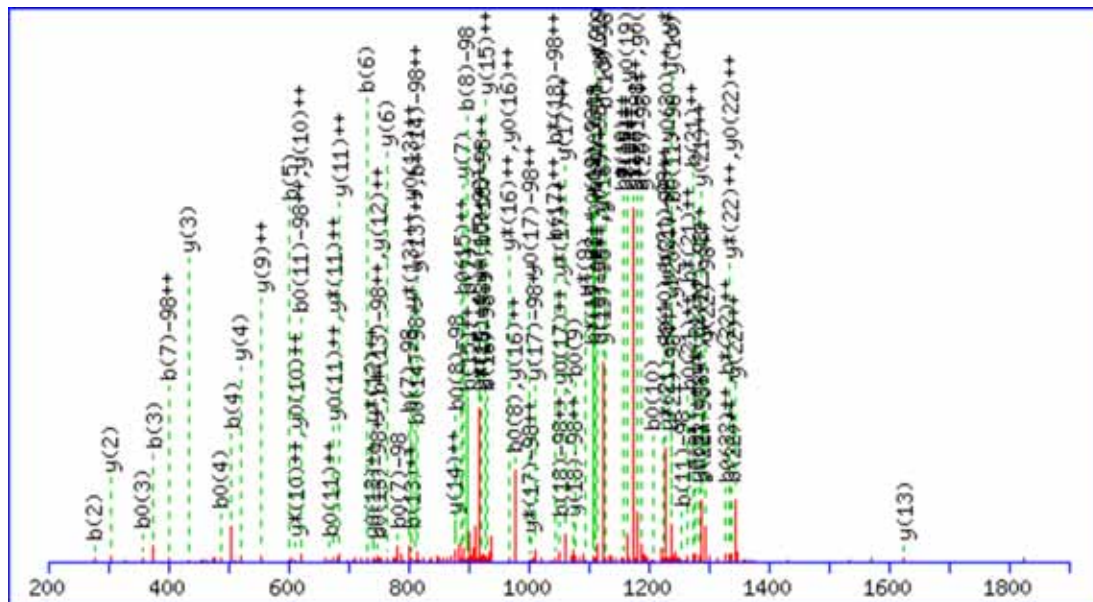

**Monoisotopic mass of neutral peptide Mr(calc):** 2849.2763

**Fixed modifications:** Carbamidomethyl (C) (apply to specified residues or termini only)

**Variable modifications:**

**N-term :** Dimethyl:2H(4)13C(2) (N-term)

**S7 :** Phospho (ST), with neutral losses 0.0000(shown in table), 97.9769

**K16 :** Dimethyl:2H(4)13C(2) (K)

**Ions Score:** 61 **Expect:** 7.1e-005

**Matched b ions:** b(2), b(3), b(4), b(5), b(6), b(7)-98, b(7)-98++, b(7), b(8)-98, b(10)-98, b(10), b(11)-98, b(13)++, b(15)++, b(16)-98++, b(17)++, b(18)-98++, b(19)-98++, b(19)++, b(21)++, b(21)-98++, b(22)-98++, b(22)++

**Matched y ions:** y(2), y(3), y(4), y(6), y(7), y(9)++, y(9), y(10)++, y(10), y(11)++, y(12)++, y(13), y(13)++, y(14)++, y(15)++, y(16)++, y(17)++, y(17)-98++, y(18)++, y(18)-98++, y(19)++, y(19)-98++, y(20)++, y(20)-98++, y(21)++, y(21)-98++, y(22)++, y(22)-98++

**Precursor origin neutral loss:** +

## Peptide No.211

**EMLASDDEEESP**K

**Confirmed sites:** @S:5

**Ambiguous sites:**

MS/MS Fragmentation of **EMLASDDEEESP**K

Found in **NEXN\_MOUSE**, Nexilin OS=Mus musculus GN=Nexn PE=1 SV=2

Match to Query 3846: 1717.664984 from(859.839768,2+)

Title: Elution from: 27.111 to 27.111 scan no 1909 cid35.00 polarity:+:MA10



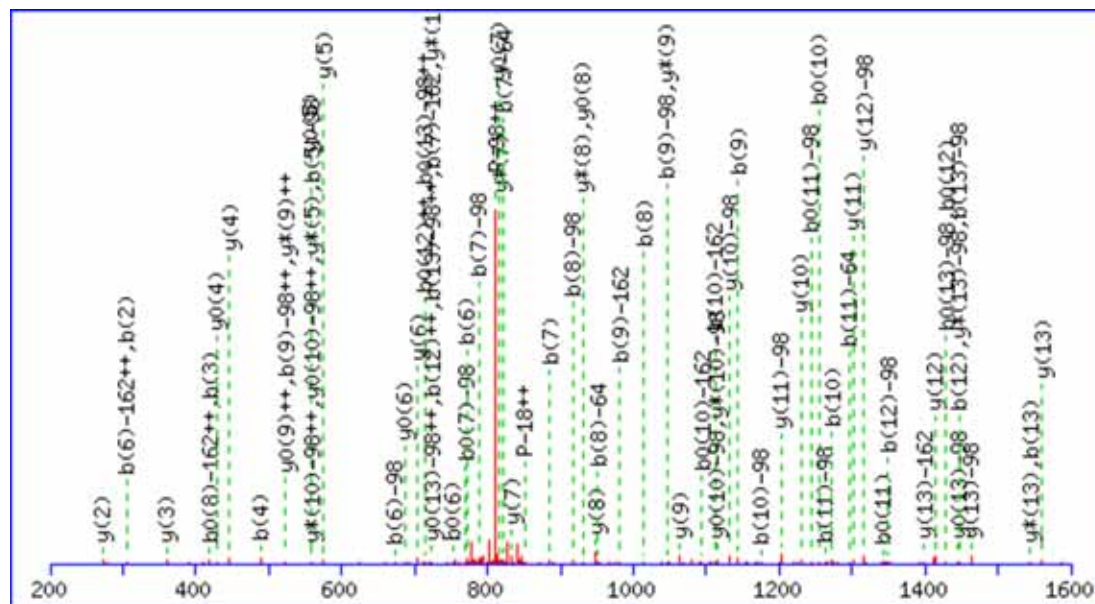

**Monoisotopic mass of neutral peptide Mr(calc):** 1717.6641

**Fixed modifications:** Carbamidomethyl (C) (apply to specified residues or termini only)

**Variable modifications:**

**N-term :** Dimethyl (N-term)

**M2 :** Oxidation (M), with neutral losses 0.0000(shown in table), 63.9983

**S5 :** Phospho (ST), with neutral losses 0.0000(shown in table), 97.9769

**K14 :** Dimethyl (K)

**Ions Score:** 83 **Expect:** 1.2e-007

**Matched b ions:** b(2), b(3), b(4), b(5)-98, b(6), b(6)-98, b(7), b(7)-98, b(8), b(8)-98, b(9), b(9)-98++, b(9)-98, b(10), b(10)-98, b(11)-98, b(12), b(12)-98, b(12)++, b(13), b(13)-98, b(13)-98++

**Matched y ions:** y(2), y(3), y(4), y(5), y(6), y(7), y(8), y(9), y(10)-98, y(10), y(11)-98, y(11), y(12)-98, y(12), y(13)-98, y(13)

**Precursor origin neutral loss:** +

## Peptide No.212

**EMLASDDEEESSPK**

**Confirmed sites:** @S:5

**Ambiguous sites:**

**MS/MS Fragmentation of EMLASDDEEESSPK**

Found in **NEXN\_MOUSE**, Nexilin OS=Mus musculus GN=Nexn PE=1 SV=2

Match to Query 2907: 1729.727946 from(865.871249,2+)

Title: Elution from: 26.713 to 26.713 scan no 1677 cid35.00 polarity:+:MA10

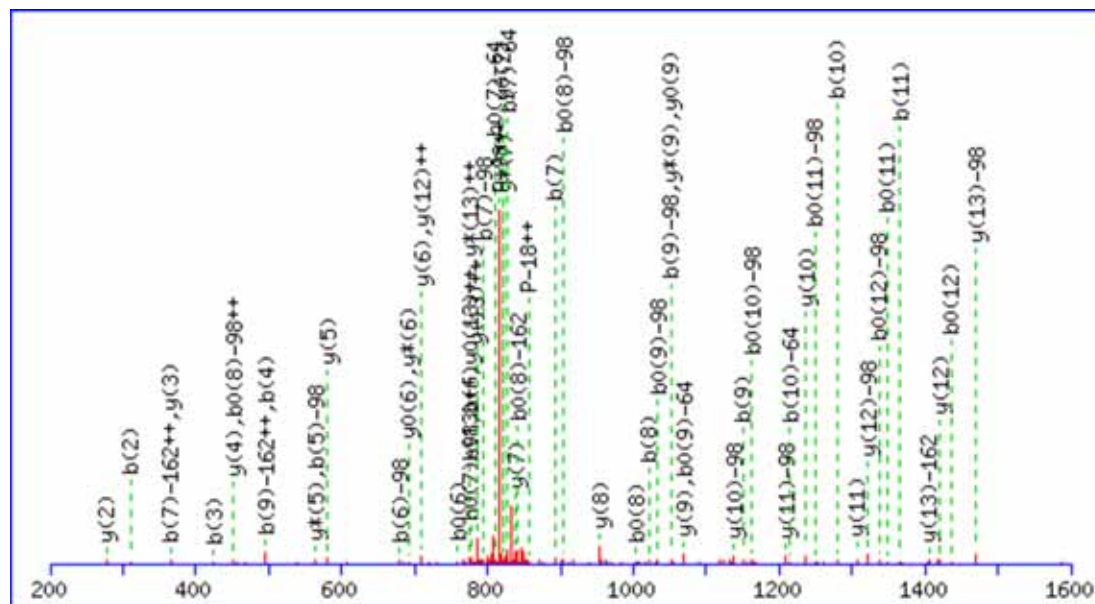

**Monoisotopic mass of neutral peptide Mr(calc): 1729.7277**

**Fixed modifications:** Carbamidomethyl (C) (apply to specified residues or termini only)

**Variable modifications:**

**N-term :** Dimethyl:2H(4)13C(2) (N-term)

**M2 :** Oxidation (M), with neutral losses 0.0000(shown in table), 63.9983

**S5 :** Phospho (ST), with neutral losses 97.9769(shown in table), 0.0000

**K14 :** Dimethyl:2H(4)13C(2) (K)

**Ions Score:** 94 **Expect:** 1.1e-008

**Matched b ions:** b(2), b(3), b(4), b(5)-98, b(6), b(6)-98, b(7), b(7)-98, b(8), b(9)-98, b(9), b(10), b(11), b(13)++

**Matched y ions:** y(2), y(3), y(4), y(5), y(6), y(7), y(8), y(9), y(10)-98, y(10), y(11)-98, y(11), y(12)++, y(12)-98, y(12), y(13)-98, y(13)++

**Precursor origin neutral loss:** +

## Peptide No.213

**ENLYQLMK**

**Confirmed sites:** @Y:4

**Ambiguous sites:**

**MS/MS Fragmentation of ENLYQLMK**

Found in **MAK\_MOUSE**, Serine/threonine-protein kinase MAK OS=Mus musculus GN=Mak PE=2 SV=1

Match to Query 686: 1167.546936 from(584.780744,2+)

Title: Elution from: 44.233 to 44.233 scan no 3896 cid35.00 polarity:+:MA10:m1s

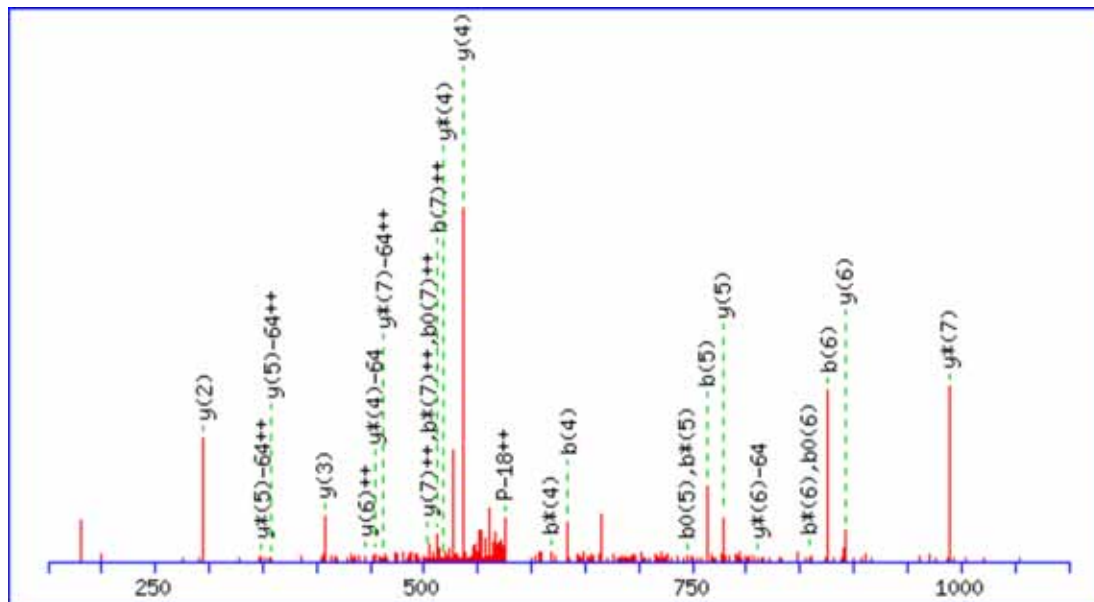

**Monoisotopic mass of neutral peptide Mr(calc):** 1167.5459

**Fixed modifications:** Carbamidomethyl (C) (apply to specified residues or termini only)

**Variable modifications:**

**N-term :** Dimethyl:2H(4)13C(2) (N-term)

**Y4 :** Phospho (Y)

**M7 :** Oxidation (M), with neutral losses 0.0000(shown in table), 63.9983

**Ions Score:** 30 **Expect:** 0.023

**Matched b ions:** b(4), b(5), b(6), b(7)++

**Matched y ions:** y(2), y(3), y(4), y(5), y(6), y(6)++, y(7)++

**Precursor origin neutral loss:** +

## Peptide No.214

**ENPPSPPTSPAAPQPR**

**Confirmed sites:** @S:5,@S:9

**Ambiguous sites:**

**MS/MS Fragmentation of ENPPSPPTSPAAPQPR**

Found in **SFR1\_MOUSE**, Swi5-dependent recombination DNA repair protein 1 homolog OS=Mus musculus GN=Meir5 PE=1 SV=2

Match to Query 4546: 1829.775230 from(915.894891,2+)

Title: Elution from: 33.506 to 33.506 scan no 2783 cid35.00 polarity:+:MA10:m1s





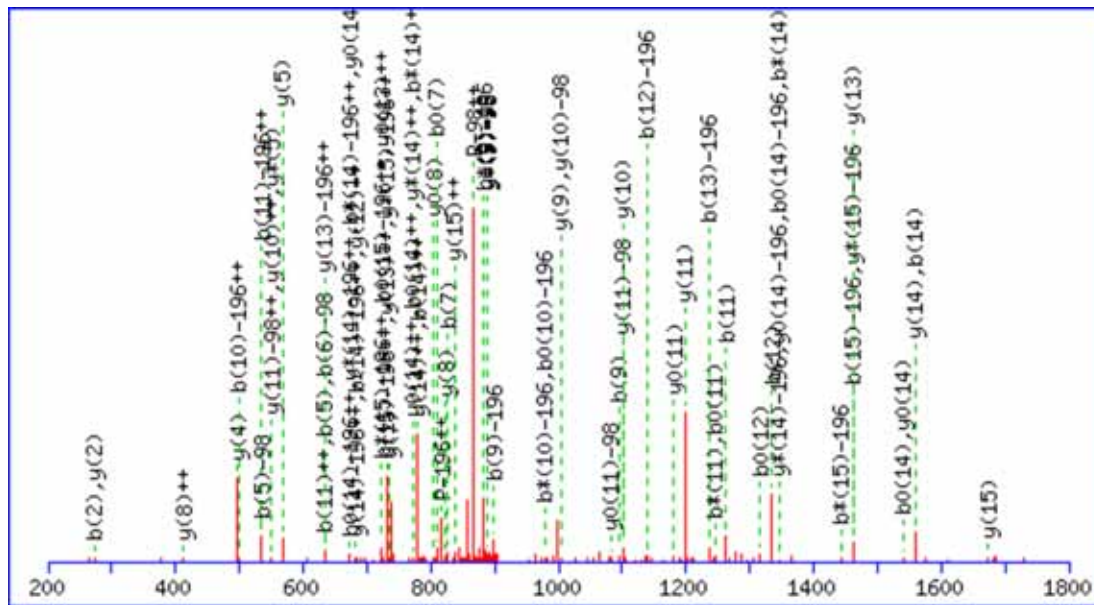

**Monoisotopic mass of neutral peptide Mr(calc):** 1829.7750

**Fixed modifications:** Carbamidomethyl (C) (apply to specified residues or termini only)

**Variable modifications:**

**N-term :** Dimethyl (N-term)

**S5 :** Phospho (ST), with neutral losses 0.0000(shown in table), 97.9769

**T8 :** Phospho (ST), with neutral losses 0.0000(shown in table), 97.9769

**Ions Score:** 37 **Expect:** 0.0079

**Matched b ions:** b(2), b(5)-98, b(5), b(6)-98, b(7), b(9)-98, b(9)-196, b(9), b(10)-196++, b(11), b(11)-196++, b(11)++, b(11)-98, b(12), b(12)-196, b(12)-98, b(13)-98, b(13)-196, b(14)-98++, b(14)++, b(14), b(14)-98, b(14)-196++, b(15)-196++, b(15)-98++, b(15)-98, b(15)-196

**Matched y ions:** y(2), y(4), y(5), y(7), y(8)++, y(8), y(9), y(10)++, y(10)-98, y(10), y(11)-98, y(11), y(11)-98++, y(12)-98++, y(12)-98, y(12)++, y(13)++, y(13), y(13)-196++, y(13)-98, y(13)-98++, y(14)-98++, y(14)++, y(14)-98, y(14), y(14)-196++, y(15)-98, y(15), y(15)++, y(15)-98++

**Precursor origin neutral loss:** +

## Peptide No.216

**ENPPSPPTSPAAPQQR**

**Confirmed sites:** @S:5,@S:9

**Ambiguous sites:**

MS/MS Fragmentation of **ENPPSPPTSPAAPQQR**

Found in **SFR1\_MOUSE**, Swi5-dependent recombination DNA repair protein 1 homolog OS=Mus musculus GN=Meir5 PE=1 SV=2

Match to Query 3252: 1835.808502 from(918.911527,2+)

Title: Elution from: 32.902 to 32.902 scan no 2392 cid35.00 polarity:+:MA10:m1s

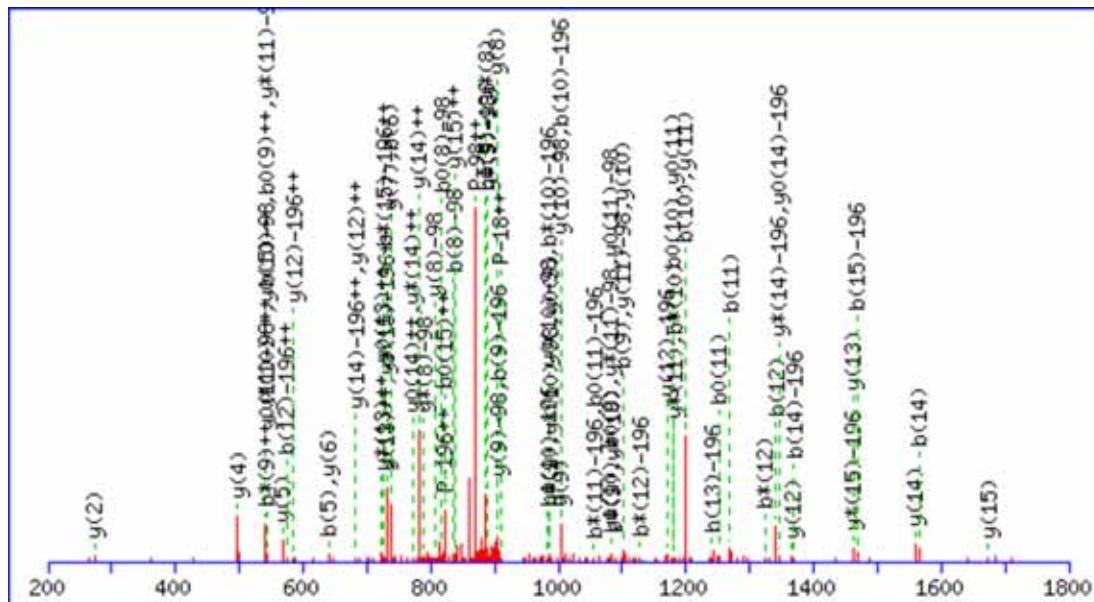

**Monoisotopic mass of neutral peptide Mr(calc):** 1835.8068

**Fixed modifications:** Carbamidomethyl (C) (apply to specified residues or termini only)

**Variable modifications:**

**N-term :** Dimethyl:2H(4)13C(2) (N-term)

**S5 :** Phospho (ST), with neutral losses 0.0000(shown in table), 97.9769

**S9 :** Phospho (ST), with neutral losses 0.0000(shown in table), 97.9769

**Ions Score:** 78 **Expect:** 6.8e-007

**Matched b ions:** b(5)-98, b(5), b(6), b(8)-98, b(9)-98, b(9), b(9)-196, b(10)-196, b(10)-98, b(10), b(11), b(11)-98++, b(11)-98, b(12), b(12)-98, b(12)-196++, b(13)-98, b(13)-196, b(14), b(14)-98, b(14)-196, b(15)-98, b(15)-196

**Matched y ions:** y(2), y(4), y(5), y(6), y(7), y(8), y(8)-98, y(9), y(9)-98, y(10)-98, y(10), y(11)-98, y(11), y(12), y(12)-196++, y(12)-98, y(12)-196, y(12)++, y(13)++, y(13), y(13)-98++, y(14)-98++, y(14)++, y(14)-98, y(14), y(14)-196++, y(15), y(15)-98++, y(15)++

**Precursor origin neutral loss:** +

## Peptide No.217

**ENPPVEDSSDEDDKRNPGNLYDK**

**Confirmed sites:** @S:8,@S:9

**Ambiguous sites:**

MS/MS Fragmentation of **ENPPVEDSSDEDDKRNPGNLYDK**

Found in **STT3B\_MOUSE**, Dolichyl-diphosphooligosaccharide--protein glycosyltransferase subunit STT3B OS=Mus musculus GN=Stt3b PE=1 SV=2

Match to Query 6759: 2876.183904 from(959.735244,3+)

Title: Elution from: 35.182 to 35.182 scan no 2701 cid35.00 polarity:+:MA10:m1s



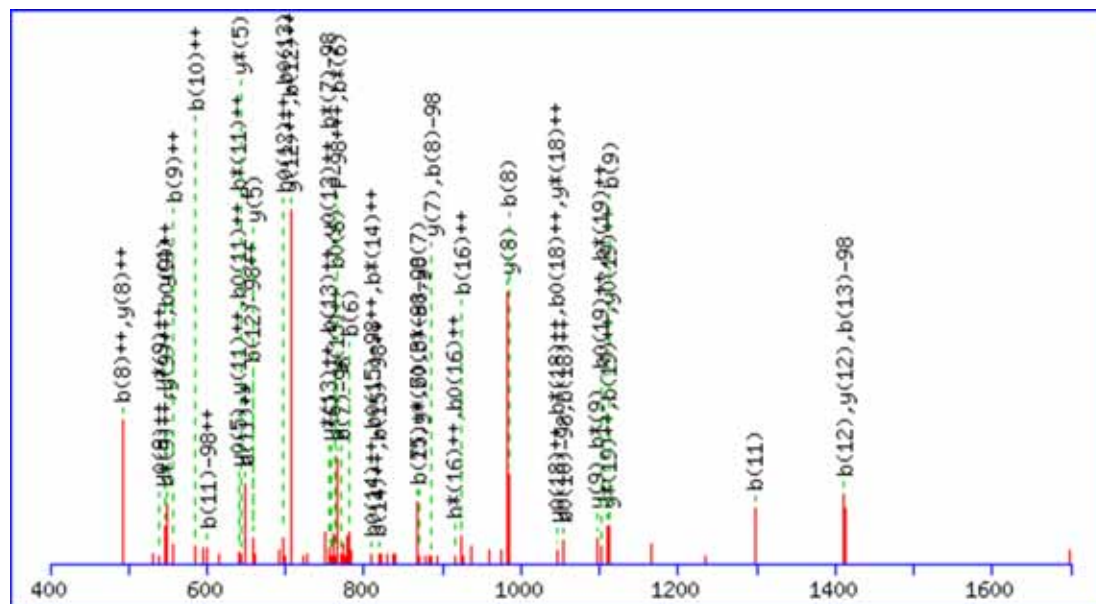

**Monoisotopic mass of neutral peptide Mr(calc):** 2393.0887

**Fixed modifications:** Carbamidomethyl (C) (apply to specified residues or termini only)

**Variable modifications:**

**N-term :** Dimethyl (N-term)

**T5 :** Phospho (ST), with neutral losses 0.0000(shown in table), 97.9769

**K20 :** Dimethyl (K)

**Ions Score:** 64 **Expect:** 2.8e-005

**Matched b ions:** b(6), b(7), b(7)-98, b(8)++, b(8), b(8)-98, b(9), b(9)++, b(10)++, b(11)++, b(11), b(11)-98++, b(12)++, b(12), b(12)-98++, b(13)-98++, b(13)-98, b(13)++, b(14)++, b(15)++, b(15)-98++, b(16)++, b(18)++, b(19)++

**Matched y ions:** y(4), y(5), y(6), y(7), y(8)++, y(8), y(9)++, y(9), y(11)++, y(12)++, y(12), y(13)++

**Precursor origin neutral loss:** +

## Peptide No.219

**EQEGTESDEGQLPQVLEELK**

**Confirmed sites:** @T:5,@S:7

**Ambiguous sites:**

**MS/MS Fragmentation of EQEGTESDEGQLPQVLEELK**

Found in **OBSCN\_MOUSE**, Obscurin OS=Mus musculus GN=Obscn PE=2 SV=2

Match to Query 6511: 2473.058322 from(825.360050,3+)

Title: Elution from: 71.009 to 71.009 scan no 6600 cid35.00 polarity:+:MA10:m1s





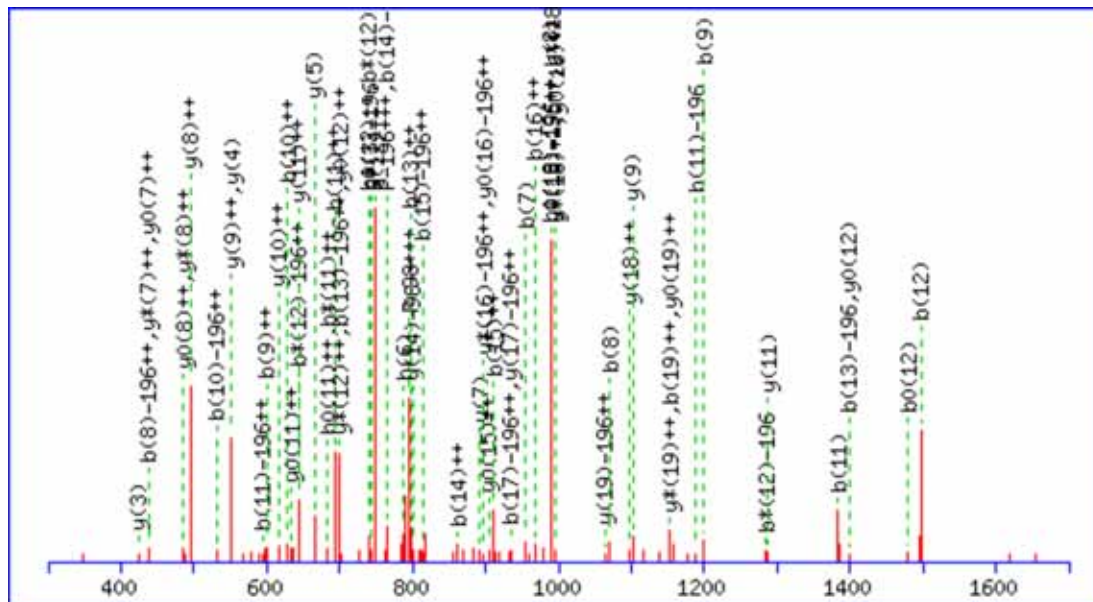

**Monoisotopic mass of neutral peptide Mr(calc):** 2485.1186

**Fixed modifications:** Carbamidomethyl (C) (apply to specified residues or termini only)

**Variable modifications:**

**N-term :** Dimethyl:2H(4)13C(2) (N-term)

**T5 :** Phospho (ST), with neutral losses 0.0000(shown in table), 97.9769

**S7 :** Phospho (ST), with neutral losses 0.0000(shown in table), 97.9769

**K20 :** Dimethyl:2H(4)13C(2) (K)

**Ions Score:** 49 **Expect:** 0.0011

**Matched b ions:** b(6), b(7), b(8)-196++, b(8), b(8)-98++, b(9)-98++, b(9), b(9)++, b(10)-98, b(10)-196++, b(10)++, b(11)++, b(11), b(11)-98++, b(11)-98, b(11)-196, b(11)-196++, b(12)++, b(12), b(12)-98++, b(12)-98, b(13)-98++, b(13)-98, b(13)-196++, b(13)-196, b(13)++, b(14)++, b(14)-196++, b(14)-98++, b(15)++, b(15)-98++, b(15)-196++, b(16)++, b(16)-98++, b(17)-196++, b(19)++, b(19)-98++

**Matched y ions:** y(3), y(4), y(5), y(6), y(7), y(8)++, y(8), y(9)++, y(9), y(10)++, y(11)++, y(11), y(14)-98++, y(16)-98++, y(17)-196++, y(18)++, y(19)-196++

**Precursor origin neutral loss:** +

## Peptide No.221

**EQESSGEEDNDLSPEER**

**Confirmed sites:** @S:4,@S:5

**Ambiguous sites:**

**MS/MS Fragmentation of EQESSGEEDNDLSPEER**

Found in **IPP2\_MOUSE**, Protein phosphatase inhibitor 2 OS=Mus musculus GN=Ppp1r2 PE=1 SV=3

Match to Query 6993: 2136.741574 from(1069.378063,2+)

Title: Elution from: 33.030 to 33.030 scan no 2643 cid35.00 polarity:+:MA10:m1s







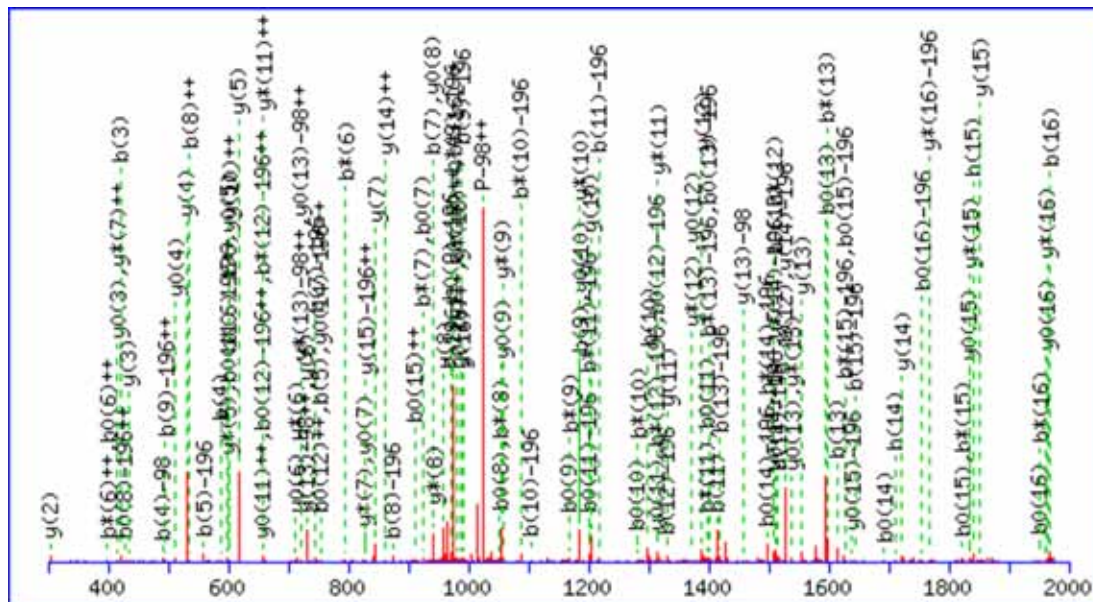

**Monoisotopic mass of neutral peptide Mr(calc):** 2142.7727

**Fixed modifications:** Carbamidomethyl (C) (apply to specified residues or termini only)

**Variable modifications:**

**N-term :** Dimethyl:2H(4)13C(2) (N-term)

**S4 :** Phospho (ST), with neutral losses 0.0000(shown in table), 97.9769

**S5 :** Phospho (ST), with neutral losses 0.0000(shown in table), 97.9769

**Ions Score:** 68 **Expect:** 2.1e-006

**Matched b ions:** b(3), b(4)-98, b(4), b(5)-196, b(5)-98, b(5), b(6)-98, b(7)-98++, b(7)-98, b(7)-196, b(7), b(8)-196, b(8)-98, b(8)++, b(9), b(9)-98, b(9)-196++, b(9)-196, b(10), b(10)-98, b(10)-196, b(11), b(11)-98, b(11)-98++, b(11)-196, b(12)-98, b(12), b(12)-196, b(13), b(13)-196, b(13)-98, b(14)-98, b(14), b(14)-196, b(15), b(15)-98, b(15)-196, b(16), b(16)-98, b(16)-98++

**Matched y ions:** y(2), y(3), y(4), y(5), y(6), y(7), y(8), y(10), y(10)++, y(11), y(12), y(13)-98++, y(13), y(13)-98, y(14), y(14)-196, y(14)-98, y(14)++, y(15)-196++, y(15), y(16)-98++, y(16)++

**Precursor origin neutral loss:** +

## Peptide No.224

**EQGTESRSSTPLPTVSSSAENTR**

**Confirmed sites:** @S:9,@T:10

**Ambiguous sites:**

MS/MS Fragmentation of **EQGTESRSSTPLPTVSSSAENTR**

Found in **LAP2A\_MOUSE**, Lamina-associated polypeptide 2, isoforms alpha/zeta OS=Mus musculus GN=Tmpo PE=1 SV=3

Match to Query 6661: 2608.110933 from(870.377587,3+)

Title: Elution from: 32.683 to 32.683 scan no 2464 cid35.00 polarity:+:MA10:m1s

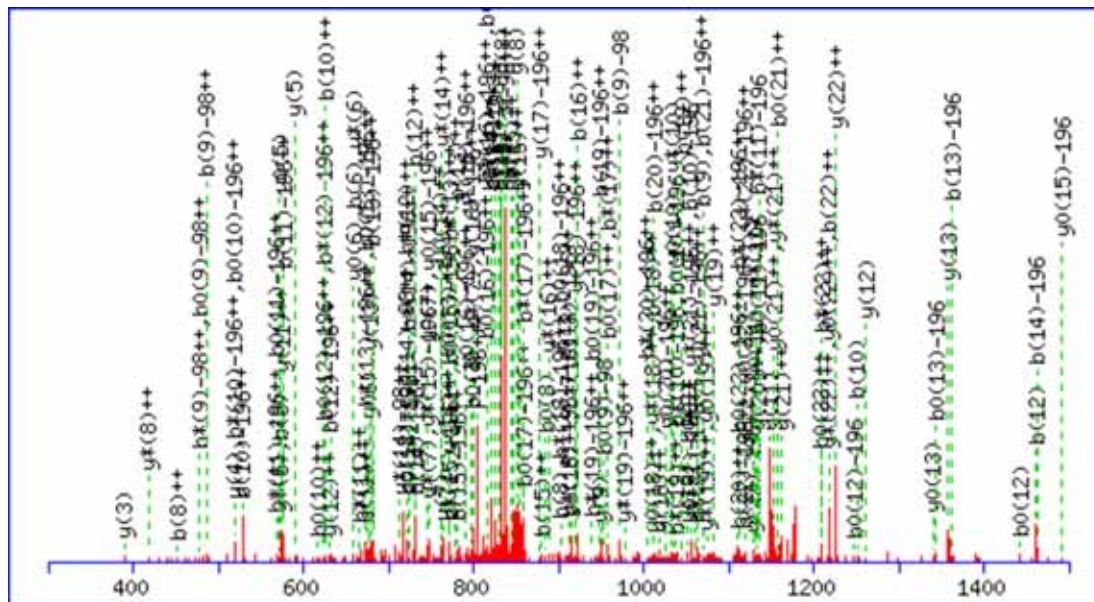

**Monoisotopic mass of neutral peptide Mr(calc):** 2608.1055

**Fixed modifications:** Carbamidomethyl (C) (apply to specified residues or termini only)

**Variable modifications:**

**N-term :** Dimethyl (N-term)

**S9 :** Phospho (ST), with neutral losses 97.9769(shown in table), 0.0000

**T10 :** Phospho (ST), with neutral losses 97.9769(shown in table), 0.0000

**Ions Score:** 34 **Expect:** 0.025

**Matched b ions:** b(5), b(6), b(7), b(8)++, b(8), b(9)-98++, b(9)-98, b(9), b(10)-196++, b(10)-196, b(10)-98++, b(10)-98, b(10)++, b(10), b(11)-196++, b(11)++, b(11)-98++, b(11)-98, b(12)-98++, b(12), b(12)++, b(12)-98, b(12)-196++, b(13)-98, b(13)-98++, b(13)-196++, b(13)-196, b(13)++, b(14)-196++, b(14)-196, b(14)-98++, b(14)++, b(15)-196++, b(15)-98++, b(15)++, b(16)++, b(16)-196++, b(17)-98++, b(18)-196++, b(18)++, b(19)-196++, b(19)-98++, b(19)++, b(20)-196++, b(20)-98++, b(20)++, b(21)-196++, b(22)++, b(22)-98++, b(22)-196++

**Matched y ions:** y(3), y(4), y(5), y(6), y(7), y(8), y(9), y(10), y(11), y(11)++, y(12)++, y(12), y(13), y(13)++, y(14)-98++, y(14)++, y(15)-98++, y(15)++, y(16)-196++, y(17)-196++, y(18)++, y(18)-98++, y(18)-196++, y(19)++, y(19)-98++, y(20)-98++, y(20)++, y(21)-196++, y(21)++, y(21)-98++, y(22)++, y(22)-98++, y(22)-196++

**Precursor origin neutral loss:** +

## Peptide No.225

**EQLSEVEGSGEDDQGDDHSESAQK**

**Confirmed sites:** @S:9

**Ambiguous sites:**

**MS/MS Fragmentation of EQLSEVEGSGEDDQGDDHSESAQK**

Found in **UBP4\_MOUSE**, Ubiquitin carboxyl-terminal hydrolase 4 OS=Mus musculus GN=Usp4 PE=1 SV=2

Match to Query 8161: 2711.072922 from(904.698250,3+)

Title: Elution from: 29.476 to 29.476 scan no 2233 cid35.00 polarity:+:MA10:m1s

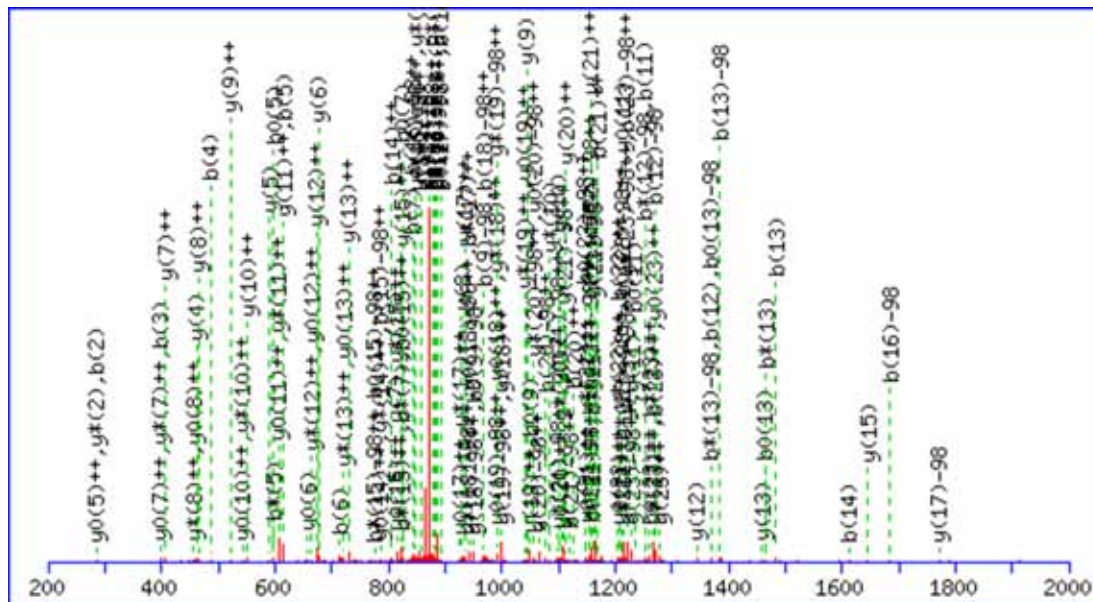

**Monoisotopic mass of neutral peptide Mr(calc): 2711.0719**

**Fixed modifications:** Carbamidomethyl (C) (apply to specified residues or termini only)

**Variable modifications:**

**N-term :** Dimethyl (N-term)

**S9 :** Phospho (ST), with neutral losses 97.9769(shown in table), 0.0000

**K24 :** Dimethyl (K)

**Ions Score:** 108 **Expect:** 7.5e-010

**Matched b ions:** b(2), b(3), b(4), b(5), b(6), b(7), b(9)-98, b(11)-98, b(11), b(12), b(12)-98, b(13)-98, b(13), b(14), b(14)++, b(15)-98++, b(16)-98, b(16)-98++, b(16)++, b(18)-98++, b(20)-98++, b(20)++, b(21)-98++, b(21)++, b(22)-98++, b(22)++, b(23)++, b(23)-98++

**Matched y ions:** y(4), y(5), y(6), y(7)++, y(7), y(8)++, y(8), y(9)++, y(9), y(10)++, y(10), y(11)++, y(11), y(12)++, y(12), y(13)++, y(13), y(15), y(15)++, y(16)-98++, y(17)-98++, y(17)-98, y(17)++, y(18)++, y(18)-98++, y(19)-98++, y(19)++, y(20)-98++, y(20)++, y(21)-98++, y(21)++, y(22)-98++, y(22)++, y(23)-98++, y(23)++

**Precursor origin neutral loss:** +

## Peptide No.226

**ERLGSFGSITR**

**Confirmed sites:** @S:5

**Ambiguous sites:**

**MS/MS Fragmentation of ERLGSFGSITR**

Found in **FLNC\_MOUSE**, Filamin-C OS=Mus musculus GN=Flnc PE=1 SV=3

Match to Query 1744: 1329.645386 from(665.829969,2+)

Title: Elution from: 41.377 to 41.377 scan no 3847 cid35.00 polarity:+:MA10

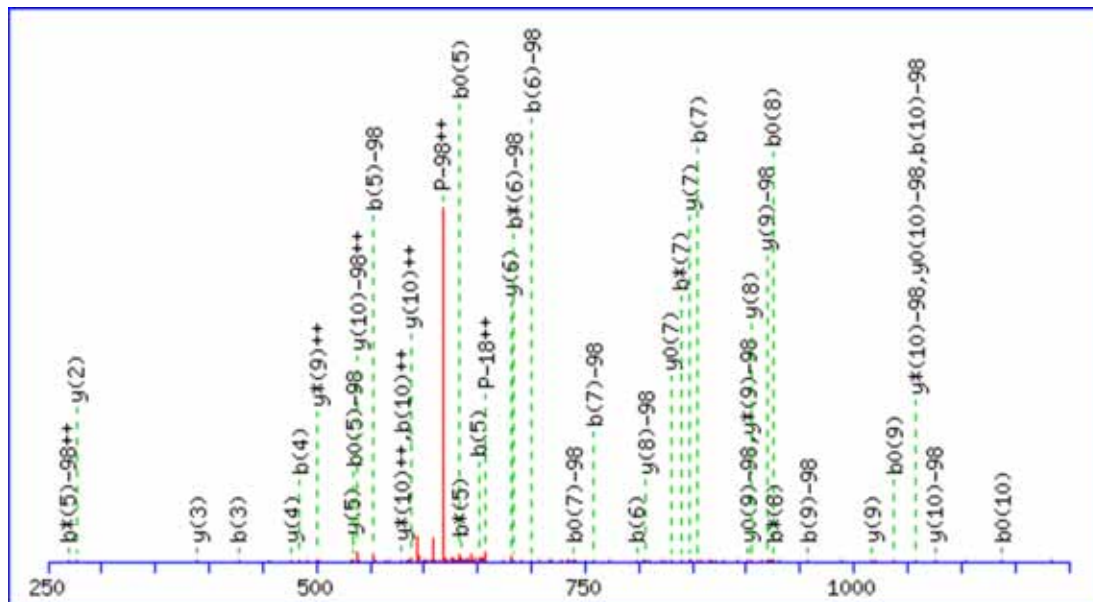

**Monoisotopic mass of neutral peptide Mr(calc):** 1329.6442

**Fixed modifications:** Carbamidomethyl (C) (apply to specified residues or termini only)

**Variable modifications:**

**N-term :** Dimethyl (N-term)

**S5 :** Phospho (ST), with neutral losses 97.9769(shown in table), 0.0000

**Ions Score:** 34 **Expect:** 0.014

**Matched b ions:** b(3), b(4), b(5)-98, b(5), b(6)-98, b(6), b(7)-98, b(7), b(9)-98, b(10)-98, b(10)++

**Matched y ions:** y(2), y(3), y(4), y(5), y(6), y(7), y(8)-98, y(8), y(9), y(9)-98, y(10)-98, y(10)-98, y(10)++

**Precursor origin neutral loss:** +

## Peptide No.227

**ESDDKPEIEDVGSDEEEEEK**

**Confirmed sites:** @S:13

**Ambiguous sites:**

**MS/MS Fragmentation of ESDDKPEIEDVGSDEEEEEK**

Found in **HS90A\_MOUSE**, Heat shock protein HSP 90-alpha OS=Mus musculus GN=Hsp90aa1 PE=1 SV=4

Match to Query 5847: 2471.004051 from(824.675293,3+)

Title: Elution from: 36.085 to 36.085 scan no 2914 cid35.00 polarity:+:MA10:m1s



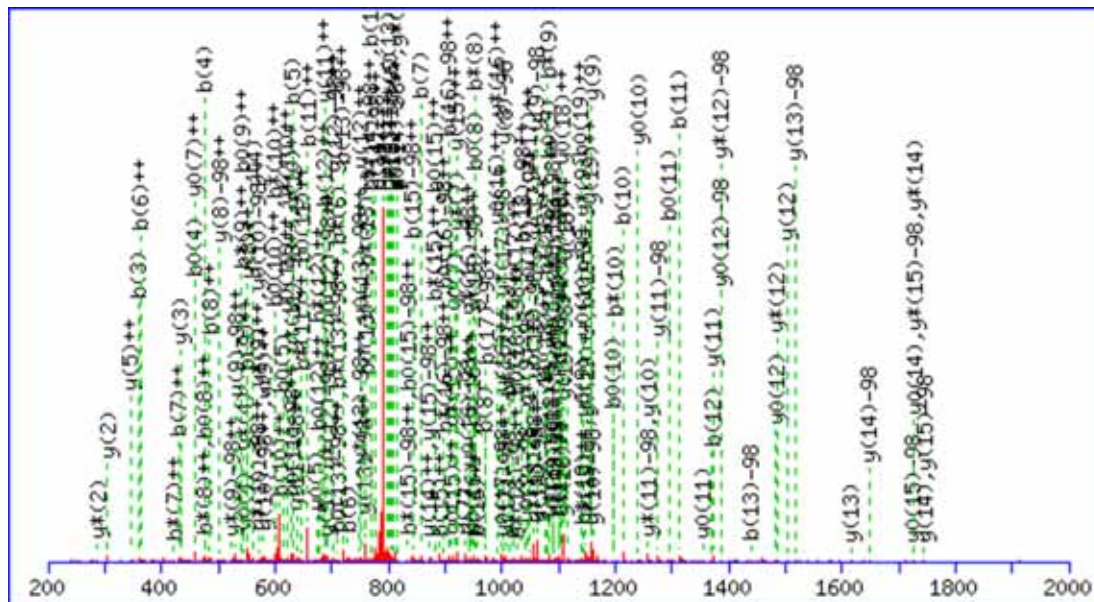

**Monoisotopic mass of neutral peptide Mr(calc):** 2470.9999

**Fixed modifications:** Carbamidomethyl (C) (apply to specified residues or termini only)

**Variable modifications:**

**N-term :** Dimethyl (N-term)

**K5 :** Dimethyl (K)

**S13 :** Phospho (ST), with neutral losses 97.9769(shown in table), 0.0000

**K20 :** Dimethyl (K)

**Ions Score:** 54 **Expect:** 0.00017

**Matched b ions:** b(3), b(4), b(5), b(6)++, b(6), b(7)++, b(7), b(8)++, b(8), b(9)++, b(9), b(10)++, b(10), b(11)++, b(11), b(12)++, b(12), b(13)-98++, b(13)++, b(13)-98, b(14)-98++, b(15)++, b(15)-98++, b(16)-98++, b(16)++, b(17)-98++, b(17)++, b(18)-98++, b(18)++, b(19)++, b(19)-98++

**Matched y ions:** y(2), y(3), y(4), y(5), y(5)++, y(7), y(8), y(8)-98++, y(8)++, y(8)-98, y(9)-98++, y(9)-98, y(9), y(9)++, y(10), y(10)-98, y(10)++, y(10)-98++, y(11), y(11)-98, y(11)++, y(11)-98++, y(12), y(12)-98++, y(12)++, y(13), y(13)-98++, y(13)-98, y(13)++, y(14)-98, y(14), y(14)++, y(15)++, y(15)-98, y(15)-98++, y(16)++, y(16)-98++, y(17)++, y(17)-98++, y(18)++, y(18)-98++, y(19)-98++, y(19)++

**Precursor origin neutral loss:** +

## Peptide No.228

**ESDDKPEIEDVGSDEEEEEK**

**Confirmed sites:** @S:13

**Ambiguous sites:**

MS/MS Fragmentation of **ESDDKPEIEDVGSDEEEEEK**

Found in **HS90A\_MOUSE**, Heat shock protein HSP 90-alpha OS=Mus musculus GN=Hsp90aa1 PE=1 SV=4

Match to Query 5895: 2489.097660 from(830.706496,3+)

Title: Elution from: 36.077 to 36.077 scan no 2913 cid35.00 polarity:+:MA10:m1s

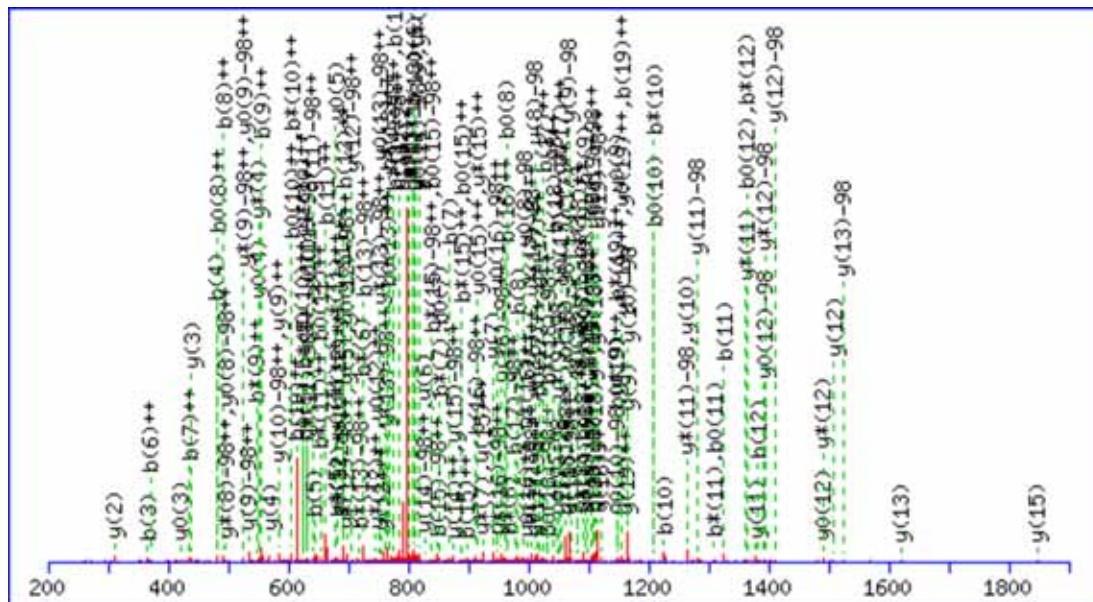

**Monoisotopic mass of neutral peptide Mr(calc):** 2489.0954

**Fixed modifications:** Carbamidomethyl (C) (apply to specified residues or termini only)

**Variable modifications:**

**N-term :** Dimethyl:2H(4)13C(2) (N-term)

**K5 :** Dimethyl:2H(4)13C(2) (K)

**S13 :** Phospho (ST), with neutral losses 97.9769(shown in table), 0.0000

**K20 :** Dimethyl:2H(4)13C(2) (K)

**Ions Score:** 75 **Expect:** 2.3e-006

**Matched b ions:** b(3), b(4), b(5), b(6)++, b(7)++, b(7), b(8)++, b(8), b(9)++, b(9), b(10)++, b(10), b(11)++, b(11), b(12)++, b(12), b(13)-98++, b(13)++, b(14)-98++, b(15)++, b(15)-98++, b(16)-98++, b(16)++, b(17)-98++, b(17)++, b(18)-98++, b(18)++, b(19)-98++, b(19)++

**Matched y ions:** y(2), y(3), y(4), y(5), y(6), y(7), y(8)-98, y(8), y(9), y(9)-98, y(9)++, y(9)-98, y(10), y(10)-98, y(10)++, y(11), y(11)-98, y(11)++, y(11)-98, y(12)-98, y(12), y(12)-98, y(12)++, y(13), y(13)-98, y(13)-98, y(13)++, y(14)++, y(14)-98, y(15), y(15)++, y(15)-98, y(16)++, y(16)-98, y(17)-98, y(17)++, y(18)-98, y(18)++, y(19)-98, y(19)++

**Precursor origin neutral loss:** +

## Peptide No.229

**ESDDKPEIEDVGSDEEEEEKK**

**Confirmed sites:** @S:13

**Ambiguous sites:**

MS/MS Fragmentation of **ESDDKPEIEDVGSDEEEEEKK**

Found in **HS90A\_MOUSE**, Heat shock protein HSP 90-alpha OS=Mus musculus GN=Hsp90aa1 PE=1 SV=4

Match to Query 7960: 2627.128107 from(876.716645,3+)

Title: Elution from: 34.037 to 34.037 scan no 2856 cid35.00 polarity:+:MA10:m1s

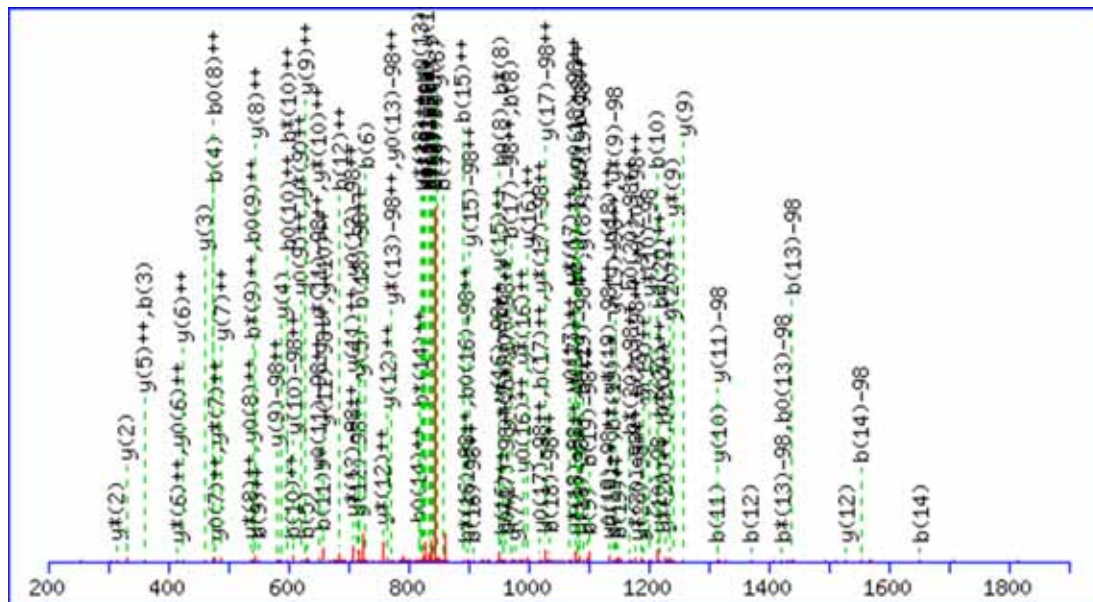

**Monoisotopic mass of neutral peptide Mr(calc):** 2627.1262

**Fixed modifications:** Carbamidomethyl (C) (apply to specified residues or termini only)

**Variable modifications:**

**N-term :** Dimethyl (N-term)

**K5 :** Dimethyl (K)

**S13 :** Phospho (ST), with neutral losses 97.9769(shown in table), 0.0000

**K20 :** Dimethyl (K)

**K21 :** Dimethyl (K)

**Ions Score:** 74 **Expect:** 2.5e-006

**Matched b ions:** b(3), b(4), b(5), b(6), b(7), b(8), b(9)++, b(9), b(10), b(10)++, b(11), b(11)++, b(12)++, b(12), b(13)-98, b(13)-98++, b(14), b(14)-98, b(14)++, b(15)-98++, b(15)++, b(16)++, b(16)-98++, b(17)++, b(17)-98++, b(18)-98++, b(18)++, b(19)-98++, b(19)++, b(20)-98++, b(20)++

**Matched y ions:** y(2), y(3), y(4), y(5)++, y(5), y(6)++, y(6), y(7)++, y(7), y(8)++, y(8), y(9), y(9)-98++, y(9)++, y(10)-98++, y(10)++, y(10), y(10)-98, y(11)++, y(11)-98++, y(11)-98, y(12), y(12)-98++, y(12)++, y(13)++, y(14)-98++, y(15)++, y(15)-98++, y(16)-98++, y(16)++, y(17)-98++, y(17)++, y(18)-98++, y(18)++, y(19)-98++, y(19)++, y(20)-98++, y(20)++

**Precursor origin neutral loss:** +

## Peptide No.230

**ESDDKPEIEDVGSDEEEEEKK**

**Confirmed sites:** @S:13

**Ambiguous sites:**

MS/MS Fragmentation of **ESDDKPEIEDVGSDEEEEEKK**

Found in **HS90A\_MOUSE**, Heat shock protein HSP 90-alpha OS=Mus musculus GN=Hsp90aa1 PE=1 SV=4

Match to Query 6999: 2651.255343 from(884.759057,3+)

Title: Elution from: 33.987 to 33.987 scan no 2644 cid35.00 polarity:+:MA10:m1s



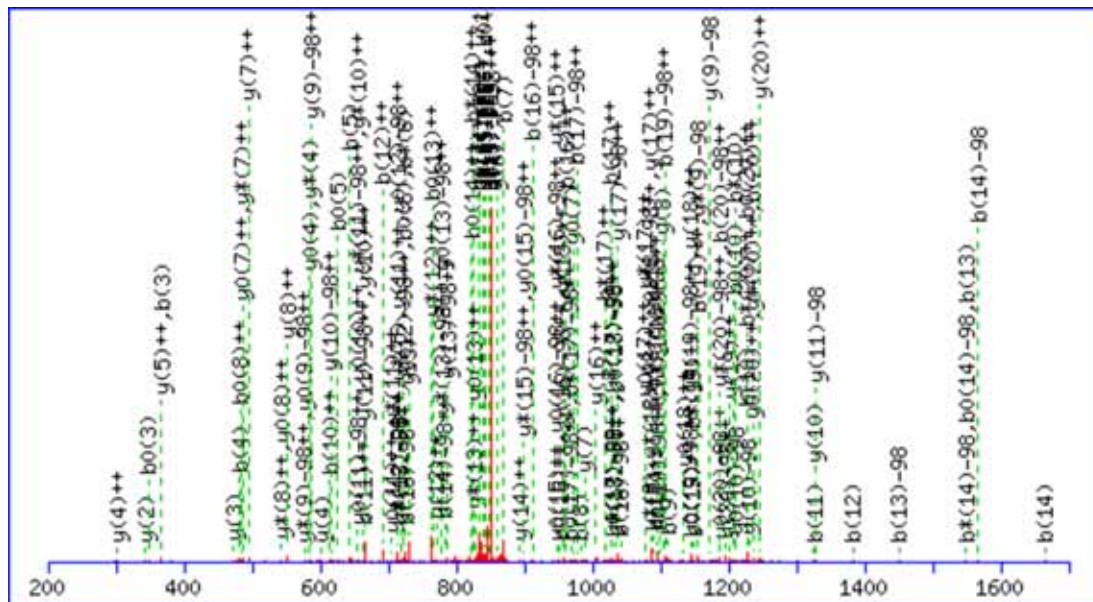

**Monoisotopic mass of neutral peptide Mr(calc):** 2651.2534

**Fixed modifications:** Carbamidomethyl (C) (apply to specified residues or termini only)

**Variable modifications:**

**N-term :** Dimethyl:2H(4)13C(2) (N-term)

**K5 :** Dimethyl:2H(4)13C(2) (K)

**S13 :** Phospho (ST), with neutral losses 97.9769(shown in table), 0.0000

**K20 :** Dimethyl:2H(4)13C(2) (K)

**K21 :** Dimethyl:2H(4)13C(2) (K)

**Ions Score:** 83 **Expect:** 5.2e-007

**Matched b ions:** b(3), b(4), b(5), b(7), b(8), b(9), b(10), b(10)++, b(11), b(11)++, b(12)++, b(12), b(13)-98, b(13), b(13)-98++, b(14)-98, b(14), b(14)-98++, b(14)++, b(15)-98++, b(16)++, b(16)-98++, b(17)-98++, b(17)++, b(18)-98++, b(18)++, b(19)-98++, b(19)++, b(20)++, b(20)-98++

**Matched y ions:** y(2), y(3), y(4)++, y(4), y(5)++, y(5), y(6), y(7)++, y(7), y(8)++, y(8), y(9)-98++, y(9)-98, y(10)++, y(10), y(10)-98, y(10)-98++, y(11)-98++, y(11)-98, y(11)++, y(12)-98++, y(12)++, y(13)++, y(13)-98++, y(14)-98++, y(14)++, y(15)++, y(16)-98++, y(16)++, y(17)++, y(17)-98++, y(18)++, y(18)-98++, y(19)++, y(20)-98++, y(20)++

**Precursor origin neutral loss:** +

## Peptide No.231

**ESLKEEDESDDDNM**

**Confirmed sites:** @S:9

**Ambiguous sites:**

MS/MS Fragmentation of **ESLKEEDESDDDNM**

Found in **PSA3\_MOUSE**, Proteasome subunit alpha type-3 OS=Mus musculus GN=Psma3 PE=1 SV=3

Match to Query 3456: 1806.640228 from(904.327390,2+)

Title: Elution from: 24.227 to 24.227 scan no 1373 cid35.00 polarity:+:MA10



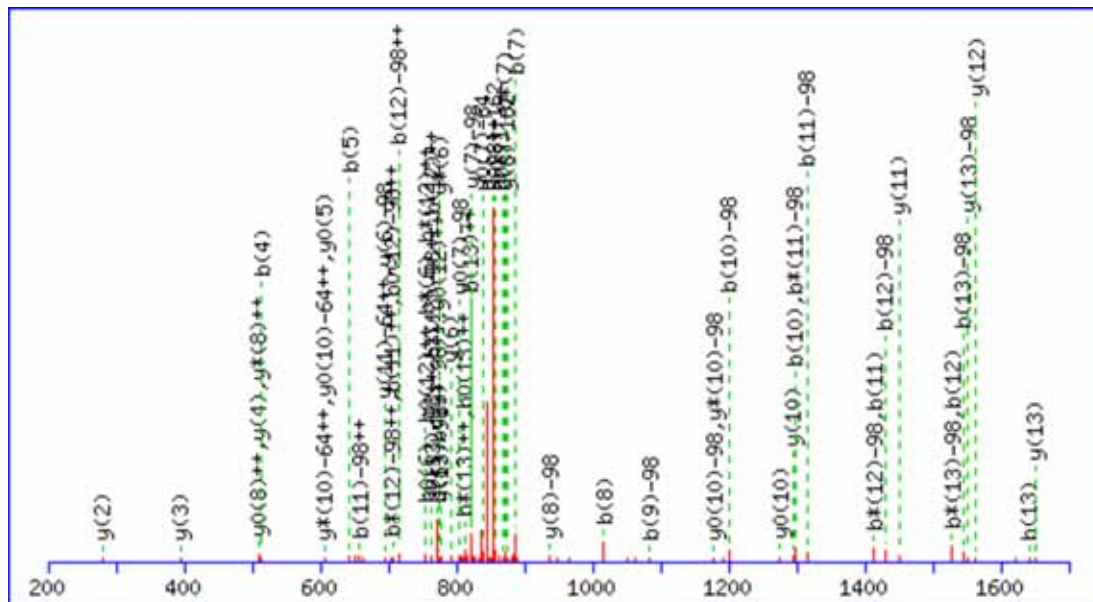

**Monoisotopic mass of neutral peptide Mr(calc):** 1806.6390

**Fixed modifications:** Carbamidomethyl (C) (apply to specified residues or termini only)

**Variable modifications:**

**N-term :** Dimethyl (N-term)

**K4 :** Dimethyl (K)

**S9 :** Phospho (ST), with neutral losses 97.9769(shown in table), 0.0000

**M14 :** Oxidation (M), with neutral losses 0.0000(shown in table), 63.9983

**Ions Score:** 82 **Expect:** 5.1e-008

**Matched b ions:** b(4), b(5), b(6), b(7), b(8), b(9)-98, b(10)-98, b(10), b(11), b(11)-98++, b(11)-98, b(11)++, b(12), b(12)-98, b(12)-98++, b(12)++, b(13)-98++, b(13), b(13)-98, b(13)++

**Matched y ions:** y(2), y(3), y(4), y(6)-98, y(6), y(7)-98, y(8)-98, y(10), y(11), y(12), y(13), y(13)-98, y(13)-98++

**Precursor origin neutral loss:** +

## Peptide No.232

**ESLKEEDESDDDNM**

**Confirmed sites:** @S:9

**Ambiguous sites:**

MS/MS Fragmentation of **ESLKEEDESDDDNM**

Found in **PSA3\_MOUSE**, Proteasome subunit alpha type-3 OS=Mus musculus GN=Psma3 PE=1 SV=3

Match to Query 4252: 1790.643736 from(896.329144,2+)

Title: Elution from: 30.964 to 30.964 scan no 2438 cid35.00 polarity:+:MA10

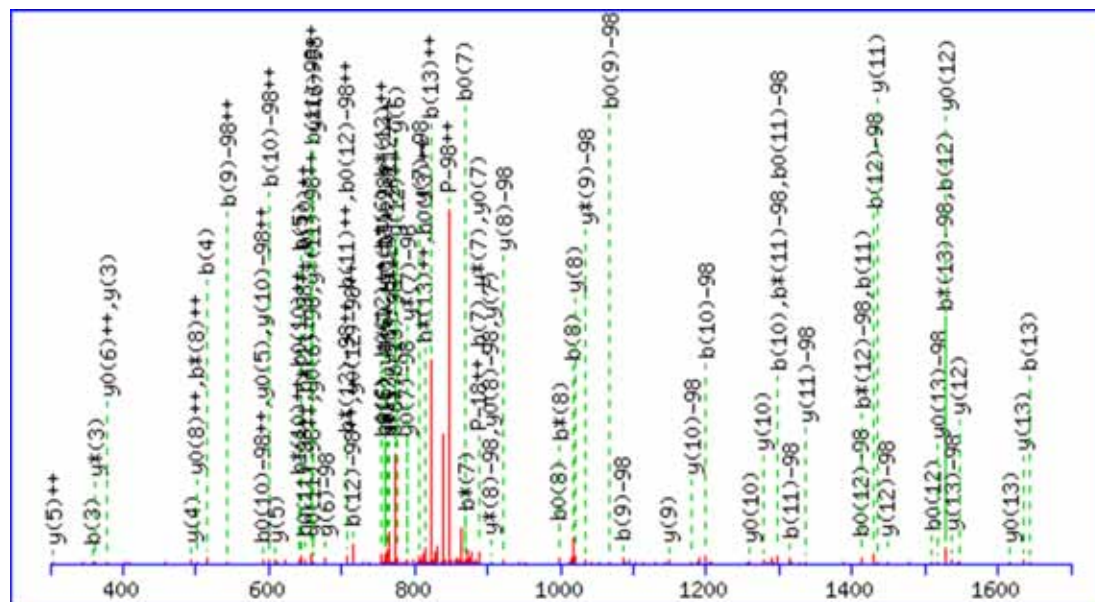

**Monoisotopic mass of neutral peptide Mr(calc):** 1790.6441

**Fixed modifications:** Carbamidomethyl (C) (apply to specified residues or termini only)

**Variable modifications:**

**N-term :** Dimethyl (N-term)

**K4 :** Dimethyl (K)

**S9 :** Phospho (ST), with neutral losses 97.9769(shown in table), 0.0000

**Ions Score:** 52 **Expect:** 6.6e-005

**Matched b ions:** b(3), b(4), b(5), b(6), b(7), b(8), b(9)-98, b(9)-98+, b(10)-98, b(10), b(10)-98+, b(10)++, b(11)-98+, b(11)-98, b(11), b(11)++, b(12)-98, b(12), b(12)++, b(12)-98+, b(13)-98+, b(13)++, b(13)

**Matched y ions:** y(3), y(4), y(5)++, y(5), y(6)-98, y(6), y(7), y(7)-98, y(8)-98, y(8), y(9), y(10)-98+, y(10), y(10)-98, y(11)-98, y(11), y(12)-98, y(12), y(12)++, y(13), y(13)-98

**Precursor origin neutral loss:** +

## Peptide No.233

**ESLKEEDESDDDNM**

**Confirmed sites:** @S:9

**Ambiguous sites:**

MS/MS Fragmentation of **ESLKEEDESDDDNM**

Found in **PSA3\_MOUSE**, Proteasome subunit alpha type-3 OS=Mus musculus GN=Psma3 PE=1 SV=3

Match to Query 3433: 1818.703136 from(910.358844,2+)

Title: Elution from: 24.251 to 24.251 scan no 1402 cid35.00 polarity:+:MA10



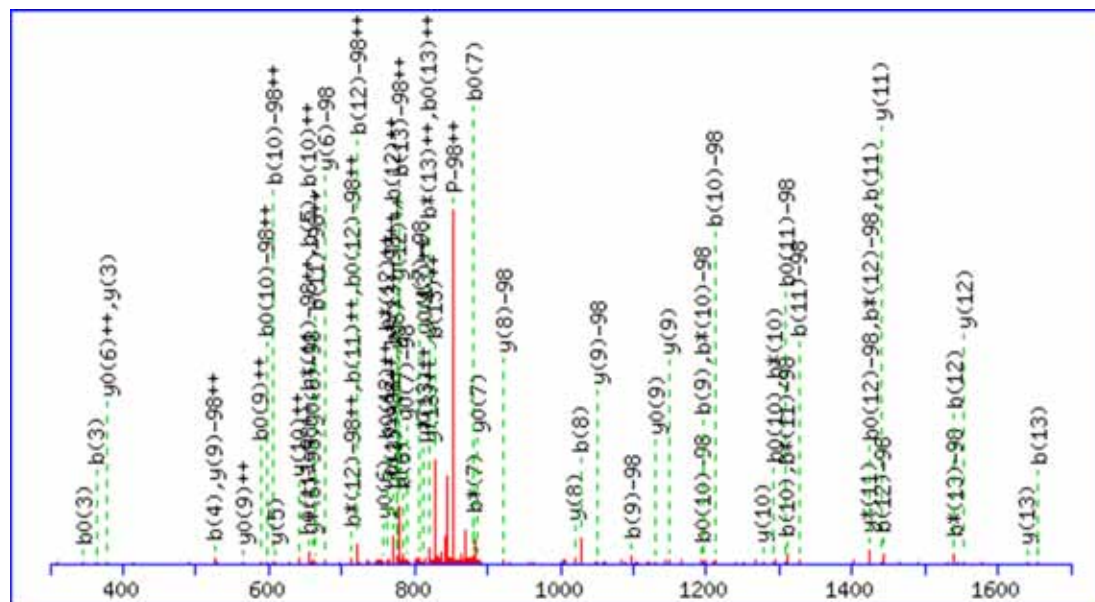

**Monoisotopic mass of neutral peptide Mr(calc):** 1802.7077

**Fixed modifications:** Carbamidomethyl (C) (apply to specified residues or termini only)

**Variable modifications:**

**N-term :** Dimethyl:2H(4)13C(2) (N-term)

**K4 :** Dimethyl:2H(4)13C(2) (K)

**S9 :** Phospho (ST), with neutral losses 97.9769(shown in table), 0.0000

**Ions Score:** 48 **Expect:** 0.00026

**Matched b ions:** b(3), b(4), b(5), b(6), b(8), b(9)-98, b(9), b(10)++, b(10), b(10)-98, b(10)-98++, b(11), b(11)-98, b(11)-98++, b(11)++, b(12), b(12)-98, b(12)++, b(12)-98++, b(13)-98++, b(13)++, b(13)

**Matched y ions:** y(3), y(5), y(6)-98, y(6), y(7)-98, y(8)-98, y(8), y(9)-98++, y(9), y(9)-98, y(10)++, y(10), y(11), y(12), y(12)++, y(13), y(13)-98++, y(13)++

**Precursor origin neutral loss:** +

## Peptide No.235

**ESSPVPSPTLDR**

**Confirmed sites:** @S:3,@S:7

**Ambiguous sites:**

MS/MS Fragmentation of **ESSPVPSPTLDR**

Found in **SPTB2\_MOUSE**, Spectrin beta chain, brain 1 OS=Mus musculus GN=Sptbn1 PE=1 SV=2

Match to Query 2308: 1471.599896 from(736.807224,2+)

Title: Elution from: 35.201 to 35.201 scan no 3017 cid35.00 polarity:+MA10





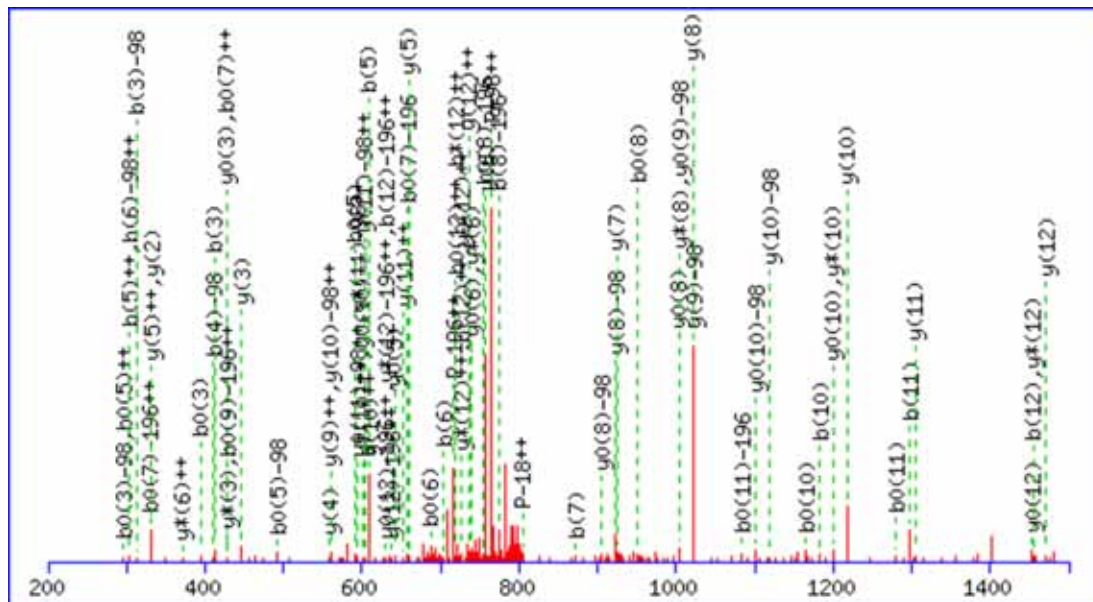

**Monoisotopic mass of neutral peptide Mr(calc): 1627.7259**

**Fixed modifications:** Carbamidomethyl (C) (apply to specified residues or termini only)

**Variable modifications:**

**N-term :** Dimethyl (N-term)

**S2 :** Phospho (ST), with neutral losses 0.0000(shown in table), 97.9769

**S7 :** Phospho (ST), with neutral losses 0.0000(shown in table), 97.9769

**K13 :** Dimethyl (K)

**Ions Score:** 37 **Expect:** 0.0075

**Matched b ions:** b(3), b(3)-98, b(4)-98, b(5), b(5)++, b(6)-98++, b(6), b(7)-98, b(7), b(8)-98, b(8)-196, b(10), b(11), b(11)-98, b(11)-98++, b(12)-98++, b(12), b(12)-196++, b(12)++

**Matched y ions:** y(2), y(3), y(4), y(5)++, y(5), y(6), y(7), y(8)-98, y(8), y(9)++, y(9)-98, y(10), y(10)-98++, y(10)++, y(10)-98, y(11), y(11)-98++, y(11)++, y(12)-98++, y(12), y(12)-196++, y(12)++

**Precursor origin neutral loss:** +

## Peptide No.237

**ESSPVPSPTLDRK**

**Confirmed sites:** @S:3,@S:7

**Ambiguous sites:**

**MS/MS Fragmentation of ESSPVPSPTLDRK**

Found in **SPTB2\_MOUSE**, Spectrin beta chain, brain 1 OS=Mus musculus GN=Sptbn1 PE=1 SV=2

Match to Query 3291: 1627.726161 from(543.582663,3+)

Title: Elution from: 30.864 to 30.864 scan no 2423 cid35.00 polarity:+:MA10



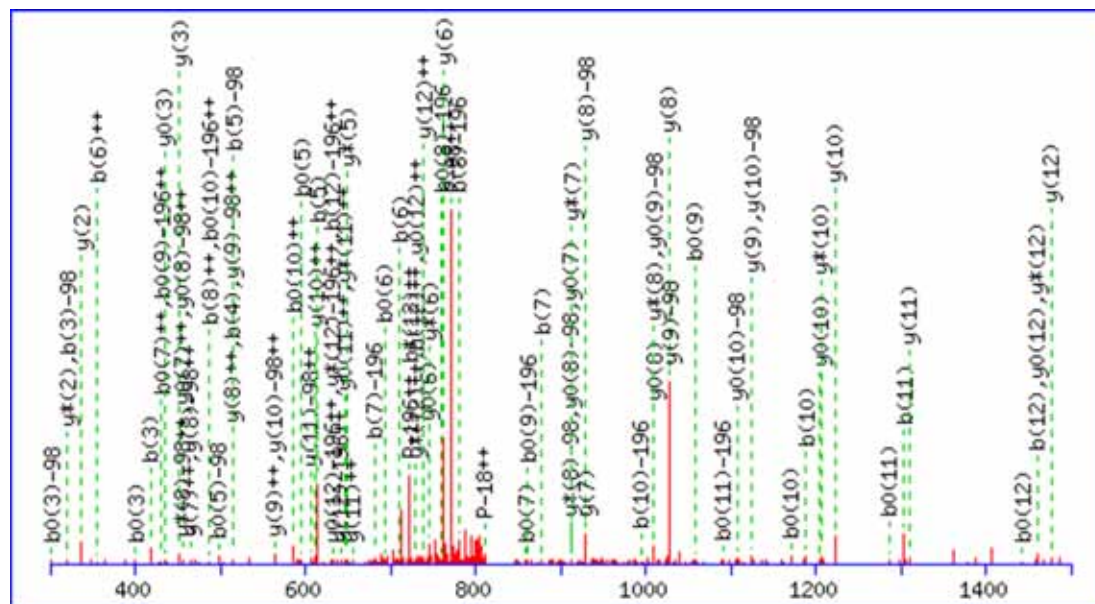

**Monoisotopic mass of neutral peptide Mr(calc):** 1639.7896

**Fixed modifications:** Carbamidomethyl (C) (apply to specified residues or termini only)

**Variable modifications:**

**N-term :** Dimethyl:2H(4)13C(2) (N-term)

**S2 :** Phospho (ST), with neutral losses 0.0000(shown in table), 97.9769

**S7 :** Phospho (ST), with neutral losses 0.0000(shown in table), 97.9769

**K13 :** Dimethyl:2H(4)13C(2) (K)

**Ions Score:** 50 **Expect:** 0.00047

**Matched b ions:** b(3), b(3)-98, b(4), b(5), b(5)-98, b(6)++, b(6), b(7)-196, b(7)-98, b(7), b(8)++, b(8)-196, b(9)-98, b(10), b(10)-98, b(10)-196, b(11), b(11)-98, b(12), b(12)-98++, b(12)-98, b(12)-196++, b(12)++

**Matched y ions:** y(2), y(3), y(6), y(7), y(7)++, y(8)-98, y(8), y(8)-98++, y(8)++, y(9)++, y(9), y(9)-98, y(9)-98++, y(10), y(10)-98++, y(10)-98, y(10)++, y(11), y(11)-98++, y(11)++, y(12)-98++, y(12), y(12)-98, y(12)-196++, y(12)++

**Precursor origin neutral loss:** +

## Peptide No.239

**ESSPVPSPTLDRK**

**Confirmed sites:** @S:3,@S:7

**Ambiguous sites:**

**MS/MS Fragmentation of** **ESSPVPSPTLDRK**

Found in **SPTB2\_MOUSE**, Spectrin beta chain, brain 1 OS=Mus musculus GN=Sptbn1 PE=1 SV=2

Match to Query 2927: 1639.790829 from(547.604219,3+)

Title: Elution from: 30.855 to 30.855 scan no 2257 cid35.00 polarity:+:MA10





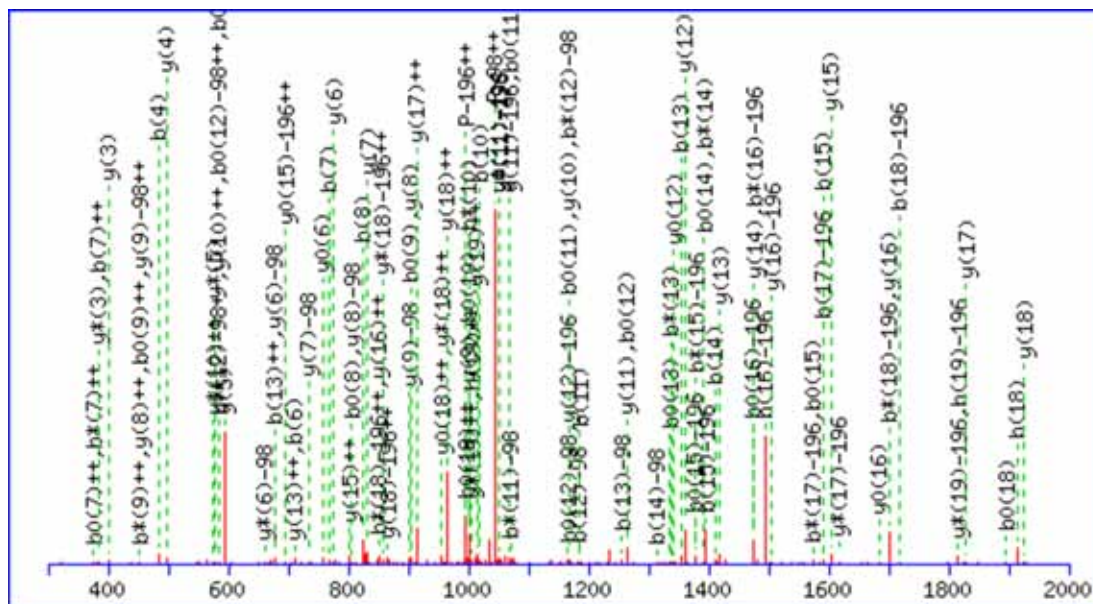

**Monoisotopic mass of neutral peptide Mr(calc):** 2183.9541

**Fixed modifications:** Carbamidomethyl (C) (apply to specified residues or termini only)

**Variable modifications:**

**N-term :** Dimethyl (N-term)

**S11 :** Phospho (ST), with neutral losses 0.0000(shown in table), 97.9769

**T15 :** Phospho (ST), with neutral losses 0.0000(shown in table), 97.9769

**K20 :** Dimethyl (K)

**Ions Score:** 85 **Expect:** 1.6e-007

**Matched b ions:** b(4), b(6), b(7)++, b(7), b(8), b(10), b(11), b(12)-98, b(13)++, b(13)-98, b(13), b(14)-98, b(14), b(15)-196, b(15)-98, b(15), b(16)-196, b(16)-98, b(17)-196, b(18)-98, b(18), b(18)-196, b(19)-196, b(19)-98, b(19)-98++, b(19)++

**Matched y ions:** y(3), y(4), y(5), y(6)-98, y(6), y(7), y(7)-98, y(8)++, y(8)-98, y(8), y(9)-98++, y(9), y(9)-98, y(10), y(10)-98, y(10)++, y(11)-98, y(11)-196, y(11), y(11)-98++, y(12)-98, y(12), y(12)-196, y(13)++, y(13), y(13)-98++, y(13)-98, y(14), y(14)-98, y(15)++, y(15), y(15)-98, y(16)-98++, y(16)-98, y(16), y(16)++, y(16)-196, y(17)++, y(17), y(17)-98++, y(18)-98++, y(18)++, y(18), y(18)-98, y(18)-196++, y(19)-98, y(19)++, y(19)-98++

**Precursor origin neutral loss:** +

## Peptide No.241

**ETPQPEGPPSPAGTPPQPK**

**Confirmed sites:** @S:11,@T:15

**Ambiguous sites:**

MS/MS Fragmentation of **ETPQPEGPPSPAGTPPQPK**

Found in **JPH2\_MOUSE**, Junctophilin-2 OS=Mus musculus GN=Jph2 PE=1 SV=2

Match to Query 5939: 2196.018810 from(733.013546,3+)

Title: Elution from: 33.055 to 33.055 scan no 2552 cid35.00 polarity:+:MA10:m1s

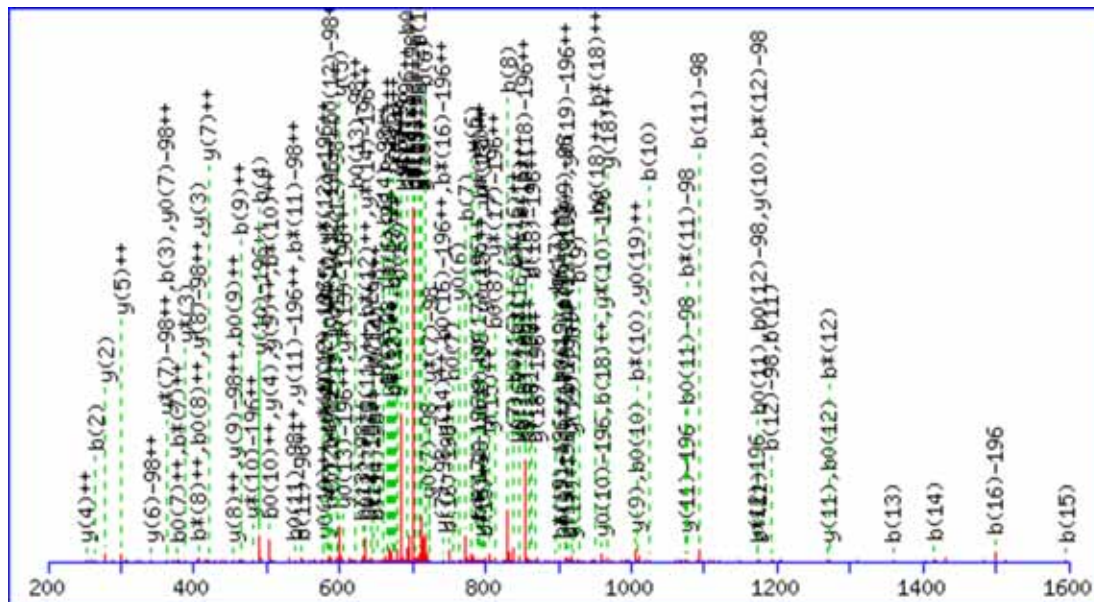

**Monoisotopic mass of neutral peptide Mr(calc):** 2196.0177

**Fixed modifications:** Carbamidomethyl (C) (apply to specified residues or termini only)

**Variable modifications:**

**N-term :** Dimethyl:2H(4)13C(2) (N-term)

**S11 :** Phospho (ST), with neutral losses 0.0000(shown in table), 97.9769

**T15 :** Phospho (ST), with neutral losses 0.0000(shown in table), 97.9769

**K20 :** Dimethyl:2H(4)13C(2) (K)

**Ions Score:** 80 **Expect:** 6.7e-007

**Matched b ions:** b(2), b(3), b(4), b(5), b(6), b(7), b(8), b(9)++, b(9), b(10), b(11)-98, b(11), b(11)-98++, b(11)++, b(12)-98, b(12)-98++, b(12)++, b(13), b(13)-98++, b(13)++, b(14), b(14)-98++, b(14)++, b(15)-98, b(15), b(15)-196++, b(15)-98++, b(15)++, b(16)-196, b(16)-98, b(16)-196++, b(16)-98++, b(16)++, b(17)-98++, b(17)++, b(18)++, b(18)-98++, b(18)-196++, b(19)-98++, b(19)-196++

**Matched y ions:** y(2), y(3), y(4), y(4)++, y(5)++, y(5), y(6)-98++, y(6), y(6)-98, y(7)++, y(7), y(7)-98, y(8)-98++, y(8), y(8)++, y(9), y(9)++, y(9)-98, y(9)-98++, y(10), y(10)-196++, y(10)++, y(10)-98, y(10)-98++, y(11), y(11)++, y(11)-98, y(11)-196, y(11)-98++, y(11)-196++, y(12)-98, y(12)-98++, y(12)++, y(12)-196, y(12)-196++, y(13)++, y(13)-98++, y(14)-98++, y(14)-196++, y(14)++, y(15)-98, y(15)++, y(15)-196++, y(16)++, y(16)-98++, y(17)++, y(17)-98++, y(18)-98++, y(18)++, y(18)-196++, y(19)-196++

**Precursor origin neutral loss:** +

## Peptide No.242

**ETPTTSPPEGVTAAPPLEIPISSK**

**Confirmed sites:** @T:2,@T:4

**Ambiguous sites:**

MS/MS Fragmentation of **ETPTTSPPEGVTAAPPLEIPISSK**

Found in **NACAM\_MOUSE**, Nascent polypeptide-associated complex subunit alpha, muscle-specific form OS=Mus musculus GN=Naca PE=1 SV=1

Match to Query 6155: 2537.198352 from(846.740060,3+)

Title: Elution from: 61.779 to 61.779 scan no 5723 cid35.00 polarity:+:MA10:m1s

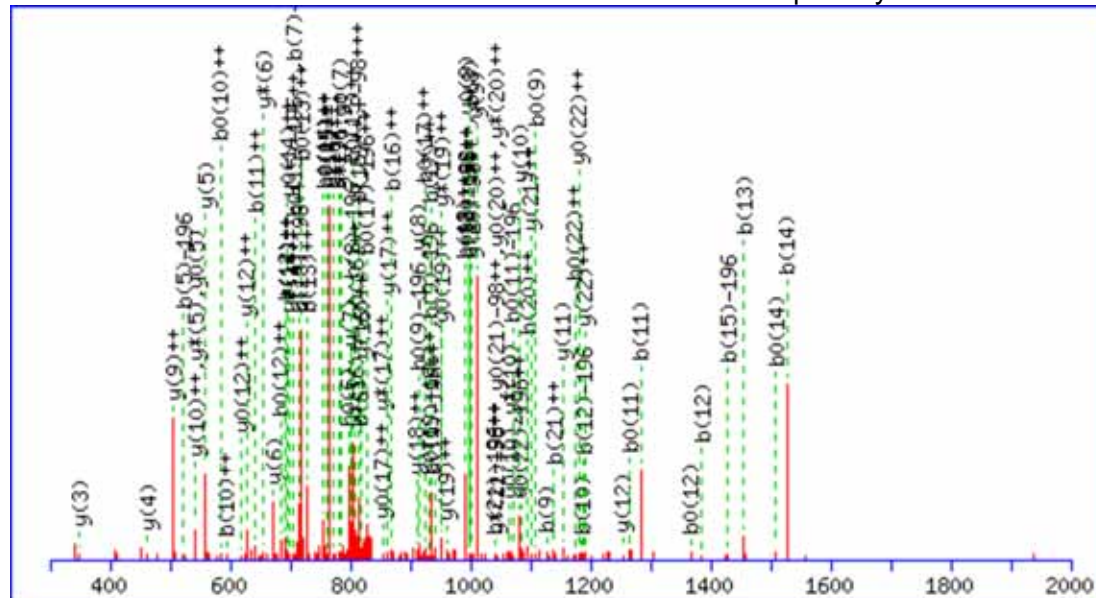

**Monoisotopic mass of neutral peptide Mr(calc):** 2537.1955

**Fixed modifications:** Carbamidomethyl (C) (apply to specified residues or termini only)

**Variable modifications:**

**N-term :** Dimethyl (N-term)

**T2 :** Phospho (ST), with neutral losses 0.0000(shown in table), 97.9769

**T4 :** Phospho (ST), with neutral losses 0.0000(shown in table), 97.9769

**K23 :** Dimethyl (K)

**Ions Score:** 47 **Expect:** 0.0016

**Matched b ions:** b(5)-196, b(6), b(7)-98, b(7)-196, b(8)-196, b(8), b(9), b(9)-196, b(10)++, b(10), b(11), b(11)-98++, b(11)++, b(12), b(12)++, b(12)-196, b(13)++, b(13), b(13)-98++, b(14)++, b(14), b(14)-98, b(14)-98++, b(15)-98++, b(15)-98, b(15)-196, b(15)-196++, b(15)++, b(16)++, b(17)++, b(17)-98++, b(18)++, b(18)-98++, b(19)-98++, b(19)-196++, b(20)++, b(20)-196++, b(21)++, b(21)-98++, b(21)-196++, b(22)-98++

**Matched y ions:** y(3), y(4), y(5), y(6), y(7), y(8), y(9)++, y(9), y(10), y(10)++, y(11), y(12)++, y(12), y(14)++, y(15)++, y(16)++, y(17)++, y(18)++, y(19)++, y(20)-98++, y(21)++, y(22)++, y(22)-98++

**Precursor origin neutral loss:**

## Peptide No.243

**ETPTTPSPEGVTAAPPLEIPISSK**

**Confirmed sites:**

**Ambiguous sites:** @T:2orT:4, @T:5

MS/MS Fragmentation of **ETPTTPSPEGVTAAPPLEIPISSK**

Found in **NACAM\_MOUSE**, Nascent polypeptide-associated complex subunit alpha, muscle-specific form OS=Mus musculus GN=Naca PE=1 SV=1

Match to Query 6657: 2537.199780 from(846.740536,3+)

Title: Elution from: 61.449 to 61.449 scan no 5847 cid35.00 polarity:+:MA10:m1s



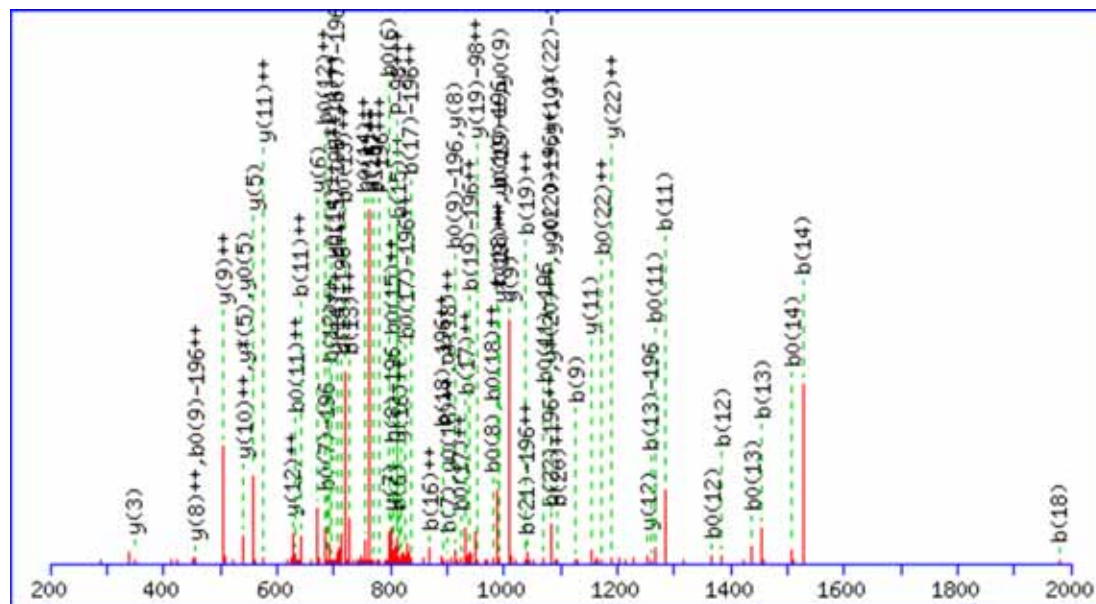

**Monoisotopic mass of neutral peptide Mr(calc):** 2537.1955

**Fixed modifications:** Carbamidomethyl (C) (apply to specified residues or termini only)

**Variable modifications:**

**N-term :** Dimethyl (N-term)

**T4 :** Phospho (ST), with neutral losses 0.0000(shown in table), 97.9769

**T5 :** Phospho (ST), with neutral losses 0.0000(shown in table), 97.9769

**K23 :** Dimethyl (K)

**Ions Score:** 62 **Expect:** 6.3e-005

**Matched b ions:** b(6), b(7)-196, b(7)-98, b(7), b(8)-196, b(8)-98, b(9), b(10)-196, b(11), b(11)++, b(12), b(12)++, b(13), b(13)++, b(13)-196, b(14)++, b(14), b(14)-98++, b(15)-98++, b(15)-98, b(15)-196++, b(15)++, b(16)++, b(17)++, b(17)-196++, b(18), b(18)++, b(18)-98++, b(18)-196++, b(19)-98++, b(19)-196++, b(19)++, b(20)++, b(21)-196++, b(21)-98++, b(22)-196++

**Matched y ions:** y(3), y(5), y(6), y(7), y(8)++, y(8), y(9)++, y(9), y(10)++, y(10), y(11), y(11)++, y(12)++, y(12), y(14)++, y(15)++, y(16)++, y(19)-98++, y(22)++

**Precursor origin neutral loss:**

## Peptide No.244

**ETPTTSPPEGVTAAPPLEIPISSK**

**Confirmed sites:** @T:5,@S:7

**Ambiguous sites:**

MS/MS Fragmentation of **ETPTTSPPEGVTAAPPLEIPISSK**

Found in **NACAM\_MOUSE**, Nascent polypeptide-associated complex subunit alpha, muscle-specific form OS=Mus musculus GN=Naca PE=1 SV=1

Match to Query 7692: 2537.196838 from(1269.605695,2+)

Title: Elution from: 61.327 to 61.327 scan no 6057 cid35.00 polarity:+:MA10:m1s

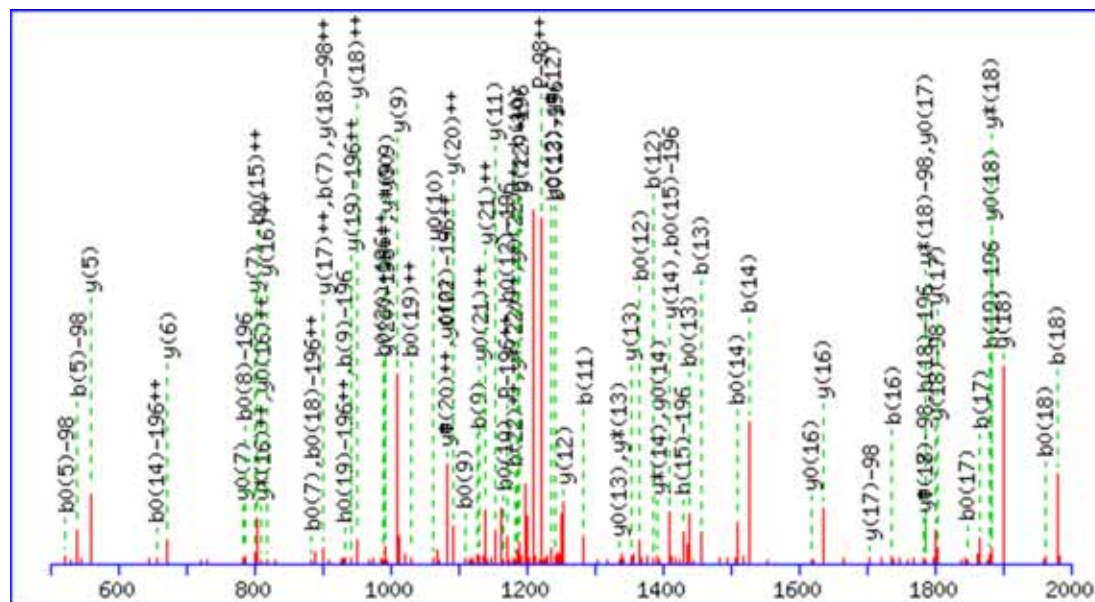

**Monoisotopic mass of neutral peptide Mr(calc):** 2537.1955

**Fixed modifications:** Carbamidomethyl (C) (apply to specified residues or termini only)

**Variable modifications:**

**N-term :** Dimethyl (N-term)

**T5 :** Phospho (ST), with neutral losses 0.0000(shown in table), 97.9769

**S7 :** Phospho (ST), with neutral losses 0.0000(shown in table), 97.9769

**K23 :** Dimethyl (K)

**Ions Score:** 67 **Expect:** 1.5e-005

**Matched b ions:** b(5)-98, b(7)-98, b(7), b(8)-98, b(9)-98, b(9)-196, b(9), b(10), b(11), b(11)-98, b(12)-196, b(12), b(13), b(13)-98, b(14), b(14)-98, b(15)-98, b(15)-196, b(16), b(17)-98++, b(17), b(17)-98, b(18), b(18)-196, b(18)-98, b(19)-98, b(19)-196, b(22)++

**Matched y ions:** y(5), y(6), y(7), y(9), y(10), y(11), y(12), y(13), y(14), y(16), y(16)++, y(17)++, y(17), y(17)-98, y(18)-98++, y(18)-98, y(18), y(18)++, y(19)-98++, y(19)-98, y(19)-196++, y(20)++, y(20)-196++, y(21)-98++, y(21)++, y(22)-98++, y(22)++

**Precursor origin neutral loss:** +

## Peptide No.245

**ETPTTSPPEGVTAAPPLEIPISSK**

**Confirmed sites:** @T:2

**Ambiguous sites:** @T:4orT:5

MS/MS Fragmentation of **ETPTTSPPEGVTAAPPLEIPISSK**

Found in **NACAM\_MOUSE**, Nascent polypeptide-associated complex subunit alpha, muscle-specific form OS=Mus musculus GN=Naca PE=1 SV=1

Match to Query 6073: 2549.262828 from(850.761552,3+)

Title: Elution from: 61.066 to 61.066 scan no 5538 cid35.00 polarity:+:MA10:m1s

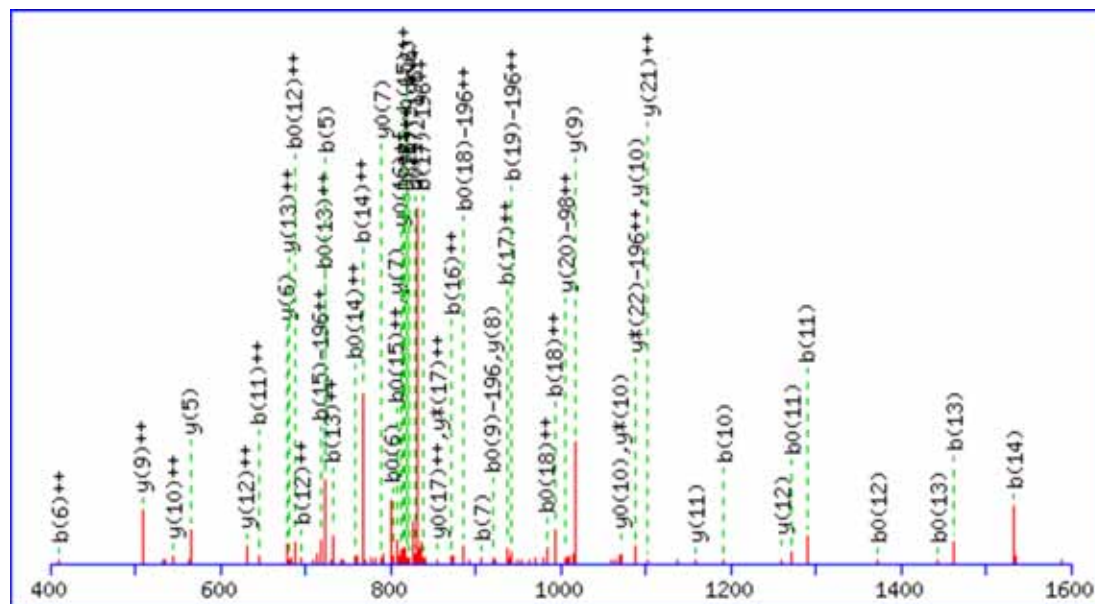

**Monoisotopic mass of neutral peptide Mr(calc):** 2549.2591

**Fixed modifications:** Carbamidomethyl (C) (apply to specified residues or termini only)

**Variable modifications:**

**N-term :** Dimethyl:2H(4)13C(2) (N-term)

**T2 :** Phospho (ST), with neutral losses 0.0000(shown in table), 97.9769

**T4 :** Phospho (ST), with neutral losses 0.0000(shown in table), 97.9769

**K23 :** Dimethyl:2H(4)13C(2) (K)

**Ions Score:** 37 **Expect:** 0.018

**Matched b ions:** b(5), b(6)++, b(6)-98, b(6), b(7)-98, b(7), b(8)-98, b(10), b(11), b(11)-98, b(11)++, b(12)++, b(13), b(13)++, b(13)-98++, b(14)++, b(14), b(14)-98++, b(15)-98++, b(15)-98, b(15)-196++, b(15)++, b(16)++, b(17)++, b(17)-196++, b(18)++, b(19)-98++, b(19)-196++, b(22)-98++

**Matched y ions:** y(5), y(6), y(7), y(8), y(9)++, y(9), y(10)++, y(10), y(11), y(12)++, y(12), y(13)++, y(16)++, y(20)-98++, y(21)++

**Precursor origin neutral loss:**

## Peptide No.246

**ETPTTSPPEGVTAAPPLEIPISSK**

**Confirmed sites:**

**Ambiguous sites:** @T:4orT:5, @T:4orT:5

MS/MS Fragmentation of **ETPTTSPPEGVTAAPPLEIPISSK**

Found in **NACAM\_MOUSE**, Nascent polypeptide-associated complex subunit alpha, muscle-specific form OS=Mus musculus GN=Naca PE=1 SV=1

Match to Query 6197: 2549.262867 from(850.761565,3+)

Title: Elution from: 61.409 to 61.409 scan no 5689 cid35.00 polarity:+:MA10:m1s

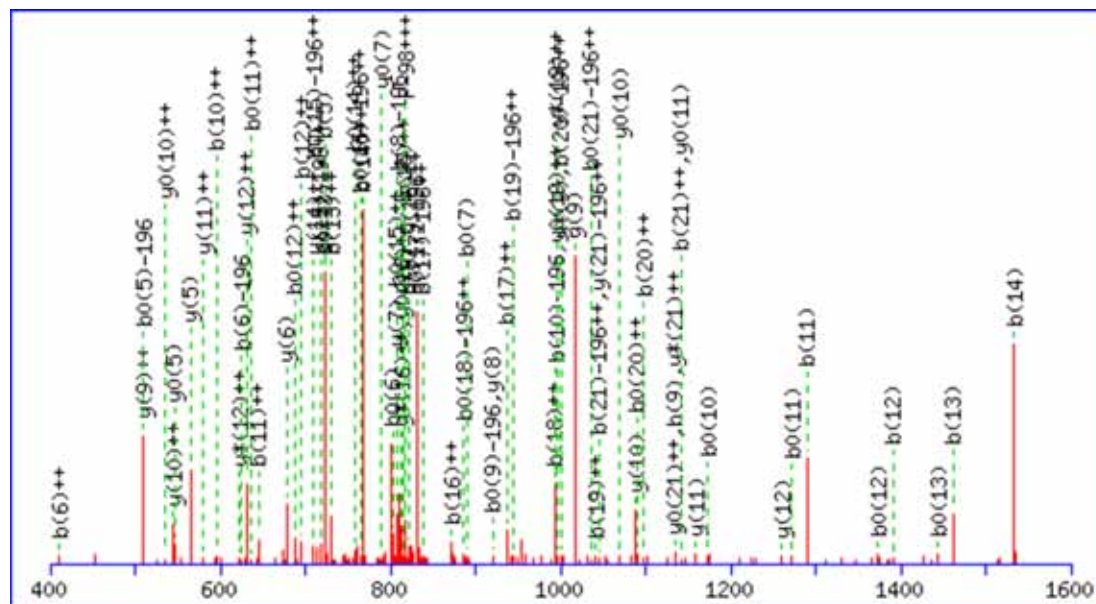

**Monoisotopic mass of neutral peptide Mr(calc):** 2549.2591

**Fixed modifications:** Carbamidomethyl (C) (apply to specified residues or termini only)

**Variable modifications:**

**N-term :** Dimethyl:2H(4)13C(2) (N-term)

**T4 :** Phospho (ST), with neutral losses 0.0000(shown in table), 97.9769

**T5 :** Phospho (ST), with neutral losses 0.0000(shown in table), 97.9769

**K23 :** Dimethyl:2H(4)13C(2) (K)

**Ions Score:** 53 **Expect:** 0.00042

**Matched b ions:** b(5), b(5)-98, b(6)-98, b(6)++, b(6), b(6)-196, b(7)-98, b(8)-196, b(9), b(9)-98, b(10)++, b(10)-196, b(10)-98++, b(11), b(11)++, b(11)-98++, b(12), b(12)++, b(13), b(13)-98, b(13)++, b(14)++, b(14), b(14)-98++, b(15)-98++, b(15)-98, b(15)-196++, b(15)++, b(16)++, b(16)-98++, b(17)++, b(17)-196++, b(17)-98++, b(18)++, b(18)-98++, b(19)-98++, b(19)-196++, b(19)++, b(20)-196++, b(20)++, b(21)++, b(21)-196++

**Matched y ions:** y(5), y(6), y(7), y(8), y(9)++, y(9), y(10)++, y(10), y(11), y(11)++, y(12)++, y(12), y(14)++, y(16)++, y(21)-196++

**Precursor origin neutral loss:**

## Peptide No.247

**ETPTTSPPEGVTAAPPLEIPISSK**

**Confirmed sites:** @T:5,@S:7

**Ambiguous sites:**

MS/MS Fragmentation of **ETPTTSPPEGVTAAPPLEIPISSK**

Found in **NACAM\_MOUSE**, Nascent polypeptide-associated complex subunit alpha, muscle-specific form OS=Mus musculus GN=Naca PE=1 SV=1

Match to Query 6686: 2549.261666 from(1275.638109,2+)

Title: Elution from: 61.217 to 61.217 scan no 5828 cid35.00 polarity:+:MA10:m1s



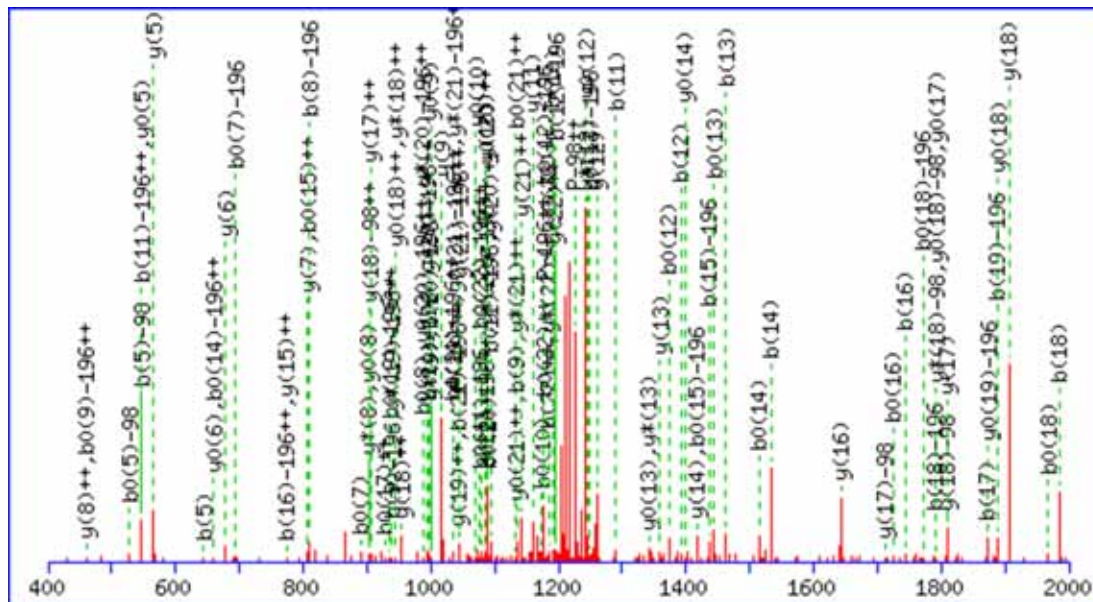

**Monoisotopic mass of neutral peptide Mr(calc):** 2549.2591

**Fixed modifications:** Carbamidomethyl (C) (apply to specified residues or termini only)

**Variable modifications:**

**N-term :** Dimethyl:2H(4)13C(2) (N-term)

**T5 :** Phospho (ST), with neutral losses 0.0000(shown in table), 97.9769

**S7 :** Phospho (ST), with neutral losses 0.0000(shown in table), 97.9769

**K23 :** Dimethyl:2H(4)13C(2) (K)

**Ions Score:** 50 **Expect:** 0.0009

**Matched b ions:** b(5)-98, b(5), b(7)-98, b(8)-196, b(9)-98, b(9)-196, b(9), b(10)-196, b(10)-98++, b(10)-98, b(10), b(11)-196, b(11)-196++, b(11)-98, b(11), b(12)-196, b(12), b(13), b(13)-98, b(14), b(14)-98, b(15)-98, b(15)-196, b(16), b(16)-196++, b(17), b(18), b(18)-98, b(18)-196, b(19)-98, b(19)-196, b(20)-196++, b(21)-196++, b(21)-98++, b(22)-196++, b(22)++

**Matched y ions:** y(5), y(6), y(7), y(8)++, y(9), y(10), y(11), y(12), y(13), y(14), y(15)++, y(16), y(17), y(17)++, y(17)-98, y(18)-98, y(18), y(18)++, y(18)-98++, y(19)-98++, y(19)++, y(19)-98, y(20)++, y(20)-98++, y(20)-196++, y(21)-98++, y(21)-196++, y(21)++, y(22)++

**Precursor origin neutral loss:** +

## Peptide No.248

**ETSPSPLSPEVEHR**

**Confirmed sites:** @S:5

**Ambiguous sites:**

**MS/MS Fragmentation of ETSPSPLSPEVEHR**

Found in **CMYA5\_MOUSE**, Cardiomyopathy-associated protein 5 OS=Mus musculus GN=Cmya5 PE=1 SV=2

Match to Query 3551: 1671.750270 from(558.257366,3+)

Title: Elution from: 31.058 to 31.058 scan no 2451 cid35.00 polarity:+:MA10



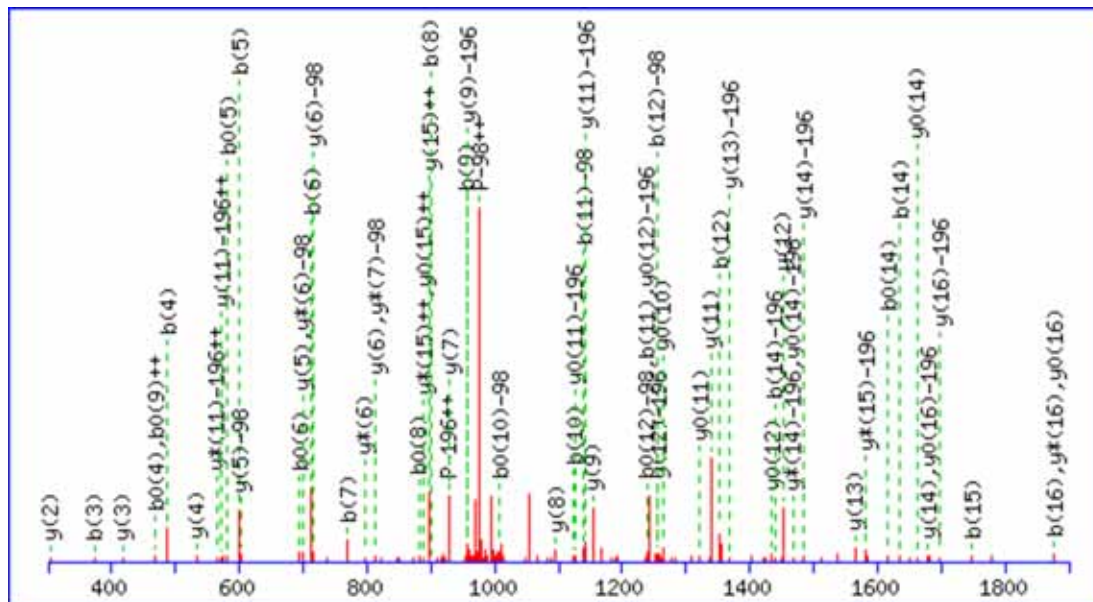

**Monoisotopic mass of neutral peptide Mr(calc):** 2050.7908

**Fixed modifications:** Carbamidomethyl (C) (apply to specified residues or termini only)

**Variable modifications:**

**N-term :** Dimethyl (N-term)

**S10 :** Phospho (ST), with neutral losses 0.0000(shown in table), 97.9769

**S13 :** Phospho (ST), with neutral losses 0.0000(shown in table), 97.9769

**K17 :** Dimethyl (K)

**Ions Score:** 74 **Expect:** 9.9e-007

**Matched b ions:** b(3), b(4), b(5), b(6), b(7), b(8), b(9), b(10), b(11)-98, b(11), b(12), b(12)-98, b(13)-98, b(14)-98, b(14), b(14)-196, b(15), b(15)-98, b(16)-98, b(16)

**Matched y ions:** y(2), y(3), y(4), y(5)-98, y(5), y(6), y(6)-98, y(7), y(8), y(8)-98, y(9)-98, y(9), y(9)-196, y(10)-98, y(11)-98, y(11), y(11)-196, y(11)-196++, y(12), y(12)-98, y(12)-196, y(13), y(13)-98, y(13)-196, y(14), y(14)-98, y(14)-196, y(15)++, y(15)-98, y(16)-98, y(16)-196

**Precursor origin neutral loss:** +

## Peptide No.250

**EVDDILGEGSDDSDIEK**

**Confirmed sites:** @S:10,@S:13

**Ambiguous sites:**

MS/MS Fragmentation of **EVDDILGEGSDDSDIEK**

Found in **CTDP1\_MOUSE**, RNA polymerase II subunit A C-terminal domain phosphatase OS=Mus musculus GN=Ctdp1 PE=1 SV=1

Match to Query 5305: 2062.856282 from(1032.435417,2+)

Title: Elution from: 53.442 to 53.442 scan no 5062 cid35.00 polarity:+:MA10:m1s

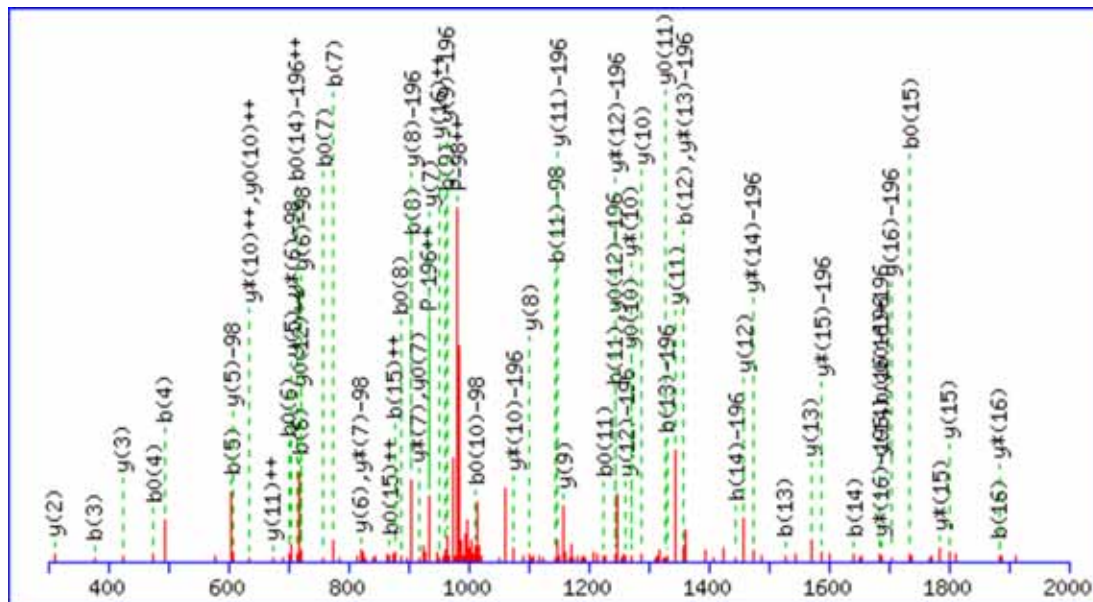

**Monoisotopic mass of neutral peptide Mr(calc):** 2062.8545

**Fixed modifications:** Carbamidomethyl (C) (apply to specified residues or termini only)

**Variable modifications:**

**N-term :** Dimethyl:2H(4)13C(2) (N-term)

**S10 :** Phospho (ST), with neutral losses 0.0000(shown in table), 97.9769

**S13 :** Phospho (ST), with neutral losses 0.0000(shown in table), 97.9769

**K17 :** Dimethyl:2H(4)13C(2) (K)

**Ions Score:** 56 **Expect:** 9e-005

**Matched b ions:** b(3), b(4), b(5), b(6), b(7), b(8), b(9), b(11), b(11)-98, b(12), b(13)-98++, b(13), b(13)-196, b(14), b(14)-98, b(14)-196, b(15)-98, b(15)++, b(15)-98++, b(16)-98, b(16), b(16)-196  
**Matched y ions:** y(2), y(3), y(5), y(5)-98, y(6), y(6)-98, y(7), y(8)-196, y(8)-98, y(8), y(9)-98, y(9), y(9)-196, y(10), y(10)-98, y(11)-98, y(11), y(11)-196, y(11)++, y(12), y(12)-98, y(12)-196, y(13), y(13)-98, y(14), y(14)-98, y(15), y(16)-98, y(16)-196, y(16)++  
**Precursor origin neutral loss:** +

## Peptide No.251

**EVLSQGSESFEHIR**

**Confirmed sites: @S:9**

**Ambiguous sites:**

MS/MS Fragmentation of **EVLSQGSESFEHIR**

Found in **CMYA5\_MOUSE**, Cardiomyopathy-associated protein 5 OS=Mus musculus GN=Cmya5 PE=1 SV=2

Match to Query 3893: 1724.777952 from(575.933260,3+)

Title: Elution from: 39.982 to 39.982 scan no 3663 cid35.00 polarity:+:MA10



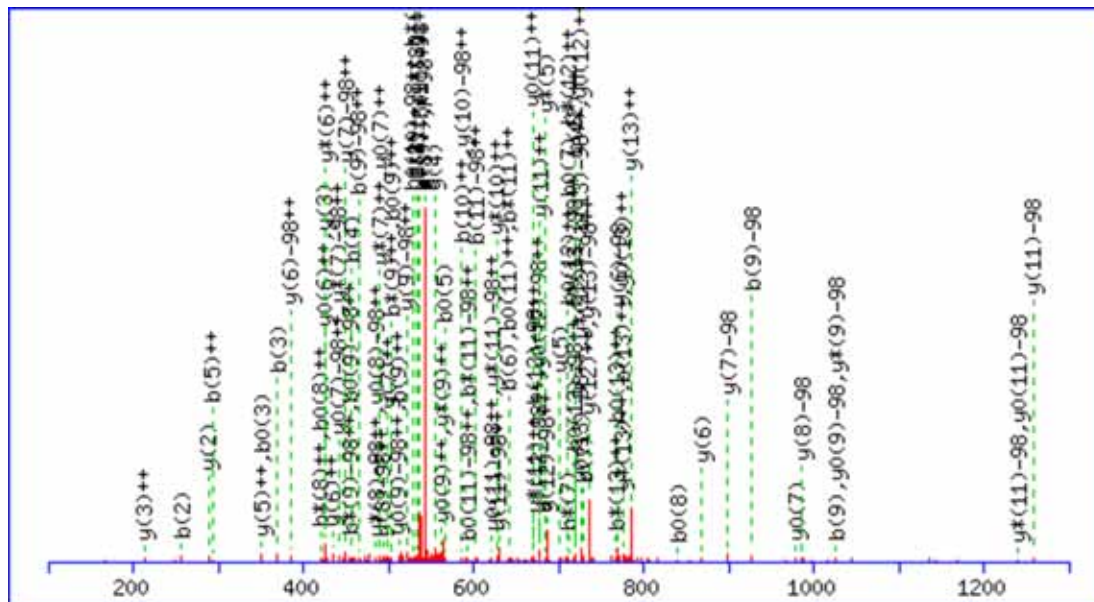

**Monoisotopic mass of neutral peptide Mr(calc): 1724.7771**

**Fixed modifications:** Carbamidomethyl (C) (apply to specified residues or termini only)

**Variable modifications:**

**N-term :** Dimethyl (N-term)

**S9 :** Phospho (ST), with neutral losses 97.9769(shown in table), 0.0000

**Ions Score:** 48 **Expect:** 0.00065

**Matched b ions:** b(2), b(3), b(4), b(5)++, b(6), b(7), b(9), b(9)-98, b(9)-98++, b(9)++, b(10)-98++, b(10)++, b(11)-98++, b(12)++, b(12)-98++, b(13)++, b(13)-98++

**Matched y ions:** y(2), y(3), y(3)++, y(4), y(5)++, y(5), y(6)-98, y(6)++, y(6), y(6)-98++, y(7)-98, y(7)-98++, y(7)++, y(8)++, y(8)-98, y(8)-98++, y(9)-98++, y(10)-98++, y(11)-98++, y(11)-98, y(11)++, y(12)++, y(12)-98++, y(13)-98++, y(13)++

**Precursor origin neutral loss:** +

## Peptide No.252

**FDDELVESSLAKSSTR**

**Confirmed sites:** @S:8,@S:14,@T:15

**Ambiguous sites:**

**MS/MS Fragmentation of FDDELVESSLAKSSTR**

Found in MCRS1\_MOUSE, Microspherule protein 1 OS=Mus musculus GN=Mcrs1 PE=1 SV=1

Match to Query 5918: 2056.820076 from(515.212295,4+)

Title: Elution from: 34.759 to 34.759 scan no 2955 cid35.00 polarity:+:MA10

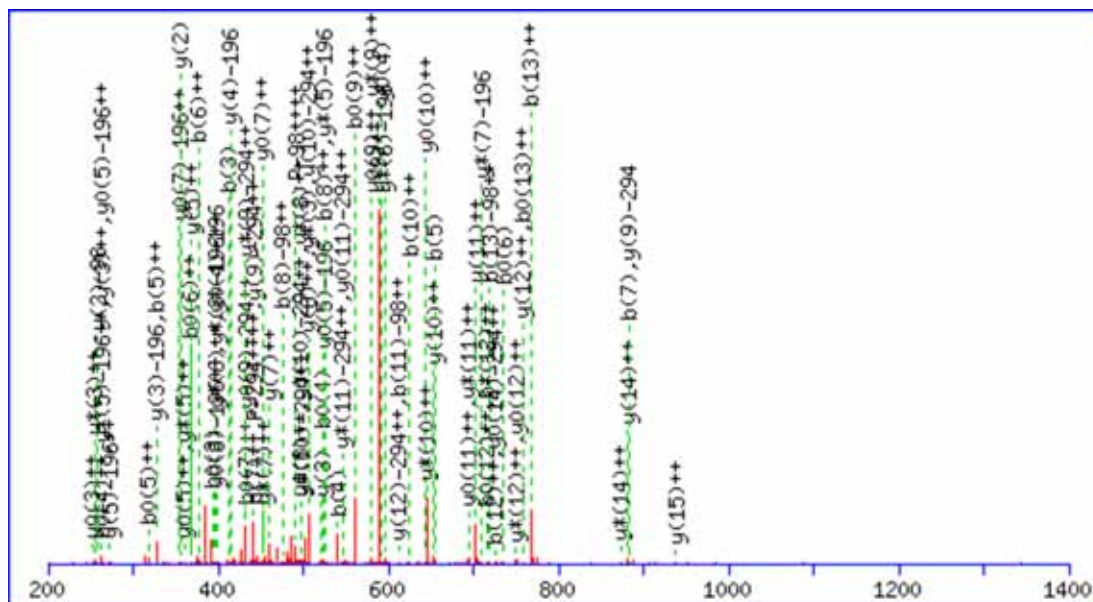

**Monoisotopic mass of neutral peptide Mr(calc):** 2056.8256

**Fixed modifications:** Carbamidomethyl (C) (apply to specified residues or termini only)

**Variable modifications:**

**N-term :** Dimethyl:2H(4)13C(2) (N-term)

**S8 :** Phospho (ST), with neutral losses 0.0000(shown in table), 97.9769

**S14 :** Phospho (ST), with neutral losses 0.0000(shown in table), 97.9769

**T15 :** Phospho (ST), with neutral losses 0.0000(shown in table), 97.9769

**Ions Score:** 30 **Expect:** 0.031

**Matched b ions:** b(3), b(4), b(5)++, b(5), b(6)++, b(7)++, b(7), b(8)-98++, b(8)++, b(10)++, b(11)-98++, b(12)++, b(13)++, b(13)-98++

**Matched y ions:** y(2)-98, y(2), y(3)++, y(3)-196, y(3), y(4)-196, y(5)-196++, y(5)++, y(6)-98++, y(7)++, y(7)-98++, y(8)++, y(8)-98++, y(9)-294++, y(9)++, y(9)-98++, y(9)-294, y(9)-196++, y(10)-294++, y(10)++, y(11)++, y(11)-98++, y(12)-294++, y(12)++, y(13)-98++, y(14)++, y(15)++

**Precursor origin neutral loss:**

## Peptide No.253

**FDSLEDSPEEREPLQK**

**Confirmed sites: @S:3**

**Ambiguous sites:**

MS/MS Fragmentation of **FDSLEDSPEEREPLQK**

Found in **CF057\_MOUSE**, UPF0369 protein C6orf57 homolog OS=Mus musculus PE=2 SV=2

Match to Query 6809: 2065.989147 from(689.670325,3+)

Title: Elution from: 38.891 to 38.891 scan no 3481 cid35.00 polarity:+:MA10:m1s

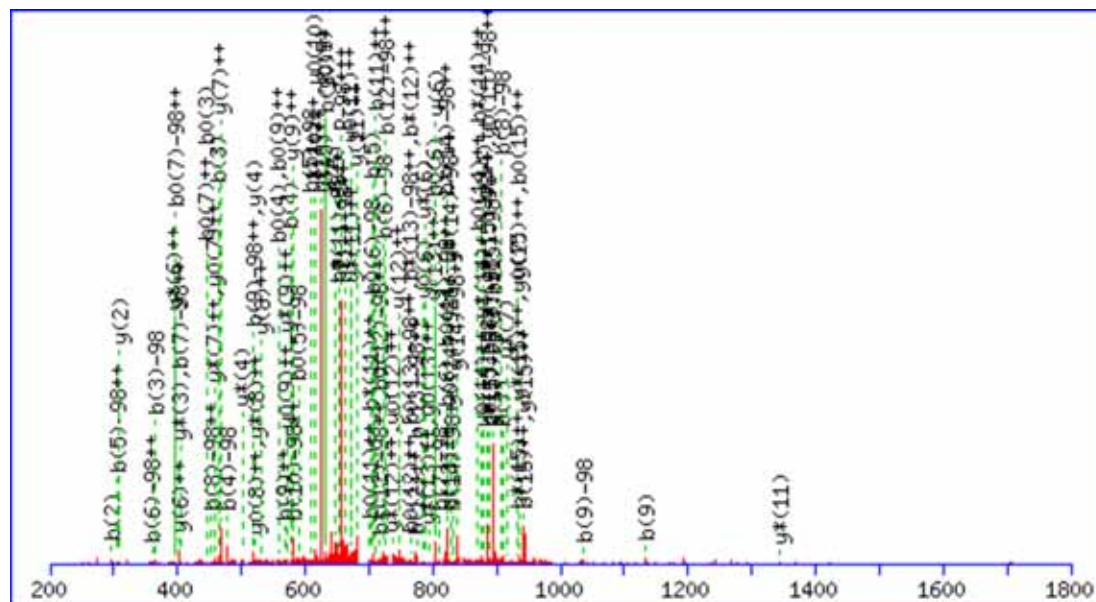

**Monoisotopic mass of neutral peptide Mr(calc):** 2065.9881

**Fixed modifications:** Carbamidomethyl (C) (apply to specified residues or termini only)

**Variable modifications:**

**N-term :** Dimethyl:2H(4)13C(2) (N-term)

**S3 :** Phospho (ST), with neutral losses 97.9769(shown in table), 0.0000

**K16 :** Dimethyl:2H(4)13C(2) (K)

**Ions Score:** 32 **Expect:** 0.045

**Matched b ions:** b(2), b(3)-98, b(3), b(4)-98, b(4), b(5)-98++, b(5)-98, b(5), b(6), b(6)-98++, b(6)-98, b(7), b(7)-98++, b(7)-98, b(8)-98, b(8)-98++, b(9), b(9)-98++, b(9)-98, b(9)++, b(10)-98++, b(10)++, b(11)-98++, b(11)++, b(12)++, b(12)-98++, b(13)-98++, b(13)++, b(14)-98++, b(14)++, b(15)-98++, b(15)++

**Matched y ions:** y(2), y(4), y(5), y(6)++, y(6), y(7)++, y(7), y(8)++, y(9)++, y(10)++, y(11)++, y(12)++, y(13)++, y(14)-98++, y(14)++, y(15)-98++, y(15)++

**Precursor origin neutral loss:** +

## Peptide No.254

**FGESSEVEMEVESEDEEDQEK**

**Confirmed sites:** @S:13

**Ambiguous sites:**

MS/MS Fragmentation of **FGESSEVEMEVESEDEEDQEK**

Found in **SF3A1\_MOUSE**, Splicing factor 3A subunit 1 OS=Mus musculus GN=Sf3a1 PE=1 SV=1

Match to Query 7633: 2524.959946 from(1263.487249,2+)

Title: Elution from: 48.396 to 48.396 scan no 4718 cid35.00 polarity:+:MA10:m1s





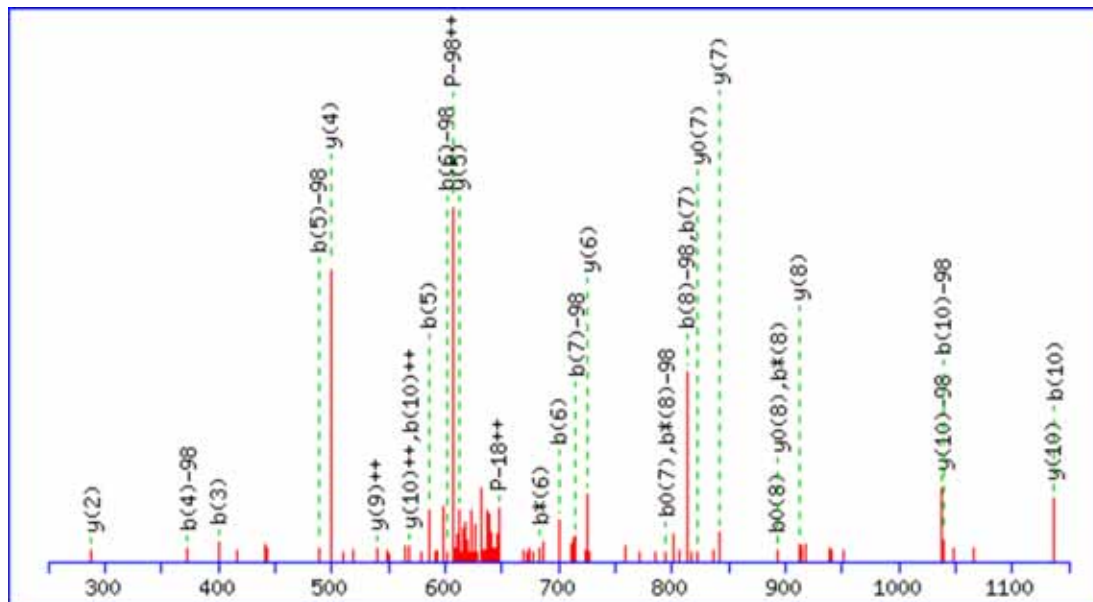

**Monoisotopic mass of neutral peptide Mr(calc):** 1310.6271

**Fixed modifications:** Carbamidomethyl (C) (apply to specified residues or termini only)

**Variable modifications:**

**N-term :** Dimethyl (N-term)

**S3 :** Phospho (ST), with neutral losses 97.9769(shown in table), 0.0000

**K11 :** Dimethyl (K)

**Ions Score:** 37 **Expect:** 0.0055

**Matched b ions:** b(3), b(4)-98, b(5), b(5)-98, b(6), b(6)-98, b(7), b(7)-98, b(8)-98, b(10)-98, b(10), b(10)++

**Matched y ions:** y(2), y(4), y(5), y(6), y(7), y(8), y(9)++, y(10)-98, y(10), y(10)++

**Precursor origin neutral loss:** +

## Peptide No.256

**FHDSEGGDTEETEDYR**

**Confirmed sites:** @S:4

**Ambiguous sites:**

MS/MS Fragmentation of **FHDSEGGDTEETEDYR**

Found in **BCLF1\_MOUSE**, Bcl-2-associated transcription factor 1 OS=Mus musculus GN=Bclaf1 PE=1 SV=2

Match to Query 5813: 2051.729240 from(1026.871896,2+)

Title: Elution from: 30.942 to 30.942 scan no 2435 cid35.00 polarity:+:MA10:m1s



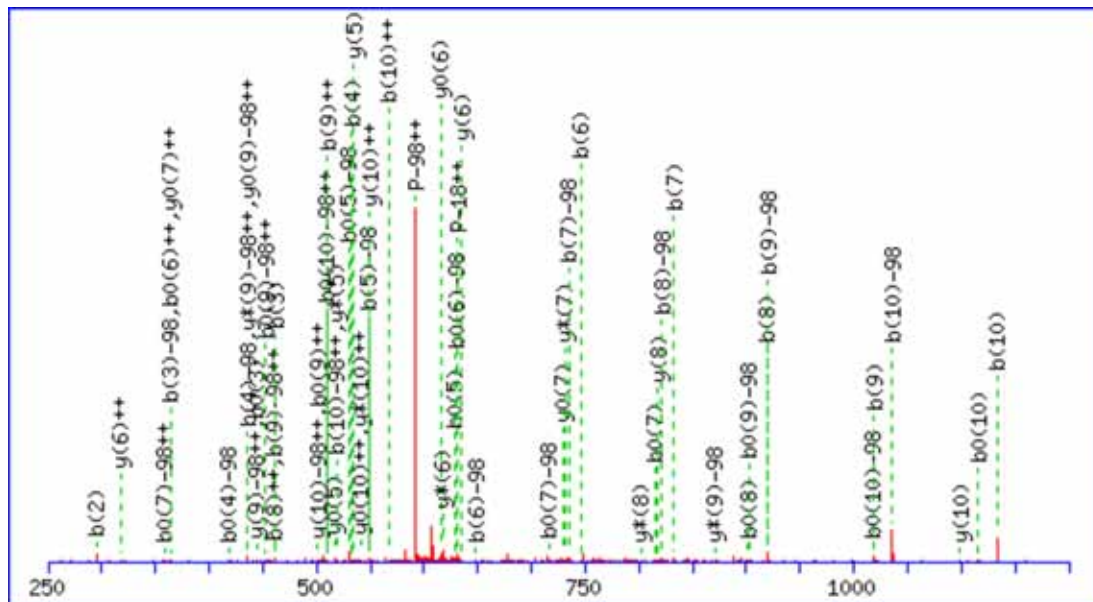

**Monoisotopic mass of neutral peptide Mr(calc):** 1278.6685

**Fixed modifications:** Carbamidomethyl (C) (apply to specified residues or termini only)

**Variable modifications:**

**N-term :** Dimethyl:2H(4)13C(2) (N-term)

**S3 :** Phospho (ST), with neutral losses 97.9769(shown in table), 0.0000

**Ions Score:** 33 **Expect:** 0.023

**Matched b ions:** b(2), b(3), b(3)-98, b(4)-98, b(4), b(5)-98, b(6)-98, b(6), b(7), b(7)-98, b(8)-98, b(8), b(8)++, b(9)-98, b(9), b(9)++, b(9)-98++, b(10)-98, b(10), b(10)-98++, b(10)++

**Matched y ions:** y(5), y(6)++, y(6), y(8), y(9)-98++, y(10), y(10)-98++, y(10)++

**Precursor origin neutral loss:** +

## Peptide No.258

**FNSESESSSSPSSPDGSGPSTK**

**Confirmed sites:** @S:3,@T:21

**Ambiguous sites:**

MS/MS Fragmentation of **FNSESESSSSPSSPDGSGPSTK**

Found in **HIRP3\_MOUSE**, HIRA-interacting protein 3 OS=Mus musculus GN=Hirip3 PE=1 SV=1

Match to Query 7243: 2372.895696 from(791.972508,3+)

Title: Elution from: 44.941 to 44.941 scan no 4297 cid35.00 polarity:+:MA10

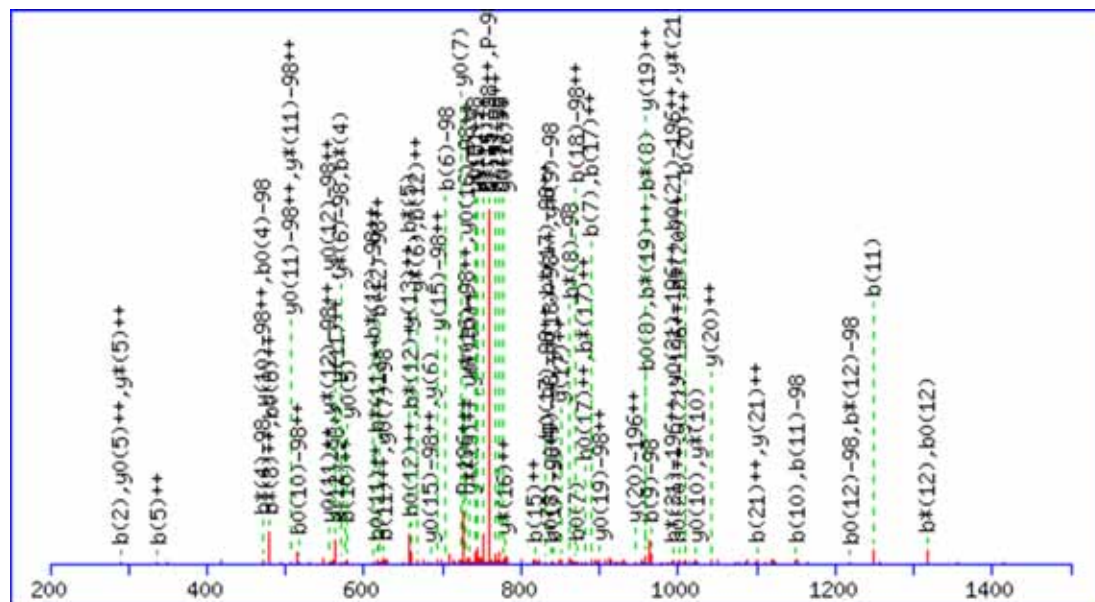

**Monoisotopic mass of neutral peptide Mr(calc):** 2372.8934

**Fixed modifications:** Carbamidomethyl (C) (apply to specified residues or termini only)

**Variable modifications:**

**N-term :** Dimethyl (N-term)

**S3 :** Phospho (ST), with neutral losses 0.0000(shown in table), 97.9769

**T21 :** Phospho (ST), with neutral losses 0.0000(shown in table), 97.9769

**K22 :** Dimethyl (K)

**Ions Score:** 27 **Expect:** 0.049

**Matched b ions:** b(2), b(5)++, b(6)-98, b(7), b(9)-98, b(10), b(10)++, b(11), b(11)++, b(11)-98, b(12)++, b(12)-98++, b(14)++, b(15)++, b(15)-98++, b(17)++, b(17)-98++, b(18)-98++, b(20)++, b(21)-98++, b(21)++

**Matched y ions:** y(6), y(8)-98, y(10)-98++, y(11)++, y(12)-98++, y(13)++, y(15)++, y(15)-98++, y(17)++, y(19)++, y(20)++, y(20)-98++, y(20)-196++, y(21)-98++, y(21)++, y(21)-196++

**Precursor origin neutral loss:** +

## Peptide No.259

**FTLSGVDGDSWSSGED**

**Confirmed sites:** @S:12,@S:13

**Ambiguous sites:**

**MS/MS Fragmentation of FTLSGVDGDSWSSGED**

Found in **NEST\_MOUSE**, Nestin OS=Mus musculus GN=Nes PE=1 SV=1

Match to Query 4627: 1845.639526 from(923.827039,2+)

Title: Elution from: 71.337 to 71.337 scan no 6852 cid35.00 polarity:+:MA10:m1s



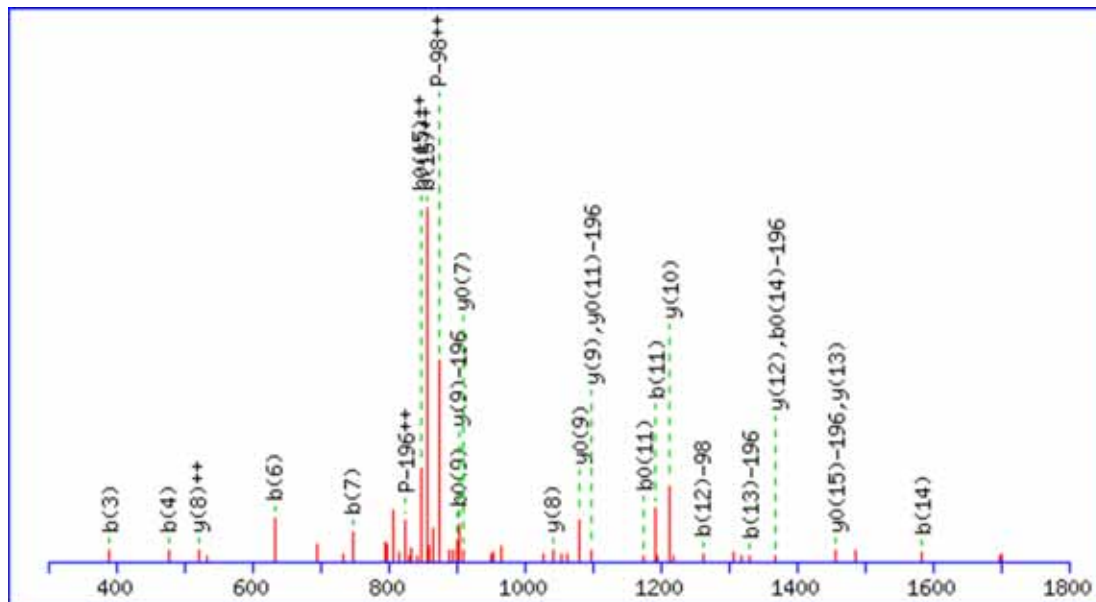

**Monoisotopic mass of neutral peptide Mr(calc):** 1845.6384

**Fixed modifications:** Carbamidomethyl (C) (apply to specified residues or termini only)

**Variable modifications:**

**N-term :** Dimethyl (N-term)

**S12 :** Phospho (ST), with neutral losses 0.0000(shown in table), 97.9769

**S13 :** Phospho (ST), with neutral losses 0.0000(shown in table), 97.9769

**Ions Score:** 38 **Expect:** 0.0013

**Matched b ions:** b(3), b(4), b(6), b(7), b(11), b(12)-98, b(13)-196, b(14)-98, b(14), b(15)++, b(15)-98++

**Matched y ions:** y(7)-98, y(8)++, y(8), y(9), y(9)-196, y(10), y(12), y(13)

**Precursor origin neutral loss:** +

## Peptide No.260

**GASAATGIPLESDSDNDNDNDLENENCMHTN**

**Confirmed sites:** @S:12

**Ambiguous sites:**

MS/MS Fragmentation of **GASAATGIPLESDSDNDNDNDLENENCMHTN**

Found in **UBP15\_MOUSE**, Ubiquitin carboxyl-terminal hydrolase 15 OS=Mus musculus GN=Usp15  
PE=2 SV=1

Match to Query 8822: 3572.346030 from(1191.789286,3+)

Title: Elution from: 44.786 to 44.786 scan no 4279 cid35.00 polarity:+:MA10:m1s

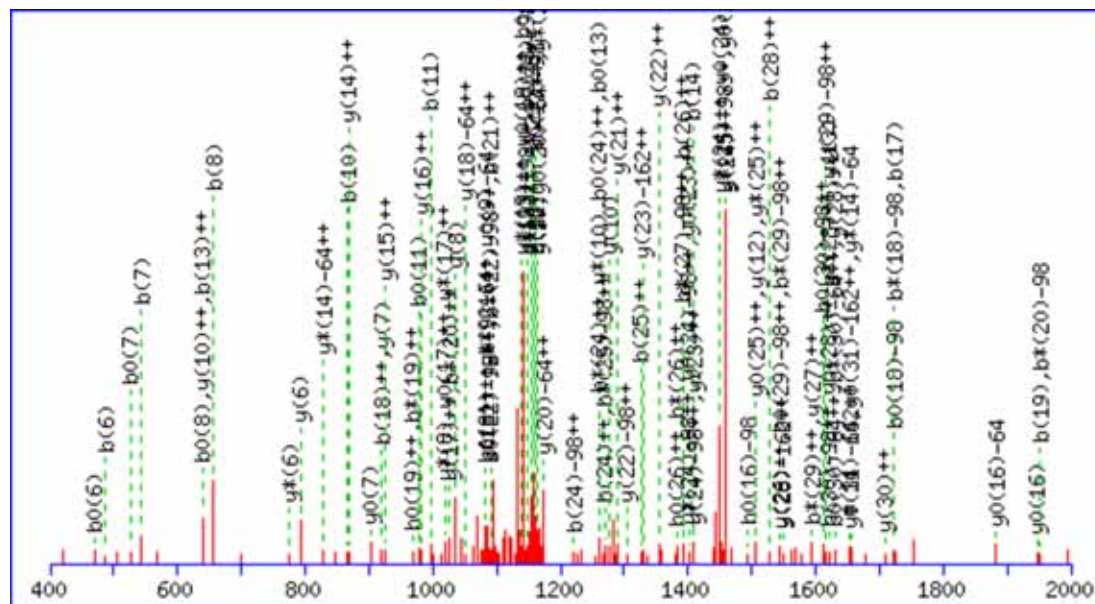

**Monoisotopic mass of neutral peptide Mr(calc):** 3572.3464

**Fixed modifications:** Carbamidomethyl (C) (apply to specified residues or termini only)

**Variable modifications:**

**N-term :** Dimethyl (N-term)

**S12 :** Phospho (ST), with neutral losses 0.0000(shown in table), 97.9769

**M29 :** Oxidation (M), with neutral losses 0.0000(shown in table), 63.9983

**Ions Score:** 53 **Expect:** 0.00019

**Matched b ions:** b(6), b(7), b(8), b(10), b(11), b(12), b(13)++, b(14), b(17), b(18)++, b(19), b(21)++, b(23)-98++, b(24)++, b(24)-98++, b(25)++, b(26)++, b(28)++, b(30)-98++

**Matched y ions:** y(6), y(7), y(8), y(9), y(10)++, y(10), y(12), y(13), y(14)++, y(15)++, y(16)++, y(17)++, y(18)++, y(19)++, y(21)++, y(22)++, y(22)-98++, y(23)++, y(24)-98++, y(24)++, y(26)++, y(27)++, y(28)++, y(29)-98++, y(30)++

**Precursor origin neutral loss:** +

## Peptide No.261

**GASYSSIPK**

**Confirmed sites:** @S:3

**Ambiguous sites:**

**MS/MS Fragmentation of GASYSSIPK**

Found in **FLNC\_MOUSE**, Filamin-C OS=Mus musculus GN=Flnc PE=1 SV=3

Match to Query 588: 1044.489054 from(523.251803,2+)

Title: Elution from: 31.151 to 31.151 scan no 2464 cid35.00 polarity:+:MA10

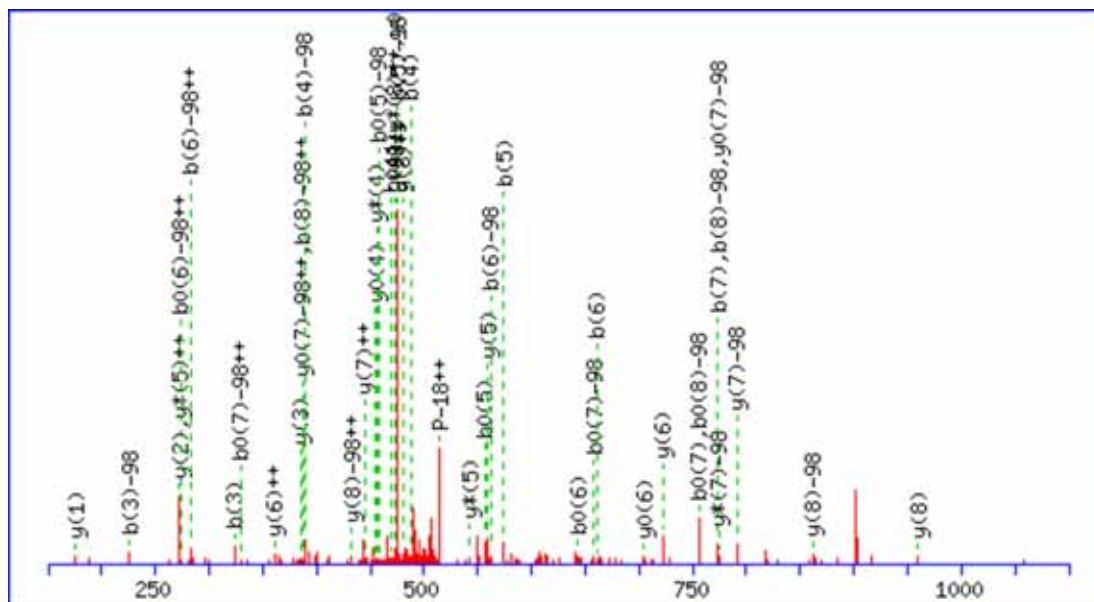

**Monoisotopic mass of neutral peptide Mr(calc):** 1044.4892

**Fixed modifications:** Carbamidomethyl (C) (apply to specified residues or termini only)

**Variable modifications:**

**N-term :** Dimethyl (N-term)

**S3 :** Phospho (ST), with neutral losses 97.9769(shown in table), 0.0000

**K9 :** Dimethyl (K)

**Ions Score:** 29 **Expect:** 0.034

**Matched b ions:** b(3), b(3)-98, b(4)-98, b(4), b(5)-98, b(5), b(6)-98++, b(6)-98, b(6), b(7), b(8)-98, b(8)-98++

**Matched y ions:** y(1), y(2), y(3), y(4), y(5), y(6), y(6)++, y(7)-98, y(7)++, y(8)-98, y(8), y(8)-98++, y(8)++

**Precursor origin neutral loss:** +

## Peptide No.262

**GATPAEDDEDKDIDLFGSDEEEEDK**

**Confirmed sites:** @S:18

**Ambiguous sites:**

MS/MS Fragmentation of **GATPAEDDEDKDIDLFGSDEEEEDK**

Found in **EF1D\_MOUSE**, Elongation factor 1-delta OS=Mus musculus GN=Eef1d PE=1 SV=3

Match to Query 8493: 2932.192737 from(978.404855,3+)

Title: Elution from: 49.569 to 49.569 scan no 4865 cid35.00 polarity:+:MA10:m1s

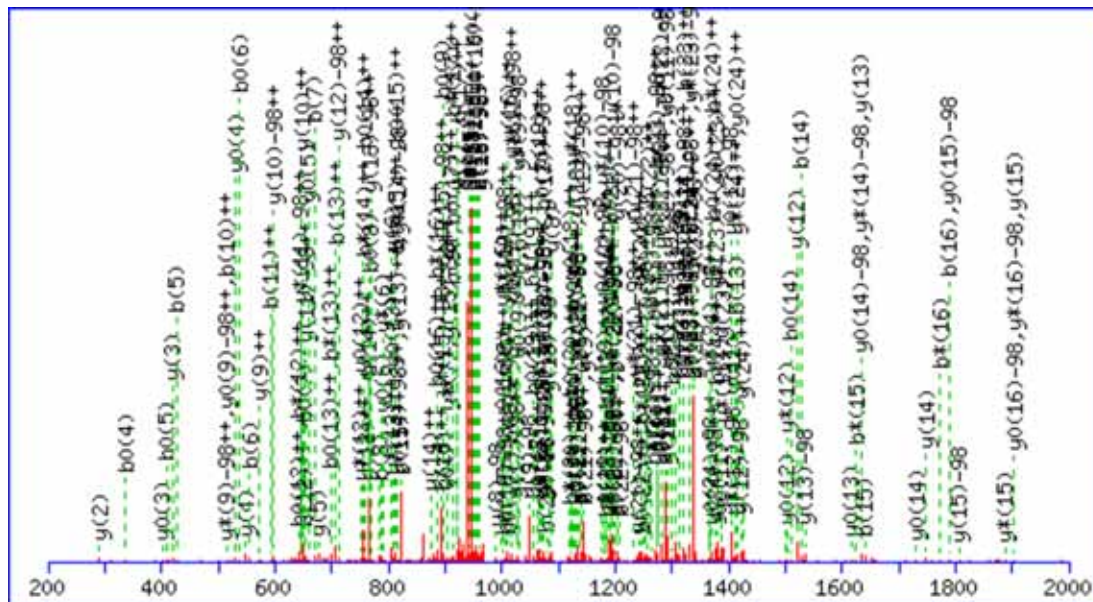

**Monoisotopic mass of neutral peptide Mr(calc):** 2932.1910

**Fixed modifications:** Carbamidomethyl (C) (apply to specified residues or termini only)

**Variable modifications:**

**N-term :** Dimethyl (N-term)

**K11 :** Dimethyl (K)

**S18 :** Phospho (ST), with neutral losses 0.0000(shown in table), 97.9769

**K25 :** Dimethyl (K)

**Ions Score:** 80 **Expect:** 5.6e-007

**Matched b ions:** b(5), b(6), b(7), b(8), b(9), b(10)++, b(10), b(11)++, b(11), b(12)++, b(12), b(13)++, b(13), b(14)++, b(14), b(15)++, b(15), b(16)++, b(16), b(17)++, b(18)-98++, b(18)++, b(19)++, b(19)-98++, b(20)++, b(20)-98++, b(21)-98++, b(21)++, b(22)-98++, b(22)++, b(23)++, b(23)-98++, b(24)++, b(24)-98++

**Matched y ions:** y(2), y(3), y(4), y(5), y(6), y(7), y(8), y(8)-98, y(9)-98, y(9), y(9)++, y(10), y(10)-98, y(10)-98++, y(10)++, y(11), y(11)-98, y(11)-98++, y(12), y(12)-98, y(12)-98++, y(12)++, y(13), y(13)-98, y(13)-98++, y(13)++, y(14), y(14)++, y(15)-98, y(15), y(15)++, y(15)-98++, y(16)++, y(16)-98++, y(17)++, y(17)-98++, y(18)++, y(18)-98++, y(19)++, y(19)-98++, y(20)-98++, y(20)++, y(21)++, y(21)-98++, y(22)-98++, y(22)++, y(23)-98++, y(23)++, y(24)++, y(24)-98++

**Precursor origin neutral loss:** +

## Peptide No.263

**GATPAEDDEDKDIDLFGSDEEEEEDK**

**Confirmed sites:** @S:18

**Ambiguous sites:**

**MS/MS Fragmentation of GATPAEDDEDKDIDLFGSDEEEEEDK**

Found in **EF1D\_MOUSE**, Elongation factor 1-delta OS=Mus musculus GN=Eef1d PE=1 SV=3

Match to Query 7147: 2950.288527 from(984.436785,3+)

Title: Elution from: 49.465 to 49.465 scan no 4613 cid35.00 polarity:+:MA10:m1s



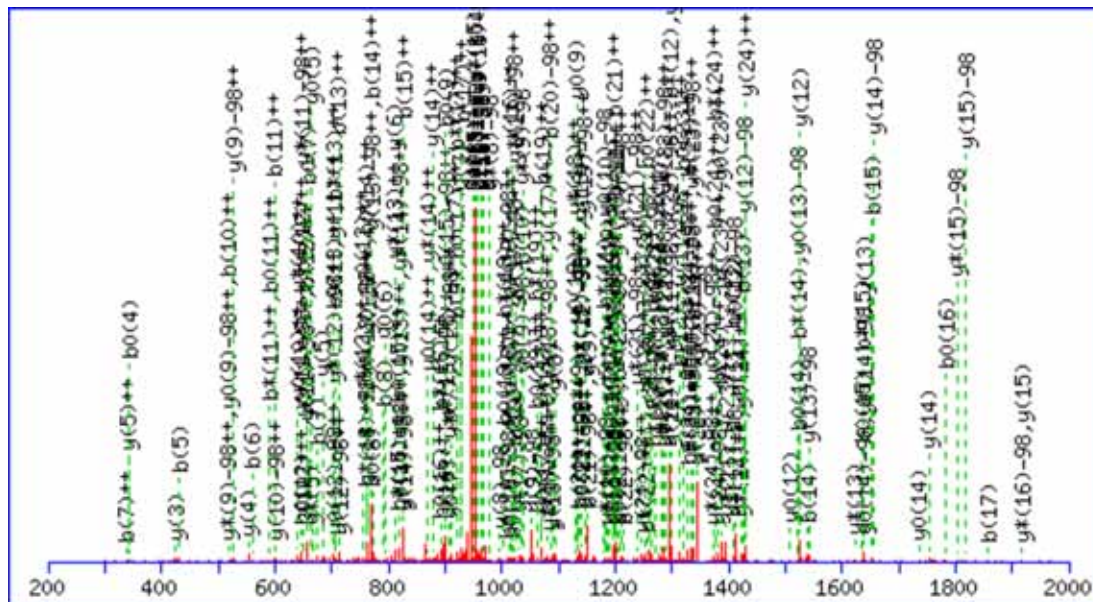

**Monoisotopic mass of neutral peptide Mr(calc):** 2950.2865

**Fixed modifications:** Carbamidomethyl (C) (apply to specified residues or termini only)

**Variable modifications:**

**N-term :** Dimethyl:2H(4)13C(2) (N-term)

**K11 :** Dimethyl:2H(4)13C(2) (K)

**S18 :** Phospho (ST), with neutral losses 97.9769(shown in table), 0.0000

**K25 :** Dimethyl:2H(4)13C(2) (K)

**Ions Score:** 68 **Expect:** 1.4e-005

**Matched b ions:** b(5), b(6), b(7)++, b(7), b(8), b(9), b(10)++, b(10), b(11)++, b(11), b(12)++, b(12), b(13)++, b(13), b(14)++, b(14), b(15)++, b(15), b(16)++, b(17)++, b(17), b(18)-98++, b(18)++, b(19)++, b(19)-98++, b(20)++, b(20)-98++, b(21)-98++, b(21)++, b(22)++, b(22)-98++, b(23)++, b(23)-98++, b(24)++, b(24)-98++

**Matched y ions:** y(3), y(4), y(5)++, y(5), y(6), y(7), y(8), y(8)-98, y(9)-98, y(9), y(9)-98++, y(10)-98, y(10), y(10)-98++, y(10)++, y(11)-98++, y(11), y(11)-98, y(11)++, y(12), y(12)-98, y(12)-98++, y(12)++, y(13)-98++, y(13), y(13)-98, y(13)++, y(14), y(14)-98++, y(14)-98, y(14)++, y(15)-98, y(15), y(15)++, y(15)-98++, y(16)-98++, y(16)++, y(17)++, y(17)-98++, y(18)++, y(18)-98++, y(19)++, y(19)-98++, y(20)++, y(20)-98++, y(21)++, y(21)-98++, y(22)-98++, y(22)++, y(23)++, y(23)-98++, y(24)++, y(24)-98++

**Precursor origin neutral loss:** +

## Peptide No.264

**GATPAEDEDKIDLFGSDEEEEDKEAAR**

**Confirmed sites:** @S:18

**Ambiguous sites:**

MS/MS Fragmentation of **GATPAEDEDKIDLFGSDEEEEDKEAAR**

Found in **EF1D\_MOUSE**, Elongation factor 1-delta OS=Mus musculus GN=Eef1d PE=1 SV=3

Match to Query 6771: 3359.410785 from(1120.810871,3+)

Title: Elution from: 46.580 to 46.580 scan no 4181 cid35.00 polarity:+:MA10:m1s

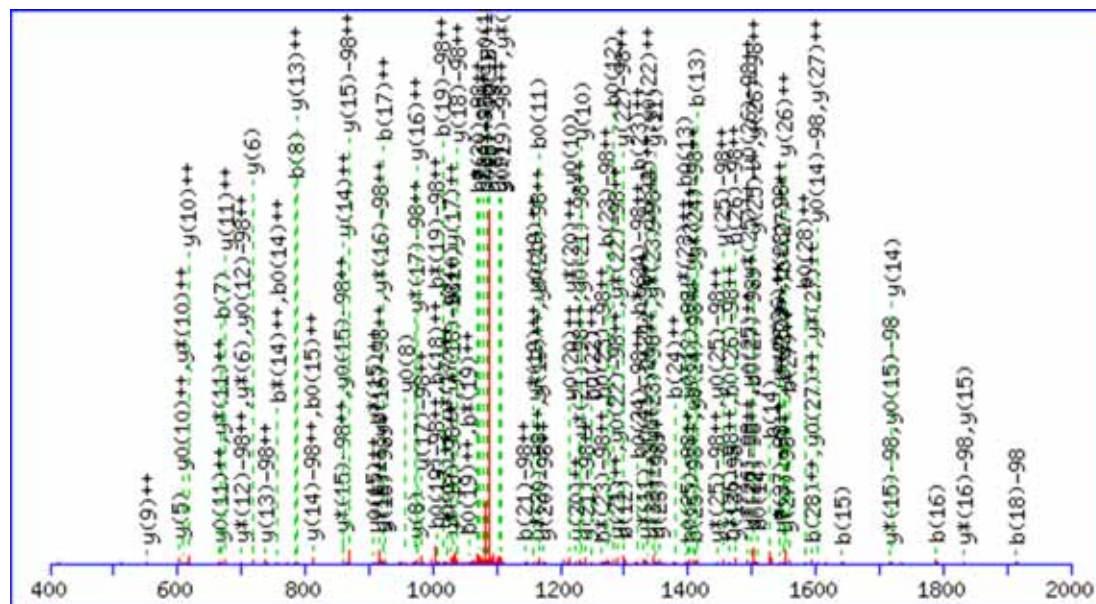

**Monoisotopic mass of neutral peptide Mr(calc):** 3359.4089

**Fixed modifications:** Carbamidomethyl (C) (apply to specified residues or termini only)

**Variable modifications:**

**N-term :** Dimethyl (N-term)

**K11 :** Dimethyl (K)

**S18 :** Phospho (ST), with neutral losses 97.9769(shown in table), 0.0000

**K25 :** Dimethyl (K)

**Ions Score:** 88 **Expect:** 1.3e-007

**Matched b ions:** b(7), b(8), b(10), b(12), b(13), b(14), b(15), b(16), b(17)++, b(18)-98, b(18)++, b(19)-98++, b(20)-98++, b(21)-98++, b(23)-98++, b(23)++, b(24)-98++, b(24)++, b(25)-98++, b(26)-98++, b(27)++, b(28)++, b(28)-98++

**Matched y ions:** y(5), y(6), y(8), y(9)++, y(9), y(10)++, y(10), y(11)++, y(11), y(13)-98++, y(13)-98, y(13)++, y(14)-98++, y(14)++, y(14), y(15)-98++, y(15), y(15)++, y(16)-98++, y(16)++, y(17)-98++, y(17)++, y(18)++, y(18)-98++, y(19)++, y(20)-98++, y(20)++, y(21)-98++, y(21)++, y(22)-98++, y(22)++, y(23)-98++, y(23)++, y(25)++, y(25)-98++, y(26)-98++, y(26)++, y(27)-98++, y(27)++

**Precursor origin neutral loss:** +

## Peptide No.265

**GATPAEDEDKDIDLFGSDEEEEDKEAAR**

**Confirmed sites:** @S:18

**Ambiguous sites:**

MS/MS Fragmentation of **GATPAEDEDKDIDLFGSDEEEEDKEAAR**

Found in **EF1D\_MOUSE**, Elongation factor 1-delta OS=Mus musculus GN=Eef1d PE=1 SV=3

Match to Query 7544: 3377.510436 from(1126.844088,3+)

Title: Elution from: 46.713 to 46.713 scan no 4310 cid35.00 polarity:+:MA10:m1s

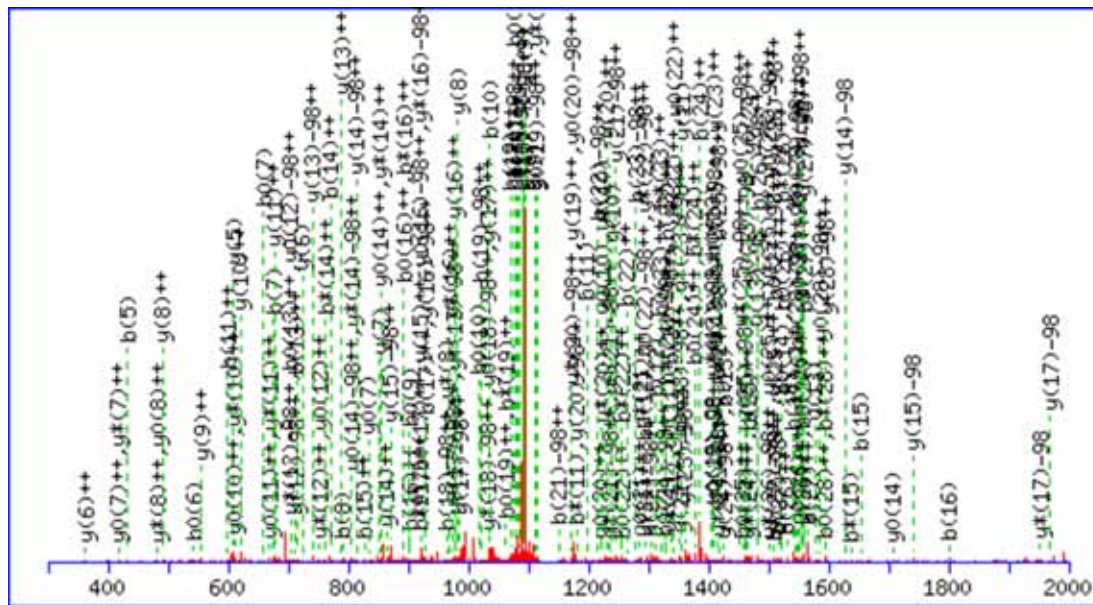

**Monoisotopic mass of neutral peptide Mr(calc): 3377.5044**

**Fixed modifications:** Carbamidomethyl (C) (apply to specified residues or termini only)

**Variable modifications:**

**N-term :** Dimethyl:2H(4)13C(2) (N-term)

**K11 :** Dimethyl:2H(4)13C(2) (K)

**S18 :** Phospho (ST), with neutral losses 97.9769(shown in table), 0.0000

**K25 :** Dimethyl:2H(4)13C(2) (K)

**Ions Score: 35 Expect: 0.038**

**Matched b ions:** b(5), b(7), b(8), b(9), b(10), b(11)++, b(11), b(12), b(13), b(13)++, b(14), b(14)++, b(15), b(15)++, b(16), b(16)++, b(17)++, b(18)-98++, b(19)-98++, b(19)++, b(20)-98++, b(21)-98++, b(22)-98++, b(22)++, b(23)-98++, b(23)++, b(24)++, b(24)-98++, b(25)++, b(25)-98++, b(26)-98++, b(26)++, b(27)++, b(27)-98++, b(28)-98++

**Matched y ions:** y(5), y(6)++, y(6), y(7), y(8)++, y(8), y(9)++, y(9), y(10)++, y(10), y(11)++, y(11), y(12)-98++, y(13)-98++, y(13)-98, y(13)++, y(13), y(14)-98, y(14)-98++, y(14)++, y(15)-98++, y(15)-98, y(15)++, y(16)-98++, y(16)++, y(17)-98, y(17)++, y(17)-98++, y(18)++, y(19)++, y(20)++, y(20)-98++, y(21)-98++, y(21)++, y(22)-98++, y(22)++, y(23)-98++, y(23)++, y(24)-98++, y(25)-98++, y(25)++, y(26)++, y(26)-98++, y(27)-98++, y(28)-98++

**Precursor origin neutral loss: +**

## Peptide No.266

**GDQVLNFSDAEDLIDDSK**

**Confirmed sites: @S:17**

**Ambiguous sites:**

**MS/MS Fragmentation of GDQVLNFSDAEDLIDDSK**

Found in **MCRS1\_MOUSE**, Microspherule protein 1 OS=Mus musculus GN=Mcrs1 PE=1 SV=1

Match to Query 4814: 2059.863672 from(515.973194,+)

Title: Elution from: 33.726 to 33.726 scan no 2604 cid35.00 polarity:+:MA10:m1s



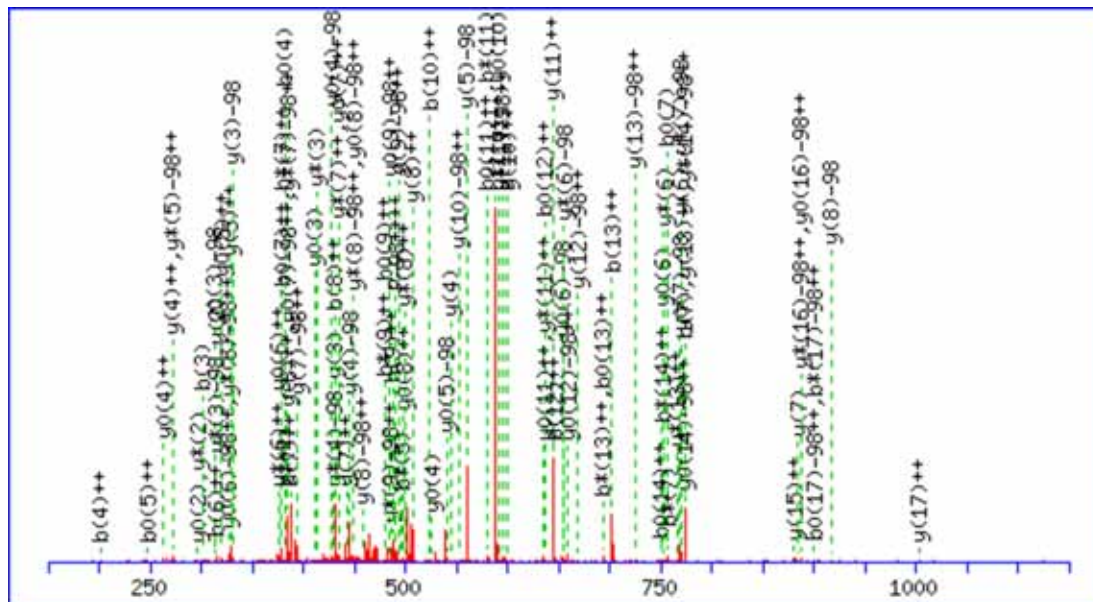

**Monoisotopic mass of neutral peptide Mr(calc):** 2059.8623

**Fixed modifications:** Carbamidomethyl (C) (apply to specified residues or termini only)

**Variable modifications:**

**S17 :** Phospho (ST), with neutral losses 0.0000(shown in table), 97.9769

**Ions Score:** 43 **Expect:** 0.0021

**Matched b ions:** b(3), b(4)++, b(6)++, b(7)++, b(7), b(8)++, b(9)++, b(10)++, b(11)++, b(12)++, b(13)++

**Matched y ions:** y(2), y(3)-98, y(3), y(4)++, y(4)-98, y(4), y(5)-98, y(5)++, y(6)++, y(6), y(7), y(7)-98++, y(7)++, y(8)++, y(8)-98, y(8)-98++, y(9)-98++, y(10)-98++, y(10)++, y(11)++, y(11)-98++, y(12)-98++, y(13)++, y(13)-98++, y(15)++, y(17)++

**Precursor origin neutral loss:**

## Peptide No.267

**GDQVSQNGLPAEQGS**PR

**Confirmed sites:** @S:15

**Ambiguous sites:**

MS/MS Fragmentation of **GDQVSQNGLPAEQGS**PR

Found in **SPTB2\_MOUSE**, Spectrin beta chain, brain 1 OS=Mus musculus GN=Sptbn1 PE=1 SV=2

Match to Query 4656: 1846.819956 from(924.417254,2+)

Title: Elution from: 30.687 to 30.687 scan no 2399 cid35.00 polarity:+:MA10:m1s





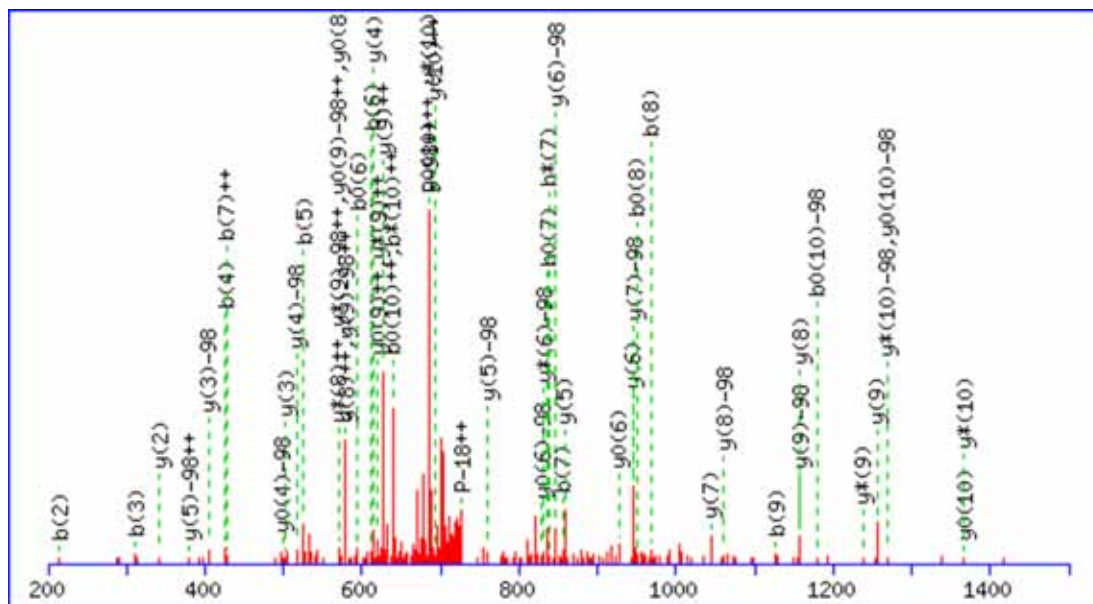

**Monoisotopic mass of neutral peptide Mr(calc):** 1468.5459

**Fixed modifications:** Carbamidomethyl (C) (apply to specified residues or termini only)

**Variable modifications:**

**N-term :** Dimethyl (N-term)

**Y7 :** Phospho (Y)

**S10 :** Phospho (ST), with neutral losses 0.0000(shown in table), 97.9769

**Ions Score:** 25 **Expect:** 0.028

**Matched b ions:** b(2), b(3), b(4), b(5), b(6), b(7)++, b(7), b(8), b(9)

**Matched y ions:** y(2), y(3)-98, y(3), y(4)-98, y(4), y(5), y(5)-98++, y(5)-98, y(6), y(6)-98, y(7), y(7)-98, y(8)++, y(8), y(8)-98, y(9)-98++, y(9)-98, y(9), y(9)++, y(10)++

**Precursor origin neutral loss:** +

## Peptide No.269

**GEPNVSYICSR**

**Confirmed sites:** @Y:7

**Ambiguous sites:**

MS/MS Fragmentation of **GEPNVSYICSR**

Found in **GSK3A\_MOUSE**, Glycogen synthase kinase-3 alpha OS=Mus musculus GN=Gsk3a PE=1 SV=2

Match to Query 1547: 1388.580054 from(695.297303,2+)

Title: Elution from: 35.762 to 35.762 scan no 2876 cid35.00 polarity:+:MA10

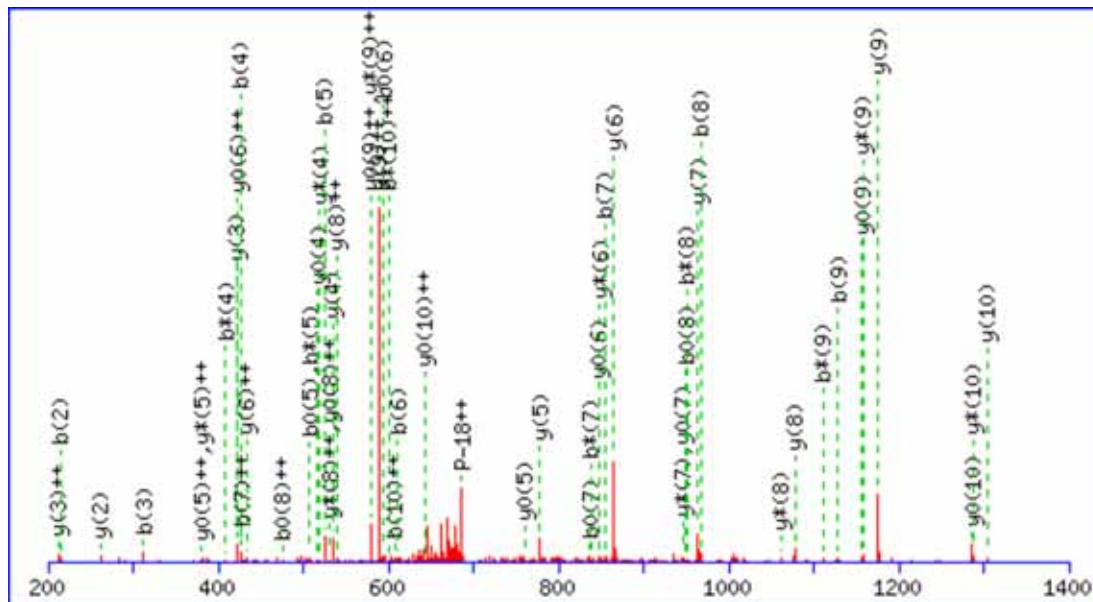

**Monoisotopic mass of neutral peptide Mr(calc):** 1388.5795

**Fixed modifications:** Carbamidomethyl (C) (apply to specified residues or termini only)

**Variable modifications:**

**N-term :** Dimethyl (N-term)

**Y7 :** Phospho (Y)

**Ions Score:** 54 **Expect:** 6.3e-005

**Matched b ions:** b(2), b(3), b(4), b(5), b(6), b(7), b(7)++, b(8), b(9), b(10)++

**Matched y ions:** y(2), y(3), y(3)++, y(4), y(5), y(6), y(6)++, y(7), y(8), y(8)++, y(9)++, y(9), y(10)

**Precursor origin neutral loss:** +

## Peptide No.270

**GEPNVSYICSR**

**Confirmed sites:** @Y:7

**Ambiguous sites:**

**MS/MS Fragmentation of** **GEPNVSYICSR**

Found in **GSK3A\_MOUSE**, Glycogen synthase kinase-3 alpha OS=Mus musculus GN=Gsk3a PE=1 SV=2

Match to Query 1321: 1394.612264 from(698.313408,2+)

Title: Elution from: 35.458 to 35.458 scan no 2737 cid35.00 polarity:+:MA10

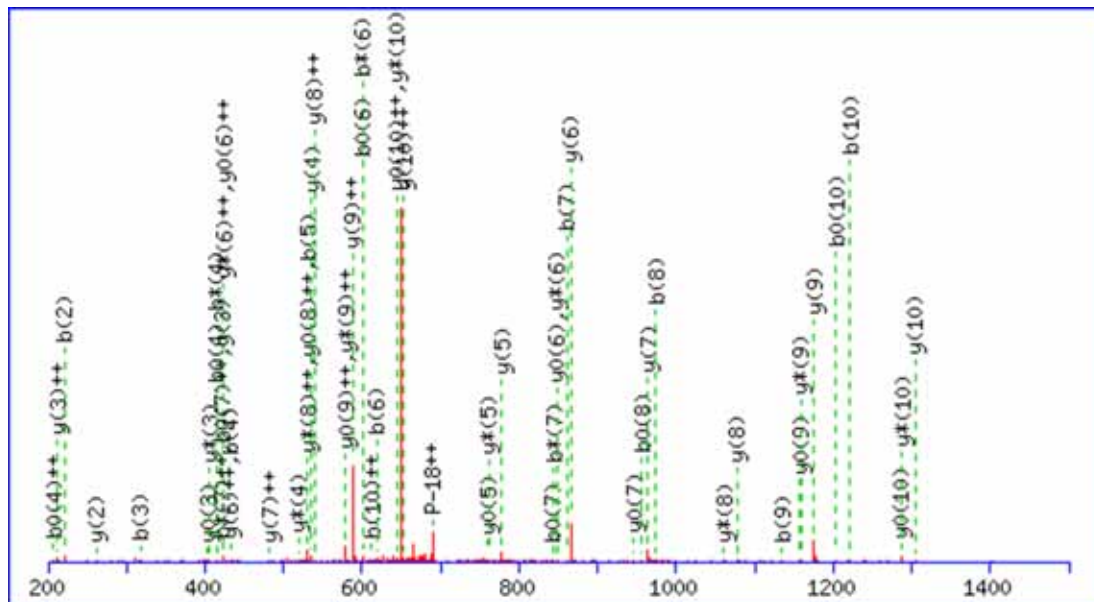

**Monoisotopic mass of neutral peptide Mr(calc):** 1394.6114

**Fixed modifications:** Carbamidomethyl (C) (apply to specified residues or termini only)

**Variable modifications:**

**N-term :** Dimethyl:2H(4)13C(2) (N-term)

**Y7 :** Phospho (Y)

**Ions Score:** 57 **Expect:** 4.1e-005

**Matched b ions:** b(2), b(3), b(4), b(5), b(6), b(7), b(8), b(9), b(10), b(10)++

**Matched y ions:** y(2), y(3), y(3)++, y(4), y(5), y(6), y(6)++, y(7), y(7)++, y(8), y(8)++, y(9)++, y(9), y(10), y(10)++

**Precursor origin neutral loss:** +

## Peptide No.271

**GGDDLDPNYVLSSR**

**Confirmed sites:** @S:12

**Ambiguous sites:**

**MS/MS Fragmentation of GGDDLDPNYVLSSR**

Found in **KCRM\_MOUSE**, Creatine kinase M-type OS=Mus musculus GN=Ckm PE=1 SV=1

Match to Query 2762: 1614.693672 from(808.354112,2+)

Title: Elution from: 46.674 to 46.674 scan no 4353 cid35.00 polarity:+:MA10



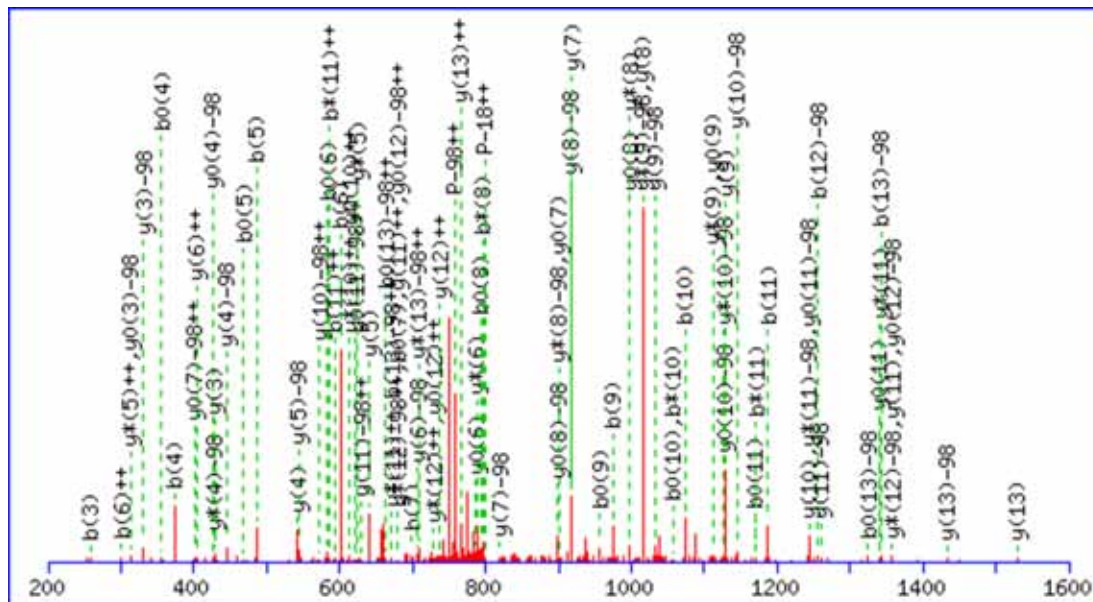

**Monoisotopic mass of neutral peptide Mr(calc):** 1614.6927

**Fixed modifications:** Carbamidomethyl (C) (apply to specified residues or termini only)

**Variable modifications:**

**N-term :** Dimethyl (N-term)

**S12 :** Phospho (ST), with neutral losses 97.9769(shown in table), 0.0000

**Ions Score:** 66 **Expect:** 7.5e-006

**Matched b ions:** b(3), b(4), b(5), b(6), b(6)++, b(7), b(9), b(10), b(11), b(11)++, b(12)-98, b(13)-98, b(13)-98++

**Matched y ions:** y(3)-98, y(3), y(4)-98, y(4), y(5), y(5)-98, y(6)++, y(6)-98, y(7), y(7)-98, y(8)-98, y(8), y(9), y(9)-98, y(10), y(10)-98, y(10)-98++, y(11), y(11)-98, y(11)-98++, y(11)++, y(12)++, y(13), y(13)-98, y(13)++

**Precursor origin neutral loss:** +

## Peptide No.272

**GGDDLDPNYVLSSR**

**Confirmed sites:** @S:13

**Ambiguous sites:**

**MS/MS Fragmentation of GGDDLDPNYVLSSR**

Found in **KCRM\_MOUSE**, Creatine kinase M-type OS=Mus musculus GN=Ckm PE=1 SV=1

Match to Query 2688: 1614.694522 from(808.354537,2+)

Title: Elution from: 46.513 to 46.513 scan no 4311 cid35.00 polarity:+:MA10

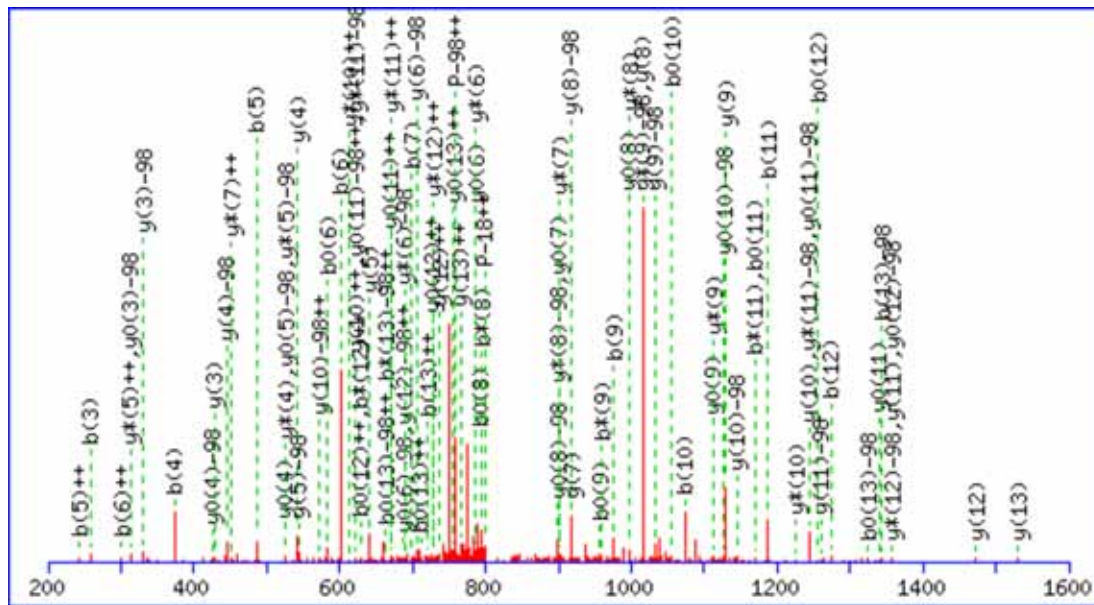

**Monoisotopic mass of neutral peptide Mr(calc):** 1614.6927

**Fixed modifications:** Carbamidomethyl (C) (apply to specified residues or termini only)

**Variable modifications:**

**N-term :** Dimethyl (N-term)

**S13 :** Phospho (ST), with neutral losses 97.9769(shown in table), 0.0000

**Ions Score:** 78 **Expect:** 4.4e-007

**Matched b ions:** b(3), b(4), b(5), b(5)++, b(6), b(6)++, b(7), b(9), b(10), b(11), b(12), b(13)-98, b(13)++

**Matched y ions:** y(3)-98, y(3), y(4), y(4)-98, y(5), y(5)-98, y(6)-98, y(7), y(8)-98, y(8), y(9), y(9)-98, y(10), y(10)-98, y(10)-98++, y(10)++, y(11), y(11)-98, y(12), y(12)++, y(12)-98++, y(13), y(13)++

**Precursor origin neutral loss:** +

## Peptide No.273

**GGDDLDPNYVLSSR**

**Confirmed sites:** @Y:9

**Ambiguous sites:**

**MS/MS Fragmentation of GGDDLDPNYVLSSR**

Found in **KCRM\_MOUSE**, Creatine kinase M-type OS=Mus musculus GN=Ckm PE=1 SV=1

Match to Query 2687: 1614.691986 from(808.353269,2+)

Title: Elution from: 49.727 to 49.727 scan no 4695 cid35.00 polarity:+:MA10

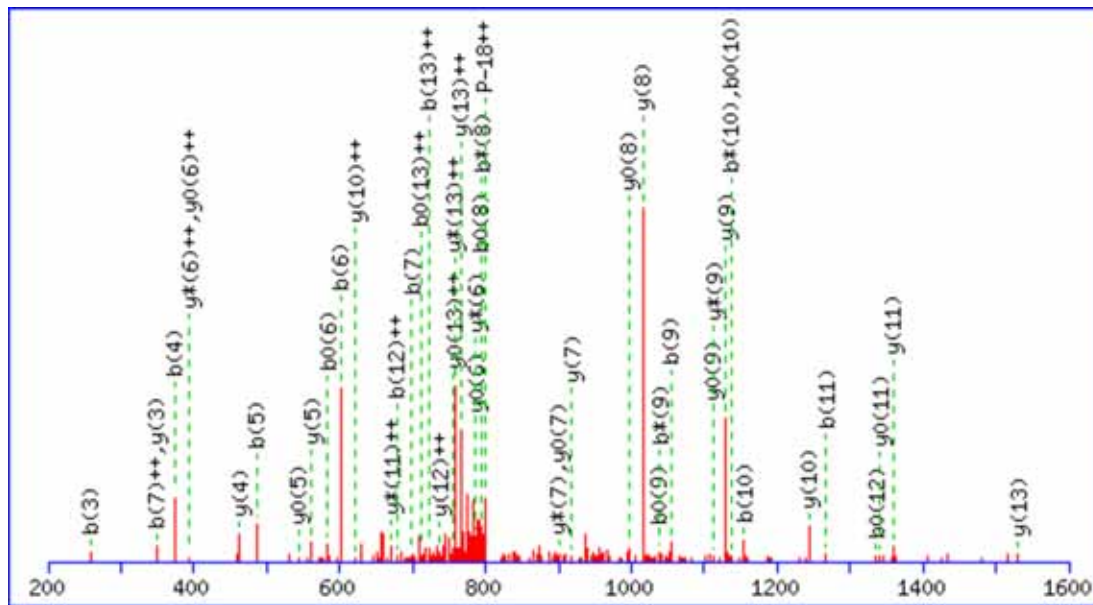

**Monoisotopic mass of neutral peptide Mr(calc):** 1614.6927

**Fixed modifications:** Carbamidomethyl (C) (apply to specified residues or termini only)

**Variable modifications:**

**N-term :** Dimethyl (N-term)

**Y9 :** Phospho (Y)

**Ions Score:** 51 **Expect:** 0.00023

**Matched b ions:** b(3), b(4), b(5), b(6), b(7)++, b(7), b(9), b(10), b(11), b(12)++, b(13)++

**Matched y ions:** y(3), y(4), y(5), y(7), y(8), y(9), y(10), y(10)++, y(11), y(12)++, y(13)++, y(13)

**Precursor origin neutral loss:** +

## Peptide No.274

**GGDDLDPNYVLSSR**

**Confirmed sites:** @S:13

**Ambiguous sites:**

MS/MS Fragmentation of **GGDDLDPNYVLSSR**

Found in **KCRM\_MOUSE**, Creatine kinase M-type OS=Mus musculus GN=Ckm PE=1 SV=1

Match to Query 2717: 1620.726136 from(811.370344,2+)

Title: Elution from: 46.551 to 46.551 scan no 4316 cid35.00 polarity:+:MA10:m1s





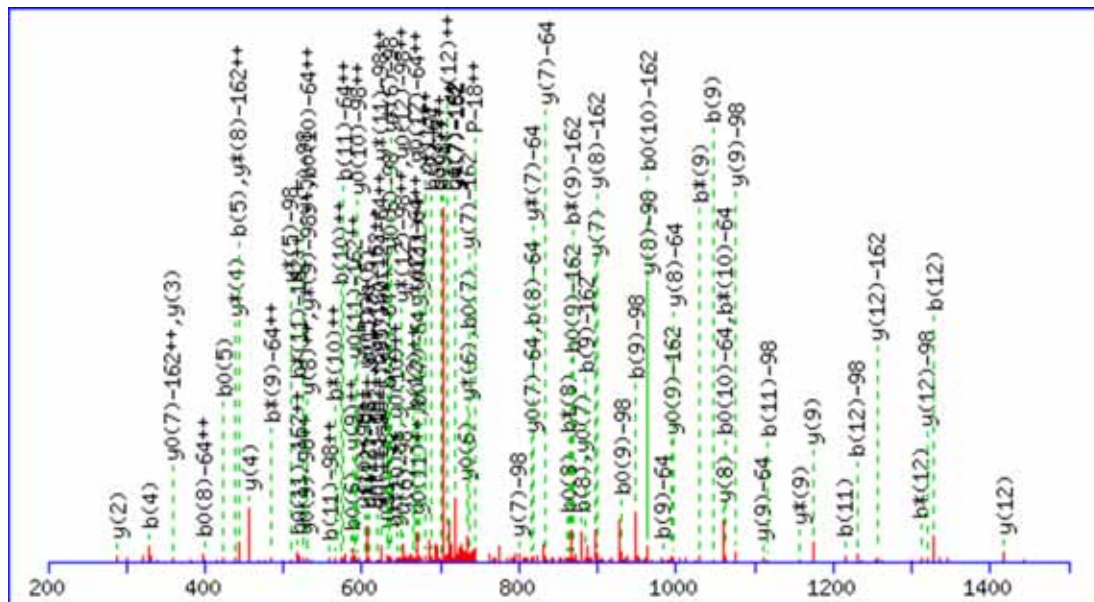

**Monoisotopic mass of neutral peptide Mr(calc):** 1501.6636

**Fixed modifications:** Carbamidomethyl (C) (apply to specified residues or termini only)

**Variable modifications:**

**N-term :** Dimethyl (N-term)

**M7 :** Oxidation (M), with neutral losses 0.0000(shown in table), 63.9983

**S9 :** Phospho (ST), with neutral losses 0.0000(shown in table), 97.9769

**Ions Score:** 30 **Expect:** 0.031

**Matched b ions:** b(4), b(5), b(6), b(8), b(9)-98, b(9), b(10)++, b(11), b(11)-98, b(11)-98++, b(11)++, b(12)-98, b(12), b(12)++

**Matched y ions:** y(2), y(3), y(4), y(5)-98, y(5), y(6)-98, y(7), y(7)-98, y(8), y(8)-98, y(8)++, y(9), y(9)-98, y(9)++, y(10)-98++, y(11)-98++, y(11)++, y(12), y(12)-98, y(12)++

**Precursor origin neutral loss:** +

## Peptide No.276

**GGISEASGEESVPLGDR**

**Confirmed sites:** @S:3

**Ambiguous sites:**

MS/MS Fragmentation of **GGISEASGEESVPLGDR**

Found in **JSPR1\_MOUSE**, Junctional sarcoplasmic reticulum protein 1 OS=Mus musculus GN=Jspr1 PE=1 SV=2

Match to Query 4015: 1853.805080 from(927.909816,2+)

Title: Elution from: 39.340 to 39.340 scan no 3387 cid35.00 polarity:+:MA10

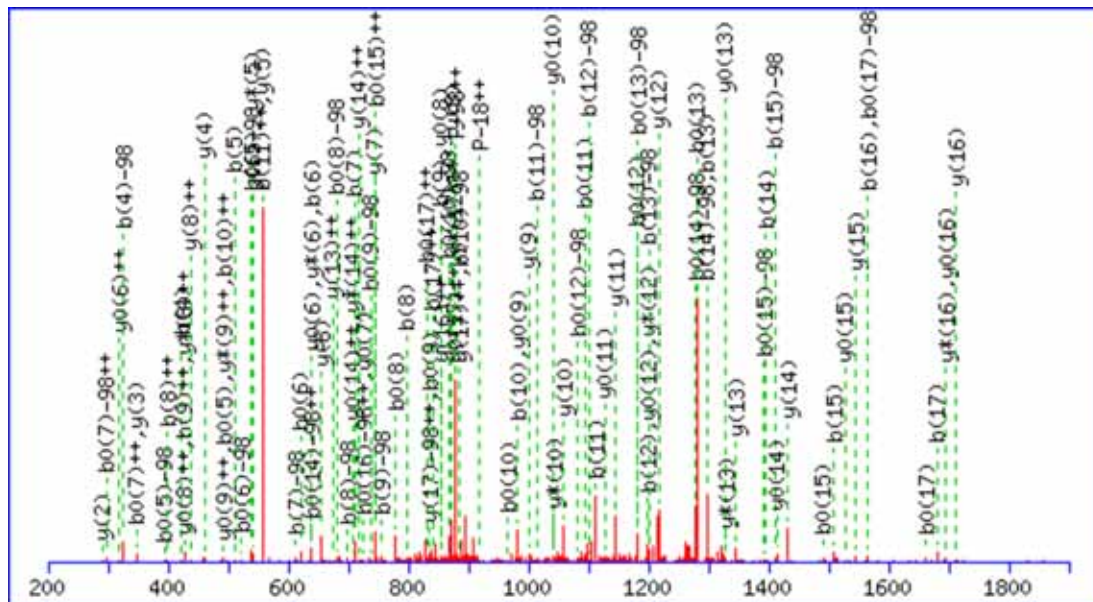

**Monoisotopic mass of neutral peptide Mr(calc):** 1853.8044

**Fixed modifications:** Carbamidomethyl (C) (apply to specified residues or termini only)

**Variable modifications:**

**N-term :** Dimethyl (N-term)

**S3 :** Phospho (ST), with neutral losses 0.0000(shown in table), 97.9769

**Ions Score:** 97 **Expect:** 8e-009

**Matched b ions:** b(4)-98, b(4), b(5), b(6), b(6)-98, b(7), b(7)-98, b(8)-98, b(8)++, b(8), b(9)++, b(9)-98, b(9), b(10), b(10)++, b(10)-98, b(11)++, b(11), b(11)-98, b(12), b(12)-98, b(13), b(13)-98, b(14)-98, b(14), b(15), b(15)-98, b(16), b(17), b(17)++

**Matched y ions:** y(2), y(3), y(4), y(5), y(6), y(7), y(8), y(8)++, y(9), y(10), y(11), y(12), y(13), y(13)++, y(14), y(14)++, y(15), y(16), y(16)++, y(17)-98++, y(17)++

**Precursor origin neutral loss:** +

## Peptide No.277

**GGISEASGEESVPLGDR**

**Confirmed sites:** @S:3,@S:5,@S:8

**Ambiguous sites:**

**MS/MS Fragmentation of GGISSEASGEESVPLGDR**

Found in **JSPR1\_MOUSE**, Junctional sarcoplasmic reticulum protein 1 OS=Mus musculus GN=Jspr1 PE=1 SV=2

**Match to Query 5061:** 2013.738608 from(1007.876580,2+)

**Title:** Elution from: 44.847 to 44.847 scan no 4080 cid35.00 polarity:+:MA10:m1s







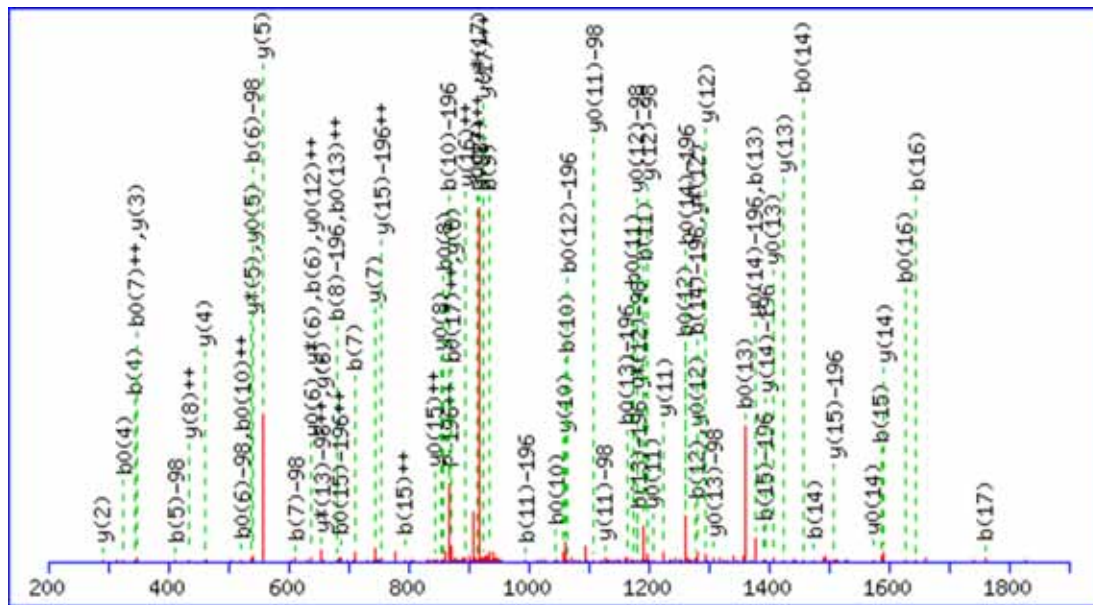

**Monoisotopic mass of neutral peptide Mr(calc):** 1933.7707

**Fixed modifications:** Carbamidomethyl (C) (apply to specified residues or termini only)

**Variable modifications:**

**N-term :** Dimethyl (N-term)

**S5 :** Phospho (ST), with neutral losses 0.0000(shown in table), 97.9769

**S8 :** Phospho (ST), with neutral losses 0.0000(shown in table), 97.9769

**Ions Score:** 62 **Expect:** 1.7e-005

**Matched b ions:** b(4), b(5)-98, b(6)-98, b(6), b(7)-98, b(7), b(8)-98, b(8)-196, b(9), b(9)-98, b(10), b(10)-196, b(11)-98, b(11), b(11)-196, b(12), b(12)-98, b(13), b(13)-98, b(13)-196, b(14)-98, b(14)-196, b(14), b(15)-98, b(15), b(15)++, b(15)-196, b(16), b(17), b(17)-98, b(17)-98++

**Matched y ions:** y(2), y(3), y(4), y(5), y(6), y(7), y(8), y(8)++, y(10), y(11)-98, y(11), y(12), y(12)-98, y(13), y(14), y(14)-98, y(14)-196, y(14)-98, y(14)-196, y(15)-196, y(15)-98, y(15)-196, y(15)-98, y(16)-98, y(16)++, y(17)++

**Precursor origin neutral loss:** +

## Peptide No.280

**GGISEASGEESVPLGDR**

**Confirmed sites: @S:8**

**Ambiguous sites:**

MS/MS Fragmentation of **GGISEASGEESVPLGDR**

Found in **JSPR1\_MOUSE**, Junctional sarcoplasmic reticulum protein 1 OS=Mus musculus GN=Jsrp1 PE=1 SV=2

Match to Query 4707: 1853.805322 from(927.909937,2+)

Title: Elution from: 38.671 to 38.671 scan no 3488 cid35.00 polarity:+:MA10

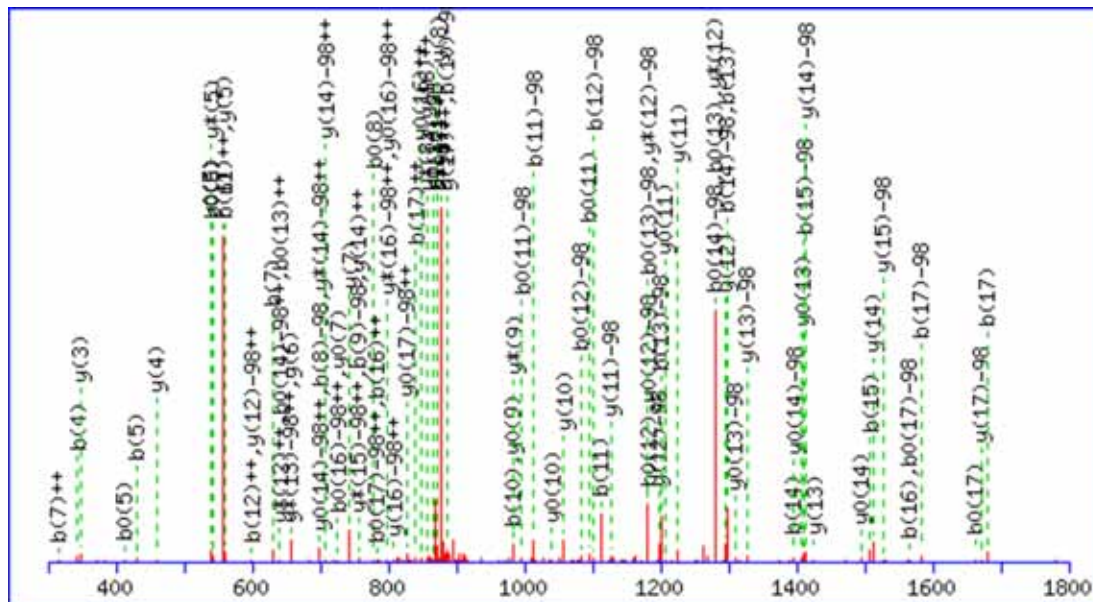

**Monoisotopic mass of neutral peptide Mr(calc):** 1853.8044

**Fixed modifications:** Carbamidomethyl (C) (apply to specified residues or termini only)

**Variable modifications:**

**N-term :** Dimethyl (N-term)

**S8 :** Phospho (ST), with neutral losses 97.9769(shown in table), 0.0000

**Ions Score:** 99 **Expect:** 5.8e-009

**Matched b ions:** b(4), b(5), b(6), b(7), b(7)++, b(8)-98, b(9)-98, b(10), b(10)-98, b(11)++, b(11)-98, b(11), b(12)-98, b(12)++, b(13)-98, b(13), b(14)-98, b(14), b(15)-98, b(15), b(16), b(16)++, b(17)-98, b(17), b(17)++

**Matched y ions:** y(3), y(4), y(5), y(6), y(7), y(8), y(10), y(11)-98, y(11), y(12), y(12)-98, y(12)-98++, y(13)-98, y(13), y(14)-98, y(14), y(14)++, y(14)-98++, y(15)-98, y(16)-98++, y(16)++, y(17)-98, y(17)++

**Precursor origin neutral loss:** +

## Peptide No.281

**GGISEASGEESVPLGDR**

**Confirmed sites:** @S:3

**Ambiguous sites:**

MS/MS Fragmentation of **GGISEASGEESVPLGDR**

Found in **JSPR1\_MOUSE**, Junctional sarcoplasmic reticulum protein 1 OS=Mus musculus GN=Jspr1 PE=1 SV=2

Match to Query 4184: 1859.836320 from(930.925436,2+)

Title: Elution from: 39.436 to 39.436 scan no 3428 cid35.00 polarity:+:MA10

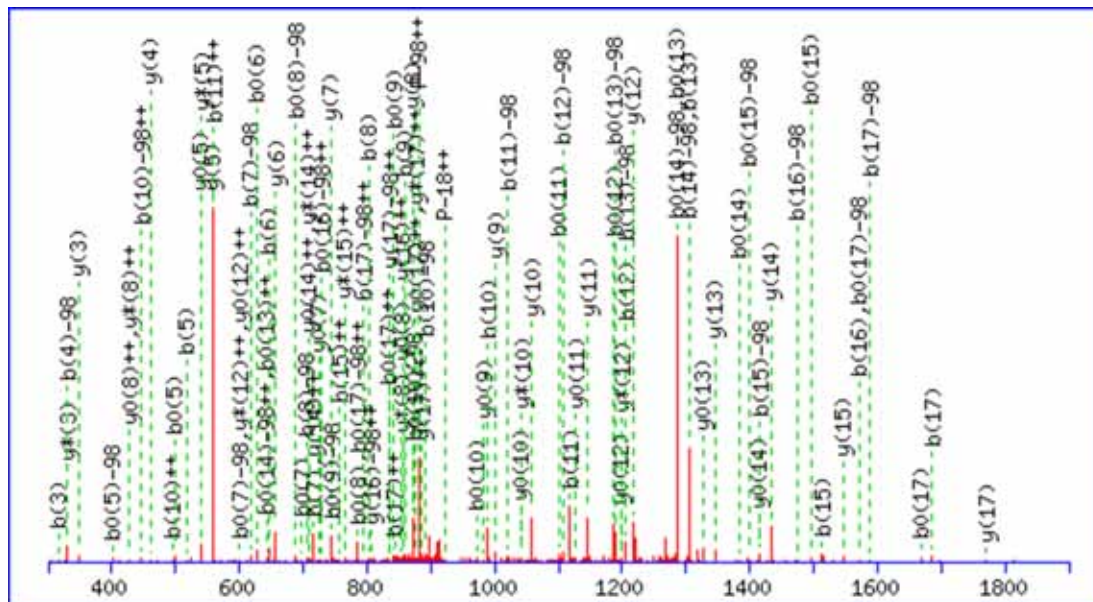

**Monoisotopic mass of neutral peptide Mr(calc):** 1859.8362

**Fixed modifications:** Carbamidomethyl (C) (apply to specified residues or termini only)

**Variable modifications:**

**N-term :** Dimethyl:2H(4)13C(2) (N-term)

**S3 :** Phospho (ST), with neutral losses 0.0000(shown in table), 97.9769

**Ions Score:** 99 **Expect:** 5.9e-009

**Matched b ions:** b(3), b(4)-98, b(5), b(6), b(7), b(7)-98, b(8), b(8)-98, b(9), b(10), b(10)-98++, b(10)++, b(10)-98, b(11), b(11)-98, b(11)++, b(12)-98, b(12), b(13), b(13)-98, b(14)-98, b(15), b(15)-98, b(15)++, b(16), b(16)-98, b(17), b(17)-98, b(17)-98++, b(17)++

**Matched y ions:** y(3), y(4), y(5), y(6), y(7), y(8), y(9), y(10), y(11), y(12), y(13), y(14)++, y(14), y(15), y(16)-98++, y(16)++, y(17), y(17)++, y(17)-98++

**Precursor origin neutral loss:** +

## Peptide No.282

**GGISEASGEESVPLGDR**

**Confirmed sites:** @S:3,@S:5,@S:8

**Ambiguous sites:**

MS/MS Fragmentation of **GGISEASGEESVPLGDR**

Found in **JSPR1\_MOUSE**, Junctional sarcoplasmic reticulum protein 1 OS=Mus musculus GN=Jspr1 PE=1 SV=2

Match to Query 5091: 2019.770088 from(1010.892320,2+)

Title: Elution from: 44.696 to 44.696 scan no 4063 cid35.00 polarity:+:MA10:m1s

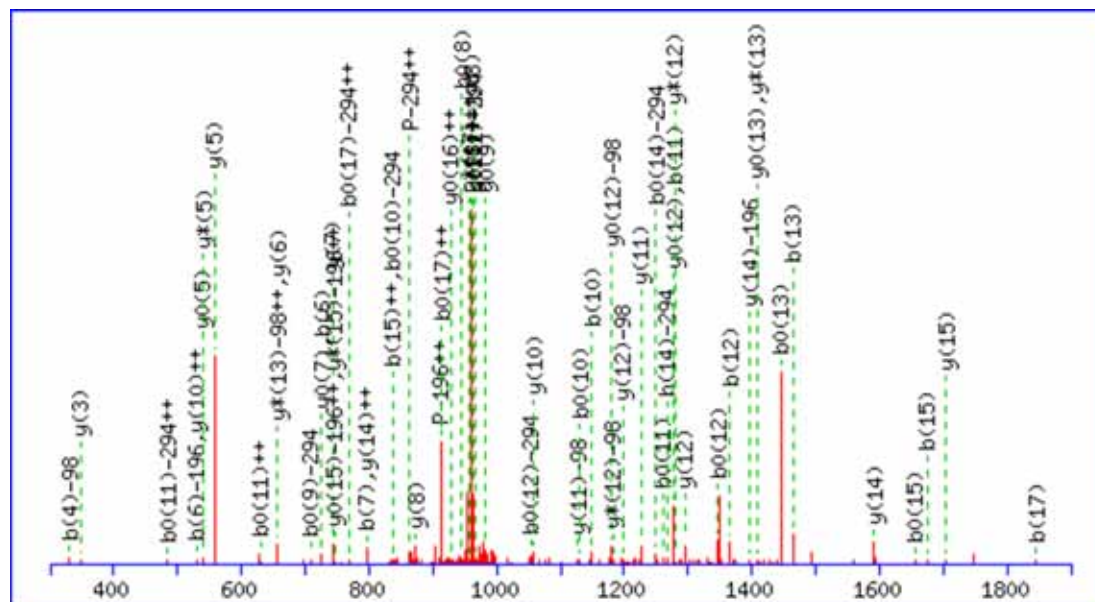

**Monoisotopic mass of neutral peptide Mr(calc):** 2019.7689

**Fixed modifications:** Carbamidomethyl (C) (apply to specified residues or termini only)

**Variable modifications:**

**N-term :** Dimethyl:2H(4)13C(2) (N-term)

**S3 :** Phospho (ST), with neutral losses 0.0000(shown in table), 97.9769

**S5 :** Phospho (ST), with neutral losses 0.0000(shown in table), 97.9769

**S8 :** Phospho (ST), with neutral losses 0.0000(shown in table), 97.9769

**Ions Score:** 56 **Expect:** 4.6e-005

**Matched b ions:** b(4)-98, b(6)-196, b(6), b(6)-98, b(7), b(7)-98, b(8), b(8)-196, b(8)-98, b(9)-98, b(10)-196, b(10)-98, b(10), b(11)-98, b(11), b(11)-196, b(12), b(12)-98, b(13), b(13)-98, b(14)-98, b(14)-196, b(14)-294, b(15), b(15)++, b(16)-196++, b(17)-98, b(17), b(17)-98++

**Matched y ions:** y(3), y(5), y(6), y(7), y(8), y(10)++, y(10), y(11), y(11)-98, y(12), y(12)-98, y(14), y(14)++, y(14)-98, y(14)-196, y(15), y(17)-98++, y(17)++

**Precursor origin neutral loss:** +

## Peptide No.283

**GGISEASGEESVPLGDR**

**Confirmed sites:** @S:3,@S:8

**Ambiguous sites:**

MS/MS Fragmentation of **GGISEASGEESVPLGDR**

Found in **JSPR1\_MOUSE**, Junctional sarcoplasmic reticulum protein 1 OS=Mus musculus GN=Jsrp1 PE=1 SV=2

Match to Query 4501: 1939.802324 from(970.908438,2+)

Title: Elution from: 41.508 to 41.508 scan no 3648 cid35.00 polarity:+:MA10



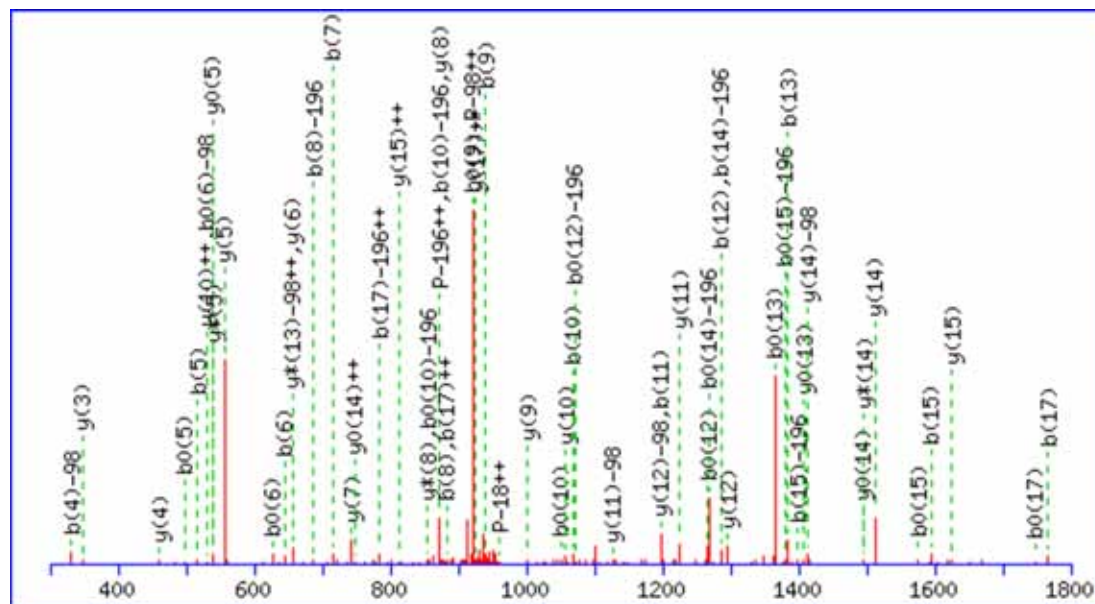

**Monoisotopic mass of neutral peptide Mr(calc):** 1939.8025

**Fixed modifications:** Carbamidomethyl (C) (apply to specified residues or termini only)

**Variable modifications:**

**N-term :** Dimethyl:2H(4)13C(2) (N-term)

**S3 :** Phospho (ST), with neutral losses 0.0000(shown in table), 97.9769

**S8 :** Phospho (ST), with neutral losses 0.0000(shown in table), 97.9769

**Ions Score:** 79 **Expect:** 3.5e-007

**Matched b ions:** b(4)-98, b(5), b(6), b(7), b(8)-98, b(8)-196, b(8), b(9), b(9)-98, b(10)-196, b(10), b(11)-98, b(11), b(12), b(13), b(13)-98, b(14)-196, b(15), b(15)-98, b(15)-196, b(17)-98, b(17), b(17)-196++, b(17)-98++, b(17)++

**Matched y ions:** y(3), y(4), y(5), y(6), y(7), y(8), y(9), y(10)++, y(10), y(11), y(11)-98, y(12)-98, y(12), y(14), y(14)-98, y(15), y(15)++, y(17)-98++, y(17)++

**Precursor origin neutral loss:** +

## Peptide No.284

**GGISEASGEESVPLGDR**

**Confirmed sites:** @S:5

**Ambiguous sites:**

MS/MS Fragmentation of **GGISEASGEESVPLGDR**

Found in **JSPR1\_MOUSE**, Junctional sarcoplasmic reticulum protein 1 OS=Mus musculus GN=Jsrp1 PE=1 SV=2

Match to Query 3716: 1859.836802 from(930.925677,2+)

Title: Elution from: 38.422 to 38.422 scan no 3239 cid35.00 polarity:+:MA10

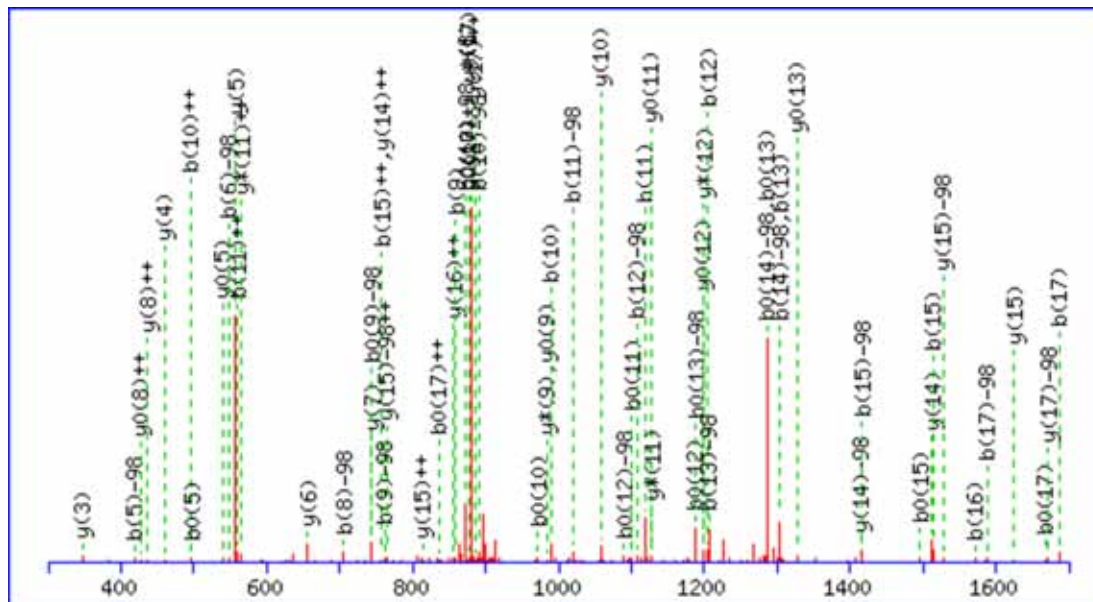

**Monoisotopic mass of neutral peptide Mr(calc):** 1859.8362

**Fixed modifications:** Carbamidomethyl (C) (apply to specified residues or termini only)

**Variable modifications:**

**N-term :** Dimethyl:2H(4)13C(2) (N-term)

**S5 :** Phospho (ST), with neutral losses 97.9769(shown in table), 0.0000

**Ions Score:** 91 **Expect:** 3.4e-008

**Matched b ions:** b(5)-98, b(6)-98, b(8)-98, b(9)-98, b(9), b(10), b(10)++, b(10)-98, b(11), b(11)++, b(11)-98, b(12)-98, b(12), b(13)-98, b(13), b(14)-98, b(15)-98, b(15), b(15)++, b(16), b(17)-98, b(17)

**Matched y ions:** y(3), y(4), y(5), y(6), y(7), y(8), y(8)++, y(10), y(14)-98, y(14), y(14)++, y(15)-98++, y(15)-98, y(15), y(15)++, y(16)++, y(17)-98, y(17)++

**Precursor origin neutral loss:** +

## Peptide No.285

**GGISEASGEESVPLGDR**

**Confirmed sites:** @S:5,@S:8

**Ambiguous sites:**

MS/MS Fragmentation of **GGISEASGEESVPLGDR**

Found in **JSPR1\_MOUSE**, Junctional sarcoplasmic reticulum protein 1 OS=Mus musculus GN=Jsrp1 PE=1 SV=2

Match to Query 4673: 1939.803002 from(970.908777,2+)

Title: Elution from: 41.850 to 41.850 scan no 3718 cid35.00 polarity:+MA10

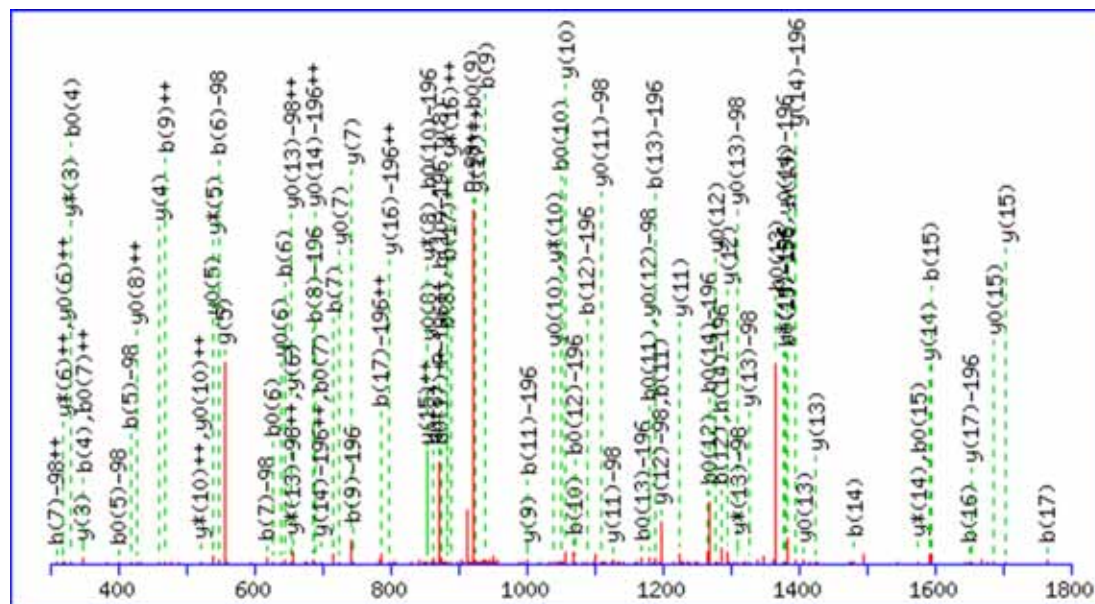

**Monoisotopic mass of neutral peptide Mr(calc):** 1939.8025

**Fixed modifications:** Carbamidomethyl (C) (apply to specified residues or termini only)

**Variable modifications:**

**N-term :** Dimethyl:2H(4)13C(2) (N-term)

**S5 :** Phospho (ST), with neutral losses 0.0000(shown in table), 97.9769

**S8 :** Phospho (ST), with neutral losses 0.0000(shown in table), 97.9769

**Ions Score:** 71 **Expect:** 2.4e-006

**Matched b ions:** b(4), b(5)-98, b(6)-98, b(6), b(7)-98, b(7), b(7)-98++, b(8)-98, b(8)-196, b(8), b(9)++, b(9)-98, b(9)-196, b(9), b(10)-196, b(10), b(11), b(11)-98, b(11)-196, b(12), b(12)-196, b(12)-98, b(13)-98, b(13), b(13)-196, b(14)-98, b(14)-196, b(14), b(15), b(15)-98, b(16), b(17)-98, b(17), b(17)-196++, b(17)++

**Matched y ions:** y(3), y(4), y(5), y(6), y(7), y(8), y(9), y(10), y(11), y(11)-98, y(12)-98, y(12), y(13), y(13)-98, y(14)-98, y(14), y(14)-196, y(14)-196++, y(15), y(15)-98++, y(15)++, y(16)-196++, y(16)-98++, y(17)-196, y(17)-98++, y(17)++

**Precursor origin neutral loss:** +

## Peptide No.286

**GGISEASGEESVPLGDR**

**Confirmed sites:** @S:8

**Ambiguous sites:**

MS/MS Fragmentation of **GGISEASGEESVPLGDR**

Found in **JSPR1\_MOUSE**, Junctional sarcoplasmic reticulum protein 1 OS=Mus musculus GN=Jsrp1 PE=1 SV=2

Match to Query 4185: 1859.836510 from(930.925531,2+)

Title: Elution from: 38.448 to 38.448 scan no 3296 cid35.00 polarity:+:MA10

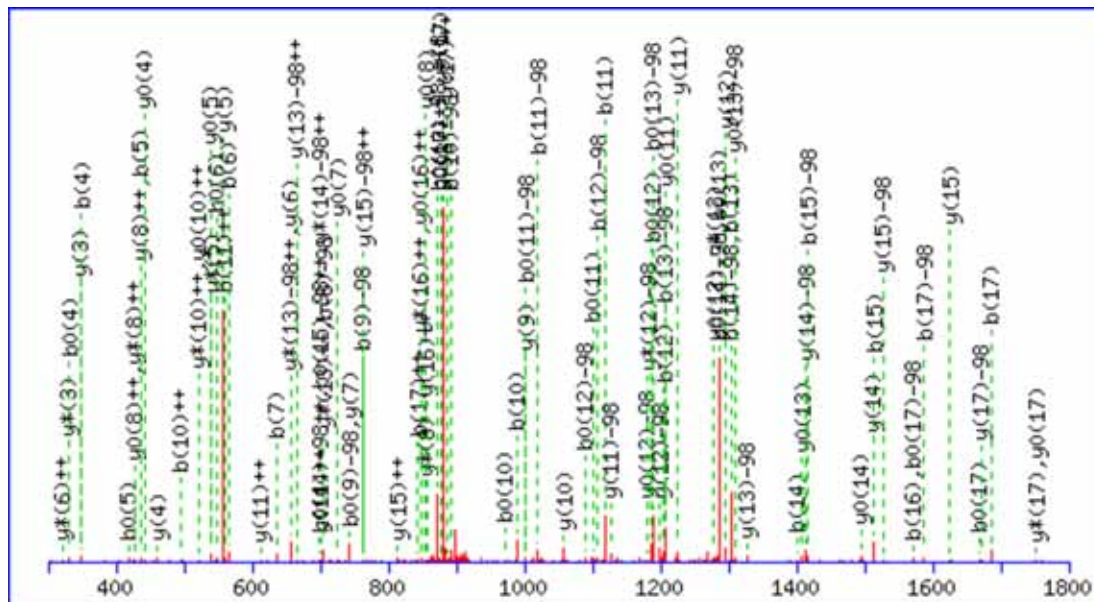

**Monoisotopic mass of neutral peptide Mr(calc):** 1859.8362

**Fixed modifications:** Carbamidomethyl (C) (apply to specified residues or termini only)

**Variable modifications:**

**N-term :** Dimethyl:2H(4)13C(2) (N-term)

**S8 :** Phospho (ST), with neutral losses 97.9769(shown in table), 0.0000

**Ions Score:** 86 **Expect:** 1.2e-007

**Matched b ions:** b(4), b(5), b(6), b(7), b(8)-98, b(9)-98, b(10), b(10)++, b(10)-98, b(11), b(11)-98, b(11)++, b(12), b(12)-98, b(13), b(13)-98, b(14)-98, b(14), b(14)++, b(15), b(15)-98, b(16), b(17), b(17)-98, b(17)++

**Matched y ions:** y(3), y(4), y(5), y(6), y(7), y(8)++, y(8), y(9), y(10), y(11)-98, y(11)++, y(11), y(12)-98, y(12), y(13)-98, y(13)-98++, y(14)-98, y(14), y(15), y(15)-98, y(15)-98++, y(15)++, y(16)++, y(17)-98, y(17)++

**Precursor origin neutral loss:** +

## Peptide No.287

**GGISEASGEESVPLGDRGSQEKPR**

**Confirmed sites:** @S:8,@S:20

**Ambiguous sites:**

**MS/MS Fragmentation of GGSISEASGEESVPLGDRGSQEKPR**

Found in **JSPR1\_MOUSE**, Junctional sarcoplasmic reticulum protein 1 OS=Mus musculus GN=Jspr1 PE=1 SV=2

Match to Query 7149: 2744.207292 from(915.743040,3+)

Title: Elution from: 34.626 to 34.626 scan no 2732 cid35.00 polarity:+:MA10:m1s



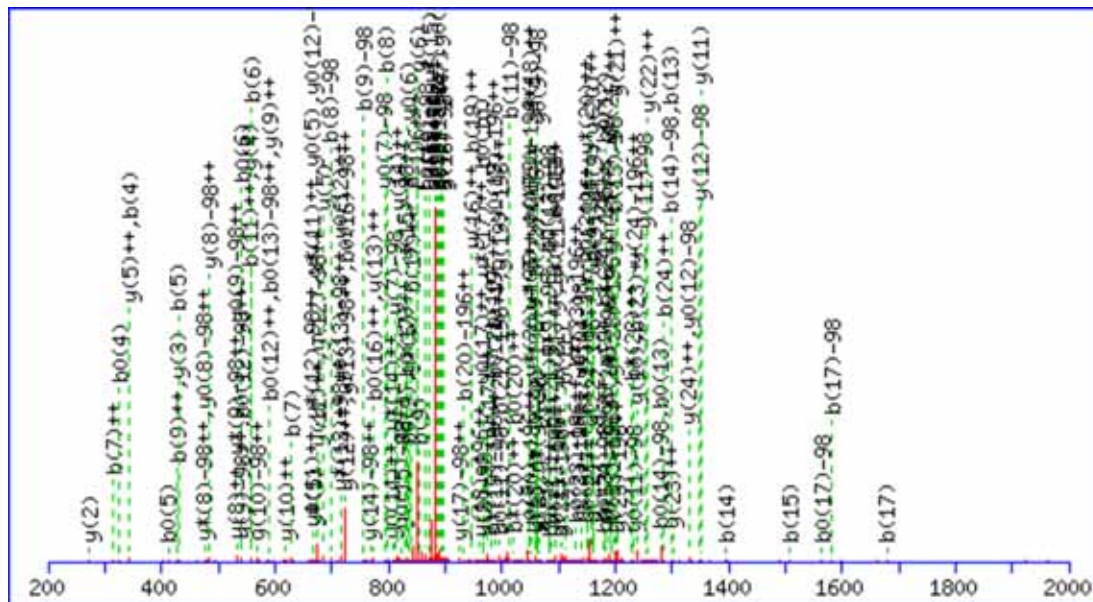

**Monoisotopic mass of neutral peptide Mr(calc):** 2744.2055

**Fixed modifications:** Carbamidomethyl (C) (apply to specified residues or termini only)

**Variable modifications:**

**N-term :** Dimethyl (N-term)

**S8 :** Phospho (ST), with neutral losses 0.0000(shown in table), 97.9769

**S20 :** Phospho (ST), with neutral losses 0.0000(shown in table), 97.9769

**K23 :** Dimethyl (K)

**Ions Score:** 62 **Expect:** 5.2e-005

**Matched b ions:** b(4), b(5), b(6), b(7), b(7)++, b(8)-98, b(8), b(9)++, b(9)-98, b(9), b(10)-98, b(10), b(11), b(11)++, b(11)-98, b(13), b(13)-98, b(14), b(14)-98, b(15), b(17)-98, b(17), b(17)++, b(19)++, b(20)-98, b(20)-196, b(21)-98, b(21)-196, b(21)++, b(22)-98, b(22)-196, b(22)++, b(23)++, b(23)-98, b(23)-196, b(24)-98, b(24)-196, b(24)++

**Matched y ions:** y(2), y(3), y(4), y(5)++, y(5), y(6), y(7)-98, y(8)++, y(8)-98, y(8)-98, y(8), y(9)++, y(9)-98, y(9)-98, y(9), y(10)++, y(10), y(10)-98, y(10)-98, y(11)++, y(11)-98, y(11), y(12)++, y(12)-98, y(12)-98, y(13)-98, y(13)++, y(14)++, y(14)-98, y(15)++, y(15)-98, y(16)-98, y(16)++, y(17)++, y(17)-98, y(18)-98, y(18)++, y(18)-196, y(19)-98, y(19)++, y(19)-196, y(20)-196, y(20)-98, y(20)++, y(21)-98, y(21)++, y(21)-196, y(22)-98, y(22)-196, y(22)++, y(23)++, y(23)-98, y(23)-196, y(24)-98, y(24)++, y(24)-196

**Precursor origin neutral loss:** +

## Peptide No.288

**GGSSGEELEDEEPVK**

**Confirmed sites:** @S:3,@S:4

**Ambiguous sites:**

MS/MS Fragmentation of **GGSSGEELEDEEPVK**

Found in **HDGR2\_MOUSE**, Hepatoma-derived growth factor-related protein 2 OS=Mus musculus  
GN=Hdgfrp2 PE=1 SV=1

Match to Query 4167: 1776.674490 from(889.344521,2+)

Title: Elution from: 39.734 to 39.734 scan no 3630 cid35.00 polarity:+:MA10

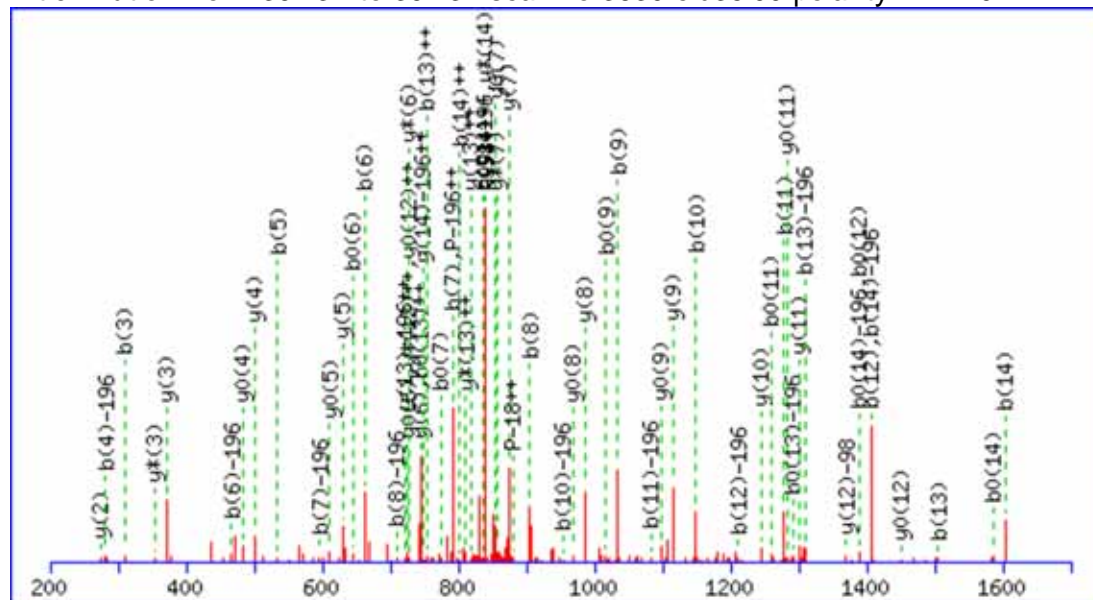

**Monoisotopic mass of neutral peptide Mr(calc):** 1776.6743

**Fixed modifications:** Carbamidomethyl (C) (apply to specified residues or termini only)

**Variable modifications:**

**N-term :** Dimethyl (N-term)

**S3 :** Phospho (ST), with neutral losses 0.0000(shown in table), 97.9769

**S4 :** Phospho (ST), with neutral losses 0.0000(shown in table), 97.9769

**K15 :** Dimethyl (K)

**Ions Score:** 79 **Expect:** 2e-007

**Matched b ions:** b(3), b(4)-196, b(4)-98, b(5)-98, b(5), b(6), b(6)-98, b(6)-196, b(7), b(7)-98, b(7)-196, b(8), b(8)-196, b(8)-98, b(9), b(9)-98, b(9)-196, b(10), b(10)-98, b(10)-196, b(11), b(11)-98, b(11)-196, b(12), b(12)-98, b(12)-196, b(13)-98, b(13), b(13)-196, b(13)++, b(14)-196, b(14)-98, b(14), b(14)-98++, b(14)++

**Matched y ions:** y(2), y(3), y(4), y(5), y(6), y(7), y(8), y(9), y(10), y(11), y(12)-98, y(13)-196++, y(13)++, y(14)-196++, y(14)-98++

**Precursor origin neutral loss:** +

## Peptide No.289

**GGSSGEELEDEEPVK**

**Confirmed sites:** @S:3,@S:4

**Ambiguous sites:**

MS/MS Fragmentation of **GGSSGEELEDEEPVK**

Found in **HDGR2\_MOUSE**, Hepatoma-derived growth factor-related protein 2 OS=Mus musculus  
GN=Hdgfrp2 PE=1 SV=1

Match to Query 3297: 1788.738290 from(895.376421,2+)

Title: Elution from: 39.619 to 39.619 scan no 3422 cid35.00 polarity:+:MA10

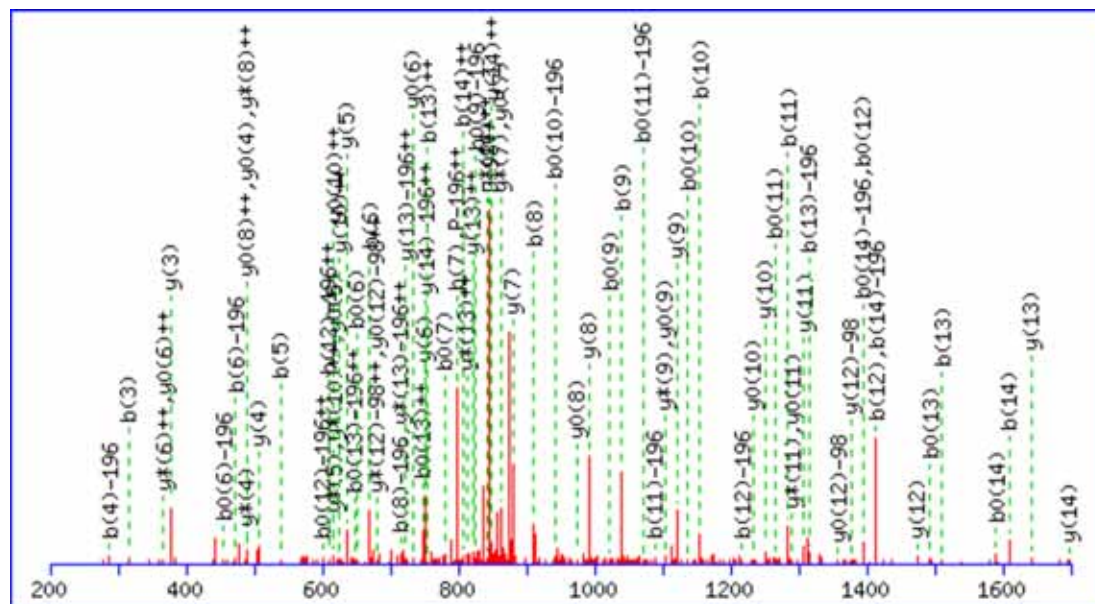

**Monoisotopic mass of neutral peptide Mr(calc): 1788.7380**

**Fixed modifications:** Carbamidomethyl (C) (apply to specified residues or termini only)

**Variable modifications:**

**N-term :** Dimethyl:2H(4)13C(2) (N-term)

**S3 :** Phospho (ST), with neutral losses 0.0000(shown in table), 97.9769

**S4 :** Phospho (ST), with neutral losses 0.0000(shown in table), 97.9769

**K15 :** Dimethyl:2H(4)13C(2) (K)

**Ions Score: 80 Expect: 2.7e-007**

**Matched b ions:** b(3), b(4)-196, b(4)-98, b(5)-98, b(5), b(6), b(6)-196, b(6)-98, b(7), b(7)-98, b(8), b(8)-196, b(8)-98, b(9), b(9)-98, b(10), b(10)-98, b(11), b(11)-196, b(11)-98++, b(12), b(12)-98, b(12)-196++, b(12)-196, b(13)-98, b(13), b(13)-196, b(13)++, b(14)-196, b(14), b(14)-98, b(14)-98++, b(14)++

**Matched y ions:** y(3), y(4), y(5), y(6), y(7), y(8), y(9), y(10), y(10)++, y(11), y(12), y(12)-98, y(13), y(13)-196++, y(13)++, y(14), y(14)-196++, y(14)-98++, y(14)++

**Precursor origin neutral loss:** +

## Peptide No.290

**GGSSGEELEDEEPVKK**

**Confirmed sites: @S:3,@S:4**

**Ambiguous sites:**

MS/MS Fragmentation of **GGSSGEELEDEEPVKK**

Found in **HDGR2\_MOUSE**, Hepatoma-derived growth factor-related protein 2 OS=Mus musculus  
GN=Hdgrp2 PE=1 SV=1

Match to Query 5282: 1932.801447 from(645.274425,3+)

Title: Elution from: 34.341 to 34.341 scan no 2898 cid35.00 polarity:+:MA10





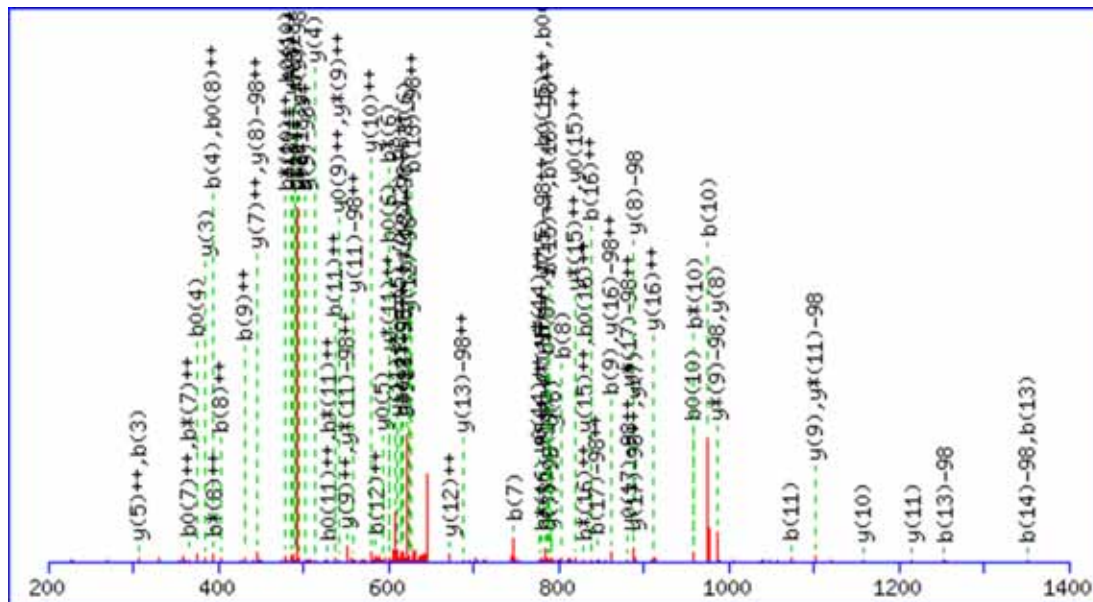

**Monoisotopic mass of neutral peptide Mr(calc):** 1960.8819

**Fixed modifications:** Carbamidomethyl (C) (apply to specified residues or termini only)

**Variable modifications:**

**N-term :** Dimethyl (N-term)

**T13 :** Phospho (ST), with neutral losses 0.0000(shown in table), 97.9769

**K18 :** Dimethyl (K)

**Ions Score:** 53 **Expect:** 0.00029

**Matched b ions:** b(3), b(4), b(5), b(6), b(7), b(8)++, b(8), b(9), b(9)++, b(10), b(10)++, b(11), b(11)++, b(12)++, b(13), b(13)-98, b(13)-98++, b(14)-98, b(15)++, b(16)-98++, b(16)++, b(17)-98++

**Matched y ions:** y(3), y(4), y(5)++, y(5), y(6), y(7), y(7)++, y(7)-98, y(8)++, y(8)-98++, y(8), y(8)-98, y(9), y(9)++, y(9)-98++, y(10), y(10)++, y(11)++, y(11), y(11)-98++, y(12)++, y(12)-98++, y(13)-98++, y(14)++, y(15)-98++, y(15)++, y(16)-98++, y(16)++, y(17)-98++

**Precursor origin neutral loss:** +

## Peptide No.292

**GGYSPQEGGDPPTPEPLK**

**Confirmed sites:** @Y:3,@T:13

**Ambiguous sites:**

MS/MS Fragmentation of **GGYSPQEGGDPPTPEPLK**

Found in **MURC\_MOUSE**, Muscle-related coiled-coil protein OS=Mus musculus GN=Murc PE=2 SV=1

Match to Query 5775: 2040.849910 from(1021.432231,2+)

Title: Elution from: 41.779 to 41.779 scan no 3901 cid35.00 polarity:+:MA10:m1s

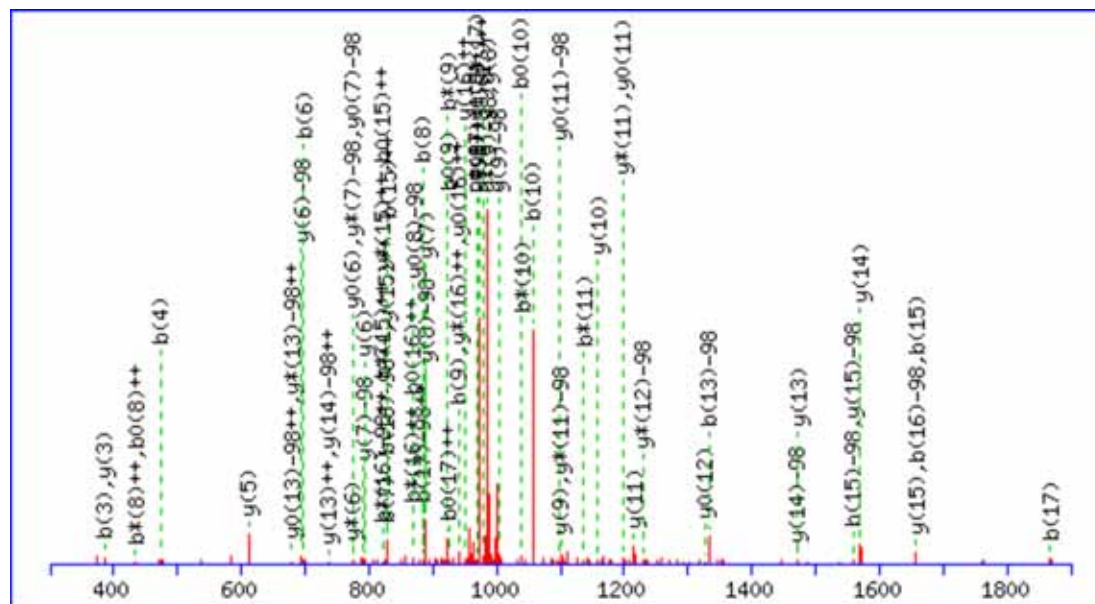

**Monoisotopic mass of neutral peptide Mr(calc):** 2040.8483

**Fixed modifications:** Carbamidomethyl (C) (apply to specified residues or termini only)

**Variable modifications:**

**N-term :** Dimethyl (N-term)

**Y3 :** Phospho (Y)

**T13 :** Phospho (ST), with neutral losses 97.9769(shown in table), 0.0000

**K18 :** Dimethyl (K)

**Ions Score:** 43 **Expect:** 0.0018

**Matched b ions:** b(3), b(4), b(6), b(7), b(8), b(9), b(10), b(13)-98, b(15), b(15)-98, b(15)++, b(16)-98, b(16)-98++, b(17), b(17)-98++

**Matched y ions:** y(3), y(5), y(6)-98, y(6), y(7)-98, y(7), y(8), y(8)-98, y(9), y(9)-98, y(10), y(11), y(13), y(13)++, y(14)-98, y(14), y(14)-98++, y(15), y(15)-98, y(15)++, y(16)++, y(17)++

**Precursor origin neutral loss:** +

## Peptide No.293

**GGYSPQEGGDPPTPEPLK**

**Confirmed sites:** @T:13

**Ambiguous sites:**

MS/MS Fragmentation of **GGYSPQEGGDPPTPEPLK**

Found in **MURC\_MOUSE**, Muscle-related coiled-coil protein OS=Mus musculus GN=Murc PE=2 SV=1

Match to Query 6375: 1972.945854 from(658.655894,3+)

Title: Elution from: 38.120 to 38.120 scan no 3374 cid35.00 polarity:+:MA10:m1s

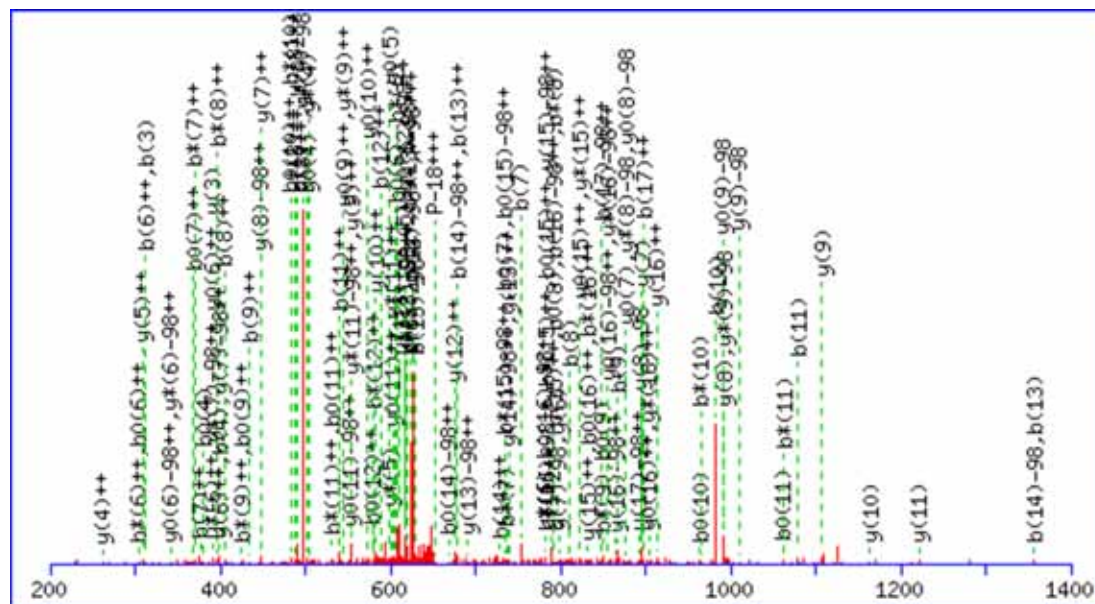

**Monoisotopic mass of neutral peptide Mr(calc):** 1972.9456

**Fixed modifications:** Carbamidomethyl (C) (apply to specified residues or termini only)

**Variable modifications:**

**N-term :** Dimethyl:2H(4)13C(2) (N-term)

**T13 :** Phospho (ST), with neutral losses 0.0000(shown in table), 97.9769

**K18 :** Dimethyl:2H(4)13C(2) (K)

**Ions Score:** 36 **Expect:** 0.016

**Matched b ions:** b(3), b(4), b(5), b(6)++, b(6), b(7), b(7)++, b(8)++, b(8), b(9), b(9)++, b(10), b(10)++, b(11), b(11)++, b(12)++, b(13), b(13)-98++, b(13)++, b(14)-98, b(14)-98++, b(14)++, b(15)++, b(16)-98++, b(17)-98++, b(17)++

**Matched y ions:** y(3), y(4)++, y(5)++, y(5), y(6)++, y(6), y(7)-98++, y(7), y(7)++, y(7)-98, y(8)++, y(8), y(8)-98++, y(8)-98, y(9), y(9)++, y(9)-98, y(10), y(10)++, y(11), y(11)++, y(12)-98++, y(12)++, y(13)-98++, y(13)++, y(14)++, y(14)-98++, y(15)-98++, y(15)++, y(16)++, y(16)-98++, y(17)-98++

**Precursor origin neutral loss:** +

## Peptide No.294

**GHPSAGAEEEGGSDGSAAEAEP**R

**Confirmed sites:** @S:13,@S:16

**Ambiguous sites:**

MS/MS Fragmentation of **GHPSAGAEEEGGSDGSAAEAEP**R

Found in **EIF3B\_MOUSE**, Eukaryotic translation initiation factor 3 subunit B OS=Mus musculus  
GN=Eif3b PE=1 SV=1

Match to Query 6315: 2354.869476 from(785.963768,3+)

Title: Elution from: 24.937 to 24.937 scan no 1459 cid35.00 polarity:+:MA10:m1s

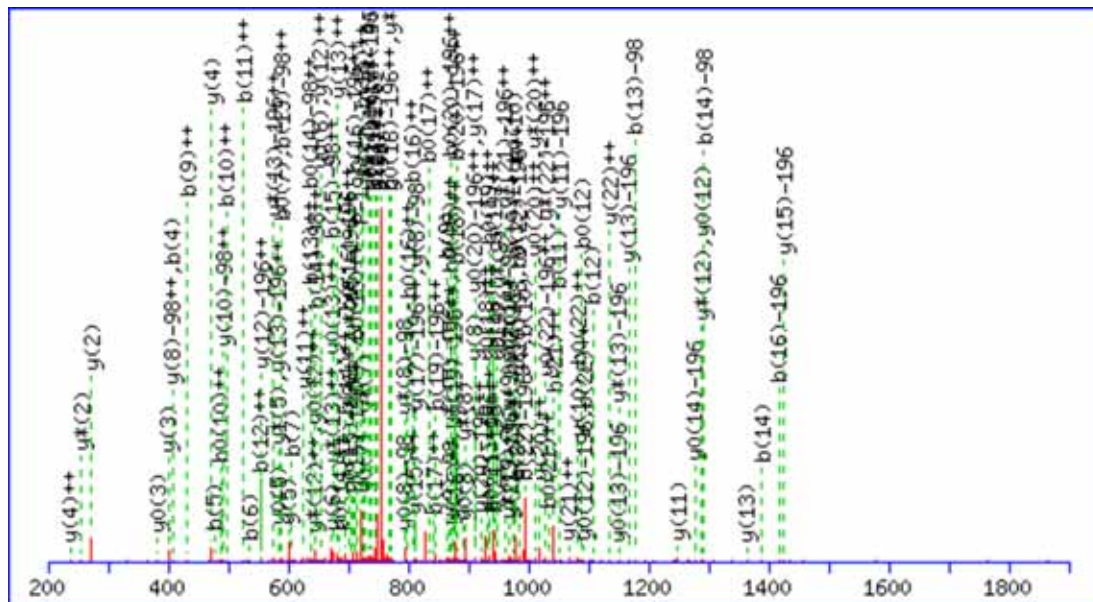

**Monoisotopic mass of neutral peptide Mr(calc):** 2354.8689

**Fixed modifications:** Carbamidomethyl (C) (apply to specified residues or termini only)

**Variable modifications:**

**N-term :** Dimethyl (N-term)

**S13 :** Phospho (ST), with neutral losses 97.9769(shown in table), 0.0000

**S16 :** Phospho (ST), with neutral losses 97.9769(shown in table), 0.0000

**Ions Score:** 61 **Expect:** 1.4e-005

**Matched b ions:** b(4), b(5), b(6), b(7), b(8), b(9)++, b(9), b(10), b(10)++, b(11)++, b(11), b(12)++, b(12), b(13)-98, b(13)-98++, b(13)++, b(14), b(14)-98++, b(14)-98, b(14)++, b(15)-98++, b(15)++, b(16)-196, b(16)-196++, b(16)-98++, b(16)++, b(17)-196++, b(17)-98++, b(17)++, b(18)-98++, b(18)++, b(19)-98++, b(19)++, b(19)-196++, b(20)-98++, b(20)++, b(20)-196++, b(21)-98++, b(21)++, b(21)-196++, b(22)-196++, b(22)-98++, b(22)++

**Matched y ions:** y(2), y(3), y(4), y(4)++, y(5), y(6), y(7), y(8)-98++, y(8)-98, y(8), y(9)-98, y(9), y(10), y(10)-98, y(10)-98++, y(11), y(11)-98++, y(11)-98, y(11)++, y(11)-196, y(12)-98, y(12)-196++, y(12)-98++, y(12)++, y(13), y(13)-196, y(13)-98++, y(13)++, y(13)-98, y(13)-196++, y(14)++, y(15)-196, y(15)-196++, y(15)-98++, y(15)++, y(16)++, y(16)-98++, y(17)-196++, y(17)++, y(18)-98++, y(18)++, y(19)-196++, y(19)-98++, y(19)++, y(20)++, y(20)-196++, y(20)-98++, y(21)-98++, y(21)++, y(21)-196++, y(22)-98++, y(22)++

**Precursor origin neutral loss:** +

## Peptide No.295

**GHPSAGAE E EGGSDGSAAEA EPR**

**Confirmed sites: @S:13,@S:16**

**Ambiguous sites:**

MS/MS Fragmentation of **GHPSAGAE E EGGSDGSAAEA EPR**

Found in **EIF3B\_MOUSE**, Eukaryotic translation initiation factor 3 subunit B OS=Mus musculus  
GN=Eif3b PE=1 SV=1

Match to Query 7785: 2360.902485 from(787.974771,3+)



Title: Elution from: 24.847 to 24.847 scan no 1519 cid35.00 polarity:+:MA10:m1s

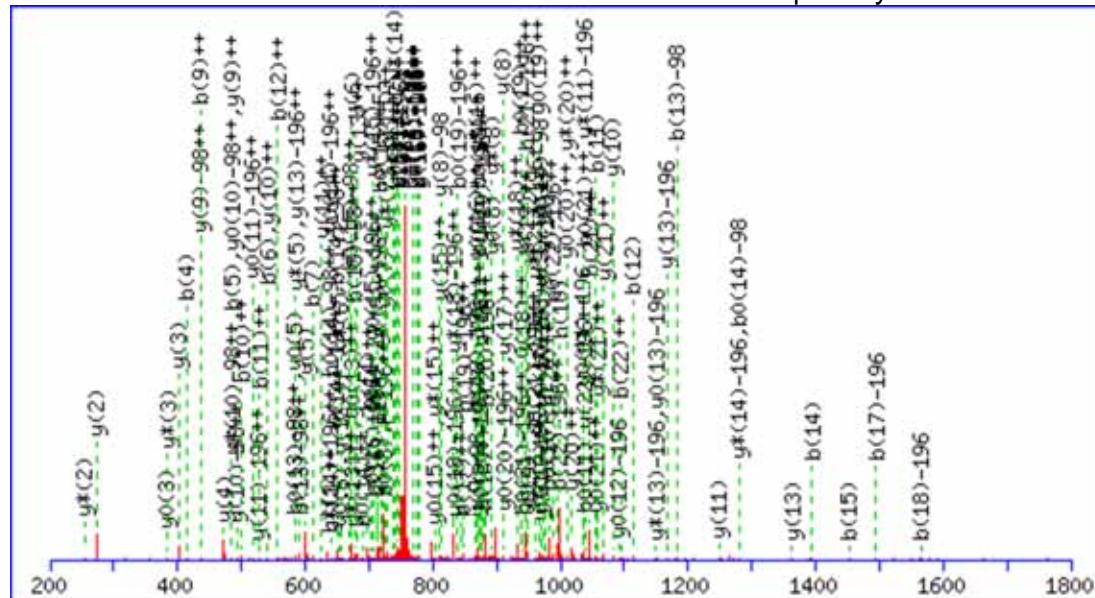

**Monoisotopic mass of neutral peptide Mr(calc):** 2360.9007

**Fixed modifications:** Carbamidomethyl (C) (apply to specified residues or termini only)

**Variable modifications:**

**N-term :** Dimethyl:2H(4)13C(2) (N-term)

**S13 :** Phospho (ST), with neutral losses 97.9769(shown in table), 0.0000

**S16 :** Phospho (ST), with neutral losses 97.9769(shown in table), 0.0000

**Ions Score:** 58 **Expect:** 3.8e-005

**Matched b ions:** b(4), b(5), b(6), b(7), b(8), b(9), b(9)++, b(10)++, b(10), b(11), b(11)++, b(12), b(12)++, b(13)-98, b(13)-98++, b(13)++, b(14), b(14)-98++, b(14)++, b(15), b(15)++, b(15)-98++, b(16)-98, b(16)-98++, b(16)-196++, b(17)-98, b(17)-196, b(17)-98++, b(17)-196++, b(17)++, b(18)-98, b(18)-196, b(18)-98++, b(18)++, b(19)-98++, b(19)++, b(19)-196++, b(20)-98++, b(20)++, b(20)-196++, b(21)-98++, b(21)++, b(21)-196++, b(22)-98++, b(22)-196++, b(22)++

**Matched y ions:** y(2), y(3), y(4), y(5), y(6), y(7), y(8)-98, y(8), y(9)++, y(9)-98++, y(9), y(9)-98, y(10), y(10)-98++, y(10)++, y(11), y(11)-196++, y(11)-98, y(11)-98++, y(11)++, y(12)-98, y(12)-98++, y(12)++, y(13)-196, y(13)-98, y(13), y(13)-98++, y(13)-196++, y(13)++, y(14)-98, y(14)-196++, y(14)-98++, y(14)++, y(15)-98++, y(15)-196++, y(15)++, y(16)-196++, y(16)-98++, y(16)++, y(17)-98++, y(17)++, y(18)-98++, y(18)++, y(19)-196++, y(19)-98++, y(19)++, y(20)++, y(20)-98++, y(21)++, y(21)-98++, y(21)-196++, y(22)-196++

**Precursor origin neutral loss:** +

## Peptide No.296

**GILAADESTGSIK**

**Confirmed sites:** @S:11

**Ambiguous sites:**

MS/MS Fragmentation of **GILAADESTGSIK**

Found in **ALDOA\_MOUSE**, Fructose-bisphosphate aldolase A OS=Mus musculus GN=Aldoa PE=1 SV=2

Match to Query 2291: 1467.723068 from(734.868810,2+)

Title: Elution from: 38.746 to 38.746 scan no 3498 cid35.00 polarity:+:MA10

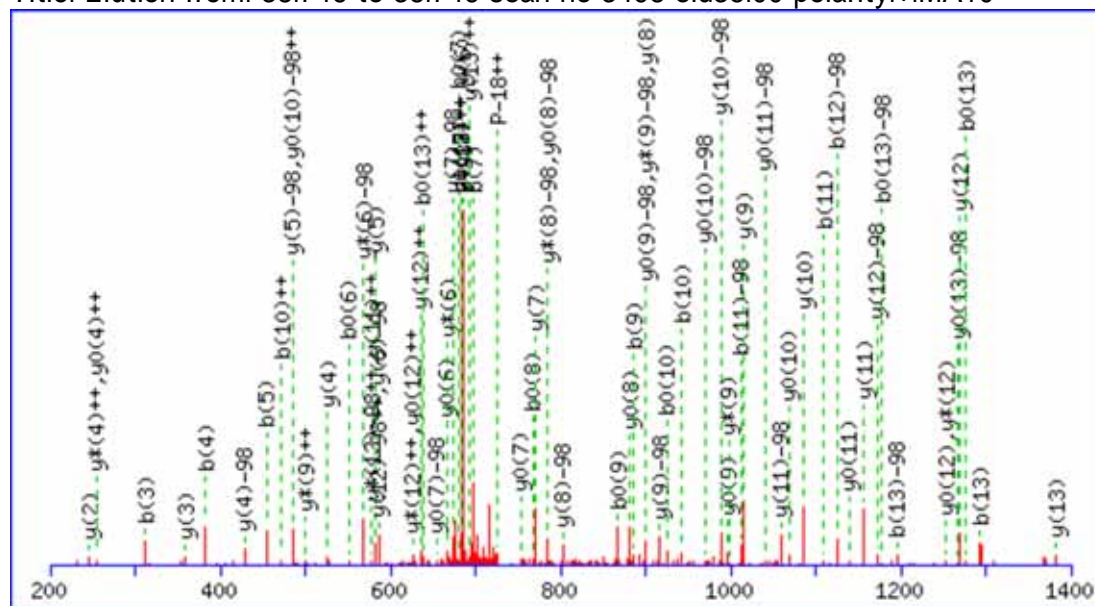

**Monoisotopic mass of neutral peptide Mr(calc): 1467.7222**

**Fixed modifications:** Carbamidomethyl (C) (apply to specified residues or termini only)

**Variable modifications:**

**N-term :** Dimethyl (N-term)

**S11 :** Phospho (ST), with neutral losses 97.9769(shown in table), 0.0000

**K14 :** Dimethyl (K)

**Ions Score:** 96 **Expect:** 1.3e-008

**Matched b ions:** b(3), b(4), b(5), b(6), b(7), b(8), b(9), b(10), b(10)++, b(11)-98, b(11), b(12)-98, b(13)-98, b(13)

**Matched y ions:** y(2), y(3), y(4)-98, y(4), y(5)-98, y(5), y(6)-98, y(6), y(7), y(7)-98, y(8)-98, y(8), y(9), y(9)-98, y(10), y(10)-98, y(11), y(11)-98, y(11)++, y(12), y(12)-98++, y(12)-98, y(12)++, y(13), y(13)++

**Precursor origin neutral loss:** +

## Peptide No.297

**GILAADESTGSIK**

**Confirmed sites: @S:8**

**Ambiguous sites:**

MS/MS Fragmentation of **GILAADESTGSIK**

Found in **ALDOA\_MOUSE**, Fructose-bisphosphate aldolase A OS=Mus musculus GN=Aldoa PE=1 SV=2

Match to Query 1670: 1467.723256 from(734.868904,2+)

Title: Elution from: 40.102 to 40.102 scan no 3469 cid35.00 polarity:+:MA10



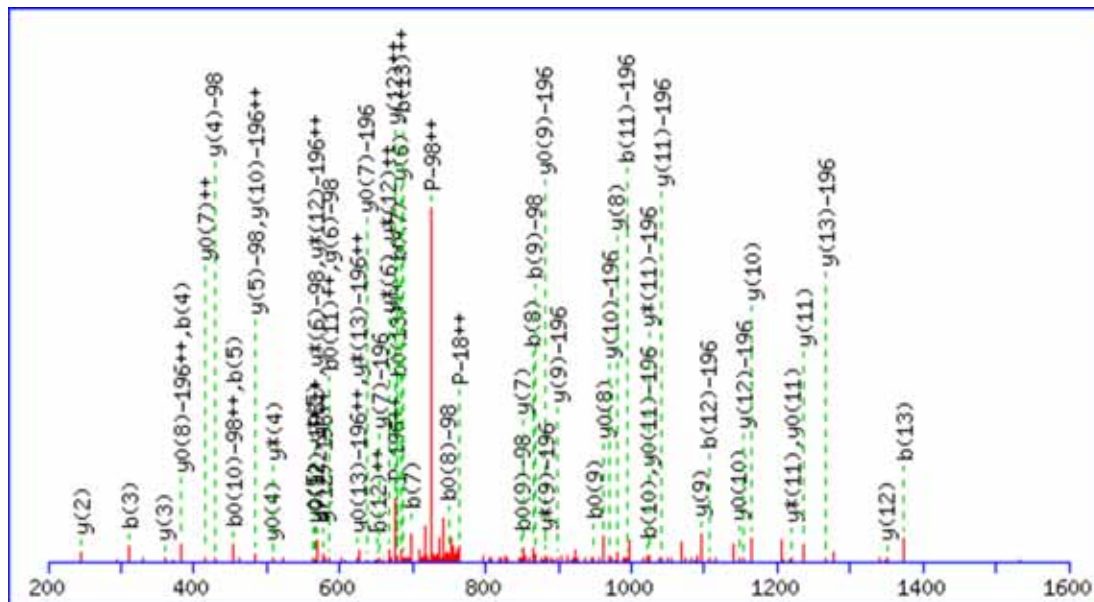

**Monoisotopic mass of neutral peptide Mr(calc):** 1547.6885

**Fixed modifications:** Carbamidomethyl (C) (apply to specified residues or termini only)

**Variable modifications:**

**N-term :** Dimethyl (N-term)

**S8 :** Phospho (ST), with neutral losses 97.9769(shown in table), 0.0000

**S11 :** Phospho (ST), with neutral losses 97.9769(shown in table), 0.0000

**K14 :** Dimethyl (K)

**Ions Score:** 42 **Expect:** 0.0023

**Matched b ions:** b(3), b(4), b(5), b(6), b(7), b(8), b(9)-98, b(10), b(11)-98, b(11)-196, b(12)-98, b(12)-196, b(12)++, b(13)-98, b(13), b(13)++

**Matched y ions:** y(2), y(3), y(4)-98, y(5)-98, y(6)-98, y(6), y(7)-98, y(7), y(7)-196, y(8), y(8)-98, y(9), y(9)-98, y(9)-196, y(10), y(10)-196++, y(10)-98, y(10)-196, y(11)-98, y(11), y(11)-196, y(12)-98++, y(12), y(12)-196++, y(12)-196, y(12)++, y(13)-196

**Precursor origin neutral loss:** +

## Peptide No.299

**GILAADESTGSIK**

**Confirmed sites:** @S:8,@T:9

**Ambiguous sites:**

MS/MS Fragmentation of **GILAADESTGSIK**

Found in **ALDOA\_MOUSE**, Fructose-bisphosphate aldolase A OS=Mus musculus GN=Aldoa PE=1 SV=2

Match to Query 2229: 1547.688892 from(774.851722,2+)

Title: Elution from: 43.617 to 43.617 scan no 3845 cid35.00 polarity:+:MA10



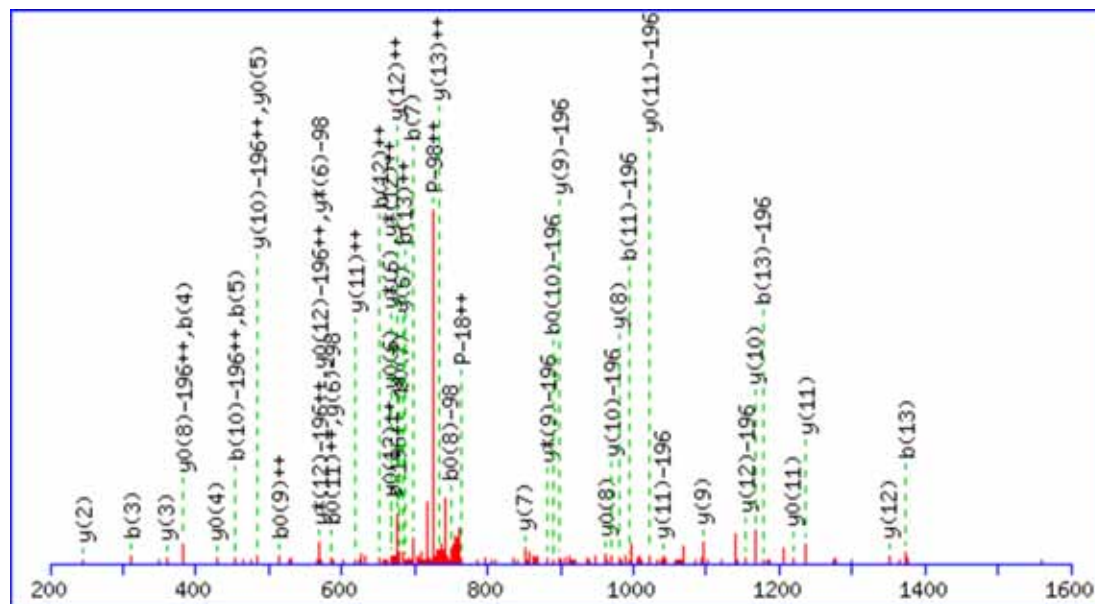

**Monoisotopic mass of neutral peptide Mr(calc):** 1547.6885

**Fixed modifications:** Carbamidomethyl (C) (apply to specified residues or termini only)

**Variable modifications:**

**N-term :** Dimethyl (N-term)

**S8 :** Phospho (ST), with neutral losses 0.0000(shown in table), 97.9769

**T9 :** Phospho (ST), with neutral losses 0.0000(shown in table), 97.9769

**K14 :** Dimethyl (K)

**Ions Score:** 42 **Expect:** 0.0025

**Matched b ions:** b(3), b(4), b(5), b(6), b(7), b(9)-98, b(9)-98++, b(10)-196++, b(10)-98, b(11)-98, b(11)-196, b(12)-98, b(12)++, b(13)-98, b(13), b(13)-196, b(13)++

**Matched y ions:** y(2), y(3), y(6)-98, y(6), y(7), y(7)-98, y(8)-98, y(8), y(9)-98, y(9), y(9)-196, y(10)-196++, y(10), y(10)-98, y(10)-196, y(11)-98, y(11), y(11)++, y(11)-196, y(12)-98++, y(12), y(12)-196, y(12)++, y(13)-98, y(13)++

**Precursor origin neutral loss:** +

## Peptide No.300

**GILAADESTGSIK**

**Confirmed sites: @T:9**

**Ambiguous sites:**

MS/MS Fragmentation of **GILAADESTGSIK**

Found in **ALDOA\_MOUSE**, Fructose-bisphosphate aldolase A OS=Mus musculus GN=Aldoa PE=1 SV=2

Match to Query 2000: 1467.722990 from(734.868771,2+)

Title: Elution from: 38.619 to 38.619 scan no 3288 cid35.00 polarity:+:MA10

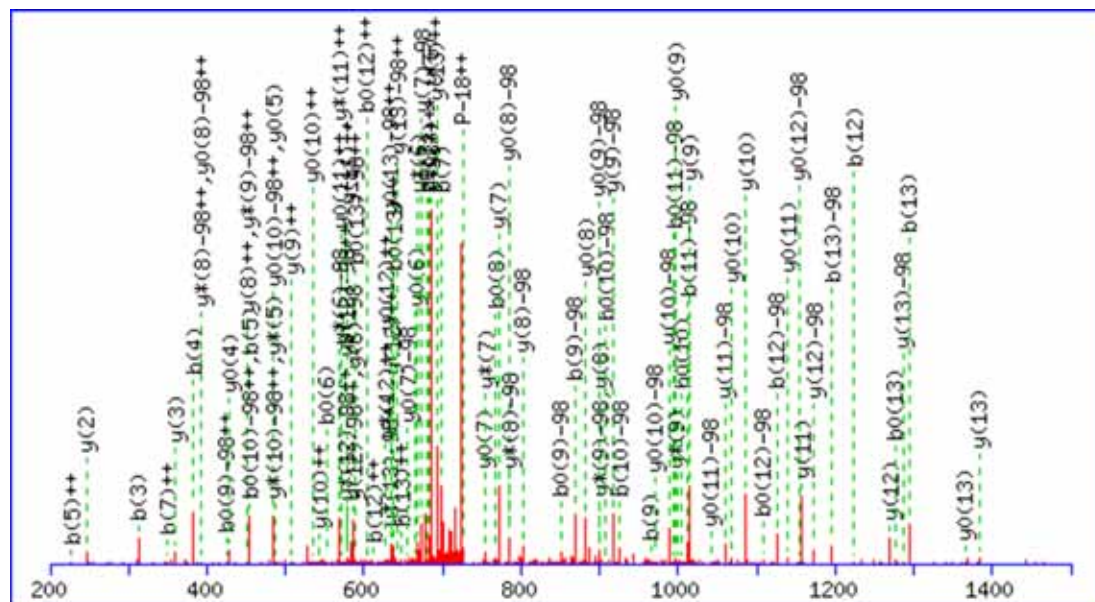

**Monoisotopic mass of neutral peptide Mr(calc):** 1467.7222

**Fixed modifications:** Carbamidomethyl (C) (apply to specified residues or termini only)

**Variable modifications:**

**N-term :** Dimethyl (N-term)

**T9 :** Phospho (ST), with neutral losses 97.9769(shown in table), 0.0000

**K14 :** Dimethyl (K)

**Ions Score:** 81 **Expect:** 3.6e-007

**Matched b ions:** b(3), b(4), b(5), b(5)++, b(6), b(7), b(7)++, b(8), b(8)++, b(9)-98, b(9), b(10)-98, b(11)-98, b(12)-98, b(12), b(12)++, b(13), b(13)-98, b(13)++

**Matched y ions:** y(2), y(3), y(6)-98, y(6), y(7), y(7)-98, y(8)-98, y(8), y(8)++, y(9), y(9)-98, y(9)++, y(10), y(10)-98, y(10)++, y(11), y(11)-98, y(11)++, y(12)-98++, y(12), y(12)-98, y(12)++, y(13), y(13)++, y(13)-98++, y(13)-98

**Precursor origin neutral loss:** +

## Peptide No.301

**GILAADESTGSIK**

**Confirmed sites:** @T:9,@S:11

**Ambiguous sites:**

**MS/MS Fragmentation of** **GILAADESTGSIK**

Found in **ALDOA\_MOUSE**, Fructose-bisphosphate aldolase A OS=Mus musculus GN=Aldoa PE=1 SV=2

Match to Query 2111: 1547.688488 from(774.851520,2+)

Title: Elution from: 43.603 to 43.603 scan no 3911 cid35.00 polarity:+:MA10

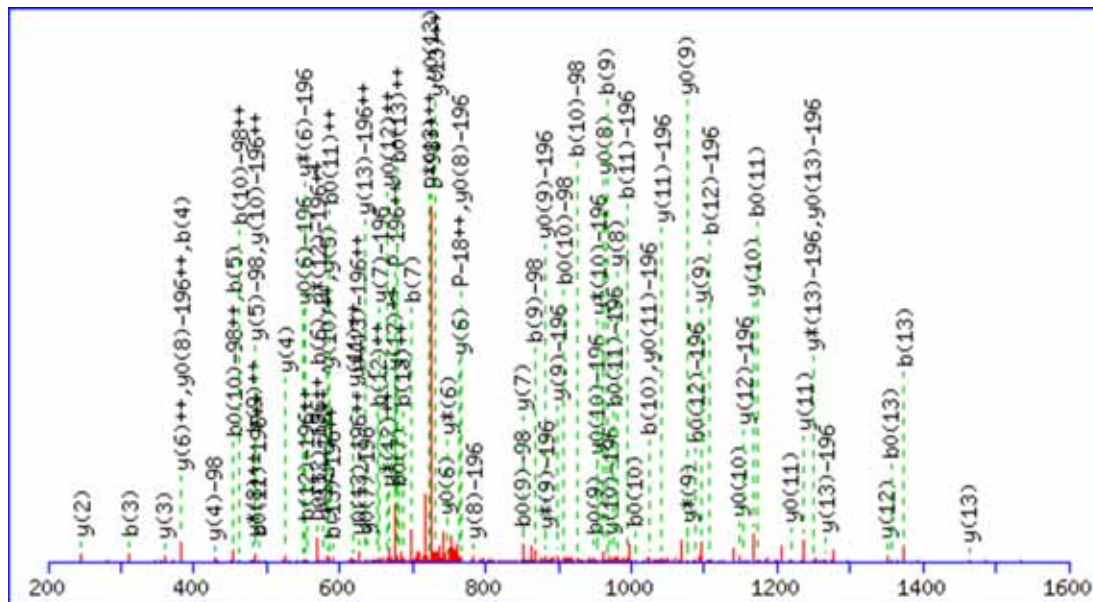

**Monoisotopic mass of neutral peptide Mr(calc):** 1547.6885

**Fixed modifications:** Carbamidomethyl (C) (apply to specified residues or termini only)

**Variable modifications:**

**N-term :** Dimethyl (N-term)

**T9 :** Phospho (ST), with neutral losses 0.0000(shown in table), 97.9769

**S11 :** Phospho (ST), with neutral losses 0.0000(shown in table), 97.9769

**K14 :** Dimethyl (K)

**Ions Score:** 65 **Expect:** 1.1e-005

**Matched b ions:** b(3), b(4), b(5), b(6), b(7), b(9)-98, b(9)++, b(9), b(10), b(10)-98++, b(10)-98, b(11)-98, b(11)-196, b(12)-98, b(12)-196, b(12)-196++, b(12)++, b(13)-98, b(13), b(13)-196++, b(13)++

**Matched y ions:** y(2), y(3), y(4)-98, y(4), y(5)-98, y(5), y(6)++, y(6), y(6)-98, y(7)-98, y(7), y(7)-196, y(8), y(8)-98, y(8)-196, y(9)-98, y(9), y(9)-196, y(9)-98++, y(10)-98, y(10), y(10)-196++, y(10)++, y(10)-196, y(11), y(11)-98, y(11)-196, y(11)-98++, y(11)++, y(12)-98++, y(12)-98, y(12), y(12)-196++, y(12)++, y(12)-196, y(13), y(13)-98, y(13)-196, y(13)-196++, y(13)-98++, y(13)++

**Precursor origin neutral loss:** +

## Peptide No.302

**GILAADESTGSIK**

**Confirmed sites:** @S:11

**Ambiguous sites:**

MS/MS Fragmentation of **GILAADESTGSIK**

Found in **ALDOA\_MOUSE**, Fructose-bisphosphate aldolase A OS=Mus musculus GN=Aldoa PE=1 SV=2

Match to Query 2025: 1479.786292 from(740.900422,2+)

Title: Elution from: 38.630 to 38.630 scan no 3290 cid35.00 polarity:+:MA10





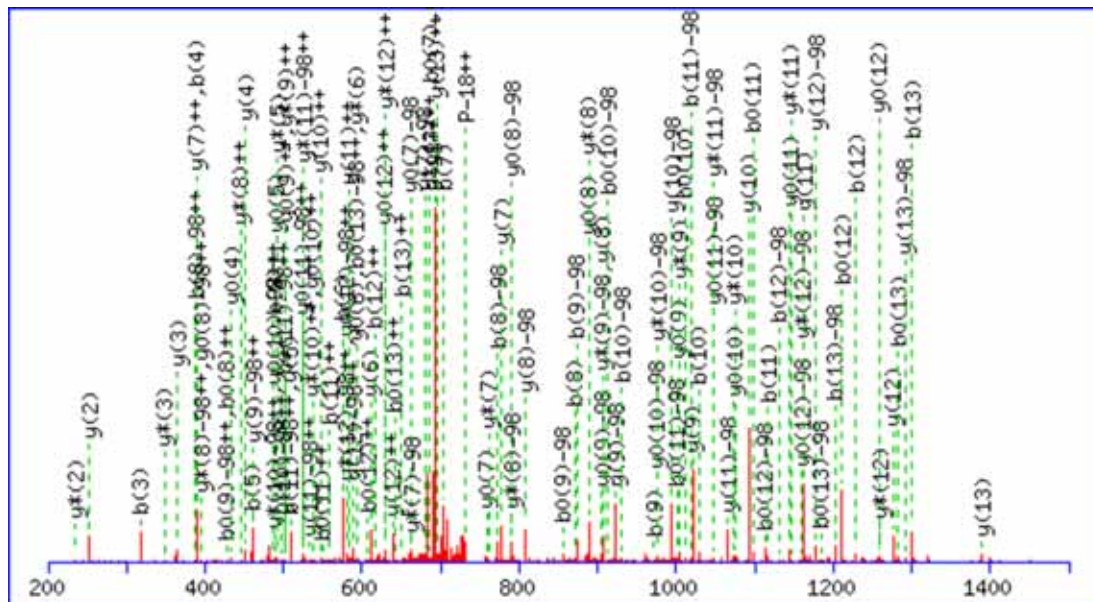

**Monoisotopic mass of neutral peptide Mr(calc):** 1479.7858

**Fixed modifications:** Carbamidomethyl (C) (apply to specified residues or termini only)

**Variable modifications:**

**N-term :** Dimethyl:2H(4)13C(2) (N-term)

**S8 :** Phospho (ST), with neutral losses 0.0000(shown in table), 97.9769

**K14 :** Dimethyl:2H(4)13C(2) (K)

**Ions Score:** 90 **Expect:** 4.8e-008

**Matched b ions:** b(3), b(4), b(5), b(6), b(7), b(8)-98, b(8)-98++, b(8), b(9)-98, b(9)++, b(9), b(10), b(10)-98, b(11)-98++, b(11), b(11)++, b(11)-98, b(12), b(12)++, b(12)-98, b(13), b(13)-98, b(13)++

**Matched y ions:** y(2), y(3), y(4), y(5), y(6), y(7)++, y(7), y(7)-98, y(8)-98, y(8), y(9)-98, y(9), y(9)-98++, y(10), y(10)-98, y(10)-98++, y(10)++, y(11), y(11)-98, y(11)-98++, y(11)++, y(12), y(12)-98++, y(12)-98, y(12)++, y(13), y(13)-98, y(13)++

**Precursor origin neutral loss:** +

## Peptide No.304

**GILAADESTGSIK**

**Confirmed sites:** @S:8,@T:9

**Ambiguous sites:**

**MS/MS Fragmentation of** **GILAADESTGSIK**

Found in **ALDOA\_MOUSE**, Fructose-bisphosphate aldolase A OS=Mus musculus GN=Aldoa PE=1 SV=2

Match to Query 2193: 1559.752824 from(780.883688,2+)

Title: Elution from: 43.581 to 43.581 scan no 3927 cid35.00 polarity:+:MA10:m1s

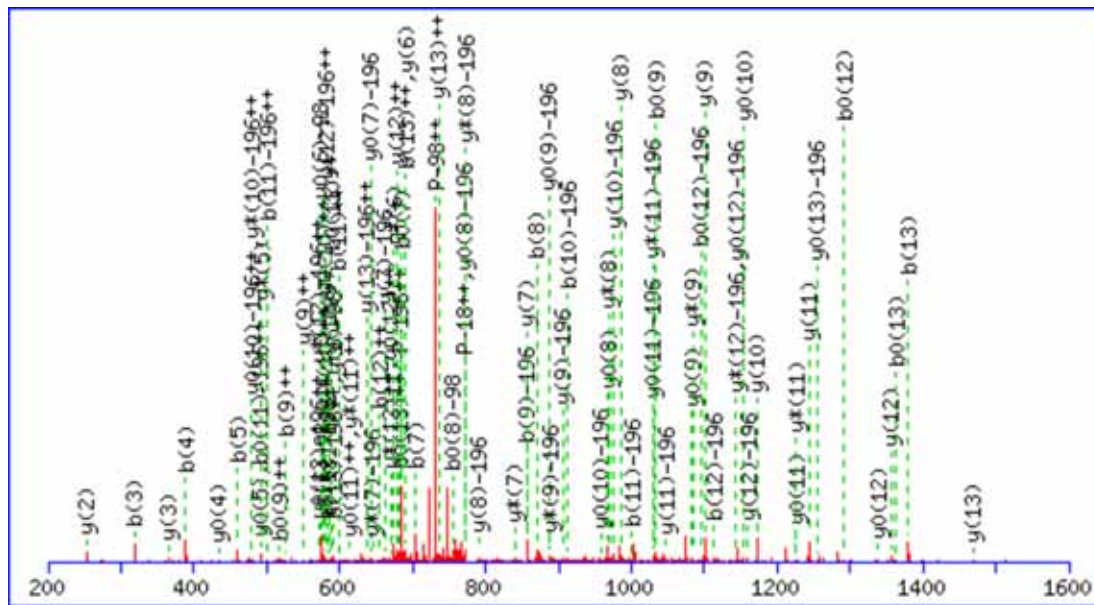

**Monoisotopic mass of neutral peptide Mr(calc): 1559.7521**

**Fixed modifications:** Carbamidomethyl (C) (apply to specified residues or termini only)

**Variable modifications:**

**N-term :** Dimethyl:2H(4)13C(2) (N-term)

**S8 :** Phospho (ST), with neutral losses 0.0000(shown in table), 97.9769

**T9 :** Phospho (ST), with neutral losses 0.0000(shown in table), 97.9769

**K14 :** Dimethyl:2H(4)13C(2) (K)

**Ions Score: 33 Expect: 0.023**

**Matched b ions:** b(3), b(4), b(5), b(6), b(7), b(8)-98, b(8), b(9)++, b(9)-196, b(10)-196, b(10)-98, b(11)-98, b(11)-196++, b(11)-98++, b(11)++, b(11)-196, b(12)-98, b(12)-196, b(12)++, b(13)-98, b(13), b(13)-196++, b(13)-98++, b(13)++

**Matched y ions:** y(2), y(3), y(6)-98, y(6), y(7)-98, y(7), y(7)-98++, y(7)-196, y(8)-98, y(8), y(8)-196, y(9)-98, y(9), y(9)-196, y(9)++, y(10)-98, y(10), y(10)-196, y(10)-98++, y(10)++, y(11), y(11)-98, y(11)-98++, y(11)-196, y(12)-98++, y(12)-98, y(12), y(12)-196++, y(12)-196, y(12)++, y(13), y(13)-196++, y(13)-98++, y(13)++

**Precursor origin neutral loss: +**

## Peptide No.305

**GILAADESTGSIK**

**Confirmed sites: @T:9,@S:11**

**Ambiguous sites:**

MS/MS Fragmentation of **GILAADESTGSIK**

Found in **ALDOA\_MOUSE**, Fructose-bisphosphate aldolase A OS=Mus musculus GN=Aldoa PE=1 SV=2

Match to Query 1906: 1559.752640 from(780.883596,2+)

Title: Elution from: 43.589 to 43.589 scan no 3820 cid35.00 polarity:+:MA10



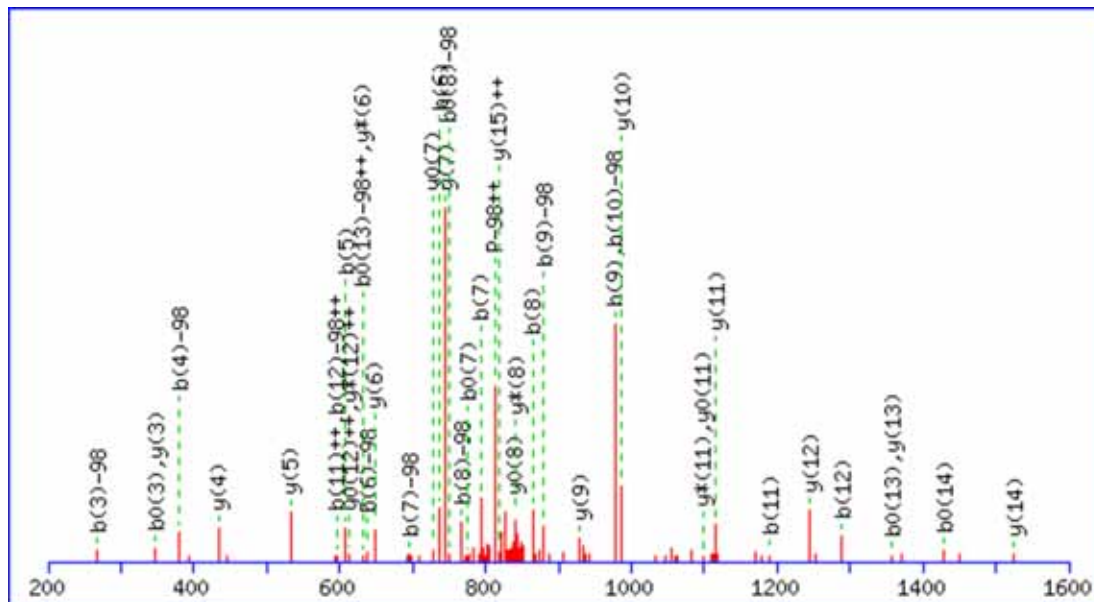

**Monoisotopic mass of neutral peptide Mr(calc):** 1721.8237

**Fixed modifications:** Carbamidomethyl (C) (apply to specified residues or termini only)

**Variable modifications:**

**N-term :** Dimethyl (N-term)

**S3 :** Phospho (ST), with neutral losses 0.0000(shown in table), 97.9769

**Ions Score:** 91 **Expect:** 4e-008

**Matched b ions:** b(3)-98, b(4)-98, b(5), b(6), b(6)-98, b(7), b(7)-98, b(8)-98, b(8), b(9)-98, b(9), b(10)-98, b(11), b(11)++, b(12), b(12)-98++

**Matched y ions:** y(3), y(4), y(5), y(6), y(7), y(9), y(10), y(11), y(12), y(13), y(14), y(15)++

**Precursor origin neutral loss:** +

## Peptide No.307

**GISLEEGALPDVSATR**

**Confirmed sites:** @S:3

**Ambiguous sites:**

MS/MS Fragmentation of **GISLEEGALPDVSATR**

Found in **XIRP1\_MOUSE**, Xin actin-binding repeat-containing protein 1 OS=Mus musculus GN=Xirp1 PE=1 SV=2

Match to Query 3345: 1727.855720 from(864.935136,2+)

Title: Elution from: 54.229 to 54.229 scan no 5199 cid35.00 polarity:+:MA10





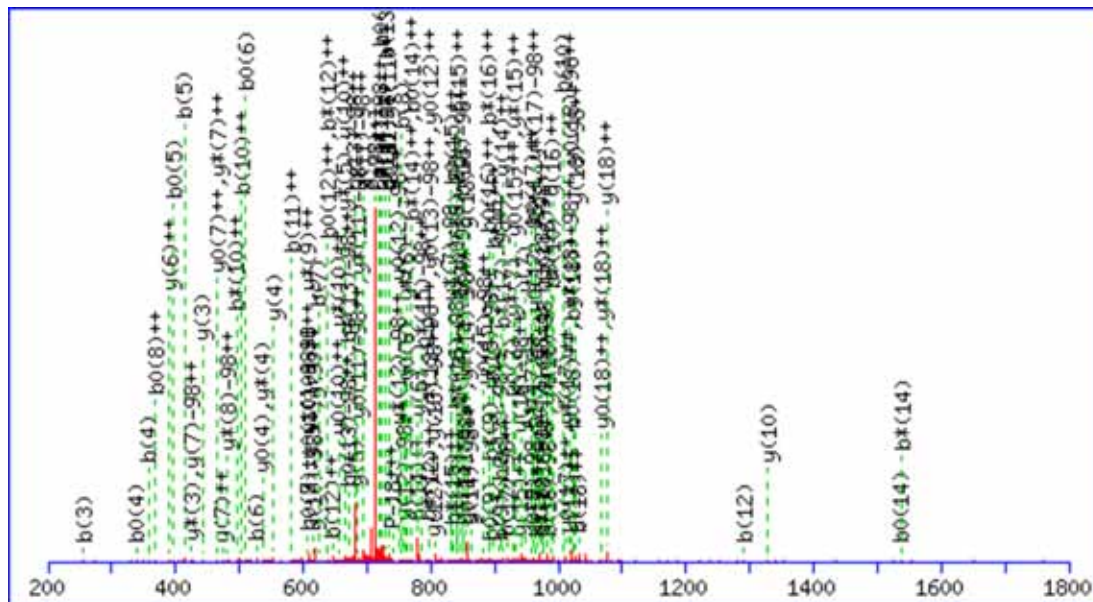

**Monoisotopic mass of neutral peptide Mr(calc):** 2236.1113

**Fixed modifications:** Carbamidomethyl (C) (apply to specified residues or termini only)

**Variable modifications:**

**N-term :** Dimethyl (N-term)

**S13 :** Phospho (ST), with neutral losses 0.0000(shown in table), 97.9769

**Ions Score:** 35 **Expect:** 0.024

**Matched b ions:** b(3), b(4), b(5), b(6), b(7), b(8), b(9), b(10)++, b(10), b(11)++, b(12)++, b(12), b(13)-98++, b(13)++, b(14)-98++, b(14)++, b(15)++, b(16)-98++, b(16)++, b(17)-98++, b(17)++, b(18)-98++, b(18)++

**Matched y ions:** y(3), y(4), y(5), y(6), y(6)++, y(7), y(7)-98++, y(7)++, y(7)-98, y(8)-98, y(9)++, y(10), y(10)-98++, y(10)++, y(11)-98++, y(12)++, y(12)-98++, y(13)++, y(13)-98++, y(14)++, y(14)-98++, y(15)++, y(15)-98++, y(16)-98++, y(16)++, y(17)++, y(17)-98++, y(18)++, y(18)-98++

**Precursor origin neutral loss:** +

## Peptide No.309

**GNKSPSPPPDGSPAATPEIR**

**Confirmed sites:** @S:4,@S:12

**Ambiguous sites:**

**MS/MS Fragmentation of GNKSPSPPPDGSPAATPEIR**

Found in **BIN1\_MOUSE**, Myc box-dependent-interacting protein 1 OS=Mus musculus GN=Bin1 PE=1 SV=1

Match to Query 5891: 2189.977566 from(730.999798,3+)

Title: Elution from: 31.969 to 31.969 scan no 2404 cid35.00 polarity:+:MA10:m1s

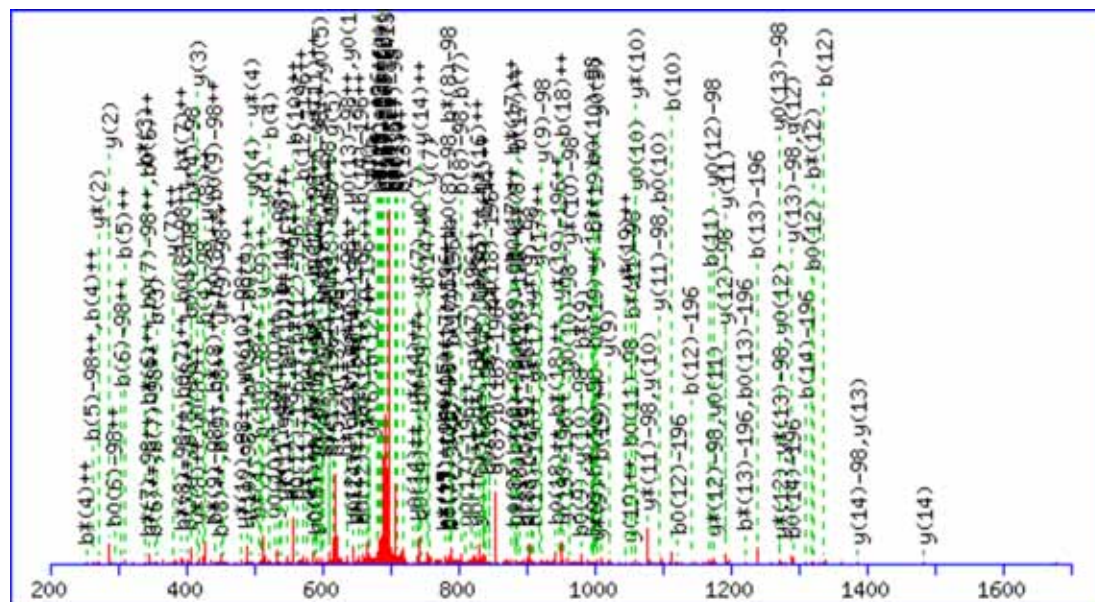

**Monoisotopic mass of neutral peptide Mr(calc): 2189.9759**

**Fixed modifications:** Carbamidomethyl (C) (apply to specified residues or termini only)

**Variable modifications:**

**N-term :** Dimethyl (N-term)

**K3 :** Dimethyl (K)

**S4 :** Phospho (ST), with neutral losses 0.0000(shown in table), 97.9769

**S12 :** Phospho (ST), with neutral losses 0.0000(shown in table), 97.9769

**Ions Score:** 67 **Expect:** 1.2e-005

**Matched b ions:** b(3), b(4)-98, b(4)++, b(4), b(5), b(5)++, b(5)-98++, b(6), b(6)-98++, b(6)-98, b(6)++, b(7), b(7)-98, b(7)++, b(7)-98++, b(8)++, b(8)-98, b(8)-98++, b(8), b(9)-98++, b(9), b(10)++, b(10), b(10)-98++, b(11)++, b(11)-98++, b(12)-98++, b(12)-98, b(12), b(12)-196++, b(12)++, b(12)-196, b(13)-196++, b(13)-196, b(13)-98++, b(13)++, b(14)-196, b(14)-196++, b(14)-98++, b(14)++, b(15)++, b(15)-196++, b(15)-98++, b(16)++, b(16)-98++, b(17)-98++, b(17)-196++, b(17)++, b(18)-196++, b(18)++, b(18)-98++, b(19)++, b(19)-98++, b(19)-196++

**Matched y ions:** y(2), y(3), y(4), y(5), y(6), y(7), y(7)++, y(8)++, y(8), y(9), y(9)++, y(9)-98, y(10)-98, y(10), y(10)-98++, y(10)++, y(11), y(11)-98++, y(11)-98, y(11)++, y(12), y(12)-98, y(12)++, y(12)-98++, y(13)-98, y(13), y(13)++, y(13)-98++, y(14), y(14)-98, y(14)-98++, y(14)++, y(15)++, y(16)++, y(16)-98++, y(17)-196++, y(17)-98++, y(17)++, y(18)-98++, y(18)++, y(19)-196++, y(19)-98++, y(19)++

**Precursor origin neutral loss:** +

## Peptide No.310

**GNKSPSPPPDGSPAATPEIR**

**Confirmed sites:** @S:4,@S:6,@S:12

**Ambiguous sites:**

MS/MS Fragmentation of **GNKSPSPPPDGSPAATPEIR**

Found in **BIN1\_MOUSE**, Myc box-dependent-interacting protein 1 OS=Mus musculus GN=Bin1 PE=1 SV=1

Match to Query 5522: 2269.943355 from(757.655061,3+)



Title: Elution from: 34.160 to 34.160 scan no 2562 cid35.00 polarity:+:MA10:m1s

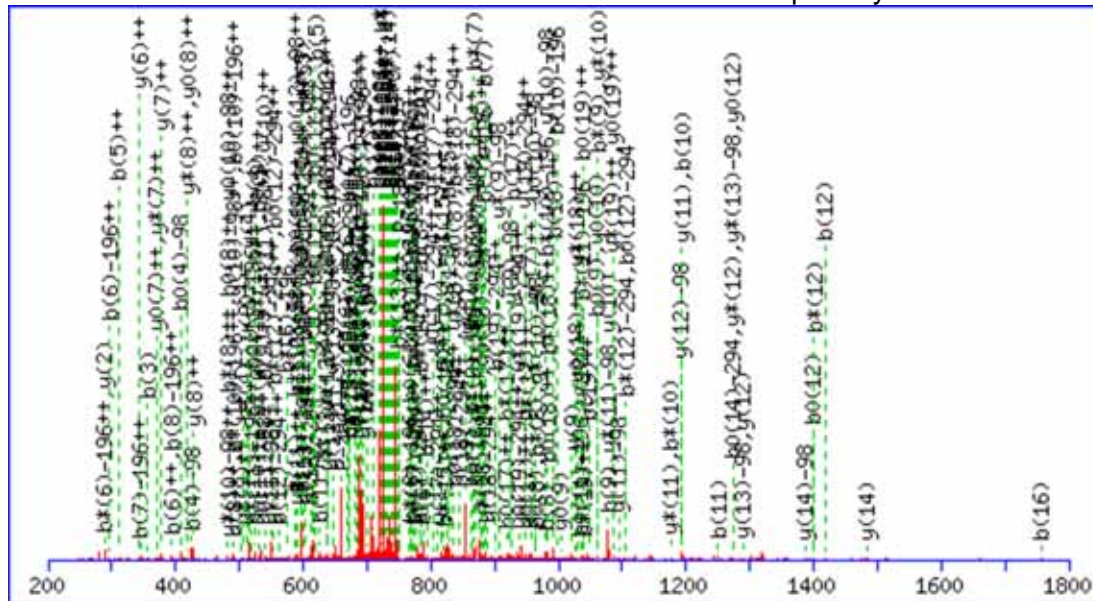

**Monoisotopic mass of neutral peptide Mr(calc):** 2269.9422

**Fixed modifications:** Carbamidomethyl (C) (apply to specified residues or termini only)

**Variable modifications:**

**N-term :** Dimethyl (N-term)

**K3 :** Dimethyl (K)

**S4 :** Phospho (ST), with neutral losses 0.0000(shown in table), 97.9769

**S6 :** Phospho (ST), with neutral losses 0.0000(shown in table), 97.9769

**S12 :** Phospho (ST), with neutral losses 0.0000(shown in table), 97.9769

**Ions Score:** 38 **Expect:** 0.0074

**Matched b ions:** b(3), b(4)-98, b(4), b(5)++, b(5), b(6), b(6)-98++, b(6)-98, b(6)++, b(6)-196, b(6)-196++, b(7)-98, b(7)-196++, b(7)-98++, b(7), b(7)-196, b(8)++, b(8), b(8)-196++, b(8)-196, b(8)-98, b(9), b(9)-98, b(9)-98++, b(9)++, b(9)-196, b(10)++, b(10), b(10)-98++, b(10)-196, b(10)-98, b(11), b(11)++, b(11)-98++, b(12)-98, b(12), b(12)-196++, b(12)-98++, b(12)-196, b(12)-294++, b(12)++, b(13)-294++, b(13)-196++, b(13)-98++, b(14)-294++, b(14)-196++, b(14)-98++, b(14)++, b(15)++, b(15)-98++, b(15)-294++, b(15)-196++, b(16), b(16)-294++, b(16)-196++, b(16)-98++, b(16)++, b(17)-98, b(17)-196++, b(17)-294++, b(17)-98++, b(17)++, b(18)++, b(18)-98++, b(18)-294++, b(18)-196++, b(19)-294++, b(19)-196++, b(19)++

**Matched y ions:** y(2), y(4), y(5), y(6), y(6)++, y(7)++, y(8), y(8)++, y(9), y(9)++, y(9)-98, y(10), y(10)-98, y(10)-98++, y(10)++, y(11)++, y(11), y(11)-98++, y(11)-98, y(12)-98++, y(12)-98, y(12), y(12)++, y(13)++, y(13)-98, y(13)-98++, y(14)++, y(14), y(14)-98++, y(14)-98, y(15)++, y(15)-196++, y(15)-98++, y(16)-98++, y(16)++, y(16)-196++, y(17)++, y(17)-294++, y(17)-196++, y(17)-98++, y(18)-294++, y(18)-196++, y(18)-98++, y(18)++, y(19)-294++, y(19)-196++, y(19)-98++

**Precursor origin neutral loss:** +

## Peptide No.311

**GNKSPSPPPDGSPAATPEIR**

**Confirmed sites:** @S:4,@S:6,@T:16

**Ambiguous sites:**



MS/MS Fragmentation of **GNKSPSPPPDGSPAATPEIR**

Found in **BIN1\_MOUSE**, Myc box-dependent-interacting protein 1 OS=Mus musculus GN=Bin1 PE=1 SV=1

Match to Query 6036: 2269.944681 from(757.655503,3+)

Title: Elution from: 34.168 to 34.168 scan no 2672 cid35.00 polarity:+:MA10:m1s

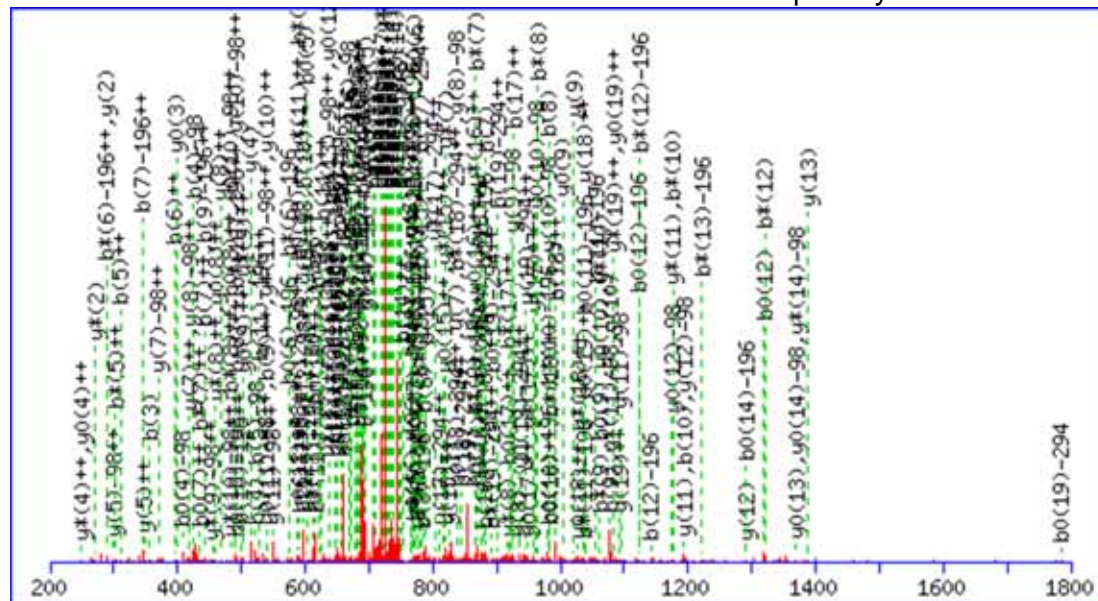

**Monoisotopic mass of neutral peptide Mr(calc):** 2269.9422

**Fixed modifications:** Carbamidomethyl (C) (apply to specified residues or termini only)

**Variable modifications:**

**N-term :** Dimethyl (N-term)

**K3 :** Dimethyl (K)

**S4 :** Phospho (ST), with neutral losses 0.0000(shown in table), 97.9769

**S6 :** Phospho (ST), with neutral losses 0.0000(shown in table), 97.9769

**T16 :** Phospho (ST), with neutral losses 0.0000(shown in table), 97.9769

**Ions Score:** 31 **Expect:** 0.035

**Matched b ions:** b(3), b(4)-98, b(4), b(5)-98, b(5)++, b(5), b(6)-98++, b(6), b(6)-98, b(6)-196, b(6)++, b(7)-196++, b(7)-98, b(7), b(7)++, b(7)-196, b(8)++, b(8)-98, b(8)-98++, b(8)-196, b(8), b(9), b(9)-98, b(9)-98++, b(9)-196++, b(9)++, b(9)-196, b(10)++, b(10), b(10)-98++, b(10)-196++, b(10)-98, b(11)-196++, b(11)-98++, b(11)++, b(11)-196, b(12)-196, b(12)-98++, b(12)++, b(13)-98++, b(13)++, b(14)-196++, b(14)-98++, b(14)++, b(15)-196++, b(15)-98++, b(15)++, b(16)-294++, b(16)-196++, b(16)-98++, b(16)++, b(17)-294++, b(17)-196++, b(17)-98++, b(17)++, b(18)++, b(18)-98++, b(18)-294++, b(18)-196++, b(19)-294++, b(19)-196++, b(19)-98++

**Matched y ions:** y(2), y(4), y(5)-98, y(5)++, y(5), y(5)-98++, y(6)-98, y(6), y(7)-98++, y(7)++, y(7)-98, y(7), y(8)-98++, y(8), y(8)++, y(8)-98, y(9)-98, y(9), y(10), y(10)-98, y(10)-98++, y(10)++, y(11)++, y(11), y(11)-98++, y(11)-98, y(12)-98++, y(12)-98, y(12)++, y(12), y(13), y(13)-98++, y(13)++, y(14)++, y(14)-98++, y(15)++, y(15)-196++, y(16)++, y(16)-98++, y(16)-196++, y(17)++, y(17)-294++, y(17)-98++, y(18)++, y(18)-98++, y(19)-294++, y(19)-98++, y(19)++

**Precursor origin neutral loss:** +

**Peptide No.312**

# GNKSPSPPPDGSPAATPEIR

Confirmed sites: @S:4,@S:12

Ambiguous sites:

## MS/MS Fragmentation of GNKSPSPPPDGSPAATPEIR

Found in **BIN1\_MOUSE**, Myc box-dependent-interacting protein 1 OS=Mus musculus GN=Bin1 PE=1 SV=1

Match to Query 5729: 2202.040914 from(735.020914,3+)

Title: Elution from: 31.428 to 31.428 scan no 2300 cid35.00 polarity:+:MA10:m1s

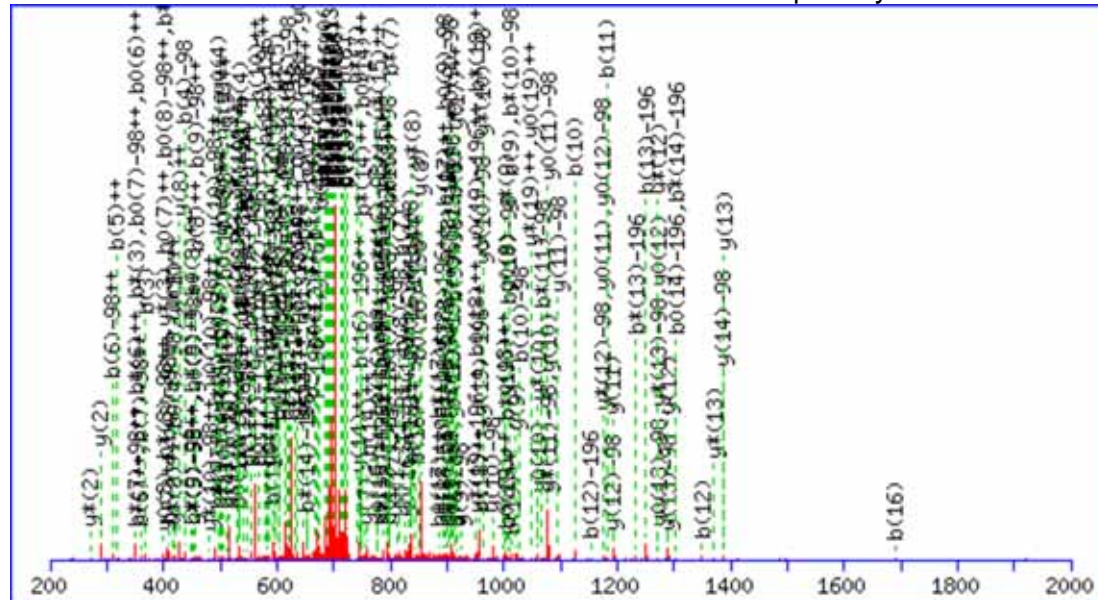

**Monoisotopic mass of neutral peptide Mr(calc): 2202.0395**

**Fixed modifications:** Carbamidomethyl (C) (apply to specified residues or termini only)

**Variable modifications:**

**N-term :** Dimethyl:2H(4)13C(2) (N-term)

**K3 :** Dimethyl:2H(4)13C(2) (K)

**S4 :** Phospho (ST), with neutral losses 0.0000(shown in table), 97.9769

**S12 :** Phospho (ST), with neutral losses 0.0000(shown in table), 97.9769

**Ions Score: 58 Expect: 0.00012**

**Matched b ions:** b(3), b(4)-98, b(4), b(5)-98, b(5)++, b(5), b(6)-98++, b(6), b(6)-98, b(6)++, b(7)++, b(7), b(7)-98++, b(7)-98, b(8)-98++, b(8)++, b(8)-98, b(8), b(9)-98++, b(9)++, b(9)-98, b(9), b(10)-98++, b(10)++, b(10), b(10)-98, b(11)++, b(11), b(12)-98++, b(12)-98, b(12), b(12)-196++, b(12)++, b(12)-196, b(13)-196++, b(13)-196, b(13)-98++, b(13)++, b(14)++, b(14)-98++, b(15)-196++, b(15)-98++, b(15)++, b(16), b(16)-196++, b(16)-98++, b(16)++, b(17)-98, b(17)++, b(17)-196++, b(17)-98++, b(18)++, b(18)-98++, b(19)++, b(19)-98++

**Matched y ions:** y(2), y(3), y(4), y(5), y(6), y(7), y(8)++, y(8), y(9), y(9)++, y(9)-98, y(10), y(10)-98, y(10)-98++, y(10)++, y(11), y(11)++, y(11)-98, y(11)-98++, y(12)-98, y(12), y(12)-98++, y(12)++, y(13), y(13)-98, y(13)++, y(13)-98++, y(14)-98, y(14)-98++, y(14)++, y(15)++, y(16)++, y(16)-98++, y(17)-98++, y(17)++, y(18)-98++, y(18)-196++, y(18)++, y(19)-196++

**Precursor origin neutral loss: +**

## Peptide No.313





# GNKSPSPPPDGSPAATPEIR

Confirmed sites: @S:6,@S:12

Ambiguous sites:

## MS/MS Fragmentation of GNKSPSPPPDGSPAATPEIR

Found in **BIN1\_MOUSE**, Myc box-dependent-interacting protein 1 OS=Mus musculus GN=Bin1 PE=1 SV=1

Match to Query 5808: 2202.040584 from(735.020804,3+)

Title: Elution from: 32.127 to 32.127 scan no 2389 cid35.00 polarity:+:MA10:m1s

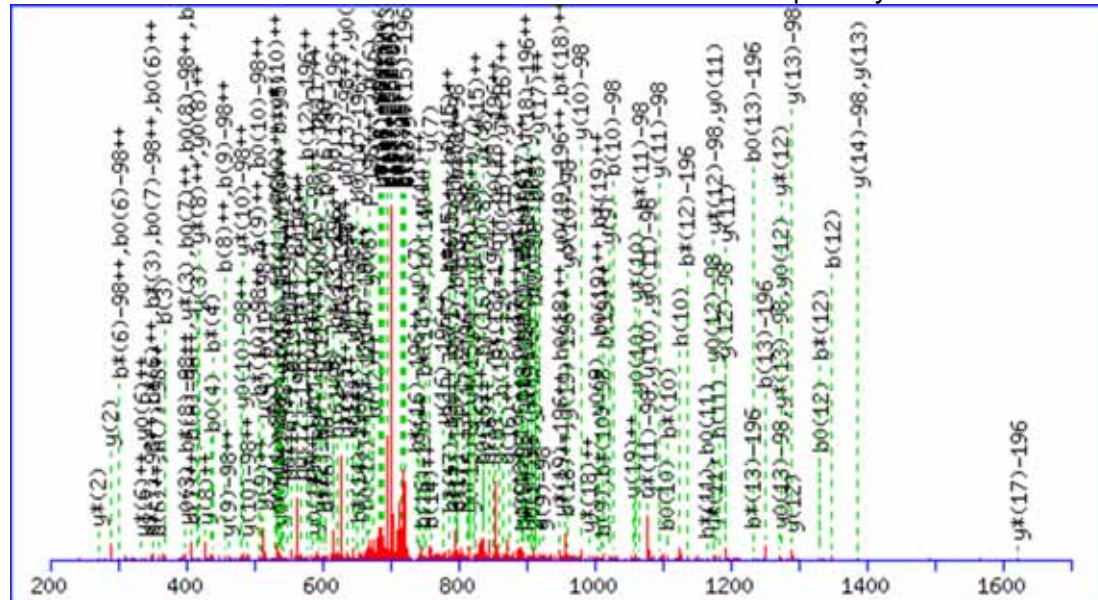

**Monoisotopic mass of neutral peptide Mr(calc): 2202.0395**

**Fixed modifications:** Carbamidomethyl (C) (apply to specified residues or termini only)

**Variable modifications:**

**N-term :** Dimethyl:2H(4)13C(2) (N-term)

**K3 :** Dimethyl:2H(4)13C(2) (K)

**S6 :** Phospho (ST), with neutral losses 0.0000(shown in table), 97.9769

**S12 :** Phospho (ST), with neutral losses 0.0000(shown in table), 97.9769

**Ions Score: 50 Expect: 0.00076**

**Matched b ions:** b(3), b(6), b(6)-98, b(6)++, b(7)++, b(7), b(7)-98++, b(7)-98, b(8)-98++, b(8)++, b(8)-98, b(8), b(9)-98++, b(9)++, b(9)-98, b(9), b(10)-98++, b(10)++, b(10), b(10)-98, b(11), b(11)++, b(11)-98++, b(12)-98++, b(12)-98, b(12), b(12)-196++, b(12)++, b(13)-196++, b(13)-98, b(13)-196, b(13)++, b(13)-98++, b(14)++, b(14)-196++, b(14)-98++, b(15)++, b(15)-196++, b(15)-98++, b(16)++, b(16)-196++, b(16)-98++, b(17)-98++, b(17)++, b(17)-196++, b(18)++, b(18)-98++, b(18)-196++, b(19)++, b(19)-98++

**Matched y ions:** y(2), y(3), y(4), y(5), y(6), y(7), y(8), y(8)++, y(9)-98++, y(9)++, y(9)-98, y(9), y(10), y(10)-98, y(10)-98++, y(10)++, y(11), y(11)-98++, y(11)++, y(11)-98, y(12)-98, y(12), y(12)-98++, y(12)++, y(13), y(13)++, y(13)-98, y(13)-98++, y(14)-98, y(14)-98++, y(14)++, y(15)-98++, y(15)++, y(16)-196++, y(16)-98++, y(16)++, y(17)-196++, y(17)-98++, y(17)++, y(18)-98++, y(18)-196++, y(19)-196++, y(19)++

**Precursor origin neutral loss: +**

## Peptide No.315



# GPAPSLPGAPPDEVYLSLSDSPAEPAPVK

Confirmed sites: @S:18

Ambiguous sites:

MS/MS Fragmentation of **GPAPSLPGAPPDEVYLSLSDSPAEPAPVK**

Found in **SYP2L\_MOUSE**, Synaptopodin 2-like protein OS=Mus musculus GN=Synpo2l PE=2 SV=1

Match to Query 7491: 2949.455871 from(984.159233,3+)

Title: Elution from: 48.838 to 48.838 scan no 4613 cid35.00 polarity:+:MA10:m1s

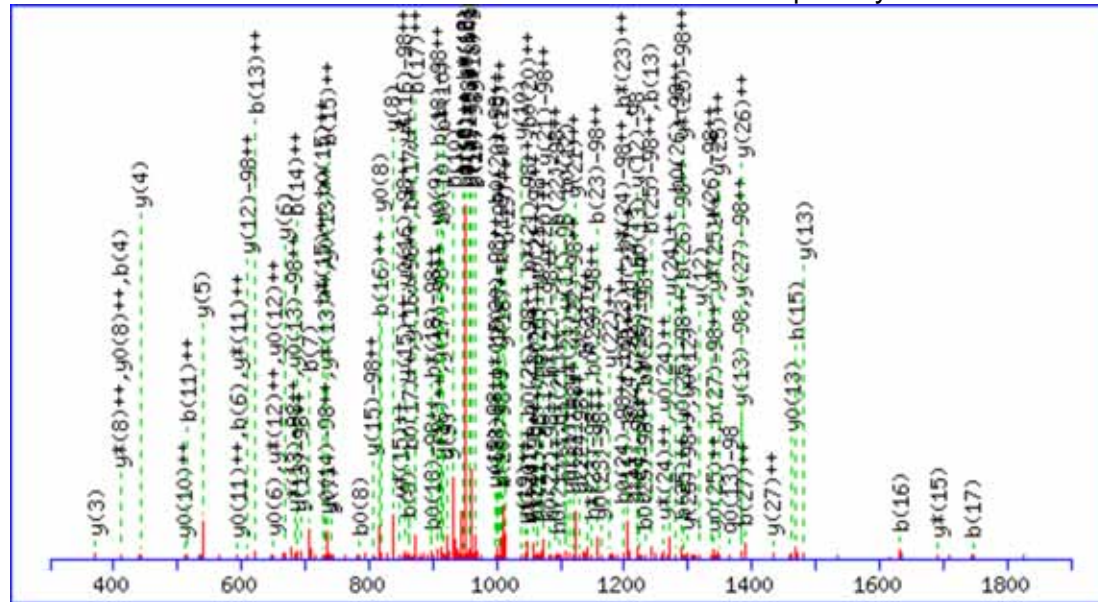

**Monoisotopic mass of neutral peptide Mr(calc):** 2949.4525

**Fixed modifications:** Carbamidomethyl (C) (apply to specified residues or termini only)

**Variable modifications:**

**N-term :** Dimethyl (N-term)

**S18 :** Phospho (ST), with neutral losses 97.9769(shown in table), 0.0000

**K28 :** Dimethyl (K)

**Ions Score:** 89 **Expect:** 1.3e-007

**Matched b ions:** b(4), b(6), b(7), b(9), b(10), b(11)++, b(13)++, b(13), b(14)++, b(15)++, b(15), b(16), b(16)++, b(17), b(17)++, b(18)-98++, b(18)++, b(19)++, b(19)-98++, b(20)-98++, b(20)++, b(21)-98++, b(22)++, b(22)-98++, b(23)++, b(23)-98++, b(24)-98++, b(25)++, b(25)-98++, b(26)-98++, b(27)++, b(27)-98++

**Matched y ions:** y(3), y(4), y(5), y(6), y(7), y(8), y(9), y(10), y(11), y(11)-98, y(12)-98++, y(12)-98, y(12), y(13), y(13)-98, y(13)-98++, y(15)++, y(15)-98++, y(16)-98++, y(16)++, y(17)++, y(17)-98++, y(18)++, y(18)-98++, y(19)++, y(19)-98++, y(20)++, y(21)++, y(21)-98++, y(22)-98++, y(22)++, y(23)++, y(24)++, y(24)-98++, y(25)-98++, y(25)++, y(26)++, y(26)-98++, y(27)-98++, y(27)++

**Precursor origin neutral loss:** +

## Peptide No.316

GPAPSLPGAPPDEVYLSLSDSPAEPAPVK

Confirmed sites: @S:18,@S:20

Ambiguous sites:

MS/MS Fragmentation of **GPAPSLPGAPPDEVYLS DSPAEPAPVK**

Found in **SYP2L\_MOUSE**, Synaptopodin 2-like protein OS=Mus musculus GN=Synpo2l PE=2 SV=1

Match to Query 6685: 3029.421684 from(1010.814504,3+)

Title: Elution from: 50.772 to 50.772 scan no 4625 cid35.00 polarity:+:MA10:m1s

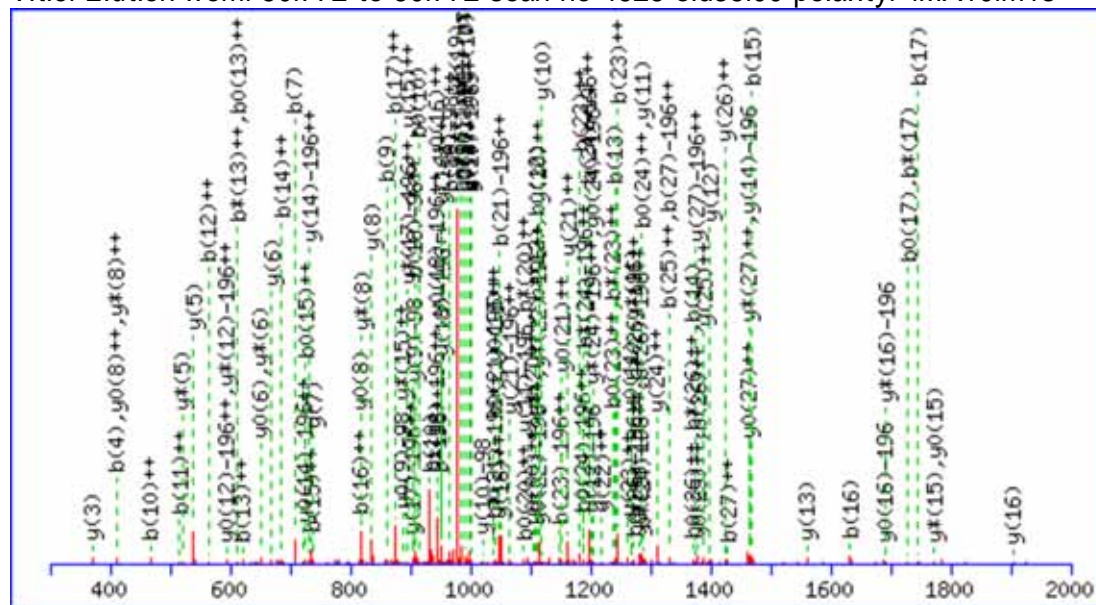

**Monoisotopic mass of neutral peptide Mr(calc): 3029.4188**

**Fixed modifications:** Carbamidomethyl (C) (apply to specified residues or termini only)

**Variable modifications:**

**N-term :** Dimethyl (N-term)

**S18 :** Phospho (ST), with neutral losses 97.9769(shown in table), 0.0000

**S20 :** Phospho (ST), with neutral losses 97.9769(shown in table), 0.0000

**K28 :** Dimethyl (K)

**Ions Score:** 84 **Expect:** 4.3e-007

**Matched b ions:** b(4), b(7), b(9), b(10), b(10)++, b(11)++, b(12)++, b(13)++, b(13), b(14)++, b(14), b(15)++, b(15), b(16)++, b(16), b(17)++, b(17), b(18)-98++, b(19)-98++, b(20)-98++, b(20)-196++, b(21)-196++, b(21)-98++, b(22)++, b(22)-98++, b(23)-98++, b(23)++, b(23)-196++, b(24)-196++, b(24)-98++, b(25)-98++, b(25)++, b(26)++, b(26)-196++, b(26)-98++, b(27)-98++, b(27)-196++, b(27)++

**Matched y ions:** y(3), y(5), y(6), y(7), y(8), y(9)-98, y(10)-98, y(10), y(11), y(11)-98, y(11)-196, y(12)-98++, y(12), y(12)-98, y(12)-196, y(13), y(13)-98++, y(13)-98, y(14)-196++, y(14)-98++, y(14)-196, y(15)-98, y(15)++, y(16), y(16)++, y(16)-98++, y(17)-98++, y(17)-196++, y(17)++, y(18)++, y(18)-196++, y(18)-98++, y(20)++, y(20)-98++, y(21)-98++, y(21)++, y(21)-196++, y(22)-98++, y(22)++, y(23)++, y(24)++, y(24)-98++, y(25)++, y(25)-98++, y(26)-98++, y(26)++, y(27)-196++, y(27)-98++

**Precursor origin neutral loss:** +

**Peptide No.317**

**GPAPSLPGAPPDEVYLS DSPAEPAPVK**

**Confirmed sites:** @S:6,@S:18

**Ambiguous sites:**

MS/MS Fragmentation of **GPAPSLPGAPPDEVYLS DSPAEPAPVK**

Found in **SYP2L\_MOUSE**, Synaptopodin 2-like protein OS=Mus musculus GN=Synpo2l PE=2 SV=1

Match to Query 7407: 3029.420025 from(1010.813951,3+)

Title: Elution from: 51.455 to 51.455 scan no 4896 cid35.00 polarity+:MA10:m1s

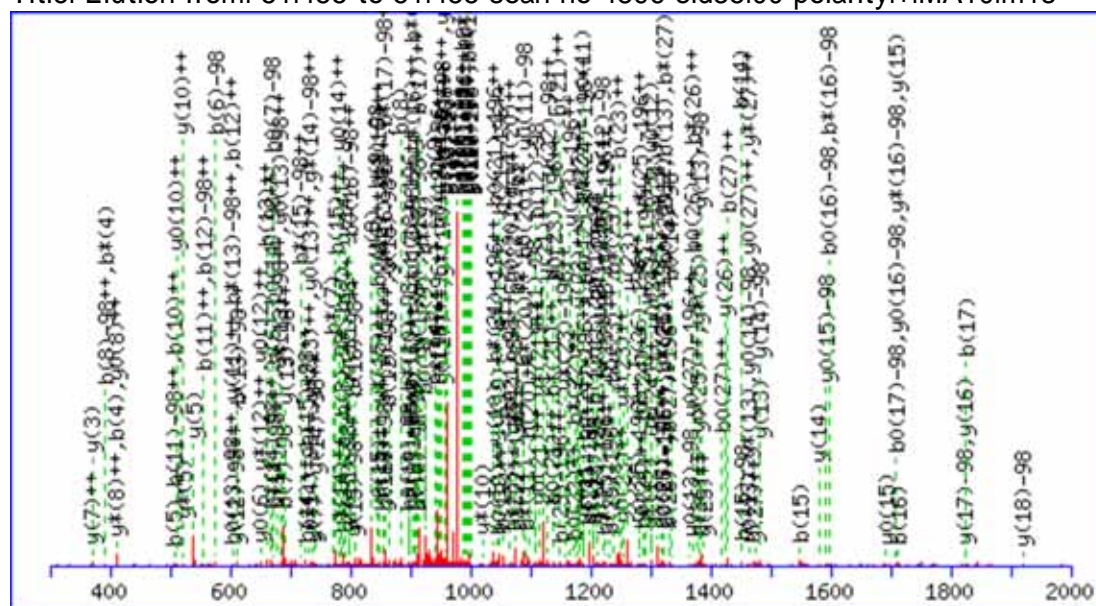

**Monoisotopic mass of neutral peptide Mr(calc): 3029.4188**

**Fixed modifications:** Carbamidomethyl (C) (apply to specified residues or termini only)

**Variable modifications:**

**N-term :** Dimethyl (N-term)

**S6 :** Phospho (ST), with neutral losses 0.0000(shown in table), 97.9769

**S18 :** Phospho (ST), with neutral losses 0.0000(shown in table), 97.9769

**K28 :** Dimethyl (K)

**Ions Score: 56 Expect: 0.00029**

**Matched b ions:** b(4), b(5), b(6)-98, b(7)-98, b(7), b(8)-98++, b(8)-98, b(8), b(9)-98, b(9), b(10)++, b(10)-98, b(11)-98++, b(11)++, b(12)-98++, b(12), b(12)++, b(12)-98, b(13)++, b(13), b(13)-98, b(13)-98++, b(14)++, b(14), b(14)-98++, b(15)++, b(15), b(15)-98++, b(15)-98, b(16), b(16)++, b(16)-98++, b(17), b(17)-98++, b(17)++, b(18)-196++, b(18)-98++, b(18)++, b(19)++, b(19)-196++, b(20)-98++, b(20)++, b(20)-196++, b(21)-196++, b(21)-98++, b(21)++, b(22)++, b(23)-98++, b(23)++, b(23)-196++, b(24)-196++, b(24)-98++, b(25)-196++, b(25)-98++, b(25)++, b(26)++, b(26)-196++, b(26)-98++, b(27)++, b(27)-98++, b(27)-196++

**Matched y ions:** y(3), y(5), y(6), y(7)++, y(7), y(8), y(9), y(10), y(10)++, y(11), y(11)++, y(11)-98, y(12), y(12)-98, y(12)-98++, y(13), y(13)-98, y(13)-98++, y(14)-98, y(14), y(14)-98++, y(14)++, y(15), y(15)++, y(15)-98++, y(16)-98++, y(16), y(16)++, y(17)++, y(17)-98, y(17)-98++, y(18)-98, y(18)-98++, y(19)-98++, y(19)++, y(20)++, y(21)-98++, y(21)++, y(22)-98++, y(22)++, y(23)++, y(23)-196++, y(23)-98++, y(24)-98++, y(24)++, y(24)-196++, y(25)-196++, y(25)++, y(26)++, y(27)++, y(27)-98++

**Precursor origin neutral loss: +**

## Peptide No.318

**GPARPSLPGAPPDEVYLSDSPAEPAVK**

**Confirmed sites: @S:18**

**Ambiguous sites:**



MS/MS Fragmentation of **GPARPSLPGAPPDEVYLSDSAEPAPVK**

Found in **SYP2L\_MOUSE**, Synaptopodin 2-like protein OS=Mus musculus GN=Synpo2l PE=2 SV=1

Match to Query 6875: 2961.521526 from(988.181118,3+)

Title: Elution from: 49.011 to 49.011 scan no 4475 cid35.00 polarity:+:MA10:m1s

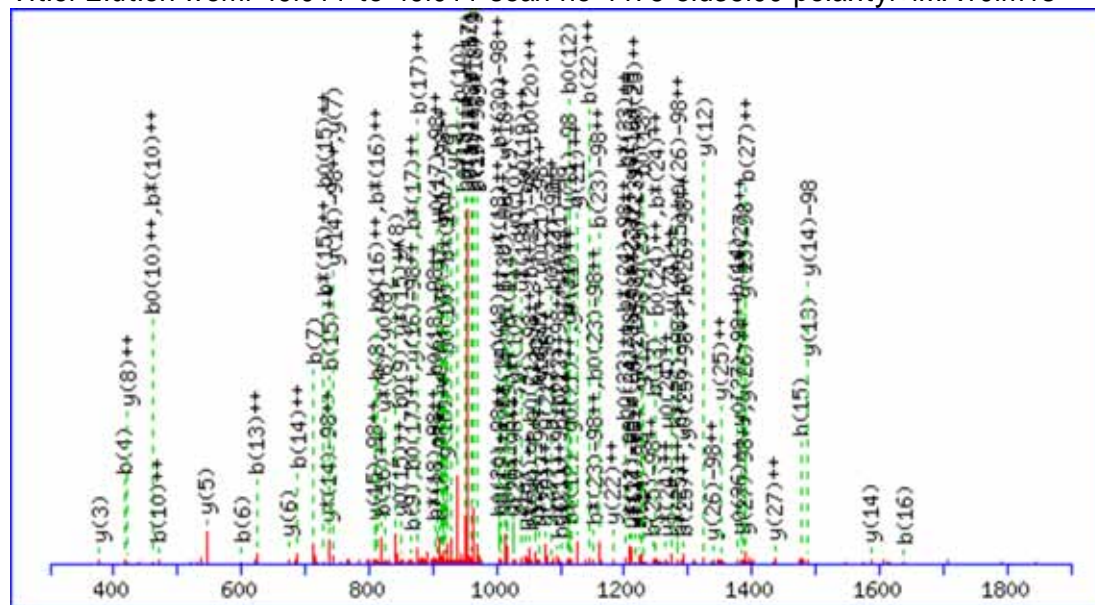

**Monoisotopic mass of neutral peptide Mr(calc): 2961.5161**

**Fixed modifications:** Carbamidomethyl (C) (apply to specified residues or termini only)

**Variable modifications:**

**N-term :** Dimethyl:2H(4)13C(2) (N-term)

**S18 :** Phospho (ST), with neutral losses 0.0000(shown in table), 97.9769

**K28 :** Dimethyl:2H(4)13C(2) (K)

**Ions Score:** 82 **Expect:** 4.5e-007

**Matched b ions:** b(4), b(6), b(7), b(8), b(9), b(10), b(10)++, b(13)++, b(13), b(14)++, b(14), b(15)++, b(15), b(16)++, b(16), b(17)++, b(18)-98++, b(18)++, b(19)++, b(19)-98++, b(20)-98++, b(20)++, b(21)++, b(21)-98++, b(22)-98++, b(22)++, b(23)-98++, b(23)++, b(24)-98++, b(25)++, b(25)-98++, b(26)-98++, b(27)++

**Matched y ions:** y(3), y(5), y(6), y(7), y(8), y(8)++, y(9), y(10), y(11), y(11)-98, y(12), y(12)-98, y(13)-98, y(13), y(14), y(14)-98, y(14)-98++, y(15)-98++, y(16)-98++, y(16)++, y(17)++, y(17)-98++, y(18)++, y(18)-98++, y(20)++, y(20)-98++, y(21)++, y(21)-98++, y(22)++, y(23)++, y(24)++, y(24)-98++, y(25)++, y(26)-98++, y(26)++, y(27)++, y(27)-98++

**Precursor origin neutral loss:** +

## Peptide No.319

### GPARPSLPGAPPDEVYLSDSAEPAPVK

**Confirmed sites:** @S:18,@S:20

**Ambiguous sites:**

MS/MS Fragmentation of **GPARPSLPGAPPDEVYLSDSAEPAPVK**

Found in **SYP2L\_MOUSE**, Synaptopodin 2-like protein OS=Mus musculus GN=Synpo2l PE=2 SV=1



Match to Query 7587: 3041.485044 from(1014.835624,3+)

Title: Elution from: 50.777 to 50.777 scan no 4832 cid35.00 polarity:+:MA10:m1s

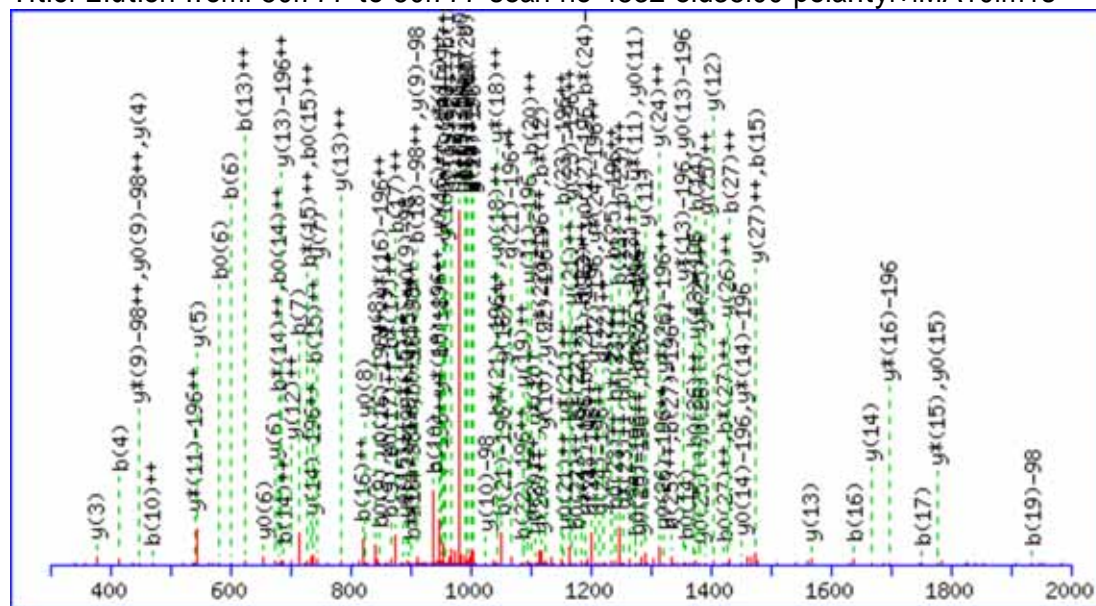

**Monoisotopic mass of neutral peptide Mr(calc):** 3041.4824

**Fixed modifications:** Carbamidomethyl (C) (apply to specified residues or termini only)

**Variable modifications:**

**N-term :** Dimethyl:2H(4)13C(2) (N-term)

**S18 :** Phospho (ST), with neutral losses 97.9769(shown in table), 0.0000

**S20 :** Phospho (ST), with neutral losses 97.9769(shown in table), 0.0000

**K28 :** Dimethyl:2H(4)13C(2) (K)

**Ions Score:** 79 **Expect:** 1.2e-006

**Matched b ions:** b(4), b(6), b(7), b(9), b(10), b(10)++, b(13)++, b(13), b(14), b(14)++, b(15), b(15)++, b(16)++, b(16), b(17)++, b(17), b(18)-98++, b(18)++, b(19)-98, b(19)-98++, b(20)-98++, b(20)-196++, b(20)++, b(21)-196++, b(21)-98++, b(22)-98++, b(22)++, b(22)-196++, b(23)-98++, b(23)++, b(23)-196++, b(24)-196++, b(24)-98++, b(25)-98++, b(25)++, b(25)-196++, b(26)-196++, b(26)-98++, b(26)++, b(27)++, b(27)-196++, b(27)-98++

**Matched y ions:** y(3), y(4), y(5), y(6), y(7), y(8), y(9)-98, y(10), y(10)-98, y(11), y(11)-98, y(11)-196, y(12), y(12)-98++, y(12)-98, y(12)++, y(12)-196, y(13), y(13)-98++, y(13)-98, y(13)++, y(13)-196++, y(13)-196, y(14)-196++, y(14)-98, y(14)-98++, y(14), y(15)-98, y(15)-98++, y(15)++, y(16)++, y(17)-98++, y(17)-98, y(17)++, y(18)++, y(18)-196++, y(18)-98++, y(19)-196++, y(19)-98++, y(19)++, y(20)++, y(20)-98++, y(21)++, y(21)-98++, y(21)-196++, y(22)-196++, y(22)++, y(23)-98++, y(23)++, y(23)-196++, y(24)++, y(24)-196++, y(24)-98++, y(25)++, y(25)-98++, y(26)++, y(27)++, y(27)-98++

**Precursor origin neutral loss:** +

## Peptide No.320

**GPAPSLPGAPPDEVYLS DSPAEPAPVK**

**Confirmed sites:** @S:6,@S:18

**Ambiguous sites:**

MS/MS Fragmentation of **GPAPSLPGAPPDEVYLS DSPAEPAPVK**

Found in **SYP2L\_MOUSE**, Synaptopodin 2-like protein OS=Mus musculus GN=Synpo2l PE=2 SV=1

Match to Query 6693: 3041.486031 from(1014.835953,3+)

Title: Elution from: 51.337 to 51.337 scan no 4688 cid35.00 polarity:+:MA10:m1s

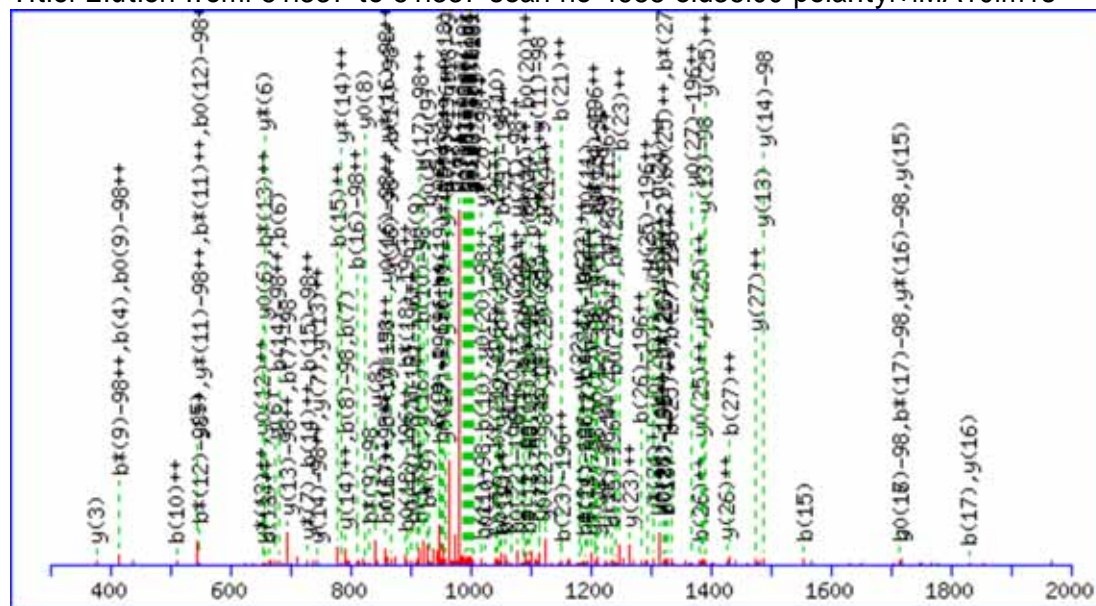

**Monoisotopic mass of neutral peptide Mr(calc):** 3041.4824

**Fixed modifications:** Carbamidomethyl (C) (apply to specified residues or termini only)

**Variable modifications:**

**N-term :** Dimethyl:2H(4)13C(2) (N-term)

**S6 :** Phospho (ST), with neutral losses 0.0000(shown in table), 97.9769

**S18 :** Phospho (ST), with neutral losses 0.0000(shown in table), 97.9769

**K28 :** Dimethyl:2H(4)13C(2) (K)

**Ions Score:** 66 **Expect:** 2.4e-005

**Matched b ions:** b(4), b(6), b(7)-98, b(7), b(8)-98, b(9), b(10)++, b(10)-98, b(10), b(11)-98, b(11), b(12)-98, b(13)++, b(13), b(14)++, b(14)-98, b(14)-98, b(15), b(15)++, b(15)-98, b(16)++, b(16)-98, b(17), b(17)-98, b(17)++, b(18)-196, b(18)-98, b(18)++, b(19)++, b(19)-196, b(20)++, b(20)-98, b(21)-98, b(21)-196, b(21)++, b(22)-196, b(22)-98, b(22)++, b(23)++, b(23)-98, b(23)-196, b(24)-98, b(24)-196, b(25)++, b(25)-98, b(25)-196, b(26)++, b(26)-98, b(26)-196, b(27)++, b(27)-196, b(27)-98

**Matched y ions:** y(3), y(5), y(6), y(7), y(8), y(9), y(10), y(11), y(11)-98, y(12), y(12)-98, y(13)-98, y(13)++, y(13)-98, y(13)++, y(14)++, y(14)-98, y(14)-98, y(15), y(15)++, y(16), y(16)-98, y(16)++, y(17)++, y(17)-98, y(18)-98, y(19)-98, y(19)++, y(20)++, y(21)++, y(21)-98, y(22)++, y(23)++, y(24)++, y(24)-98, y(25)++, y(25)-196, y(26)++, y(27)++

**Precursor origin neutral loss:** +

## Peptide No.321

GPDEAIEDGEEGSEDDAEWVTK

Confirmed sites: @S:13

Ambiguous sites:

MS/MS Fragmentation of **GPDEAIEDGEEGSEDDAEWVTK**

Found in **EHD2\_MOUSE**, EH domain-containing protein 2 OS=Mus musculus GN=Ehd2 PE=1 SV=1

Match to Query 6374: 2612.071204 from(1307.042878,2+)

Title: Elution from: 52.272 to 52.272 scan no 4861 cid35.00 polarity:+:MA10:m1s

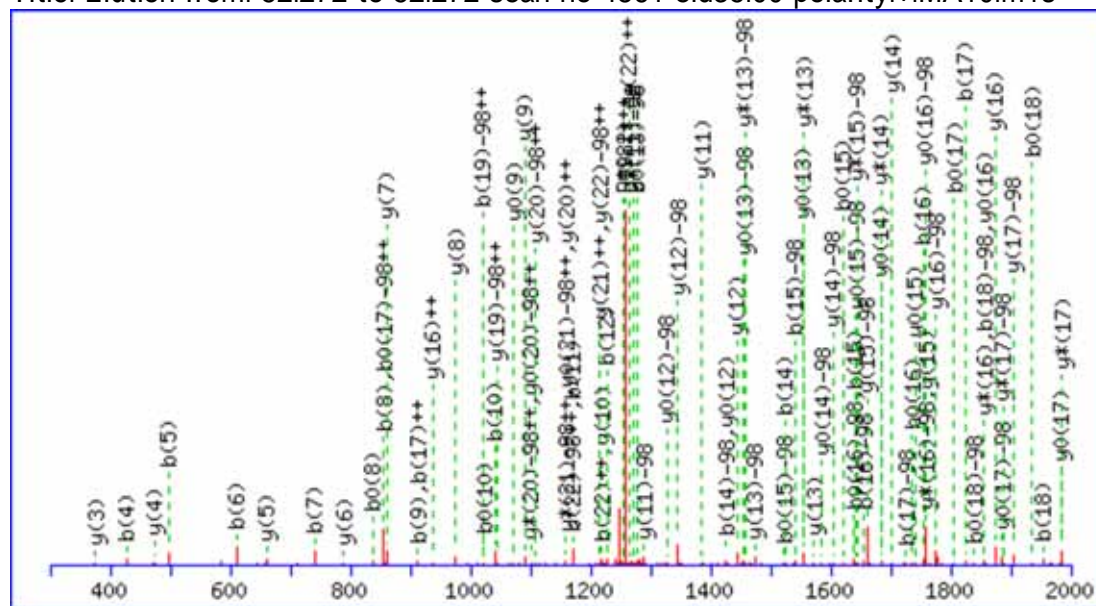

**Monoisotopic mass of neutral peptide Mr(calc): 2612.0691**

**Fixed modifications:** Carbamidomethyl (C) (apply to specified residues or termini only)

**Variable modifications:**

**N-term :** Dimethyl (N-term)

**S13 :** Phospho (ST), with neutral losses 97.9769(shown in table), 0.0000

**K23 :** Dimethyl (K)

**Ions Score: 95 Expect: 1.7e-008**

**Matched b ions:** b(4), b(5), b(6), b(7), b(8), b(9), b(10), b(11), b(12), b(14)-98, b(14), b(15)-98, b(15), b(16)-98, b(16), b(17)++, b(17), b(17)-98, b(18), b(18)-98, b(19)-98++, b(22)-98++, b(22)++

**Matched y ions:** y(3), y(4), y(5), y(6), y(7), y(8), y(9), y(10), y(11)-98, y(11), y(12)-98, y(12), y(13)-98, y(13), y(14)-98, y(14), y(15)-98, y(15), y(16), y(16)++, y(16)-98, y(17)-98, y(19)-98++, y(20)++, y(20)-98++, y(21)++, y(22)++, y(22)-98++

**Precursor origin neutral loss:** +

## Peptide No.322

**GPDEAIEDGEEGSEDDAEWVVK**

**Confirmed sites:** @S:13

**Ambiguous sites:**

**MS/MS Fragmentation of GPDEAIEDGEEGSEDDAEWVVK**

Found in **EHD2\_MOUSE**, EH domain-containing protein 2 OS=Mus musculus GN=Ehd2 PE=1 SV=1

Match to Query 6237: 2624.134192 from(1313.074372,2+)

Title: Elution from: 52.189 to 52.189 scan no 4774 cid35.00 polarity:+:MA10:m1s



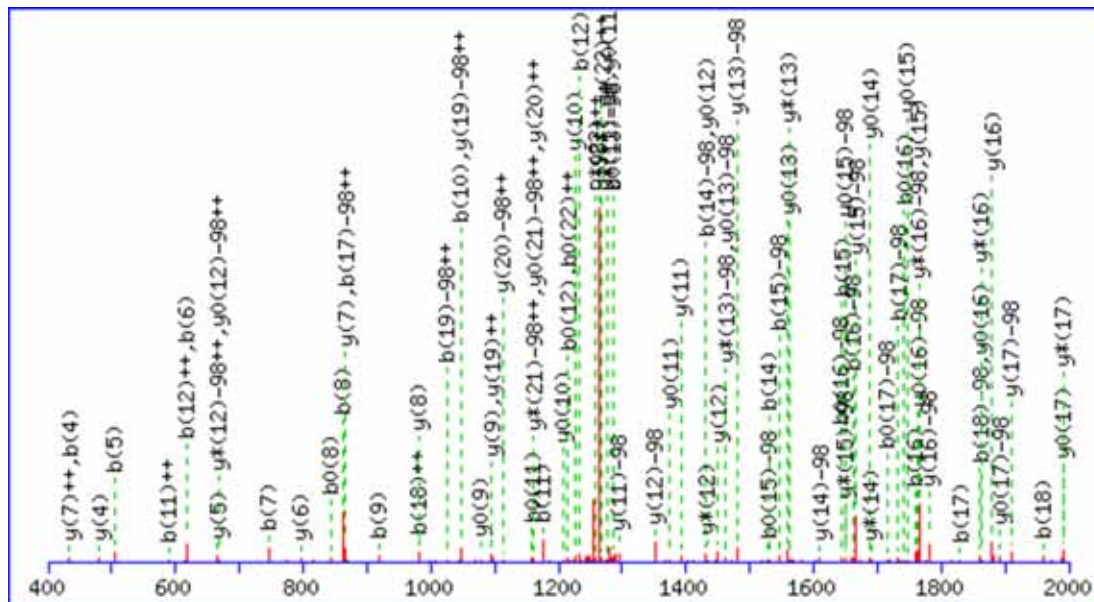

**Monoisotopic mass of neutral peptide Mr(calc):** 2624.1327

**Fixed modifications:** Carbamidomethyl (C) (apply to specified residues or termini only)

**Variable modifications:**

**N-term :** Dimethyl:2H(4)13C(2) (N-term)

**S13 :** Phospho (ST), with neutral losses 97.9769(shown in table), 0.0000

**K23 :** Dimethyl:2H(4)13C(2) (K)

**Ions Score:** 98 **Expect:** 1.2e-008

**Matched b ions:** b(4), b(5), b(6), b(7), b(8), b(9), b(10), b(11), b(11)++, b(12)++, b(12), b(14)-98, b(14), b(15)-98, b(15), b(16)-98, b(16), b(17)-98++, b(17)-98, b(17), b(18)++, b(18), b(18)-98, b(19)-98++  
**Matched y ions:** y(4), y(5), y(6), y(7)++, y(7), y(8), y(9), y(10), y(11), y(11)-98, y(12)-98, y(12), y(13)-98, y(14)-98, y(15)-98, y(15), y(16), y(16)-98, y(17)-98, y(19)-98++, y(19)++, y(20)-98++, y(20)++, y(22)++  
**Precursor origin neutral loss:** +

## Peptide No.323

**GPPSPAPVMHSPSR**

**Confirmed sites:** @S:4,@S:12

**Ambiguous sites:**

MS/MS Fragmentation of **GPPSPAPVMHSPSR**

Found in **SNW1\_MOUSE**, SNW domain-containing protein 1 OS=Mus musculus GN=Snw1 PE=1 SV=3

Match to Query 3836: 1716.709710 from(573.243846,3+)

Title: Elution from: 28.367 to 28.367 scan no 2080 cid35.00 polarity:+MA10



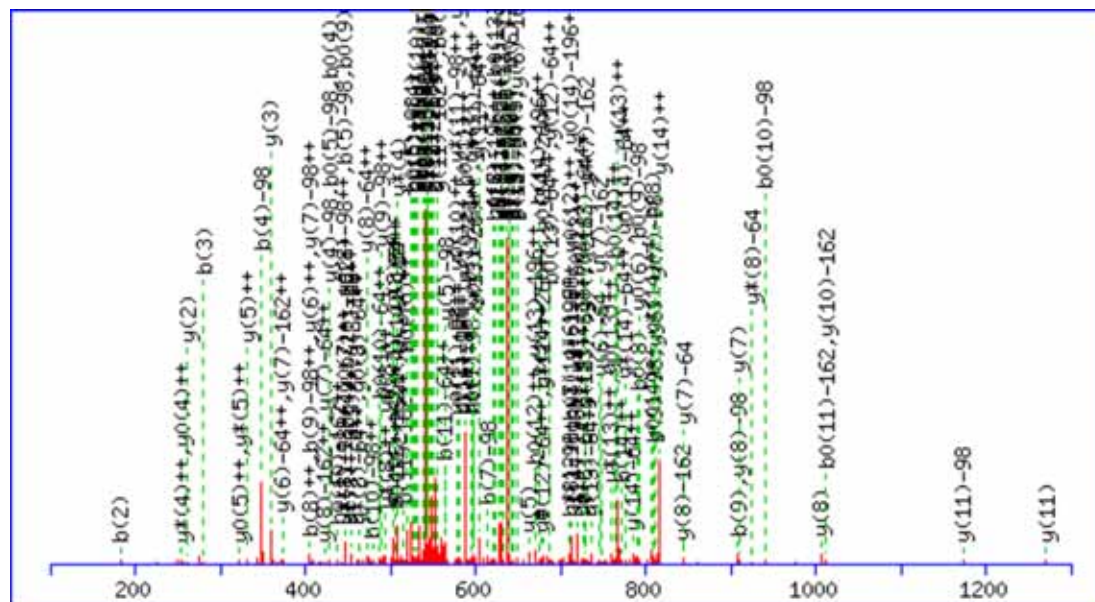

**Monoisotopic mass of neutral peptide Mr(calc):** 1716.7096

**Fixed modifications:** Carbamidomethyl (C) (apply to specified residues or termini only)

**Variable modifications:**

**N-term :** Dimethyl (N-term)

**S4 :** Phospho (ST), with neutral losses 0.0000(shown in table), 97.9769

**M10 :** Oxidation (M), with neutral losses 0.0000(shown in table), 63.9983

**S12 :** Phospho (ST), with neutral losses 0.0000(shown in table), 97.9769

**Ions Score:** 47 **Expect:** 0.00049

**Matched b ions:** b(2), b(3), b(4)-98, b(4), b(5)-98, b(5), b(6), b(6)-98, b(7), b(7)-98, b(8)++, b(8)-98, b(8), b(9), b(9)-98++, b(9)++, b(9)-98, b(10)-98++, b(10)++, b(11)-98++, b(11)++, b(12)-98++, b(12)++, b(12)-196++, b(13)-196++, b(13)-98++, b(13)++, b(14)-196++, b(14)++

**Matched y ions:** y(2), y(3), y(4)-98, y(4), y(5)++, y(5), y(5)-98, y(6)++, y(6)-98, y(6), y(7)-98++, y(7), y(7)++, y(7)-98, y(8)-98, y(8), y(8)-98++, y(8)++, y(9)-98++, y(9)++, y(10)++, y(10)-98++, y(11)++, y(11)-98, y(11), y(11)-98++, y(12)++, y(12)-98++, y(12)-196++, y(13)++, y(13)-98++, y(13)-196++, y(14)-98++, y(14)++, y(14)-196++

**Precursor origin neutral loss:** +

## Peptide No.324

**GPPSPAPVMHSPSR**

**Confirmed sites:** @S:4,@S:12

**Ambiguous sites:**

**MS/MS Fragmentation of GPPSPAPVMHSPSR**

Found in **SNW1\_MOUSE**, SNW domain-containing protein 1 OS=Mus musculus GN=Snw1 PE=1 SV=3

Match to Query 2982: 1722.741873 from(575.254567,3+)

Title: Elution from: 28.241 to 28.241 scan no 1908 cid35.00 polarity:+:MA10

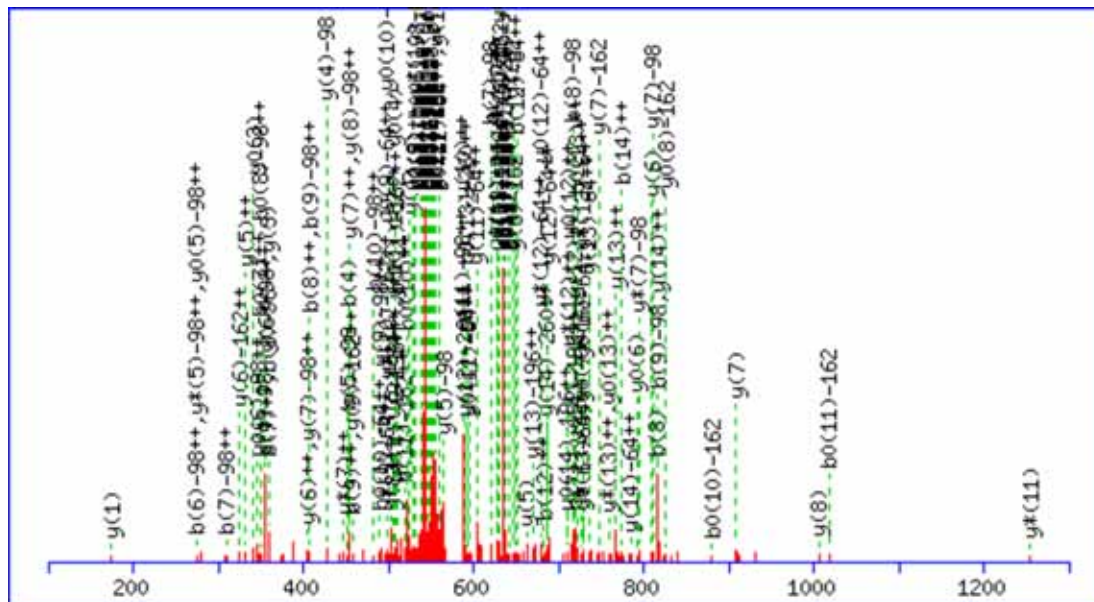

**Monoisotopic mass of neutral peptide Mr(calc):** 1722.7414

**Fixed modifications:** Carbamidomethyl (C) (apply to specified residues or termini only)

**Variable modifications:**

**N-term :** Dimethyl:2H(4)13C(2) (N-term)

**S4 :** Phospho (ST), with neutral losses 0.0000(shown in table), 97.9769

**M10 :** Oxidation (M), with neutral losses 0.0000(shown in table), 63.9983

**S12 :** Phospho (ST), with neutral losses 0.0000(shown in table), 97.9769

**Ions Score:** 36 **Expect:** 0.0078

**Matched b ions:** b(4)-98, b(4), b(5), b(5)-98, b(6)-98++, b(6)-98, b(7)++, b(7), b(7)-98++, b(7)-98, b(8)-98++, b(8), b(8)++, b(8)-98, b(9)-98, b(9)-98++, b(9)++, b(10)-98++, b(10)++, b(11)-98++, b(12)-98++, b(12)++, b(13)-196++, b(13)-98++, b(14)++

**Matched y ions:** y(1), y(3), y(4)-98, y(4), y(5)++, y(5)-98, y(5), y(6)++, y(6), y(6)-98++, y(7), y(7)-98++, y(7)-98, y(7)++, y(8), y(8)-98++, y(8)++, y(9)-98++, y(9)++, y(10)++, y(10)-98++, y(11)++, y(11)-98++, y(12)++, y(12)-98++, y(13)-98++, y(13)++, y(13)-196++, y(14)-196++, y(14)++, y(14)-98++

**Precursor origin neutral loss:** +

## Peptide No.325

**GPQFGSEVELR**

**Confirmed sites:** @S:6

**Ambiguous sites:**

**MS/MS Fragmentation of GPQFGSEVELR**

Found in **ACE\_MOUSE**, Angiotensin-converting enzyme OS=Mus musculus GN=Ace PE=1 SV=3

Match to Query 1330: 1325.602306 from(663.808429,2+)

Title: Elution from: 44.499 to 44.499 scan no 4039 cid35.00 polarity:+:MA10

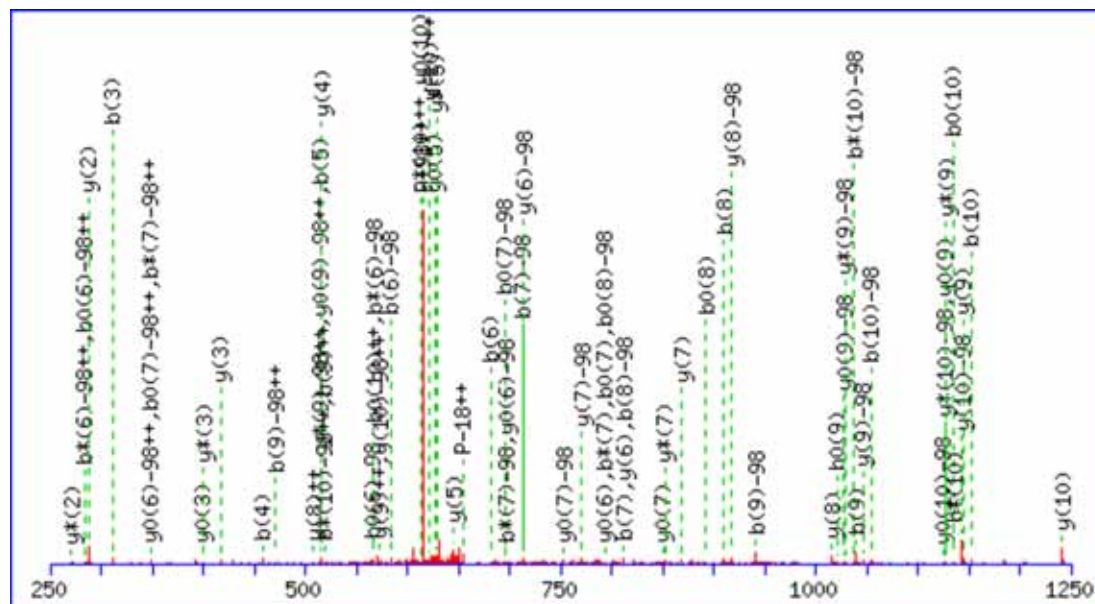

**Monoisotopic mass of neutral peptide Mr(calc):** 1325.6017

**Fixed modifications:** Carbamidomethyl (C) (apply to specified residues or termini only)

**Variable modifications:**

**N-term :** Dimethyl (N-term)

**S6 :** Phospho (ST), with neutral losses 97.9769(shown in table), 0.0000

**Ions Score:** 50 **Expect:** 0.00023

**Matched b ions:** b(3), b(4), b(5), b(6)-98, b(6), b(7)-98, b(7), b(8)-98, b(8), b(9)-98, b(9), b(9)-98++, b(9)++, b(10)-98, b(10)

**Matched y ions:** y(2), y(3), y(4), y(5), y(6), y(6)-98, y(7)-98, y(7), y(8)-98, y(8), y(8)++, y(9), y(9)-98, y(9)++, y(10)-98, y(10), y(10)-98++, y(10)++

**Precursor origin neutral loss:** +

## Peptide No.326

**GPQFGSEVELR**

**Confirmed sites:** @S:6

**Ambiguous sites:**

MS/MS Fragmentation of **GPQFGSEVELR**

Found in **ACE\_MOUSE**, Angiotensin-converting enzyme OS=Mus musculus GN=Ace PE=1 SV=3

Match to Query 1502: 1331.634006 from(666.824279,2+)

Title: Elution from: 44.418 to 44.418 scan no 4050 cid35.00 polarity:+:MA10

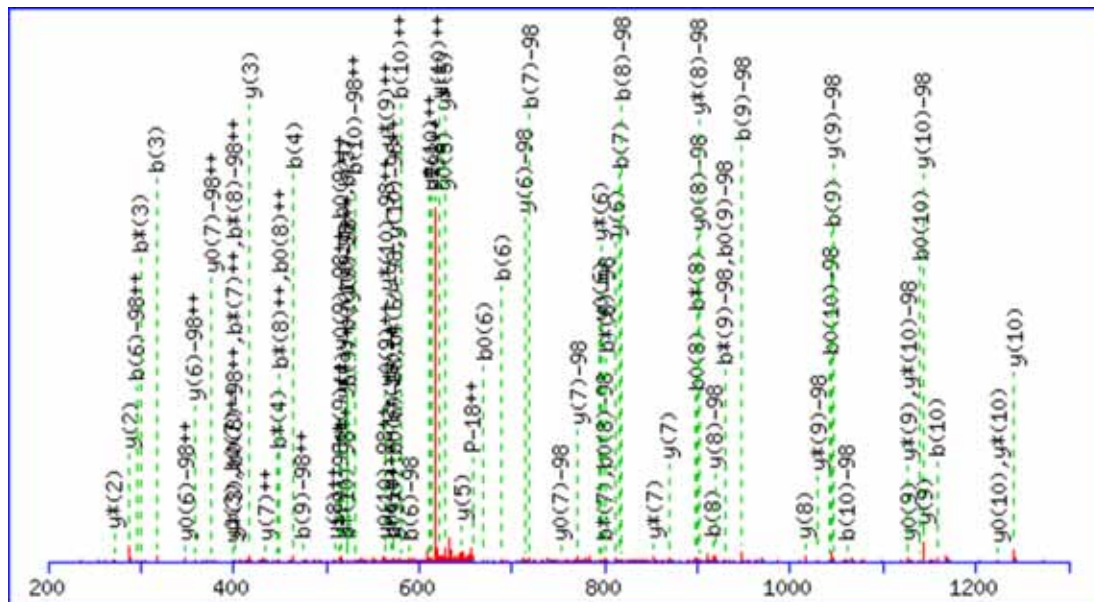

**Monoisotopic mass of neutral peptide Mr(calc):** 1331.6335

**Fixed modifications:** Carbamidomethyl (C) (apply to specified residues or termini only)

**Variable modifications:**

**N-term :** Dimethyl:2H(4)13C(2) (N-term)

**S6 :** Phospho (ST), with neutral losses 97.9769(shown in table), 0.0000

**Ions Score:** 49 **Expect:** 0.00042

**Matched b ions:** b(3), b(4), b(5), b(6)-98++, b(6)-98, b(6), b(7), b(7)-98, b(8), b(8)-98, b(9)-98, b(9), b(9)-98++, b(9)++, b(10), b(10)-98, b(10)-98++, b(10)++

**Matched y ions:** y(2), y(3), y(4), y(5), y(6), y(6)-98++, y(6)-98, y(7)-98, y(7), y(7)++, y(8), y(8)-98, y(8)++, y(9)-98, y(9), y(9)-98++, y(9)++, y(10)-98, y(10), y(10)-98++, y(10)++

**Precursor origin neutral loss:** +

## Peptide No.327

**GQEDSLASAVDATTGQEACDSD**

**Confirmed sites:** @S:21

**Ambiguous sites:**

MS/MS Fragmentation of **GQEDSLASAVDATTGQEACDSD**

Found in **CCD12\_MOUSE**, Coiled-coil domain-containing protein 12 OS=Mus musculus GN=Ccdc12  
PE=1 SV=2

Match to Query 7140: 2333.885386 from(1167.949969,2+)

Title: Elution from: 53.723 to 53.723 scan no 5325 cid35.00 polarity:+MA10:m1s



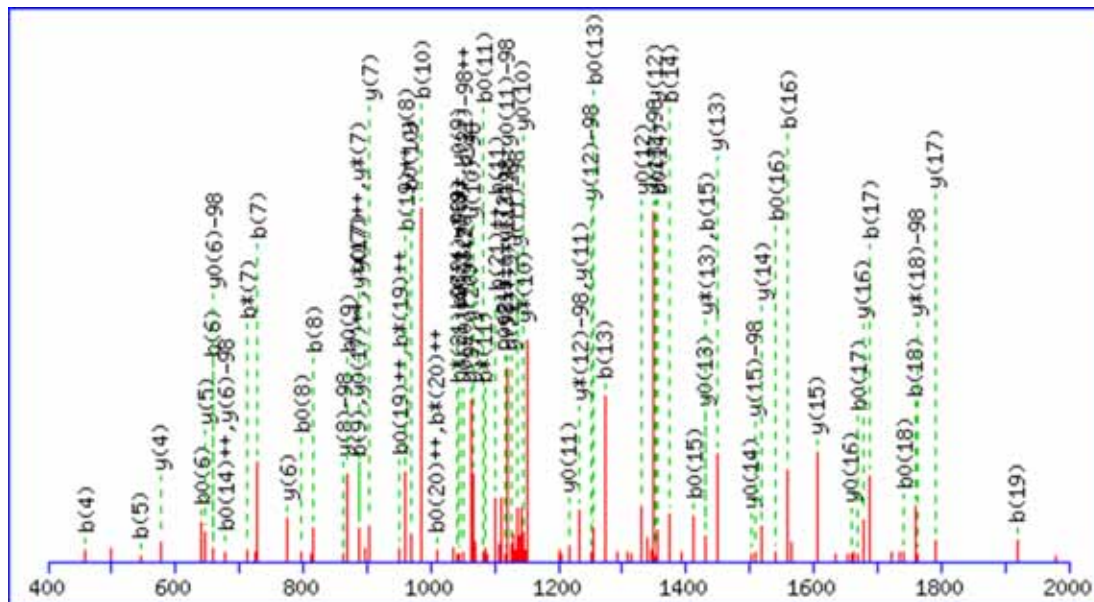

**Monoisotopic mass of neutral peptide Mr(calc):** 2333.8843

**Fixed modifications:** Carbamidomethyl (C) (apply to specified residues or termini only)

**Variable modifications:**

**N-term :** Dimethyl (N-term)

**S21 :** Phospho (ST), with neutral losses 0.0000(shown in table), 97.9769

**Ions Score:** 118 **Expect:** 3.7e-011

**Matched b ions:** b(4), b(5), b(6), b(7), b(8), b(9), b(10), b(11), b(13), b(14), b(15), b(16), b(17), b(18), b(19), b(19)++, b(21)-98++, b(21)++

**Matched y ions:** y(4), y(5), y(6), y(6)-98, y(7), y(8), y(8)-98, y(9), y(10)-98, y(11), y(11)-98, y(12), y(12)-98, y(13), y(13)-98, y(14), y(15), y(15)-98, y(16), y(17), y(20)++, y(21)++

**Precursor origin neutral loss:** +

## Peptide No.328

**QQGSEPAAITGGQVGPETPEPPPSPETR**

**Confirmed sites:** @S:24

**Ambiguous sites:**

MS/MS Fragmentation of **QQGSEPAAITGGQVGPETPEPPPSPETR**

Found in **EH1L1\_MOUSE**, EH domain-binding protein 1-like protein 1 OS=Mus musculus GN=Ehbp111 PE=2 SV=1

Match to Query 8508: 2947.360755 from(983.460861,3+)

Title: Elution from: 42.898 to 42.898 scan no 4044 cid35.00 polarity:+MA10:m1s

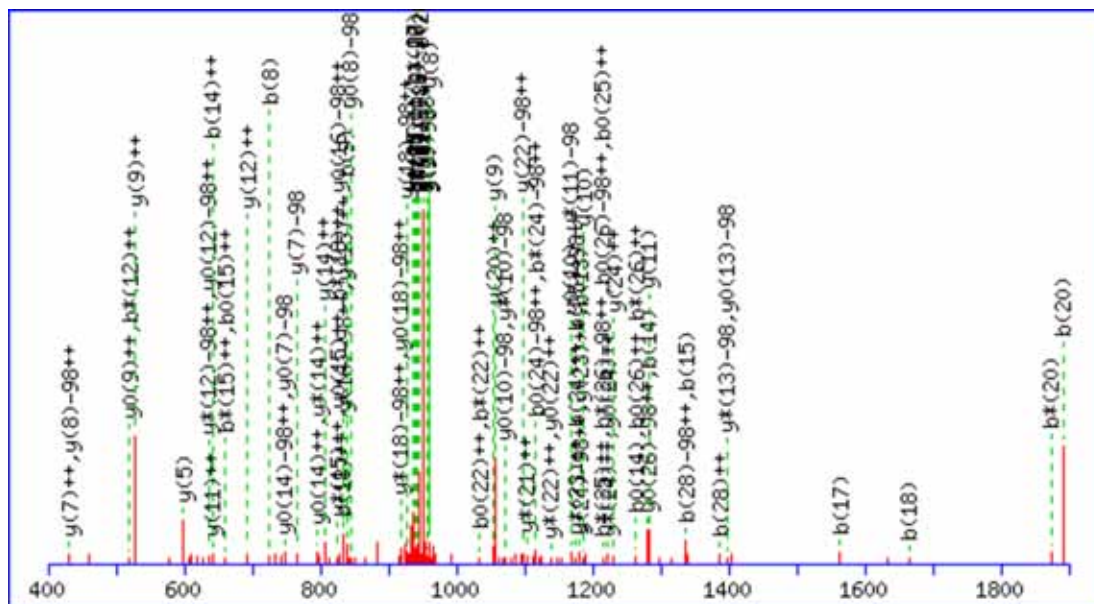

**Monoisotopic mass of neutral peptide Mr(calc):** 2947.3601

**Fixed modifications:** Carbamidomethyl (C) (apply to specified residues or termini only)

**Variable modifications:**

**N-term :** Dimethyl (N-term)

**S24 :** Phospho (ST), with neutral losses 0.0000(shown in table), 97.9769

**Ions Score:** 39 **Expect:** 0.012

**Matched b ions:** b(8), b(9), b(10), b(13), b(14)++, b(14), b(15), b(17), b(18), b(18)++, b(20), b(20)++, b(24)++, b(25)-98++, b(28)-98++, b(28)++

**Matched y ions:** y(5), y(7)++, y(7)-98, y(8)-98++, y(8), y(9)++, y(9), y(9)-98, y(10), y(11), y(11)++, y(12)++, y(14)++, y(15)++, y(16)-98++, y(18)-98++, y(19)-98++, y(20)++, y(22)-98++, y(23)++, y(24)-98++, y(24)++

**Precursor origin neutral loss:** +

## Peptide No.329

**QQSIDDMIPAQK**

**Confirmed sites:** @S:3

**Ambiguous sites:**

**MS/MS Fragmentation of** **QQSIDDMIPAQK**

Found in **KCRM\_MOUSE**, Creatine kinase M-type OS=Mus musculus GN=Ckm PE=1 SV=1

Match to Query 1972: 1453.652730 from(727.833641,2+)

Title: Elution from: 33.611 to 33.611 scan no 2594 cid35.00 polarity:+:MA10

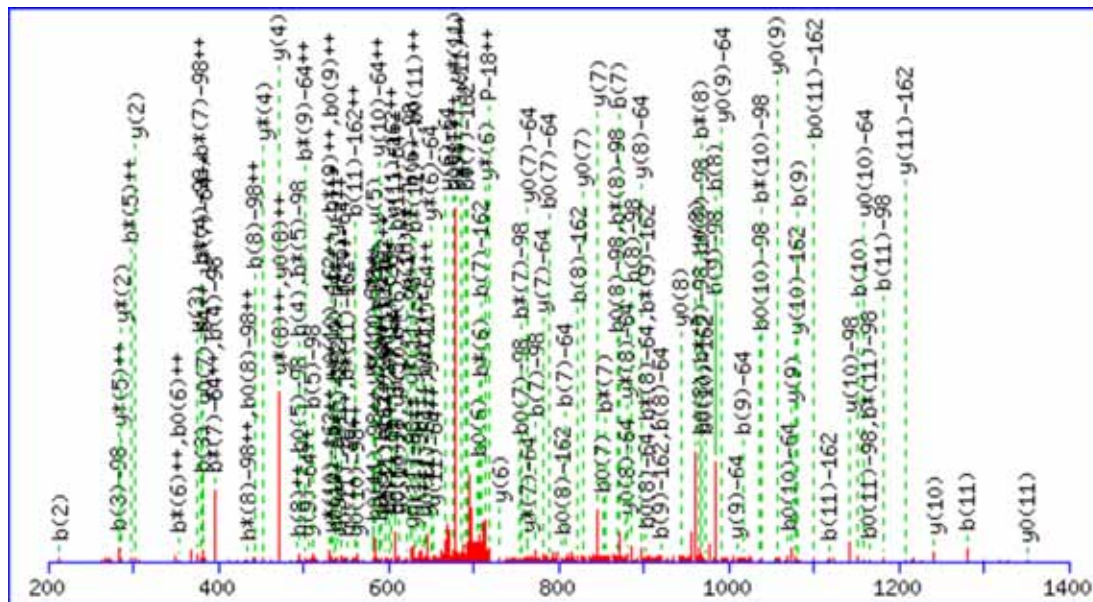

**Monoisotopic mass of neutral peptide Mr(calc):** 1453.6524

**Fixed modifications:** Carbamidomethyl (C) (apply to specified residues or termini only)

**Variable modifications:**

**N-term :** Dimethyl (N-term)

**S3 :** Phospho (ST), with neutral losses 0.0000(shown in table), 97.9769

**M7 :** Oxidation (M), with neutral losses 0.0000(shown in table), 63.9983

**K12 :** Dimethyl (K)

**Ions Score:** 55 **Expect:** 0.0001

**Matched b ions:** b(2), b(3)-98, b(3), b(4)-98, b(4), b(5), b(5)-98, b(6)-98, b(7), b(7)-98, b(8), b(8)-98, b(8)-98++, b(8)++, b(9)-98, b(9)++, b(9), b(10), b(11), b(11)-98, b(11)-98++, b(11)++

**Matched y ions:** y(2), y(3), y(4), y(5), y(6), y(7), y(8), y(9), y(9)++, y(10)-98, y(10), y(10)++, y(11)-98++, y(11)++

**Precursor origin neutral loss:** +

## Peptide No.330

**QQSIDDMIPAQK**

**Confirmed sites:** @S:3

**Ambiguous sites:**

**MS/MS Fragmentation of** **QQSIDDMIPAQK**

Found in **KCRM\_MOUSE**, Creatine kinase M-type OS=Mus musculus GN=Ckm PE=1 SV=1

Match to Query 1458: 1437.658128 from(719.836340,2+)

Title: Elution from: 43.990 to 43.990 scan no 3870 cid35.00 polarity:+:MA10

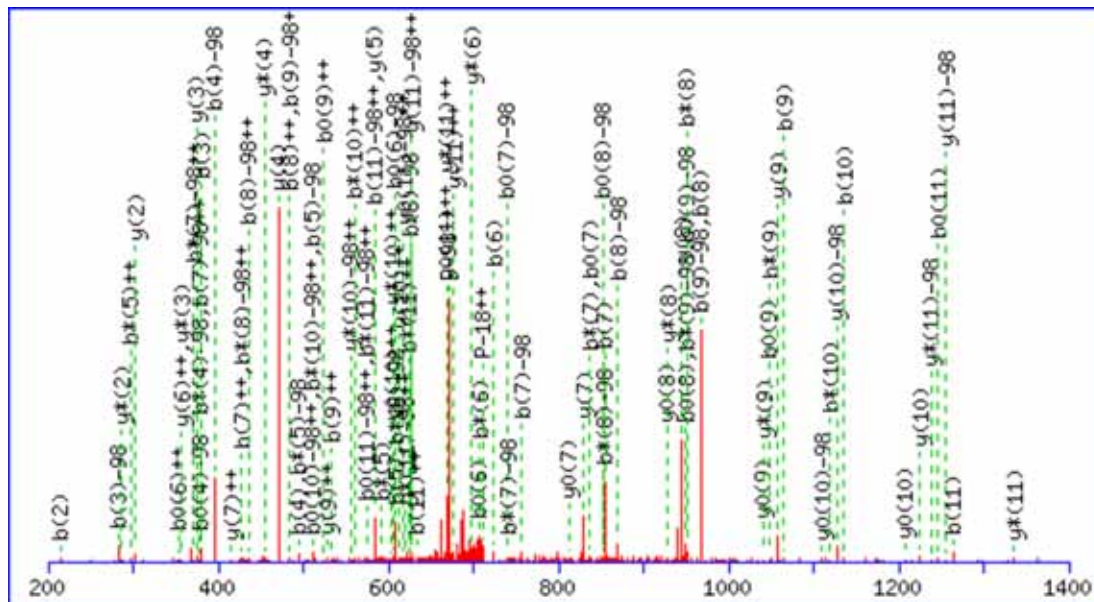

**Monoisotopic mass of neutral peptide Mr(calc):** 1437.6575

**Fixed modifications:** Carbamidomethyl (C) (apply to specified residues or termini only)

**Variable modifications:**

**N-term :** Dimethyl (N-term)

**S3 :** Phospho (ST), with neutral losses 0.0000(shown in table), 97.9769

**K12 :** Dimethyl (K)

**Ions Score:** 67 **Expect:** 6.5e-006

**Matched b ions:** b(2), b(3)-98, b(3), b(4)-98, b(4), b(5)-98, b(5), b(6), b(6)-98, b(7), b(7)-98, b(7)-98++, b(7)++, b(8), b(8)-98, b(8)-98++, b(8)++, b(9)-98, b(9), b(9)-98++, b(9)++, b(10), b(11)-98++, b(11), b(11)++

**Matched y ions:** y(2), y(3), y(4), y(5), y(6)++, y(7), y(7)++, y(8), y(9), y(9)++, y(10)-98, y(10), y(10)++, y(11)-98, y(11)-98++, y(11)++

**Precursor origin neutral loss:** +

## Peptide No.331

**QQSIDDMIPAQK**

**Confirmed sites:** @S:3

**Ambiguous sites:**

**MS/MS Fragmentation of** **QQSIDDMIPAQK**

Found in **KCRM\_MOUSE**, Creatine kinase M-type OS=Mus musculus GN=Ckm PE=1 SV=1

Match to Query 2035: 1465.717232 from(733.865892,2+)

Title: Elution from: 34.033 to 34.033 scan no 2687 cid35.00 polarity:+:MA10



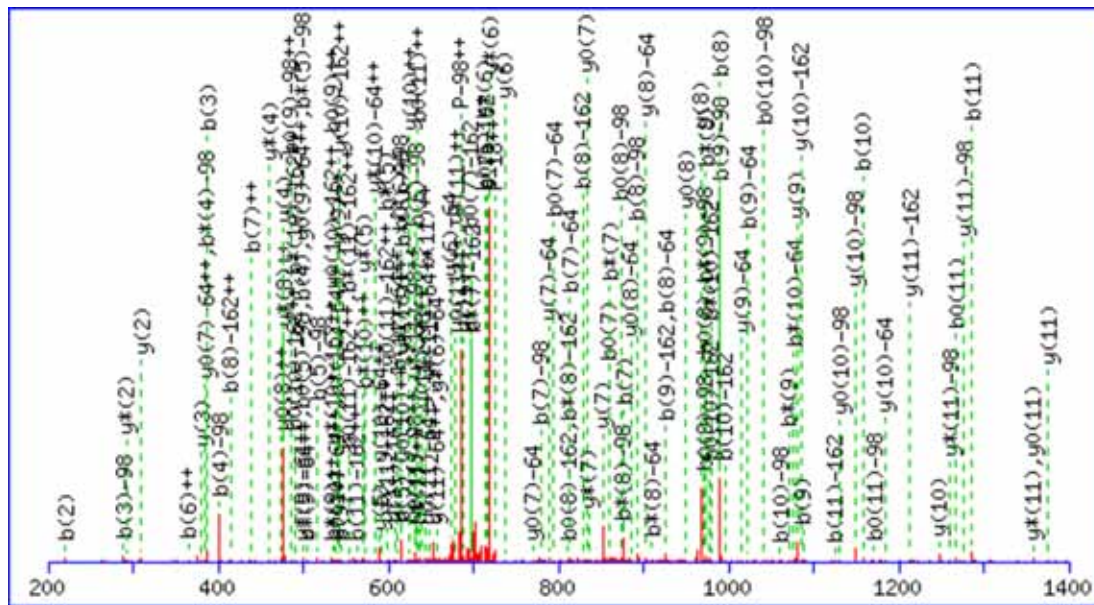

**Monoisotopic mass of neutral peptide Mr(calc):** 1465.7160

**Fixed modifications:** Carbamidomethyl (C) (apply to specified residues or termini only)

**Variable modifications:**

**N-term :** Dimethyl:2H(4)13C(2) (N-term)

**S3 :** Phospho (ST), with neutral losses 0.0000(shown in table), 97.9769

**M7 :** Oxidation (M), with neutral losses 0.0000(shown in table), 63.9983

**K12 :** Dimethyl:2H(4)13C(2) (K)

**Ions Score:** 53 **Expect:** 0.00024

**Matched b ions:** b(2), b(3)-98, b(3), b(4)-98, b(4), b(5), b(5)-98, b(6)++, b(6)-98, b(7), b(7)-98, b(7)++, b(8), b(8)-98, b(9), b(9)-98, b(9)++, b(10), b(10)-98, b(11), b(11)++

**Matched y ions:** y(2), y(3), y(4), y(5), y(6), y(7), y(8), y(9), y(9)++, y(10)-98, y(10), y(10)++, y(11), y(11)-98, y(11)-98++, y(11)++

**Precursor origin neutral loss:** +

## Peptide No.332

**QQSIDDMIPAQK**

**Confirmed sites: @S:3**

**Ambiguous sites:**

**MS/MS Fragmentation of QQSIDDMIPAQK**

Found in **KCRM\_MOUSE**, Creatine kinase M-type OS=Mus musculus GN=Ckm PE=1 SV=1

Match to Query 1965: 1449.720722 from(725.867637,2+)

Title: Elution from: 43.803 to 43.803 scan no 3970 cid35.00 polarity:+:MA10

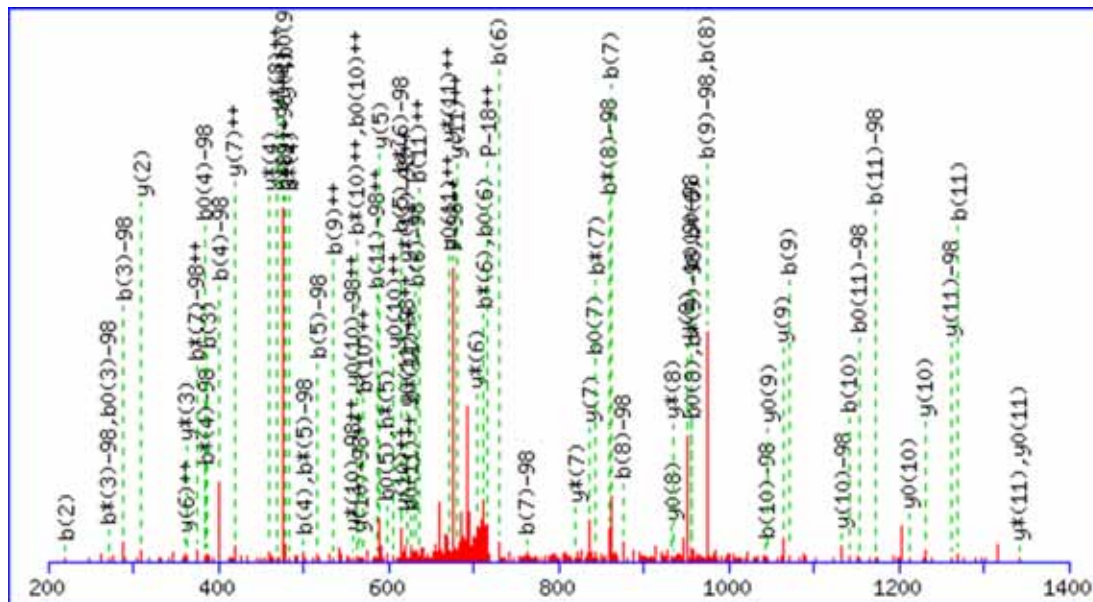

**Monoisotopic mass of neutral peptide Mr(calc):** 1449.7211

**Fixed modifications:** Carbamidomethyl (C) (apply to specified residues or termini only)

**Variable modifications:**

**N-term :** Dimethyl:2H(4)13C(2) (N-term)

**S3 :** Phospho (ST), with neutral losses 97.9769(shown in table), 0.0000

**K12 :** Dimethyl:2H(4)13C(2) (K)

**Ions Score:** 49 **Expect:** 0.0005

**Matched b ions:** b(2), b(3)-98, b(3), b(4)-98, b(4), b(5), b(5)-98, b(6), b(6)-98, b(7), b(7)-98, b(8), b(8)-98, b(9)-98, b(9), b(9)++, b(10), b(10)-98, b(10)++, b(11), b(11)-98, b(11)++, b(11)-98  
**Matched y ions:** y(2), y(4), y(5), y(6)++, y(7)++, y(7), y(8)++, y(8), y(9), y(10)-98, y(10), y(10)-98, y(10)++, y(11)-98, y(11)++  
**Precursor origin neutral loss:** +

## Peptide No.333

**GREPSSSQPVVPVDVEDQAK**

**Confirmed sites:** @S:5

**Ambiguous sites:**

MS/MS Fragmentation of **GREPSSSQPVVPVDVEDQAK**

Found in **PBIP1\_MOUSE**, Pre-B-cell leukemia transcription factor-interacting protein 1 OS=Mus musculus GN=Pbxip1 PE=1 SV=2

Match to Query 7516: 2259.078516 from(754.033448,3+)

Title: Elution from: 38.170 to 38.170 scan no 3381 cid35.00 polarity:+:MA10:m1s

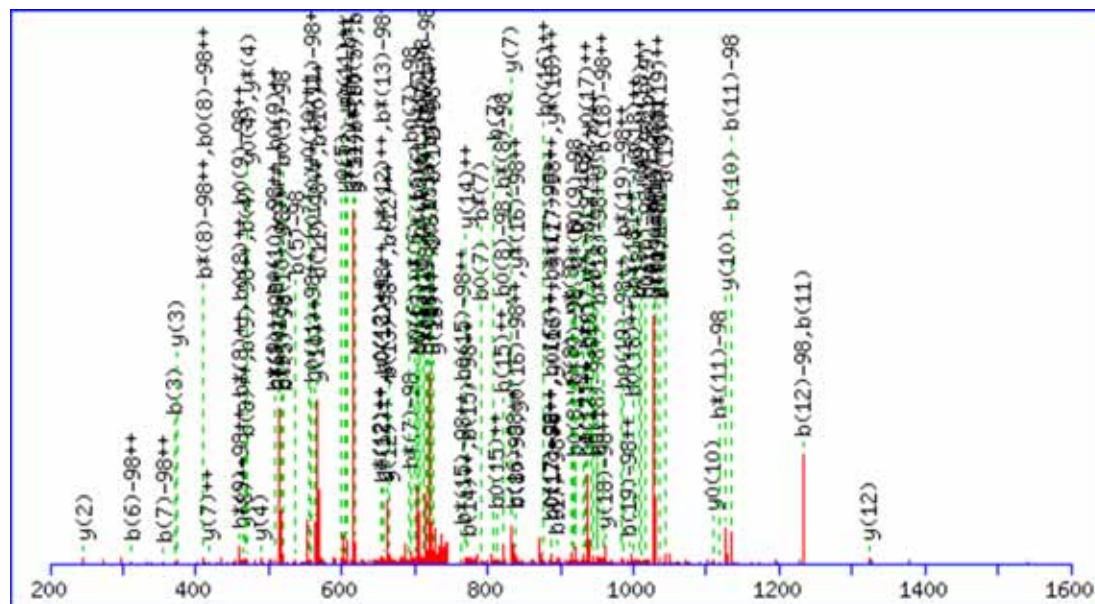

**Monoisotopic mass of neutral peptide Mr(calc):** 2259.0784

**Fixed modifications:** Carbamidomethyl (C) (apply to specified residues or termini only)

**Variable modifications:**

**N-term :** Dimethyl (N-term)

**S5 :** Phospho (ST), with neutral losses 97.9769(shown in table), 0.0000

**K20 :** Dimethyl (K)

**Ions Score:** 36 **Expect:** 0.022

**Matched b ions:** b(3), b(4), b(5)-98, b(6)-98++, b(6), b(7)-98++, b(7)-98, b(7), b(8), b(8)++, b(8)-98, b(9)++, b(9)-98++, b(9)-98, b(9), b(10)-98++, b(10)++, b(10), b(10)-98, b(11)++, b(11), b(11)-98++, b(11)-98, b(12)-98++, b(12)-98, b(12)++, b(13)++, b(13)-98++, b(14)-98++, b(14)++, b(15)++, b(15)-98++, b(16)++, b(16)-98++, b(17)-98++, b(17)++, b(18)-98++, b(18)++, b(19)++, b(19)-98++

**Matched y ions:** y(2), y(3), y(4), y(5), y(6), y(7), y(7)++, y(8), y(8)++, y(9)++, y(9), y(10), y(10)++, y(12), y(12)++, y(13)++, y(14)++, y(17)++, y(18)-98++, y(18)++

**Precursor origin neutral loss:** +

## Peptide No.334

**GREPSSSQPVVPVDVEDQAK**

**Confirmed sites: @S:6**

**Ambiguous sites:**

MS/MS Fragmentation of **GREPSSSQPVVPVDVEDQAK**

Found in **PBIP1\_MOUSE**, Pre-B-cell leukemia transcription factor-interacting protein 1 OS=Mus musculus GN=Pbxip1 PE=1 SV=2

Match to Query 5981: 2259.080808 from(754.034212,3+)

Title: Elution from: 38.053 to 38.053 scan no 3214 cid35.00 polarity:+:MA10:m1s

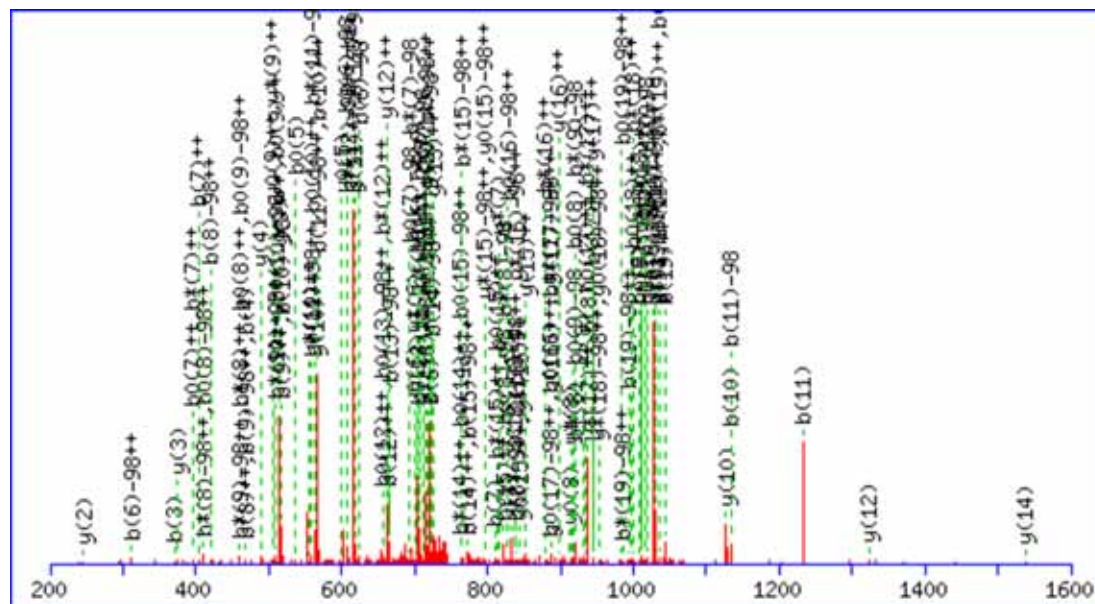

**Monoisotopic mass of neutral peptide Mr(calc):** 2259.0784

**Fixed modifications:** Carbamidomethyl (C) (apply to specified residues or termini only)

**Variable modifications:**

**N-term :** Dimethyl (N-term)

**S6 :** Phospho (ST), with neutral losses 0.0000(shown in table), 97.9769

**K20 :** Dimethyl (K)

**Ions Score:** 54 **Expect:** 0.00033

**Matched b ions:** b(3), b(4), b(6)-98++, b(6)-98, b(6), b(7)++, b(7)-98, b(7), b(8), b(8)-98++, b(8)++, b(8)-98, b(9)++, b(9), b(9)-98++, b(10)-98++, b(10)++, b(10), b(10)-98, b(11)++, b(11), b(11)-98++, b(11)-98, b(12)-98++, b(12)++, b(13)++, b(13)-98++, b(14)++, b(14)-98++, b(15)++, b(15)-98++, b(16)++, b(16)-98++, b(17)++, b(18)++, b(19)++, b(19)-98++

**Matched y ions:** y(2), y(3), y(4), y(5), y(6), y(7), y(8), y(9)++, y(9), y(10), y(10)++, y(12), y(12)++, y(13)++, y(14), y(15)++, y(16)++, y(17)++, y(18)++

**Precursor origin neutral loss:** +

## Peptide No.335

**GREPSSSQPVVPVDVEDQAK**

**Confirmed sites:** @S:7

**Ambiguous sites:**

MS/MS Fragmentation of **GREPSSSQPVVPVDVEDQAK**

Found in **PBIP1\_MOUSE**, Pre-B-cell leukemia transcription factor-interacting protein 1 OS=Mus musculus GN=Pbxip1 PE=1 SV=2

Match to Query 6894: 2259.080886 from(754.034238,3+)

Title: Elution from: 38.197 to 38.197 scan no 3425 cid35.00 polarity:+:MA10:m1s



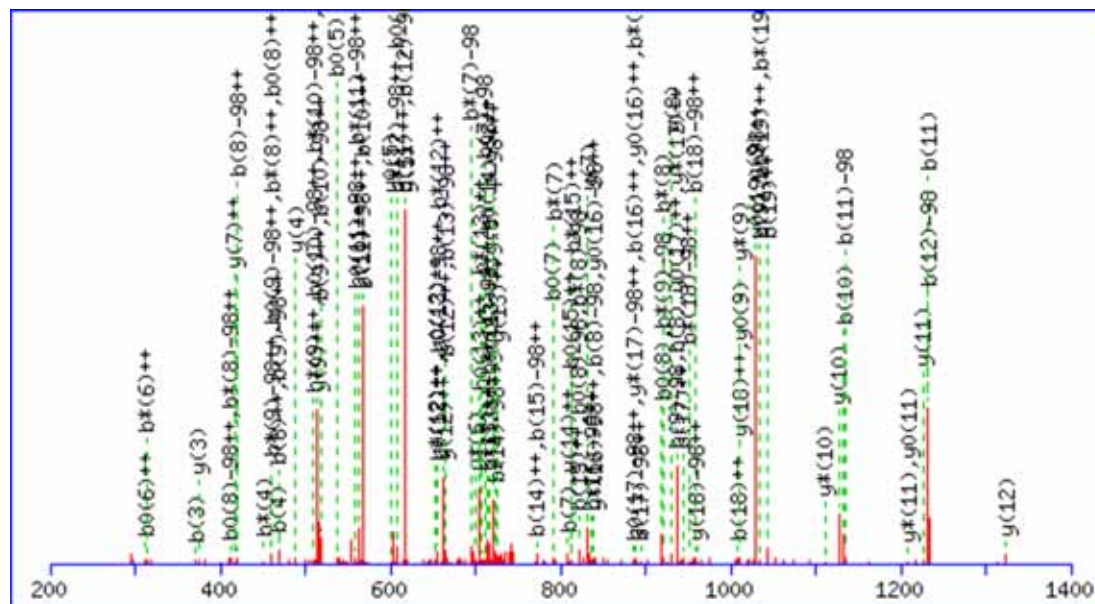

**Monoisotopic mass of neutral peptide Mr(calc):** 2259.0784

**Fixed modifications:** Carbamidomethyl (C) (apply to specified residues or termini only)

**Variable modifications:**

**N-term :** Dimethyl (N-term)

**S7 :** Phospho (ST), with neutral losses 97.9769(shown in table), 0.0000

**K20 :** Dimethyl (K)

**Ions Score:** 66 **Expect:** 1.9e-005

**Matched b ions:** b(3), b(4), b(7), b(7)-98, b(8)++, b(8), b(8)-98++, b(8)-98, b(9)-98++, b(9)-98, b(9)++, b(9), b(10)++, b(10), b(10)-98++, b(10)-98, b(11)-98++, b(11)++, b(11), b(11)-98, b(12)-98++, b(12)-98, b(12)++, b(13)++, b(13)-98++, b(14)-98++, b(14)++, b(15)++, b(15)-98++, b(16)++, b(16)-98++, b(17)++, b(17)-98++, b(18)++, b(18)-98++, b(19)++

**Matched y ions:** y(3), y(4), y(5), y(6), y(7), y(7)++, y(8), y(9), y(9)++, y(10), y(10)++, y(11), y(12), y(12)++, y(13)++, y(14)++, y(18)++, y(18)-98++

**Precursor origin neutral loss:** +

## Peptide No.336

**GREPSSSQPVVPVDVEDQAK**

**Confirmed sites: @S:7**

**Ambiguous sites:**

MS/MS Fragmentation of **GREPSSSQPVVPVDVEDQAK**

Found in **PBIP1\_MOUSE**, Pre-B-cell leukemia transcription factor-interacting protein 1 OS=Mus musculus GN=Pbxip1 PE=1 SV=2

Match to Query 6289: 2271.142767 from(758.054865,3+)

Title: Elution from: 38.196 to 38.196 scan no 3262 cid35.00 polarity:+:MA10:m1s

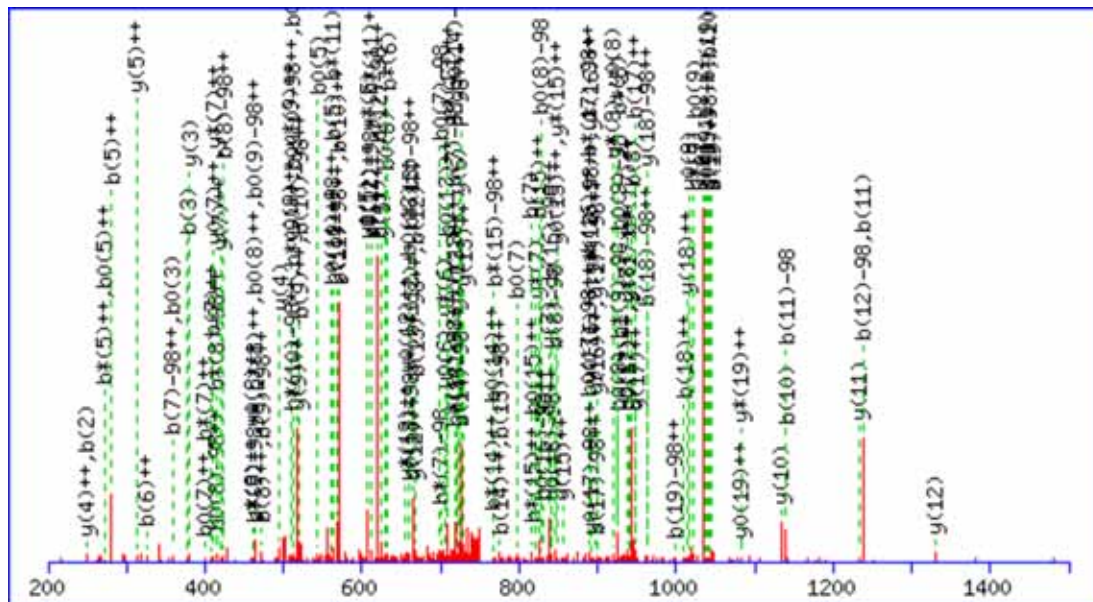

**Monoisotopic mass of neutral peptide Mr(calc):** 2271.1420

**Fixed modifications:** Carbamidomethyl (C) (apply to specified residues or termini only)

**Variable modifications:**

**N-term :** Dimethyl:2H(4)13C(2) (N-term)

**S7 :** Phospho (ST), with neutral losses 97.9769(shown in table), 0.0000

**K20 :** Dimethyl:2H(4)13C(2) (K)

**Ions Score:** 47 **Expect:** 0.0015

**Matched b ions:** b(2), b(3), b(5)++, b(5), b(6)++, b(7)-98, b(7)-98++, b(7)++, b(7), b(8), b(8)-98, b(8)++, b(8)-98++, b(9)-98++, b(9)++, b(9), b(10)++, b(10), b(10)-98++, b(10)-98, b(11)-98++, b(11)++, b(11), b(11)-98, b(12)-98++, b(12)-98, b(12)++, b(13)++, b(13)-98++, b(14)-98++, b(14)++, b(15)++, b(15)-98++, b(16)++, b(16)-98++, b(17)++, b(17)-98++, b(18)-98++, b(18)++, b(19)++, b(19)-98++

**Matched y ions:** y(3), y(4), y(4)++, y(5)++, y(5), y(6), y(7), y(7)++, y(8), y(9), y(9)++, y(10), y(10)++, y(11), y(12), y(12)++, y(13)++, y(15)++, y(16)++, y(17)-98++, y(17)++, y(18)-98++, y(18)++, y(19)-98++

**Precursor origin neutral loss:** +

## Peptide No.337

**GSAEGSSDEEGKLVIDEPAK**

**Confirmed sites:** @S:6,@S:7

**Ambiguous sites:**

MS/MS Fragmentation of **GSAEGSSDEEGKLVIDEPAK**

Found in **HDGF\_MOUSE**, Hepatoma-derived growth factor OS=Mus musculus GN=HdGF PE=1 SV=2

Match to Query 5467: 2260.977532 from(1131.496042,2+)

Title: Elution from: 41.449 to 41.449 scan no 3553 cid35.00 polarity:+:MA10:m1s



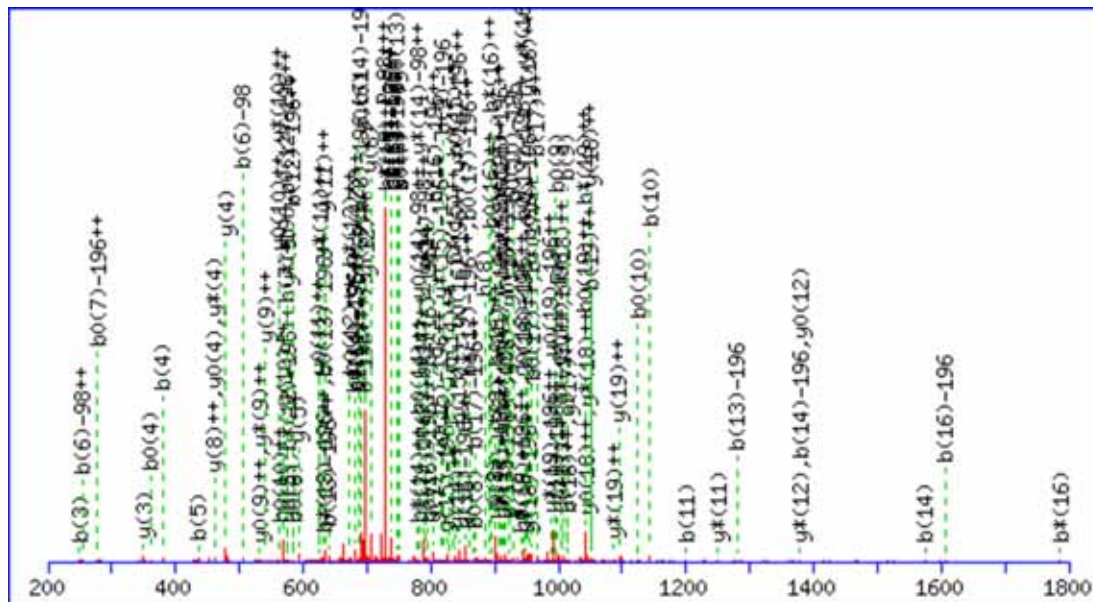

**Monoisotopic mass of neutral peptide Mr(calc):** 2279.0707

**Fixed modifications:** Carbamidomethyl (C) (apply to specified residues or termini only)

**Variable modifications:**

**N-term :** Dimethyl:2H(4)13C(2) (N-term)

**S6 :** Phospho (ST), with neutral losses 97.9769(shown in table), 0.0000

**S7 :** Phospho (ST), with neutral losses 97.9769(shown in table), 0.0000

**K12 :** Dimethyl:2H(4)13C(2) (K)

**K20 :** Dimethyl:2H(4)13C(2) (K)

**Ions Score:** 38 **Expect:** 0.012

**Matched b ions:** b(3), b(4), b(5), b(6)-98, b(6)-98++, b(7)-196, b(7)-98, b(8)-98, b(8)-196, b(8), b(9)-196, b(9)-98, b(9), b(10), b(10)-98, b(10)-196, b(11), b(11)-98++, b(11)-196, b(11)-98, b(12)-98++, b(12)-196++, b(12)++, b(13)-98++, b(13)-196, b(13)-98, b(13)-196++, b(13)++, b(14)++, b(14)-196++, b(14)-196, b(14), b(14)-98++, b(15)++, b(15)-196++, b(15)-98++, b(16)++, b(16)-196, b(16)-98++, b(16)-196++, b(17)-98++, b(17)++, b(17)-196++, b(18)-196++, b(18)-98++, b(18)++, b(19)-196++, b(19)++, b(19)-98++

**Matched y ions:** y(3), y(4), y(5), y(6), y(7), y(8)++, y(8), y(9)++, y(10)++, y(11)++, y(12)++, y(14)++, y(14)-98++, y(15)-196++, y(15)-98++, y(15)++, y(16)-98++, y(16)-196++, y(16)++, y(17)-196++, y(17)-98++, y(17)++, y(18)++, y(18)-196++, y(18)-98++, y(19)++, y(19)-196++, y(19)-98++

**Precursor origin neutral loss:** +

## Peptide No.339

**GSGTASDDEFENLR**

**Confirmed sites:** @S:6

**Ambiguous sites:**

MS/MS Fragmentation of **GSGTASDDEFENLR**

Found in **HUWE1\_MOUSE**, E3 ubiquitin-protein ligase HUWE1 OS=Mus musculus GN=Huwe1 PE=1 SV=4

Match to Query 3129: 1604.637370 from(803.325961,2+)



Title: Elution from: 41.384 to 41.384 scan no 3848 cid35.00 polarity:+:MA10

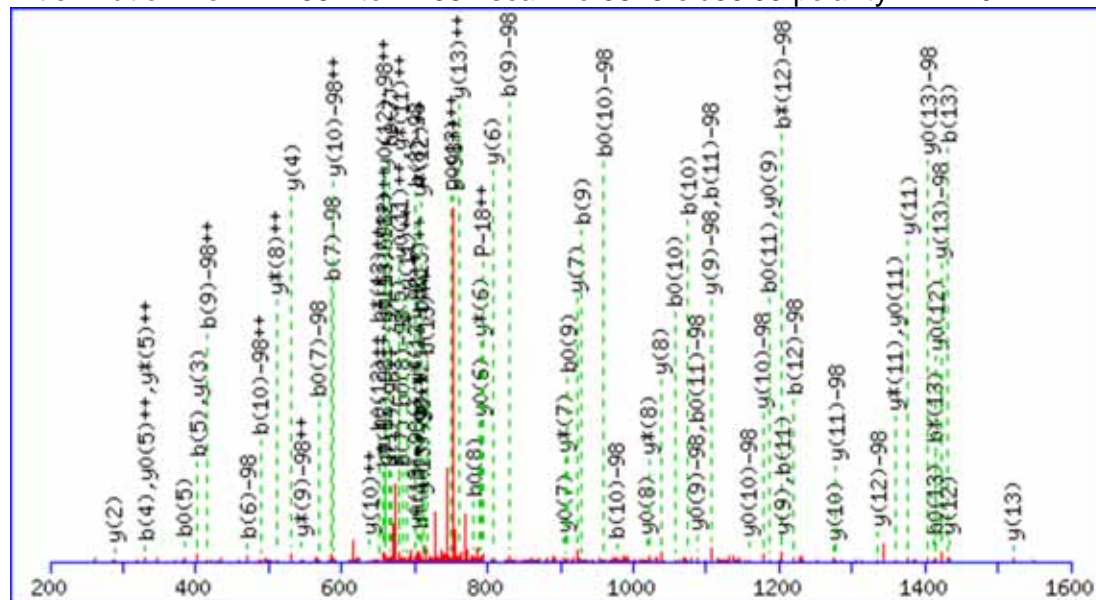

**Monoisotopic mass of neutral peptide Mr(calc):** 1604.6355

**Fixed modifications:** Carbamidomethyl (C) (apply to specified residues or termini only)

**Variable modifications:**

**N-term :** Dimethyl (N-term)

**S6 :** Phospho (ST), with neutral losses 97.9769(shown in table), 0.0000

**Ions Score:** 37 **Expect:** 0.0034

**Matched b ions:** b(4), b(5), b(6)-98, b(7)-98, b(7), b(8)-98, b(9)-98++, b(9)-98, b(9), b(10)-98, b(10)-98++, b(10), b(11)-98, b(11), b(12)-98, b(12)++, b(13), b(13)++

**Matched y ions:** y(2), y(3), y(4), y(5), y(6), y(7), y(8), y(9)-98, y(9), y(10)-98, y(10), y(10)-98++, y(10)++, y(11)-98, y(11), y(11)++, y(12)-98, y(12), y(12)-98++, y(13)-98, y(13), y(13)-98++, y(13)++

**Precursor origin neutral loss:** +

## Peptide No.340

**GSGTASDDEFENLR**

**Confirmed sites:** @S:6

**Ambiguous sites:**

**MS/MS Fragmentation of GSGTASDDEFENLR**

Found in **HUWE1\_MOUSE**, E3 ubiquitin-protein ligase HUWE1 OS=Mus musculus GN=Huwe1 PE=1 SV=4

Match to Query 2107: 1610.667764 from(806.341158,2+)

Title: Elution from: 41.089 to 41.089 scan no 3506 cid35.00 polarity:+:MA10

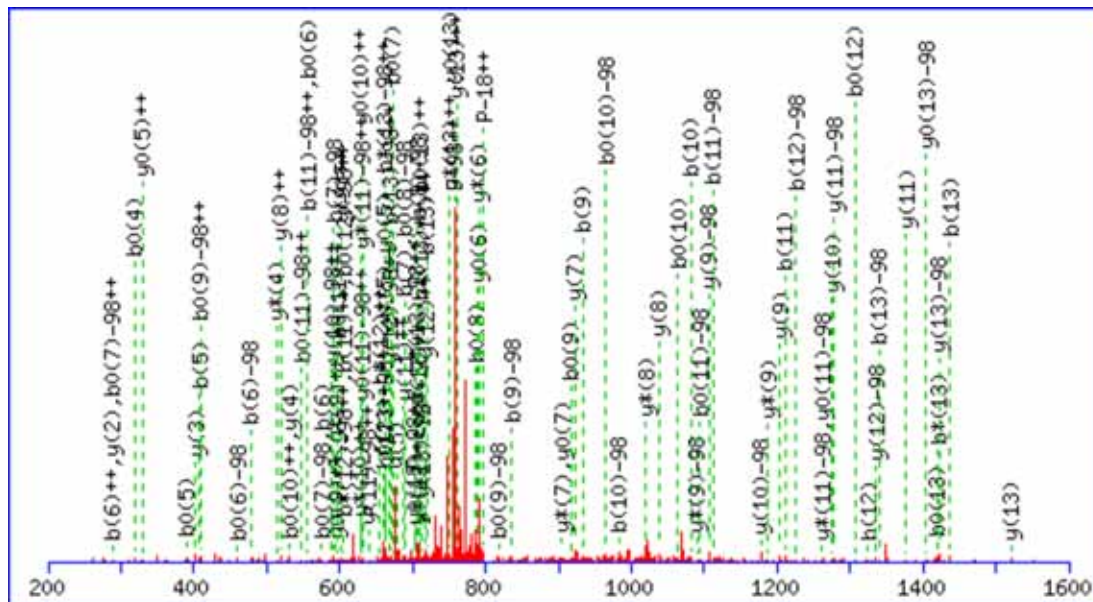

**Monoisotopic mass of neutral peptide Mr(calc):** 1610.6674

**Fixed modifications:** Carbamidomethyl (C) (apply to specified residues or termini only)

**Variable modifications:**

**N-term :** Dimethyl:2H(4)13C(2) (N-term)

**S6 :** Phospho (ST), with neutral losses 97.9769(shown in table), 0.0000

**Ions Score:** 35 **Expect:** 0.0082

**Matched b ions:** b(5), b(6)-98, b(6)++, b(6), b(7)-98, b(7), b(8)-98, b(9), b(9)-98, b(10)-98, b(10), b(11), b(11)-98, b(11)++, b(11)-98, b(11)++, b(12)-98, b(12)++, b(12), b(13), b(13)-98, b(13)++, b(13)++, b(13)-98

**Matched y ions:** y(2), y(3), y(4), y(5), y(7), y(8)++, y(8), y(9), y(9)-98, y(9)++, y(10)-98, y(10)-98, y(10)++, y(11)-98, y(11), y(11)-98, y(11)++, y(12)-98, y(12)-98, y(12)++, y(13)-98, y(13), y(13)-98, y(13)++

**Precursor origin neutral loss:** +

## Peptide No.341

**GSLSDLGEDR**

**Confirmed sites:** @S:2

**Ambiguous sites:**

**MS/MS Fragmentation of** **GSLSDLGEDR**

Found in **CMYA5\_MOUSE**, Cardiomyopathy-associated protein 5 OS=Mus musculus GN=Cmya5 PE=1 SV=2

Match to Query 1033: 1155.481874 from(578.748213,2+)

Title: Elution from: 35.494 to 35.494 scan no 3056 cid35.00 polarity:+:MA10

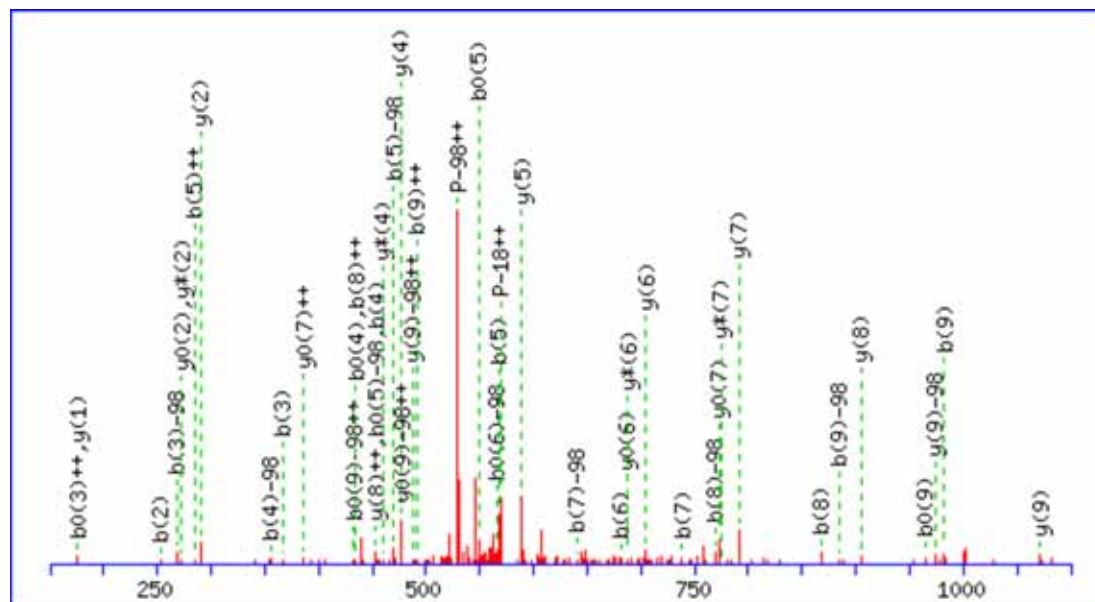

**Monoisotopic mass of neutral peptide Mr(calc):** 1155.4809

**Fixed modifications:** Carbamidomethyl (C) (apply to specified residues or termini only)

**Variable modifications:**

**N-term :** Dimethyl (N-term)

**S2 :** Phospho (ST), with neutral losses 97.9769(shown in table), 0.0000

**Ions Score:** 39 **Expect:** 0.0022

**Matched b ions:** b(2), b(3)-98, b(3), b(4)-98, b(4), b(5)-98, b(5), b(5)++, b(6), b(7)-98, b(7), b(8), b(8)-98, b(8)++, b(9)-98, b(9), b(9)++

**Matched y ions:** y(1), y(2), y(4), y(5), y(6), y(7), y(8), y(8)++, y(9)-98, y(9), y(9)-98++

**Precursor origin neutral loss:** +

## Peptide No.342

**GSSQREFNGLGDCLTK**

**Confirmed sites:**

**Ambiguous sites:** @S:2orS:3

MS/MS Fragmentation of **GSSQREFNGLGDCLTK**

Found in **ADT1\_MOUSE**, ADP/ATP translocase 1 OS=Mus musculus GN=Slc25a4 PE=1 SV=4

Match to Query 3990: 1915.911951 from(639.644593,3+)

Title: Elution from: 42.066 to 42.066 scan no 3632 cid35.00 polarity:+:MA10:m1s





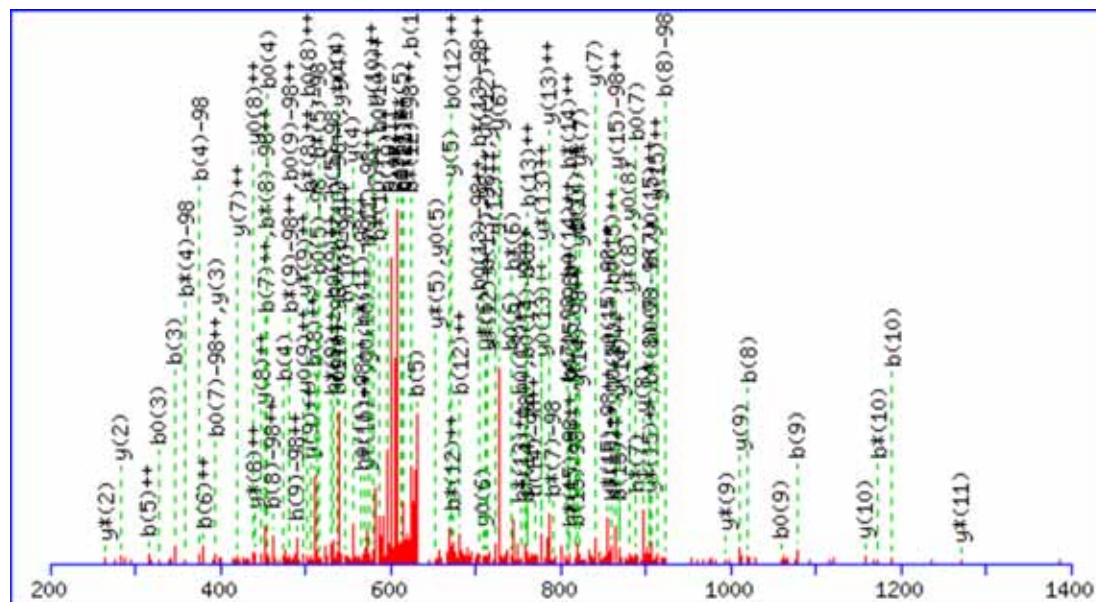

**Monoisotopic mass of neutral peptide Mr(calc):** 1915.9135

**Fixed modifications:** Carbamidomethyl (C) (apply to specified residues or termini only)

**Variable modifications:**

**N-term :** Dimethyl:2H(4)13C(2) (N-term)

**S3 :** Phospho (ST), with neutral losses 0.0000(shown in table), 97.9769

**K16 :** Dimethyl:2H(4)13C(2) (K)

**Ions Score:** 42 **Expect:** 0.004

**Matched b ions:** b(3), b(4)-98, b(4), b(5)++, b(5), b(5)-98, b(6)++, b(6), b(7)++, b(7), b(7)-98, b(8)-98++, b(8)++, b(8), b(8)-98, b(9)++, b(9), b(9)-98++, b(10), b(10)++, b(10)-98++, b(11)++, b(11)-98++, b(12)++, b(13)-98++, b(13)++, b(14)-98++, b(14)++, b(15)++, b(15)-98++

**Matched y ions:** y(2), y(3), y(4), y(5), y(6), y(7), y(7)++, y(8), y(8)++, y(9), y(9)++, y(10), y(10)++, y(12)++, y(13)++, y(14)++, y(14)-98++, y(15)-98++, y(15)++

**Precursor origin neutral loss:** +

## Peptide No.344

**GSTELVPGAR**

**Confirmed sites:** @S:2

**Ambiguous sites:**

**MS/MS Fragmentation of GSTELVPGAR**

Found in **TITIN\_MOUSE**, Titin OS=Mus musculus GN=Ttn PE=1 SV=1

Match to Query 743: 1093.517436 from(547.765994,2+)

Title: Elution from: 31.800 to 31.800 scan no 2552 cid35.00 polarity:+:MA10

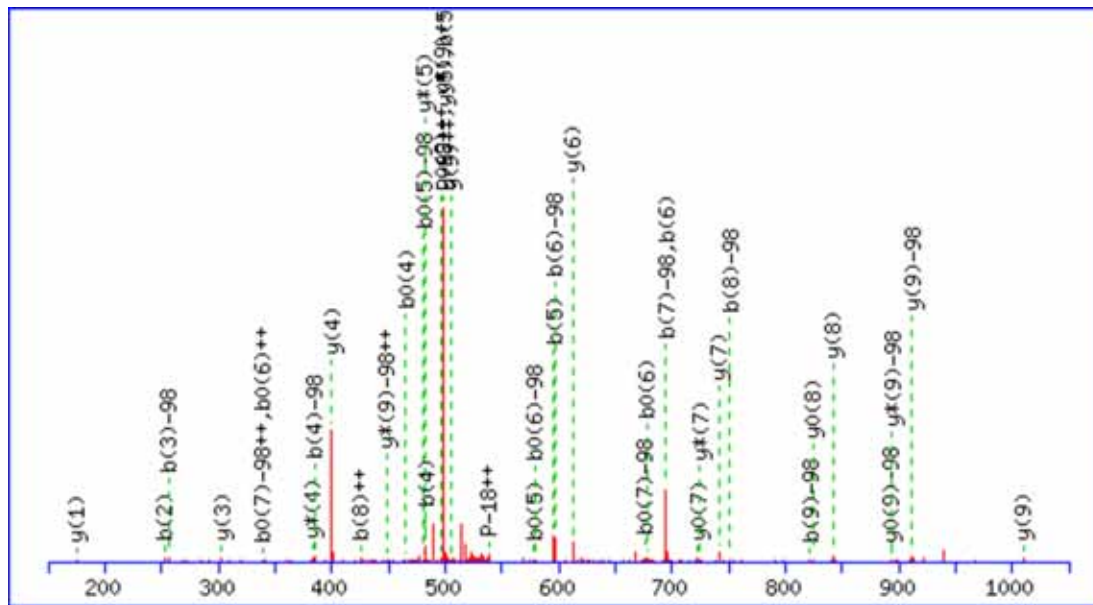

**Monoisotopic mass of neutral peptide Mr(calc):** 1093.5169

**Fixed modifications:** Carbamidomethyl (C) (apply to specified residues or termini only)

**Variable modifications:**

**N-term :** Dimethyl (N-term)

**S2 :** Phospho (ST), with neutral losses 97.9769(shown in table), 0.0000

**Ions Score:** 61 **Expect:** 1.8e-005

**Matched b ions:** b(2), b(3)-98, b(4)-98, b(4), b(5)-98, b(5), b(6), b(6)-98, b(7)-98, b(8)++, b(8)-98, b(9)-98

**Matched y ions:** y(1), y(3), y(4), y(5), y(6), y(7), y(8), y(9), y(9)-98, y(9)++

**Precursor origin neutral loss:** +

## Peptide No.345

**GSTELVPGAR**

**Confirmed sites:** @S:2

**Ambiguous sites:**

**MS/MS Fragmentation of** **GSTELVPGAR**

Found in **TITIN\_MOUSE**, Titin OS=Mus musculus GN=Ttn PE=1 SV=1

Match to Query 627: 1099.548838 from(550.781695,2+)

Title: Elution from: 31.492 to 31.492 scan no 2312 cid35.00 polarity:+:MA10

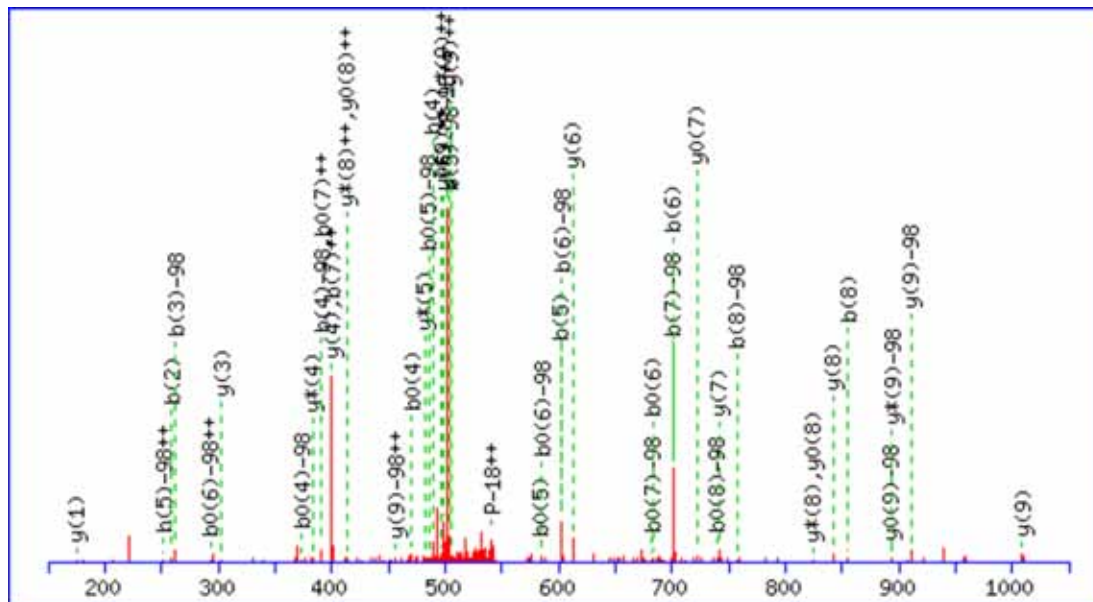

**Monoisotopic mass of neutral peptide Mr(calc):** 1099.5487

**Fixed modifications:** Carbamidomethyl (C) (apply to specified residues or termini only)

**Variable modifications:**

**N-term :** Dimethyl:2H(4)13C(2) (N-term)

**S2 :** Phospho (ST), with neutral losses 97.9769(shown in table), 0.0000

**Ions Score:** 44 **Expect:** 0.00098

**Matched b ions:** b(2), b(3)-98, b(4)-98, b(4), b(5), b(5)-98++, b(5)-98, b(6), b(6)-98, b(7)++, b(7)-98, b(8), b(8)-98

**Matched y ions:** y(1), y(3), y(4), y(5), y(6), y(7), y(8), y(9), y(9)-98, y(9)-98++, y(9)++

**Precursor origin neutral loss:** +

## Peptide No.346

**GWL RDPNASPGDAGEQAIR**

**Confirmed sites:** @S:9

**Ambiguous sites:**

**MS/MS Fragmentation of** **GWL RDPNASPGDAGEQAIR**

Found in **VINC\_MOUSE**, Vinculin OS=Mus musculus GN=Vcl PE=1 SV=4

Match to Query 6222: 2116.972338 from(706.664722,3+)

Title: Elution from: 42.393 to 42.393 scan no 3978 cid35.00 polarity:+:MA10:m1s

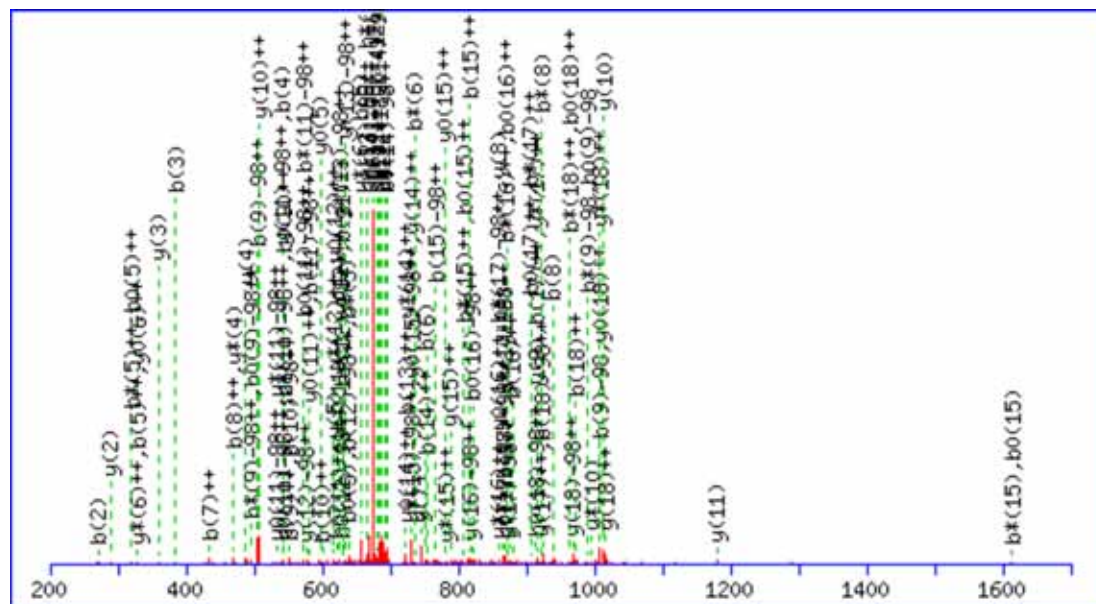

**Monoisotopic mass of neutral peptide Mr(calc):** 2116.9691

**Fixed modifications:** Carbamidomethyl (C) (apply to specified residues or termini only)

**Variable modifications:**

**N-term :** Dimethyl (N-term)

**S9 :** Phospho (ST), with neutral losses 97.9769(shown in table), 0.0000

**Ions Score:** 63 **Expect:** 3.3e-005

**Matched b ions:** b(2), b(3), b(4), b(5)++, b(5), b(6), b(7), b(7)++, b(8)++, b(8), b(9)-98, b(9)-98++, b(9)++, b(10)-98++, b(10)++, b(11)-98++, b(11)++, b(12)++, b(12)-98++, b(13)-98++, b(13)++, b(14)++, b(15)++, b(15)-98++, b(16)++, b(17)-98++, b(17)++, b(18)-98++, b(18)++

**Matched y ions:** y(2), y(3), y(4), y(5), y(6), y(7), y(8), y(9), y(10)++, y(10), y(11), y(11)-98++, y(12)-98++, y(12)++, y(13)++, y(13)-98++, y(14)++, y(14)-98++, y(15)++, y(16)++, y(16)-98++, y(17)++, y(17)-98++, y(18)-98++, y(18)++

**Precursor origin neutral loss:** +

## Peptide No.347

**GWSPPEVR**

**Confirmed sites:** @S:3

**Ambiguous sites:**

**MS/MS Fragmentation of** **GWSPPEVR**

Found in **ACSA\_MOUSE**, Acetyl-coenzyme A synthetase, cytoplasmic OS=Mus musculus GN=Acss2 PE=1 SV=1

Match to Query 829: 1131.511600 from(566.763076,2+)

Title: Elution from: 42.005 to 42.005 scan no 3774 cid35.00 polarity:+:MA10



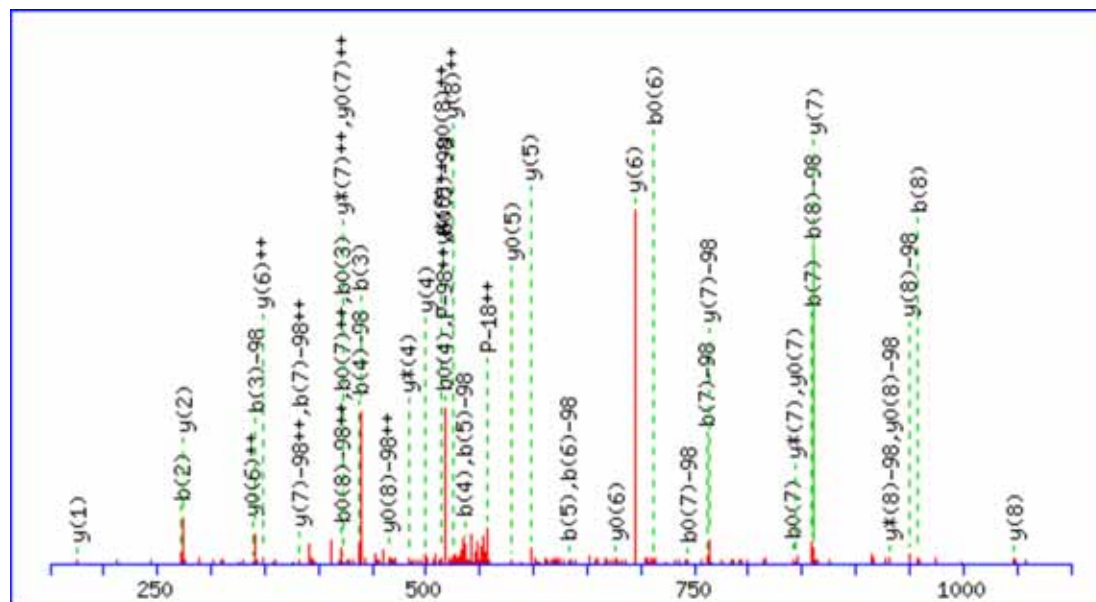

**Monoisotopic mass of neutral peptide Mr(calc):** 1131.5114

**Fixed modifications:** Carbamidomethyl (C) (apply to specified residues or termini only)

**Variable modifications:**

**N-term :** Dimethyl (N-term)

**S3 :** Phospho (ST), with neutral losses 0.0000(shown in table), 97.9769

**Ions Score:** 29 **Expect:** 0.022

**Matched b ions:** b(2), b(3)-98, b(3), b(4)-98, b(4), b(5)-98, b(5), b(6)-98, b(7), b(7)-98, b(7)-98++, b(8), b(8)-98

**Matched y ions:** y(1), y(2), y(4), y(5), y(6), y(6)++, y(7), y(7)-98, y(7)-98++, y(8), y(8)-98, y(8)++

**Precursor origin neutral loss:** +

## Peptide No.348

**GWSPPEVR**

**Confirmed sites:** @S:3

**Ambiguous sites:**

**MS/MS Fragmentation of** **GWSPPEVR**

Found in **ACSA\_MOUSE**, Acetyl-coenzyme A synthetase, cytoplasmic OS=Mus musculus GN=Acss2  
PE=1 SV=1

**Match to Query 775:** 1137.543390 from(569.778971,2+)

**Title:** Elution from: 41.905 to 41.905 scan no 3652 cid35.00 polarity:+:MA10

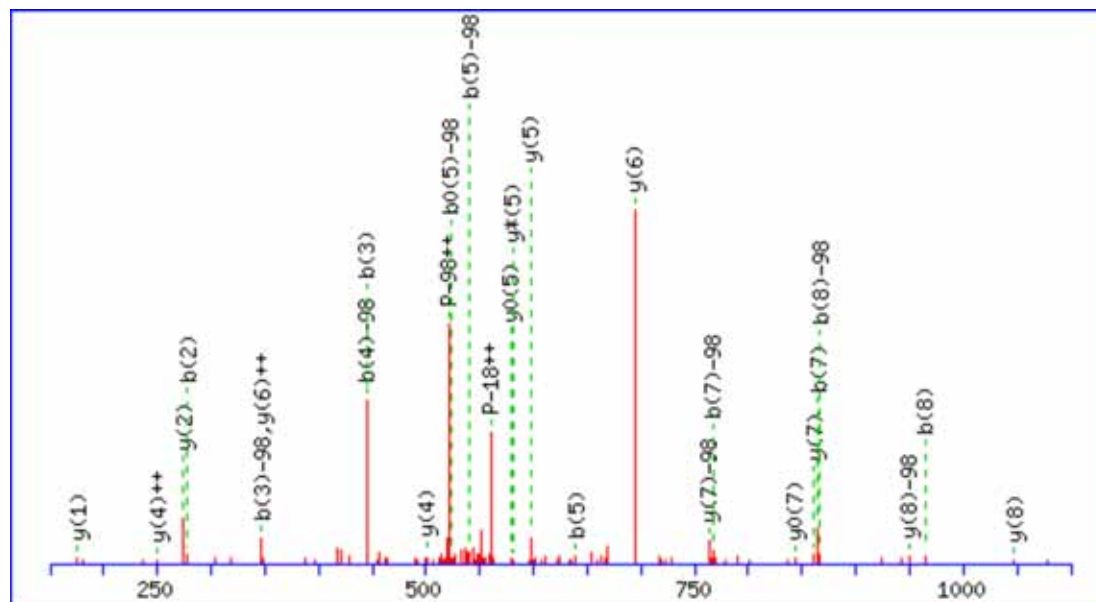

**Monoisotopic mass of neutral peptide Mr(calc):** 1137.5432

**Fixed modifications:** Carbamidomethyl (C) (apply to specified residues or termini only)

**Variable modifications:**

**N-term :** Dimethyl:2H(4)13C(2) (N-term)

**S3 :** Phospho (ST), with neutral losses 97.9769(shown in table), 0.0000

**Ions Score:** 41 **Expect:** 0.0021

**Matched b ions:** b(2), b(3)-98, b(3), b(4)-98, b(5), b(5)-98, b(7), b(7)-98, b(8), b(8)-98

**Matched y ions:** y(1), y(2), y(4)++, y(4), y(5), y(6)++, y(6), y(7), y(7)-98, y(8), y(8)-98

**Precursor origin neutral loss:** +

## Peptide No.349

**GYSFVTTAER**

**Confirmed sites:** @T:7

**Ambiguous sites:**

MS/MS Fragmentation of **GYSFVTTAER**

Found in **ACTS\_MOUSE**, Actin, alpha skeletal muscle OS=Mus musculus GN=Acta1 PE=1 SV=1

Match to Query 1360: 1237.539128 from(619.776840,2+)

Title: Elution from: 39.998 to 39.998 scan no 3665 cid35.00 polarity:+:MA10:m1s

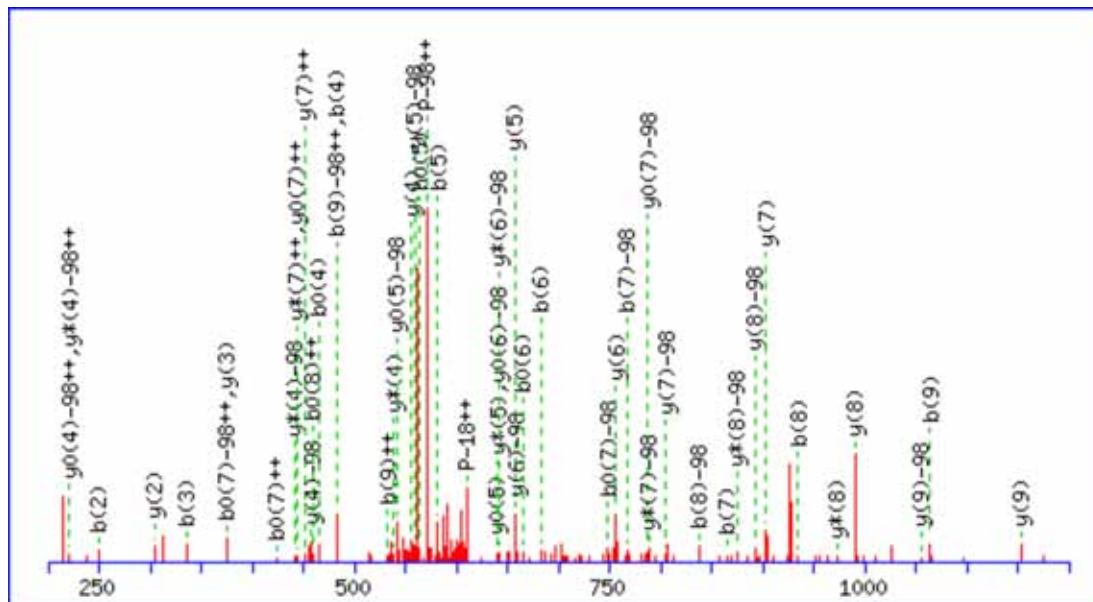

**Monoisotopic mass of neutral peptide Mr(calc):** 1237.5380

**Fixed modifications:** Carbamidomethyl (C) (apply to specified residues or termini only)

**Variable modifications:**

**N-term :** Dimethyl (N-term)

**T7 :** Phospho (ST), with neutral losses 0.0000(shown in table), 97.9769

**Ions Score:** 45 **Expect:** 0.00056

**Matched b ions:** b(2), b(3), b(4), b(5), b(6), b(7)-98, b(7), b(8)-98, b(8), b(9)-98, b(9)++

**Matched y ions:** y(2), y(3), y(4)-98, y(4), y(5), y(5)-98, y(6), y(6)-98, y(7), y(7)++, y(7)-98, y(8), y(8)-98, y(9), y(9)-98

**Precursor origin neutral loss:** +

## Peptide No.350

**GYYPYSVSGSGSTAGSR**

**Confirmed sites:** @S:11

**Ambiguous sites:**

**MS/MS Fragmentation of GYYPYSVSGSGSTAGSR**

Found in **PLEC\_MOUSE**, Plectin OS=Mus musculus GN=Plec PE=1 SV=2

Match to Query 4333: 1889.783610 from(945.899081,2+)

Title: Elution from: 39.266 to 39.266 scan no 3373 cid35.00 polarity:+:MA10

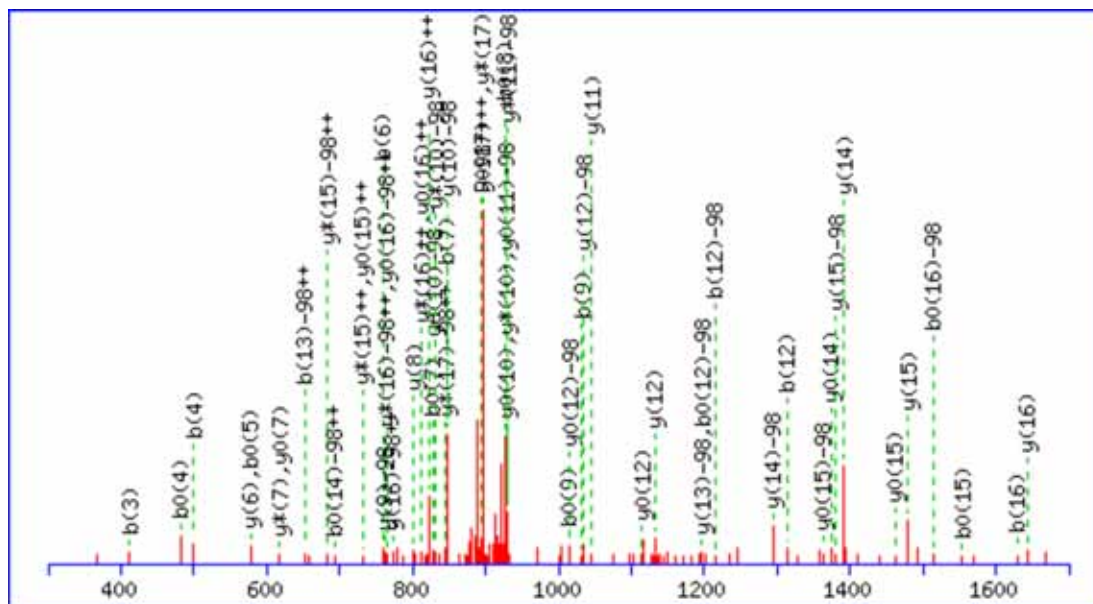

**Monoisotopic mass of neutral peptide Mr(calc):** 1889.7833

**Fixed modifications:** Carbamidomethyl (C) (apply to specified residues or termini only)

**Variable modifications:**

**N-term :** Dimethyl (N-term)

**S11 :** Phospho (ST), with neutral losses 97.9769(shown in table), 0.0000

**Ions Score:** 32 **Expect:** 0.022

**Matched b ions:** b(3), b(4), b(6), b(7), b(9), b(12), b(12)-98, b(13)-98++, b(16)

**Matched y ions:** y(6), y(8), y(9)-98, y(10)-98, y(11), y(12)-98, y(12), y(13)-98, y(14)-98, y(14), y(15), y(15)-98, y(16), y(16)++, y(16)-98++

**Precursor origin neutral loss:** +

## Peptide No.351

**GYYPYSVSGSGSTAGSR**

**Confirmed sites:** @Y:3,@S:11

**Ambiguous sites:**

**MS/MS Fragmentation of** **GYYPYSVSGSGSTAGSR**

Found in **PLEC\_MOUSE**, Plectin OS=Mus musculus GN=Plec PE=1 SV=2

Match to Query 5472: 1969.750318 from(985.882435,2+)

Title: Elution from: 42.008 to 42.008 scan no 3931 cid35.00 polarity:+:MA10:m1s



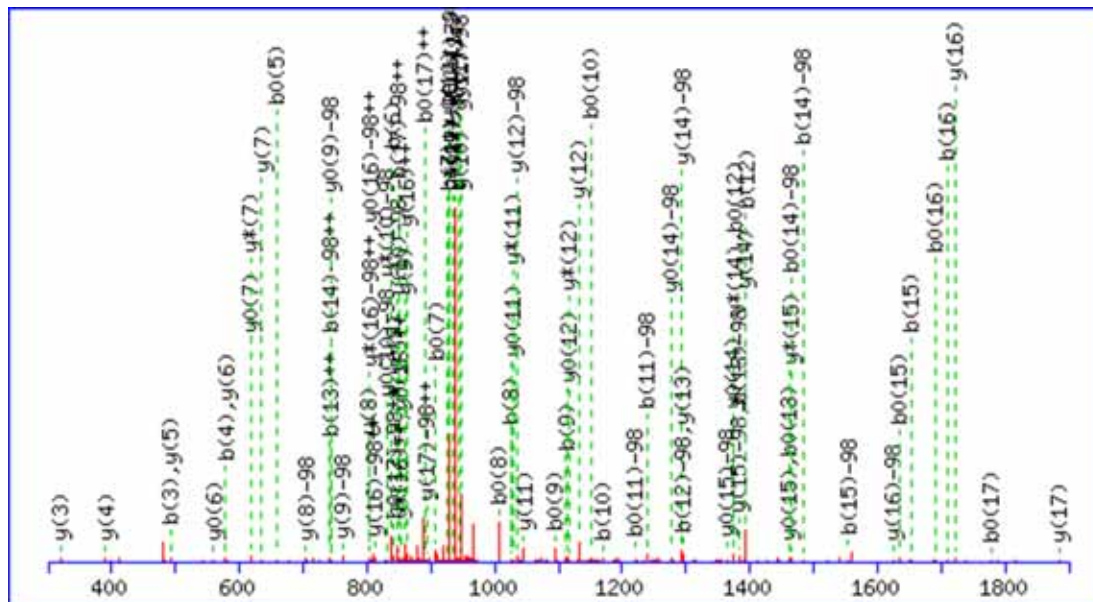

**Monoisotopic mass of neutral peptide Mr(calc):** 1969.7496

**Fixed modifications:** Carbamidomethyl (C) (apply to specified residues or termini only)

**Variable modifications:**

**N-term :** Dimethyl (N-term)

**Y3 :** Phospho (Y)

**S11 :** Phospho (ST), with neutral losses 0.0000(shown in table), 97.9769

**Ions Score:** 90 **Expect:** 2e-008

**Matched b ions:** b(3), b(4), b(6), b(7), b(8), b(9), b(10), b(11)-98, b(12)-98, b(12), b(13)-98, b(13)+, b(14)-98, b(14)-98+, b(15), b(15)-98, b(16), b(17)-98++

**Matched y ions:** y(3), y(4), y(5), y(6), y(7), y(8)-98, y(8), y(9)-98, y(9), y(10), y(10)-98, y(11), y(11)-98, y(12), y(12)-98, y(13), y(14)-98, y(14), y(15)-98, y(16), y(16)-98, y(16)-98++, y(16)+, y(17), y(17)-98++, y(17)++

**Precursor origin neutral loss:** +

## Peptide No.352

**GYYPYSVSGSGSTAGSR**

**Confirmed sites:** @Y:6,@S:11

**Ambiguous sites:**

**MS/MS Fragmentation of GYYPSVSGSGSTAGSR**

Found in **PLEC\_MOUSE**, Plectin OS=Mus musculus GN=Plec PE=1 SV=2

Match to Query 6363: 1969.750612 from(985.882582,2+)

Title: Elution from: 41.791 to 41.791 scan no 3889 cid35.00 polarity:+:MA10:m1s

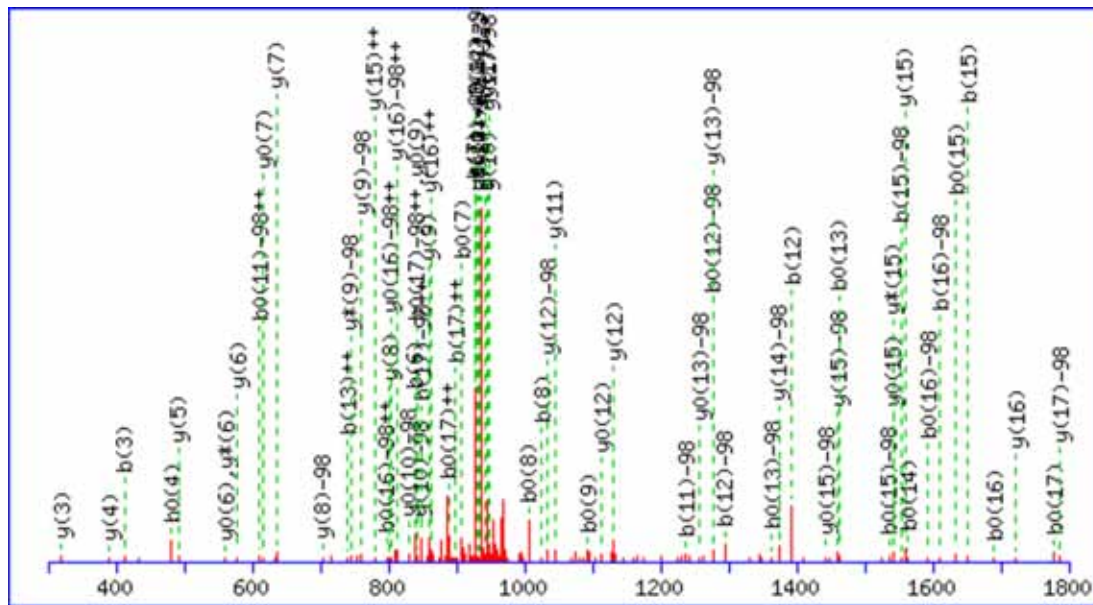

**Monoisotopic mass of neutral peptide Mr(calc):** 1969.7496

**Fixed modifications:** Carbamidomethyl (C) (apply to specified residues or termini only)

**Variable modifications:**

**N-term :** Dimethyl (N-term)

**Y6 :** Phospho (Y)

**S11 :** Phospho (ST), with neutral losses 97.9769(shown in table), 0.0000

**Ions Score:** 66 **Expect:** 4.2e-006

**Matched b ions:** b(3), b(6), b(7), b(8), b(11)-98, b(12)-98, b(12), b(13)++, b(15), b(15)-98, b(16)-98, b(17)-98++, b(17)++

**Matched y ions:** y(3), y(4), y(5), y(6), y(7), y(8)-98, y(8), y(9)-98, y(9), y(10), y(10)-98, y(11), y(11)-98, y(12), y(12)-98, y(13)-98, y(14)-98, y(15)-98, y(15), y(15)++, y(16)-98++, y(16), y(16)++, y(17)-98, y(17)++

**Precursor origin neutral loss:** +

## Peptide No.353

**GYYPYSVSGSGSTAGSR**

**Confirmed sites:** @S:13

**Ambiguous sites:**

MS/MS Fragmentation of **GYYPYSVSGSGSTAGSR**

Found in **PLEC\_MOUSE**, Plectin OS=Mus musculus GN=Plec PE=1 SV=2

Match to Query 4166: 1889.784782 from(945.899667,2+)

Title: Elution from: 39.319 to 39.319 scan no 3363 cid35.00 polarity:+:MA10:m1s



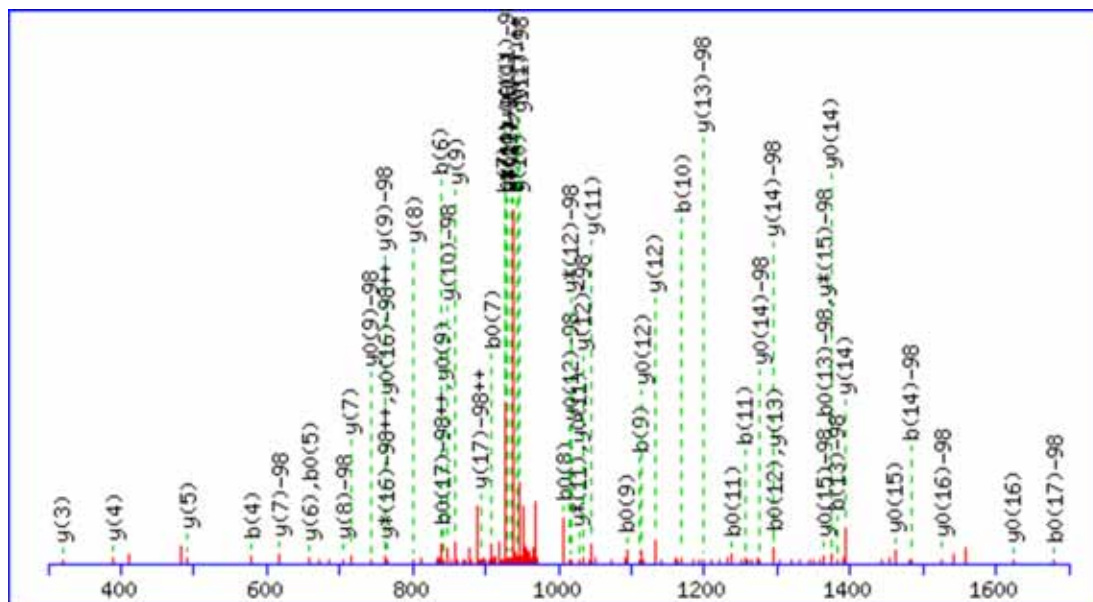

**Monoisotopic mass of neutral peptide Mr(calc):** 1969.7496

**Fixed modifications:** Carbamidomethyl (C) (apply to specified residues or termini only)

**Variable modifications:**

**N-term :** Dimethyl (N-term)

**Y2 :** Phospho (Y)

**S13 :** Phospho (ST), with neutral losses 0.0000(shown in table), 97.9769

**Ions Score:** 69 **Expect:** 2e-006

**Matched b ions:** b(4), b(6), b(7), b(9), b(10), b(11), b(13)-98, b(14)-98

**Matched y ions:** y(3), y(4), y(5), y(6), y(7)-98, y(7), y(8)-98, y(8), y(9)-98, y(9), y(10), y(10)-98, y(11), y(11)-98, y(12), y(12)-98, y(13), y(13)-98, y(14)-98, y(14), y(17)-98++, y(17)++

**Precursor origin neutral loss:** +

## Peptide No.355

**GYSPYSVSGSGSTAGSR**

**Confirmed sites:** @Y:6,@S:13

**Ambiguous sites:**

MS/MS Fragmentation of **GYSPYSVSGSGSTAGSR**

Found in **PLEC\_MOUSE**, Plectin OS=Mus musculus GN=Plec PE=1 SV=2

Match to Query 4299: 1969.751248 from(985.882900,2+)

Title: Elution from: 41.819 to 41.819 scan no 3598 cid35.00 polarity:+:MA10:m1s





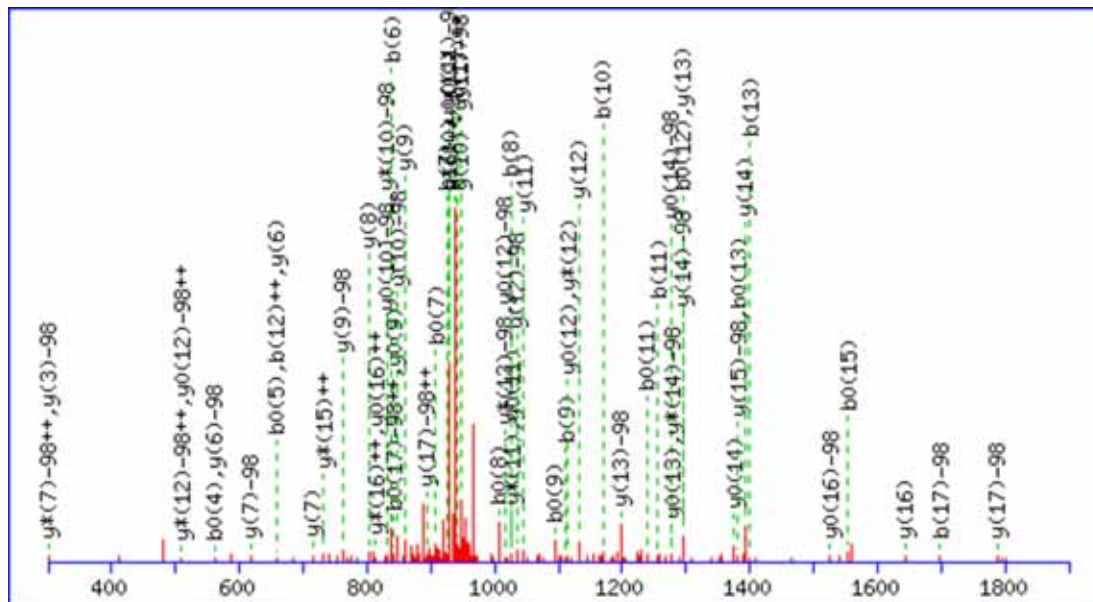

**Monoisotopic mass of neutral peptide Mr(calc):** 1969.7496

**Fixed modifications:** Carbamidomethyl (C) (apply to specified residues or termini only)

**Variable modifications:**

**N-term :** Dimethyl (N-term)

**Y2 :** Phospho (Y)

**S17 :** Phospho (ST), with neutral losses 97.9769(shown in table), 0.0000

**Ions Score:** 43 **Expect:** 0.00084

**Matched b ions:** b(6), b(7), b(8), b(9), b(10), b(11), b(12)++, b(13), b(17)-98

**Matched y ions:** y(3)-98, y(6)-98, y(6), y(7)-98, y(7), y(8), y(9)-98, y(9), y(10)-98, y(10), y(11),

y(11)-98, y(12), y(12)-98, y(13)-98, y(13), y(14)-98, y(14), y(15)-98, y(16), y(17)-98, y(17)-98++, y(17)++

**Precursor origin neutral loss:** +

## Peptide No.357

**GYYPYSVSGSGSTAGSR**

**Confirmed sites:** @Y:3,@S:17

**Ambiguous sites:**

MS/MS Fragmentation of **GYYPYSVSGSGSTAGSR**

Found in **PLEC\_MOUSE**, Plectin OS=Mus musculus GN=Plec PE=1 SV=2

Match to Query 4297: 1969.750608 from(657.590812,3+)

Title: Elution from: 42.110 to 42.110 scan no 3636 cid35.00 polarity:+:MA10

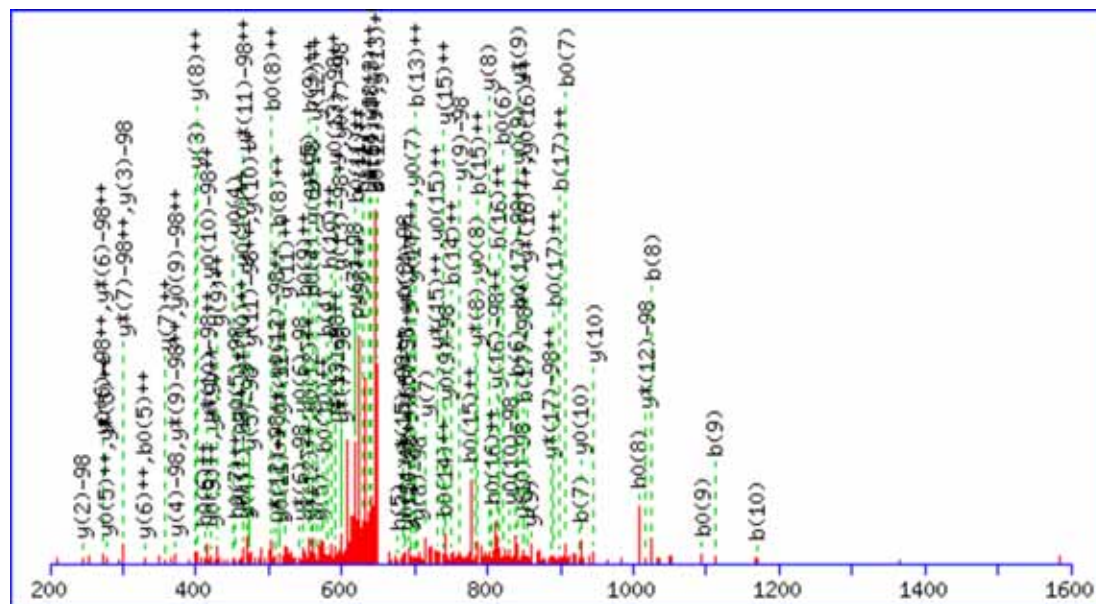

**Monoisotopic mass of neutral peptide Mr(calc):** 1969.7496

**Fixed modifications:** Carbamidomethyl (C) (apply to specified residues or termini only)

**Variable modifications:**

**N-term :** Dimethyl (N-term)

**Y3 :** Phospho (Y)

**S17 :** Phospho (ST), with neutral losses 97.9769(shown in table), 0.0000

**Ions Score:** 26 **Expect:** 0.046

**Matched b ions:** b(4), b(5), b(6), b(7), b(8), b(8)++, b(9), b(9)++, b(10), b(10)++, b(11)++, b(13)++, b(14)++, b(15)++, b(16)++, b(17)-98++, b(17)++

**Matched y ions:** y(2)-98, y(3)-98, y(3), y(4), y(4)-98, y(5), y(5)-98, y(6)-98, y(6)++, y(7), y(7)++, y(7)-98, y(8)++, y(8)-98, y(8), y(9), y(9)++, y(9)-98, y(10), y(10)++, y(10)-98, y(11)-98++, y(11)++, y(12)++, y(13)-98++, y(13)++, y(14)-98++, y(14)++, y(15)-98++, y(15)++, y(16)-98++

**Precursor origin neutral loss:** +

## Peptide No.358

**GYYPYSVSGSGSTAGSR**

**Confirmed sites:** @S:4,@S:17

**Ambiguous sites:**

**MS/MS Fragmentation of GYYPYSVSGSGSTAGSR**

Found in **PLEC\_MOUSE**, Plectin OS=Mus musculus GN=Plec PE=1 SV=2

Match to Query 4845: 1969.747976 from(985.881264,2+)

Title: Elution from: 41.979 to 41.979 scan no 3736 cid35.00 polarity:+:MA10





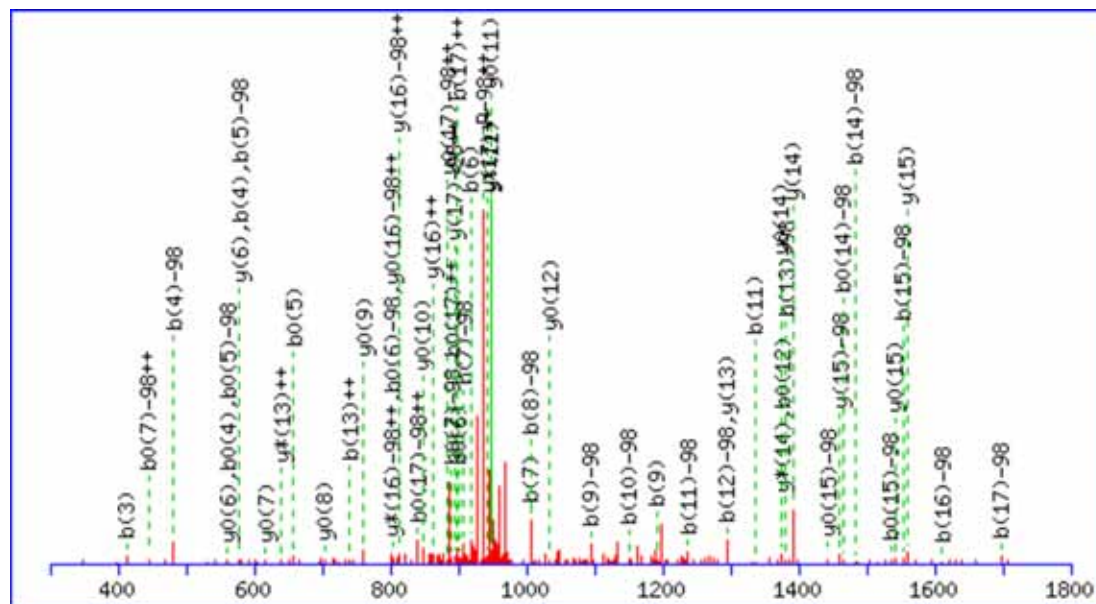

**Monoisotopic mass of neutral peptide Mr(calc):** 1969.7496

**Fixed modifications:** Carbamidomethyl (C) (apply to specified residues or termini only)

**Variable modifications:**

**N-term :** Dimethyl (N-term)

**S4 :** Phospho (ST), with neutral losses 97.9769(shown in table), 0.0000

**Y6 :** Phospho (Y)

**Ions Score:** 45 **Expect:** 0.00061

**Matched b ions:** b(3), b(4)-98, b(4), b(5)-98, b(6), b(7)-98, b(7), b(8)-98, b(9)-98, b(9), b(10)-98, b(11)-98, b(11), b(12)-98, b(13)-98, b(13)++, b(14)-98, b(15)-98, b(16)-98, b(17)-98, b(17)++

**Matched y ions:** y(6), y(13), y(14), y(15)-98, y(15), y(16)-98++, y(16)++, y(17)-98++, y(17)++

**Precursor origin neutral loss:** +

## Peptide No.360

**GYYPYSVSGSGSTAGSR**

**Confirmed sites:** @S:4,@T:14,@S:17

**Ambiguous sites:**

MS/MS Fragmentation of **GYYPYSVSGSGSTAGSR**

Found in **PLEC\_MOUSE**, Plectin OS=Mus musculus GN=Plec PE=1 SV=2

Match to Query 4599: 2049.718464 from(1025.866508,2+)

Title: Elution from: 46.258 to 46.258 scan no 4149 cid35.00 polarity:+:MA10:m1s

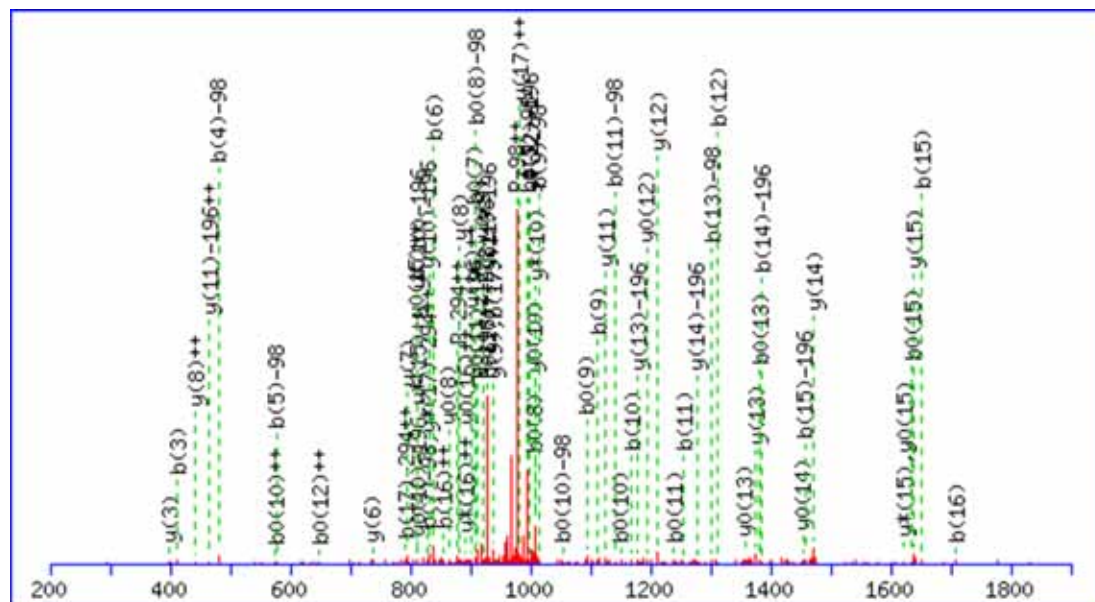

**Monoisotopic mass of neutral peptide Mr(calc):** 2049.7159

**Fixed modifications:** Carbamidomethyl (C) (apply to specified residues or termini only)

**Variable modifications:**

**N-term :** Dimethyl (N-term)

**S4 :** Phospho (ST), with neutral losses 0.0000(shown in table), 97.9769

**T14 :** Phospho (ST), with neutral losses 0.0000(shown in table), 97.9769

**S17 :** Phospho (ST), with neutral losses 0.0000(shown in table), 97.9769

**Ions Score:** 22 **Expect:** 0.046

**Matched b ions:** b(3), b(4)-98, b(5)-98, b(6), b(7)-98, b(8)-98, b(9), b(9)-98, b(10), b(11), b(12), b(13)-98, b(14)-196, b(15), b(15)-98, b(15)-196, b(16), b(16)++, b(17)-98, b(17)-294++, b(17)-196++, b(17)-98++, b(17)++

**Matched y ions:** y(3), y(6)-98, y(6), y(7), y(7)-98, y(8)++, y(8)-98, y(8), y(9)-98, y(9), y(10)-196, y(10)-98, y(11), y(11)-196++, y(11)-196, y(12)-98, y(12), y(13), y(13)-196, y(13)-98, y(14), y(14)-98, y(14)-196, y(15)-98, y(15), y(15)-98++, y(16)-98++, y(16)-196++, y(16)++, y(17)-98++, y(17)++

**Precursor origin neutral loss:** +

## Peptide No.361

**GYYPYSVSGSGSTAGSR**

**Confirmed sites:** @S:7

**Ambiguous sites:**

MS/MS Fragmentation of **GYYPYSVSGSGSTAGSR**

Found in **PLEC\_MOUSE**, Plectin OS=Mus musculus GN=Plec PE=1 SV=2

Match to Query 4995: 1889.784820 from(945.899686,2+)

Title: Elution from: 39.411 to 39.411 scan no 3587 cid35.00 polarity:+:MA10:m1s

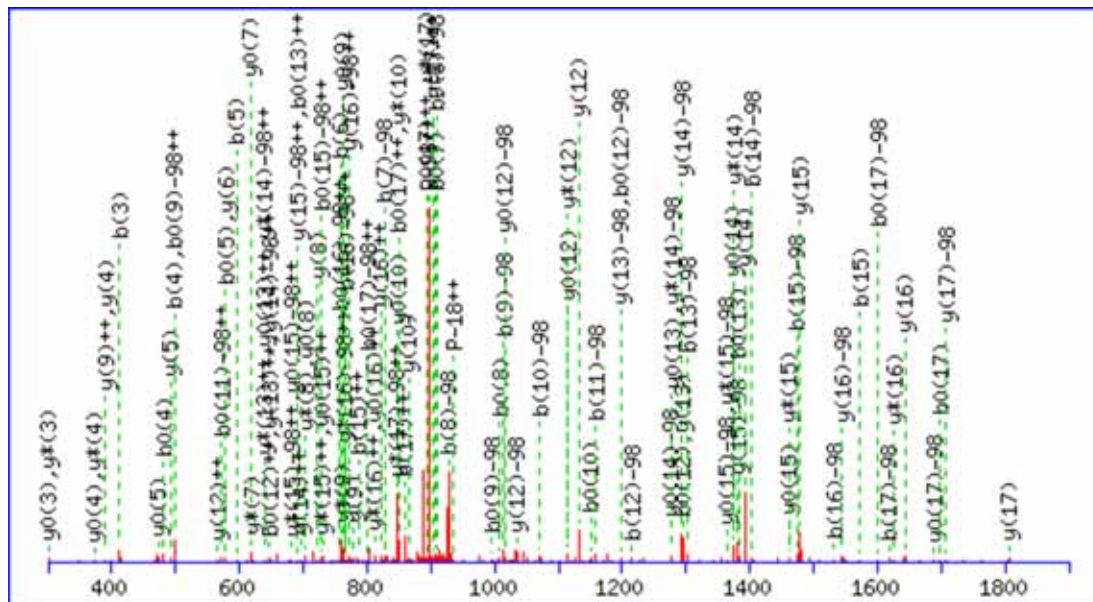

**Monoisotopic mass of neutral peptide Mr(calc): 1889.7833**

**Fixed modifications:** Carbamidomethyl (C) (apply to specified residues or termini only)

**Variable modifications:**

**N-term :** Dimethyl (N-term)

**S7 :** Phospho (ST), with neutral losses 97.9769(shown in table), 0.0000

**Ions Score:** 86 **Expect:** 8.3e-008

**Matched b ions:** b(3), b(4), b(5), b(6), b(7)-98, b(8)-98, b(9)-98, b(10)-98, b(11)-98, b(12)-98, b(13)-98, b(14)-98, b(15)-98, b(15), b(15)++, b(16)-98, b(16)-98++, b(17)-98, b(17)++

**Matched y ions:** y(4), y(5), y(6), y(8), y(9)++, y(9), y(10), y(12), y(12)++, y(12)-98, y(13), y(13)++, y(13)-98, y(14)-98, y(14), y(14)-98++, y(14)++, y(15), y(15)-98, y(15)-98++, y(16)-98, y(16), y(16)-98++, y(16)++, y(17)-98, y(17), y(17)++

**Precursor origin neutral loss:** +

## Peptide No.362

**GYYPYSVSGSGSTAGSR**

**Confirmed sites:** @S:9

**Ambiguous sites:** @Y:2orY:3

**MS/MS Fragmentation of GYYPYSVSGSGSTAGSR**

Found in **PLEC\_MOUSE**, Plectin OS=Mus musculus GN=Plec PE=1 SV=2

Match to Query 5055: 1969.750058 from(985.882305,2+)

Title: Elution from: 41.127 to 41.127 scan no 3656 cid35.00 polarity:+MA10

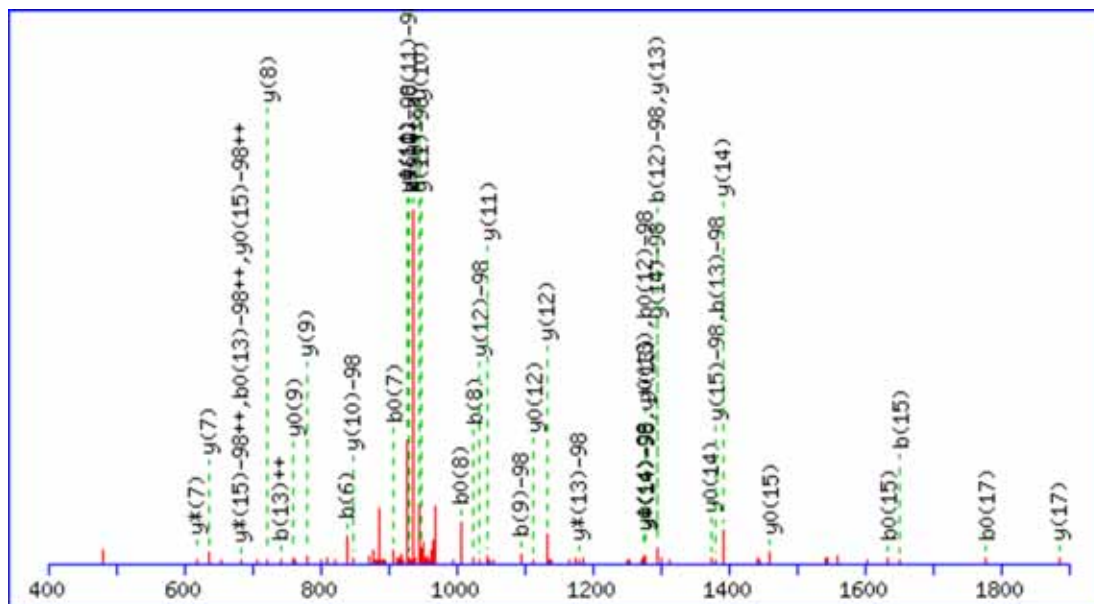

**Monoisotopic mass of neutral peptide Mr(calc):** 1969.7496

**Fixed modifications:** Carbamidomethyl (C) (apply to specified residues or termini only)

**Variable modifications:**

**N-term :** Dimethyl (N-term)

**Y3 :** Phospho (Y)

**S9 :** Phospho (ST), with neutral losses 0.0000(shown in table), 97.9769

**Ions Score:** 37 **Expect:** 0.0034

**Matched b ions:** b(6), b(8), b(9)-98, b(12)-98, b(13)++, b(13)-98, b(15)

**Matched y ions:** y(7), y(8), y(9), y(10), y(10)-98, y(11), y(11)-98, y(12), y(12)-98, y(13), y(14)-98, y(14), y(15)-98, y(17)

**Precursor origin neutral loss:** +

## Peptide No.363

**GYYPYSVSGSGSTAGSR**

**Confirmed sites:** @Y:6,@S:9

**Ambiguous sites:**

MS/MS Fragmentation of **GYYPYSVSGSGSTAGSR**

Found in **PLEC\_MOUSE**, Plectin OS=Mus musculus GN=Plec PE=1 SV=2

Match to Query 4429: 1969.749156 from(985.881854,2+)

Title: Elution from: 41.032 to 41.032 scan no 3544 cid35.00 polarity:+:MA10:m1s





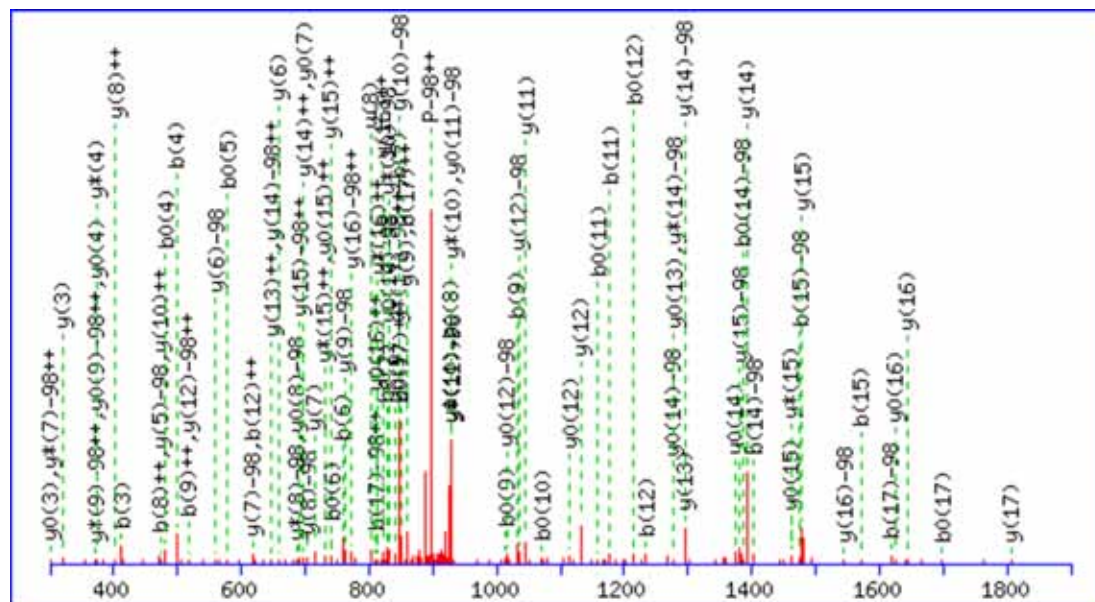

**Monoisotopic mass of neutral peptide Mr(calc):** 1889.7833

**Fixed modifications:** Carbamidomethyl (C) (apply to specified residues or termini only)

**Variable modifications:**

**N-term :** Dimethyl (N-term)

**T14 :** Phospho (ST), with neutral losses 97.9769(shown in table), 0.0000

**Ions Score:** 60 **Expect:** 3.1e-005

**Matched b ions:** b(3), b(4), b(6), b(7), b(8)++, b(9), b(9)++, b(11), b(12)++, b(12), b(14)-98, b(15), b(15)-98, b(17)-98, b(17)++, b(17)-98++

**Matched y ions:** y(3), y(5)-98, y(6)-98, y(6), y(7)-98, y(7), y(8)-98, y(8)++, y(8), y(9)-98, y(9), y(10)-98, y(10)++, y(11), y(12), y(12)-98, y(12)-98++, y(13), y(13)++, y(14), y(14)++, y(14)-98, y(14)-98++, y(15), y(15)-98++, y(15)-98, y(15)++, y(16)-98, y(16), y(16)-98++, y(16)++, y(17)

**Precursor origin neutral loss:** +

## Peptide No.365

**GYYPYSVSGSGSTAGSR**

**Confirmed sites:** @T:14,@S:17

**Ambiguous sites:**

**MS/MS Fragmentation of GYYPYSVSGSGSTAGSR**

Found in **PLEC\_MOUSE**, Plectin OS=Mus musculus GN=Plec PE=1 SV=2

Match to Query 4681: 1969.751910 from(985.883231,2+)

Title: Elution from: 43.632 to 43.632 scan no 3915 cid35.00 polarity:+MA10:m1s

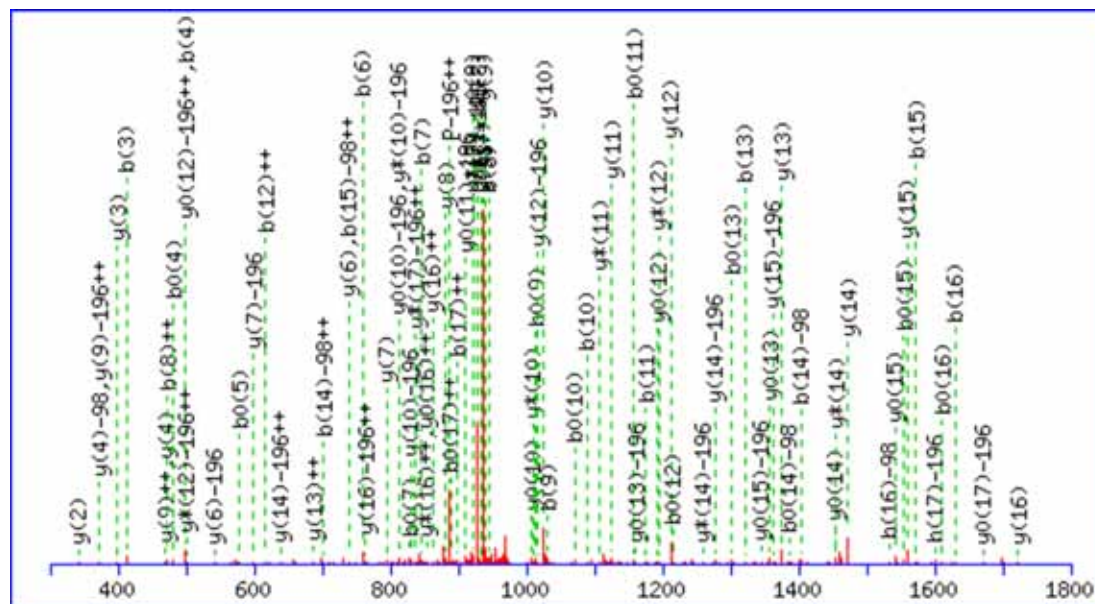

**Monoisotopic mass of neutral peptide Mr(calc):** 1969.7496

**Fixed modifications:** Carbamidomethyl (C) (apply to specified residues or termini only)

**Variable modifications:**

**N-term :** Dimethyl (N-term)

**T14 :** Phospho (ST), with neutral losses 0.0000(shown in table), 97.9769

**S17 :** Phospho (ST), with neutral losses 0.0000(shown in table), 97.9769

**Ions Score:** 64 **Expect:** 6.3e-006

**Matched b ions:** b(3), b(4), b(6), b(7), b(8)++, b(8), b(9), b(10), b(11), b(12)++, b(13), b(14)-98, b(14)-98++, b(15)-98++, b(15), b(16), b(16)-98, b(17)-98, b(17)-196, b(17)-98++, b(17)++

**Matched y ions:** y(2), y(3), y(4)-98, y(4), y(6), y(6)-196, y(6)-98, y(7)-98, y(7), y(7)-196, y(8)-98, y(8), y(9)-196++, y(9)-98, y(9)++, y(9), y(10), y(10)-98, y(10)-196, y(11), y(11)-98, y(11)-196, y(12)-98, y(12), y(12)-196, y(13)-98, y(13), y(13)-98++, y(13)++, y(14)-196, y(14)-98, y(14), y(14)-196++, y(14)-98++, y(15)-98++, y(15), y(15)-98, y(15)-196, y(16)-98++, y(16), y(16)-196++, y(16)++, y(16)-98

**Precursor origin neutral loss:** +

## Peptide No.366

**GYYPYSVSGSGSTAGSR**

**Confirmed sites:** @Y:6,@T:14

**Ambiguous sites:**

MS/MS Fragmentation of **GYYPYSVSGSGSTAGSR**

Found in **PLEC\_MOUSE**, Plectin OS=Mus musculus GN=Plec PE=1 SV=2

Match to Query 5471: 1969.749654 from(985.882103,2+)

Title: Elution from: 43.224 to 43.224 scan no 4087 cid35.00 polarity:+:MA10

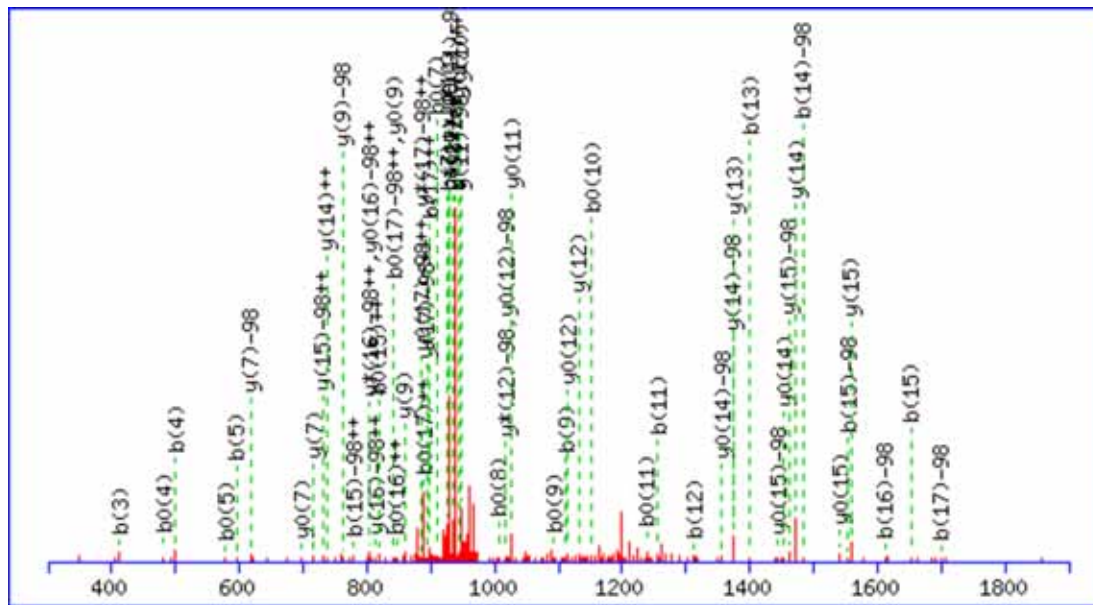

**Monoisotopic mass of neutral peptide Mr(calc):** 1969.7496

**Fixed modifications:** Carbamidomethyl (C) (apply to specified residues or termini only)

**Variable modifications:**

**N-term :** Dimethyl (N-term)

**Y6 :** Phospho (Y)

**T14 :** Phospho (ST), with neutral losses 97.9769(shown in table), 0.0000

**Ions Score:** 39 **Expect:** 0.002

**Matched b ions:** b(3), b(4), b(5), b(7), b(9), b(11), b(12), b(13), b(14)-98, b(15), b(15)-98++, b(15)-98, b(16)-98, b(17)-98, b(17)++

**Matched y ions:** y(7)-98, y(7), y(9)-98, y(9), y(10), y(11)-98, y(12), y(13), y(14)-98, y(14), y(14)++, y(15)-98++, y(15), y(15)-98, y(16)-98++, y(17)-98++, y(17)++

**Precursor origin neutral loss:** +

## Peptide No.367

**GYYPYSVSGSGSTAGSR**

**Confirmed sites:** @S:13

**Ambiguous sites:**

MS/MS Fragmentation of **GYYPYSVSGSGSTAGSR**

Found in **PLEC\_MOUSE**, Plectin OS=Mus musculus GN=Plec PE=1 SV=2

Match to Query 4025: 1895.815552 from(948.915052,2+)

Title: Elution from: 39.306 to 39.306 scan no 3327 cid35.00 polarity:+MA10:m1s



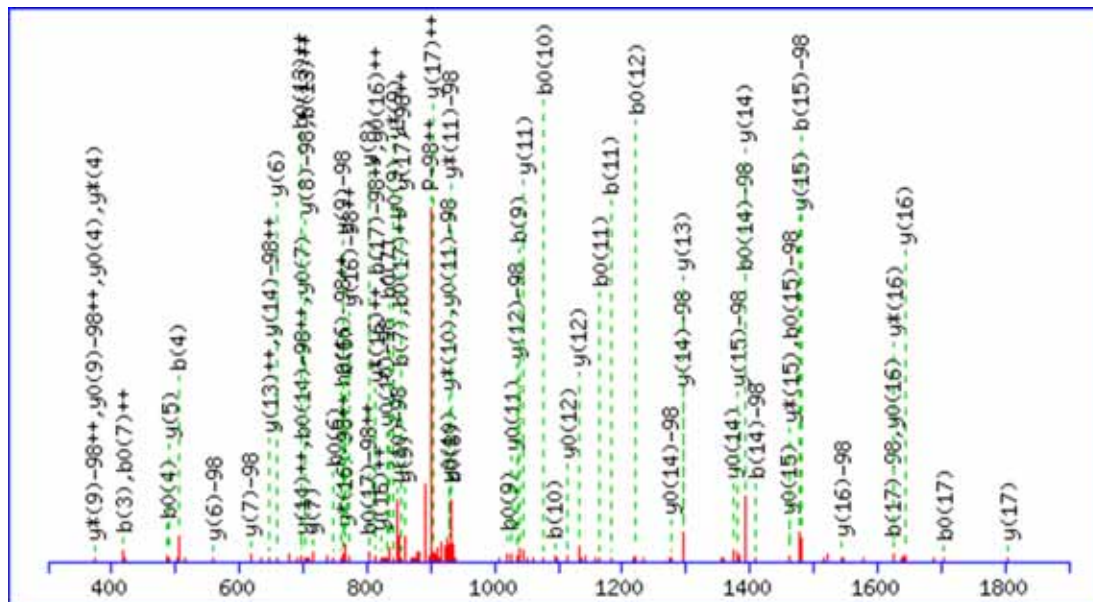

**Monoisotopic mass of neutral peptide Mr(calc):** 1895.8151

**Fixed modifications:** Carbamidomethyl (C) (apply to specified residues or termini only)

**Variable modifications:**

**N-term :** Dimethyl:2H(4)13C(2) (N-term)

**S13 :** Phospho (ST), with neutral losses 0.0000(shown in table), 97.9769

**Ions Score:** 59 **Expect:** 4.8e-005

**Matched b ions:** b(3), b(4), b(6), b(7), b(9), b(10), b(11), b(13)++, b(14)-98, b(15)-98, b(17)-98, b(17)-98++

**Matched y ions:** y(5), y(6), y(6)-98, y(7)-98, y(7), y(8), y(8)-98, y(9), y(9)-98, y(10)-98, y(11), y(12), y(12)-98, y(13)++, y(13), y(14)-98, y(14), y(14)-98++, y(14)++, y(15), y(15)-98, y(16), y(16)-98, y(16)-98++, y(16)++, y(17), y(17)-98++, y(17)++

**Precursor origin neutral loss:** +

## Peptide No.368

**GYYPYSVSGSGSTAGSR**

**Confirmed sites:** @Y:6,@S:13

**Ambiguous sites:**

MS/MS Fragmentation of **GYYPYSVSGSGSTAGSR**

Found in **PLEC\_MOUSE**, Plectin OS=Mus musculus GN=Plec PE=1 SV=2

Match to Query 6392: 1975.781750 from(988.898151,2+)

Title: Elution from: 42.035 to 42.035 scan no 3923 cid35.00 polarity:+MA10

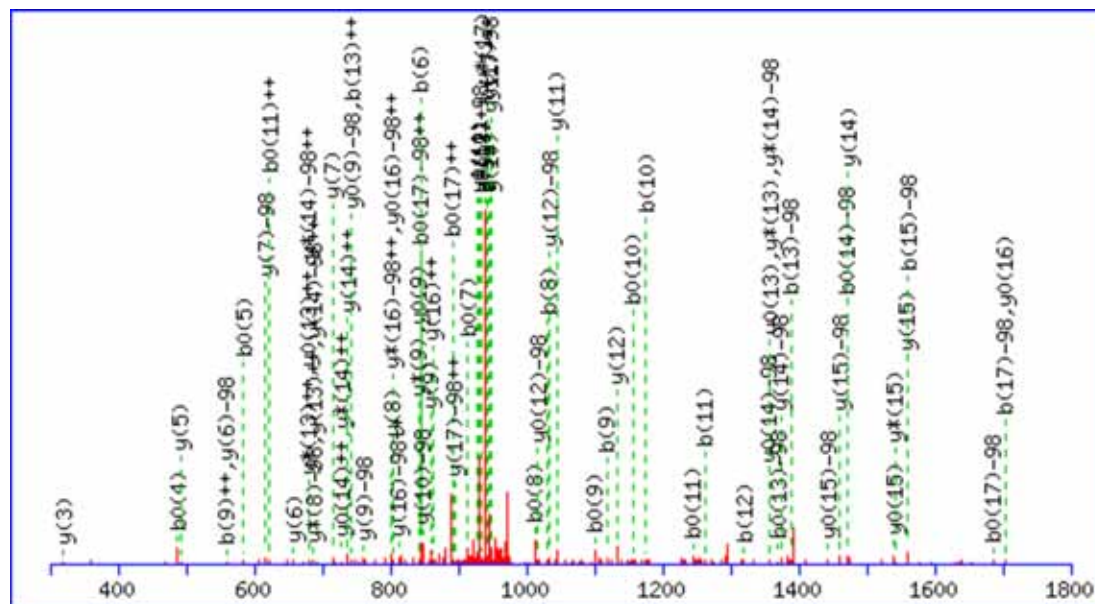

**Monoisotopic mass of neutral peptide Mr(calc):** 1975.7814

**Fixed modifications:** Carbamidomethyl (C) (apply to specified residues or termini only)

**Variable modifications:**

**N-term :** Dimethyl:2H(4)13C(2) (N-term)

**Y6 :** Phospho (Y)

**S13 :** Phospho (ST), with neutral losses 0.0000(shown in table), 97.9769

**Ions Score:** 41 **Expect:** 0.002

**Matched b ions:** b(6), b(8), b(9)++, b(9), b(10), b(11), b(12), b(13)-98, b(13)++, b(15)-98, b(17)-98

**Matched y ions:** y(3), y(5), y(6)-98, y(6), y(7)-98, y(7), y(8), y(9)-98, y(9), y(10)-98, y(10), y(11), y(11)-98, y(12), y(12)-98, y(13)++, y(14), y(14)-98, y(14)++, y(14)-98, y(15), y(15)-98, y(16)-98, y(16)++, y(17)-98, y(17)++

**Precursor origin neutral loss:** +

## Peptide No.369

**GYYPYSVSGSGSTAGSR**

**Confirmed sites:** @S:13,@T:14

**Ambiguous sites:**

MS/MS Fragmentation of **GYYPYSVSGSGSTAGSR**

Found in **PLEC\_MOUSE**, Plectin OS=Mus musculus GN=Plec PE=1 SV=2

Match to Query 4879: 1975.782452 from(988.898502,2+)

Title: Elution from: 43.757 to 43.757 scan no 3945 cid35.00 polarity:+MA10

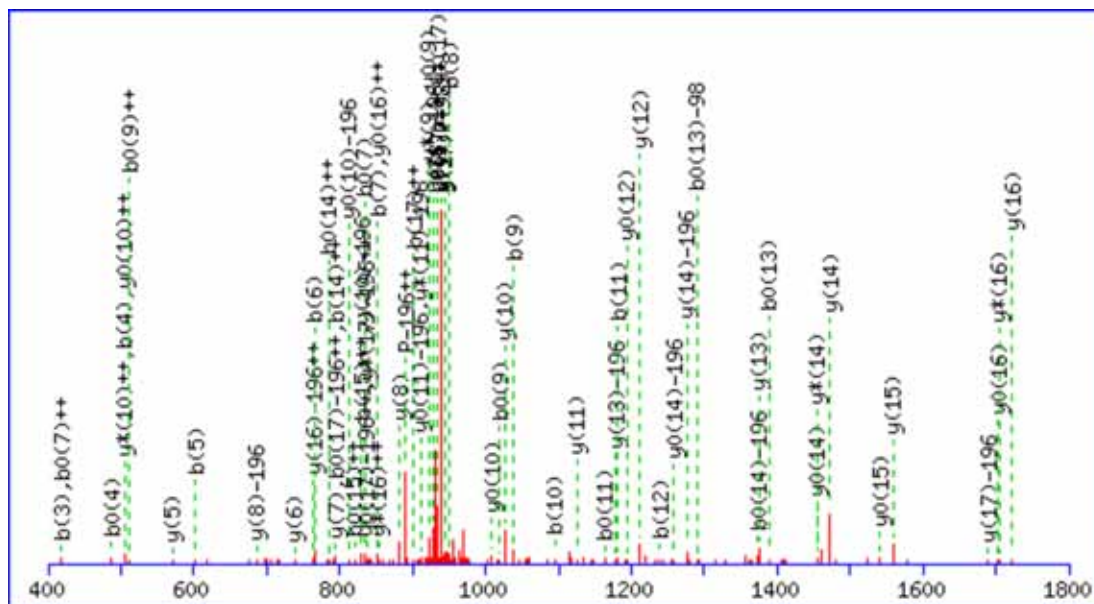

**Monoisotopic mass of neutral peptide Mr(calc):** 1975.7814

**Fixed modifications:** Carbamidomethyl (C) (apply to specified residues or termini only)

**Variable modifications:**

**N-term :** Dimethyl:2H(4)13C(2) (N-term)

**S13 :** Phospho (ST), with neutral losses 0.0000(shown in table), 97.9769

**T14 :** Phospho (ST), with neutral losses 0.0000(shown in table), 97.9769

**Ions Score:** 63 **Expect:** 1.2e-005

**Matched b ions:** b(3), b(4), b(5), b(6), b(7), b(8), b(9), b(10), b(11), b(12), b(14)++, b(15)++, b(15)-98, b(17)-98++, b(17)-98, b(17)++

**Matched y ions:** y(5), y(6), y(7)-98, y(7), y(8), y(8)-196, y(8)-98, y(9), y(9)-98, y(10), y(10)-98, y(10)-196, y(11)-98, y(11), y(11)-196, y(12), y(12)-98, y(13), y(13)-196, y(14)-196, y(14)-98, y(14), y(15), y(15)-98, y(16), y(16)-196++, y(16)-98++, y(17)-196, y(17)++

**Precursor origin neutral loss:** +

## Peptide No.370

**GYYPYSVSGSGSTAGSR**

**Confirmed sites:** @S:4,@S:17

**Ambiguous sites:**

MS/MS Fragmentation of **GYYPYSVSGSGSTAGSR**

Found in **PLEC\_MOUSE**, Plectin OS=Mus musculus GN=Plec PE=1 SV=2

Match to Query 4891: 1975.783878 from(988.899215,2+)

Title: Elution from: 42.065 to 42.065 scan no 3755 cid35.00 polarity:+:MA10:m1s

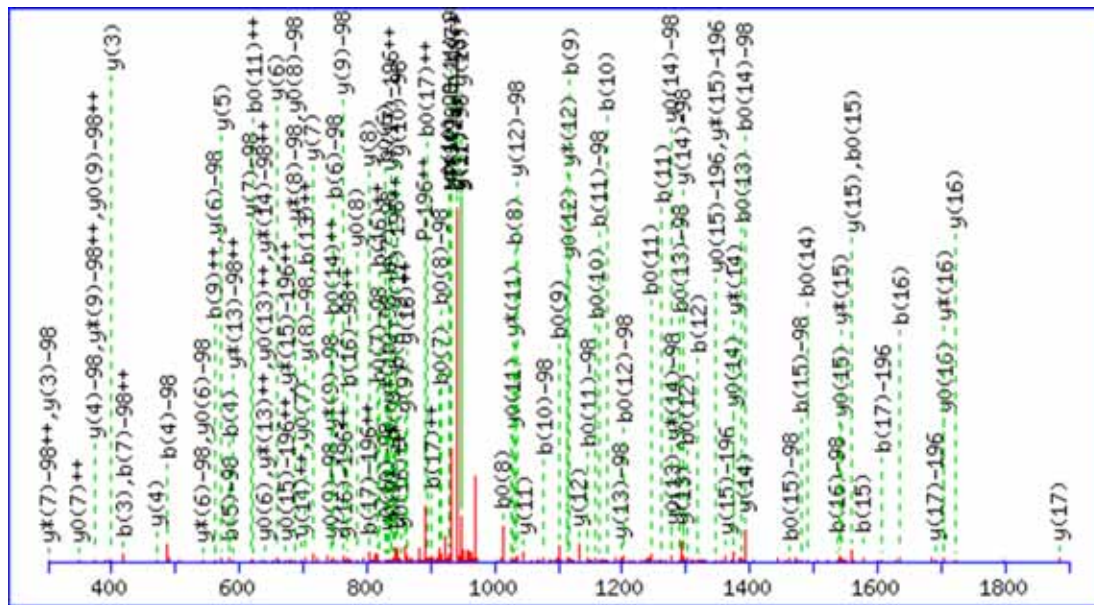

**Monoisotopic mass of neutral peptide Mr(calc):** 1975.7814

**Fixed modifications:** Carbamidomethyl (C) (apply to specified residues or termini only)

**Variable modifications:**

**N-term :** Dimethyl:2H(4)13C(2) (N-term)

**S4 :** Phospho (ST), with neutral losses 0.0000(shown in table), 97.9769

**S17 :** Phospho (ST), with neutral losses 0.0000(shown in table), 97.9769

**Ions Score:** 87 **Expect:** 4.1e-008

**Matched b ions:** b(3), b(4)-98, b(4), b(5)-98, b(6), b(6)-98, b(7)-98++, b(7)-98, b(7), b(8), b(8)-98, b(9), b(9)++, b(10)-98, b(10), b(11), b(11)-98, b(12), b(13)++, b(15), b(15)-98, b(16), b(16)-98++, b(16)++, b(16)-98, b(17)-98, b(17)-196, b(17)-196++, b(17)-98++, b(17)++

**Matched y ions:** y(3)-98, y(3), y(4)-98, y(4), y(5), y(6), y(6)-98, y(7), y(7)-98, y(8), y(8)-98, y(9), y(9)-98, y(10)-98, y(10), y(11), y(11)-98, y(12), y(12)-98, y(13), y(13)-98, y(14)-98, y(14), y(14)++, y(15)-98, y(15), y(15)-196, y(16), y(16)-196++, y(16)-98++, y(16)++, y(17), y(17)-196, y(17)-196++, y(17)-98++, y(17)++

**Precursor origin neutral loss:** +

## Peptide No.371

**GYYPYSVSGSGSTAGSR**

**Confirmed sites: @S:4,@Y:6**

**Ambiguous sites:**

MS/MS Fragmentation of **GYYPYSVSGSGSTAGSR**

Found in **PLEC\_MOUSE**, Plectin OS=Mus musculus GN=Plec PE=1 SV=2

Match to Query 4456: 1975.780580 from(988.897566,2+)

Title: Elution from: 41.936 to 41.936 scan no 3656 cid35.00 polarity:+:MA10



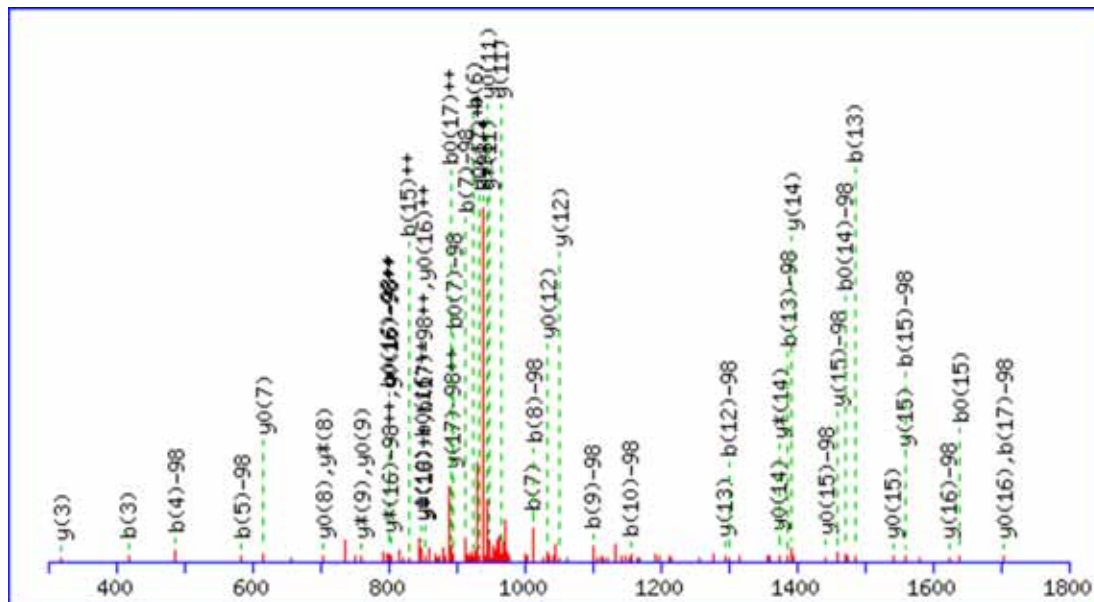

**Monoisotopic mass of neutral peptide Mr(calc):** 1975.7814

**Fixed modifications:** Carbamidomethyl (C) (apply to specified residues or termini only)

**Variable modifications:**

**N-term :** Dimethyl:2H(4)13C(2) (N-term)

**S4 :** Phospho (ST), with neutral losses 97.9769(shown in table), 0.0000

**Y6 :** Phospho (Y)

**Ions Score:** 49 **Expect:** 0.00031

**Matched b ions:** b(3), b(4)-98, b(5)-98, b(6), b(7)-98, b(7), b(8)-98, b(9)-98, b(10)-98, b(12)-98, b(13)-98, b(13), b(15)-98, b(15)++, b(17)-98, b(17)-98++

**Matched y ions:** y(3), y(11), y(12), y(13), y(14), y(15)-98, y(15), y(16)-98, y(17)-98++

**Precursor origin neutral loss:** +

## Peptide No.372

**GYYPYSVSGSGSTAGSR**

**Confirmed sites:** @S:9

**Ambiguous sites:** @Y:2orY:3

MS/MS Fragmentation of **GYYPYSVSGSGSTAGSR**

Found in **PLEC\_MOUSE**, Plectin OS=Mus musculus GN=Plec PE=1 SV=2

Match to Query 4702: 1975.783356 from(988.898954,2+)

Title: Elution from: 41.046 to 41.046 scan no 3590 cid35.00 polarity:+:MA10:m1s



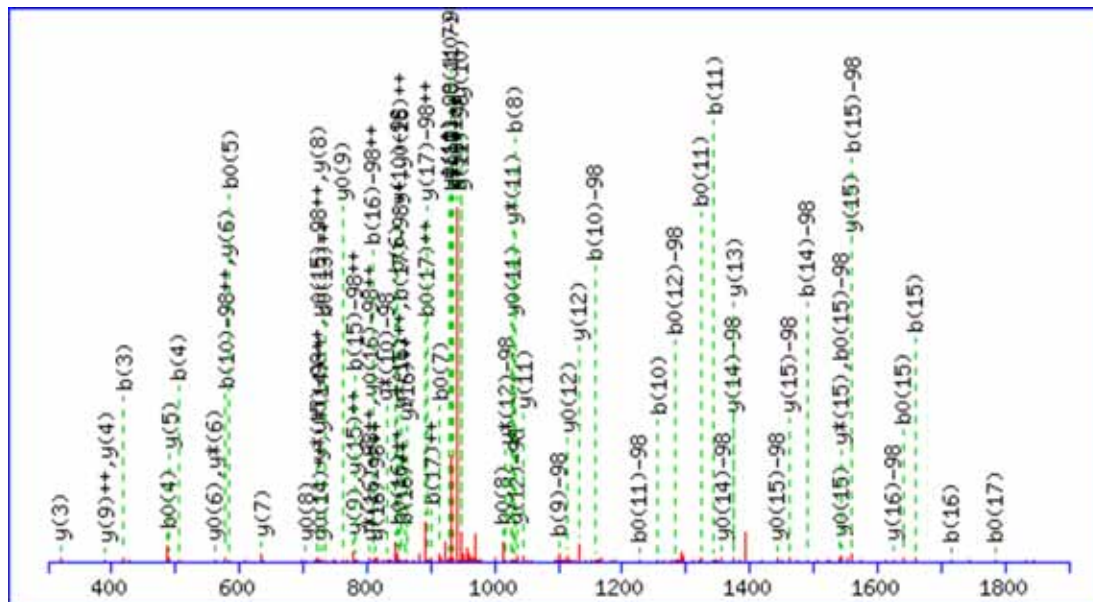

**Monoisotopic mass of neutral peptide Mr(calc):** 1975.7814

**Fixed modifications:** Carbamidomethyl (C) (apply to specified residues or termini only)

**Variable modifications:**

**N-term :** Dimethyl:2H(4)13C(2) (N-term)

**Y6 :** Phospho (Y)

**S9 :** Phospho (ST), with neutral losses 97.9769(shown in table), 0.0000

**Ions Score:** 68 **Expect:** 3.8e-006

**Matched b ions:** b(3), b(4), b(6), b(7), b(8), b(9)-98, b(10)-98++, b(10), b(10)-98, b(11), b(14)-98, b(15), b(15)-98, b(15)-98++, b(16), b(16)-98++, b(16)++, b(17)-98++, b(17)++

**Matched y ions:** y(3), y(4), y(5), y(6), y(7), y(8), y(9), y(9)++, y(10), y(10)-98, y(11), y(11)-98, y(12), y(12)-98, y(13), y(14)-98, y(15)++, y(15)-98, y(15), y(16)-98++, y(16)-98, y(16)++, y(17)-98++

**Precursor origin neutral loss:** +

## Peptide No.374

**GYYPYSVSGSGSTAGSR**

**Confirmed sites:** @S:17

**Ambiguous sites:** @S:13orT:14

MS/MS Fragmentation of **GYYPYSVSGSGSTAGSR**

Found in **PLEC\_MOUSE**, Plectin OS=Mus musculus GN=Plec PE=1 SV=2

Match to Query 4318: 1975.781818 from(988.898185,2+)

Title: Elution from: 43.618 to 43.618 scan no 3824 cid35.00 polarity:+:MA10





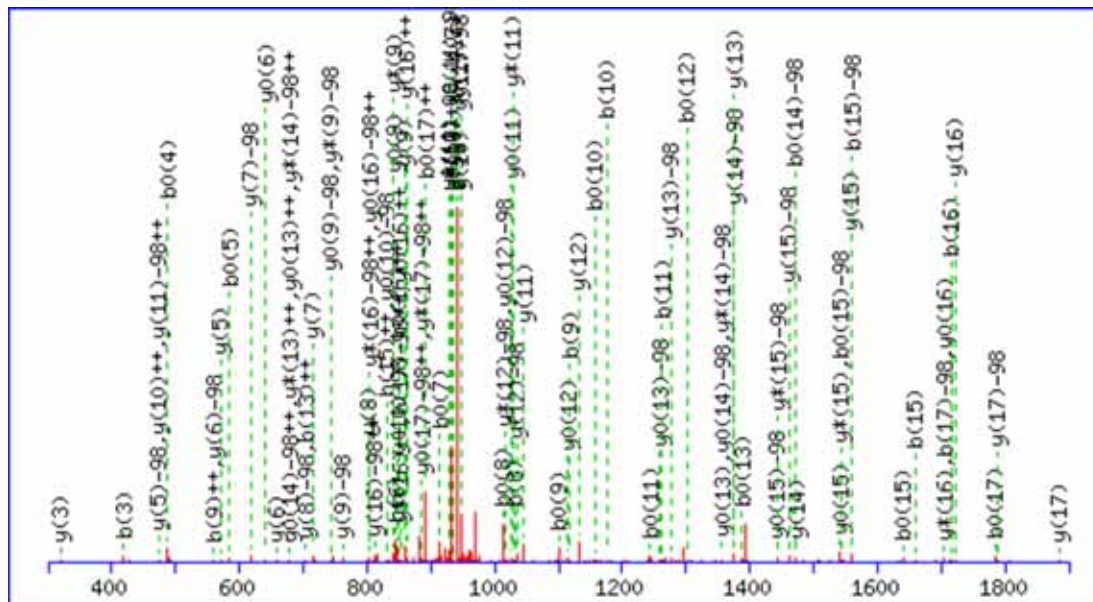

**Monoisotopic mass of neutral peptide Mr(calc):** 1975.7814

**Fixed modifications:** Carbamidomethyl (C) (apply to specified residues or termini only)

**Variable modifications:**

**N-term :** Dimethyl:2H(4)13C(2) (N-term)

**Y6 :** Phospho (Y)

**T14 :** Phospho (ST), with neutral losses 0.0000(shown in table), 97.9769

**Ions Score:** 86 **Expect:** 6.8e-008

**Matched b ions:** b(3), b(6), b(7), b(8), b(9)++, b(9), b(10), b(11), b(13)++, b(15)-98, b(15), b(15)++, b(16), b(17)-98, b(17)-98++

**Matched y ions:** y(3), y(5), y(5)-98, y(6), y(6)-98, y(7)-98, y(7), y(8), y(8)-98, y(9)-98, y(9), y(10), y(10)++, y(10)-98, y(11), y(11)-98++, y(11)-98, y(12), y(12)-98, y(13), y(13)-98, y(14)-98, y(14), y(15)-98, y(15), y(16)-98++, y(16), y(16)++, y(17), y(17)-98, y(17)++

**Precursor origin neutral loss:** +

## Peptide No.376

**HADSV AELGEQIDNLQR**

**Confirmed sites:** @S:4

**Ambiguous sites:**

**MS/MS Fragmentation of HADSV AELGEQIDNLQR**

Found in **MYH1\_MOUSE**, Myosin-1 OS=Mus musculus GN=Myh1 PE=1 SV=1

Match to Query 4544: 2001.917954 from(1001.966253,2+)

Title: Elution from: 49.667 to 49.667 scan no 4509 cid35.00 polarity:+:MA10:m1s

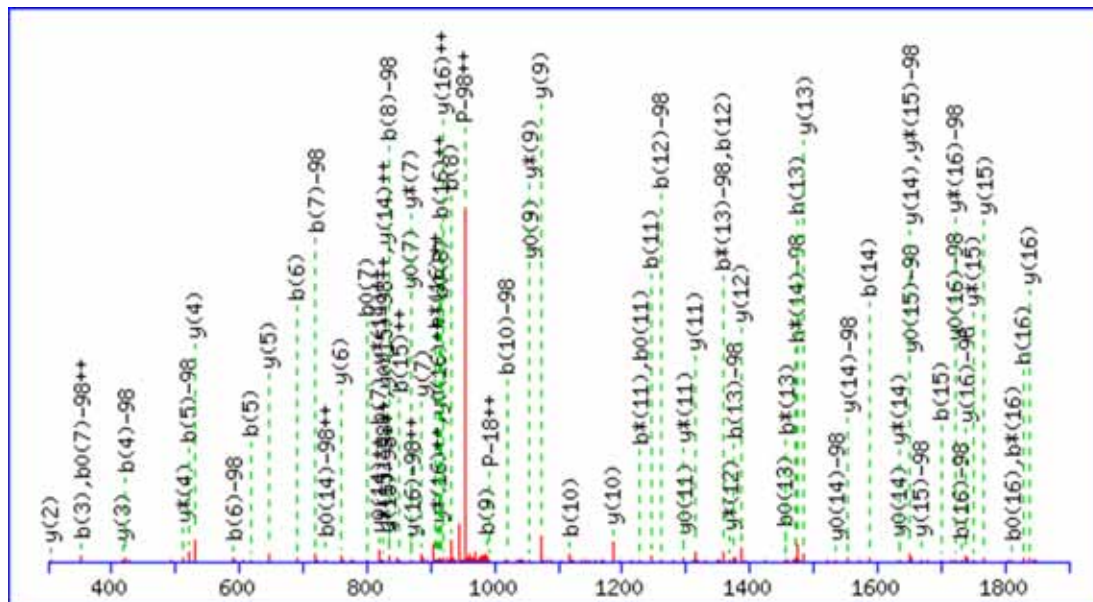

**Monoisotopic mass of neutral peptide Mr(calc):** 2001.9157

**Fixed modifications:** Carbamidomethyl (C) (apply to specified residues or termini only)

**Variable modifications:**

**N-term :** Dimethyl (N-term)

**S4 :** Phospho (ST), with neutral losses 97.9769(shown in table), 0.0000

**Ions Score:** 94 **Expect:** 2.4e-008

**Matched b ions:** b(3), b(4)-98, b(5)-98, b(5), b(6), b(6)-98, b(7)-98, b(7), b(8)-98, b(8), b(9), b(10), b(10)-98, b(11), b(12)-98, b(12), b(13), b(13)-98, b(14), b(15), b(15)++, b(16), b(16)-98, b(16)++

**Matched y ions:** y(2), y(3), y(4), y(5), y(6), y(7), y(9), y(10), y(11), y(12), y(13), y(14)-98, y(14), y(14)++, y(15), y(15)-98++, y(15)-98, y(16)-98, y(16), y(16)-98++, y(16)++

**Precursor origin neutral loss:** +

## Peptide No.377

**HADSV AELGEQIDNLQR**

**Confirmed sites:** @S:4

**Ambiguous sites:**

MS/MS Fragmentation of **HADSV AELGEQIDNLQR**

Found in **MYH1\_MOUSE**, Myosin-1 OS=Mus musculus GN=Myh1 PE=1 SV=1

Match to Query 4844: 2007.949348 from(1004.981950,2+)

Title: Elution from: 49.688 to 49.688 scan no 4637 cid35.00 polarity:+:MA10

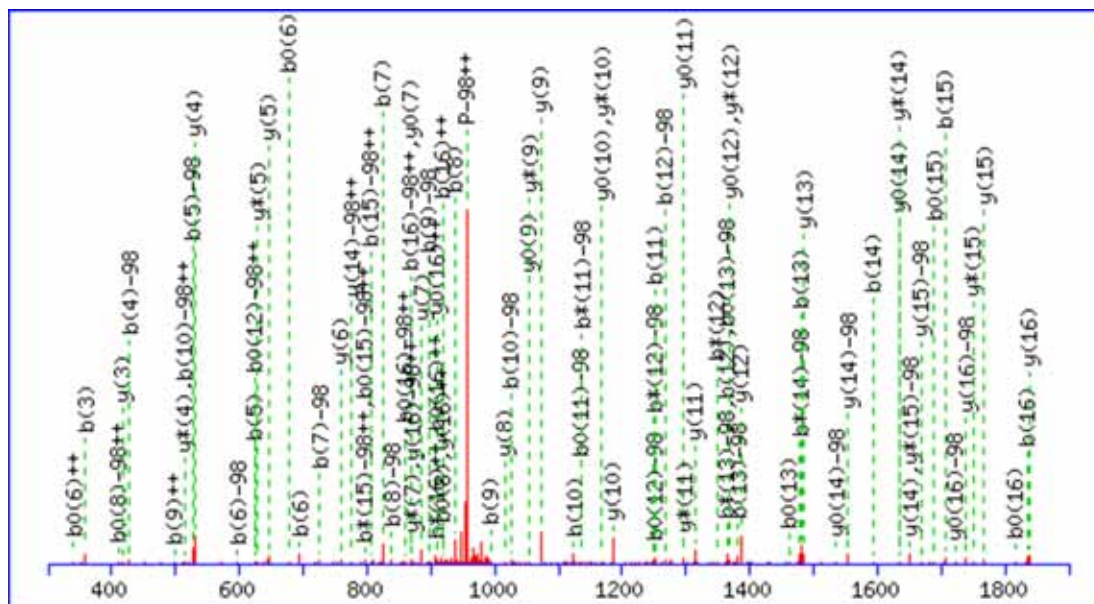

**Monoisotopic mass of neutral peptide Mr(calc):** 2007.9475

**Fixed modifications:** Carbamidomethyl (C) (apply to specified residues or termini only)

**Variable modifications:**

**N-term :** Dimethyl:2H(4)13C(2) (N-term)

**S4 :** Phospho (ST), with neutral losses 97.9769(shown in table), 0.0000

**Ions Score:** 96 **Expect:** 1.7e-008

**Matched b ions:** b(3), b(4)-98, b(5)-98, b(5), b(6)-98, b(6), b(7), b(7)-98, b(8), b(8)-98, b(9)++, b(9)-98, b(9), b(10), b(10)-98++, b(10)-98, b(11), b(12), b(12)-98, b(13), b(13)-98, b(14), b(15), b(15)-98++, b(16), b(16)-98++, b(16)++

**Matched y ions:** y(3), y(4), y(5), y(6), y(7), y(8), y(9), y(10), y(11), y(12), y(13), y(14)-98, y(14), y(14)-98++, y(15)-98, y(15), y(16), y(16)-98, y(16)-98++, y(16)++

**Precursor origin neutral loss:** +

## Peptide No.378

**HAFSPVASVESASGETLHSPK**

**Confirmed sites:** @S:11,@S:13

**Ambiguous sites:**

MS/MS Fragmentation of **HAFSPVASVESASGETLHSPK**

Found in **FETUA\_MOUSE**, Alpha-2-HS-glycoprotein OS=Mus musculus GN=Ahsg PE=1 SV=1

Match to Query 5714: 2353.040166 from(785.353998,3+)

Title: Elution from: 41.679 to 41.679 scan no 3623 cid35.00 polarity:+MA10:m1s

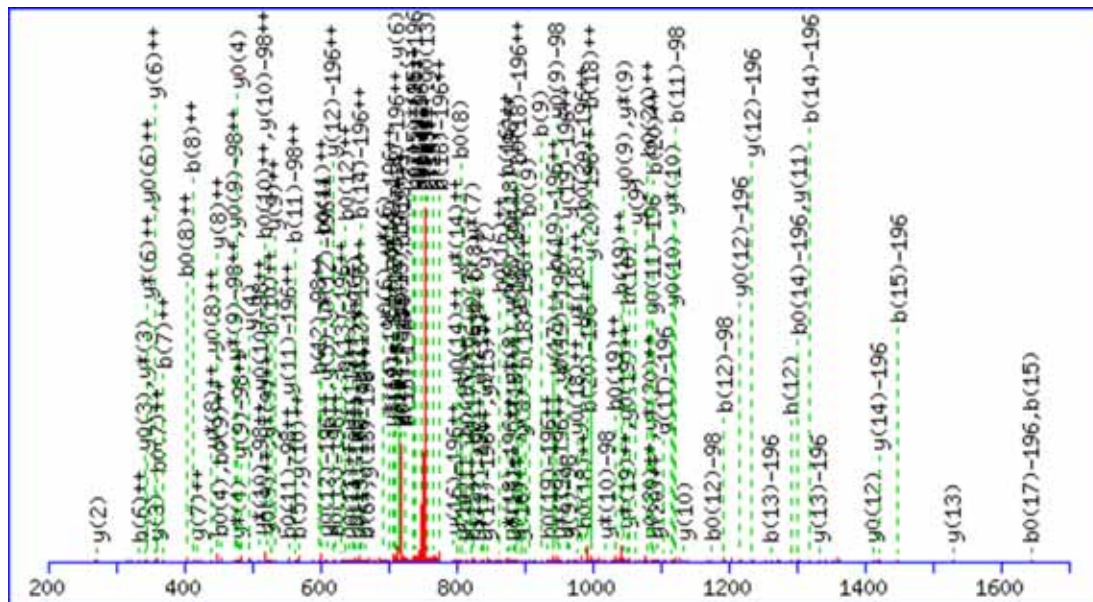

**Monoisotopic mass of neutral peptide Mr(calc):** 2353.0392

**Fixed modifications:** Carbamidomethyl (C) (apply to specified residues or termini only)

**Variable modifications:**

**N-term :** Dimethyl (N-term)

**S11 :** Phospho (ST), with neutral losses 97.9769(shown in table), 0.0000

**S13 :** Phospho (ST), with neutral losses 97.9769(shown in table), 0.0000

**K21 :** Dimethyl (K)

**Ions Score:** 56 **Expect:** 0.00017

**Matched b ions:** b(5), b(6), b(6)++, b(7)++, b(7), b(8)++, b(8), b(9), b(10)++, b(10), b(11)-98, b(11)-98++, b(12)-98, b(12), b(12)-98++, b(13)-98, b(13)-196, b(13)-196++, b(13)-98++, b(14)-98, b(14)-196++, b(14)-98++, b(14)++, b(14)-196, b(15)-98++, b(15)-196, b(15), b(15)++, b(15)-196++, b(16)-98++, b(16)++, b(16)-196++, b(17)-98++, b(18)-98++, b(18)++, b(18)-196++, b(19)-196++, b(19)++, b(19)-98++, b(20)-98++, b(20)-196++, b(20)++

**Matched y ions:** y(2), y(3), y(4), y(5), y(6)++, y(6), y(7)++, y(7), y(8)++, y(8), y(9)-98++, y(9)++, y(9)-98, y(9), y(10)-98++, y(10)++, y(10), y(11)-98++, y(11)-98, y(11)++, y(11)-196++, y(11), y(11)-196, y(12)-196, y(12)-98++, y(12)-196++, y(12)++, y(12)-98, y(13), y(13)-196, y(13)-196++, y(13)-98++, y(13)++, y(14)-196, y(14)-196++, y(14)-98++, y(14)++, y(15)-196++, y(15)++, y(15)-98++, y(16)-98++, y(16)-196++, y(16)++, y(17)-196++, y(17)++, y(18)-196++, y(18)-98++, y(19)-196++, y(19)-98++, y(20)++, y(20)-98++, y(20)-196++

**Precursor origin neutral loss:** +

## Peptide No.379

**HAFSPVASVESASGETLHSPK**

**Confirmed sites:** @S:8,@S:11,@S:13

**Ambiguous sites:**

MS/MS Fragmentation of **HAFSPVASVESASGETLHSPK**

Found in **FETUA\_MOUSE**, Alpha-2-HS-glycoprotein OS=Mus musculus GN=Ahsg PE=1 SV=1

Match to Query 6417: 2433.007314 from(812.009714,3+)



Title: Elution from: 44.003 to 44.003 scan no 3972 cid35.00 polarity:+:MA10:m1s

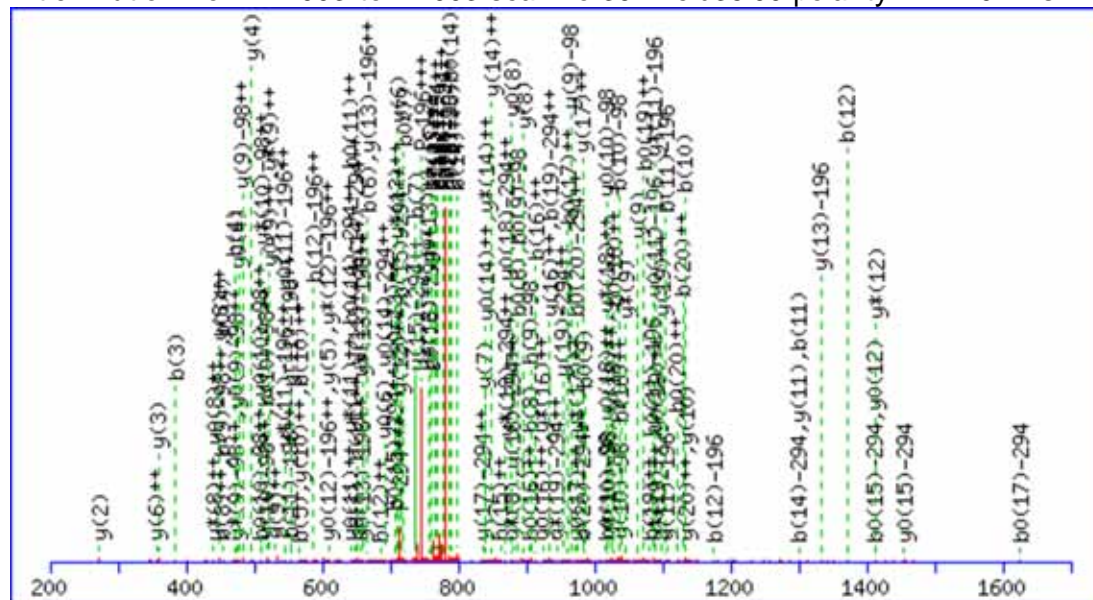

**Monoisotopic mass of neutral peptide Mr(calc):** 2433.0056

**Fixed modifications:** Carbamidomethyl (C) (apply to specified residues or termini only)

**Variable modifications:**

**N-term :** Dimethyl (N-term)

**S8 :** Phospho (ST), with neutral losses 97.9769(shown in table), 0.0000

**S11 :** Phospho (ST), with neutral losses 97.9769(shown in table), 0.0000

**S13 :** Phospho (ST), with neutral losses 97.9769(shown in table), 0.0000

**K21 :** Dimethyl (K)

**Ions Score:** 35 **Expect:** 0.014

**Matched b ions:** b(3), b(4), b(5), b(6), b(7), b(8)++, b(8), b(9)-98++, b(9)-98, b(10), b(10)-98++, b(10)++, b(10)-98, b(11)++, b(11)-98, b(11)-98++, b(11), b(11)-196, b(11)-196++, b(12)-98, b(12)-196, b(12)-196++, b(12), b(12)++, b(13)-98, b(13)-196, b(13)-196++, b(13)-98++, b(13)++, b(14)-294++, b(14)-294, b(14)++, b(14)-196++, b(14)-98++, b(15)-98, b(15)-196++, b(15)-294++, b(15)++, b(16)-294++, b(16)-98++, b(16)++, b(18)++, b(18)-98++, b(18)-196++, b(19)-294++, b(19)-98++, b(19)++, b(19)-196++, b(20)-196++, b(20)-98++, b(20)-294++, b(20)++

**Matched y ions:** y(2), y(3), y(4), y(5), y(6)++, y(6), y(7), y(8)++, y(8), y(9)++, y(9)-98++, y(9), y(9)-98, y(10)-98++, y(10)-98, y(10)++, y(10), y(11)++, y(11)-98++, y(11), y(11)-196++, y(11)-196, y(12)-98++, y(12)-98, y(12)++, y(13)-196++, y(13)++, y(13)-196, y(13)-98++, y(14)-98++, y(14)-196++, y(14)++, y(15)-196++, y(15)-294++, y(15)-98++, y(16)++, y(16)-294++, y(16)-196++, y(17)-294++, y(17)-98++, y(17)++, y(18)++, y(18)-294++, y(18)-196++, y(18)-98++, y(19)-294++, y(19)++, y(19)-196++, y(19)-98++, y(20)-98++, y(20)-196++, y(20)++

**Precursor origin neutral loss:** +

## Peptide No.380

**HAFSPVASVESASGETLHSPK**

**Confirmed sites:** @S:11,@S:13

**Ambiguous sites:**

MS/MS Fragmentation of **HAFSPVASVESASGETLHSPK**

Found in **FETUA\_MOUSE**, Alpha-2-HS-glycoprotein OS=Mus musculus GN=Ahsg PE=1 SV=1

Match to Query 6271: 2365.103268 from(789.375032,3+)

Title: Elution from: 41.621 to 41.621 scan no 3694 cid35.00 polarity:+:MA10:m1s

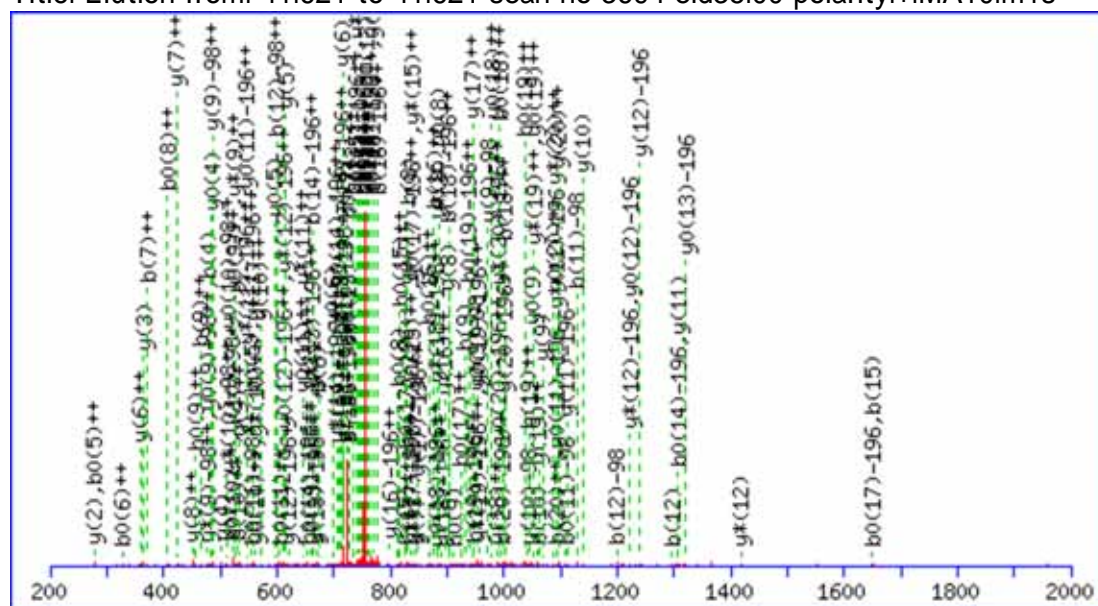

**Monoisotopic mass of neutral peptide Mr(calc): 2365.1029**

**Fixed modifications:** Carbamidomethyl (C) (apply to specified residues or termini only)

**Variable modifications:**

**N-term :** Dimethyl:2H(4)13C(2) (N-term)

**S11 :** Phospho (ST), with neutral losses 97.9769(shown in table), 0.0000

**S13 :** Phospho (ST), with neutral losses 97.9769(shown in table), 0.0000

**K21 :** Dimethyl:2H(4)13C(2) (K)

**Ions Score:** 45 **Expect:** 0.0023

**Matched b ions:** b(4), b(6), b(7)++, b(7), b(8), b(9)++, b(9), b(10), b(10)++, b(11)-98, b(12)-98, b(12), b(12)-98++, b(13)-98, b(13)++, b(14)-196++, b(14)-98++, b(14)++, b(15)-98, b(15), b(15)-98++, b(15)-196++, b(15)++, b(16)++, b(16)-98++, b(16)-196++, b(17)-196++, b(17)-98++, b(18)-98++, b(18)-196++, b(18)++, b(19)-196++, b(19)-98++, b(19)++, b(20)++, b(20)-196++, b(20)-98++

**Matched y ions:** y(2), y(3), y(4), y(5), y(6)++, y(6), y(7)++, y(7), y(8)++, y(8), y(9)++, y(9)-98++, y(9)-98, y(9), y(10)-98++, y(10), y(10)++, y(10)-98, y(11)-98++, y(11), y(11)-98, y(11)++, y(11)-196++, y(11)-196, y(12)-98++, y(12)++, y(12)-196, y(12)-196++, y(13)-196++, y(13)++, y(13)-98++, y(14)-196++, y(14)-98++, y(15)-196++, y(15)-98++, y(16)-98++, y(16)-196++, y(16)++, y(17)-196++, y(17)-98++, y(17)++, y(18)-98++, y(18)++, y(18)-196++, y(19)-98++, y(19)++, y(20)-98++, y(20)++, y(20)-196++

**Precursor origin neutral loss:** +

## Peptide No.381

**HAFSPVASVESASGETLHSPK**

**Confirmed sites:** @S:11,@T:16

**Ambiguous sites:**

MS/MS Fragmentation of **HAFSPVASVESASGETLHSPK**

Found in **FETUA\_MOUSE**, Alpha-2-HS-glycoprotein OS=Mus musculus GN=Ahsg PE=1 SV=1

Match to Query 6339: 2365.105029 from(789.375619,3+)

Title: Elution from: 41.639 to 41.639 scan no 3691 cid35.00 polarity:+:MA10:m1s

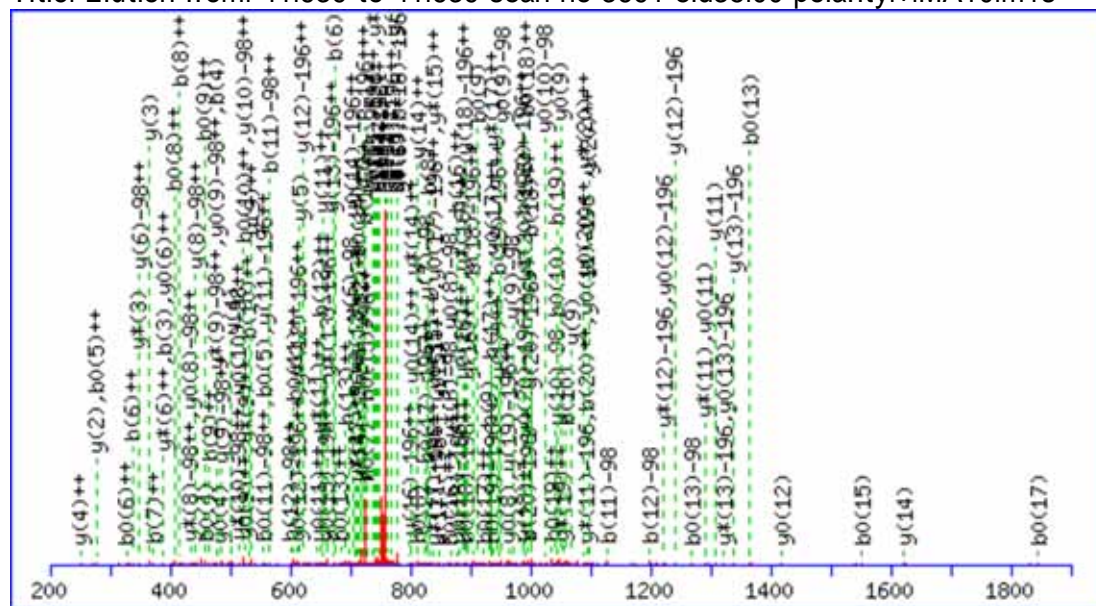

**Monoisotopic mass of neutral peptide Mr(calc): 2365.1029**

**Fixed modifications:** Carbamidomethyl (C) (apply to specified residues or termini only)

**Variable modifications:**

**N-term :** Dimethyl:2H(4)13C(2) (N-term)

**S11 :** Phospho (ST), with neutral losses 97.9769(shown in table), 0.0000

**T16 :** Phospho (ST), with neutral losses 97.9769(shown in table), 0.0000

**K21 :** Dimethyl:2H(4)13C(2) (K)

**Ions Score: 36 Expect: 0.02**

**Matched b ions:** b(3), b(4), b(6)++, b(6), b(7), b(7)++, b(8)++, b(8), b(9), b(9)++, b(10), b(10)++, b(11)-98, b(11)-98++, b(12)-98, b(12)-98++, b(12)++, b(13)++, b(14)++, b(15)-98++, b(16)-196++, b(16)-98++, b(16)++, b(17)++, b(18)-196++, b(18)++, b(18)-98++, b(19)-98++, b(19)-196++, b(19)++, b(20)-196++, b(20)-98++, b(20)++

**Matched y ions:** y(2), y(3), y(4), y(4)++, y(5), y(6)-98++, y(6)-98, y(7)-98, y(8)-98++, y(9)++, y(9)-98++, y(9), y(9)-98, y(10)-98++, y(10)-98, y(11)-98++, y(11), y(11)-98, y(11)-196++, y(11)++, y(12)++, y(12)-196, y(12)-196++, y(12)-98++, y(13)-196, y(13)++, y(13)-196++, y(13)-98++, y(14), y(14)-98++, y(14)-196++, y(14)++, y(15)-196++, y(15)-98++, y(15)++, y(16)-196++, y(16)-98++, y(16)++, y(17)-196++, y(17)-98++, y(17)++, y(18)-196++, y(18)++, y(19)-196++, y(19)-98++, y(20)-196++, y(20)-98++, y(20)++

**Precursor origin neutral loss: +**

## Peptide No.382

**HAFSPVASVESASGETLHSPK**

**Confirmed sites: @S:8,@S:11,@S:13**

**Ambiguous sites:**

**MS/MS Fragmentation of HAFSPVASVESASGETLHSPK**

Found in **FETUA\_MOUSE**, Alpha-2-HS-glycoprotein OS=Mus musculus GN=Ahsg PE=1 SV=1

Match to Query 6367: 2445.071271 from(816.031033,3+)



Title: Elution from: 43.870 to 43.870 scan no 3979 cid35.00 polarity:+:MA10:m1s

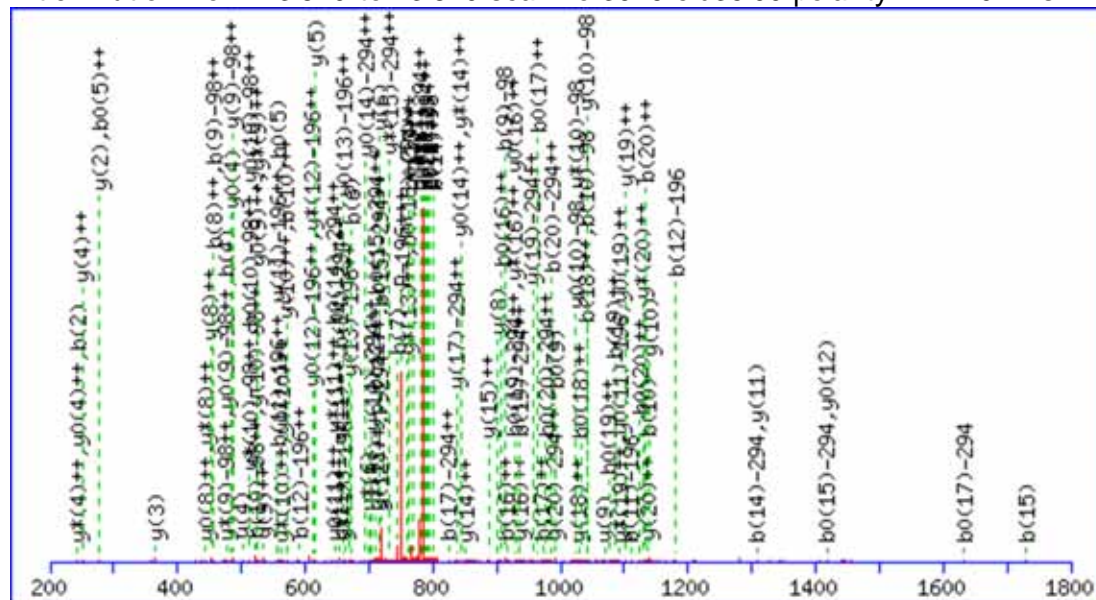

**Monoisotopic mass of neutral peptide Mr(calc):** 2445.0692

**Fixed modifications:** Carbamidomethyl (C) (apply to specified residues or termini only)

**Variable modifications:**

**N-term :** Dimethyl:2H(4)13C(2) (N-term)

**S8 :** Phospho (ST), with neutral losses 0.0000(shown in table), 97.9769

**S11 :** Phospho (ST), with neutral losses 0.0000(shown in table), 97.9769

**S13 :** Phospho (ST), with neutral losses 0.0000(shown in table), 97.9769

**K21 :** Dimethyl:2H(4)13C(2) (K)

**Ions Score:** 36 **Expect:** 0.014

**Matched b ions:** b(2), b(4), b(6), b(7), b(8)++, b(9)-98, b(9)-98++, b(10)-98++, b(10), b(10)++, b(10)-98, b(11)-98++, b(11)-98, b(11)++, b(11)-196++, b(11)-196, b(12)-98, b(12)-196, b(12)-196++, b(12)-98++, b(13)-196, b(13)-98, b(13)-98++, b(13)-196++, b(14)-294++, b(14)-294, b(14)-196++, b(14)++, b(15)-294++, b(15)-98, b(15), b(15)-196++, b(16)-98++, b(16)++, b(17)-294++, b(17)++, b(18)-98++, b(18)++, b(18)-196++, b(19)-294++, b(19)++, b(19)-98++, b(19)-196++, b(20)-98++, b(20)-196++, b(20)-294++, b(20)++

**Matched y ions:** y(2), y(3), y(4)++, y(4), y(5), y(6), y(8)++, y(8), y(9)++, y(9)-98++, y(9), y(10)-98++, y(10), y(10)++, y(10)-98, y(11)-98++, y(11)-98, y(11)++, y(11)-196++, y(11), y(12)++, y(12)-98++, y(13)-98++, y(13)-196++, y(13)++, y(14)++, y(14)-294++, y(14)-196++, y(14)-98++, y(15)++, y(15)-196++, y(15)-98++, y(16)++, y(16)-98++, y(16)-294++, y(16)-196++, y(17)-98++, y(17)-196++, y(17)-294++, y(18)-196++, y(18)-98++, y(18)++, y(19)++, y(19)-98++, y(19)-294++, y(19)-196++, y(20)-196++, y(20)-98++, y(20)++, y(20)-294++

**Precursor origin neutral loss:** +

## Peptide No.383

**HALEHPEPESEQNGLERPGSGR**

**Confirmed sites:** @S:20

**Ambiguous sites:**

MS/MS Fragmentation of **HALEHPEPESEQNGLERPGSGR**







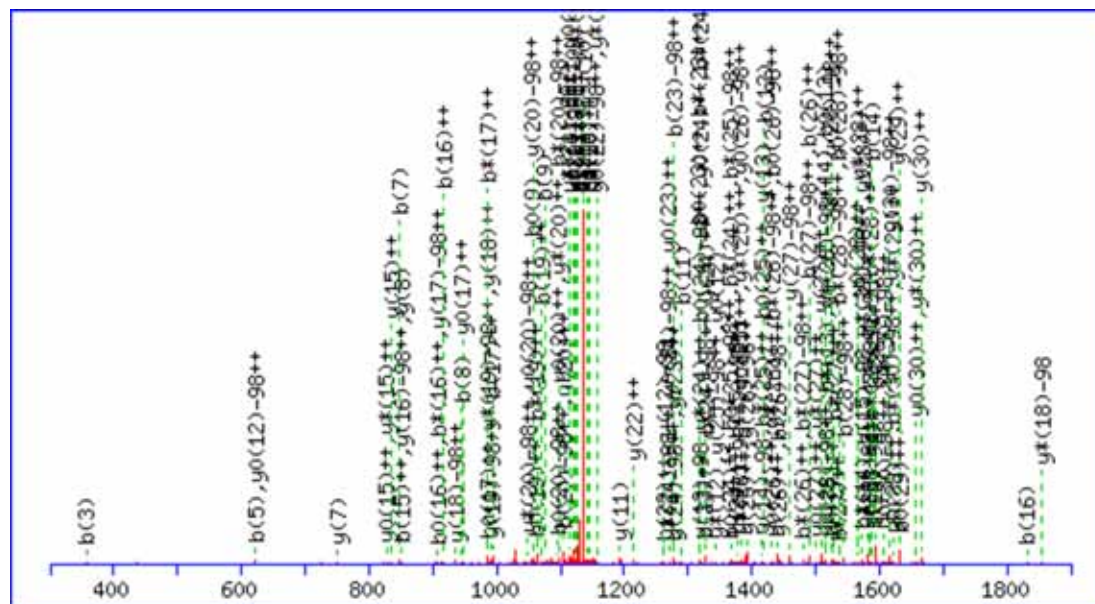

**Monoisotopic mass of neutral peptide Mr(calc):** 3500.6534

**Fixed modifications:** Carbamidomethyl (C) (apply to specified residues or termini only)

**Variable modifications:**

**N-term :** Dimethyl:2H(4)13C(2) (N-term)

**S20 :** Phospho (ST), with neutral losses 97.9769(shown in table), 0.0000

**Ions Score:** 85 **Expect:** 4.1e-007

**Matched b ions:** b(3), b(5), b(7), b(8), b(9), b(11), b(12), b(14), b(15)++, b(16), b(16)++, b(17)++, b(19)++, b(20)-98++, b(21)-98++, b(22)++, b(23)++, b(23)-98++, b(24)-98++, b(24)++, b(25)-98++, b(26)-98++, b(26)++, b(27)-98++, b(27)++, b(28)++, b(28)-98++, b(29)-98++

**Matched y ions:** y(7), y(8), y(10), y(11), y(12)-98, y(13)-98, y(13), y(14), y(14)-98, y(15)++, y(15)-98, y(16)-98++, y(17)-98++, y(18)-98++, y(18)++, y(19)-98++, y(20)++, y(20)-98++, y(21)-98++, y(22)++, y(23)++, y(24)++, y(24)-98++, y(25)++, y(25)-98++, y(26)-98++, y(26)++, y(27)++, y(27)-98++, y(28)++, y(28)-98++, y(29)++, y(29)-98++, y(30)++, y(30)-98++

**Precursor origin neutral loss:** +

## Peptide No.386

**HALEHPEPESEQNGLERPGSGRETPQPIPAQ**

**Confirmed sites:** @S:20,@T:24

**Ambiguous sites:**

MS/MS Fragmentation of **HALEHPEPESEQNGLERPGSGRETPQPIPAQ**

Found in **ANKR2\_MOUSE**, Ankyrin repeat domain-containing protein 2 OS=Mus musculus GN=Ankrd2 PE=2 SV=2

Match to Query 7727: 3580.627077 from(1194.549635,3+)

Title: Elution from: 35.560 to 35.560 scan no 2899 cid35.00 polarity:+:MA10:m1s





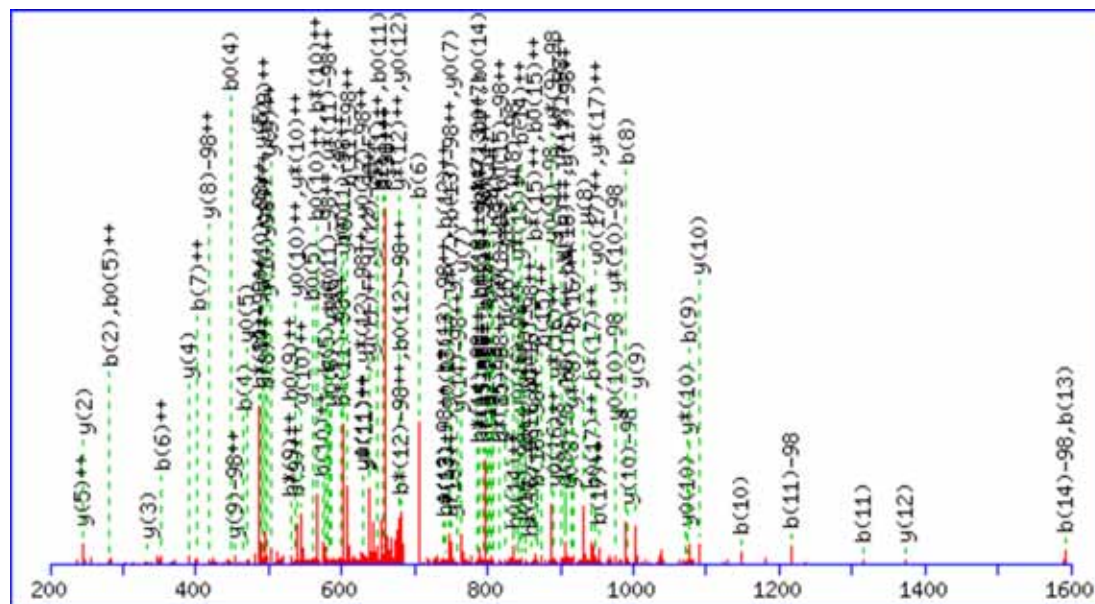

**Monoisotopic mass of neutral peptide Mr(calc):** 2077.9146

**Fixed modifications:** Carbamidomethyl (C) (apply to specified residues or termini only)

**Variable modifications:**

**N-term :** Dimethyl (N-term)

**S11 :** Phospho (ST), with neutral losses 0.0000(shown in table), 97.9769

**K18 :** Dimethyl (K)

**Ions Score:** 57 **Expect:** 0.00013

**Matched b ions:** b(2), b(4), b(5), b(6), b(6)++, b(7)++, b(7), b(8), b(8)++, b(9), b(9)++, b(10), b(10)++, b(11)-98, b(11), b(11)-98++, b(11)++, b(12)++, b(13)++, b(13), b(13)-98++, b(14)-98++, b(14)-98, b(14)++, b(15)++, b(15)-98++, b(16)++, b(16)-98++, b(17)++

**Matched y ions:** y(2), y(3), y(4), y(5)++, y(5), y(6), y(7), y(8), y(8)-98++, y(8)-98, y(9), y(9)++, y(9)-98, y(9)-98++, y(10), y(10)++, y(10)-98++, y(10)-98, y(11)++, y(12), y(12)-98++, y(13)++, y(14)-98++, y(14)++, y(15)-98++, y(15)++, y(16)-98++, y(16)++, y(17)-98++

**Precursor origin neutral loss:** +

## Peptide No.388

**HDSLQPSASYPGSAK**

**Confirmed sites:** @S:9

**Ambiguous sites:**

MS/MS Fragmentation of **HDSLQPSASYPGSAK**

Found in **CAH3\_MOUSE**, Carbonic anhydrase 3 OS=Mus musculus GN=Ca3 PE=1 SV=3

Match to Query 6031: 2077.916076 from(693.645968,3+)

Title: Elution from: 45.435 to 45.435 scan no 4356 cid35.00 polarity:+:MA10:m1s



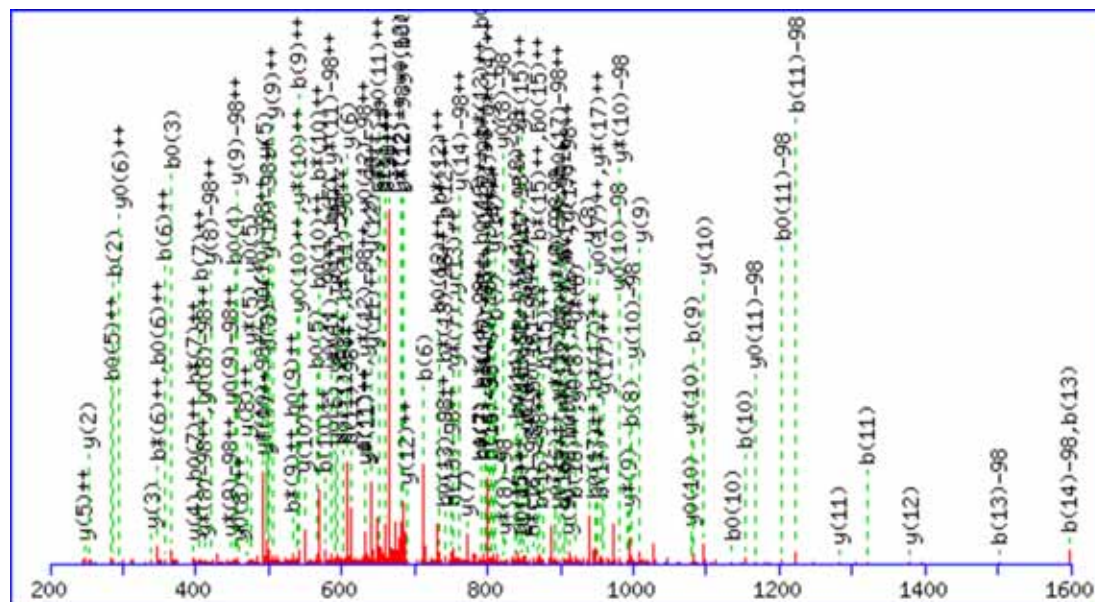

**Monoisotopic mass of neutral peptide Mr(calc):** 2089.9782

**Fixed modifications:** Carbamidomethyl (C) (apply to specified residues or termini only)

**Variable modifications:**

**N-term :** Dimethyl:2H(4)13C(2) (N-term)

**S11 :** Phospho (ST), with neutral losses 0.0000(shown in table), 97.9769

**K18 :** Dimethyl:2H(4)13C(2) (K)

**Ions Score:** 53 **Expect:** 0.00034

**Matched b ions:** b(2), b(5), b(6), b(6)++, b(7)++, b(7), b(8)++, b(8), b(9), b(9)++, b(10), b(10)++, b(11)-98, b(11), b(11)-98++, b(11)++, b(12)++, b(13)++, b(13)-98, b(13), b(13)-98++, b(14)-98++, b(14)-98, b(14)++, b(15)++, b(16)-98++, b(16)++, b(17)++, b(17)-98++

**Matched y ions:** y(2), y(3), y(4), y(5), y(5)++, y(6), y(7), y(8), y(8)-98, y(8)-98++, y(8)++, y(9)-98, y(9), y(9)++, y(9)-98++, y(10), y(10)-98++, y(10)++, y(10)-98, y(11), y(11)++, y(11)-98++, y(12), y(12)-98++, y(12)++, y(13)++, y(14)-98++, y(14)++, y(15)-98++, y(15)++, y(16)-98++, y(16)++, y(17)-98++, y(17)++

**Precursor origin neutral loss:** +

## Peptide No.390

**HDSLQWASASYDPGSAK**

**Confirmed sites:** @S:9

**Ambiguous sites:**

MS/MS Fragmentation of **HDSLQWASASYDPGSAK**

Found in **CAH3\_MOUSE**, Carbonic anhydrase 3 OS=Mus musculus GN=Ca3 PE=1 SV=3

Match to Query 5423: 2089.981269 from(697.667699,3+)

Title: Elution from: 45.369 to 45.369 scan no 4145 cid35.00 polarity:+:MA10:m1s

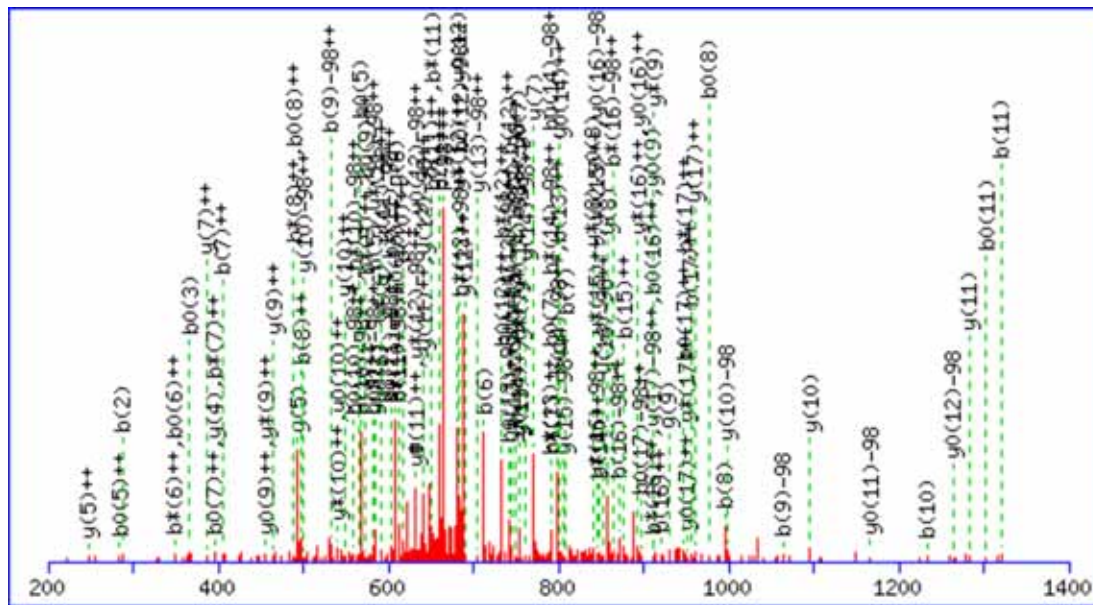

**Monoisotopic mass of neutral peptide Mr(calc):** 2089.9782

**Fixed modifications:** Carbamidomethyl (C) (apply to specified residues or termini only)

**Variable modifications:**

**N-term :** Dimethyl:2H(4)13C(2) (N-term)

**S9 :** Phospho (ST), with neutral losses 0.0000(shown in table), 97.9769

**K18 :** Dimethyl:2H(4)13C(2) (K)

**Ions Score:** 35 **Expect:** 0.021

**Matched b ions:** b(2), b(5), b(6), b(7)++, b(7), b(8), b(8)++, b(9)-98, b(9)-98++, b(9)++, b(10)-98++, b(10), b(10)++, b(11), b(11)-98++, b(11)++, b(12)++, b(13)++, b(13)-98++, b(14)-98++, b(14)++, b(15)++, b(16)-98++, b(16)++, b(17)++

**Matched y ions:** y(4), y(5), y(5)++, y(6), y(7), y(7)++, y(8), y(9), y(9)++, y(10), y(10)-98, y(10)-98++, y(10)++, y(11), y(11)-98++, y(11)++, y(12)-98++, y(12)++, y(13)++, y(13)-98++, y(14)-98++, y(15)-98++, y(16)-98++, y(17)-98++, y(17)++

**Precursor origin neutral loss:** +

## Peptide No.391

HEEEEWYSEEEER

**Confirmed sites:** @S:9

**Ambiguous sites:**

MS/MS Fragmentation of **HEEEEWYSEEEER**

Found in **TITIN\_MOUSE**, Titin OS=Mus musculus GN=Ttn PE=1 SV=1

Match to Query 5542: 1988.731942 from(995.373247,2+)

Title: Elution from: 35.208 to 35.208 scan no 3018 cid35.00 polarity:+:MA10:m1s



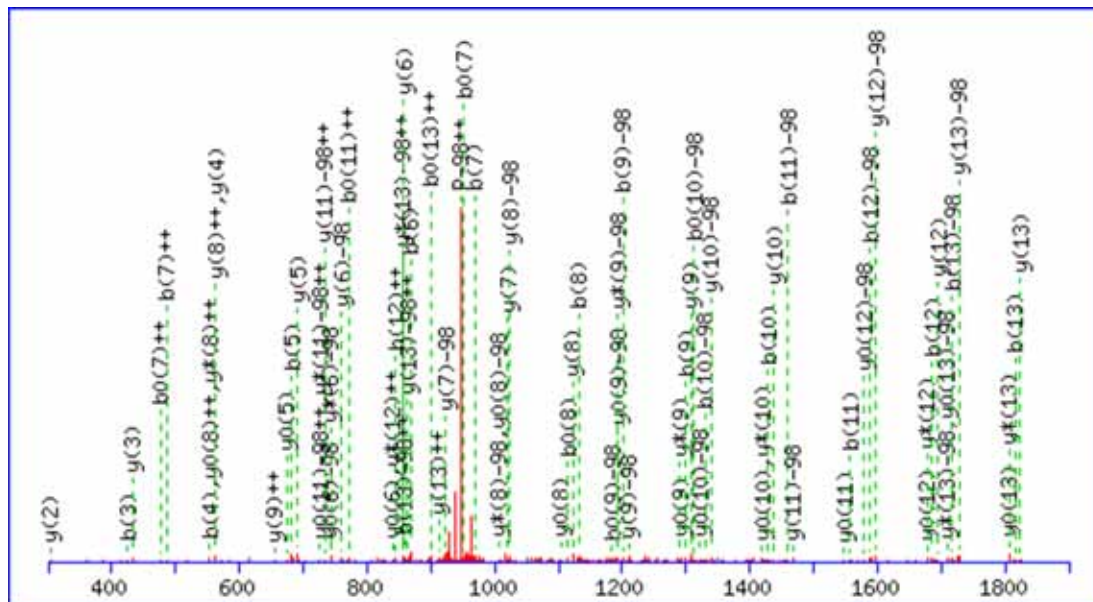

**Monoisotopic mass of neutral peptide Mr(calc):** 1988.7312

**Fixed modifications:** Carbamidomethyl (C) (apply to specified residues or termini only)

**Variable modifications:**

**N-term :** Dimethyl (N-term)

**S9 :** Phospho (ST), with neutral losses 97.9769(shown in table), 0.0000

**Ions Score:** 51 **Expect:** 0.00011

**Matched b ions:** b(3), b(4), b(5), b(6), b(7)++, b(7), b(8), b(9)-98, b(9), b(10)-98, b(10), b(11)-98, b(11), b(12), b(12)-98, b(12)++, b(13)-98, b(13), b(13)-98++

**Matched y ions:** y(2), y(3), y(4), y(5), y(6)-98, y(6), y(7)-98, y(7), y(8)++, y(8), y(8)-98, y(9), y(9)-98, y(9)++, y(10)-98, y(10), y(11)-98, y(11)-98++, y(12)-98, y(12), y(13)-98, y(13), y(13)-98++, y(13)++

**Precursor origin neutral loss:** +

## Peptide No.392

**HGRDDSFDSLDSFGSR**

**Confirmed sites:** @S:6

**Ambiguous sites:**

MS/MS Fragmentation of **HGRDDSFDSLDSFGSR**

Found in **LIMC1\_MOUSE**, LIM and calponin homology domains-containing protein 1 OS=Mus musculus  
GN=Limch1 PE=1 SV=2

Match to Query 4535: 1904.769027 from(635.930285,3+)

Title: Elution from: 41.941 to 41.941 scan no 3738 cid35.00 polarity:+MA10

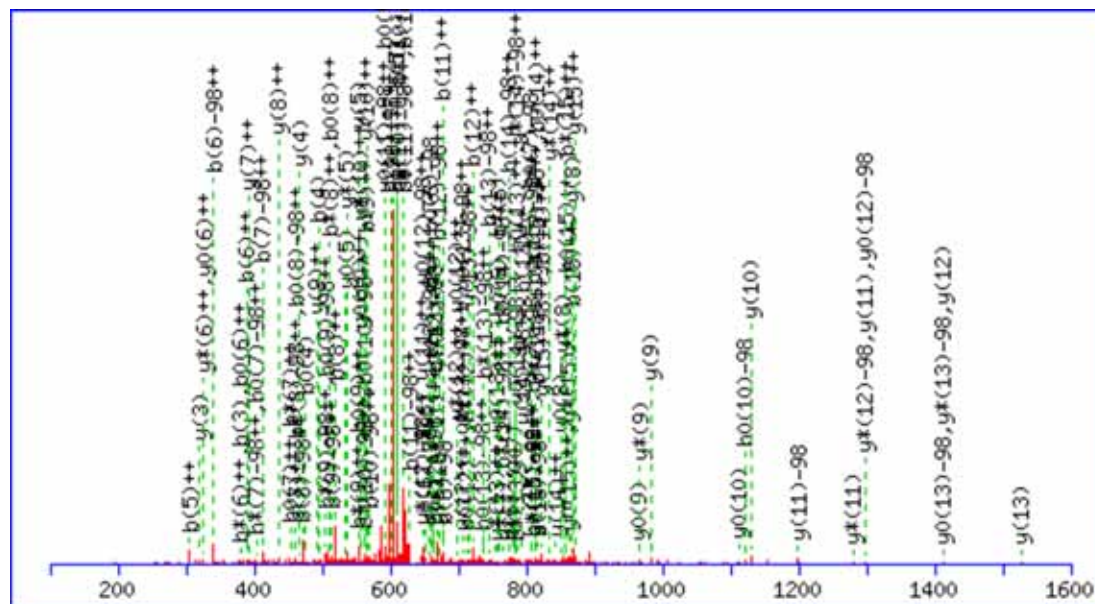

**Monoisotopic mass of neutral peptide Mr(calc):** 1904.7690

**Fixed modifications:** Carbamidomethyl (C) (apply to specified residues or termini only)

**Variable modifications:**

**N-term :** Dimethyl (N-term)

**S6 :** Phospho (ST), with neutral losses 0.0000(shown in table), 97.9769

**Ions Score:** 32 **Expect:** 0.016

**Matched b ions:** b(3), b(4), b(5)++, b(5), b(6)-98++, b(6)++, b(6), b(6)-98, b(7)-98++, b(7)++, b(8)-98++, b(8)++, b(9)-98++, b(9)++, b(10)++, b(10)-98++, b(11)-98++, b(11)++, b(12)++, b(12)-98++, b(13)-98++, b(13)++, b(14)++, b(14)-98++, b(15)++, b(15)-98++

**Matched y ions:** y(3), y(4), y(5), y(6), y(7), y(7)++, y(8), y(8)++, y(9), y(9)++, y(10), y(10)++, y(11)-98, y(11), y(11)-98++, y(11)++, y(12), y(12)-98++, y(12)++, y(13), y(13)-98++, y(14)-98++, y(14)++, y(15)-98++, y(15)++

**Precursor origin neutral loss:** +

## Peptide No.393

**HGSGADSDYENTQSGDPLLGLEK**

**Confirmed sites:** @S:3

**Ambiguous sites:**

MS/MS Fragmentation of **HGSGADSDYENTQSGDPLLGLEK**

Found in **GIT1\_MOUSE**, ARF GTPase-activating protein GIT1 OS=Mus musculus GN=Git1 PE=1 SV=1

Match to Query 7821: 2582.120253 from(861.714027,3+)

Title: Elution from: 50.248 to 50.248 scan no 4947 cid35.00 polarity:+:MA10:m1s



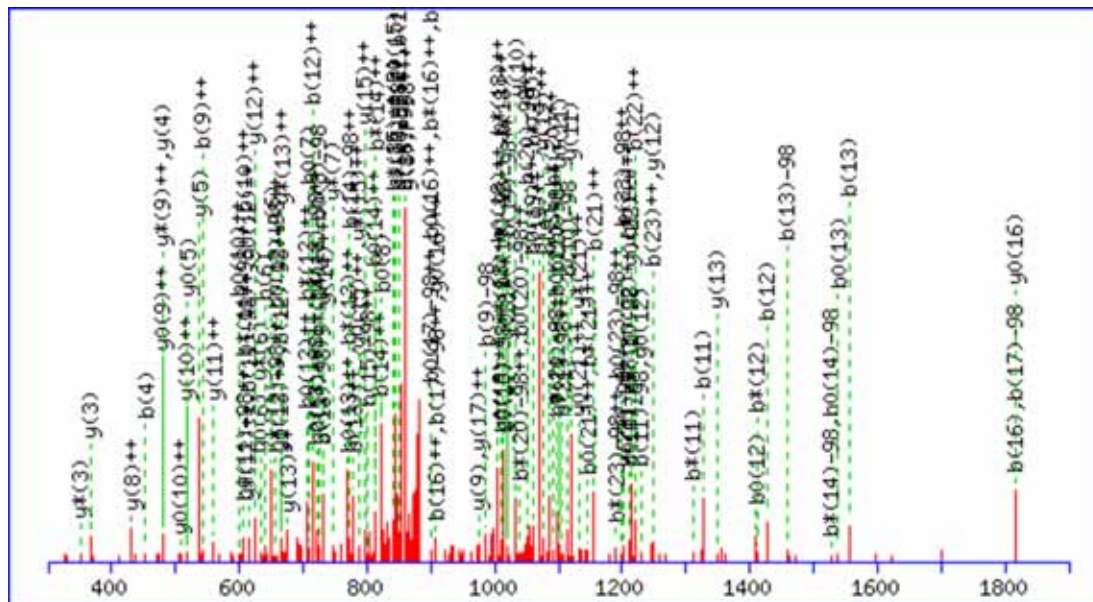

**Monoisotopic mass of neutral peptide Mr(calc):** 2674.1473

**Fixed modifications:** Carbamidomethyl (C) (apply to specified residues or termini only)

**Variable modifications:**

**N-term :** Dimethyl:2H(4)13C(2) (N-term)

**S3 :** Phospho (ST), with neutral losses 0.0000(shown in table), 97.9769

**Y9 :** Phospho (Y)

**K24 :** Dimethyl:2H(4)13C(2) (K)

**Ions Score:** 59 **Expect:** 7.9e-005

**Matched b ions:** b(4), b(6), b(8), b(9), b(9)-98, b(9)++, b(10), b(10)-98, b(10)++, b(10)-98, b(11), b(11)-98, b(11)-98, b(12)++, b(12), b(12)-98, b(12)-98, b(13), b(13)-98, b(13)++, b(13)-98, b(13)-98, b(14)++, b(14)-98, b(14)-98, b(15)-98, b(15)++, b(16), b(16)-98, b(16)++, b(17)-98, b(17)-98, b(17)-98, b(18)++, b(19)++, b(19)-98, b(20)++, b(20)-98, b(21)++, b(21)-98, b(21)++, b(22)++, b(23)++, b(23)-98

**Matched y ions:** y(3), y(4), y(5), y(6), y(8)++, y(8), y(9), y(10)++, y(10), y(11), y(11)++, y(12)++, y(12), y(13)++, y(13), y(14)++, y(15)++, y(17)++, y(18)++, y(19)++, y(23)-98

**Precursor origin neutral loss:** +

## Peptide No.395

**HIKEEPLSEEEPCTSTAVPSPEK**

**Confirmed sites:** @S:8,@S:20

**Ambiguous sites:**

MS/MS Fragmentation of **HIKEEPLSEEEPCTSTAVPSPEK**

Found in **NOP58\_MOUSE**, Nucleolar protein 58 OS=Mus musculus GN=Nop58 PE=1 SV=1

Match to Query 8353: 2837.248806 from(946.756878,3+)

Title: Elution from: 38.930 to 38.930 scan no 3522 cid35.00 polarity:+:MA10:m1s



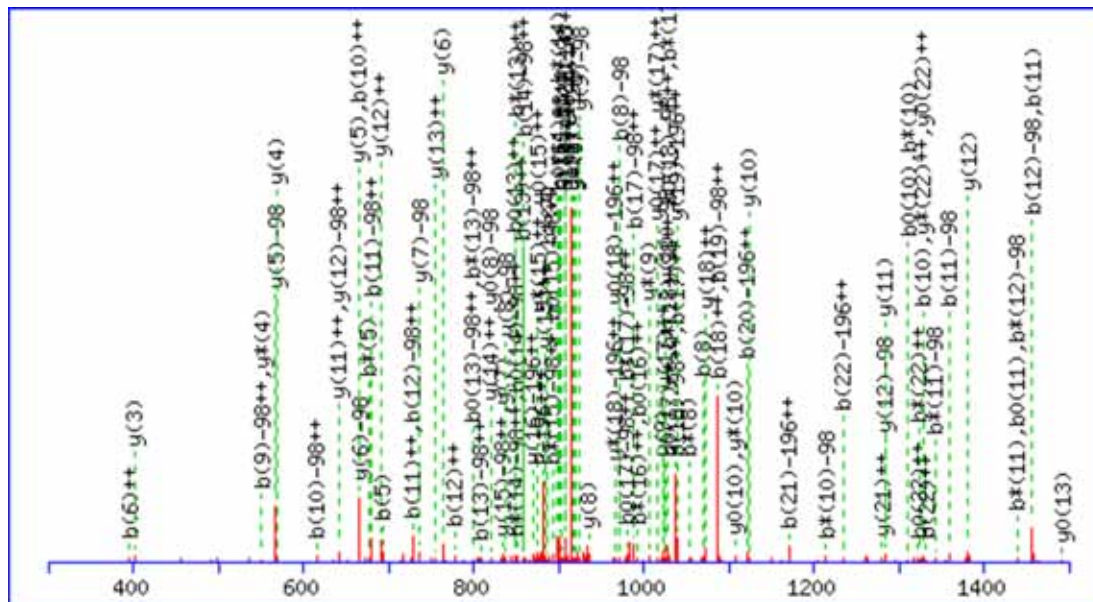

**Monoisotopic mass of neutral peptide Mr(calc):** 2837.2483

**Fixed modifications:** Carbamidomethyl (C) (apply to specified residues or termini only)

**Variable modifications:**

**N-term :** Dimethyl (N-term)

**K3 :** Dimethyl (K)

**S8 :** Phospho (ST), with neutral losses 97.9769(shown in table), 0.0000

**S20 :** Phospho (ST), with neutral losses 97.9769(shown in table), 0.0000

**K23 :** Dimethyl (K)

**Ions Score:** 55 **Expect:** 0.0003

**Matched b ions:** b(5), b(6)++, b(7), b(8), b(8)-98, b(9)-98++, b(10)++, b(10), b(10)-98++, b(11)++, b(11), b(11)-98++, b(11)-98, b(12)-98++, b(12)-98, b(12)++, b(13)-98++, b(13)++, b(14)++, b(14)-98++, b(15)-98++, b(17)++, b(17)-98++, b(18)++, b(18)-98++, b(19)-98++, b(20)-98++, b(20)-196++, b(21)-196++, b(22)-98++, b(22)-196++, b(22)++

**Matched y ions:** y(3), y(4), y(5)-98, y(5), y(6), y(6)-98, y(7)-98, y(7), y(8)-98, y(8), y(9)-98, y(9), y(10), y(10)-98, y(11)++, y(11), y(12)-98, y(12), y(12)++, y(12)-98++, y(13)++, y(14)++, y(15)-98++, y(15)++, y(16)-196++, y(16)-98++, y(17)++, y(18)++, y(18)-98++, y(19)-196++, y(19)-98++, y(21)++

**Precursor origin neutral loss:** +

## Peptide No.396

**HIVNHDDVFEESEELSSDEEMK**

**Confirmed sites:** @S:16,@S:17

**Ambiguous sites:**

MS/MS Fragmentation of **HIVNHDDVFEESEELSSDEEMK**

Found in **LAP2\_MOUSE**, Protein LAP2 OS=Mus musculus GN=ErbB2ip PE=1 SV=2

Match to Query 6719: 2849.104671 from(950.708833,3+)

Title: Elution from: 43.829 to 43.829 scan no 3853 cid35.00 polarity:+:MA10:m1s

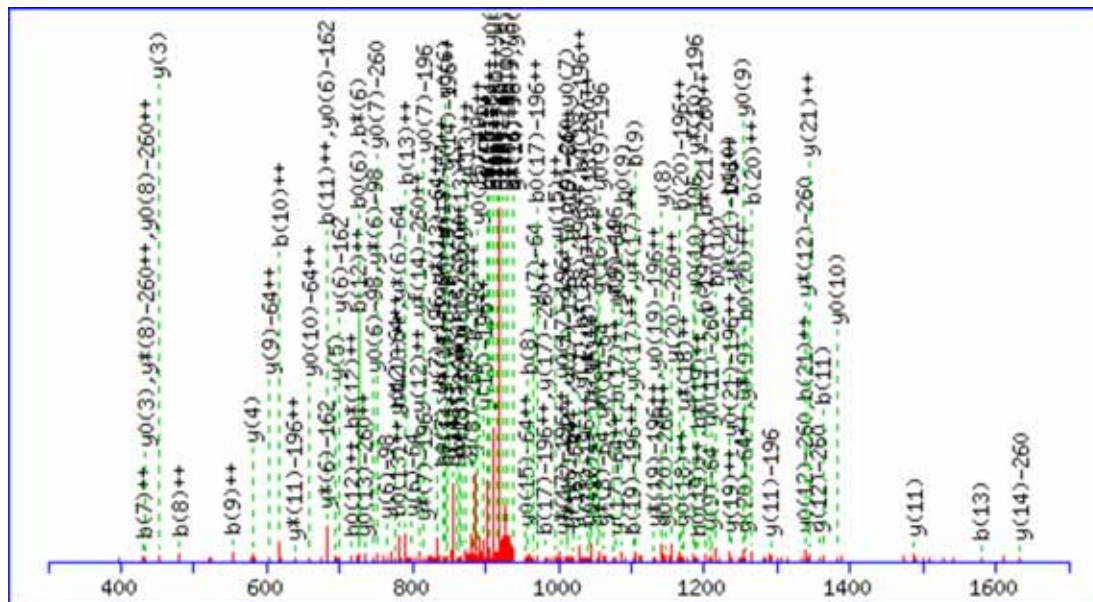

**Monoisotopic mass of neutral peptide Mr(calc):** 2849.1027

**Fixed modifications:** Carbamidomethyl (C) (apply to specified residues or termini only)

**Variable modifications:**

**N-term :** Dimethyl (N-term)

**S16 :** Phospho (ST), with neutral losses 0.0000(shown in table), 97.9769

**S17 :** Phospho (ST), with neutral losses 0.0000(shown in table), 97.9769

**M21 :** Oxidation (M), with neutral losses 0.0000(shown in table), 63.9983

**K22 :** Dimethyl (K)

**Ions Score:** 48 **Expect:** 0.00068

**Matched b ions:** b(7)++, b(8)++, b(8), b(9)++, b(9), b(10)++, b(10), b(11)++, b(11), b(12)++, b(13)++, b(13), b(14)++, b(15)++, b(17)-98++, b(17)++, b(17)-196++, b(18)-98++, b(18)-196++, b(19)++, b(19)-98++, b(19)-196++, b(20)-98++, b(20)-196++, b(20)++, b(21)++, b(21)-98++

**Matched y ions:** y(3), y(4), y(5), y(6)-98, y(6), y(7), y(7)-196, y(7)-98, y(8)-98, y(8), y(8)-98++, y(9)-196, y(9)-98, y(11), y(11)-98++, y(11)-98, y(11)-196, y(12)-98++, y(12)++, y(13)++, y(13)-98++, y(14)-98++, y(14)-196++, y(15)-196++, y(15)++, y(16)-98++, y(16)++, y(17)-196++, y(18)-98++, y(19)-98++, y(19)++, y(20)-98++, y(21)++

**Precursor origin neutral loss:** +

## Peptide No.397

**HNQDSQHCSLSGDEEDELFK**

**Confirmed sites:** @S:11

**Ambiguous sites:**

MS/MS Fragmentation of **HNQDSQHCSLSGDEEDELFK**

Found in **FKB15\_MOUSE**, FK506-binding protein 15 OS=Mus musculus GN=Fkbp15 PE=1 SV=2

Match to Query 7557: 2510.006985 from(837.676271,3+)

Title: Elution from: 41.105 to 41.105 scan no 3811 cid35.00 polarity:+:MA10:m1s

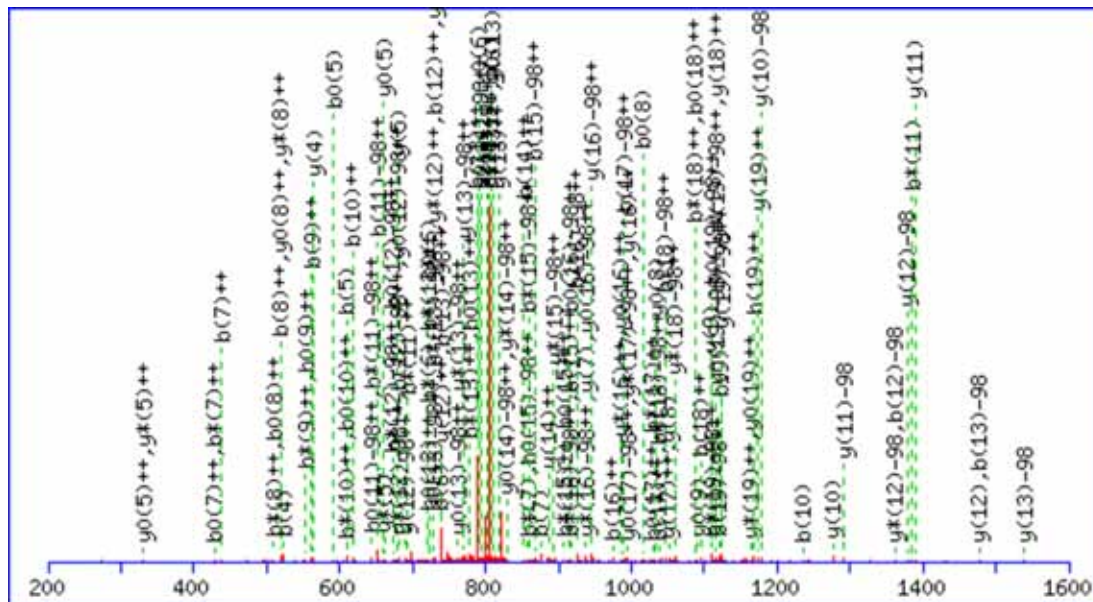

**Monoisotopic mass of neutral peptide Mr(calc):** 2510.0057

**Fixed modifications:** Carbamidomethyl (C) (apply to specified residues or termini only)

**Variable modifications:**

**N-term :** Dimethyl (N-term)

**S11 :** Phospho (ST), with neutral losses 97.9769(shown in table), 0.0000

**K20 :** Dimethyl (K)

**Ions Score:** 42 **Expect:** 0.0025

**Matched b ions:** b(4), b(5), b(6), b(7)++, b(7), b(8)++, b(9)++, b(9), b(10)++, b(10), b(11)-98++, b(12)-98, b(12)-98++, b(12)++, b(13)-98++, b(13)-98, b(13)++, b(14)-98++, b(14)++, b(15)-98++, b(15)++, b(16)-98++, b(16)++, b(17)-98++, b(17)++, b(18)-98++, b(18)++, b(19)++, b(19)-98++

**Matched y ions:** y(4), y(5), y(6), y(7), y(8), y(9), y(10)-98, y(10), y(11)-98, y(11), y(12)++, y(12), y(12)-98, y(12)-98++, y(13)-98, y(13)-98++, y(13)++, y(14)++, y(16)++, y(16)-98++, y(17)++, y(18)++, y(19)-98++, y(19)++

**Precursor origin neutral loss:** +

## Peptide No.398

**HQGVVMGMGQKDSYVGDEAQS**K

**Confirmed sites:** @S:13

**Ambiguous sites:**

MS/MS Fragmentation of **HQGVVMGMGQKDSYVGDEAQS**K

Found in **ACTA\_MOUSE**, Actin, aortic smooth muscle OS=Mus musculus GN=Acta2 PE=1 SV=1

Match to Query 6184: 2546.121957 from(849.714595,3+)

Title: Elution from: 27.192 to 27.192 scan no 1682 cid35.00 polarity:+:MA10:m1s

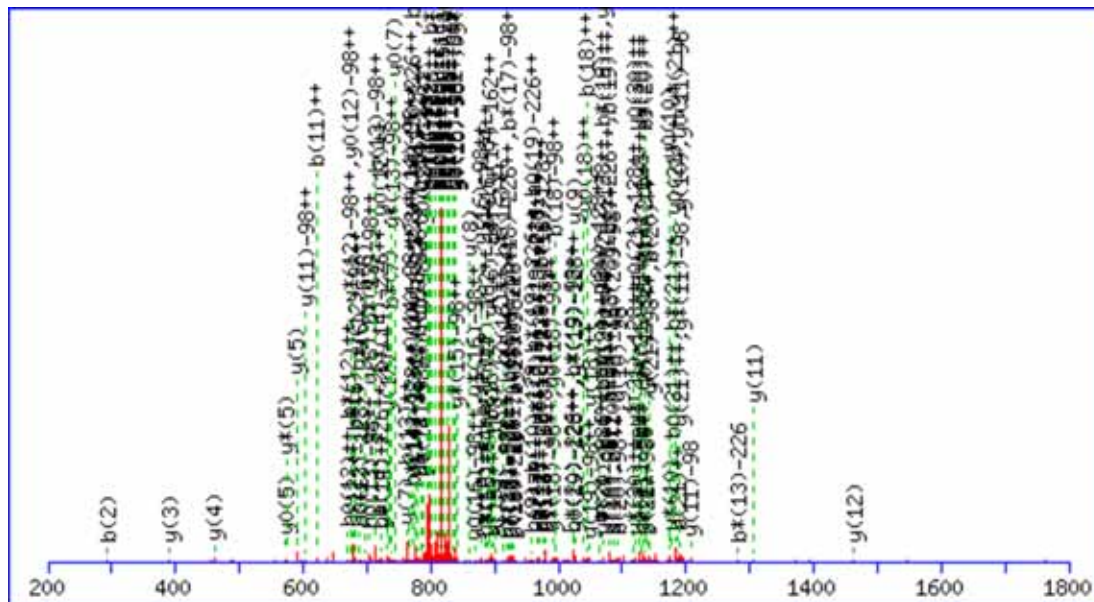

**Monoisotopic mass of neutral peptide Mr(calc):** 2546.1182

**Fixed modifications:** Carbamidomethyl (C) (apply to specified residues or termini only)

**Variable modifications:**

**N-term :** Dimethyl (N-term)

**M5 :** Oxidation (M), with neutral losses 0.0000(shown in table), 63.9983

**M8 :** Oxidation (M), with neutral losses 0.0000(shown in table), 63.9983

**K11 :** Dimethyl (K)

**S13 :** Phospho (ST), with neutral losses 0.0000(shown in table), 97.9769

**K22 :** Dimethyl (K)

**Ions Score:** 41 **Expect:** 0.0067

**Matched b ions:** b(2), b(6), b(8), b(9), b(10), b(11)++, b(12)++, b(13)++, b(13)-98++, b(14)-98++, b(15)++, b(16)++, b(17)++, b(17)-98++, b(18)++, b(18)-98++, b(19)++, b(20)++, b(20)-98++, b(21)-98++, b(21)++

**Matched y ions:** y(3), y(4), y(5), y(6), y(7), y(8), y(9), y(10), y(10)-98, y(11)-98, y(11), y(11)-98++, y(12), y(12)-98++, y(12)++, y(13)++, y(14)-98++, y(14)++, y(15)++, y(16)++, y(16)-98++, y(17)-98++, y(17)++, y(18)++, y(19)-98++, y(20)-98++, y(20)++, y(21)++, y(21)-98++

**Precursor origin neutral loss:** +

## Peptide No.399

**HQGVMVGMGQKDSYVGDEAQS**K

**Confirmed sites:** @S:13

**Ambiguous sites:**

MS/MS Fragmentation of **HQGVMVGMGQKDSYVGDEAQS**K

Found in **ACTA\_MOUSE**, Actin, aortic smooth muscle OS=Mus musculus GN=Acta2 PE=1 SV=1

Match to Query 6239: 2564.215888 from(642.061248,4+)

Title: Elution from: 27.177 to 27.177 scan no 1680 cid35.00 polarity:+:MA10:m1s



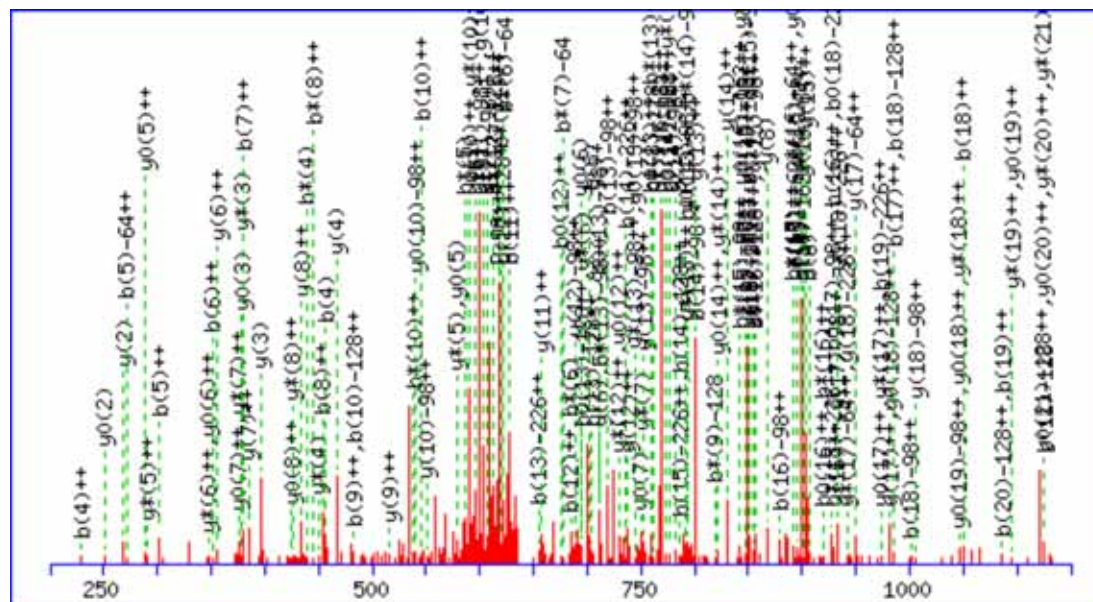

**Monoisotopic mass of neutral peptide Mr(calc):** 2564.2137

**Fixed modifications:** Carbamidomethyl (C) (apply to specified residues or termini only)

**Variable modifications:**

**N-term :** Dimethyl:2H(4)13C(2) (N-term)

**M5 :** Oxidation (M), with neutral losses 0.0000(shown in table), 63.9983

**M8 :** Oxidation (M), with neutral losses 0.0000(shown in table), 63.9983

**K11 :** Dimethyl:2H(4)13C(2) (K)

**S13 :** Phospho (ST), with neutral losses 0.0000(shown in table), 97.9769

**K22 :** Dimethyl:2H(4)13C(2) (K)

**Ions Score:** 66 **Expect:** 2.4e-005

**Matched b ions:** b(4), b(4)++, b(5)++, b(5), b(6)++, b(6), b(7)++, b(7), b(8)++, b(8), b(9)++, b(10)++, b(11)++, b(12)++, b(13)++, b(13)-98++, b(14)-98++, b(14)++, b(15)++, b(15)-98++, b(16)++, b(16)-98++, b(17)++, b(18)++, b(18)-98++, b(19)++

**Matched y ions:** y(2), y(3), y(4), y(5), y(6), y(6)++, y(7), y(7)++, y(8)++, y(8), y(9)++, y(10)++, y(10)-98++, y(11)-98++, y(11)++, y(12)++, y(12)-98++, y(13)++, y(13)-98++, y(14)++, y(14)-98++, y(15)++, y(15)-98++, y(16)++, y(17)++, y(17)-98++, y(18)-98++

**Precursor origin neutral loss:** +

## Peptide No.400

**HSGDFGADAQGAMSK**

**Confirmed sites:** @S:14

**Ambiguous sites:**

**MS/MS Fragmentation of HSGDFGADAQGAMSK**

Found in **MYG\_MOUSE**, Myoglobin OS=Mus musculus GN=Mb PE=1 SV=3

Match to Query 2565: 1629.649599 from(544.223809,3+)

Title: Elution from: 23.660 to 23.660 scan no 1344 cid35.00 polarity:+:MA10





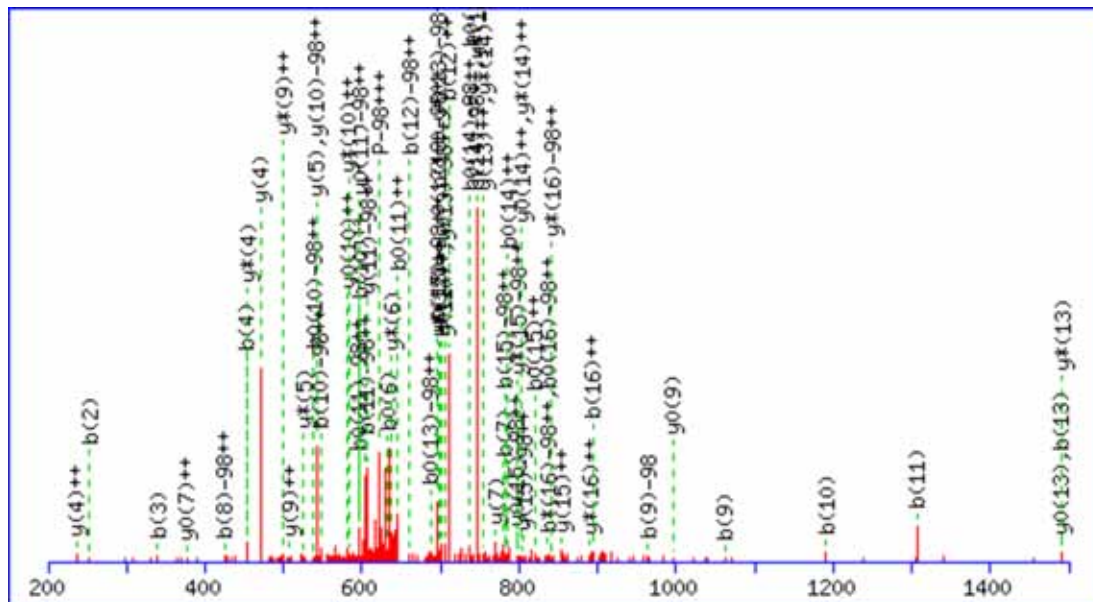

**Monoisotopic mass of neutral peptide Mr(calc):** 1959.8575

**Fixed modifications:** Carbamidomethyl (C) (apply to specified residues or termini only)

**Variable modifications:**

**N-term :** Dimethyl (N-term)

**S8 :** Phospho (ST), with neutral losses 0.0000(shown in table), 97.9769

**Ions Score:** 29 **Expect:** 0.053

**Matched b ions:** b(2), b(3), b(4), b(7), b(8)-98++, b(9)-98, b(9), b(10), b(10)-98++, b(10)++, b(11), b(11)-98++, b(12)++, b(12)-98++, b(13)++, b(13), b(13)-98++, b(14)-98++, b(15)-98++, b(16)++

**Matched y ions:** y(4)++, y(4), y(5), y(7), y(9)++, y(10)-98++, y(11)-98++, y(12)++, y(13)-98++, y(13)++, y(15)++, y(15)-98++

**Precursor origin neutral loss:** +

## Peptide No.403

**HSSLPTESDEDIAPAQR**

**Confirmed sites:** @T:6

**Ambiguous sites:**

MS/MS Fragmentation of **HSSLPTESDEDIAPAQR**

Found in **AP3D1\_MOUSE**, AP-3 complex subunit delta-1 OS=Mus musculus GN=Ap3d1 PE=1 SV=1

Match to Query 5425: 1959.858924 from(654.293584,3+)

Title: Elution from: 34.973 to 34.973 scan no 2985 cid35.00 polarity:+:MA10:m1s



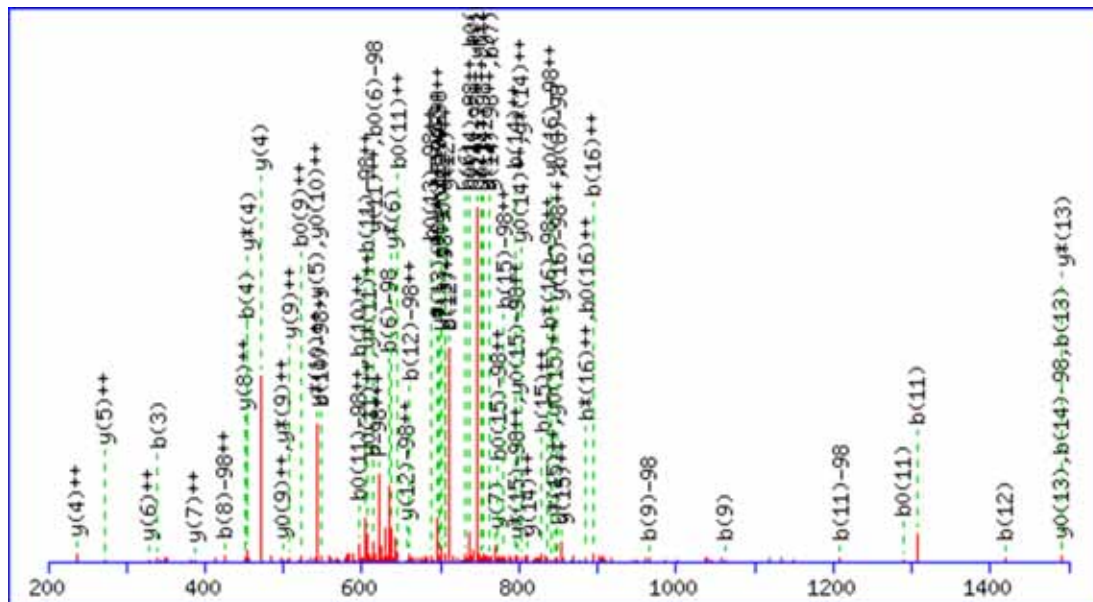

**Monoisotopic mass of neutral peptide Mr(calc):** 1959.8575

**Fixed modifications:** Carbamidomethyl (C) (apply to specified residues or termini only)

**Variable modifications:**

**N-term :** Dimethyl (N-term)

**T6 :** Phospho (ST), with neutral losses 97.9769(shown in table), 0.0000

**Ions Score:** 36 **Expect:** 0.012

**Matched b ions:** b(3), b(4), b(6)-98, b(6), b(7)-98, b(8)-98++, b(8)-98, b(9)-98, b(9), b(10)++, b(10)-98++, b(11)-98, b(11), b(11)-98++, b(12)++, b(12), b(12)-98++, b(13)++, b(13), b(13)-98++, b(14)-98++, b(14)-98, b(14)++, b(15)++, b(15)-98++, b(16)++

**Matched y ions:** y(4)++, y(4), y(5), y(5)++, y(6)++, y(7), y(7)++, y(8)++, y(9)++, y(11)++, y(12)-98++, y(12)++, y(13)++, y(13)-98++, y(14)-98++, y(14)++, y(15)++, y(16)-98++

**Precursor origin neutral loss:** +

## Peptide No.404

**HSSPHQSEDEEPR**

**Confirmed sites:** @S:3,@S:7

**Ambiguous sites:**

MS/MS Fragmentation of **HSSPHQSEDEEPR**

Found in **GYS1\_MOUSE**, Glycogen [starch] synthase, muscle OS=Mus musculus GN=Gys1 PE=1 SV=2

Match to Query 4671: 1850.651610 from(617.891146,3+)

Title: Elution from: 19.241 to 19.241 scan no 899 cid35.00 polarity:+:MA10:m1s

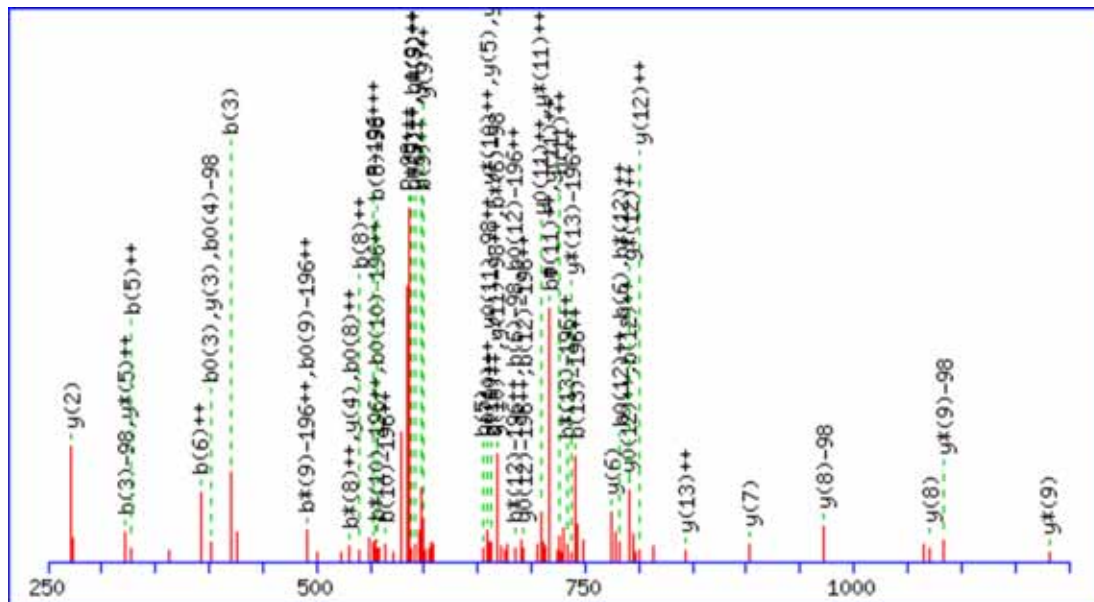

**Monoisotopic mass of neutral peptide Mr(calc):** 1850.6509

**Fixed modifications:** Carbamidomethyl (C) (apply to specified residues or termini only)

**Variable modifications:**

**N-term :** Dimethyl (N-term)

**S3 :** Phospho (ST), with neutral losses 0.0000(shown in table), 97.9769

**S7 :** Phospho (ST), with neutral losses 0.0000(shown in table), 97.9769

**Ions Score:** 38 **Expect:** 0.0016

**Matched b ions:** b(3), b(3)-98, b(5)++, b(5)-98, b(5), b(6)++, b(6), b(6)-98, b(7)-98++, b(8)-98++, b(8)++, b(9)-98++, b(9)++, b(10)-196++, b(10)++, b(11)++, b(11)-98++, b(12)++, b(12)-98++, b(12)-196++, b(13)-98++, b(13)-196++

**Matched y ions:** y(2), y(3), y(4), y(5), y(6), y(7), y(8)-98, y(8), y(9)++, y(10)++, y(11)++, y(11)-98++, y(12)++, y(13)-98++, y(13)++

**Precursor origin neutral loss:** +

## Peptide No.405

**HSSPHQSEDEEEPRDGPLGEDSER**

**Confirmed sites:** @S:2,@S:7

**Ambiguous sites:**

**MS/MS Fragmentation of HSSPHQSEDEEEPRDGPLGEDSER**

Found in **GYS1\_MOUSE**, Glycogen [starch] synthase, muscle OS=Mus musculus GN=Gys1 PE=1 SV=2

Match to Query 6584: 2906.104287 from(969.708705,3+)

Title: Elution from: 28.031 to 28.031 scan no 1885 cid35.00 polarity:+:MA10:m1s







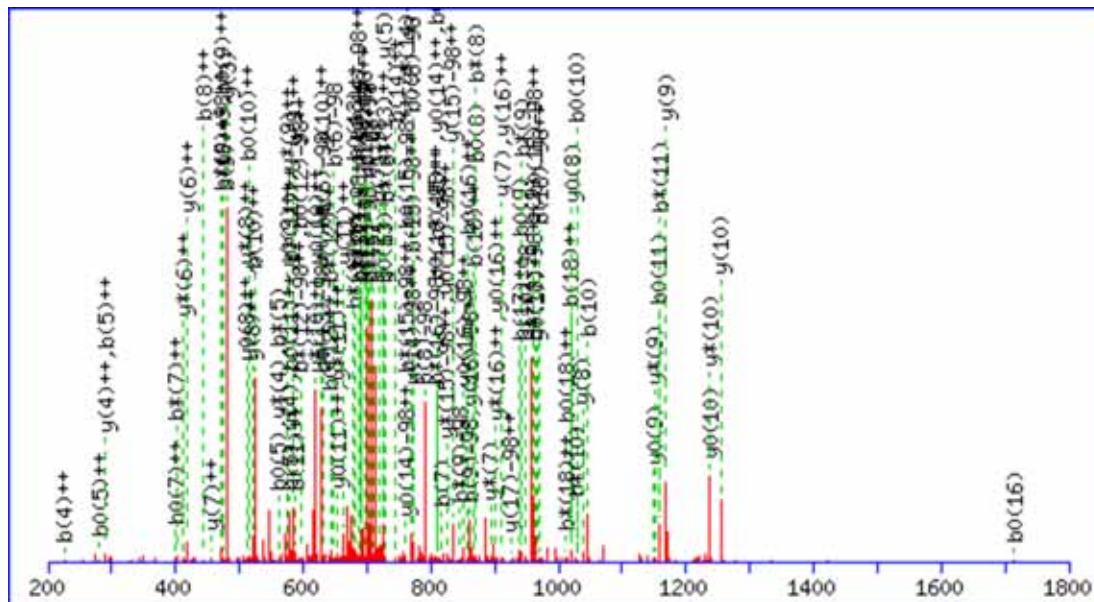

**Monoisotopic mass of neutral peptide Mr(calc):** 2212.9612

**Fixed modifications:** Carbamidomethyl (C) (apply to specified residues or termini only)

**Variable modifications:**

**N-term :** Dimethyl (N-term)

**S6 :** Phospho (ST), with neutral losses 97.9769(shown in table), 0.0000

**Ions Score:** 35 **Expect:** 0.02

**Matched b ions:** b(4)++, b(5)++, b(5), b(6)-98, b(7)-98, b(7), b(8)-98, b(8)++, b(9)++, b(9)-98, b(9), b(10)++, b(10), b(10)-98++, b(10)-98, b(11)++, b(13)++, b(14)-98++, b(14)++, b(15)-98++, b(16)++, b(17)++, b(18)++, b(18)-98++

**Matched y ions:** y(3), y(4)++, y(4), y(5), y(6)++, y(7)++, y(7), y(8)++, y(8), y(9), y(9)++, y(10), y(10)++, y(11)++, y(12)++, y(14)-98++, y(15)-98++, y(16)-98++, y(16)++, y(17)-98++

**Precursor origin neutral loss:** +

## Peptide No.408

**HYGGLTGLNK**

**Confirmed sites:** @Y:2

**Ambiguous sites:**

**MS/MS Fragmentation of** **HYGGLTGLNK**

Found in **PGAM1\_MOUSE**, Phosphoglycerate mutase 1 OS=Mus musculus GN=Pgam1 PE=1 SV=3

Match to Query 957: 1194.579576 from(598.297064,2+)

Title: Elution from: 27.700 to 27.700 scan no 1843 cid35.00 polarity:+:MA10

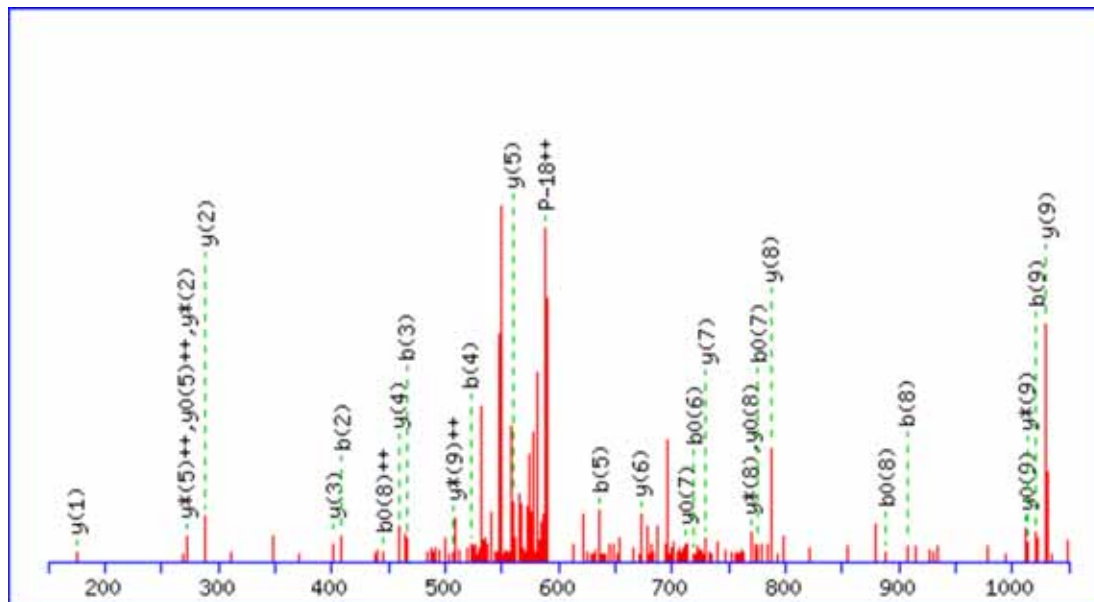

**Monoisotopic mass of neutral peptide Mr(calc):** 1194.5798

**Fixed modifications:** Carbamidomethyl (C) (apply to specified residues or termini only)

**Variable modifications:**

**N-term :** Dimethyl (N-term)

**Y2 :** Phospho (Y)

**K10 :** Dimethyl (K)

**Ions Score:** 39 **Expect:** 0.0026

**Matched b ions:** b(2), b(3), b(4), b(5), b(8), b(9)

**Matched y ions:** y(1), y(2), y(3), y(4), y(5), y(6), y(7), y(8), y(9)

**Precursor origin neutral loss:** +

## Peptide No.409

**HYGGLTGLNK**

**Confirmed sites:** @Y:2

**Ambiguous sites:**

**MS/MS Fragmentation of** **HYGGLTGLNK**

Found in **PGAM1\_MOUSE**, Phosphoglycerate mutase 1 OS=Mus musculus GN=Pgam1 PE=1 SV=3

Match to Query 852: 1206.644090 from(604.329321,2+)

Title: Elution from: 27.611 to 27.611 scan no 1796 cid35.00 polarity:+:MA10

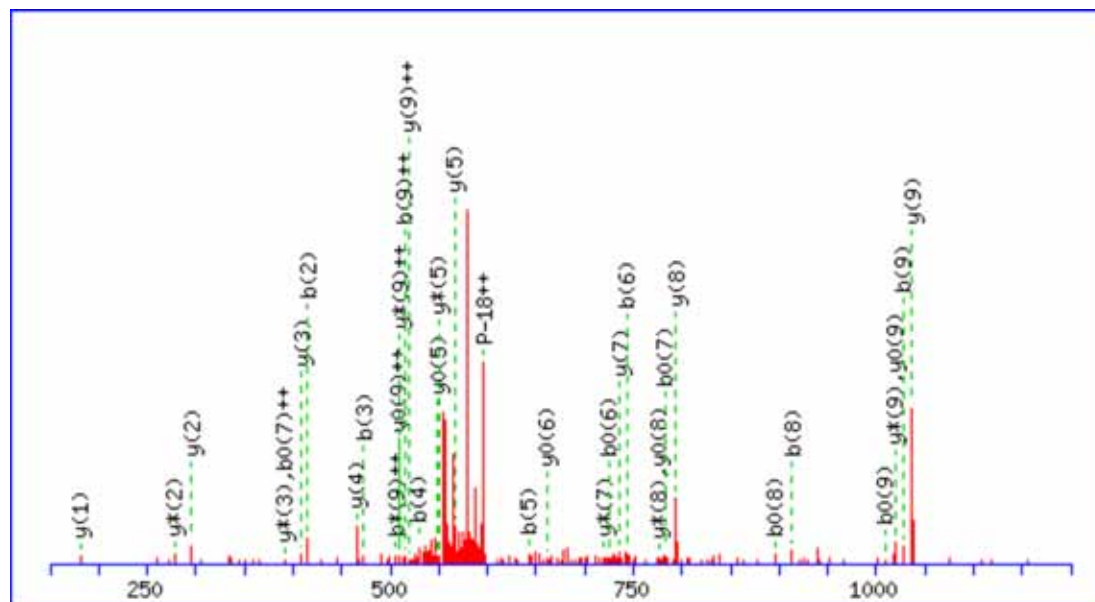

**Monoisotopic mass of neutral peptide Mr(calc):** 1206.6434

**Fixed modifications:** Carbamidomethyl (C) (apply to specified residues or termini only)

**Variable modifications:**

**N-term :** Dimethyl:2H(4)13C(2) (N-term)

**Y2 :** Phospho (Y)

**K10 :** Dimethyl:2H(4)13C(2) (K)

**Ions Score:** 39 **Expect:** 0.0048

**Matched b ions:** b(2), b(3), b(4), b(5), b(6), b(8), b(9), b(9)++

**Matched y ions:** y(1), y(2), y(3), y(4), y(5), y(7), y(8), y(9), y(9)++

**Precursor origin neutral loss:** +

## Peptide No.410

**IACDEEFSDSEDEGEGGR**

**Confirmed sites:** @S:8,@S:10

**Ambiguous sites:**

**MS/MS Fragmentation of IACDEEFSDSEDEGEGGR**

Found in **HDAC2\_MOUSE**, Histone deacetylase 2 OS=Mus musculus GN=Hdac2 PE=1 SV=1

Match to Query 6490: 2188.719490 from(1095.367021,2+)

Title: Elution from: 37.154 to 37.154 scan no 3283 cid35.00 polarity:+:MA10

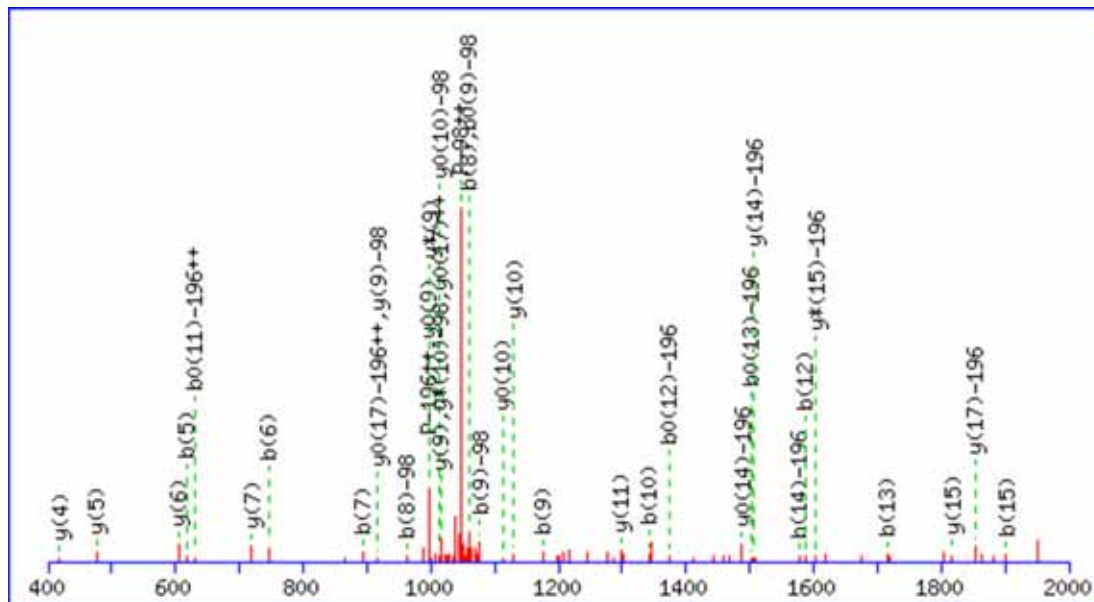

**Monoisotopic mass of neutral peptide Mr(calc):** 2188.7181

**Fixed modifications:** Carbamidomethyl (C) (apply to specified residues or termini only)

**Variable modifications:**

**N-term :** Dimethyl (N-term)

**S8 :** Phospho (ST), with neutral losses 0.0000(shown in table), 97.9769

**S10 :** Phospho (ST), with neutral losses 0.0000(shown in table), 97.9769

**Ions Score:** 36 **Expect:** 0.0016

**Matched b ions:** b(5), b(6), b(7), b(8)-98, b(8), b(9), b(9)-98, b(10), b(10)-98, b(11)-98, b(12)-98, b(12), b(13)-98, b(13), b(14)-196, b(14)-98, b(15)-98, b(15)

**Matched y ions:** y(4), y(5), y(6), y(7), y(9)-98, y(9), y(10), y(11), y(11)-98, y(12)-98, y(14)-98, y(14)-196, y(15), y(15)-98, y(17)-196, y(17)-98

**Precursor origin neutral loss:** +

## Peptide No.411

**IACEEEFSDSDEEGEGGRK**

**Confirmed sites:** @S:8,@S:10

**Ambiguous sites:**

MS/MS Fragmentation of **IACEEEFSDSDEEGEGGRK**

Found in **HDAC1\_MOUSE**, Histone deacetylase 1 OS=Mus musculus GN=Hdac1 PE=1 SV=1

Match to Query 6259: 2358.862518 from(787.294782,3+)

Title: Elution from: 33.185 to 33.185 scan no 2539 cid35.00 polarity:+:MA10:m1s



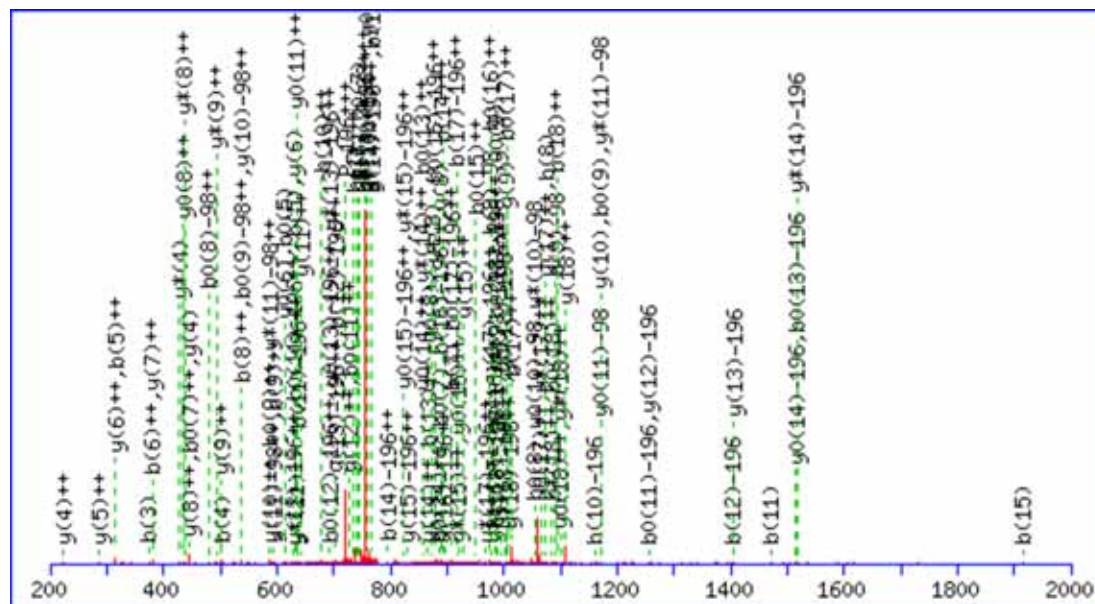

**Monoisotopic mass of neutral peptide Mr(calc):** 2358.8600

**Fixed modifications:** Carbamidomethyl (C) (apply to specified residues or termini only)

**Variable modifications:**

**N-term :** Dimethyl (N-term)

**S8 :** Phospho (ST), with neutral losses 97.9769(shown in table), 0.0000

**S10 :** Phospho (ST), with neutral losses 97.9769(shown in table), 0.0000

**K19 :** Dimethyl (K)

**Ions Score:** 45 **Expect:** 0.00065

**Matched b ions:** b(3), b(4), b(5)++, b(5), b(6)++, b(6), b(7), b(8)++, b(8)-98, b(8), b(9)++, b(9)-98, b(10)-98, b(10)-196, b(10)++, b(10)-98++, b(11), b(11)-98, b(11)-196++, b(11)-98++, b(11)++, b(12)-196++, b(12)-98++, b(12)-196, b(13)-196++, b(13)-98++, b(13)++, b(14)-98++, b(14)-196++, b(14)++, b(15), b(15)-98++, b(16)-196++, b(16)-98++, b(17)++, b(17)-196++, b(17)-98++, b(18)-98++, b(18)++

**Matched y ions:** y(4), y(4)++, y(5)++, y(6)++, y(6), y(7)++, y(7), y(8)++, y(8), y(9)++, y(9), y(10)-98++, y(10), y(10)++, y(11)-98++, y(11)++, y(12)-98++, y(12)-196, y(12)-196++, y(12)++, y(13)-196++, y(13)-196, y(13)-98++, y(14)-196++, y(14)-98++, y(14)++, y(15)-98++, y(15)-196++, y(15)++, y(16)-196++, y(16)-98++, y(16)++, y(17)-196++, y(17)-98++, y(17)++, y(18)-196++, y(18)-98++, y(18)++

**Precursor origin neutral loss:** +

## Peptide No.412

**IAIITQREESPPPAVPEIPK**

**Confirmed sites:** @S:10

**Ambiguous sites:**

**MS/MS Fragmentation of IAIITQREESPPPAVPEIPK**

Found in **TITIN\_MOUSE**, Titin OS=Mus musculus GN=Ttn PE=1 SV=1

Match to Query 7695: 2320.245828 from(774.422552,3+)

Title: Elution from: 48.975 to 48.975 scan no 4830 cid35.00 polarity+:MA10:m1s

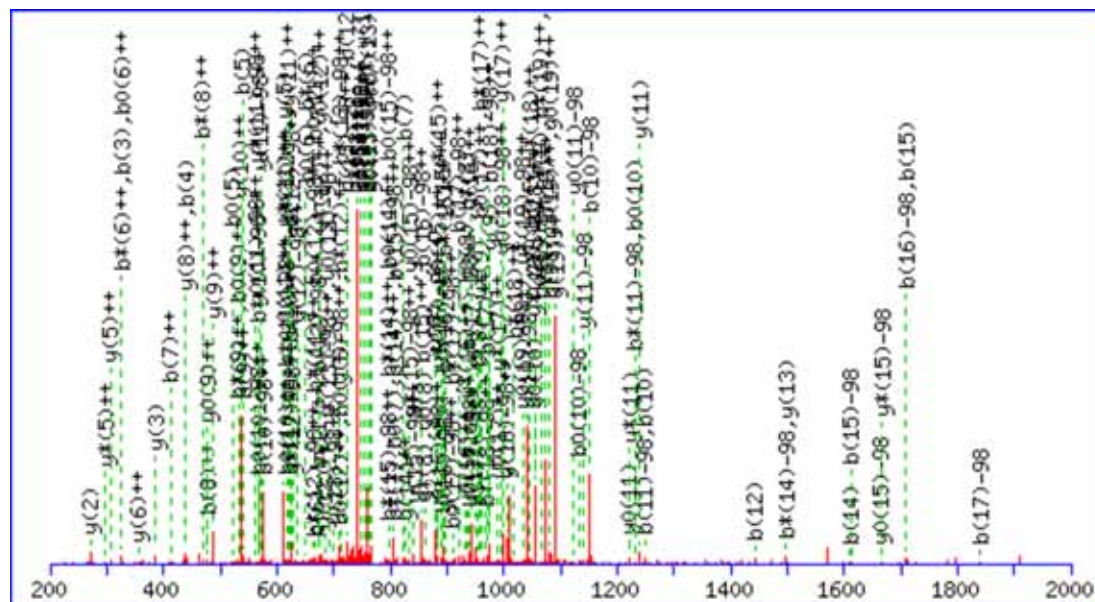

**Monoisotopic mass of neutral peptide Mr(calc):** 2320.2443

**Fixed modifications:** Carbamidomethyl (C) (apply to specified residues or termini only)

**Variable modifications:**

**N-term :** Dimethyl (N-term)

**S10 :** Phospho (ST), with neutral losses 97.9769(shown in table), 0.0000

**K20 :** Dimethyl (K)

**Ions Score:** 53 **Expect:** 0.00028

**Matched b ions:** b(3), b(4), b(5), b(6), b(7)++, b(7), b(8)++, b(8), b(9)++, b(9), b(10)-98, b(10), b(10)-98++, b(10)++, b(11)-98, b(11)++, b(11)-98++, b(12), b(12)++, b(12)-98++, b(13)-98++, b(14), b(14)++, b(14)-98++, b(15)++, b(15), b(15)-98++, b(15)-98, b(16)-98++, b(16)-98, b(17)-98, b(17)-98++, b(17)++, b(18)-98++, b(19)++

**Matched y ions:** y(2), y(3), y(5), y(5)++, y(6), y(6)++, y(8), y(8)++, y(9)++, y(9), y(10)++, y(10), y(11), y(11)-98, y(11)-98++, y(11)++, y(12)-98++, y(12)++, y(13)++, y(13)-98++, y(13), y(14)++, y(15)-98++, y(15)++, y(16)++, y(16)-98++, y(17)++, y(17)-98++, y(18)-98++, y(18)++, y(19)++, y(19)-98++

**Precursor origin neutral loss:** +

## Peptide No.413

**IAITQREESPPPAVPEIPK**

**Confirmed sites:** @S:10

**Ambiguous sites:**

**MS/MS Fragmentation of IAITQREESPPPAVPEIPK**

Found in **TITIN\_MOUSE**, Titin OS=Mus musculus GN=Ttn PE=1 SV=1

Match to Query 6035: 2332.309488 from(778.443772,3+)

Title: Elution from: 49.134 to 49.134 scan no 4575 cid35.00 polarity:+:MA10:m1s

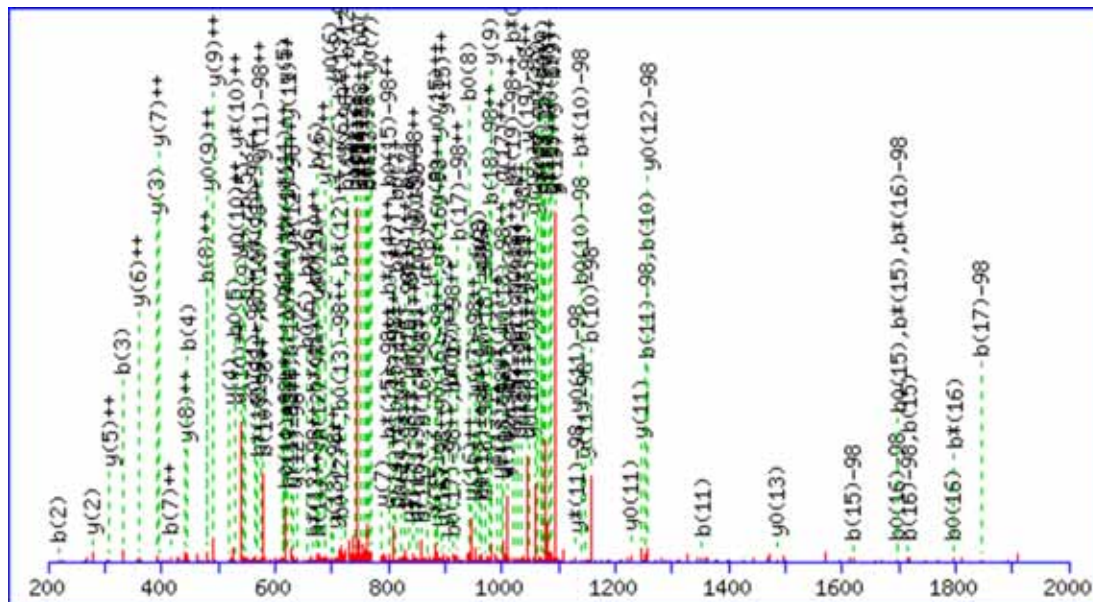

**Monoisotopic mass of neutral peptide Mr(calc):** 2332.3079

**Fixed modifications:** Carbamidomethyl (C) (apply to specified residues or termini only)

**Variable modifications:**

**N-term :** Dimethyl:2H(4)13C(2) (N-term)

**S10 :** Phospho (ST), with neutral losses 0.0000(shown in table), 97.9769

**K20 :** Dimethyl:2H(4)13C(2) (K)

**Ions Score:** 44 **Expect:** 0.0014

**Matched b ions:** b(2), b(3), b(4), b(5), b(6), b(7)++, b(7), b(8)++, b(8), b(9)++, b(9), b(10)-98, b(10)-98++, b(10)++, b(11)-98++, b(11)-98, b(11), b(11)++, b(12)-98++, b(12)++, b(13)-98++, b(14)++, b(14)-98++, b(15)++, b(15), b(15)-98, b(15)-98++, b(16)-98++, b(16)-98, b(16)++, b(17)-98, b(17)-98++, b(18)-98++, b(18)++, b(19)-98++, b(19)++

**Matched y ions:** y(2), y(3), y(4), y(5), y(5)++, y(6), y(6)++, y(7)++, y(7), y(8), y(8)++, y(9)++, y(9), y(10)++, y(10), y(11), y(11)-98++, y(11)++, y(11)-98, y(12)++, y(12)-98++, y(13)-98++, y(13)++, y(14)++, y(15)-98++, y(15)++, y(16)++, y(16)-98++, y(17)++, y(17)-98++, y(18)++, y(18)-98++, y(19)++, y(19)-98++

**Precursor origin neutral loss:** +

## Peptide No.414

**IAITQREESPPPAVPEIPK**

**Confirmed sites:** @T:5

**Ambiguous sites:**

**MS/MS Fragmentation of IAITQREESPPPAVPEIPK**

Found in **TITIN\_MOUSE**, Titin OS=Mus musculus GN=Ttn PE=1 SV=1

Match to Query 6259: 2332.310484 from(778.444104,3+)

Title: Elution from: 49.048 to 49.048 scan no 4569 cid35.00 polarity:+:MA10:m1s

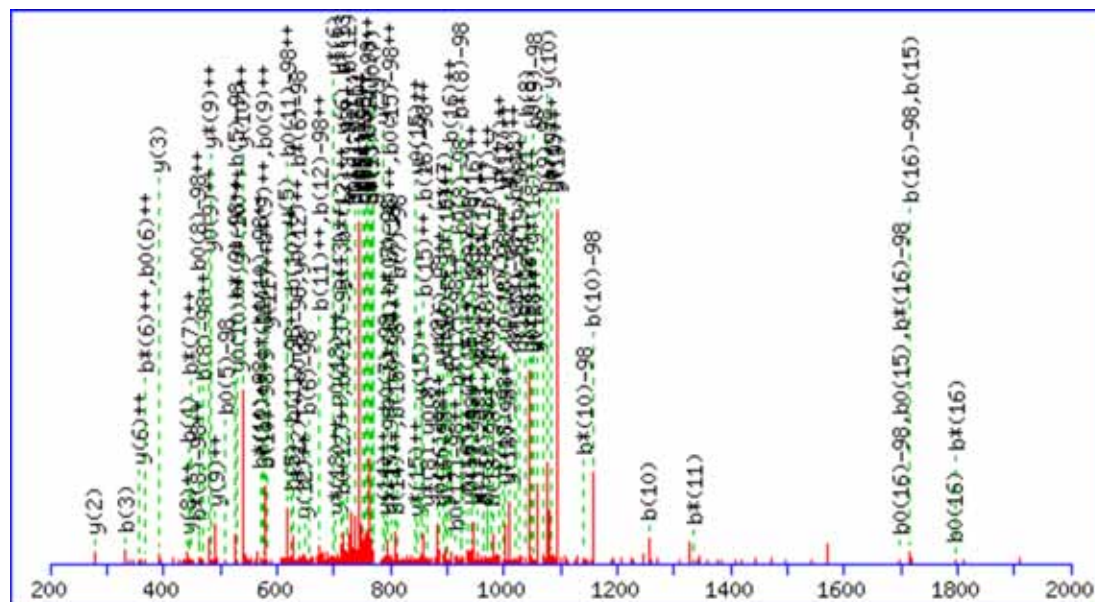

**Monoisotopic mass of neutral peptide Mr(calc):** 2332.3079

**Fixed modifications:** Carbamidomethyl (C) (apply to specified residues or termini only)

**Variable modifications:**

**N-term :** Dimethyl:2H(4)13C(2) (N-term)

**T5 :** Phospho (ST), with neutral losses 0.0000(shown in table), 97.9769

**K20 :** Dimethyl:2H(4)13C(2) (K)

**Ions Score:** 29 **Expect:** 0.042

**Matched b ions:** b(3), b(4), b(5)-98, b(5), b(6)-98, b(6), b(7)-98, b(8)-98, b(8)-98++, b(8), b(9)-98, b(10)-98++, b(10)++, b(10)-98, b(10), b(11)-98++, b(11)++, b(12)-98++, b(12)++, b(13)-98++, b(14)++, b(14)-98++, b(15)-98++, b(15), b(15)++, b(16)-98, b(16)-98++, b(16)++, b(17)++, b(18)-98++, b(18)++, b(19)-98++

**Matched y ions:** y(2), y(3), y(5), y(6)++, y(6), y(7), y(8)++, y(8), y(9)++, y(9), y(10)++, y(10), y(11)++, y(12)++, y(13)++, y(14)++, y(15)++, y(16)++, y(16)-98++, y(17)++, y(17)-98++, y(18)++, y(18)-98++, y(19)-98++, y(19)++

**Precursor origin neutral loss:** +

## Peptide No.415

**IDISPSTFR**

**Confirmed sites:** @S:4

**Ambiguous sites:**

**MS/MS Fragmentation of IDISPSTFR**

Found in **TR150\_MOUSE**, Thyroid hormone receptor-associated protein 3 OS=Mus musculus  
GN=Thrap3 PE=1 SV=1

Match to Query 977: 1142.538240 from(572.276396,2+)

Title: Elution from: 49.743 to 49.743 scan no 4887 cid35.00 polarity:+:MA10



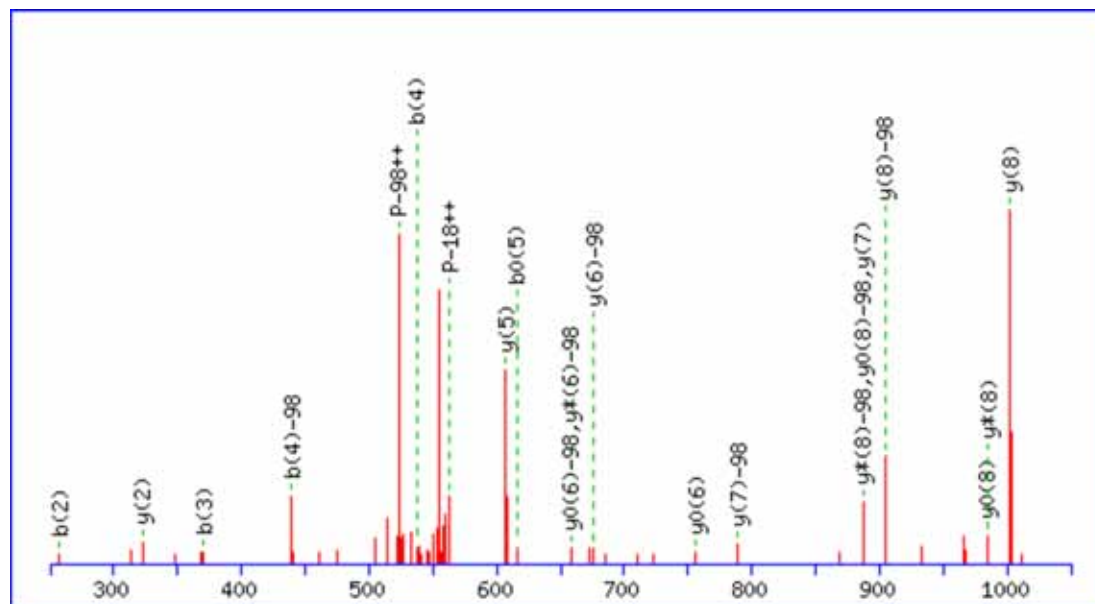

**Monoisotopic mass of neutral peptide Mr(calc):** 1142.5373

**Fixed modifications:** Carbamidomethyl (C) (apply to specified residues or termini only)

**Variable modifications:**

**N-term :** Dimethyl (N-term)

**S4 :** Phospho (ST), with neutral losses 97.9769(shown in table), 0.0000

**Ions Score:** 37 **Expect:** 0.0051

**Matched b ions:** b(2), b(3), b(4)-98, b(4)

**Matched y ions:** y(2), y(5), y(6)-98, y(7)-98, y(7), y(8)-98, y(8)

**Precursor origin neutral loss:** +

## Peptide No.416

**IDVSVEAASGGK**

**Confirmed sites:** @S:9

**Ambiguous sites:**

MS/MS Fragmentation of **IDVSVEAASGGK**

Found in **DLDH\_MOUSE**, Dihydrolipoyl dehydrogenase, mitochondrial OS=Mus musculus GN=Dld PE=1 SV=2

Match to Query 1321: 1267.607306 from(634.810929,2+)

Title: Elution from: 35.142 to 35.142 scan no 2839 cid35.00 polarity:+:MA10

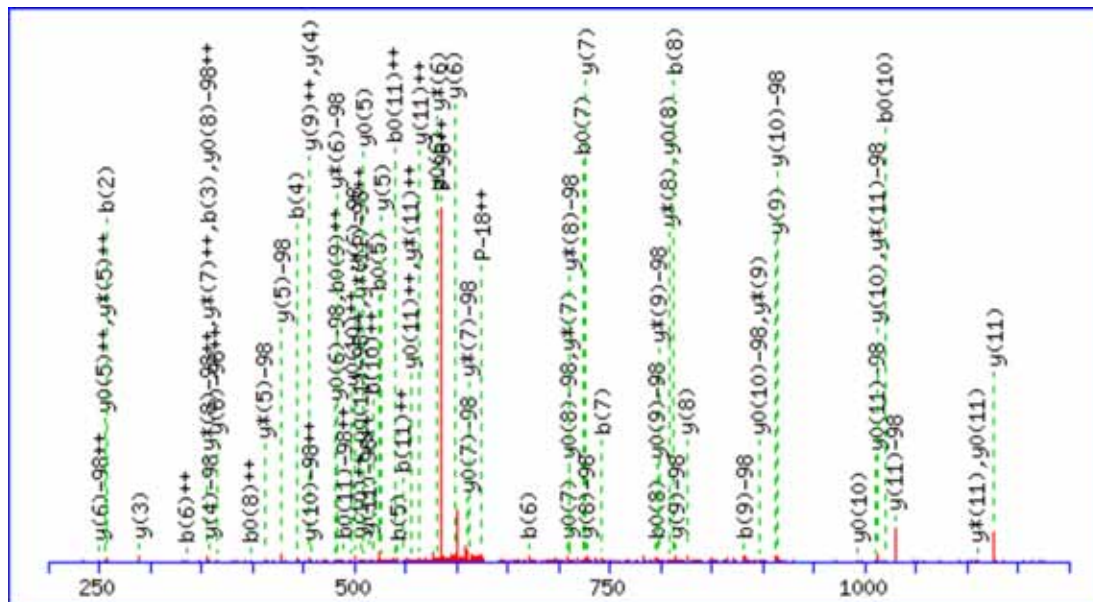

**Monoisotopic mass of neutral peptide Mr(calc):** 1267.6061

**Fixed modifications:** Carbamidomethyl (C) (apply to specified residues or termini only)

**Variable modifications:**

**N-term :** Dimethyl (N-term)

**S9 :** Phospho (ST), with neutral losses 97.9769(shown in table), 0.0000

**K12 :** Dimethyl (K)

**Ions Score:** 50 **Expect:** 0.00043

**Matched b ions:** b(2), b(3), b(4), b(5), b(6), b(6)++, b(7), b(8), b(9)-98, b(10)++, b(11)++

**Matched y ions:** y(3), y(4)-98, y(4), y(5)-98, y(5), y(6)-98, y(6)-98++, y(6), y(7), y(8)-98, y(8), y(8)-98++, y(9)-98, y(9), y(9)++, y(10)-98, y(10), y(10)-98++, y(10)++, y(11)-98, y(11), y(11)-98++, y(11)++

**Precursor origin neutral loss:** +

## Peptide No.417

**IDVSVEAASGGK**

**Confirmed sites:** @S:9

**Ambiguous sites:**

**MS/MS Fragmentation of IDVSVEAASGGK**

Found in **DLDH\_MOUSE**, Dihydrolipoyl dehydrogenase, mitochondrial OS=Mus musculus GN=Dld PE=1 SV=2

Match to Query 1208: 1279.669466 from(640.842009,2+)

Title: Elution from: 35.049 to 35.049 scan no 2782 cid35.00 polarity:+:MA10

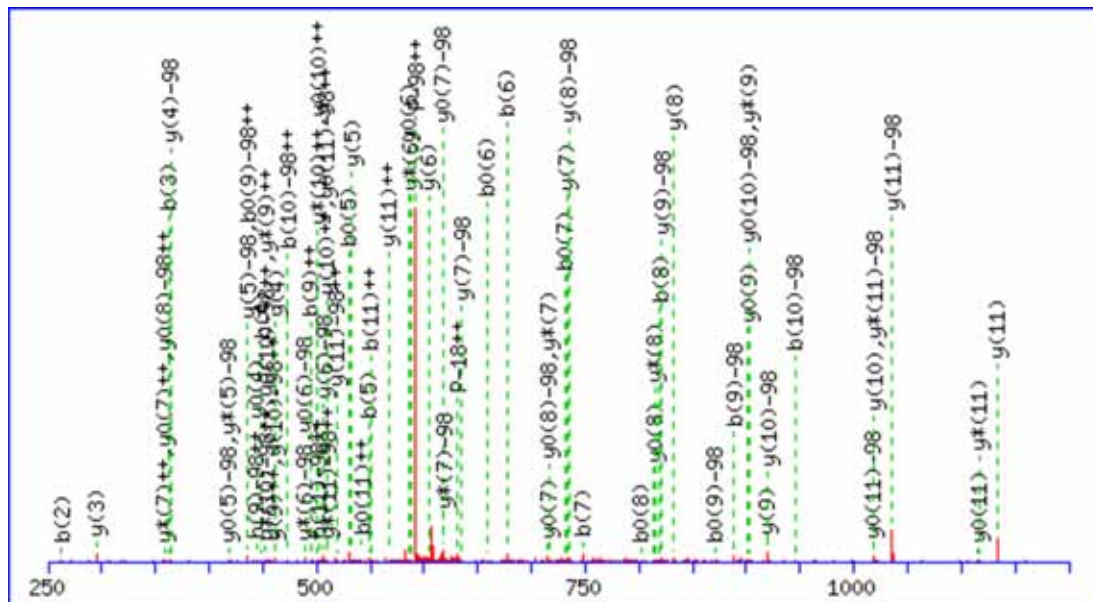

**Monoisotopic mass of neutral peptide Mr(calc):** 1279.6697

**Fixed modifications:** Carbamidomethyl (C) (apply to specified residues or termini only)

**Variable modifications:**

**N-term :** Dimethyl:2H(4)13C(2) (N-term)

**S9 :** Phospho (ST), with neutral losses 97.9769(shown in table), 0.0000

**K12 :** Dimethyl:2H(4)13C(2) (K)

**Ions Score:** 50 **Expect:** 0.00037

**Matched b ions:** b(2), b(3), b(4), b(5), b(6), b(7), b(8), b(9)-98, b(9)++, b(9)-98++, b(10)-98, b(10)-98++, b(11)-98++, b(11)++

**Matched y ions:** y(3), y(4), y(4)-98, y(5)-98, y(5), y(6)-98, y(6), y(7), y(7)-98, y(8), y(8)-98, y(9)-98, y(9), y(9)++, y(10)-98, y(10), y(10)-98++, y(10)++, y(11)-98, y(11), y(11)-98++, y(11)++

**Precursor origin neutral loss:** +

## Peptide No.418

**IEALPSDISIDEGK**

**Confirmed sites:** @S:9

**Ambiguous sites:**

**MS/MS Fragmentation of IEALPSDISIDEGK**

Found in **TITIN\_MOUSE**, Titin OS=Mus musculus GN=Ttn PE=1 SV=1

Match to Query 2160: 1621.787422 from(811.900987,2+)

Title: Elution from: 50.071 to 50.071 scan no 4601 cid35.00 polarity:+:MA10:m1s





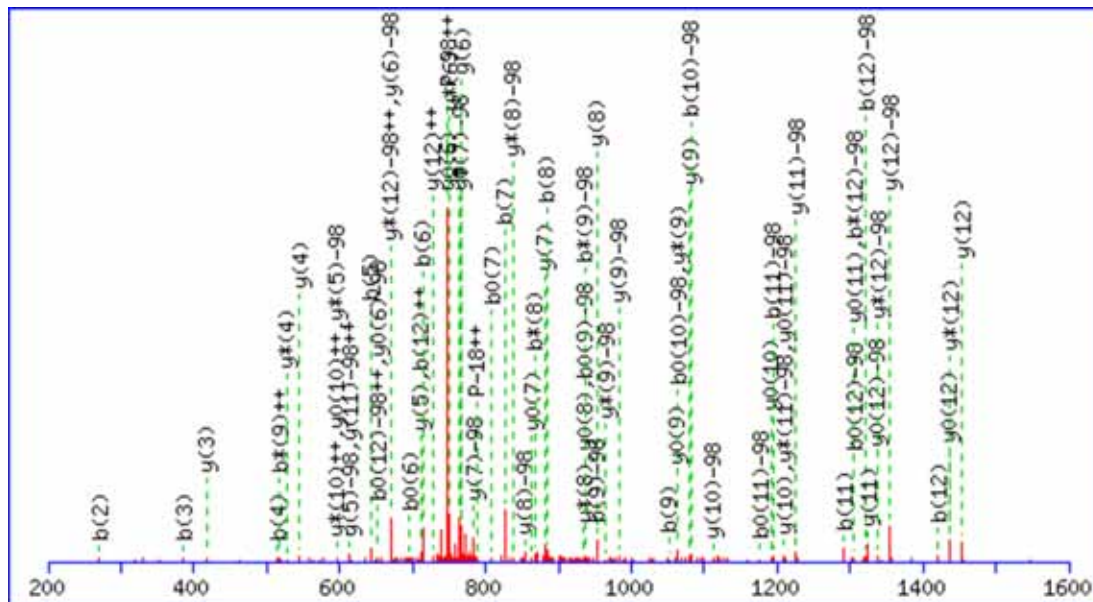

**Monoisotopic mass of neutral peptide Mr(calc):** 1593.7651

**Fixed modifications:** Carbamidomethyl (C) (apply to specified residues or termini only)

**Variable modifications:**

**N-term :** Dimethyl (N-term)

**S9 :** Phospho (ST), with neutral losses 97.9769(shown in table), 0.0000

**K13 :** Dimethyl (K)

**Ions Score:** 71 **Expect:** 4e-006

**Matched b ions:** b(2), b(3), b(4), b(5), b(6), b(7), b(8), b(9)-98, b(9), b(10)-98, b(11)-98, b(11), b(12), b(12)-98, b(12)++

**Matched y ions:** y(3), y(4), y(5)-98, y(5), y(6)-98, y(6), y(7), y(7)-98, y(8), y(8)-98, y(9), y(9)-98, y(10), y(10)-98, y(11)-98, y(11), y(11)-98++, y(12)-98, y(12), y(12)++

**Precursor origin neutral loss:** +

## Peptide No.420

**IEDVGSDEEDDSGK**

**Confirmed sites:** @S:6

**Ambiguous sites:**

MS/MS Fragmentation of **IEDVGSDEEDDSGK**

Found in **HS90B\_MOUSE**, Heat shock protein HSP 90-beta OS=Mus musculus GN=Hsp90ab1 PE=1 SV=2

Match to Query 3314: 1629.630422 from(815.822487,2+)

Title: Elution from: 27.312 to 27.312 scan no 1936 cid35.00 polarity:+:MA10

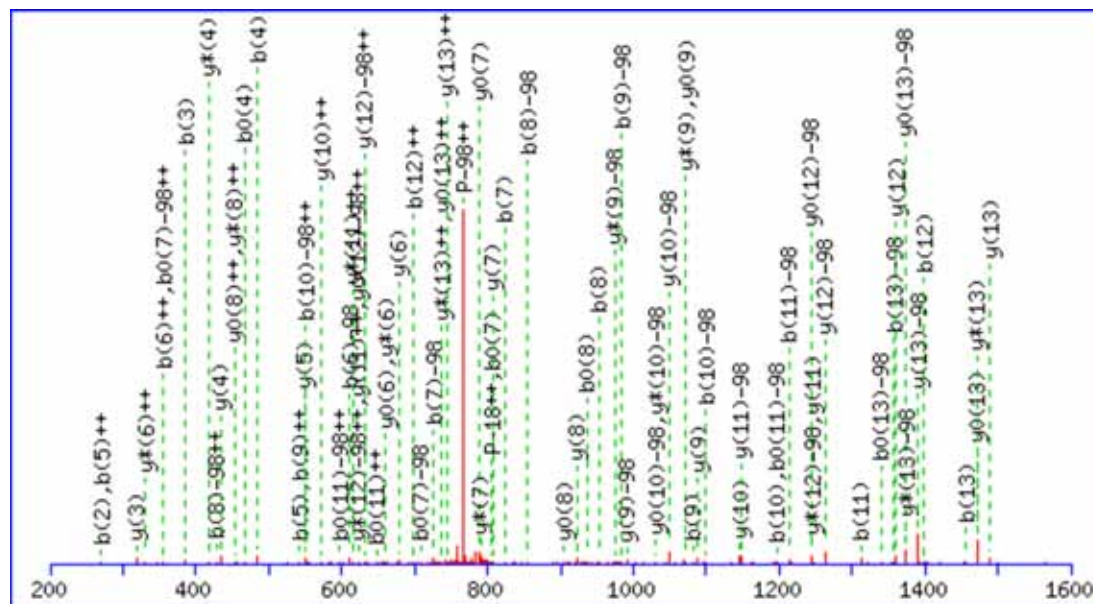

**Monoisotopic mass of neutral peptide Mr(calc):** 1629.6295

**Fixed modifications:** Carbamidomethyl (C) (apply to specified residues or termini only)

**Variable modifications:**

**N-term :** Dimethyl (N-term)

**S6 :** Phospho (ST), with neutral losses 97.9769(shown in table), 0.0000

**K14 :** Dimethyl (K)

**Ions Score:** 72 **Expect:** 1e-006

**Matched b ions:** b(2), b(3), b(4), b(5)++, b(5), b(6)-98, b(6)++, b(7)-98, b(7), b(8)-98, b(8)++, b(8), b(8)-98, b(9)++, b(9), b(9)-98, b(10), b(10)-98, b(10)-98++, b(10)-98, b(11), b(11)-98, b(12), b(12)++, b(13)-98, b(13)

**Matched y ions:** y(3), y(4), y(5), y(6), y(7), y(8), y(9)-98, y(9), y(10)-98, y(10), y(10)++, y(11)-98, y(11), y(11)++, y(12)-98, y(12), y(12)-98, y(13)-98, y(13), y(13)++

**Precursor origin neutral loss:** +

## Peptide No.421

**IEDVGSDEEDDSGK**

**Confirmed sites:** @S:6

**Ambiguous sites:**

**MS/MS Fragmentation of IEDVGSDEEDDSGK**

Found in **HS90B\_MOUSE**, Heat shock protein HSP 90-beta OS=Mus musculus GN=Hsp90ab1 PE=1 SV=2

Match to Query 2637: 1641.693848 from(821.854200,2+)

Title: Elution from: 27.219 to 27.219 scan no 1779 cid35.00 polarity:+:MA10

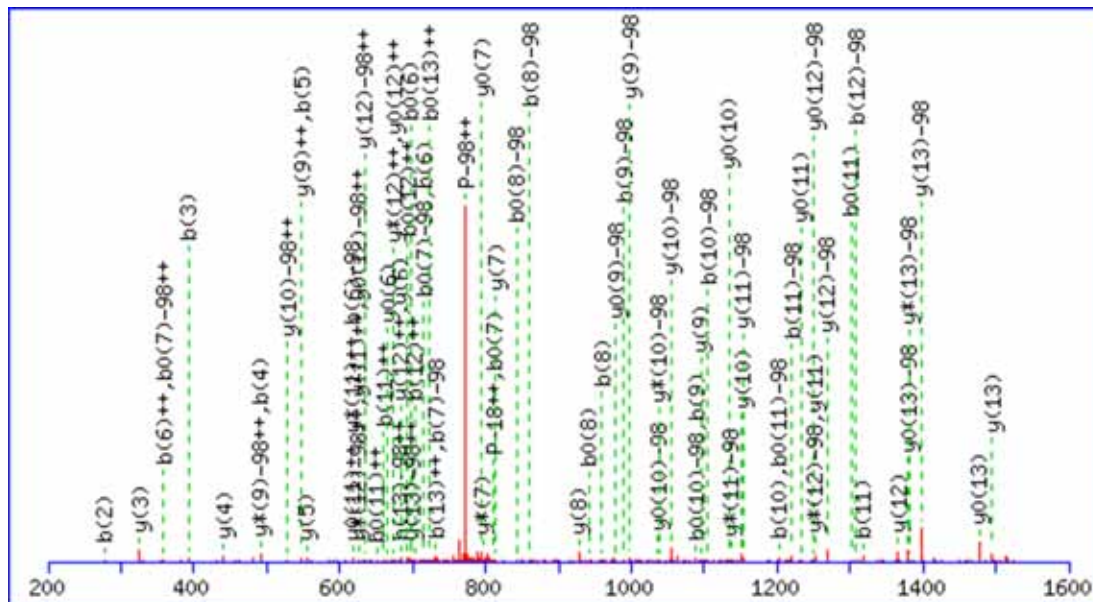

**Monoisotopic mass of neutral peptide Mr(calc):** 1641.6931

**Fixed modifications:** Carbamidomethyl (C) (apply to specified residues or termini only)

**Variable modifications:**

**N-term :** Dimethyl:2H(4)13C(2) (N-term)

**S6 :** Phospho (ST), with neutral losses 97.9769(shown in table), 0.0000

**K14 :** Dimethyl:2H(4)13C(2) (K)

**Ions Score:** 53 **Expect:** 0.00017

**Matched b ions:** b(2), b(3), b(4), b(5), b(6)-98, b(6)++, b(6), b(7)-98, b(8), b(8)-98, b(9), b(9)-98, b(10)-98, b(10), b(11), b(11)-98, b(11)++, b(12)++, b(12)-98, b(13)++, b(13)-98++

**Matched y ions:** y(3), y(4), y(5), y(6), y(7), y(8), y(9)++, y(9)-98, y(9), y(10)-98, y(10), y(10)-98++, y(11)-98, y(11), y(11)++, y(12)-98, y(12), y(12)-98++, y(12)++, y(13)-98, y(13), y(13)-98++

**Precursor origin neutral loss:** +

## Peptide No.422

**IEDVGSDEEDDSGKDK**

**Confirmed sites:** @S:6

**Ambiguous sites:**

MS/MS Fragmentation of **IEDVGSDEEDDSGKDK**

Found in **HS90B\_MOUSE**, Heat shock protein HSP 90-beta OS=Mus musculus GN=Hsp90ab1 PE=1 SV=2

Match to Query 5085: 1900.784307 from(634.602045,3+)

Title: Elution from: 25.238 to 25.238 scan no 1663 cid35.00 polarity:+:MA10







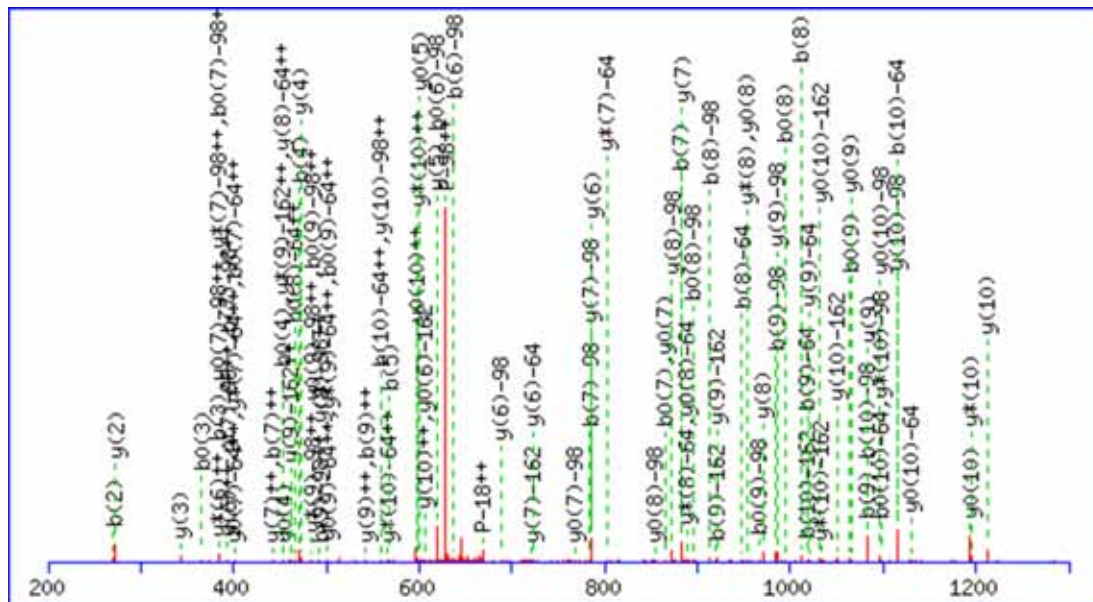

**Monoisotopic mass of neutral peptide Mr(calc):** 1352.6298

**Fixed modifications:** Carbamidomethyl (C) (apply to specified residues or termini only)

**Variable modifications:**

**N-term :** Dimethyl (N-term)

**S6 :** Phospho (ST), with neutral losses 97.9769(shown in table), 0.0000

**M7 :** Oxidation (M), with neutral losses 0.0000(shown in table), 63.9983

**K11 :** Dimethyl (K)

**Ions Score:** 65 **Expect:** 9e-006

**Matched b ions:** b(2), b(3), b(4), b(5), b(6)-98, b(7)++, b(7)-98++, b(7), b(7)-98, b(8), b(8)-98, b(9)-98, b(9), b(9)++, b(9)-98++, b(10)-98

**Matched y ions:** y(2), y(3), y(4), y(5), y(6)-98, y(6), y(6)++, y(7)-98, y(7), y(7)++, y(7)-98++, y(8)-98, y(8), y(9)-98, y(9), y(9)++, y(9)-98++, y(10)-98, y(10), y(10)-98++, y(10)++

**Precursor origin neutral loss:** +

## Peptide No.425

**IELSPSMEAPK**

**Confirmed sites:** @S:6

**Ambiguous sites:**

**MS/MS Fragmentation of IELSPSMEAPK**

Found in **TITIN\_MOUSE**, Titin OS=Mus musculus GN=Ttn PE=1 SV=1

Match to Query 1122: 1336.636058 from(669.325305,2+)

Title: Elution from: 42.487 to 42.487 scan no 3687 cid35.00 polarity:+:MA10

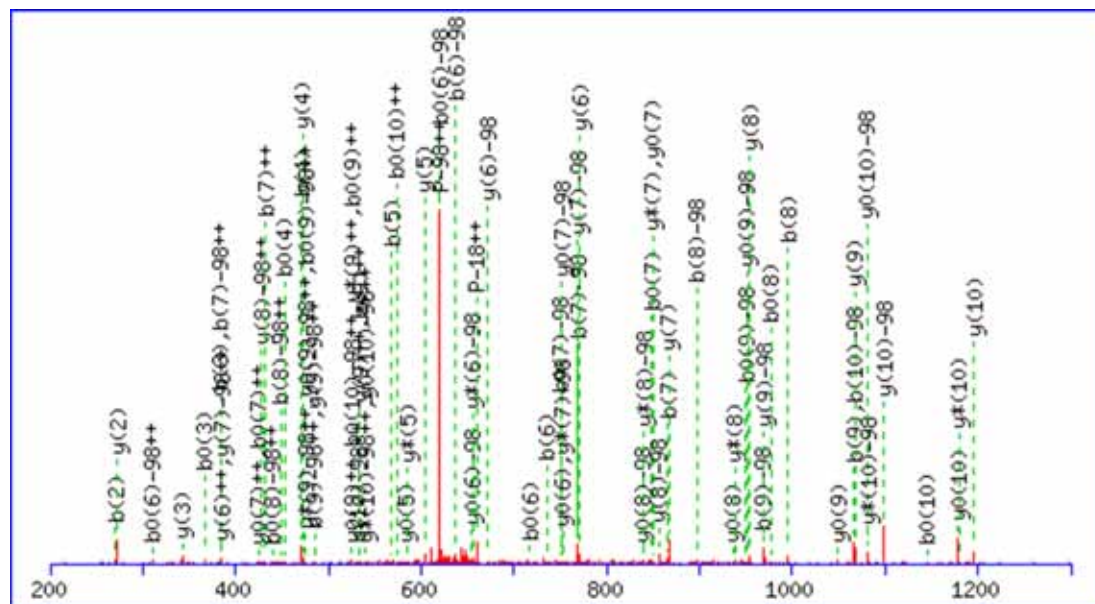

**Monoisotopic mass of neutral peptide Mr(calc):** 1336.6349

**Fixed modifications:** Carbamidomethyl (C) (apply to specified residues or termini only)

**Variable modifications:**

**N-term :** Dimethyl (N-term)

**S6 :** Phospho (ST), with neutral losses 97.9769(shown in table), 0.0000

**K11 :** Dimethyl (K)

**Ions Score:** 63 **Expect:** 1.6e-005

**Matched b ions:** b(2), b(3), b(4), b(5), b(6)-98, b(6), b(7)-98++, b(7)-98, b(7)++, b(7), b(8), b(8)-98, b(8)-98++, b(9), b(9)-98, b(9)-98++, b(9)++, b(10)-98, b(10)-98++

**Matched y ions:** y(2), y(3), y(4), y(5), y(6), y(6)++, y(6)-98, y(7)-98, y(7), y(7)-98++, y(8)-98, y(8), y(8)-98++, y(9)-98, y(9), y(9)-98++, y(9)++, y(10)-98, y(10)

**Precursor origin neutral loss:** +

## Peptide No.426

**IELSPSMEAPK**

**Confirmed sites:** @S:4,@S:6

**Ambiguous sites:**

MS/MS Fragmentation of **IELSPSMEAPK**

Found in **TITIN\_MOUSE**, Titin OS=Mus musculus GN=Ttn PE=1 SV=1

Match to Query 1956: 1444.661504 from(723.338028,2+)

Title: Elution from: 39.347 to 39.347 scan no 3388 cid35.00 polarity:+:MA10

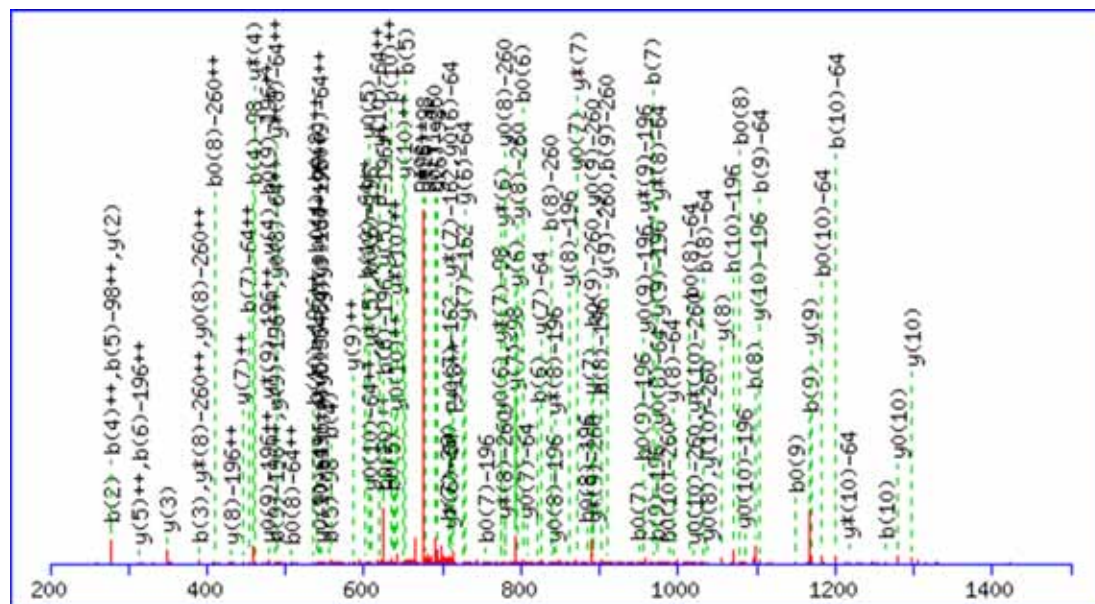

**Monoisotopic mass of neutral peptide Mr(calc):** 1444.6598

**Fixed modifications:** Carbamidomethyl (C) (apply to specified residues or termini only)

**Variable modifications:**

**N-term :** Dimethyl:2H(4)13C(2) (N-term)

**S4 :** Phospho (ST), with neutral losses 0.0000(shown in table), 97.9769

**S6 :** Phospho (ST), with neutral losses 0.0000(shown in table), 97.9769

**M7 :** Oxidation (M), with neutral losses 0.0000(shown in table), 63.9983

**K11 :** Dimethyl:2H(4)13C(2) (K)

**Ions Score:** 47 **Expect:** 0.00086

**Matched b ions:** b(2), b(3), b(4)++, b(4)-98, b(4), b(5)-98++, b(5)-98, b(5), b(6)-196, b(6)-196++, b(6), b(7)-98, b(7), b(8), b(8)-98, b(8)-196, b(9), b(9)-98, b(9)-98++, b(9)-196, b(9)-196++, b(10)-98, b(10)-196, b(10)++, b(10)-196++, b(10)

**Matched y ions:** y(2), y(3), y(4), y(5), y(5)++, y(6)-98, y(6), y(7)-98, y(7), y(7)++, y(8), y(8)-98, y(8)-196, y(8)-196++, y(9)-98, y(9), y(9)-98++, y(9)-196++, y(9)-196, y(9)++, y(10)-98, y(10), y(10)-196, y(10)++

**Precursor origin neutral loss:** +

## Peptide No.427

**IELSPSMEAPK**

**Confirmed sites:** @S:6

**Ambiguous sites:**

**MS/MS Fragmentation of IELSPSMEAPK**

Found in **TITIN\_MOUSE**, Titin OS=Mus musculus GN=Ttn PE=1 SV=1

Match to Query 1234: 1364.693554 from(683.354053,2+)

Title: Elution from: 36.364 to 36.364 scan no 2862 cid35.00 polarity:+:MA10





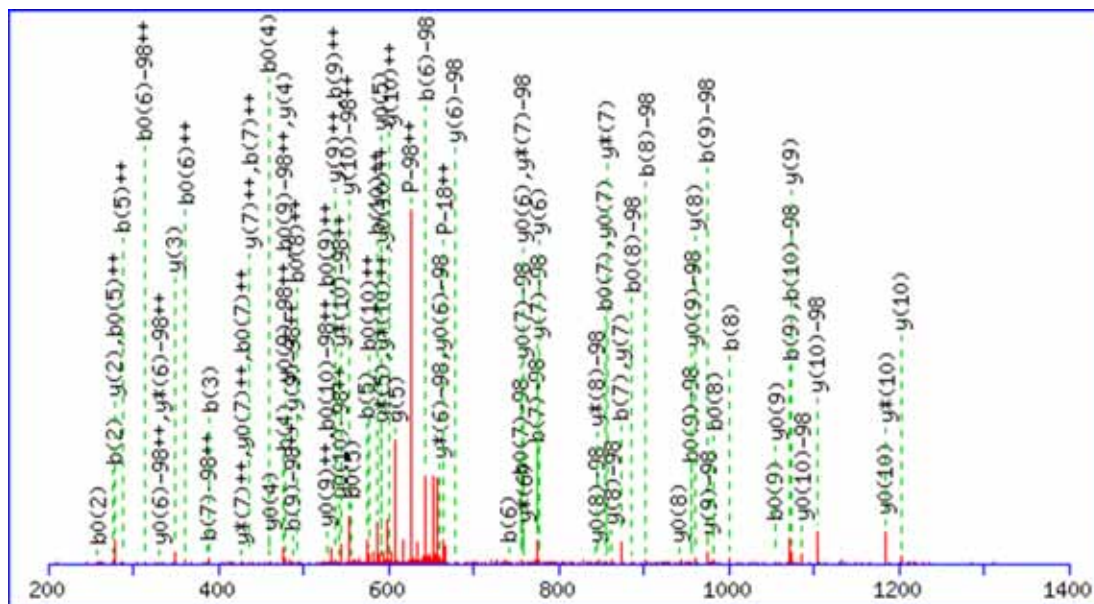

**Monoisotopic mass of neutral peptide Mr(calc):** 1348.6985

**Fixed modifications:** Carbamidomethyl (C) (apply to specified residues or termini only)

**Variable modifications:**

**N-term :** Dimethyl:2H(4)13C(2) (N-term)

**S6 :** Phospho (ST), with neutral losses 97.9769(shown in table), 0.0000

**K11 :** Dimethyl:2H(4)13C(2) (K)

**Ions Score:** 62 **Expect:** 3e-005

**Matched b ions:** b(2), b(3), b(4), b(5)++, b(5), b(6)-98, b(6), b(7), b(7)-98, b(7)-98++, b(7)++, b(8)-98, b(8), b(9)-98, b(9), b(9)-98++, b(9)++, b(10)-98, b(10)++

**Matched y ions:** y(2), y(3), y(4), y(5), y(6), y(6)-98, y(7)-98, y(7), y(7)++, y(8)-98, y(8), y(9)-98, y(9), y(9)-98++, y(9)++, y(10)-98, y(10), y(10)-98++, y(10)++

**Precursor origin neutral loss:** +

## Peptide No.429

**IESKISAPVIFDR**

**Confirmed sites:** @S:3,@S:5

**Ambiguous sites:**

MS/MS Fragmentation of **IESKISAPVIFDR**

Found in **SNX2\_MOUSE**, Sorting nexin-2 OS=Mus musculus GN=Snx2 PE=1 SV=2

Match to Query 3034: 1754.846856 from(439.718990,4+)

Title: Elution from: 23.401 to 23.401 scan no 1301 cid35.00 polarity:+:MA10

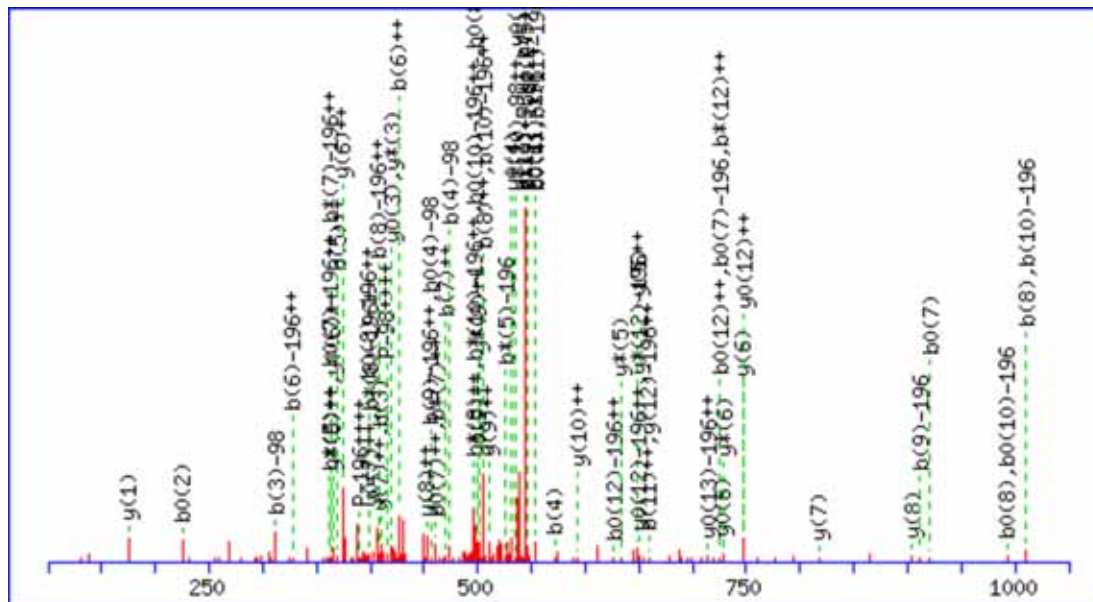

**Monoisotopic mass of neutral peptide Mr(calc):** 1754.8469

**Fixed modifications:** Carbamidomethyl (C) (apply to specified residues or termini only)

**Variable modifications:**

**S3 :** Phospho (ST), with neutral losses 97.9769(shown in table), 0.0000

**K4 :** Dimethyl:2H(4)13C(2) (K)

**S5 :** Phospho (ST), with neutral losses 97.9769(shown in table), 0.0000

**Ions Score:** 30 **Expect:** 0.051

**Matched b ions:** b(3)-98, b(3), b(4)-98, b(4), b(5)-196, b(5)++, b(6)++, b(6)-196++, b(6)-98++, b(7)-98++, b(7)++, b(8)++, b(8), b(8)-196++, b(8)-98++, b(9)-98++, b(9)-98, b(9)-196, b(9)++, b(9)-196++, b(10)-196++, b(10)-196, b(10)-98++, b(11)-98++, b(11)++

**Matched y ions:** y(1), y(5), y(6)++, y(6), y(7), y(7)++, y(8), y(8)++, y(9)++, y(10)-98++, y(10)++, y(12)-98++, y(12)-196++

**Precursor origin neutral loss:**

## Peptide No.430

**IGHHSTSDSSAYR**

**Confirmed sites:** @S:5

**Ambiguous sites:**

**MS/MS Fragmentation of IGHHSTSDSSAYR**

Found in **ODBA\_MOUSE**, 2-oxoisovalerate dehydrogenase subunit alpha, mitochondrial OS=Mus musculus GN=Bckdha PE=1 SV=1

Match to Query 3361: 1639.663590 from(547.561806,3+)

Title: Elution from: 20.427 to 20.427 scan no 1028 cid35.00 polarity:+:MA10

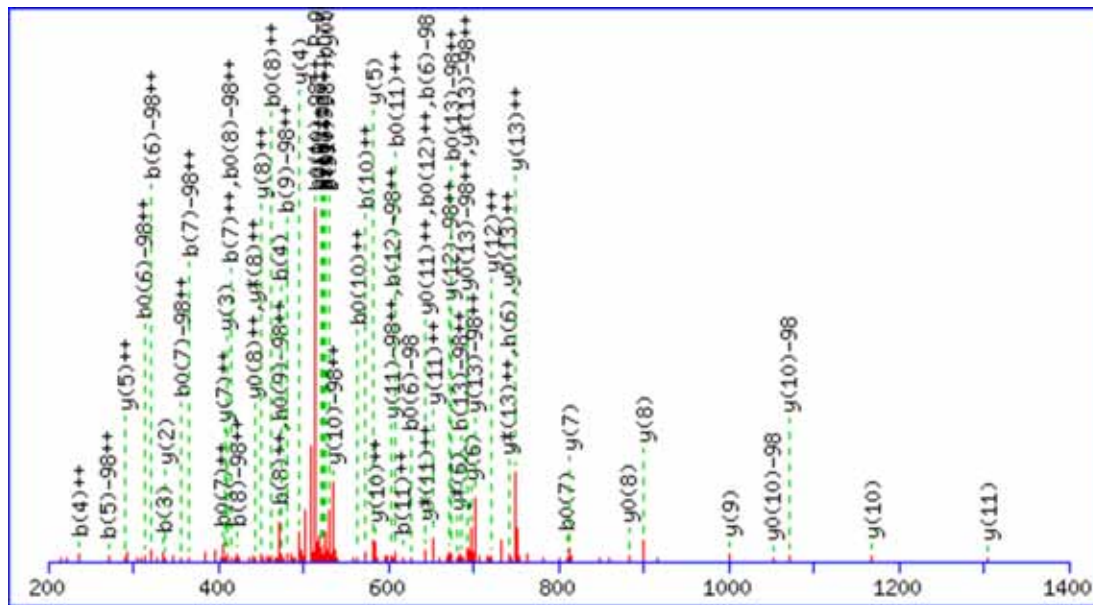

**Monoisotopic mass of neutral peptide Mr(calc):** 1639.6628

**Fixed modifications:** Carbamidomethyl (C) (apply to specified residues or termini only)

**Variable modifications:**

**N-term :** Dimethyl (N-term)

**S5 :** Phospho (ST), with neutral losses 0.0000(shown in table), 97.9769

**Ions Score:** 39 **Expect:** 0.0025

**Matched b ions:** b(3), b(4)++, b(4), b(5)-98++, b(6)-98++, b(6)-98, b(6), b(7)++, b(7)-98++, b(8)++, b(8)-98++, b(9)++, b(9)-98++, b(10)-98++, b(10)++, b(11)++, b(12)-98++, b(13)-98++

**Matched y ions:** y(2), y(3), y(4), y(5), y(5)++, y(6), y(7), y(7)++, y(8), y(8)++, y(9), y(10)-98++, y(10)-98, y(10), y(10)++, y(11), y(11)++, y(11)-98++, y(12)-98++, y(12)++, y(13)-98++, y(13)++

**Precursor origin neutral loss:** +

## Peptide No.431

**IGHHSTSDSSAYRSVDEVNYWDK**

**Confirmed sites:** @S:5,@S:10

**Ambiguous sites:**

MS/MS Fragmentation of **IGHHSTSDSSAYRSVDEVNYWDK**

Found in **ODBA\_MOUSE**, 2-oxoisovalerate dehydrogenase subunit alpha, mitochondrial OS=Mus musculus GN=Bckdha PE=1 SV=1

Match to Query 6907: 2983.207590 from(995.409806,3+)

Title: Elution from: 42.795 to 42.795 scan no 3731 cid35.00 polarity:+:MA10:m1s



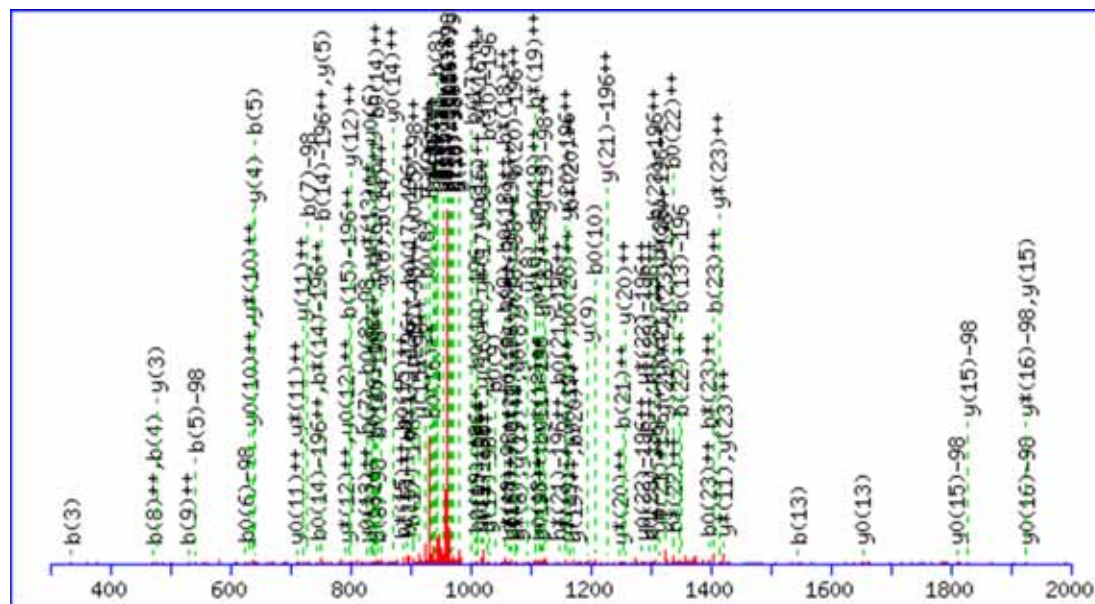

**Monoisotopic mass of neutral peptide Mr(calc):** 2983.2063

**Fixed modifications:** Carbamidomethyl (C) (apply to specified residues or termini only)

**Variable modifications:**

**N-term :** Dimethyl (N-term)

**S5 :** Phospho (ST), with neutral losses 0.0000(shown in table), 97.9769

**S10 :** Phospho (ST), with neutral losses 0.0000(shown in table), 97.9769

**K24 :** Dimethyl (K)

**Ions Score:** 32 **Expect:** 0.035

**Matched b ions:** b(3), b(4), b(5)-98, b(5), b(7)-98, b(7), b(8)++, b(8)-98, b(8), b(9), b(9)++, b(9)-98, b(10)-98, b(10)-196, b(11)-196, b(11)-98++, b(12)-98, b(13), b(13)-196, b(14)-196++, b(14)++, b(15)-196++, b(15)++, b(15)-98++, b(16)-98++, b(16)-196++, b(16)++, b(17)-196++, b(17)-98++, b(17)++, b(18)++, b(18)-196++, b(18)-98++, b(19)++, b(19)-98++, b(19)-196++, b(20)-98++, b(20)++, b(20)-196++, b(21)++, b(21)-98++, b(22)++, b(22)-98++, b(23)++, b(23)-196++, b(23)-98++

**Matched y ions:** y(3), y(4), y(5), y(6), y(7), y(8), y(9), y(11)++, y(12)++, y(13)++, y(15), y(15)-98++, y(15)++, y(15)-98, y(16)++, y(16)-98++, y(17)-98++, y(17)++, y(18)++, y(18)-98++, y(19)-98++, y(19)++, y(20)-196++, y(20)-98++, y(20)++, y(21)++, y(21)-98++, y(21)-196++, y(23)-196++, y(23)++, y(23)-98++

**Precursor origin neutral loss:** +

## Peptide No.432

**IGHHSTSDSSAYRSVDEVNYWDK**

**Confirmed sites:** @S:5,@S:15

**Ambiguous sites:**

MS/MS Fragmentation of **IGHHSTSDSSAYRSVDEVNYWDK**

Found in **ODBA\_MOUSE**, 2-oxoisovalerate dehydrogenase subunit alpha, mitochondrial OS=Mus musculus GN=Bckdha PE=1 SV=1

Match to Query 6655: 2983.208151 from(995.409993,3+)

Title: Elution from: 42.824 to 42.824 scan no 3766 cid35.00 polarity:+:MA10:m1s

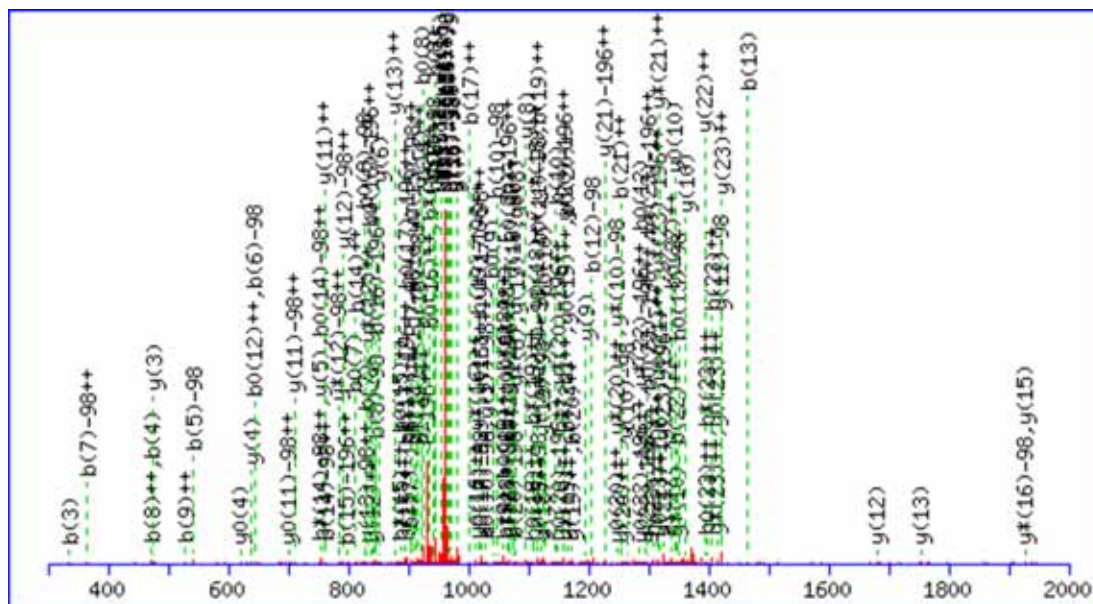

**Monoisotopic mass of neutral peptide Mr(calc):** 2983.2063

**Fixed modifications:** Carbamidomethyl (C) (apply to specified residues or termini only)

**Variable modifications:**

**N-term :** Dimethyl (N-term)

**S5 :** Phospho (ST), with neutral losses 0.0000(shown in table), 97.9769

**S15 :** Phospho (ST), with neutral losses 0.0000(shown in table), 97.9769

**K24 :** Dimethyl (K)

**Ions Score:** 37 **Expect:** 0.011

**Matched b ions:** b(3), b(4), b(5)-98, b(6)-98, b(7)-98++, b(7), b(8)++, b(8)-98, b(8), b(9), b(9)++, b(9)-98, b(10)-98, b(10), b(12)-98, b(13), b(14)++, b(14)-98++, b(15)++, b(15)-196++, b(15)-98++, b(16)-98++, b(16)-196++, b(16)++, b(17)-98, b(17)-196++, b(17)-98++, b(17)++, b(18)++, b(18)-196++, b(18)-98++, b(19)++, b(19)-98++, b(19)-196++, b(20)-98++, b(20)++, b(20)-196++, b(21)-98++, b(21)++, b(22)-98++, b(22)++, b(23)-196++, b(23)++, b(23)-98++

**Matched y ions:** y(3), y(4), y(5), y(6), y(7), y(8), y(9), y(10)-98, y(10), y(11)++, y(11)-98++, y(11)-98, y(12), y(12)-98++, y(12)++, y(13), y(13)-98++, y(13)++, y(14)++, y(15), y(15)++, y(15)-98++, y(16)-98++, y(16)++, y(17)-98++, y(17)++, y(18)++, y(18)-98++, y(19)-98++, y(19)++, y(20)-98++, y(20)-196++, y(20)++, y(21)++, y(21)-196++, y(21)-98++, y(22)-196++, y(22)-98++, y(22)++, y(23)-196++, y(23)-98++, y(23)++

**Precursor origin neutral loss:** +

## Peptide No.433

**IGHHSTSDSSAYRSVDEVNYWDK**

**Confirmed sites:** @S:5,@Y:13

**Ambiguous sites:**

MS/MS Fragmentation of **IGHHSTSDSSAYRSVDEVNYWDK**

Found in **ODBA\_MOUSE**, 2-oxoisovalerate dehydrogenase subunit alpha, mitochondrial OS=Mus musculus GN=Bckdha PE=1 SV=1

Match to Query 7364: 2983.208508 from(746.809403,4+)





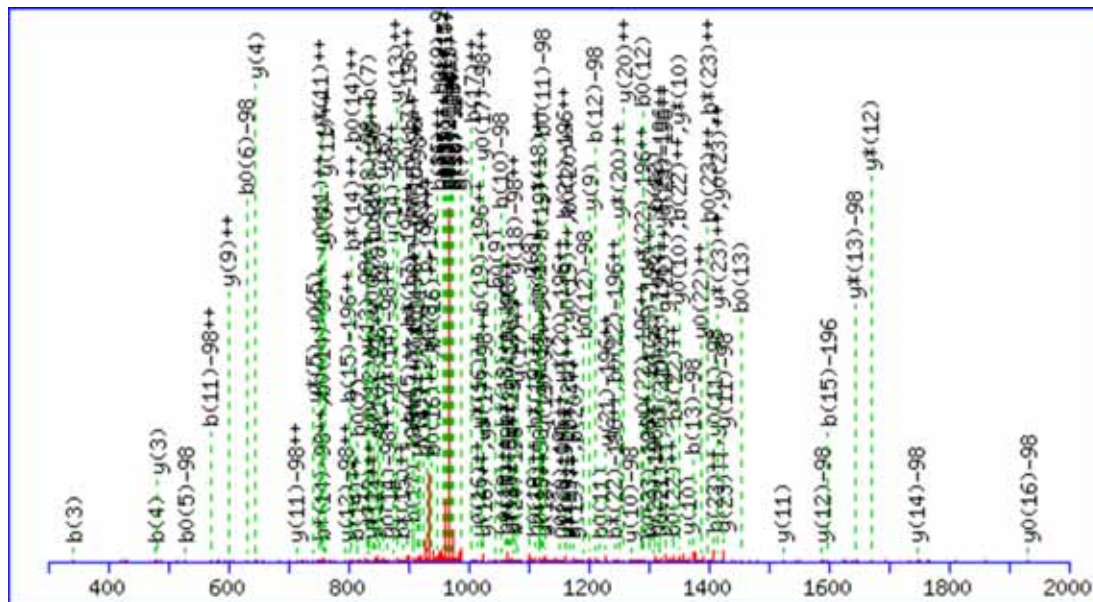

**Monoisotopic mass of neutral peptide Mr(calc):** 2995.2699

**Fixed modifications:** Carbamidomethyl (C) (apply to specified residues or termini only)

**Variable modifications:**

**N-term :** Dimethyl:2H(4)13C(2) (N-term)

**S5 :** Phospho (ST), with neutral losses 97.9769(shown in table), 0.0000

**S15 :** Phospho (ST), with neutral losses 97.9769(shown in table), 0.0000

**K24 :** Dimethyl:2H(4)13C(2) (K)

**Ions Score:** 40 **Expect:** 0.0071

**Matched b ions:** b(3), b(4), b(7), b(8)-98, b(8), b(9)-98, b(9), b(10)-98, b(11)-98++, b(12)-98, b(12), b(13)-98, b(14)++, b(15)-98++, b(15)-196, b(15)++, b(15)-196++, b(16)-196++, b(16)-98++, b(16)++, b(17)-98++, b(17)-196++, b(17)++, b(18)++, b(18)-196++, b(18)-98++, b(19)-98++, b(19)++, b(19)-196++, b(20)-98++, b(20)++, b(20)-196++, b(21)-196++, b(22)++, b(22)-98++, b(23)++, b(23)-196++, b(23)-98++

**Matched y ions:** y(3), y(4), y(5), y(6), y(7), y(8), y(9)++, y(9), y(10)-98, y(10), y(11)-98++, y(11), y(11)++, y(11)-98, y(12)-98++, y(12)-98, y(12)++, y(13)-98++, y(13)++, y(14)-98, y(14)-98++, y(14)++, y(15)++, y(15)-98++, y(16)-98++, y(16)++, y(17)++, y(18)++, y(18)-98++, y(19)-98++, y(19)++, y(20)-196++, y(20)-98++, y(20)++, y(21)-196++, y(21)++, y(21)-98++, y(23)-196++, y(23)++, y(23)-98++

**Precursor origin neutral loss:** +

## Peptide No.435

**IGHHSTDDSSAYRSVDEVNYWDK**

**Confirmed sites:** @S:5,@Y:13

**Ambiguous sites:**

MS/MS Fragmentation of **IGHHSTDDSSAYRSVDEVNYWDK**

Found in **ODBA\_MOUSE**, 2-oxoisovalerate dehydrogenase subunit alpha, mitochondrial OS=Mus musculus GN=Bckdha PE=1 SV=1

Match to Query 6921: 2995.271828 from(749.825233,4+)

Title: Elution from: 42.761 to 42.761 scan no 3726 cid35.00 polarity:+:MA10:m1s



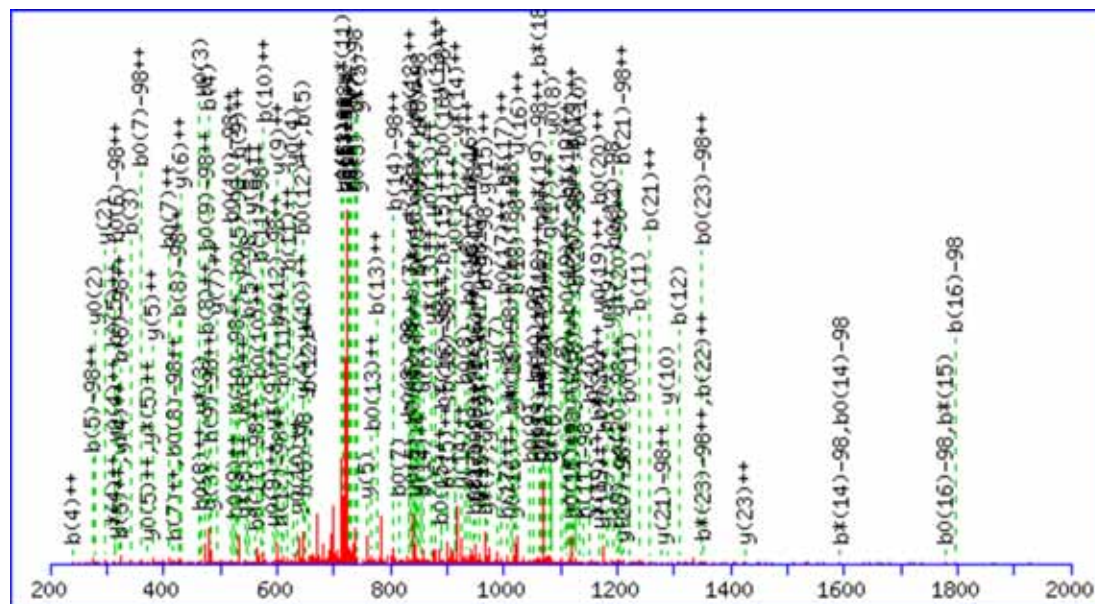

**Monoisotopic mass of neutral peptide Mr(calc):** 2995.2699

**Fixed modifications:** Carbamidomethyl (C) (apply to specified residues or termini only)

**Variable modifications:**

**N-term :** Dimethyl:2H(4)13C(2) (N-term)

**S5 :** Phospho (ST), with neutral losses 97.9769(shown in table), 0.0000

**Y13 :** Phospho (Y)

**K24 :** Dimethyl:2H(4)13C(2) (K)

**Ions Score:** 50 **Expect:** 0.00078

**Matched b ions:** b(3), b(4)++, b(4), b(5)-98++, b(5)++, b(5)-98, b(5), b(6)-98++, b(6)-98, b(7)++, b(7)-98, b(7), b(8)-98++, b(8)++, b(8)-98, b(8), b(9)-98, b(9)++, b(9)-98++, b(9), b(10)++, b(10)-98++, b(10)-98, b(10), b(11), b(11)++, b(11)-98++, b(11)-98, b(12)-98++, b(12)++, b(12), b(13)-98++, b(13)++, b(14)-98++, b(14)++, b(15)++, b(15)-98++, b(16)-98, b(16)-98++, b(16)++, b(17)-98++, b(17)++, b(18)++, b(18)-98++, b(19)-98++, b(19)++, b(20)++, b(20)-98++, b(21)++, b(21)-98++, b(22)++

**Matched y ions:** y(2), y(3), y(4)++, y(4), y(5)++, y(5), y(6)++, y(6), y(7), y(7)++, y(8), y(8)++, y(9)++, y(9), y(10), y(10)++, y(11)++, y(12)++, y(13)++, y(14)++, y(15)++, y(16)++, y(17)++, y(18)++, y(19)++, y(20)-98++, y(21)-98++, y(23)++

**Precursor origin neutral loss:** +

## Peptide No.436

**IGHHSTDDSSAYRSVDEVNYWDK**

**Confirmed sites:** @T:6,@Y:13

**Ambiguous sites:**

**MS/MS Fragmentation of** **IGHHSTDDSSAYRSVDEVNYWDK**

Found in **ODBA\_MOUSE**, 2-oxoisovalerate dehydrogenase subunit alpha, mitochondrial OS=Mus musculus GN=Bckdha PE=1 SV=1

Match to Query 6667: 2995.271564 from(749.825167,4+)

Title: Elution from: 42.740 to 42.740 scan no 3755 cid35.00 polarity+:MA10:m1s

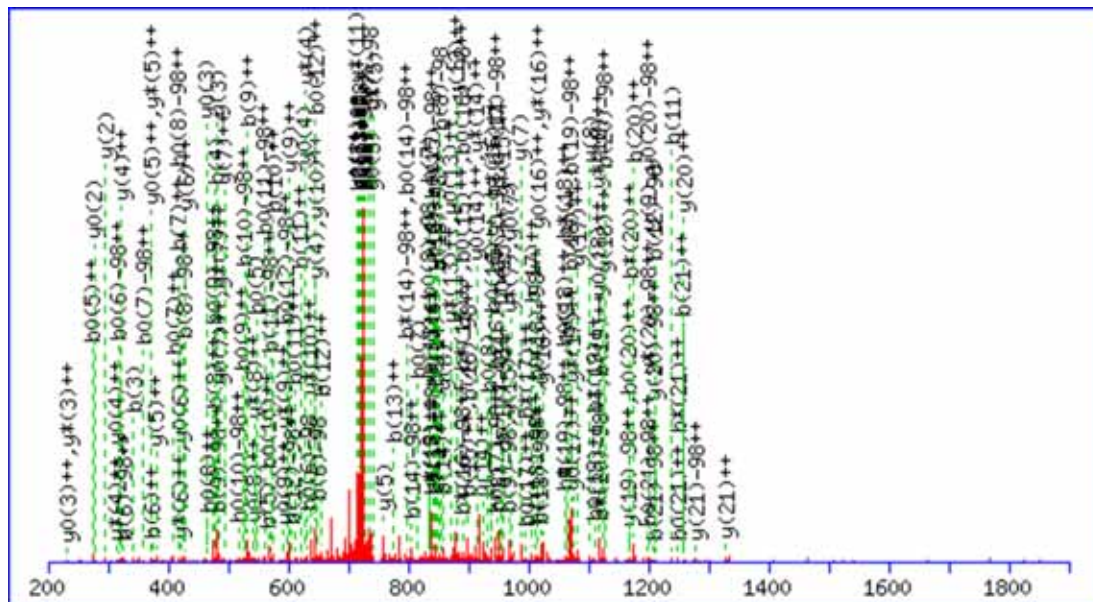

**Monoisotopic mass of neutral peptide Mr(calc):** 2995.2699

**Fixed modifications:** Carbamidomethyl (C) (apply to specified residues or termini only)

**Variable modifications:**

**N-term :** Dimethyl:2H(4)13C(2) (N-term)

**T6 :** Phospho (ST), with neutral losses 97.9769(shown in table), 0.0000

**Y13 :** Phospho (Y)

**K24 :** Dimethyl:2H(4)13C(2) (K)

**Ions Score:** 59 **Expect:** 0.0001

**Matched b ions:** b(3), b(4), b(5), b(6)-98++, b(6)++, b(6)-98, b(7)-98, b(7)++, b(7), b(8)-98++, b(8)++, b(8)-98, b(8), b(9)++, b(9)-98, b(9)-98++, b(9), b(10)++, b(10)-98++, b(11)-98++, b(11)++, b(11), b(12)-98++, b(12)++, b(12)-98, b(13)-98++, b(13)++, b(14)-98++, b(14)++, b(15)++, b(15)-98++, b(16)-98++, b(16)++, b(17)-98++, b(17)++, b(18)++, b(18)-98++, b(19)-98++, b(19)++, b(20)++, b(20)-98++, b(21)++, b(21)-98++

**Matched y ions:** y(2), y(3), y(4)++, y(4), y(5)++, y(5), y(6)++, y(6), y(7), y(7)++, y(8), y(9)++, y(9), y(10)++, y(11)++, y(12)++, y(13)++, y(14)++, y(15)++, y(16)++, y(17)++, y(18)++, y(19)-98++, y(20)++, y(20)-98++, y(21)++, y(21)-98++

**Precursor origin neutral loss:** +

## Peptide No.437

**IGIFSENEEVTD**

**Confirmed sites:** @T:11

**Ambiguous sites:**

**MS/MS Fragmentation of IGIFSENEEVTD**

Found in **AT2A1\_MOUSE**, Sarcoplasmic/endoplasmic reticulum calcium ATPase 1 OS=Mus musculus GN=Atp2a1 PE=2 SV=1

Match to Query 3197: 1615.715840 from(808.865196,2+)

Title: Elution from: 49.509 to 49.509 scan no 4857 cid35.00 polarity:+:MA10:m1s

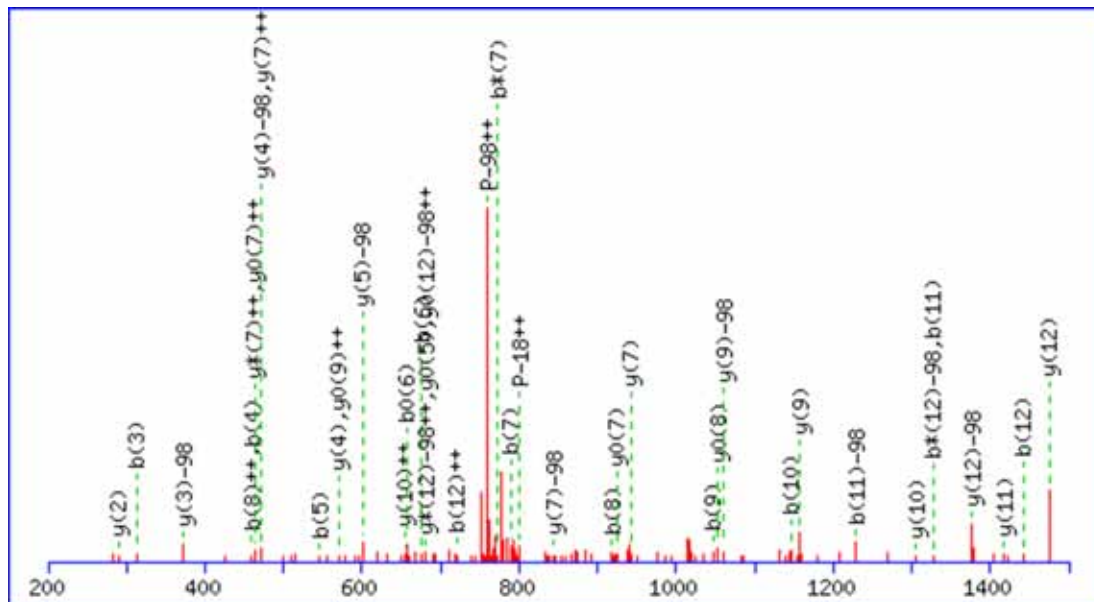

**Monoisotopic mass of neutral peptide Mr(calc):** 1615.7131

**Fixed modifications:** Carbamidomethyl (C) (apply to specified residues or termini only)

**Variable modifications:**

**N-term :** Dimethyl (N-term)

**T11 :** Phospho (ST), with neutral losses 0.0000(shown in table), 97.9769

**Ions Score:** 40 **Expect:** 0.0039

**Matched b ions:** b(3), b(4), b(5), b(6), b(7), b(8)++, b(8), b(9), b(10), b(11)-98, b(11), b(12), b(12)++

**Matched y ions:** y(2), y(3)-98, y(4)-98, y(4), y(5)-98, y(7)++, y(7)-98, y(7), y(9), y(9)-98, y(10), y(10)++, y(11), y(12)-98, y(12)

**Precursor origin neutral loss:** +

## Peptide No.438

**IHNLSESDCGEYVCEVSGEGGTSK**

**Confirmed sites:** @S:7

**Ambiguous sites:**

MS/MS Fragmentation of **IHNLSESDCGEYVCEVSGEGGTSK**

Found in **TITIN\_MOUSE**, Titin OS=Mus musculus GN=Ttn PE=1 SV=1

Match to Query 8226: 2749.125546 from(917.382458,3+)

Title: Elution from: 42.999 to 42.999 scan no 4058 cid35.00 polarity:+:MA10:m1s





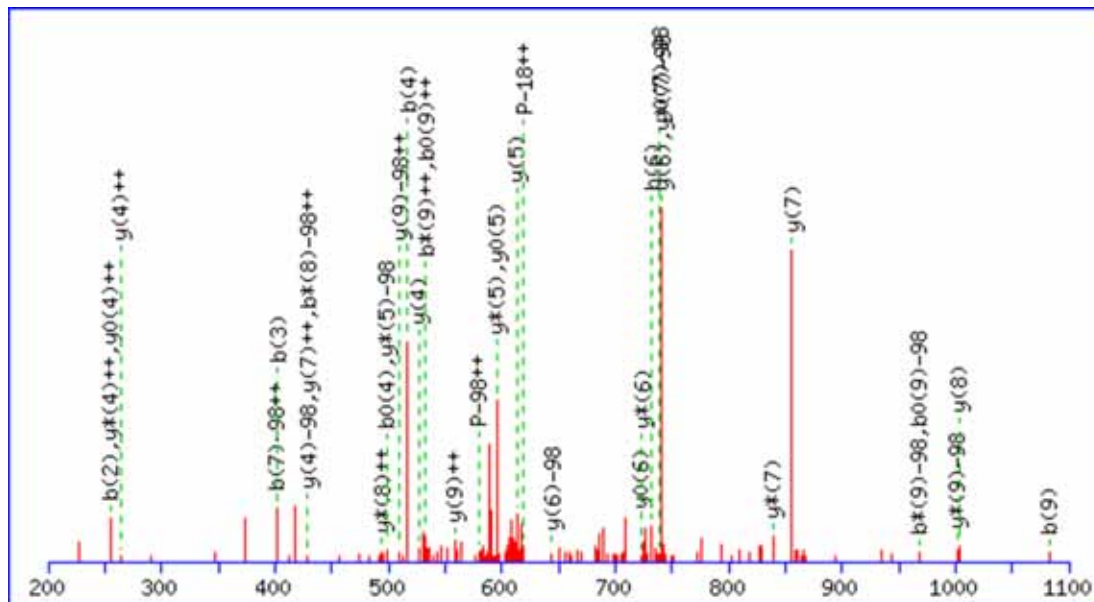

**Monoisotopic mass of neutral peptide Mr(calc):** 1256.6417

**Fixed modifications:** Carbamidomethyl (C) (apply to specified residues or termini only)

**Variable modifications:**

**N-term :** Dimethyl (N-term)

**S7 :** Phospho (ST), with neutral losses 0.0000(shown in table), 97.9769

**K10 :** Dimethyl (K)

**Ions Score:** 29 **Expect:** 0.045

**Matched b ions:** b(2), b(3), b(4), b(6), b(7)-98++, b(9)

**Matched y ions:** y(4), y(4)++, y(4)-98, y(5), y(6), y(6)-98, y(7), y(7)++, y(8), y(9)-98++, y(9)++

**Precursor origin neutral loss:**

## Peptide No.440

**ILLSHDSPTR**

**Confirmed sites:** @S:7

**Ambiguous sites:**

**MS/MS Fragmentation of ILLSHDSPTR**

Found in **ABRA\_MOUSE**, Actin-binding Rho-activating protein OS=Mus musculus GN=Abra PE=1 SV=1

Match to Query 1084: 1245.613036 from(623.813794,2+)

Title: Elution from: 27.406 to 27.406 scan no 1804 cid35.00 polarity:+:MA10

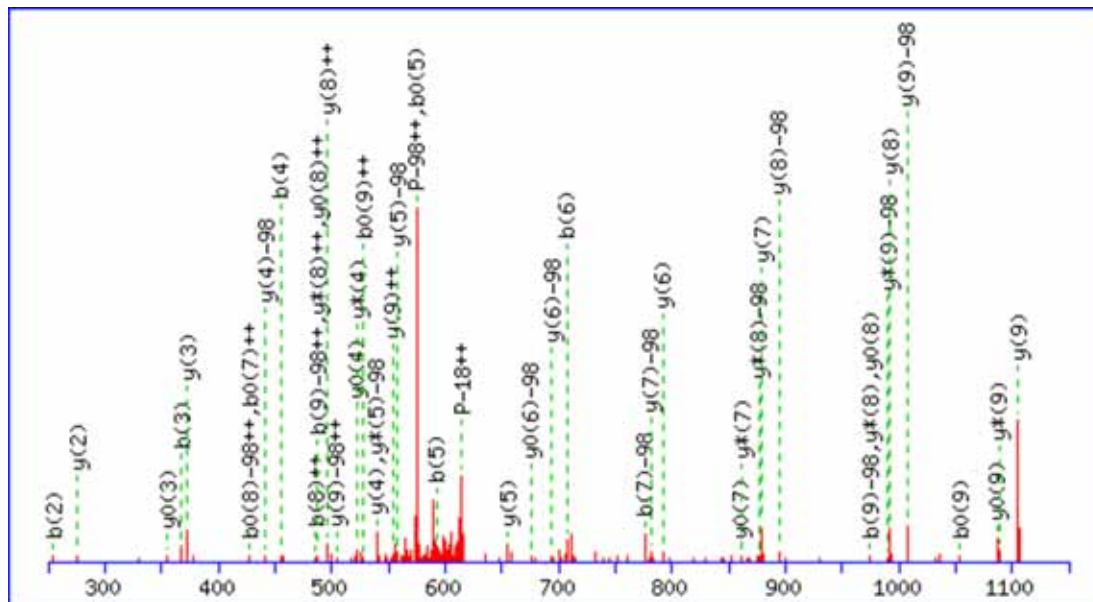

**Monoisotopic mass of neutral peptide Mr(calc):** 1245.6118

**Fixed modifications:** Carbamidomethyl (C) (apply to specified residues or termini only)

**Variable modifications:**

**N-term :** Dimethyl (N-term)

**S7 :** Phospho (ST), with neutral losses 0.0000(shown in table), 97.9769

**Ions Score:** 55 **Expect:** 9.3e-005

**Matched b ions:** b(2), b(3), b(4), b(5), b(6), b(7)-98, b(8)++, b(9)-98, b(9)-98++

**Matched y ions:** y(2), y(3), y(4), y(4)-98, y(5), y(5)-98, y(6), y(6)-98, y(7), y(7)-98, y(8)++, y(8)-98, y(8), y(9)-98, y(9), y(9)++, y(9)-98++

**Precursor origin neutral loss:** +

## Peptide No.441

**INFDSNSAYR**

**Confirmed sites:** @S:5

**Ambiguous sites:**

**MS/MS Fragmentation of INFDSNSAYR**

Found in **SUCB1\_MOUSE**, Succinyl-CoA ligase [ADP-forming] subunit beta, mitochondrial OS=Mus musculus GN=Sucla2 PE=1 SV=2

Match to Query 1249: 1293.540118 from(647.777335,2+)

Title: Elution from: 40.422 to 40.422 scan no 3467 cid35.00 polarity:+:MA10



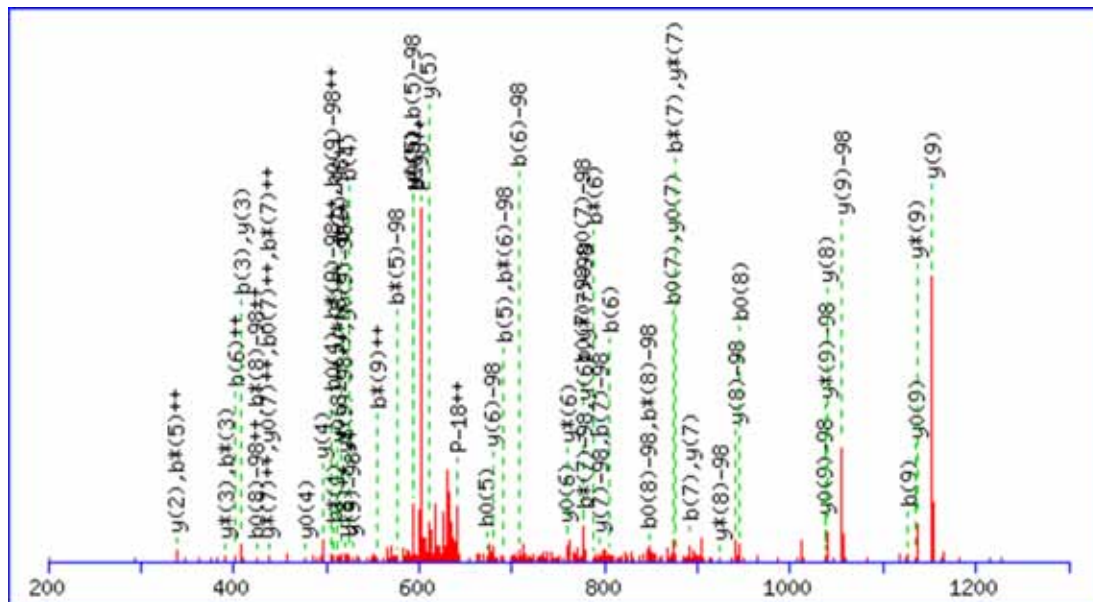

**Monoisotopic mass of neutral peptide Mr(calc):** 1299.5709

**Fixed modifications:** Carbamidomethyl (C) (apply to specified residues or termini only)

**Variable modifications:**

**N-term :** Dimethyl:2H(4)13C(2) (N-term)

**S5 :** Phospho (ST), with neutral losses 0.0000(shown in table), 97.9769

**Ions Score:** 36 **Expect:** 0.0052

**Matched b ions:** b(3), b(4), b(5)-98, b(5), b(6)++, b(6)-98, b(6), b(7), b(7)-98, b(9), b(9)-98++

**Matched y ions:** y(2), y(3), y(4), y(5), y(6), y(6)-98, y(7), y(7)-98, y(8)-98, y(8), y(8)++, y(9)-98, y(9), y(9)-98++

**Precursor origin neutral loss:** +

## Peptide No.443

**INFDSNSAYR**

**Confirmed sites:** @S:7

**Ambiguous sites:**

MS/MS Fragmentation of **INFDSNSAYR**

Found in **SUCB1\_MOUSE**, Succinyl-CoA ligase [ADP-forming] subunit beta, mitochondrial OS=Mus musculus GN=Sucla2 PE=1 SV=2

Match to Query 1266: 1299.571728 from(650.793140,2+)

Title: Elution from: 40.429 to 40.429 scan no 3468 cid35.00 polarity:+:MA10



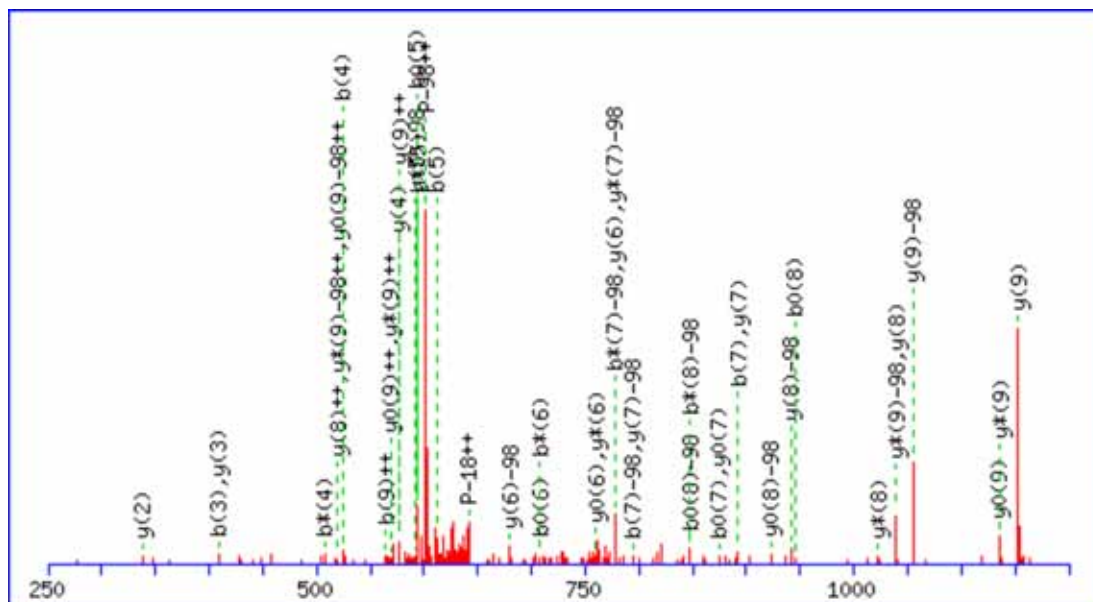

**Monoisotopic mass of neutral peptide Mr(calc):** 1299.5709

**Fixed modifications:** Carbamidomethyl (C) (apply to specified residues or termini only)

**Variable modifications:**

**N-term :** Dimethyl:2H(4)13C(2) (N-term)

**S7 :** Phospho (ST), with neutral losses 0.0000(shown in table), 97.9769

**Ions Score:** 30 **Expect:** 0.019

**Matched b ions:** b(3), b(4), b(5), b(7), b(7)-98, b(9)++

**Matched y ions:** y(2), y(3), y(4), y(5)-98, y(6), y(6)-98, y(7), y(7)-98, y(8)-98, y(8), y(8)++, y(9)-98, y(9), y(9)++

**Precursor origin neutral loss:** +

## Peptide No.444

**IQQFDDGGSD EEDIWEEK**

**Confirmed sites:** @S:9

**Ambiguous sites:**

**MS/MS Fragmentation of IQQFDDGGSD EEDIWEEK**

Found in **PP6R3\_MOUSE**, Serine/threonine-protein phosphatase 6 regulatory subunit 3 OS=Mus musculus GN=Ppp6r3 PE=1 SV=1

Match to Query 6967: 2274.920706 from(1138.467629,2+)

Title: Elution from: 55.062 to 55.062 scan no 5464 cid35.00 polarity:+:MA10:m1s

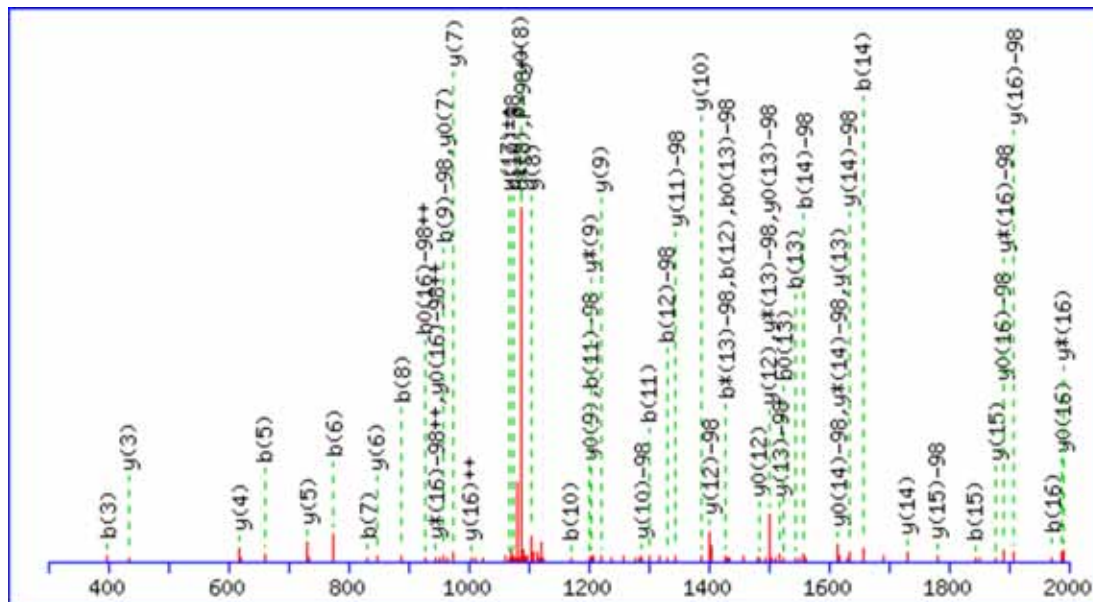

**Monoisotopic mass of neutral peptide Mr(calc):** 2274.9205

**Fixed modifications:** Carbamidomethyl (C) (apply to specified residues or termini only)

**Variable modifications:**

**N-term :** Dimethyl (N-term)

**S9 :** Phospho (ST), with neutral losses 97.9769(shown in table), 0.0000

**K18 :** Dimethyl (K)

**Ions Score:** 85 **Expect:** 1.1e-007

**Matched b ions:** b(3), b(5), b(6), b(7), b(8), b(9)-98, b(10)-98, b(10), b(11)-98, b(11), b(12), b(12)-98, b(13), b(14), b(14)-98, b(15), b(16)

**Matched y ions:** y(3), y(4), y(5), y(6), y(7), y(8), y(9), y(10), y(10)-98, y(11)-98, y(12)-98, y(12), y(13), y(13)-98, y(14), y(14)-98, y(15)-98, y(15), y(16)-98, y(16)++, y(17)++

**Precursor origin neutral loss:** +

## Peptide No.445

**IQSQTVGQGSDAHFR**

**Confirmed sites:** @S:10

**Ambiguous sites:**

MS/MS Fragmentation of **IQSQTVGQGSDAHFR**

Found in **TITIN\_MOUSE**, Titin OS=Mus musculus GN=Ttn PE=1 SV=1

Match to Query 3389: 1737.784032 from(580.268620,3+)

Title: Elution from: 28.249 to 28.249 scan no 1913 cid35.00 polarity:+:MA10

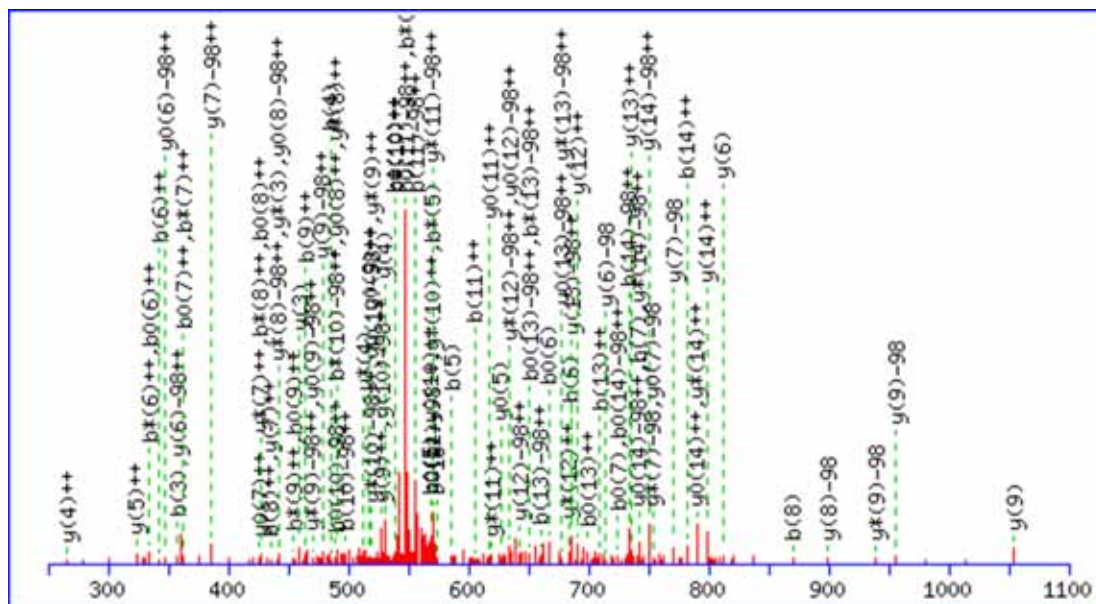

**Monoisotopic mass of neutral peptide Mr(calc):** 1737.7836

**Fixed modifications:** Carbamidomethyl (C) (apply to specified residues or termini only)

**Variable modifications:**

**N-term :** Dimethyl (N-term)

**S10 :** Phospho (ST), with neutral losses 97.9769(shown in table), 0.0000

**Ions Score:** 32 **Expect:** 0.028

**Matched b ions:** b(3), b(4), b(5), b(6), b(6)++, b(7), b(8), b(8)++, b(9)++, b(10)++, b(10)-98++, b(11)-98++, b(11)++, b(13)-98++, b(13)++, b(14)-98++, b(14)++

**Matched y ions:** y(3), y(4), y(4)++, y(5)++, y(6)-98++, y(6), y(6)-98, y(7)-98++, y(7)-98, y(7)++, y(8)-98, y(9)-98, y(9), y(9)++, y(9)-98++, y(10)-98++, y(12)++, y(12)-98++, y(13)-98++, y(13)++, y(14)-98++, y(14)++

**Precursor origin neutral loss:** +

## Peptide No.446

**ISSNPYSTVTMDEL**R

**Confirmed sites:** @S:2

**Ambiguous sites:**

MS/MS Fragmentation of **ISSNPYSTVTMDEL**R

Found in **ACTN2\_MOUSE**, Alpha-actinin-2 OS=Mus musculus GN=Actn2 PE=1 SV=1

Match to Query 5229: 1922.833696 from(962.424124,2+)

Title: Elution from: 47.162 to 47.162 scan no 4566 cid35.00 polarity:+MA10







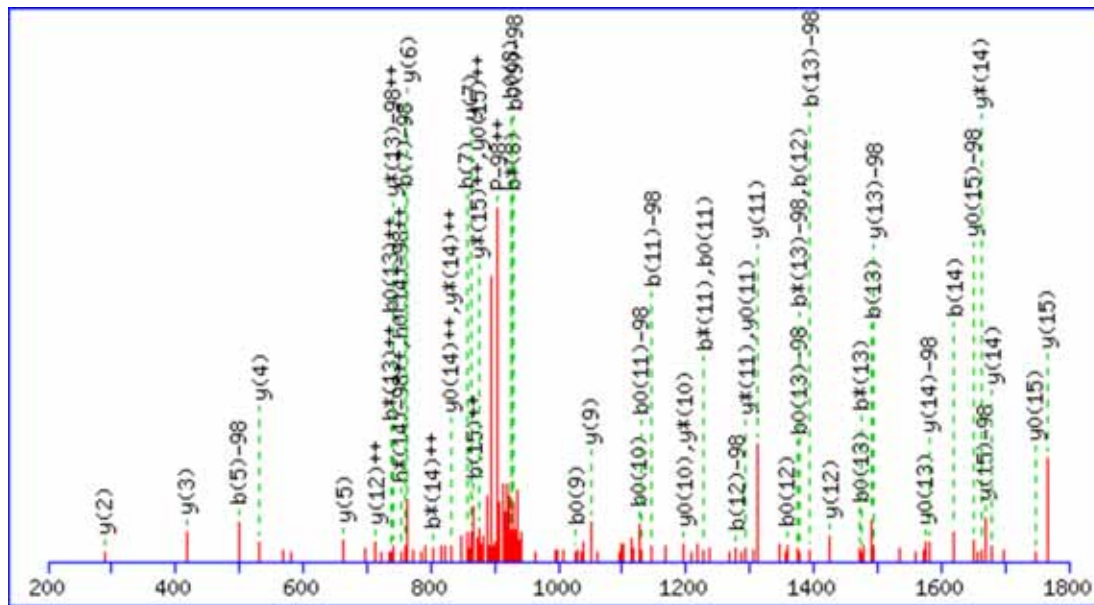

**Monoisotopic mass of neutral peptide Mr(calc):** 1906.8383

**Fixed modifications:** Carbamidomethyl (C) (apply to specified residues or termini only)

**Variable modifications:**

**N-term :** Dimethyl (N-term)

**S4 :** Phospho (ST), with neutral losses 97.9769(shown in table), 0.0000

**Ions Score:** 69 **Expect:** 5.4e-006

**Matched b ions:** b(5)-98, b(7)-98, b(7), b(11)-98, b(12)-98, b(12), b(13), b(13)-98, b(14), b(15)++

**Matched y ions:** y(2), y(3), y(4), y(5), y(6), y(7), y(9), y(11), y(12), y(12)++, y(13)-98, y(14)-98, y(14), y(15)-98, y(15)

**Precursor origin neutral loss:** +

## Peptide No.449

**ISSSNPYSTVTMDEL R**

**Confirmed sites:** @S:3

**Ambiguous sites:**

**MS/MS Fragmentation of ISSSNPYSTVTMDEL R**

Found in **ACTN2\_MOUSE**, Alpha-actinin-2 OS=Mus musculus GN=Actn2 PE=1 SV=1

Match to Query 4215: 1928.866576 from(965.440564,2+)

Title: Elution from: 46.977 to 46.977 scan no 4224 cid35.00 polarity:+:MA10:m1s

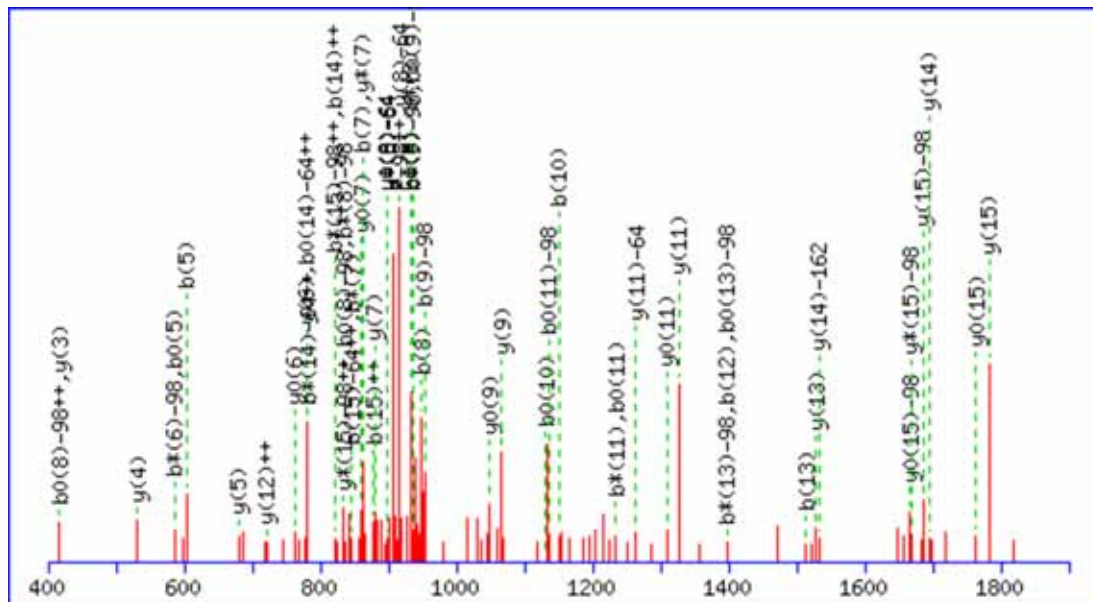

**Monoisotopic mass of neutral peptide Mr(calc):** 1928.8651

**Fixed modifications:** Carbamidomethyl (C) (apply to specified residues or termini only)

**Variable modifications:**

**N-term :** Dimethyl:2H(4)13C(2) (N-term)

**S3 :** Phospho (ST), with neutral losses 0.0000(shown in table), 97.9769

**M12 :** Oxidation (M), with neutral losses 0.0000(shown in table), 63.9983

**Ions Score:** 41 **Expect:** 0.004

**Matched b ions:** b(5), b(7), b(8), b(9)-98, b(10), b(12), b(13), b(14)++, b(15)++

**Matched y ions:** y(3), y(4), y(5), y(6), y(7), y(9), y(11), y(12)++, y(13), y(14), y(15)-98, y(15)

**Precursor origin neutral loss:** +

## Peptide No.450

**ISSSNPYSTVTMDELRL**

**Confirmed sites:** @S:4

**Ambiguous sites:**

**MS/MS Fragmentation of ISSSNPYSTVTMDELRL**

Found in **ACTN2\_MOUSE**, Alpha-actinin-2 OS=Mus musculus GN=Actn2 PE=1 SV=1

Match to Query 4082: 1928.867784 from(965.441168,2+)

Title: Elution from: 47.476 to 47.476 scan no 4294 cid35.00 polarity:+:MA10

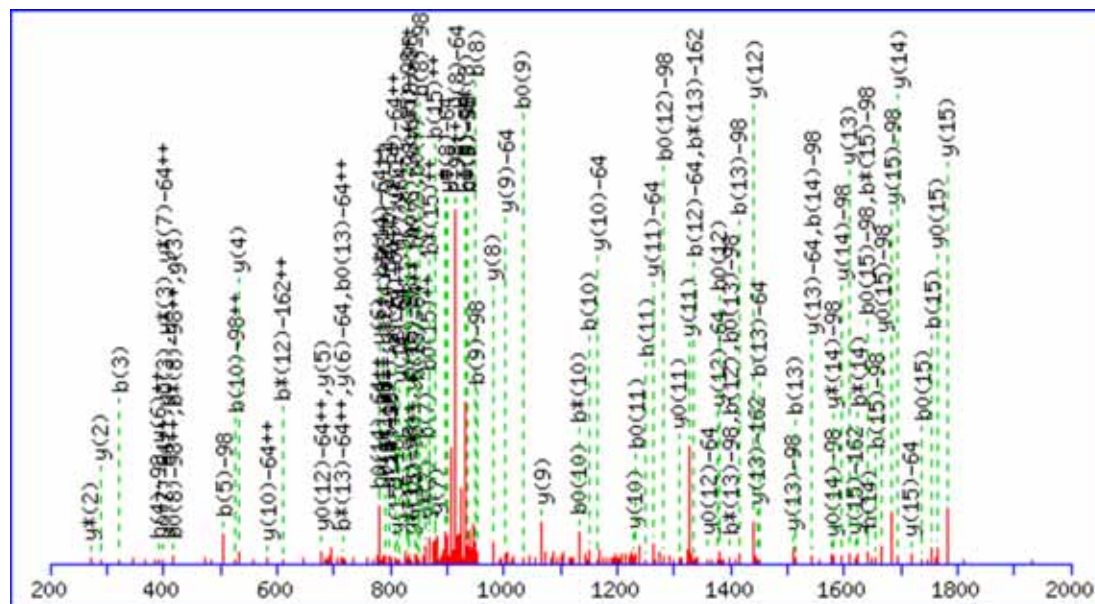

**Monoisotopic mass of neutral peptide Mr(calc):** 1928.8651

**Fixed modifications:** Carbamidomethyl (C) (apply to specified residues or termini only)

**Variable modifications:**

**N-term :** Dimethyl:2H(4)13C(2) (N-term)

**S4 :** Phospho (ST), with neutral losses 97.9769(shown in table), 0.0000

**M12 :** Oxidation (M), with neutral losses 0.0000(shown in table), 63.9983

**Ions Score:** 63 **Expect:** 2.6e-005

**Matched b ions:** b(3), b(4)-98, b(5)-98, b(7), b(8)-98, b(8), b(9)-98, b(10), b(10)-98++, b(11), b(12), b(13)-98, b(13), b(14)-98, b(14), b(15), b(15)-98++, b(15)++, b(15)-98

**Matched y ions:** y(2), y(3), y(4), y(5), y(6), y(6)++, y(7), y(8), y(9), y(10), y(11), y(12), y(13)-98, y(13), y(14), y(14)-98, y(14)-98++, y(15)-98, y(15), y(15)-98++

**Precursor origin neutral loss:** +

## Peptide No.451

**ISSSNPYSTVTMDEL R**

**Confirmed sites:** @S:4

**Ambiguous sites:**

**MS/MS Fragmentation of ISSSNPYSTVTMDEL R**

Found in **ACTN2\_MOUSE**, Alpha-actinin-2 OS=Mus musculus GN=Actn2 PE=1 SV=1

Match to Query 3972: 1912.872506 from(957.443529,2+)

Title: Elution from: 52.531 to 52.531 scan no 4882 cid35.00 polarity:+:MA10:m1s



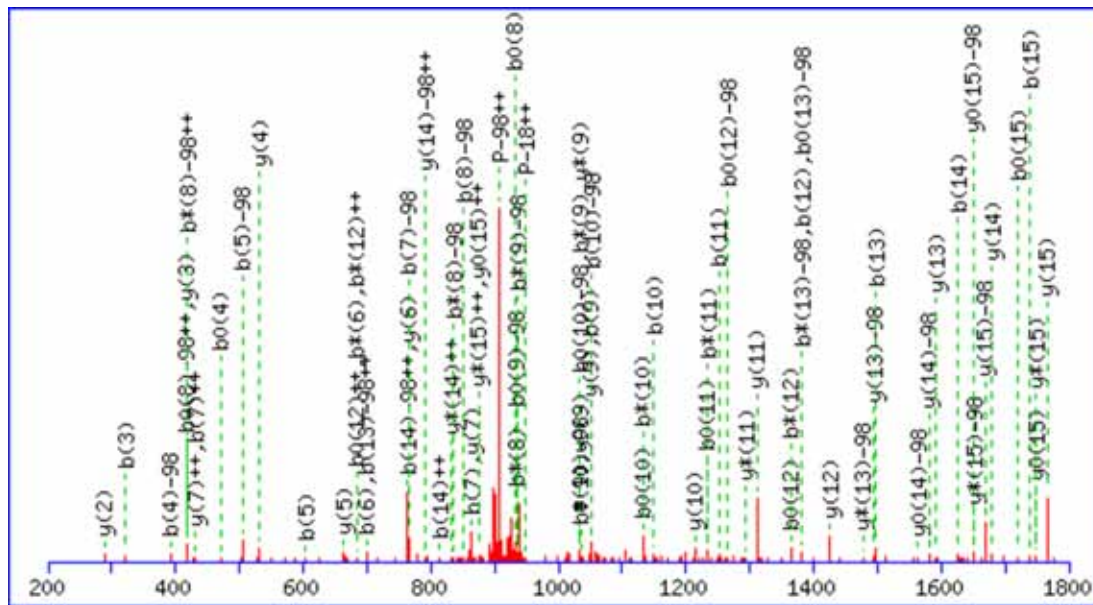

**Monoisotopic mass of neutral peptide Mr(calc):** 1912.8701

**Fixed modifications:** Carbamidomethyl (C) (apply to specified residues or termini only)

**Variable modifications:**

**N-term :** Dimethyl:2H(4)13C(2) (N-term)

**S4 :** Phospho (ST), with neutral losses 97.9769(shown in table), 0.0000

**Ions Score:** 83 **Expect:** 2.7e-007

**Matched b ions:** b(3), b(4)-98, b(5)-98, b(5), b(6), b(7), b(7)-98, b(7)++, b(8)-98, b(9), b(10)-98, b(10), b(11), b(12), b(13), b(13)-98++, b(14)-98++, b(14), b(14)++, b(15)

**Matched y ions:** y(2), y(3), y(4), y(5), y(6), y(7), y(7)++, y(9), y(10), y(11), y(12), y(13)-98, y(13), y(14)-98, y(14), y(14)-98++, y(15)-98, y(15)

**Precursor origin neutral loss:** +

## Peptide No.452

**ITSKGLKHLTSK**

**Confirmed sites:** @T:2,@S:11

**Ambiguous sites:**

**MS/MS Fragmentation of ITSKGLKHLTSK**

Found in **CCD71\_MOUSE**, Coiled-coil domain-containing protein 71 OS=Mus musculus GN=Ccdc71 PE=2 SV=1

Match to Query 3507: 1539.850578 from(514.290802,3+)

Title: Elution from: 43.023 to 43.023 scan no 4053 cid35.00 polarity:+:MA10

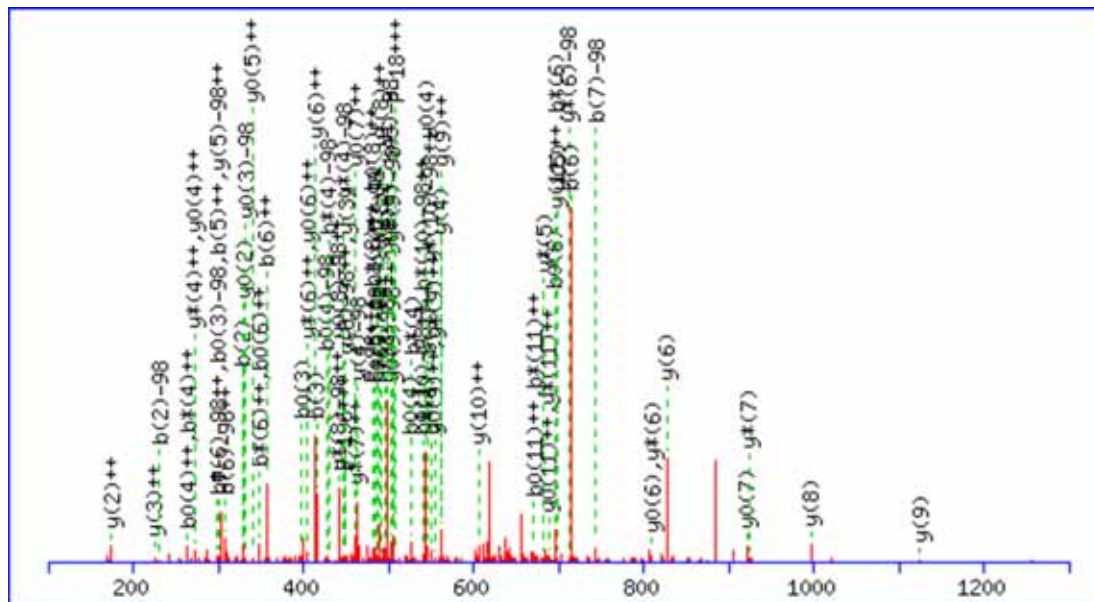

**Monoisotopic mass of neutral peptide Mr(calc):** 1539.8463

**Fixed modifications:** Carbamidomethyl (C) (apply to specified residues or termini only)

**Variable modifications:**

**N-term :** Dimethyl:2H(4)13C(2) (N-term)

**T2 :** Phospho (ST), with neutral losses 0.0000(shown in table), 97.9769

**S11 :** Phospho (ST), with neutral losses 0.0000(shown in table), 97.9769

**K12 :** Dimethyl:2H(4)13C(2) (K)

**Ions Score:** 29 **Expect:** 0.047

**Matched b ions:** b(2), b(2)-98, b(3), b(4), b(4)++, b(5)-98, b(5)++, b(6)++, b(6), b(6)-98++, b(7)-98, b(8)++, b(8)-98++, b(9)-98++, b(9)++, b(11)-98++

**Matched y ions:** y(2)++, y(3)++, y(3), y(4)-98, y(4), y(5)-98++, y(5), y(6)++, y(6), y(8)++, y(8), y(8)-98++, y(9), y(9)++, y(10)++, y(11)++, y(11)-98++

**Precursor origin neutral loss:**

## Peptide No.453

**ITTNSMGASPESLMVLSNDSGHEEVKEK**

**Confirmed sites:** @T:2,@T:3,@S:6,@S:10,@S:21

**Ambiguous sites:**

MS/MS Fragmentation of **ITTNSMGASPESLMVLSNDSGHEEVKEK**

Found in **OSMR\_MOUSE**, Oncostatin-M-specific receptor subunit beta OS=Mus musculus GN=Osmr PE=1 SV=1

Match to Query 7556: 3565.369365 from(1189.463731,3+)

Title: Elution from: 51.254 to 51.254 scan no 4875 cid35.00 polarity:+:MA10

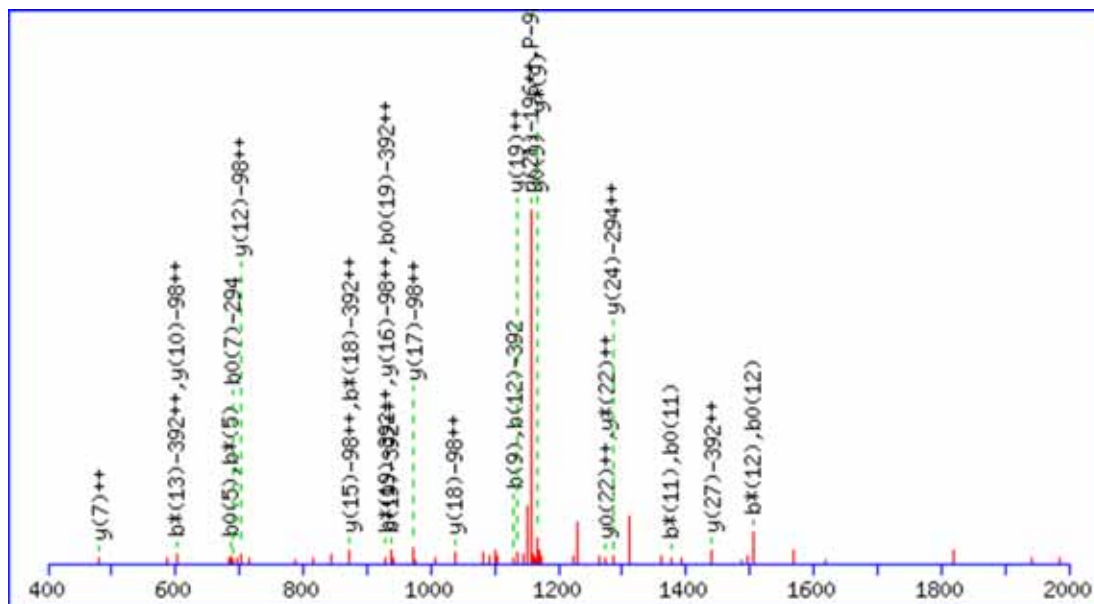

**Monoisotopic mass of neutral peptide Mr(calc):** 3565.3698

**Fixed modifications:** Carbamidomethyl (C) (apply to specified residues or termini only)

**Variable modifications:**

T2 : Phospho (ST), with neutral losses 97.9769(shown in table), 0.0000

T3 : Phospho (ST), with neutral losses 97.9769(shown in table), 0.0000

S6 : Phospho (ST), with neutral losses 97.9769(shown in table), 0.0000

S10 : Phospho (ST), with neutral losses 97.9769(shown in table), 0.0000

S21 : Phospho (ST), with neutral losses 97.9769(shown in table), 0.0000

K27 : Dimethyl (K)

K29 : Dimethyl:2H(4)13C(2) (K)

**Ions Score:** 40 **Expect:** 0.0041

**Matched b ions:** b(8)-98++, b(9), b(10)-196, b(12)-392, b(19)-392++, b(20)-196++, b(22)-294++, b(23)-196++

**Matched y ions:** y(7)++, y(10)-98++, y(12)-98++, y(15)-98++, y(16)-98++, y(17)-98++, y(18)-98++, y(19)++, y(20)-98++, y(21)-196++, y(24)-294++, y(26)-98++, y(27)-392++

**Precursor origin neutral loss:** +

## Peptide No.454

**IVETINSDSDSEFGIPK**

**Confirmed sites:** @S:7,@S:9

**Ambiguous sites:**

MS/MS Fragmentation of **IVETINSDSDSEFGIPK**

Found in **TOP2B\_MOUSE**, DNA topoisomerase 2-beta OS=Mus musculus GN=Top2b PE=1 SV=2

Match to Query 5319: 2065.891198 from(1033.952875,2+)

Title: Elution from: 56.486 to 56.486 scan no 5337 cid35.00 polarity:+:MA10:m1s





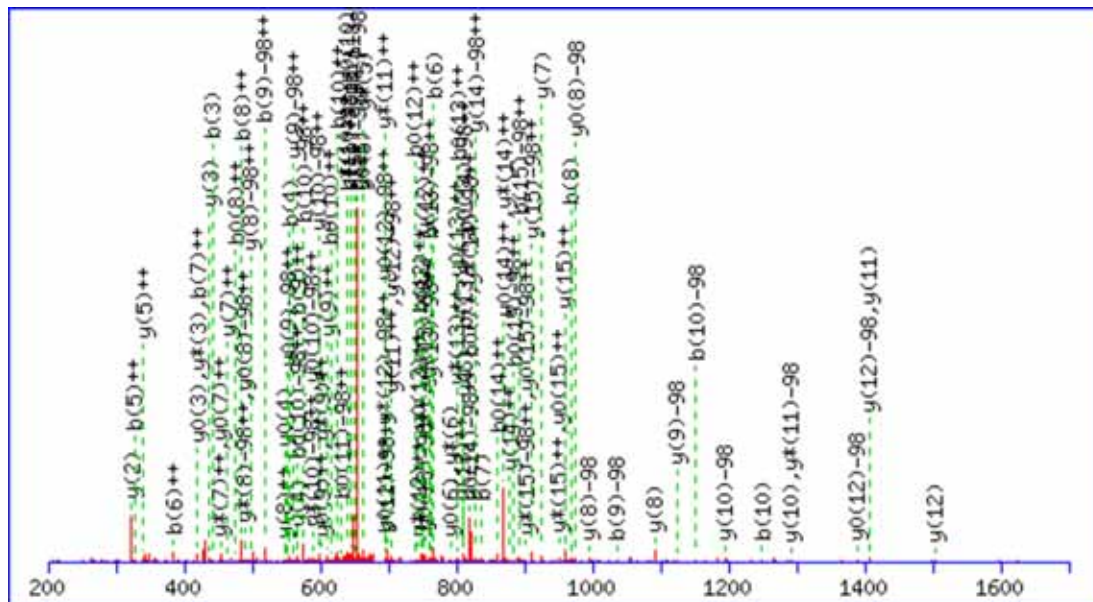

**Monoisotopic mass of neutral peptide Mr(calc):** 2057.8507

**Fixed modifications:** Carbamidomethyl (C) (apply to specified residues or termini only)

**Variable modifications:**

**N-term :** Dimethyl (N-term)

**S9 :** Phospho (ST), with neutral losses 97.9769(shown in table), 0.0000

**K16 :** Dimethyl (K)

**Ions Score:** 36 **Expect:** 0.0091

**Matched b ions:** b(3), b(4), b(5)++, b(5), b(6), b(6)++, b(7)++, b(7), b(8)++, b(8), b(9)-98++, b(9)++, b(9)-98, b(10)-98++, b(10), b(10)-98, b(10)++, b(11)-98++, b(12)-98++, b(12)++, b(13)-98++, b(13)++, b(14)++, b(14)-98++, b(15)-98++

**Matched y ions:** y(2), y(3), y(4), y(5)++, y(6), y(7), y(7)++, y(8), y(8)-98, y(8)-98++, y(8)++, y(9)-98, y(9)-98++, y(9)++, y(10)-98, y(10), y(10)-98++, y(10)++, y(11)-98++, y(11), y(11)++, y(12)-98, y(12), y(12)++, y(12)-98++, y(13)++, y(13)-98++, y(14)-98++, y(14)++, y(15)++, y(15)-98++

**Precursor origin neutral loss:** +

## Peptide No.456

**IYHLPDAESDEDEDFK**

**Confirmed sites: @S:9**

**Ambiguous sites:**

MS/MS Fragmentation of **IYHLPDAESDEDEDFK**

Found in **SEPT2\_MOUSE**, Septin-2 OS=Mus musculus GN=Sept2 PE=1 SV=2

Match to Query 6825: 2069.916129 from(690.979319,3+)

Title: Elution from: 46.230 to 46.230 scan no 4471 cid35.00 polarity:+:MA10:m1s

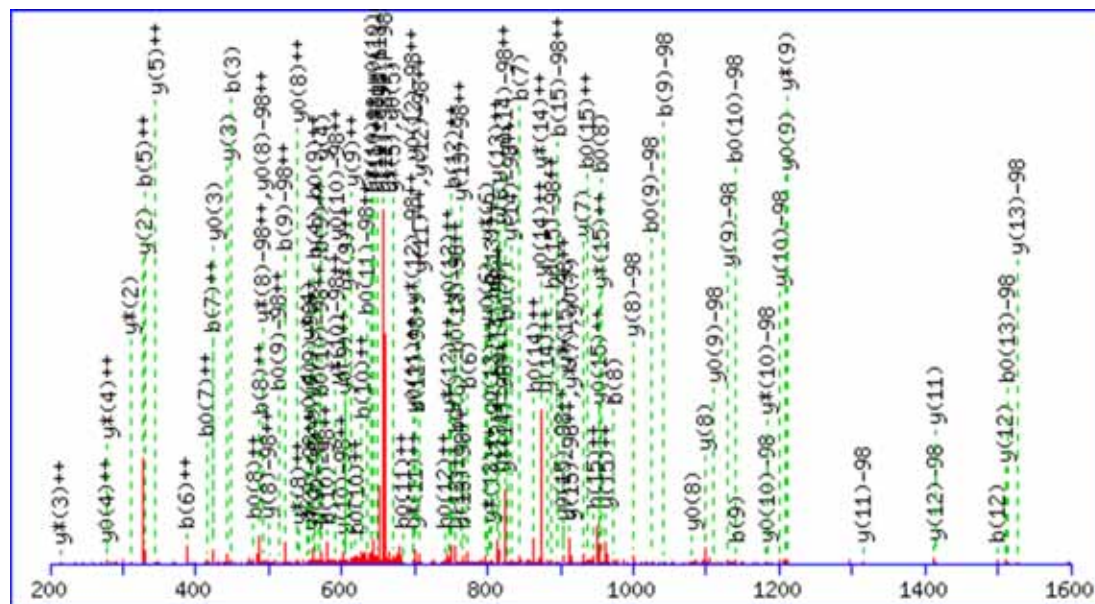

**Monoisotopic mass of neutral peptide Mr(calc):** 2069.9143

**Fixed modifications:** Carbamidomethyl (C) (apply to specified residues or termini only)

**Variable modifications:**

**N-term :** Dimethyl:2H(4)13C(2) (N-term)

**S9 :** Phospho (ST), with neutral losses 97.9769(shown in table), 0.0000

**K16 :** Dimethyl:2H(4)13C(2) (K)

**Ions Score:** 60 **Expect:** 4.8e-005

**Matched b ions:** b(2), b(3), b(4), b(5), b(5)++, b(6)++, b(6), b(7)++, b(7), b(8)++, b(8), b(9)-98++, b(9), b(9)++, b(9)-98, b(10)-98++, b(10)++, b(11)-98++, b(12)++, b(12), b(12)-98++, b(13)-98++, b(13)++, b(14)++, b(14)-98++, b(15)++, b(15)-98++

**Matched y ions:** y(2), y(3), y(4), y(5)++, y(6), y(7), y(8), y(8)-98, y(8)-98++, y(9)-98, y(9)-98++, y(9)++, y(10)-98, y(10)-98++, y(10)++, y(11)-98++, y(11)-98, y(11), y(11)++, y(12)-98, y(12)++, y(12), y(12)-98++, y(13)-98, y(13)++, y(13)-98++, y(14)-98++, y(14)++, y(15)++, y(15)-98++

**Precursor origin neutral loss:** +

## Peptide No.457

**IYHLPDAESDEDEDFKEQTR**

**Confirmed sites:** @S:9

**Ambiguous sites:**

MS/MS Fragmentation of **IYHLPDAESDEDEDFKEQTR**

Found in **SEPT2\_MOUSE**, Septin-2 OS=Mus musculus GN=Sept2 PE=1 SV=2

Match to Query 6258: 2572.100976 from(644.032520,4+)

Title: Elution from: 42.952 to 42.952 scan no 3754 cid35.00 polarity:+:MA10:m1s

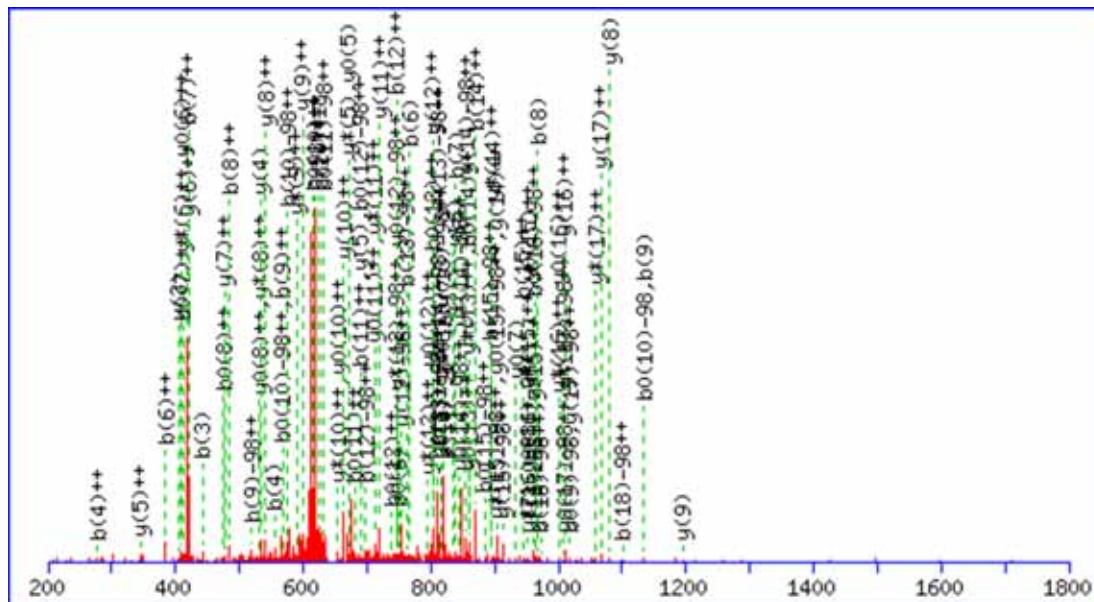

**Monoisotopic mass of neutral peptide Mr(calc):** 2572.1006

**Fixed modifications:** Carbamidomethyl (C) (apply to specified residues or termini only)

**Variable modifications:**

**N-term :** Dimethyl (N-term)

**S9 :** Phospho (ST), with neutral losses 97.9769(shown in table), 0.0000

**K16 :** Dimethyl (K)

**Ions Score:** 37 **Expect:** 0.013

**Matched b ions:** b(3), b(4)++, b(4), b(6)++, b(6), b(7)++, b(7), b(8)++, b(8), b(9), b(9)-98++, b(9)++, b(10)++, b(10)-98++, b(11)++, b(12)-98++, b(12)++, b(13)++, b(13)-98++, b(14)-98++, b(14)++, b(15)-98++, b(15)++, b(16)-98++, b(18)-98++

**Matched y ions:** y(3), y(4), y(5)++, y(5), y(6)++, y(6), y(7)++, y(7), y(8), y(8)++, y(9)++, y(9), y(10)++, y(11)++, y(12)-98++, y(12)++, y(13)-98++, y(14)++, y(14)-98++, y(15)-98++, y(15)++, y(16)++, y(16)-98++, y(17)++, y(17)-98++

**Precursor origin neutral loss:** +

## Peptide No.458

**IYHLPDAESDEDEDKFKEQTR**

**Confirmed sites:** @S:9

**Ambiguous sites:**

**MS/MS Fragmentation of IYHLPDAESDEDEDKFKEQTR**

Found in **SEPT2\_MOUSE**, Septin-2 OS=Mus musculus GN=Sept2 PE=1 SV=2

Match to Query 6147: 2584.164484 from(647.048397,4+)

Title: Elution from: 42.956 to 42.956 scan no 3783 cid35.00 polarity:+:MA10:m1s

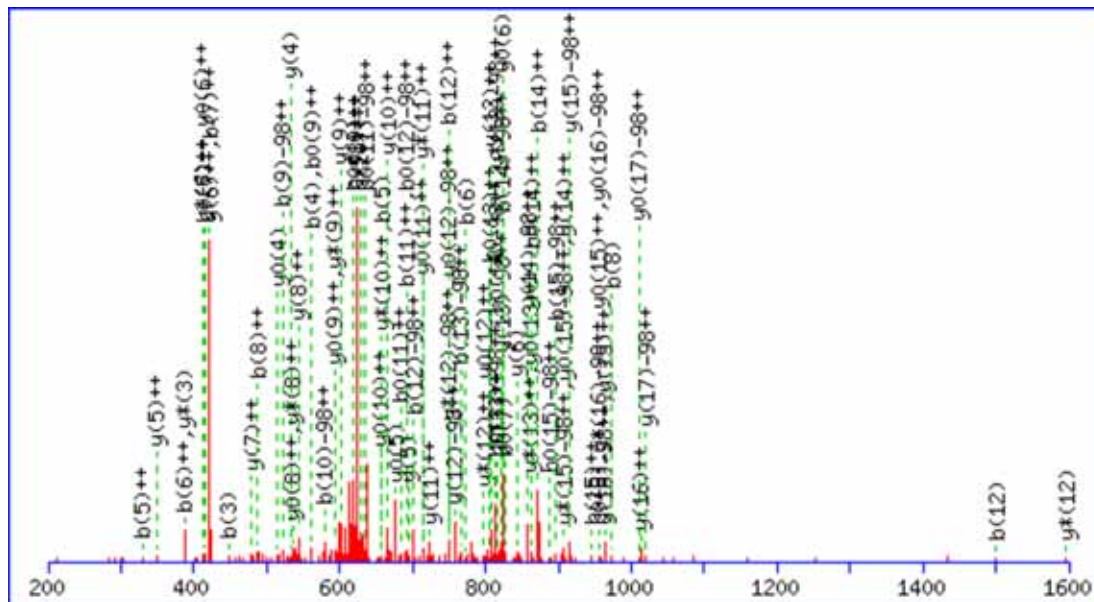

**Monoisotopic mass of neutral peptide Mr(calc):** 2584.1642

**Fixed modifications:** Carbamidomethyl (C) (apply to specified residues or termini only)

**Variable modifications:**

**N-term :** Dimethyl:2H(4)13C(2) (N-term)

**S9 :** Phospho (ST), with neutral losses 97.9769(shown in table), 0.0000

**K16 :** Dimethyl:2H(4)13C(2) (K)

**Ions Score:** 39 **Expect:** 0.0091

**Matched b ions:** b(3), b(4), b(5)++, b(5), b(6)++, b(6), b(7)++, b(8)++, b(8), b(9)-98++, b(10)-98++, b(10)++, b(11)++, b(12), b(12)++, b(12)-98++, b(13)-98++, b(13)++, b(14)-98++, b(14)++, b(15)++, b(15)-98++

**Matched y ions:** y(4), y(5)++, y(5), y(6)++, y(6), y(7)++, y(8)++, y(9)++, y(10)++, y(11)++, y(12)-98++, y(12)++, y(13)-98++, y(14)-98++, y(14)++, y(15)++, y(15)-98++, y(16)-98++, y(16)++, y(17)-98++

**Precursor origin neutral loss:** +

## Peptide No.459

**IYQFPDCDSDEDEDFK**

**Confirmed sites:** @S:9

**Ambiguous sites:**

**MS/MS Fragmentation of IYQFPDCDSDEDEDFK**

Found in **SEPT4\_MOUSE**, Septin-4 OS=Mus musculus GN=Sept4 PE=1 SV=1

Match to Query 6314: 2157.812506 from(1079.913529,2+)

Title: Elution from: 51.896 to 51.896 scan no 5131 cid35.00 polarity:+:MA10



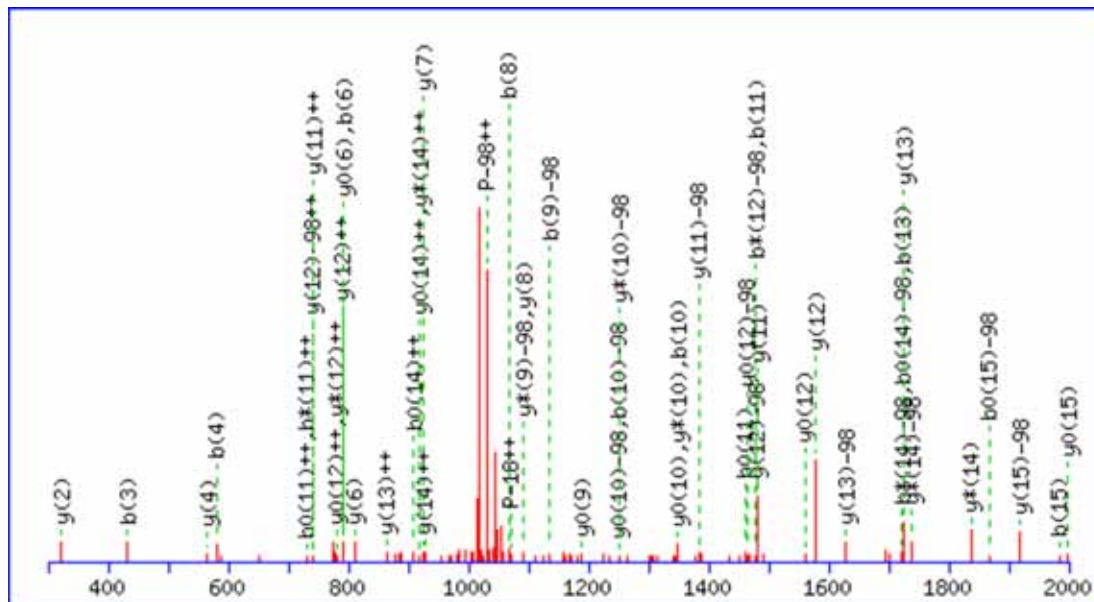

**Monoisotopic mass of neutral peptide Mr(calc):** 2157.8126

**Fixed modifications:** Carbamidomethyl (C) (apply to specified residues or termini only)

**Variable modifications:**

**N-term :** Dimethyl (N-term)

**S9 :** Phospho (ST), with neutral losses 0.0000(shown in table), 97.9769

**K16 :** Dimethyl (K)

**Ions Score:** 28 **Expect:** 0.033

**Matched b ions:** b(3), b(4), b(6), b(8), b(9)-98, b(10), b(10)-98, b(11), b(13), b(14), b(14)-98, b(14)++, b(15)

**Matched y ions:** y(2), y(4), y(6), y(7), y(8), y(11), y(11)-98, y(11)++, y(12)-98, y(12)++, y(12)-98++, y(13)-98, y(13)++, y(14)++, y(15)-98

**Precursor origin neutral loss:** +

## Peptide No.460

**KALTDAGCNLSPLQYIK**

**Confirmed sites:** @T:4,@S:11,@Y:15

**Ambiguous sites:**

**MS/MS Fragmentation of** **KALTDAGCNLSPLQYIK**

Found in **SCFD1\_MOUSE**, Sec1 family domain-containing protein 1 OS=Mus musculus GN=Scfd1 PE=2 SV=1

Match to Query 5155: 2192.984445 from(732.002091,3+)

Title: Elution from: 39.055 to 39.055 scan no 3235 cid35.00 polarity:+:MA10

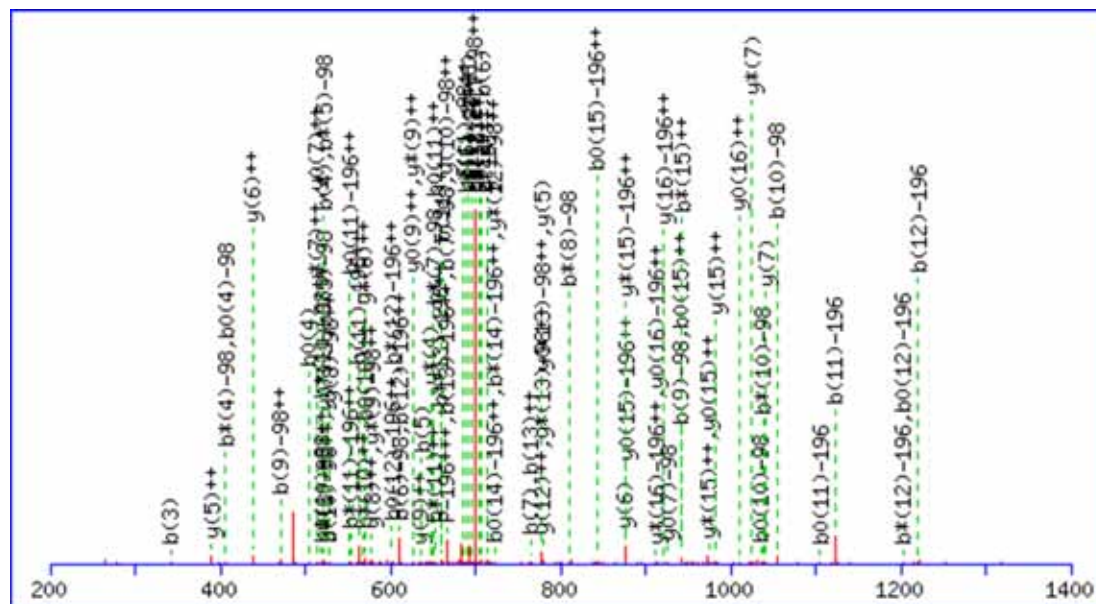

**Monoisotopic mass of neutral peptide Mr(calc):** 2192.9807

**Fixed modifications:** Carbamidomethyl (C) (apply to specified residues or termini only)

**Variable modifications:**

K1 : Dimethyl (K)

T4 : Phospho (ST), with neutral losses 97.9769(shown in table), 0.0000

S11 : Phospho (ST), with neutral losses 97.9769(shown in table), 0.0000

Y15 : Phospho (Y)

K17 : Dimethyl:2H(4)13C(2) (K)

**Ions Score:** 36 **Expect:** 0.015

**Matched b ions:** b(3), b(4), b(5), b(6)-98, b(6), b(7)-98, b(7), b(9)-98, b(9)-98++, b(10)-98, b(10)-98++, b(11)-98, b(11)-98++, b(11)-196, b(11)-196++, b(11)++, b(12)-196, b(12)-196++, b(12)-98, b(12)-98++, b(12)++, b(13)-196, b(13)-196++, b(13)-98, b(13)-98++, b(13)++

**Matched y ions:** y(5)++, y(5), y(6), y(6)++, y(7)++, y(7), y(8)++, y(8)-98, y(8)-98++, y(9)++, y(10)-98, y(10)-98++, y(10)++, y(11)-98, y(11)-98++, y(12)++, y(15)++, y(16)-196, y(16)-196++

**Precursor origin neutral loss:** +

## Peptide No.461

**KDELSDWSLAGEDDRETR**

**Confirmed sites:** @S:5,@S:8

**Ambiguous sites:**

**MS/MS Fragmentation of KDELSDWSLAGEDDRETR**

Found in **FXR1\_MOUSE**, Fragile X mental retardation syndrome-related protein 1 OS=Mus musculus  
GN=Fxr1 PE=1 SV=2

Match to Query 7148: 2336.958474 from(779.993434,3+)

Title: Elution from: 46.578 to 46.578 scan no 4494 cid35.00 polarity:+:MA10:m1s



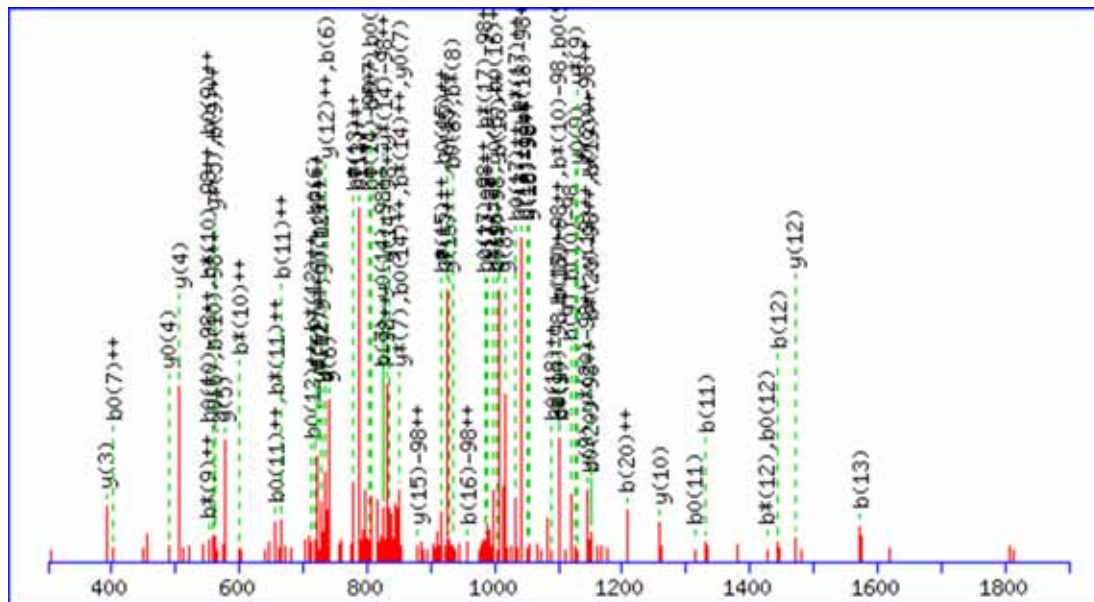

**Monoisotopic mass of neutral peptide Mr(calc): 2588.0731**

**Fixed modifications:** Carbamidomethyl (C) (apply to specified residues or termini only)

**Variable modifications:**

**N-term :** Dimethyl (N-term)

**K1 :** Dimethyl (K)

**S9 :** Phospho (ST), with neutral losses 0.0000(shown in table), 97.9769

**K21 :** Dimethyl (K)

**Ions Score:** 49 **Expect:** 0.00066

**Matched b ions:** b(6), b(7), b(9), b(9)++, b(10)-98, b(10)-98++, b(11)++, b(11), b(12), b(12)++, b(13)++, b(13), b(15)++, b(16)++, b(16)-98++, b(17)++, b(18)++, b(18)-98++, b(19)-98++, b(19)++, b(20)++

**Matched y ions:** y(3), y(4), y(5), y(6), y(8), y(9), y(10), y(12), y(12)++, y(14)-98++, y(15)++, y(15)-98++, y(17)-98++, y(18)++, y(18)-98++, y(19)++

**Precursor origin neutral loss:** +

## Peptide No.463

**KEESEESDDDMGFGLFD**

**Confirmed sites:** @S:4

**Ambiguous sites:**

**MS/MS Fragmentation of KEESEESDDDMGFGLFD**

Found in **RLA2\_MOUSE**, 60S acidic ribosomal protein P2 OS=Mus musculus GN=Rplp2 PE=1 SV=3

Match to Query 5260: 2100.777298 from(1051.395925,2+)

Title: Elution from: 58.619 to 58.619 scan no 5532 cid35.00 polarity:+:MA10:m1s



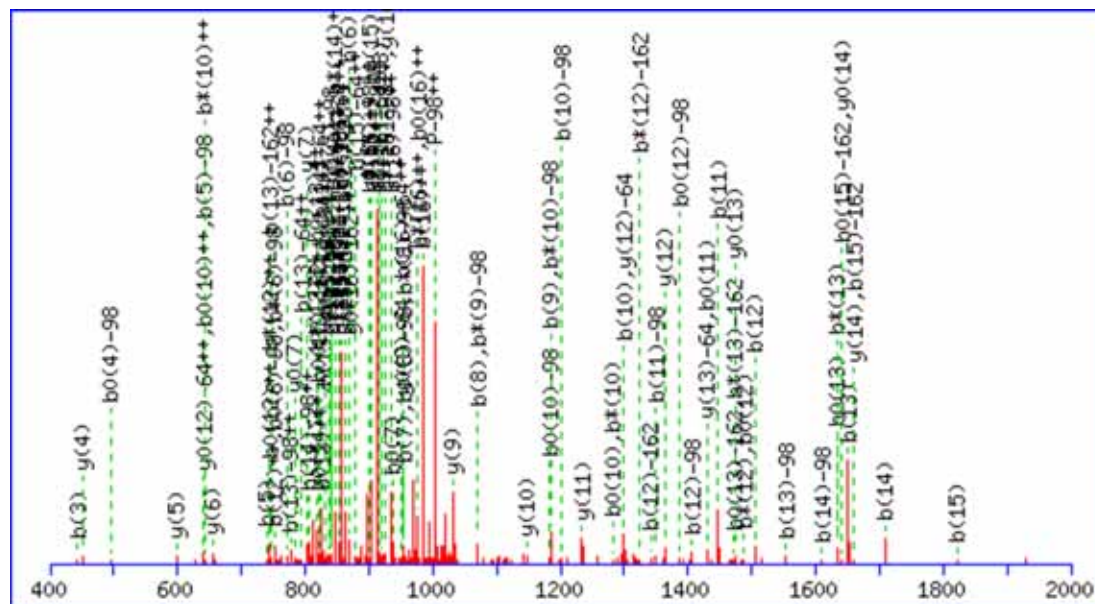

**Monoisotopic mass of neutral peptide Mr(calc):** 2100.7759

**Fixed modifications:** Carbamidomethyl (C) (apply to specified residues or termini only)

**Variable modifications:**

**N-term :** Dimethyl (N-term)

**K1 :** Dimethyl (K)

**S4 :** Phospho (ST), with neutral losses 0.0000(shown in table), 97.9769

**M11 :** Oxidation (M), with neutral losses 0.0000(shown in table), 63.9983

**Ions Score:** 78 **Expect:** 2.9e-007

**Matched b ions:** b(3), b(5)-98, b(5), b(6), b(6)-98, b(7), b(8), b(9), b(10), b(10)-98, b(11), b(11)-98, b(12), b(12)-98, b(12)++, b(13)++, b(13), b(13)-98, b(13)-98++, b(14)++, b(14), b(14)-98++, b(14)-98, b(15)++, b(15), b(15)-98++, b(16)++, b(16)-98++

**Matched y ions:** y(4), y(5), y(6), y(7), y(8), y(9), y(10), y(11), y(12), y(14), y(14)++, y(15)-98++

**Precursor origin neutral loss:** +

## Peptide No.464

**KEESEESDDDMGFGLFD**

**Confirmed sites:** @S:4,@S:7

**Ambiguous sites:**

MS/MS Fragmentation of **KEESEESDDDMGFGLFD**

Found in **RLA2\_MOUSE**, 60S acidic ribosomal protein P2 OS=Mus musculus GN=Rplp2 PE=1 SV=3

Match to Query 6425: 2180.743048 from(1091.378800,2+)

Title: Elution from: 69.135 to 69.135 scan no 6690 cid35.00 polarity:+:MA10:m1s



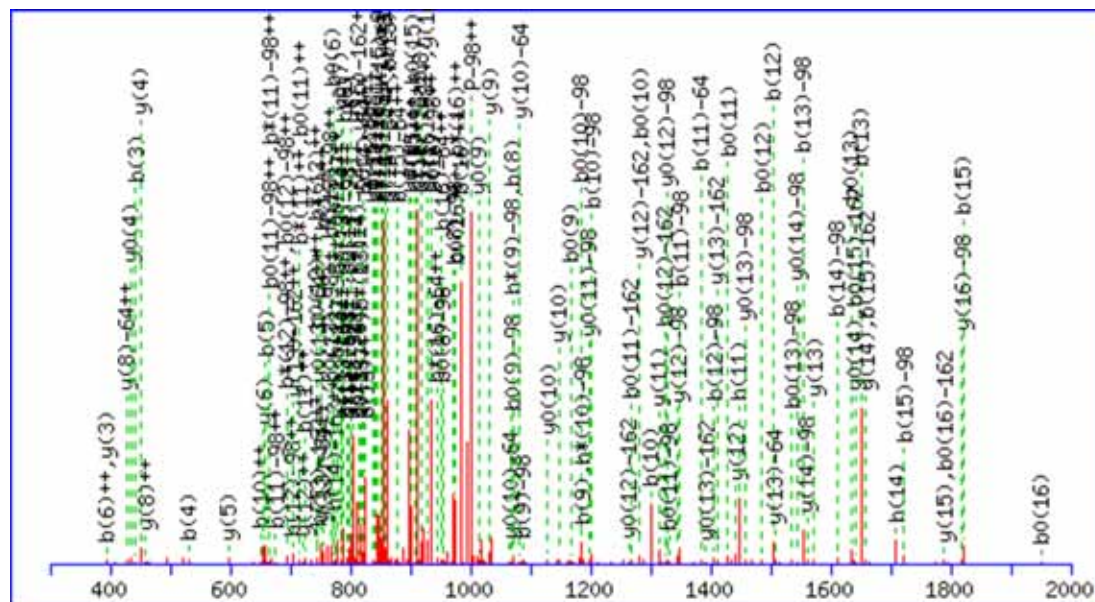

**Monoisotopic mass of neutral peptide Mr(calc):** 2100.7759

**Fixed modifications:** Carbamidomethyl (C) (apply to specified residues or termini only)

**Variable modifications:**

**N-term :** Dimethyl (N-term)

**K1 :** Dimethyl (K)

**S7 :** Phospho (ST), with neutral losses 0.0000(shown in table), 97.9769

**M11 :** Oxidation (M), with neutral losses 0.0000(shown in table), 63.9983

**Ions Score:** 70 **Expect:** 1.7e-006

**Matched b ions:** b(3), b(4), b(5), b(6), b(6)++, b(7)-98, b(8), b(8)-98, b(9), b(9)-98, b(10)-98, b(10), b(10)++, b(11), b(11)-98, b(11)-98++, b(11)++, b(12), b(12)++, b(12)-98, b(12)-98++, b(13)-98, b(13), b(13)-98++, b(13)++, b(14)++, b(14), b(14)-98++, b(14)-98, b(15)++, b(15), b(15)-98++, b(15)-98, b(16)++, b(16)-98++

**Matched y ions:** y(3), y(4), y(5), y(6), y(7), y(8)++, y(8), y(9), y(10), y(11), y(12), y(12)-98, y(12)++, y(13), y(14)-98, y(14), y(15), y(15)-98++, y(16)-98, y(16)-98++

**Precursor origin neutral loss:** +

## Peptide No.466

**KEESEESDDDMGFGLFD**

**Confirmed sites:** @S:4

**Ambiguous sites:**

MS/MS Fragmentation of **KEESEESDDDMGFGLFD**

Found in **RLA2\_MOUSE**, 60S acidic ribosomal protein P2 OS=Mus musculus GN=Rplp2 PE=1 SV=3

Match to Query 6087: 2084.784412 from(1043.399482,2+)

Title: Elution from: 66.413 to 66.413 scan no 6464 cid35.00 polarity:+:MA10:m1s

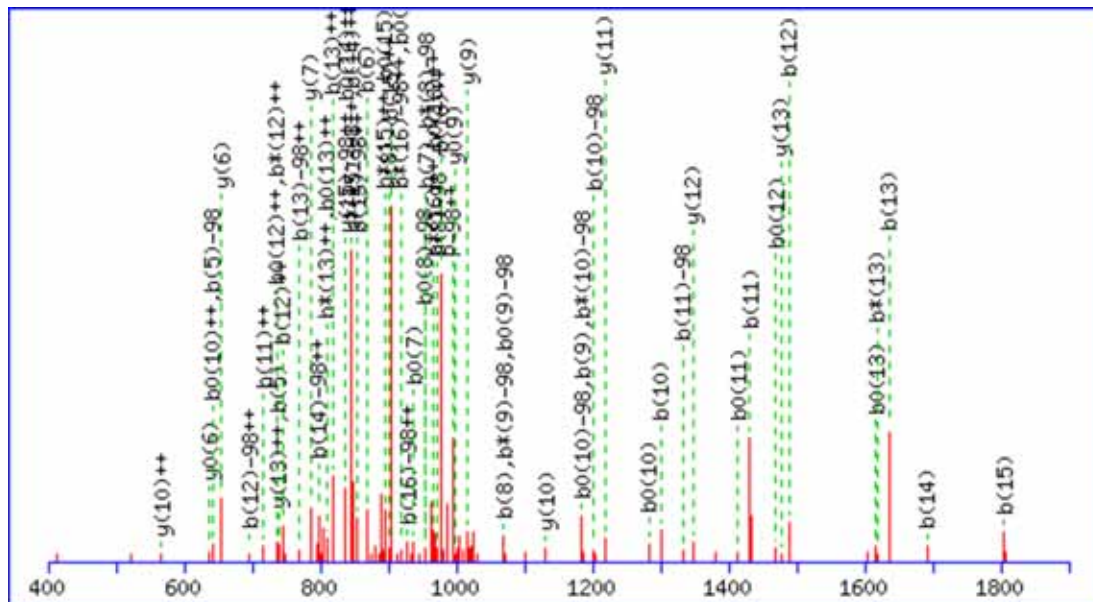

**Monoisotopic mass of neutral peptide Mr(calc):** 2084.7809

**Fixed modifications:** Carbamidomethyl (C) (apply to specified residues or termini only)

**Variable modifications:**

**N-term :** Dimethyl (N-term)

**K1 :** Dimethyl (K)

**S4 :** Phospho (ST), with neutral losses 0.0000(shown in table), 97.9769

**Ions Score:** 55 **Expect:** 6.6e-005

**Matched b ions:** b(5)-98, b(5), b(6), b(7), b(8), b(8)-98, b(9), b(10), b(10)-98, b(11), b(11)-98, b(11)++, b(12)++, b(12), b(12)-98++, b(13), b(13)++, b(13)-98++, b(14)-98++, b(14)++, b(14), b(15)++, b(15), b(15)-98++, b(16)++, b(16)-98++

**Matched y ions:** y(6), y(7), y(8), y(9), y(10)++, y(10), y(11), y(12), y(13), y(13)++, y(15)-98++

**Precursor origin neutral loss:** +

## Peptide No.467

**KEESEESDDDMGFGLFD**

**Confirmed sites:** @S:4,@S:7

**Ambiguous sites:**

MS/MS Fragmentation of **KEESEESDDDMGFGLFD**

Found in **RLA2\_MOUSE**, 60S acidic ribosomal protein P2 OS=Mus musculus GN=Rplp2 PE=1 SV=3

Match to Query 5002: 2164.749058 from(1083.381805,2+)

Title: Elution from: 74.726 to 74.726 scan no 6760 cid35.00 polarity:+MA10:m1s















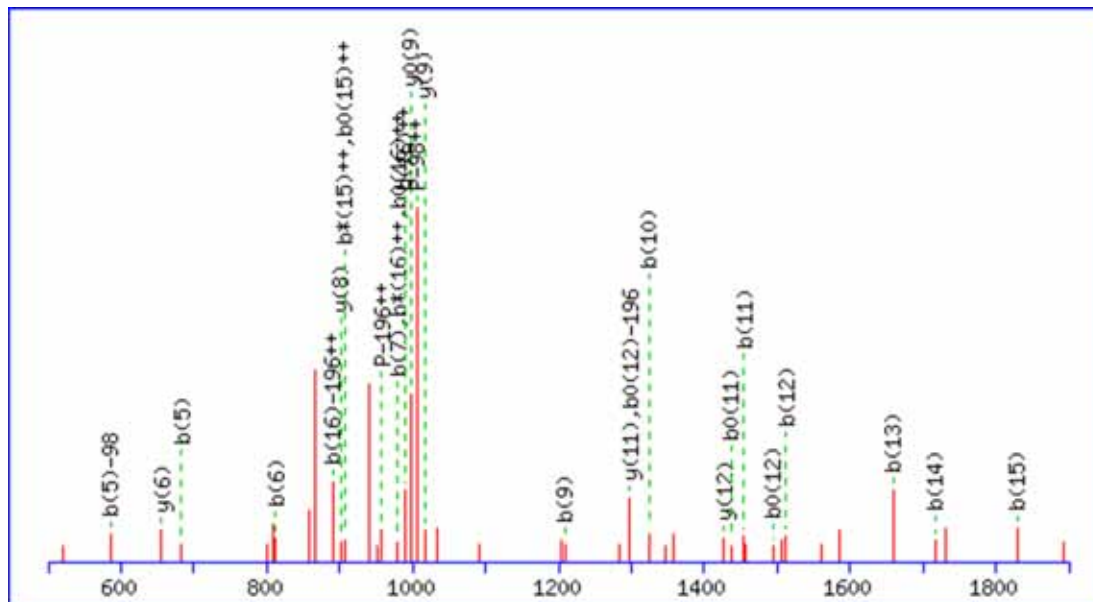

**Monoisotopic mass of neutral peptide Mr(calc):** 2108.6847

**Fixed modifications:** Carbamidomethyl (C) (apply to specified residues or termini only)

**Variable modifications:**

**S4 :** Phospho (ST), with neutral losses 0.0000(shown in table), 97.9769

**S7 :** Phospho (ST), with neutral losses 0.0000(shown in table), 97.9769

**Ions Score:** 48 **Expect:** 0.00011

**Matched b ions:** b(5)-98, b(5), b(6), b(7), b(9), b(10), b(11)-98, b(11), b(12), b(13), b(13)-98, b(14)-98++, b(14), b(15)-98++, b(15)-98, b(15), b(16)-196++, b(16)-98++, b(16)++

**Matched y ions:** y(6), y(8), y(9), y(11), y(12)

**Precursor origin neutral loss:** +

## Peptide No.473

**KEESESEDDMGFGLFD**

**Confirmed sites:** @S:4,@S:7

**Ambiguous sites:**

MS/MS Fragmentation of **KEESESEDDMGFGLFD**

Found in **RLA1\_MOUSE**, 60S acidic ribosomal protein P1 OS=Mus musculus GN=Rplp1 PE=1 SV=1

Match to Query 6350: 2166.728508 from(1084.371530,2+)

Title: Elution from: 66.005 to 66.005 scan no 6426 cid35.00 polarity:+:MA10:m1s



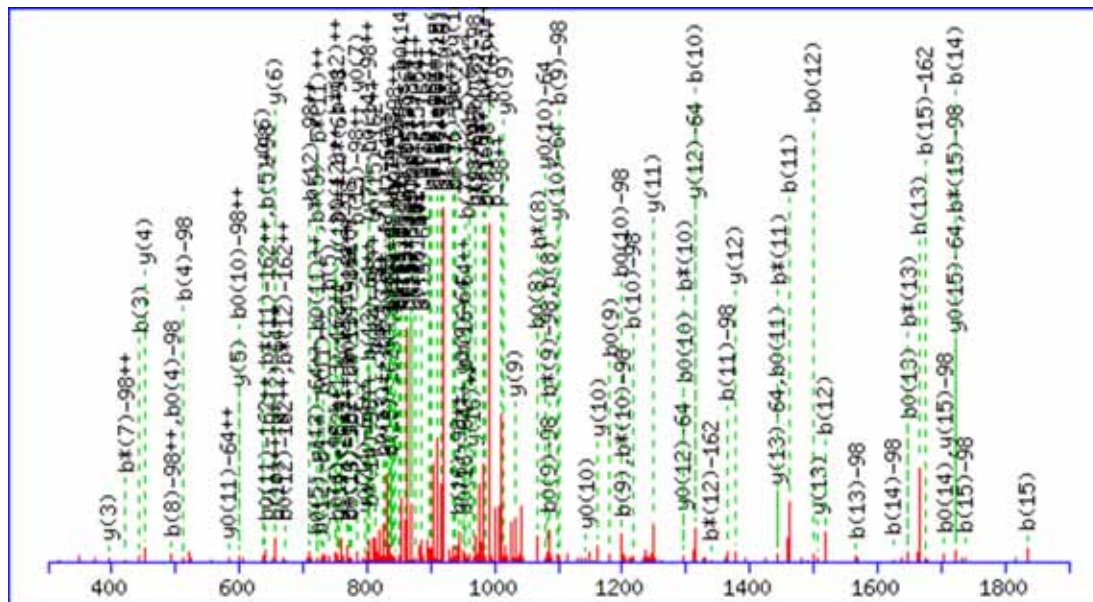

**Monoisotopic mass of neutral peptide Mr(calc):** 2114.7915

**Fixed modifications:** Carbamidomethyl (C) (apply to specified residues or termini only)

**Variable modifications:**

**N-term :** Dimethyl (N-term)

**K1 :** Dimethyl (K)

**S4 :** Phospho (ST), with neutral losses 0.0000(shown in table), 97.9769

**M11 :** Oxidation (M), with neutral losses 0.0000(shown in table), 63.9983

**Ions Score:** 55 **Expect:** 6e-005

**Matched b ions:** b(3), b(4)-98, b(5)-98, b(5), b(6)-98, b(6), b(7), b(8)-98++, b(8), b(8)-98, b(9), b(9)-98, b(10), b(10)++, b(10)-98, b(11)-98, b(11), b(11)++, b(12), b(12)-98++, b(12)++, b(13), b(13)-98, b(13)++, b(13)-98++, b(14)-98++, b(14)++, b(14), b(14)-98, b(15)++, b(15), b(15)-98, b(15)-98++, b(16)++, b(16)-98++

**Matched y ions:** y(3), y(4), y(5), y(6), y(7), y(8), y(9), y(10), y(11), y(12), y(13), y(13)++, y(14)++, y(15)-98++, y(15)-98, y(15)++, y(16)-98++, y(16)++

**Precursor origin neutral loss:** +

## Peptide No.475

**KEESESEDDMGFGLFD**

**Confirmed sites:** @S:4,@S:7

**Ambiguous sites:**

MS/MS Fragmentation of **KEESESEDDMGFGLFD**

Found in **RLA1\_MOUSE**, 60S acidic ribosomal protein P1 OS=Mus musculus GN=Rplp1 PE=1 SV=1

Match to Query 6542: 2194.759058 from(1098.386805,2+)

Title: Elution from: 71.008 to 71.008 scan no 6827 cid35.00 polarity:+:MA10:m1s



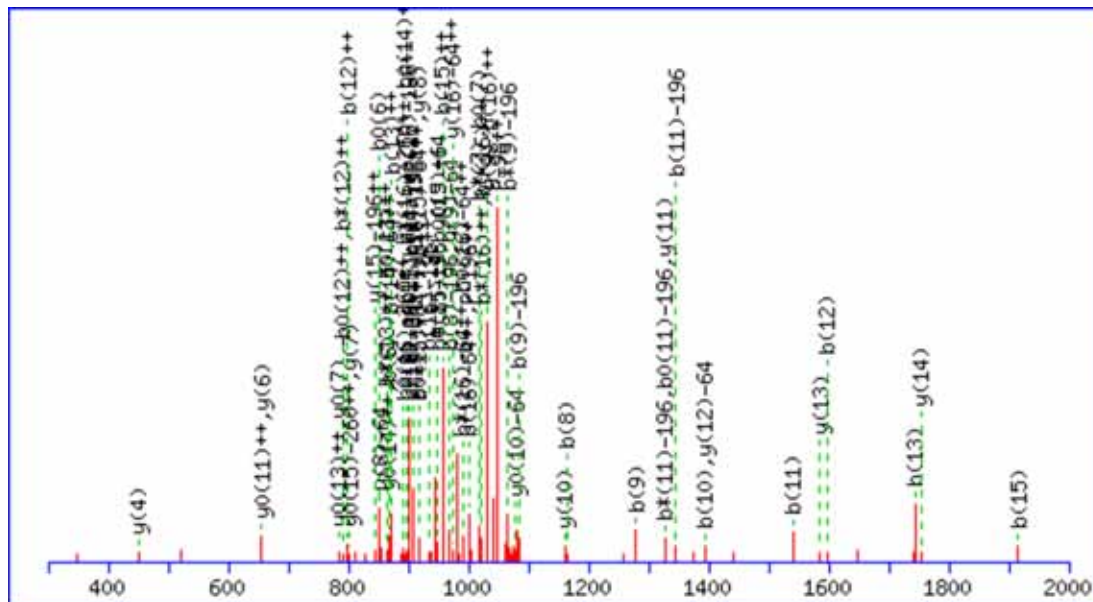

**Monoisotopic mass of neutral peptide Mr(calc):** 2194.7578

**Fixed modifications:** Carbamidomethyl (C) (apply to specified residues or termini only)

**Variable modifications:**

**N-term :** Dimethyl (N-term)

**K1 :** Dimethyl (K)

**S4 :** Phospho (ST), with neutral losses 0.0000(shown in table), 97.9769

**S7 :** Phospho (ST), with neutral losses 0.0000(shown in table), 97.9769

**M11 :** Oxidation (M), with neutral losses 0.0000(shown in table), 63.9983

**Ions Score:** 59 **Expect:** 1.3e-005

**Matched b ions:** b(6), b(7)-98, b(8), b(8)-98, b(8)-196, b(9), b(9)-196, b(10), b(11), b(11)-196, b(11)-98, b(12)++, b(12), b(13), b(13)-98, b(13)++, b(14)++, b(14)-98++, b(15), b(15)++, b(15)-98++, b(16)++, b(16)-98++, b(16)-196++

**Matched y ions:** y(4), y(6), y(7), y(8), y(9), y(10), y(11), y(13), y(14), y(15)-196++, y(15)-98++, y(16)-196++

**Precursor origin neutral loss:** +

## Peptide No.476

**KEESESEDDMGFGLFD**

**Confirmed sites:** @S:7

**Ambiguous sites:**

MS/MS Fragmentation of **KEESESEDDMGFGLFD**

Found in **RLA1\_MOUSE**, 60S acidic ribosomal protein P1 OS=Mus musculus GN=Rplp1 PE=1 SV=1

Match to Query 6211: 2114.793296 from(1058.403924,2+)

Title: Elution from: 58.190 to 58.190 scan no 5767 cid35.00 polarity:+:MA10

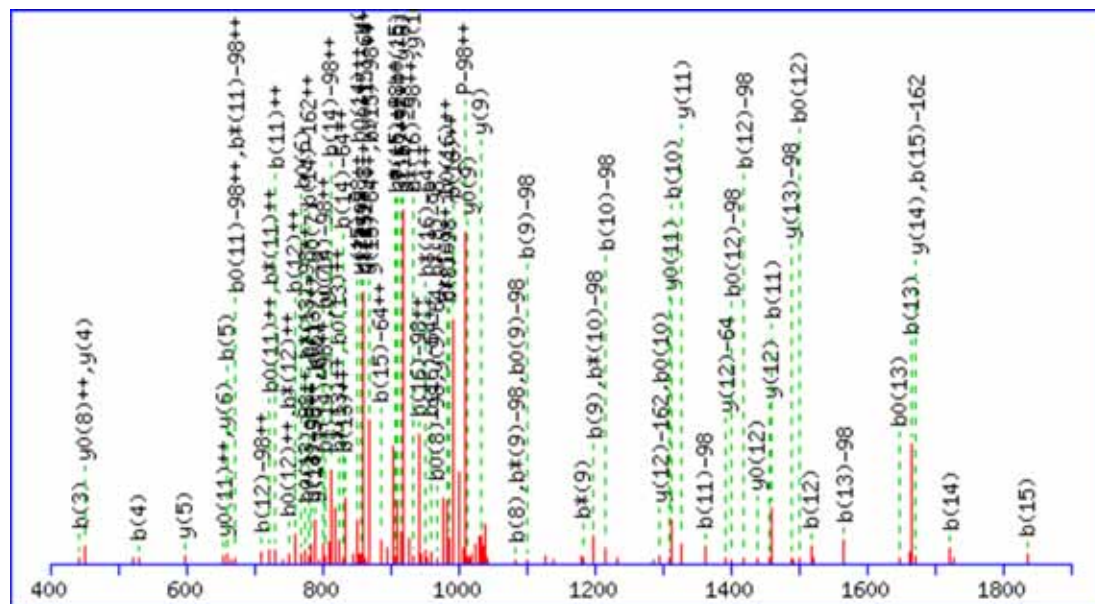

**Monoisotopic mass of neutral peptide Mr(calc):** 2114.7915

**Fixed modifications:** Carbamidomethyl (C) (apply to specified residues or termini only)

**Variable modifications:**

**N-term :** Dimethyl (N-term)

**K1 :** Dimethyl (K)

**S7 :** Phospho (ST), with neutral losses 0.0000(shown in table), 97.9769

**M11 :** Oxidation (M), with neutral losses 0.0000(shown in table), 63.9983

**Ions Score:** 71 **Expect:** 1.6e-006

**Matched b ions:** b(3), b(4), b(5), b(6), b(7)-98, b(8), b(8)-98, b(9), b(9)-98, b(10), b(10)-98, b(11)++, b(11)-98, b(12), b(12)-98++, b(12)-98, b(12)++, b(13)-98, b(13), b(13)++, b(13)-98++, b(14)-98++, b(14)++, b(15)++, b(15)-98++, b(16)++, b(16)-98++

**Matched y ions:** y(4), y(5), y(6), y(7), y(8), y(9), y(11), y(12), y(13)-98, y(14)-98++, y(14), y(15)-98++, y(16)-98++

**Precursor origin neutral loss:** +

## Peptide No.477

**KEESESEDDMGFGLFD**

**Confirmed sites:** @S:4

**Ambiguous sites:**

MS/MS Fragmentation of **KEESESEDDMGFGLFD**

Found in **RLA1\_MOUSE**, 60S acidic ribosomal protein P1 OS=Mus musculus GN=Rplp1 PE=1 SV=1

Match to Query 6143: 2098.799224 from(1050.406888,2+)

Title: Elution from: 66.216 to 66.216 scan no 6447 cid35.00 polarity:+:MA10:m1s

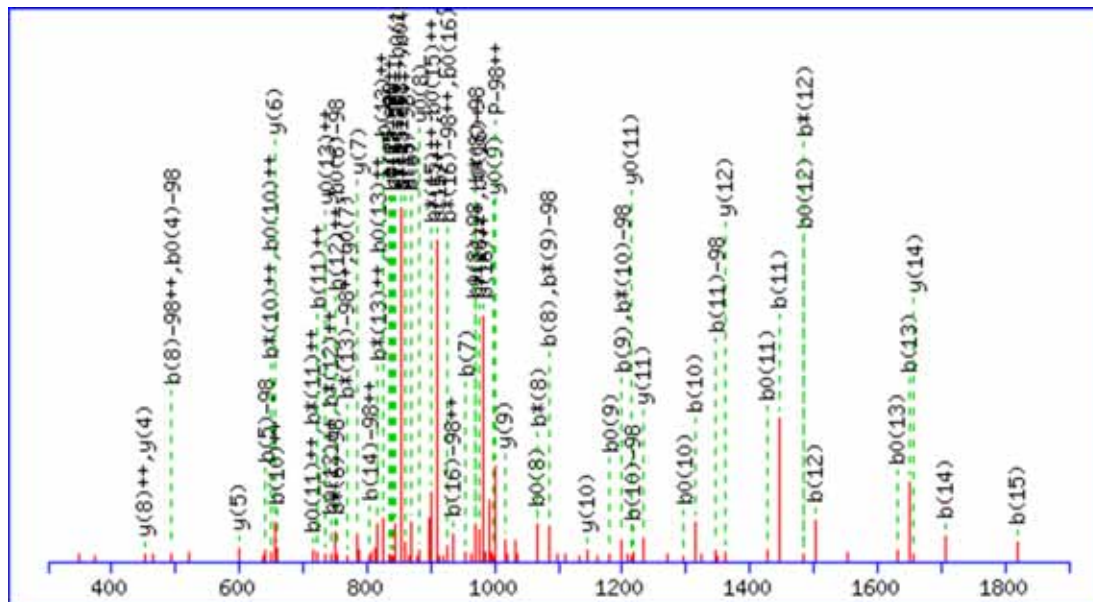

**Monoisotopic mass of neutral peptide Mr(calc):** 2098.7966

**Fixed modifications:** Carbamidomethyl (C) (apply to specified residues or termini only)

**Variable modifications:**

**N-term :** Dimethyl (N-term)

**K1 :** Dimethyl (K)

**S4 :** Phospho (ST), with neutral losses 0.0000(shown in table), 97.9769

**Ions Score:** 60 **Expect:** 2e-005

**Matched b ions:** b(5)-98, b(6), b(7), b(8), b(8)-98++, b(9), b(10), b(10)++, b(10)-98, b(11), b(11)-98, b(11)++, b(12), b(12)++, b(13)++, b(13), b(14)++, b(14), b(14)-98++, b(15), b(15)++, b(15)-98++, b(16)++, b(16)-98++

**Matched y ions:** y(4), y(5), y(6), y(7), y(8)++, y(8), y(9), y(10), y(11), y(12), y(14), y(15)-98++

**Precursor origin neutral loss:** +

## Peptide No.478

**KEESESEDDMGFGLFD**

**Confirmed sites:** @S:4,@S:7

**Ambiguous sites:**

MS/MS Fragmentation of **KEESESEDDMGFGLFD**

Found in **RLA1\_MOUSE**, 60S acidic ribosomal protein P1 OS=Mus musculus GN=Rplp1 PE=1 SV=1

Match to Query 6398: 2178.764374 from(1090.389463,2+)

Title: Elution from: 73.698 to 73.698 scan no 7006 cid35.00 polarity:+MA10:m1s

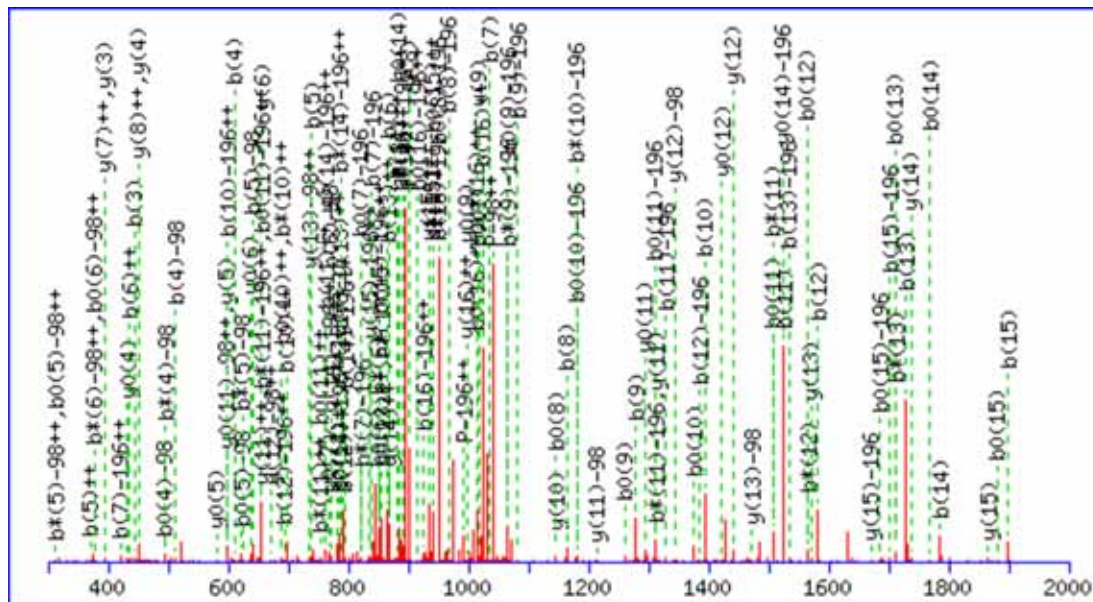

**Monoisotopic mass of neutral peptide Mr(calc):** 2178.7629

**Fixed modifications:** Carbamidomethyl (C) (apply to specified residues or termini only)

**Variable modifications:**

**N-term :** Dimethyl (N-term)

**K1 :** Dimethyl (K)

**S4 :** Phospho (ST), with neutral losses 0.0000(shown in table), 97.9769

**S7 :** Phospho (ST), with neutral losses 0.0000(shown in table), 97.9769

**Ions Score:** 63 **Expect:** 5.2e-006

**Matched b ions:** b(3), b(4)-98, b(4), b(5)-98, b(5)++, b(5), b(6), b(6)++, b(6)-98, b(7)-196++, b(7)-98, b(7)-196, b(7), b(8), b(8)-98, b(8)-196, b(9), b(9)-98, b(9)-196, b(10), b(10)++, b(10)-98, b(10)-196++, b(10)-98++, b(11)-98, b(11), b(11)++, b(11)-196, b(11)-98++, b(12)++, b(12), b(12)-98, b(12)-98++, b(12)-196++, b(12)-196, b(13)-98, b(13), b(13)++, b(13)-196, b(13)-98++, b(14)++, b(14), b(14)-98++, b(14)-98, b(14)-196++, b(15)++, b(15), b(15)-98++, b(15)-98, b(15)-196++, b(15)-196, b(16)-98++, b(16)++, b(16)-196++

**Matched y ions:** y(3), y(4), y(5), y(6), y(7), y(7)++, y(8)++, y(8), y(9), y(10), y(11), y(11)-98, y(11)++, y(12), y(12)-98++, y(12)-98, y(13)++, y(13), y(13)-98++, y(13)-98, y(14)-98, y(14), y(14)-196++, y(14)++, y(15), y(15)-98++, y(15)-98, y(15)-196++, y(15)++, y(15)-196, y(16)++

**Precursor origin neutral loss:** +

## Peptide No.479

**KEESESEDDMGFGLFD**

**Confirmed sites:** @S:7

**Ambiguous sites:**

MS/MS Fragmentation of **KEESESEDDMGFGLFD**

Found in **RLA1\_MOUSE**, 60S acidic ribosomal protein P1 OS=Mus musculus GN=Rplp1 PE=1 SV=1

Match to Query 6934: 2098.798506 from(1050.406529,2+)

Title: Elution from: 65.444 to 65.444 scan no 6500 cid35.00 polarity:+:MA10:m1s



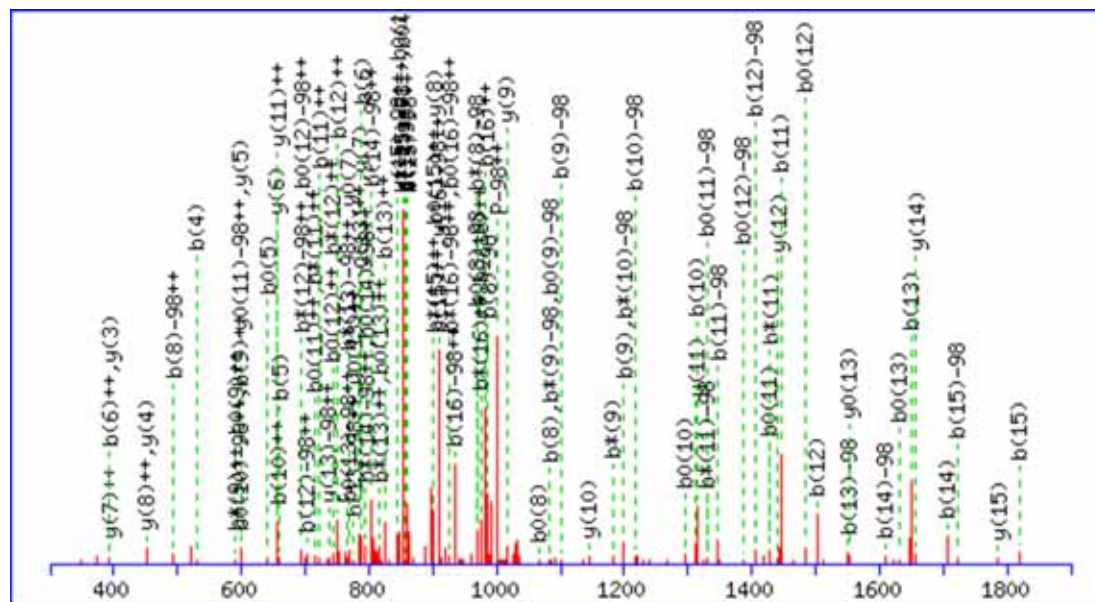

**Monoisotopic mass of neutral peptide Mr(calc):** 2098.7966

**Fixed modifications:** Carbamidomethyl (C) (apply to specified residues or termini only)

**Variable modifications:**

**N-term :** Dimethyl (N-term)

**K1 :** Dimethyl (K)

**S7 :** Phospho (ST), with neutral losses 0.0000(shown in table), 97.9769

**Ions Score:** 56 **Expect:** 5.5e-005

**Matched b ions:** b(4), b(5), b(6)++, b(6), b(7)-98, b(8)-98++, b(8), b(8)-98, b(9), b(9)++, b(9)-98, b(10), b(10)-98, b(10)++, b(11), b(11)-98, b(11)++, b(12), b(12)++, b(12)-98++, b(12)-98, b(13)-98, b(13), b(13)++, b(13)-98++, b(14)-98++, b(14)++, b(14)-98, b(14), b(15), b(15)++, b(15)-98++, b(15)-98, b(16)++, b(16)-98++

**Matched y ions:** y(3), y(4), y(5), y(6), y(7)++, y(7), y(8)++, y(8), y(9), y(10), y(11), y(11)++, y(12), y(13)++, y(13)-98++, y(14), y(15), y(15)-98++, y(16)-98++

**Precursor origin neutral loss:** +

## Peptide No.480

**KEESESEDDMGFGLFD**

**Confirmed sites:** @S:4,@S:7

**Ambiguous sites:**

MS/MS Fragmentation of **KEESESEDDMGFGLFD**

Found in **RLA1\_MOUSE**, 60S acidic ribosomal protein P1 OS=Mus musculus GN=Rplp1 PE=1 SV=1

Match to Query 5552: 2150.732580 from(1076.373566,2+)

Title: Elution from: 74.190 to 74.190 scan no 6840 cid35.00 polarity:+:MA10:m1s

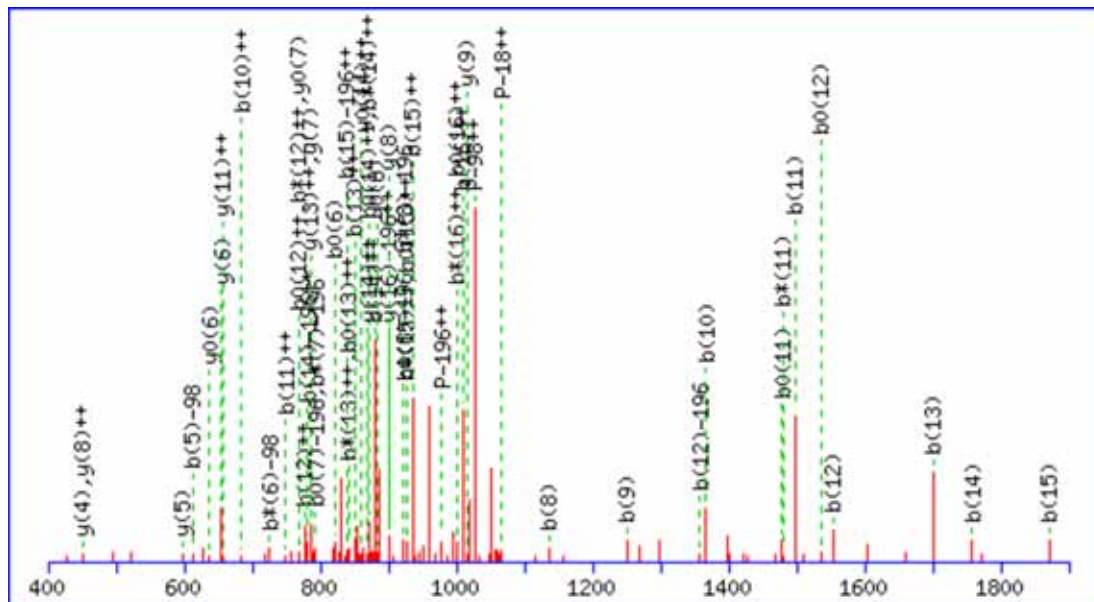

**Monoisotopic mass of neutral peptide Mr(calc):** 2150.7316

**Fixed modifications:** Carbamidomethyl (C) (apply to specified residues or termini only)

**Variable modifications:**

**K1 :** Dimethyl (K)

**S4 :** Phospho (ST), with neutral losses 0.0000(shown in table), 97.9769

**S7 :** Phospho (ST), with neutral losses 0.0000(shown in table), 97.9769

**Ions Score:** 55 **Expect:** 2.9e-005

**Matched b ions:** b(5)-98, b(8), b(9), b(10), b(10)-98, b(10)++, b(11), b(11)-98, b(11)++, b(12), b(12)++, b(12)-196, b(13), b(13)-98, b(13)++, b(14)++, b(14), b(14)-98, b(14)-98++, b(14)-98, b(14)-196, b(14)++, b(15), b(15)-98, b(15)++, b(15)-98, b(15)-196, b(16)-98, b(16)++

**Matched y ions:** y(4), y(5), y(6), y(7), y(8)++, y(8), y(9), y(11)++, y(13)++, y(14)-98, y(14)++, y(16)-196

**Precursor origin neutral loss:** +

## Peptide No.481

**KEESESEDDMGFGLFD**

**Confirmed sites:** @S:4,@S:7

**Ambiguous sites:**

MS/MS Fragmentation of **KEESESEDDMGFGLFD**

Found in **RLA1\_MOUSE**, 60S acidic ribosomal protein P1 OS=Mus musculus GN=Rplp1 PE=1 SV=1

Match to Query 5755: 2206.822572 from(736.614800,3+)

Title: Elution from: 65.736 to 65.736 scan no 6191 cid35.00 polarity:+:MA10:m1s



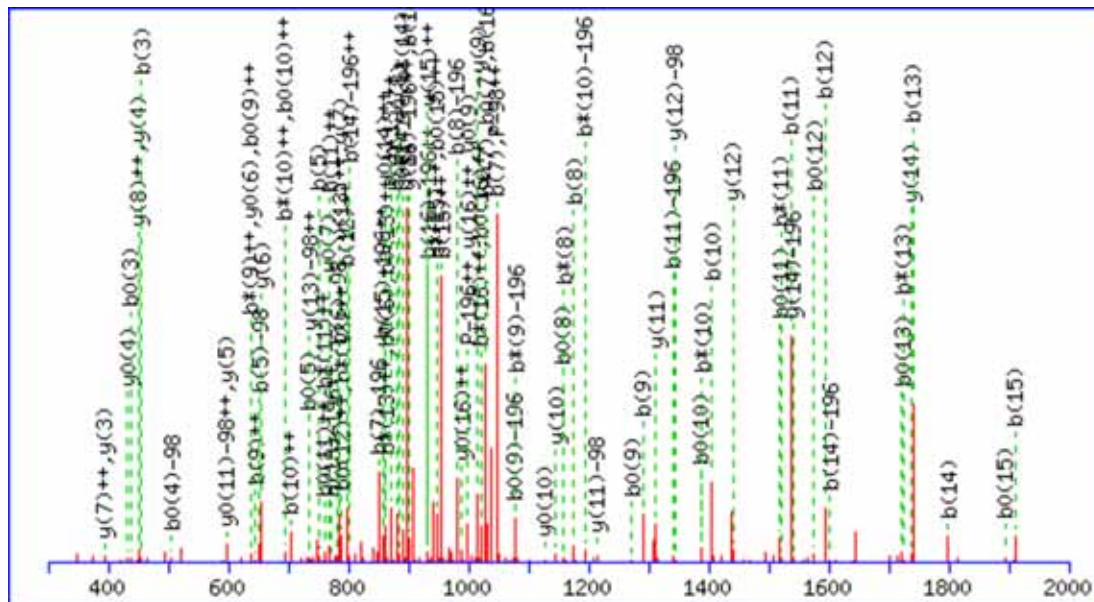

**Monoisotopic mass of neutral peptide Mr(calc):** 2190.8265

**Fixed modifications:** Carbamidomethyl (C) (apply to specified residues or termini only)

**Variable modifications:**

**N-term :** Dimethyl:2H(4)13C(2) (N-term)

**K1 :** Dimethyl:2H(4)13C(2) (K)

**S4 :** Phospho (ST), with neutral losses 0.0000(shown in table), 97.9769

**S7 :** Phospho (ST), with neutral losses 0.0000(shown in table), 97.9769

**Ions Score:** 77 **Expect:** 4.5e-007

**Matched b ions:** b(3), b(5)-98, b(5), b(6), b(6)-98, b(7), b(7)-196, b(7)-98, b(8), b(8)-98, b(8)-196, b(9), b(9)-98, b(9)++, b(10)-98++, b(10), b(10)++, b(10)-98, b(11), b(11)-98, b(11)-196, b(11)++, b(11)-98++, b(12)++, b(12), b(12)-98++, b(12)-98, b(13), b(13)-98, b(13)-98++, b(13)++, b(13)-196++, b(14)++, b(14), b(14)-98++, b(14)-98, b(14)-196, b(14)-196++, b(15)++, b(15), b(15)-98++, b(15)-98, b(15)-196++, b(16)++, b(16)-98++, b(16)-196++

**Matched y ions:** y(3), y(4), y(5), y(6), y(7), y(7)++, y(8)++, y(8), y(9), y(10), y(11), y(11)-98, y(12), y(12)-98, y(13)++, y(13)-98++, y(14), y(14)-196, y(15)-98++, y(15)++, y(16)-196++, y(16)++, y(16)-98++

**Precursor origin neutral loss:** +

## Peptide No.483

**KETESEAEDDNLDDLRL**

**Confirmed sites:** @T:3,@S:5

**Ambiguous sites:**

MS/MS Fragmentation of **KETESEAEDDNLDDLRL**

Found in **SRRM1\_MOUSE**, Serine/arginine repetitive matrix protein 1 OS=Mus musculus GN=Srrm1 PE=1 SV=1

Match to Query 6075: 2222.851686 from(1112.433119,2+)

Title: Elution from: 41.469 to 41.469 scan no 3702 cid35.00 polarity:+:MA10:m1s



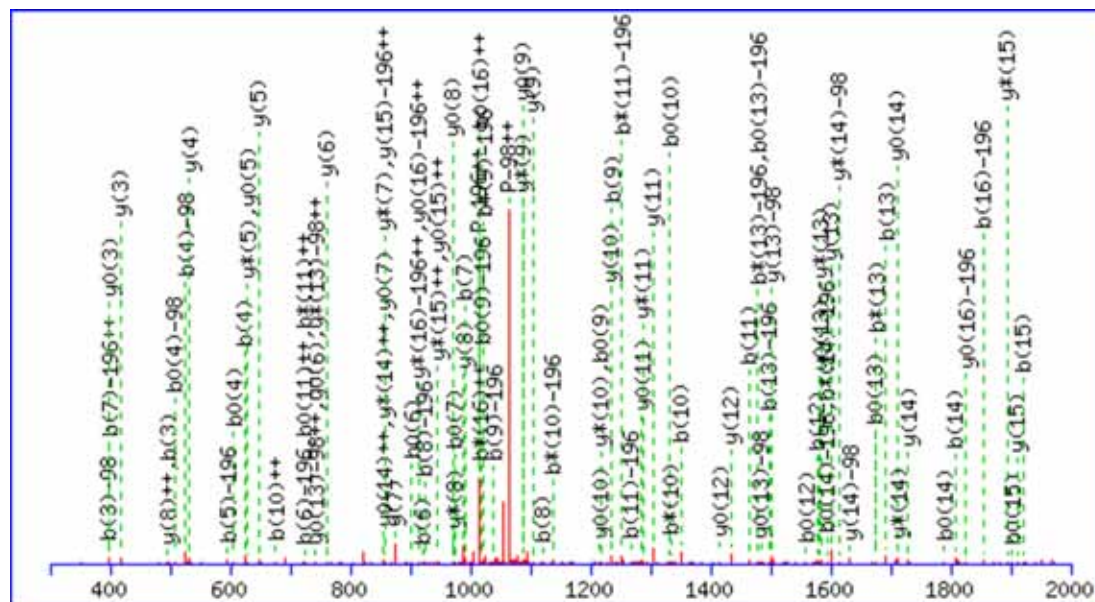

**Monoisotopic mass of neutral peptide Mr(calc):** 2222.8504

**Fixed modifications:** Carbamidomethyl (C) (apply to specified residues or termini only)

**Variable modifications:**

**N-term :** Dimethyl (N-term)

**K1 :** Dimethyl (K)

**T3 :** Phospho (ST), with neutral losses 97.9769(shown in table), 0.0000

**S5 :** Phospho (ST), with neutral losses 97.9769(shown in table), 0.0000

**Ions Score:** 66 **Expect:** 5.9e-006

**Matched b ions:** b(3)-98, b(3), b(4)-98, b(4), b(5)-98, b(5)-196, b(6)-98, b(6)-196, b(6), b(7)-196++, b(7)-98, b(7), b(8)-196, b(8)-98, b(8), b(9), b(9)-196, b(9)-98, b(10), b(10)++, b(10)-98, b(11), b(11)-98, b(11)-196, b(12), b(12)-98, b(13), b(13)-196, b(13)-98, b(14), b(14)-98, b(15), b(16)-98, b(16)-196

**Matched y ions:** y(3), y(4), y(5), y(6), y(7), y(8), y(8)++, y(9), y(10), y(11), y(12), y(13)-98, y(13), y(14)-98, y(14), y(15)-98, y(15)-196++, y(15), y(16)-98, y(16)-98++

**Precursor origin neutral loss:** +

## Peptide No.484

**KETESEAEDDNLDDLRL**

**Confirmed sites:** @T:3,@S:5

**Ambiguous sites:**

MS/MS Fragmentation of **KETESEAEDDNLDDLRL**

Found in **SRRM1\_MOUSE**, Serine/arginine repetitive matrix protein 1 OS=Mus musculus GN=Srm1 PE=1 SV=1

Match to Query 5736: 2234.917638 from(745.979822,3+)

Title: Elution from: 41.382 to 41.382 scan no 3630 cid35.00 polarity:+:MA10:m1s

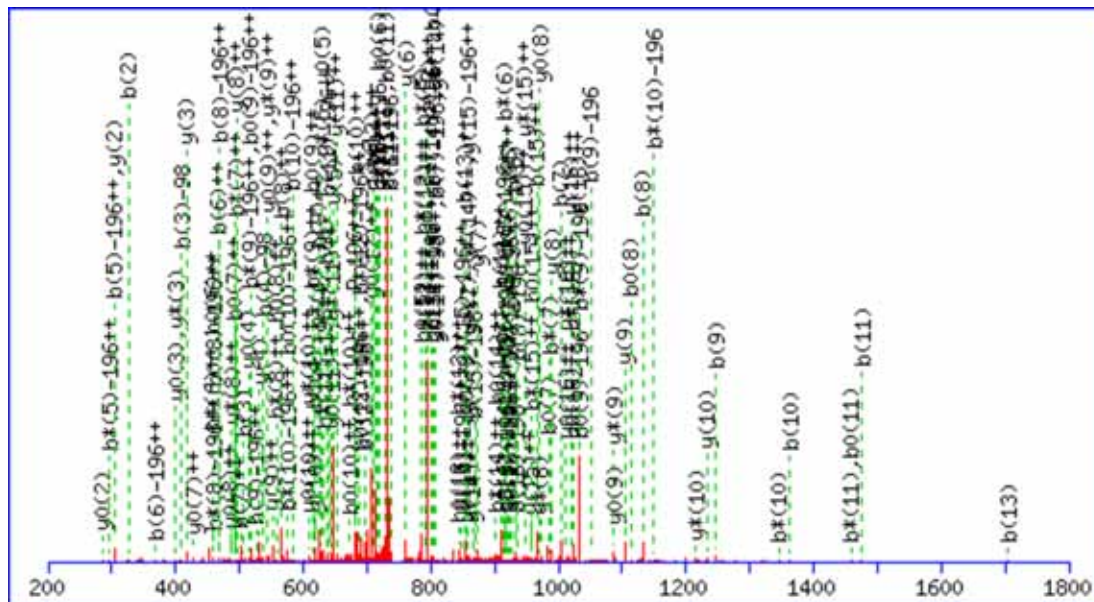

**Monoisotopic mass of neutral peptide Mr(calc):** 2234.9141

**Fixed modifications:** Carbamidomethyl (C) (apply to specified residues or termini only)

**Variable modifications:**

**N-term :** Dimethyl:2H(4)13C(2) (N-term)

**K1 :** Dimethyl:2H(4)13C(2) (K)

**T3 :** Phospho (ST), with neutral losses 0.0000(shown in table), 97.9769

**S5 :** Phospho (ST), with neutral losses 0.0000(shown in table), 97.9769

**Ions Score:** 62 **Expect:** 2.6e-005

**Matched b ions:** b(2), b(3)-98, b(3), b(4), b(4)-98, b(5)-196++, b(5)-98, b(5), b(6)-98++, b(6)++, b(6)-98, b(6), b(6)-196++, b(6)-196, b(7)-98++, b(7), b(7)++, b(7)-98, b(7)-196, b(8)++, b(8), b(8)-98++, b(8)-196++, b(8)-98, b(8)-196, b(9), b(9)++, b(9)-98++, b(9)-196++, b(9)-196, b(9)-98, b(10), b(10)++, b(10)-98++, b(10)-196++, b(11), b(11)-98++, b(11)-196++, b(11)++, b(12)++, b(12)-196++, b(13), b(13)++, b(13)-98++, b(14)++, b(14)-98++, b(15)++, b(15)-196++, b(15)-98++, b(16)++, b(16)-98++, b(16)-196++

**Matched y ions:** y(2), y(3), y(4), y(5), y(6), y(7), y(8), y(8)++, y(9), y(9)++, y(10), y(10)++, y(11)++, y(12)++, y(13)++, y(14)++, y(15)-98++, y(15)-196++, y(15)++, y(16)-196++, y(16)-98++, y(16)++

**Precursor origin neutral loss:** +

## Peptide No.485

**KGATPAEDDEDKDIDLFGSDEEEEDK**

**Confirmed sites:** @S:19

**Ambiguous sites:**

MS/MS Fragmentation of **KGATPAEDDEDKDIDLFGSDEEEEDK**

Found in **EF1D\_MOUSE**, Elongation factor 1-delta OS=Mus musculus GN=Eef1d PE=1 SV=3

Match to Query 8615: 3088.318317 from(1030.446715,3+)

Title: Elution from: 44.979 to 44.979 scan no 4300 cid35.00 polarity:+:MA10:m1s

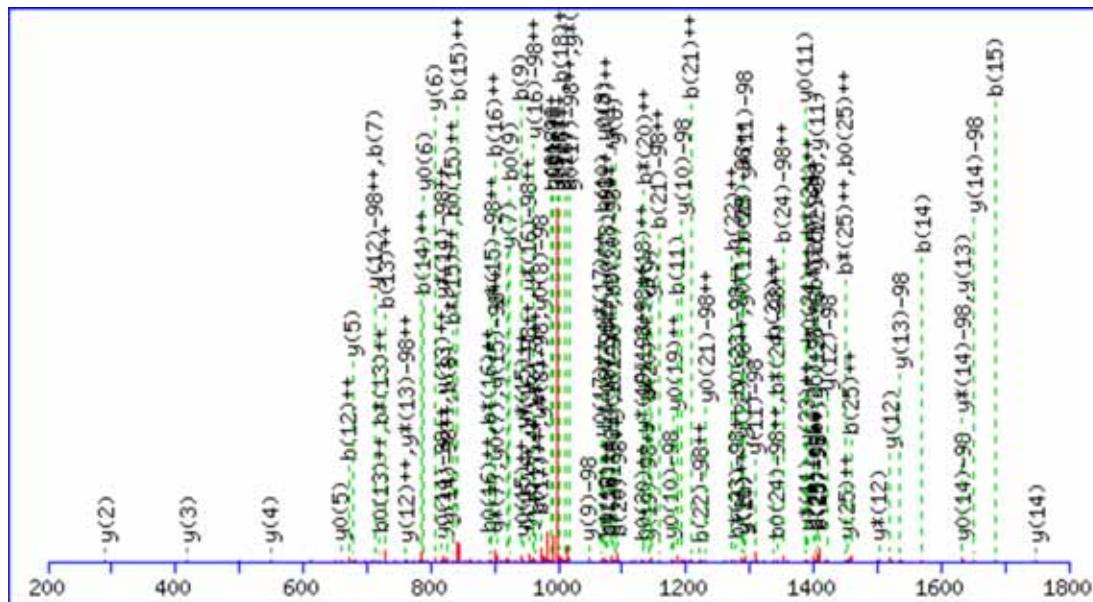

**Monoisotopic mass of neutral peptide Mr(calc):** 3088.3173

**Fixed modifications:** Carbamidomethyl (C) (apply to specified residues or termini only)

**Variable modifications:**

**N-term :** Dimethyl (N-term)

**K1 :** Dimethyl (K)

**K12 :** Dimethyl (K)

**S19 :** Phospho (ST), with neutral losses 97.9769(shown in table), 0.0000

**K26 :** Dimethyl (K)

**Ions Score:** 82 **Expect:** 5.6e-007

**Matched b ions:** b(7), b(8), b(9), b(10), b(11), b(12)++, b(13)++, b(14)++, b(14), b(15)++, b(15), b(16)++, b(17)++, b(18)++, b(19)++, b(20)-98++, b(20)++, b(21)++, b(21)-98++, b(22)-98++, b(22)++, b(23)-98++, b(23)++, b(24)-98++, b(24)++, b(25)-98++, b(25)++

**Matched y ions:** y(2), y(3), y(4), y(5), y(6), y(7), y(8)-98, y(8), y(9), y(9)-98, y(10)-98, y(10), y(11)-98, y(11), y(12), y(12)-98++, y(12)-98, y(12)++, y(13), y(13)-98, y(13)++, y(14), y(14)-98, y(14)-98++, y(15)++, y(15)-98++, y(16)-98++, y(16)++, y(17)++, y(18)-98++, y(18)++, y(19)-98++, y(21)++, y(22)-98++, y(23)++, y(25)-98++, y(25)++

**Precursor origin neutral loss:** +

## Peptide No.486

**KGSAEGSSDEEGKLVDEPAK**

**Confirmed sites:** @S:3,@S:7

**Ambiguous sites:**

**MS/MS Fragmentation of KGSAEGSSDEEGKLVDEPAK**

Found in **HDGF\_MOUSE**, Hepatoma-derived growth factor OS=Mus musculus GN=Hdgf PE=1 SV=2

Match to Query 6163: 2417.103354 from(806.708394,3+)

Title: Elution from: 36.553 to 36.553 scan no 2981 cid35.00 polarity:+:MA10:m1s

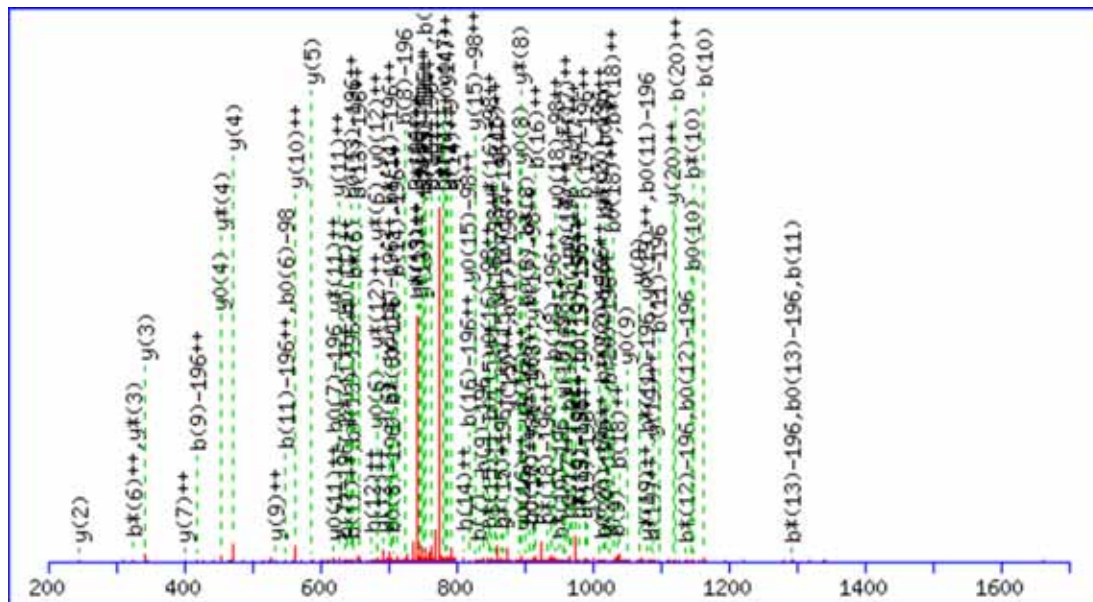

**Monoisotopic mass of neutral peptide Mr(calc):** 2417.1015

**Fixed modifications:** Carbamidomethyl (C) (apply to specified residues or termini only)

**Variable modifications:**

**N-term :** Dimethyl (N-term)

**K1 :** Dimethyl (K)

**S3 :** Phospho (ST), with neutral losses 0.0000(shown in table), 97.9769

**S7 :** Phospho (ST), with neutral losses 0.0000(shown in table), 97.9769

**K13 :** Dimethyl (K)

**K21 :** Dimethyl (K)

**Ions Score:** 33 **Expect:** 0.044

**Matched b ions:** b(7)-98, b(7)-196, b(7), b(8)-196, b(9), b(9)-196++, b(9)-196, b(9)-98, b(10), b(10)-98, b(10)-98++, b(10)-196, b(11), b(11)-98, b(11)-196, b(11)-196++, b(11)++, b(12)++, b(13)++, b(13)-196++, b(13)-98++, b(14)-98++, b(14)-196++, b(14)++, b(15)++, b(15)-196++, b(15)-98++, b(16)++, b(16)-196++, b(16)-98++, b(17)-98++, b(17)++, b(17)-196++, b(18)++, b(18)-98++, b(18)-196++, b(19)-98++, b(19)-196++, b(19)++, b(20)-98++, b(20)++, b(20)-196++

**Matched y ions:** y(2), y(3), y(4), y(5), y(6), y(7)++, y(8), y(9)++, y(9), y(10)++, y(11)++, y(12)++, y(13)++, y(14)++, y(15)++, y(15)-98++, y(16)-98++, y(18)-98++, y(19)-98++, y(19)-196++, y(19)++, y(20)-98++, y(20)-196++, y(20)++

**Precursor origin neutral loss:** +

## Peptide No.487

**KGSAEGSSDEEGKLVIDEPAK**

**Confirmed sites:** @S:7,@S:8

**Ambiguous sites:**

MS/MS Fragmentation of **KGSAEGSSDEEGKLVIDEPAK**

Found in **HDGF\_MOUSE**, Hepatoma-derived growth factor OS=Mus musculus GN=HdGF PE=1 SV=2

Match to Query 6409: 2417.103168 from(806.708332,3+)

Title: Elution from: 36.523 to 36.523 scan no 2996 cid35.00 polarity:+:MA10:m1s



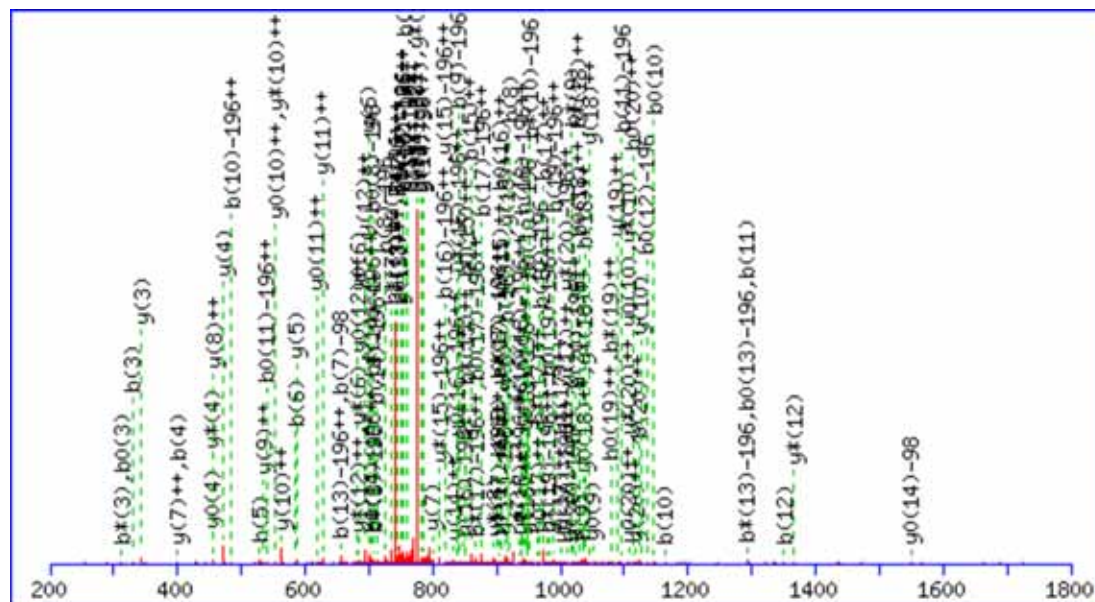

**Monoisotopic mass of neutral peptide Mr(calc):** 2417.1015

**Fixed modifications:** Carbamidomethyl (C) (apply to specified residues or termini only)

**Variable modifications:**

**N-term :** Dimethyl (N-term)

**K1 :** Dimethyl (K)

**S7 :** Phospho (ST), with neutral losses 97.9769(shown in table), 0.0000

**S8 :** Phospho (ST), with neutral losses 97.9769(shown in table), 0.0000

**K13 :** Dimethyl (K)

**K21 :** Dimethyl (K)

**Ions Score:** 36 **Expect:** 0.02

**Matched b ions:** b(3), b(4), b(5), b(6), b(7), b(7)-98, b(8)-196, b(8), b(9), b(9)-196, b(9)-98, b(10), b(10)-98, b(10)-196++, b(10)-196, b(11)-98, b(11), b(11)-196, b(12), b(12)-98++, b(13)++, b(13)-196++, b(13)-98++, b(14)-98++, b(14)-196++, b(15)++, b(15)-196++, b(15)-98++, b(16)++, b(16)-98++, b(16)-196++, b(17)-98++, b(17)++, b(17)-196++, b(18)++, b(18)-98++, b(18)-196++, b(19)-98++, b(19)-196++, b(20)++, b(20)-98++, b(20)-196++

**Matched y ions:** y(3), y(4), y(5), y(6), y(7)++, y(7), y(8), y(8)++, y(9)++, y(10)++, y(10), y(11)++, y(12)++, y(13)++, y(14)-98++, y(14)++, y(15)++, y(15)-98++, y(15)-196++, y(16)-98++, y(16)-196++, y(16)++, y(17)-196++, y(17)++, y(18)++, y(18)-196++, y(18)-98++, y(19)-98++, y(19)++, y(20)-196++, y(20)++

**Precursor origin neutral loss:** +

## Peptide No.488

**KHADSVAELGEQIDNLQR**

**Confirmed sites:** @S:5

**Ambiguous sites:**

MS/MS Fragmentation of **KHADSVAELGEQIDNLQR**

Found in **MYH7\_MOUSE**, Myosin-7 OS=Mus musculus GN=Myh7 PE=1 SV=1

Match to Query 6317: 2158.043337 from(720.355055,3+)

Title: Elution from: 45.075 to 45.075 scan no 4313 cid35.00 polarity:+:MA10:m1s

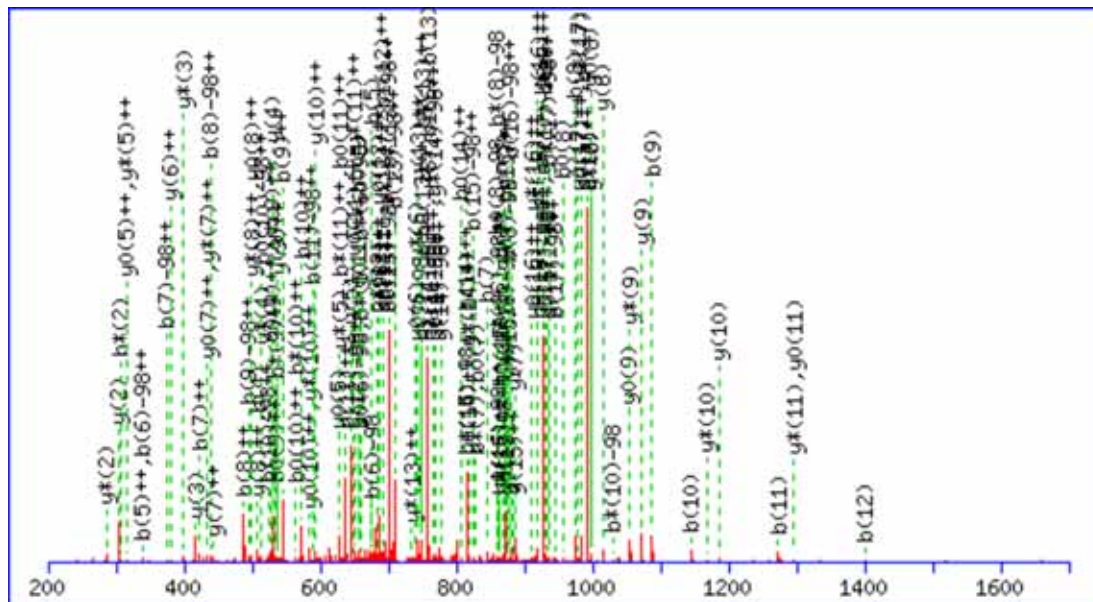

**Monoisotopic mass of neutral peptide Mr(calc):** 2158.0419

**Fixed modifications:** Carbamidomethyl (C) (apply to specified residues or termini only)

**Variable modifications:**

**N-term :** Dimethyl (N-term)

**K1 :** Dimethyl (K)

**S5 :** Phospho (ST), with neutral losses 0.0000(shown in table), 97.9769

**Ions Score:** 99 **Expect:** 9.5e-009

**Matched b ions:** b(4), b(5)++, b(5), b(6)-98++, b(6)-98, b(7)++, b(7), b(7)-98++, b(7)-98, b(8)++, b(8), b(8)-98++, b(8)-98, b(9)++, b(9), b(9)-98++, b(10), b(10)++, b(10)-98++, b(11)++, b(11), b(11)-98++, b(12)++, b(12), b(12)-98++, b(13)++, b(13)-98++, b(14)++, b(14)-98++, b(15)++, b(15)-98++, b(16)++, b(16)-98++, b(17)++, b(17)-98++

**Matched y ions:** y(2), y(3), y(4), y(5), y(6), y(6)++, y(7), y(7)++, y(8), y(8)++, y(9), y(9)++, y(10), y(10)++, y(11)++, y(12)++, y(13)++, y(14)-98++, y(15)++, y(16)++, y(16)-98++

**Precursor origin neutral loss:**

## Peptide No.489

**KHADSVAELGEQIDNLQR**

**Confirmed sites: @S:5**

**Ambiguous sites:**

**MS/MS Fragmentation of KHADSVAELGEQIDNLQR**

Found in **MYH1\_MOUSE**, Myosin-1 OS=Mus musculus GN=Myh1 PE=1 SV=1

Match to Query 5027: 2170.109607 from(724.377145,3+)

Title: Elution from: 44.890 to 44.890 scan no 3983 cid35.00 polarity:+:MA10:m1s

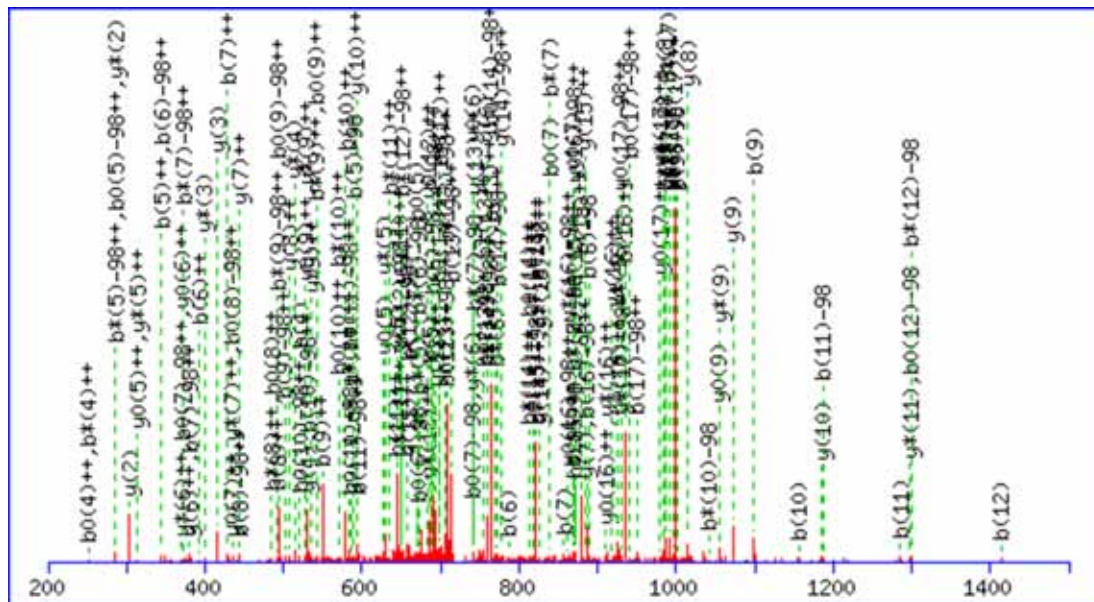

**Monoisotopic mass of neutral peptide Mr(calc):** 2170.1055

**Fixed modifications:** Carbamidomethyl (C) (apply to specified residues or termini only)

**Variable modifications:**

**N-term :** Dimethyl:2H(4)13C(2) (N-term)

**K1 :** Dimethyl:2H(4)13C(2) (K)

**S5 :** Phospho (ST), with neutral losses 0.0000(shown in table), 97.9769

**Ions Score:** 76 **Expect:** 1.6e-006

**Matched b ions:** b(4), b(5)++, b(5)-98, b(5), b(6)-98++, b(6)++, b(6)-98, b(6), b(7)-98++, b(7)-98, b(7)++, b(7), b(8)++, b(8), b(8)-98++, b(8)-98, b(9)++, b(9), b(9)-98++, b(9)-98, b(10)-98++, b(10)++, b(10), b(11), b(11)++, b(11)-98, b(11)-98++, b(12)++, b(12), b(12)-98++, b(13)++, b(13)-98++, b(14)++, b(14)-98++, b(15)++, b(16)++, b(16)-98++, b(17)++, b(17)-98++

**Matched y ions:** y(2), y(3), y(4), y(5), y(6), y(6)++, y(7)++, y(7), y(8), y(8)++, y(9), y(9)++, y(10), y(10)++, y(11)++, y(12)++, y(13)++, y(14)-98++, y(14)++, y(15)++, y(16)-98++, y(16)++, y(17)++

**Precursor origin neutral loss:**

## Peptide No.490

**KHLESDVLSK**

**Confirmed sites:** @S:5

**Ambiguous sites:**

**MS/MS Fragmentation of KHLESDVLSK**

Found in **AL2SB\_MOUSE**, Amyotrophic lateral sclerosis 2 chromosomal region candidate gene 12 protein homolog OS=Mus musculus GN=Als2cr12 PE=2 SV=1

Match to Query 2103: 1268.661968 from(635.338260,2+)

Title: Elution from: 62.005 to 62.005 scan no 6207 cid35.00 polarity:+:MA10

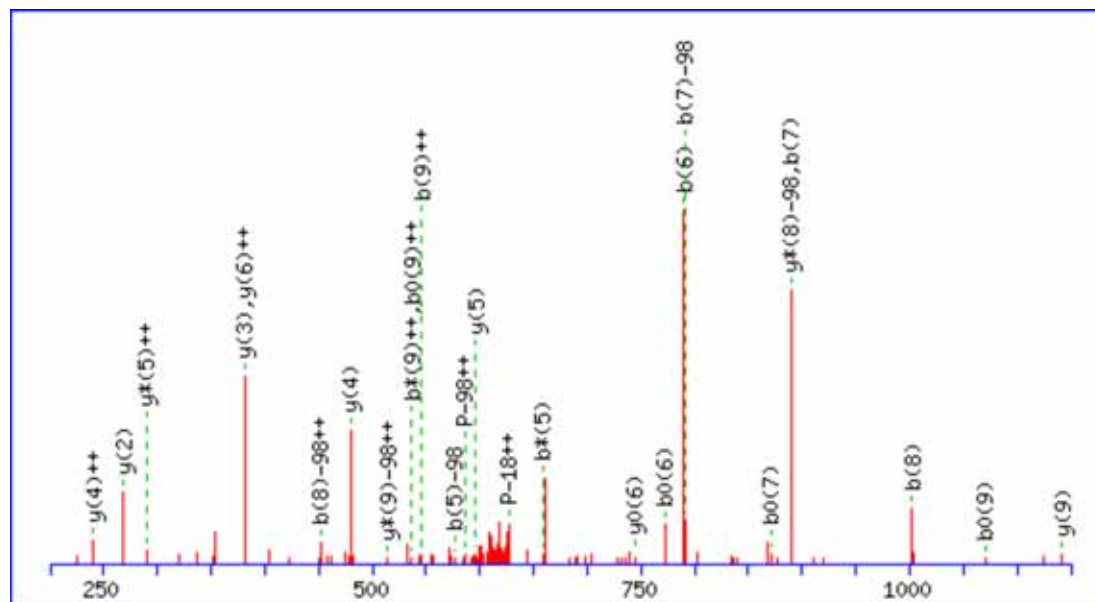

**Monoisotopic mass of neutral peptide Mr(calc):** 1268.6590

**Fixed modifications:** Carbamidomethyl (C) (apply to specified residues or termini only)

**Variable modifications:**

**S5 :** Phospho (ST), with neutral losses 0.0000(shown in table), 97.9769

**K10 :** Dimethyl:2H(4)13C(2) (K)

**Ions Score:** 32 **Expect:** 0.022

**Matched b ions:** b(5)-98, b(6), b(7), b(7)-98, b(8), b(8)-98++, b(9)++

**Matched y ions:** y(2), y(3), y(4), y(4)++, y(5), y(6)++, y(9)

**Precursor origin neutral loss:**

## Peptide No.491

**KIESFGSK**

**Confirmed sites:** @S:4

**Ambiguous sites:**

MS/MS Fragmentation of **KIESFGSK**

Found in **PPIF\_MOUSE**, Peptidyl-prolyl cis-trans isomerase F, mitochondrial OS=Mus musculus

GN=Ppif PE=2 SV=1

Match to Query 553: 1036.543228 from(519.278890,2+)

Title: Elution from: 29.167 to 29.167 scan no 2030 cid35.00 polarity:+:MA10:m1s



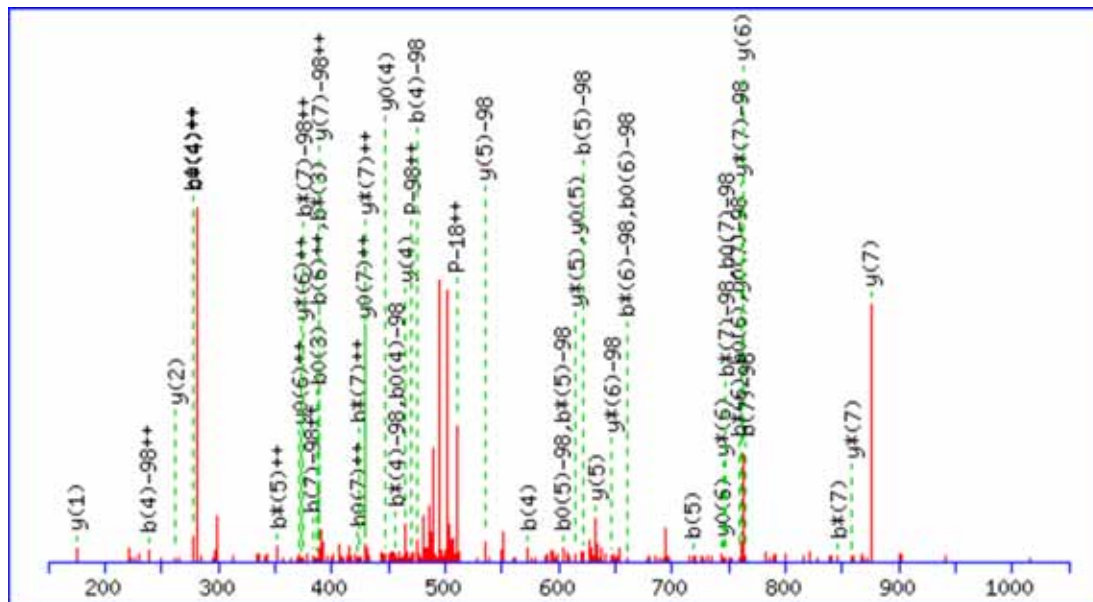

**Monoisotopic mass of neutral peptide Mr(calc):** 1036.5418

**Fixed modifications:** Carbamidomethyl (C) (apply to specified residues or termini only)

**Variable modifications:**

**K1 :** Dimethyl:2H(4)13C(2) (K)

**S4 :** Phospho (ST), with neutral losses 0.0000(shown in table), 97.9769

**K8 :** Dimethyl (K)

**Ions Score:** 29 **Expect:** 0.042

**Matched b ions:** b(4)-98++, b(4)-98, b(4), b(5)-98, b(5), b(6)++, b(7)-98++, b(7)-98

**Matched y ions:** y(1), y(2), y(4), y(5), y(5)-98, y(6), y(7), y(7)-98++

**Precursor origin neutral loss:**

## Peptide No.492

**KLEKEEEEGISQESSEEEQ**

**Confirmed sites:** @S:14,@S:15

**Ambiguous sites:**

**MS/MS Fragmentation of KLEKEEEEGISQESSEEEQ**

Found in **HMGA1\_MOUSE**, High mobility group protein HMG-I/HMG-Y OS=Mus musculus GN=Hmga1 PE=1 SV=4

Match to Query 6302: 2480.014845 from(827.678891,3+)

Title: Elution from: 30.194 to 30.194 scan no 2133 cid35.00 polarity:+:MA10:m1s

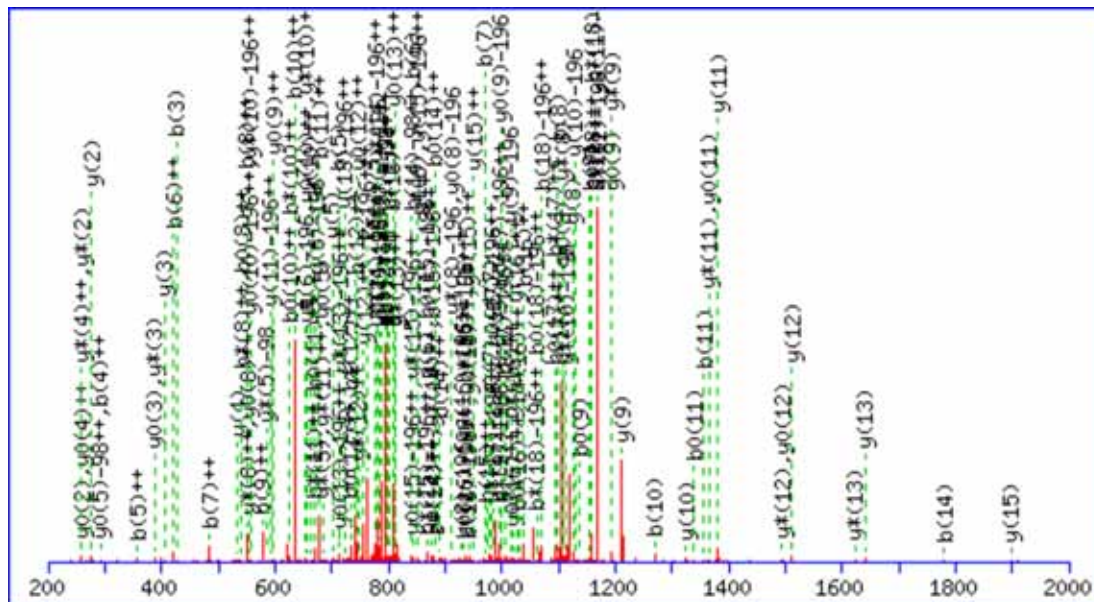

**Monoisotopic mass of neutral peptide Mr(calc):** 2480.0131

**Fixed modifications:** Carbamidomethyl (C) (apply to specified residues or termini only)

**Variable modifications:**

**N-term :** Dimethyl (N-term)

**K1 :** Dimethyl (K)

**K4 :** Dimethyl (K)

**S14 :** Phospho (ST), with neutral losses 97.9769(shown in table), 0.0000

**S15 :** Phospho (ST), with neutral losses 97.9769(shown in table), 0.0000

**Ions Score:** 82 **Expect:** 3e-007

**Matched b ions:** b(3), b(4)++, b(5)++, b(5), b(6)++, b(6), b(7)++, b(7), b(8)++, b(8), b(9)++, b(9), b(10)++, b(10), b(11)++, b(11), b(12)++, b(13)++, b(14), b(14)-98++, b(14)++, b(15)-196++, b(15)-98++, b(15)++, b(16)-98++, b(16)++, b(16)-196++, b(17)++, b(17)-98++, b(17)-196++, b(18)++, b(18)-98++, b(18)-196++

**Matched y ions:** y(2), y(3), y(4), y(5), y(6), y(6)-196, y(6)-98, y(7), y(7)-98, y(7)-196, y(8), y(8)-196, y(8)-98, y(9), y(9)-98, y(9)-98++, y(9)-196, y(10), y(10)-98++, y(10)++, y(10)-196, y(11), y(11)-98, y(11)-196++, y(12), y(12)++, y(12)-98++, y(13), y(13)-196++, y(13)-98++, y(14)-196++, y(15), y(15)-196++, y(15)++, y(16)-98++, y(16)-196++, y(16)++, y(18)-98++

**Precursor origin neutral loss:** +

## Peptide No.493

**KLEKEEEEGISQESSEEEQ**

**Confirmed sites:** @S:14,@S:15

**Ambiguous sites:**

MS/MS Fragmentation of **KLEKEEEEGISQESSEEEQ**

Found in **HMG1\_MOUSE**, High mobility group protein HMG-I/HMG-Y OS=Mus musculus GN=Hmga1 PE=1 SV=4

Match to Query 6587: 2498.109249 from(833.710359,3+)

Title: Elution from: 30.290 to 30.290 scan no 2144 cid35.00 polarity:+:MA10:m1s

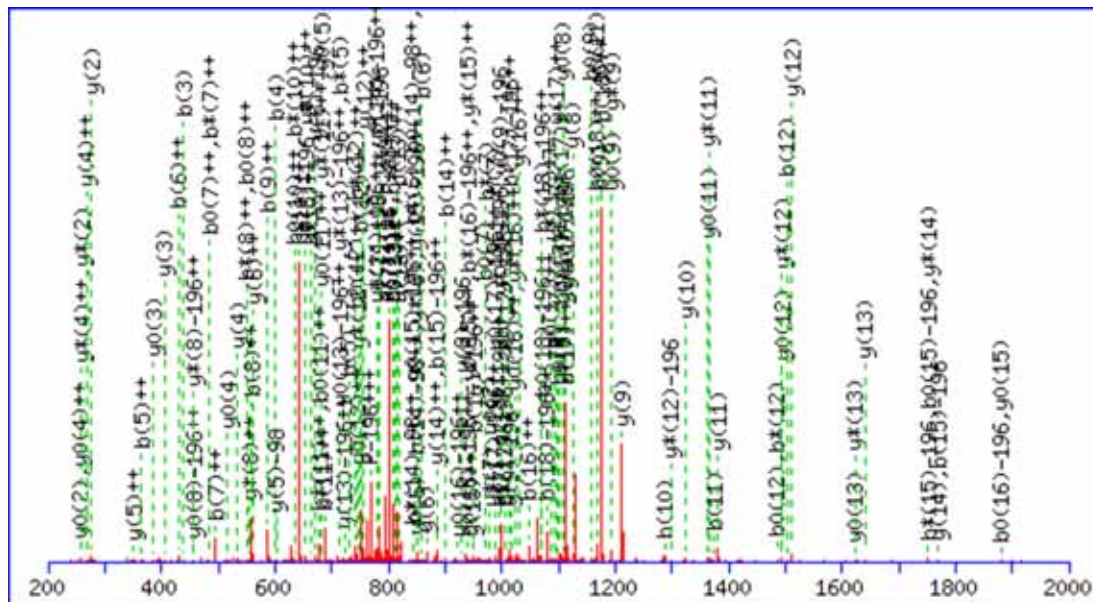

**Monoisotopic mass of neutral peptide Mr(calc):** 2498.1086

**Fixed modifications:** Carbamidomethyl (C) (apply to specified residues or termini only)

**Variable modifications:**

**N-term :** Dimethyl:2H(4)13C(2) (N-term)

**K1 :** Dimethyl:2H(4)13C(2) (K)

**K4 :** Dimethyl:2H(4)13C(2) (K)

**S14 :** Phospho (ST), with neutral losses 97.9769(shown in table), 0.0000

**S15 :** Phospho (ST), with neutral losses 97.9769(shown in table), 0.0000

**Ions Score:** 63 **Expect:** 3.7e-005

**Matched b ions:** b(3), b(4), b(5)++, b(5), b(6)++, b(6), b(7)++, b(7), b(8)++, b(9)++, b(9), b(10)++, b(10), b(11)++, b(11), b(12)++, b(12), b(13)++, b(14)-98++, b(14)++, b(15)-196++, b(15)-196, b(15)-98++, b(16)-98++, b(16)++, b(16)-196++, b(17)++, b(17)-196++, b(17)-98++, b(18)++, b(18)-98++, b(18)-196++

**Matched y ions:** y(2), y(3), y(4), y(4)++, y(5)++, y(5)-98, y(6), y(6)-196, y(6)-98, y(7)-196, y(7), y(7)-98, y(8)-98, y(8)++, y(8)-196, y(8), y(9), y(9)-98, y(9)-196, y(9)-98++, y(10), y(10)-98++, y(10)++, y(11)-98, y(11), y(11)-98++, y(12), y(12)++, y(13), y(13)-196++, y(13)-98++, y(13)++, y(14)++, y(14), y(15)-196++, y(15)-98++, y(15)++, y(16)-98++, y(16)++, y(17)-196++, y(17)++, y(18)-98++

**Precursor origin neutral loss:** +

## Peptide No.494

**KLSETVEETEGNSFK**

**Confirmed sites:** @S:3

**Ambiguous sites:**

MS/MS Fragmentation of **KLSETVEETEGNSFK**

Found in **TITIN\_MOUSE**, Titin OS=Mus musculus GN=Ttn PE=1 SV=1

Match to Query 4074: 1860.877416 from(621.299748,3+)

Title: Elution from: 37.240 to 37.240 scan no 3100 cid35.00 polarity:+:MA10

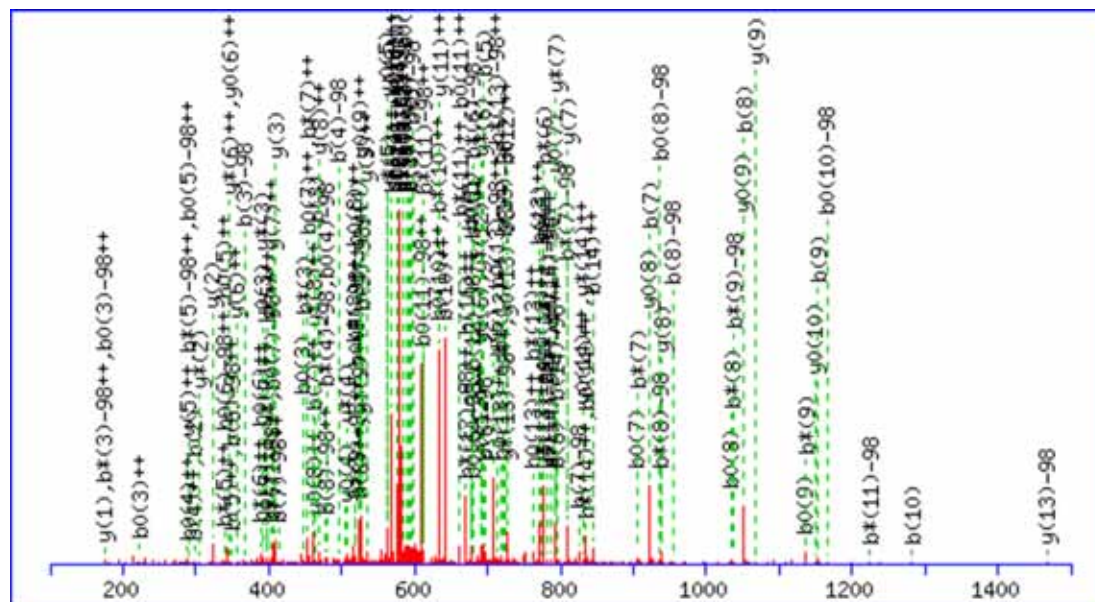

**Monoisotopic mass of neutral peptide Mr(calc):** 1860.8757

**Fixed modifications:** Carbamidomethyl (C) (apply to specified residues or termini only)

**Variable modifications:**

**N-term :** Dimethyl (N-term)

**K1 :** Dimethyl (K)

**S3 :** Phospho (ST), with neutral losses 0.0000(shown in table), 97.9769

**K15 :** Dimethyl (K)

**Ions Score:** 49 **Expect:** 0.00078

**Matched b ions:** b(2), b(3)-98, b(3), b(4)++, b(4)-98, b(4), b(5), b(5)++, b(5)-98, b(6), b(6)-98, b(6)-98++, b(6)++, b(7)++, b(7), b(7)-98, b(7)-98++, b(8), b(8)++, b(8)-98++, b(8)-98, b(9), b(9)++, b(9)-98++, b(10), b(10)++, b(10)-98++, b(11)++, b(12)++, b(12)-98++, b(13)++, b(13)-98++, b(14)++, b(14)-98++

**Matched y ions:** y(1), y(2), y(3), y(4), y(5), y(5)++, y(6), y(6)++, y(7), y(7)++, y(8), y(8)++, y(9), y(9)++, y(10)++, y(11)++, y(13)-98

**Precursor origin neutral loss:**

## Peptide No.495

**KLSETVEETEGNSFK**

**Confirmed sites:** @T:5

**Ambiguous sites:**

MS/MS Fragmentation of **KLSETVEETEGNSFK**

Found in **TITIN\_MOUSE**, Titin OS=Mus musculus GN=Ttn PE=1 SV=1

Match to Query 3854: 1860.876735 from(621.299521,3+)

Title: Elution from: 37.347 to 37.347 scan no 3113 cid35.00 polarity:+:MA10



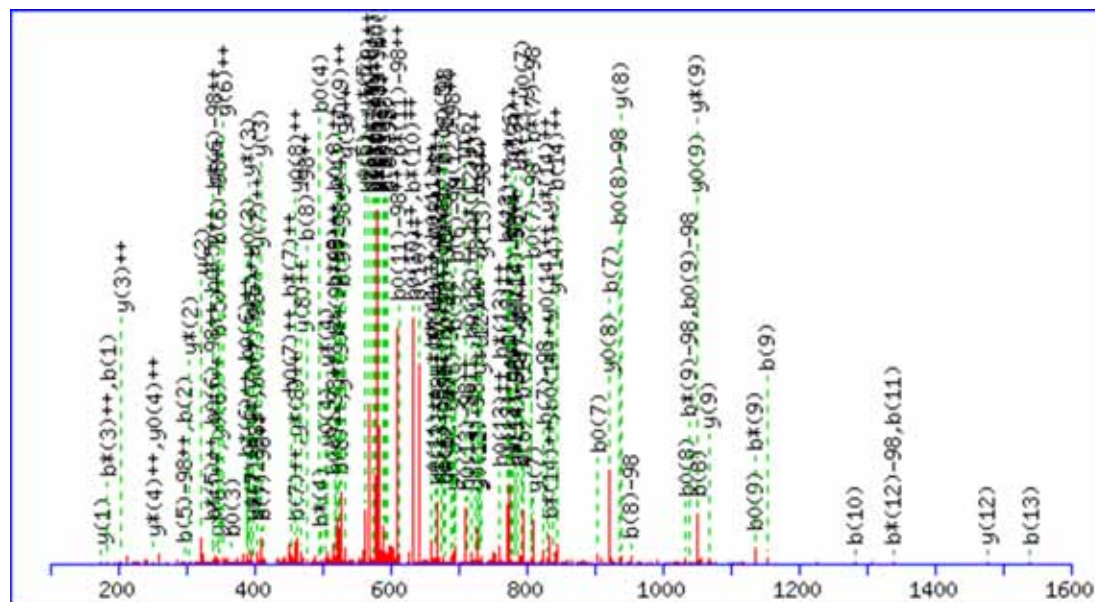

**Monoisotopic mass of neutral peptide Mr(calc): 1860.8757**

**Fixed modifications:** Carbamidomethyl (C) (apply to specified residues or termini only)

**Variable modifications:**

**N-term :** Dimethyl (N-term)

**K1 :** Dimethyl (K)

**T5 :** Phospho (ST), with neutral losses 0.0000(shown in table), 97.9769

**K15 :** Dimethyl (K)

**Ions Score:** 53 **Expect:** 0.00029

**Matched b ions:** b(1), b(2), b(5), b(5)-98++, b(5)++, b(5)-98, b(6), b(6)-98++, b(6)++, b(6)-98, b(7), b(7)++, b(7)-98, b(7)-98++, b(8), b(8)++, b(8)-98, b(8)-98++, b(9), b(9)++, b(9)-98++, b(10), b(10)++, b(10)-98++, b(11), b(11)++, b(12)++, b(12)-98++, b(13)++, b(13), b(14)++, b(14)-98++  
**Matched y ions:** y(1), y(2), y(3), y(3)++, y(4), y(5), y(6), y(6)++, y(7), y(7)++, y(8), y(8)++, y(9), y(9)++, y(10)++, y(11)++, y(12), y(12)-98++, y(13)-98++, y(13)++, y(14)++  
**Precursor origin neutral loss:**

## Peptide No.496

**KLSETVEETEGNSFK**

**Confirmed sites: @S:3**

**Ambiguous sites:**

MS/MS Fragmentation of **KLSETVEETEGNSFK**

Found in **TITIN\_MOUSE**, Titin OS=Mus musculus GN=Ttn PE=1 SV=1

Match to Query 4252: 1878.971820 from(940.493186,2+)

Title: Elution from: 37.213 to 37.213 scan no 3096 cid35.00 polarity:+:MA10

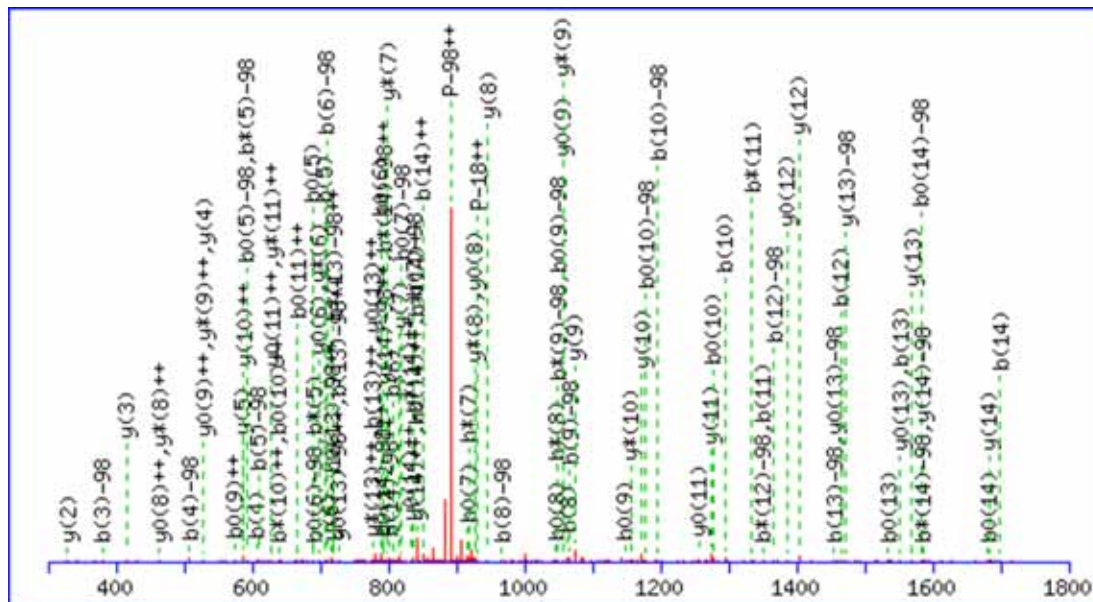

**Monoisotopic mass of neutral peptide Mr(calc):** 1878.9712

**Fixed modifications:** Carbamidomethyl (C) (apply to specified residues or termini only)

**Variable modifications:**

**N-term :** Dimethyl:2H(4)13C(2) (N-term)

**K1 :** Dimethyl:2H(4)13C(2) (K)

**S3 :** Phospho (ST), with neutral losses 97.9769(shown in table), 0.0000

**K15 :** Dimethyl:2H(4)13C(2) (K)

**Ions Score:** 71 **Expect:** 4.9e-006

**Matched b ions:** b(3)-98, b(4)-98, b(4), b(5), b(5)-98, b(6), b(6)-98, b(7)-98, b(8)-98, b(8), b(9)-98, b(10), b(10)-98, b(11), b(12), b(12)-98, b(13), b(13)-98, b(13)-98++, b(13)++, b(14)-98++, b(14), b(14)++

**Matched y ions:** y(2), y(3), y(4), y(5), y(6), y(7), y(8), y(9), y(10), y(10)++, y(11), y(12), y(13), y(13)-98, y(14)-98, y(14)++, y(14), y(14)-98++

**Precursor origin neutral loss:** +

## Peptide No.497

**KLSETVEETEGNSFK**

**Confirmed sites:** @T:5

**Ambiguous sites:**

**MS/MS Fragmentation of** KLSETVEETEGNSFK

Found in **TITIN\_MOUSE**, Titin OS=Mus musculus GN=Ttn PE=1 SV=1

Match to Query 4049: 1878.971586 from(627.331138,3+)

Title: Elution from: 37.352 to 37.352 scan no 3114 cid35.00 polarity:+:MA10

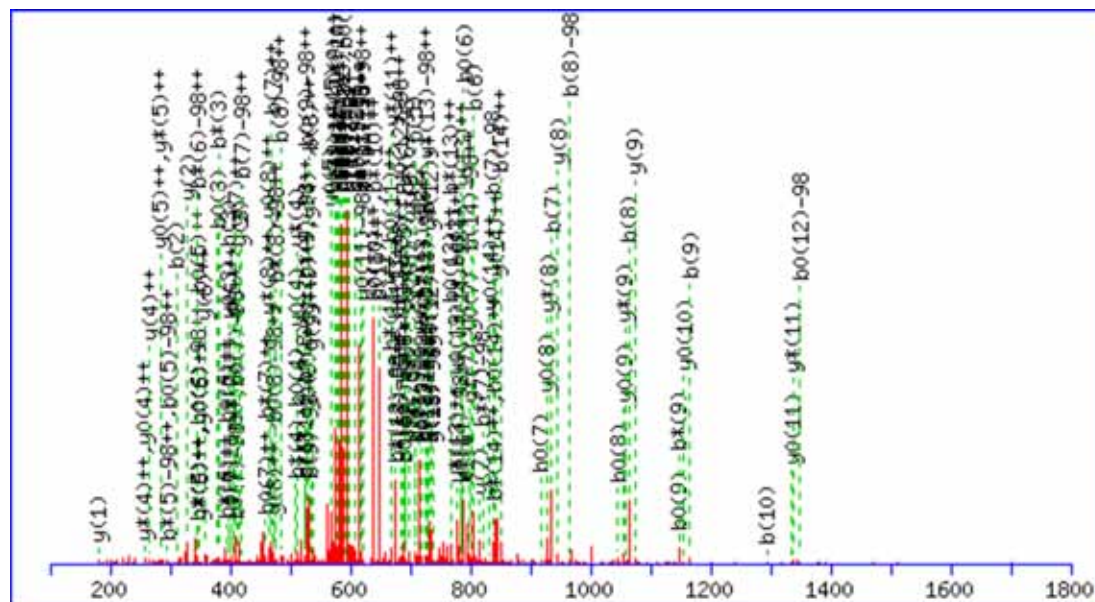

**Monoisotopic mass of neutral peptide Mr(calc):** 1878.9712

**Fixed modifications:** Carbamidomethyl (C) (apply to specified residues or termini only)

**Variable modifications:**

**N-term :** Dimethyl:2H(4)13C(2) (N-term)

**K1 :** Dimethyl:2H(4)13C(2) (K)

**T5 :** Phospho (ST), with neutral losses 0.0000(shown in table), 97.9769

**K15 :** Dimethyl:2H(4)13C(2) (K)

**Ions Score:** 33 **Expect:** 0.033

**Matched b ions:** b(2), b(3), b(4), b(5)-98, b(5), b(6), b(6)++, b(6)-98, b(7), b(7)++, b(7)-98, b(7)-98++, b(8), b(8)++, b(8)-98, b(8)-98++, b(9), b(9)++, b(9)-98++, b(10), b(10)++, b(10)-98++, b(11)++, b(12)++, b(12)-98++, b(13)++, b(13)-98++, b(14)++, b(14)-98++

**Matched y ions:** y(1), y(2), y(3), y(4), y(4)++, y(5), y(6), y(6)++, y(7)++, y(7), y(8), y(8)++, y(9), y(9)++, y(10)++, y(12)-98++, y(13)-98++, y(13)++, y(14)++

**Precursor origin neutral loss:** +

## Peptide No.498

**KLSVDNNTSATDYK**

**Confirmed sites:** @S:3

**Ambiguous sites:**

MS/MS Fragmentation of **KLSVDNNTSATDYK**

Found in **SVIL\_MOUSE**, Supervillin OS=Mus musculus GN=Svil PE=1 SV=1

Match to Query 3860: 1718.813558 from(860.414055,2+)

Title: Elution from: 30.489 to 30.489 scan no 2372 cid35.00 polarity:+:MA10:m1s

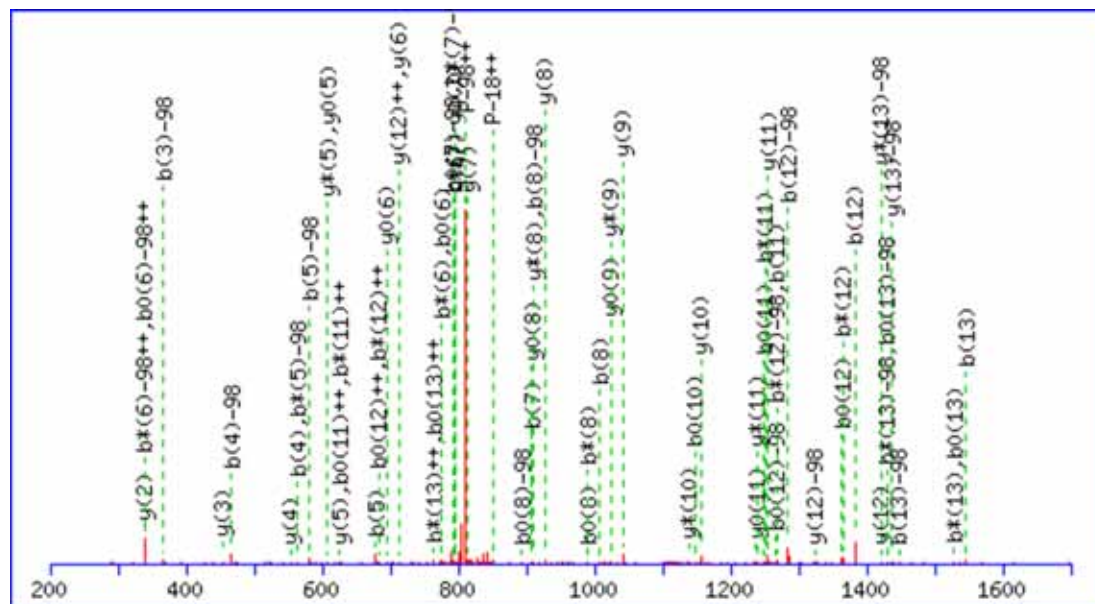

**Monoisotopic mass of neutral peptide Mr(calc):** 1718.8128

**Fixed modifications:** Carbamidomethyl (C) (apply to specified residues or termini only)

**Variable modifications:**

**N-term :** Dimethyl (N-term)

**K1 :** Dimethyl (K)

**S3 :** Phospho (ST), with neutral losses 97.9769(shown in table), 0.0000

**K14 :** Dimethyl (K)

**Ions Score:** 39 **Expect:** 0.0068

**Matched b ions:** b(3)-98, b(4)-98, b(4), b(5)-98, b(5), b(6), b(7), b(8), b(8)-98, b(11), b(12)-98, b(12), b(13), b(13)-98

**Matched y ions:** y(2), y(3), y(4), y(5), y(6), y(7), y(8), y(9), y(10), y(11), y(12)++, y(12), y(12)-98, y(13)-98

**Precursor origin neutral loss:** +

## Peptide No.499

**KMIEDRSR**

**Confirmed sites:** @S:7

**Ambiguous sites:**

MS/MS Fragmentation of **KMIEDRSR**

Found in **CSTF3\_MOUSE**, Cleavage stimulation factor subunit 3 OS=Mus musculus GN=Cstf3 PE=1 SV=1

Match to Query 735: 1129.497796 from(565.756174,2+)

Title: Elution from: 51.228 to 51.228 scan no 4674 cid35.00 polarity:+:MA10:m1s



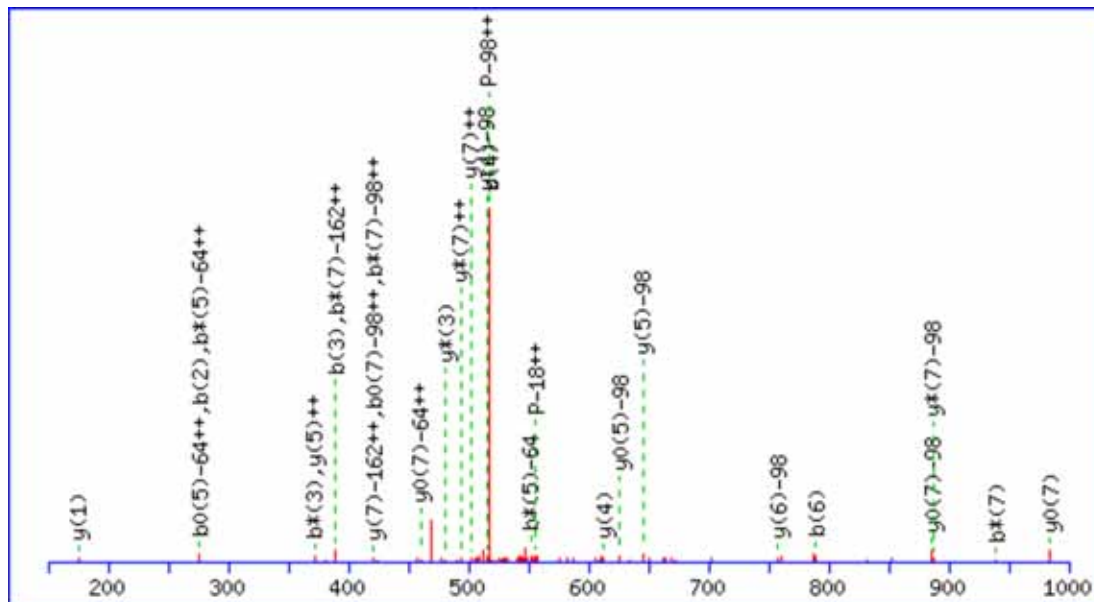

**Monoisotopic mass of neutral peptide Mr(calc):** 1129.4951

**Fixed modifications:** Carbamidomethyl (C) (apply to specified residues or termini only)

**Variable modifications:**

**M2 :** Oxidation (M), with neutral losses 0.0000(shown in table), 63.9983

**S7 :** Phospho (ST), with neutral losses 97.9769(shown in table), 0.0000

**Ions Score:** 25 **Expect:** 0.04

**Matched b ions:** b(2), b(3), b(4), b(6)

**Matched y ions:** y(1), y(4)-98, y(4), y(5)-98, y(5)++, y(6)-98, y(7)++

**Precursor origin neutral loss:** +

## Peptide No.500

**KREDEEEEEGSIVNGSTTEDEEQTR**

**Confirmed sites:** @S:11

**Ambiguous sites:**

MS/MS Fragmentation of **KREDEEEEEGSIVNGSTTEDEEQTR**

Found in **NEXN\_MOUSE**, Nexlin OS=Mus musculus GN=Nexn PE=1 SV=2

Match to Query 8599: 3031.281648 from(758.827688,4+)

Title: Elution from: 31.933 to 31.933 scan no 2570 cid35.00 polarity:+:MA10:m1s

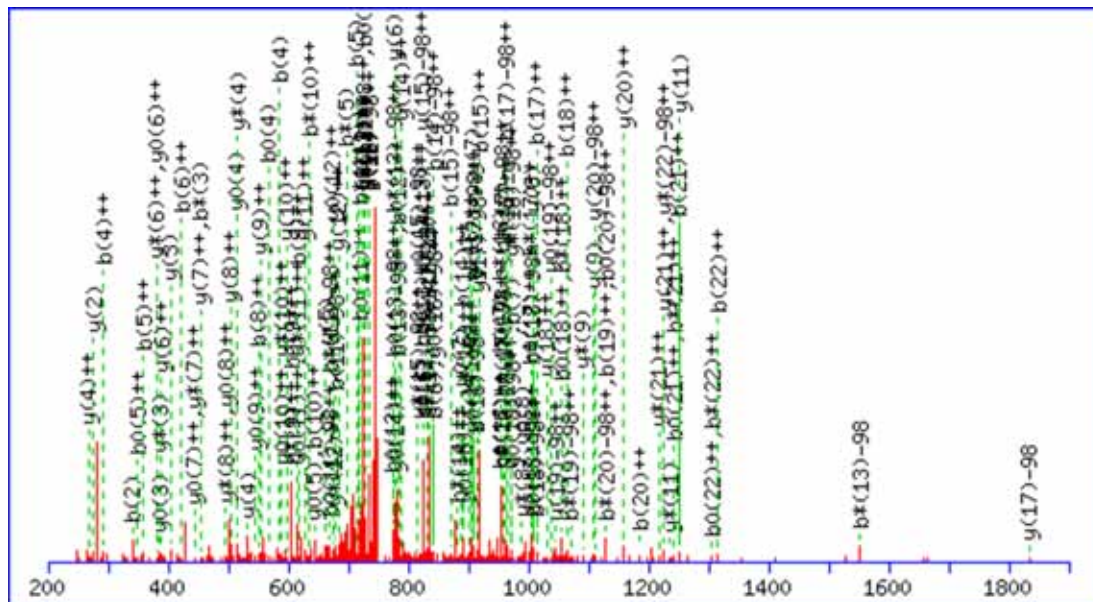

**Monoisotopic mass of neutral peptide Mr(calc): 3031.2778**

**Fixed modifications:** Carbamidomethyl (C) (apply to specified residues or termini only)

**Variable modifications:**

**N-term :** Dimethyl (N-term)

**K1 :** Dimethyl (K)

**S11 :** Phospho (ST), with neutral losses 0.0000(shown in table), 97.9769

**Ions Score:** 43 **Expect:** 0.0036

**Matched b ions:** b(2), b(4)++, b(4), b(5)++, b(5), b(6)++, b(6), b(7), b(8)++, b(9)++, b(10)++, b(11)-98++, b(11)++, b(12)++, b(12)-98++, b(13)++, b(13)-98++, b(14)++, b(14)-98++, b(15)++, b(15)-98++, b(16)++, b(16)-98++, b(17)-98++, b(17)++, b(18)++, b(18)-98++, b(19)++, b(20)++, b(21)++, b(22)++

**Matched y ions:** y(2), y(3), y(4), y(4)++, y(5), y(6), y(6)++, y(7), y(7)++, y(8)++, y(8), y(9), y(9)++, y(10)++, y(11), y(11)++, y(12)++, y(13)++, y(14)++, y(15)-98++, y(16)++, y(17)-98, y(17)-98++, y(18)++, y(19)-98++, y(20)++, y(20)-98++, y(21)++

**Precursor origin neutral loss:** +

## Peptide No.501

**KREDEEEEEGSIVNGSTTEDEEQTR**

**Confirmed sites:** @S:11,@T:17

**Ambiguous sites:**

MS/MS Fragmentation of **KREDEEEEEGSIVNGSTTEDEEQTR**

Found in **NEXN\_MOUSE**, Nexlin OS=Mus musculus GN=Nexn PE=1 SV=2

Match to Query 8627: 3111.245820 from(1038.089216,3+)

Title: Elution from: 31.776 to 31.776 scan no 2549 cid35.00 polarity:+:MA10:m1s

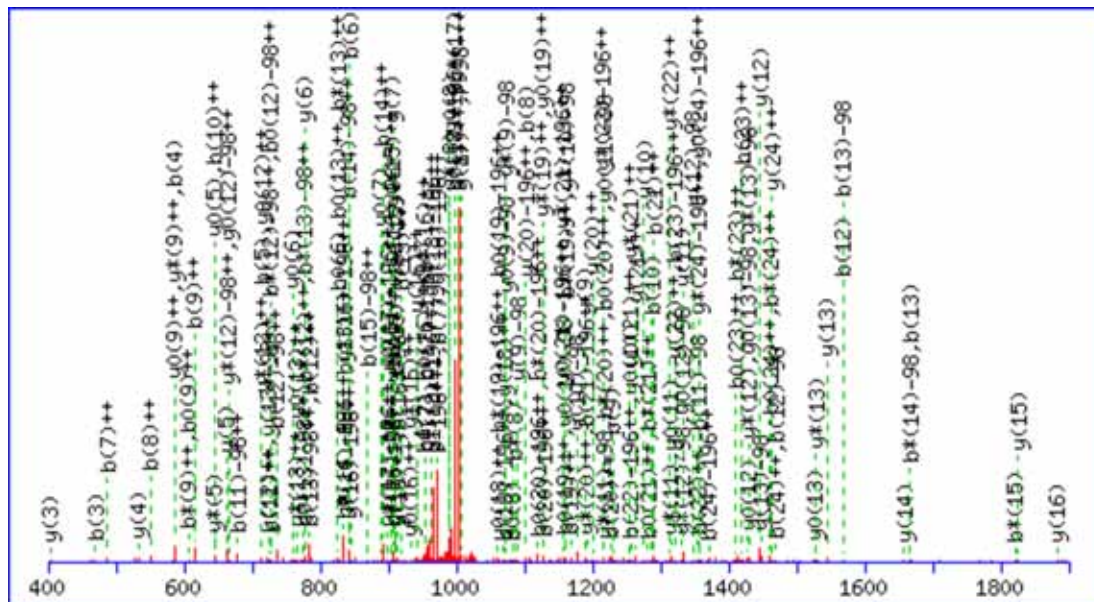

**Monoisotopic mass of neutral peptide Mr(calc):** 3111.2442

**Fixed modifications:** Carbamidomethyl (C) (apply to specified residues or termini only)

**Variable modifications:**

**N-term :** Dimethyl (N-term)

**K1 :** Dimethyl (K)

**S11 :** Phospho (ST), with neutral losses 97.9769(shown in table), 0.0000

**T17 :** Phospho (ST), with neutral losses 97.9769(shown in table), 0.0000

**Ions Score:** 64 **Expect:** 2.1e-005

**Matched b ions:** b(3), b(4), b(5), b(6), b(7)++, b(7), b(8)++, b(8), b(9)++, b(9), b(10)++, b(10), b(11)-98++, b(11)++, b(11)-98, b(12)++, b(12)-98++, b(12), b(12)-98, b(13)-98++, b(13)++, b(13), b(13)-98, b(14)++, b(14)-98++, b(15)-98++, b(15)++, b(16)-98++, b(17)-196++, b(17)-98++, b(18)-196++, b(18)-98++, b(19)-98++, b(19)++, b(19)-196++, b(20)-98++, b(20)-196++, b(20)++, b(21)++, b(21)-196++, b(22)-98++, b(22)-196++, b(22)++, b(23)-196++, b(23)++, b(23)-98++, b(24)-196++, b(24)-98++, b(24)++

**Matched y ions:** y(3), y(4), y(5), y(6), y(7), y(8), y(9), y(9)-98, y(10)-98, y(10), y(11), y(12), y(12)-98, y(12)++, y(13), y(13)-98, y(13)-98++, y(14), y(15), y(15)++, y(16), y(16)-98, y(16)-196++, y(16)-98++, y(16)++, y(17)++, y(17)-196++, y(17)-98++, y(18)-196++, y(18)-98++, y(18)++, y(19)-98++, y(20)-98++, y(20)-196++, y(20)++, y(21)++, y(21)-98++, y(22)++, y(24)-98++, y(24)++

**Precursor origin neutral loss:** +

## Peptide No.502

**KRHSGDFGADAQGAMSK**

**Confirmed sites:** @S:4

**Ambiguous sites:**

**MS/MS Fragmentation of KRHSGDFGADAQGAMSK**

Found in **MYG\_MOUSE**, Myoglobin OS=Mus musculus GN=Mb PE=1 SV=3

Match to Query 4744: 1941.878044 from(486.476787,4+)

Title: Elution from: 20.610 to 20.610 scan no 997 cid35.00 polarity:+:MA10

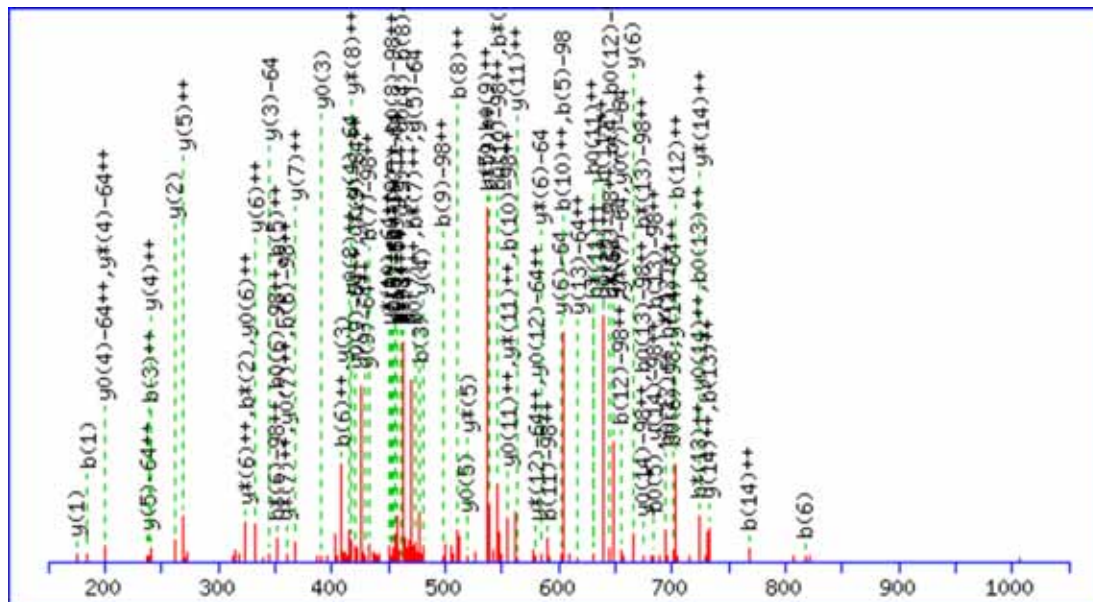

**Monoisotopic mass of neutral peptide Mr(calc):** 1941.8768

**Fixed modifications:** Carbamidomethyl (C) (apply to specified residues or termini only)

**Variable modifications:**

**N-term :** Dimethyl (N-term)

**K1 :** Dimethyl (K)

**S4 :** Phospho (ST), with neutral losses 0.0000(shown in table), 97.9769

**M15 :** Oxidation (M), with neutral losses 0.0000(shown in table), 63.9983

**K17 :** Dimethyl (K)

**Ions Score:** 70 **Expect:** 4.9e-006

**Matched b ions:** b(1), b(3)++, b(3), b(4)-98, b(4), b(5)-98, b(5)++, b(6), b(6)++, b(6)-98++, b(7)-98++, b(8)-98++, b(8)++, b(9)++, b(9)-98++, b(10)++, b(10)-98++, b(11)++, b(11)-98++, b(12)++, b(12)-98++, b(13)++, b(13)-98++, b(14)++

**Matched y ions:** y(1), y(2), y(3), y(4)++, y(4), y(5)++, y(5), y(6)++, y(6), y(7)++, y(9)++, y(11)++, y(14)++, y(14)-98++

**Precursor origin neutral loss:**

## Peptide No.503

**KRHSGDFGADAQGAMSK**

**Confirmed sites:** @S:4

**Ambiguous sites:**

**MS/MS Fragmentation of KRHSGDFGADAQGAMSK**

Found in **MYG\_MOUSE**, Myoglobin OS=Mus musculus GN=Mb PE=1 SV=3

Match to Query 4653: 1925.882008 from(482.477778,4+)

Title: Elution from: 25.642 to 25.642 scan no 1548 cid35.00 polarity:+:MA10



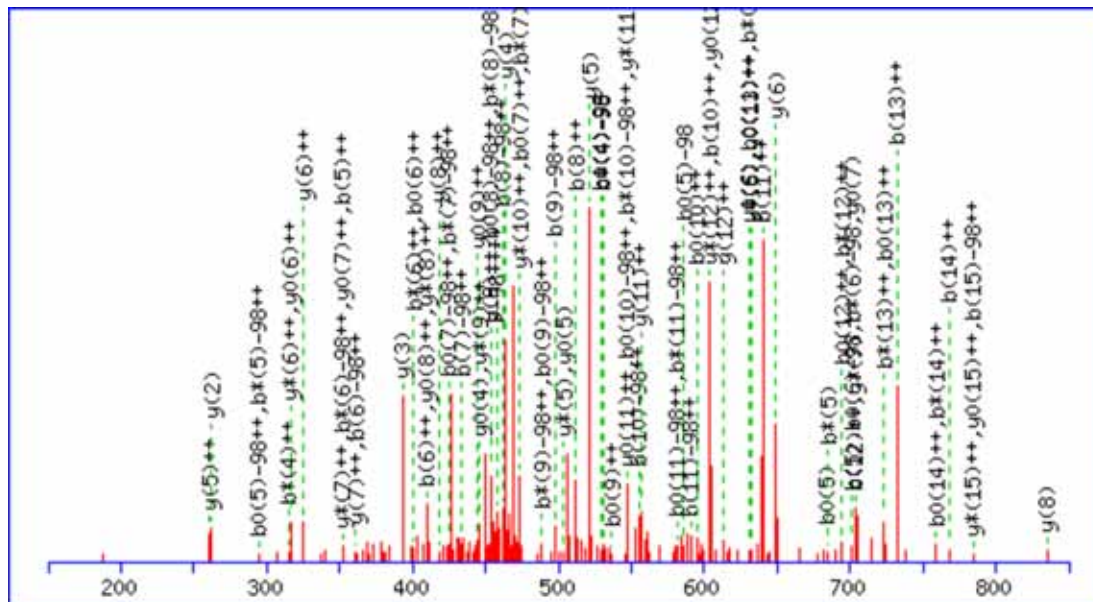

**Monoisotopic mass of neutral peptide Mr(calc):** 1925.8819

**Fixed modifications:** Carbamidomethyl (C) (apply to specified residues or termini only)

**Variable modifications:**

**N-term :** Dimethyl (N-term)

**K1 :** Dimethyl (K)

**S4 :** Phospho (ST), with neutral losses 0.0000(shown in table), 97.9769

**K17 :** Dimethyl (K)

**Ions Score:** 44 **Expect:** 0.0025

**Matched b ions:** b(4)-98, b(5)-98, b(5)++, b(5), b(6)++, b(6)-98, b(7)-98, b(8)++, b(8)-98, b(9)++, b(9)-98, b(10)++, b(10)-98, b(11)++, b(11)-98, b(12)++, b(13)++, b(14)++, b(15)-98

**Matched y ions:** y(2), y(3), y(4), y(5), y(5)++, y(6)++, y(6), y(7)++, y(8), y(8)++, y(9)++, y(11)++, y(12)++

**Precursor origin neutral loss:**

## Peptide No.504

**KRHSGDFGADAQGAMSK**

**Confirmed sites:** @S:4

**Ambiguous sites:**

MS/MS Fragmentation of **KRHSGDFGADAQGAMSK**

Found in **MYG\_MOUSE**, Myoglobin OS=Mus musculus GN=Mb PE=1 SV=3

Match to Query 4789: 1959.974232 from(654.332020,3+)

Title: Elution from: 20.677 to 20.677 scan no 984 cid35.00 polarity:+:MA10

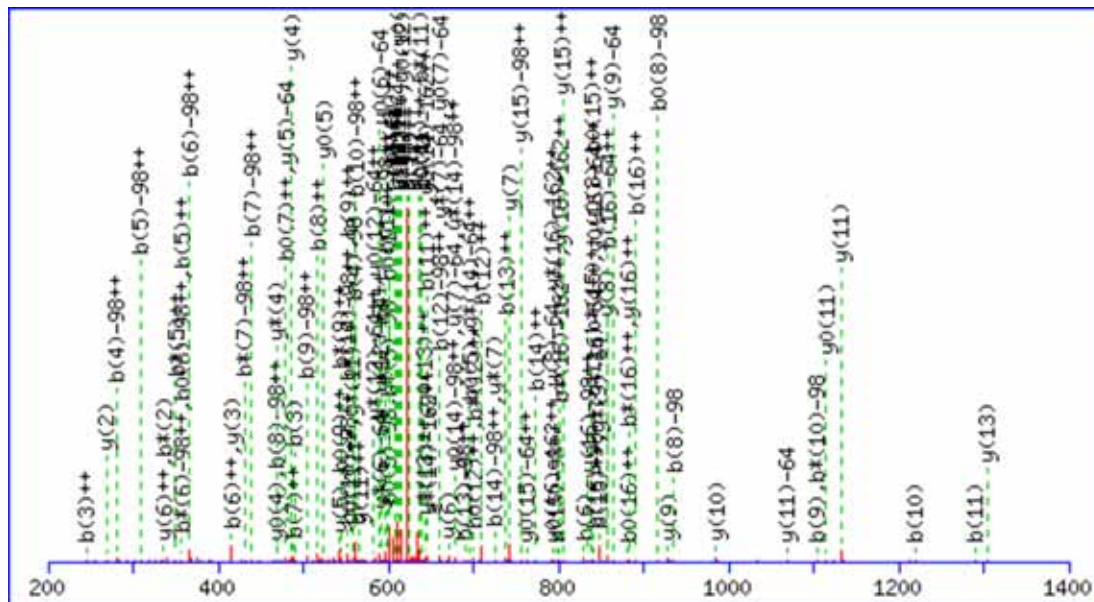

**Monoisotopic mass of neutral peptide Mr(calc):** 1959.9722

**Fixed modifications:** Carbamidomethyl (C) (apply to specified residues or termini only)

**Variable modifications:**

**N-term :** Dimethyl:2H(4)13C(2) (N-term)

**K1 :** Dimethyl:2H(4)13C(2) (K)

**S4 :** Phospho (ST), with neutral losses 0.0000(shown in table), 97.9769

**M15 :** Oxidation (M), with neutral losses 0.0000(shown in table), 63.9983

**K17 :** Dimethyl:2H(4)13C(2) (K)

**Ions Score:** 67 **Expect:** 1.4e-005

**Matched b ions:** b(3)++, b(3), b(4)-98++, b(4)-98, b(5)-98, b(5)-98++, b(5)++, b(6)++, b(6), b(6)-98++, b(7)++, b(7)-98++, b(8)++, b(8)-98, b(8)-98++, b(9)-98++, b(9), b(9)++, b(10), b(10)++, b(10)-98++, b(11), b(11)++, b(11)-98++, b(12)++, b(12)-98++, b(13)++, b(13)-98++, b(14)++, b(14)-98++, b(15)++, b(15)-98++, b(16)-98++, b(16)++

**Matched y ions:** y(2), y(3), y(4), y(5), y(6), y(6)++, y(7), y(8), y(9), y(10), y(11), y(11)++, y(12)++, y(13), y(15)++, y(15)-98++, y(16)-98++, y(16)++

**Precursor origin neutral loss:** +

## Peptide No.505

**KRHSGDFGADAQGAMSK**

**Confirmed sites:** @S:4

**Ambiguous sites:**

MS/MS Fragmentation of **KRHSGDFGADAQGAMSK**

Found in **MYG\_MOUSE**, Myoglobin OS=Mus musculus GN=Mb PE=1 SV=3

Match to Query 4530: 1943.977496 from(487.001650,4+)

Title: Elution from: 25.443 to 25.443 scan no 1535 cid35.00 polarity:+:MA10:m1s

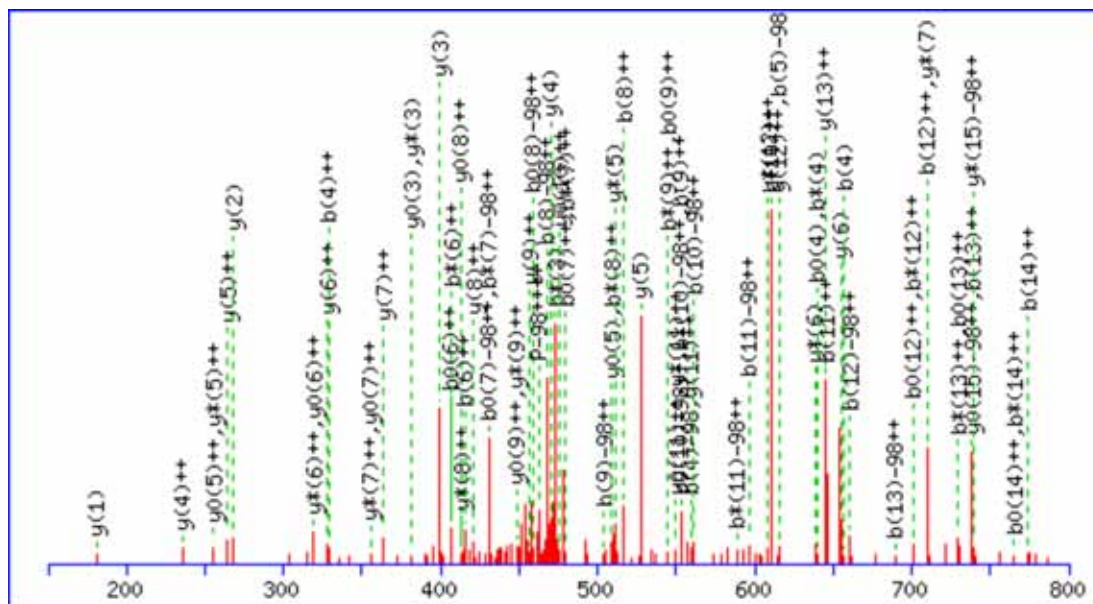

**Monoisotopic mass of neutral peptide Mr(calc):** 1943.9773

**Fixed modifications:** Carbamidomethyl (C) (apply to specified residues or termini only)

**Variable modifications:**

**N-term :** Dimethyl:2H(4)13C(2) (N-term)

**K1 :** Dimethyl:2H(4)13C(2) (K)

**S4 :** Phospho (ST), with neutral losses 0.0000(shown in table), 97.9769

**K17 :** Dimethyl:2H(4)13C(2) (K)

**Ions Score:** 41 **Expect:** 0.0052

**Matched b ions:** b(4)++, b(4)-98, b(4), b(5)-98, b(6)++, b(8)-98++, b(8)++, b(9)++, b(9)-98++, b(10)++, b(10)-98++, b(11)++, b(11)-98++, b(12)++, b(12)-98++, b(13)++, b(13)-98++, b(14)++

**Matched y ions:** y(1), y(2), y(3), y(4)++, y(4), y(5), y(5)++, y(6)++, y(6), y(7)++, y(8)++, y(9)++, y(11)++, y(12)++, y(13)++

**Precursor origin neutral loss:**

## Peptide No.506

**KSLDSEDESEDEDDDYQQK**

**Confirmed sites:** @S:2,@S:5

**Ambiguous sites:**

MS/MS Fragmentation of **KSLDSEDESEDEDDDYQQK**

Found in **HAP28\_MOUSE**, 28 kDa heat- and acid-stable phosphoprotein OS=Mus musculus GN=Pdap1 PE=1 SV=1

Match to Query 5779: 2388.881145 from(797.300991,3+)

Title: Elution from: 30.980 to 30.980 scan no 2142 cid35.00 polarity:+:MA10:m1s

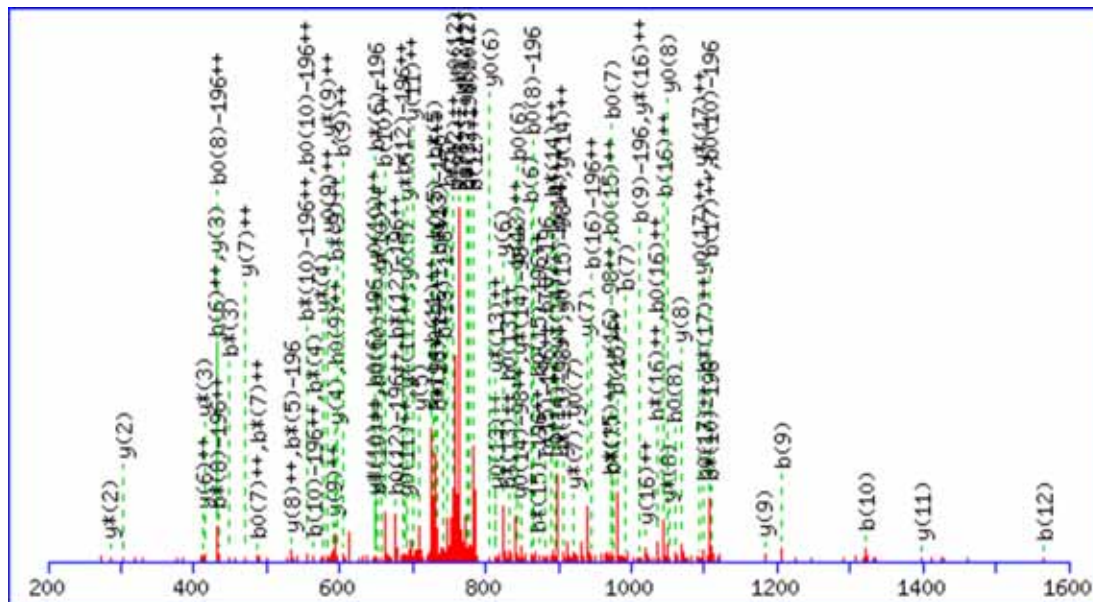

**Monoisotopic mass of neutral peptide Mr(calc):** 2388.8771

**Fixed modifications:** Carbamidomethyl (C) (apply to specified residues or termini only)

**Variable modifications:**

**N-term :** Dimethyl (N-term)

**K1 :** Dimethyl (K)

**S2 :** Phospho (ST), with neutral losses 0.0000(shown in table), 97.9769

**S5 :** Phospho (ST), with neutral losses 0.0000(shown in table), 97.9769

**K18 :** Dimethyl (K)

**Ions Score:** 41 **Expect:** 0.0018

**Matched b ions:** b(5), b(5)-98, b(6)++, b(6)-98, b(6), b(7), b(8)-98, b(8)-98++, b(8)-196, b(9), b(9)-98++, b(9)-98, b(9)++, b(9)-196, b(10)++, b(10), b(10)-98++, b(10)-196++, b(10)-98, b(11)++, b(11)-98++, b(12)++, b(12), b(12)-196++, b(12)-98++, b(13)++, b(13)-196++, b(14)++, b(14)-98++, b(15)++, b(15)-98++, b(15)-196++, b(16)++, b(16)-98++, b(16)-196++, b(17)++, b(17)-98++

**Matched y ions:** y(2), y(3), y(4), y(5), y(6), y(6)++, y(7), y(7)++, y(8)++, y(8), y(9), y(9)++, y(10)++, y(11), y(11)++, y(12)++, y(14)++, y(16)-98++, y(16)++

**Precursor origin neutral loss:** +

## Peptide No.507

**KSLDSDESEDEDDDYQQK**

**Confirmed sites:** @S:5,@S:8

**Ambiguous sites:**

MS/MS Fragmentation of **KSLDSDESEDEDDDYQQK**

Found in **HAP28\_MOUSE**, 28 kDa heat- and acid-stable phosphoprotein OS=Mus musculus GN=Pdap1 PE=1 SV=1

Match to Query 6299: 2388.882930 from(797.301586,3+)

Title: Elution from: 31.160 to 31.160 scan no 2263 cid35.00 polarity:+:MA10:m1s



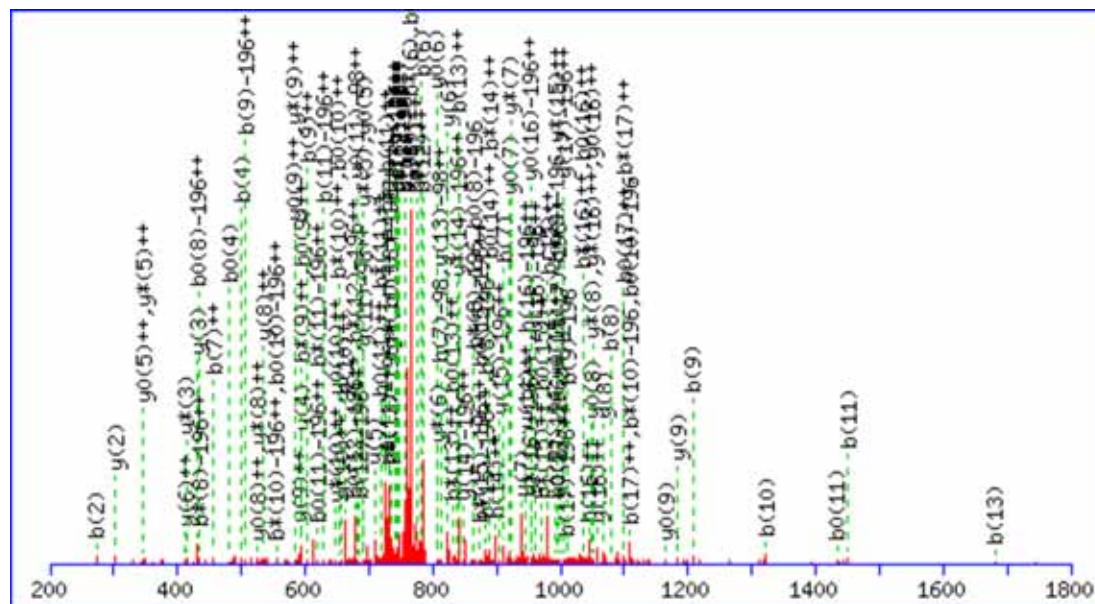

**Monoisotopic mass of neutral peptide Mr(calc):** 2388.8771

**Fixed modifications:** Carbamidomethyl (C) (apply to specified residues or termini only)

**Variable modifications:**

**N-term :** Dimethyl (N-term)

**K1 :** Dimethyl (K)

**S5 :** Phospho (ST), with neutral losses 0.0000(shown in table), 97.9769

**S8 :** Phospho (ST), with neutral losses 0.0000(shown in table), 97.9769

**K18 :** Dimethyl (K)

**Ions Score:** 51 **Expect:** 0.00017

**Matched b ions:** b(2), b(4), b(6), b(7)++, b(7), b(7)-98, b(8)-98++, b(8)-98, b(8)-196, b(8), b(9)-98, b(9), b(9)-98++, b(9)++, b(9)-196++, b(9)-196, b(10)++, b(10), b(10)-98++, b(11), b(11)++, b(11)-98++, b(11)-196++, b(12)++, b(12)-196++, b(12)-98++, b(13), b(13)++, b(13)-196++, b(14)++, b(14)-98++, b(15)++, b(15)-196++, b(15)-98++, b(16)++, b(16)-196++, b(16)-98++, b(17)++, b(17)-98++, b(17)-196++

**Matched y ions:** y(2), y(3), y(4), y(5), y(6), y(6)++, y(7), y(8)++, y(8), y(9), y(9)++, y(10)++, y(11)-98++, y(11)++, y(12)-98++, y(13)-98++, y(14)-196++, y(14)++, y(15)-196++, y(15)-98++, y(16)++, y(16)-196++, y(17)-196++

**Precursor origin neutral loss:** +

## Peptide No.508

**KSLDSDESEDEDDDYQQK**

**Confirmed sites:** @S:2,@S:5

**Ambiguous sites:**

MS/MS Fragmentation of **KSLDSDESEDEDDDYQQK**

Found in **HAP28\_MOUSE**, 28 kDa heat- and acid-stable phosphoprotein OS=Mus musculus GN=Pdap1 PE=1 SV=1

Match to Query 6399: 2406.974121 from(803.331983,3+)

Title: Elution from: 31.267 to 31.267 scan no 2280 cid35.00 polarity:+:MA10:m1s

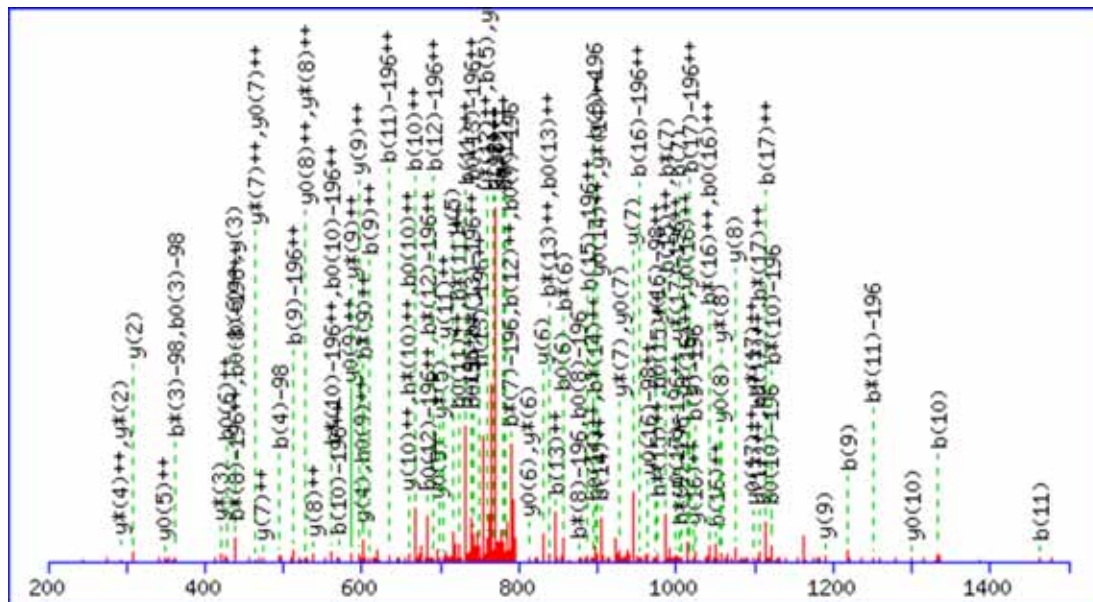

**Monoisotopic mass of neutral peptide Mr(calc):** 2406.9725

**Fixed modifications:** Carbamidomethyl (C) (apply to specified residues or termini only)

**Variable modifications:**

**N-term :** Dimethyl:2H(4)13C(2) (N-term)

**K1 :** Dimethyl:2H(4)13C(2) (K)

**S2 :** Phospho (ST), with neutral losses 0.0000(shown in table), 97.9769

**S5 :** Phospho (ST), with neutral losses 0.0000(shown in table), 97.9769

**K18 :** Dimethyl:2H(4)13C(2) (K)

**Ions Score:** 41 **Expect:** 0.0034

**Matched b ions:** b(4)-98, b(5), b(6)++, b(6)-98, b(7)-98, b(7), b(8)-98++, b(8)-98, b(8)-196, b(9)-196++, b(9), b(9)-98++, b(9)-98, b(9)-196, b(9)++, b(10), b(10)-98++, b(10)++, b(10)-98, b(10)-196++, b(11)++, b(11), b(11)-98++, b(11)-196++, b(12)++, b(12)-98++, b(12)-196++, b(13)++, b(13)-196++, b(14)++, b(14)-98++, b(15)++, b(15)-98++, b(15)-196++, b(16)++, b(16)-196++, b(16)-98++, b(17)++, b(17)-98++, b(17)-196++

**Matched y ions:** y(2), y(3), y(4), y(5), y(6), y(7), y(7)++, y(8)++, y(8), y(9), y(9)++, y(10)++, y(11)++, y(12)++, y(16)-98++, y(16)++, y(17)++, y(17)-98++

**Precursor origin neutral loss:** +

## Peptide No.509

**KSLDSDESEDEDDDYQQK**

**Confirmed sites:** @S:2,@S:8

**Ambiguous sites:**

MS/MS Fragmentation of **KSLDSDESEDEDDDYQQK**

Found in **HAP28\_MOUSE**, 28 kDa heat- and acid-stable phosphoprotein OS=Mus musculus GN=Pdap1 PE=1 SV=1

Match to Query 6315: 2406.975969 from(803.332599,3+)

Title: Elution from: 31.115 to 31.115 scan no 2257 cid35.00 polarity:+:MA10:m1s

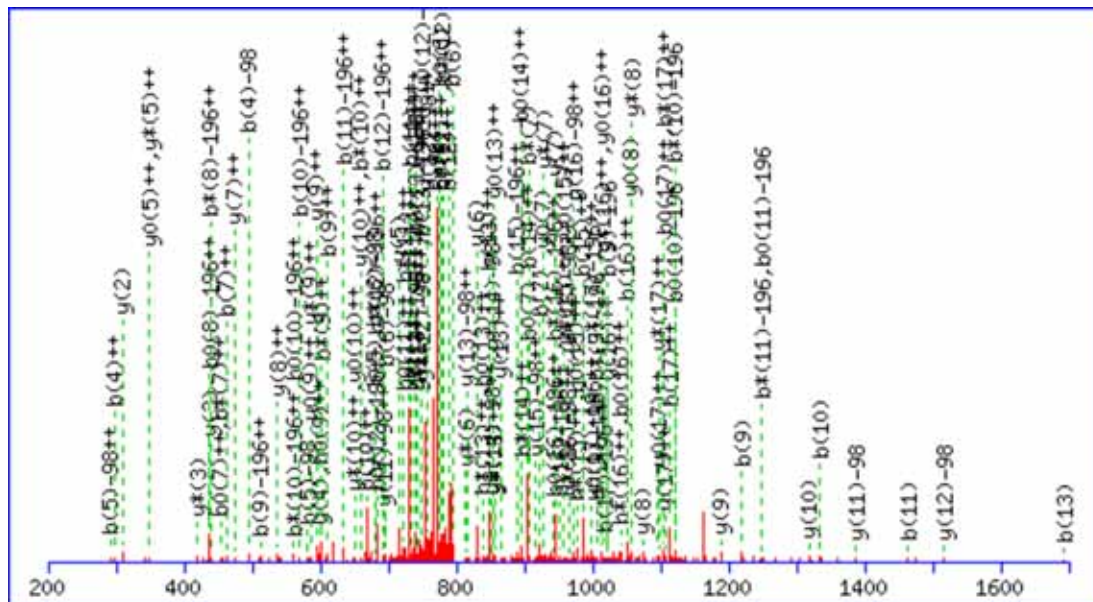

**Monoisotopic mass of neutral peptide Mr(calc):** 2406.9725

**Fixed modifications:** Carbamidomethyl (C) (apply to specified residues or termini only)

**Variable modifications:**

**N-term :** Dimethyl:2H(4)13C(2) (N-term)

**K1 :** Dimethyl:2H(4)13C(2) (K)

**S2 :** Phospho (ST), with neutral losses 0.0000(shown in table), 97.9769

**S8 :** Phospho (ST), with neutral losses 0.0000(shown in table), 97.9769

**K18 :** Dimethyl:2H(4)13C(2) (K)

**Ions Score:** 47 **Expect:** 0.00079

**Matched b ions:** b(4)++, b(4)-98, b(5)-98++, b(5)-98, b(5), b(6), b(6)-98, b(7)++, b(7), b(8)-98++, b(8)-98, b(9)-98++, b(9), b(9)-196++, b(9)-98, b(9)++, b(9)-196, b(10)++, b(10), b(10)-98, b(10)-98++, b(10)-196++, b(11), b(11)-98++, b(11)++, b(11)-196++, b(12)++, b(12)-98++, b(12)-196++, b(13), b(13)++, b(13)-196++, b(14)++, b(14)-98++, b(15)++, b(15)-196++, b(15)-98++, b(16)++, b(16)-196++, b(16)-98++, b(17)++, b(17)-196++

**Matched y ions:** y(2), y(3), y(4), y(5), y(6), y(7), y(7)++, y(8)++, y(8), y(9)++, y(9), y(10), y(10)++, y(11)-98, y(11)-98++, y(11)++, y(12)-98, y(12)-98++, y(13)-98++, y(13)++, y(15)-98++, y(16)-98++, y(16)++, y(17)++, y(17)-98++

**Precursor origin neutral loss:** +

## Peptide No.510

**KSPDFNLTGSQSNMLK**

**Confirmed sites:** @S:2,@T:8,@S:10

**Ambiguous sites:**

MS/MS Fragmentation of **KSPDFNLTGSQSNMLK**

Found in **NMDE1\_MOUSE**, Glutamate [NMDA] receptor subunit epsilon-1 OS=Mus musculus GN=Grin2a PE=1 SV=2

Match to Query 5426: 2055.818844 from(514.961987,4+)

Title: Elution from: 35.040 to 35.040 scan no 2825 cid35.00 polarity:+:MA10:m1s

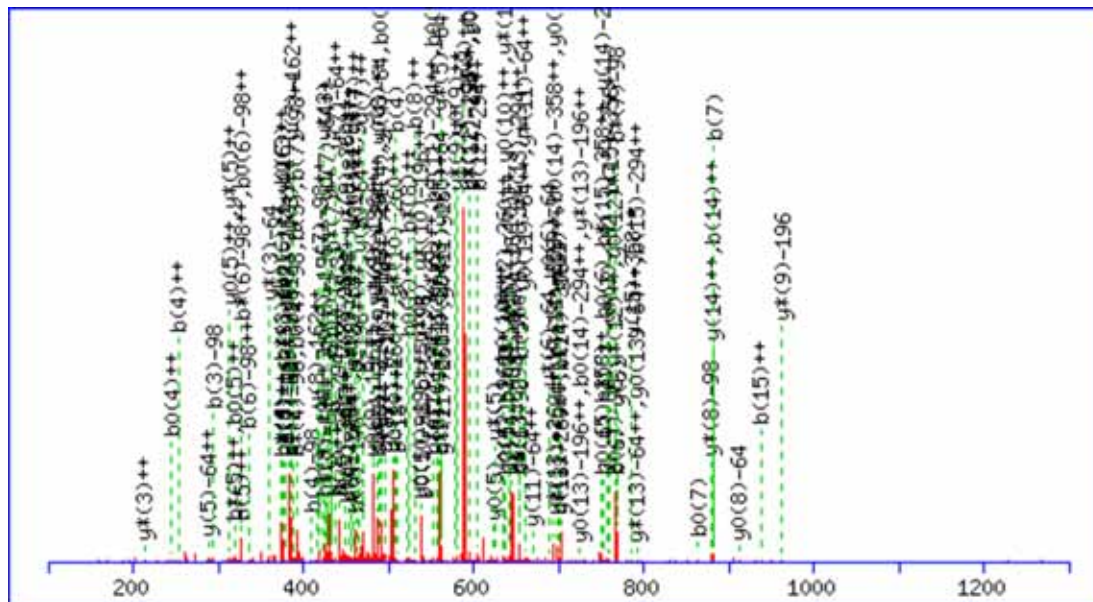

**Monoisotopic mass of neutral peptide Mr(calc):** 2055.8239

**Fixed modifications:** Carbamidomethyl (C) (apply to specified residues or termini only)

**Variable modifications:**

**S2 :** Phospho (ST), with neutral losses 0.0000(shown in table), 97.9769

**T8 :** Phospho (ST), with neutral losses 0.0000(shown in table), 97.9769

**S10 :** Phospho (ST), with neutral losses 0.0000(shown in table), 97.9769

**M14 :** Oxidation (M), with neutral losses 0.0000(shown in table), 63.9983

**K16 :** Dimethyl:2H(4)13C(2) (K)

**Ions Score:** 30 **Expect:** 0.026

**Matched b ions:** b(3), b(3)-98, b(4)++, b(4)-98, b(4), b(5)++, b(5)-98, b(5), b(6)++, b(6), b(6)-98++, b(7)++, b(7), b(7)-98++, b(8)-98++, b(8)++, b(9)++, b(9)-196++, b(10)++, b(10)-294++, b(10)-98++, b(11)-294++, b(11)-98++, b(12)-98++, b(12)++, b(12)-196++, b(12)-294++, b(13)-98++, b(14)++, b(15)++, b(15)-294++

**Matched y ions:** y(3), y(5), y(6)++, y(6), y(7)++, y(7)-98++, y(8)-98++, y(8)++, y(9)++, y(9)-98++, y(9)-196++, y(10)++, y(10)-98++, y(11)-98++, y(11)++, y(12)-98++, y(14)++

**Precursor origin neutral loss:**

## Peptide No.511

**KSSDIKPGLSSKK**

**Confirmed sites:** @S:2,@S:10,@S:11

**Ambiguous sites:**

MS/MS Fragmentation of **KSSDIKPGLSSKK**

Found in **NUFP2\_MOUSE**, Nuclear fragile X mental retardation-interacting protein 2 OS=Mus musculus GN=Nufip2 PE=1 SV=1

Match to Query 2941: 1641.721431 from(548.247753,3+)

Title: Elution from: 20.948 to 20.948 scan no 1033 cid35.00 polarity:+:MA10:m1s



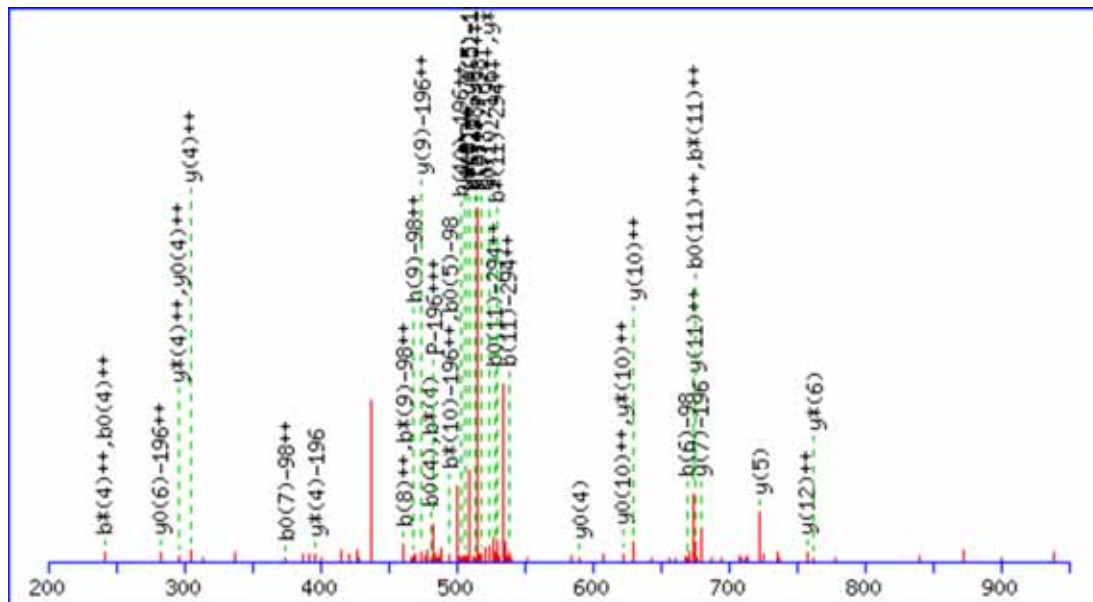

**Monoisotopic mass of neutral peptide Mr(calc):** 1641.7181

**Fixed modifications:** Carbamidomethyl (C) (apply to specified residues or termini only)

**Variable modifications:**

**S2 :** Phospho (ST), with neutral losses 0.0000(shown in table), 97.9769

**K6 :** Dimethyl (K)

**S10 :** Phospho (ST), with neutral losses 0.0000(shown in table), 97.9769

**S11 :** Phospho (ST), with neutral losses 0.0000(shown in table), 97.9769

**Ions Score:** 33 **Expect:** 0.017

**Matched b ions:** b(2), b(5)-98, b(6)-98, b(8)++, b(9)-98++, b(9)++, b(10)-98++, b(10)-196++, b(11)-294++

**Matched y ions:** y(4)++, y(4)-98, y(5), y(7)-196, y(7)-98, y(8)++, y(8)-98++, y(9)-98++, y(9)-196++, y(10)++, y(11)++, y(12)++, y(12)-98++

**Precursor origin neutral loss:** +

## Peptide No.512

**KTPSPIEAER**

**Confirmed sites:** @S:4

**Ambiguous sites:**

**MS/MS Fragmentation of** **KTPSPIEAER**

Found in **TITIN\_MOUSE**, Titin OS=Mus musculus GN=Ttn PE=1 SV=1

Match to Query 1477: 1262.627931 from(421.883253,3+)

Title: Elution from: 23.851 to 23.851 scan no 1478 cid35.00 polarity:+:MA10

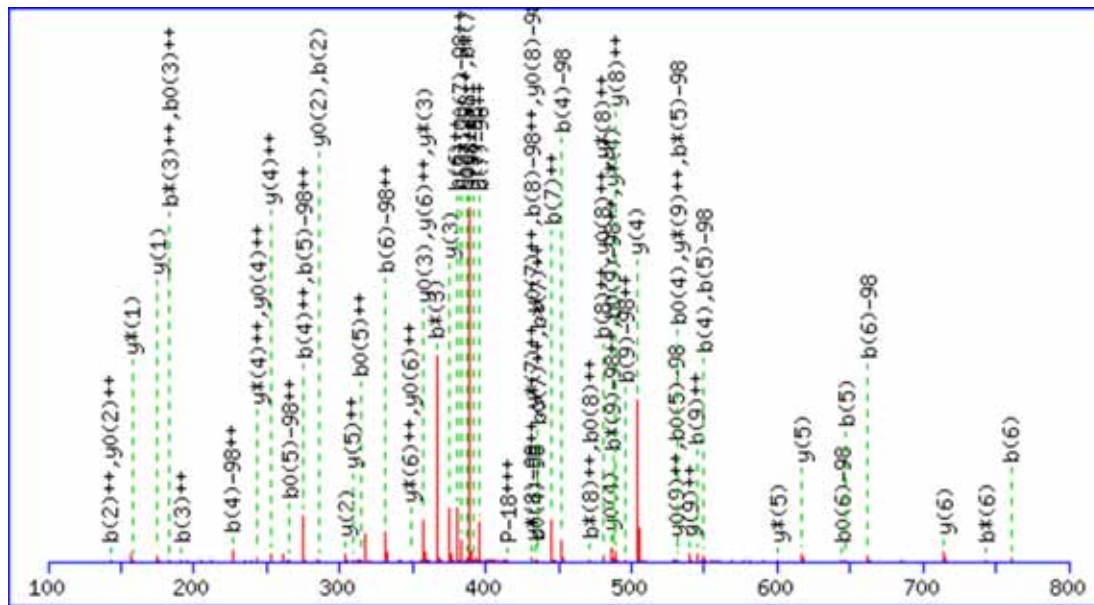

**Monoisotopic mass of neutral peptide Mr(calc):** 1262.6271

**Fixed modifications:** Carbamidomethyl (C) (apply to specified residues or termini only)

**Variable modifications:**

**N-term :** Dimethyl (N-term)

**K1 :** Dimethyl (K)

**S4 :** Phospho (ST), with neutral losses 97.9769(shown in table), 0.0000

**Ions Score:** 37 **Expect:** 0.0081

**Matched b ions:** b(2)++, b(2), b(3)++, b(3), b(4)-98++, b(4)++, b(4), b(4)-98, b(5)-98++, b(5)-98, b(5), b(6), b(6)-98++, b(6)-98, b(6)++, b(7)++, b(7)-98++, b(8)++, b(8)-98++, b(9)++, b(9)-98++

**Matched y ions:** y(1), y(2), y(3), y(4), y(4)++, y(5), y(5)++, y(6), y(6)++, y(7)-98++, y(8)++, y(9)++

**Precursor origin neutral loss:** +

## Peptide No.513

**KTPSPIEAER**

**Confirmed sites:** @T:2

**Ambiguous sites:**

**MS/MS Fragmentation of** **KTPSPIEAER**

Found in **TITIN\_MOUSE**, Titin OS=Mus musculus GN=Ttn PE=1 SV=1

Match to Query 1354: 1274.690937 from(425.904255,3+)

Title: Elution from: 23.819 to 23.819 scan no 1352 cid35.00 polarity:+:MA10

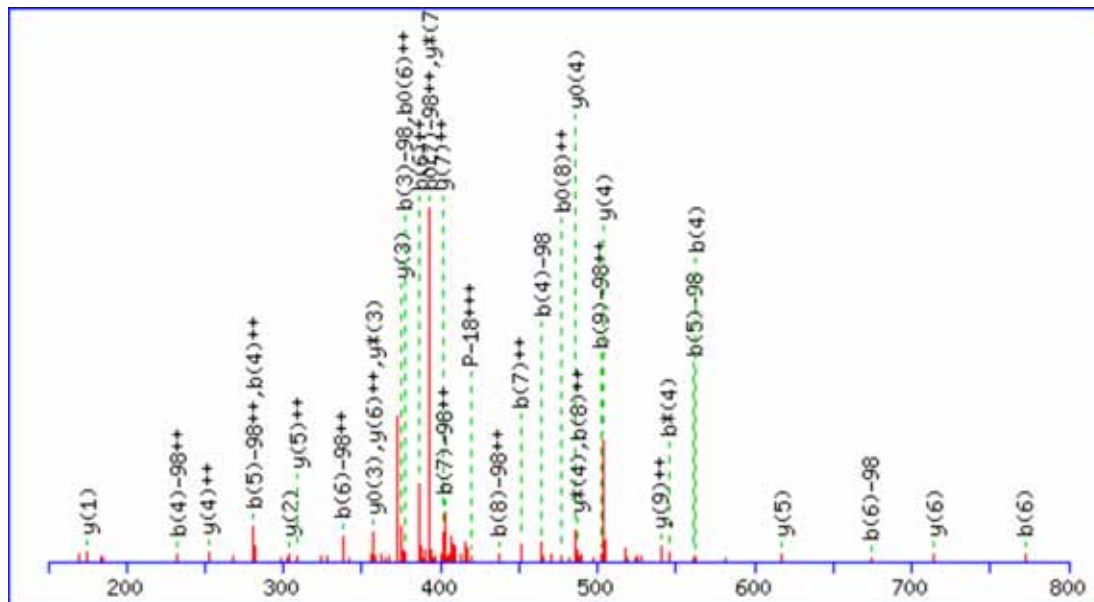

**Monoisotopic mass of neutral peptide Mr(calc):** 1274.6908

**Fixed modifications:** Carbamidomethyl (C) (apply to specified residues or termini only)

**Variable modifications:**

**N-term :** Dimethyl:2H(4)13C(2) (N-term)

**K1 :** Dimethyl:2H(4)13C(2) (K)

**T2 :** Phospho (ST), with neutral losses 97.9769(shown in table), 0.0000

**Ions Score:** 36 **Expect:** 0.0084

**Matched b ions:** b(3)-98, b(4)++, b(4)-98++, b(4)-98, b(4), b(5)-98++, b(5)-98, b(6), b(6)-98, b(6)-98++, b(6)++, b(7)-98++, b(7)++, b(8)++, b(8)-98++, b(9)-98++

**Matched y ions:** y(1), y(2), y(3), y(4)++, y(4), y(5), y(5)++, y(6), y(6)++, y(7)++, y(9)++

**Precursor origin neutral loss:** +

## Peptide No.514

**KTPSPIEAERK**

**Confirmed sites:** @S:4

**Ambiguous sites:**

MS/MS Fragmentation of **KTPSPIEAERK**

Found in **TITIN\_MOUSE**, Titin OS=Mus musculus GN=Ttn PE=1 SV=1

Match to Query 2099: 1418.753610 from(473.925146,3+)

Title: Elution from: 21.730 to 21.730 scan no 1196 cid35.00 polarity:+:MA10

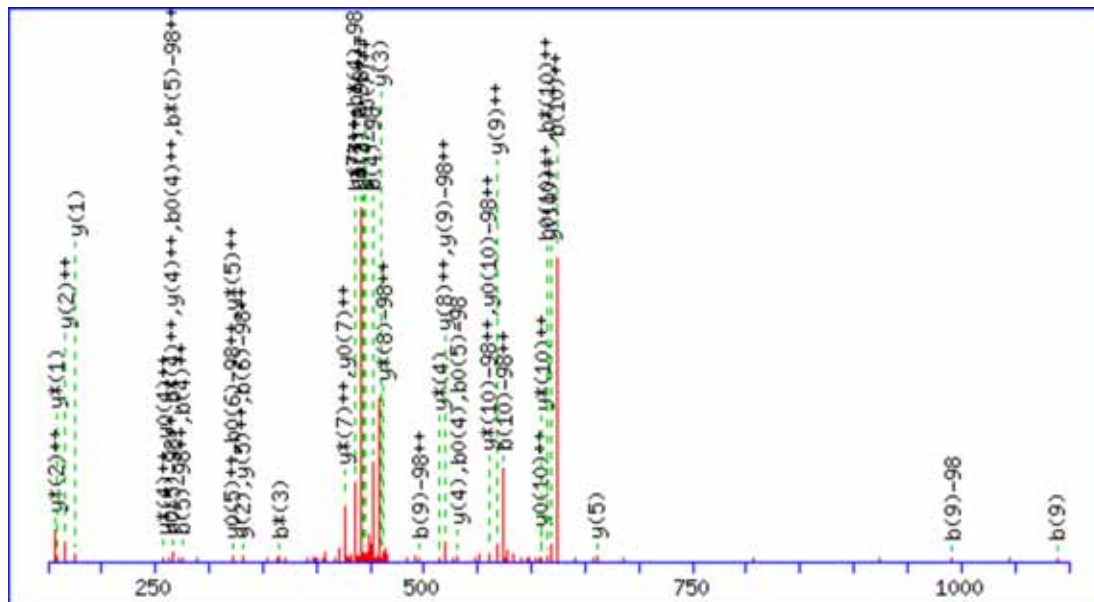

**Monoisotopic mass of neutral peptide Mr(calc):** 1418.7534

**Fixed modifications:** Carbamidomethyl (C) (apply to specified residues or termini only)

**Variable modifications:**

**N-term :** Dimethyl (N-term)

**K1 :** Dimethyl (K)

**S4 :** Phospho (ST), with neutral losses 0.0000(shown in table), 97.9769

**K11 :** Dimethyl (K)

**Ions Score:** 39 **Expect:** 0.0061

**Matched b ions:** b(4)++, b(4)-98, b(5)-98++, b(6)-98++, b(7)++, b(9)-98, b(9), b(9)-98++, b(10)++, b(10)-98++

**Matched y ions:** y(1), y(2)++, y(2), y(3), y(4)++, y(4), y(5), y(5)++, y(7)++, y(8)++, y(9)-98++, y(9)++, y(10)++

**Precursor origin neutral loss:** +

## Peptide No.515

**KTPSPIEAERK**

**Confirmed sites:** @S:4

**Ambiguous sites:**

**MS/MS Fragmentation of** **KTPSPIEAERK**

Found in **TITIN\_MOUSE**, Titin OS=Mus musculus GN=Ttn PE=1 SV=1

Match to Query 1727: 1436.849877 from(479.957235,3+)

Title: Elution from: 21.731 to 21.731 scan no 1112 cid35.00 polarity:+:MA10



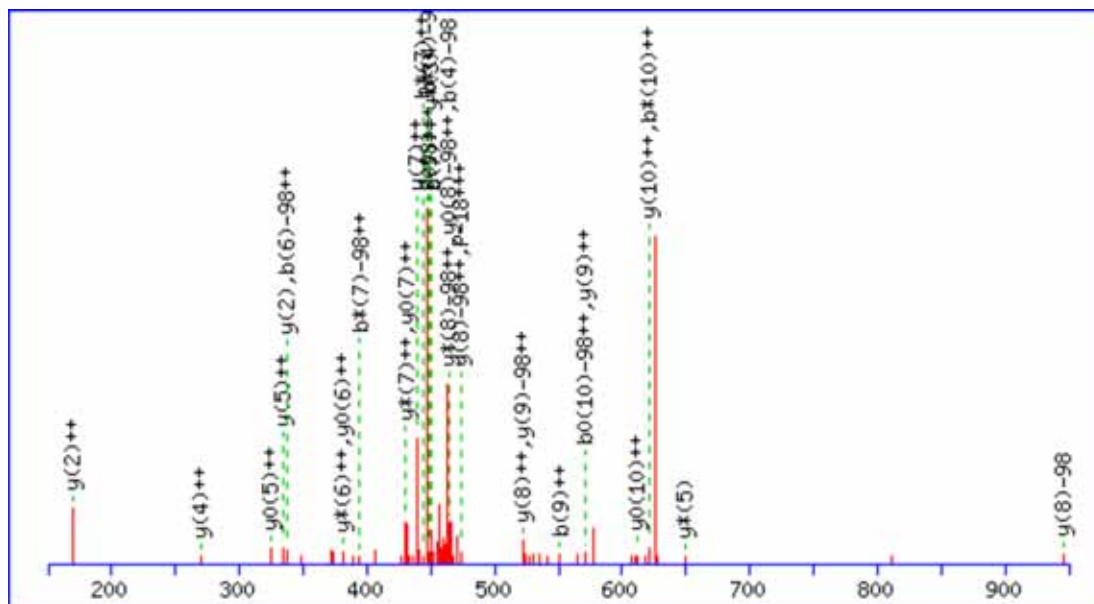

**Monoisotopic mass of neutral peptide Mr(calc):** 1436.8488

**Fixed modifications:** Carbamidomethyl (C) (apply to specified residues or termini only)

**Variable modifications:**

**N-term :** Dimethyl:2H(4)13C(2) (N-term)

**K1 :** Dimethyl:2H(4)13C(2) (K)

**S4 :** Phospho (ST), with neutral losses 97.9769(shown in table), 0.0000

**K11 :** Dimethyl:2H(4)13C(2) (K)

**Ions Score:** 29 **Expect:** 0.03

**Matched b ions:** b(4)-98, b(6)-98++, b(7)++, b(9)++

**Matched y ions:** y(2)++, y(2), y(4)++, y(5)++, y(7)++, y(8)-98, y(8)++, y(8)-98++, y(9)-98++, y(9)++, y(10)++

**Precursor origin neutral loss:** +

## Peptide No.516

**KTSEFDENDSEELEDK**

**Confirmed sites:** @S:3,@S:9

**Ambiguous sites:**

MS/MS Fragmentation of **KTSEFDENDSEELEDK**

Found in **IF2P\_MOUSE**, Eukaryotic translation initiation factor 5B OS=Mus musculus GN=Eif5b PE=1 SV=2

Match to Query 5742: 2028.784856 from(1015.399704,2+)

Title: Elution from: 35.338 to 35.338 scan no 3036 cid35.00 polarity:+:MA10

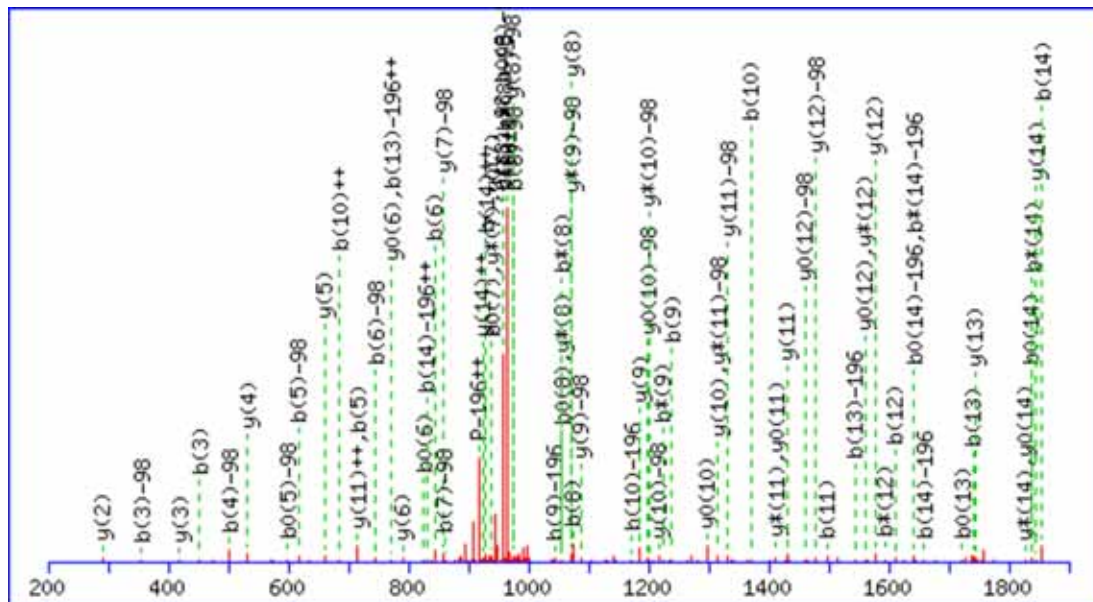

**Monoisotopic mass of neutral peptide Mr(calc):** 2028.7853

**Fixed modifications:** Carbamidomethyl (C) (apply to specified residues or termini only)

**Variable modifications:**

**N-term :** Dimethyl (N-term)

**K1 :** Dimethyl (K)

**S3 :** Phospho (ST), with neutral losses 0.0000(shown in table), 97.9769

**S9 :** Phospho (ST), with neutral losses 0.0000(shown in table), 97.9769

**K15 :** Dimethyl (K)

**Ions Score:** 69 **Expect:** 2.8e-006

**Matched b ions:** b(3), b(3)-98, b(4)-98, b(5), b(5)-98, b(6), b(6)-98, b(7)-98, b(7), b(8), b(8)-98, b(9)-98, b(9)-98++, b(9), b(9)-196, b(10)-98, b(10)++, b(10)-98++, b(10)-196, b(10), b(11), b(11)-98, b(12), b(12)-98, b(13)-98, b(13)-196++, b(13), b(13)-196, b(14)-98, b(14), b(14)-196, b(14)-196++, b(14)++

**Matched y ions:** y(2), y(3), y(4), y(5), y(6), y(7)-98, y(7), y(8), y(8)-98, y(9), y(9)-98, y(10)-98, y(10), y(11)++, y(11), y(11)-98, y(12), y(12)-98, y(13)-98, y(13), y(14), y(14)-98, y(14)++

**Precursor origin neutral loss:** +

## Peptide No.517

**KVELSESEEDK**

**Confirmed sites:** @S:5,@S:7

**Ambiguous sites:**

MS/MS Fragmentation of **KVELSESEEDK**

Found in **SRRM1\_MOUSE**, Serine/arginine repetitive matrix protein 1 OS=Mus musculus GN=Srrm1 PE=1 SV=1

Match to Query 2743: 1535.642354 from(768.828453,2+)

Title: Elution from: 27.785 to 27.785 scan no 2000 cid35.00 polarity:+:MA10

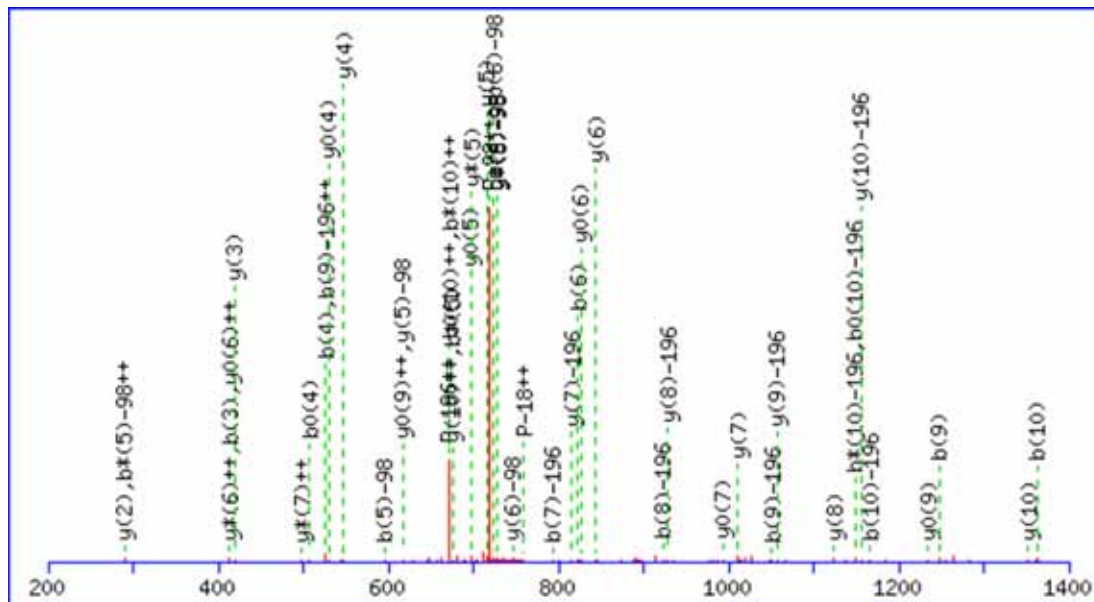

**Monoisotopic mass of neutral peptide Mr(calc):** 1535.6408

**Fixed modifications:** Carbamidomethyl (C) (apply to specified residues or termini only)

**Variable modifications:**

**N-term :** Dimethyl (N-term)

**K1 :** Dimethyl (K)

**S5 :** Phospho (ST), with neutral losses 97.9769(shown in table), 0.0000

**S7 :** Phospho (ST), with neutral losses 97.9769(shown in table), 0.0000

**K11 :** Dimethyl (K)

**Ions Score:** 34 **Expect:** 0.009

**Matched b ions:** b(3), b(4), b(5)-98, b(6), b(6)-98, b(7)-98, b(7)-196, b(8)-98, b(8)-196, b(9)-196++, b(9)-98, b(9), b(9)-196, b(10)-98, b(10), b(10)-196

**Matched y ions:** y(2), y(3), y(4), y(5), y(5)-98, y(6)-98, y(6), y(7)-98, y(7)-196, y(7), y(8)-98, y(8), y(8)-196, y(9)-196, y(10), y(10)-98, y(10)-196, y(10)-98++, y(10)++

**Precursor origin neutral loss:** +

## Peptide No.518

**LDCAKTKADASSK**

**Confirmed sites:** @S:11,@S:12

**Ambiguous sites:**

MS/MS Fragmentation of **LDCAKTKADASSK**

Found in **SMC2\_MOUSE**, Structural maintenance of chromosomes protein 2 OS=Mus musculus  
GN=Smc2 PE=1 SV=1

Match to Query 3400: 1643.743608 from(548.921812,3+)

Title: Elution from: 29.600 to 29.600 scan no 2250 cid35.00 polarity:+:MA10

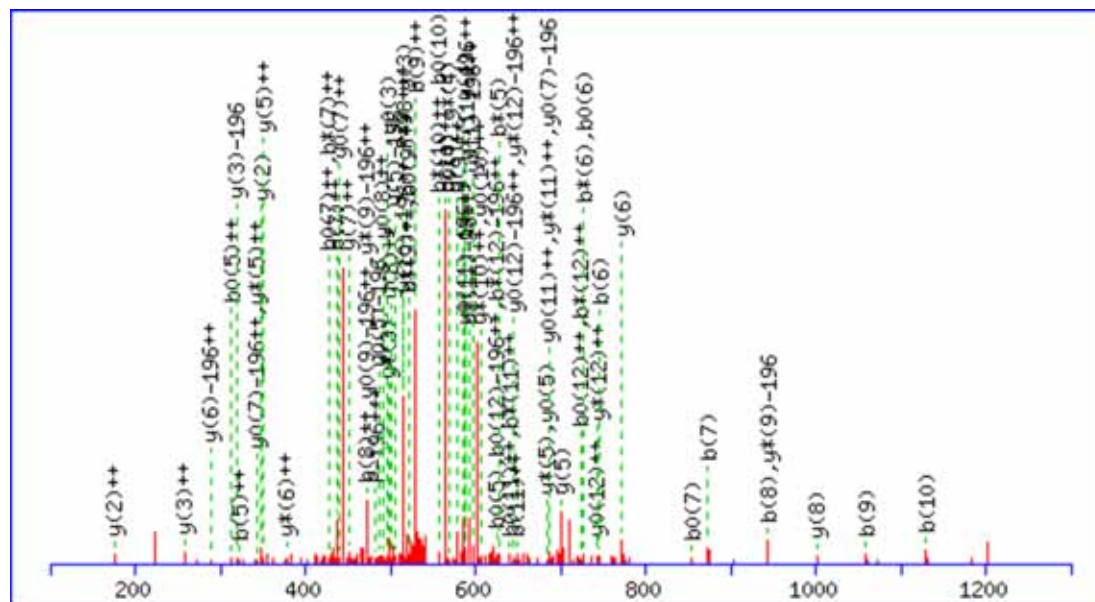

**Monoisotopic mass of neutral peptide Mr(calc):** 1643.7455

**Fixed modifications:** Carbamidomethyl (C) (apply to specified residues or termini only)

**Variable modifications:**

**N-term :** Dimethyl (N-term)

**K5 :** Dimethyl (K)

**S11 :** Phospho (ST), with neutral losses 0.0000(shown in table), 97.9769

**S12 :** Phospho (ST), with neutral losses 0.0000(shown in table), 97.9769

**K13 :** Dimethyl:2H(4)13C(2) (K)

**Ions Score:** 29 **Expect:** 0.051

**Matched b ions:** b(5)++, b(6), b(7), b(7)++, b(8), b(8)++, b(9), b(9)++, b(10)++, b(10), b(11)++, b(12)-98++

**Matched y ions:** y(2), y(2)++, y(3)++, y(3), y(3)-196, y(4), y(5), y(5)++, y(5)-196, y(6), y(6)-196++, y(7)++, y(7)-98++, y(8), y(8)++, y(9)-98, y(9)-98++, y(9)++, y(10)-98++, y(10)-98, y(10)-196++, y(11)-196++, y(11)-98++

**Precursor origin neutral loss:** +

## Peptide No.519

**LDNTPASPPRSPTEPSDTPIAK**

**Confirmed sites:** @S:7,@S:11

**Ambiguous sites:**

MS/MS Fragmentation of **LDNTPASPPRSPTEPSDTPIAK**

Found in **TACC2\_MOUSE**, Transforming acidic coiled-coil-containing protein 2 OS=Mus musculus  
GN=Tacc2 PE=1 SV=2

Match to Query 7545: 2506.141596 from(836.387808,3+)

Title: Elution from: 36.853 to 36.853 scan no 3242 cid35.00 polarity:+:MA10:m1s



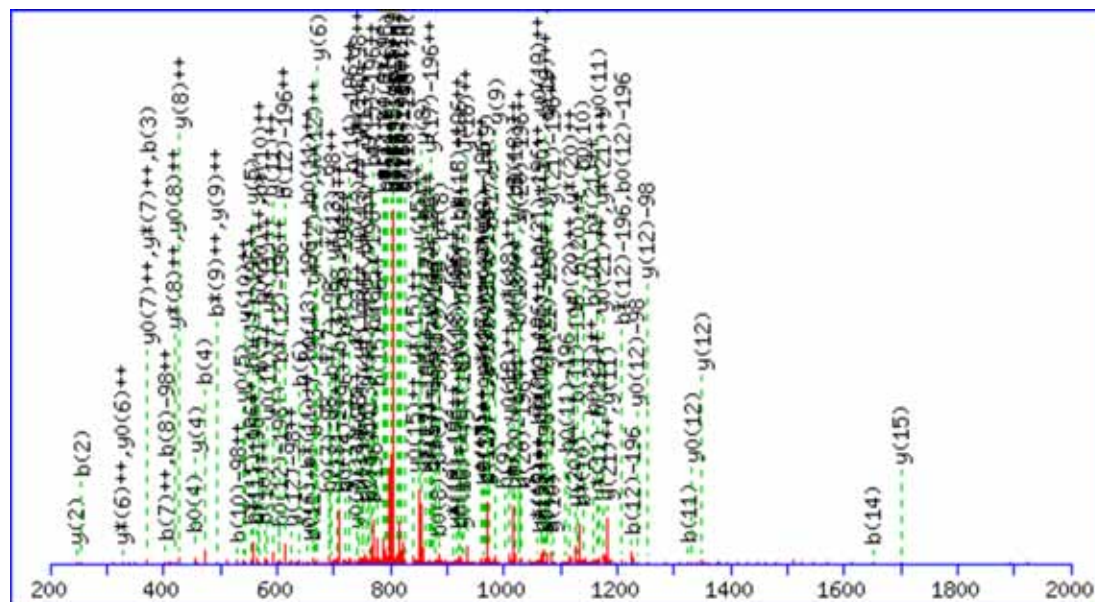

**Monoisotopic mass of neutral peptide Mr(calc):** 2506.1393

**Fixed modifications:** Carbamidomethyl (C) (apply to specified residues or termini only)

**Variable modifications:**

**N-term :** Dimethyl (N-term)

**S7 :** Phospho (ST), with neutral losses 0.0000(shown in table), 97.9769

**S11 :** Phospho (ST), with neutral losses 0.0000(shown in table), 97.9769

**K22 :** Dimethyl (K)

**Ions Score:** 47 **Expect:** 0.0016

**Matched b ions:** b(2), b(3), b(4), b(5), b(6), b(7)-98, b(7)++, b(7), b(8)-98++, b(8)-98, b(9), b(10)-98++, b(10)++, b(10)-98, b(10), b(11), b(11)-98++, b(11)-98, b(11)-196++, b(11)++, b(11)-196, b(12)-196++, b(12)-196, b(12)-98++, b(12)++, b(13)-196++, b(13)++, b(14), b(14)-196++, b(14)-98++, b(14)++, b(15)-196++, b(15)++, b(16)-196++, b(16)-98++, b(16)++, b(17)-98++, b(17)++, b(17)-196++, b(18)-196++, b(18)++, b(19)-98++, b(19)++, b(20)-196++, b(20)-98++, b(20)++, b(21)-196++, b(21)++, b(21)-98++

**Matched y ions:** y(2), y(4), y(5), y(6), y(7), y(8)++, y(8), y(9), y(9)++, y(10)++, y(10), y(11), y(11)++, y(12), y(12)-98, y(12)-98++, y(13)-98++, y(13)++, y(14)++, y(14)-98++, y(15)++, y(15), y(15)-98++, y(16)++, y(16)-98++, y(17)++, y(17)-98++, y(17)-196++, y(18)-98++, y(18)++, y(18)-196++, y(19)++, y(19)-98++, y(19)-196++, y(20)++, y(20)-98++, y(20)-196++, y(21)-98++, y(21)++, y(21)-196++

**Precursor origin neutral loss:** +

## Peptide No.520

**LEGDSVDSELEDRVDGVK**

**Confirmed sites:** @S:5,@S:9

**Ambiguous sites:**

MS/MS Fragmentation of **LEGDSVDSELEDRVDGVK**

Found in **MY18A\_MOUSE**, Myosin-XVIIIa OS=Mus musculus GN=Myo18a PE=1 SV=2

Match to Query 7015: 2291.946918 from(764.989582,3+)

Title: Elution from: 53.395 to 53.395 scan no 5287 cid35.00 polarity:+:MA10:m1s

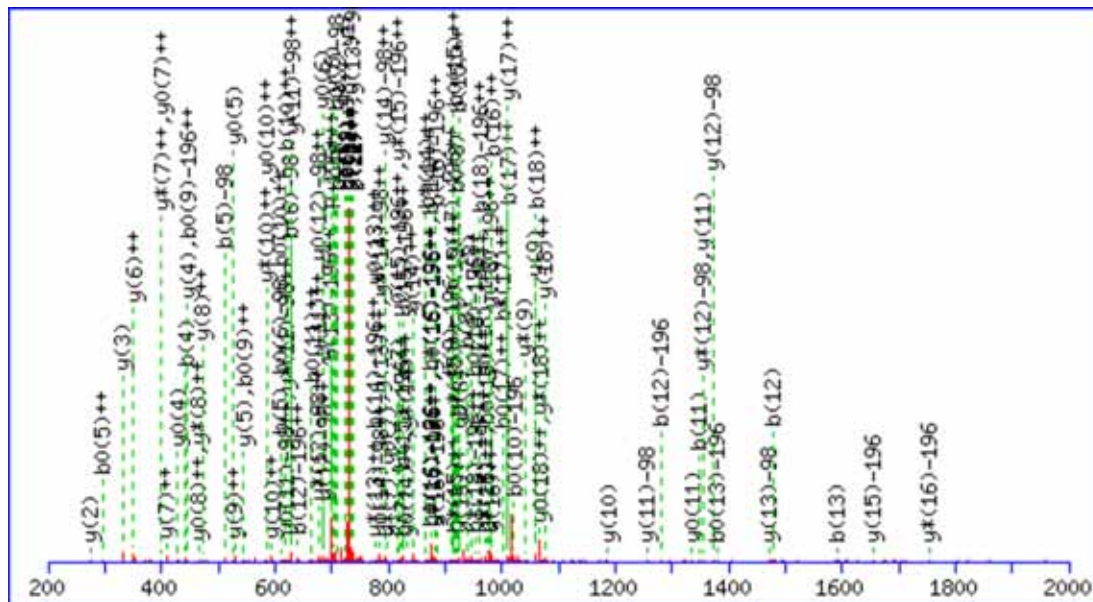

**Monoisotopic mass of neutral peptide Mr(calc):** 2291.9447

**Fixed modifications:** Carbamidomethyl (C) (apply to specified residues or termini only)

**Variable modifications:**

**N-term :** Dimethyl (N-term)

**S5 :** Phospho (ST), with neutral losses 97.9769(shown in table), 0.0000

**S9 :** Phospho (ST), with neutral losses 97.9769(shown in table), 0.0000

**K19 :** Dimethyl (K)

**Ions Score:** 43 **Expect:** 0.0022

**Matched b ions:** b(4), b(5)-98, b(5), b(6)-98, b(6), b(7)-98, b(7), b(8), b(9)-196, b(9)-98, b(10)-98, b(10)++, b(11), b(12)-98, b(12), b(12)-196++, b(12)-196, b(12)++, b(13), b(13)-98, b(13)-196++, b(13)-98++, b(14)-196++, b(14)-98++, b(14)++, b(15)-196++, b(15)-98++, b(15)++, b(16)-98++, b(16)++, b(16)-196++, b(17)-98++, b(17)++, b(18)-98++, b(18)-196++, b(18)++

**Matched y ions:** y(2), y(3), y(4), y(5), y(6)++, y(6), y(7)++, y(7), y(8)++, y(8), y(9)++, y(9), y(10)++, y(10), y(11)-98++, y(11)-98, y(11), y(11)++, y(12)-98, y(12)++, y(12)-98++, y(13)++, y(13)-98, y(13)-98++, y(14)++, y(14)-98++, y(15)-98++, y(15)-98, y(15)-196++, y(15)++, y(15)-196, y(16)-196++, y(16)-98++, y(16)++, y(17)++, y(17)-196++, y(17)-98++, y(18)++, y(18)-196++, y(18)-98++

**Precursor origin neutral loss:** +

## Peptide No.521

**LEQQVDDLEGSLEQEK**

**Confirmed sites:** @S:11

**Ambiguous sites:**

MS/MS Fragmentation of **LEQQVDDLEGSLEQEK**

Found in **MYH7\_MOUSE**, Myosin-7 OS=Mus musculus GN=Myh7 PE=1 SV=1

Match to Query 5562: 1994.912164 from(998.463358,2+)

Title: Elution from: 44.692 to 44.692 scan no 4267 cid35.00 polarity:+:MA10:m1s

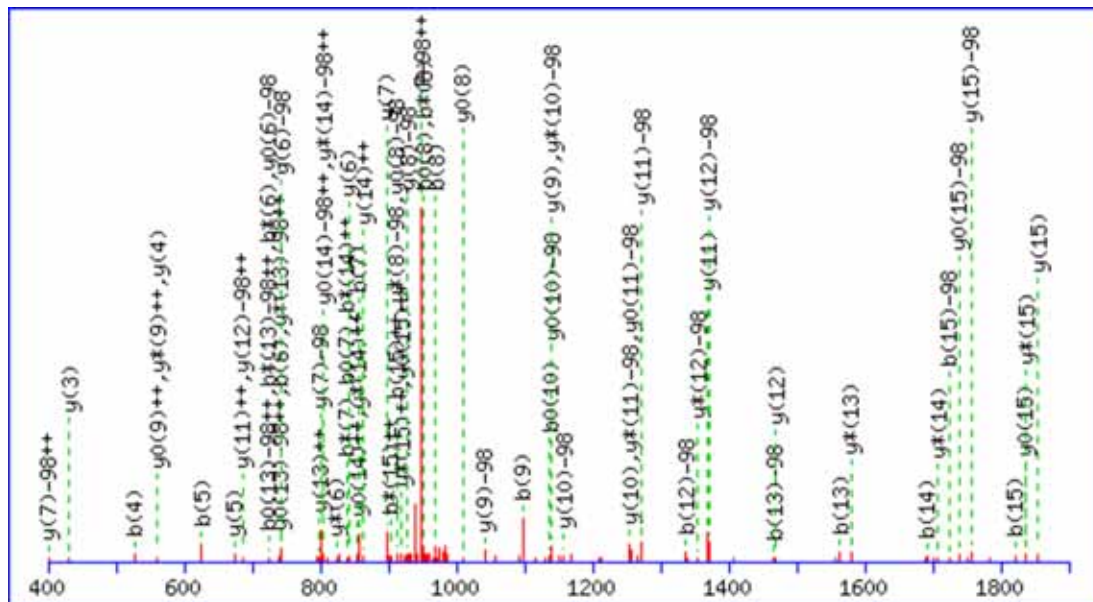

**Monoisotopic mass of neutral peptide Mr(calc):** 1994.9085

**Fixed modifications:** Carbamidomethyl (C) (apply to specified residues or termini only)

**Variable modifications:**

**N-term :** Dimethyl (N-term)

**S11 :** Phospho (ST), with neutral losses 97.9769(shown in table), 0.0000

**K16 :** Dimethyl (K)

**Ions Score:** 52 **Expect:** 0.00033

**Matched b ions:** b(4), b(5), b(6), b(7), b(8), b(9), b(12)-98, b(13), b(13)-98, b(14), b(15), b(15)-98, b(15)++

**Matched y ions:** y(3), y(4), y(5), y(6)-98, y(6), y(7)-98++, y(7)-98, y(7), y(8)-98, y(9), y(9)-98, y(10), y(10)-98, y(11)-98, y(11), y(11)++, y(12)-98, y(12), y(12)-98++, y(13)++, y(14)++, y(15)-98, y(15)

**Precursor origin neutral loss:** +

## Peptide No.522

**LEREDSSEEEEEIIDDEEIER**

**Confirmed sites:** @S:6,@S:7

**Ambiguous sites:**

MS/MS Fragmentation of **LEREDSSEEEEEIIDDEEIER**

Found in **MFAP1\_MOUSE**, Microfibrillar-associated protein 1 OS=Mus musculus GN=Mfap1 PE=1 SV=1

Match to Query 7149: 2796.042597 from(933.021475,3+)

Title: Elution from: 42.350 to 42.350 scan no 3795 cid35.00 polarity:+:MA10:m1s

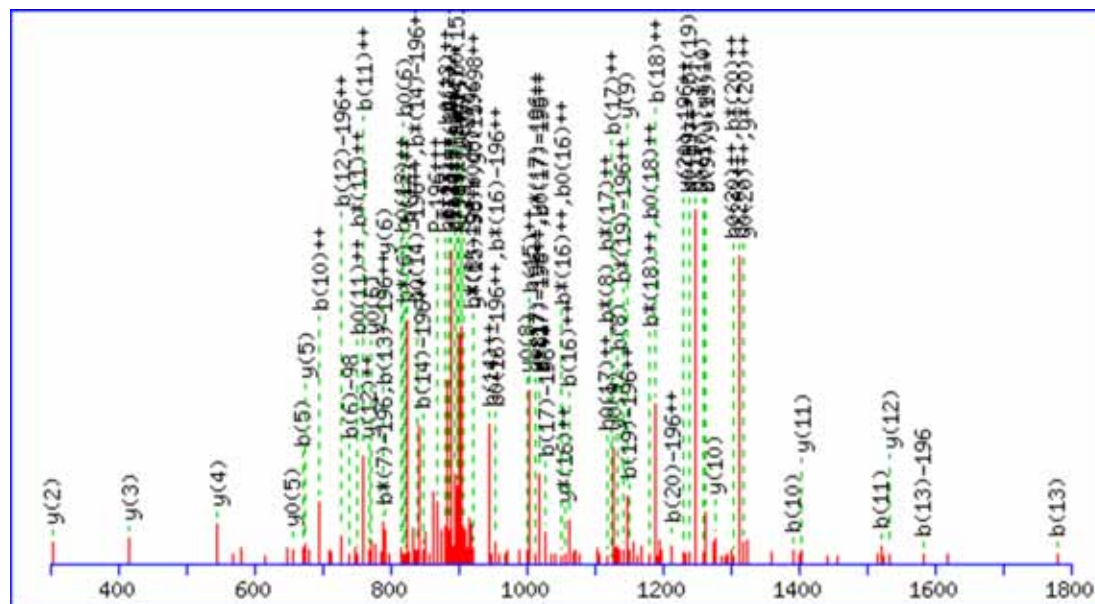

**Monoisotopic mass of neutral peptide Mr(calc):** 2796.0423

**Fixed modifications:** Carbamidomethyl (C) (apply to specified residues or termini only)

**Variable modifications:**

**N-term :** Dimethyl (N-term)

**S6 :** Phospho (ST), with neutral losses 0.0000(shown in table), 97.9769

**S7 :** Phospho (ST), with neutral losses 0.0000(shown in table), 97.9769

**Ions Score:** 86 **Expect:** 6.6e-008

**Matched b ions:** b(5), b(6)-98, b(7)-98, b(8), b(8)-98, b(9), b(10)++, b(10)-98++, b(10), b(10)-98, b(11)++, b(11), b(11)-98++, b(12)++, b(12)-196++, b(12)-98++, b(13)++, b(13), b(13)-196++, b(13)-196, b(13)-98++, b(14)++, b(14)-196++, b(14)-98++, b(15)++, b(15)-196++, b(15)-98++, b(16)++, b(17)++, b(17)-196++, b(17)-98++, b(18)++, b(18)-98++, b(19)++, b(19)-196++, b(19)-98++, b(20)++, b(20)-98++, b(20)-196++

**Matched y ions:** y(2), y(3), y(4), y(5), y(6), y(7), y(8), y(9), y(10), y(11), y(12), y(12)++, y(14)++, y(16)-98++, y(17)-98++, y(19)++, y(19)-98++, y(20)-196++

**Precursor origin neutral loss:** +

## Peptide No.523

**LGSFGSITR**

**Confirmed sites:** @S:3

**Ambiguous sites:**

**MS/MS Fragmentation of LGSFGSITR**

Found in **FLNC\_MOUSE**, Filamin-C OS=Mus musculus GN=Flnc PE=1 SV=3

Match to Query 558: 1044.500662 from(523.257607,2+)

Title: Elution from: 45.079 to 45.079 scan no 4135 cid35.00 polarity:+:MA10





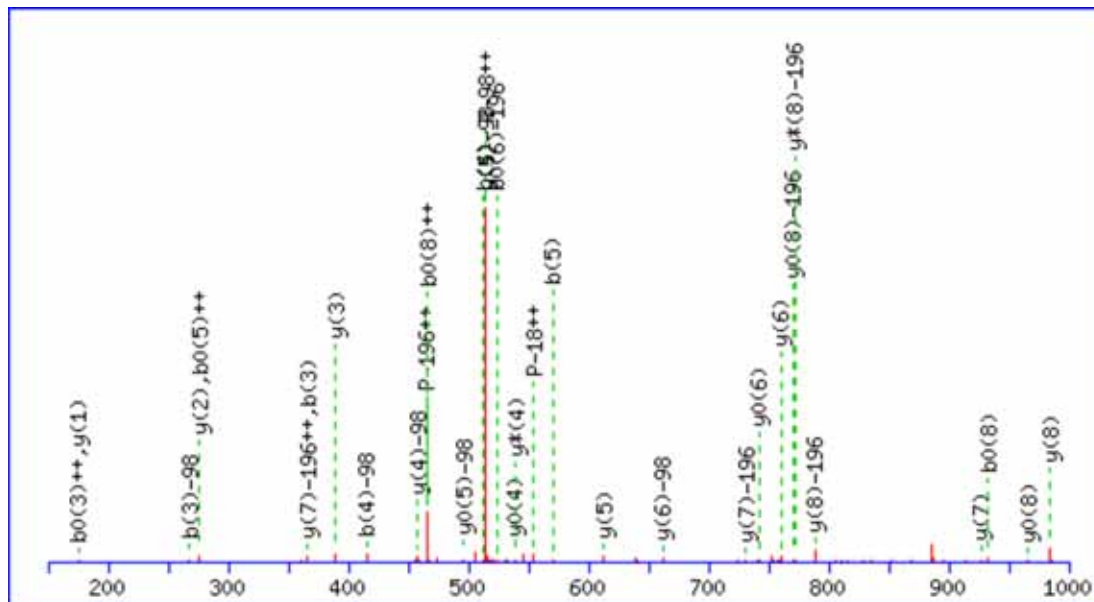

**Monoisotopic mass of neutral peptide Mr(calc):** 1124.4668

**Fixed modifications:** Carbamidomethyl (C) (apply to specified residues or termini only)

**Variable modifications:**

**N-term :** Dimethyl (N-term)

**S3 :** Phospho (ST), with neutral losses 97.9769(shown in table), 0.0000

**S6 :** Phospho (ST), with neutral losses 97.9769(shown in table), 0.0000

**Ions Score:** 34 **Expect:** 0.0058

**Matched b ions:** b(3)-98, b(3), b(4)-98, b(4), b(5), b(6)-98, b(7)-98, b(8)-98

**Matched y ions:** y(1), y(2), y(3), y(4)-98, y(5), y(5)-98, y(6), y(6)-98, y(7)-196++, y(7)-98++, y(7)-196, y(7)-98, y(7), y(8)-196, y(8)-98, y(8)

**Precursor origin neutral loss:** +

## Peptide No.525

**LGSFGSITR**

**Confirmed sites:** @S:3

**Ambiguous sites:**

MS/MS Fragmentation of **LGSFGSITR**

Found in **FLNC\_MOUSE**, Filamin-C OS=Mus musculus GN=Flnc PE=1 SV=3

Match to Query 585: 1050.532202 from(526.273377,2+)

Title: Elution from: 45.059 to 45.059 scan no 4132 cid35.00 polarity:+:MA10

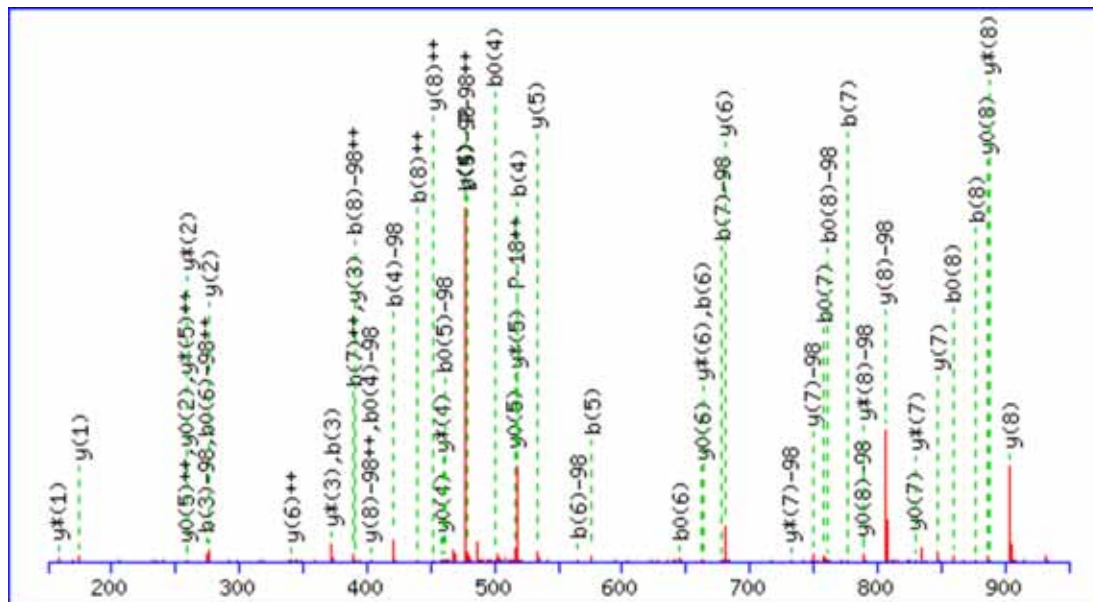

**Monoisotopic mass of neutral peptide Mr(calc):** 1050.5323

**Fixed modifications:** Carbamidomethyl (C) (apply to specified residues or termini only)

**Variable modifications:**

**N-term :** Dimethyl:2H(4)13C(2) (N-term)

**S3 :** Phospho (ST), with neutral losses 97.9769(shown in table), 0.0000

**Ions Score:** 48 **Expect:** 0.00047

**Matched b ions:** b(3)-98, b(3), b(4)-98, b(4), b(5), b(5)-98, b(6)-98, b(6), b(7)++, b(7)-98, b(7), b(8)-98, b(8)++, b(8)

**Matched y ions:** y(1), y(2), y(3), y(4), y(5), y(6), y(6)++, y(7)-98, y(7), y(8)-98, y(8), y(8)-98, y(8)++

**Precursor origin neutral loss:** +

## Peptide No.526

**LGSGFSITR**

**Confirmed sites:** @S:3,@S:6

**Ambiguous sites:**

**MS/MS Fragmentation of** **LGSGFSITR**

Found in **FLNC\_MOUSE**, Filamin-C OS=Mus musculus GN=Flnc PE=1 SV=3

Match to Query 648: 1130.499398 from(566.256975,2+)

Title: Elution from: 51.360 to 51.360 scan no 4824 cid35.00 polarity:+:MA10

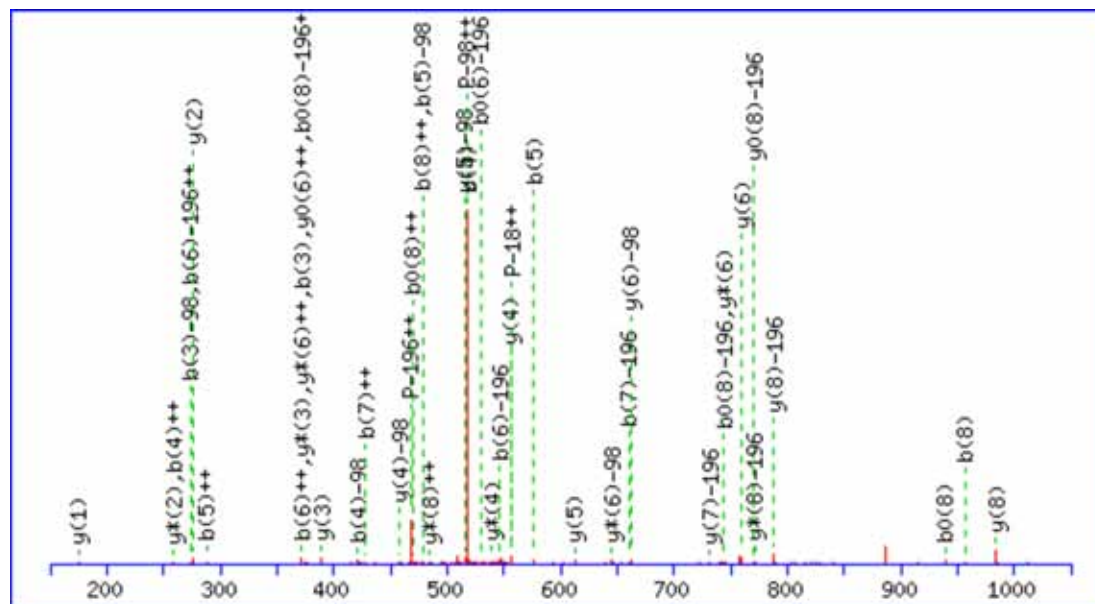

**Monoisotopic mass of neutral peptide Mr(calc):** 1130.4986

**Fixed modifications:** Carbamidomethyl (C) (apply to specified residues or termini only)

**Variable modifications:**

**N-term :** Dimethyl:2H(4)13C(2) (N-term)

**S3 :** Phospho (ST), with neutral losses 97.9769(shown in table), 0.0000

**S6 :** Phospho (ST), with neutral losses 97.9769(shown in table), 0.0000

**Ions Score:** 36 **Expect:** 0.0063

**Matched b ions:** b(3), b(3)-98, b(4)++, b(4)-98, b(4), b(5)++, b(5), b(5)-98, b(6)++, b(6)-98, b(6)-196++, b(6)-196, b(7)-98, b(7)-196, b(7)++, b(8), b(8)++

**Matched y ions:** y(1), y(2), y(3), y(4), y(4)-98, y(5), y(5)-98, y(6)-98, y(6), y(7)-196, y(7)-98, y(8)-196, y(8)-98, y(8)

**Precursor origin neutral loss:** +

## Peptide No.527

**LGSRPSIQEQSPLELR**

**Confirmed sites:** @S:3

**Ambiguous sites:**

MS/MS Fragmentation of **LGSRPSIQEQSPLELR**

Found in **XIRP1\_MOUSE**, Xin actin-binding repeat-containing protein 1 OS=Mus musculus GN=Xirp1 PE=1 SV=2

Match to Query 5164: 1916.973282 from(639.998370,3+)

Title: Elution from: 45.388 to 45.388 scan no 4350 cid35.00 polarity:+:MA10



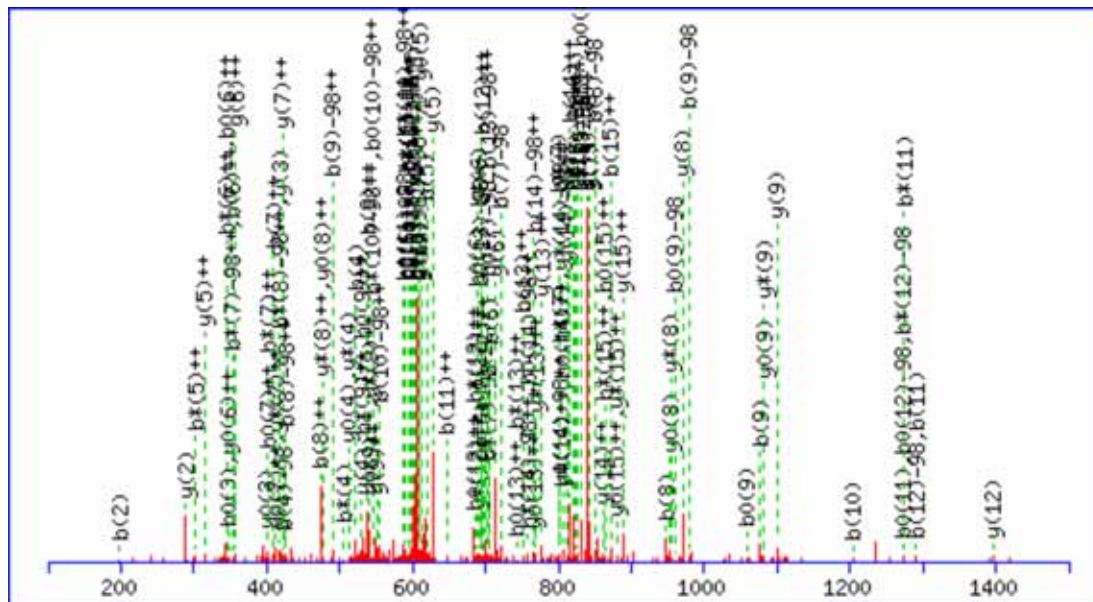

**Monoisotopic mass of neutral peptide Mr(calc):** 1916.9720

**Fixed modifications:** Carbamidomethyl (C) (apply to specified residues or termini only)

**Variable modifications:**

**N-term :** Dimethyl (N-term)

**S3 :** Phospho (ST), with neutral losses 97.9769(shown in table), 0.0000

**Ions Score:** 41 **Expect:** 0.0058

**Matched b ions:** b(2), b(4), b(4)-98, b(5), b(6)-98, b(6)++, b(6), b(7)-98, b(7), b(7)++, b(8)++, b(8), b(8)-98++, b(8)-98, b(9)++, b(9), b(9)-98++, b(9)-98, b(10)++, b(10), b(10)-98++, b(11), b(11)-98++, b(11)++, b(12)-98, b(12)++, b(13)-98++, b(13)++, b(14)++, b(14)-98++, b(15)++, b(15)-98++

**Matched y ions:** y(2), y(3), y(4), y(5)++, y(5), y(6), y(6)++, y(7), y(7)++, y(8), y(9), y(9)++, y(10)++, y(12), y(12)++, y(13)++, y(14)-98++, y(14)++, y(15)-98++, y(15)++

**Precursor origin neutral loss:** +

## Peptide No.528

**LGSRPSIQEQSPLELR**

**Confirmed sites:** @S:3,@S:6

**Ambiguous sites:**

**MS/MS Fragmentation of LGSRPSIQEQSPLELR**

Found in **XIRP1\_MOUSE**, Xin actin-binding repeat-containing protein 1 OS=Mus musculus GN=Xirp1 PE=1 SV=2

**Match to Query 4965:** 1996.938870 from(666.653566,3+)

**Title:** Elution from: 49.287 to 49.287 scan no 4601 cid35.00 polarity:+:MA10



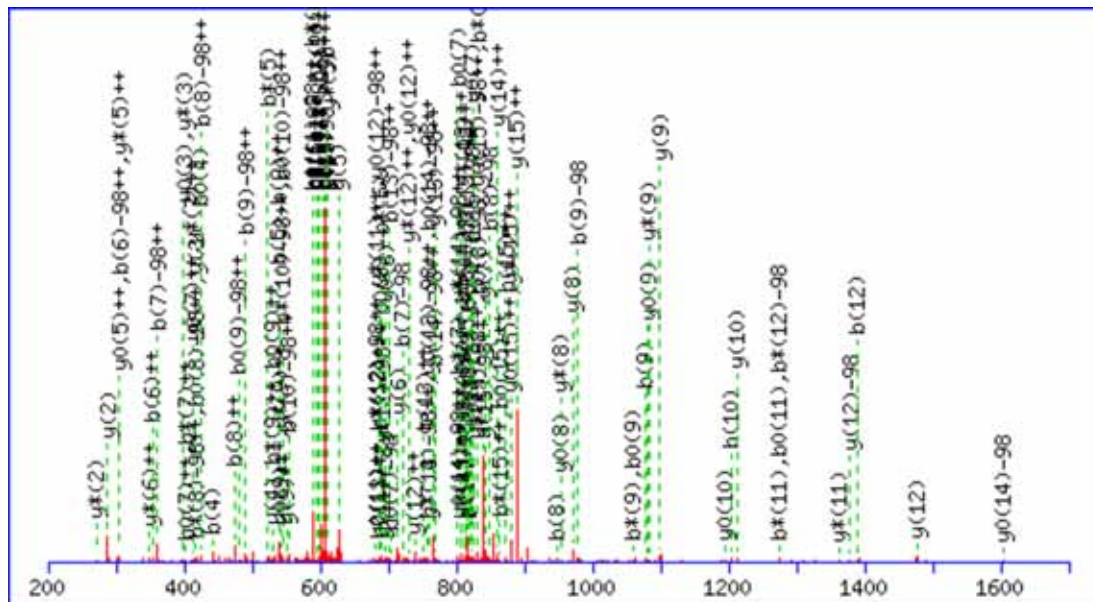

**Monoisotopic mass of neutral peptide Mr(calc):** 1916.9720

**Fixed modifications:** Carbamidomethyl (C) (apply to specified residues or termini only)

**Variable modifications:**

**N-term :** Dimethyl (N-term)

**S6 :** Phospho (ST), with neutral losses 97.9769(shown in table), 0.0000

**Ions Score:** 44 **Expect:** 0.0025

**Matched b ions:** b(4), b(5), b(6)-98, b(6)-98++, b(6)++, b(7)-98++, b(7)-98, b(7), b(8)-98++, b(8)++, b(8)-98, b(8), b(9)++, b(9), b(9)-98++, b(9)-98, b(10), b(10)-98++, b(10)++, b(11)-98++, b(12), b(13)++, b(13)-98++, b(14)-98++, b(14)++, b(15)-98++, b(15)++

**Matched y ions:** y(2), y(3), y(4), y(5), y(6), y(7), y(8), y(9), y(9)++, y(10), y(10)++, y(11)++, y(12), y(12)-98, y(12)++, y(12)-98++, y(13)++, y(13)-98++, y(14)++, y(14)-98++, y(15)-98++, y(15)++

**Precursor origin neutral loss:** +

## Peptide No.530

**LGSRPSIQEQSPLELR**

**Confirmed sites:** @S:3

**Ambiguous sites:**

**MS/MS Fragmentation of LGSRPSIQEQSPLELR**

Found in **XIRP1\_MOUSE**, Xin actin-binding repeat-containing protein 1 OS=Mus musculus GN=Xirp1 PE=1 SV=2

Match to Query 4555: 1923.006741 from(642.009523,3+)

Title: Elution from: 45.795 to 45.795 scan no 4200 cid35.00 polarity:+:MA10:m1s

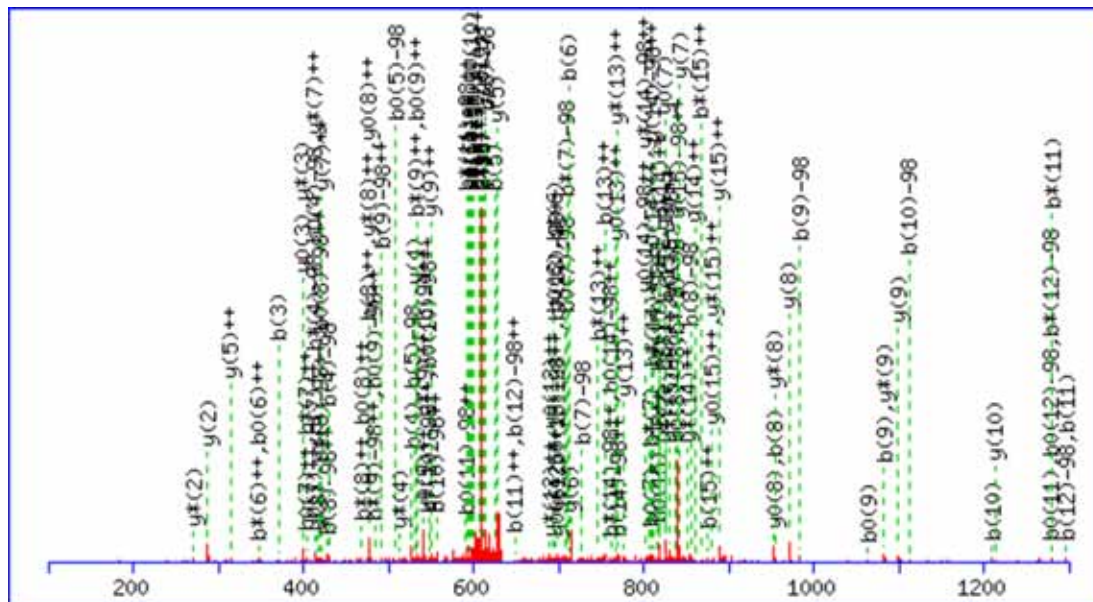

**Monoisotopic mass of neutral peptide Mr(calc):** 1923.0039

**Fixed modifications:** Carbamidomethyl (C) (apply to specified residues or termini only)

**Variable modifications:**

**N-term :** Dimethyl:2H(4)13C(2) (N-term)

**S3 :** Phospho (ST), with neutral losses 0.0000(shown in table), 97.9769

**Ions Score:** 38 **Expect:** 0.0099

**Matched b ions:** b(3), b(4), b(4)-98, b(5)-98, b(5), b(6)-98, b(6), b(7)++, b(7), b(7)-98, b(8)++, b(8), b(8)-98++, b(8)-98, b(9)++, b(9), b(9)-98, b(9)-98++, b(10), b(10)-98++, b(10)-98, b(10)++, b(11), b(11)-98++, b(11)++, b(12)-98, b(12)++, b(12)-98++, b(13)++, b(14)++, b(14)-98++, b(15)-98++, b(15)++  
**Matched y ions:** y(2), y(3), y(4), y(5), y(5)++, y(6), y(7), y(7)++, y(8), y(9), y(9)++, y(10), y(10)++, y(12)++, y(13)++, y(14)-98++, y(14)++, y(15)-98++, y(15)++  
**Precursor origin neutral loss:** +

## Peptide No.531

**LGSRPSIQEQSPLELR**

**Confirmed sites:** @S:3,@S:6

**Ambiguous sites:**

**MS/MS Fragmentation of LGSRPSIQEQSPLELR**

Found in **XIRP1\_MOUSE**, Xin actin-binding repeat-containing protein 1 OS=Mus musculus GN=Xirp1 PE=1 SV=2

**Match to Query 6502:** 2002.970128 from(1002.492340,2+)

**Title:** Elution from: 49.098 to 49.098 scan no 4847 cid35.00 polarity:+:MA10:m1s



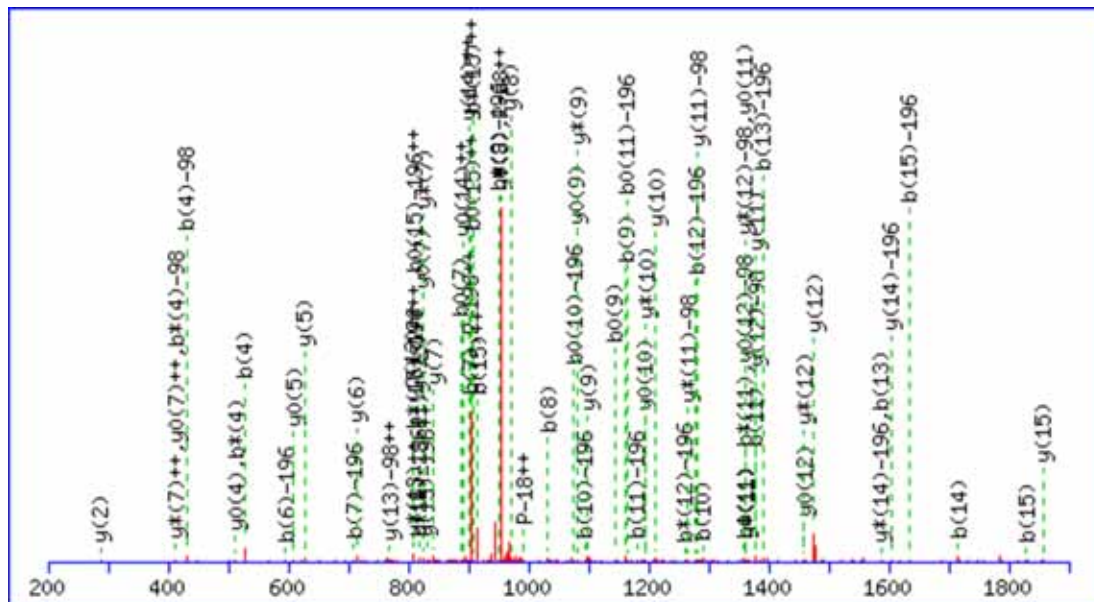

**Monoisotopic mass of neutral peptide Mr(calc):** 2002.9702

**Fixed modifications:** Carbamidomethyl (C) (apply to specified residues or termini only)

**Variable modifications:**

**N-term :** Dimethyl:2H(4)13C(2) (N-term)

**S3 :** Phospho (ST), with neutral losses 0.0000(shown in table), 97.9769

**S6 :** Phospho (ST), with neutral losses 0.0000(shown in table), 97.9769

**Ions Score:** 55 **Expect:** 0.00023

**Matched b ions:** b(4)-98, b(4), b(6)-196, b(6)-98, b(7)-98, b(7), b(7)-196, b(8), b(8)-98, b(9), b(9)-98, b(10)-98, b(10), b(10)-98++, b(10)-196, b(11), b(11)-98, b(11)-196, b(12)-196, b(12)-98, b(13), b(13)-98, b(13)-196, b(14)-98, b(14), b(15)-196++, b(15)-196, b(15), b(15)-98, b(15)-98++, b(15)++

**Matched y ions:** y(2), y(5), y(6), y(7), y(8), y(9), y(10), y(11), y(11)-98, y(12)-98, y(12), y(13)++, y(13)-98++, y(14)-98++, y(14)-196, y(14)++, y(15), y(15)-98, y(15)-196++

**Precursor origin neutral loss:** +

## Peptide No.532

**LGSRPSIQEQSPLELR**

**Confirmed sites:** @S:6

**Ambiguous sites:**

**MS/MS Fragmentation of** **LGSRPSIQEQSPLELR**

Found in **XIRP1\_MOUSE**, Xin actin-binding repeat-containing protein 1 OS=Mus musculus GN=Xirp1 PE=1 SV=2

Match to Query 6079: 1923.005994 from(642.009274,3+)

Title: Elution from: 45.662 to 45.662 scan no 4394 cid35.00 polarity:+:MA10:m1s

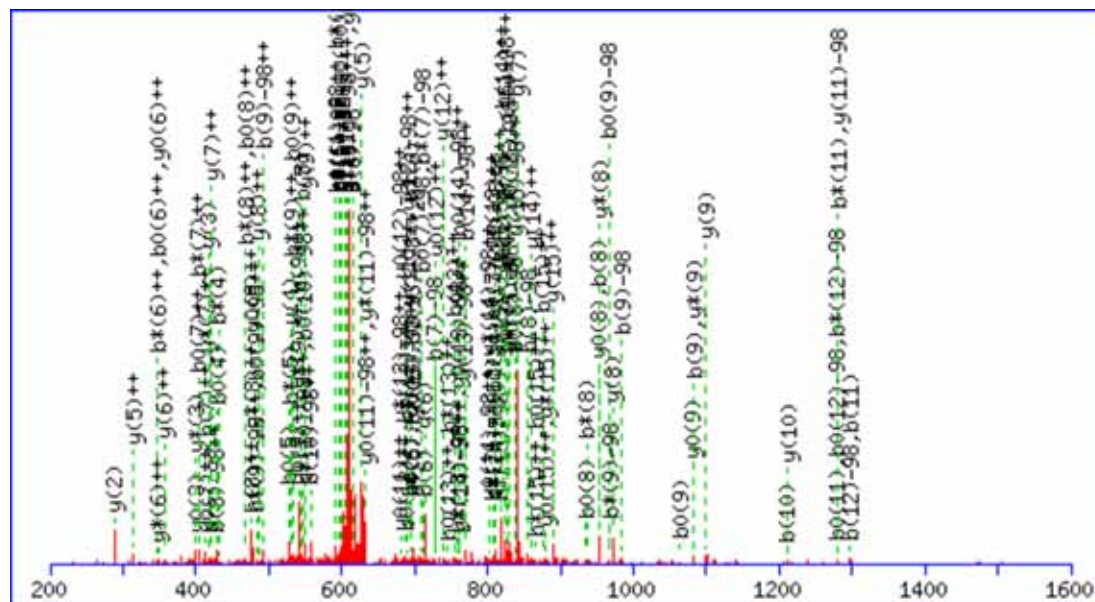

**Monoisotopic mass of neutral peptide Mr(calc):** 1923.0039

**Fixed modifications:** Carbamidomethyl (C) (apply to specified residues or termini only)

**Variable modifications:**

**N-term :** Dimethyl:2H(4)13C(2) (N-term)

**S6 :** Phospho (ST), with neutral losses 97.9769(shown in table), 0.0000

**Ions Score:** 34 **Expect:** 0.027

**Matched b ions:** b(5), b(6)-98, b(6), b(7), b(7)++, b(7)-98, b(8)-98++, b(8)++, b(8), b(8)-98, b(9), b(9)-98++, b(9)-98, b(9)++, b(10), b(10)++, b(10)-98++, b(11), b(11)-98++, b(12)-98, b(13)++, b(14)++, b(14)-98++, b(15)-98++, b(15)++

**Matched y ions:** y(2), y(3), y(4), y(5)++, y(5), y(6), y(6)++, y(7), y(7)++, y(8), y(8)++, y(9), y(9)++, y(10), y(10)++, y(11)-98, y(11)++, y(12)-98++, y(12)++, y(13)-98++, y(13)++, y(14)-98++, y(14)++, y(15)-98++, y(15)++

**Precursor origin neutral loss:** +

## Peptide No.533

**LHGGFDSDCSEEDGEALNGEPELDLTSK**

**Confirmed sites:** @S:7,@S:10

**Ambiguous sites:**

**MS/MS Fragmentation of LHGGFDSDCSEEDGEALNGEPELDLTSK**

Found in **GTPB1\_MOUSE**, GTP-binding protein 1 OS=Mus musculus GN=Gtpbp1 PE=1 SV=2

Match to Query 8624: 3107.237943 from(1036.753257,3+)

Title: Elution from: 57.247 to 57.247 scan no 5682 cid35.00 polarity:+:MA10:m1s

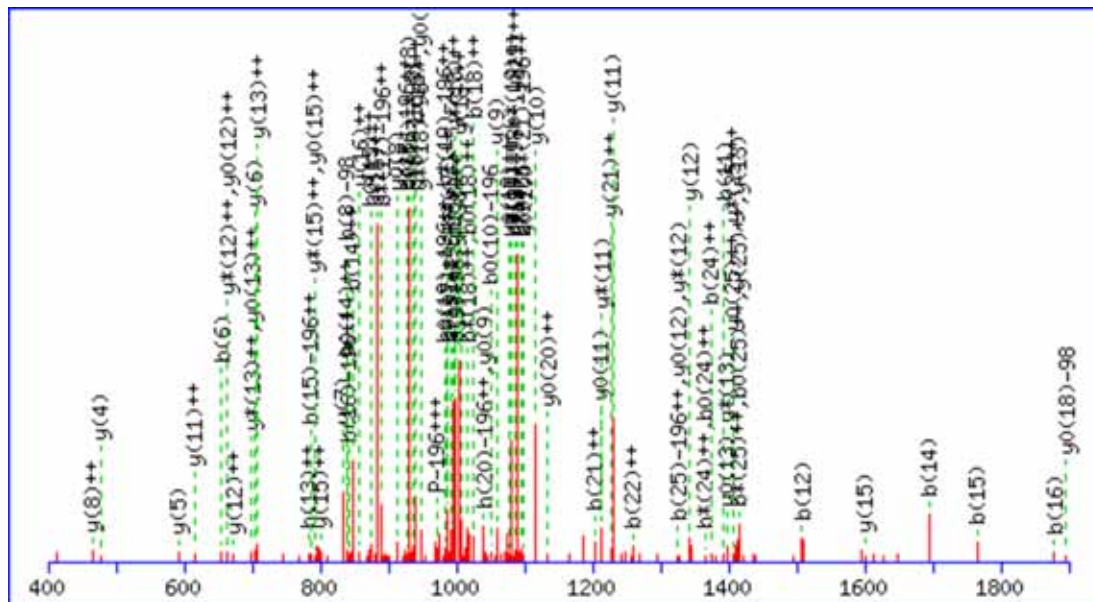

**Monoisotopic mass of neutral peptide Mr(calc):** 3107.2356

**Fixed modifications:** Carbamidomethyl (C) (apply to specified residues or termini only)

**Variable modifications:**

**N-term :** Dimethyl (N-term)

**S7 :** Phospho (ST), with neutral losses 0.0000(shown in table), 97.9769

**S10 :** Phospho (ST), with neutral losses 0.0000(shown in table), 97.9769

**K27 :** Dimethyl (K)

**Ions Score:** 62 **Expect:** 3.3e-005

**Matched b ions:** b(6), b(8)-98, b(8), b(9)-98, b(9), b(10)-98, b(11), b(11)-98, b(12)-98, b(12), b(13)++, b(14)-98, b(14), b(14)-98++, b(14)++, b(15)++, b(15), b(15)-98++, b(15)-196++, b(16), b(16)-98++, b(16)++, b(16)-196++, b(17)++, b(17)-98++, b(18)++, b(18)-196++, b(18)-98++, b(19)++, b(19)-98++, b(19)-196++, b(20)-98++, b(20)-196++, b(21)++, b(22)++, b(24)++, b(25)-196++

**Matched y ions:** y(4), y(5), y(6), y(7), y(8)++, y(8), y(9), y(10), y(11), y(11)++, y(12), y(12)++, y(13)++, y(13), y(15)++, y(15), y(16)++, y(18)++, y(19)++, y(21)++, y(25)++, y(26)-98++

**Precursor origin neutral loss:** +

## Peptide No.534

**LHGGFDSDCSEEDGEALNGEPELDLTSK**

**Confirmed sites:** @S:7,@S:10

**Ambiguous sites:**

**MS/MS Fragmentation of LHGGFDSDCSEEDGEALNGEPELDLTSK**

Found in **GTPB1\_MOUSE**, GTP-binding protein 1 OS=Mus musculus GN=Gtpbp1 PE=1 SV=2

Match to Query 8896: 3119.300298 from(1040.774042,3+)

Title: Elution from: 56.881 to 56.881 scan no 5694 cid35.00 polarity:+:MA10:m1s

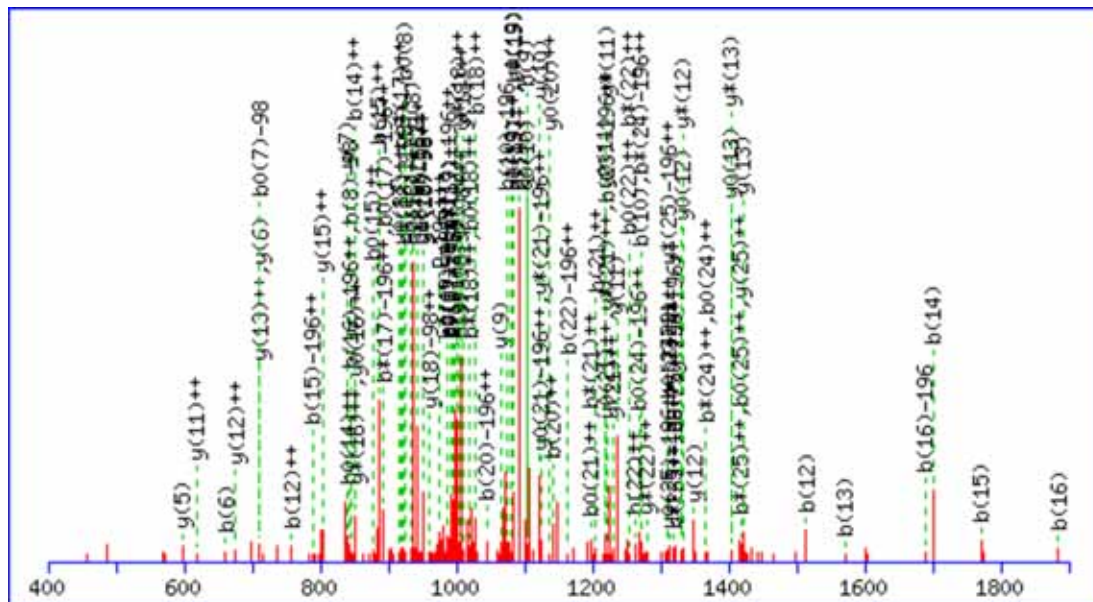

**Monoisotopic mass of neutral peptide Mr(calc):** 3119.2992

**Fixed modifications:** Carbamidomethyl (C) (apply to specified residues or termini only)

**Variable modifications:**

**N-term :** Dimethyl:2H(4)13C(2) (N-term)

**S7 :** Phospho (ST), with neutral losses 0.0000(shown in table), 97.9769

**S10 :** Phospho (ST), with neutral losses 0.0000(shown in table), 97.9769

**K27 :** Dimethyl:2H(4)13C(2) (K)

**Ions Score:** 39 **Expect:** 0.0087

**Matched b ions:** b(6), b(8), b(8)-98, b(9)-98, b(9), b(10), b(10)-98, b(10)-196, b(11)-98, b(12), b(12)-98, b(12)-98++, b(12)++, b(13), b(13)-98++, b(14)-98, b(14), b(14)++, b(14)-98++, b(15)-98++, b(15), b(15)++, b(15)-196++, b(16), b(16)++, b(16)-196, b(16)-98++, b(16)-196++, b(17)++, b(17)-98++, b(18)++, b(18)-98++, b(19)++, b(19)-196++, b(19)-98++, b(20)-98++, b(20)-196++, b(20)++, b(21)++, b(22)++, b(22)-196++, b(23)-98++, b(23)++, b(23)-196++

**Matched y ions:** y(5), y(6), y(7), y(8), y(9), y(10), y(11), y(11)++, y(12), y(12)++, y(13), y(13)++, y(15)++, y(18)-98++, y(18)++, y(21)++, y(23)-98++, y(25)++, y(25)-196++

**Precursor origin neutral loss:** +

## Peptide No.535

**LKFSDEEDGRDSDEEGAEGHK**

**Confirmed sites:** @S:4,@S:12

**Ambiguous sites:**

MS/MS Fragmentation of **LKFSDEEDGRDSDEEGAEGHK**

Found in **PRC2A\_MOUSE**, Protein PRRC2A OS=Mus musculus GN=Prrc2a PE=1 SV=1

Match to Query 7849: 2593.028756 from(649.264465,4+)

Title: Elution from: 31.927 to 31.927 scan no 2569 cid35.00 polarity:+:MA10:m1s



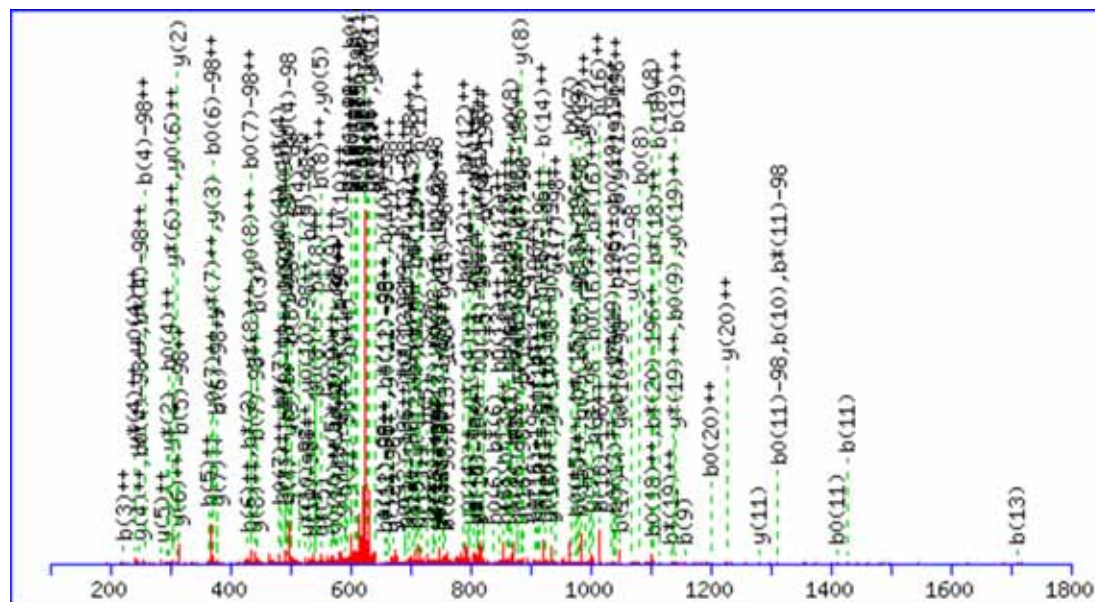

**Monoisotopic mass of neutral peptide Mr(calc):** 2593.0258

**Fixed modifications:** Carbamidomethyl (C) (apply to specified residues or termini only)

**Variable modifications:**

**N-term :** Dimethyl (N-term)

**K2 :** Dimethyl (K)

**S4 :** Phospho (ST), with neutral losses 0.0000(shown in table), 97.9769

**S12 :** Phospho (ST), with neutral losses 0.0000(shown in table), 97.9769

**K21 :** Dimethyl (K)

**Ions Score:** 46 **Expect:** 0.0011

**Matched b ions:** b(3)++, b(3), b(4)-98++, b(4)-98, b(4), b(5)-98++, b(5)++, b(5)-98, b(5), b(6), b(6)++, b(6)-98++, b(6)-98, b(7)++, b(7), b(7)-98++, b(7)-98, b(8), b(8)++, b(8)-98, b(8)-98++, b(9)-98++, b(9)++, b(9), b(10), b(10)-98++, b(10)++, b(11), b(11)++, b(11)-98++, b(12)-196++, b(12)-98++, b(12)++, b(13)++, b(13), b(13)-98++, b(13)-196++, b(14)-98++, b(14)++, b(14)-196++, b(15)++, b(15)-98++, b(15)-196++, b(16)++, b(16)-98++, b(16)-196++, b(17)++, b(17)-98++, b(18)-196++, b(18)++, b(19)++, b(19)-98++

**Matched y ions:** y(2), y(3), y(4), y(4)++, y(5)++, y(5), y(6)++, y(6), y(7)++, y(7), y(8)++, y(8), y(9), y(9)++, y(10)++, y(10)-98++, y(10)-98, y(11), y(11)-98++, y(11)++, y(12)-98++, y(12)++, y(13)++, y(13)-98++, y(14)++, y(14)-98++, y(15)++, y(15)-98++, y(16)-98++, y(16)++, y(17)-98++, y(17)++, y(18)-196++, y(19)-98++, y(20)++

**Precursor origin neutral loss:** +

## Peptide No.536

**LKFSDEEDGRDSDEEGAEGHK**

**Confirmed sites:** @S:4,@S:12

**Ambiguous sites:**

MS/MS Fragmentation of **LKFSDEEDGRDSDEEGAEGHK**

Found in **PRC2A\_MOUSE**, Protein PRRC2A OS=Mus musculus GN=Prrc2a PE=1 SV=1

Match to Query 6857: 2611.122780 from(653.787971,4+)

Title: Elution from: 31.680 to 31.680 scan no 2330 cid35.00 polarity:+:MA10:m1s

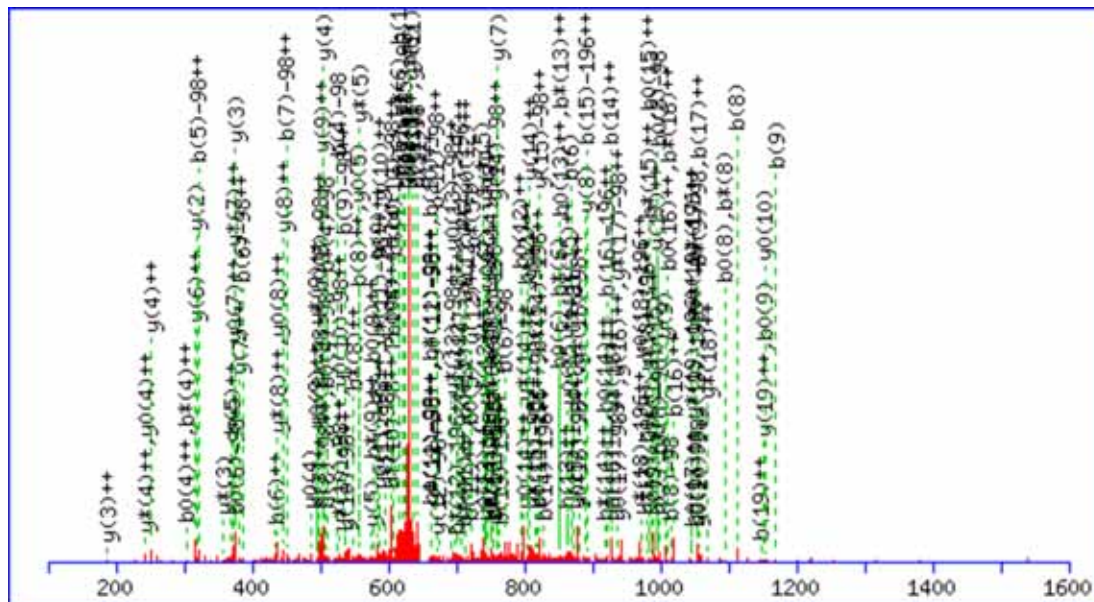

**Monoisotopic mass of neutral peptide Mr(calc):** 2611.1212

**Fixed modifications:** Carbamidomethyl (C) (apply to specified residues or termini only)

**Variable modifications:**

**N-term :** Dimethyl:2H(4)13C(2) (N-term)

**K2 :** Dimethyl:2H(4)13C(2) (K)

**S4 :** Phospho (ST), with neutral losses 0.0000(shown in table), 97.9769

**S12 :** Phospho (ST), with neutral losses 0.0000(shown in table), 97.9769

**K21 :** Dimethyl:2H(4)13C(2) (K)

**Ions Score:** 33 **Expect:** 0.035

**Matched b ions:** b(4), b(4)-98, b(5), b(5)-98++, b(5)-98, b(5)++, b(6)-98, b(6)++, b(6)-98++, b(6), b(7)++, b(7)-98++, b(7), b(8), b(8)-98++, b(8)++, b(8)-98, b(9)++, b(9)-98++, b(9), b(10)-98++, b(10)++, b(11)++, b(11)-98++, b(12)-196++, b(12)-98++, b(12)++, b(13)-98++, b(13)-196++, b(13)++, b(14)++, b(14)-98++, b(14)-196++, b(15)++, b(15)-98++, b(15)-196++, b(16)++, b(16)-98++, b(16)-196++, b(17)++, b(17)-98++, b(18)-98++, b(19)++

**Matched y ions:** y(2), y(3), y(3)++, y(4)++, y(4), y(5), y(6)++, y(6), y(7)++, y(7), y(8)++, y(8), y(9), y(9)++, y(10)-98++, y(10)++, y(11)-98++, y(11)++, y(12)-98++, y(12)++, y(13)++, y(13)-98++, y(14)++, y(14)-98++, y(15)-98++, y(15)++, y(16)++, y(17)++, y(18)-196++, y(19)++, y(19)-196++

**Precursor origin neutral loss:** +

## Peptide No.537

**LKSLSTK**

**Confirmed sites:** @T:7

**Ambiguous sites:**

**MS/MS Fragmentation of LKSLSTK**

Found in **BICD2\_MOUSE**, Protein bicaudal D homolog 2 OS=Mus musculus GN=Bicd2 PE=1 SV=1

Match to Query 543: 1024.592982 from(342.538270,3+)

Title: Elution from: 27.666 to 27.666 scan no 1984 cid35.00 polarity:+:MA10

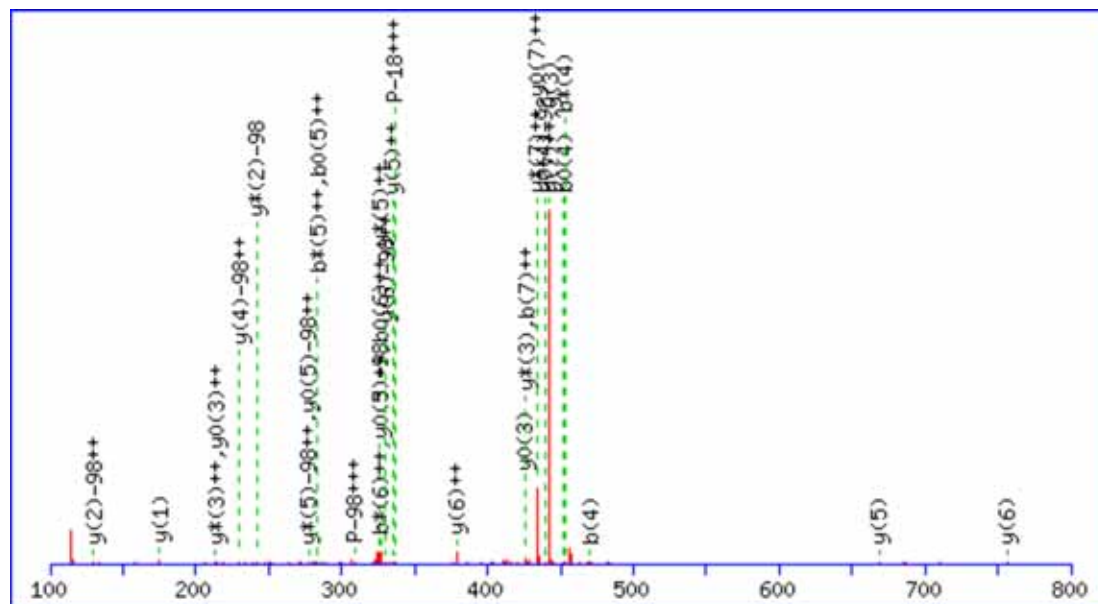

**Monoisotopic mass of neutral peptide Mr(calc):** 1024.5933

**Fixed modifications:** Carbamidomethyl (C) (apply to specified residues or termini only)

**Variable modifications:**

**N-term :** Dimethyl (N-term)

**T7 :** Phospho (ST), with neutral losses 0.0000(shown in table), 97.9769

**K8 :** Dimethyl (K)

**Ions Score:** 27 **Expect:** 0.043

**Matched b ions:** b(4), b(7)++

**Matched y ions:** y(1), y(2)-98++, y(3), y(4)-98++, y(5), y(5)++, y(6)++, y(6), y(6)-98++, y(7)++

**Precursor origin neutral loss:**

## Peptide No.538

**LLQGLLGSDDEEQEDPK**

**Confirmed sites:** @S:8

**Ambiguous sites:**

MS/MS Fragmentation of **LLQGLLGSDDEEQEDPK**

Found in **SRPK3\_MOUSE**, Serine/threonine-protein kinase SRPK3 OS=Mus musculus GN=Srpk3 PE=2 SV=1

Match to Query 5715: 2020.924542 from(674.648790,3+)

Title: Elution from: 51.473 to 51.473 scan no 5084 cid35.00 polarity:+:MA10:m1s

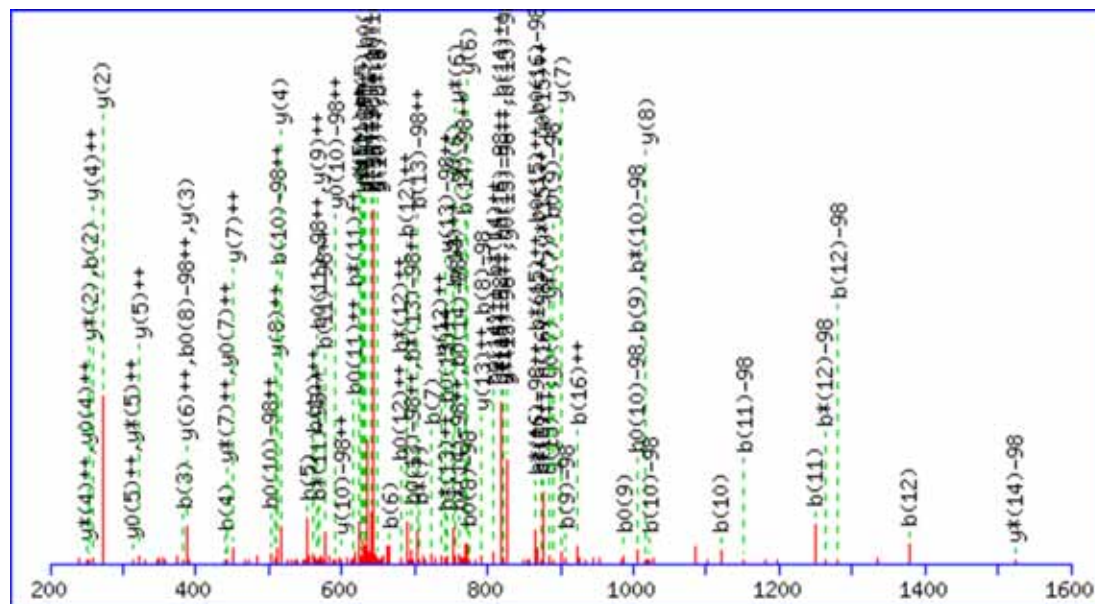

**Monoisotopic mass of neutral peptide Mr(calc):** 2020.9242

**Fixed modifications:** Carbamidomethyl (C) (apply to specified residues or termini only)

**Variable modifications:**

**N-term :** Dimethyl (N-term)

**S8 :** Phospho (ST), with neutral losses 97.9769(shown in table), 0.0000

**K17 :** Dimethyl (K)

**Ions Score:** 46 **Expect:** 0.0019

**Matched b ions:** b(2), b(3), b(4), b(5), b(6), b(7), b(8)-98, b(9), b(9)-98, b(10), b(10)-98++, b(10)-98, b(10)++, b(11)-98, b(11), b(11)++, b(11)-98++, b(12), b(12)-98++, b(12)++, b(12)-98, b(13)++, b(13)-98++, b(14)++, b(14)-98++, b(15)++, b(15)-98++, b(16)-98++, b(16)++

**Matched y ions:** y(2), y(3), y(4), y(4)++, y(5)++, y(5), y(6)++, y(6), y(7)++, y(7), y(8), y(8)++, y(9)++, y(10)-98++, y(10)++, y(11)-98++, y(12)++, y(13)-98++, y(13)++, y(14)++, y(15)++

**Precursor origin neutral loss:** +

## Peptide No.539

**LPDSPALAK**

**Confirmed sites:** @S:4

**Ambiguous sites:**

**MS/MS Fragmentation of LPDSPALAK**

Found in **STIM1\_MOUSE**, Stromal interaction molecule 1 OS=Mus musculus GN=Stim1 PE=1 SV=1

Match to Query 598: 1046.541572 from(524.278062,2+)

Title: Elution from: 32.504 to 32.504 scan no 2647 cid35.00 polarity:+:MA10



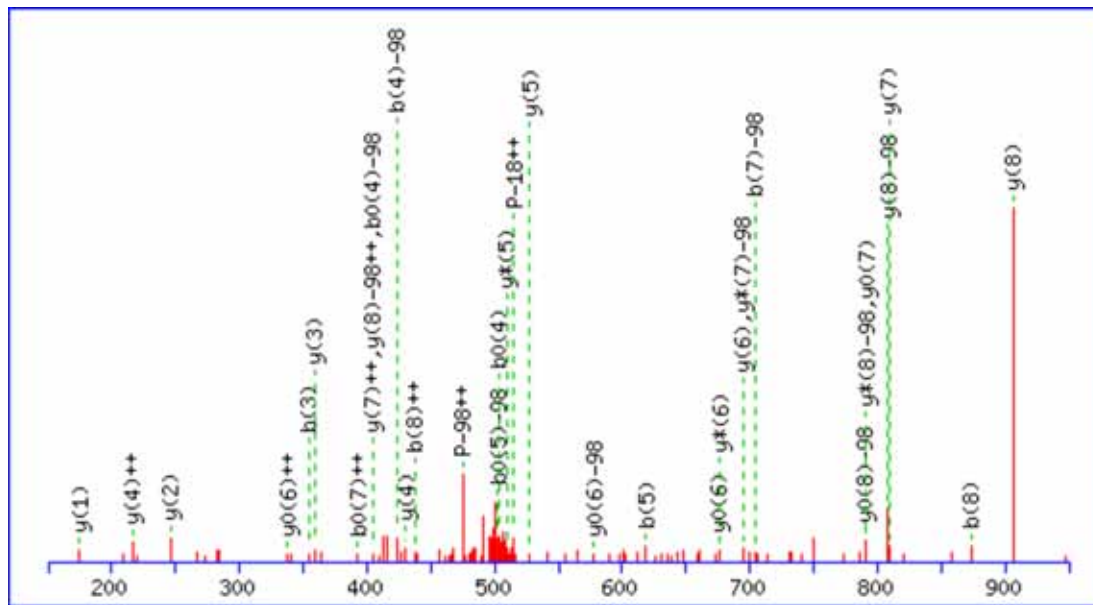

**Monoisotopic mass of neutral peptide Mr(calc):** 1046.5413

**Fixed modifications:** Carbamidomethyl (C) (apply to specified residues or termini only)

**Variable modifications:**

**N-term :** Dimethyl (N-term)

**S4 :** Phospho (ST), with neutral losses 0.0000(shown in table), 97.9769

**K9 :** Dimethyl (K)

**Ions Score:** 29 **Expect:** 0.037

**Matched b ions:** b(3), b(4)-98, b(5), b(7)-98, b(8), b(8)++

**Matched y ions:** y(1), y(2), y(3), y(4)++, y(4), y(5), y(6), y(7), y(7)++, y(8)-98, y(8), y(8)-98++

**Precursor origin neutral loss:** +

## Peptide No.540

**LQRPKEESSEDENEVSNILR**

**Confirmed sites:** @S:8,@S:9

**Ambiguous sites:**

**MS/MS Fragmentation of LQRPKEESSEDENEVSNILR**

Found in **OTUD4\_MOUSE**, OTU domain-containing protein 4 OS=Mus musculus GN=Otud4 PE=1 SV=1

Match to Query 6865: 2587.158096 from(863.393308,3+)

Title: Elution from: 44.836 to 44.836 scan no 4078 cid35.00 polarity:+:MA10:m1s

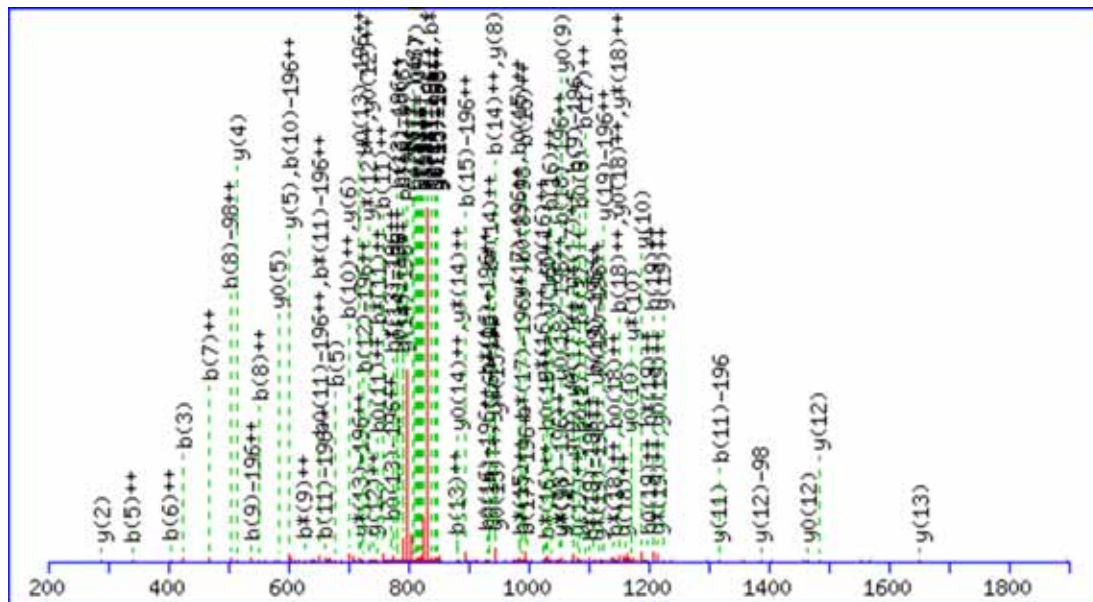

**Monoisotopic mass of neutral peptide Mr(calc):** 2587.1567

**Fixed modifications:** Carbamidomethyl (C) (apply to specified residues or termini only)

**Variable modifications:**

**N-term :** Dimethyl (N-term)

**K5 :** Dimethyl (K)

**S8 :** Phospho (ST), with neutral losses 0.0000(shown in table), 97.9769

**S9 :** Phospho (ST), with neutral losses 0.0000(shown in table), 97.9769

**Ions Score:** 56 **Expect:** 0.00018

**Matched b ions:** b(3), b(5)++, b(5), b(6)++, b(6), b(7)++, b(8)-98++, b(8)++, b(9)-196++, b(9)-196, b(10)-196++, b(10)-98++, b(10)++, b(11)++, b(11)-196++, b(11)-98++, b(11)-196, b(12)-98++, b(12)++, b(12)-196++, b(13)-98++, b(13)-196++, b(13)++, b(14)++, b(14)-98++, b(14)-196++, b(15)-98++, b(15)++, b(15)-196++, b(16)-98++, b(16)++, b(17)-196++, b(17)-98++, b(17)++, b(18)++, b(18)-98++, b(18)-196++, b(19)++, b(19)-98++, b(19)-196++

**Matched y ions:** y(2), y(4), y(5), y(6), y(7), y(8), y(9), y(10), y(11), y(12)-98, y(12), y(12)++, y(13)-98, y(13), y(13)++, y(14)-196++, y(14)-98++, y(15)-98++, y(16)++, y(16)-98++, y(16)-196++, y(17)-98++, y(17)-196++, y(17)++, y(18)++, y(18)-98++, y(19)-98++, y(19)-196++, y(19)++

**Precursor origin neutral loss:** +

## Peptide No.541

**LQRPKEESSEDENEVSNILR**

**Confirmed sites:** @S:8,@S:9

**Ambiguous sites:**

MS/MS Fragmentation of **LQRPKEESSEDENEVSNILR**

Found in **OTUD4\_MOUSE**, OTU domain-containing protein 4 OS=Mus musculus GN=Otud4 PE=1 SV=1

Match to Query 6345: 2599.223319 from(867.415049,3+)

Title: Elution from: 44.667 to 44.667 scan no 3954 cid35.00 polarity:+:MA10:m1s

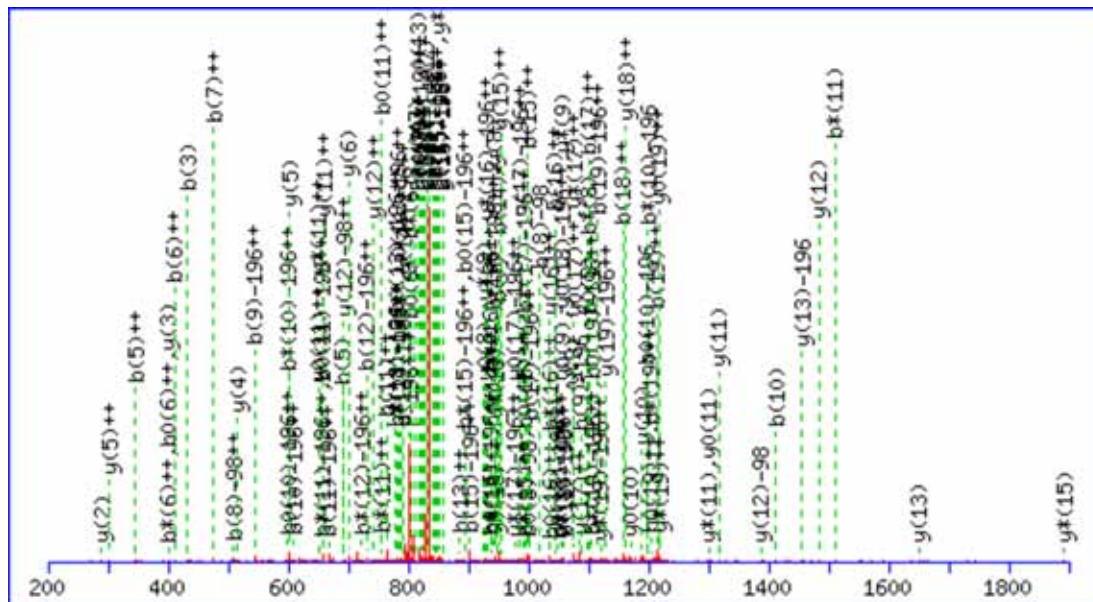

**Monoisotopic mass of neutral peptide Mr(calc):** 2599.2204

**Fixed modifications:** Carbamidomethyl (C) (apply to specified residues or termini only)

**Variable modifications:**

**N-term :** Dimethyl:2H(4)13C(2) (N-term)

**K5 :** Dimethyl:2H(4)13C(2) (K)

**S8 :** Phospho (ST), with neutral losses 0.0000(shown in table), 97.9769

**S9 :** Phospho (ST), with neutral losses 0.0000(shown in table), 97.9769

**Ions Score:** 42 **Expect:** 0.0055

**Matched b ions:** b(3), b(5)++, b(5), b(6)++, b(6), b(7)++, b(7), b(8)-98++, b(8)-98, b(9)-196++, b(9)-98++, b(9)-196, b(9)-98, b(10)-98++, b(10), b(10)-196++, b(11)++, b(11)-196++, b(11)-98++, b(11)-98, b(12)++, b(12)-196++, b(12)-98++, b(13)-196++, b(13)-98++, b(13)++, b(14)-98++, b(14)++, b(14)-196++, b(15)-196++, b(15)++, b(15)-98++, b(16)-196++, b(16)-98++, b(16)++, b(17)-196++, b(17)++, b(18)++, b(18)-196++, b(18)-98++, b(19)++, b(19)-196++, b(19)-98++

**Matched y ions:** y(2), y(3), y(4), y(5), y(5)++, y(6), y(7), y(8), y(9), y(10), y(11), y(11)++, y(12)-98, y(12), y(12)-98++, y(12)++, y(13), y(13)-98, y(13)-196, y(13)++, y(14)-98++, y(14)-196++, y(15)-196++, y(15)-98++, y(15)++, y(16)++, y(16)-98++, y(17)++, y(17)-98++, y(17)-196++, y(18)++, y(19)-98++, y(19)-196++

**Precursor origin neutral loss:** +

## Peptide No.542

**LQSIGTENENR**

**Confirmed sites:** @S:3

**Ambiguous sites:**

**MS/MS Fragmentation of LQSIGTENENR**

Found in **ALDOA\_MOUSE**, Fructose-bisphosphate aldolase A OS=Mus musculus GN=Aldoa PE=1 SV=2

Match to Query 3088: 1597.699006 from(799.856779,2+)

Title: Elution from: 29.877 to 29.877 scan no 2288 cid35.00 polarity:+:MA10

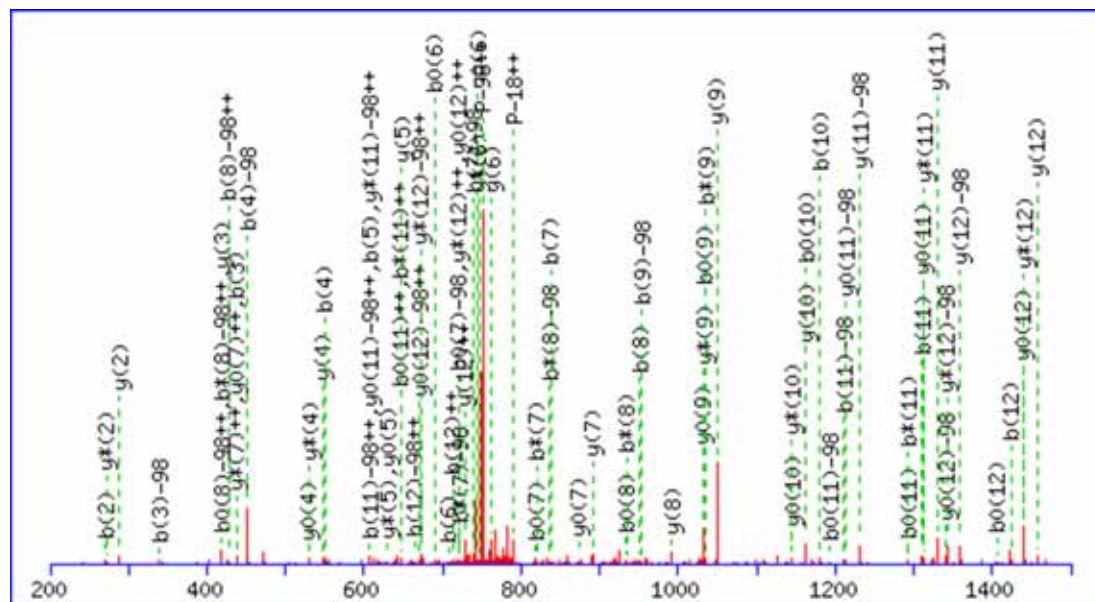

**Monoisotopic mass of neutral peptide Mr(calc):** 1597.6985

**Fixed modifications:** Carbamidomethyl (C) (apply to specified residues or termini only)

**Variable modifications:**

**N-term :** Dimethyl (N-term)

**S3 :** Phospho (ST), with neutral losses 97.9769(shown in table), 0.0000

**Ions Score:** 53 **Expect:** 0.00017

**Matched b ions:** b(2), b(3)-98, b(3), b(4)-98, b(4), b(5), b(6), b(7)-98, b(7), b(8)-98++, b(8), b(9)-98, b(10), b(11)-98++, b(11), b(11)-98, b(12), b(12)-98++, b(12)++

**Matched y ions:** y(2), y(3), y(4), y(5), y(6), y(7), y(8), y(9), y(10), y(11), y(11)-98, y(12), y(12)-98, y(12)++

**Precursor origin neutral loss:** +

## Peptide No.543

**LQVPGGDSDEETK**

**Confirmed sites:** @S:8

**Ambiguous sites:**

**MS/MS Fragmentation of** **LQVPGGDSDEETK**

Found in **OBSCN\_MOUSE**, Obscurin OS=Mus musculus GN=Obscn PE=2 SV=2

Match to Query 2540: 1509.661052 from(755.837802,2+)

Title: Elution from: 34.386 to 34.386 scan no 2904 cid35.00 polarity:+:MA10



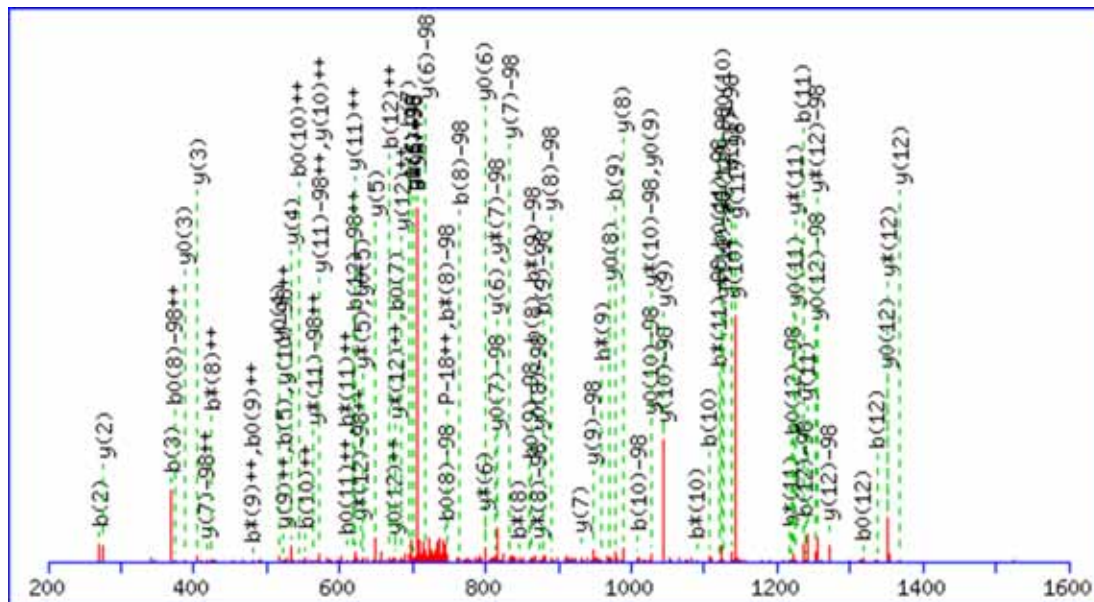

**Monoisotopic mass of neutral peptide Mr(calc):** 1509.6600

**Fixed modifications:** Carbamidomethyl (C) (apply to specified residues or termini only)

**Variable modifications:**

**N-term :** Dimethyl (N-term)

**S8 :** Phospho (ST), with neutral losses 0.0000(shown in table), 97.9769

**K13 :** Dimethyl (K)

**Ions Score:** 57 **Expect:** 5.9e-005

**Matched b ions:** b(2), b(3), b(5), b(7), b(8)-98, b(8), b(9)-98, b(9), b(10)++, b(10), b(10)-98, b(11), b(11)-98, b(12)++, b(12), b(12)-98+, b(12)-98

**Matched y ions:** y(2), y(3), y(4), y(5), y(6), y(6)-98, y(7)-98+, y(7), y(7)-98, y(8), y(8)-98, y(9)-98, y(9), y(9)++, y(10)-98, y(10), y(10)++, y(10)-98+, y(11), y(11)++, y(11)-98, y(11)-98+, y(12)-98, y(12), y(12)++

**Precursor origin neutral loss:** +

## Peptide No.544

**LQVPGGDSDEETK**

**Confirmed sites:** @S:8

**Ambiguous sites:**

**MS/MS Fragmentation of LQVPGGDSDEETK**

Found in **OBSCN\_MOUSE**, Obscurin OS=Mus musculus GN=Obscn PE=2 SV=2

Match to Query 2052: 1521.723996 from(761.869274,2+)

Title: Elution from: 33.875 to 33.875 scan no 2624 cid35.00 polarity:+:MA10

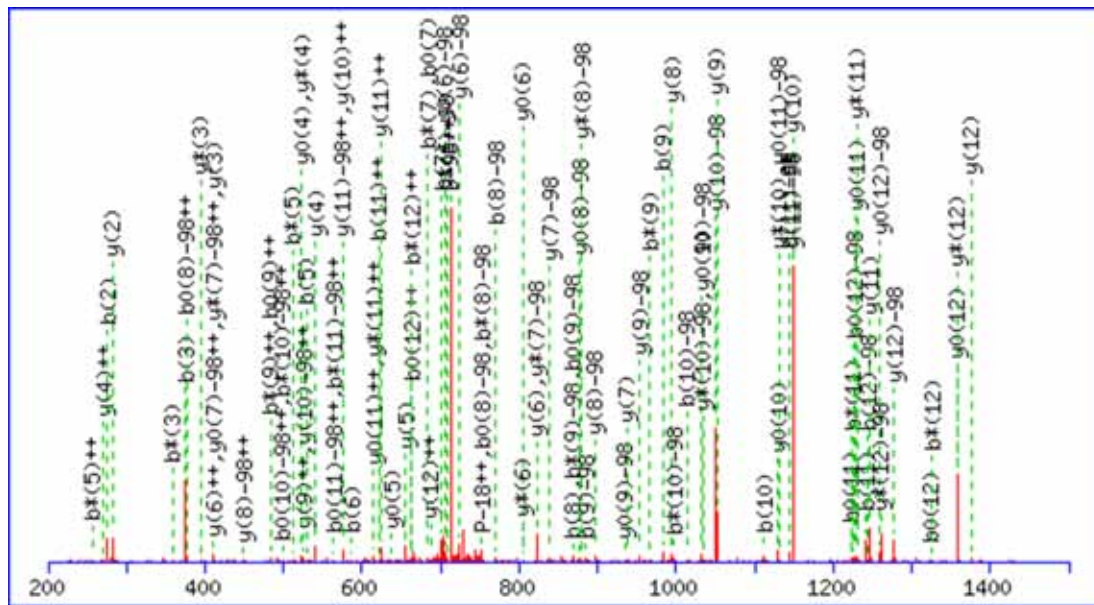

**Monoisotopic mass of neutral peptide Mr(calc): 1521.7236**

**Fixed modifications:** Carbamidomethyl (C) (apply to specified residues or termini only)

**Variable modifications:**

**N-term :** Dimethyl:2H(4)13C(2) (N-term)

**S8 :** Phospho (ST), with neutral losses 97.9769(shown in table), 0.0000

**K13 :** Dimethyl:2H(4)13C(2) (K)

**Ions Score:** 55 **Expect:** 0.00013

**Matched b ions:** b(2), b(3), b(5), b(6), b(7), b(8), b(8)-98, b(9), b(9)-98, b(10), b(10)-98, b(11), b(11)-98, b(11)++, b(12)-98

**Matched y ions:** y(2), y(3), y(4), y(4)++, y(5), y(6)++, y(6), y(6)-98, y(7)-98, y(7), y(8)-98, y(8), y(8)-98++, y(9)++, y(9), y(9)-98, y(10)-98, y(10), y(10)-98++, y(10)++, y(11), y(11)++, y(11)-98, y(11)-98++, y(12)-98, y(12), y(12)++

**Precursor origin neutral loss:** +

## Peptide No.545

**LQVPGGDSDEETKTPSASPR**

**Confirmed sites:** @S:8

**Ambiguous sites:**

MS/MS Fragmentation of **LQVPGGDSDEETKTPSASPR**

Found in **OBSCN\_MOUSE**, Obscurin OS=Mus musculus GN=Obscn PE=2 SV=2

Match to Query 5592: 2206.016547 from(736.346125,3+)

Title: Elution from: 34.518 to 34.518 scan no 2705 cid35.00 polarity:+:MA10:m1s

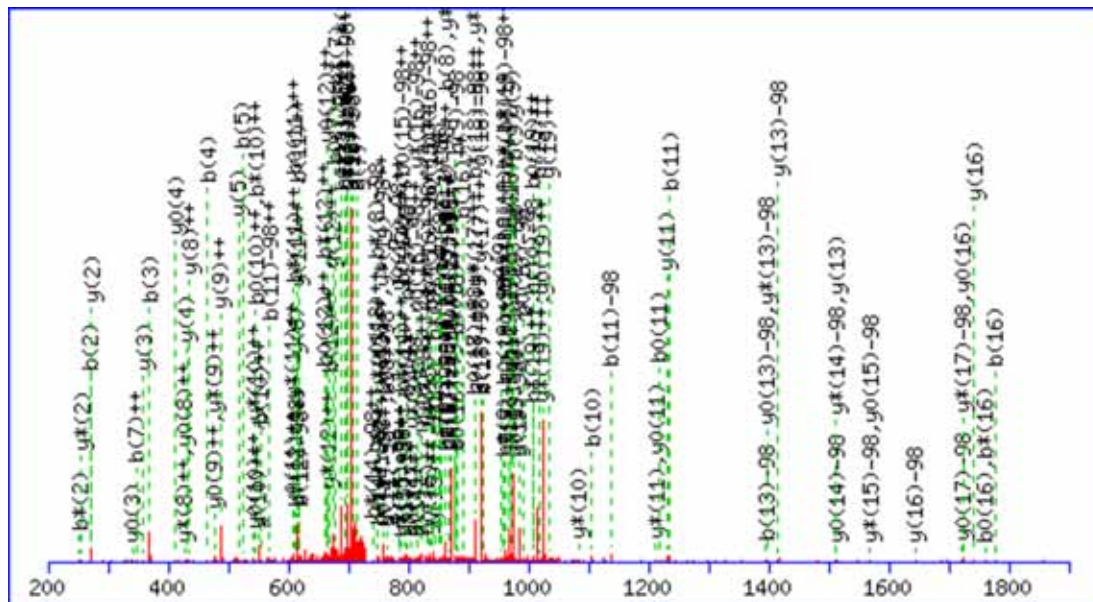

**Monoisotopic mass of neutral peptide Mr(calc):** 2206.0155

**Fixed modifications:** Carbamidomethyl (C) (apply to specified residues or termini only)

**Variable modifications:**

**N-term :** Dimethyl (N-term)

**S8 :** Phospho (ST), with neutral losses 97.9769(shown in table), 0.0000

**K13 :** Dimethyl (K)

**Ions Score:** 53 **Expect:** 0.00033

**Matched b ions:** b(2), b(3), b(4), b(5), b(7)++, b(7), b(8)-98, b(8), b(9), b(9)-98, b(10), b(10)++, b(10)-98, b(11)-98, b(11), b(11)-98++, b(11)++, b(12)-98++, b(12)++, b(13)-98++, b(13)-98, b(14)++, b(14)-98++, b(15)-98++, b(16), b(16)++, b(17)++, b(18)-98++, b(18)++, b(19)-98++, b(19)++

**Matched y ions:** y(2), y(3), y(4), y(5), y(6), y(7), y(8), y(8)++, y(9)++, y(9), y(10)++, y(11)++, y(11), y(12)++, y(13)++, y(13)-98, y(13), y(13)-98++, y(14)-98++, y(14)++, y(15)++, y(15)-98++, y(16)++, y(16)-98, y(16)-98++, y(16), y(17)++, y(17)-98++, y(18)-98++, y(18)++, y(19)-98++, y(19)++

**Precursor origin neutral loss:** +

## Peptide No.546

**LQVPGGDSDEETKTPSASPR**

**Confirmed sites:** @S:8,@S:18

**Ambiguous sites:**

MS/MS Fragmentation of **LQVPGGDSDEETKTPSASPR**

Found in **OBSCN\_MOUSE**, Obscurin OS=Mus musculus GN=Obscn PE=2 SV=2

Match to Query 5570: 2285.983779 from(763.001869,3+)

Title: Elution from: 36.685 to 36.685 scan no 2909 cid35.00 polarity:+:MA10:m1s

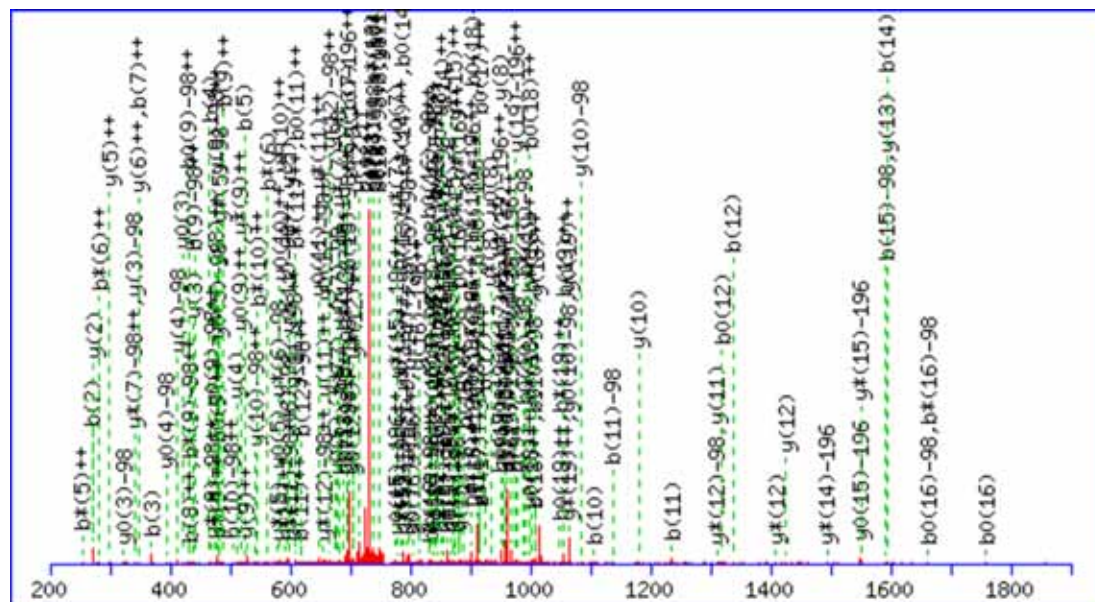

**Monoisotopic mass of neutral peptide Mr(calc):** 2285.9818

**Fixed modifications:** Carbamidomethyl (C) (apply to specified residues or termini only)

**Variable modifications:**

**N-term :** Dimethyl (N-term)

**S8 :** Phospho (ST), with neutral losses 0.0000(shown in table), 97.9769

**K13 :** Dimethyl (K)

**S18 :** Phospho (ST), with neutral losses 0.0000(shown in table), 97.9769

**Ions Score:** 33 **Expect:** 0.027

**Matched b ions:** b(2), b(3), b(4), b(5), b(7)++, b(7), b(8), b(8)++, b(9)++, b(9)-98++, b(9)-98, b(9), b(10), b(10)-98, b(10)-98++, b(11), b(11)++, b(11)-98, b(12), b(12)-98++, b(13)-98++, b(13)++, b(14), b(14)++, b(14)-98++, b(15)-98++, b(15)-98, b(15)++, b(16)-98++, b(16)++, b(17)++, b(17)-98++, b(18)-196++, b(18)-98++, b(18)++, b(19)-196++, b(19)++, b(19)-98++

**Matched y ions:** y(2), y(3), y(3)-98, y(4)-98, y(4), y(5), y(5)++, y(6)-98, y(6)++, y(6), y(7)-98, y(7), y(8), y(8)-98, y(8)++, y(9)-98++, y(9)++, y(9)-98, y(10)-98++, y(10)++, y(10)-98, y(10), y(11), y(11)-98++, y(11)++, y(12), y(12)++, y(12)-98++, y(13)-196++, y(13)++, y(13), y(13)-98, y(13)-98++, y(14)-98++, y(14)++, y(15)-196++, y(15)-98++, y(15)++, y(16)++, y(16)-98++, y(16)-196++, y(17)-98++, y(17)++, y(17)-196++, y(18)-196++, y(18)-98++, y(18)++, y(19)-196++, y(19)-98++

**Precursor origin neutral loss:** +

## Peptide No.547

**LQVPGGDSDEETKTPSASPR**

**Confirmed sites:** @S:8,@T:14

**Ambiguous sites:**

MS/MS Fragmentation of **LQVPGGDSDEETKTPSASPR**

Found in **OBSCN\_MOUSE**, Obscurin OS=Mus musculus GN=Obscn PE=2 SV=2

Match to Query 5568: 2285.984916 from(763.002248,3+)

Title: Elution from: 36.661 to 36.661 scan no 2991 cid35.00 polarity:+:MA10:m1s



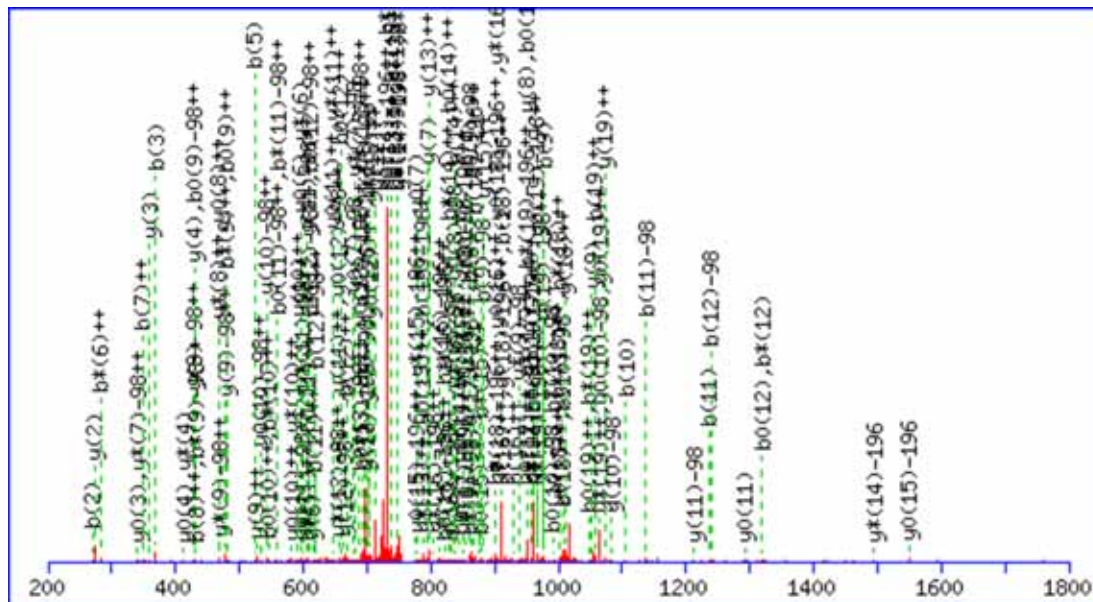

**Monoisotopic mass of neutral peptide Mr(calc):** 2285.9818

**Fixed modifications:** Carbamidomethyl (C) (apply to specified residues or termini only)

**Variable modifications:**

**N-term :** Dimethyl (N-term)

**S8 :** Phospho (ST), with neutral losses 97.9769(shown in table), 0.0000

**K13 :** Dimethyl (K)

**T14 :** Phospho (ST), with neutral losses 97.9769(shown in table), 0.0000

**Ions Score:** 39 **Expect:** 0.0058

**Matched b ions:** b(2), b(3), b(5), b(7)++, b(7), b(8), b(8)++, b(9)-98, b(9), b(10), b(10)-98, b(11), b(11)-98, b(11)++, b(12)-98, b(12)++, b(12)-98++, b(13)-98++, b(13)++, b(14)-98++, b(14)-196++, b(14)++, b(15)-196++, b(15)-98++, b(16)-98, b(16)-196++, b(16)-98++, b(16)++, b(17)-196++, b(17)-98++, b(18)-98++, b(18)-196++, b(18)++, b(19)-196++, b(19)++, b(19)-98++

**Matched y ions:** y(2), y(3), y(4), y(6), y(7)-98, y(7), y(8), y(8)-98++, y(8)-98, y(9)-98++, y(9)++, y(9), y(10)-98++, y(10)++, y(10)-98, y(11)-98++, y(11)++, y(11)-98, y(12)++, y(12)-98++, y(13)++, y(13)-98, y(13)-98++, y(13)-196++, y(14)-98++, y(14)++, y(15)-98++, y(15)++, y(16)-98++, y(16)++, y(16)-196++, y(17)++, y(17)-196++, y(17)-98++, y(18)-98++, y(18)-196++, y(18)++, y(19)++, y(19)-196++, y(19)-98++

**Precursor origin neutral loss:** +

## Peptide No.548

**LQVPGGDSDEETKTPSASPR**

**Confirmed sites:** @S:8,@T:14,@S:18

**Ambiguous sites:**

MS/MS Fragmentation of **LQVPGGDSDEETKTPSASPR**

Found in **OBSCN\_MOUSE**, Obscurin OS=Mus musculus GN=Obscn PE=2 SV=2

Match to Query 5738: 2365.950210 from(789.657346,3+)

Title: Elution from: 38.788 to 38.788 scan no 3261 cid35.00 polarity:+:MA10:m1s













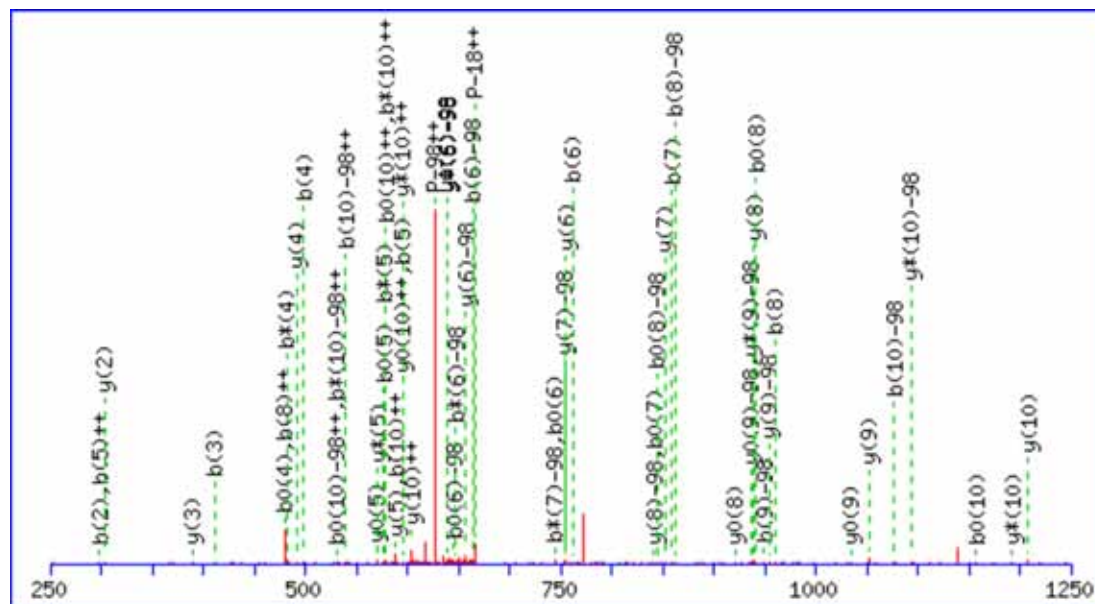

**Monoisotopic mass of neutral peptide Mr(calc):** 1348.6864

**Fixed modifications:** Carbamidomethyl (C) (apply to specified residues or termini only)

**Variable modifications:**

**N-term :** Dimethyl (N-term)

**S6 :** Phospho (ST), with neutral losses 97.9769(shown in table), 0.0000

**Ions Score:** 33 **Expect:** 0.022

**Matched b ions:** b(2), b(3), b(4), b(5)++, b(5), b(6)-98, b(6), b(7), b(8)++, b(8)-98, b(8), b(9)-98, b(10)++, b(10)-98++, b(10)-98

**Matched y ions:** y(2), y(3), y(4), y(5), y(6)-98, y(6), y(7)-98, y(7), y(8), y(8)-98, y(9), y(9)-98, y(10), y(10)++

**Precursor origin neutral loss:** +

## Peptide No.553

**LRLSPSPTSQR**

**Confirmed sites:** @S:4

**Ambiguous sites:**

**MS/MS Fragmentation of LRLSPSPTSQR**

Found in **LMNA\_MOUSE**, Prelamin-A/C OS=Mus musculus GN=Lmna PE=1 SV=2

Match to Query 1405: 1354.718016 from(452.579948,3+)

Title: Elution from: 30.626 to 30.626 scan no 2190 cid35.00 polarity:+:MA10

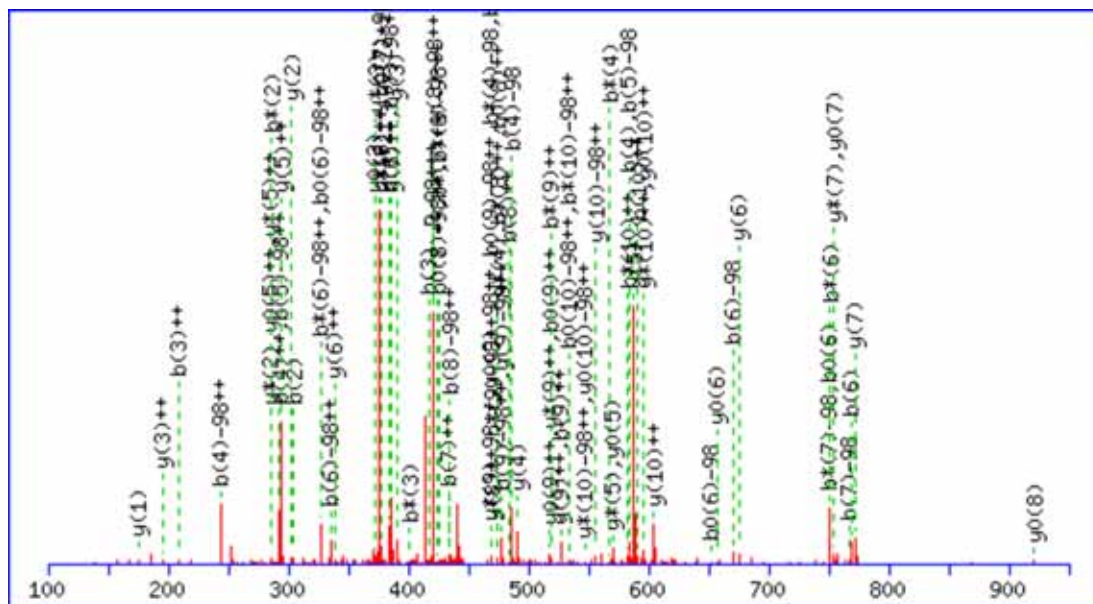

**Monoisotopic mass of neutral peptide Mr(calc):** 1354.7182

**Fixed modifications:** Carbamidomethyl (C) (apply to specified residues or termini only)

**Variable modifications:**

**N-term :** Dimethyl:2H(4)13C(2) (N-term)

**S4 :** Phospho (ST), with neutral losses 97.9769(shown in table), 0.0000

**Ions Score:** 32 **Expect:** 0.018

**Matched b ions:** b(2), b(3)++, b(3), b(4)-98++, b(4)-98, b(4)++, b(4), b(5)-98++, b(5)-98, b(6)-98, b(6), b(6)-98++, b(6)++, b(7)-98++, b(7)-98, b(7)++, b(8)-98++, b(8)++, b(9)-98++, b(9)++, b(10)++

**Matched y ions:** y(1), y(2), y(3)++, y(3), y(4), y(5)++, y(5), y(6), y(6)++, y(7), y(7)++, y(8)-98++, y(8)++, y(9)-98++, y(9)++, y(10)++, y(10)-98++

**Precursor origin neutral loss:** +

## Peptide No.554

**LRLSPSPTSQR**

**Confirmed sites:** @S:4,@S:6

**Ambiguous sites:**

**MS/MS Fragmentation of LRLSPSPTSQR**

Found in **LMNA\_MOUSE**, Prelamin-A/C OS=Mus musculus GN=Lmna PE=1 SV=2

Match to Query 2937: 1434.685652 from(718.350102,2+)

Title: Elution from: 33.044 to 33.044 scan no 2645 cid35.00 polarity:+:MA10

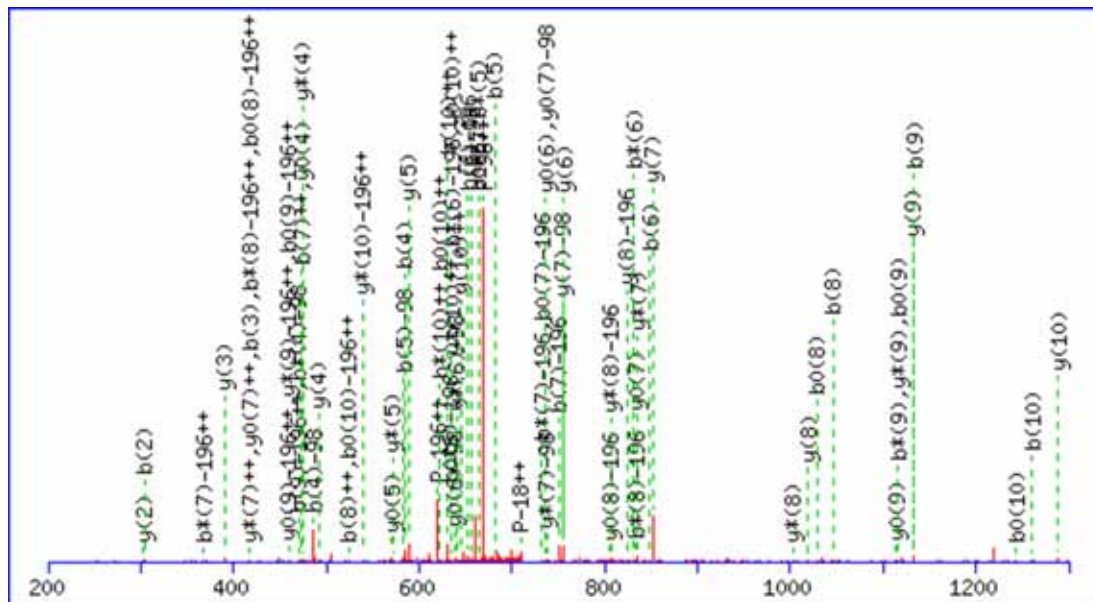

**Monoisotopic mass of neutral peptide Mr(calc):** 1434.6845

**Fixed modifications:** Carbamidomethyl (C) (apply to specified residues or termini only)

**Variable modifications:**

**N-term :** Dimethyl:2H(4)13C(2) (N-term)

**S4 :** Phospho (ST), with neutral losses 0.0000(shown in table), 97.9769

**S6 :** Phospho (ST), with neutral losses 0.0000(shown in table), 97.9769

**Ions Score:** 33 **Expect:** 0.019

**Matched b ions:** b(2), b(3), b(4)-98, b(4), b(5)-98, b(5), b(6)-98, b(6)-196, b(6), b(7)-196, b(7)++, b(7)-98, b(8)-98++, b(8)++, b(8)-98, b(8), b(9), b(9)-98, b(9)-196++, b(10), b(10)-98, b(10)++

**Matched y ions:** y(2), y(3), y(4), y(5), y(6), y(6)-98, y(7), y(7)-98, y(8), y(8)-98, y(8)-196, y(9)-98, y(9), y(10), y(10)-98, y(10)++

**Precursor origin neutral loss:** +

## Peptide No.555

**LRLSPSPTSQR**

**Confirmed sites:** @S:6,@T:8

**Ambiguous sites:**

MS/MS Fragmentation of **LRLSPSPTSQR**

Found in **LMNA\_MOUSE**, Prelamin-A/C OS=Mus musculus GN=Lmna PE=1 SV=2

Match to Query 1703: 1434.685198 from(718.349875,2+)

Title: Elution from: 33.480 to 33.480 scan no 2574 cid35.00 polarity:+MA10







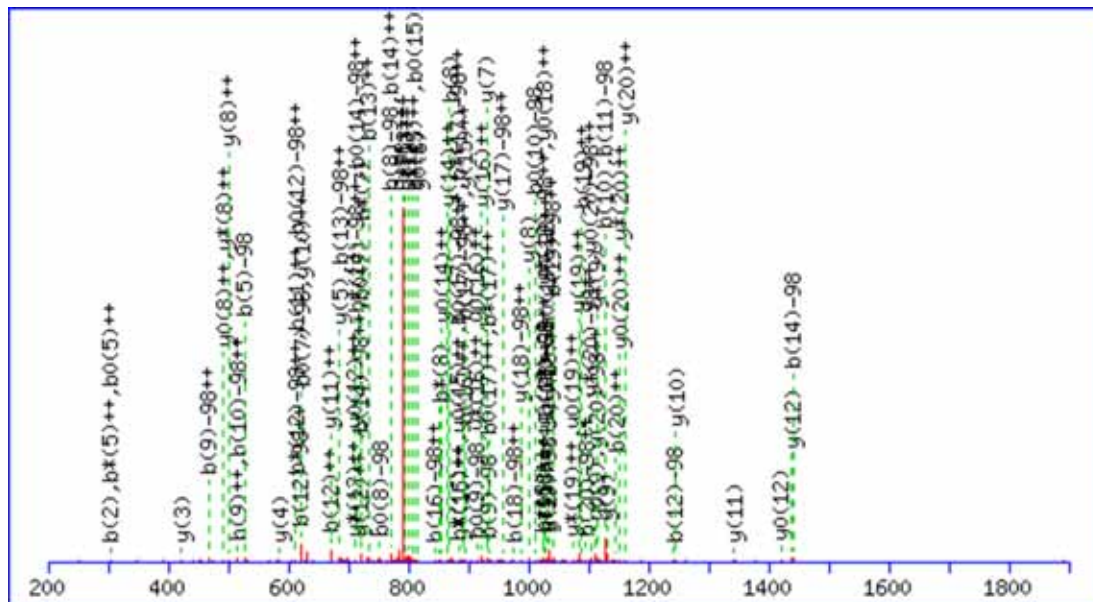

**Monoisotopic mass of neutral peptide Mr(calc):** 2468.3201

**Fixed modifications:** Carbamidomethyl (C) (apply to specified residues or termini only)

**Variable modifications:**

**N-term :** Dimethyl:2H(4)13C(2) (N-term)

**S5 :** Phospho (ST), with neutral losses 97.9769(shown in table), 0.0000

**K9 :** Dimethyl:2H(4)13C(2) (K)

**K21 :** Dimethyl:2H(4)13C(2) (K)

**Ions Score:** 48 **Expect:** 0.00084

**Matched b ions:** b(2), b(5)-98, b(8)-98, b(8), b(9)++, b(9)-98, b(9)-98, b(9), b(10)-98, b(10), b(10)-98, b(11)-98, b(11)++, b(12)-98, b(12)++, b(12)-98, b(13)-98, b(13)++, b(14)-98, b(14)-98, b(14)++, b(15)-98, b(16)-98, b(16)++, b(17)-98, b(18)-98, b(18)++, b(19)-98, b(19)++, b(20)-98, b(20)++

**Matched y ions:** y(3), y(4), y(5), y(7), y(8), y(8)++, y(9), y(10), y(10)++, y(11), y(11)++, y(12), y(12)++, y(13)++, y(14)++, y(15)++, y(16)++, y(17)-98, y(18)++, y(18)-98, y(19)-98, y(19)++, y(20)++, y(20)-98

**Precursor origin neutral loss:** +

## Peptide No.558

**LSFADR**

**Confirmed sites:** @S:2

**Ambiguous sites:**

**MS/MS Fragmentation of LSFADR**

Found in **KPCT\_MOUSE**, Protein kinase C theta type OS=Mus musculus GN=Prkcq PE=1 SV=1

Match to Query 178: 815.357910 from(408.686231,2+)

Title: Elution from: 37.609 to 37.609 scan no 3346 cid35.00 polarity:+:MA10

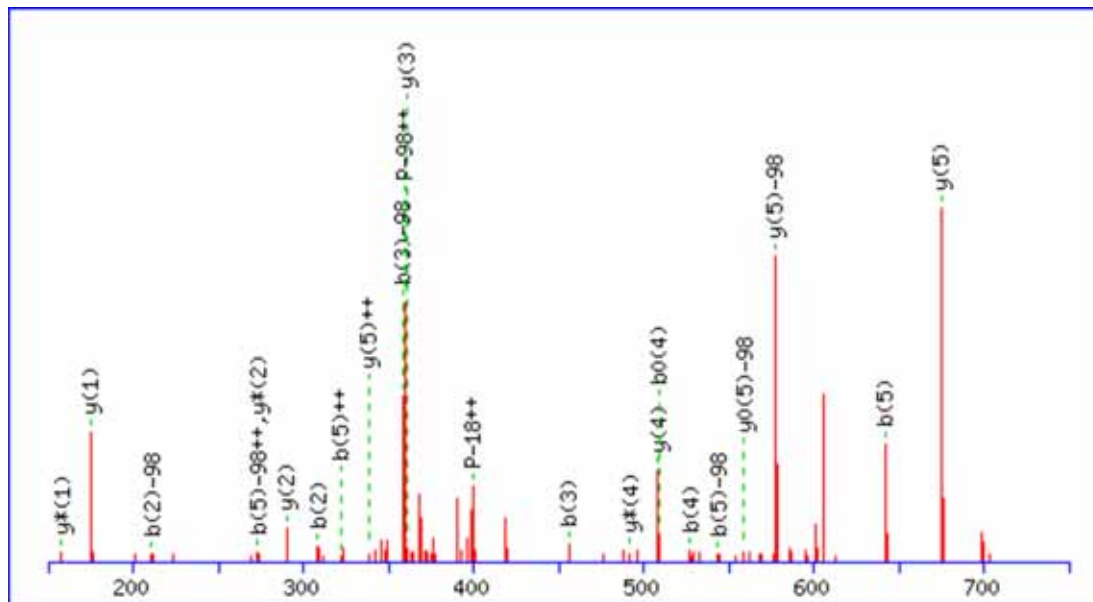

**Monoisotopic mass of neutral peptide Mr(calc):** 815.3578

**Fixed modifications:** Carbamidomethyl (C) (apply to specified residues or termini only)

**Variable modifications:**

**N-term :** Dimethyl (N-term)

**S2 :** Phospho (ST), with neutral losses 97.9769(shown in table), 0.0000

**Ions Score:** 33 **Expect:** 0.0051

**Matched b ions:** b(2)-98, b(2), b(3)-98, b(3), b(4), b(5), b(5)-98++, b(5)-98, b(5)++

**Matched y ions:** y(1), y(2), y(3), y(4), y(5)-98, y(5), y(5)++

**Precursor origin neutral loss:** +

## Peptide No.559

**LSLDEGGSDTESLYEIEGLNK**

**Confirmed sites:** @S:2,@T:10

**Ambiguous sites:**

MS/MS Fragmentation of **LSLDEGGSDTESLYEIEGLNK**

Found in **CAC1S\_MOUSE**, Voltage-dependent L-type calcium channel subunit alpha-1S OS=Musculus GN=Cacna1s PE=1 SV=2

Match to Query 6691: 2484.063194 from(1243.038873,2+)

Title: Elution from: 66.247 to 66.247 scan no 6222 cid35.00 polarity:+:MA10:m1s



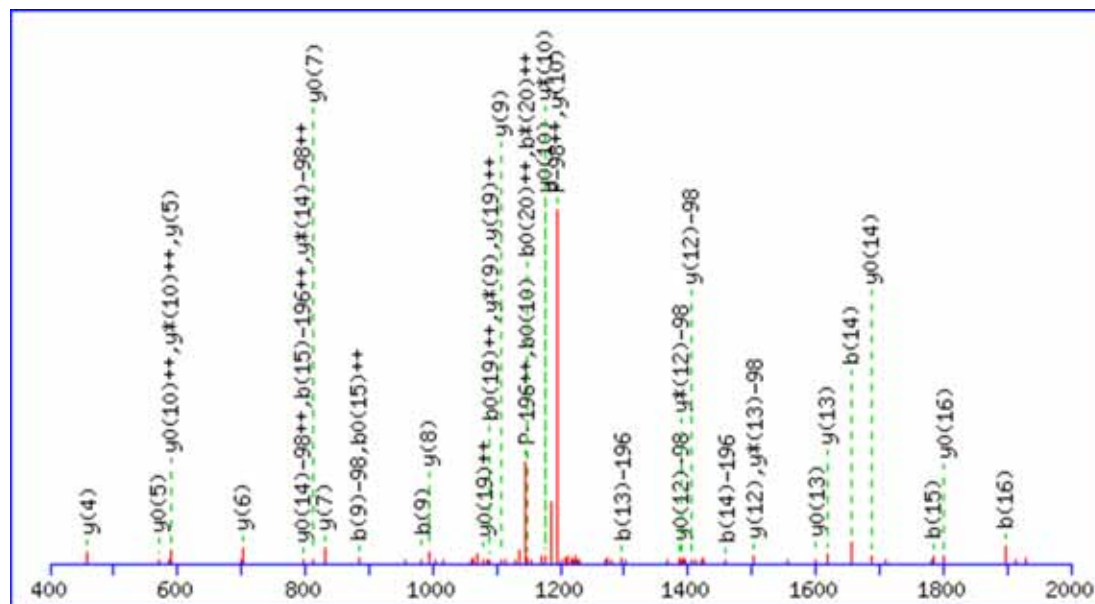

**Monoisotopic mass of neutral peptide Mr(calc):** 2484.0597

**Fixed modifications:** Carbamidomethyl (C) (apply to specified residues or termini only)

**Variable modifications:**

**N-term :** Dimethyl (N-term)

**S2 :** Phospho (ST), with neutral losses 0.0000(shown in table), 97.9769

**T10 :** Phospho (ST), with neutral losses 0.0000(shown in table), 97.9769

**K21 :** Dimethyl (K)

**Ions Score:** 53 **Expect:** 0.00028

**Matched b ions:** b(9)-98, b(9), b(11)-98, b(12)-98, b(13)-98, b(13)-196, b(14), b(14)-196, b(14)-98, b(15), b(15)-98, b(15)-196++, b(16), b(16)-98, b(17)-98, b(18)-98++, b(20)-98++

**Matched y ions:** y(4), y(5), y(6), y(7), y(8), y(9), y(10), y(12), y(12)-98, y(13), y(19)++

**Precursor origin neutral loss:** +

## Peptide No.560

**LSLDEGGSDTESLYEIEGLNK**

**Confirmed sites:** @S:8,@S:12

**Ambiguous sites:**

MS/MS Fragmentation of **LSLDEGGSDTESLYEIEGLNK**

Found in **CAC1S\_MOUSE**, Voltage-dependent L-type calcium channel subunit alpha-1S OS=Musculus musculus GN=Cacna1s PE=1 SV=2

Match to Query 6309: 2484.061959 from(829.027929,3+)

Title: Elution from: 66.062 to 66.062 scan no 6151 cid35.00 polarity:+:MA10:m1s

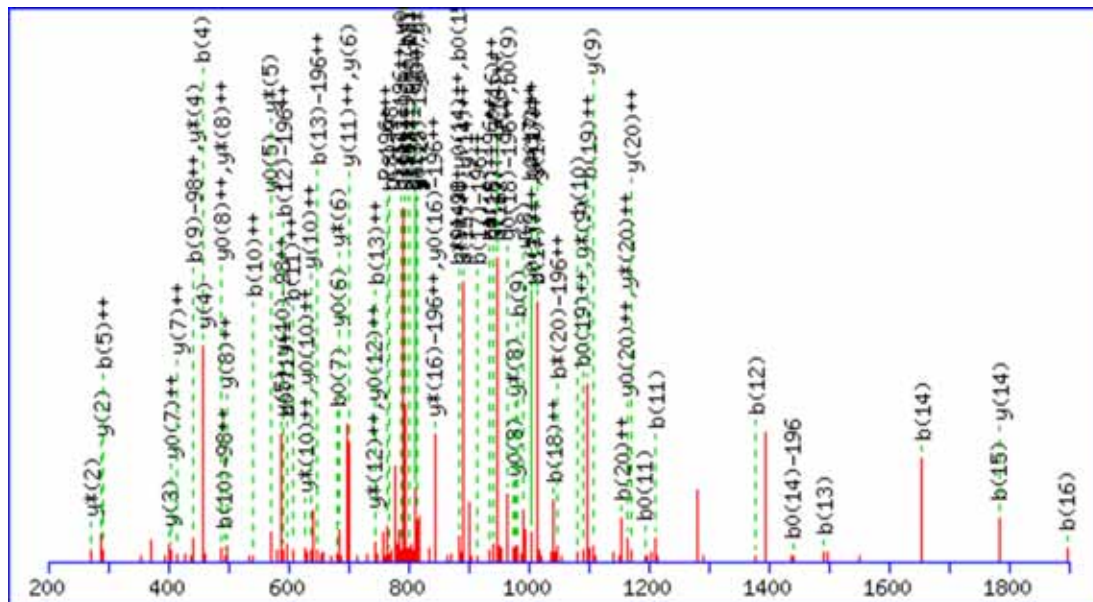

**Monoisotopic mass of neutral peptide Mr(calc):** 2484.0597

**Fixed modifications:** Carbamidomethyl (C) (apply to specified residues or termini only)

**Variable modifications:**

**N-term :** Dimethyl (N-term)

**S8 :** Phospho (ST), with neutral losses 0.0000(shown in table), 97.9769

**S12 :** Phospho (ST), with neutral losses 0.0000(shown in table), 97.9769

**K21 :** Dimethyl (K)

**Ions Score:** 50 **Expect:** 0.00061

**Matched b ions:** b(4), b(5)++, b(8)-98, b(9)-98, b(9)-98++, b(9), b(10)-98++, b(10)++, b(10), b(11), b(11)++, b(12)-98, b(12)-98++, b(12), b(12)-196++, b(13)-98++, b(13)-98, b(13), b(13)-196++, b(13)++, b(14), b(14)-98++, b(15), b(15)++, b(15)-98++, b(15)-196++, b(16)++, b(16), b(16)-98++, b(17)++, b(17)-98++, b(17)-196++, b(18)++, b(18)-98++, b(19)++, b(19)-98++, b(20)++, b(20)-98++

**Matched y ions:** y(2), y(3), y(4), y(5), y(6), y(7)++, y(8)++, y(8), y(9), y(10)-98++, y(10)++, y(11)++, y(13)++, y(14)++, y(14), y(14)-98++, y(14)-196++, y(16)++, y(17)++, y(20)++

**Precursor origin neutral loss:** +

## Peptide No.561

**LSLDEGGSDTESLYEIEGLNK**

**Confirmed sites:** @S:8,@Y:14

**Ambiguous sites:**

MS/MS Fragmentation of **LSLDEGGSDTESLYEIEGLNK**

Found in **CAC1S\_MOUSE**, Voltage-dependent L-type calcium channel subunit alpha-1S OS=Mus musculus GN=Cacna1s PE=1 SV=2

Match to Query 5968: 2484.061820 from(1243.038186,2+)

Title: Elution from: 65.942 to 65.942 scan no 6074 cid35.00 polarity:+:MA10:m1s

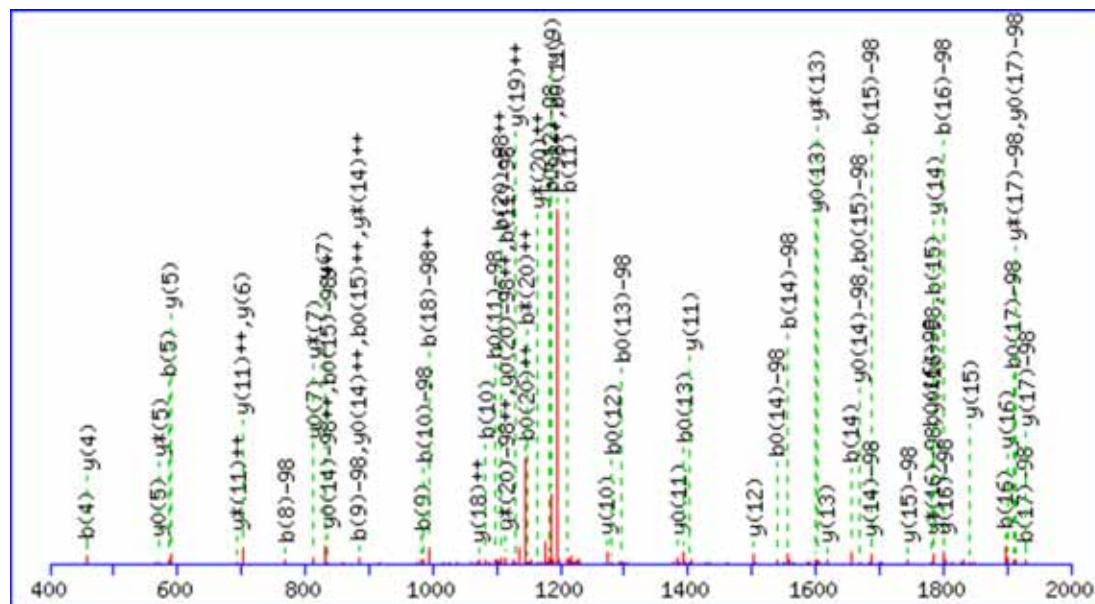

**Monoisotopic mass of neutral peptide Mr(calc):** 2484.0597

**Fixed modifications:** Carbamidomethyl (C) (apply to specified residues or termini only)

**Variable modifications:**

**N-term :** Dimethyl (N-term)

**S8 :** Phospho (ST), with neutral losses 97.9769(shown in table), 0.0000

**Y14 :** Phospho (Y)

**K21 :** Dimethyl (K)

**Ions Score:** 57 **Expect:** 0.00014

**Matched b ions:** b(4), b(5), b(8)-98, b(9)-98, b(9), b(10)-98, b(10), b(11)-98, b(11), b(14), b(14)-98, b(15)-98, b(15), b(16)-98, b(16), b(17)-98, b(18)-98++, b(20)-98++

**Matched y ions:** y(4), y(5), y(6), y(7), y(9), y(10), y(11)++, y(11), y(12), y(13), y(14)-98, y(14), y(15)-98, y(15), y(16)-98, y(16), y(17)-98, y(18)++, y(19)++

**Precursor origin neutral loss:** +

## Peptide No.562

**LSLDEGGSDTESLYEIEGLNK**

**Confirmed sites:** @S:8,@T:10

**Ambiguous sites:**

**MS/MS Fragmentation of LSLDEGGSDTESLYEIEGLNK**

Found in **CAC1S\_MOUSE**, Voltage-dependent L-type calcium channel subunit alpha-1S OS=Mus musculus GN=Cacna1s PE=1 SV=2

Match to Query 7994: 2484.061490 from(1243.038021,2+)

Title: Elution from: 65.977 to 65.977 scan no 6543 cid35.00 polarity:+:MA10:m1s

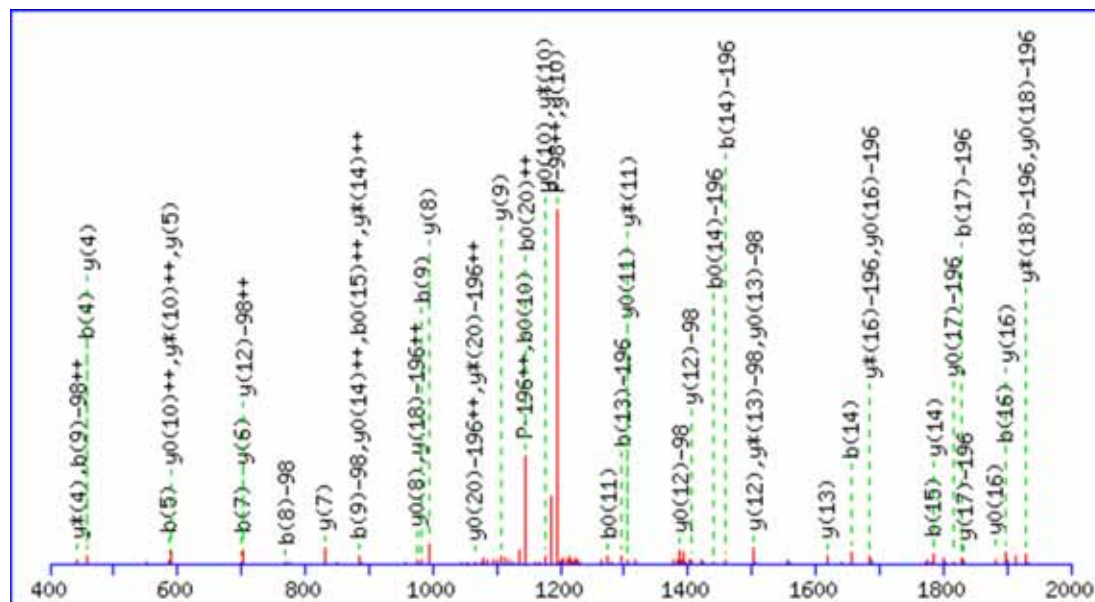

**Monoisotopic mass of neutral peptide Mr(calc):** 2484.0597

**Fixed modifications:** Carbamidomethyl (C) (apply to specified residues or termini only)

**Variable modifications:**

**N-term :** Dimethyl (N-term)

**S8 :** Phospho (ST), with neutral losses 0.0000(shown in table), 97.9769

**T10 :** Phospho (ST), with neutral losses 0.0000(shown in table), 97.9769

**K21 :** Dimethyl (K)

**Ions Score:** 68 **Expect:** 9.5e-006

**Matched b ions:** b(4), b(5), b(7), b(8)-98, b(9)-98, b(9), b(9)-98++, b(10)-98, b(11)-98, b(12)-98, b(13)-196, b(13)-98, b(14), b(14)-98, b(14)-196, b(15), b(15)-98, b(16), b(16)-98, b(17)-98, b(17)-196, b(18)-98++, b(20)-98++

**Matched y ions:** y(4), y(5), y(6), y(7), y(8), y(9), y(10), y(12), y(12)-98++, y(12)-98, y(13), y(14)-98, y(14), y(16), y(16)-98, y(17)-196, y(17)-98, y(18)-196++, y(19)-98++

**Precursor origin neutral loss:** +

## Peptide No.563

**LSLDEGGSDTESLYEIEGLNK**

**Confirmed sites:** @T:10,@S:12

**Ambiguous sites:**

MS/MS Fragmentation of **LSLDEGGSDTESLYEIEGLNK**

Found in **CAC1S\_MOUSE**, Voltage-dependent L-type calcium channel subunit alpha-1S OS=Mus musculus GN=Cacna1s PE=1 SV=2

Match to Query 6480: 2484.061005 from(829.027611,3+)

Title: Elution from: 65.950 to 65.950 scan no 6209 cid35.00 polarity:+:MA10:m1s



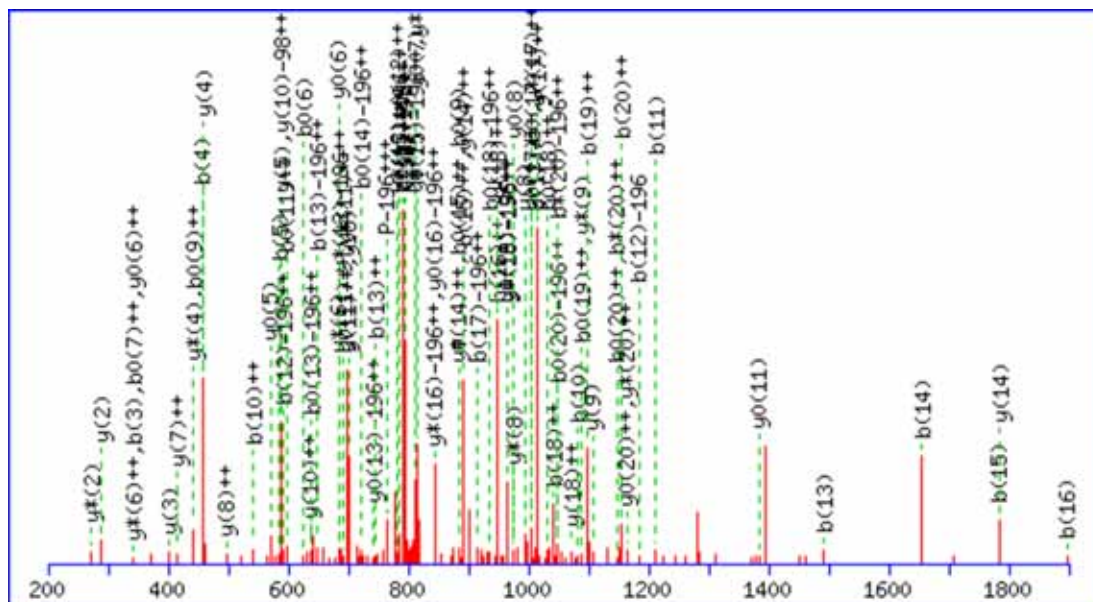

**Monoisotopic mass of neutral peptide Mr(calc):** 2484.0597

**Fixed modifications:** Carbamidomethyl (C) (apply to specified residues or termini only)

**Variable modifications:**

**N-term :** Dimethyl (N-term)

**T10 :** Phospho (ST), with neutral losses 0.0000(shown in table), 97.9769

**S12 :** Phospho (ST), with neutral losses 0.0000(shown in table), 97.9769

**K21 :** Dimethyl (K)

**Ions Score:** 40 **Expect:** 0.0057

**Matched b ions:** b(3), b(4), b(5), b(10)++, b(10), b(11), b(12)-98, b(12)-98++, b(12)-196++, b(12)-196, b(13)-98++, b(13)-98, b(13), b(13)-196++, b(13)++, b(14), b(14)-98++, b(15), b(15)++, b(15)-98++, b(15)-196++, b(16)++, b(16), b(16)-98++, b(17)++, b(17)-98++, b(17)-196++, b(18)++, b(18)-98++, b(19)++, b(19)-98++, b(20)++, b(20)-98++

**Matched y ions:** y(2), y(3), y(4), y(5), y(6), y(7)++, y(8)++, y(8), y(9), y(10)-98++, y(10)++, y(11)++, y(12)++, y(13)-98++, y(14)++, y(14), y(14)-98++, y(15)-98++, y(16)++, y(17)++, y(17)-98++, y(18)++, y(19)-98++

**Precursor origin neutral loss:** +

## Peptide No.564

**LSLDEGGSDTESLYEIEGLNK**

**Confirmed sites:** @T:10

**Ambiguous sites:** @S:12orY:14

MS/MS Fragmentation of **LSLDEGGSDTESLYEIEGLNK**

Found in **CAC1S\_MOUSE**, Voltage-dependent L-type calcium channel subunit alpha-1S OS=Mus musculus GN=Cacna1s PE=1 SV=2

Match to Query 7495: 2484.063363 from(829.028397,3+)

Title: Elution from: 66.036 to 66.036 scan no 6430 cid35.00 polarity:+:MA10:m1s

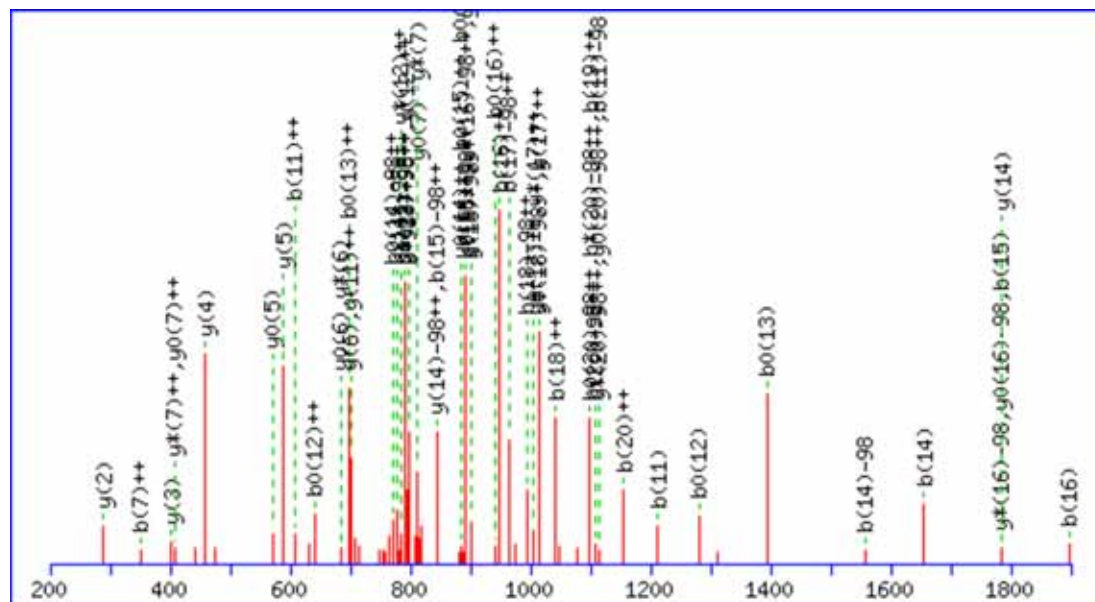

**Monoisotopic mass of neutral peptide Mr(calc):** 2484.0597

**Fixed modifications:** Carbamidomethyl (C) (apply to specified residues or termini only)

**Variable modifications:**

**N-term :** Dimethyl (N-term)

**T10 :** Phospho (ST), with neutral losses 0.0000(shown in table), 97.9769

**Y14 :** Phospho (Y)

**K21 :** Dimethyl (K)

**Ions Score:** 58 **Expect:** 8.9e-005

**Matched b ions:** b(7)++, b(11)++, b(11), b(11)-98, b(14)-98, b(14), b(14)-98++, b(15), b(15)++, b(15)-98++, b(16)++, b(16), b(16)-98++, b(17)++, b(17)-98++, b(18)++, b(18)-98++, b(19)++, b(20)++, b(20)-98++

**Matched y ions:** y(2), y(3), y(4), y(5), y(6), y(11)++, y(12)++, y(14)++, y(14), y(14)-98++, y(16)-98++, y(17)++

**Precursor origin neutral loss:**

## Peptide No.565

**LSLDEGGSDTESLYEIEGLNK**

**Confirmed sites:** @S:8,@S:12

**Ambiguous sites:**

MS/MS Fragmentation of **LSLDEGGSDTESLYEIEGLNK**

Found in **CAC1S\_MOUSE**, Voltage-dependent L-type calcium channel subunit alpha-1S OS=Mus musculus GN=Cacna1s PE=1 SV=2

Match to Query 6515: 2496.125715 from(833.049181,3+)

Title: Elution from: 65.974 to 65.974 scan no 6212 cid35.00 polarity:+:MA10:m1s



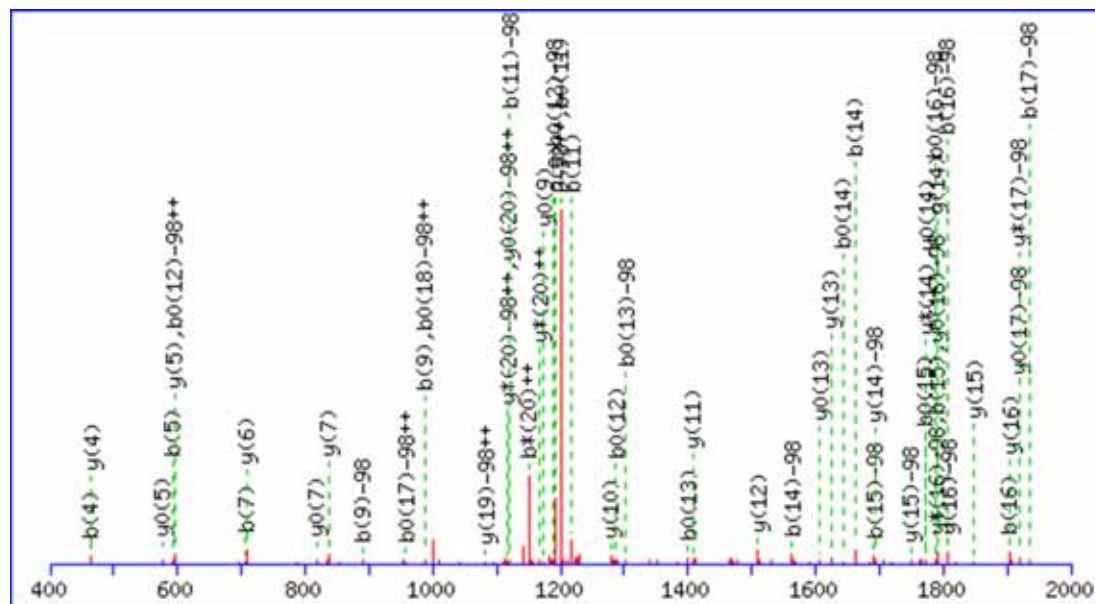

**Monoisotopic mass of neutral peptide Mr(calc):** 2496.1234

**Fixed modifications:** Carbamidomethyl (C) (apply to specified residues or termini only)

**Variable modifications:**

**N-term :** Dimethyl:2H(4)13C(2) (N-term)

**S8 :** Phospho (ST), with neutral losses 97.9769(shown in table), 0.0000

**Y14 :** Phospho (Y)

**K21 :** Dimethyl:2H(4)13C(2) (K)

**Ions Score:** 62 **Expect:** 4.6e-005

**Matched b ions:** b(4), b(5), b(7), b(9)-98, b(9), b(11), b(11)-98, b(14), b(14)-98, b(15)-98, b(15), b(16), b(16)-98, b(17)-98

**Matched y ions:** y(4), y(5), y(6), y(7), y(9), y(10), y(11), y(12), y(13), y(14)-98, y(14), y(15)-98, y(15), y(16), y(16)-98, y(19)-98++

**Precursor origin neutral loss:** +

## Peptide No.567

**LSLDEGGSDTESLYEIEGLNK**

**Confirmed sites:** @T:10,@S:12

**Ambiguous sites:**

MS/MS Fragmentation of **LSLDEGGSDTESLYEIEGLNK**

Found in **CAC1S\_MOUSE**, Voltage-dependent L-type calcium channel subunit alpha-1S OS=Mus musculus GN=Cacna1s PE=1 SV=2

Match to Query 8039: 2496.124350 from(833.048726,3+)

Title: Elution from: 66.062 to 66.062 scan no 6552 cid35.00 polarity:+:MA10:m1s



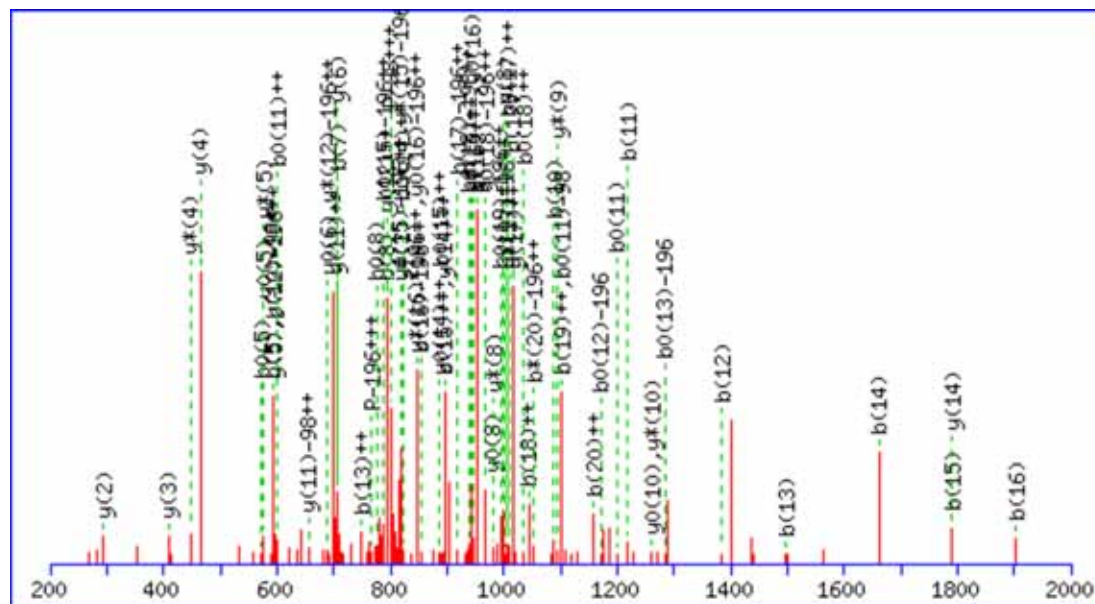

**Monoisotopic mass of neutral peptide Mr(calc):** 2496.1234

**Fixed modifications:** Carbamidomethyl (C) (apply to specified residues or termini only)

**Variable modifications:**

**N-term :** Dimethyl:2H(4)13C(2) (N-term)

**T10 :** Phospho (ST), with neutral losses 0.0000(shown in table), 97.9769

**S12 :** Phospho (ST), with neutral losses 0.0000(shown in table), 97.9769

**K21 :** Dimethyl:2H(4)13C(2) (K)

**Ions Score:** 40 **Expect:** 0.0074

**Matched b ions:** b(5), b(7), b(8), b(10), b(11), b(12)-196++, b(12)-98, b(12)-98++, b(12), b(13)-98++, b(13)-98, b(13), b(13)++, b(14)-98, b(14), b(14)-98++, b(15), b(15)-98++, b(15)++, b(16)++, b(16), b(16)-98++, b(16)-196++, b(17)++, b(17)-98++, b(17)-196++, b(18)++, b(18)-98++, b(19)++, b(19)-196++, b(19)-98++, b(20)++, b(20)-98++

**Matched y ions:** y(2), y(3), y(4), y(5), y(6), y(8), y(10)-98++, y(11)++, y(11)-98++, y(12)++, y(13)-98++, y(14)-98++, y(14)++, y(14), y(15)-98++, y(16)++, y(17)++, y(19)-98++

**Precursor origin neutral loss:** +

## Peptide No.568

**LSRSRTASLTSAASIDGSR**

**Confirmed sites:** @S:2,@S:4,@T:6,@S:8

**Ambiguous sites:**

MS/MS Fragmentation of **LSRSRTASLTSAASIDGSR**

Found in **NDRG2\_MOUSE**, Protein NDRG2 OS=Mus musculus GN=NdrG2 PE=1 SV=1

Match to Query 6339: 2288.943735 from(763.988521,3+)

Title: Elution from: 41.262 to 41.262 scan no 3674 cid35.00 polarity:+:MA10



Match to Query 5774: 2208.976476 from(737.332768,3+)

Title: Elution from: 37.281 to 37.281 scan no 3106 cid35.00 polarity:+:MA10:m1s

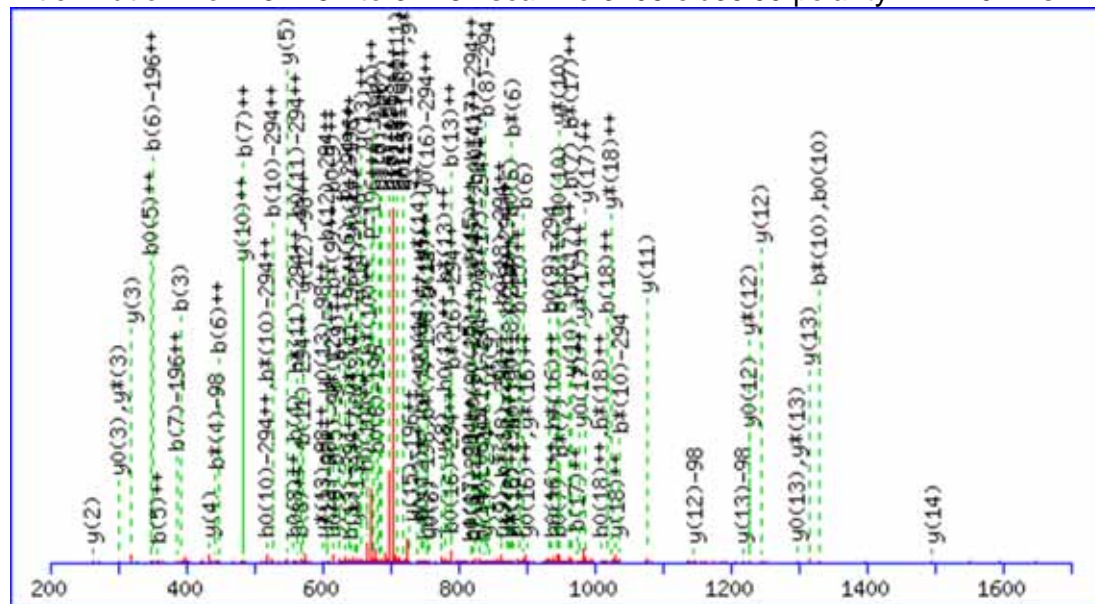

**Monoisotopic mass of neutral peptide Mr(calc): 2208.9754**

**Fixed modifications:** Carbamidomethyl (C) (apply to specified residues or termini only)

**Variable modifications:**

**N-term :** Dimethyl:2H(4)13C(2) (N-term)

**S4 :** Phospho (ST), with neutral losses 0.0000(shown in table), 97.9769

**T6 :** Phospho (ST), with neutral losses 0.0000(shown in table), 97.9769

**S8 :** Phospho (ST), with neutral losses 0.0000(shown in table), 97.9769

**Ions Score: 57 Expect: 0.00013**

**Matched b ions:** b(3), b(4), b(5)-98, b(5)++, b(6)-196++, b(6)-196, b(6)-98++, b(6)++, b(6), b(6)-98, b(7)-98++, b(7)++, b(7), b(7)-196++, b(7)-98, b(8)-98++, b(8)-196++, b(8)++, b(8)-294, b(8)-196, b(9)-98++, b(9)-196++, b(9)++, b(10)-98, b(10)-98++, b(10)-294++, b(10)-196++, b(10)++, b(11)-294++, b(11)-98++, b(11)++, b(12)-98++, b(12)-294++, b(12)-196++, b(12)++, b(13)++, b(13)-294++, b(13)-196++, b(13)-98++, b(14)-98++, b(14)++, b(15)-98++, b(15)-196++, b(15)++, b(16)-98++, b(16)++, b(16)-196++, b(17)-196++, b(17)-98++, b(17)++, b(18)-294++, b(18)-98++, b(18)++

**Matched y ions:** y(2), y(3), y(4), y(5), y(6), y(7), y(8), y(9), y(10), y(10)++, y(11), y(12), y(12)-98, y(12)-98++, y(13), y(13)-98, y(13)++, y(13)-98++, y(14)-98, y(14), y(14)-98, y(14)-196, y(14)++, y(15)-196, y(15)-98, y(16)-196, y(16)-98, y(17)++, y(17)-98, y(17)-294, y(17)-196, y(18)-98, y(18)++, y(18)-196

**Precursor origin neutral loss: +**

## Peptide No.570

**LSSIDLNDQVEGDDR**

**Confirmed sites: @S:2**

**Ambiguous sites:**

MS/MS Fragmentation of **LSSIDLNDQVEGDDR**

Found in **OBSCN\_MOUSE**, Obscurin OS=Mus musculus GN=Obscn PE=2 SV=2





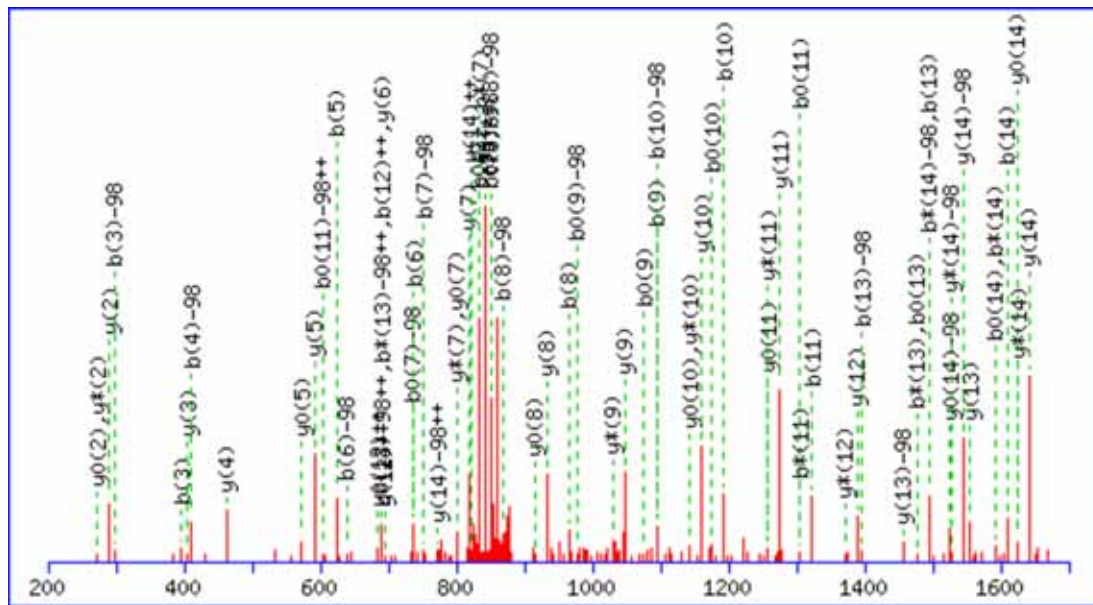

**Monoisotopic mass of neutral peptide Mr(calc): 1782.7673**

**Fixed modifications:** Carbamidomethyl (C) (apply to specified residues or termini only)

**Variable modifications:**

**N-term :** Dimethyl (N-term)

**S3 :** Phospho (ST), with neutral losses 97.9769(shown in table), 0.0000

**Ions Score:** 93 **Expect:** 1.7e-008

**Matched b ions:** b(3)-98, b(3), b(4)-98, b(5), b(6), b(6)-98, b(7)-98, b(7), b(8), b(8)-98, b(9), b(10), b(10)-98, b(11), b(12)++, b(13), b(13)-98, b(14)

**Matched y ions:** y(2), y(3), y(4), y(5), y(6), y(7), y(8), y(9), y(10), y(11), y(12), y(12)++, y(13)-98, y(13), y(14)-98, y(14), y(14)-98++, y(14)++

**Precursor origin neutral loss:** +

## Peptide No.572

**LSSIDLNDQVEGDDR**

**Confirmed sites:**

**Ambiguous sites:** @S:2orS:3

MS/MS Fragmentation of **LSSIDLNDQVEGDDR**

Found in **OBSCN\_MOUSE**, Obscurin OS=Mus musculus GN=Obscn PE=2 SV=2

Match to Query 3540: 1788.802004 from(895.408278,2+)

Title: Elution from: 45.352 to 45.352 scan no 4168 cid35.00 polarity:+:MA10

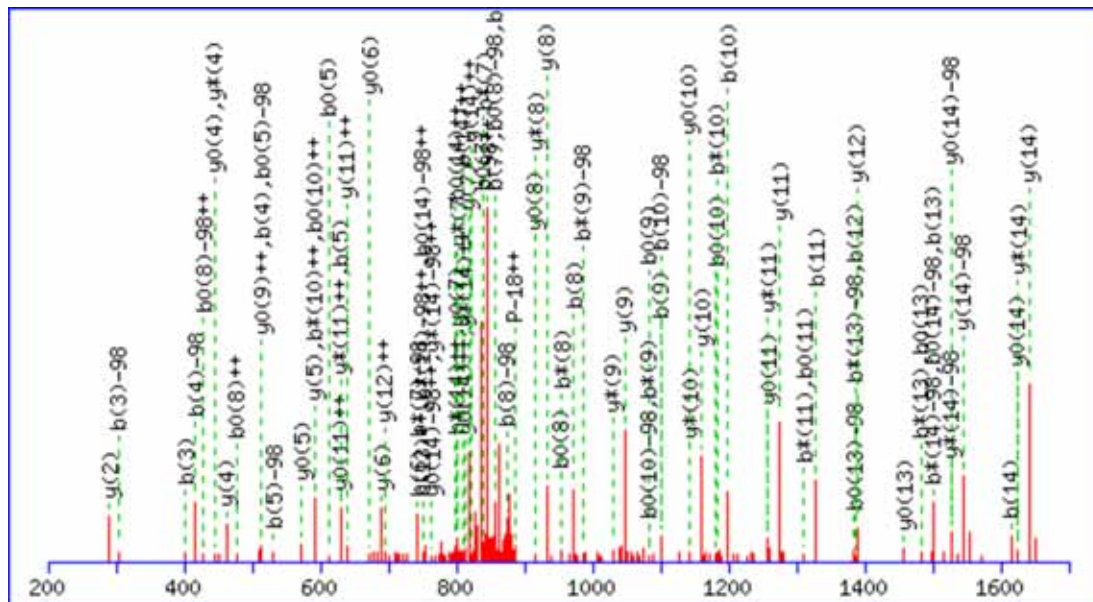

**Monoisotopic mass of neutral peptide Mr(calc):** 1788.7991

**Fixed modifications:** Carbamidomethyl (C) (apply to specified residues or termini only)

**Variable modifications:**

**N-term :** Dimethyl:2H(4)13C(2) (N-term)

**S2 :** Phospho (ST), with neutral losses 0.0000(shown in table), 97.9769

**Ions Score:** 84 **Expect:** 1.5e-007

**Matched b ions:** b(3)-98, b(3), b(4)-98, b(4), b(5), b(5)-98, b(6), b(7), b(8), b(8)-98, b(9), b(10), b(10)-98, b(11), b(12), b(13), b(13)++, b(14), b(14)++

**Matched y ions:** y(2), y(4), y(5), y(6), y(7), y(8), y(9), y(10), y(11), y(11)++, y(12), y(12)++, y(14)-98, y(14), y(14)++

**Precursor origin neutral loss:** +

## Peptide No.573

**LSSIDLNDQVEGDDR**

**Confirmed sites:** @S:3

**Ambiguous sites:**

MS/MS Fragmentation of **LSSIDLNDQVEGDDR**

Found in **OBSCN\_MOUSE**, Obscurin OS=Mus musculus GN=Obscn PE=2 SV=2

Match to Query 4873: 1788.800926 from(895.407739,2+)

Title: Elution from: 45.298 to 45.298 scan no 4345 cid35.00 polarity:+:MA10

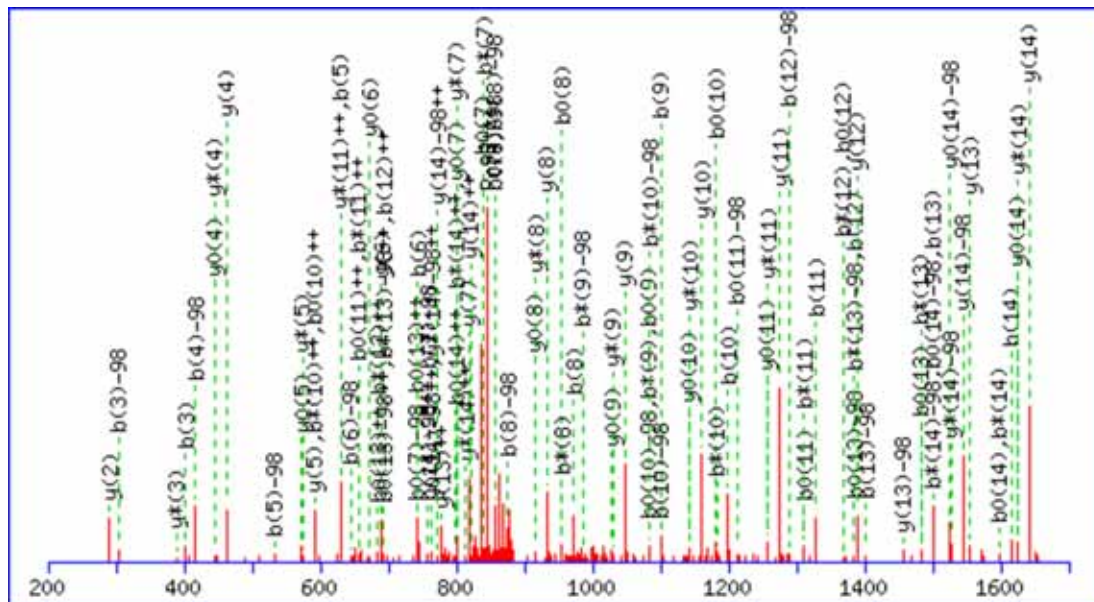

**Monoisotopic mass of neutral peptide Mr(calc):** 1788.7991

**Fixed modifications:** Carbamidomethyl (C) (apply to specified residues or termini only)

**Variable modifications:**

**N-term :** Dimethyl:2H(4)13C(2) (N-term)

**S3 :** Phospho (ST), with neutral losses 97.9769(shown in table), 0.0000

**Ions Score:** 100 **Expect:** 4.6e-009

**Matched b ions:** b(3)-98, b(3), b(4)-98, b(5), b(5)-98, b(6), b(6)-98, b(7)-98, b(7), b(8), b(8)-98, b(9), b(10), b(10)-98, b(11), b(12)-98, b(12)++, b(12), b(13), b(13)-98, b(14), b(14)-98++

**Matched y ions:** y(2), y(4), y(5), y(6), y(7), y(8), y(9), y(10), y(11), y(12), y(13)-98, y(13), y(13)++, y(14)-98, y(14), y(14)-98++, y(14)++

**Precursor origin neutral loss:** +

## Peptide No.574

**LTYTQQLEDLK**

**Confirmed sites:** @Y:3

**Ambiguous sites:**

MS/MS Fragmentation of **LTYTQQLEDLK**

Found in **MYH7\_MOUSE**, Myosin-7 OS=Mus musculus GN=Myh7 PE=1 SV=1

Match to Query 2348: 1486.733210 from(744.373881,2+)

Title: Elution from: 44.754 to 44.754 scan no 4275 cid35.00 polarity:+:MA10

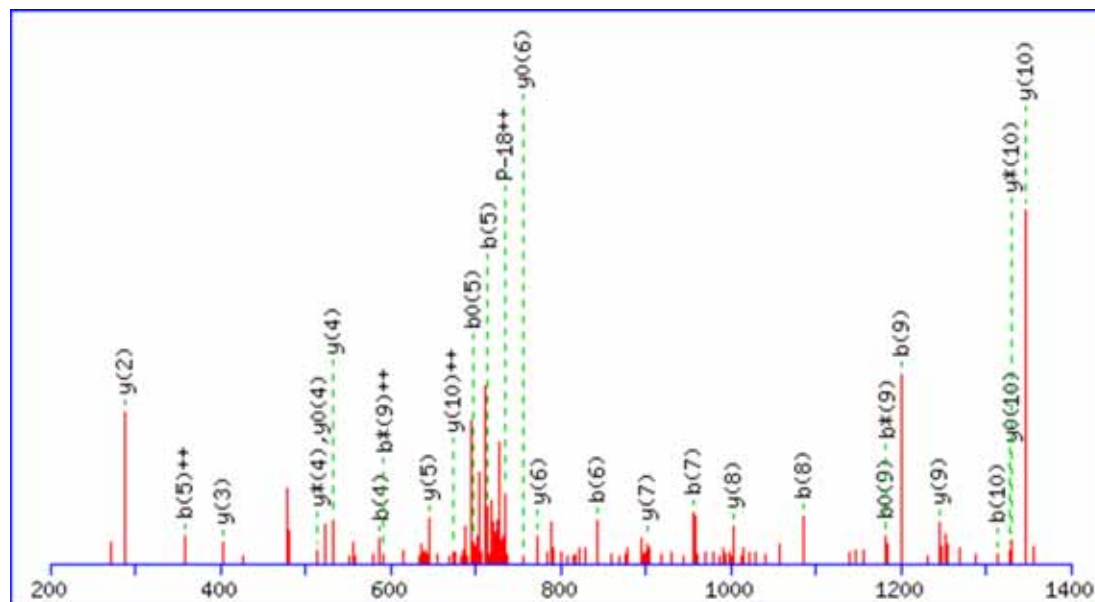

**Monoisotopic mass of neutral peptide Mr(calc):** 1486.7320

**Fixed modifications:** Carbamidomethyl (C) (apply to specified residues or termini only)

**Variable modifications:**

**N-term :** Dimethyl (N-term)

**Y3 :** Phospho (Y)

**K11 :** Dimethyl (K)

**Ions Score:** 43 **Expect:** 0.0022

**Matched b ions:** b(4), b(5)++, b(5), b(6), b(7), b(8), b(9), b(10)

**Matched y ions:** y(2), y(3), y(4), y(5), y(6), y(7), y(8), y(9), y(10), y(10)++

**Precursor origin neutral loss:** +

## Peptide No.575

**LVDSGSLAEVPK**

**Confirmed sites:** @S:4,@S:7

**Ambiguous sites:**

**MS/MS Fragmentation of** **LVDSGSLAEVPK**

Found in **STEAP3\_MOUSE**, Metalloreductase STEAP3 OS=Mus musculus GN=Steap3 PE=1 SV=1

Match to Query 2171: 1544.678566 from(773.346559,2+)

Title: Elution from: 44.513 to 44.513 scan no 4041 cid35.00 polarity:+:MA10



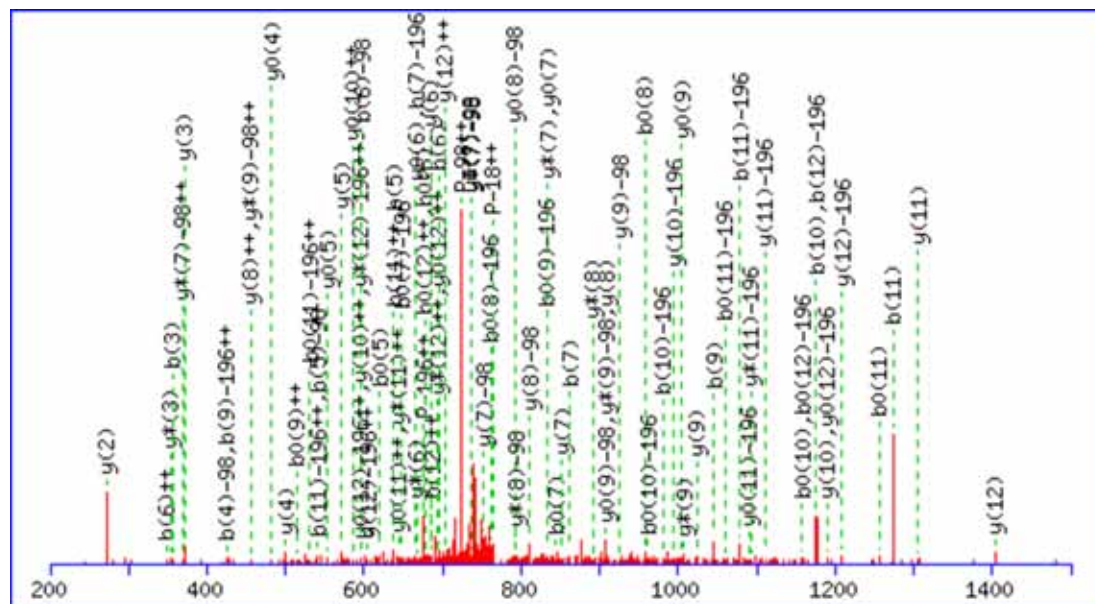

**Monoisotopic mass of neutral peptide Mr(calc):** 1544.6776

**Fixed modifications:** Carbamidomethyl (C) (apply to specified residues or termini only)

**Variable modifications:**

**N-term :** Dimethyl (N-term)

**S4 :** Phospho (ST), with neutral losses 0.0000(shown in table), 97.9769

**S7 :** Phospho (ST), with neutral losses 0.0000(shown in table), 97.9769

**K13 :** Dimethyl (K)

**Ions Score:** 30 **Expect:** 0.029

**Matched b ions:** b(3), b(4)-98, b(5), b(5)-98, b(6)++, b(6)-98, b(6), b(7)-98, b(7)-196, b(7), b(8)-98, b(9), b(9)-196++, b(9)-98, b(10), b(10)-98, b(10)-98++, b(10)-196, b(11)++, b(11), b(11)-98, b(11)-196++, b(11)-196, b(12)-196, b(12)-98, b(12)-98++, b(12)++

**Matched y ions:** y(2), y(3), y(4), y(5), y(6), y(7)-98, y(7), y(8), y(8)-98, y(8)++, y(9), y(9)-98, y(10), y(10)++, y(10)-196, y(10)-98, y(11)-98, y(11), y(11)-98++, y(11)-196, y(12), y(12)-98, y(12)-196, y(12)-196++, y(12)++

**Precursor origin neutral loss:** +

## Peptide No.576

**LVIIESDLER**

**Confirmed sites:** @S:6

**Ambiguous sites:**

**MS/MS Fragmentation of LVIIESDLER**

Found in **TPM1\_MOUSE**, Tropomyosin alpha-1 chain OS=Mus musculus GN=Tpm1 PE=1 SV=1

Match to Query 1252: 1293.659410 from(647.836981,2+)

Title: Elution from: 50.416 to 50.416 scan no 4589 cid35.00 polarity:+:MA10

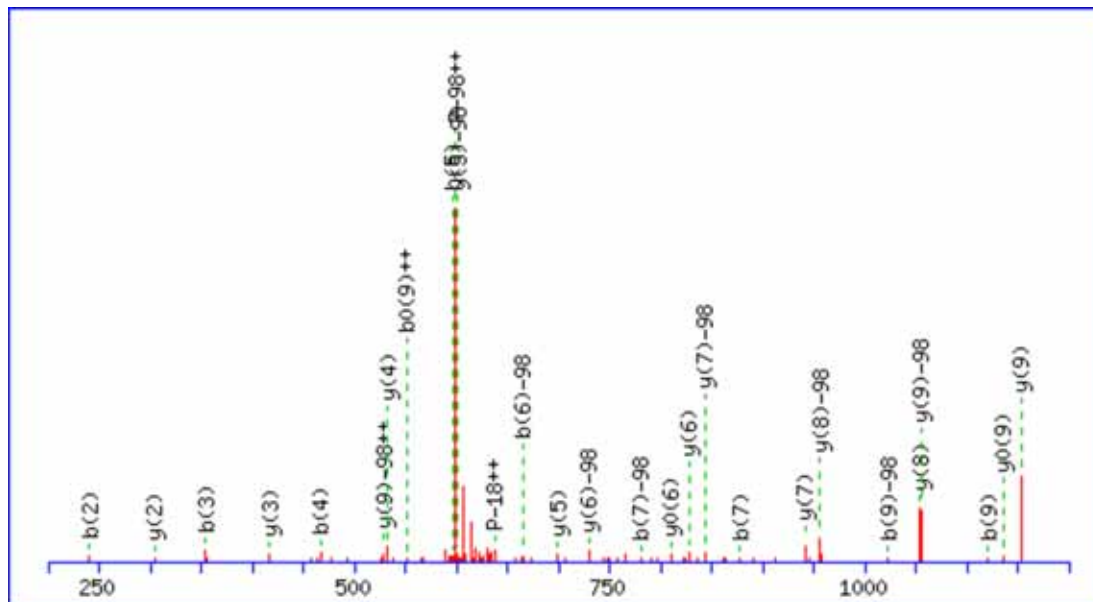

**Monoisotopic mass of neutral peptide Mr(calc):** 1293.6581

**Fixed modifications:** Carbamidomethyl (C) (apply to specified residues or termini only)

**Variable modifications:**

**N-term :** Dimethyl (N-term)

**S6 :** Phospho (ST), with neutral losses 97.9769(shown in table), 0.0000

**Ions Score:** 56 **Expect:** 9.4e-005

**Matched b ions:** b(2), b(3), b(4), b(5), b(6)-98, b(7), b(7)-98, b(9)-98, b(9)

**Matched y ions:** y(2), y(3), y(4), y(5), y(5)-98, y(6)-98, y(6), y(7)-98, y(7), y(8)-98, y(8), y(9), y(9)-98, y(9)-98++

**Precursor origin neutral loss:** +

## Peptide No.577

**LVRPLYSVEVMETETAR**

**Confirmed sites:** @S:7

**Ambiguous sites:**

MS/MS Fragmentation of **LVRPLYSVEVMETETAR**

Found in **TITIN\_MOUSE**, Titin OS=Mus musculus GN=Ttn PE=1 SV=1

Match to Query 5293: 2116.028811 from(706.350213,3+)

Title: Elution from: 45.852 to 45.852 scan no 4189 cid35.00 polarity:+:MA10:m1s

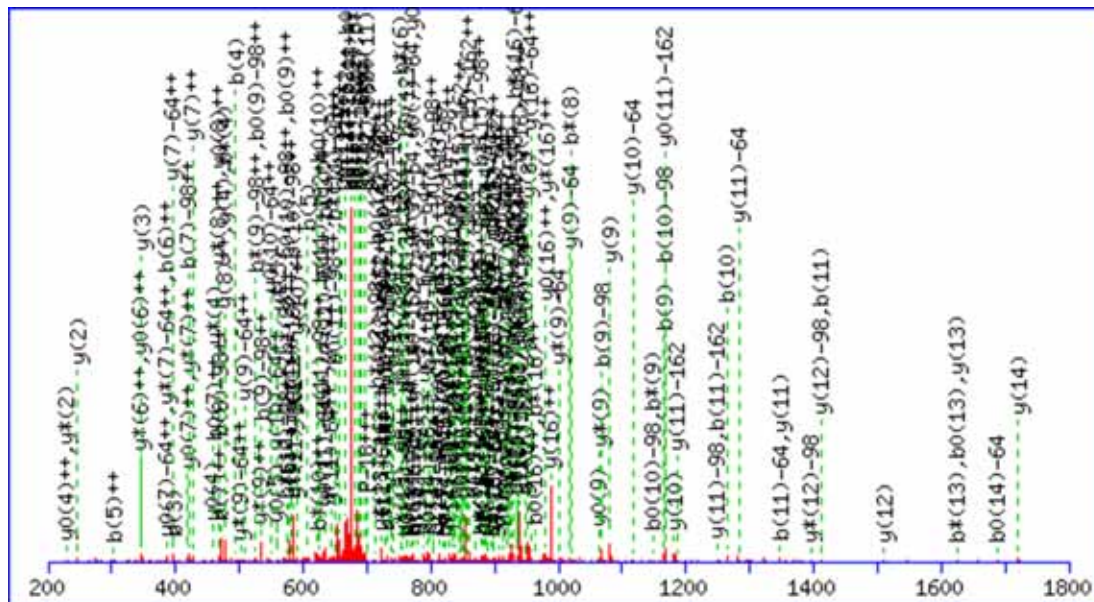

**Monoisotopic mass of neutral peptide Mr(calc):** 2116.0275

**Fixed modifications:** Carbamidomethyl (C) (apply to specified residues or termini only)

**Variable modifications:**

**N-term :** Dimethyl (N-term)

**S7 :** Phospho (ST), with neutral losses 0.0000(shown in table), 97.9769

**M11 :** Oxidation (M), with neutral losses 0.0000(shown in table), 63.9983

**Ions Score:** 70 **Expect:** 7.1e-006

**Matched b ions:** b(3), b(4), b(5)++, b(5), b(6)++, b(6), b(7)++, b(7)-98++, b(7)-98, b(7), b(8)-98++, b(8)-98, b(9)++, b(9)-98, b(9)-98++, b(9), b(10)-98++, b(10)-98, b(10), b(10)++, b(11), b(11)-98++, b(12)-98++, b(12)++, b(13)-98++, b(13)++, b(14)++, b(14)-98++, b(15)-98++, b(15)++, b(16)-98++

**Matched y ions:** y(2), y(3), y(4), y(5), y(7), y(7)++, y(8)++, y(8), y(9), y(10), y(10)++, y(11)++, y(11), y(11)-98, y(11)-98++, y(12), y(12)-98, y(12)++, y(13), y(13)++, y(13)-98++, y(14), y(14)++, y(14)-98++, y(15)++, y(15)-98++, y(16)++, y(16)-98++

**Precursor origin neutral loss:** +

## Peptide No.578

**LVRPLYSVEVMETETAR**

**Confirmed sites: @S:7**

**Ambiguous sites:**

MS/MS Fragmentation of **LVRPLYSVEVMETETAR**

Found in **TITIN\_MOUSE**, Titin OS=Mus musculus GN=Ttn PE=1 SV=1

Match to Query 6940: 2100.033930 from(701.018586,3+)

Title: Elution from: 51.985 to 51.985 scan no 5196 cid35.00 polarity:+:MA10:m1s

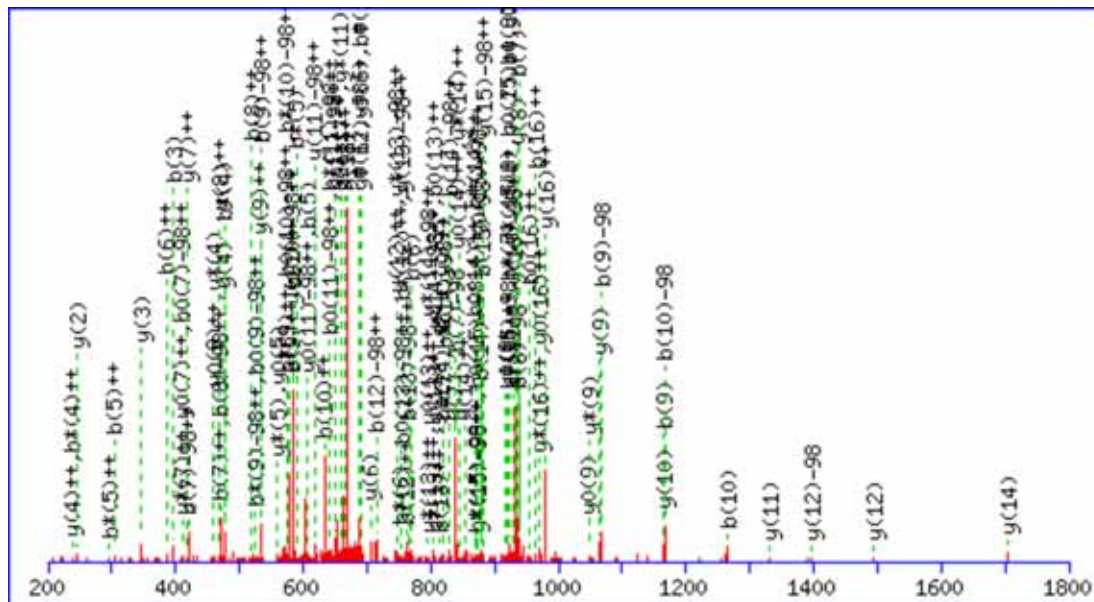

**Monoisotopic mass of neutral peptide Mr(calc):** 2100.0326

**Fixed modifications:** Carbamidomethyl (C) (apply to specified residues or termini only)

**Variable modifications:**

**N-term :** Dimethyl (N-term)

**S7 :** Phospho (ST), with neutral losses 0.0000(shown in table), 97.9769

**Ions Score:** 61 **Expect:** 5.6e-005

**Matched b ions:** b(3), b(5)++, b(5), b(6)++, b(6), b(7)++, b(7)-98++, b(7)-98, b(7), b(8)-98++, b(8)-98, b(8)++, b(9)++, b(9)-98, b(9), b(9)-98++, b(10)-98++, b(10)-98, b(10), b(10)++, b(11)-98++, b(12)-98++, b(12)++, b(13)-98++, b(13)++, b(14)++, b(14)-98++, b(15)-98++, b(15)++, b(16)++

**Matched y ions:** y(2), y(3), y(4), y(4)++, y(5), y(6), y(7), y(7)++, y(8), y(8)++, y(9), y(9)++, y(10)++, y(10), y(11), y(11)-98++, y(11)++, y(12), y(12)-98, y(12)++, y(13)++, y(13)-98++, y(14), y(14)++, y(14)-98++, y(15)-98++, y(16)-98++, y(16)++

**Precursor origin neutral loss:** +

## Peptide No.579

**LVRPLYSVEVMETETAR**

**Confirmed sites:** @S:7

**Ambiguous sites:**

**MS/MS Fragmentation of LVRPLYSVEVMETETAR**

Found in **TITIN\_MOUSE**, Titin OS=Mus musculus GN=Ttn PE=1 SV=1

Match to Query 4915: 2122.062894 from(708.361574,3+)

Title: Elution from: 46.215 to 46.215 scan no 4143 cid35.00 polarity:+:MA10:m1s



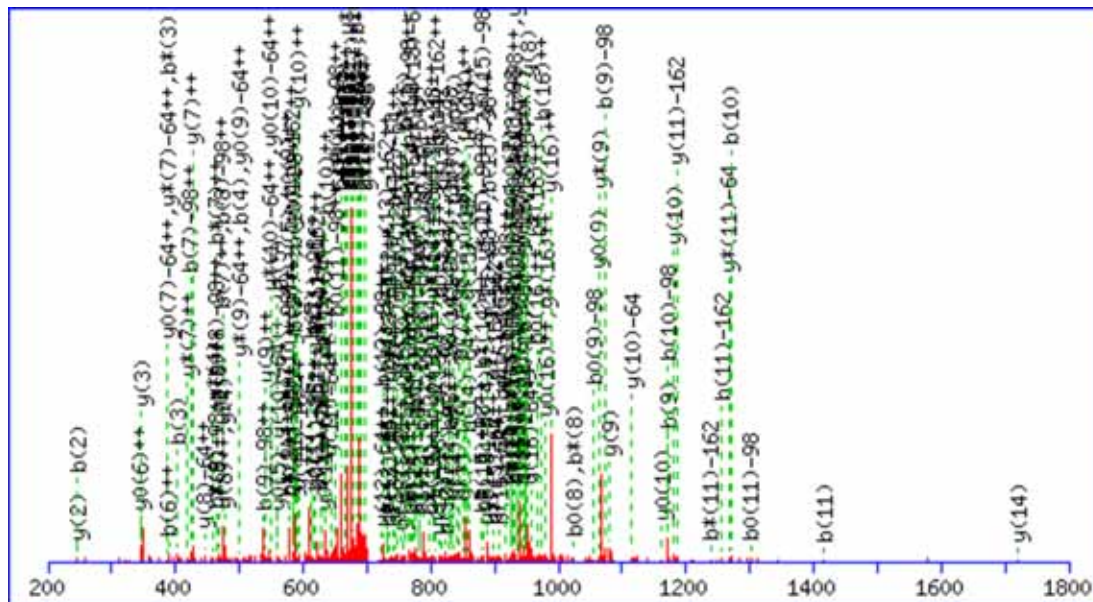

**Monoisotopic mass of neutral peptide Mr(calc):** 2122.0593

**Fixed modifications:** Carbamidomethyl (C) (apply to specified residues or termini only)

**Variable modifications:**

**N-term :** Dimethyl:2H(4)13C(2) (N-term)

**S7 :** Phospho (ST), with neutral losses 0.0000(shown in table), 97.9769

**M11 :** Oxidation (M), with neutral losses 0.0000(shown in table), 63.9983

**Ions Score:** 39 **Expect:** 0.0084

**Matched b ions:** b(2), b(3), b(4), b(5), b(6)++, b(6), b(7)++, b(7)-98++, b(7)-98, b(7), b(8)-98++, b(8)-98, b(9), b(9)-98++, b(9)++, b(9)-98, b(10), b(10)-98++, b(10)-98, b(10)++, b(11), b(11)-98++, b(12)++, b(12)-98++, b(13)-98++, b(13)++, b(14)-98++, b(14)++, b(15)++, b(15)-98++, b(16)-98++, b(16)++

**Matched y ions:** y(2), y(3), y(4), y(5), y(7), y(7)++, y(8), y(8)++, y(9), y(9)++, y(10), y(10)++, y(11)++, y(12)++, y(13)++, y(14), y(14)++, y(14)-98++, y(15)++, y(15)-98++, y(16)-98++, y(16)++

**Precursor origin neutral loss:** +

## Peptide No.580

**LVRPLYSVEVMETETAR**

**Confirmed sites:** @S:7

**Ambiguous sites:**

**MS/MS Fragmentation of LVRPLYSVEVMETETAR**

Found in **TITIN\_MOUSE**, Titin OS=Mus musculus GN=Ttn PE=1 SV=1

Match to Query 4881: 2106.066156 from(703.029328,3+)

Title: Elution from: 52.303 to 52.303 scan no 4865 cid35.00 polarity:+:MA10:m1s

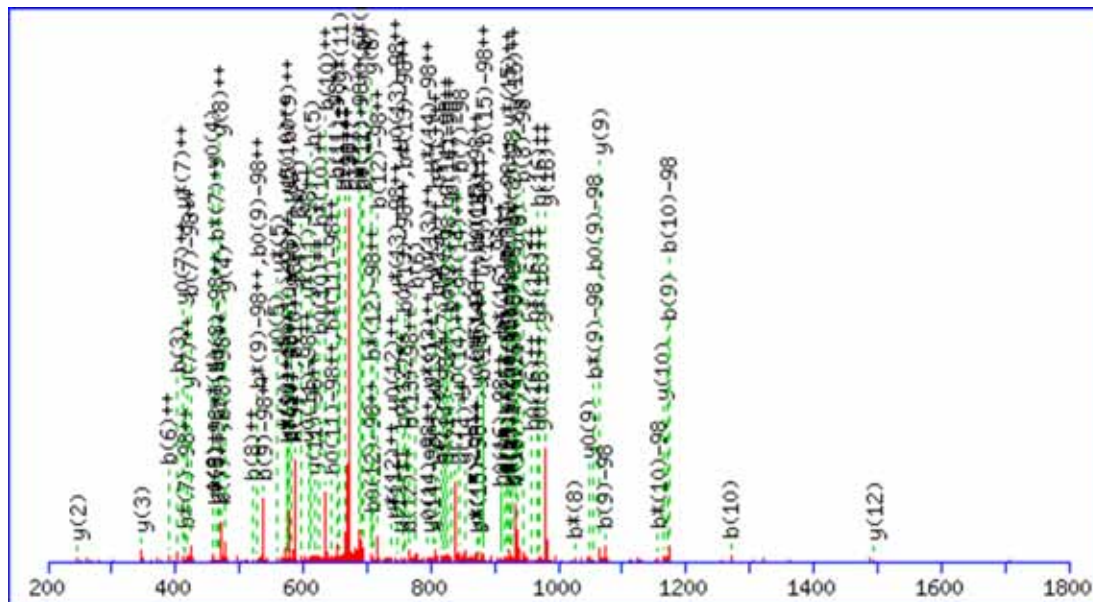

**Monoisotopic mass of neutral peptide Mr(calc):** 2106.0644

**Fixed modifications:** Carbamidomethyl (C) (apply to specified residues or termini only)

**Variable modifications:**

**N-term :** Dimethyl:2H(4)13C(2) (N-term)

**S7 :** Phospho (ST), with neutral losses 0.0000(shown in table), 97.9769

**Ions Score:** 42 **Expect:** 0.0046

**Matched b ions:** b(3), b(5), b(6)++, b(6), b(7)-98++, b(7)++, b(7)-98, b(8)-98++, b(8)-98, b(8)++, b(9)-98++, b(9)++, b(9)-98, b(9), b(10)-98++, b(10)-98, b(10), b(10)++, b(11)-98++, b(12)++, b(12)-98++, b(13)-98++, b(13)++, b(14)-98++, b(14)++, b(15)++, b(15)-98++, b(16)-98++, b(16)++

**Matched y ions:** y(2), y(3), y(4), y(5), y(6), y(7), y(7)++, y(8), y(8)++, y(9), y(10), y(10)++, y(11)-98++, y(11)++, y(12), y(12)++, y(13)++, y(14)++, y(14)-98++, y(15)++, y(15)-98++, y(16)-98++, y(16)++

**Precursor origin neutral loss:** +

## Peptide No.581

**LVRPLYSVEVMETETAR**

**Confirmed sites:** @Y:6

**Ambiguous sites:**

**MS/MS Fragmentation of LVRPLYSVEVMETETAR**

Found in **TITIN\_MOUSE**, Titin OS=Mus musculus GN=Ttn PE=1 SV=1

Match to Query 5415: 2106.063483 from(703.028437,3+)

Title: Elution from: 52.036 to 52.036 scan no 4965 cid35.00 polarity:+MA10:m1s

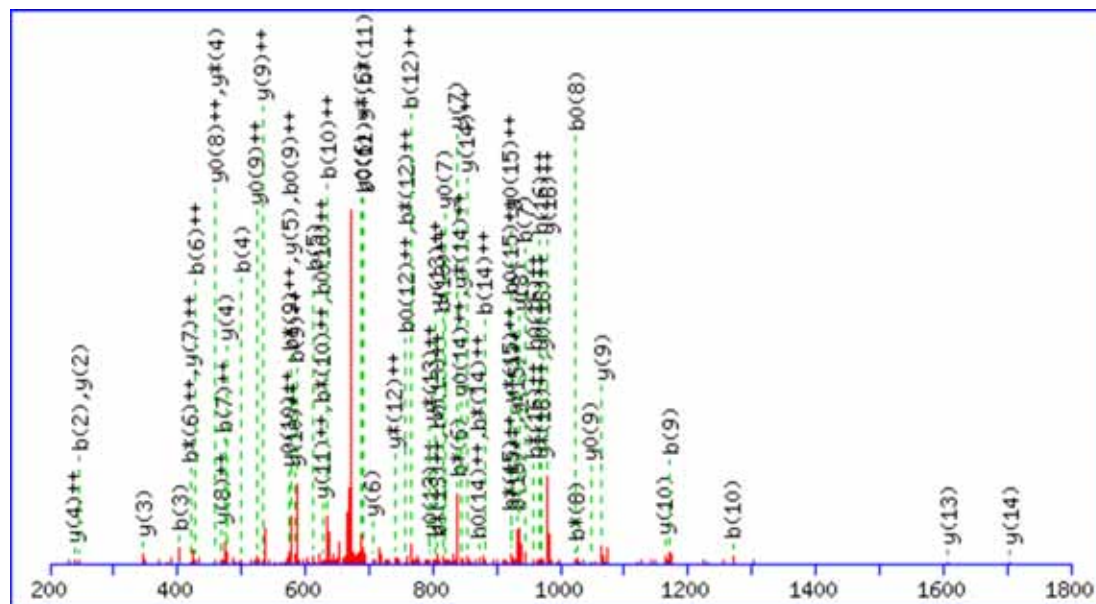

**Monoisotopic mass of neutral peptide Mr(calc):** 2106.0644

**Fixed modifications:** Carbamidomethyl (C) (apply to specified residues or termini only)

**Variable modifications:**

**N-term :** Dimethyl:2H(4)13C(2) (N-term)

**Y6 :** Phospho (Y)

**Ions Score:** 59 **Expect:** 8.6e-005

**Matched b ions:** b(2), b(3), b(4), b(5), b(6)++, b(7)++, b(7), b(9)++, b(9), b(10), b(10)++, b(12)++, b(13)++, b(14)++, b(15)++, b(16)++

**Matched y ions:** y(2), y(3), y(4)++, y(4), y(5), y(6), y(7), y(7)++, y(8), y(8)++, y(9), y(9)++, y(10), y(10)++, y(11)++, y(13), y(13)++, y(14), y(14)++, y(15)++, y(16)++

**Precursor origin neutral loss:** +

## Peptide No.582

**LYVVDSINDLNK**

**Confirmed sites:** @S:6

**Ambiguous sites:**

MS/MS Fragmentation of **LYVVDSINDLNK**

Found in **CG053\_MOUSE**, Coiled-coil domain-containing transmembrane protein C7orf53 homolog  
 OS=Mus musculus GN=Gm889 PE=2 SV=1

Match to Query 2704: 1527.759180 from(764.886866,2+)

Title: Elution from: 51.317 to 51.317 scan no 5068 cid35.00 polarity:+MA10

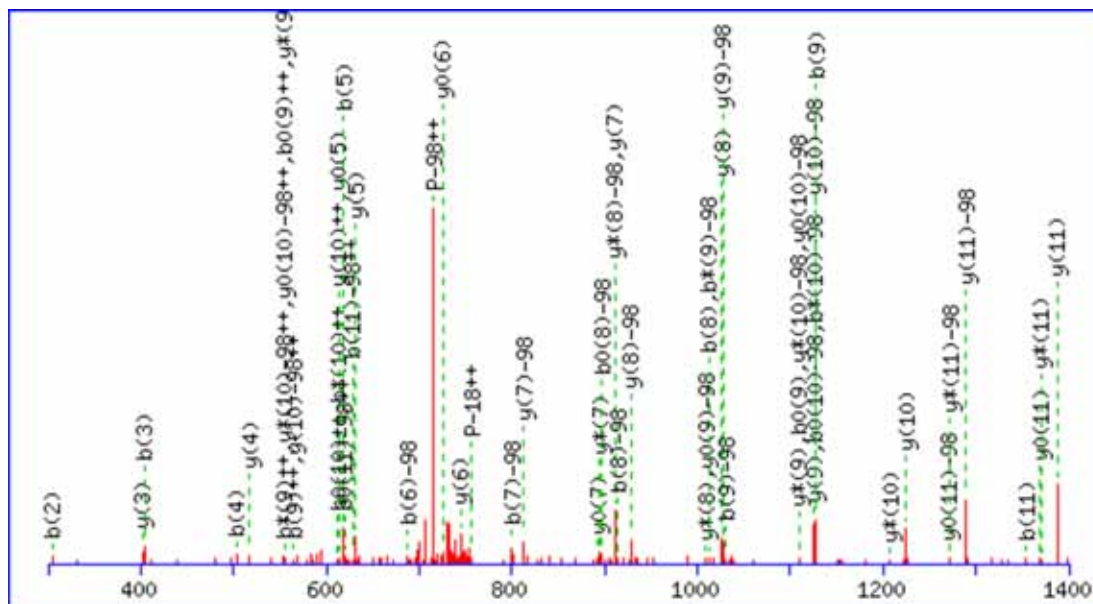

**Monoisotopic mass of neutral peptide Mr(calc):** 1527.7585

**Fixed modifications:** Carbamidomethyl (C) (apply to specified residues or termini only)

**Variable modifications:**

**N-term :** Dimethyl (N-term)

**S6 :** Phospho (ST), with neutral losses 97.9769(shown in table), 0.0000

**K12 :** Dimethyl (K)

**Ions Score:** 48 **Expect:** 0.00073

**Matched b ions:** b(2), b(3), b(4), b(5), b(6)-98, b(7)-98, b(8), b(8)-98, b(9), b(9)-98, b(9)++, b(11), b(11)-98++

**Matched y ions:** y(3), y(4), y(5), y(6), y(7)-98, y(7), y(8), y(8)-98, y(9)-98, y(9), y(10)-98, y(10), y(10)-98++, y(10)++, y(11)-98, y(11)

**Precursor origin neutral loss:** +

## Peptide No.583

**LYVVDSINDLNK**

**Confirmed sites:** @S:6

**Ambiguous sites:**

MS/MS Fragmentation of **LYVVDSINDLNK**

Found in **CG053\_MOUSE**, Coiled-coil domain-containing transmembrane protein C7orf53 homolog  
OS=Mus musculus GN=Gm889 PE=2 SV=1

Match to Query 1851: 1539.822626 from(770.918589,2+)

Title: Elution from: 51.272 to 51.272 scan no 4743 cid35.00 polarity:+:MA10



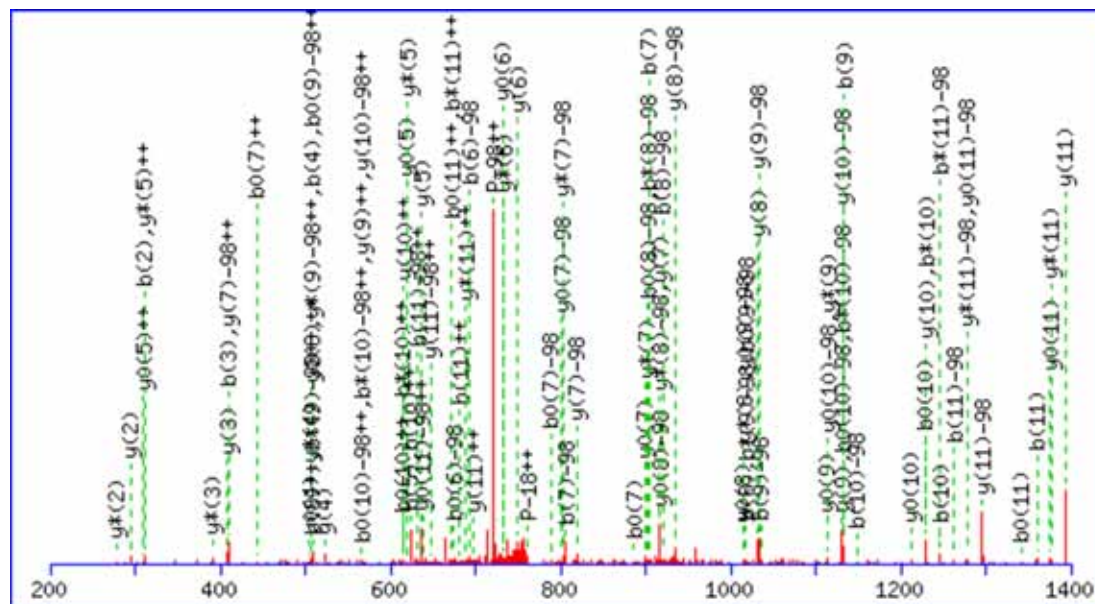

**Monoisotopic mass of neutral peptide Mr(calc):** 1539.8222

**Fixed modifications:** Carbamidomethyl (C) (apply to specified residues or termini only)

**Variable modifications:**

**N-term :** Dimethyl:2H(4)13C(2) (N-term)

**S6 :** Phospho (ST), with neutral losses 97.9769(shown in table), 0.0000

**K12 :** Dimethyl:2H(4)13C(2) (K)

**Ions Score:** 81 **Expect:** 3.1e-007

**Matched b ions:** b(2), b(3), b(4), b(5), b(6)-98, b(7)-98, b(7), b(8)++, b(8)-98, b(8), b(9), b(9)-98, b(10)++, b(10), b(10)-98, b(11), b(11)-98, b(11)-98++, b(11)++

**Matched y ions:** y(2), y(3), y(4), y(5), y(6), y(7)-98++, y(7), y(7)-98, y(8)-98, y(8), y(9)-98, y(9), y(9)++, y(10), y(10)-98, y(10)-98++, y(10)++, y(11)-98, y(11), y(11)-98++, y(11)++

**Precursor origin neutral loss:** +

## Peptide No.584

**MAKTYDYLFK**

**Confirmed sites:** @T:4,@Y:7

**Ambiguous sites:**

**MS/MS Fragmentation of MAKTYDYLFK**

Found in **RAB8A\_MOUSE**, Ras-related protein Rab-8A OS=Mus musculus GN=Rab8a PE=1 SV=2

Match to Query 2551: 1510.618728 from(756.316640,2+)

Title: Elution from: 54.468 to 54.468 scan no 5403 cid35.00 polarity:+MA10

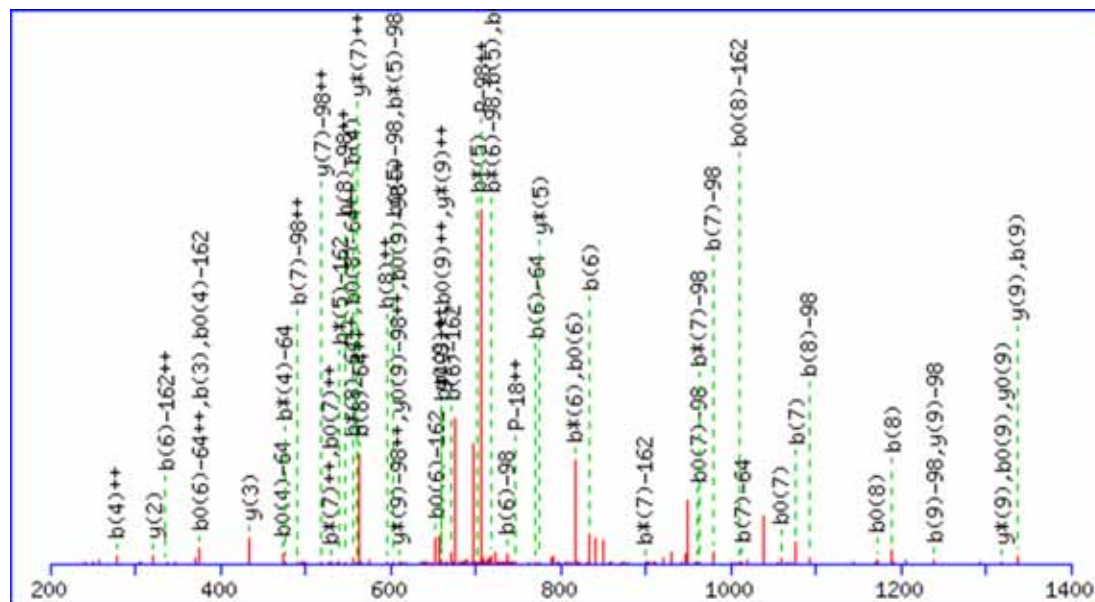

**Monoisotopic mass of neutral peptide Mr(calc):** 1510.6220

**Fixed modifications:** Carbamidomethyl (C) (apply to specified residues or termini only)

**Variable modifications:**

**N-term :** Dimethyl (N-term)

**M1 :** Oxidation (M), with neutral losses 0.0000(shown in table), 63.9983

**T4 :** Phospho (ST), with neutral losses 0.0000(shown in table), 97.9769

**Y7 :** Phospho (Y)

**K10 :** Dimethyl (K)

**Ions Score:** 27 **Expect:** 0.032

**Matched b ions:** b(3), b(4)++, b(4), b(5), b(6), b(6)-98, b(7), b(7)-98, b(7)-98++, b(8), b(8)-98, b(8)-98++, b(8)++, b(9), b(9)-98

**Matched y ions:** y(2), y(3), y(7)-98++, y(9), y(9)-98

**Precursor origin neutral loss:** +

## Peptide No.585

**MFDAAKSPTSQ**

**Confirmed sites:** @S:7

**Ambiguous sites:**

**MS/MS Fragmentation of MFDAAKSPTSQ**

Found in **TNNI1\_MOUSE**, Troponin I, slow skeletal muscle OS=Mus musculus GN=Tnni1 PE=2 SV=3

Match to Query 1211: 1333.562994 from(667.788773,2+)

Title: Elution from: 26.466 to 26.466 scan no 1645 cid35.00 polarity:+:MA10



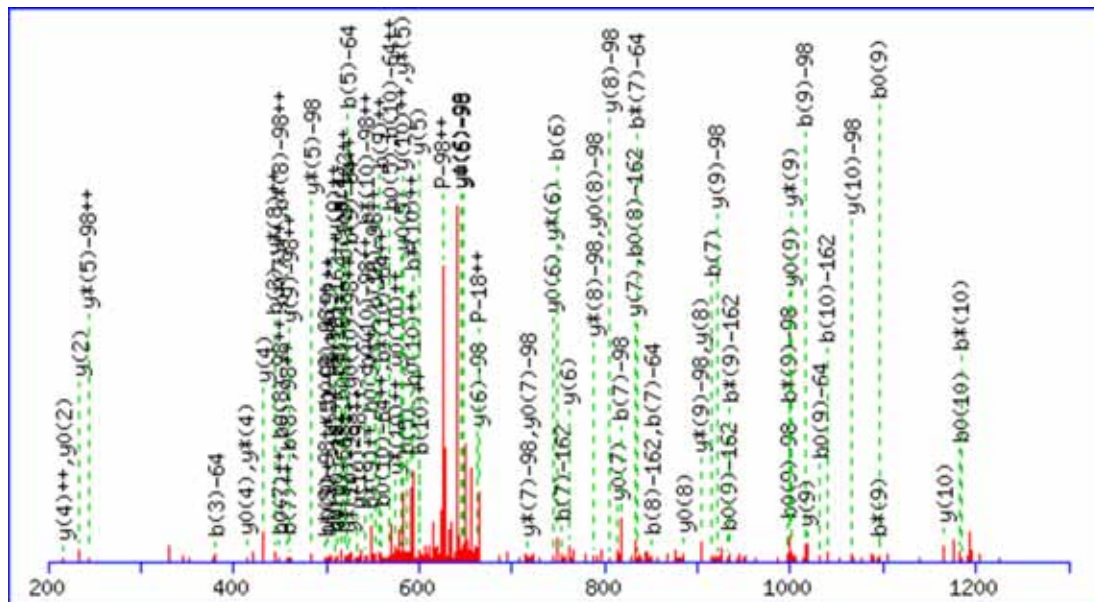

**Monoisotopic mass of neutral peptide Mr(calc):** 1345.6261

**Fixed modifications:** Carbamidomethyl (C) (apply to specified residues or termini only)

**Variable modifications:**

**N-term :** Dimethyl:2H(4)13C(2) (N-term)

**M1 :** Oxidation (M), with neutral losses 0.0000(shown in table), 63.9983

**K6 :** Dimethyl:2H(4)13C(2) (K)

**S7 :** Phospho (ST), with neutral losses 0.0000(shown in table), 97.9769

**Ions Score:** 37 **Expect:** 0.0058

**Matched b ions:** b(3), b(4), b(5), b(6), b(7)-98, b(7)++, b(7), b(8)-98++, b(9)-98, b(9)++, b(10)-98++, b(10)++

**Matched y ions:** y(2), y(4), y(4)++, y(5)-98, y(5), y(6), y(6)-98, y(7), y(8), y(8)-98, y(9), y(9)-98++, y(9)++, y(9)-98, y(10)++, y(10), y(10)-98, y(10)-98++

**Precursor origin neutral loss:** +

## Peptide No.587

**MFVSGEAVSAYSSAMR**

**Confirmed sites:** @S:4,@S:13

**Ambiguous sites:** @Y:11orS:12

MS/MS Fragmentation of **MFVSGEAVSAYSSAMR**

Found in **DSEL\_MOUSE**, Dermatan-sulfate epimerase-like protein OS=Mus musculus GN=Dsel PE=2 SV=1

Match to Query 5496: 1975.693590 from(988.854071,2+)

Title: Elution from: 69.021 to 69.021 scan no 6678 cid35.00 polarity:+:MA10



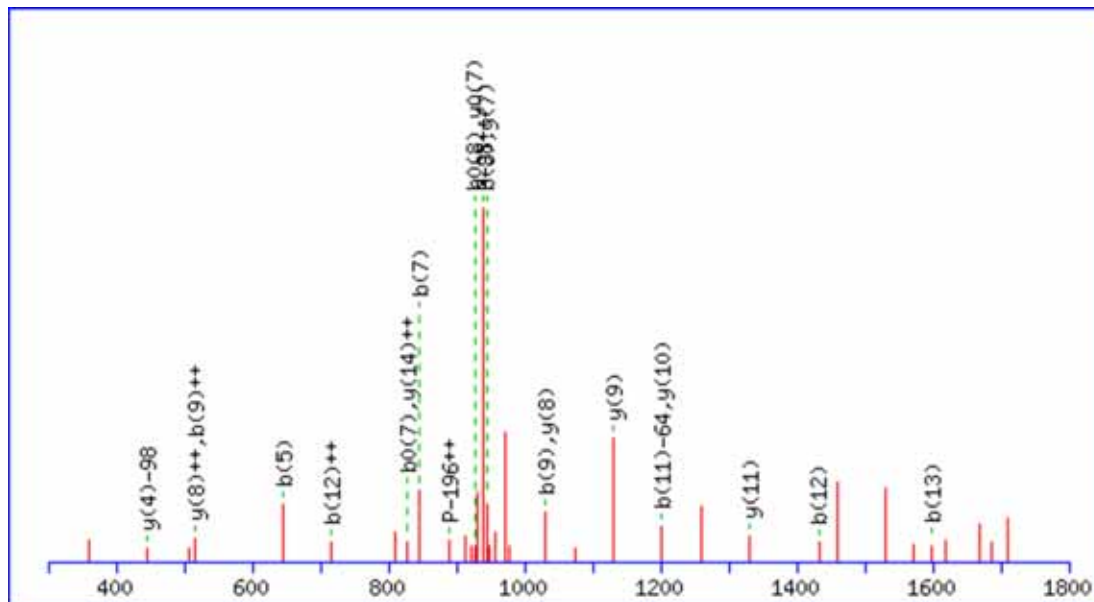

**Monoisotopic mass of neutral peptide Mr(calc):** 1975.6899

**Fixed modifications:** Carbamidomethyl (C) (apply to specified residues or termini only)

**Variable modifications:**

**N-term :** Dimethyl (N-term)

**M1 :** Oxidation (M), with neutral losses 0.0000(shown in table), 63.9983

**S4 :** Phospho (ST), with neutral losses 0.0000(shown in table), 97.9769

**S12 :** Phospho (ST), with neutral losses 0.0000(shown in table), 97.9769

**S13 :** Phospho (ST), with neutral losses 0.0000(shown in table), 97.9769

**Ions Score:** 22 **Expect:** 0.053

**Matched b ions:** b(5), b(7), b(8), b(9)++, b(9), b(12)++, b(12), b(13)

**Matched y ions:** y(4)-98, y(7), y(8)++, y(8), y(9)-98++, y(9), y(10), y(11), y(12)-98++, y(14)++

**Precursor origin neutral loss:** +

## Peptide No.588

**MLAESDDSGDEESVSQTDK**

**Confirmed sites:** @S:5,@S:8

**Ambiguous sites:**

MS/MS Fragmentation of **MLAESDDSGDEESVSQTDK**

Found in **OSBP1\_MOUSE**, Oxysterol-binding protein 1 OS=Mus musculus GN=Osbp PE=1 SV=2

Match to Query 6961: 2273.819012 from(1137.916782,2+)

Title: Elution from: 32.035 to 32.035 scan no 2584 cid35.00 polarity:+:MA10:m1s



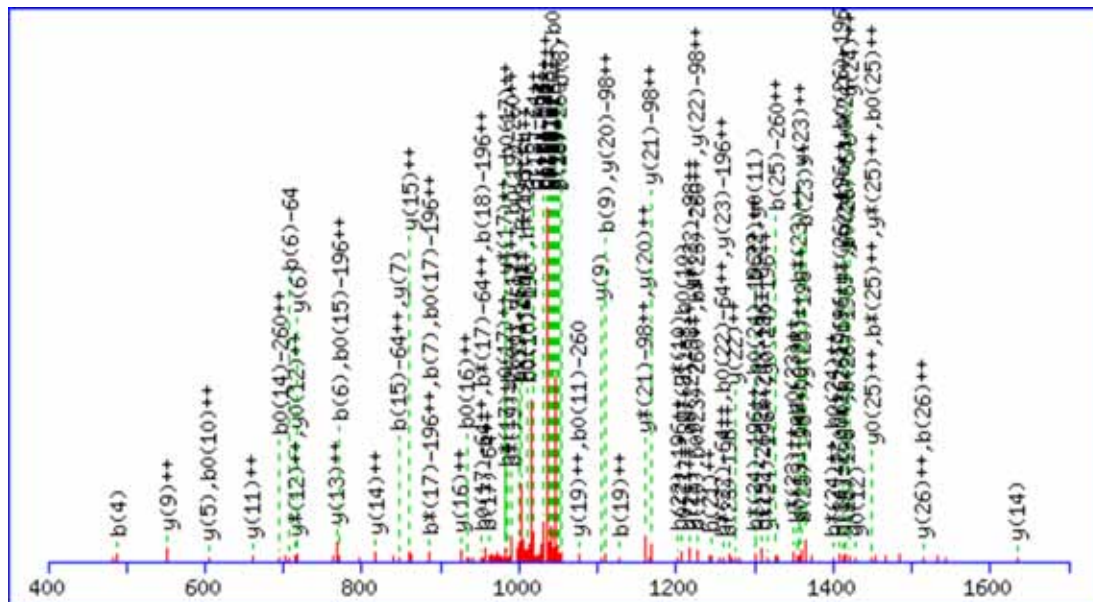

**Monoisotopic mass of neutral peptide Mr(calc):** 3202.3149

**Fixed modifications:** Carbamidomethyl (C) (apply to specified residues or termini only)

**Variable modifications:**

**N-term :** Dimethyl (N-term)

**M1 :** Oxidation (M), with neutral losses 0.0000(shown in table), 63.9983

**S5 :** Phospho (ST), with neutral losses 97.9769(shown in table), 0.0000

**S8 :** Phospho (ST), with neutral losses 97.9769(shown in table), 0.0000

**K19 :** Dimethyl (K)

**Ions Score:** 60 **Expect:** 7.9e-005

**Matched b ions:** b(4), b(6), b(7), b(8)-98, b(8), b(9), b(10), b(10)-196, b(10)-98, b(18)-196++, b(18)++, b(19)++, b(19)-196++, b(21)++, b(22)++, b(22)-196++, b(23)++, b(23)-196++, b(23)-98++, b(24)-196++, b(24)++, b(25)-98++, b(25)-196++, b(26)-196++, b(26)++, b(26)-98++

**Matched y ions:** y(5), y(6), y(7), y(9)++, y(9), y(11)++, y(13)++, y(14), y(14)++, y(15)++, y(16)++, y(17)++, y(18)++, y(19)++, y(20)++, y(20)-98++, y(21)++, y(21)-98++, y(22)-98++, y(22)++, y(23)-98++, y(23)-196++, y(23)++, y(24)++, y(24)-98++, y(25)-98++, y(25)-196++, y(26)-196++, y(26)++, y(26)-98++

**Precursor origin neutral loss:** +

## Peptide No.590

**MLDAEDIVNTPKPDER**

**Confirmed sites:** @T:10

**Ambiguous sites:**

MS/MS Fragmentation of **MLDAEDIVNTPKPDER**

Found in **ACTN2\_MOUSE**, Alpha-actinin-2 OS=Mus musculus GN=Actn2 PE=1 SV=1

Match to Query 5556: 1993.908390 from(665.643406,3+)

Title: Elution from: 39.490 to 39.490 scan no 3598 cid35.00 polarity:+:MA10





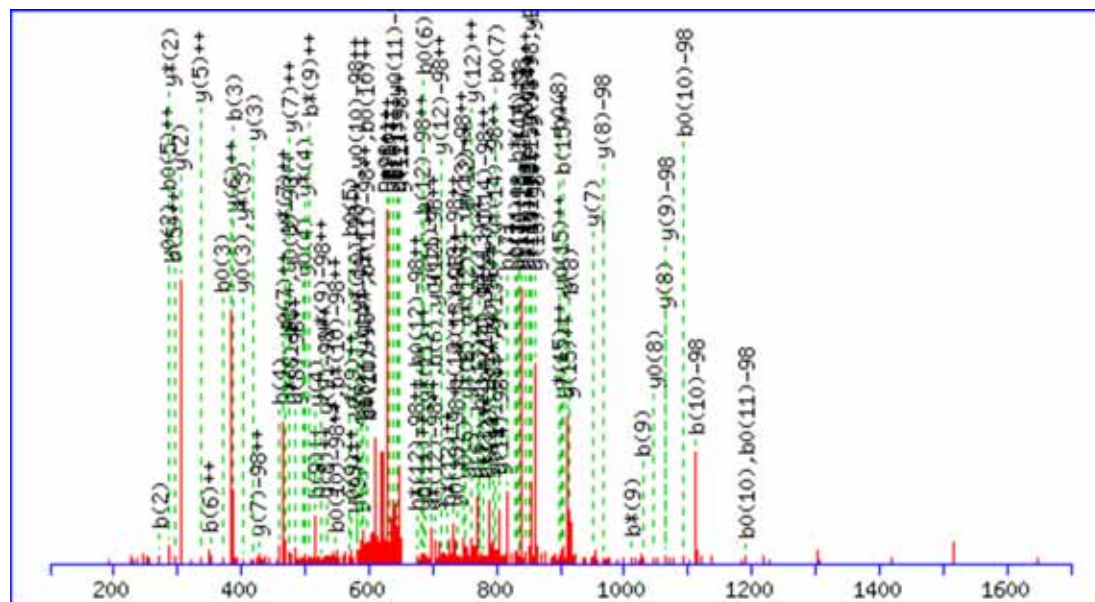

**Monoisotopic mass of neutral peptide Mr(calc):** 1977.9118

**Fixed modifications:** Carbamidomethyl (C) (apply to specified residues or termini only)

**Variable modifications:**

**N-term :** Dimethyl (N-term)

**T10 :** Phospho (ST), with neutral losses 97.9769(shown in table), 0.0000

**K12 :** Dimethyl (K)

**Ions Score:** 37 **Expect:** 0.013

**Matched b ions:** b(2), b(3), b(4), b(5), b(5)++, b(6)++, b(6), b(7), b(8), b(9), b(9)++, b(10)-98, b(12)++, b(12)-98++, b(13)-98++, b(13)++, b(14)++, b(14)-98++, b(15)-98++, b(15)++

**Matched y ions:** y(2), y(3), y(4), y(5)++, y(6), y(6)++, y(7)++, y(7)-98++, y(7)-98, y(7), y(8), y(8)-98++, y(8)++, y(8)-98, y(9)-98, y(9)++, y(9)-98++, y(10)-98++, y(10)++, y(11)++, y(11)-98++, y(12)++, y(12)-98++, y(13)-98++, y(13)++, y(14)++, y(14)-98++, y(15)++, y(15)-98++

**Precursor origin neutral loss:** +

## Peptide No.592

**MPSIPEEPEHGDLER**

**Confirmed sites:** @S:3

**Ambiguous sites:**

**MS/MS Fragmentation of MPSIPEEPEHGDLER**

Found in **SPEG\_MOUSE**, Striated muscle-specific serine/threonine-protein kinase OS=Mus musculus  
GN=Speg PE=1 SV=2

Match to Query 3704: 1858.782315 from(620.601381,3+)

Title: Elution from: 36.027 to 36.027 scan no 2913 cid35.00 polarity:+:MA10

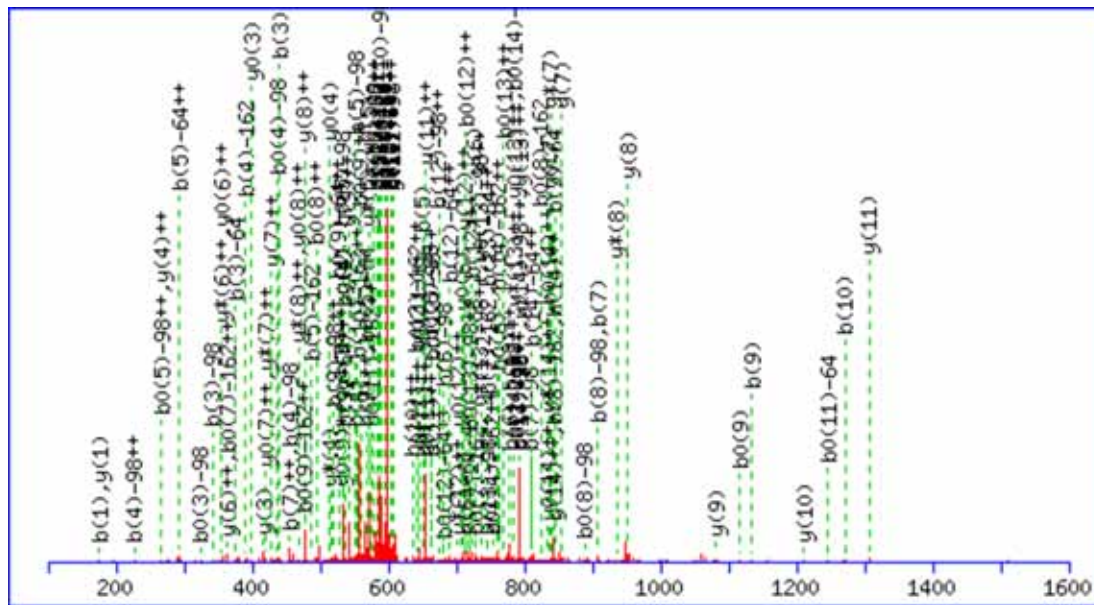

**Monoisotopic mass of neutral peptide Mr(calc):** 1858.7808

**Fixed modifications:** Carbamidomethyl (C) (apply to specified residues or termini only)

**Variable modifications:**

**N-term :** Dimethyl (N-term)

**M1 :** Oxidation (M), with neutral losses 0.0000(shown in table), 63.9983

**S3 :** Phospho (ST), with neutral losses 0.0000(shown in table), 97.9769

**Ions Score:** 47 **Expect:** 0.00083

**Matched b ions:** b(1), b(3)-98, b(3), b(4)-98++, b(4)-98, b(4), b(5)-98, b(5), b(6), b(6)-98, b(7)++, b(7), b(7)-98, b(8)-98, b(9), b(9)-98++, b(9)++, b(10)-98++, b(10), b(10)++, b(11)++, b(12)++, b(12)-98++, b(13)++, b(14)-98++, b(14)++

**Matched y ions:** y(1), y(3), y(4)++, y(4), y(5), y(6)++, y(6), y(7)++, y(7), y(8), y(8)++, y(9), y(9)++, y(10), y(10)++, y(11), y(11)++, y(12)++, y(13)++, y(13)-98++, y(14)-98++, y(14)++

**Precursor origin neutral loss:** +

## Peptide No.593

**MPSIPEEPEHGDLER**

**Confirmed sites:** @S:3

**Ambiguous sites:**

**MS/MS Fragmentation of MPSIPEEPEHGDLER**

Found in **SPEG\_MOUSE**, Striated muscle-specific serine/threonine-protein kinase OS=Mus musculus  
GN=Speg PE=1 SV=2

Match to Query 3287: 1842.788442 from(615.270090,3+)

Title: Elution from: 42.492 to 42.492 scan no 3688 cid35.00 polarity:+:MA10

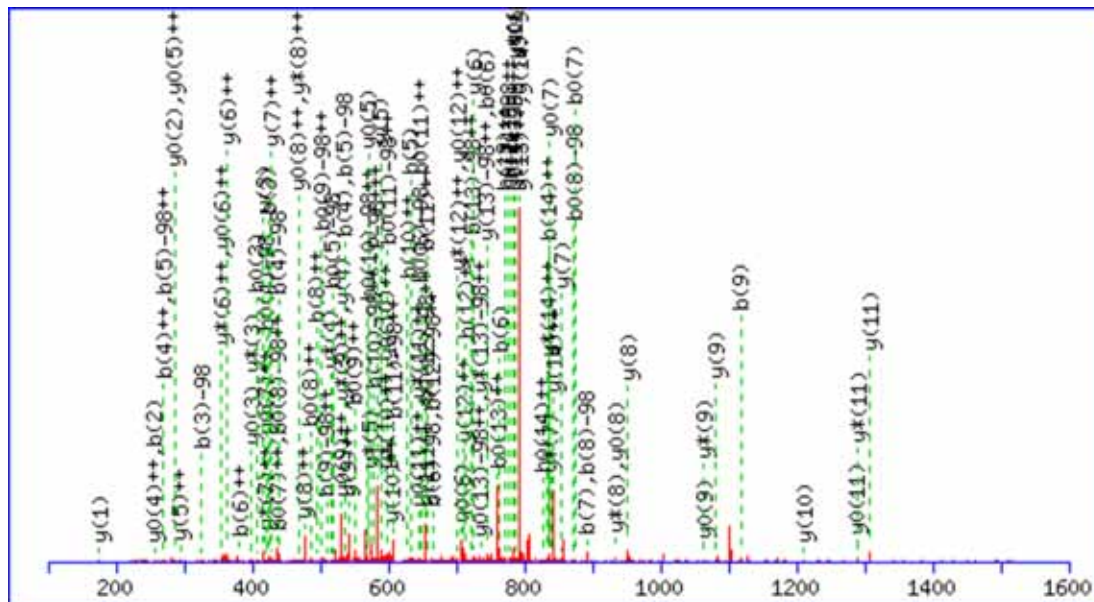

**Monoisotopic mass of neutral peptide Mr(calc):** 1842.7859

**Fixed modifications:** Carbamidomethyl (C) (apply to specified residues or termini only)

**Variable modifications:**

**N-term :** Dimethyl (N-term)

**S3 :** Phospho (ST), with neutral losses 0.0000(shown in table), 97.9769

**Ions Score:** 37 **Expect:** 0.0081

**Matched b ions:** b(2), b(3), b(3)-98, b(4)-98, b(4)++, b(4), b(5)-98++, b(5)-98, b(5), b(6), b(6)++, b(6)-98, b(7)-98, b(7), b(8)-98, b(8)++, b(9), b(9)-98++, b(10)-98++, b(10)++, b(11)-98++, b(11)++, b(12)++, b(12)-98++, b(13)-98++, b(13)++, b(14)++, b(14)-98++

**Matched y ions:** y(1), y(3), y(4), y(5), y(5)++, y(6)++, y(6), y(7)++, y(7), y(8), y(8)++, y(9)++, y(9), y(10)++, y(10), y(11), y(11)++, y(12)++, y(13)++, y(13)-98++, y(14)-98++, y(14)++

**Precursor origin neutral loss:** +

## Peptide No.594

**MPSIPEEPEHGDLER**

**Confirmed sites:** @S:3

**Ambiguous sites:**

**MS/MS Fragmentation of MPSIPEEPEHGDLER**

Found in **SPEG\_MOUSE**, Striated muscle-specific serine/threonine-protein kinase OS=Mus musculus GN=Speg PE=1 SV=2

Match to Query 3768: 1864.815165 from(622.612331,3+)

Title: Elution from: 35.992 to 35.992 scan no 2908 cid35.00 polarity:+:MA10:m1s









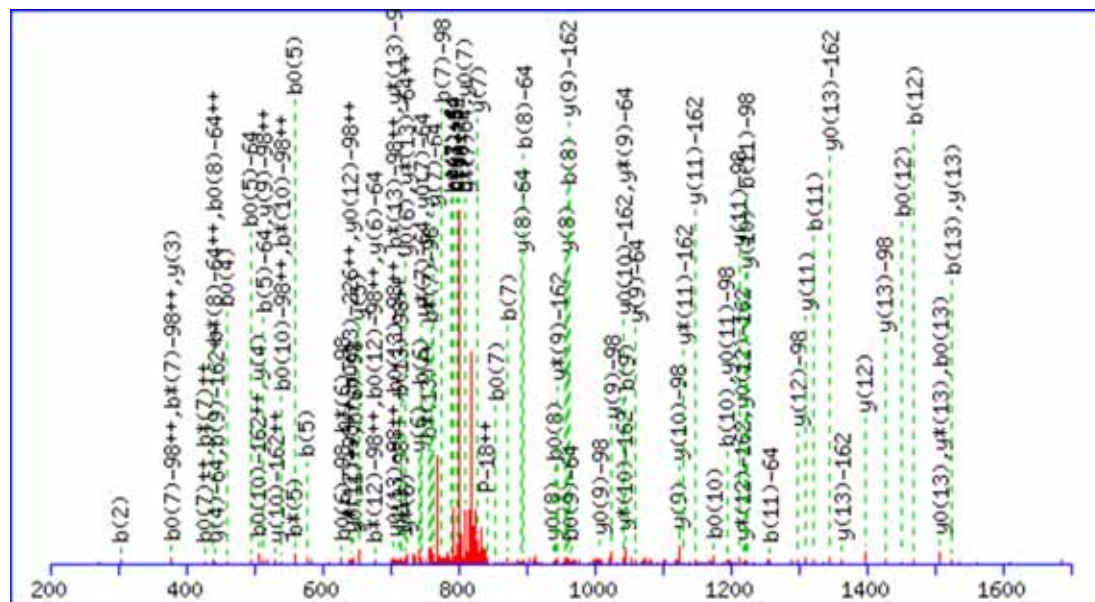

**Monoisotopic mass of neutral peptide Mr(calc):** 1699.6583

**Fixed modifications:** Carbamidomethyl (C) (apply to specified residues or termini only)

**Variable modifications:**

**N-term :** Dimethyl (N-term)

**M1 :** Oxidation (M), with neutral losses 0.0000(shown in table), 63.9983

**S6 :** Phospho (ST), with neutral losses 0.0000(shown in table), 97.9769

**M12 :** Oxidation (M), with neutral losses 0.0000(shown in table), 63.9983

**Ions Score:** 44 **Expect:** 0.00066

**Matched b ions:** b(2), b(5), b(6)-98, b(6), b(7), b(7)-98, b(8), b(9), b(10), b(11), b(11)-98, b(12), b(13), b(13)-98++

**Matched y ions:** y(3), y(4), y(5), y(6), y(7), y(8), y(9), y(9)-98, y(9)-98++, y(10)-98, y(10), y(11), y(11)-98, y(12), y(12)-98, y(13), y(13)-98, y(13)-98++

**Precursor origin neutral loss:** +

## Peptide No.598

**MQSSVSESSFQMGR**

**Confirmed sites:** @S:6,@S:8

**Ambiguous sites:**

**MS/MS Fragmentation of MQSSVSESSFQMGR**

Found in **SYNP2\_MOUSE**, Synaptopodin-2 OS=Mus musculus GN=Synpo2 PE=1 SV=2

Match to Query 3484: 1779.624888 from(890.819720,2+)

Title: Elution from: 31.152 to 31.152 scan no 2262 cid35.00 polarity:+:MA10

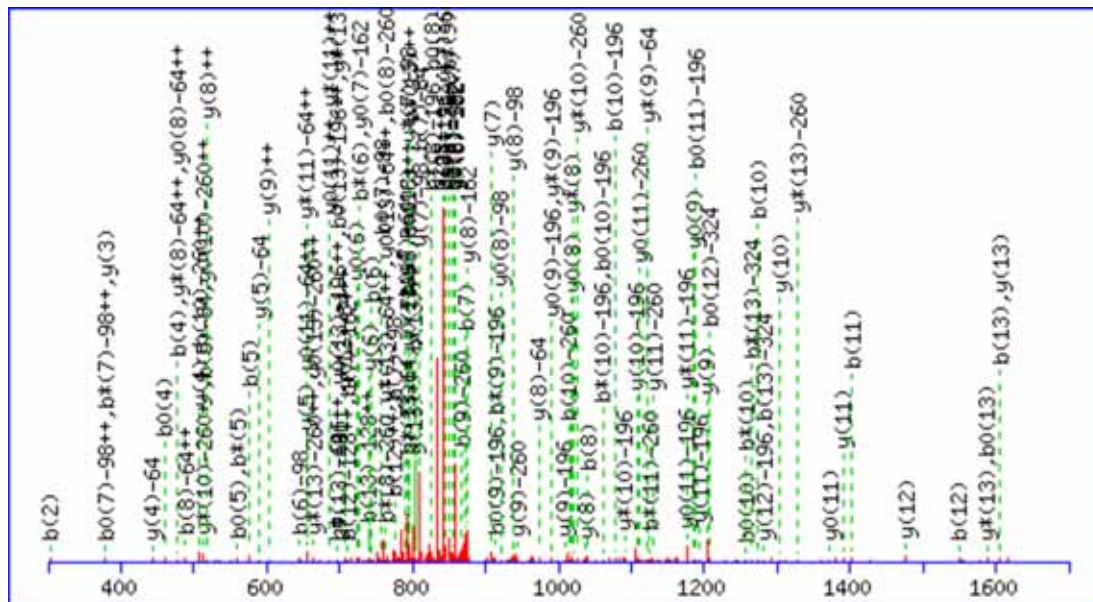

**Monoisotopic mass of neutral peptide Mr(calc):** 1779.6246

**Fixed modifications:** Carbamidomethyl (C) (apply to specified residues or termini only)

**Variable modifications:**

**N-term :** Dimethyl (N-term)

**M1 :** Oxidation (M), with neutral losses 0.0000(shown in table), 63.9983

**S6 :** Phospho (ST), with neutral losses 0.0000(shown in table), 97.9769

**S8 :** Phospho (ST), with neutral losses 0.0000(shown in table), 97.9769

**M12 :** Oxidation (M), with neutral losses 0.0000(shown in table), 63.9983

**Ions Score:** 42 **Expect:** 0.00059

**Matched b ions:** b(2), b(4), b(5), b(6)-98, b(6), b(7), b(7)-98, b(8)-98, b(8), b(8)-196, b(10)-98, b(10)-196, b(10), b(11), b(11)-98, b(12), b(12)++, b(13), b(13)-98++, b(13)++

**Matched y ions:** y(3), y(4), y(5), y(6), y(7), y(7)-98, y(8)-98, y(8), y(8)++, y(9), y(9)-98, y(9)++, y(9)-196, y(10)-196, y(10), y(10)-98, y(10)-98++, y(11), y(11)-98, y(11)-98++, y(11)-196, y(12), y(12)-98, y(12)-196, y(13), y(13)-98++, y(13)++

**Precursor origin neutral loss:** +

## Peptide No.599

**MQSSVSESSFQMGR**

**Confirmed sites:** @S:6,@S:9

**Ambiguous sites:**

**MS/MS Fragmentation of MQSSVSESSFQMGR**

Found in **SYNP2\_MOUSE**, Synaptopodin-2 OS=Mus musculus GN=Synpo2 PE=1 SV=2

Match to Query 3169: 1779.625794 from(890.820173,2+)

Title: Elution from: 31.254 to 31.254 scan no 2274 cid35.00 polarity:+:MA10



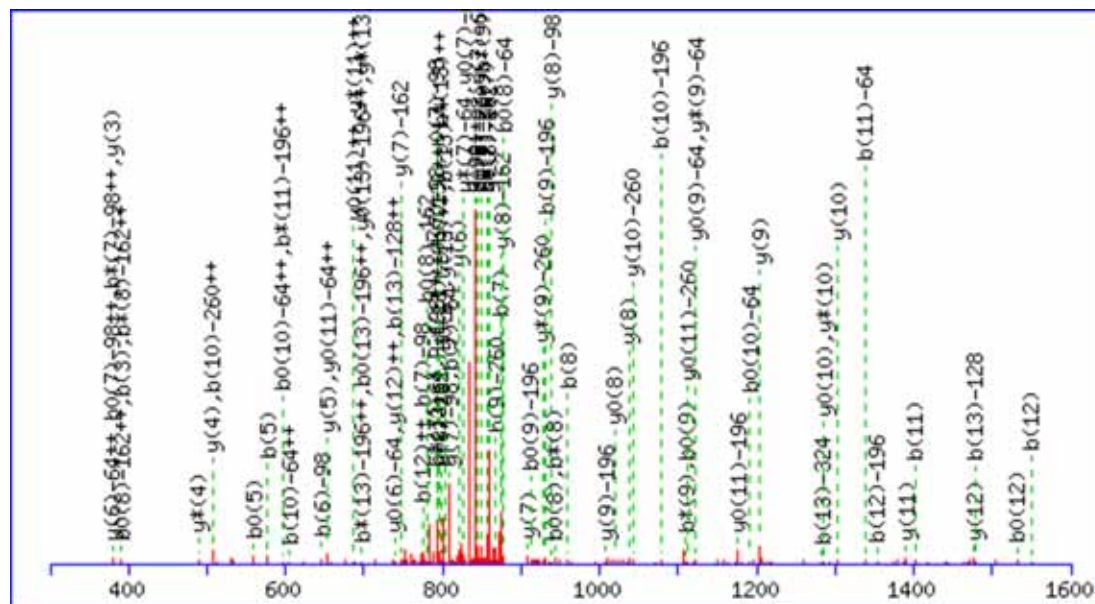

**Monoisotopic mass of neutral peptide Mr(calc):** 1779.6246

**Fixed modifications:** Carbamidomethyl (C) (apply to specified residues or termini only)

**Variable modifications:**

**N-term :** Dimethyl (N-term)

**M1 :** Oxidation (M), with neutral losses 0.0000(shown in table), 63.9983

**S6 :** Phospho (ST), with neutral losses 0.0000(shown in table), 97.9769

**S9 :** Phospho (ST), with neutral losses 0.0000(shown in table), 97.9769

**M12 :** Oxidation (M), with neutral losses 0.0000(shown in table), 63.9983

**Ions Score:** 49 **Expect:** 0.00011

**Matched b ions:** b(3), b(5), b(6)-98, b(7)-98, b(7), b(8), b(9)-196, b(9)-98, b(10)-98, b(10)-196, b(11), b(12)++, b(12), b(12)-196, b(13)-98++, b(13)++

**Matched y ions:** y(3), y(4), y(5), y(6), y(7), y(7)-98, y(8), y(8)-98, y(9)-98, y(9), y(9)-196, y(10), y(10)-98, y(11), y(11)-98++, y(11)-98, y(12), y(12)-98, y(12)++, y(13)-98++, y(13)++

**Precursor origin neutral loss:** +

## Peptide No.600

**MQSSVSESSFQMGR**

**Confirmed sites:** @S:8,@S:9

**Ambiguous sites:**

**MS/MS Fragmentation of MQSSVSESSFQMGR**

Found in **SYNP2\_MOUSE**, Synaptopodin-2 OS=Mus musculus GN=Synpo2 PE=1 SV=2

Match to Query 3583: 1779.624724 from(890.819638,2+)

Title: Elution from: 31.305 to 31.305 scan no 2317 cid35.00 polarity:+:MA10

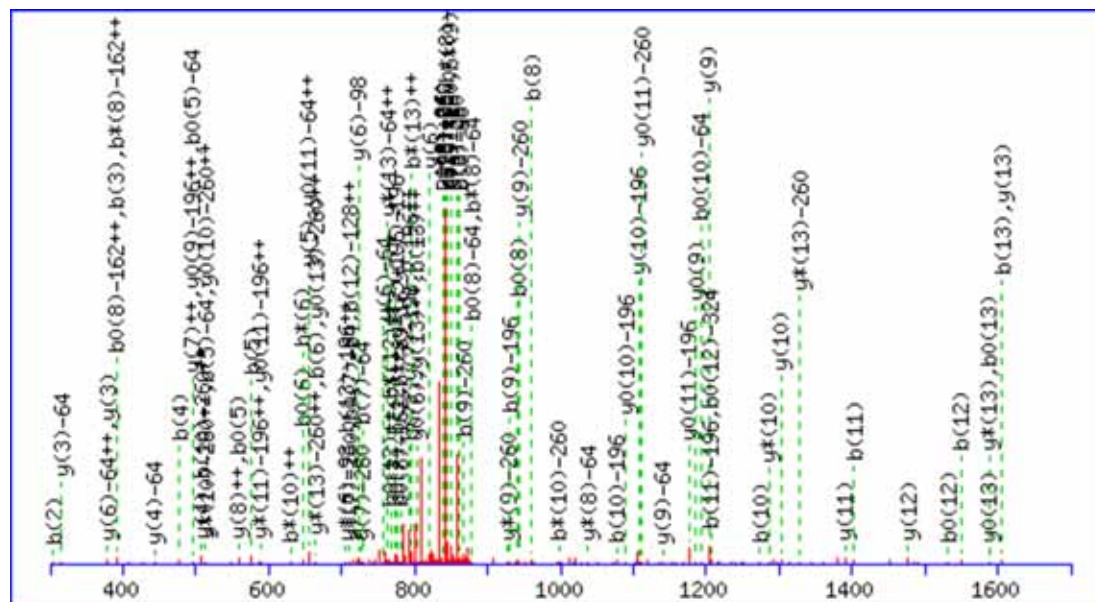

**Monoisotopic mass of neutral peptide Mr(calc): 1779.6246**

**Fixed modifications:** Carbamidomethyl (C) (apply to specified residues or termini only)

**Variable modifications:**

**N-term :** Dimethyl (N-term)

**M1 :** Oxidation (M), with neutral losses 0.0000(shown in table), 63.9983

**S8 :** Phospho (ST), with neutral losses 0.0000(shown in table), 97.9769

**S9 :** Phospho (ST), with neutral losses 0.0000(shown in table), 97.9769

**M12 :** Oxidation (M), with neutral losses 0.0000(shown in table), 63.9983

**Ions Score: 59 Expect: 1.2e-005**

**Matched b ions:** b(2), b(3), b(4), b(5), b(6), b(7), b(8), b(8)-98, b(9)-196, b(9)-98, b(10)-98, b(10)-196, b(10)-98++, b(10), b(11), b(11)-196, b(11)-98, b(12), b(12)-98, b(12)++, b(13), b(13)-196++, b(13)++

**Matched y ions:** y(3), y(4), y(5), y(6)-98, y(6), y(7)++, y(7)-196, y(8)-98, y(8)++, y(9), y(9)-98, y(10)-98, y(10), y(10)-196, y(11), y(11)-98++, y(11)-98, y(12), y(12)-98, y(13), y(13)++

**Precursor origin neutral loss:** +

## Peptide No.601

**MQSSVSESSFQMGR**

**Confirmed sites: @S:9**

**Ambiguous sites:**

MS/MS Fragmentation of **MQSSVSESSFQMGR**

Found in **SYNP2\_MOUSE**, Synaptopodin-2 OS=Mus musculus GN=Synpo2 PE=1 SV=2

Match to Query 3718: 1699.658804 from(850.836678,2+)

Title: Elution from: 28.590 to 28.590 scan no 2110 cid35.00 polarity:+:MA10

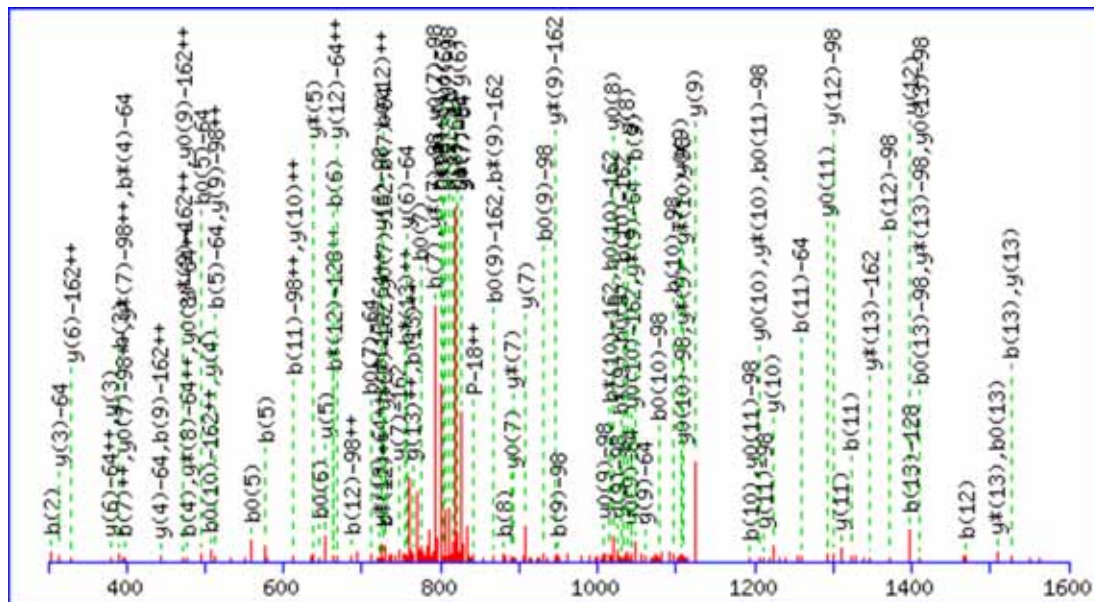

**Monoisotopic mass of neutral peptide Mr(calc):** 1699.6583

**Fixed modifications:** Carbamidomethyl (C) (apply to specified residues or termini only)

**Variable modifications:**

**N-term :** Dimethyl (N-term)

**M1 :** Oxidation (M), with neutral losses 0.0000(shown in table), 63.9983

**S9 :** Phospho (ST), with neutral losses 0.0000(shown in table), 97.9769

**M12 :** Oxidation (M), with neutral losses 0.0000(shown in table), 63.9983

**Ions Score:** 49 **Expect:** 0.00021

**Matched b ions:** b(2), b(3), b(4), b(5), b(6), b(7), b(7)++, b(8), b(9)-98, b(9), b(10), b(10)-98, b(11)-98++, b(11), b(12), b(12)-98++, b(12)-98, b(13), b(13)++

**Matched y ions:** y(3), y(4), y(5), y(6)-98, y(6), y(7), y(7)-98, y(8), y(9), y(9)-98, y(9)-98++, y(10), y(10)++, y(11), y(11)-98, y(12), y(12)-98, y(13), y(13)++

**Precursor origin neutral loss:** +

## Peptide No.602

**MQSSVSESSFQMGR**

**Confirmed sites:** @S:6,@S:8

**Ambiguous sites:**

**MS/MS Fragmentation of MQSSVSESSFQMGR**

Found in **SYNP2\_MOUSE**, Synaptopodin-2 OS=Mus musculus GN=Synpo2 PE=1 SV=2

Match to Query 4087: 1763.629254 from(882.821903,2+)

Title: Elution from: 36.036 to 36.036 scan no 3130 cid35.00 polarity:+:MA10

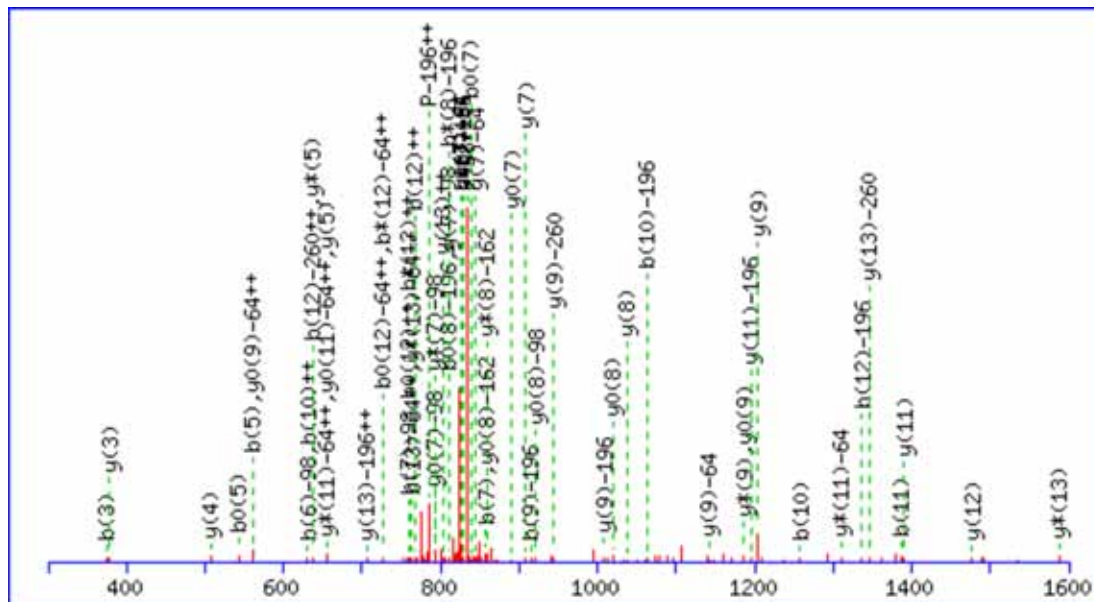

**Monoisotopic mass of neutral peptide Mr(calc):** 1763.6297

**Fixed modifications:** Carbamidomethyl (C) (apply to specified residues or termini only)

**Variable modifications:**

**N-term :** Dimethyl (N-term)

**S6 :** Phospho (ST), with neutral losses 0.0000(shown in table), 97.9769

**S8 :** Phospho (ST), with neutral losses 0.0000(shown in table), 97.9769

**M12 :** Oxidation (M), with neutral losses 0.0000(shown in table), 63.9983

**Ions Score:** 28 **Expect:** 0.017

**Matched b ions:** b(3), b(5), b(6)-98, b(7)-98, b(7), b(8)-196, b(9)-98++, b(9)-196, b(9)-98, b(10)++, b(10)-98, b(10), b(10)-196, b(11), b(12)-196, b(12)++, b(13)-98

**Matched y ions:** y(3), y(4), y(5), y(7), y(7)-98, y(8), y(9)-98, y(9), y(9)-196, y(11)-98, y(11), y(11)-196, y(12)-98, y(12), y(13)-196++, y(13)++

**Precursor origin neutral loss:** +

## Peptide No.603

**MQSSVSESSFQMGR**

**Confirmed sites:** @S:4,@S:9

**Ambiguous sites:**

MS/MS Fragmentation of **MQSSVSESSFQMGR**

Found in **SYNP2\_MOUSE**, Synaptopodin-2 OS=Mus musculus GN=Synpo2 PE=1 SV=2

Match to Query 3280: 1785.657279 from(596.226369,3+)

Title: Elution from: 31.386 to 31.386 scan no 2296 cid35.00 polarity:+:MA10:m1s





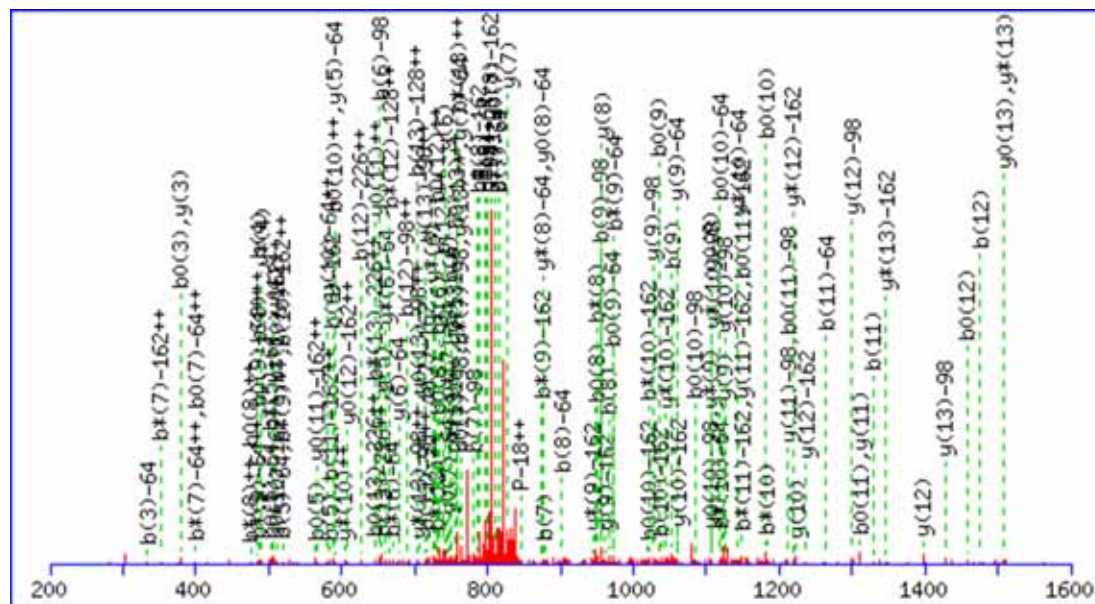

**Monoisotopic mass of neutral peptide Mr(calc): 1705.6901**

**Fixed modifications:** Carbamidomethyl (C) (apply to specified residues or termini only)

**Variable modifications:**

**N-term :** Dimethyl:2H(4)13C(2) (N-term)

**M1 :** Oxidation (M), with neutral losses 0.0000(shown in table), 63.9983

**S6 :** Phospho (ST), with neutral losses 0.0000(shown in table), 97.9769

**M12 :** Oxidation (M), with neutral losses 0.0000(shown in table), 63.9983

**Ions Score: 43 Expect: 0.001**

**Matched b ions:** b(4), b(5), b(6)-98, b(6), b(7)-98, b(7), b(8), b(8)++, b(9), b(9)-98, b(11), b(12), b(12)-98++, b(12)++, b(13)-98++

**Matched y ions:** y(3), y(4), y(5), y(6), y(7), y(8), y(9), y(9)-98, y(10), y(10)-98, y(11), y(11)-98, y(12), y(12)-98, y(13)-98, y(13)++, y(13)-98++

**Precursor origin neutral loss: +**

## Peptide No.605

**MQSSVSESSFQMGR**

**Confirmed sites: @S:6,@S:8**

**Ambiguous sites:**

**MS/MS Fragmentation of MQSSVSESSFQMGR**

Found in **SYNP2\_MOUSE**, Synaptopodin-2 OS=Mus musculus GN=Synpo2 PE=1 SV=2

Match to Query 3284: 1785.657024 from(893.835788,2+)

Title: Elution from: 31.232 to 31.232 scan no 2278 cid35.00 polarity:+:MA10

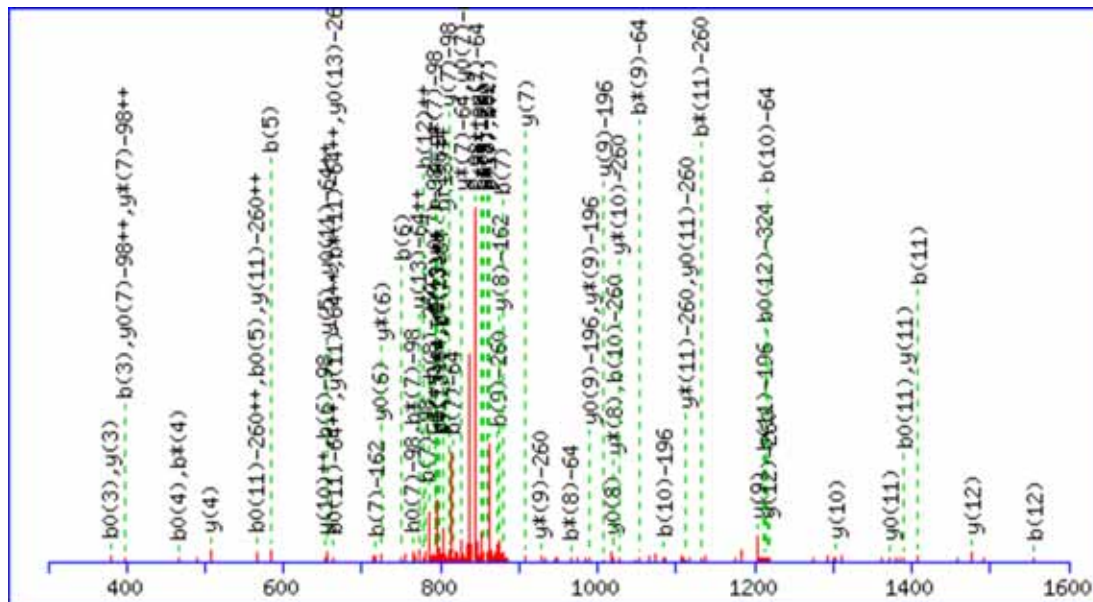

**Monoisotopic mass of neutral peptide Mr(calc):** 1785.6564

**Fixed modifications:** Carbamidomethyl (C) (apply to specified residues or termini only)

**Variable modifications:**

**N-term :** Dimethyl:2H(4)13C(2) (N-term)

**M1 :** Oxidation (M), with neutral losses 0.0000(shown in table), 63.9983

**S6 :** Phospho (ST), with neutral losses 0.0000(shown in table), 97.9769

**S8 :** Phospho (ST), with neutral losses 0.0000(shown in table), 97.9769

**M12 :** Oxidation (M), with neutral losses 0.0000(shown in table), 63.9983

**Ions Score:** 31 **Expect:** 0.0096

**Matched b ions:** b(3), b(5), b(6)-98, b(6), b(7), b(7)-98, b(8)-98, b(8)-196, b(10)-98, b(10)-196, b(11)-98, b(11), b(11)-196, b(12), b(12)-98, b(12)++

**Matched y ions:** y(3), y(4), y(5), y(7), y(7)-98, y(9)-98, y(9), y(9)-196, y(10)++, y(10)-98, y(10), y(11)-98, y(11), y(12), y(12)-98, y(13)-98++, y(13)++

**Precursor origin neutral loss:** +

## Peptide No.606

**MQSSVSESSFQMGR**

**Confirmed sites:** @S:6,@S:9

**Ambiguous sites:**

MS/MS Fragmentation of **MQSSVSESSFQMGR**

Found in **SYNP2\_MOUSE**, Synaptopodin-2 OS=Mus musculus GN=Synpo2 PE=1 SV=2

Match to Query 4845: 1785.656322 from(893.835437,2+)

Title: Elution from: 31.205 to 31.205 scan no 2389 cid35.00 polarity:+:MA10

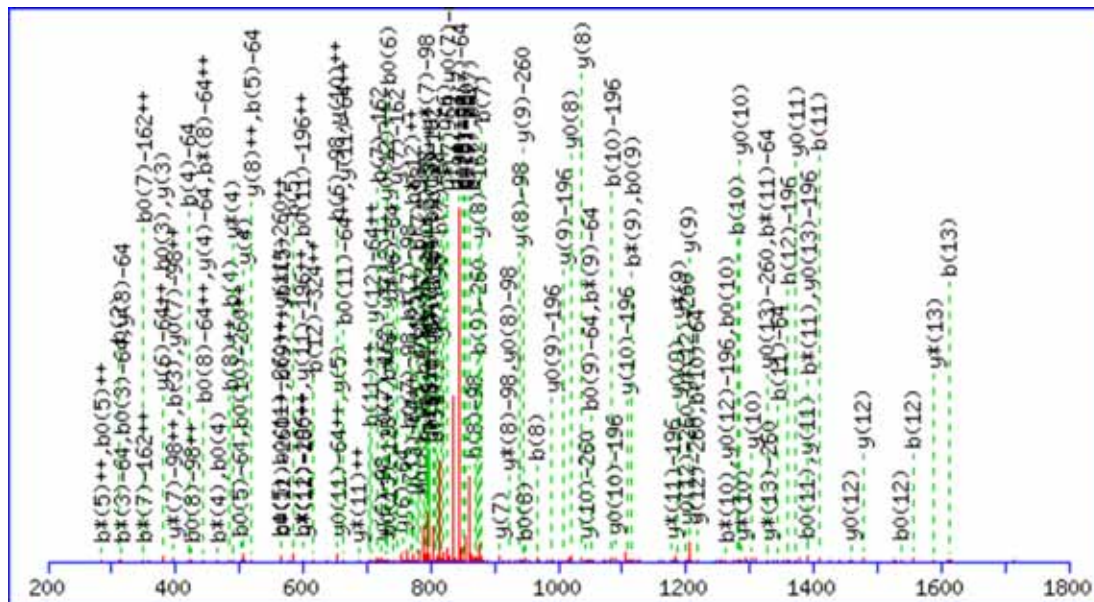

**Monoisotopic mass of neutral peptide Mr(calc):** 1785.6564

**Fixed modifications:** Carbamidomethyl (C) (apply to specified residues or termini only)

**Variable modifications:**

**N-term :** Dimethyl:2H(4)13C(2) (N-term)

**M1 :** Oxidation (M), with neutral losses 0.0000(shown in table), 63.9983

**S6 :** Phospho (ST), with neutral losses 0.0000(shown in table), 97.9769

**S9 :** Phospho (ST), with neutral losses 0.0000(shown in table), 97.9769

**M12 :** Oxidation (M), with neutral losses 0.0000(shown in table), 63.9983

**Ions Score:** 66 **Expect:** 3e-006

**Matched b ions:** b(2), b(3), b(4), b(5), b(6)-98, b(7)-98, b(7), b(8), b(8)++, b(8)-98, b(9)-98, b(9)++, b(10)-98, b(10)-196, b(10), b(11), b(11)-98, b(11)++, b(12), b(12)-98, b(12)++, b(12)-196, b(13), b(13)++

**Matched y ions:** y(3), y(4), y(5), y(6)-98, y(6), y(7), y(7)-98, y(8), y(8)++, y(8)-98, y(9)-98, y(9), y(9)-196, y(10)++, y(10)-98, y(10), y(10)-196, y(11), y(11)-98, y(11)-196++, y(12)-98, y(12), y(13)-98++, y(13)++

**Precursor origin neutral loss:** +

## Peptide No.607

**MQSSVSESSFQMGR**

**Confirmed sites:** @S:9

**Ambiguous sites:**

**MS/MS Fragmentation of MQSSVSESSFQMGR**

Found in **SYNP2\_MOUSE**, Synaptopodin-2 OS=Mus musculus GN=Synpo2 PE=1 SV=2

Match to Query 3214: 1705.691610 from(853.853081,2+)

Title: Elution from: 28.538 to 28.538 scan no 1950 cid35.00 polarity:+:MA10





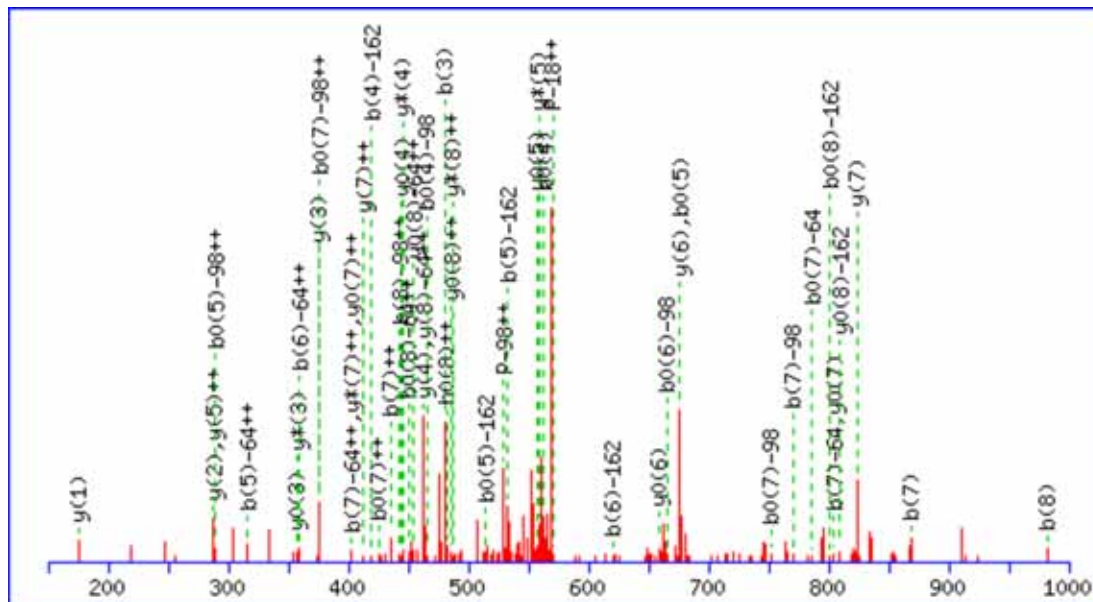

**Monoisotopic mass of neutral peptide Mr(calc):** 1154.5540

**Fixed modifications:** Carbamidomethyl (C) (apply to specified residues or termini only)

**Variable modifications:**

**N-term :** Dimethyl:2H(4)13C(2) (N-term)

**S2 :** Phospho (ST), with neutral losses 0.0000(shown in table), 97.9769

**M3 :** Oxidation (M), with neutral losses 0.0000(shown in table), 63.9983

**K9 :** Dimethyl (K)

**Ions Score:** 31 **Expect:** 0.025

**Matched b ions:** b(3), b(7)++, b(7), b(7)-98, b(8), b(8)-98++

**Matched y ions:** y(1), y(2), y(3), y(4), y(5)++, y(6), y(7), y(7)++

**Precursor origin neutral loss:** +

## Peptide No.609

**MSPAMSPARMSPAR**

**Confirmed sites:** @S:6,@S:11

**Ambiguous sites:**

**MS/MS Fragmentation of MSPAMSPARMSPAR**

Found in **TITIN\_MOUSE**, Titin OS=Mus musculus GN=Ttn PE=1 SV=1

Match to Query 3208: 1724.649993 from(575.890607,3+)

Title: Elution from: 20.067 to 20.067 scan no 953 cid35.00 polarity:+:MA10

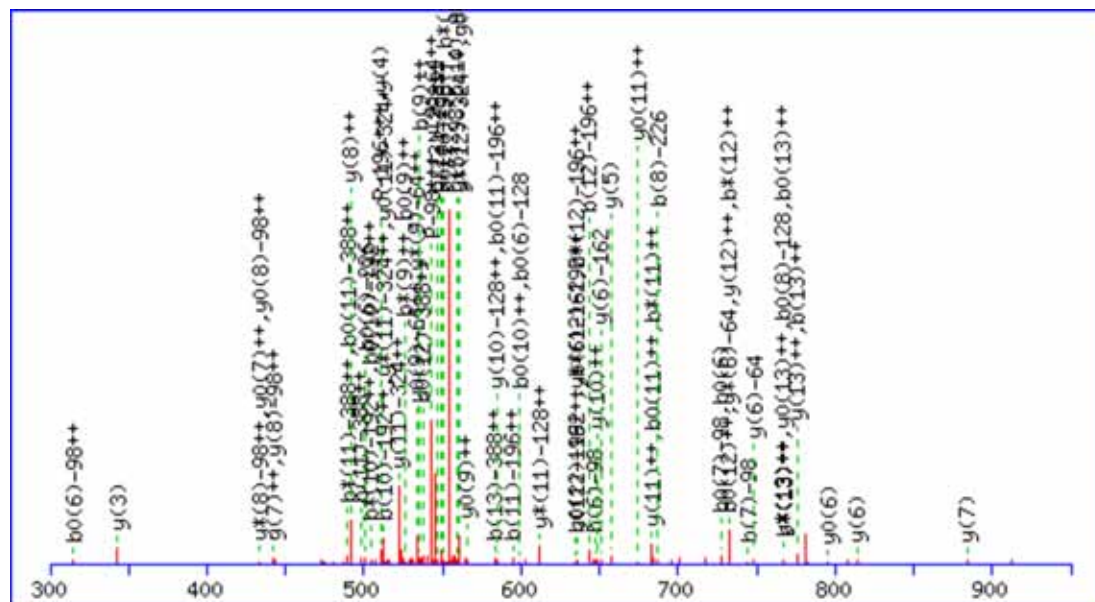

**Monoisotopic mass of neutral peptide Mr(calc):** 1724.6486

**Fixed modifications:** Carbamidomethyl (C) (apply to specified residues or termini only)

**Variable modifications:**

**N-term :** Dimethyl (N-term)

**M1 :** Oxidation (M), with neutral losses 0.0000(shown in table), 63.9983

**M5 :** Oxidation (M), with neutral losses 0.0000(shown in table), 63.9983

**S6 :** Phospho (ST), with neutral losses 0.0000(shown in table), 97.9769

**M10 :** Oxidation (M), with neutral losses 0.0000(shown in table), 63.9983

**S11 :** Phospho (ST), with neutral losses 0.0000(shown in table), 97.9769

**Ions Score:** 26 **Expect:** 0.036

**Matched b ions:** b(6)-98, b(7)-98, b(9)++, b(10)-98++, b(11)-98++, b(11)-196++, b(12)-196++, b(13)++, b(13)-98++

**Matched y ions:** y(3), y(4), y(5), y(5)-98, y(6), y(7), y(7)++, y(8)++, y(8)-98++, y(9)-98++, y(10)++, y(10)-196++, y(10)-98++, y(11)++, y(11)-98++, y(12)-98++, y(12)++, y(12)-196++, y(13)++, y(13)-98++

**Precursor origin neutral loss:** +

## Peptide No.610

**MSPAMSPARMSPAR**

**Confirmed sites:** @S:6,@S:11

**Ambiguous sites:**

**MS/MS Fragmentation of MSPAMSPARMSPAR**

Found in **TITIN\_MOUSE**, Titin OS=Mus musculus GN=Ttn PE=1 SV=1

Match to Query 3770: 1708.655472 from(570.559100,3+)

Title: Elution from: 22.774 to 22.774 scan no 1334 cid35.00 polarity:+:MA10:m1s

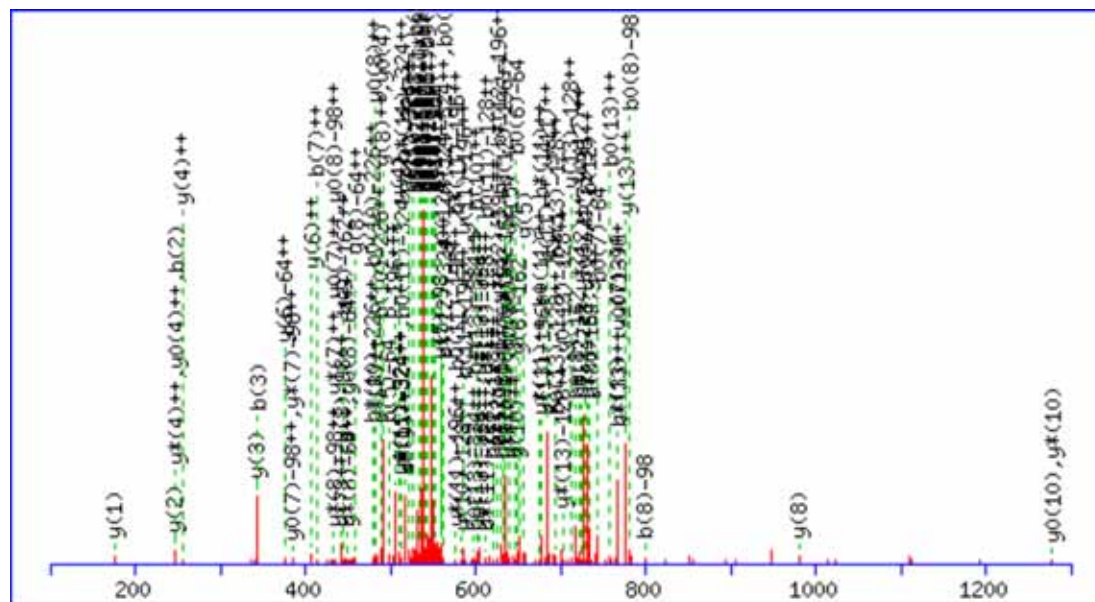

**Monoisotopic mass of neutral peptide Mr(calc): 1708.6537**

**Fixed modifications:** Carbamidomethyl (C) (apply to specified residues or termini only)

**Variable modifications:**

**N-term :** Dimethyl (N-term)

**M5 :** Oxidation (M), with neutral losses 0.0000(shown in table), 63.9983

**S6 :** Phospho (ST), with neutral losses 0.0000(shown in table), 97.9769

**M10 :** Oxidation (M), with neutral losses 0.0000(shown in table), 63.9983

**S11 :** Phospho (ST), with neutral losses 0.0000(shown in table), 97.9769

**Ions Score: 30 Expect: 0.017**

**Matched b ions:** b(2), b(3), b(5), b(6)-98, b(6), b(7)++, b(7)-98, b(8)-98, b(9)++, b(10)-98++, b(10)++, b(11)-98++, b(11)++, b(11)-196++, b(12)-196++, b(12)-98++, b(12)++, b(13)++, b(13)-98++

**Matched y ions:** y(1), y(2), y(3), y(4)++, y(4), y(5), y(5)-98, y(6)++, y(7)++, y(8)-98++, y(8), y(8)++, y(9)-98++, y(10)++, y(10)-196++, y(10)-98++, y(11)-98++, y(11)++, y(11)-196++, y(12)-98++, y(12)++, y(12)-196++, y(13)-98++, y(13)++, y(13)-196++

**Precursor origin neutral loss: +**

## Peptide No.611

**MSPARMSPAR**

**Confirmed sites: @S:2,@S:7**

**Ambiguous sites:**

**MS/MS Fragmentation of MSPARMSPAR**

Found in **TITIN\_MOUSE**, Titin OS=Mus musculus GN=Ttn PE=1 SV=1

Match to Query 1719: 1322.491790 from(662.253171,2+)

Title: Elution from: 17.093 to 17.093 scan no 769 cid35.00 polarity+:MA10



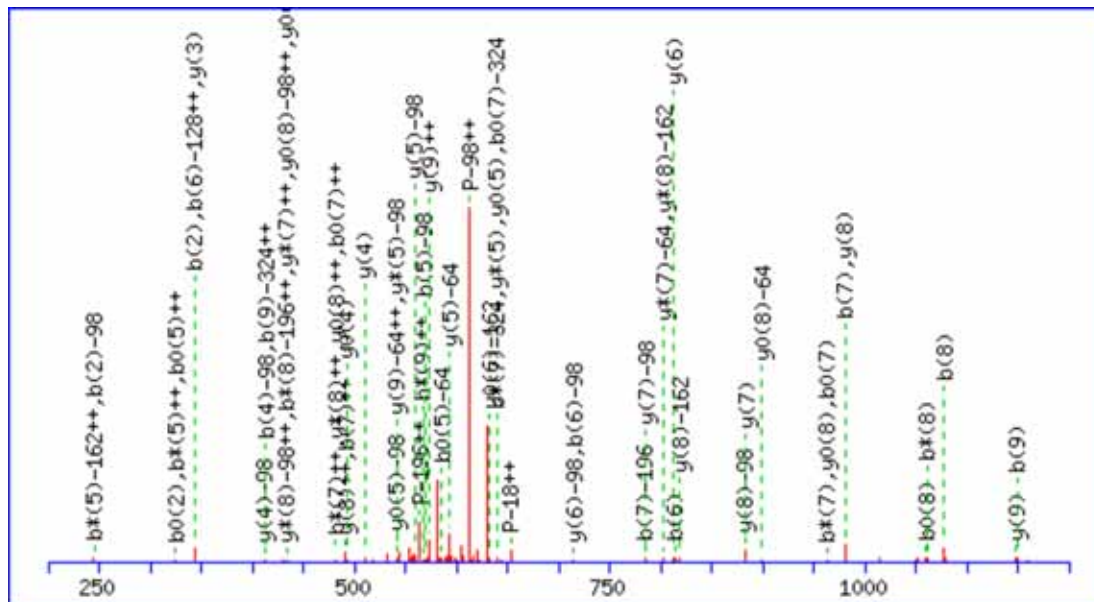

**Monoisotopic mass of neutral peptide Mr(calc):** 1322.4913

**Fixed modifications:** Carbamidomethyl (C) (apply to specified residues or termini only)

**Variable modifications:**

**N-term :** Dimethyl (N-term)

**M1 :** Oxidation (M), with neutral losses 0.0000(shown in table), 63.9983

**S2 :** Phospho (ST), with neutral losses 0.0000(shown in table), 97.9769

**M6 :** Oxidation (M), with neutral losses 0.0000(shown in table), 63.9983

**S7 :** Phospho (ST), with neutral losses 0.0000(shown in table), 97.9769

**Ions Score:** 29 **Expect:** 0.011

**Matched b ions:** b(2), b(2)-98, b(4)-98, b(5)-98, b(6), b(6)-98, b(7)-98, b(7), b(7)++, b(7)-196, b(8), b(8)-98++, b(8)-98, b(9), b(9)-98

**Matched y ions:** y(3), y(4)-98, y(4), y(5)-98, y(6)-98, y(6), y(7), y(7)-98, y(8)-98, y(8), y(8)++, y(9), y(9)-98, y(9)++

**Precursor origin neutral loss:** +

## Peptide No.612

**MSPARMSPARMSPAR**

**Confirmed sites:** @S:2,@S:7,@S:12

**Ambiguous sites:**

**MS/MS Fragmentation of MSPARMSPARMSPAR**

Found in **TITIN\_MOUSE**, Titin OS=Mus musculus GN=Ttn PE=1 SV=1

Match to Query 6232: 1944.720768 from(649.247532,3+)

Title: Elution from: 22.680 to 22.680 scan no 1246 cid35.00 polarity:+:MA10



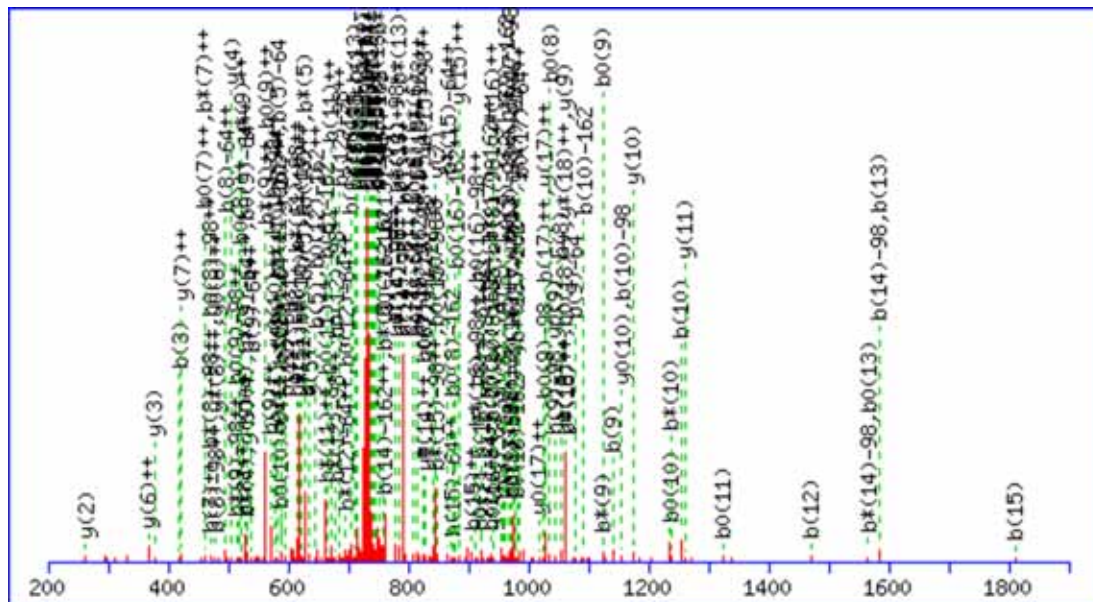

**Monoisotopic mass of neutral peptide Mr(calc):** 2314.0035

**Fixed modifications:** Carbamidomethyl (C) (apply to specified residues or termini only)

**Variable modifications:**

**N-term :** Dimethyl (N-term)

**M1 :** Oxidation (M), with neutral losses 0.0000(shown in table), 63.9983

**T6 :** Phospho (ST), with neutral losses 0.0000(shown in table), 97.9769

**Ions Score:** 50 **Expect:** 0.00056

**Matched b ions:** b(3), b(5), b(6)-98, b(6), b(7)++, b(7), b(7)-98, b(8)++, b(8)-98, b(8), b(8)-98++, b(9), b(9)++, b(9)-98, b(10), b(10)++, b(10)-98, b(10)-98++, b(11)++, b(12), b(12)++, b(12)-98++, b(13)++, b(13), b(13)-98++, b(14)-98++, b(14)-98, b(15), b(15)++, b(16)-98++, b(16)++, b(17)++, b(17)-98++

**Matched y ions:** y(2), y(3), y(4), y(5), y(6)++, y(6), y(7), y(7)++, y(8), y(9), y(9)++, y(10), y(10)++, y(11), y(13)++, y(15)++, y(17)++, y(17)-98++

**Precursor origin neutral loss:**

## Peptide No.614

**MSSDTSPAVVTTPPPPSMPHK**

**Confirmed sites:** @T:12

**Ambiguous sites:**

**MS/MS Fragmentation of MSSDTSPAVVTTPPPPSMPHK**

Found in **ADDG\_MOUSE**, Gamma-adducin OS=Mus musculus GN=Add3 PE=1 SV=1

Match to Query 6140: 2274.987312 from(759.336380,3+)

Title: Elution from: 48.224 to 48.224 scan no 4485 cid35.00 polarity:+:MA10:m1s

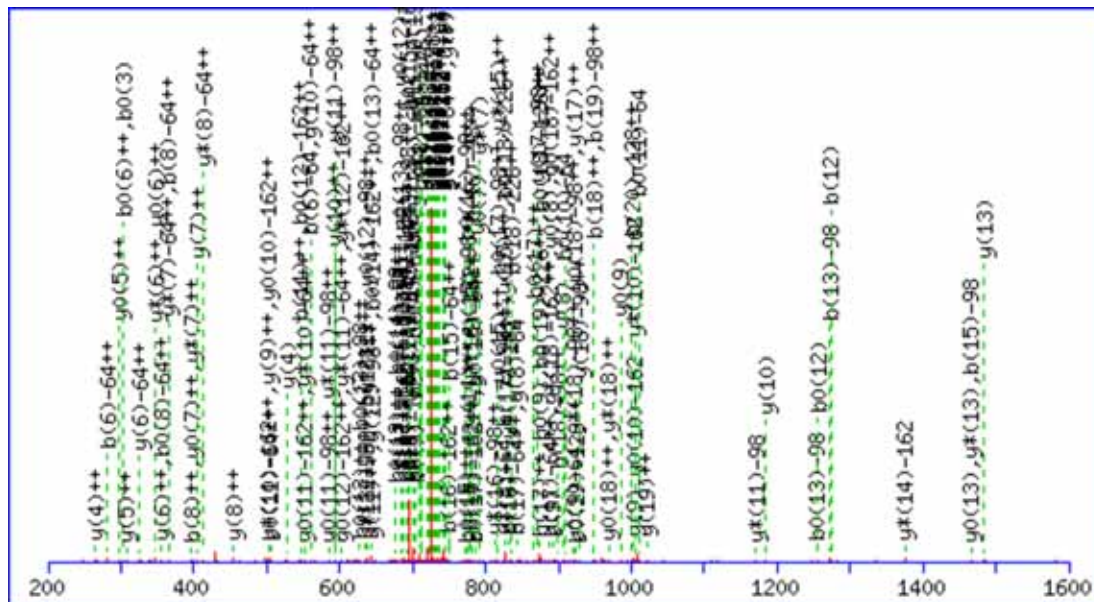

**Monoisotopic mass of neutral peptide Mr(calc):** 2274.9902

**Fixed modifications:** Carbamidomethyl (C) (apply to specified residues or termini only)

**Variable modifications:**

**M1 :** Oxidation (M), with neutral losses 0.0000(shown in table), 63.9983

**T12 :** Phospho (ST), with neutral losses 0.0000(shown in table), 97.9769

**M18 :** Oxidation (M), with neutral losses 0.0000(shown in table), 63.9983

**Ions Score:** 34 **Expect:** 0.021

**Matched b ions:** b(7), b(8)++, b(9), b(11)++, b(12)++, b(12), b(13)-98, b(13)-98++, b(13)++, b(14)-98++, b(14)++, b(15)-98, b(15)-98++, b(16)-98++, b(16)++, b(17)-98++, b(17)++, b(18)-98++, b(18)++, b(19)-98++

**Matched y ions:** y(4)++, y(4), y(5)++, y(6)++, y(6), y(7)++, y(8)++, y(8), y(9)++, y(9), y(10), y(10)++, y(11)++, y(11)-98++, y(12)-98++, y(12)++, y(13), y(13)++, y(13)-98++, y(14)++, y(14)-98++, y(15)++, y(15)-98++, y(17)++, y(17)-98++, y(18)-98++, y(19)++

**Precursor origin neutral loss:** +

## Peptide No.615

**MSYYGSSYRIVNVDSK**

**Confirmed sites:** @S:6,@S:15

**Ambiguous sites:**

MS/MS Fragmentation of **MSYYGSSYRIVNVDSK**

Found in **IRK16\_MOUSE**, Inward rectifier potassium channel 16 OS=Mus musculus GN=Kcnj16 PE=2 SV=1

Match to Query 4664: 2055.836048 from(514.966288,4+)

Title: Elution from: 33.705 to 33.705 scan no 2499 cid35.00 polarity:+:MA10



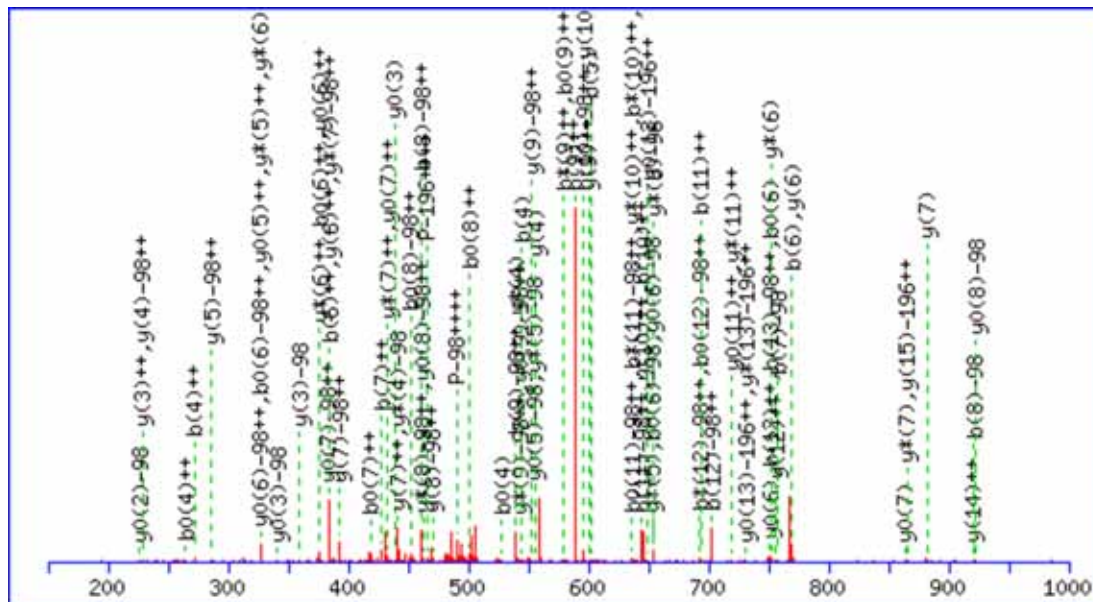

**Monoisotopic mass of neutral peptide Mr(calc):** 2055.8414

**Fixed modifications:** Carbamidomethyl (C) (apply to specified residues or termini only)

**Variable modifications:**

**S6 :** Phospho (ST), with neutral losses 0.0000(shown in table), 97.9769

**S15 :** Phospho (ST), with neutral losses 0.0000(shown in table), 97.9769

**K16 :** Dimethyl (K)

**Ions Score:** 30 **Expect:** 0.03

**Matched b ions:** b(4)++, b(4), b(5), b(6)++, b(6), b(7)++, b(7)-98, b(8)-98++, b(8)-98, b(9)++, b(9)-98++, b(10)++, b(10)-98++, b(11)-98++, b(11)++, b(12)-98++, b(12)++, b(13)-98++, b(15)-98++

**Matched y ions:** y(3)++, y(3)-98, y(4)-98++, y(4), y(5)-98++, y(6)++, y(6), y(7)++, y(7)-98++, y(7), y(8)-98++, y(9)-98++, y(9)++, y(10)++, y(10)-98++, y(11)-98++, y(12)++, y(14)++, y(15)-196++

**Precursor origin neutral loss:**

## Peptide No.616

**MVDSLQTS LDAETR**

**Confirmed sites:** @S:8

**Ambiguous sites:**

**MS/MS Fragmentation of MVDSLQTS LDAETR**

Found in **MYH7\_MOUSE**, Myosin-7 OS=Mus musculus GN=Myh7 PE=1 SV=1

Match to Query 3617: 1688.732834 from(845.373693,2+)

Title: Elution from: 39.379 to 39.379 scan no 3583 cid35.00 polarity:+MA10

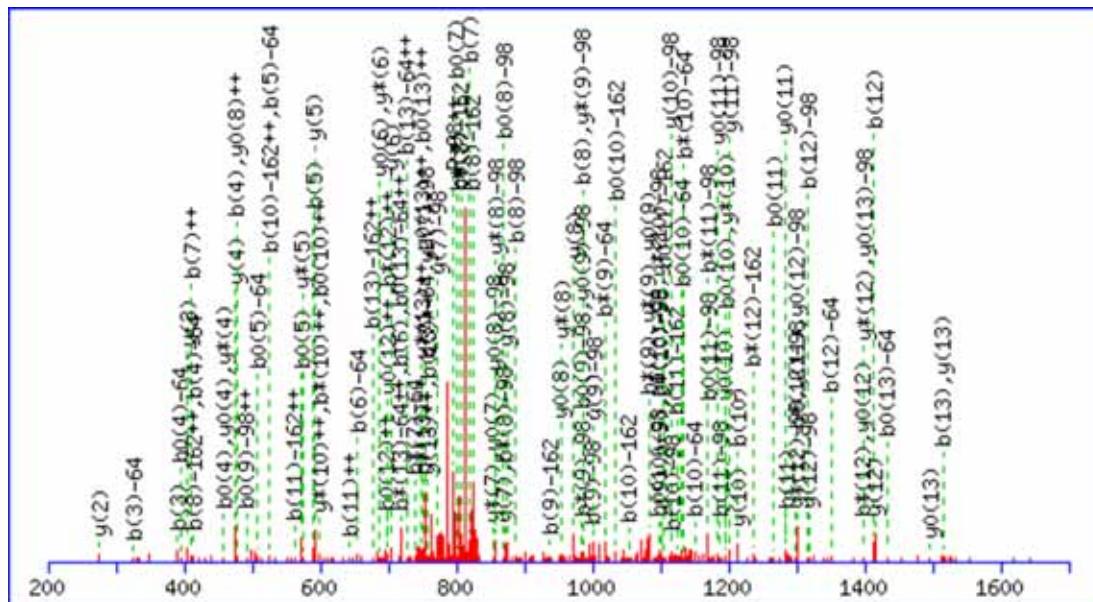

**Monoisotopic mass of neutral peptide Mr(calc):** 1688.7328

**Fixed modifications:** Carbamidomethyl (C) (apply to specified residues or termini only)

**Variable modifications:**

**N-term :** Dimethyl (N-term)

**M1 :** Oxidation (M), with neutral losses 0.0000(shown in table), 63.9983

**S8 :** Phospho (ST), with neutral losses 0.0000(shown in table), 97.9769

**Ions Score:** 52 **Expect:** 0.00024

**Matched b ions:** b(3), b(4), b(5), b(6), b(7)++, b(7), b(8), b(8)-98, b(9)-98, b(9), b(10), b(10)-98, b(11), b(11)-98, b(11)++, b(12), b(12)-98, b(13), b(13)++

**Matched y ions:** y(2), y(3), y(4), y(5), y(6), y(7)-98, y(7), y(8), y(8)-98, y(9)-98, y(9), y(10), y(10)-98, y(11), y(11)-98, y(12), y(12)-98, y(13), y(13)++

**Precursor origin neutral loss:** +

## Peptide No.617

**NALAHALQSSR**

**Confirmed sites:** @S:9

**Ambiguous sites:**

**MS/MS Fragmentation of NALAHALQSSR**

Found in **MYH6\_MOUSE**, Myosin-6 OS=Mus musculus GN=Myh6 PE=1 SV=2

Match to Query 1525: 1274.613666 from(638.314109,2+)

Title: Elution from: 30.138 to 30.138 scan no 2323 cid35.00 polarity:+:MA10

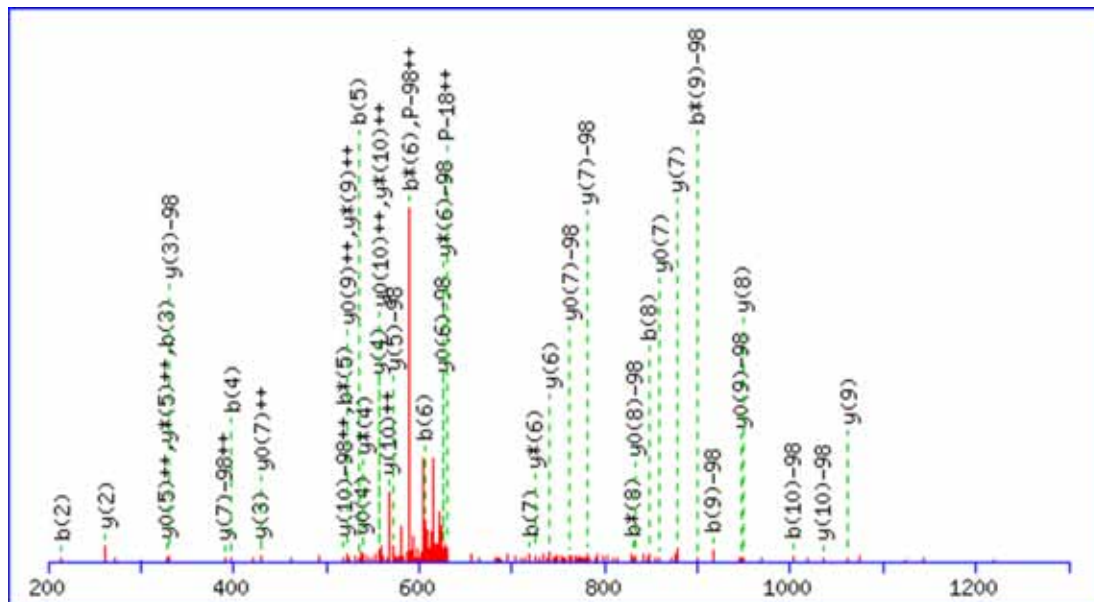

**Monoisotopic mass of neutral peptide Mr(calc):** 1274.6132

**Fixed modifications:** Carbamidomethyl (C) (apply to specified residues or termini only)

**Variable modifications:**

**N-term :** Dimethyl (N-term)

**S9 :** Phospho (ST), with neutral losses 97.9769(shown in table), 0.0000

**Ions Score:** 34 **Expect:** 0.015

**Matched b ions:** b(2), b(3), b(4), b(5), b(6), b(7), b(8), b(9)-98, b(10)-98

**Matched y ions:** y(2), y(3)-98, y(3), y(4), y(5)-98, y(6), y(7), y(7)-98++, y(7)-98, y(8), y(9), y(10)++, y(10)-98, y(10)-98++

**Precursor origin neutral loss:** +

## Peptide No.618

**NDLQLQVQSEADSLADAEER**

**Confirmed sites:** @S:13

**Ambiguous sites:**

MS/MS Fragmentation of **NDLQLQVQSEADSLADAEER**

Found in **MYH1\_MOUSE**, Myosin-1 OS=Mus musculus GN=Myh1 PE=1 SV=1

Match to Query 6204: 2338.035336 from(1170.024944,2+)

Title: Elution from: 57.008 to 57.008 scan no 5431 cid35.00 polarity:+:MA10:m1s

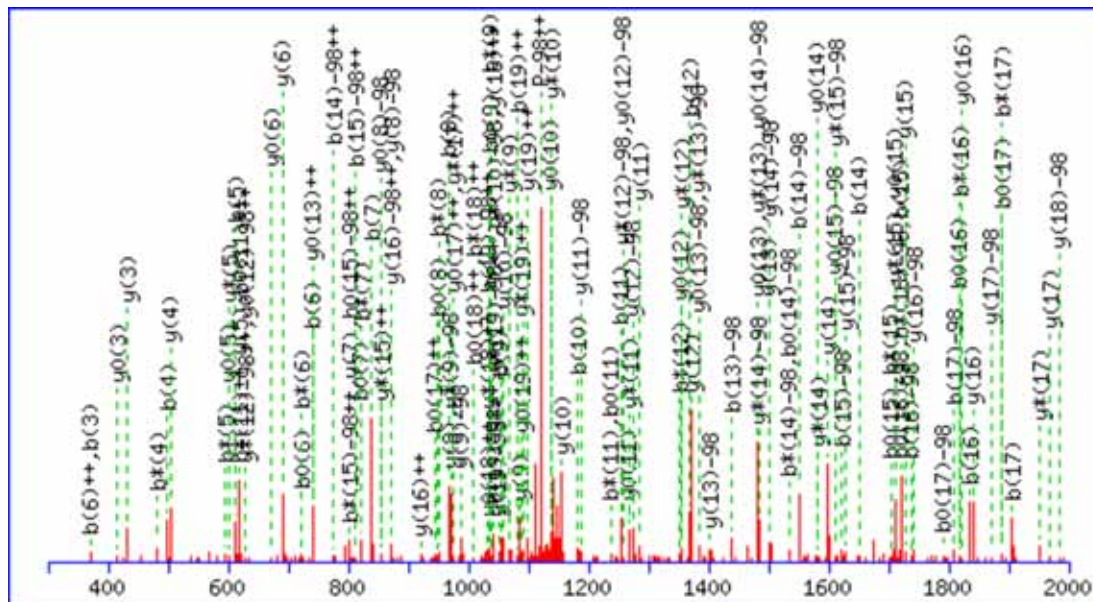

**Monoisotopic mass of neutral peptide Mr(calc):** 2338.0325

**Fixed modifications:** Carbamidomethyl (C) (apply to specified residues or termini only)

**Variable modifications:**

**N-term :** Dimethyl (N-term)

**S13 :** Phospho (ST), with neutral losses 97.9769(shown in table), 0.0000

**Ions Score:** 97 **Expect:** 1.4e-008

**Matched b ions:** b(3), b(4), b(5), b(6)++, b(6), b(7), b(8), b(9), b(10), b(11), b(12), b(13)-98, b(14)-98, b(14)-98++, b(14), b(15), b(15)-98, b(15)-98++, b(16), b(16)-98, b(17), b(17)-98, b(19)-98++, b(19)++

**Matched y ions:** y(3), y(4), y(5), y(6), y(7), y(8), y(8)-98, y(9)-98, y(9), y(10)-98, y(10), y(11), y(11)-98, y(12), y(12)-98, y(13)-98, y(13), y(14), y(14)-98, y(15)-98, y(15), y(16), y(16)-98++, y(16)++, y(16)-98, y(17), y(17)-98, y(18)++, y(18)-98, y(19)-98++, y(19)++

**Precursor origin neutral loss:** +

## Peptide No.619

**NDLQLQVQSEADSLADAEER**

**Confirmed sites:** @S:13

**Ambiguous sites:**

MS/MS Fragmentation of **NDLQLQVQSEADSLADAEER**

Found in **MYH1\_MOUSE**, Myosin-1 OS=Mus musculus GN=Myh1 PE=1 SV=1

Match to Query 7737: 2344.065370 from(1173.039961,2+)

Title: Elution from: 57.036 to 57.036 scan no 5714 cid35.00 polarity:+MA10:m1s



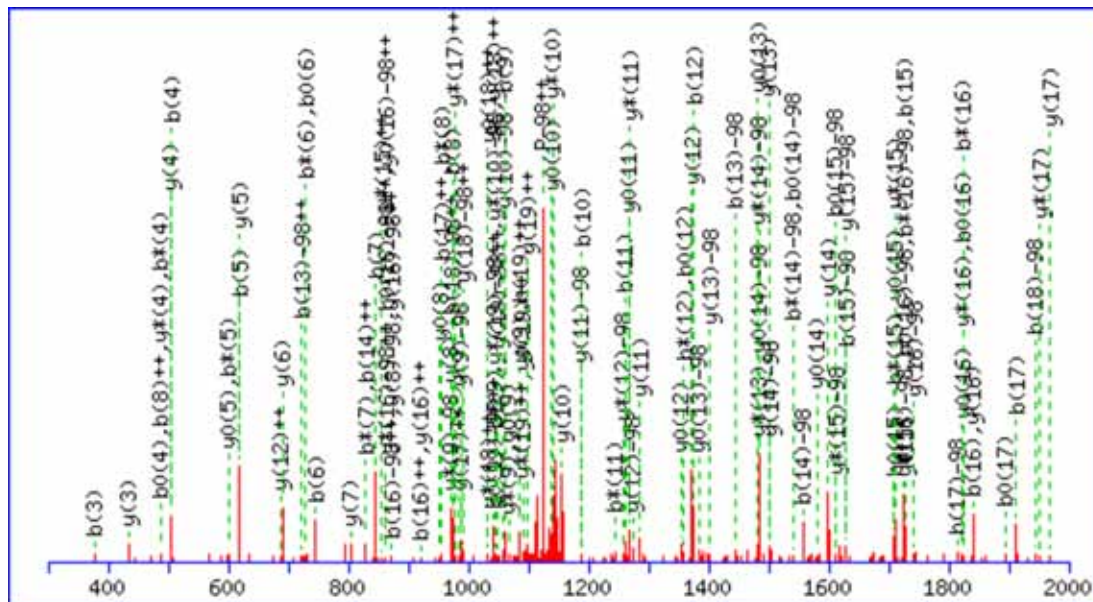

**Monoisotopic mass of neutral peptide Mr(calc):** 2344.0643

**Fixed modifications:** Carbamidomethyl (C) (apply to specified residues or termini only)

**Variable modifications:**

**N-term :** Dimethyl:2H(4)13C(2) (N-term)

**S13 :** Phospho (ST), with neutral losses 97.9769(shown in table), 0.0000

**Ions Score:** 99 **Expect:** 8.7e-009

**Matched b ions:** b(3), b(4), b(5), b(6), b(7), b(8), b(8)++, b(9), b(10), b(11), b(12), b(13)-98, b(13)-98++, b(14)-98, b(14)++, b(15), b(15)-98, b(16), b(16)-98++, b(16)++, b(17), b(17)-98, b(17)++, b(18)-98, b(18)-98++, b(19)++

**Matched y ions:** y(3), y(4), y(5), y(6), y(7), y(8), y(8)-98, y(9)-98, y(9), y(10), y(10)-98, y(11), y(11)-98, y(12), y(12)-98, y(12)++, y(13)-98, y(13), y(14), y(14)-98, y(15)-98, y(15), y(16), y(16)-98++, y(16)-98, y(16)++, y(17), y(17)++, y(18)++, y(18)-98++, y(19)-98++, y(19)++

**Precursor origin neutral loss:** +

## Peptide No.620

**NEYPLSQSPNCGITTEK**

**Confirmed sites:** @S:8

**Ambiguous sites:**

**MS/MS Fragmentation of NEYPLSQSPNCGITTEK**

Found in **TITIN\_MOUSE**, Titin OS=Mus musculus GN=Ttn PE=1 SV=1

Match to Query 6388: 2173.960790 from(1087.987671,2+)

Title: Elution from: 41.508 to 41.508 scan no 3864 cid35.00 polarity:+:MA10:m1s

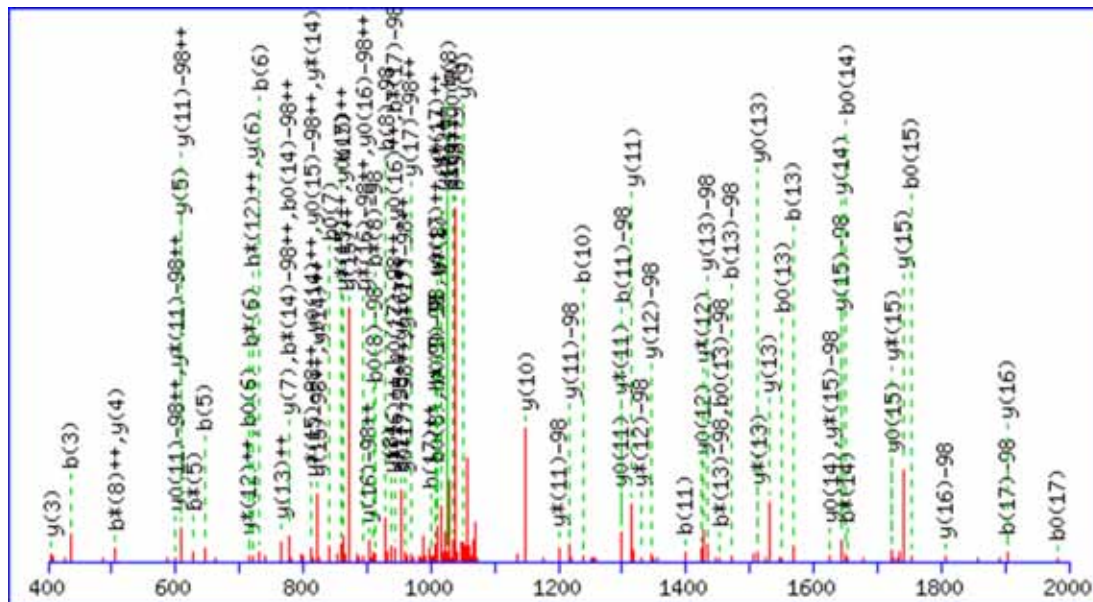

**Monoisotopic mass of neutral peptide Mr(calc):** 2173.9602

**Fixed modifications:** Carbamidomethyl (C) (apply to specified residues or termini only)

**Variable modifications:**

**N-term :** Dimethyl (N-term)

**S8 :** Phospho (ST), with neutral losses 0.0000(shown in table), 97.9769

**K18 :** Dimethyl (K)

**Ions Score:** 62 **Expect:** 3.5e-005

**Matched b ions:** b(3), b(5), b(6), b(7), b(8)-98, b(8), b(9)-98, b(10), b(11), b(11)-98, b(13), b(13)-98, b(17)-98++, b(17)-98, b(17)++

**Matched y ions:** y(3), y(4), y(5), y(6), y(7), y(8), y(9), y(10), y(11), y(11)-98, y(11)-98++, y(12)-98, y(13), y(13)++, y(13)-98, y(14)++, y(14), y(15)++, y(15)-98, y(15), y(15)-98++, y(16)++, y(16), y(16)-98, y(16)-98++, y(17)++, y(17)-98++

**Precursor origin neutral loss:** +

## Peptide No.621

**NISLSSEEEAEGLAGHPR**

**Confirmed sites:** @S:5,@S:6

**Ambiguous sites:**

MS/MS Fragmentation of **NISLSSEEEAEGLAGHPR**

Found in **PARF\_MOUSE**, Putative GTP-binding protein Parf OS=Mus musculus GN=Parf PE=1 SV=2

Match to Query 4801: 2082.868414 from(1042.441483,2+)

Title: Elution from: 47.333 to 47.333 scan no 4275 cid35.00 polarity:+:MA10

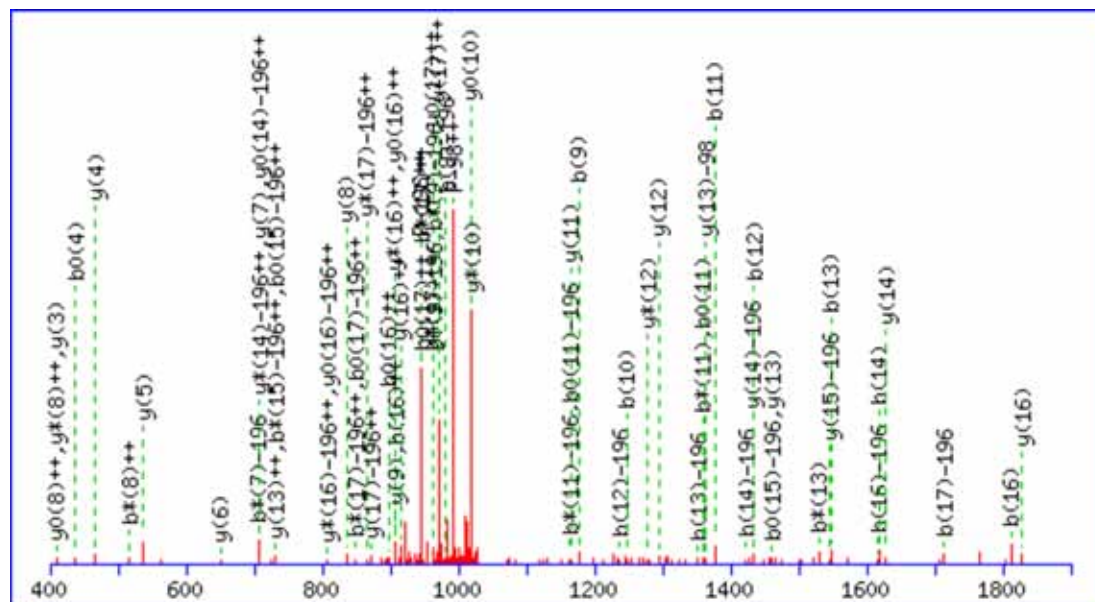

**Monoisotopic mass of neutral peptide Mr(calc):** 2082.8660

**Fixed modifications:** Carbamidomethyl (C) (apply to specified residues or termini only)

**Variable modifications:**

**N-term :** Dimethyl (N-term)

**S5 :** Phospho (ST), with neutral losses 0.0000(shown in table), 97.9769

**S6 :** Phospho (ST), with neutral losses 0.0000(shown in table), 97.9769

**Ions Score:** 60 **Expect:** 4e-005

**Matched b ions:** b(8)-98, b(9), b(9)-196, b(10), b(11), b(11)-98, b(12), b(12)-196, b(13), b(13)-196, b(13)-98, b(14), b(14)-98, b(14)-196, b(16)++, b(16), b(16)-98, b(16)-196, b(17)-98, b(17)-196, b(17)-98++

**Matched y ions:** y(3), y(4), y(5), y(6), y(7), y(8), y(9), y(11), y(12), y(13)++, y(13)-98, y(13), y(14)-196, y(14)-98, y(14), y(15)-196, y(16), y(16)-98++, y(16)++, y(17)-196++, y(17)++, y(17)-98++

**Precursor origin neutral loss:** +

## Peptide No.622

**NISLSSEEEAEGLAGHPR**

**Confirmed sites:** @S:5,@S:6

**Ambiguous sites:**

MS/MS Fragmentation of **NISLSSEEEAEGLAGHPR**

Found in **PARF\_MOUSE**, Putative GTP-binding protein Parf OS=Mus musculus GN=Parf PE=1 SV=2

Match to Query 5367: 2088.898692 from(697.306840,3+)

Title: Elution from: 47.176 to 47.176 scan no 4388 cid35.00 polarity:+:MA10:m1s

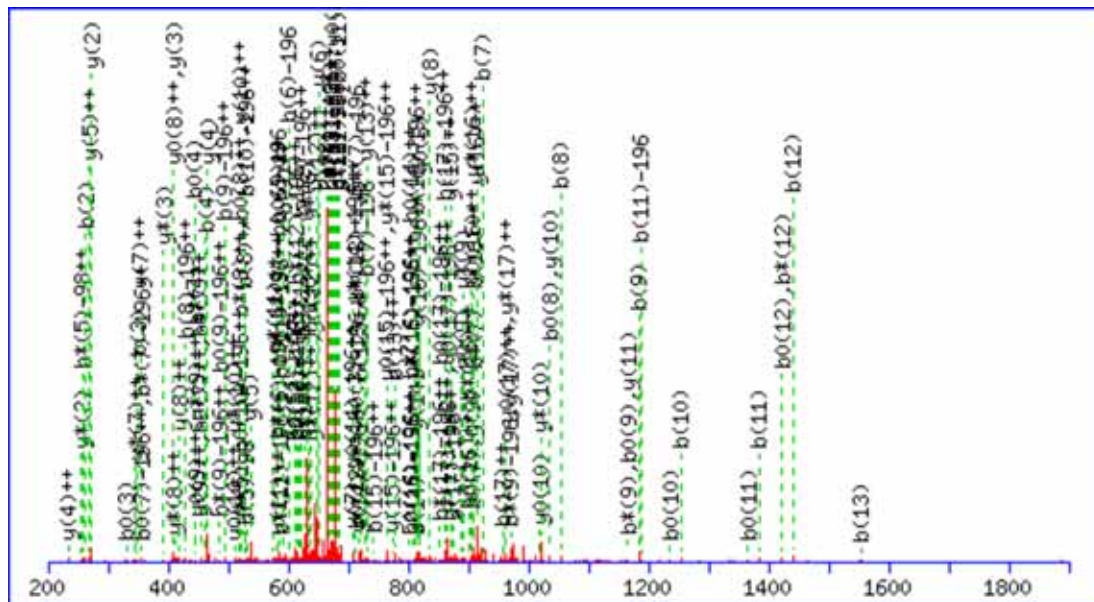

**Monoisotopic mass of neutral peptide Mr(calc):** 2088.8978

**Fixed modifications:** Carbamidomethyl (C) (apply to specified residues or termini only)

**Variable modifications:**

**N-term :** Dimethyl:2H(4)13C(2) (N-term)

**S5 :** Phospho (ST), with neutral losses 0.0000(shown in table), 97.9769

**S6 :** Phospho (ST), with neutral losses 0.0000(shown in table), 97.9769

**Ions Score:** 50 **Expect:** 0.00054

**Matched b ions:** b(2), b(3), b(4), b(5)-98, b(6)-98++, b(6)-196, b(7)-98++, b(7)-98, b(7)-196, b(7), b(8), b(8)-98++, b(8)-196++, b(8)++, b(8)-98, b(9), b(9)-98, b(9)-196++, b(9)-98++, b(9)++, b(10), b(10)++, b(10)-98, b(10)-196++, b(10)-98++, b(11), b(11)-98, b(11)-196, b(11)-98++, b(12), b(12)-98, b(12)-98++, b(12)-196++, b(12)++, b(13), b(13)++, b(13)-196++, b(13)-98++, b(14)++, b(15)-196++, b(16)++, b(16)-98++, b(16)-196++, b(17)-98++, b(17)-196++, b(17)++

**Matched y ions:** y(2), y(3), y(4), y(4)++, y(5)++, y(5), y(6), y(7)++, y(7), y(8)++, y(8), y(9)++, y(9), y(10), y(10)++, y(11), y(11)++, y(12)++, y(13)-98++, y(13)++, y(14)-98++, y(14)++, y(14)-196++, y(15)-98++, y(15)-196++, y(15)++, y(16)++, y(16)-98++, y(16)-196++, y(17)-98++, y(17)++, y(17)-196++

**Precursor origin neutral loss:** +

## Peptide No.623

**NKLEGSDVDSELEDR**

**Confirmed sites:** @S:7

**Ambiguous sites:**

MS/MS Fragmentation of **NKLEGSDVDSELEDR**

Found in **MY18A\_MOUSE**, Myosin-XVIIIa OS=Mus musculus GN=Myo18a PE=1 SV=2

Match to Query 5403: 1955.836491 from(652.952773,3+)

Title: Elution from: 38.090 to 38.090 scan no 3411 cid35.00 polarity:+:MA10



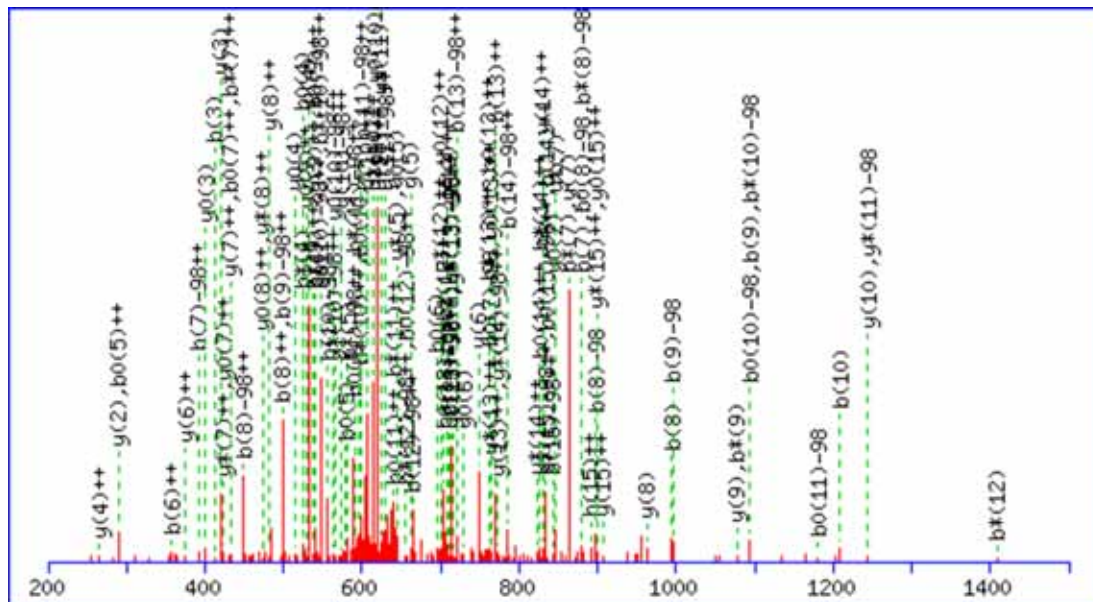

**Monoisotopic mass of neutral peptide Mr(calc):** 1955.8361

**Fixed modifications:** Carbamidomethyl (C) (apply to specified residues or termini only)

**Variable modifications:**

**N-term :** Dimethyl (N-term)

**K2 :** Dimethyl (K)

**S7 :** Phospho (ST), with neutral losses 0.0000(shown in table), 97.9769

**Ions Score:** 42 **Expect:** 0.0027

**Matched b ions:** b(3), b(4), b(6), b(6)++, b(7), b(7)-98++, b(8)-98++, b(8), b(8)++, b(8)-98, b(9), b(9)++, b(9)-98++, b(9)-98, b(10), b(10)++, b(10)-98++, b(11)-98++, b(12)++, b(12)-98++, b(13)++, b(13)-98++, b(14)++, b(14)-98++, b(15)++, b(15)-98++

**Matched y ions:** y(2), y(3), y(4)++, y(4), y(5), y(6), y(6)++, y(7), y(7)++, y(8), y(8)++, y(9), y(9)++, y(10), y(10)-98++, y(10)++, y(11)-98++, y(12)++, y(13)++, y(14)++, y(15)++

**Precursor origin neutral loss:** +

## Peptide No.624

**NKLEGSDVDSELEDR**

**Confirmed sites:** @S:7,@S:11

**Ambiguous sites:**

**MS/MS Fragmentation of NKLEGSDVDSELEDR**

Found in **MY18A\_MOUSE**, Myosin-XVIIIa OS=Mus musculus GN=Myo18a PE=1 SV=2

Match to Query 5757: 2035.803536 from(1018.909044,2+)

Title: Elution from: 39.915 to 39.915 scan no 3654 cid35.00 polarity:+:MA10:m1s

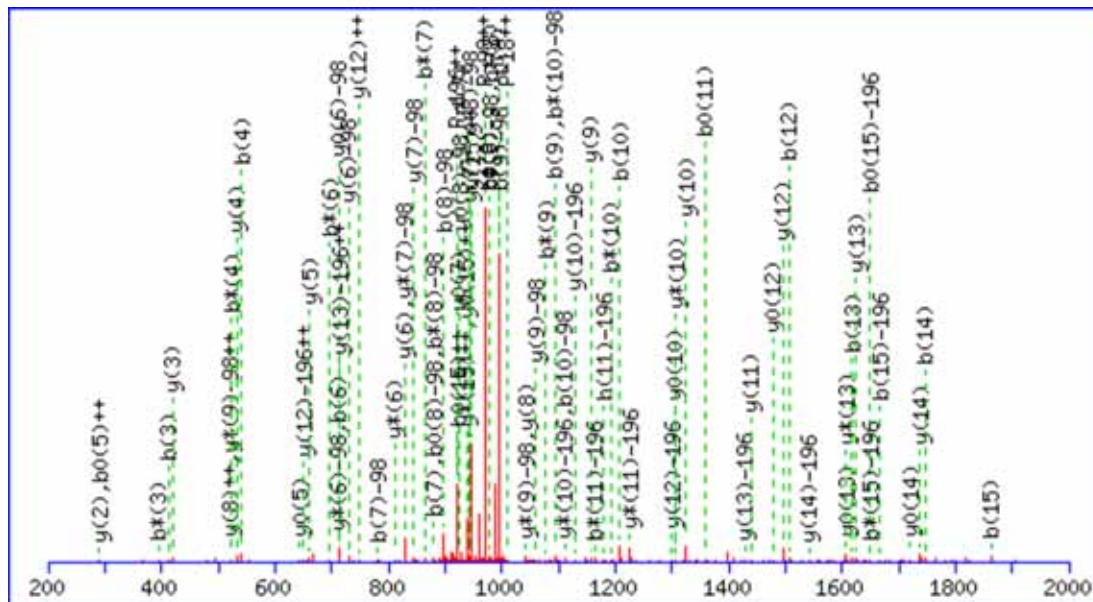

**Monoisotopic mass of neutral peptide Mr(calc):** 2035.8024

**Fixed modifications:** Carbamidomethyl (C) (apply to specified residues or termini only)

**Variable modifications:**

**N-term :** Dimethyl (N-term)

**K2 :** Dimethyl (K)

**S7 :** Phospho (ST), with neutral losses 0.0000(shown in table), 97.9769

**S11 :** Phospho (ST), with neutral losses 0.0000(shown in table), 97.9769

**Ions Score:** 64 **Expect:** 1.3e-005

**Matched b ions:** b(3), b(4), b(6), b(7)-98, b(7), b(8), b(8)-98, b(9)-98, b(9), b(10), b(10)-98, b(11)-98, b(11)-196, b(12)-98, b(12), b(13), b(14), b(14)-98, b(15), b(15)-98, b(15)-196

**Matched y ions:** y(2), y(3), y(4), y(5), y(6), y(6)-98, y(7)-98, y(7), y(8), y(8)++, y(8)-98, y(9), y(9)-98, y(10), y(10)-98, y(10)-196, y(11)-98, y(11), y(12)-98, y(12), y(12)-196, y(12)-196++, y(12)++, y(13)-196++, y(13), y(13)-196, y(13)-98, y(14), y(14)-98, y(14)-196, y(14)-98++, y(15)++, y(15)-98++

**Precursor origin neutral loss:** +

## Peptide No.625

**NKLEGDSVDSELEDRVDGVK**

**Confirmed sites:** @S:7,@S:11

**Ambiguous sites:**

MS/MS Fragmentation of **NKLEGDSVDSELEDRVDGVK**

Found in **MY18A\_MOUSE**, Myosin-XVIIIa OS=Mus musculus GN=Myo18a PE=1 SV=2

Match to Query 7773: 2562.115260 from(855.045696,3+)

Title: Elution from: 48.453 to 48.453 scan no 4725 cid35.00 polarity:+:MA10:m1s

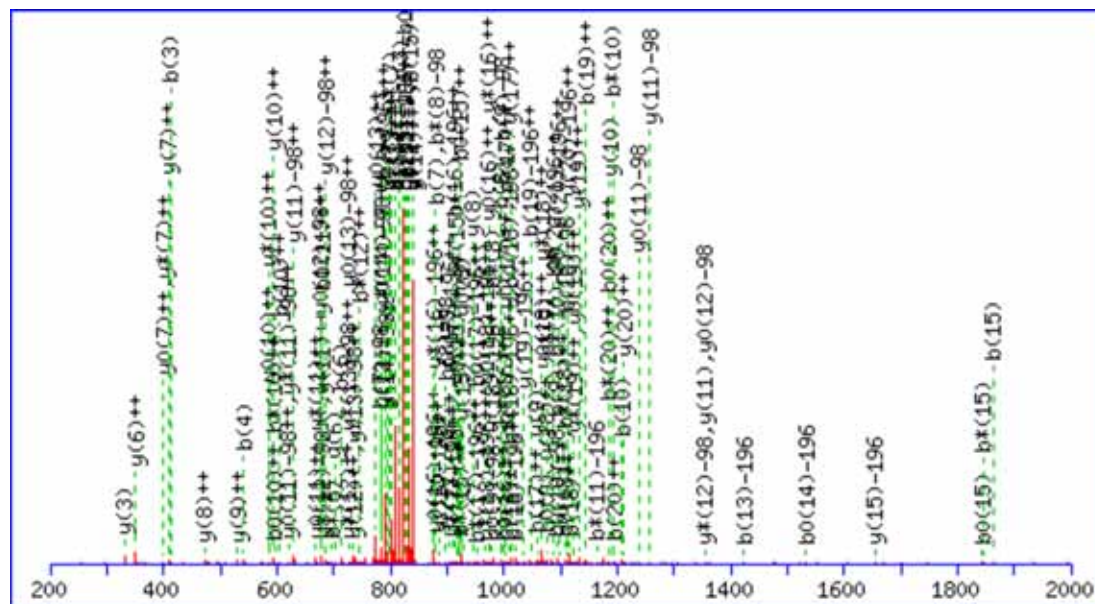

**Monoisotopic mass of neutral peptide Mr(calc):** 2562.1139

**Fixed modifications:** Carbamidomethyl (C) (apply to specified residues or termini only)

**Variable modifications:**

**N-term :** Dimethyl (N-term)

**K2 :** Dimethyl (K)

**S7 :** Phospho (ST), with neutral losses 0.0000(shown in table), 97.9769

**S11 :** Phospho (ST), with neutral losses 0.0000(shown in table), 97.9769

**K21 :** Dimethyl (K)

**Ions Score:** 34 **Expect:** 0.027

**Matched b ions:** b(3), b(4), b(6), b(7)-98, b(7), b(8), b(8)-98, b(9), b(9)-98, b(10), b(10)++, b(10)-98, b(11)-98, b(13)-196, b(13)-98, b(13)++, b(14)-98++, b(15), b(15)-196++, b(16)-196++, b(16)++, b(17)-98++, b(17)++, b(18)-98++, b(18)-196++, b(18)++, b(19)++, b(19)-196++, b(19)-98++, b(20)-98++, b(20)++, b(20)-196++

**Matched y ions:** y(3), y(6)++, y(6), y(7)++, y(7), y(8)++, y(8), y(9)++, y(9), y(10)++, y(10), y(11)-98++, y(11)++, y(11)-98, y(11), y(12)++, y(12)-98++, y(13)-98++, y(13)++, y(14)-98++, y(14)++, y(15)-98++, y(15)++, y(15)-196, y(15)-196++, y(16)-196++, y(16)-98++, y(17)++, y(17)-98++, y(17)-196++, y(18)++, y(18)-98++, y(18)-196++, y(19)++, y(19)-196++, y(19)-98++, y(20)++, y(20)-196++

**Precursor origin neutral loss:** +

## Peptide No.626

**NKLEGSDVDSELEDRVDGK**

**Confirmed sites:** @S:7,@S:11

**Ambiguous sites:**

MS/MS Fragmentation of **NKLEGSDVDSELEDRVDGK**

Found in **MY18A\_MOUSE**, Myosin-XVIIIa OS=Mus musculus GN=Myo18a PE=1 SV=2

Match to Query 8314: 2580.212664 from(646.060442,4+)

Title: Elution from: 48.333 to 48.333 scan no 4746 cid35.00 polarity:+:MA10:m1s

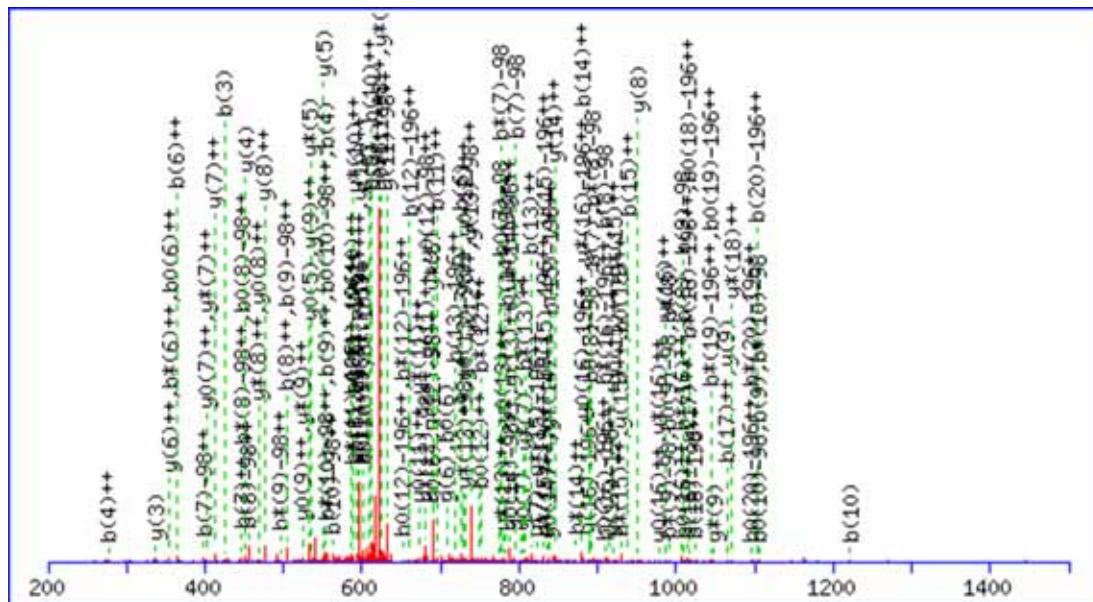

**Monoisotopic mass of neutral peptide Mr(calc):** 2580.2094

**Fixed modifications:** Carbamidomethyl (C) (apply to specified residues or termini only)

**Variable modifications:**

**N-term :** Dimethyl:2H(4)13C(2) (N-term)

**K2 :** Dimethyl:2H(4)13C(2) (K)

**S7 :** Phospho (ST), with neutral losses 0.0000(shown in table), 97.9769

**S11 :** Phospho (ST), with neutral losses 0.0000(shown in table), 97.9769

**K21 :** Dimethyl:2H(4)13C(2) (K)

**Ions Score:** 55 **Expect:** 0.00029

**Matched b ions:** b(3), b(4), b(4)++, b(5), b(6)++, b(6), b(7)-98++, b(7)++, b(7)-98, b(7), b(8)-98++, b(8), b(8)++, b(8)-98, b(9)-98++, b(9), b(9)++, b(9)-98, b(10), b(10)++, b(10)-98++, b(11)-196++, b(11)++, b(12)-98++, b(12)-196++, b(13)++, b(13)-98++, b(13)-196++, b(14)++, b(14)-98++, b(14)-196++, b(15)-196++, b(15)-98++, b(15)++, b(16)++, b(16)-98++, b(17)-98++, b(17)++, b(18)-196++, b(19)-98++, b(20)-196++

**Matched y ions:** y(3), y(4), y(5), y(6)++, y(6), y(7)++, y(7), y(8)++, y(8), y(9)++, y(9), y(10)++, y(11)-98++, y(11)++, y(12)++, y(12)-98++, y(13)-98++, y(13)++, y(14)++, y(15)-98++, y(15)++, y(15)-196++, y(16)++, y(16)-196++, y(16)-98++, y(17)++, y(17)-98++, y(17)-196++

**Precursor origin neutral loss:** +

## Peptide No.627

**NLGSINTELQDVQR**

**Confirmed sites:** @S:4

**Ambiguous sites:**

**MS/MS Fragmentation of NLGSINTELQDVQR**

Found in **SC22B\_MOUSE**, Vesicle- trafficking protein SEC22b OS=Mus musculus GN=Sec22b PE=1 SV=3

Match to Query 3145: 1693.804362 from(847.909457,2+)

Title: Elution from: 52.136 to 52.136 scan no 4991 cid35.00 polarity:+:MA10





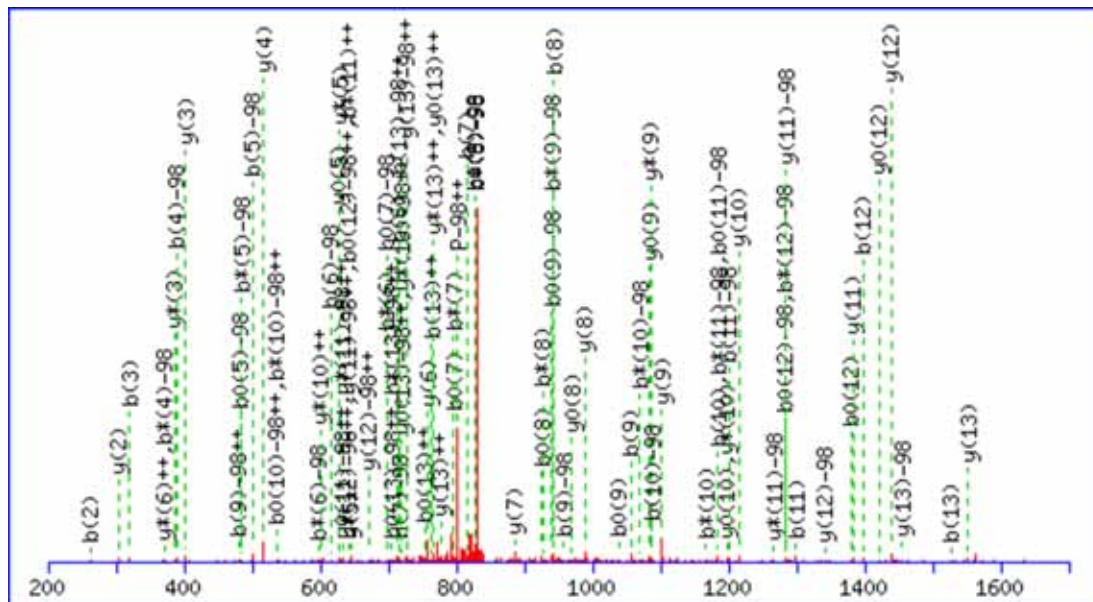

**Monoisotopic mass of neutral peptide Mr(calc):** 1699.8354

**Fixed modifications:** Carbamidomethyl (C) (apply to specified residues or termini only)

**Variable modifications:**

**N-term :** Dimethyl:2H(4)13C(2) (N-term)

**S4 :** Phospho (ST), with neutral losses 0.0000(shown in table), 97.9769

**Ions Score:** 88 **Expect:** 9e-008

**Matched b ions:** b(2), b(3), b(4)-98, b(5)-98, b(6), b(6)-98, b(7)-98, b(7), b(8), b(9), b(9)-98+, b(9)-98, b(10), b(10)-98, b(11), b(11)-98, b(12), b(13), b(13)-98+, b(13)+

**Matched y ions:** y(2), y(3), y(4), y(5), y(6), y(7), y(8), y(9), y(10), y(11)-98, y(11), y(11)-98+, y(12), y(12)-98, y(12)-98+, y(13), y(13)-98+, y(13)-98, y(13)+

**Precursor origin neutral loss:** +

## Peptide No.629

**NSAGGTSVGWDSPPASPLQR**

**Confirmed sites:** @S:12,@S:16

**Ambiguous sites:**

**MS/MS Fragmentation of NSAGGTSVGWDSPPASPLQR**

Found in **SNTA1\_MOUSE**, Alpha-1-syntrophin OS=Mus musculus GN=Snta1 PE=1 SV=1

Match to Query 5031: 2170.910288 from(1086.462420,2+)

Title: Elution from: 47.282 to 47.282 scan no 4268 cid35.00 polarity:+:MA10:m1s



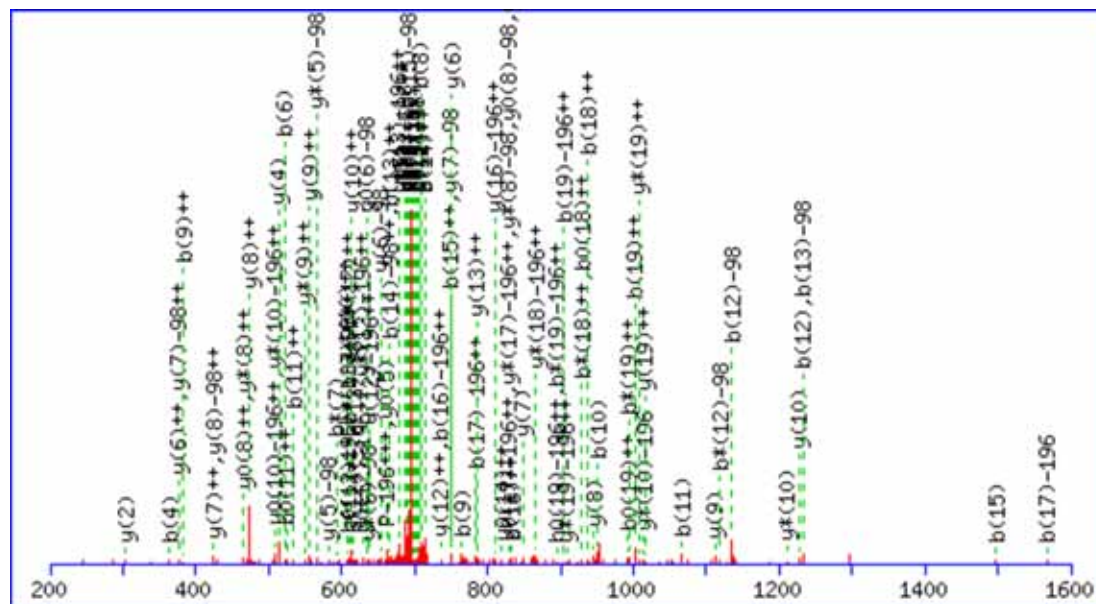

**Monoisotopic mass of neutral peptide Mr(calc):** 2176.9404

**Fixed modifications:** Carbamidomethyl (C) (apply to specified residues or termini only)

**Variable modifications:**

**N-term :** Dimethyl:2H(4)13C(2) (N-term)

**S12 :** Phospho (ST), with neutral losses 97.9769(shown in table), 0.0000

**S16 :** Phospho (ST), with neutral losses 97.9769(shown in table), 0.0000

**Ions Score:** 48 **Expect:** 0.00092

**Matched b ions:** b(4), b(6), b(7), b(8), b(9), b(9)++, b(10), b(11), b(11)++, b(12)-98, b(12), b(12)++, b(13)-98, b(13)-98++, b(13)++, b(14)++, b(14)-98++, b(15), b(15)++, b(15)-98++, b(16)-98, b(16)-98++, b(16)++, b(16)-196++, b(17)-196, b(17)-196++, b(17)-98++, b(18)-98++, b(18)++, b(19)-98++, b(19)++, b(19)-196++

**Matched y ions:** y(2), y(4), y(5), y(5)-98, y(6)++, y(6)-98, y(6), y(7)++, y(7)-98, y(7)-98++, y(7), y(8)-98++, y(8)++, y(8), y(9)++, y(9)-98++, y(9), y(9)-98, y(10)++, y(10), y(10)-98++, y(10)-98, y(11)-196++, y(11)++, y(12)-196++, y(12)-98++, y(12)++, y(13)++, y(13)-196++, y(15)-98++, y(16)-196++, y(18)-98++, y(19)++

**Precursor origin neutral loss:** +

## Peptide No.631

**NESPAAIHPCGNPTVIEDALEK**

**Confirmed sites:** @S:4

**Ambiguous sites:**

MS/MS Fragmentation of **NESPAAIHPCGNPTVIEDALEK**

Found in **LMOD2\_MOUSE**, Leiomodrin-2 OS=Mus musculus GN=Lmod2 PE=1 SV=1

Match to Query 7829: 2584.189110 from(862.403646,3+)

Title: Elution from: 51.843 to 51.843 scan no 5126 cid35.00 polarity:+:MA10:m1s



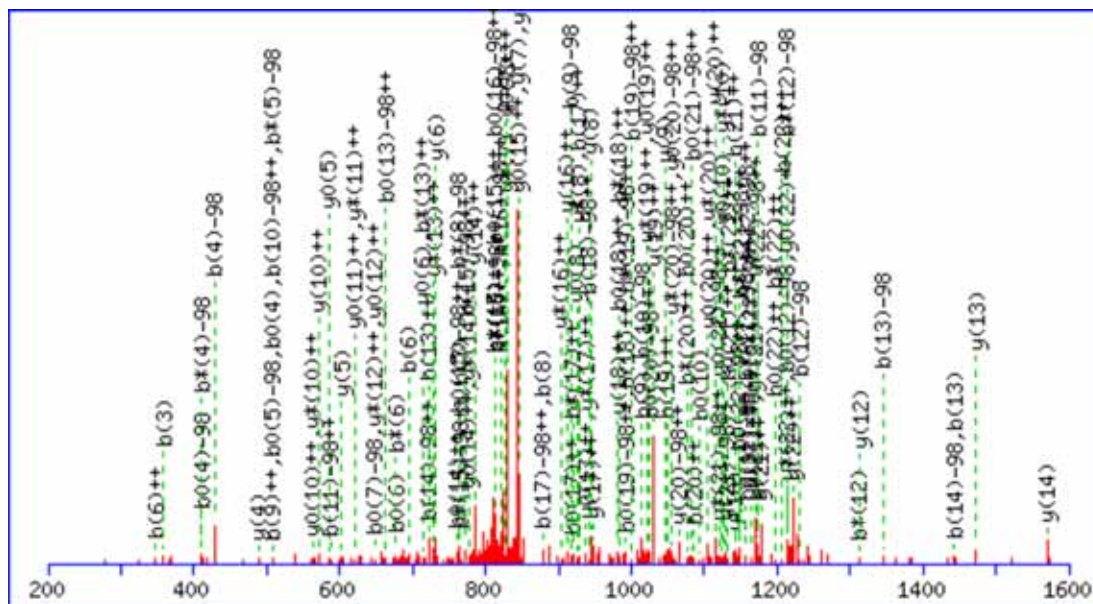

**Monoisotopic mass of neutral peptide Mr(calc):** 2584.1880

**Fixed modifications:** Carbamidomethyl (C) (apply to specified residues or termini only)

**Variable modifications:**

**N-term :** Dimethyl (N-term)

**S4 :** Phospho (ST), with neutral losses 0.0000(shown in table), 97.9769

**K23 :** Dimethyl (K)

**Ions Score:** 42 **Expect:** 0.0054

**Matched b ions:** b(3), b(4)-98, b(6)++, b(6), b(7), b(8), b(9), b(9)++, b(9)-98, b(10)-98, b(10)-98++, b(11)-98, b(11)-98++, b(12)-98, b(13)-98, b(13)++, b(13), b(14)-98, b(14)-98++, b(15)-98++, b(15)++, b(16)-98++, b(17)-98++, b(17)++, b(18)-98++, b(18)++, b(19)++, b(19)-98++, b(20)++, b(21)++, b(22)-98++, b(22)++

**Matched y ions:** y(4), y(5), y(6), y(7), y(8), y(9), y(10)++, y(10), y(12), y(13), y(14), y(14)++, y(16)++, y(17)++, y(18)++, y(19)++, y(20)++, y(20)-98++, y(21)++, y(21)-98++, y(22)++, y(22)-98++

**Precursor origin neutral loss:** +

## Peptide No.632

**NSSSGSNSGSSSSMPAR**

**Confirmed sites:** @S:13

**Ambiguous sites:**

**MS/MS Fragmentation of NSSSGSNSGSSSSMPAR**

Found in **MKL2\_MOUSE**, MKL/myocardin-like protein 2 OS=Mus musculus GN=Mkl2 PE=1 SV=1

Match to Query 3217: 1728.678594 from(577.233474,3+)

Title: Elution from: 23.104 to 23.104 scan no 1247 cid35.00 polarity:+:MA10:m1s









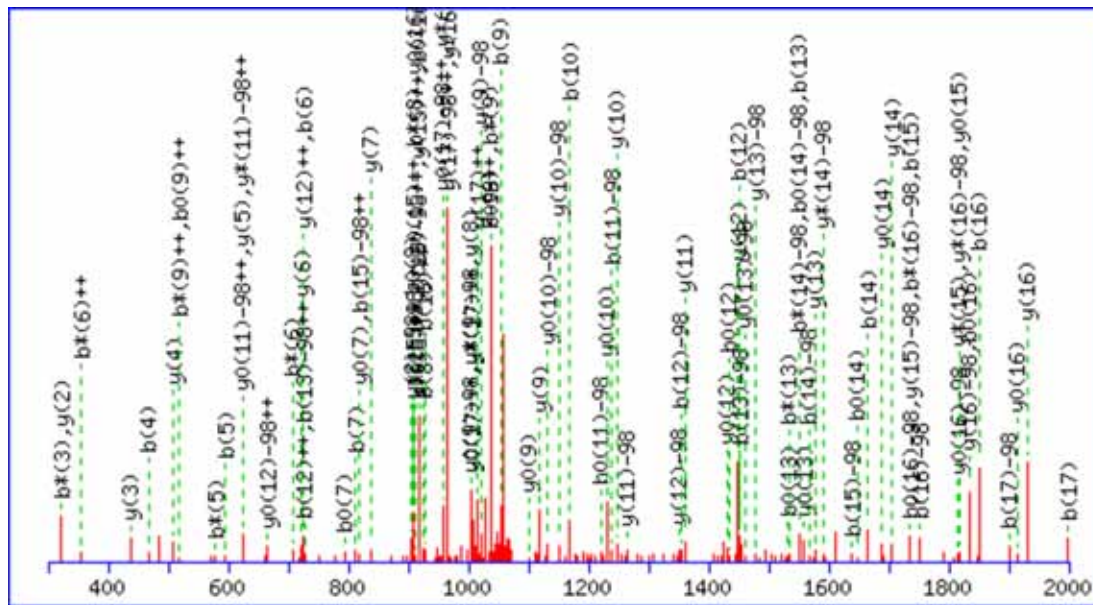

**Monoisotopic mass of neutral peptide Mr(calc):** 2171.9147

**Fixed modifications:** Carbamidomethyl (C) (apply to specified residues or termini only)

**Variable modifications:**

**N-term :** Dimethyl (N-term)

**S11 :** Phospho (ST), with neutral losses 97.9769(shown in table), 0.0000

**K18 :** Dimethyl (K)

**Ions Score:** 94 **Expect:** 1.8e-008

**Matched b ions:** b(4), b(5), b(6), b(7), b(8), b(9), b(10), b(11)-98, b(12), b(12)-98, b(12)++, b(13), b(13)-98++, b(13)-98, b(14), b(14)-98, b(15), b(15)-98, b(15)-98++, b(16), b(16)-98, b(16)++, b(17), b(17)-98

**Matched y ions:** y(2), y(3), y(4), y(5), y(6), y(7), y(8), y(8)-98, y(9)-98, y(9), y(10), y(10)-98, y(11), y(11)-98, y(12)++, y(12), y(12)-98, y(13), y(13)-98, y(14), y(15)++, y(15)-98, y(16)-98++, y(16)++, y(16), y(16)-98, y(17)-98++, y(17)++

**Precursor origin neutral loss:** +

## Peptide No.636

**NVPQEELEDSDVDADFK**

**Confirmed sites: @S:7**

**Ambiguous sites:**

MS/MS Fragmentation of **NVPQEELEDSDVDADFK**

Found in **IMA3\_MOUSE**, Importin subunit alpha-3 OS=Mus musculus GN=Kpna3 PE=1 SV=1

Match to Query 5415: 2171.915450 from(1086.965001,2+)

Title: Elution from: 49.343 to 49.343 scan no 4597 cid35.00 polarity:+:MA10:m1s

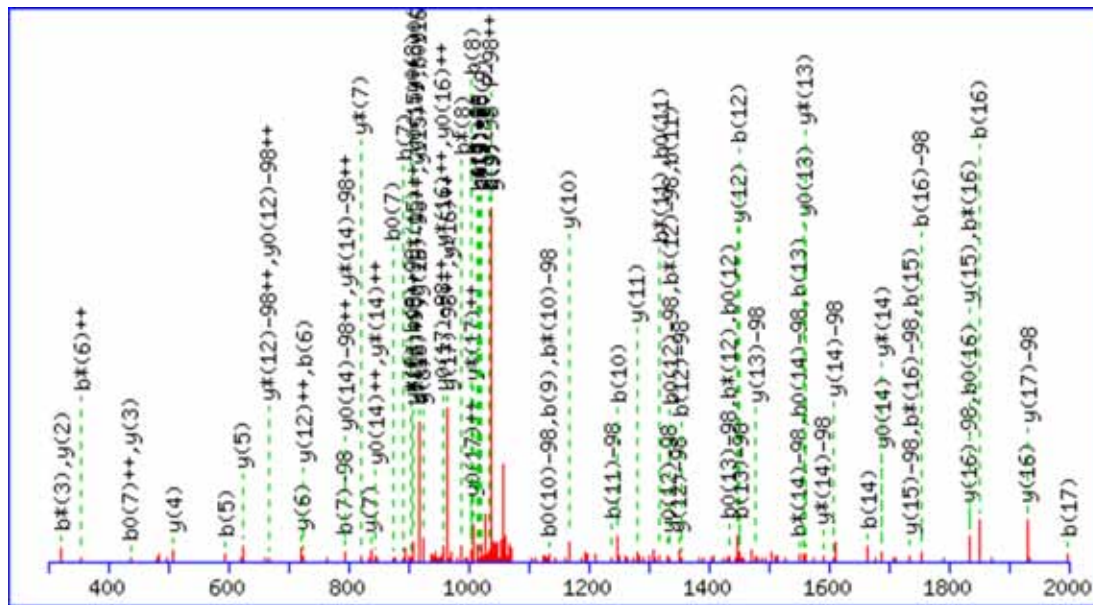

**Monoisotopic mass of neutral peptide Mr(calc):** 2171.9147

**Fixed modifications:** Carbamidomethyl (C) (apply to specified residues or termini only)

**Variable modifications:**

**N-term :** Dimethyl (N-term)

**S7 :** Phospho (ST), with neutral losses 97.9769(shown in table), 0.0000

**K18 :** Dimethyl (K)

**Ions Score:** 88 **Expect:** 7.1e-008

**Matched b ions:** b(5), b(6), b(7)-98, b(7), b(8)-98, b(8), b(9), b(9)-98, b(10), b(11), b(11)-98, b(12), b(12)-98, b(13), b(13)-98, b(14), b(15), b(16)-98, b(16), b(17)

**Matched y ions:** y(2), y(3), y(4), y(5), y(6), y(7), y(8), y(9), y(10), y(11), y(12)-98, y(12), y(12)++, y(13)-98, y(14)-98, y(15)++, y(15)-98, y(15), y(16)-98++, y(16)++, y(16), y(16)-98, y(17)-98++, y(17)-98, y(17)++

**Precursor origin neutral loss:** +

## Peptide No.637

**NVPQESLESDVDADFK**

**Confirmed sites:** @S:7,@S:11

**Ambiguous sites:**

**MS/MS Fragmentation of NVPQESLESDVDADFK**

Found in **IMA3\_MOUSE**, Importin subunit alpha-3 OS=Mus musculus GN=Kpna3 PE=1 SV=1

Match to Query 7504: 2251.882466 from(1126.948509,2+)

Title: Elution from: 51.668 to 51.668 scan no 5158 cid35.00 polarity:+:MA10:m1s









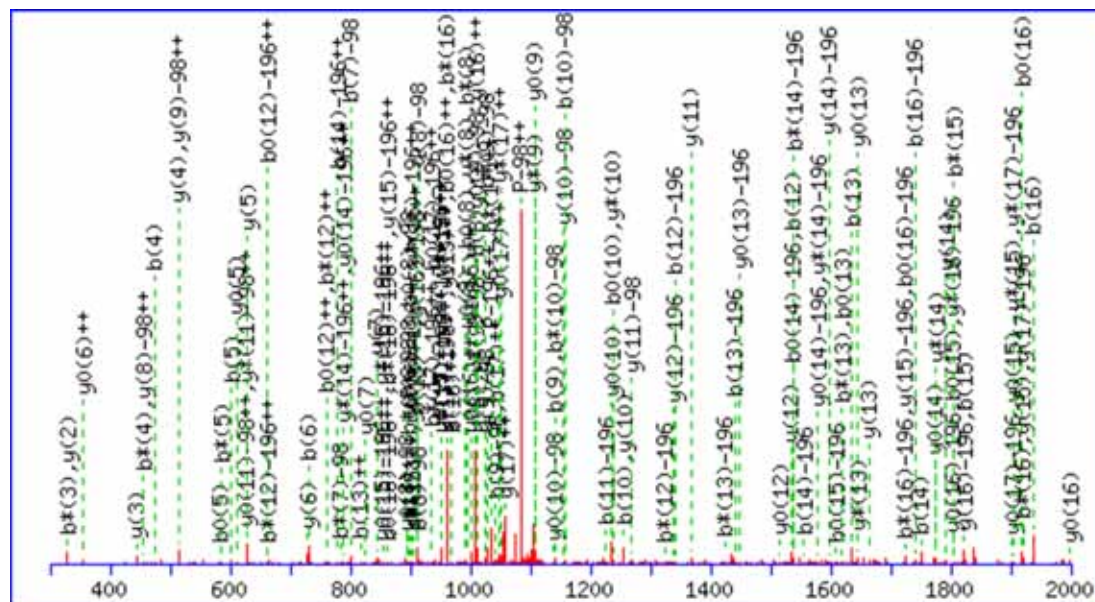

**Monoisotopic mass of neutral peptide Mr(calc):** 2263.9447

**Fixed modifications:** Carbamidomethyl (C) (apply to specified residues or termini only)

**Variable modifications:**

**N-term :** Dimethyl:2H(4)13C(2) (N-term)

**S7 :** Phospho (ST), with neutral losses 0.0000(shown in table), 97.9769

**S11 :** Phospho (ST), with neutral losses 0.0000(shown in table), 97.9769

**K18 :** Dimethyl:2H(4)13C(2) (K)

**Ions Score:** 61 **Expect:** 3.2e-005

**Matched b ions:** b(4), b(5), b(6), b(7)-98, b(8)-98, b(8), b(9), b(9)-98, b(10), b(10)-98, b(11)-98++, b(11)-196, b(11)-98, b(12)-98, b(12), b(12)-196, b(13), b(13)-98, b(13)++, b(13)-196, b(14), b(14)-98, b(14)-196++, b(14)-196, b(15), b(15)++, b(15)-98, b(15)-98++, b(16)-98, b(16), b(16)-196, b(16)-98++, b(16)++, b(17)-98, b(17)-98++, b(17)++

**Matched y ions:** y(2), y(3), y(4), y(5), y(6), y(7), y(8)-98, y(8), y(8)-98++, y(9)-98++, y(9)-98, y(10), y(10)-98, y(11), y(11)-98, y(12)-98, y(12), y(12)-196, y(13), y(13)-98, y(13)-98++, y(14)-98++, y(14)++, y(14)-98, y(14), y(14)-196, y(15)++, y(15)-98, y(15)-98++, y(15)-196, y(15), y(15)-196++, y(16)-98++, y(16)-196, y(16)-196++, y(16)++, y(16)-98, y(17)-196++, y(17)-98++, y(17)++, y(17)-196

**Precursor origin neutral loss:** +

## Peptide No.641

**NVSADDDAVYICETTEGSR**

**Confirmed sites:** @S:3

**Ambiguous sites:**

MS/MS Fragmentation of **NVSADDDAVYICETTEGSR**

Found in **OBSCN\_MOUSE**, Obscurin OS=Mus musculus GN=Obscn PE=2 SV=2

Match to Query 6015: 2208.890180 from(1105.452366,2+)

Title: Elution from: 48.014 to 48.014 scan no 4513 cid35.00 polarity:+:MA10:m1s



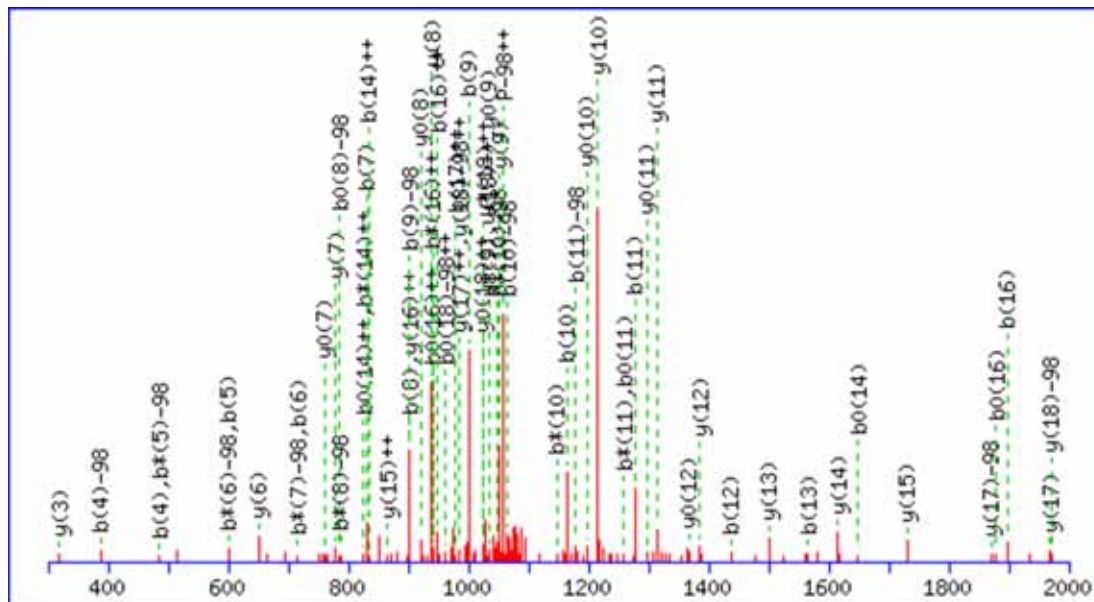

**Monoisotopic mass of neutral peptide Mr(calc):** 2214.9200

**Fixed modifications:** Carbamidomethyl (C) (apply to specified residues or termini only)

**Variable modifications:**

**N-term :** Dimethyl:2H(4)13C(2) (N-term)

**S3 :** Phospho (ST), with neutral losses 0.0000(shown in table), 97.9769

**Ions Score:** 80 **Expect:** 4.6e-007

**Matched b ions:** b(4)-98, b(4), b(5), b(6), b(7), b(8), b(9), b(9)-98, b(10), b(10)-98, b(11), b(11)-98, b(12), b(13), b(14)++, b(16), b(16)++, b(17)++

**Matched y ions:** y(3), y(6), y(7), y(8), y(9), y(10), y(11), y(12), y(13), y(14), y(15), y(15)++, y(16)++, y(17), y(17)-98, y(17)++, y(18)-98, y(18)-98++, y(18)++

**Precursor origin neutral loss:** +

## Peptide No.643

**QADVADQQTTELPAENGETENQSPASEEEK**

**Confirmed sites:** @S:23,@S:26

**Ambiguous sites:**

MS/MS Fragmentation of **QADVADQQTTELPAENGETENQSPASEEEK**

Found in **HMG1\_MOUSE**, Non-histone chromosomal protein HMG-14 OS=Mus musculus GN=Hmgn1 PE=1 SV=2

Match to Query 8781: 3460.408528 from(866.109408,4+)

Title: Elution from: 40.463 to 40.463 scan no 3728 cid35.00 polarity:+MA10:m1s



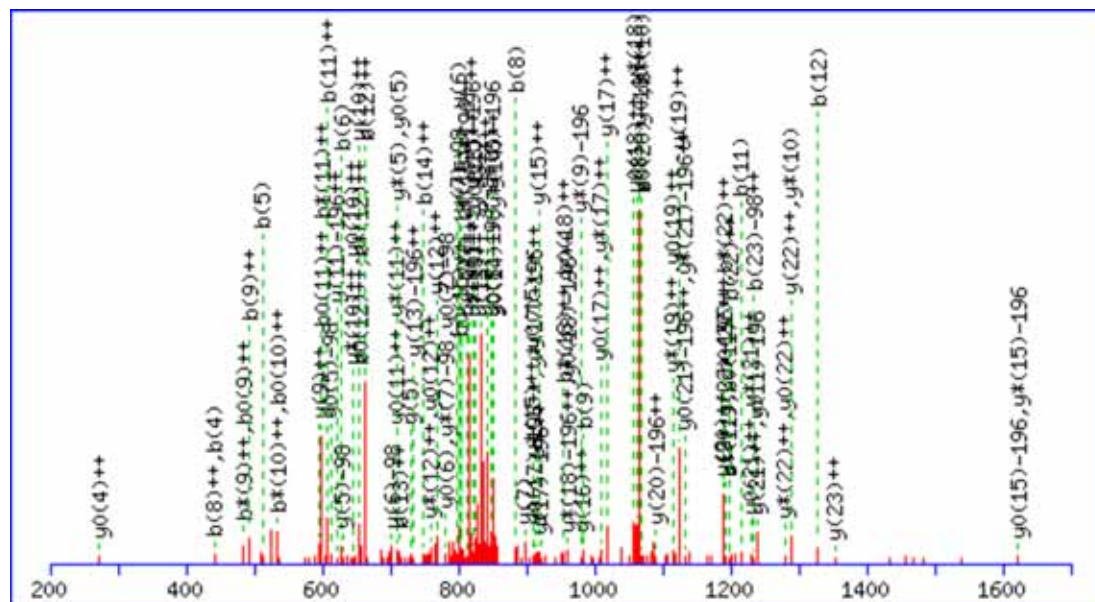

**Monoisotopic mass of neutral peptide Mr(calc):** 3460.4079

**Fixed modifications:** Carbamidomethyl (C) (apply to specified residues or termini only)

**Variable modifications:**

**N-term :** Dimethyl (N-term)

**S23 :** Phospho (ST), with neutral losses 0.0000(shown in table), 97.9769

**S26 :** Phospho (ST), with neutral losses 0.0000(shown in table), 97.9769

**K30 :** Dimethyl (K)

**Ions Score:** 64 **Expect:** 2.7e-005

**Matched b ions:** b(4), b(5), b(6), b(8)++, b(8), b(9)++, b(9), b(11)++, b(11), b(12)++, b(12), b(13)++, b(14)++, b(15)++, b(22)++, b(23)-98++

**Matched y ions:** y(5), y(5)-98, y(6)-98, y(6), y(7), y(7)-98, y(8), y(8)-98++, y(9)++, y(9), y(10)++, y(10)-98++, y(11)-196, y(11)-196++, y(12)++, y(13)++, y(13)-196++, y(14)-98++, y(15)++, y(15)-196++, y(16)++, y(17)++, y(17)-196++, y(18)++, y(18)-98++, y(19)++, y(20)++, y(20)-98++, y(20)-196++, y(21)++, y(21)-98++, y(22)++, y(22)-196++, y(22)-98++, y(23)++

**Precursor origin neutral loss:** +

## Peptide No.644

**QADVADQQTTELPAENGETENQSPASEEEK**

**Confirmed sites:** @T:19,@S:26

**Ambiguous sites:**

MS/MS Fragmentation of **QADVADQQTTELPAENGETENQSPASEEEK**

Found in **HMG1\_MOUSE**, Non-histone chromosomal protein HMG-14 OS=Mus musculus GN=Hmgn1 PE=1 SV=2

Match to Query 8782: 3460.409067 from(1154.476965,3+)

Title: Elution from: 40.278 to 40.278 scan no 3703 cid35.00 polarity:+:MA10:m1s

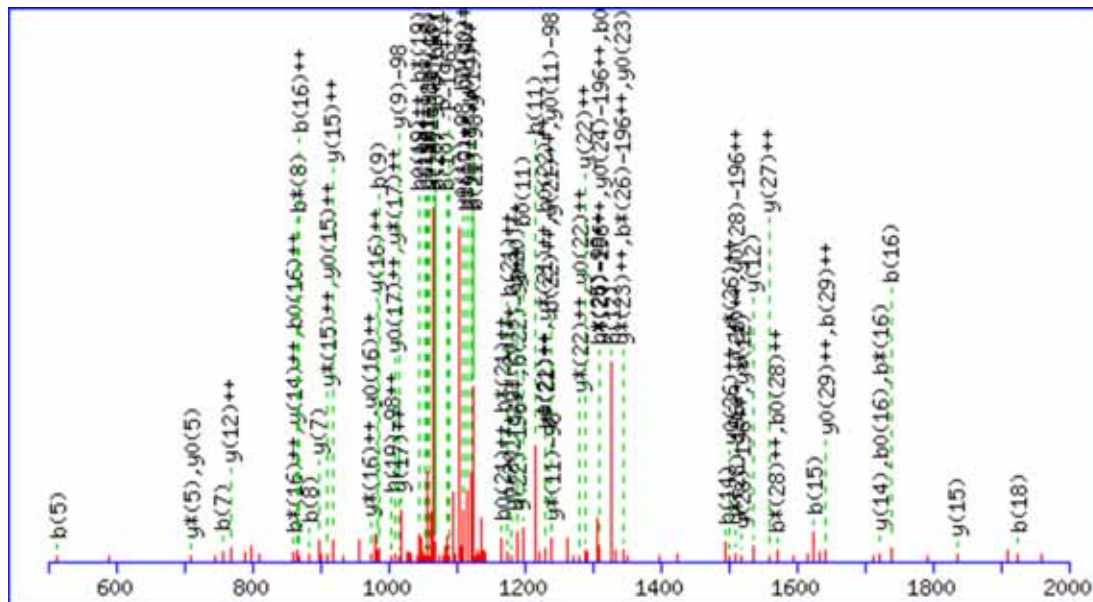

**Monoisotopic mass of neutral peptide Mr(calc):** 3460.4079

**Fixed modifications:** Carbamidomethyl (C) (apply to specified residues or termini only)

**Variable modifications:**

**N-term :** Dimethyl (N-term)

**T19 :** Phospho (ST), with neutral losses 0.0000(shown in table), 97.9769

**S26 :** Phospho (ST), with neutral losses 0.0000(shown in table), 97.9769

**K30 :** Dimethyl (K)

**Ions Score:** 55 **Expect:** 0.00023

**Matched b ions:** b(5), b(7), b(8), b(9), b(10), b(11), b(12), b(14), b(15), b(16), b(16)++, b(18), b(19)-98++, b(19)++, b(20)-98++, b(21)-98++, b(21)++, b(22)++, b(22)-98++, b(29)++, b(29)-98++

**Matched y ions:** y(7), y(9)-98, y(12), y(12)++, y(14), y(14)++, y(15)-98, y(15), y(15)++, y(15)-98++, y(16)++, y(16)-98++, y(17)++, y(18)++, y(18)-98++, y(19)++, y(19)-98++, y(20)++, y(20)-98++, y(21)++, y(22)-98++, y(22)++, y(22)-196++, y(26)++, y(27)-98++, y(27)++, y(28)-196++

**Precursor origin neutral loss:** +

## Peptide No.645

**QASTDAGTAGALTPQHVR**

**Confirmed sites:** @S:3

**Ambiguous sites:**

MS/MS Fragmentation of **QASTDAGTAGALTPQHVR**

Found in **YAP1\_MOUSE**, Yorkie homolog OS=Mus musculus GN=Yap1 PE=1 SV=2

Match to Query 3807: 1887.884565 from(630.302131,3+)

Title: Elution from: 30.137 to 30.137 scan no 2028 cid35.00 polarity:+:MA10

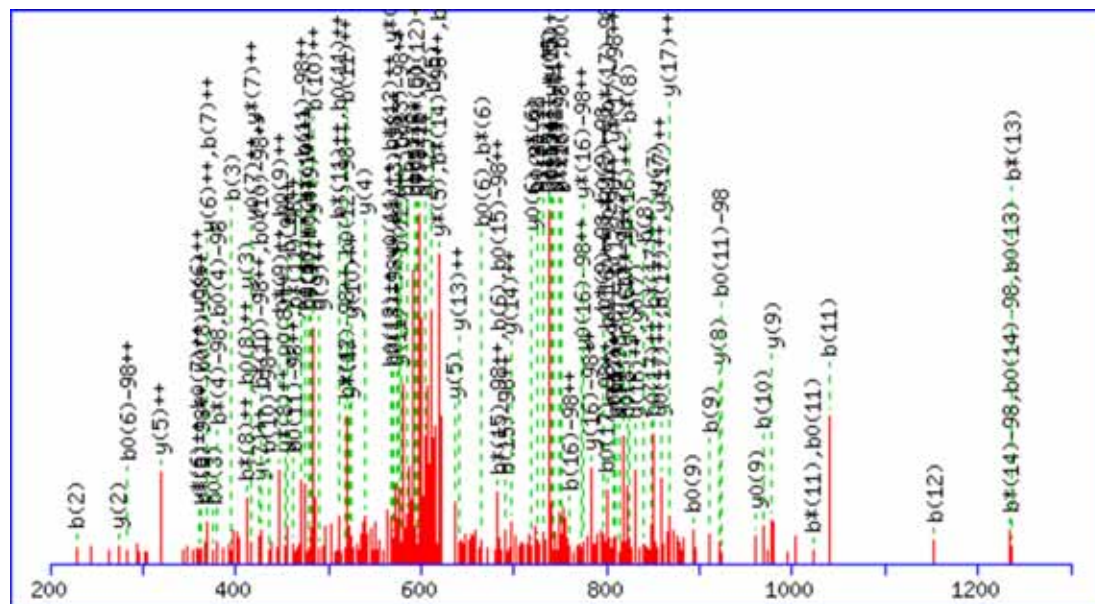

**Monoisotopic mass of neutral peptide Mr(calc):** 1887.8840

**Fixed modifications:** Carbamidomethyl (C) (apply to specified residues or termini only)

**Variable modifications:**

**N-term :** Dimethyl (N-term)

**S3 :** Phospho (ST), with neutral losses 0.0000(shown in table), 97.9769

**Ions Score:** 41 **Expect:** 0.0058

**Matched b ions:** b(2), b(3), b(5), b(6), b(6)-98, b(7)++, b(7), b(8)-98, b(8), b(9), b(9)++, b(9)-98, b(10)++, b(10), b(10)-98, b(11), b(11)++, b(11)-98, b(12), b(12)++, b(13)-98, b(15)-98, b(15)++, b(16)-98, b(16)++, b(17)++, b(17)-98

**Matched y ions:** y(2), y(3), y(4), y(5)++, y(5), y(6), y(6)++, y(7), y(7)++, y(8), y(9), y(9)++, y(10)++, y(11)++, y(12)++, y(13)++, y(14)++, y(15)++, y(16)++, y(16)-98, y(17)-98, y(17)++

**Precursor origin neutral loss:** +

## Peptide No.646

**QASTDAGTAGALTPQHVR**

**Confirmed sites:** @T:4

**Ambiguous sites:**

**MS/MS Fragmentation of** **QASTDAGTAGALTPQHVR**

Found in **YAP1\_MOUSE**, Yorkie homolog OS=Mus musculus GN=Yap1 PE=1 SV=2

Match to Query 4987: 1887.884190 from(630.302006,3+)

Title: Elution from: 30.334 to 30.334 scan no 2350 cid35.00 polarity:+:MA10

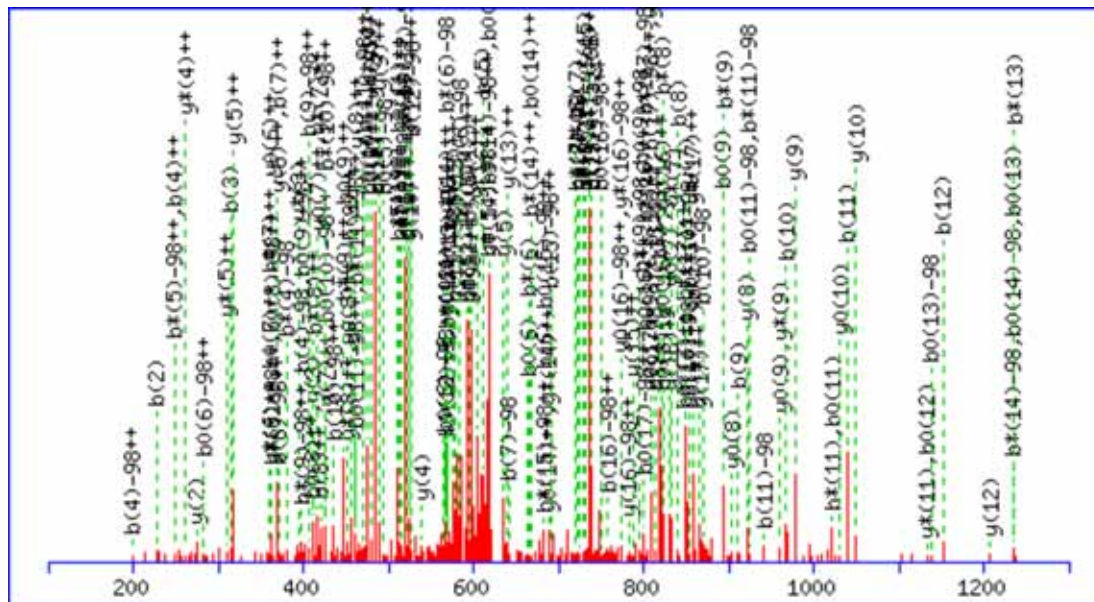

**Monoisotopic mass of neutral peptide Mr(calc):** 1887.8840

**Fixed modifications:** Carbamidomethyl (C) (apply to specified residues or termini only)

**Variable modifications:**

**N-term :** Dimethyl (N-term)

**T4 :** Phospho (ST), with neutral losses 0.0000(shown in table), 97.9769

**Ions Score:** 49 **Expect:** 0.00083

**Matched b ions:** b(2), b(3), b(4)-98, b(4)++, b(4)-98++, b(5), b(5)-98, b(6)-98, b(6), b(7)++, b(7), b(7)-98, b(8)++, b(8)-98, b(8)-98++, b(8), b(9)++, b(9), b(9)-98, b(9)-98++, b(9)-98, b(10)++, b(10), b(10)-98, b(10)-98++, b(10)-98, b(11)++, b(11), b(11)-98, b(11)-98++, b(12), b(12)++, b(12)-98, b(12)-98++, b(13)-98, b(13)-98++, b(15)-98, b(15)-98++, b(15)++, b(16)++, b(16)-98, b(16)-98++, b(17)++, b(17)-98, b(17)-98++

**Matched y ions:** y(2), y(3), y(4), y(5)++, y(5), y(6)++, y(6), y(7), y(7)++, y(8), y(8)++, y(9), y(9)++, y(10), y(10)++, y(11)++, y(12), y(12)++, y(13)++, y(15)-98, y(15)++, y(16)++, y(16)-98, y(16)-98++, y(17)-98, y(17)-98++, y(17)++

**Precursor origin neutral loss:** +

## Peptide No.647

**QDESDSEMGPPTTEPEEEDGAAFSFK**

**Confirmed sites:** @S:5

**Ambiguous sites:**

**MS/MS Fragmentation of QDESDSEMGPPTTEPEEEDGAAFSFK**

Found in **MXRA7\_MOUSE**, Matrix-remodeling-associated protein 7 OS=Mus musculus GN=Mxra7 PE=1 SV=2

Match to Query 8637: 3124.193745 from(1042.405191,3+)

Title: Elution from: 52.514 to 52.514 scan no 5202 cid35.00 polarity:+:MA10:m1s



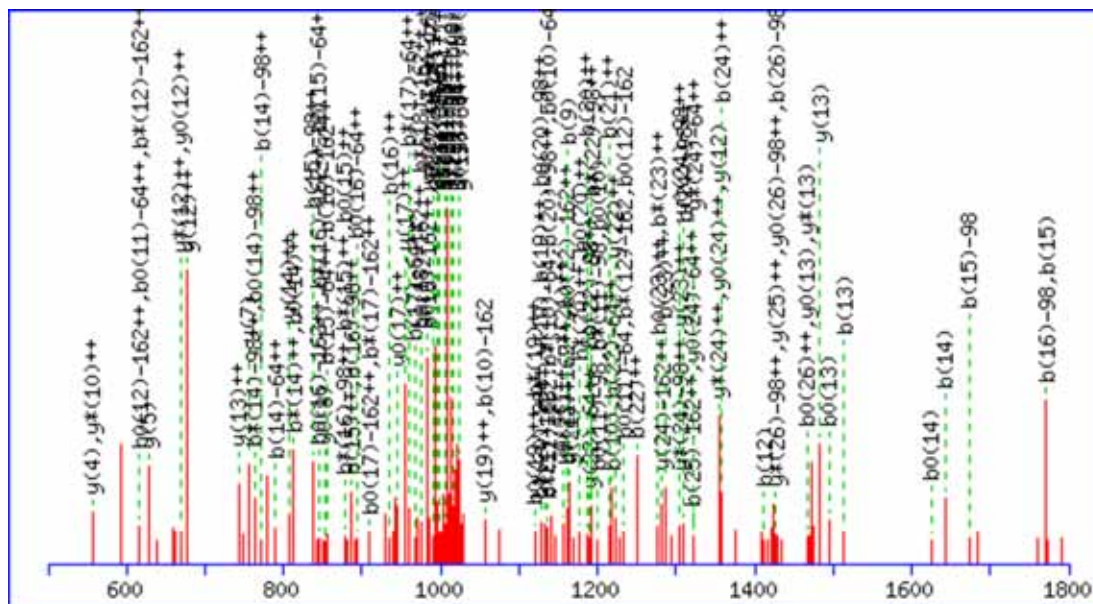

**Monoisotopic mass of neutral peptide Mr(calc):** 3124.1904

**Fixed modifications:** Carbamidomethyl (C) (apply to specified residues or termini only)

**Variable modifications:**

**N-term :** Dimethyl (N-term)

**S5 :** Phospho (ST), with neutral losses 0.0000(shown in table), 97.9769

**M9 :** Oxidation (M), with neutral losses 0.0000(shown in table), 63.9983

**K27 :** Dimethyl (K)

**Ions Score:** 31 **Expect:** 0.037

**Matched b ions:** b(8), b(9), b(10), b(12), b(13), b(14), b(14)-98++, b(15), b(15)-98++, b(15)++, b(15)-98, b(16)-98, b(16)-98++, b(16)++, b(17)++, b(18)-98++, b(19)++, b(20)-98++, b(20)++, b(21)++, b(22)++, b(23)++, b(24)++, b(24)-98++, b(26)-98++

**Matched y ions:** y(4), y(5), y(7), y(9), y(10), y(12)++, y(12), y(13), y(13)++, y(14)++, y(17)++, y(18)++, y(19)++, y(21)++, y(22)++, y(23)++, y(25)++

**Precursor origin neutral loss:** +

## Peptide No.648

**QGDNISDDEDEV**R

**Confirmed sites:** @S:6

**Ambiguous sites:**

MS/MS Fragmentation of **QGDNISDDEDEV**R

Found in **STX4\_MOUSE**, Syntaxin-4 OS=Mus musculus GN=Stx4 PE=1 SV=1

Match to Query 3092: 1598.610406 from(800.312479,2+)

Title: Elution from: 31.658 to 31.658 scan no 2533 cid35.00 polarity:+:MA10

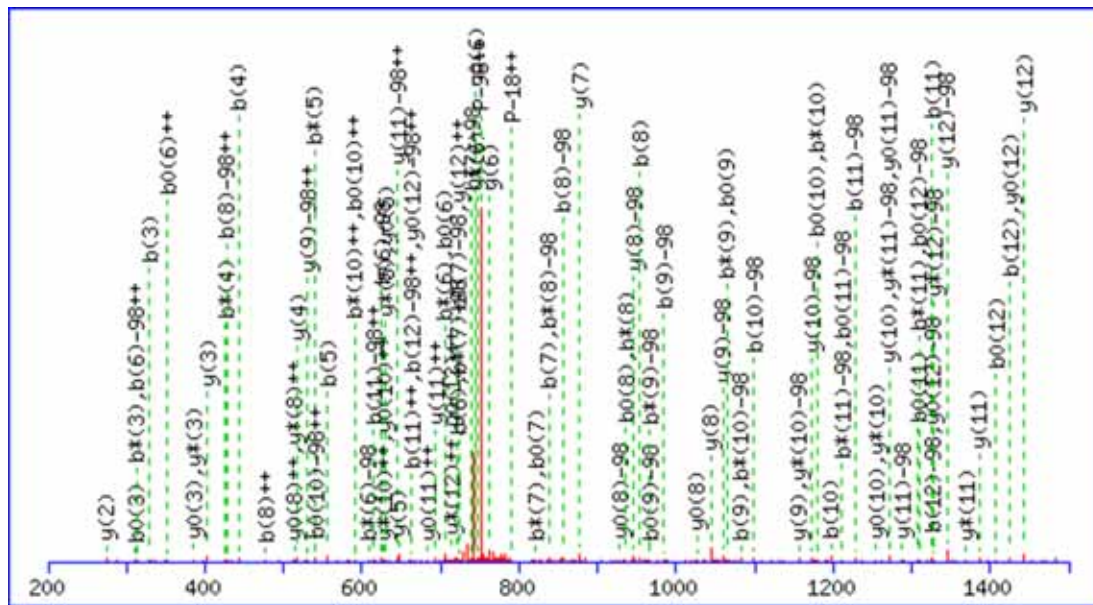

**Monoisotopic mass of neutral peptide Mr(calc):** 1598.6097

**Fixed modifications:** Carbamidomethyl (C) (apply to specified residues or termini only)

**Variable modifications:**

**N-term :** Dimethyl (N-term)

**S6 :** Phospho (ST), with neutral losses 97.9769(shown in table), 0.0000

**Ions Score:** 72 **Expect:** 9.2e-007

**Matched b ions:** b(3), b(4), b(5), b(6)-98, b(6)-98++, b(6), b(7), b(7)-98, b(8), b(8)-98++, b(8)-98, b(8)++, b(9)-98, b(9), b(10), b(10)-98, b(11), b(11)-98, b(11)-98++, b(11)++, b(12)-98, b(12), b(12)-98++  
**Matched y ions:** y(2), y(3), y(4), y(5), y(6), y(7), y(8), y(8)-98, y(9)-98, y(9), y(9)-98++, y(10)-98, y(10), y(11), y(11)-98++, y(11)-98, y(11)++, y(12)-98, y(12), y(12)++  
**Precursor origin neutral loss:** +

## Peptide No.649

**QGDNISDDEDEV**R

**Confirmed sites:** @S:6

**Ambiguous sites:**

MS/MS Fragmentation of **QGDNISDDEDEV**R

Found in **STX4\_MOUSE**, Syntaxin-4 OS=Mus musculus GN=Stx4 PE=1 SV=1

Match to Query 2688: 1604.641296 from(803.327924,2+)

Title: Elution from: 31.568 to 31.568 scan no 2353 cid35.00 polarity:+:MA10

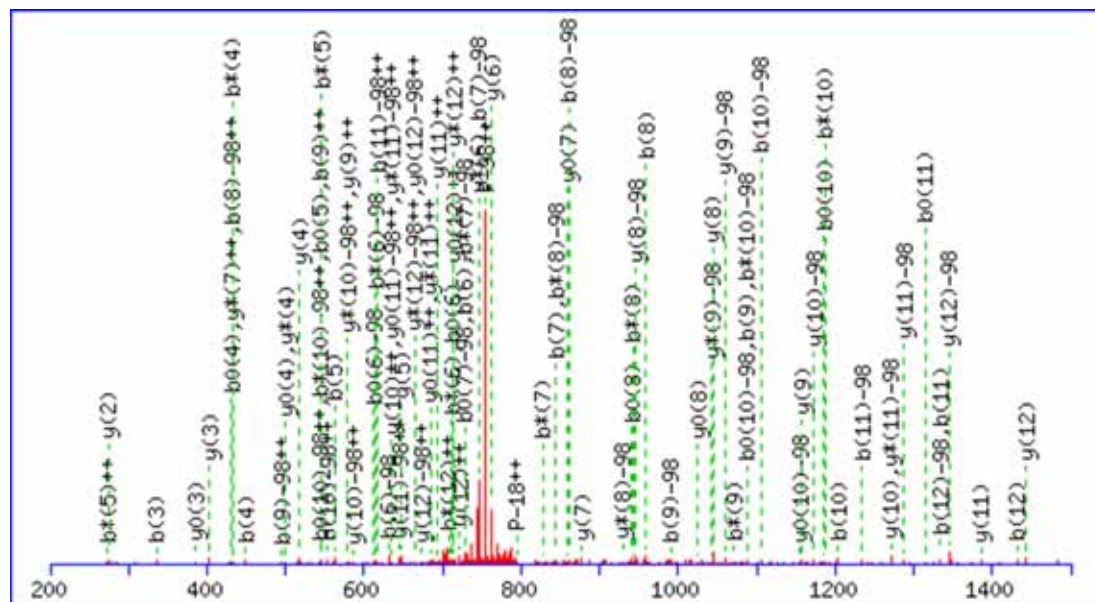

**Monoisotopic mass of neutral peptide Mr(calc):** 1604.6415

**Fixed modifications:** Carbamidomethyl (C) (apply to specified residues or termini only)

**Variable modifications:**

**N-term :** Dimethyl:2H(4)13C(2) (N-term)

**S6 :** Phospho (ST), with neutral losses 97.9769(shown in table), 0.0000

**Ions Score:** 79 **Expect:** 2.1e-007

**Matched b ions:** b(3), b(4), b(5), b(6)-98, b(6), b(7)-98, b(7), b(8), b(8)-98++, b(8)-98, b(9), b(9)++, b(9)-98++, b(9)-98, b(10), b(10)-98, b(10)-98++, b(11)-98, b(11), b(11)-98++, b(12)-98, b(12)

**Matched y ions:** y(2), y(3), y(4), y(5), y(6), y(7), y(8)-98, y(8), y(9)-98, y(9), y(9)++, y(10)-98, y(10), y(10)-98++, y(10)++, y(11), y(11)-98, y(11)-98++, y(11)++, y(12)-98, y(12), y(12)-98++, y(12)++

**Precursor origin neutral loss:** +

## Peptide No.650

**QGEMSRNENQELIR**

**Confirmed sites:** @S:5

**Ambiguous sites:**

MS/MS Fragmentation of **QGEMSRNENQELIR**

Found in **LYST\_MOUSE**, Lysosomal-trafficking regulator OS=Mus musculus GN=Lyst PE=1 SV=1

Match to Query 5104: 1816.834088 from(455.215798,4+)

Title: Elution from: 30.296 to 30.296 scan no 2259 cid35.00 polarity:+:MA10:m1s

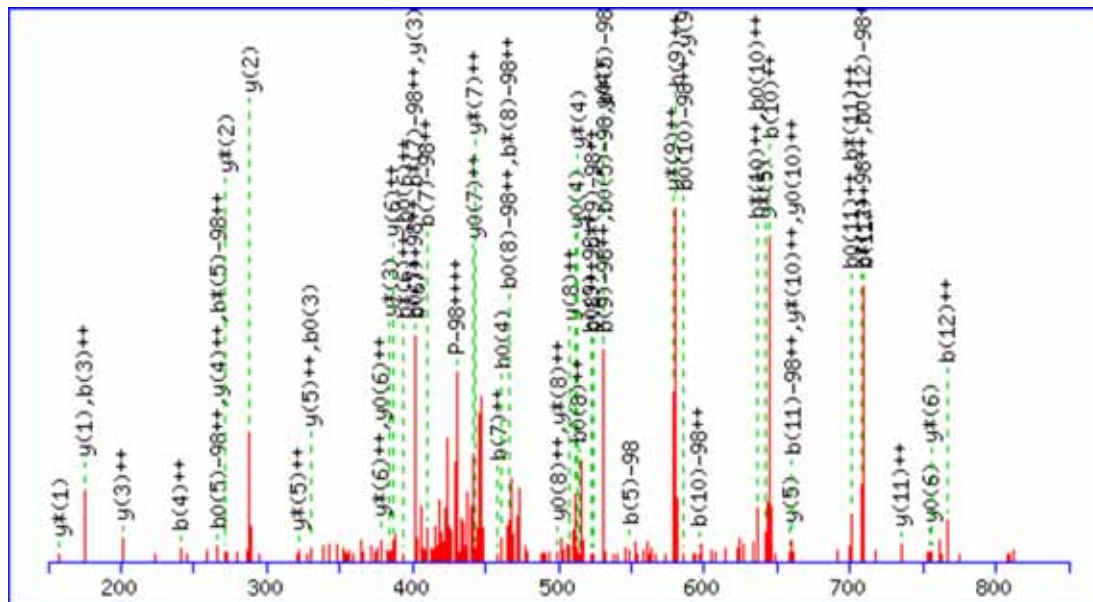

**Monoisotopic mass of neutral peptide Mr(calc):** 1816.8351

**Fixed modifications:** Carbamidomethyl (C) (apply to specified residues or termini only)

**Variable modifications:**

**N-term :** Dimethyl:2H(4)13C(2) (N-term)

**S5 :** Phospho (ST), with neutral losses 0.0000(shown in table), 97.9769

**Ions Score:** 39 **Expect:** 0.0066

**Matched b ions:** b(3)++, b(4)++, b(5)-98, b(6)++, b(7)-98++, b(7)++, b(8)++, b(9)++, b(9)-98++, b(10)++, b(10)-98++, b(11)++, b(11)-98++, b(12)++

**Matched y ions:** y(1), y(2), y(3), y(3)++, y(4), y(4)++, y(5)++, y(5), y(6)++, y(8)++, y(9)++, y(11)++

**Precursor origin neutral loss:** +

## Peptide No.651

**QHSLQMGSSVQR**

**Confirmed sites:** @S:3

**Ambiguous sites:**

**MS/MS Fragmentation of QHSLQMGSSVQR**

Found in **MYOM3\_MOUSE**, Myomesin-3 OS=Mus musculus GN=Myom3 PE=2 SV=1

Match to Query 2338: 1480.649334 from(741.331943,2+)

Title: Elution from: 20.627 to 20.627 scan no 1054 cid35.00 polarity:+:MA10



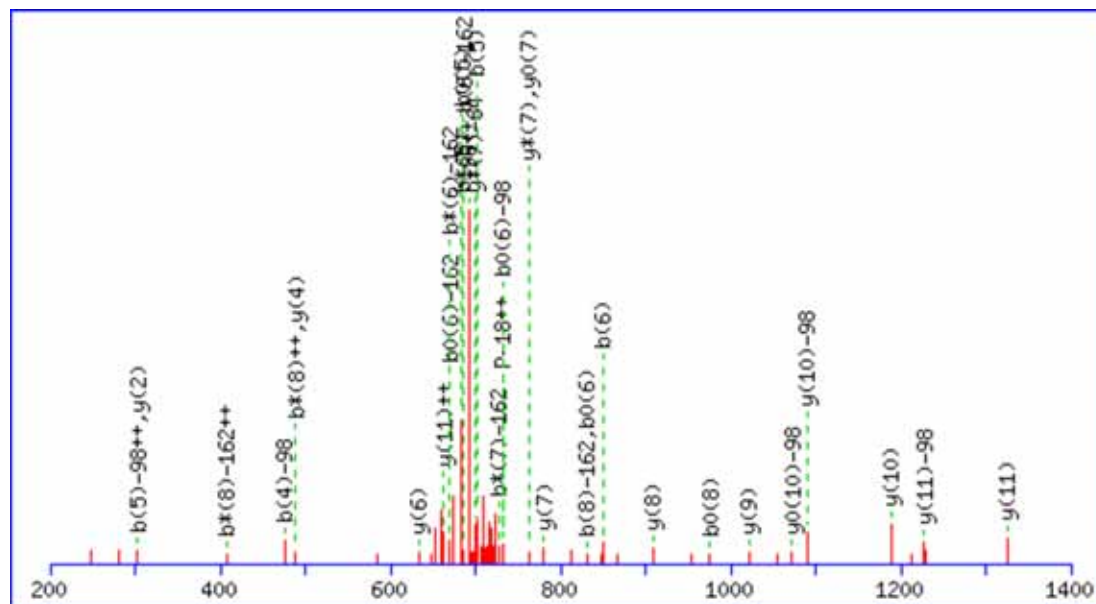

**Monoisotopic mass of neutral peptide Mr(calc):** 1480.6494

**Fixed modifications:** Carbamidomethyl (C) (apply to specified residues or termini only)

**Variable modifications:**

**N-term :** Dimethyl (N-term)

**S3 :** Phospho (ST), with neutral losses 97.9769(shown in table), 0.0000

**M6 :** Oxidation (M), with neutral losses 0.0000(shown in table), 63.9983

**Ions Score:** 35 **Expect:** 0.0093

**Matched b ions:** b(4)-98, b(5)-98+, b(5), b(6)

**Matched y ions:** y(2), y(4), y(6), y(7), y(8), y(9), y(10)-98, y(10), y(11), y(11)-98, y(11)++

**Precursor origin neutral loss:** +

## Peptide No.652

**QISYNCSDLQSNVTEETPEGEEHPVADTENK**

**Confirmed sites:** @S:3

**Ambiguous sites:**

MS/MS Fragmentation of **QISYNCSDLQSNVTEETPEGEEHPVADTENK**

Found in **PAIRB\_MOUSE**, Plasminogen activator inhibitor 1 RNA-binding protein OS=Mus musculus

GN=Serbp1 PE=1 SV=2

Match to Query 8887: 3770.580453 from(1257.867427,3+)

Title: Elution from: 44.497 to 44.497 scan no 4242 cid35.00 polarity:+:MA10:m1s



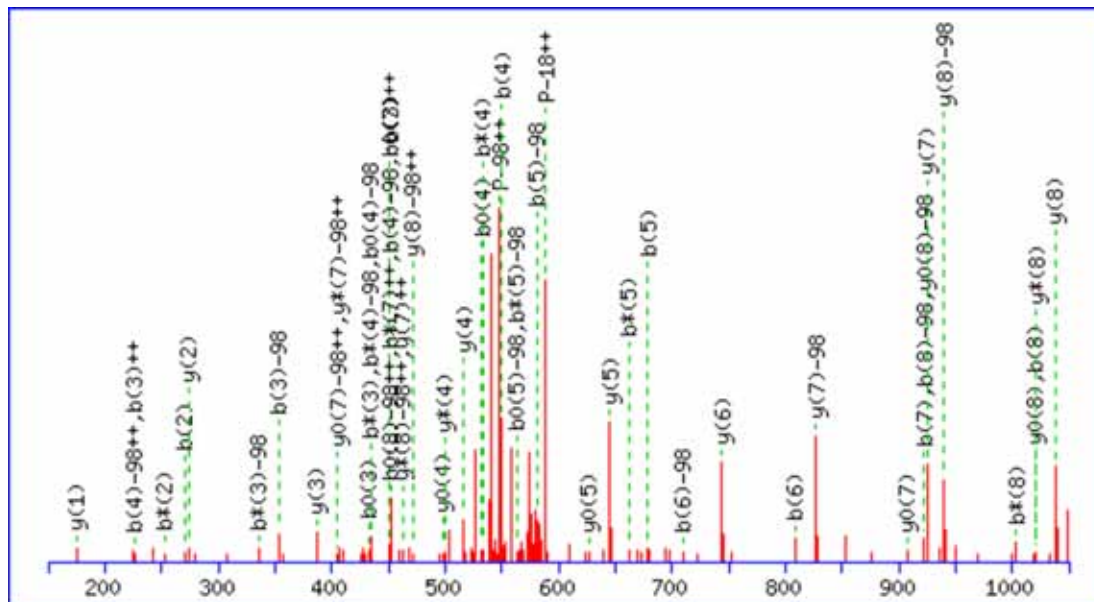

**Monoisotopic mass of neutral peptide Mr(calc):** 1193.6057

**Fixed modifications:** Carbamidomethyl (C) (apply to specified residues or termini only)

**Variable modifications:**

**N-term :** Dimethyl (N-term)

**T3 :** Phospho (ST), with neutral losses 97.9769(shown in table), 0.0000

**Ions Score:** 54 **Expect:** 0.00013

**Matched b ions:** b(2), b(3)-98, b(3), b(3)++, b(4)-98, b(4)-98++, b(4), b(5), b(5)-98, b(6), b(6)-98, b(7), b(8)-98, b(8)

**Matched y ions:** y(1), y(2), y(3), y(4), y(5), y(6), y(7)-98, y(7), y(7)++, y(8), y(8)-98, y(8)-98++

**Precursor origin neutral loss:** +

## Peptide No.654

**QITVEELVR**

**Confirmed sites:** @T:3

**Ambiguous sites:**

**MS/MS Fragmentation of QITVEELVR**

Found in **PLEC\_MOUSE**, Plectin OS=Mus musculus GN=Plec PE=1 SV=2

Match to Query 758: 1199.638696 from(600.826624,2+)

Title: Elution from: 48.655 to 48.655 scan no 4434 cid35.00 polarity:+:MA10

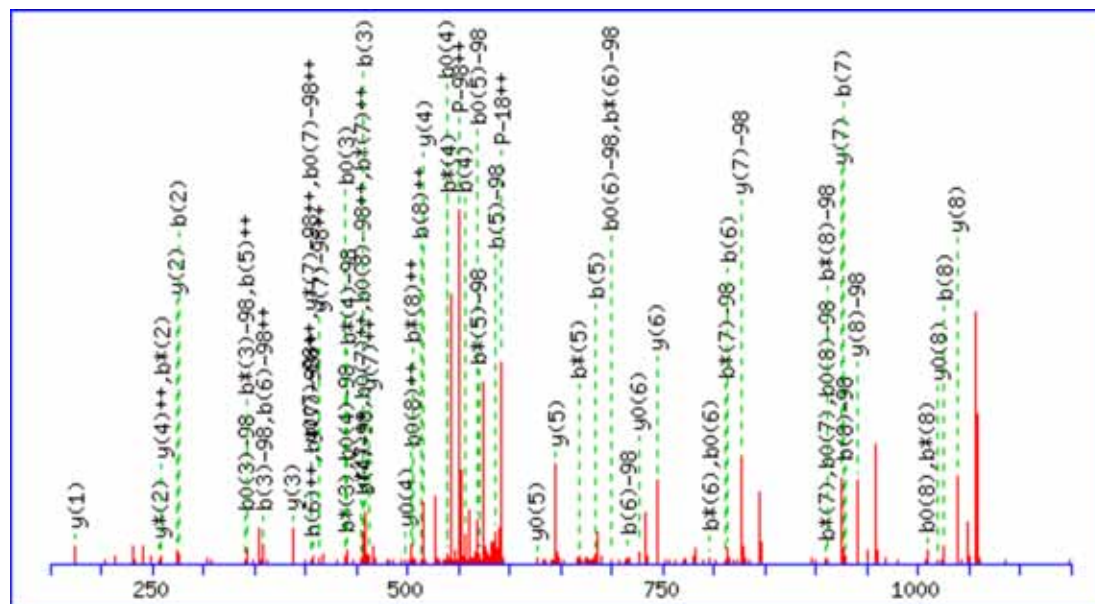

**Monoisotopic mass of neutral peptide Mr(calc):** 1199.6375

**Fixed modifications:** Carbamidomethyl (C) (apply to specified residues or termini only)

**Variable modifications:**

**N-term :** Dimethyl:2H(4)13C(2) (N-term)

**T3 :** Phospho (ST), with neutral losses 97.9769(shown in table), 0.0000

**Ions Score:** 42 **Expect:** 0.0023

**Matched b ions:** b(2), b(3)-98, b(3), b(4)-98, b(4), b(5)++, b(5), b(5)-98, b(6)-98++, b(6), b(6)++, b(6)-98, b(7), b(8), b(8)-98, b(8)++

**Matched y ions:** y(1), y(2), y(3), y(4), y(4)++, y(5), y(6), y(7)-98, y(7), y(7)-98++, y(7)++, y(8)-98, y(8)

**Precursor origin neutral loss:** +

## Peptide No.655

**QKSDAEEDGVTGSQDEEDSKPK**

**Confirmed sites:** @S:3

**Ambiguous sites:**

MS/MS Fragmentation of **QKSDAEEDGVTGSQDEEDSKPK**

Found in **CALX\_MOUSE**, Calnexin OS=Mus musculus GN=Canx PE=1 SV=1

Match to Query 7804: 2570.127705 from(857.716511,3+)

Title: Elution from: 22.878 to 22.878 scan no 1348 cid35.00 polarity:+:MA10:m1s



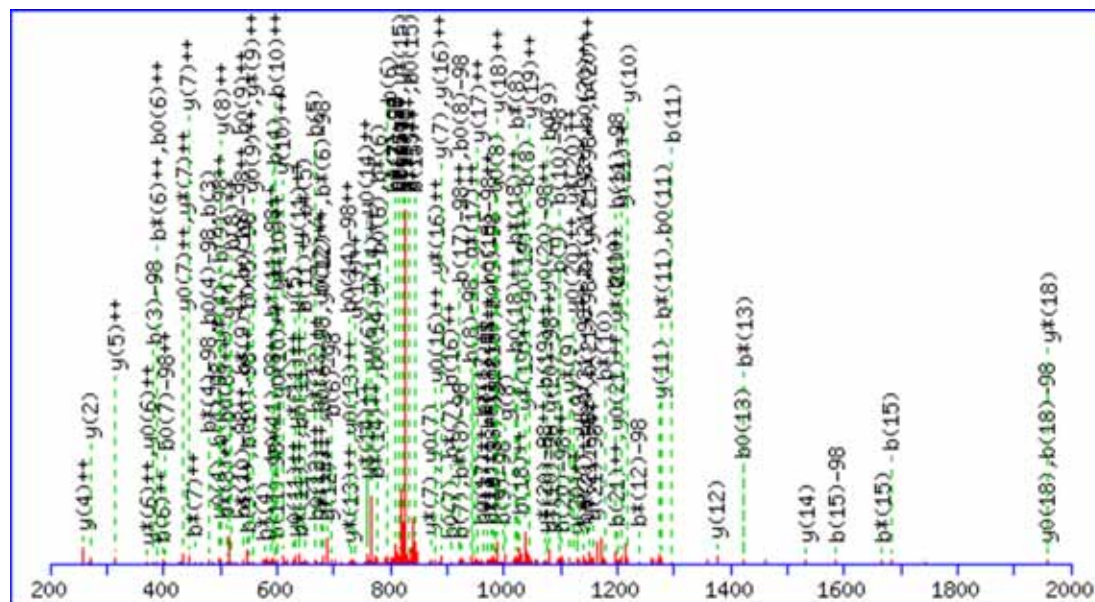

**Monoisotopic mass of neutral peptide Mr(calc):** 2570.1272

**Fixed modifications:** Carbamidomethyl (C) (apply to specified residues or termini only)

**Variable modifications:**

**N-term :** Dimethyl (N-term)

**K2 :** Dimethyl (K)

**S3 :** Phospho (ST), with neutral losses 97.9769(shown in table), 0.0000

**K20 :** Dimethyl (K)

**K22 :** Dimethyl (K)

**Ions Score:** 80 **Expect:** 6.8e-007

**Matched b ions:** b(3)-98, b(3), b(4)-98, b(4), b(5), b(6)++, b(6)-98, b(6), b(7), b(7)-98, b(8)-98, b(8), b(8)++, b(9)++, b(9)-98, b(9)-98, b(9), b(10)-98, b(10)++, b(11), b(11)-98, b(11)++, b(11)-98, b(12)++, b(15)-98, b(15), b(15)++, b(16)++, b(17)-98, b(17)++, b(18)-98, b(18)++, b(18)-98, b(19)++, b(20)++, b(20)-98, b(21)-98, b(21)++

**Matched y ions:** y(2), y(4)++, y(4), y(5), y(5)++, y(6), y(7)++, y(7), y(8)++, y(8), y(9), y(10)++, y(10), y(11)++, y(11), y(12)++, y(12), y(13)++, y(14), y(14)++, y(15)++, y(16)++, y(17)++, y(18)++, y(19)++, y(20)-98, y(20)++, y(21)++, y(21)-98

**Precursor origin neutral loss:** +

## Peptide No.656

**QKSDAEEDGVTGSQDEEDSKPK**

**Confirmed sites:** @S:3,@S:13

**Ambiguous sites:**

MS/MS Fragmentation of **QKSDAEEDGVTGSQDEEDSKPK**

Found in **CALX\_MOUSE**, Calnexin OS=Mus musculus GN=Canx PE=1 SV=1

Match to Query 7121: 2650.095585 from(884.372471,3+)

Title: Elution from: 23.663 to 23.663 scan no 1332 cid35.00 polarity:+:MA10:m1s

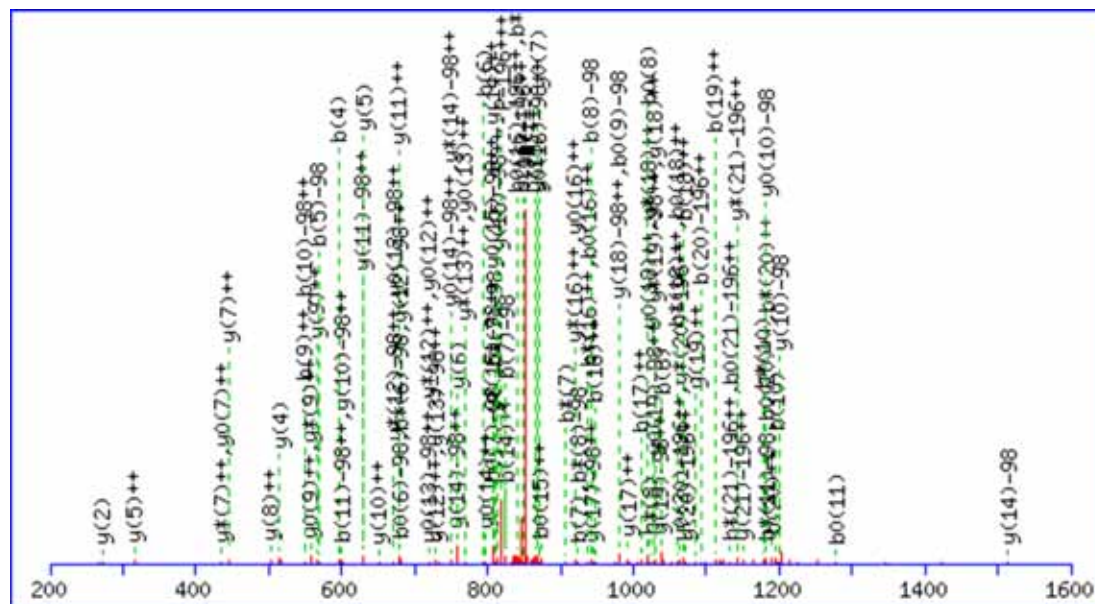

**Monoisotopic mass of neutral peptide Mr(calc):** 2650.0936

**Fixed modifications:** Carbamidomethyl (C) (apply to specified residues or termini only)

**Variable modifications:**

**N-term :** Dimethyl (N-term)

**K2 :** Dimethyl (K)

**S3 :** Phospho (ST), with neutral losses 97.9769(shown in table), 0.0000

**S13 :** Phospho (ST), with neutral losses 97.9769(shown in table), 0.0000

**K20 :** Dimethyl (K)

**K22 :** Dimethyl (K)

**Ions Score:** 52 **Expect:** 0.00032

**Matched b ions:** b(4), b(5)-98, b(6), b(7), b(7)-98, b(8), b(8)-98, b(9)++, b(10), b(10)-98, b(11)-98, b(13)-98, b(14)++, b(15)-98, b(16)-196, b(16)++, b(17)++, b(18)++, b(18)-98, b(19)++, b(19)-98, b(20)-98, b(20)++, b(20)-196, b(21)-98

**Matched y ions:** y(2), y(4), y(5)++, y(5), y(6), y(7)++, y(8)++, y(9)++, y(10)-98, y(10)++, y(10)-98, y(11)-98, y(11)++, y(12)-98, y(12)++, y(13)-98, y(14)-98, y(14)++, y(15)-98, y(15)++, y(17)++, y(17)-98, y(18)-98, y(18)++, y(19)-98, y(19)++, y(20)-196, y(20)-98, y(21)-196

**Precursor origin neutral loss:** +

## Peptide No.657

**QKSDAEEDGVTGSQDEEDSKPK**

**Confirmed sites:** @T:11,@S:13

**Ambiguous sites:**

**MS/MS Fragmentation of QKSDAEEDGVTGSQDEEDSKPK**

Found in **CALX\_MOUSE**, Calnexin OS=Mus musculus GN=Canx PE=1 SV=1

Match to Query 8022: 2650.094718 from(884.372182,3+)

Title: Elution from: 23.651 to 23.651 scan no 1451 cid35.00 polarity:+:MA10:m1s

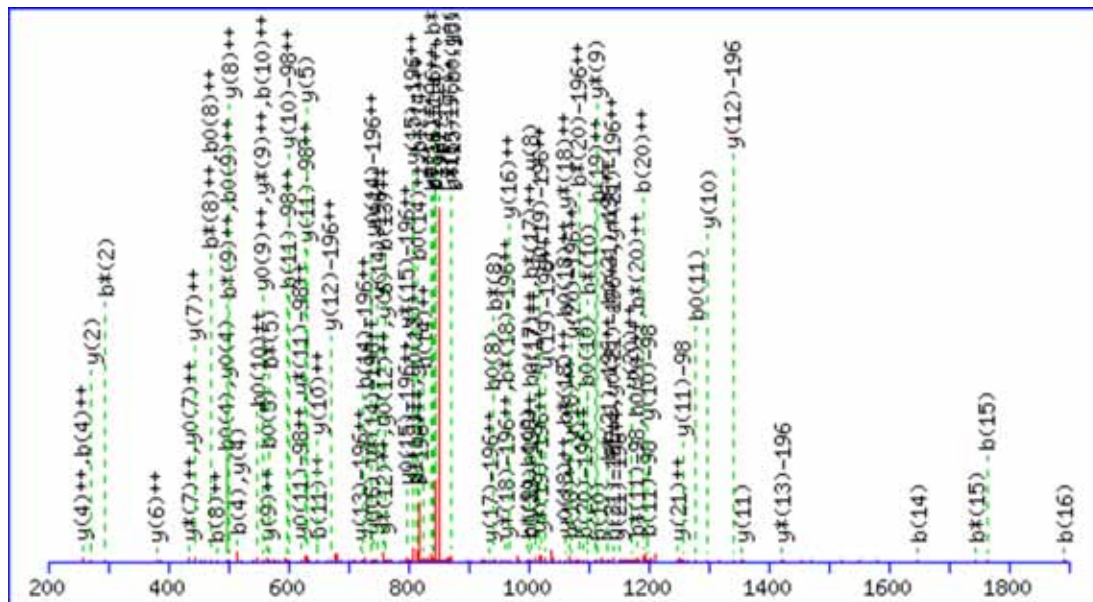

**Monoisotopic mass of neutral peptide Mr(calc):** 2650.0936

**Fixed modifications:** Carbamidomethyl (C) (apply to specified residues or termini only)

**Variable modifications:**

**N-term :** Dimethyl (N-term)

**K2 :** Dimethyl (K)

**T11 :** Phospho (ST), with neutral losses 97.9769(shown in table), 0.0000

**S13 :** Phospho (ST), with neutral losses 97.9769(shown in table), 0.0000

**K20 :** Dimethyl (K)

**K22 :** Dimethyl (K)

**Ions Score:** 33 **Expect:** 0.026

**Matched b ions:** b(4)++, b(4), b(7), b(8)++, b(10)++, b(10), b(11)-98++, b(11)++, b(11)-98, b(13)-98, b(13)++, b(14), b(14)++, b(14)-196++, b(15), b(15)-98++, b(16), b(16)-98++, b(17)++, b(17)-98++, b(18)++, b(18)-98++, b(19)++, b(20)-98++, b(20)++, b(20)-196++, b(21)-196++, b(21)-98++

**Matched y ions:** y(2), y(4)++, y(4), y(5), y(6)++, y(6), y(7)++, y(8), y(8)++, y(9)++, y(10), y(10)-98++, y(10)++, y(10)-98, y(11)-98++, y(11), y(11)-98, y(12)-196++, y(12)-196, y(12)-98++, y(13)-196++, y(14)++, y(14)-196++, y(14)-98++, y(15)-196++, y(15)-98++, y(16)-98++, y(16)-196++, y(16)++, y(17)-196++, y(17)-98++, y(18)++, y(18)-98++, y(19)-196++, y(19)-98++, y(20)-98++, y(20)-196++, y(20)++, y(21)-196++, y(21)-98++, y(21)++

**Precursor origin neutral loss:** +

## Peptide No.658

**QKSDAEEDGVTGSQDEEDSKPK**

**Confirmed sites: @T:11,@S:19**

**Ambiguous sites:**

MS/MS Fragmentation of **QKSDAEEDGVTGSQDEEDSKPK**

Found in **CALX\_MOUSE**, Calnexin OS=Mus musculus GN=Canx PE=1 SV=1

Match to Query 6286: 2650.096065 from(884.372631,3+)

Title: Elution from: 23.604 to 23.604 scan no 1337 cid35.00 polarity:+:MA10:m1s

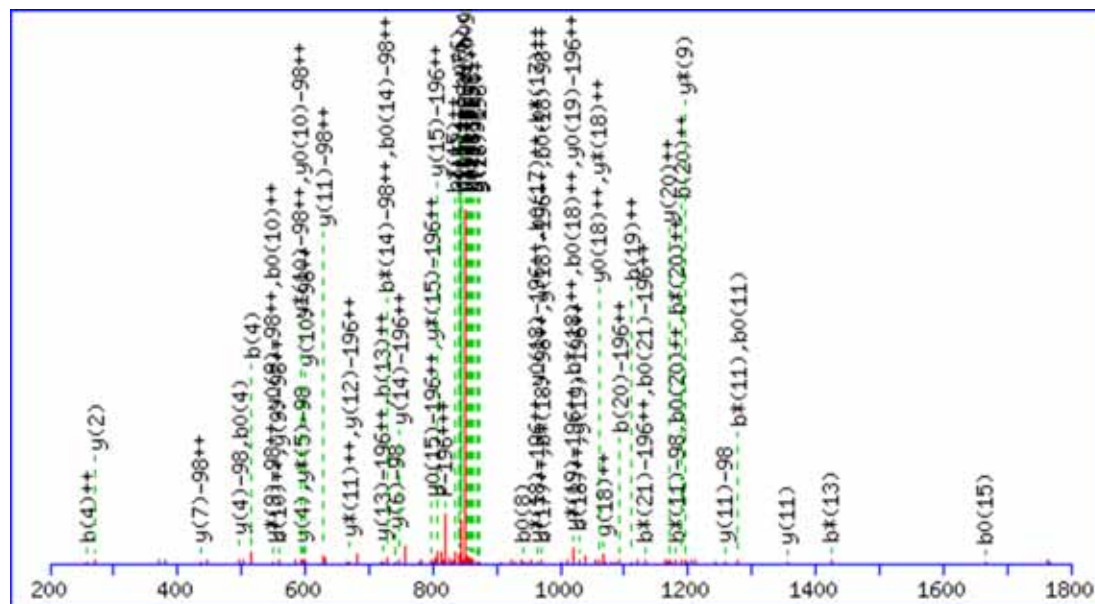

**Monoisotopic mass of neutral peptide Mr(calc):** 2650.0936

**Fixed modifications:** Carbamidomethyl (C) (apply to specified residues or termini only)

**Variable modifications:**

**N-term :** Dimethyl (N-term)

**K2 :** Dimethyl (K)

**T11 :** Phospho (ST), with neutral losses 97.9769(shown in table), 0.0000

**S19 :** Phospho (ST), with neutral losses 97.9769(shown in table), 0.0000

**K20 :** Dimethyl (K)

**K22 :** Dimethyl (K)

**Ions Score:** 38 **Expect:** 0.0081

**Matched b ions:** b(4), b(4)++, b(7), b(10)++, b(13)++, b(15)++, b(16)-98++, b(17)++, b(18)++, b(19)++, b(20)-196++, b(20)++, b(21)-98++

**Matched y ions:** y(2), y(4)-98, y(4), y(6), y(6)-98, y(7)-98++, y(7)-98, y(9)-98++, y(10)-98++, y(11)-98++, y(11), y(11)-98, y(12)-196++, y(13)-196++, y(14)++, y(14)-196++, y(14)-98++, y(15)-196++, y(15)-98++, y(16)-196++, y(18)-98++, y(18)++, y(18)-196++, y(19)-196++, y(20)-98++, y(20)++, y(21)-98++

**Precursor origin neutral loss:** +

## Peptide No.659

**QKSDAEEDGVTGSQDEEDSKPK**

**Confirmed sites:** @S:3,@S:13

**Ambiguous sites:**

MS/MS Fragmentation of **QKSDAEEDGVTGSQDEEDSKPK**

Found in **CALX\_MOUSE**, Calnexin OS=Mus musculus GN=Canx PE=1 SV=1

Match to Query 6337: 2674.222161 from(892.414663,3+)

Title: Elution from: 23.531 to 23.531 scan no 1328 cid35.00 polarity:+:MA10:m1s







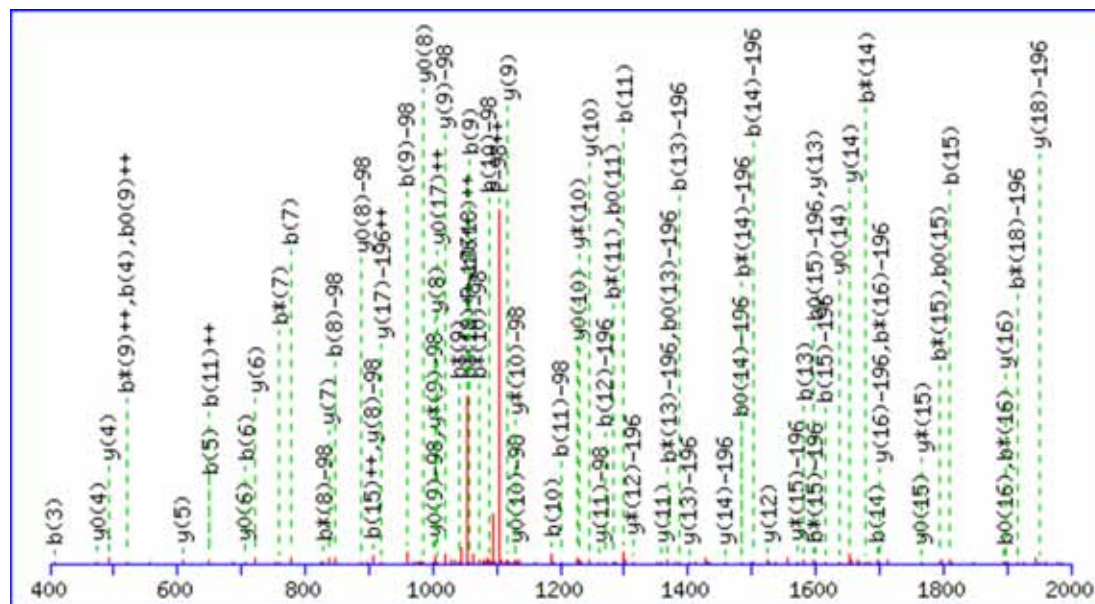

**Monoisotopic mass of neutral peptide Mr(calc):** 2301.9654

**Fixed modifications:** Carbamidomethyl (C) (apply to specified residues or termini only)

**Variable modifications:**

**N-term :** Dimethyl (N-term)

**S8 :** Phospho (ST), with neutral losses 0.0000(shown in table), 97.9769

**S12 :** Phospho (ST), with neutral losses 0.0000(shown in table), 97.9769

**K19 :** Dimethyl (K)

**Ions Score:** 52 **Expect:** 0.00032

**Matched b ions:** b(3), b(4), b(5), b(6), b(7), b(8)-98, b(9)-98, b(9), b(10), b(10)-98, b(11), b(11)++, b(11)-98, b(12)-98, b(12)-196, b(13), b(13)-98, b(13)-196, b(14), b(14)-98, b(14)-196, b(15)++, b(15)-98, b(15), b(15)-196, b(16)-98++, b(17)-98

**Matched y ions:** y(4), y(5), y(6), y(7), y(8)-98, y(8), y(9), y(9)-98, y(10), y(11), y(11)-98, y(12)-98, y(12), y(13)-98, y(13), y(13)-196, y(14)-98, y(14), y(14)-196, y(14)-98++, y(15)-98, y(16)-98, y(16), y(16)-196, y(17)-98++, y(17)-196++, y(18)-196

**Precursor origin neutral loss:** +

## Peptide No.662

**QLHIEGASLELSDDDTESK**

**Confirmed sites:** @S:12

**Ambiguous sites:**

**MS/MS Fragmentation of QLHIEGASLELSDDDTESK**

Found in **MYH10\_MOUSE**, Myosin-10 OS=Mus musculus GN=Myh10 PE=1 SV=2

Match to Query 5732: 2234.065980 from(745.695936,3+)

Title: Elution from: 48.661 to 48.661 scan no 4523 cid35.00 polarity:+:MA10

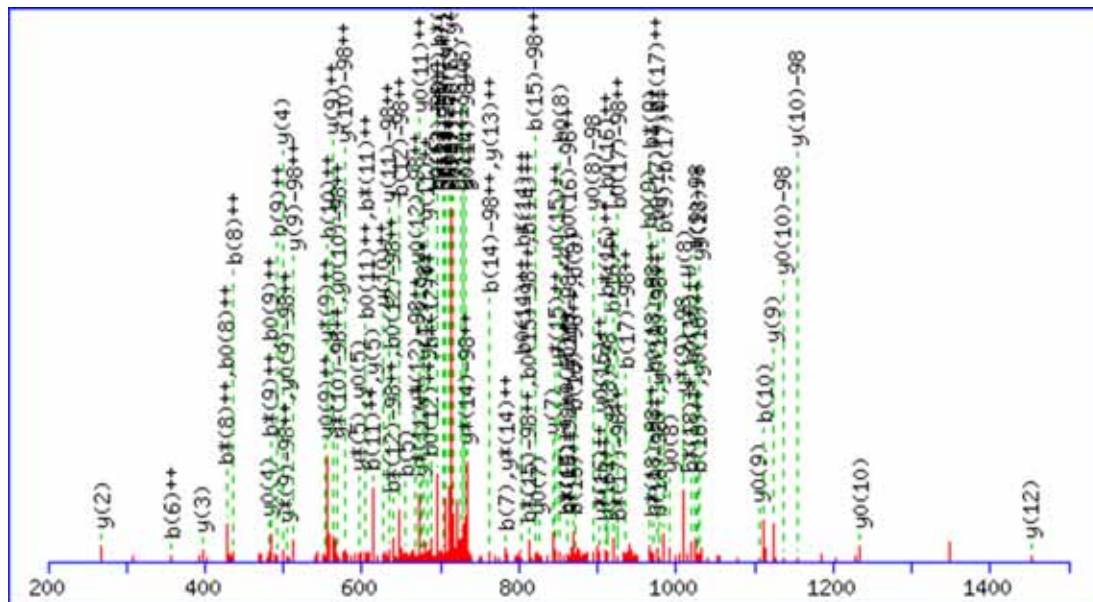

**Monoisotopic mass of neutral peptide Mr(calc):** 2234.0627

**Fixed modifications:** Carbamidomethyl (C) (apply to specified residues or termini only)

**Variable modifications:**

**N-term :** Dimethyl:2H(4)13C(2) (N-term)

**S12 :** Phospho (ST), with neutral losses 0.0000(shown in table), 97.9769

**K19 :** Dimethyl:2H(4)13C(2) (K)

**Ions Score:** 58 **Expect:** 0.00011

**Matched b ions:** b(5), b(6), b(6)++, b(7), b(8)++, b(8), b(9), b(9)++, b(10)++, b(10), b(11)++, b(12)-98++, b(12)++, b(13)-98++, b(14)++, b(14)-98++, b(15)++, b(15)-98++, b(16)++, b(16)-98++, b(17)++, b(17)-98++, b(18)-98++, b(18)++

**Matched y ions:** y(2), y(3), y(4), y(5), y(6), y(7), y(8), y(8)-98, y(9), y(9)-98, y(9)++, y(9)-98++, y(10)-98, y(10)-98++, y(10)++, y(11)-98++, y(11)++, y(12), y(12)-98++, y(12)++, y(13)-98++, y(13)++, y(16)-98++, y(16)++

**Precursor origin neutral loss:** +

## Peptide No.663

**QLHIEGASLELSDDDTESK**

**Confirmed sites:** @S:8,@S:12

**Ambiguous sites:**

MS/MS Fragmentation of **QLHIEGASLELSDDDTESK**

Found in **MYH10\_MOUSE**, Myosin-10 OS=Mus musculus GN=Myh10 PE=1 SV=2

Match to Query 6395: 2314.030218 from(772.350682,3+)

Title: Elution from: 51.302 to 51.302 scan no 4895 cid35.00 polarity:+:MA10:m1s



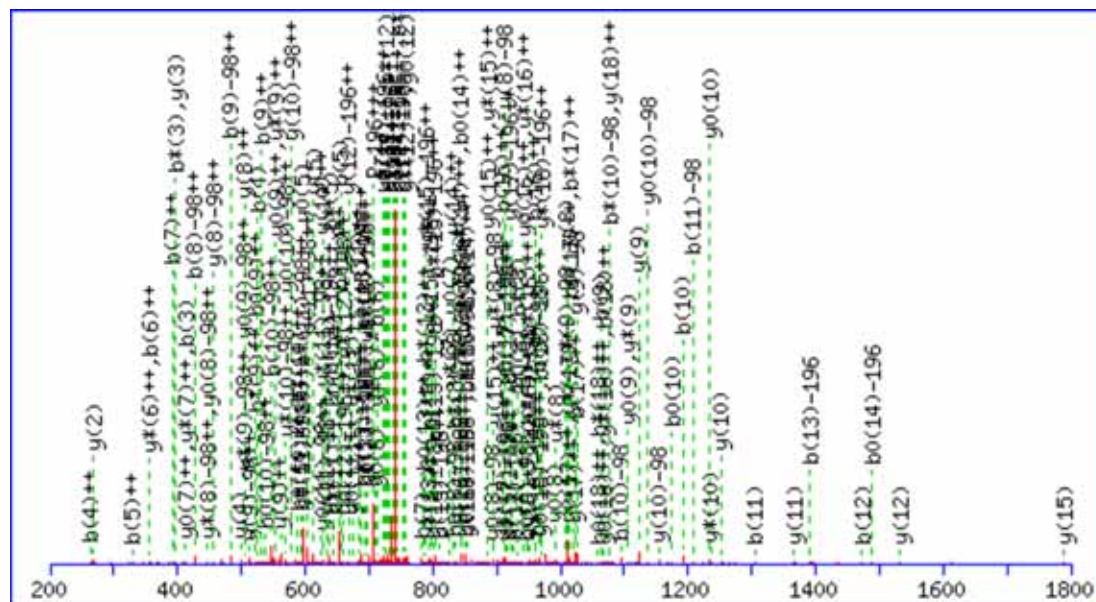

**Monoisotopic mass of neutral peptide Mr(calc):** 2314.0291

**Fixed modifications:** Carbamidomethyl (C) (apply to specified residues or termini only)

**Variable modifications:**

**N-term :** Dimethyl:2H(4)13C(2) (N-term)

**S8 :** Phospho (ST), with neutral losses 0.0000(shown in table), 97.9769

**S12 :** Phospho (ST), with neutral losses 0.0000(shown in table), 97.9769

**K19 :** Dimethyl:2H(4)13C(2) (K)

**Ions Score:** 54 **Expect:** 0.00029

**Matched b ions:** b(3), b(4)++, b(4), b(5)++, b(5), b(6)++, b(6), b(7)++, b(7), b(8)-98++, b(8)-98, b(9)-98++, b(9)-98, b(9)++, b(9), b(10)-98++, b(10)++, b(10), b(10)-98, b(11), b(11)++, b(11)-98++, b(11)-98, b(12), b(12)-98++, b(12)-196++, b(12)++, b(13)++, b(13)-196, b(13)-196++, b(13)-98++, b(14)++, b(14)-98++, b(14)-196++, b(15)++, b(15)-98++, b(15)-196++, b(16)++, b(16)-98++, b(17)++, b(17)-98++, b(17)-196++, b(18)++, b(18)-196++, b(18)-98++

**Matched y ions:** y(2), y(3), y(4), y(5), y(6), y(7), y(8), y(8)-98, y(8)-98++, y(8)++, y(9), y(9)++, y(9)-98, y(9)-98++, y(10)-98, y(10), y(10)++, y(10)-98++, y(11), y(11)-98++, y(11)++, y(12), y(12)-98, y(12)-196++, y(12)-98++, y(13)-98++, y(13)++, y(14)-98++, y(14)-196++, y(14)++, y(15), y(15)++, y(15)-196++, y(15)-98++, y(16)++, y(16)-196++, y(16)-98++, y(17)-196++, y(17)-98++, y(17)++, y(18)++

**Precursor origin neutral loss:** +

## Peptide No.664

**QLSSGVSEIR**

**Confirmed sites:** @S:3

**Ambiguous sites:**

**MS/MS Fragmentation of QLSSGVSEIR**

Found in **HSPB1\_MOUSE**, Heat shock protein beta-1 OS=Mus musculus GN=Hspb1 PE=1 SV=3

Match to Query 1153: 1182.564692 from(592.289622,2+)

Title: Elution from: 34.335 to 34.335 scan no 2897 cid35.00 polarity:+:MA10



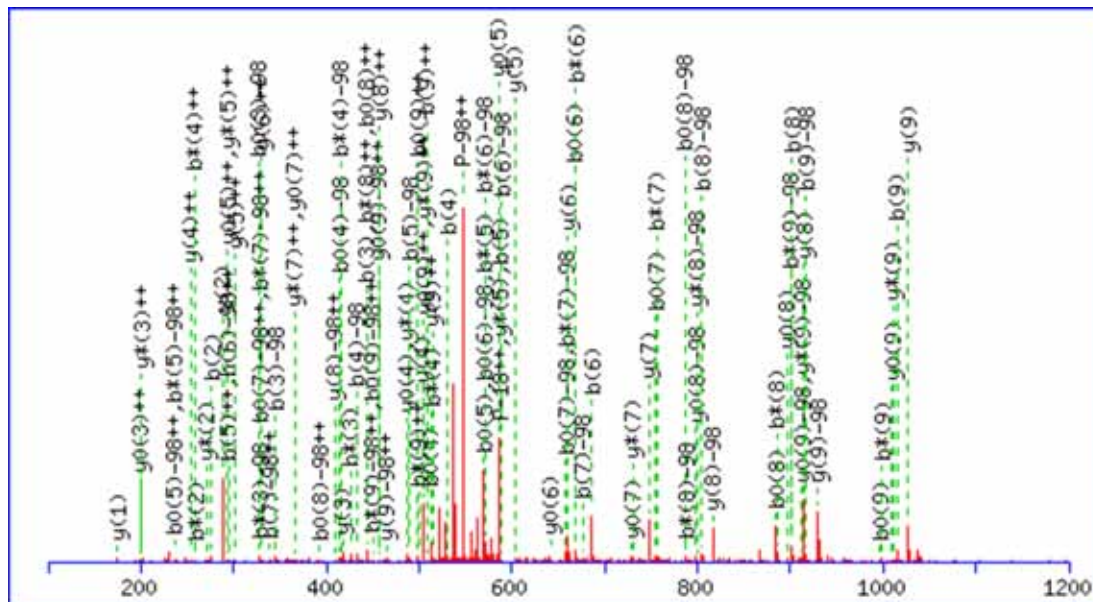

**Monoisotopic mass of neutral peptide Mr(calc):** 1188.5964

**Fixed modifications:** Carbamidomethyl (C) (apply to specified residues or termini only)

**Variable modifications:**

**N-term :** Dimethyl:2H(4)13C(2) (N-term)

**S3 :** Phospho (ST), with neutral losses 97.9769(shown in table), 0.0000

**Ions Score:** 49 **Expect:** 0.00041

**Matched b ions:** b(2), b(3), b(3)-98, b(4)-98, b(4), b(5), b(5)++, b(5)-98, b(6), b(6)-98++, b(6)-98, b(7)-98++, b(7)-98, b(8)-98, b(8), b(9), b(9)++, b(9)-98

**Matched y ions:** y(1), y(2), y(3), y(4), y(4)++, y(5)++, y(5), y(6), y(6)++, y(7), y(8)-98, y(8), y(8)-98++, y(8)++, y(9), y(9)-98, y(9)-98++, y(9)++

**Precursor origin neutral loss:** +

## Peptide No.666

**QLSVPASDEEDEVPAPIPR**

**Confirmed sites:** @S:7

**Ambiguous sites:**

MS/MS Fragmentation of **QLSVPASDEEDEVPAPIPR**

Found in **ABCF1\_MOUSE**, ATP-binding cassette sub-family F member 1 OS=Mus musculus  
GN=Abcf1 PE=1 SV=1

Match to Query 6310: 2156.005366 from(1079.009959,2+)

Title: Elution from: 50.216 to 50.216 scan no 4943 cid35.00 polarity:+:MA10:m1s

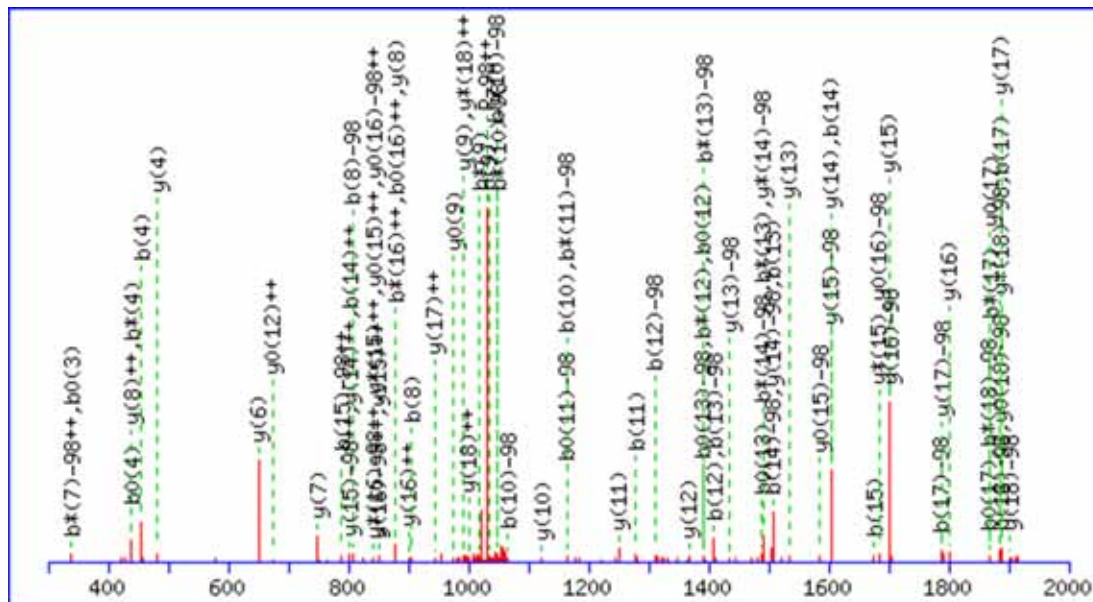

**Monoisotopic mass of neutral peptide Mr(calc):** 2156.0038

**Fixed modifications:** Carbamidomethyl (C) (apply to specified residues or termini only)

**Variable modifications:**

**N-term :** Dimethyl (N-term)

**S7 :** Phospho (ST), with neutral losses 97.9769(shown in table), 0.0000

**Ions Score:** 64 **Expect:** 3.1e-005

**Matched b ions:** b(4), b(8)-98, b(8), b(9), b(10), b(10)-98, b(11), b(12), b(12)-98, b(13)-98, b(13), b(14)-98, b(14)++, b(14), b(15)-98++, b(15), b(17), b(17)-98, b(18)-98

**Matched y ions:** y(4), y(6), y(7), y(8), y(8)++, y(9), y(10), y(11), y(12), y(13), y(13)-98, y(14)-98, y(14)++, y(14), y(15)-98, y(15), y(15)-98++, y(15)++, y(16)-98, y(16), y(16)-98++, y(16)++, y(17)-98, y(17), y(17)++, y(18)++, y(18)-98

**Precursor origin neutral loss:** +

## Peptide No.667

**QLSVPASDEEDEVPAPIPR**

**Confirmed sites:** @S:7

**Ambiguous sites:**

**MS/MS Fragmentation of** **QLSVPASDEEDEVPAPIPR**

Found in **ABCF1\_MOUSE**, ATP-binding cassette sub-family F member 1 OS=Mus musculus  
GN=Abcf1 PE=1 SV=1

Match to Query 5577: 2162.034694 from(1082.024623,2+)

Title: Elution from: 50.322 to 50.322 scan no 4722 cid35.00 polarity:+:MA10:m1s



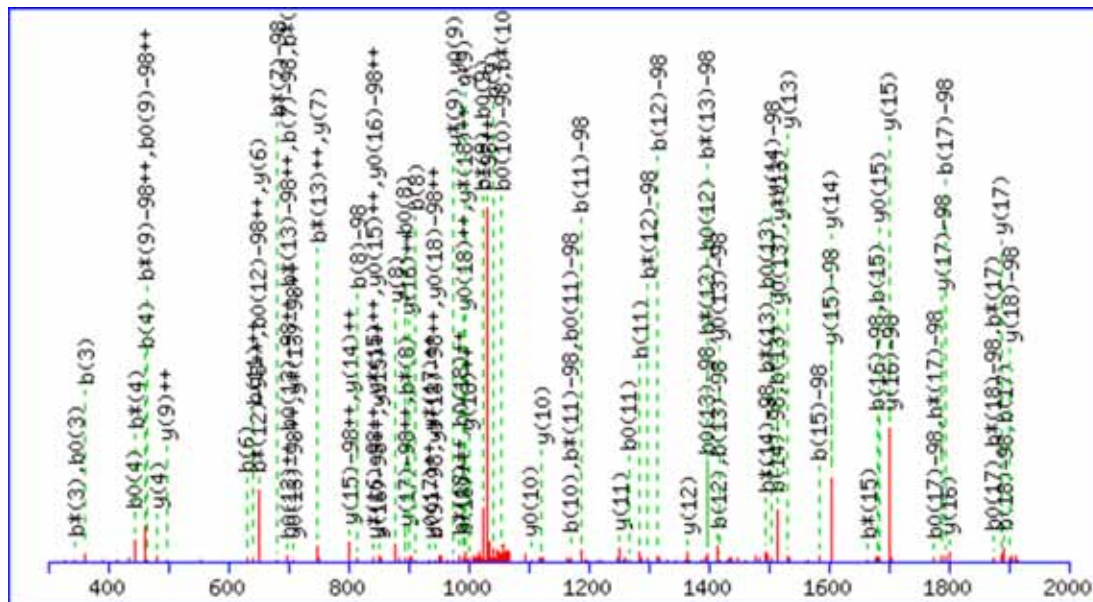

**Monoisotopic mass of neutral peptide Mr(calc):** 2162.0356

**Fixed modifications:** Carbamidomethyl (C) (apply to specified residues or termini only)

**Variable modifications:**

**N-term :** Dimethyl:2H(4)13C(2) (N-term)

**S7 :** Phospho (ST), with neutral losses 97.9769(shown in table), 0.0000

**Ions Score:** 82 **Expect:** 4.9e-007

**Matched b ions:** b(3), b(4), b(6), b(7)-98, b(8)-98, b(8), b(9)-98, b(9), b(10), b(11)-98, b(11), b(11)++, b(12), b(12)-98, b(13)-98, b(13), b(14)-98, b(15), b(15)-98, b(16)-98, b(17), b(17)-98, b(18)-98, b(18)++

**Matched y ions:** y(4), y(6), y(7), y(8), y(9)++, y(9), y(10), y(11), y(12), y(13), y(14)++, y(14), y(14)-98, y(15)-98++, y(15)-98, y(15), y(15)++, y(16), y(16)-98, y(16)-98++, y(16)++, y(17)-98, y(17), y(17)-98++, y(18)-98, y(18)++

**Precursor origin neutral loss:** +

## Peptide No.668

**QPLLLSEDEEDTK**

**Confirmed sites:** @S:6

**Ambiguous sites:**

**MS/MS Fragmentation of QPLLLSEDEEDTK**

Found in **EIF3C\_MOUSE**, Eukaryotic translation initiation factor 3 subunit C OS=Mus musculus  
GN=Eif3c PE=1 SV=1

Match to Query 3431: 1651.757164 from(826.885858,2+)

Title: Elution from: 42.947 to 42.947 scan no 4051 cid35.00 polarity:+:MA10



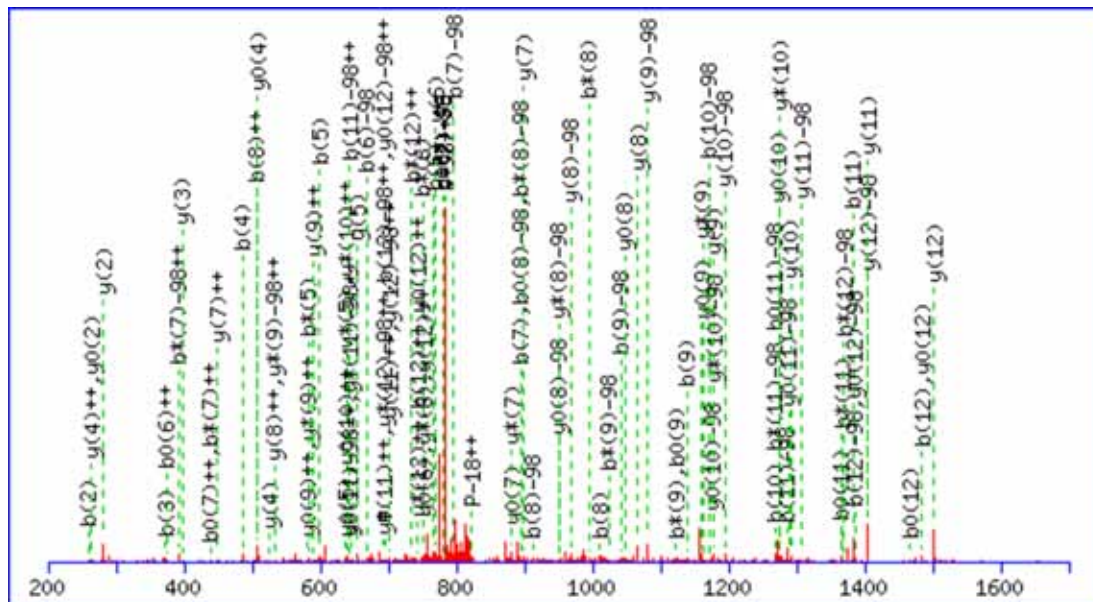

**Monoisotopic mass of neutral peptide Mr(calc):** 1663.8230

**Fixed modifications:** Carbamidomethyl (C) (apply to specified residues or termini only)

**Variable modifications:**

**N-term :** Dimethyl:2H(4)13C(2) (N-term)

**S6 :** Phospho (ST), with neutral losses 0.0000(shown in table), 97.9769

**K13 :** Dimethyl:2H(4)13C(2) (K)

**Ions Score:** 34 **Expect:** 0.02

**Matched b ions:** b(2), b(3), b(4), b(5), b(6)-98, b(6), b(7)-98, b(7), b(8)++, b(8), b(8)-98, b(9), b(9)-98, b(10), b(10)-98, b(11)-98, b(11), b(11)-98++, b(12), b(12)-98, b(12)-98++, b(12)++

**Matched y ions:** y(2), y(3), y(4)++, y(4), y(5), y(6), y(7), y(7)++, y(8)-98, y(8), y(8)++, y(9)-98, y(9), y(9)++, y(10)-98, y(10), y(11), y(11)++, y(11)-98, y(12)-98, y(12), y(12)++, y(12)-98++

**Precursor origin neutral loss:** +

## Peptide No.670

**QPSEEEIHK**

**Confirmed sites:** @S:3

**Ambiguous sites:**

**MS/MS Fragmentation of QPSEEEIHK**

Found in **PEA15\_MOUSE**, Astrocytic phosphoprotein PEA-15 OS=Mus musculus GN=Pea15 PE=1 SV=1

Match to Query 1218: 1207.574476 from(604.794514,2+)

Title: Elution from: 33.185 to 33.185 scan no 2739 cid35.00 polarity:+:MA10

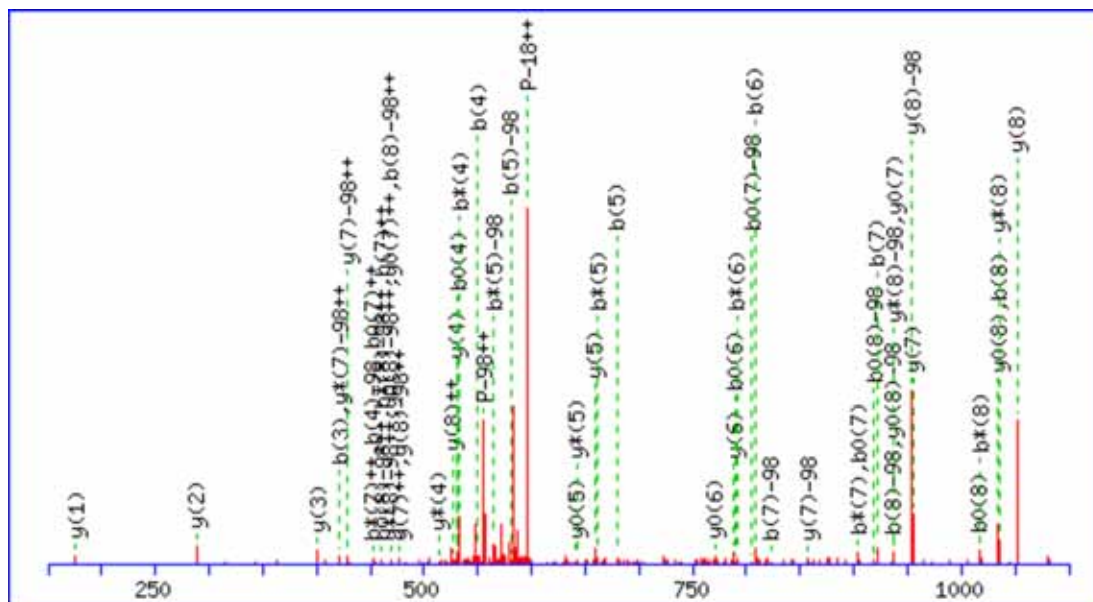

**Monoisotopic mass of neutral peptide Mr(calc): 1207.5737**

**Fixed modifications:** Carbamidomethyl (C) (apply to specified residues or termini only)

**Variable modifications:**

**N-term :** Dimethyl (N-term)

**S3 :** Phospho (ST), with neutral losses 0.0000(shown in table), 97.9769

**K9 :** Dimethyl (K)

**Ions Score:** 38 **Expect:** 0.0052

**Matched b ions:** b(3), b(4)-98, b(4), b(5), b(5)-98, b(6), b(7), b(7)++, b(7)-98, b(8), b(8)-98, b(8)-98++

**Matched y ions:** y(1), y(2), y(3), y(4), y(5), y(6), y(7), y(7)-98, y(7)-98++, y(7)++, y(8)-98, y(8), y(8)-98++, y(8)++

**Precursor origin neutral loss:** +

## Peptide No.671

**QQUESTKAAPLTYIK**

**Confirmed sites:** @S:4

**Ambiguous sites:**

MS/MS Fragmentation of **QQUESTKAAPLTYIK**

Found in **NCOR1\_MOUSE**, Nuclear receptor corepressor 1 OS=Mus musculus GN=Ncor1 PE=1 SV=1

Match to Query 3260: 1712.879960 from(429.227266,4+)

Title: Elution from: 29.189 to 29.189 scan no 2033 cid35.00 polarity:+:MA10:m1s



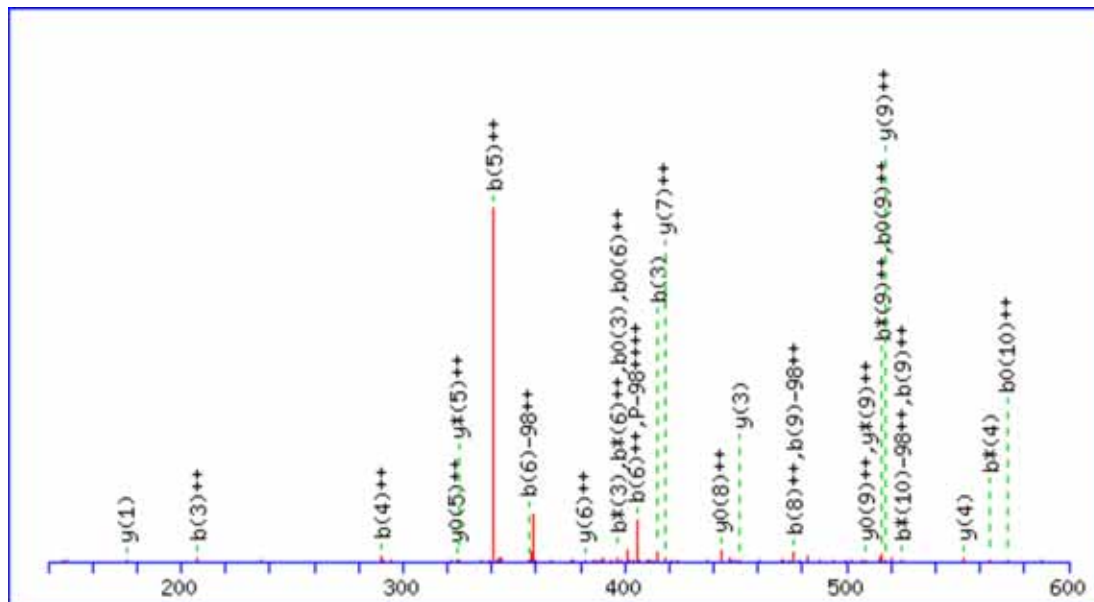

**Monoisotopic mass of neutral peptide Mr(calc):** 1712.8750

**Fixed modifications:** Carbamidomethyl (C) (apply to specified residues or termini only)

**Variable modifications:**

**N-term :** Dimethyl (N-term)

**S4 :** Phospho (ST), with neutral losses 0.0000(shown in table), 97.9769

**K14 :** Dimethyl (K)

**Ions Score:** 34 **Expect:** 0.023

**Matched b ions:** b(3)++, b(3), b(4)++, b(5)++, b(6)++, b(6)-98++, b(8)++, b(9)-98++, b(9)++

**Matched y ions:** y(1), y(3), y(4), y(6)++, y(7)++, y(9)++

**Precursor origin neutral loss:** +

## Peptide No.672

**QQSPSPIRHSPSPVR**

**Confirmed sites:** @S:10

**Ambiguous sites:**

**MS/MS Fragmentation of QQSPSPIRHSPSPVR**

Found in **TITIN\_MOUSE**, Titin OS=Mus musculus GN=Ttn PE=1 SV=1

Match to Query 4190: 1779.878817 from(594.300215,3+)

Title: Elution from: 22.509 to 22.509 scan no 1299 cid35.00 polarity:+:MA10

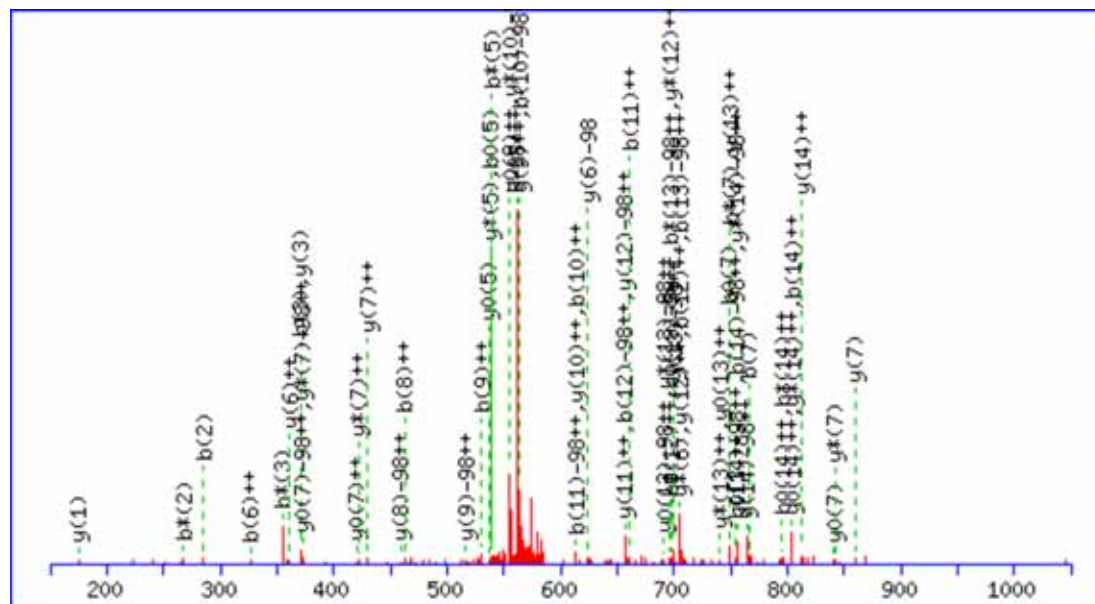

**Monoisotopic mass of neutral peptide Mr(calc):** 1779.8781

**Fixed modifications:** Carbamidomethyl (C) (apply to specified residues or termini only)

**Variable modifications:**

**N-term :** Dimethyl (N-term)

**S10 :** Phospho (ST), with neutral losses 97.9769(shown in table), 0.0000

**Ions Score:** 38 **Expect:** 0.0084

**Matched b ions:** b(2), b(3), b(5), b(6)++, b(7), b(8)++, b(9)++, b(10)-98++, b(10)++, b(11)-98++, b(11)++, b(12)++, b(12)-98++, b(13)-98++, b(13)++, b(14)++, b(14)-98++

**Matched y ions:** y(1), y(3), y(5), y(6)++, y(6)-98, y(7)++, y(7), y(8)-98++, y(9)++, y(9)-98++, y(10)-98++, y(10)++, y(11)++, y(12)++, y(12)-98++, y(13)++, y(13)-98++, y(14)-98++, y(14)++

**Precursor origin neutral loss:** +

## Peptide No.673

**QQSPSPIRHSPSPVR**

**Confirmed sites:** @S:10,@S:12

**Ambiguous sites:**

**MS/MS Fragmentation of QQSPSPIRHSPSPVR**

Found in **TITIN\_MOUSE**, Titin OS=Mus musculus GN=Ttn PE=1 SV=1

Match to Query 4744: 1859.844742 from(930.929647,2+)

Title: Elution from: 23.381 to 23.381 scan no 1415 cid35.00 polarity:+:MA10

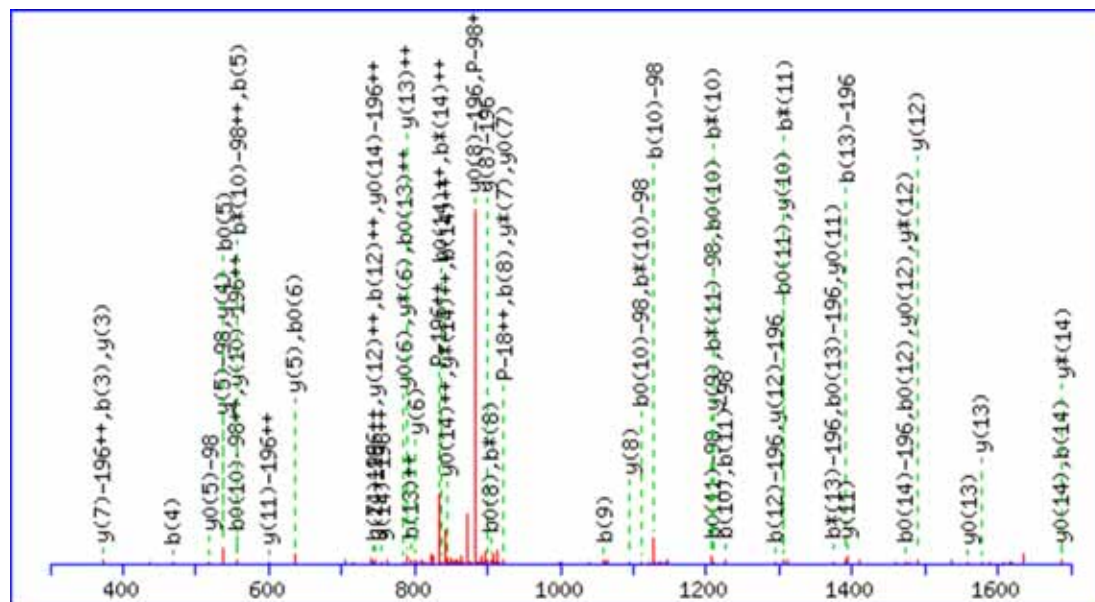

**Monoisotopic mass of neutral peptide Mr(calc):** 1859.8444

**Fixed modifications:** Carbamidomethyl (C) (apply to specified residues or termini only)

**Variable modifications:**

**N-term :** Dimethyl (N-term)

**S10 :** Phospho (ST), with neutral losses 0.0000(shown in table), 97.9769

**S12 :** Phospho (ST), with neutral losses 0.0000(shown in table), 97.9769

**Ions Score:** 37 **Expect:** 0.009

**Matched b ions:** b(3), b(4), b(5), b(8), b(9), b(10)-98, b(10), b(11)-98, b(12)-98, b(12)++, b(12)-196, b(13)-98, b(13)-196, b(13)-98++, b(13)++, b(14)-98, b(14), b(14)-196++, b(14)++, b(14)-98++

**Matched y ions:** y(3), y(4), y(5)-98, y(5), y(6)-98, y(6), y(7)-196++, y(7)-98, y(7)-196, y(8)-98, y(8)-196, y(8), y(9), y(9)-98++, y(9)-98, y(10), y(10)-196++, y(10)-98, y(11), y(11)-196++, y(11)-98, y(12), y(12)-98, y(12)++, y(12)-196, y(13)-98++, y(13)++, y(13), y(14)-196++, y(14)-98, y(14)-98++

**Precursor origin neutral loss:** +

## Peptide No.674

**QQSPSPIRHSPSPVR**

**Confirmed sites:** @S:3,@S:10,@S:12

**Ambiguous sites:**

**MS/MS Fragmentation of QQSPSPIRHSPSPVR**

Found in **TITIN\_MOUSE**, Titin OS=Mus musculus GN=Ttn PE=1 SV=1

Match to Query 4505: 1939.813308 from(970.913930,2+)

Title: Elution from: 25.127 to 25.127 scan no 1494 cid35.00 polarity:+:MA10:m1s

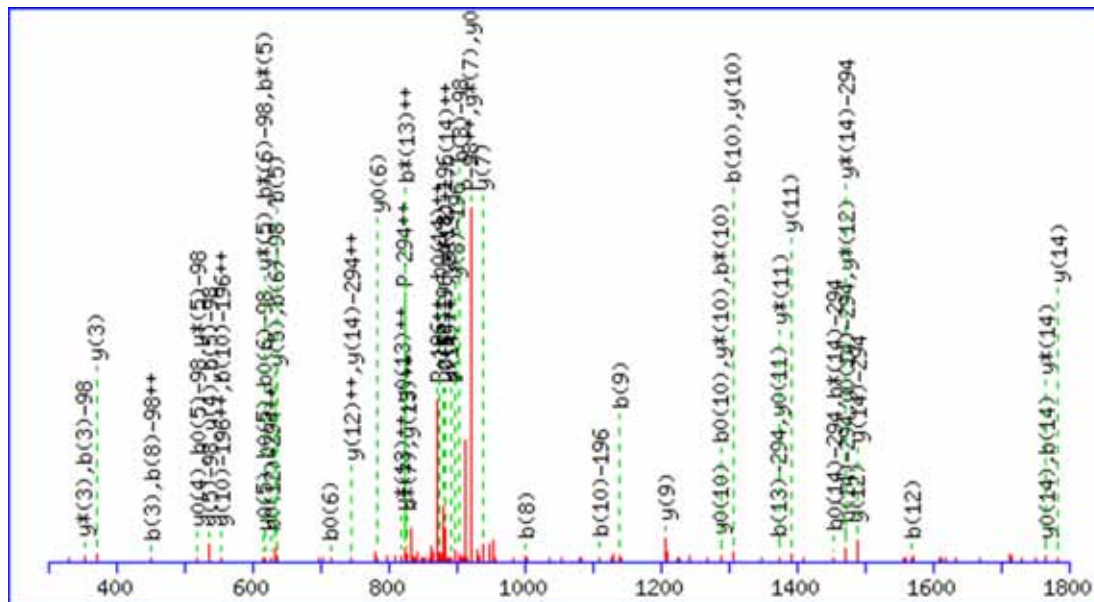

**Monoisotopic mass of neutral peptide Mr(calc):** 1939.8108

**Fixed modifications:** Carbamidomethyl (C) (apply to specified residues or termini only)

**Variable modifications:**

**N-term :** Dimethyl (N-term)

**S3 :** Phospho (ST), with neutral losses 0.0000(shown in table), 97.9769

**S10 :** Phospho (ST), with neutral losses 0.0000(shown in table), 97.9769

**S12 :** Phospho (ST), with neutral losses 0.0000(shown in table), 97.9769

**Ions Score:** 50 **Expect:** 0.00039

**Matched b ions:** b(3)-98, b(3), b(5)-98, b(5), b(6)-98, b(8)-98++, b(8), b(8)-98, b(9), b(10)-98, b(10), b(10)-196++, b(10)-196, b(11)-98, b(12)-98, b(12)-196, b(12), b(13)-294, b(14)-196, b(14), b(14)-294, b(14)-98, b(14)-98++, b(14)++

**Matched y ions:** y(3), y(4), y(5)-98, y(5), y(6)-98++, y(7), y(7)-98, y(8)-196, y(9), y(9)-98++, y(9)-98, y(10), y(10)-196++, y(11), y(12), y(12)-98, y(12)++, y(13)-98++, y(13)++, y(13)-98, y(14), y(14)-294, y(14)-294++, y(14)++

**Precursor origin neutral loss:** +

## Peptide No.675

**QQSPSPIRHSPSPVR**

**Confirmed sites:** @S:3,@S:12

**Ambiguous sites:**

**MS/MS Fragmentation of QQSPSPIRHSPSPVR**

Found in **TITIN\_MOUSE**, Titin OS=Mus musculus GN=Ttn PE=1 SV=1

Match to Query 3846: 1859.845856 from(930.930204,2+)

Title: Elution from: 23.473 to 23.473 scan no 1281 cid35.00 polarity:+:MA10:m1s



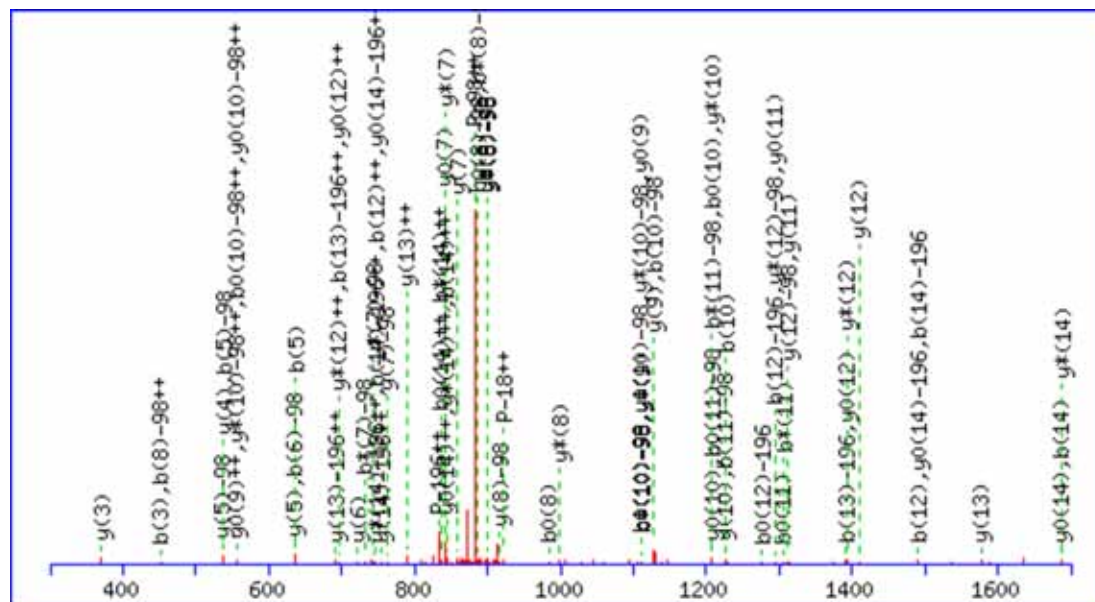

**Monoisotopic mass of neutral peptide Mr(calc):** 1859.8444

**Fixed modifications:** Carbamidomethyl (C) (apply to specified residues or termini only)

**Variable modifications:**

**N-term :** Dimethyl (N-term)

**S3 :** Phospho (ST), with neutral losses 0.0000(shown in table), 97.9769

**S12 :** Phospho (ST), with neutral losses 0.0000(shown in table), 97.9769

**Ions Score:** 43 **Expect:** 0.0026

**Matched b ions:** b(3), b(5), b(5)-98, b(6)-98, b(8)-98++, b(10)-98, b(10), b(11)-98, b(12)-98, b(12), b(12)-196, b(12)++, b(12)-98++, b(13)-98, b(13)-196, b(13)-196++, b(14)-196, b(14), b(14)-196++, b(14)++

**Matched y ions:** y(3), y(4), y(5)-98, y(5), y(6), y(7), y(7)-98, y(8)-98, y(9), y(10), y(11), y(12)-98, y(12), y(13)-98++, y(13)-196++, y(13), y(13)++, y(14)-196++

**Precursor origin neutral loss:** +

## Peptide No.676

**QQSPSPIRHSPSPVR**

**Confirmed sites:** @S:3,@S:5,@S:10,@S:12

**Ambiguous sites:**

**MS/MS Fragmentation of QQSPSPIRHSPSPVR**

Found in **TITIN\_MOUSE**, Titin OS=Mus musculus GN=Ttn PE=1 SV=1

Match to Query 4632: 2019.778530 from(1010.896541,2+)

Title: Elution from: 25.972 to 25.972 scan no 1621 cid35.00 polarity:+:MA10:m1s

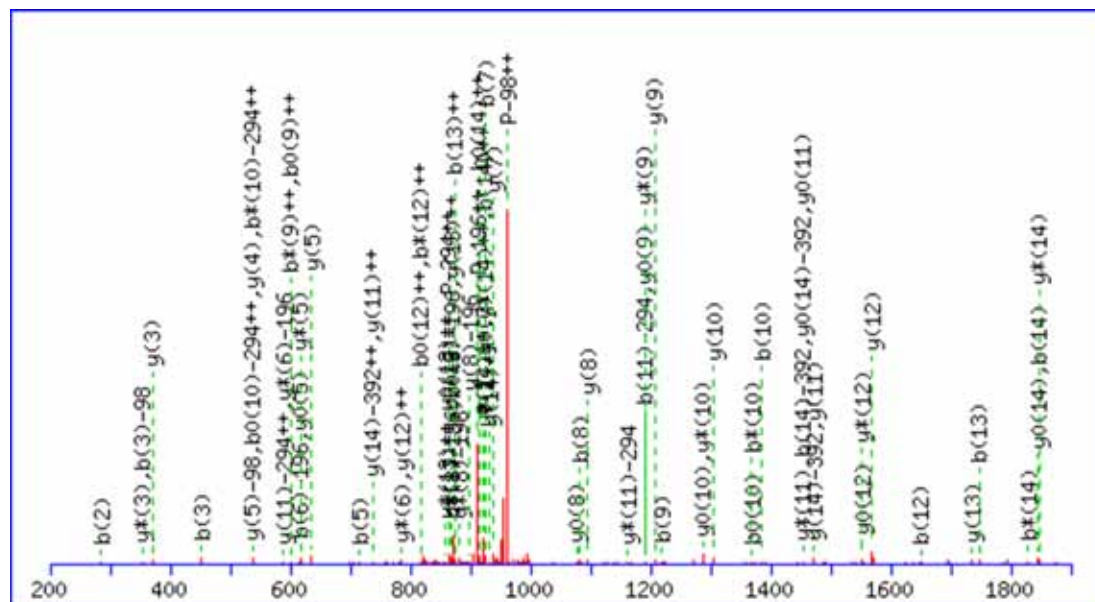

**Monoisotopic mass of neutral peptide Mr(calc):** 2019.7771

**Fixed modifications:** Carbamidomethyl (C) (apply to specified residues or termini only)

**Variable modifications:**

**N-term :** Dimethyl (N-term)

**S3 :** Phospho (ST), with neutral losses 0.0000(shown in table), 97.9769

**S5 :** Phospho (ST), with neutral losses 0.0000(shown in table), 97.9769

**S10 :** Phospho (ST), with neutral losses 0.0000(shown in table), 97.9769

**S12 :** Phospho (ST), with neutral losses 0.0000(shown in table), 97.9769

**Ions Score:** 51 **Expect:** 0.00018

**Matched b ions:** b(2), b(3), b(3)-98, b(5)-98, b(5), b(6)-98, b(6)-196, b(7)-98, b(7), b(8), b(8)-98, b(9), b(9)-98, b(10)-98, b(10)-196, b(10), b(11)-196, b(11)-294, b(11)-98, b(12), b(12)-196, b(12)-98, b(13)-98, b(13)-196, b(13), b(13)++, b(14), b(14)-196, b(14)-98, b(14)-392, b(14)-294, b(14)-98++, b(14)++, b(14)-196++

**Matched y ions:** y(3), y(4), y(5)-98, y(5), y(6)-98, y(7), y(7)-98, y(8), y(8)-98, y(8)-196, y(9), y(10)-98, y(10), y(11), y(11)-294++, y(11)++, y(11)-98, y(12), y(12)-98, y(12)++, y(12)-98++, y(13)-98, y(13), y(13)-98++, y(13)-196++, y(13)++, y(13)-196, y(14)-392, y(14)-294, y(14)-294++, y(14)-392++, y(14)-196++, y(14)-98++, y(14)++

**Precursor origin neutral loss:** +

## Peptide No.677

**QQSPSPIRHSPSPVR**

**Confirmed sites:** @S:5,@S:10

**Ambiguous sites:**

MS/MS Fragmentation of **QQSPSPIRHSPSPVR**

Found in **TITIN\_MOUSE**, Titin OS=Mus musculus GN=Ttn PE=1 SV=1

Match to Query 4740: 1859.843544 from(465.968162,4+)

Title: Elution from: 23.456 to 23.456 scan no 1425 cid35.00 polarity:+:MA10

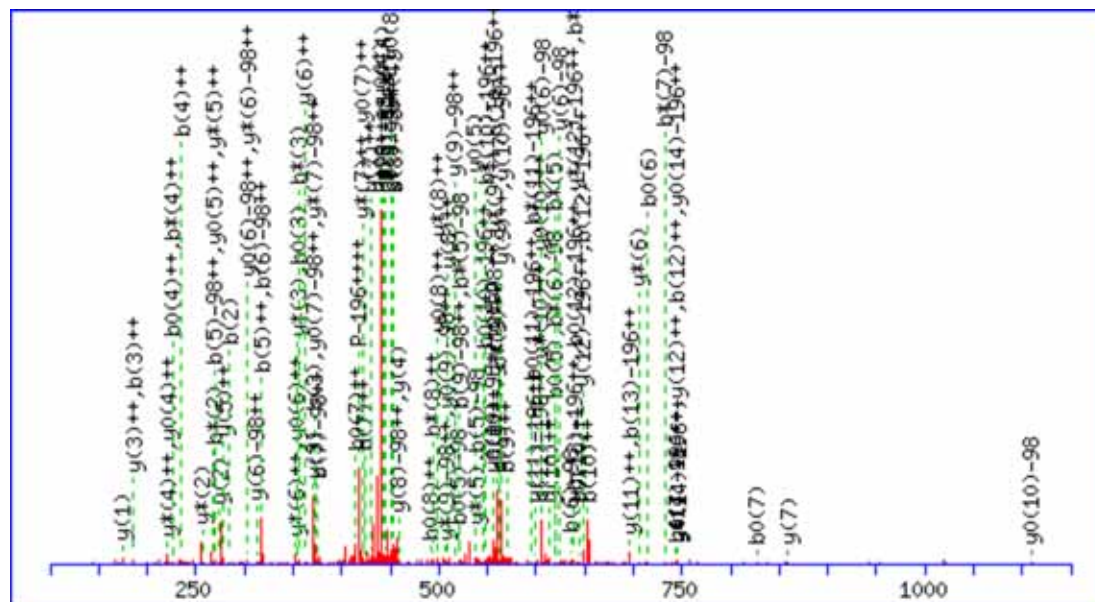

**Monoisotopic mass of neutral peptide Mr(calc):** 1859.8444

**Fixed modifications:** Carbamidomethyl (C) (apply to specified residues or termini only)

**Variable modifications:**

**N-term :** Dimethyl (N-term)

**S5 :** Phospho (ST), with neutral losses 97.9769(shown in table), 0.0000

**S10 :** Phospho (ST), with neutral losses 97.9769(shown in table), 0.0000

**Ions Score:** 33 **Expect:** 0.024

**Matched b ions:** b(2), b(3)++, b(3), b(4)++, b(5)++, b(5)-98++, b(5)-98, b(6)-98++, b(6)-98, b(7)-98++, b(7)++, b(8)-98++, b(9)-98++, b(9)++, b(10)++, b(10)-98++, b(10)-196++, b(11)-98++, b(11)-196++, b(12)++, b(12)-196++, b(12)-98++, b(13)-98++, b(13)-196++, b(14)-196++

**Matched y ions:** y(1), y(2), y(3), y(3)++, y(4), y(5)++, y(5), y(6)-98++, y(6)++, y(6)-98, y(7), y(7)++, y(8)-98++, y(8)++, y(9)++, y(9)-98++, y(10)-98++, y(10)++, y(11)-98++, y(11)++, y(11)-196++, y(12)++, y(12)-196++, y(12)-98++, y(13)-98++

**Precursor origin neutral loss:** +

## Peptide No.678

**QQSPSPIRHSPSPVR**

**Confirmed sites:** @S:5,@S:10,@S:12

**Ambiguous sites:**

MS/MS Fragmentation of **QQSPSPIRHSPSPVR**

Found in **TITIN\_MOUSE**, Titin OS=Mus musculus GN=Ttn PE=1 SV=1

Match to Query 5331: 1939.811784 from(970.913168,2+)

Title: Elution from: 24.872 to 24.872 scan no 1614 cid35.00 polarity:+:MA10





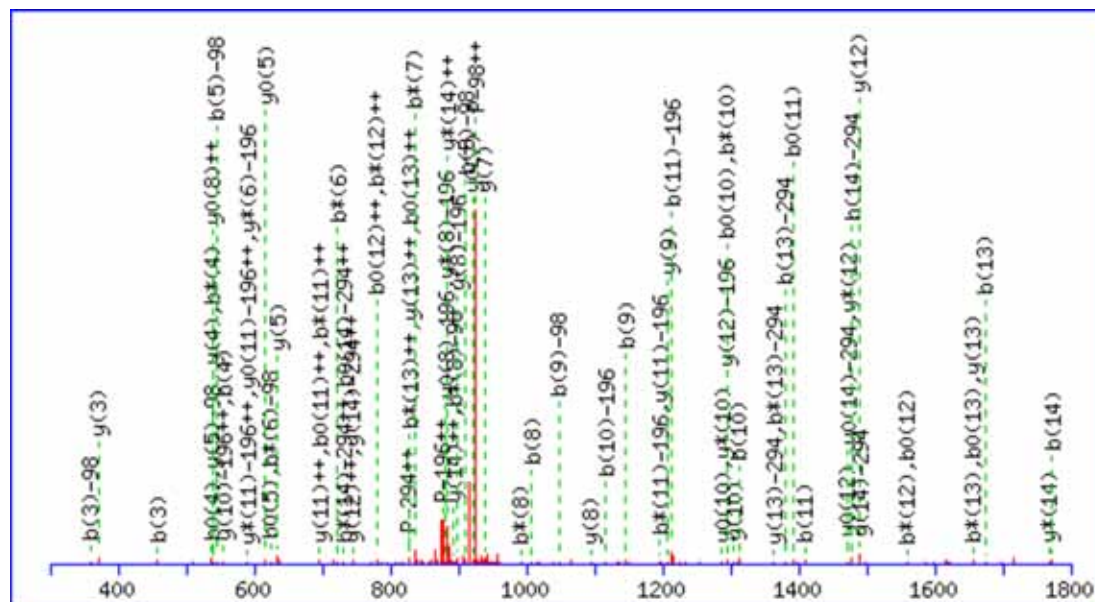

**Monoisotopic mass of neutral peptide Mr(calc):** 1945.8426

**Fixed modifications:** Carbamidomethyl (C) (apply to specified residues or termini only)

**Variable modifications:**

**N-term :** Dimethyl:2H(4)13C(2) (N-term)

**S3 :** Phospho (ST), with neutral losses 0.0000(shown in table), 97.9769

**S10 :** Phospho (ST), with neutral losses 0.0000(shown in table), 97.9769

**S12 :** Phospho (ST), with neutral losses 0.0000(shown in table), 97.9769

**Ions Score:** 32 **Expect:** 0.02

**Matched b ions:** b(3), b(3)-98, b(4), b(5)-98, b(8), b(8)-98, b(9)-98, b(9), b(10)-98, b(10), b(10)-196, b(11)-98, b(11), b(11)-196, b(12)-98, b(12)-196, b(13)-196, b(13), b(13)-294, b(14), b(14)-294, b(14)-98

**Matched y ions:** y(3), y(4), y(5)-98, y(5), y(7), y(8), y(8)-196, y(9)-98, y(9), y(10)-196, y(10), y(11), y(11)-98, y(11)-196, y(12), y(12)-98, y(12)-98, y(12)-98, y(12)-196, y(13), y(13), y(13)+, y(13)-196, y(13)-98, y(13)-98, y(13)-294, y(14)-294, y(14)-196, y(14)-196, y(14)+, y(14)+

**Precursor origin neutral loss:** +

## Peptide No.680

**QQSPSPIRHSPSPVR**

**Confirmed sites:** @S:3,@S:5,@S:10,@S:12

**Ambiguous sites:**

MS/MS Fragmentation of **QQSPSPIRHSPSPVR**

Found in **TITIN\_MOUSE**, Titin OS=Mus musculus GN=Ttn PE=1 SV=1

Match to Query 4918: 2025.810410 from(1013.912481,2+)

Title: Elution from: 26.012 to 26.012 scan no 1591 cid35.00 polarity:+:MA10:m1s

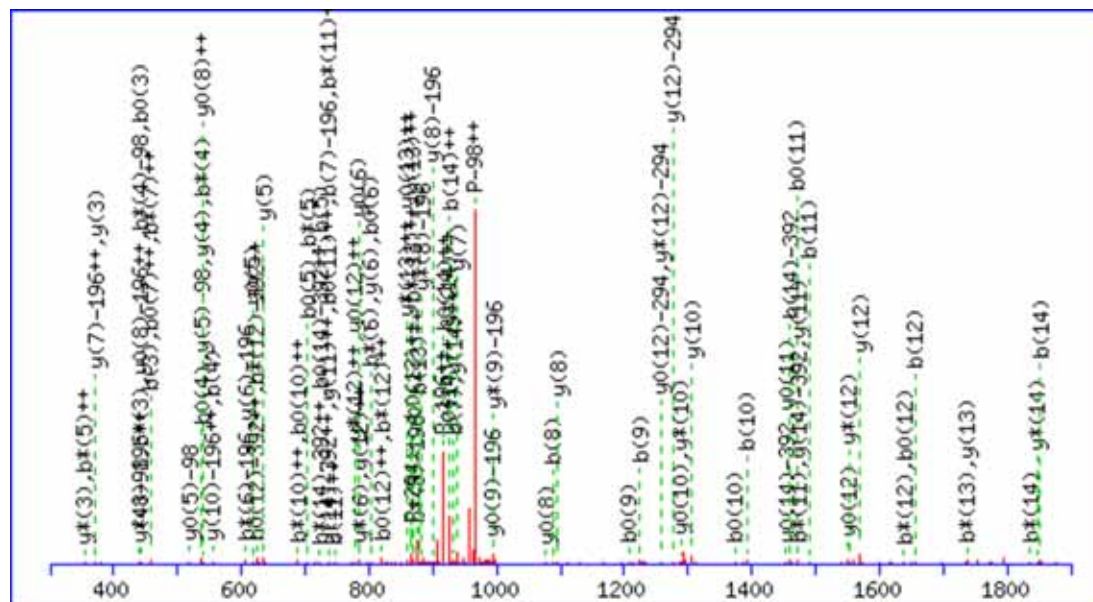

**Monoisotopic mass of neutral peptide Mr(calc):** 2025.8089

**Fixed modifications:** Carbamidomethyl (C) (apply to specified residues or termini only)

**Variable modifications:**

**N-term :** Dimethyl:2H(4)13C(2) (N-term)

**S3 :** Phospho (ST), with neutral losses 0.0000(shown in table), 97.9769

**S5 :** Phospho (ST), with neutral losses 0.0000(shown in table), 97.9769

**S10 :** Phospho (ST), with neutral losses 0.0000(shown in table), 97.9769

**S12 :** Phospho (ST), with neutral losses 0.0000(shown in table), 97.9769

**Ions Score:** 47 **Expect:** 0.00047

**Matched b ions:** b(3), b(4), b(5)-98, b(5), b(7)-196, b(7)-98, b(7), b(8), b(8)-98, b(9), b(10)-98, b(10), b(10)-196, b(11)-196, b(11)-98, b(11), b(11)++, b(12)-196, b(12)-98, b(12), b(13)-196, b(13)-98, b(13)++, b(14), b(14)-392, b(14)-294, b(14)-98, b(14)-196, b(14)-98++, b(14)++

**Matched y ions:** y(3), y(4), y(4)-98, y(5)-98, y(5), y(6)-98, y(6)-196, y(6), y(7)-196++, y(7), y(7)-98, y(8), y(8)-98, y(8)-196, y(9)-98++, y(10)-98, y(10), y(10)-196++, y(11)-98++, y(11), y(11)++, y(11)-98, y(11)-196, y(12)-196++, y(12)-98, y(12), y(12)++, y(12)-98++, y(12)-196, y(12)-294, y(13)-98++, y(13), y(13)-196++, y(13)-294++, y(13)-98, y(13)++, y(14)-294++, y(14)-392, y(14)-294, y(14)-392++, y(14)-196++, y(14)++

**Precursor origin neutral loss:** +

## Peptide No.681

**QQSPSPIRHSPSPVR**

**Confirmed sites:** @S:3,@S:5,@S:12

**Ambiguous sites:**

**MS/MS Fragmentation of QQSPSPIRHSPSPVR**

Found in **TITIN\_MOUSE**, Titin OS=Mus musculus GN=Ttn PE=1 SV=1

Match to Query 4720: 1945.844048 from(973.929300,2+)

Title: Elution from: 25.195 to 25.195 scan no 1493 cid35.00 polarity:+:MA10



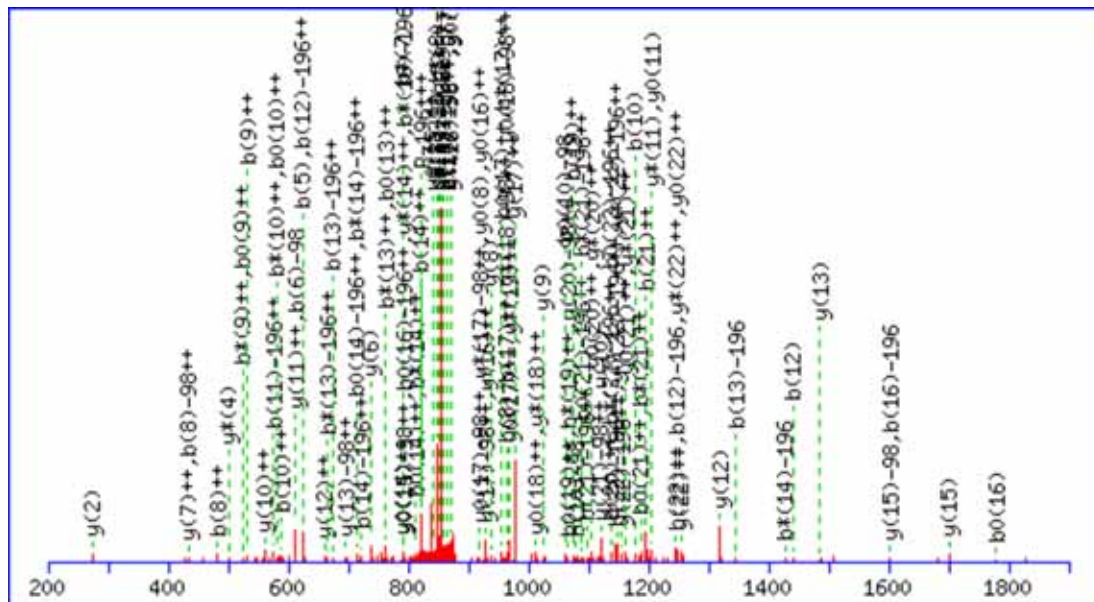

**Monoisotopic mass of neutral peptide Mr(calc):** 2662.1677

**Fixed modifications:** Carbamidomethyl (C) (apply to specified residues or termini only)

**Variable modifications:**

**N-term :** Dimethyl (N-term)

**S2 :** Phospho (ST), with neutral losses 0.0000(shown in table), 97.9769

**S11 :** Phospho (ST), with neutral losses 0.0000(shown in table), 97.9769

**Ions Score:** 47 **Expect:** 0.0017

**Matched b ions:** b(5), b(6)-98, b(8)-98++, b(8)++, b(8), b(8)-98, b(9)++, b(10)++, b(10), b(10)-98, b(11)-98++, b(11)-196++, b(11)-98, b(12), b(12)-196++, b(12)-196, b(13)-196, b(13)-98++, b(13)-196++, b(14)-196++, b(14)++, b(15)++, b(16)-196, b(16)-98, b(16)-98++, b(17)++, b(17)-196++, b(17)-98++, b(18)-98++, b(19)++, b(19)-98++, b(20)++, b(20)-98++, b(21)++, b(21)-98++, b(21)-196++, b(22)-98++, b(22)-196++, b(22)++

**Matched y ions:** y(2), y(6), y(7)++, y(7), y(8), y(9), y(10)++, y(10), y(11)++, y(12), y(12)++, y(13), y(13)-98++, y(15)-98, y(15), y(15)++, y(16)++, y(17)++, y(17)-98++, y(20)-98++, y(21)-98++, y(22)-98++, y(22)++, y(22)-196++

**Precursor origin neutral loss:** +

## Peptide No.683

**QSLGESPRTLSPTPSAEGYQDVR**

**Confirmed sites:** @S:2,@S:6,@S:11,@S:15

**Ambiguous sites:**

**MS/MS Fragmentation of QSLGESPRTLSPTPSAEGYQDVR**

Found in **ABLM1\_MOUSE**, Actin-binding LIM protein 1 OS=Mus musculus GN=Ablm1 PE=1 SV=1

Match to Query 7209: 2822.101704 from(941.707844,3+)

Title: Elution from: 48.276 to 48.276 scan no 4492 cid35.00 polarity:+:MA10:m1s





Match to Query 7095: 2742.136080 from(915.052636,3+)

Title: Elution from: 45.655 to 45.655 scan no 4207 cid35.00 polarity:+:MA10:m1s

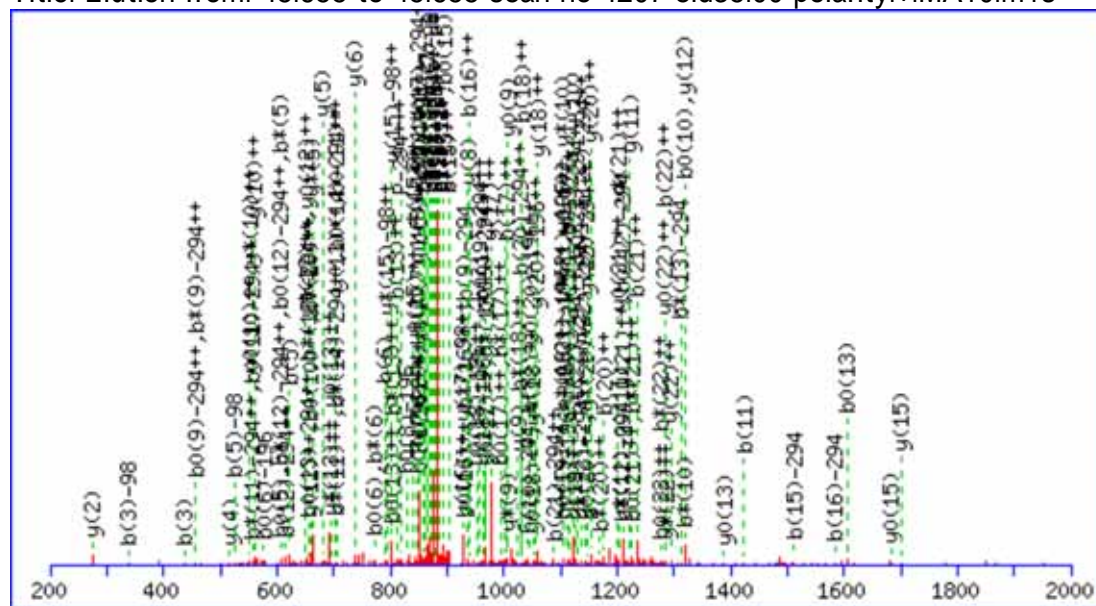

**Monoisotopic mass of neutral peptide Mr(calc):** 2742.1340

**Fixed modifications:** Carbamidomethyl (C) (apply to specified residues or termini only)

**Variable modifications:**

**N-term :** Dimethyl (N-term)

**S2 :** Phospho (ST), with neutral losses 0.0000(shown in table), 97.9769

**S6 :** Phospho (ST), with neutral losses 0.0000(shown in table), 97.9769

**T9 :** Phospho (ST), with neutral losses 0.0000(shown in table), 97.9769

**Ions Score:** 35 **Expect:** 0.021

**Matched b ions:** b(3)-98, b(3), b(5), b(5)-98, b(6)-98, b(6), b(7), b(8), b(8)-196, b(8)-98, b(9)-98++, b(9)-294, b(9)-98, b(10)-196++, b(10)-98++, b(10)-294, b(10)-98, b(11)-98++, b(11)-98, b(11)-196++, b(11), b(11)-196, b(12)-196++, b(12)-196, b(12)-294++, b(12)-98, b(13)-98++, b(13)++, b(14)-196++, b(14)-98++, b(14)++, b(15)++, b(15)-196++, b(15)-98++, b(15)-294, b(16)-196, b(16)-98, b(16)-294, b(16)-98++, b(16)-196++, b(16)++, b(17)++, b(17)-294++, b(18)-294++, b(18)++, b(19)++, b(19)-294++, b(19)-98++, b(20)++, b(20)-294++, b(20)-98++, b(21)++, b(21)-98++, b(21)-294++, b(21)-196++, b(22)-98++, b(22)-196++, b(22)++, b(22)-294++

**Matched y ions:** y(2), y(4), y(5), y(6), y(7), y(8), y(9), y(10)++, y(10), y(11), y(12), y(12)++, y(13)++, y(15), y(15)++, y(15)-98++, y(16)++, y(16)-98++, y(17)++, y(17)-98++, y(18)-98++, y(18)++, y(18)-196++, y(19)++, y(20)++, y(20)-98++, y(20)-196++, y(21)++, y(21)-98++, y(21)-196++, y(22)-196++, y(22)++, y(22)-98++, y(22)-294++

**Precursor origin neutral loss:** +

## Peptide No.685

**QSLGESPRTLSPTPSAEGYQDVR**

**Confirmed sites:** @S:2,@S:6,@T:9,@T:13

**Ambiguous sites:**

MS/MS Fragmentation of **QSLGESPRTLSPTPSAEGYQDVR**

Found in **ABLM1\_MOUSE**, Actin-binding LIM protein 1 OS=Mus musculus GN=Ablim1 PE=1 SV=1

Match to Query 8669: 2822.102814 from(941.708214,3+)

Title: Elution from: 47.876 to 47.876 scan no 4687 cid35.00 polarity:+:MA10:m1s

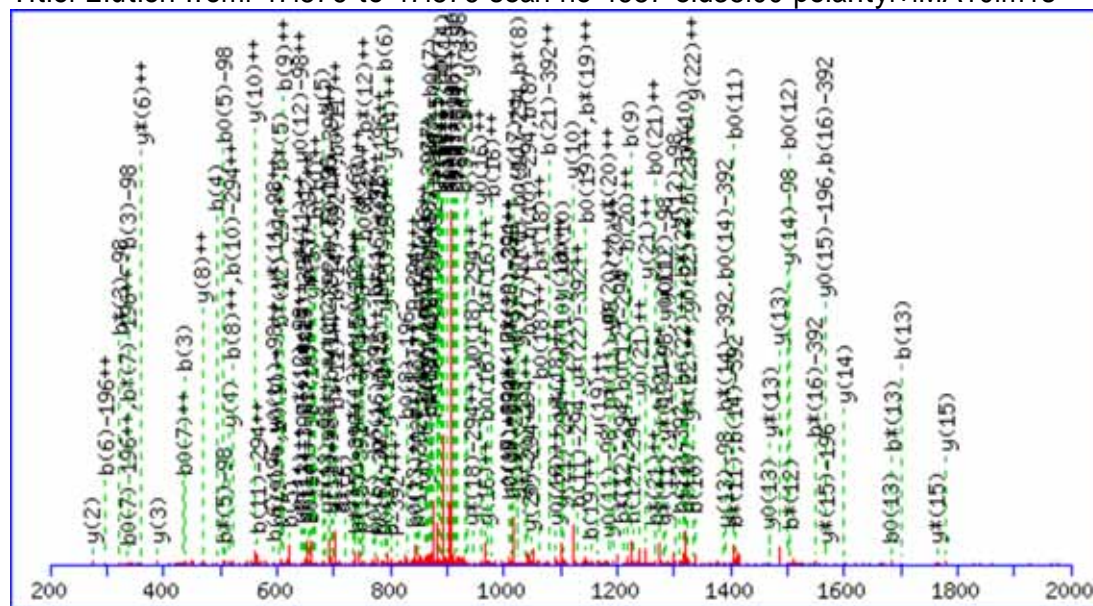

**Monoisotopic mass of neutral peptide Mr(calc):** 2822.1003

**Fixed modifications:** Carbamidomethyl (C) (apply to specified residues or termini only)

**Variable modifications:**

**N-term :** Dimethyl (N-term)

**S2 :** Phospho (ST), with neutral losses 0.0000(shown in table), 97.9769

**S6 :** Phospho (ST), with neutral losses 0.0000(shown in table), 97.9769

**T9 :** Phospho (ST), with neutral losses 0.0000(shown in table), 97.9769

**T13 :** Phospho (ST), with neutral losses 0.0000(shown in table), 97.9769

**Ions Score:** 45 **Expect:** 0.0014

**Matched b ions:** b(3), b(3)-98, b(4), b(5), b(6)-196++, b(6)-98, b(6)-196, b(6), b(7)-196, b(7)-98, b(7), b(8), b(8)-98++, b(8)++, b(8)-98, b(9)-98++, b(9)-98, b(9)-196++, b(9)++, b(9)-294, b(9)-196, b(9), b(10)-98++, b(10)-98, b(10)-196++, b(10)-294, b(10), b(10)-294++, b(10)++, b(11)-294++, b(11)-98++, b(11)-294, b(11)-98, b(12)-196++, b(12)-294, b(12)-196, b(13)-98, b(13), b(13)-294++, b(13)-392++, b(13)-196++, b(13)-98++, b(13)-392, b(13)-294, b(13)-196, b(14)-392++, b(14)-196, b(14)-392, b(14)-98, b(14)-294++, b(14)-196++, b(14)++, b(15)-98++, b(15)-392++, b(15)-294++, b(15)-196++, b(16)-98, b(16)-294, b(16)-392++, b(16)-294++, b(16)-196++, b(16)-98++, b(16)++, b(16)-392, b(17)++, b(17)-98++, b(17)-392++, b(17)-294++, b(17)-196++, b(18)-392++, b(18)-294++, b(18)-196++, b(18)-98++, b(19)-98++, b(19)-196++, b(19)++, b(20)++, b(20)-98++, b(21)-98++, b(21)++, b(21)-392++, b(21)-294++, b(21)-196++, b(22)-196++, b(22)-98++, b(22)++, b(22)-294++

**Matched y ions:** y(2), y(3), y(4), y(5), y(6), y(7), y(8)++, y(8), y(9), y(10)++, y(10), y(11)++, y(12)-98++, y(12)-98, y(12)++, y(13), y(13)++, y(13)-98++, y(13)-98, y(14), y(14)-98++, y(14)++, y(14)-98, y(15), y(15)-98, y(15)-196++, y(15)-98++, y(15)++, y(16)-196++, y(16)++, y(16)-98++, y(17)++, y(17)-98++, y(17)-196++, y(18)++, y(18)-98++, y(18)-196++, y(19)-294++, y(19)++, y(20)-98++, y(20)++, y(20)-294++, y(20)-196++, y(21)++, y(21)-294++, y(21)-98++, y(21)-196++, y(22)-294++, y(22)-196++, y(22)-98++, y(22)++

**Precursor origin neutral loss:** +

## Peptide No.686



**QSLGESPRTLSPTPSAEGYQDVR**

**Confirmed sites: @S:2,@T:9,@S:11,@T:13**

**Ambiguous sites:**

MS/MS Fragmentation of **QSLGESPRTLSPTPSAEGYQDVR**

Found in **ABLM1\_MOUSE**, Actin-binding LIM protein 1 OS=Mus musculus GN=Ablim1 PE=1 SV=1

Match to Query 7361: 2822.101743 from(941.707857,3+)

Title: Elution from: 47.423 to 47.423 scan no 4446 cid35.00 polarity:+:MA10:m1s

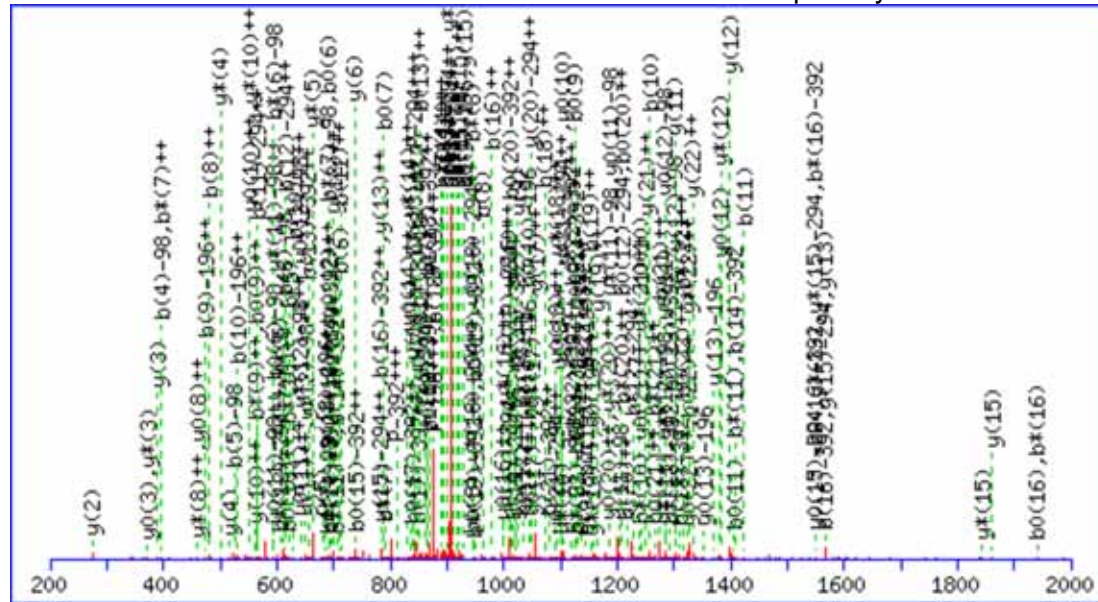

**Monoisotopic mass of neutral peptide Mr(calc): 2822.1003**

**Fixed modifications:** Carbamidomethyl (C) (apply to specified residues or termini only)

**Variable modifications:**

**N-term :** Dimethyl (N-term)

**S2 :** Phospho (ST), with neutral losses 97.9769(shown in table), 0.0000

**T9 :** Phospho (ST), with neutral losses 97.9769(shown in table), 0.0000

**S11 :** Phospho (ST), with neutral losses 97.9769(shown in table), 0.0000

**T13 :** Phospho (ST), with neutral losses 97.9769(shown in table), 0.0000

**Ions Score: 28 Expect: 0.056**

**Matched b ions:** b(4)-98, b(5)-98, b(5), b(6)-98, b(6), b(8)++, b(8), b(9)-98++, b(9)-98, b(9)-196++, b(9), b(10)-196++, b(10)-98++, b(10)-98, b(10), b(10)++, b(11)-98++, b(11)-98, b(11)-196++, b(11)-294++, b(11)-196, b(11), b(11)++, b(12)-196++, b(12)-196, b(12)-294++, b(12)-294, b(12)-98, b(12)-98++, b(13)-98++, b(13)-196++, b(13)-196, b(13)-98, b(13)-294++, b(13)-392++, b(13)-392, b(13)++, b(14)-196++, b(14)-196, b(14)-294++, b(14)-294, b(14)-392++, b(14)-392, b(14)-98++, b(14)++, b(15)-98++, b(15)-196++, b(16)-392, b(16)-196, b(16)-392++, b(16)-196++, b(16)-98, b(16)-98++, b(16)++, b(17)-98, b(17)-98++, b(17)++, b(17)-294++, b(17)-392++, b(17)-196++, b(18)-392++, b(18)-294++, b(18)-98++, b(18)++, b(19)-98++, b(19)++, b(20)-392++, b(20)-196++, b(20)-98++, b(20)++, b(21)-98++, b(21)-196++, b(21)-392++, b(21)-294++, b(22)-98++, b(22)-196++, b(22)++, b(22)-294++, b(22)-392++

**Matched y ions:** y(2), y(3), y(4), y(5), y(6), y(7), y(9), y(10)++, y(11)++, y(11), y(11)-98, y(12), y(12)++, y(12)-98++, y(12)-98, y(13), y(13)-98, y(13)++, y(13)-98++, y(13)-196++, y(13)-196, y(14)-98, y(14)++, y(14)-98++, y(15)-294, y(15), y(15)-98, y(15)-294++, y(15)-98++, y(15)-196++, y(15)++, y(16)++, y(16)-294++, y(16)-196++, y(16)-98++, y(17)++, y(17)-98++, y(17)-294++, y(17)-196++, y(18)-196++, y(18)-98++, y(18)++, y(19)-294++, y(19)++, y(20)-294++, y(20)-98++, y(21)-98++, y(21)-294++, y(21)-196++, y(21)++, y(22)-98++, y(22)++, y(22)-196++, y(22)-392++, y(22)-294++

**Precursor origin neutral loss: +**



# Peptide No.687

**QSLGESPRTLSPTPSAEGYQDVR**

Confirmed sites: @S:6,@S:11

Ambiguous sites:

MS/MS Fragmentation of **QSLGESPRTLSPTPSAEGYQDVR**

Found in **ABLM1\_MOUSE**, Actin-binding LIM protein 1 OS=Mus musculus GN=Ablim1 PE=1 SV=1

Match to Query 6783: 2662.170864 from(888.397564,3+)

Title: Elution from: 42.761 to 42.761 scan no 3811 cid35.00 polarity:+.MA10:m1s

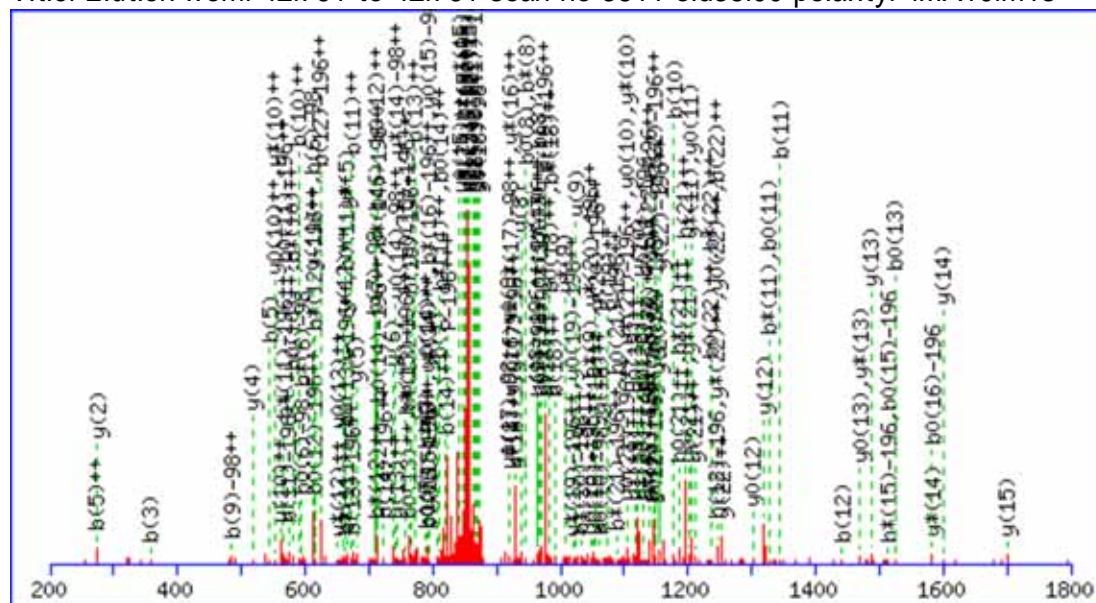

**Monoisotopic mass of neutral peptide Mr(calc): 2662.1677**

**Fixed modifications:** Carbamidomethyl (C) (apply to specified residues or termini only)

**Variable modifications:**

**N-term :** Dimethyl (N-term)

**S6 :** Phospho (ST), with neutral losses 0.0000(shown in table), 97.9769

**S11 :** Phospho (ST), with neutral losses 0.0000(shown in table), 97.9769

**Ions Score: 45 Expect: 0.0023**

**Matched b ions:** b(3), b(5)++, b(5), b(6)-98, b(6), b(7)-98, b(7), b(8), b(8)-98, b(9)-98++, b(9)-98, b(10), b(10)++, b(11)-98++, b(11)-196++, b(11)-98, b(11), b(11)-196, b(11)++, b(12)-196++, b(12), b(12)-98, b(12)-196, b(13)-196++, b(13)-98++, b(13)++, b(14)-196++, b(14)-98++, b(14)++, b(15)++, b(15)-196++, b(15)-98++, b(16)-98++, b(17)++, b(17)-196++, b(17)-98++, b(18)++, b(19)-196++, b(19)-98++, b(19)++, b(20)++, b(20)-98++, b(21)++, b(21)-98++, b(22)-98++, b(22)-196++, b(22)++

**Matched y ions:** y(2), y(4), y(5), y(6), y(7), y(8), y(9), y(10), y(10)++, y(11)++, y(12), y(12)++, y(13), y(13)++, y(14), y(15)++, y(15), y(16)++, y(17)++, y(17)-98++, y(18)-196++, y(18)++, y(19)-98++, y(20)++, y(20)-98++, y(20)-196++, y(21)-98++, y(21)++, y(22)++, y(22)-98++, y(22)-196++

**Precursor origin neutral loss: +**

# Peptide No.688

**QSLGESPRTLSPTPSAEGYQDVR**

Confirmed sites: @S:6,@S:11,@Y:19

Ambiguous sites:

MS/MS Fragmentation of **QSLGESPRTLSPTPSAEGYQDVR**

Found in **ABLM1\_MOUSE**, Actin-binding LIM protein 1 OS=Mus musculus GN=Ablm1 PE=1 SV=1

Match to Query 7145: 2742.135117 from(915.052315,3+)

Title: Elution from: 45.015 to 45.015 scan no 4103 cid35.00 polarity:+:MA10:m1s

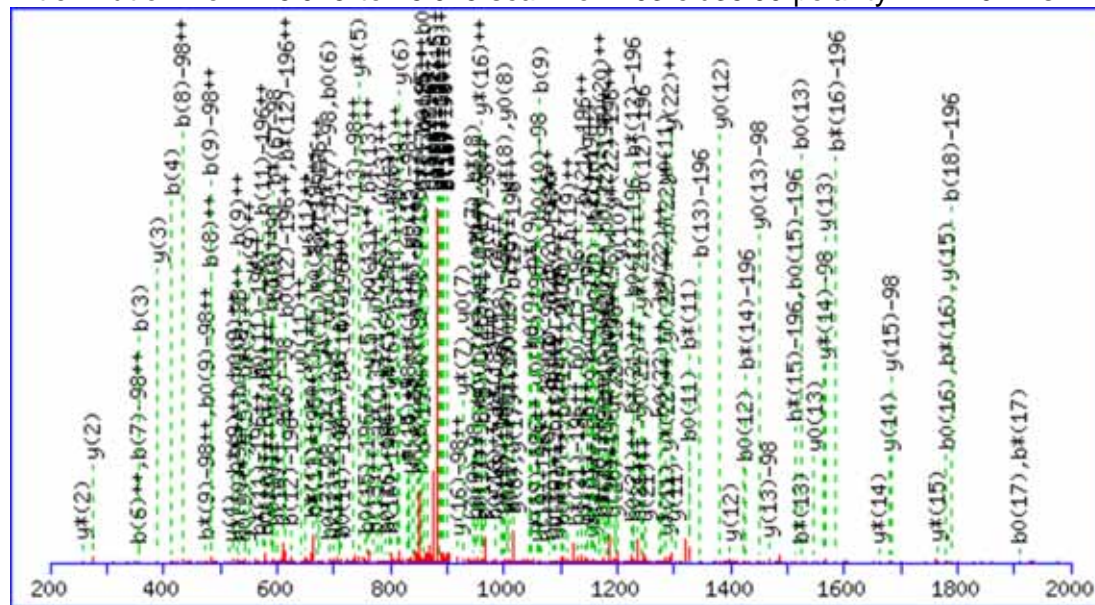

**Monoisotopic mass of neutral peptide Mr(calc): 2742.1340**

**Fixed modifications:** Carbamidomethyl (C) (apply to specified residues or termini only)

**Variable modifications:**

**N-term :** Dimethyl (N-term)

**S6 :** Phospho (ST), with neutral losses 0.0000(shown in table), 97.9769

**S11 :** Phospho (ST), with neutral losses 0.0000(shown in table), 97.9769

**Y19 :** Phospho (Y)

**Ions Score:** 39 **Expect:** 0.0076

**Matched b ions:** b(3), b(4), b(5), b(6)-98, b(6)++, b(6), b(7)-98, b(8)-98, b(8)++, b(8), b(8)-98, b(9)-98, b(9)++, b(9), b(10), b(10)++, b(10)-98, b(11)-98, b(11)++, b(11)-196, b(11)++, b(11)-196, b(12)-196, b(12)-98, b(13)-196, b(13)++, b(13)-196, b(14)-98, b(15)-98, b(16)-98, b(16)++, b(17)-196, b(17)++, b(18)-196, b(18)++, b(18)-98, b(19)++, b(19)-196, b(20)-98, b(20)++, b(20)-196, b(21)-98, b(21)++, b(22)-196, b(22)++

**Matched y ions:** y(2), y(3), y(4), y(5), y(6), y(7), y(8), y(9)++, y(9), y(10), y(10)++, y(11)++, y(11), y(12), y(12)++, y(13), y(13)-98, y(13)++, y(14), y(15)-98, y(15)++, y(15)-98, y(16)++, y(16)-98, y(17)++, y(17)-98, y(18)-98, y(18)++, y(18)-196, y(19)-196, y(19)-98, y(20)-98, y(20)++, y(21)-98, y(21)++, y(21)-196, y(22)++, y(22)-98, y(22)-196

**Precursor origin neutral loss:** +

# Peptide No.689

**QSLGESPRTLSPTPSAEGYQDVR**

Confirmed sites: @S:6,@T:9,@S:11

Ambiguous sites:

MS/MS Fragmentation of **QSLGESPRTLSPTPSAEGYQDVR**

Found in **ABLM1\_MOUSE**, Actin-binding LIM protein 1 OS=Mus musculus GN=Ablm1 PE=1 SV=1

Match to Query 6443: 2742.135915 from(915.052581,3+)

Title: Elution from: 44.958 to 44.958 scan no 4009 cid35.00 polarity:+:MA10:m1s

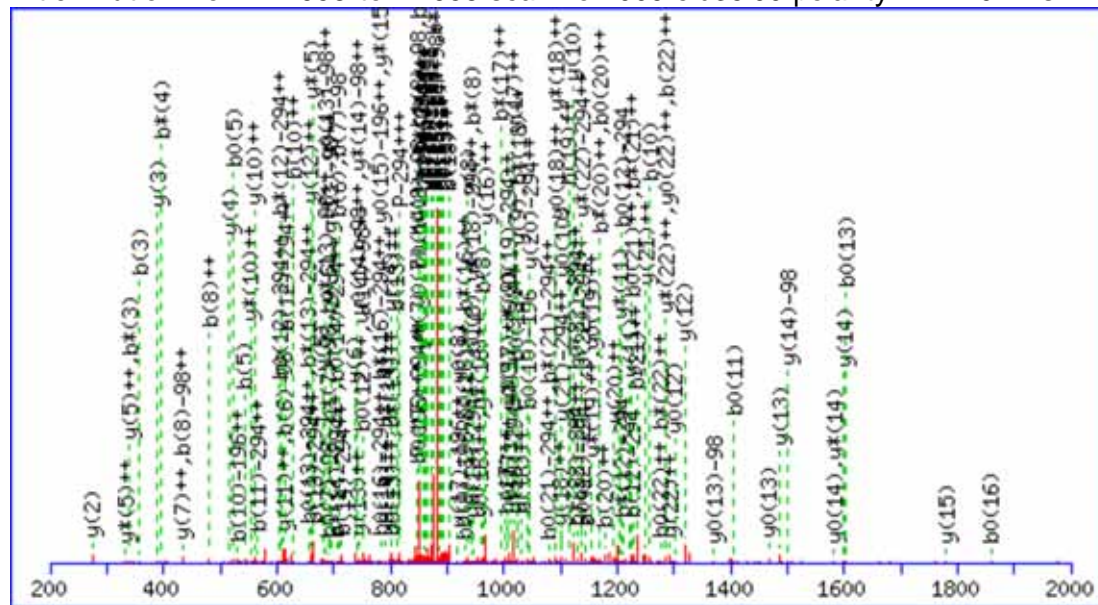

**Monoisotopic mass of neutral peptide Mr(calc): 2742.1340**

**Fixed modifications:** Carbamidomethyl (C) (apply to specified residues or termini only)

**Variable modifications:**

**N-term :** Dimethyl (N-term)

**S6 :** Phospho (ST), with neutral losses 0.0000(shown in table), 97.9769

**T9 :** Phospho (ST), with neutral losses 0.0000(shown in table), 97.9769

**S11 :** Phospho (ST), with neutral losses 0.0000(shown in table), 97.9769

**Ions Score: 55 Expect: 0.00017**

**Matched b ions:** b(3), b(5), b(6)-98, b(6), b(7)-98, b(8)-98++, b(8)++, b(8)-98, b(8), b(9)-98++, b(9), b(9)-98, b(10)-98++, b(10)-98, b(10)-196++, b(10), b(10)++, b(11)-98++, b(11)-98, b(11)-196++, b(11)-294++, b(11)-196, b(12)-196++, b(12)-196, b(12)-294++, b(12)-294, b(13)-196++, b(13)-98++, b(13)-98, b(13)-294++, b(13)++, b(14)-294++, b(14)-196, b(14)-98++, b(15)++, b(15)-196++, b(15)-98++, b(16)-98, b(16)-196, b(16)-98++, b(16)-196++, b(17)++, b(17)-294++, b(17)-98++, b(18)-294++, b(18)++, b(19)-98++, b(19)++, b(20)++, b(20)-196++, b(20)-98++, b(21)++, b(21)-196++, b(21)-98++, b(22)-98++, b(22)-294++, b(22)-196++, b(22)++

**Matched y ions:** y(2), y(3), y(4), y(5)++, y(5), y(6), y(7)++, y(7), y(8), y(9), y(10)++, y(10), y(11)++, y(11), y(12), y(12)++, y(13), y(13)++, y(13)-98++, y(14), y(14)-98, y(14)-98++, y(14)++, y(15), y(15)-98, y(15)++, y(15)-98++, y(16)-196++, y(16)++, y(16)-98++, y(17)++, y(17)-98++, y(17)-196++, y(18)-98++, y(18)++, y(18)-196++, y(19)-294++, y(19)-196++, y(20)++, y(20)-294++, y(20)-196++, y(20)-98++, y(21)-98++, y(21)-196++, y(21)++, y(21)-294++, y(22)++, y(22)-98++, y(22)-196++

**Precursor origin neutral loss: +**







y(13)-98, y(13)-98++, y(13)-196++, y(14), y(14)++, y(14)-98++, y(15)-294, y(15), y(15)-294++, y(15)-196++, y(15)-98++, y(15)++, y(16)++, y(16)-196++, y(16)-98++, y(16)-294++, y(17)++, y(17)-98++, y(17)-294++, y(17)-196++, y(18)-196++, y(18)-98++, y(18)++, y(19)-392++, y(19)++, y(20)-294++, y(20)-196++, y(20)-98++, y(20)++, y(21)-196++, y(21)-98++, y(21)-294++, y(21)++, y(22)-98++, y(22)-196++, y(22)-294++, y(22)++  
**Precursor origin neutral loss: +**

## Peptide No.691

**QSLGESPRTLSPTPSAEGYQDVR**

**Confirmed sites: @S:6,@S:11**

**Ambiguous sites:**

MS/MS Fragmentation of **QSLGESPRTLSPTPSAEGYQDVR**

Found in **ABLM1\_MOUSE**, Actin-binding LIM protein 1 OS=Mus musculus GN=Ablim1 PE=1 SV=1

Match to Query 7161: 2668.200828 from(890.407552,3+)

Title: Elution from: 42.732 to 42.732 scan no 3873 cid35.00 polarity:+:MA10:m1s

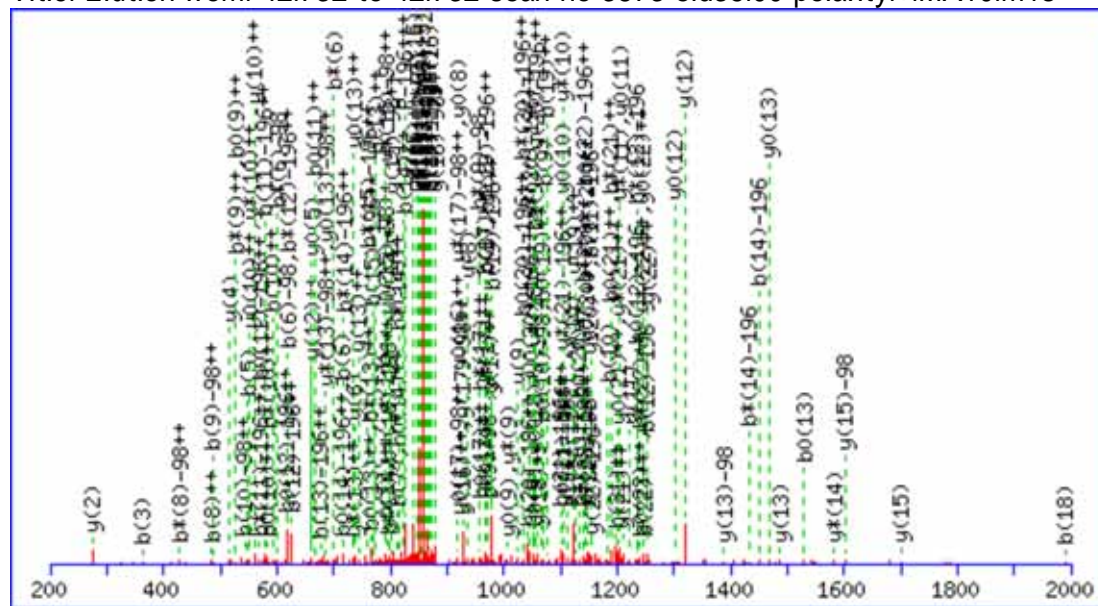

**Monoisotopic mass of neutral peptide Mr(calc): 2668.1995**

**Fixed modifications:** Carbamidomethyl (C) (apply to specified residues or termini only)

**Variable modifications:**

**N-term :** Dimethyl:2H(4)13C(2) (N-term)

**S6 :** Phospho (ST), with neutral losses 0.0000(shown in table), 97.9769

**S11 :** Phospho (ST), with neutral losses 0.0000(shown in table), 97.9769

**Ions Score: 36 Expect: 0.025**

**Matched b ions:** b(3), b(5), b(6)-98, b(6), b(7), b(8)++, b(8), b(8)-98, b(9)-98++, b(9)-98, b(9), b(10)++, b(10)-98++, b(10), b(11)-98++, b(11)-196++, b(11)-98, b(11)-196, b(12)-196++, b(12)-196, b(13)-98, b(13)-196++, b(13)-98++, b(13)++, b(14)-196, b(14)-98++, b(14)++, b(15)++, b(15)-196++, b(16)-98++, b(17)-196++, b(17)-98++, b(17)++, b(18), b(18)-98++, b(19)-196++, b(19)++, b(20)-196++, b(20)++, b(21)++, b(21)-98++, b(21)-196++, b(22)-98++, b(22)-196++, b(22)++

**Matched y ions:** y(2), y(4), y(6), y(7), y(8), y(9), y(10)++, y(10), y(11), y(12), y(12)++, y(13), y(13)-98,





# Peptide No.694

**QSSTADAPEAQHEPGITITEWK**

**Confirmed sites:**

**Ambiguous sites: @S:2orS:3**

MS/MS Fragmentation of **QSSTADAPEAQHEPGITITEWK**

Found in **KPBB\_MOUSE**, Phosphorylase b kinase regulatory subunit beta OS=Mus musculus GN=Phkb PE=1 SV=1

Match to Query 6004: 2531.159946 from(844.727258,3+)

Title: Elution from: 47.758 to 47.758 scan no 4296 cid35.00 polarity:+MA10:m1s

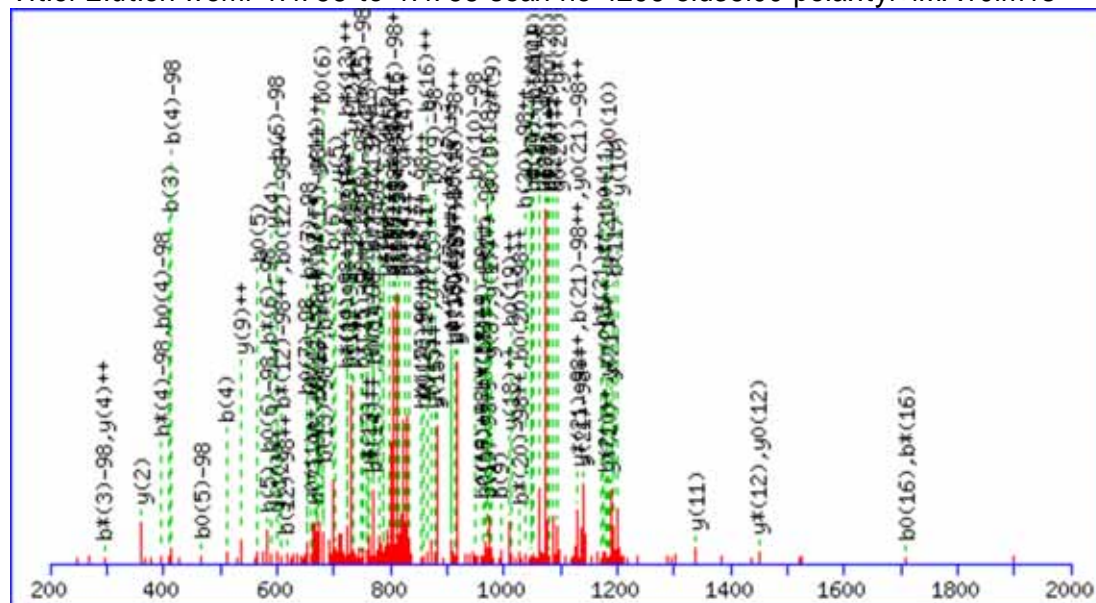

**Monoisotopic mass of neutral peptide Mr(calc): 2531.1581**

**Fixed modifications:** Carbamidomethyl (C) (apply to specified residues or termini only)

**Variable modifications:**

**N-term :** Dimethyl (N-term)

**S2 :** Phospho (ST), with neutral losses 0.0000(shown in table), 97.9769

**K22 :** Dimethyl (K)

**Ions Score:** 41 **Expect:** 0.0073

**Matched b ions:** b(3), b(4)-98, b(4), b(5), b(6)-98, b(6), b(7), b(7)-98, b(8)-98, b(9), b(10)-98, b(11), b(11)-98, b(12)++, b(12)-98++, b(13)++, b(13)-98++, b(14)-98++, b(14)++, b(15)-98++, b(15)++, b(16)++, b(16)-98++, b(18)++, b(19)-98++, b(20)++, b(20)-98++, b(21)-98++, b(21)++

**Matched y ions:** y(2), y(4)++, y(4), y(5), y(6), y(7), y(8), y(9)++, y(9), y(10), y(10)++, y(11), y(11)++, y(12)++, y(13)++, y(14)++, y(15)++, y(16)++, y(17)++, y(18)++, y(19)++, y(21)++, y(21)-98++

**Precursor origin neutral loss:** +

# Peptide No.695





MS/MS Fragmentation of **QSSTADAPEAQHEPGITITEWK**

Found in **KPBB\_MOUSE**, Phosphorylase b kinase regulatory subunit beta OS=Mus musculus GN=Phkb PE=1 SV=1

Match to Query 6181: 2543.224410 from(848.748746,3+)

Title: Elution from: 47.964 to 47.964 scan no 4351 cid35.00 polarity:+:MA10:m1s

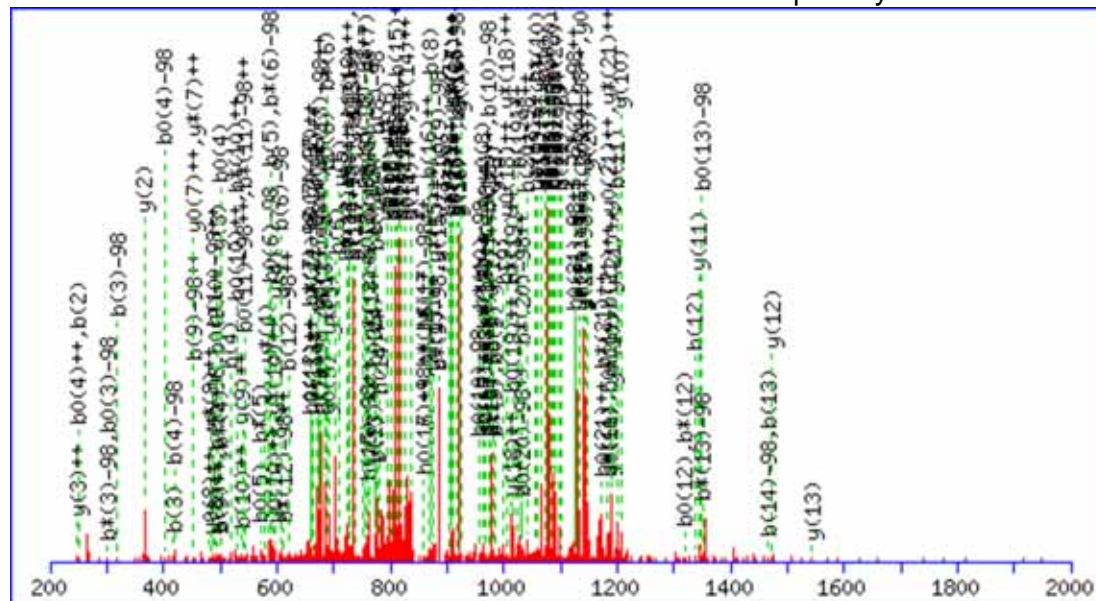

**Monoisotopic mass of neutral peptide Mr(calc): 2543.2217**

**Fixed modifications:** Carbamidomethyl (C) (apply to specified residues or termini only)

**Variable modifications:**

**N-term :** Dimethyl:2H(4)13C(2) (N-term)

**S3 :** Phospho (ST), with neutral losses 0.0000(shown in table), 97.9769

**K22 :** Dimethyl:2H(4)13C(2) (K)

**Ions Score:** 43 **Expect:** 0.005

**Matched b ions:** b(2), b(3)-98, b(3), b(4)-98, b(4), b(5), b(5)-98, b(6), b(6)-98, b(7), b(7)-98, b(8)-98, b(8), b(9)++, b(9), b(9)-98++, b(9)-98, b(10)++, b(10)-98++, b(10)-98, b(10), b(11), b(11)-98, b(12)++, b(12), b(12)-98++, b(13)++, b(13)-98++, b(13), b(14)-98++, b(14)-98, b(14)++, b(15)++, b(15)-98++, b(16)++, b(16)-98++, b(17)++, b(18)++, b(19)++, b(19)-98++, b(20)-98++, b(20)++, b(21)++, b(21)-98++  
**Matched y ions:** y(2), y(3)++, y(3), y(4), y(5), y(6), y(7), y(8)++, y(8), y(9), y(9)++, y(10), y(11), y(11)++, y(12), y(12)++, y(13), y(13)++, y(14)++, y(15)++, y(16)++, y(17)++, y(18)++, y(19)++, y(20)-98++, y(20)++, y(21)++, y(21)-98++

**Precursor origin neutral loss:** +

**Peptide No.697**

**QVHISGIRDSEEER**

**Confirmed sites:** @S:10

**Ambiguous sites:**

MS/MS Fragmentation of **QVHISGIRDSEEER**

Found in **MYOM1\_MOUSE**, Myomesin-1 OS=Mus musculus GN=Myom1 PE=1 SV=2



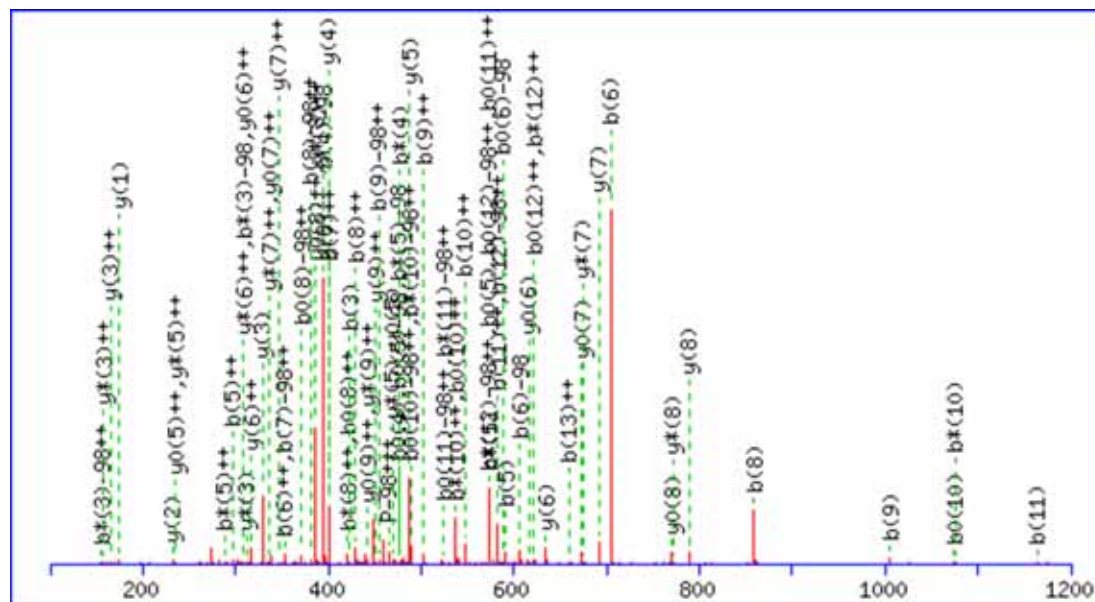

**Monoisotopic mass of neutral peptide Mr(calc):** 1490.7395

**Fixed modifications:** Carbamidomethyl (C) (apply to specified residues or termini only)

**Variable modifications:**

**N-term :** Dimethyl (N-term)

**S3 :** Phospho (ST), with neutral losses 0.0000(shown in table), 97.9769

**Ions Score:** 60 **Expect:** 4.2e-005

**Matched b ions:** b(3), b(4)-98, b(5), b(5)++, b(6), b(6)++, b(6)-98, b(7)-98++, b(7)++, b(8), b(8)++, b(8)-98++, b(9), b(9)++, b(9)-98++, b(10)++, b(11), b(11)++, b(12)-98++, b(13)++

**Matched y ions:** y(1), y(2), y(3), y(3)++, y(4), y(5), y(6)++, y(6), y(7), y(7)++, y(8)++, y(8), y(9)++

**Precursor origin neutral loss:**

## Peptide No.699

**RASAPLPGFSAPGR**

**Confirmed sites:** @S:3

**Ambiguous sites:**

**MS/MS Fragmentation of RASAPLPGFSAPGR**

Found in **HSPB6\_MOUSE**, Heat shock protein beta-6 OS=Mus musculus GN=Hspb6 PE=1 SV=1

Match to Query 1875: 1496.771792 from(749.393172,2+)

Title: Elution from: 39.361 to 39.361 scan no 3335 cid35.00 polarity:+:MA10



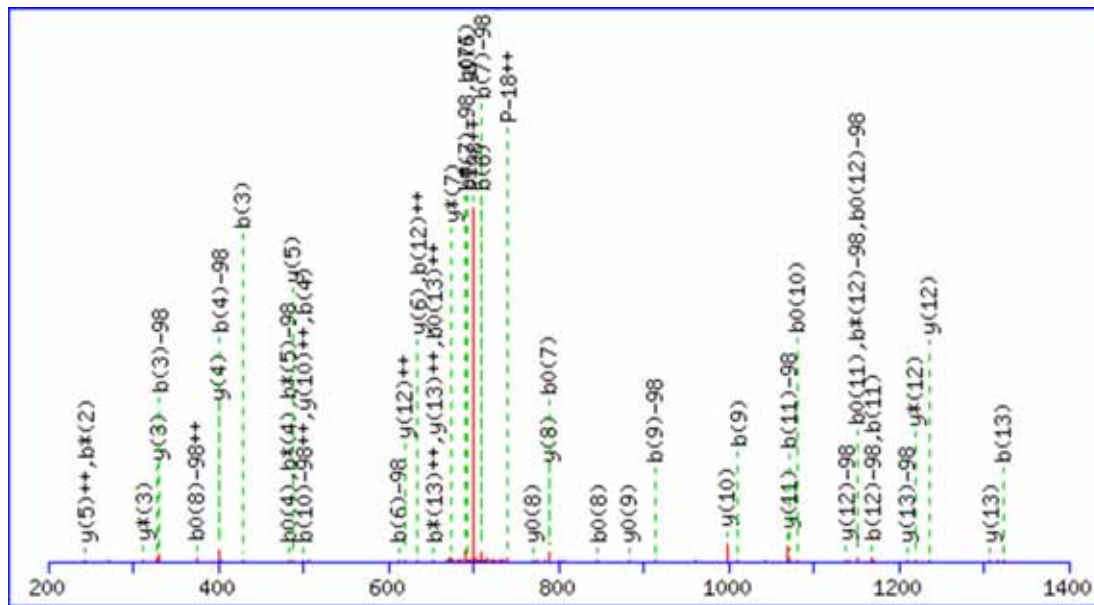

**Monoisotopic mass of neutral peptide Mr(calc):** 1496.7713

**Fixed modifications:** Carbamidomethyl (C) (apply to specified residues or termini only)

**Variable modifications:**

**N-term :** Dimethyl:2H(4)13C(2) (N-term)

**S3 :** Phospho (ST), with neutral losses 97.9769(shown in table), 0.0000

**Ions Score:** 69 **Expect:** 5.6e-006

**Matched b ions:** b(3)-98, b(3), b(4)-98, b(4), b(6)-98, b(6), b(7)-98, b(9)-98, b(9), b(10)-98++, b(11), b(11)-98, b(12)-98, b(12)++, b(13)

**Matched y ions:** y(3), y(4), y(5), y(5)++, y(6), y(7), y(8), y(10), y(10)++, y(11), y(12)++, y(12)-98, y(12), y(13), y(13)-98, y(13)++

**Precursor origin neutral loss:** +

## Peptide No.700

**RASSPGYIDSPTYSR**

**Confirmed sites:** @S:3,@S:4

**Ambiguous sites:**

MS/MS Fragmentation of **RASSPGYIDSPTYSR**

Found in **ABLM3\_MOUSE**, Actin-binding LIM protein 3 OS=Mus musculus GN=Ablim3 PE=1 SV=2

Match to Query 3746: 1849.787337 from(617.603055,3+)

Title: Elution from: 35.069 to 35.069 scan no 2796 cid35.00 polarity:+:MA10

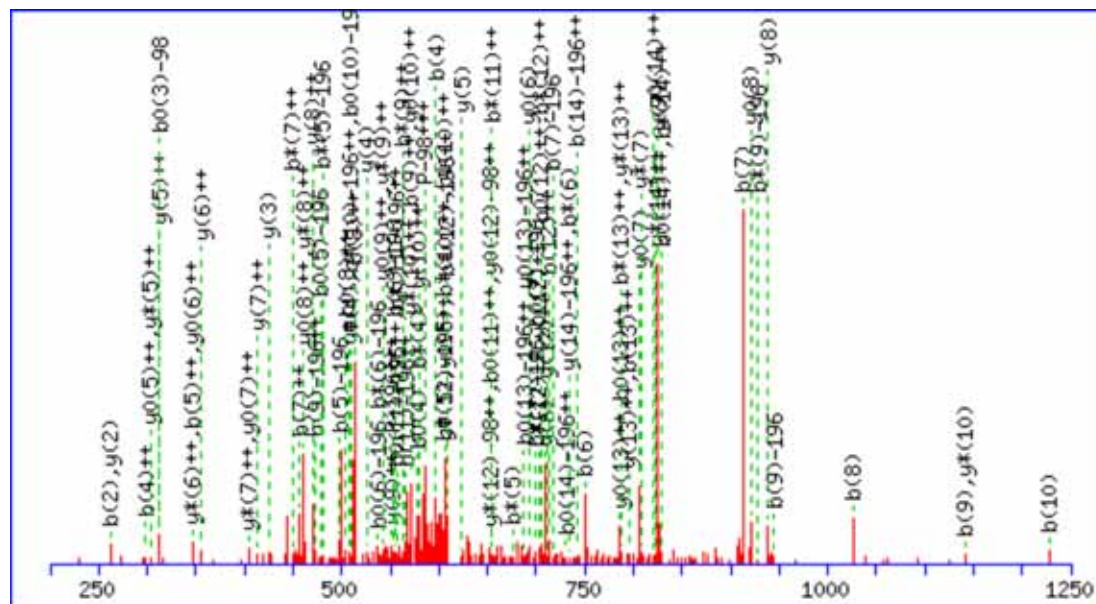

**Monoisotopic mass of neutral peptide Mr(calc):** 1849.7861

**Fixed modifications:** Carbamidomethyl (C) (apply to specified residues or termini only)

**Variable modifications:**

**N-term :** Dimethyl:2H(4)13C(2) (N-term)

**S3 :** Phospho (ST), with neutral losses 0.0000(shown in table), 97.9769

**S4 :** Phospho (ST), with neutral losses 0.0000(shown in table), 97.9769

**Ions Score:** 29 **Expect:** 0.042

**Matched b ions:** b(2), b(4), b(4)++, b(4)-98, b(5)++, b(5)-98++, b(5)-196, b(5)-98, b(6), b(6)-196, b(6)-98, b(7), b(7)++, b(7)-196, b(7)-98, b(8)++, b(8), b(8)-98, b(9), b(9)++, b(9)-196, b(9)-196++, b(9)-98++, b(10), b(10)-98++, b(11)-98, b(11)-196++, b(12)++, b(12)-98++, b(13)++, b(14)-196++

**Matched y ions:** y(2), y(3), y(4), y(5)++, y(5), y(6), y(6)++, y(7), y(7)++, y(8), y(8)++, y(9)++, y(10)++, y(12)++, y(13)++, y(14)-196++, y(14)-98++

**Precursor origin neutral loss:** +

## Peptide No.701

**RDSFDDRGPSLNPVLDYDHGSR**

**Confirmed sites:** @S:10

**Ambiguous sites:**

MS/MS Fragmentation of **RDSFDDRGPSLNPVLDYDHGSR**

Found in **MATR3\_MOUSE**, Matrin-3 OS=Mus musculus GN=Matr3 PE=1 SV=1

Match to Query 6705: 2625.161324 from(657.297607,4+)

Title: Elution from: 44.725 to 44.725 scan no 4050 cid35.00 polarity:+:MA10:m1s

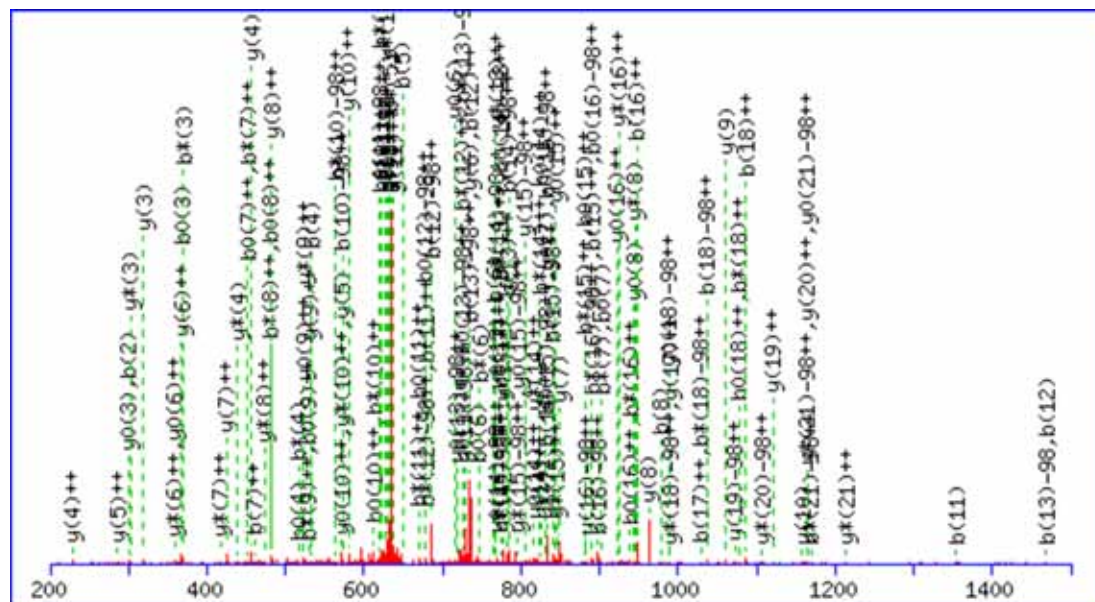

**Monoisotopic mass of neutral peptide Mr(calc):** 2625.1609

**Fixed modifications:** Carbamidomethyl (C) (apply to specified residues or termini only)

**Variable modifications:**

**N-term :** Dimethyl (N-term)

**S10 :** Phospho (ST), with neutral losses 0.0000(shown in table), 97.9769

**Ions Score:** 40 **Expect:** 0.0073

**Matched b ions:** b(2), b(4), b(5), b(6), b(7)++, b(8), b(10)-98++, b(10)++, b(11), b(11)-98++, b(11)++, b(12)++, b(12)-98++, b(13)-98++, b(13)-98, b(13)++, b(14)++, b(14)-98++, b(15)-98++, b(15)++, b(16)++, b(16)-98++, b(17)++, b(18)++, b(18)-98++

**Matched y ions:** y(3), y(4)++, y(4), y(5), y(5)++, y(6)++, y(6), y(7)++, y(7), y(8), y(8)++, y(9), y(9)++, y(10), y(10)++, y(11)++, y(13)++, y(13)-98++, y(14)-98++, y(14)++, y(15)-98++, y(16)-98++, y(17)++, y(19)-98++, y(19)++, y(20)++

**Precursor origin neutral loss:** +

## Peptide No.702

**RDSFDDRGPSLNPVLDYDHGSR**

**Confirmed sites:** @S:3

**Ambiguous sites:**

**MS/MS Fragmentation of RDSFDDRGPSLNPVLDYDHGSR**

Found in **MATR3\_MOUSE**, Matrin-3 OS=Mus musculus GN=Matr3 PE=1 SV=1

Match to Query 7953: 2625.161196 from(657.297575,4+)

Title: Elution from: 45.031 to 45.031 scan no 4307 cid35.00 polarity:+:MA10:m1s

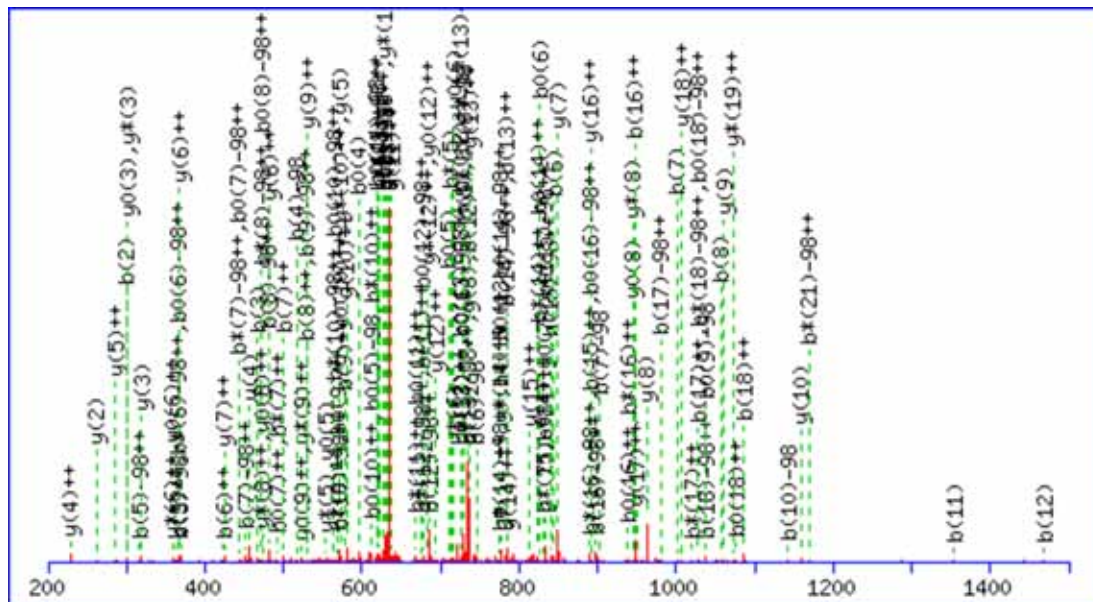

**Monoisotopic mass of neutral peptide Mr(calc):** 2625.1609

**Fixed modifications:** Carbamidomethyl (C) (apply to specified residues or termini only)

**Variable modifications:**

**N-term :** Dimethyl (N-term)

**S3 :** Phospho (ST), with neutral losses 97.9769(shown in table), 0.0000

**Ions Score:** 56 **Expect:** 0.00018

**Matched b ions:** b(2), b(3)-98, b(3), b(4)-98, b(5), b(5)-98, b(5)++, b(5)-98++, b(6), b(6)++, b(6)-98, b(7)++, b(7)-98++, b(7)-98, b(7), b(8)-98++, b(8)++, b(8), b(9)-98++, b(9)++, b(10)-98, b(10)++, b(10)-98++, b(11)-98++, b(11), b(11)++, b(12)++, b(12), b(12)-98++, b(13)-98++, b(13)++, b(14)++, b(14)-98++, b(15)++, b(15)-98++, b(16)++, b(16)-98++, b(17)++, b(17)-98++, b(18)++, b(18)-98++

**Matched y ions:** y(2), y(3), y(4)++, y(4), y(5), y(5)++, y(6), y(6)++, y(7)++, y(7), y(8), y(8)++, y(9), y(9)++, y(10), y(10)++, y(11)++, y(12)++, y(13)++, y(14)++, y(15)++, y(16)++, y(17)++, y(18)++

**Precursor origin neutral loss:** +

## Peptide No.703

**RDSFDDRGPSLNPVLDYDHGSR**

**Confirmed sites:** @S:3

**Ambiguous sites:**

**MS/MS Fragmentation of RDSFDDRGPSLNPVLDYDHGSR**

Found in **MATR3\_MOUSE**, Matrin-3 OS=Mus musculus GN=Matr3 PE=1 SV=1

Match to Query 6247: 2631.193108 from(658.805553,4+)

Title: Elution from: 44.657 to 44.657 scan no 3972 cid35.00 polarity:+:MA10:m1s





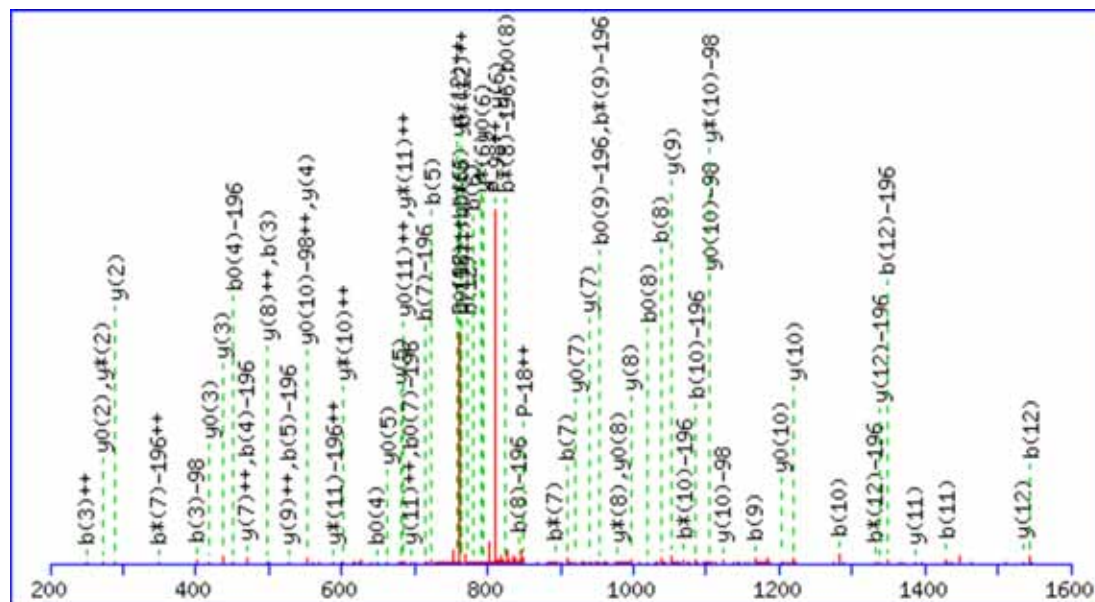

**Monoisotopic mass of neutral peptide Mr(calc):** 1717.6022

**Fixed modifications:** Carbamidomethyl (C) (apply to specified residues or termini only)

**Variable modifications:**

**N-term :** Dimethyl (N-term)

**S3 :** Phospho (ST), with neutral losses 0.0000(shown in table), 97.9769

**S4 :** Phospho (ST), with neutral losses 0.0000(shown in table), 97.9769

**Ions Score:** 83 **Expect:** 3.4e-008

**Matched b ions:** b(3)++, b(3)-98, b(3), b(4)-196, b(4)-98, b(5), b(5)-98, b(5)-196, b(6)-98, b(6), b(7)-98, b(7), b(7)-196, b(8)-98++, b(8), b(8)-98, b(8)-196, b(9), b(9)-98, b(10), b(10)-196, b(10)-98, b(11), b(11)-98, b(12)-98++, b(12)-98, b(12), b(12)-196, b(12)++

**Matched y ions:** y(2), y(3), y(4), y(5), y(6), y(7)++, y(7), y(8)++, y(8), y(9), y(9)++, y(10), y(10)-98, y(11)-98, y(11), y(11)++, y(12), y(12)-98, y(12)-196

**Precursor origin neutral loss:** +

## Peptide No.705

**RFSSGGEEEDFDR**

**Confirmed sites:** @S:3,@S:4

**Ambiguous sites:**

MS/MS Fragmentation of **RFSSGGEEEDFDR**

Found in **ABLM3\_MOUSE**, Actin-binding LIM protein 3 OS=Mus musculus GN=Ablim3 PE=1 SV=2

Match to Query 2991: 1723.635044 from(862.824798,2+)

Title: Elution from: 36.765 to 36.765 scan no 3030 cid35.00 polarity:+:MA10

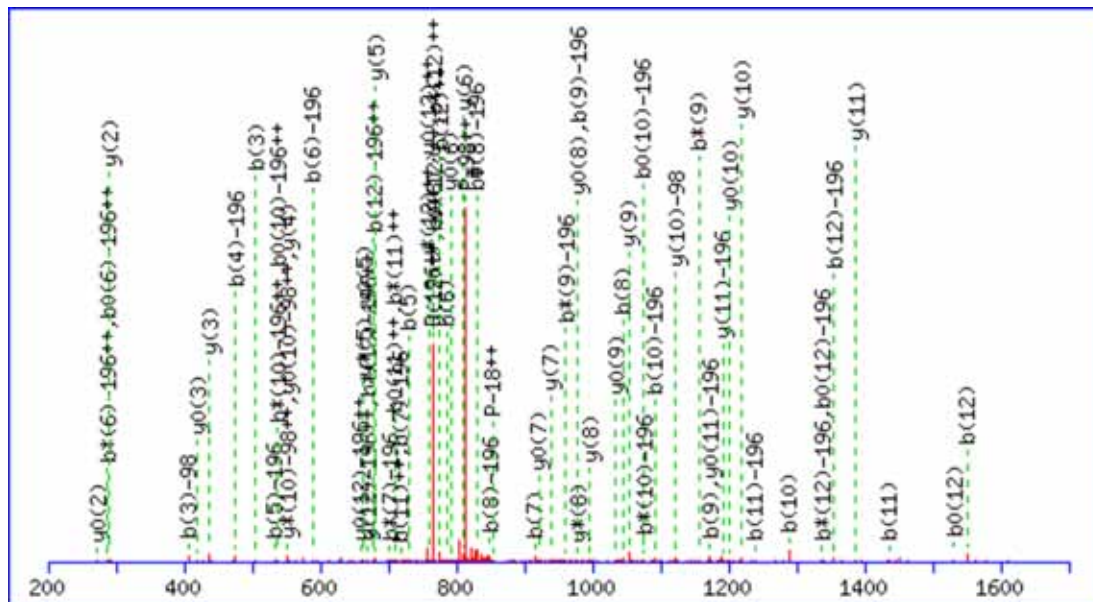

**Monoisotopic mass of neutral peptide Mr(calc):** 1723.6340

**Fixed modifications:** Carbamidomethyl (C) (apply to specified residues or termini only)

**Variable modifications:**

**N-term :** Dimethyl:2H(4)13C(2) (N-term)

**S3 :** Phospho (ST), with neutral losses 97.9769(shown in table), 0.0000

**S4 :** Phospho (ST), with neutral losses 97.9769(shown in table), 0.0000

**Ions Score:** 33 **Expect:** 0.0052

**Matched b ions:** b(3)-98, b(3), b(4)-98, b(4)-196, b(4)-98++, b(5)-98, b(5)-196, b(5), b(6)-196, b(6), b(7), b(7)-196, b(7)-98, b(8), b(8)-98, b(8)-196, b(9), b(9)-98, b(9)-98++, b(9)-196, b(10), b(10)-196, b(10)-98, b(11), b(11)++, b(11)-98, b(11)-196, b(11)-98++, b(12)-98, b(12), b(12)-196, b(12)-98++, b(12)-196++, b(12)++

**Matched y ions:** y(2), y(3), y(4), y(5), y(6), y(7), y(8), y(9), y(10)-98, y(10), y(11)-98, y(11), y(11)-196, y(12)-98, y(12)-98++, y(12)-196++, y(12)++

**Precursor origin neutral loss:** +

## Peptide No.706

**RFSTPAPQPTAEPLAPTVLVPR**

**Confirmed sites:** @S:3,@T:4

**Ambiguous sites:**

MS/MS Fragmentation of **RFSTPAPQPTAEPLAPTVLVPR**

Found in **SYP2L\_MOUSE**, Synaptopodin 2-like protein OS=Mus musculus GN=Synpo2l PE=2 SV=1

Match to Query 6439: 2532.255840 from(845.092556,3+)

Title: Elution from: 56.718 to 56.718 scan no 5345 cid35.00 polarity:+:MA10:m1s

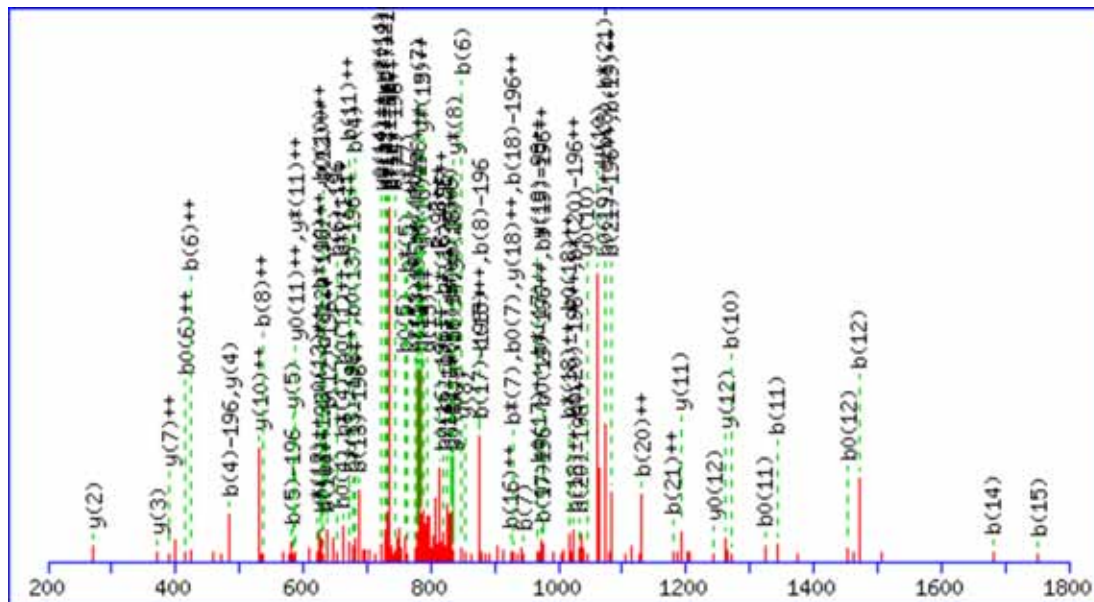

**Monoisotopic mass of neutral peptide Mr(calc):** 2532.2543

**Fixed modifications:** Carbamidomethyl (C) (apply to specified residues or termini only)

**Variable modifications:**

**N-term :** Dimethyl (N-term)

**S3 :** Phospho (ST), with neutral losses 0.0000(shown in table), 97.9769

**T4 :** Phospho (ST), with neutral losses 0.0000(shown in table), 97.9769

**Ions Score:** 51 **Expect:** 0.00068

**Matched b ions:** b(4)-196, b(4)-98, b(4), b(5)-196, b(5)-98, b(6)++, b(6)-98, b(6)-196, b(6), b(7)-98++, b(7), b(8)-196, b(8), b(8)++, b(8)-98, b(9)-98, b(9)-98++, b(9)-196, b(10)++, b(10)-98++, b(10), b(11), b(11)++, b(11)-98, b(11)-98++, b(12)++, b(12), b(12)-196++, b(12)-98++, b(12)-98, b(13)-98++, b(13)-98, b(13)-196++, b(13)++, b(14), b(14)-196++, b(14)-98++, b(15)++, b(15), b(15)-98++, b(15)-196++, b(16)-98++, b(16)-98, b(16)-196++, b(16)++, b(17)-196++, b(17)++, b(18)++, b(18)-196++, b(18)-98++, b(19)++, b(19)-98++, b(20)-98++, b(20)++, b(20)-196++, b(21)-196++, b(21)-98++, b(21)++

**Matched y ions:** y(2), y(3), y(4), y(5), y(7), y(7)++, y(8), y(10)++, y(10), y(11), y(12), y(12)++, y(14)++, y(15)++, y(18)++, y(19)-98++

**Precursor origin neutral loss:** +

## Peptide No.707

**RGPARPSLPGAPPDEVYLSDDSPAEPAPVK**

**Confirmed sites:** @S:19,@S:21

**Ambiguous sites:**

MS/MS Fragmentation of **RGPARPSLPGAPPDEVYLSDDSPAEPAPVK**

Found in **SYP2L\_MOUSE**, Synaptopodin 2-like protein OS=Mus musculus GN=Synpo2l PE=2 SV=1

Match to Query 8673: 3185.520879 from(1062.847569,3+)

Title: Elution from: 47.904 to 47.904 scan no 4655 cid35.00 polarity:+:MA10:m1s







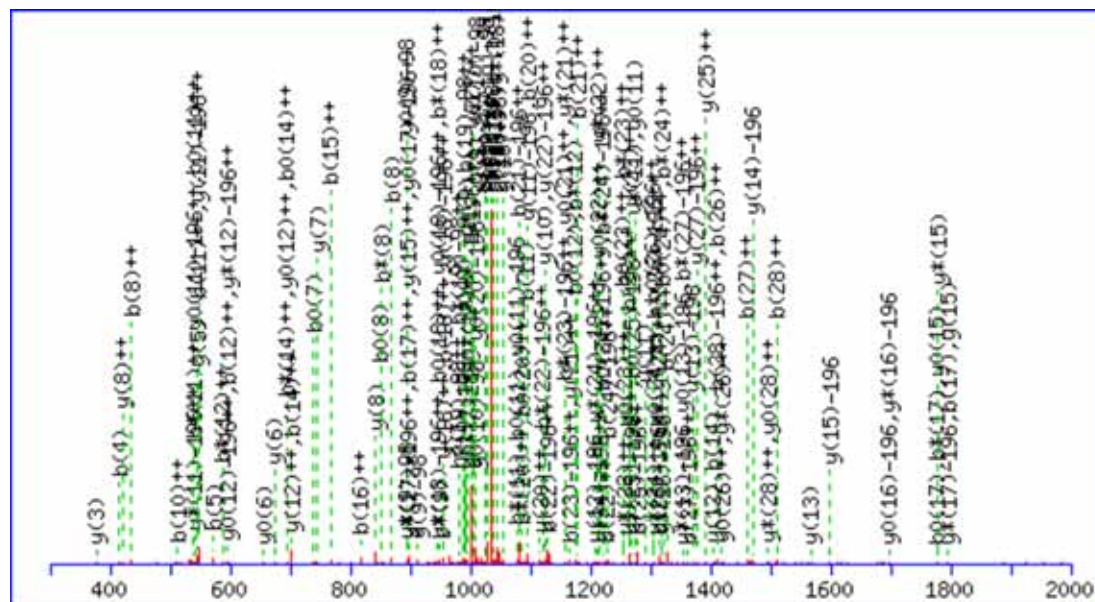

**Monoisotopic mass of neutral peptide Mr(calc):** 3197.5835

**Fixed modifications:** Carbamidomethyl (C) (apply to specified residues or termini only)

**Variable modifications:**

**N-term :** Dimethyl:2H(4)13C(2) (N-term)

**S19 :** Phospho (ST), with neutral losses 97.9769(shown in table), 0.0000

**S21 :** Phospho (ST), with neutral losses 97.9769(shown in table), 0.0000

**K29 :** Dimethyl:2H(4)13C(2) (K)

**Ions Score:** 98 **Expect:** 1.6e-008

**Matched b ions:** b(4), b(5), b(8)++, b(8), b(10)++, b(10), b(11)++, b(11), b(12)++, b(14)++, b(14), b(15)++, b(16)++, b(17)++, b(17), b(18)++, b(19)-98++, b(19)++, b(20)++, b(20)-98++, b(21)-196++, b(21)-98++, b(21)++, b(22)-196++, b(22)-98++, b(22)++, b(23)++, b(23)-98++, b(23)-196++, b(24)++, b(24)-196++, b(24)-98++, b(25)-98++, b(25)-196++, b(26)-196++, b(26)++, b(26)-98++, b(27)-98++, b(27)++, b(27)-196++, b(28)++, b(28)-98++, b(28)-196++

**Matched y ions:** y(3), y(5), y(6), y(7), y(8), y(8)++, y(9)-98, y(9), y(10)-98, y(10), y(11)-196++, y(11)-196, y(11)-98, y(11), y(12)++, y(12), y(12)-98, y(12)-196, y(13)-98, y(13), y(13)-196, y(14)-98, y(14)-196, y(15)++, y(15)-196, y(15)-98, y(15), y(16)++, y(17)-98++, y(17)++, y(18)-196++, y(18)-98++, y(18)++, y(19)-196++, y(19)-98++, y(20)++, y(21)++, y(21)-98++, y(22)-196++, y(23)++, y(24)-98++, y(24)++, y(24)-196++, y(25)++, y(25)-98++, y(26)-98++, y(27)-196++

**Precursor origin neutral loss:** +

## Peptide No.710

**RGPARPSLPGAPPDEVYLS DSPAEPAPVK**

**Confirmed sites:** @Y:17,@S:21

**Ambiguous sites:**

MS/MS Fragmentation of **RGPARPSLPGAPPDEVYLS DSPAEPAPVK**

Found in **SYP2L\_MOUSE**, Synaptopodin 2-like protein OS=Mus musculus GN=Synpo2l PE=2 SV=1

Match to Query 8924: 3197.586440 from(800.403886,4+)

Title: Elution from: 47.519 to 47.519 scan no 4641 cid35.00 polarity:+:MA10:m1s



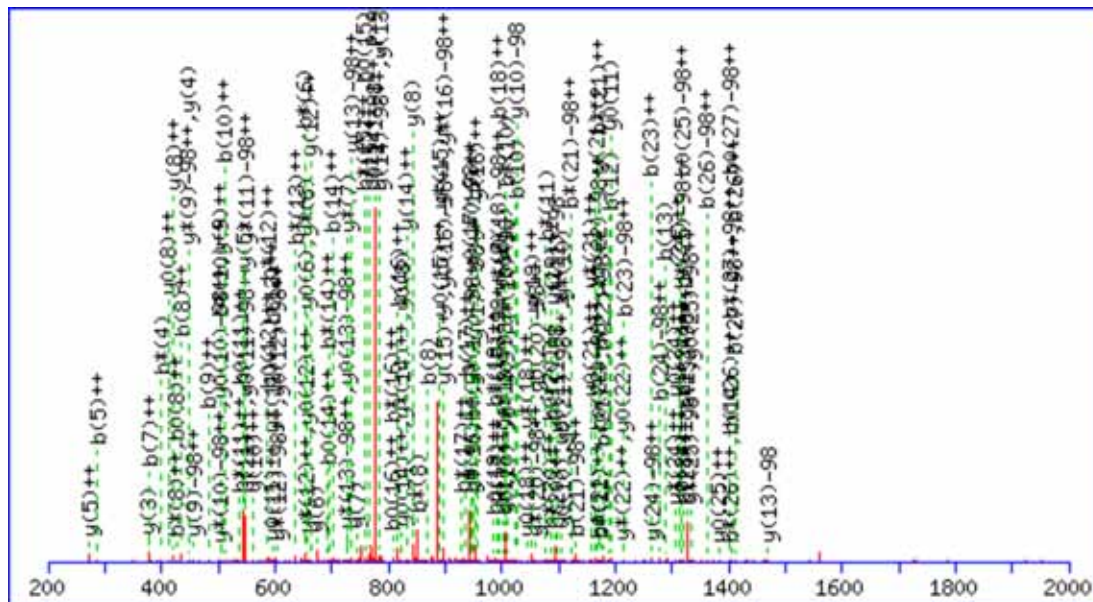

**Monoisotopic mass of neutral peptide Mr(calc):** 3197.5835

**Fixed modifications:** Carbamidomethyl (C) (apply to specified residues or termini only)

**Variable modifications:**

**N-term :** Dimethyl:2H(4)13C(2) (N-term)

**Y17 :** Phospho (Y)

**S21 :** Phospho (ST), with neutral losses 97.9769(shown in table), 0.0000

**K29 :** Dimethyl:2H(4)13C(2) (K)

**Ions Score:** 82 **Expect:** 5.6e-007

**Matched b ions:** b(5)++, b(7)++, b(8)++, b(8), b(9)++, b(10)++, b(10), b(11)++, b(12)++, b(12), b(13), b(14), b(14)++, b(15)++, b(16)++, b(17)++, b(18)++, b(20)++, b(21)++, b(21)-98++, b(22)-98++, b(23)++, b(23)-98++, b(24)++, b(24)-98++, b(25)-98++, b(26)++, b(26)-98++, b(27)-98++

**Matched y ions:** y(3), y(4), y(5)++, y(5), y(6), y(7), y(8)++, y(8), y(9)++, y(9), y(9)-98++, y(10)++, y(10)-98, y(12)++, y(13)++, y(13)-98, y(13)-98++, y(14)-98++, y(14)++, y(15)++, y(16)++, y(17)-98++, y(17)++, y(18)++, y(18)-98++, y(19)++, y(21)++, y(24)-98++, y(24)++

**Precursor origin neutral loss:** +

## Peptide No.711

**RGPNYTSGYGTNSELSNPSETESER**

**Confirmed sites:** @S:16,@S:19

**Ambiguous sites:**

**MS/MS Fragmentation of RGPNYTSGYGTNSELSNPSETESER**

Found in **FXR1\_MOUSE**, Fragile X mental retardation syndrome-related protein 1 OS=Mus musculus  
GN=Fxr1 PE=1 SV=2

Match to Query 8466: 2919.160677 from(974.060835,3+)

Title: Elution from: 37.431 to 37.431 scan no 3322 cid35.00 polarity:+:MA10:m1s



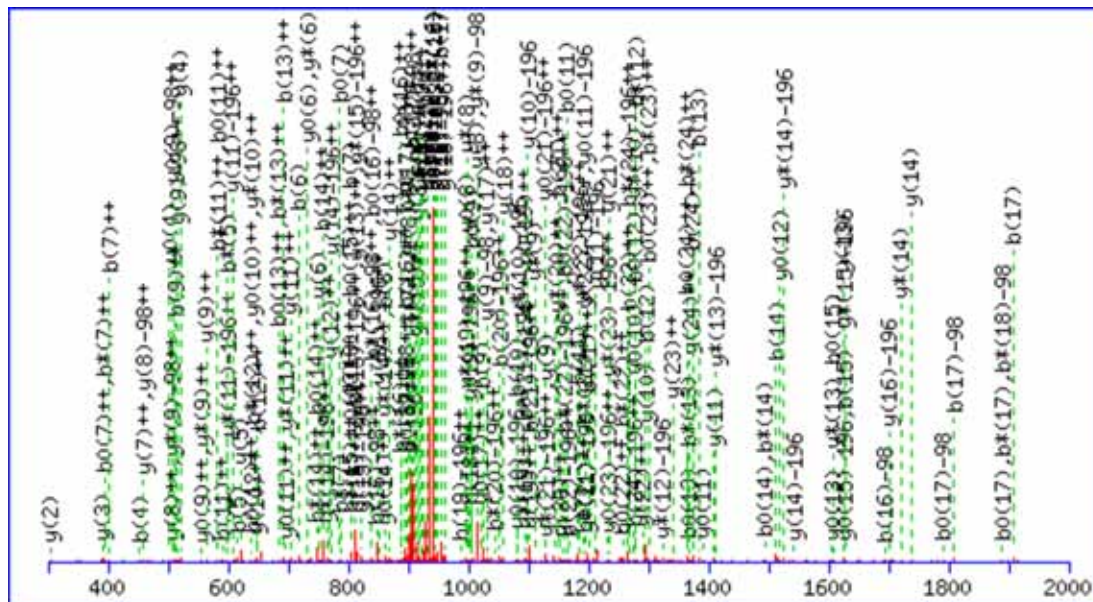

**Monoisotopic mass of neutral peptide Mr(calc):** 2919.1597

**Fixed modifications:** Carbamidomethyl (C) (apply to specified residues or termini only)

**Variable modifications:**

**N-term :** Dimethyl (N-term)

**S16 :** Phospho (ST), with neutral losses 97.9769(shown in table), 0.0000

**S19 :** Phospho (ST), with neutral losses 97.9769(shown in table), 0.0000

**Ions Score:** 57 **Expect:** 9.5e-005

**Matched b ions:** b(4), b(5), b(6), b(7)++, b(7), b(8), b(9), b(9)++, b(10), b(11), b(11)++, b(12), b(12)++, b(13)++, b(13), b(14)++, b(14), b(15)++, b(15), b(16)-98++, b(16)++, b(16)-98, b(17)-98, b(17), b(17)-98++, b(17)++, b(18)-98++, b(18)++, b(19)-196++, b(19)-98++, b(20)-98++, b(20)++, b(20)-196++, b(21)-196++, b(21)-98++, b(21)++, b(22)-98++, b(22)++, b(22)-196++, b(24)++, b(24)-98++, b(24)-196++

**Matched y ions:** y(2), y(3), y(4), y(5), y(6), y(7)++, y(7), y(8), y(8)++, y(8)-98++, y(8)-98, y(9)-98++, y(9), y(9)++, y(9)-98, y(10), y(10)-98, y(10)-98++, y(10)++, y(10)-196, y(11)-98, y(11), y(11)-98++, y(11)++, y(11)-196++, y(11)-196, y(12)-98, y(12)-98++, y(12)++, y(13)++, y(13), y(13)-98, y(13)-98++, y(14), y(14)-196, y(14)-98++, y(14)-196++, y(14)++, y(15)-196++, y(15)-98++, y(15)++, y(16)-98++, y(16)++, y(16)-196++, y(16)-196, y(17)++, y(17)-196++, y(18)-196++, y(18)-98++, y(18)++, y(19)++, y(19)-98++, y(19)-196++, y(20)++, y(20)-98++, y(21)-98++, y(21)++, y(22)-196++, y(22)++, y(23)-98++, y(23)++, y(24)++, y(24)-98++

**Precursor origin neutral loss:** +

## Peptide No.712

**RGPNYTSGYGTNSELSNPSETESER**

**Confirmed sites:** @S:19

**Ambiguous sites:**

MS/MS Fragmentation of **RGPNYTSGYGTNSELSNPSETESER**

Found in **FXR1\_MOUSE**, Fragile X mental retardation syndrome-related protein 1 OS=Mus musculus  
GN=Fxrl PE=1 SV=2

Match to Query 8356: 2839.190961 from(947.404263,3+)



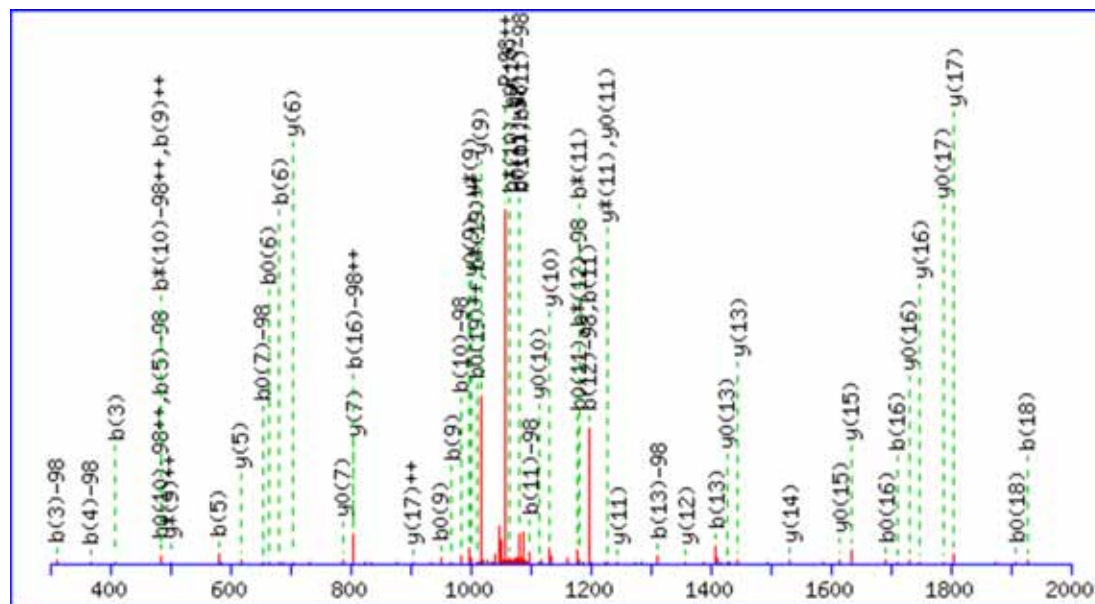

**Monoisotopic mass of neutral peptide Mr(calc):** 2213.0213

**Fixed modifications:** Carbamidomethyl (C) (apply to specified residues or termini only)

**Variable modifications:**

**N-term :** Dimethyl (N-term)

**S3 :** Phospho (ST), with neutral losses 97.9769(shown in table), 0.0000

**Ions Score:** 69 **Expect:** 9.6e-006

**Matched b ions:** b(3)-98, b(3), b(4)-98, b(5)-98, b(5), b(6), b(9)++, b(9), b(10)-98, b(10), b(11), b(11)-98, b(12)-98, b(13), b(13)-98, b(16)-98, b(16), b(18)

**Matched y ions:** y(5), y(6), y(7), y(9), y(10), y(11), y(12), y(13), y(14), y(15), y(16), y(17)++, y(17)

**Precursor origin neutral loss:** +

## Peptide No.714

**RGSGDTSSLIDPDTLSSELR**

**Confirmed sites:** @S:7

**Ambiguous sites:**

**MS/MS Fragmentation of** **RGSGDTSSLIDPDTLSSELR**

Found in **LRRF2\_MOUSE**, Leucine-rich repeat flightless-interacting protein 2 OS=Mus musculus  
GN=Lrrfip2 PE=1 SV=1

Match to Query 6635: 2213.022876 from(738.681568,3+)

Title: Elution from: 52.474 to 52.474 scan no 5197 cid35.00 polarity:+:MA10:m1s





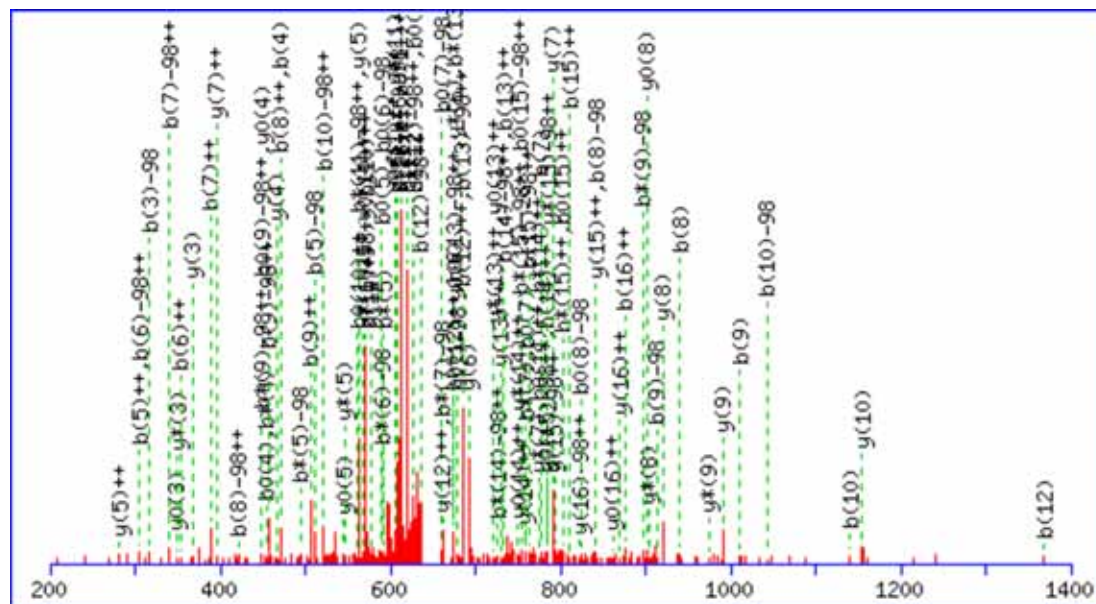

**Monoisotopic mass of neutral peptide Mr(calc):** 1929.9622

**Fixed modifications:** Carbamidomethyl (C) (apply to specified residues or termini only)

**Variable modifications:**

**N-term :** Dimethyl:2H(4)13C(2) (N-term)

**S3 :** Phospho (ST), with neutral losses 0.0000(shown in table), 97.9769

**K17 :** Dimethyl:2H(4)13C(2) (K)

**Ions Score:** 38 **Expect:** 0.01

**Matched b ions:** b(3)-98, b(4), b(5)++, b(5), b(5)-98, b(6)-98++, b(6)-98, b(6)++, b(7)++, b(7)-98++, b(7)-98, b(7), b(8)++, b(8)-98, b(8)-98++, b(8), b(9)++, b(9)-98++, b(9), b(9)-98, b(10)++, b(10), b(10)-98++, b(10)-98, b(11)-98++, b(11)++, b(12), b(12)++, b(12)-98++, b(13)-98++, b(13)++, b(14)-98++, b(14)++, b(15)-98++, b(15)++, b(16)++

**Matched y ions:** y(3), y(4), y(5)++, y(5), y(6), y(7), y(7)++, y(8), y(9), y(10), y(10)++, y(11)++, y(12)++, y(13)++, y(14)++, y(15)++, y(15)-98++, y(16)-98++, y(16)++

**Precursor origin neutral loss:** +

## Peptide No.716

**RGSGSSEDMYLDTPPTSASR**

**Confirmed sites: @S:3**

**Ambiguous sites:**

MS/MS Fragmentation of **RGSGSSEDMYLDTPPTSASR**

Found in **PPR3A\_MOUSE**, Protein phosphatase 1 regulatory subunit 3A OS=Mus musculus

GN=Ppp1r3a PE=1 SV=1

Match to Query 6996: 2139.878685 from(714.300171,3+)

Title: Elution from: 32.453 to 32.453 scan no 2563 cid35.00 polarity:+:MA10:m1s

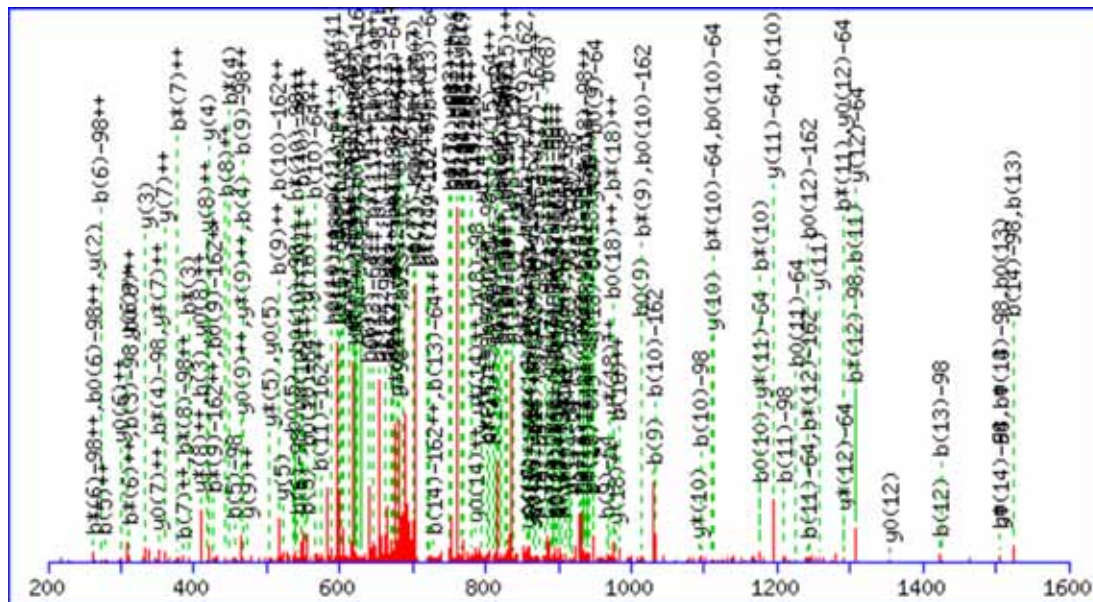

**Monoisotopic mass of neutral peptide Mr(calc):** 2139.8780

**Fixed modifications:** Carbamidomethyl (C) (apply to specified residues or termini only)

**Variable modifications:**

**N-term :** Dimethyl (N-term)

**S3 :** Phospho (ST), with neutral losses 0.0000(shown in table), 97.9769

**M9 :** Oxidation (M), with neutral losses 0.0000(shown in table), 63.9983

**Ions Score:** 59 **Expect:** 5.1e-005

**Matched b ions:** b(3), b(3)-98, b(4), b(5)++, b(5)-98, b(5), b(6)-98++, b(6), b(6)-98, b(7), b(7)++, b(7)-98, b(8), b(8)-98, b(8)++, b(9)++, b(9), b(9)-98, b(9)-98++, b(10)++, b(10), b(10)-98, b(10)-98++, b(11), b(11)++, b(11)-98, b(11)-98++, b(12), b(12)-98, b(12)-98++, b(13)++, b(13), b(13)-98, b(14)-98, b(14)-98++, b(14)++, b(15)++, b(15)-98, b(15)-98++, b(16)++, b(17)-98, b(17)-98++, b(17)++, b(18)++, b(18)-98, b(18)-98++

**Matched y ions:** y(2), y(3), y(4), y(5), y(6)++, y(6), y(7)++, y(7), y(8), y(8)++, y(9), y(9)++, y(10)++, y(10), y(11), y(11)++, y(12)++, y(13)++, y(14)++, y(15)++, y(16)++, y(17)-98, y(17)-98++, y(18)-98, y(18)-98++

**Precursor origin neutral loss:** +

## Peptide No.717

**RGSGSSEDMYLDTPPTSASR**

**Confirmed sites:** @S:3,@S:5

**Ambiguous sites:**

MS/MS Fragmentation of **RGSGSSEDMYLDTPPTSASR**

Found in **PPR3A\_MOUSE**, Protein phosphatase 1 regulatory subunit 3A OS=Mus musculus

GN=Ppp1r3a PE=1 SV=1

Match to Query 5807: 2219.845112 from(1110.929832,2+)

Title: Elution from: 36.211 to 36.211 scan no 2955 cid35.00 polarity:+:MA10:m1s





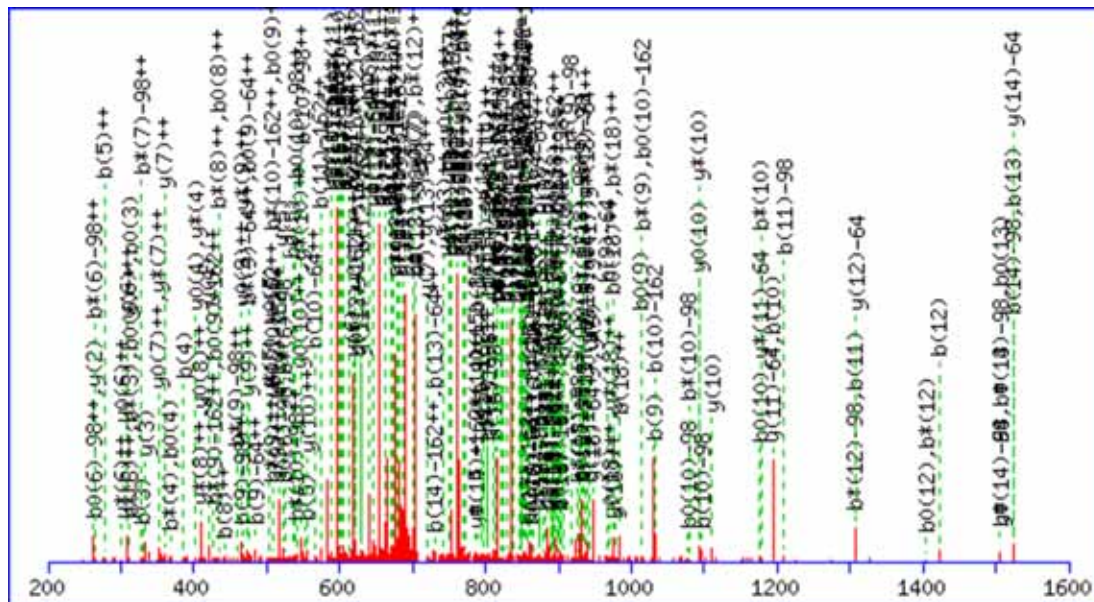

**Monoisotopic mass of neutral peptide Mr(calc):** 2139.8780

**Fixed modifications:** Carbamidomethyl (C) (apply to specified residues or termini only)

**Variable modifications:**

**N-term :** Dimethyl (N-term)

**S5 :** Phospho (ST), with neutral losses 97.9769(shown in table), 0.0000

**M9 :** Oxidation (M), with neutral losses 63.9983(shown in table), 0.0000

**Ions Score:** 58 **Expect:** 6.2e-005

**Matched b ions:** b(3), b(4), b(5)++, b(5), b(6), b(7), b(7)-98, b(8), b(8)++, b(8)-98, b(9)++, b(9), b(9)-98++, b(9)-98, b(10)++, b(10), b(10)-98++, b(10)-98, b(11)++, b(11), b(11)-98, b(11)-98++, b(12), b(12)-98++, b(13)++, b(13), b(14)-98++, b(14)-98, b(14)++, b(15)++, b(15)-98++, b(16)-98++, b(16)++, b(17)++, b(17)-98++, b(18)++, b(18)-98++

**Matched y ions:** y(2), y(3), y(4), y(5), y(6)++, y(6), y(7)++, y(7), y(8), y(9), y(9)++, y(10), y(10)++, y(11)++, y(12)++, y(13)++, y(14)++, y(15)-98++, y(15)++, y(16)-98++, y(16)++, y(17)-98++, y(18)-98++, y(18)++

**Precursor origin neutral loss:**

## Peptide No.719

**RGSGSSEDMYLDTPPTSASR**

**Confirmed sites:** @S:5,@S:6

**Ambiguous sites:**

MS/MS Fragmentation of **RGSGSSEDMYLDTPPTSASR**

Found in **PPR3A\_MOUSE**, Protein phosphatase 1 regulatory subunit 3A OS=Mus musculus  
GN=Ppp1r3a PE=1 SV=1

Match to Query 5661: 2219.845992 from(740.955940,3+)

Title: Elution from: 36.205 to 36.205 scan no 2936 cid35.00 polarity:+:MA10:m1s



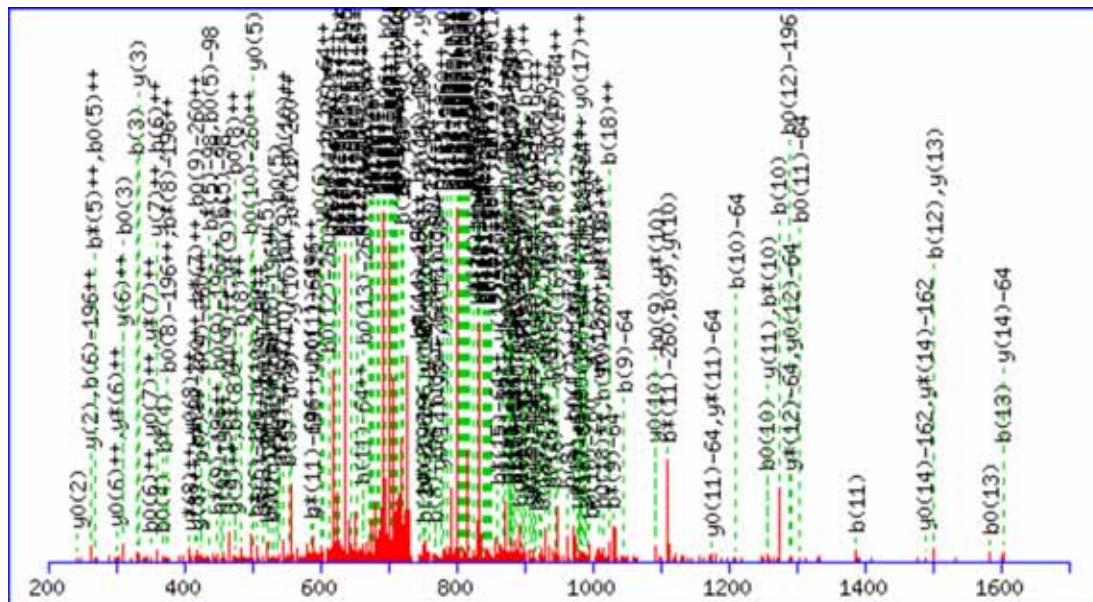

**Monoisotopic mass of neutral peptide Mr(calc):** 2219.8443

**Fixed modifications:** Carbamidomethyl (C) (apply to specified residues or termini only)

**Variable modifications:**

**N-term :** Dimethyl (N-term)

**S5 :** Phospho (ST), with neutral losses 0.0000(shown in table), 97.9769

**S6 :** Phospho (ST), with neutral losses 0.0000(shown in table), 97.9769

**M9 :** Oxidation (M), with neutral losses 0.0000(shown in table), 63.9983

**Ions Score:** 54 **Expect:** 0.0001

**Matched b ions:** b(3), b(5)-98, b(5), b(6)-196++, b(6)++, b(6)-98++, b(6), b(6)-196, b(6)-98, b(7)++, b(7)-98, b(7)-98++, b(7)-196, b(7), b(8)++, b(8), b(8)-98++, b(8)-196, b(8)-98, b(9), b(9)++, b(9)-98++, b(9)-196++, b(9)-196, b(9)-98, b(10)++, b(10)-98, b(10), b(10)-98++, b(10)-196++, b(11), b(11)++, b(11)-98++, b(12), b(12)-98++, b(12)++, b(12)-196++, b(13)++, b(13), b(13)-98++, b(13)-196++, b(14)-98++, b(14)-98, b(14)-196++, b(14)++, b(15)-196++, b(15)++, b(16)-196++, b(16)-98++, b(16)++, b(17)-98++, b(17)-196++, b(17)++, b(18)-98++, b(18)++, b(18)-196++

**Matched y ions:** y(2), y(3), y(4), y(5), y(6)++, y(6), y(7)++, y(7), y(8), y(8)++, y(9), y(9)++, y(10), y(10)++, y(11), y(11)++, y(12)++, y(13), y(13)++, y(14)++, y(14)-98++, y(15)-98++, y(16)++, y(16)-98++, y(16)-196++, y(17)-196++, y(17)++, y(18)-196++

**Precursor origin neutral loss:** +

## Peptide No.720

**RGSGSSEDMYLDTPPTSASR**

**Confirmed sites:** @S:3

**Ambiguous sites:**

MS/MS Fragmentation of **RGSGSSEDMYLDTPPTSASR**

Found in **PPR3A\_MOUSE**, Protein phosphatase 1 regulatory subunit 3A OS=Mus musculus

GN=Ppp1r3a PE=1 SV=1

Match to Query 5340: 2145.909788 from(1073.962170,2+)

Title: Elution from: 32.513 to 32.513 scan no 2440 cid35.00 polarity:+:MA10

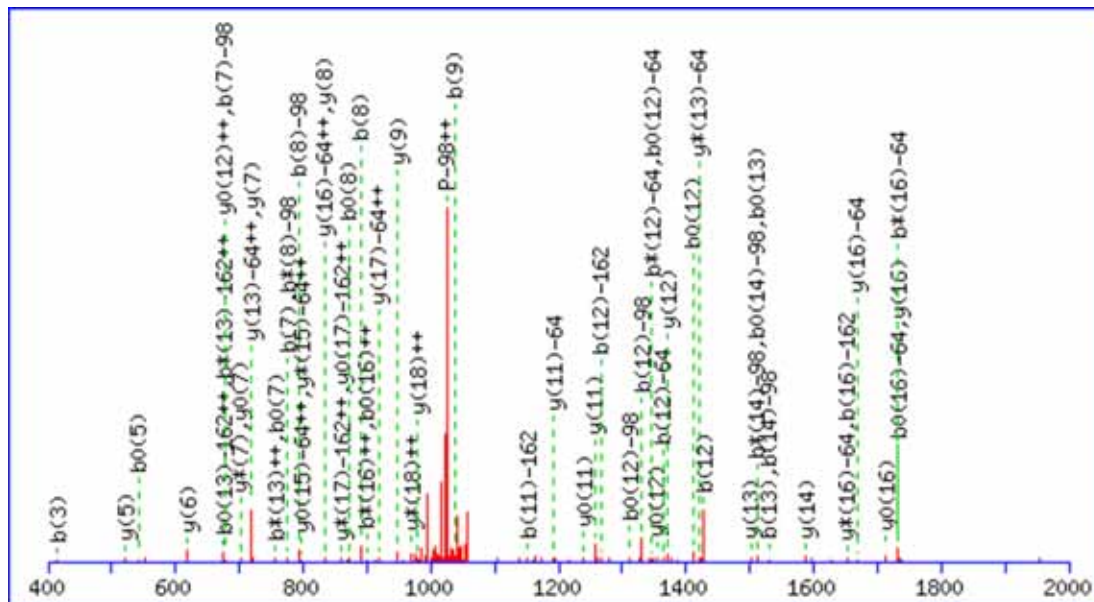

**Monoisotopic mass of neutral peptide Mr(calc):** 2145.9098

**Fixed modifications:** Carbamidomethyl (C) (apply to specified residues or termini only)

**Variable modifications:**

**N-term :** Dimethyl:2H(4)13C(2) (N-term)

**S3 :** Phospho (ST), with neutral losses 0.0000(shown in table), 97.9769

**M9 :** Oxidation (M), with neutral losses 0.0000(shown in table), 63.9983

**Ions Score:** 38 **Expect:** 0.0066

**Matched b ions:** b(3), b(7), b(7)-98, b(8), b(8)-98, b(9), b(12)-98, b(12), b(13), b(14)-98

**Matched y ions:** y(5), y(6), y(7), y(8), y(9), y(11), y(12), y(13), y(14), y(16), y(18)++

**Precursor origin neutral loss:** +

## Peptide No.721

**RGSGSSEDMYLDTPPTSASR**

**Confirmed sites:** @S:6

**Ambiguous sites:**

**MS/MS Fragmentation of** **RGSGSSEDMYLDTPPTSASR**

Found in **PPR3A\_MOUSE**, Protein phosphatase 1 regulatory subunit 3A OS=Mus musculus

GN=Ppp1r3a PE=1 SV=1

Match to Query 4955: 2145.910692 from(716.310840,3+)

Title: Elution from: 32.378 to 32.378 scan no 2325 cid35.00 polarity:+:MA10:m1s

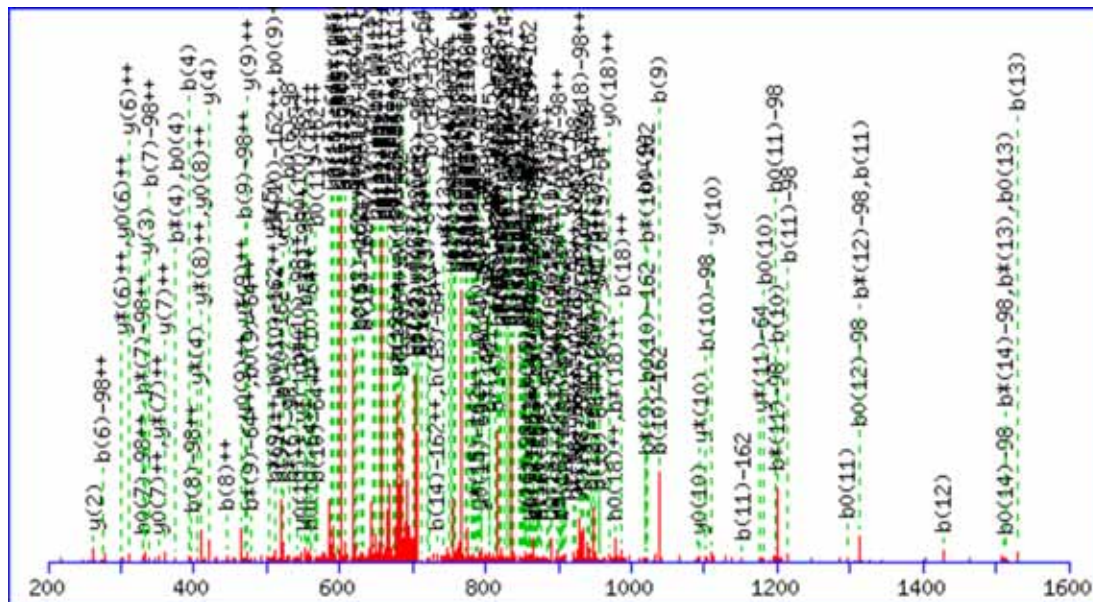

**Monoisotopic mass of neutral peptide Mr(calc):** 2145.9098

**Fixed modifications:** Carbamidomethyl (C) (apply to specified residues or termini only)

**Variable modifications:**

**N-term :** Dimethyl:2H(4)13C(2) (N-term)

**S6 :** Phospho (ST), with neutral losses 0.0000(shown in table), 97.9769

**M9 :** Oxidation (M), with neutral losses 0.0000(shown in table), 63.9983

**Ions Score:** 47 **Expect:** 0.00084

**Matched b ions:** b(4), b(6)-98++, b(6), b(7)-98, b(7), b(7)-98++, b(8), b(8)++, b(8)-98++, b(8)-98, b(9), b(9)++, b(9)-98, b(9)-98++, b(10)++, b(10), b(10)-98, b(10)-98++, b(11)++, b(11), b(11)-98, b(11)-98++, b(12), b(12)-98++, b(13)++, b(13), b(14)-98++, b(14)++, b(15)++, b(15)-98++, b(16)-98++, b(16)++, b(17)++, b(18)++

**Matched y ions:** y(2), y(3), y(4), y(5), y(6)++, y(6), y(7)++, y(7), y(8), y(9), y(9)++, y(10), y(10)++, y(11)++, y(12)++, y(13)++, y(14)++, y(14)-98++, y(15)-98++, y(16)-98++, y(16)++, y(17)-98++, y(17)++, y(18)-98++

**Precursor origin neutral loss:** +

## Peptide No.722

**RGSLELGNPAAHLGDELK**

**Confirmed sites:** @S:3

**Ambiguous sites:**

MS/MS Fragmentation of **RGSLELGNPAAHLGDELK**

Found in **SVIL\_MOUSE**, Supervillin OS=Mus musculus GN=Svil PE=1 SV=1

Match to Query 5471: 2099.042646 from(700.688158,3+)

Title: Elution from: 44.412 to 44.412 scan no 4027 cid35.00 polarity:+:MA10:m1s



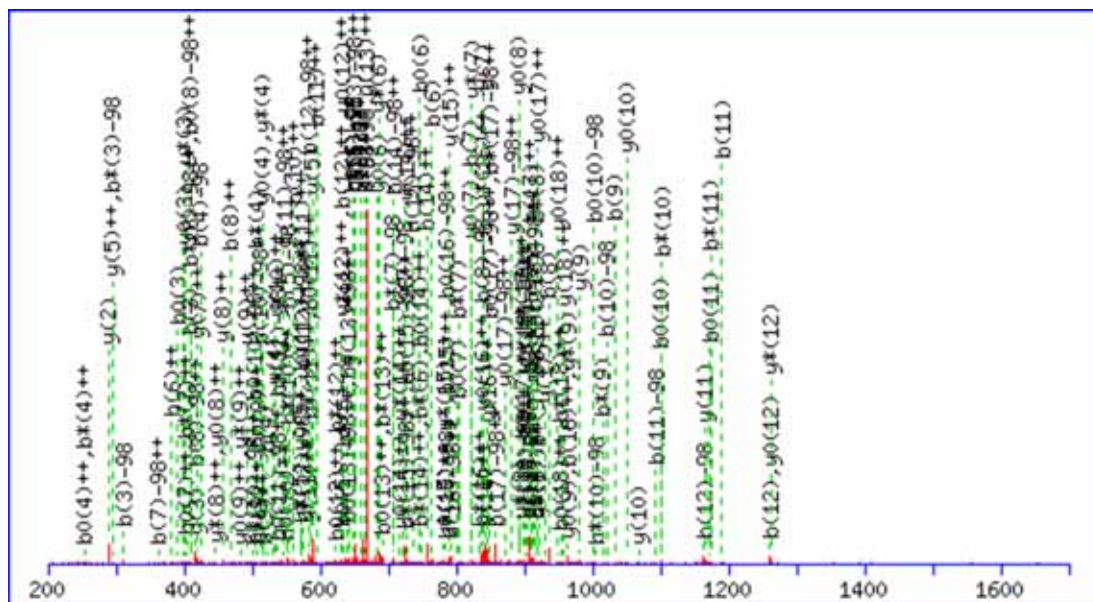

**Monoisotopic mass of neutral peptide Mr(calc):** 2099.0412

**Fixed modifications:** Carbamidomethyl (C) (apply to specified residues or termini only)

**Variable modifications:**

**N-term :** Dimethyl (N-term)

**S3 :** Phospho (ST), with neutral losses 97.9769(shown in table), 0.0000

**K19 :** Dimethyl (K)

**Ions Score:** 57 **Expect:** 0.00015

**Matched b ions:** b(3)-98, b(3), b(4)-98, b(4), b(5), b(5)-98, b(6)++, b(6), b(6)-98, b(7)-98, b(7)-98, b(7), b(8), b(8)-98, b(8)++, b(8)-98, b(8)++, b(9), b(9)++, b(10)-98, b(10)++, b(10)-98, b(11)-98, b(11), b(11)-98, b(11)++, b(12)-98, b(12), b(12)-98, b(12)++, b(13)-98, b(14)++, b(14)-98, b(15)-98, b(15)++, b(16)-98, b(16)++, b(17)++, b(17)-98, b(18)++, b(18)-98

**Matched y ions:** y(2), y(3), y(4), y(5), y(5)++, y(7)++, y(7), y(8)++, y(8), y(9), y(9)++, y(10), y(10)++, y(11)++, y(11), y(12)++, y(13)++, y(14)++, y(15)++, y(16)++, y(17)-98, y(17)++, y(18)-98, y(18)++

**Precursor origin neutral loss:** +

## Peptide No.723

**RGSLELGNPAAHLGDELK**

**Confirmed sites: @S:3**

**Ambiguous sites:**

MS/MS Fragmentation of **RGSLELGNPAAHLGDELK**

Found in **SVIL\_MOUSE**, Supervillin OS=Mus musculus GN=Svil PE=1 SV=1

Match to Query 5281: 2111.105607 from(704.709145,3+)

Title: Elution from: 44.407 to 44.407 scan no 4011 cid35.00 polarity:+:MA10:m1s



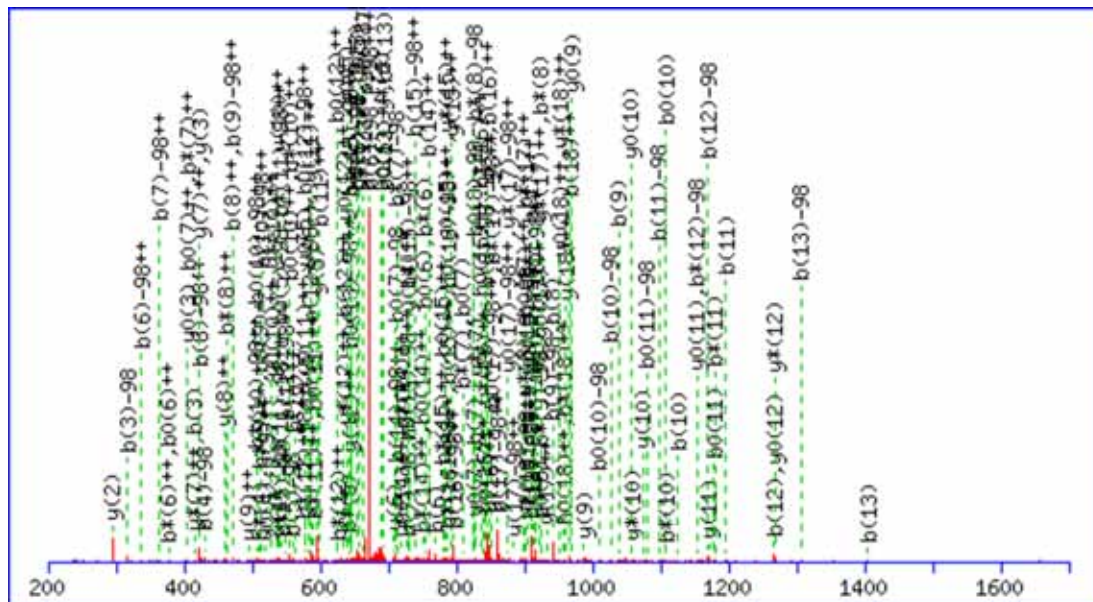

**Monoisotopic mass of neutral peptide Mr(calc):** 2111.1048

**Fixed modifications:** Carbamidomethyl (C) (apply to specified residues or termini only)

**Variable modifications:**

**N-term :** Dimethyl:2H(4)13C(2) (N-term)

**S3 :** Phospho (ST), with neutral losses 97.9769(shown in table), 0.0000

**K19 :** Dimethyl:2H(4)13C(2) (K)

**Ions Score:** 54 **Expect:** 0.00028

**Matched b ions:** b(3)-98, b(3), b(4)-98, b(5)-98, b(5), b(6)-98, b(6), b(6)-98++, b(7), b(7)-98++, b(7)-98, b(8), b(8)++, b(8)-98++, b(8)-98, b(9)-98, b(9)-98++, b(9)++, b(9), b(10)-98, b(10)-98++, b(10)++, b(10), b(11)-98, b(11), b(11)-98++, b(11)++, b(12)-98, b(12), b(12)-98++, b(12)++, b(13), b(13)-98, b(13)-98++, b(14)++, b(14)-98++, b(15)-98++, b(15)++, b(16)-98++, b(16)++, b(17)-98++, b(17)++, b(18)++, b(18)-98++

**Matched y ions:** y(2), y(3), y(4), y(5), y(6), y(7)++, y(7), y(8)++, y(8), y(9)++, y(9), y(10), y(10)++, y(11)++, y(11), y(12)++, y(13)++, y(14)++, y(15)++, y(16)++, y(17)-98++, y(17)++, y(18)-98++, y(18)++

**Precursor origin neutral loss:** +

## Peptide No.724

**RGSMAPLR**

**Confirmed sites:** @S:3

**Ambiguous sites:**

**MS/MS Fragmentation of** **RGSMAPLR**

Found in **CILP1\_MOUSE**, Cartilage intermediate layer protein 1 OS=Mus musculus GN=Cilp PE=2 SV=1

Match to Query 494: 1016.502094 from(509.258323,2+)

Title: Elution from: 29.734 to 29.734 scan no 2108 cid35.00 polarity:+:MA10

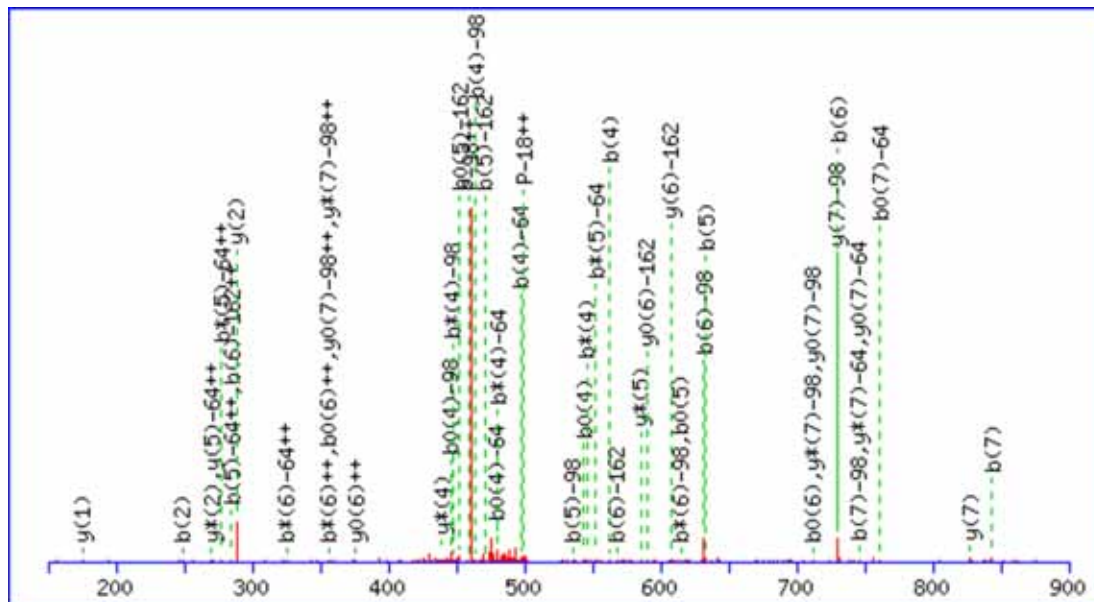

**Monoisotopic mass of neutral peptide Mr(calc):** 1016.5050

**Fixed modifications:** Carbamidomethyl (C) (apply to specified residues or termini only)

**Variable modifications:**

**N-term :** Dimethyl:2H(4)13C(2) (N-term)

**S3 :** Phospho (ST), with neutral losses 0.0000(shown in table), 97.9769

**M4 :** Oxidation (M), with neutral losses 0.0000(shown in table), 63.9983

**Ions Score:** 26 **Expect:** 0.052

**Matched b ions:** b(2), b(4)-98, b(4), b(5), b(5)-98, b(6)-98, b(6), b(7), b(7)-98

**Matched y ions:** y(1), y(2), y(7), y(7)-98

**Precursor origin neutral loss:** +

## Peptide No.725

**RGSSAESALPR**

**Confirmed sites:** @S:3,@S:4

**Ambiguous sites:**

**MS/MS Fragmentation of** **RGSSAESALPR**

Found in **SPEG\_MOUSE**, Striated muscle-specific serine/threonine-protein kinase OS=Mus musculus

GN=Speg PE=1 SV=2

Match to Query 1702: 1317.548330 from(659.781441,2+)

Title: Elution from: 28.703 to 28.703 scan no 2125 cid35.00 polarity:+:MA10

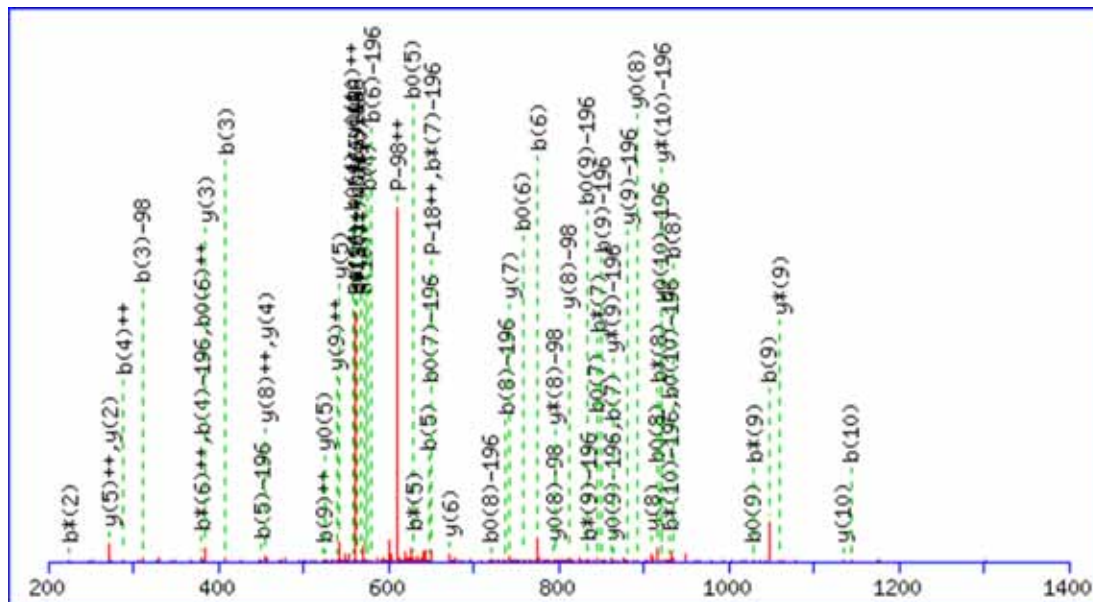

**Monoisotopic mass of neutral peptide Mr(calc):** 1317.5479

**Fixed modifications:** Carbamidomethyl (C) (apply to specified residues or termini only)

**Variable modifications:**

**N-term :** Dimethyl (N-term)

**S3 :** Phospho (ST), with neutral losses 0.0000(shown in table), 97.9769

**S4 :** Phospho (ST), with neutral losses 0.0000(shown in table), 97.9769

**Ions Score:** 32 **Expect:** 0.011

**Matched b ions:** b(3)-98, b(3), b(4)-196, b(4)-98, b(4)++, b(4), b(5)-98, b(5)-196, b(5), b(6), b(6)-98, b(6)-196, b(7), b(7)-98++, b(7)-98, b(8), b(8)-98, b(8)-196, b(9), b(9)-98, b(9)-196, b(9)++, b(10), b(10)-98++, b(10)++

**Matched y ions:** y(2), y(3), y(4), y(5)++, y(5), y(6), y(7), y(8)++, y(8), y(8)-98, y(9)-98, y(9)++, y(9)-196, y(10), y(10)-98, y(10)++

**Precursor origin neutral loss:** +

## Peptide No.726

**RGSSAESALPR**

**Confirmed sites:** @S:3,@S:4

**Ambiguous sites:**

**MS/MS Fragmentation of RGSSAESALPR**

Found in **SPEG\_MOUSE**, Striated muscle-specific serine/threonine-protein kinase OS=Mus musculus  
GN=Speg PE=1 SV=2

Match to Query 1342: 1323.580584 from(662.797568,2+)

Title: Elution from: 28.585 to 28.585 scan no 1952 cid35.00 polarity:+:MA10





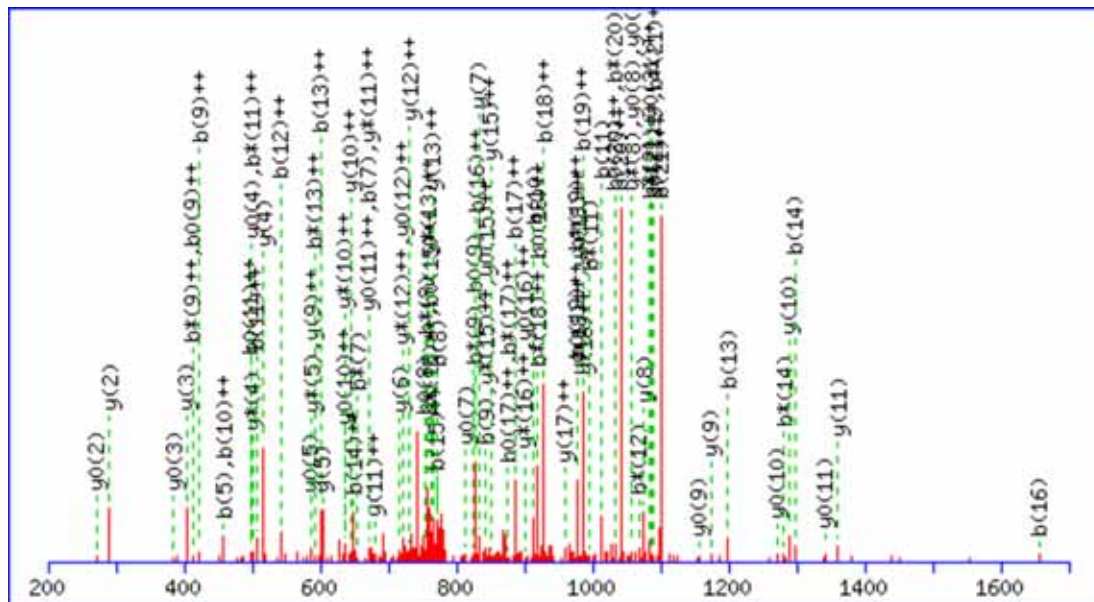

**Monoisotopic mass of neutral peptide Mr(calc):** 2372.1009

**Fixed modifications:** Carbamidomethyl (C) (apply to specified residues or termini only)

**Variable modifications:**

**N-term :** Dimethyl (N-term)

**Y15 :** Phospho (Y)

**Ions Score:** 91 **Expect:** 6.7e-008

**Matched b ions:** b(5), b(7), b(8), b(9)++, b(9), b(10)++, b(10), b(11)++, b(11), b(12)++, b(12), b(13)++, b(13), b(14)++, b(14), b(15)++, b(16)++, b(16), b(17)++, b(18)++, b(19)++, b(20)++, b(21)++

**Matched y ions:** y(2), y(3), y(4), y(5), y(6), y(7), y(8), y(9), y(9)++, y(10), y(10)++, y(11), y(11)++, y(12)++, y(13)++, y(15)++, y(17)++, y(18)++

**Precursor origin neutral loss:**

## Peptide No.728

**RHSDDDDGPGMYFEK**

**Confirmed sites:** @S:3

**Ambiguous sites:**

**MS/MS Fragmentation of** **RHSDDDDGPGMYFEK**

Found in **CMYA5\_MOUSE**, Cardiomyopathy-associated protein 5 OS=Mus musculus GN=Cmya5 PE=1 SV=2

Match to Query 4686: 1905.762840 from(636.261556,3+)

Title: Elution from: 34.280 to 34.280 scan no 2722 cid35.00 polarity:+:MA10:m1s

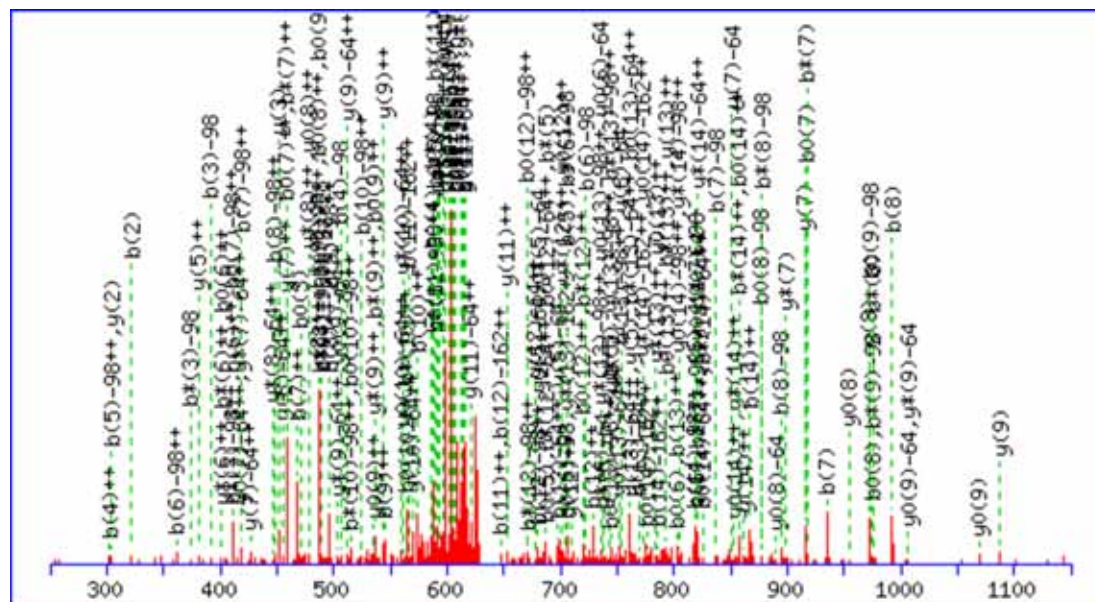

**Monoisotopic mass of neutral peptide Mr(calc):** 1905.7604

**Fixed modifications:** Carbamidomethyl (C) (apply to specified residues or termini only)

**Variable modifications:**

**N-term :** Dimethyl (N-term)

**S3 :** Phospho (ST), with neutral losses 0.0000(shown in table), 97.9769

**M11 :** Oxidation (M), with neutral losses 0.0000(shown in table), 63.9983

**K15 :** Dimethyl (K)

**Ions Score:** 61 **Expect:** 2.2e-005

**Matched b ions:** b(2), b(3)-98, b(3), b(4), b(4)++, b(4)-98, b(5)-98++, b(5), b(5)-98, b(6)++, b(6), b(6)-98++, b(6)-98, b(7), b(7)-98++, b(7)++, b(7)-98, b(8), b(8)++, b(8)-98++, b(8)-98, b(9)-98++, b(9)++, b(10)-98++, b(10)++, b(11)-98++, b(11)++, b(12)++, b(12)-98++, b(13)++, b(13)-98++, b(14)-98++, b(14)++

**Matched y ions:** y(2), y(3), y(4), y(5), y(5)++, y(6), y(7)++, y(7), y(8)++, y(8), y(9), y(9)++, y(10)++, y(11)++, y(12)++, y(13)++, y(13)-98++, y(14)++

**Precursor origin neutral loss:** +

## Peptide No.729

**RHSDTDDGPGMYFEK**

**Confirmed sites:** @S:3

**Ambiguous sites:**

**MS/MS Fragmentation of RHSDTDDGPGMYFEK**

Found in **CMYA5\_MOUSE**, Cardiomyopathy-associated protein 5 OS=Mus musculus GN=Cmya5 PE=1 SV=2

Match to Query 4994: 1889.765682 from(630.929170,3+)

Title: Elution from: 37.330 to 37.330 scan no 3308 cid35.00 polarity:+:MA10:m1s

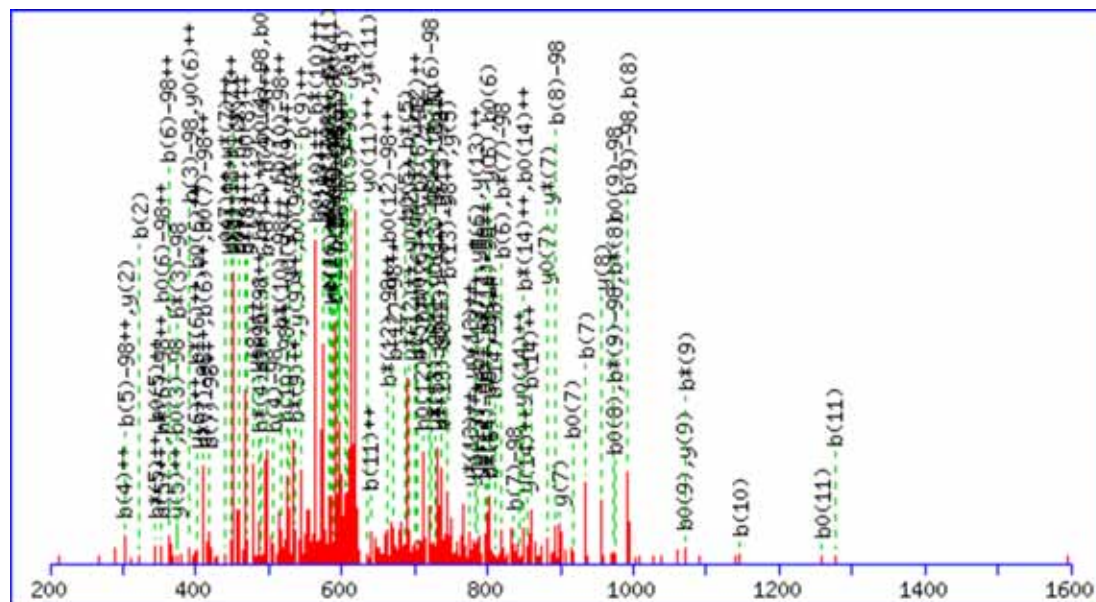

**Monoisotopic mass of neutral peptide Mr(calc):** 1889.7655

**Fixed modifications:** Carbamidomethyl (C) (apply to specified residues or termini only)

**Variable modifications:**

**N-term :** Dimethyl (N-term)

**S3 :** Phospho (ST), with neutral losses 0.0000(shown in table), 97.9769

**K15 :** Dimethyl (K)

**Ions Score:** 39 **Expect:** 0.0039

**Matched b ions:** b(2), b(3)-98, b(3), b(4)++, b(4)-98, b(4), b(5)-98++, b(5)++, b(5)-98, b(5), b(6)++, b(6)-98++, b(6), b(6)-98, b(7)++, b(7), b(7)-98++, b(7)-98, b(8), b(8)++, b(8)-98, b(8)-98++, b(9)-98, b(9)-98++, b(9)++, b(10), b(10)++, b(10)-98++, b(11), b(11)-98++, b(11)++, b(12)++, b(12)-98++, b(13)-98++, b(14)++, b(14)-98++

**Matched y ions:** y(2), y(3), y(4), y(5), y(5)++, y(6), y(6)++, y(7)++, y(7), y(8), y(8)++, y(9), y(9)++, y(10)++, y(12)++, y(13)-98++, y(13)++, y(14)++

**Precursor origin neutral loss:**

## Peptide No.730

**RHSDTDDGPGMYFEK**

**Confirmed sites:** @T:5

**Ambiguous sites:**

MS/MS Fragmentation of **RHSDTDDGPGMYFEK**

Found in **CMYA5\_MOUSE**, Cardiomyopathy-associated protein 5 OS=Mus musculus GN=Cmya5 PE=1 SV=2

Match to Query 3826: 1889.765481 from(630.929103,3+)

Title: Elution from: 36.849 to 36.849 scan no 2930 cid35.00 polarity:+:MA10:m1s





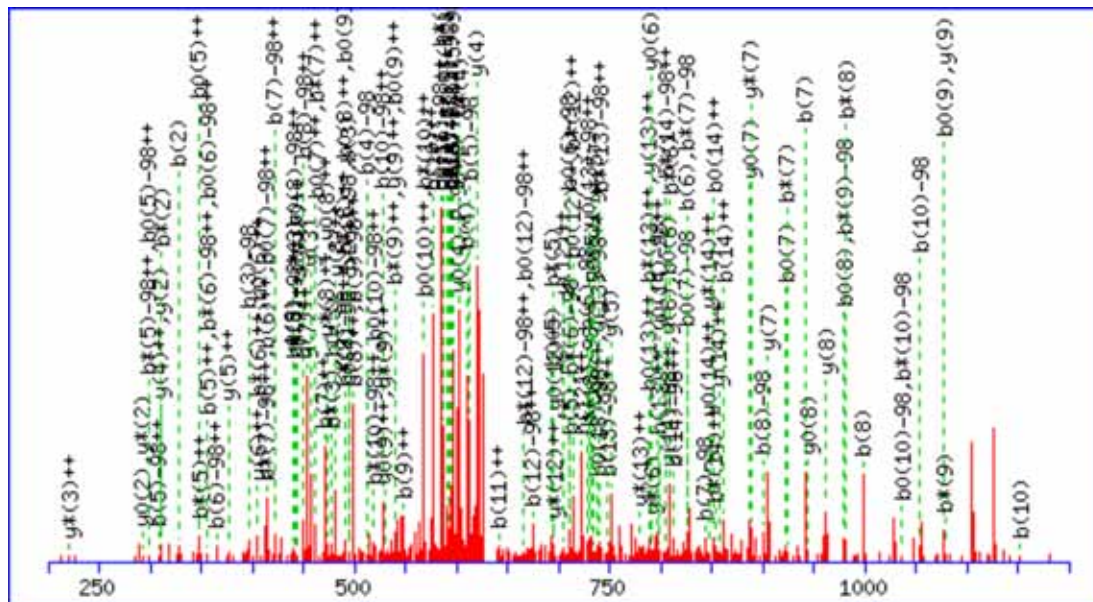

**Monoisotopic mass of neutral peptide Mr(calc):** 1901.8291

**Fixed modifications:** Carbamidomethyl (C) (apply to specified residues or termini only)

**Variable modifications:**

**N-term :** Dimethyl:2H(4)13C(2) (N-term)

**S3 :** Phospho (ST), with neutral losses 0.0000(shown in table), 97.9769

**K15 :** Dimethyl:2H(4)13C(2) (K)

**Ions Score:** 33 **Expect:** 0.022

**Matched b ions:** b(2), b(3)-98, b(3), b(4), b(4)-98, b(5)-98, b(5)-98++, b(5)-98, b(5)++, b(5), b(6)-98, b(6)-98++, b(6)++, b(6), b(6)-98, b(7), b(7)++, b(7)-98, b(7)-98++, b(7)-98, b(8)++, b(8), b(8)-98, b(8)-98++, b(8)-98, b(9)-98, b(9)-98++, b(9)++, b(10)++, b(10)-98, b(10), b(10)-98, b(10)-98++, b(11)-98, b(11)-98++, b(11)++, b(12)++, b(12)-98, b(12)-98++, b(13)++, b(13)-98, b(13)-98++, b(14)++, b(14)-98, b(14)-98++

**Matched y ions:** y(2), y(3), y(4), y(4)++, y(5), y(5)++, y(6)++, y(6), y(7)++, y(7), y(8), y(8)++, y(9), y(9)++, y(10)++, y(12)++, y(13)-98, y(13)-98++, y(13)++, y(14)-98, y(14)-98++, y(14)++

**Precursor origin neutral loss:** +

## Peptide No.732

**RHSGDFGADAQGAMSK**

**Confirmed sites:** @S:15

**Ambiguous sites:**

**MS/MS Fragmentation of RHSGDFGADAQGAMSK**

Found in **MYG\_MOUSE**, Myoglobin OS=Mus musculus GN=Mb PE=1 SV=3

Match to Query 3624: 1785.750912 from(596.257580,3+)

Title: Elution from: 21.804 to 21.804 scan no 1111 cid35.00 polarity:+:MA10

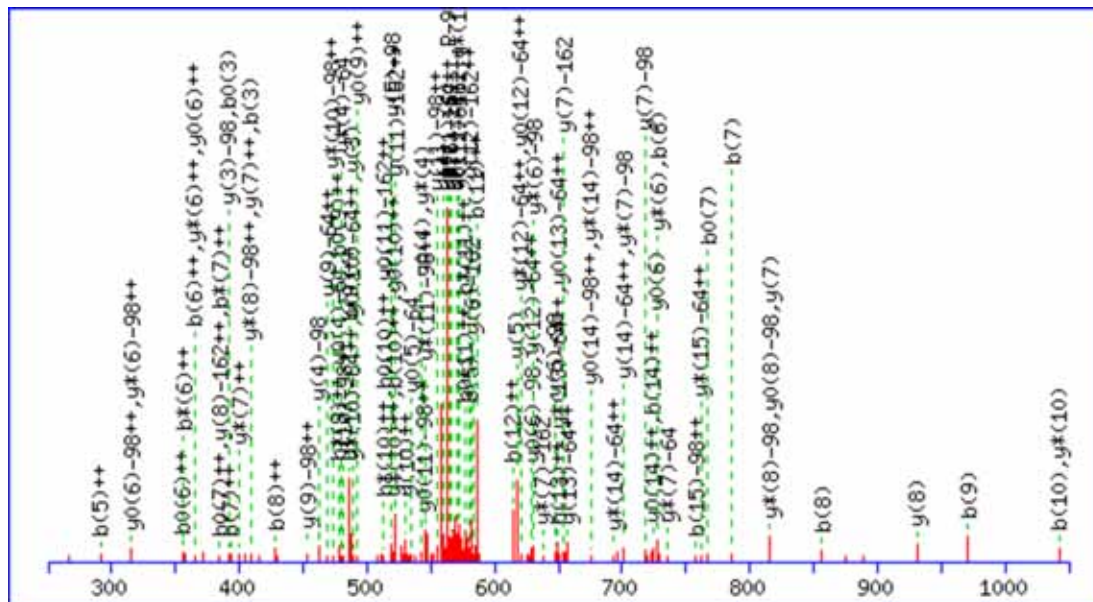

**Monoisotopic mass of neutral peptide Mr(calc):** 1785.7505

**Fixed modifications:** Carbamidomethyl (C) (apply to specified residues or termini only)

**Variable modifications:**

**N-term :** Dimethyl (N-term)

**M14 :** Oxidation (M), with neutral losses 0.0000(shown in table), 63.9983

**S15 :** Phospho (ST), with neutral losses 0.0000(shown in table), 97.9769

**K16 :** Dimethyl (K)

**Ions Score:** 58 **Expect:** 5.1e-005

**Matched b ions:** b(3), b(5)++, b(5), b(6), b(6)++, b(7), b(7)++, b(8)++, b(8), b(9), b(9)++, b(10), b(10)++, b(11)++, b(12)++, b(13)++, b(14)++, b(15)-98++

**Matched y ions:** y(3)-98, y(3), y(4)-98, y(4), y(5), y(5)-98, y(6)-98, y(7), y(7)++, y(7)-98, y(8), y(9)-98++, y(10)-98++, y(10)++, y(11)-98++

**Precursor origin neutral loss:** +

## Peptide No.733

**RHSGDFGADAQGAMSK**

**Confirmed sites:** @S:3

**Ambiguous sites:**

**MS/MS Fragmentation of RHSGDFGADAQGAMSK**

Found in **MYG\_MOUSE**, Myoglobin OS=Mus musculus GN=Mb PE=1 SV=3

Match to Query 3282: 1785.751713 from(596.257847,3+)

Title: Elution from: 22.160 to 22.160 scan no 1124 cid35.00 polarity:+:MA10



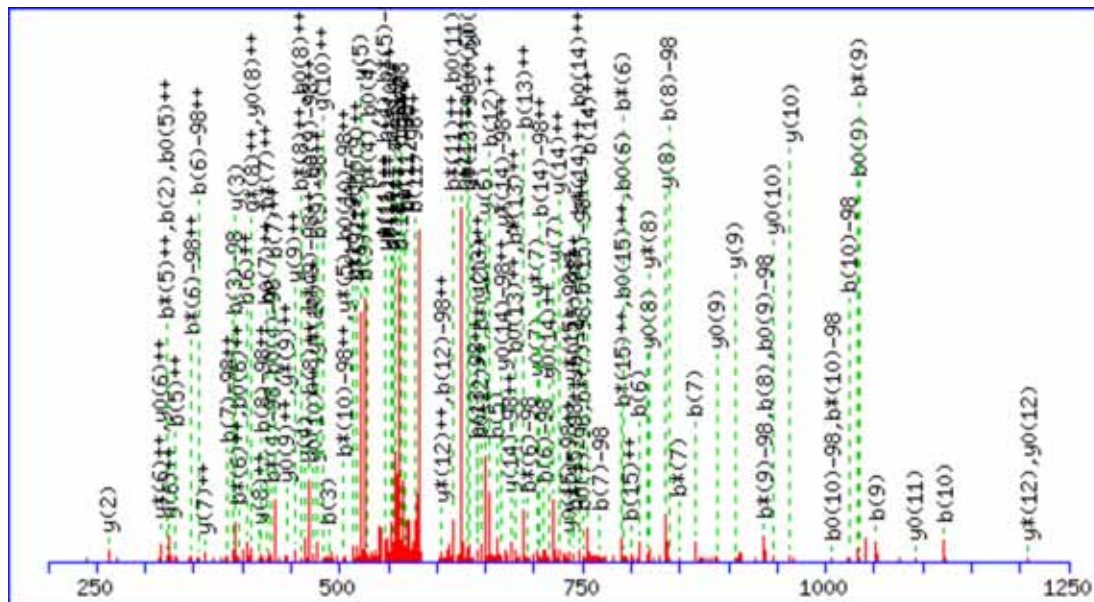

**Monoisotopic mass of neutral peptide Mr(calc):** 1769.7556

**Fixed modifications:** Carbamidomethyl (C) (apply to specified residues or termini only)

**Variable modifications:**

**N-term :** Dimethyl (N-term)

**S3 :** Phospho (ST), with neutral losses 0.0000(shown in table), 97.9769

**K16 :** Dimethyl (K)

**Ions Score:** 82 **Expect:** 2.1e-007

**Matched b ions:** b(2), b(3)-98, b(3), b(4), b(5)++, b(5), b(5)-98, b(6)++, b(6), b(6)-98++, b(6)-98, b(7)++, b(7), b(7)-98++, b(7)-98, b(8), b(8)++, b(8)-98++, b(8)-98, b(9)++, b(9), b(9)-98++, b(10), b(10)++, b(10)-98, b(10)-98++, b(11)++, b(11)-98++, b(12)++, b(12)-98++, b(13)++, b(13)-98++, b(14)++, b(14)-98++, b(15)++, b(15)-98++

**Matched y ions:** y(2), y(3), y(4), y(5), y(6)++, y(6), y(7), y(7)++, y(8), y(8)++, y(9)++, y(9), y(10), y(10)++, y(11)++, y(13)++, y(14)-98++, y(14)++

**Precursor origin neutral loss:** +

## Peptide No.735

**RHSGDFGADAQGAMSK**

**Confirmed sites:** @S:15

**Ambiguous sites:**

MS/MS Fragmentation of **RHSGDFGADAQGAMSK**

Found in **MYG\_MOUSE**, Myoglobin OS=Mus musculus GN=Mb PE=1 SV=3

Match to Query 3273: 1797.814962 from(600.278930,3+)

Title: Elution from: 21.703 to 21.703 scan no 1098 cid35.00 polarity:+:MA10





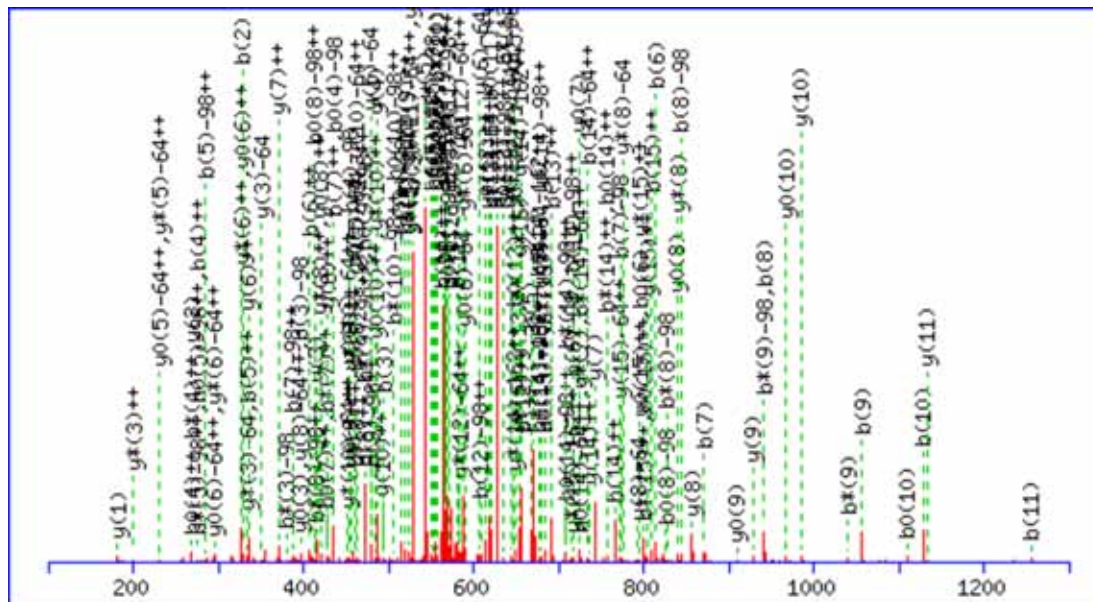

**Monoisotopic mass of neutral peptide Mr(calc):** 1797.8142

**Fixed modifications:** Carbamidomethyl (C) (apply to specified residues or termini only)

**Variable modifications:**

**N-term :** Dimethyl:2H(4)13C(2) (N-term)

**S3 :** Phospho (ST), with neutral losses 0.0000(shown in table), 97.9769

**M14 :** Oxidation (M), with neutral losses 0.0000(shown in table), 63.9983

**K16 :** Dimethyl:2H(4)13C(2) (K)

**Ions Score:** 74 **Expect:** 2.3e-006

**Matched b ions:** b(2), b(3)-98, b(3), b(4)++, b(4)-98, b(4), b(5)-98, b(5)++, b(5), b(5)-98++, b(6), b(6)++, b(6)-98, b(7)++, b(7), b(7)-98++, b(7)-98, b(8)++, b(8), b(8)-98, b(9), b(9)++, b(9)-98++, b(10), b(10)++, b(10)-98++, b(11)++, b(11), b(11)-98++, b(12)++, b(12)-98++, b(13)++, b(13)-98++, b(14)++, b(14)-98++, b(15)++

**Matched y ions:** y(1), y(2), y(3), y(4), y(5), y(6)++, y(6), y(7), y(7)++, y(8), y(8)++, y(9), y(10), y(10)++, y(11), y(11)++, y(13)++, y(14)++, y(15)++

**Precursor origin neutral loss:**

## Peptide No.737

**RHSGDFGADAQGAMSK**

**Confirmed sites:** @S:3

**Ambiguous sites:**

**MS/MS Fragmentation of RHSGDFGADAQGAMSK**

Found in **MYG\_MOUSE**, Myoglobin OS=Mus musculus GN=Mb PE=1 SV=3

Match to Query 3260: 1781.820306 from(594.947378,3+)

Title: Elution from: 28.039 to 28.039 scan no 1886 cid35.00 polarity:+:MA10

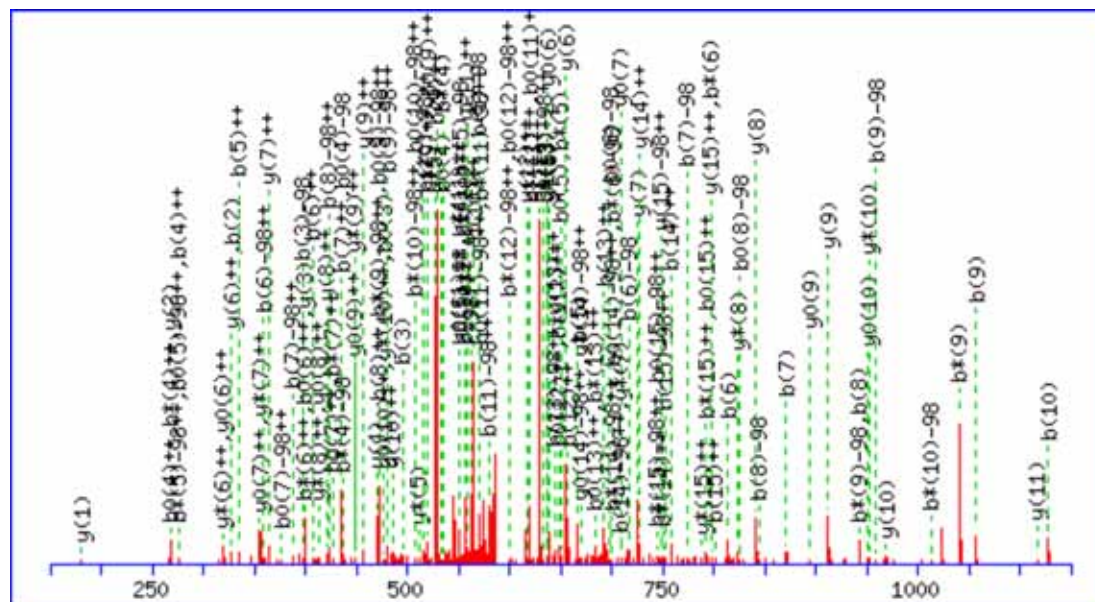

**Monoisotopic mass of neutral peptide Mr(calc):** 1781.8192

**Fixed modifications:** Carbamidomethyl (C) (apply to specified residues or termini only)

**Variable modifications:**

**N-term :** Dimethyl:2H(4)13C(2) (N-term)

**S3 :** Phospho (ST), with neutral losses 0.0000(shown in table), 97.9769

**K16 :** Dimethyl:2H(4)13C(2) (K)

**Ions Score:** 91 **Expect:** 4.9e-008

**Matched b ions:** b(2), b(3)-98, b(3), b(4)++, b(4), b(5)++, b(5), b(5)-98, b(6), b(6)-98, b(6)-98++, b(6)++, b(7)++, b(7), b(7)-98++, b(7)-98, b(8)++, b(8), b(8)-98++, b(8)-98, b(9)++, b(9), b(9)-98++, b(9)-98, b(10), b(10)++, b(10)-98++, b(11)++, b(11)-98++, b(12)++, b(13)++, b(13)-98++, b(14)++, b(14)-98++, b(15)-98++, b(15)++

**Matched y ions:** y(1), y(2), y(3), y(4), y(5), y(6), y(6)++, y(7), y(7)++, y(8), y(8)++, y(9), y(9)++, y(10), y(10)++, y(11), y(11)++, y(12)++, y(13)++, y(14)++, y(15)-98++, y(15)++

**Precursor origin neutral loss:**

## Peptide No.738

**RHSGQDVHVVLK**

**Confirmed sites: @S:3**

**Ambiguous sites:**

**MS/MS Fragmentation of RHSGQDVHVVLK**

Found in **NSF1C\_MOUSE**, NSFL1 cofactor p47 OS=Mus musculus GN=Nsf1c PE=1 SV=1

Match to Query 3226: 1509.781696 from(378.452700,4+)

Title: Elution from: 23.180 to 23.180 scan no 1309 cid35.00 polarity:+:MA10

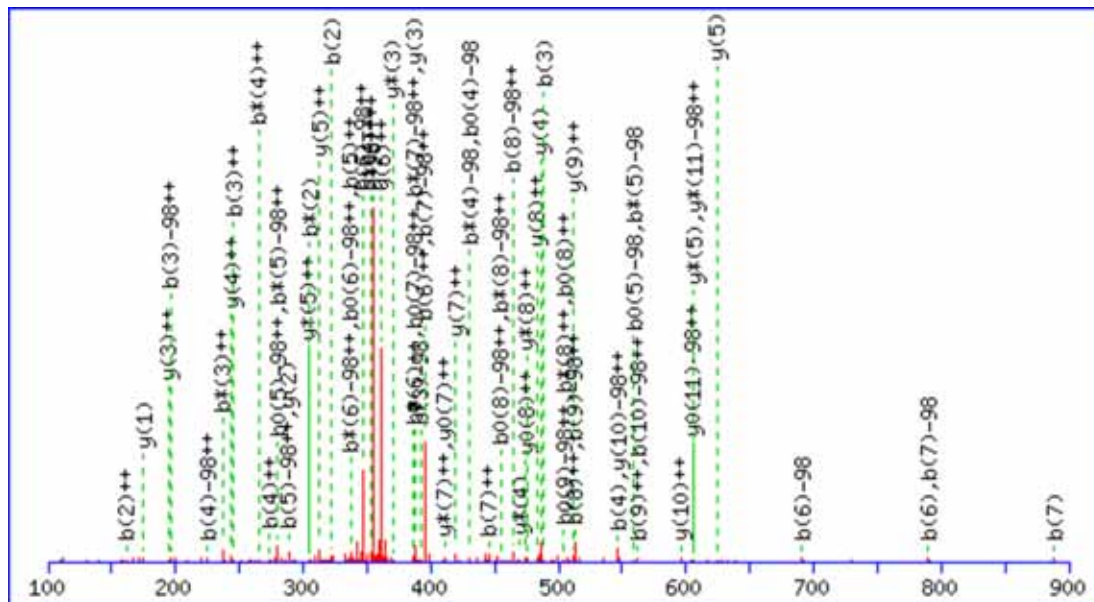

**Monoisotopic mass of neutral peptide Mr(calc):** 1509.7817

**Fixed modifications:** Carbamidomethyl (C) (apply to specified residues or termini only)

**Variable modifications:**

**N-term :** Dimethyl (N-term)

**S3 :** Phospho (ST), with neutral losses 97.9769(shown in table), 0.0000

**K12 :** Dimethyl (K)

**Ions Score:** 42 **Expect:** 0.0033

**Matched b ions:** b(2)++, b(2), b(3)-98++, b(3)++, b(3)-98, b(3), b(4), b(4)-98++, b(4)++, b(5)-98++, b(5)++, b(6)-98, b(6), b(6)++, b(6)-98++, b(7)-98, b(7), b(7)-98++, b(7)++, b(8)++, b(8)-98++, b(9)-98++, b(9)++, b(10)-98++

**Matched y ions:** y(1), y(2), y(3), y(3)++, y(4), y(4)++, y(5), y(5)++, y(6)++, y(7)++, y(8)++, y(9)++, y(10)-98++, y(10)++

**Precursor origin neutral loss:** +

## Peptide No.739

**RHSGQDVHVVLK**

**Confirmed sites:** @S:3

**Ambiguous sites:**

**MS/MS Fragmentation of RHSGQDVHVVLK**

Found in **NSF1C\_MOUSE**, NSFL1 cofactor p47 OS=Mus musculus GN=Nsf1c PE=1 SV=1

Match to Query 2037: 1521.846104 from(381.468802,4+)

Title: Elution from: 23.256 to 23.256 scan no 1253 cid35.00 polarity:+:MA10





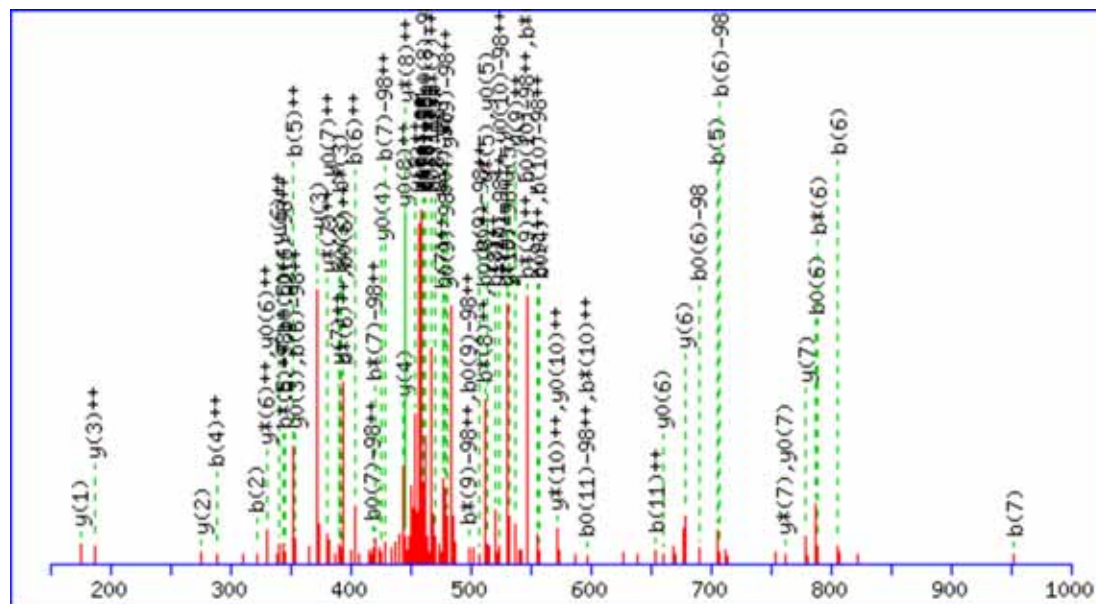

**Monoisotopic mass of neutral peptide Mr(calc):** 1482.6616

**Fixed modifications:** Carbamidomethyl (C) (apply to specified residues or termini only)

**Variable modifications:**

**N-term :** Dimethyl (N-term)

**S4 :** Phospho (ST), with neutral losses 0.0000(shown in table), 97.9769

**Ions Score:** 34 **Expect:** 0.014

**Matched b ions:** b(2), b(4)++, b(4)-98, b(5)++, b(5), b(6), b(6)-98++, b(6)-98, b(6)++, b(7), b(7)++, b(7)-98++, b(8)++, b(8)-98++, b(9)-98++, b(9)++, b(10)-98++, b(11)++

**Matched y ions:** y(1), y(2), y(3), y(3)++, y(4), y(5), y(6), y(6)++, y(7), y(7)++, y(8)++, y(9)++, y(10)-98++

**Precursor origin neutral loss:**

## Peptide No.741

**RKDSPPLVTPPQSPSSQPPAMTQAPR**

**Confirmed sites:** @S:4,@T:9,@S:13

**Ambiguous sites:**

**MS/MS Fragmentation of** **RKDSPPLVTPPQSPSSQPPAMTQAPR**

Found in **SMTL2\_MOUSE**, Smoothelin-like protein 2 OS=Mus musculus GN=Smtnl2 PE=1 SV=1

Match to Query 8669: 3178.437129 from(1060.486319,3+)

Title: Elution from: 37.593 to 37.593 scan no 3344 cid35.00 polarity:+:MA10:m1s



Match to Query 5522: 2269.037994 from(757.353274,3+)

Title: Elution from: 21.748 to 21.748 scan no 1114 cid35.00 polarity:+:MA10:m1s

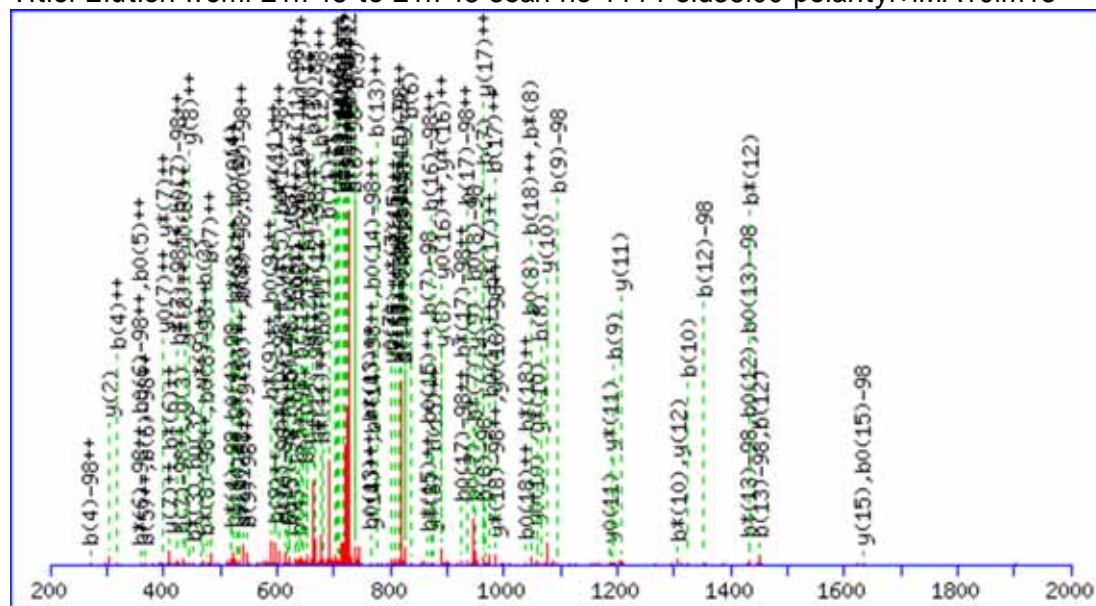

**Monoisotopic mass of neutral peptide Mr(calc):** 2269.0362

**Fixed modifications:** Carbamidomethyl (C) (apply to specified residues or termini only)

**Variable modifications:**

**N-term :** Dimethyl (N-term)

**K2 :** Dimethyl (K)

**S4 :** Phospho (ST), with neutral losses 0.0000(shown in table), 97.9769

**K19 :** Dimethyl (K)

**Ions Score:** 60 **Expect:** 7.9e-005

**Matched b ions:** b(3), b(4)-98, b(4)++, b(4)-98++, b(4), b(5)++, b(5)-98, b(5), b(6)-98++, b(6)-98, b(6), b(7)-98++, b(7)++, b(7), b(7)-98, b(8)++, b(8)-98, b(8), b(9)-98++, b(9)++, b(9), b(9)-98, b(10)++, b(10), b(10)-98++, b(11)++, b(11)-98++, b(12)++, b(12), b(12)-98++, b(12)-98, b(13)-98++, b(13)-98, b(13)++, b(14)++, b(15)-98++, b(15)++, b(16)-98++, b(17)++, b(17)-98++, b(18)++

**Matched y ions:** y(2), y(3), y(4), y(5), y(6), y(7)++, y(7), y(8), y(8)++, y(9), y(10)++, y(10), y(11), y(12), y(12)++, y(13)++, y(14)++, y(15), y(15)++, y(17)++

**Precursor origin neutral loss:** +

## Peptide No.743

**RKESTPETEEGAPTTSEEK**

**Confirmed sites:** @T:5

**Ambiguous sites:**

MS/MS Fragmentation of **RKESTPETEEGAPTTSEEK**

Found in **SMPX\_MOUSE**, Small muscular protein OS=Mus musculus GN=Smpx PE=2 SV=2

Match to Query 6125: 2269.038915 from(757.353581,3+)

Title: Elution from: 21.885 to 21.885 scan no 1096 cid35.00 polarity:+:MA10:m1s



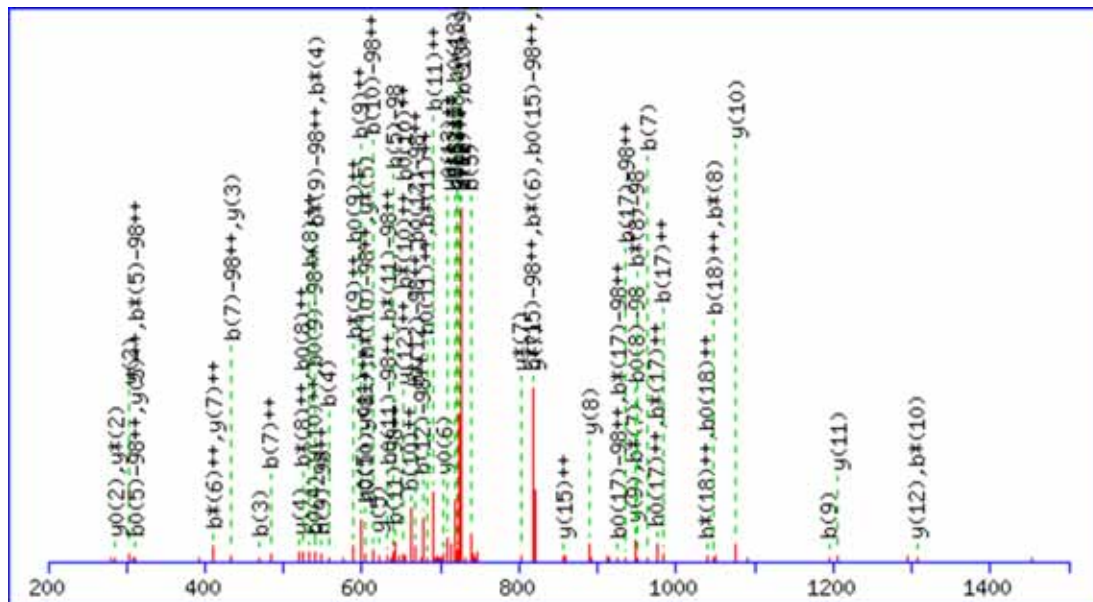

**Monoisotopic mass of neutral peptide Mr(calc):** 2269.0362

**Fixed modifications:** Carbamidomethyl (C) (apply to specified residues or termini only)

**Variable modifications:**

**N-term :** Dimethyl (N-term)

**K2 :** Dimethyl (K)

**T5 :** Phospho (ST), with neutral losses 0.0000(shown in table), 97.9769

**K19 :** Dimethyl (K)

**Ions Score:** 62 **Expect:** 4.3e-005

**Matched b ions:** b(3), b(4), b(5), b(5)-98, b(7)-98++, b(7)++, b(7), b(8)++, b(9)++, b(9), b(9)-98++, b(10)++, b(10)-98++, b(11)++, b(11)-98++, b(12)++, b(12)-98++, b(13)-98++, b(17)++, b(17)-98++, b(18)++

**Matched y ions:** y(2), y(3), y(4), y(5)++, y(5), y(6), y(7)++, y(7), y(8), y(9), y(10), y(10)++, y(11), y(11)++, y(12), y(12)++, y(13)++, y(15)++

**Precursor origin neutral loss:** +

## Peptide No.744

**RKESTPETEEGAPTTSEEK**

**Confirmed sites:** @S:4

**Ambiguous sites:**

MS/MS Fragmentation of **RKESTPETEEGAPTTSEEK**

Found in **SMPX\_MOUSE**, Small muscular protein OS=Mus musculus GN=Smpx PE=2 SV=2

Match to Query 5923: 2287.132788 from(763.384872,3+)

Title: Elution from: 21.720 to 21.720 scan no 1100 cid35.00 polarity:+:MA10:m1s

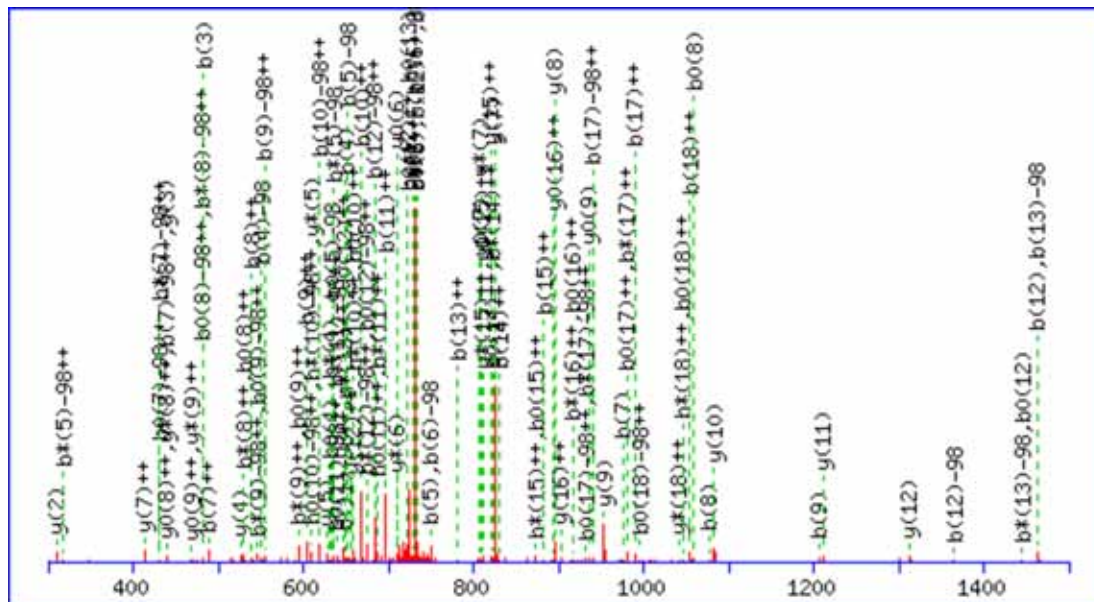

**Monoisotopic mass of neutral peptide Mr(calc):** 2287.1317

**Fixed modifications:** Carbamidomethyl (C) (apply to specified residues or termini only)

**Variable modifications:**

**N-term :** Dimethyl:2H(4)13C(2) (N-term)

**K2 :** Dimethyl:2H(4)13C(2) (K)

**S4 :** Phospho (ST), with neutral losses 97.9769(shown in table), 0.0000

**K19 :** Dimethyl:2H(4)13C(2) (K)

**Ions Score:** 45 **Expect:** 0.0026

**Matched b ions:** b(3), b(4)-98, b(4), b(5)-98, b(5), b(6)-98, b(7)++, b(7)-98++, b(7), b(8)++, b(8), b(9), b(9)-98++, b(9)++, b(10)++, b(10)-98++, b(11)++, b(11)-98++, b(12)++, b(12), b(12)-98++, b(12)-98, b(13)-98++, b(13)-98, b(13)++, b(14)++, b(15)++, b(17)++, b(17)-98++, b(18)++

**Matched y ions:** y(2), y(3), y(4), y(5), y(6), y(7)++, y(7), y(8), y(9), y(10), y(11), y(12), y(12)++, y(15)++, y(16)++

**Precursor origin neutral loss:** +

## Peptide No.745

**RKESTPETEEGAPTTSEEK**

**Confirmed sites: @T:5**

**Ambiguous sites:**

MS/MS Fragmentation of **RKESTPETEEGAPTTSEEK**

Found in **SMPX\_MOUSE**, Small muscular protein OS=Mus musculus GN=Smpx PE=2 SV=2

Match to Query 5574: 2287.133082 from(763.384970,3+)

Title: Elution from: 21.698 to 21.698 scan no 1108 cid35.00 polarity:+:MA10:m1s

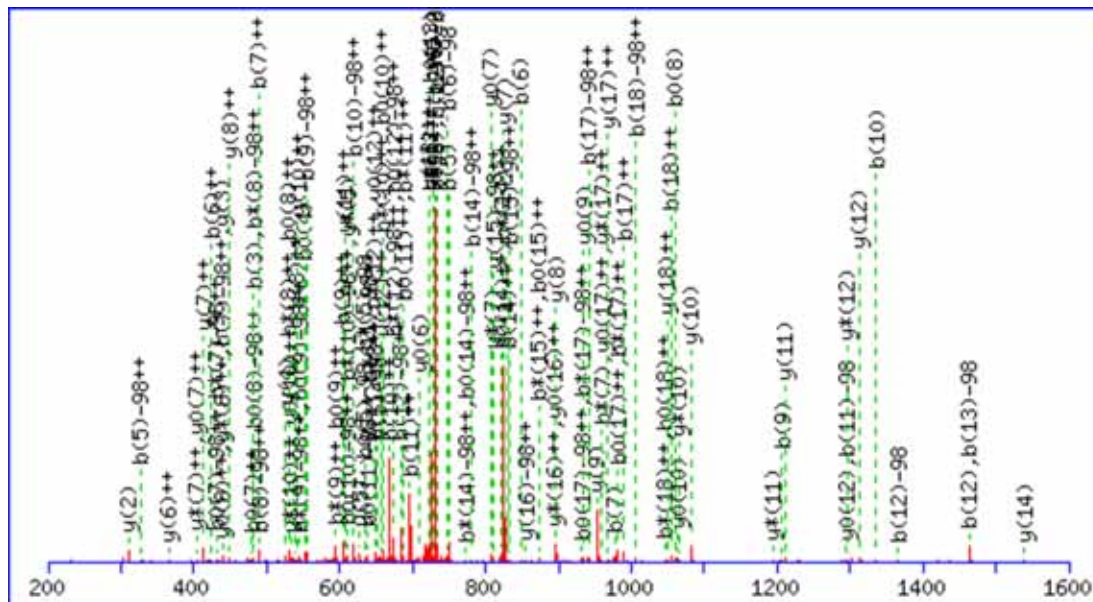

**Monoisotopic mass of neutral peptide Mr(calc): 2287.1317**

**Fixed modifications:** Carbamidomethyl (C) (apply to specified residues or termini only)

**Variable modifications:**

**N-term :** Dimethyl:2H(4)13C(2) (N-term)

**K2 :** Dimethyl:2H(4)13C(2) (K)

**T5 :** Phospho (ST), with neutral losses 97.9769(shown in table), 0.0000

**K19 :** Dimethyl:2H(4)13C(2) (K)

**Ions Score: 54 Expect: 0.0003**

**Matched b ions:** b(3), b(5)-98++, b(5), b(5)-98, b(6)++, b(6), b(6)-98, b(7)++, b(7)-98++, b(7), b(8)-98++, b(8)++, b(9)++, b(9), b(9)-98++, b(10)-98++, b(10), b(10)++, b(11)-98, b(11)++, b(11)-98++, b(12)++, b(12), b(12)-98, b(12)-98++, b(13)-98++, b(13)-98, b(14)-98++, b(14)++, b(15)-98++, b(17)++, b(17)-98++, b(18)++, b(18)-98++

**Matched y ions:** y(2), y(3), y(4), y(5), y(6)++, y(6), y(7)++, y(7), y(8), y(8)++, y(9), y(10), y(10)++, y(11), y(11)++, y(12), y(12)++, y(13)++, y(14), y(15)-98++, y(16)-98++, y(17)++, y(18)++

**Precursor origin neutral loss:** +

## Peptide No.746

**RKSEPAVGPLR**

**Confirmed sites: @S:3**

**Ambiguous sites:**

**MS/MS Fragmentation of RKSEPAVGPLR**

Found in **SRBS2\_MOUSE**, Sorbin and SH3 domain-containing protein 2 OS=Mus musculus GN=Sorbs2 PE=1 SV=2

Match to Query 1523: 1344.728604 from(449.250144,3+)

Title: Elution from: 24.049 to 24.049 scan no 1358 cid35.00 polarity:+:MA10

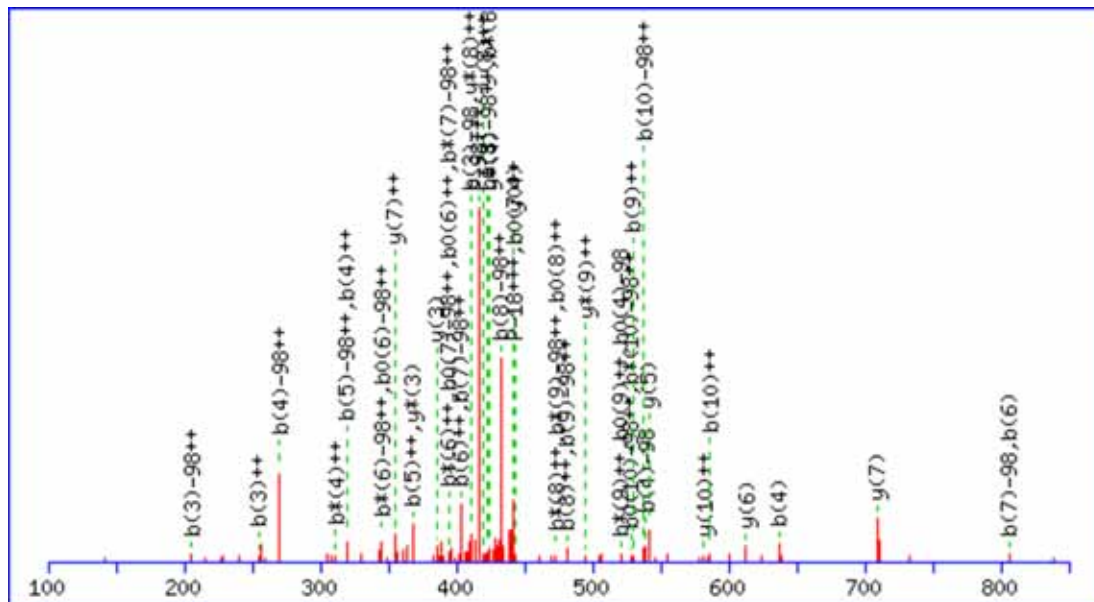

**Monoisotopic mass of neutral peptide Mr(calc):** 1344.7278

**Fixed modifications:** Carbamidomethyl (C) (apply to specified residues or termini only)

**Variable modifications:**

**N-term :** Dimethyl (N-term)

**K2 :** Dimethyl (K)

**S3 :** Phospho (ST), with neutral losses 97.9769(shown in table), 0.0000

**Ions Score:** 44 **Expect:** 0.0019

**Matched b ions:** b(3)-98++, b(3)++, b(3)-98, b(4)-98++, b(4)++, b(4)-98, b(4), b(5)-98++, b(5)++, b(6), b(6)++, b(7)-98, b(7)-98++, b(8)-98++, b(8)++, b(9)-98++, b(9)++, b(10)-98++, b(10)++

**Matched y ions:** y(3), y(4), y(5), y(6), y(7), y(7)++, y(8)++, y(10)++

**Precursor origin neutral loss:** +

## Peptide No.747

**RKSEPAVGPLR**

**Confirmed sites:** @S:3

**Ambiguous sites:**

**MS/MS Fragmentation of** **RKSEPAVGPLR**

Found in **SRBS2\_MOUSE**, Sorbin and SH3 domain-containing protein 2 OS=Mus musculus GN=Sorbs2 PE=1 SV=2

Match to Query 1456: 1356.791193 from(453.271007,3+)

Title: Elution from: 23.860 to 23.860 scan no 1367 cid35.00 polarity:+MA10



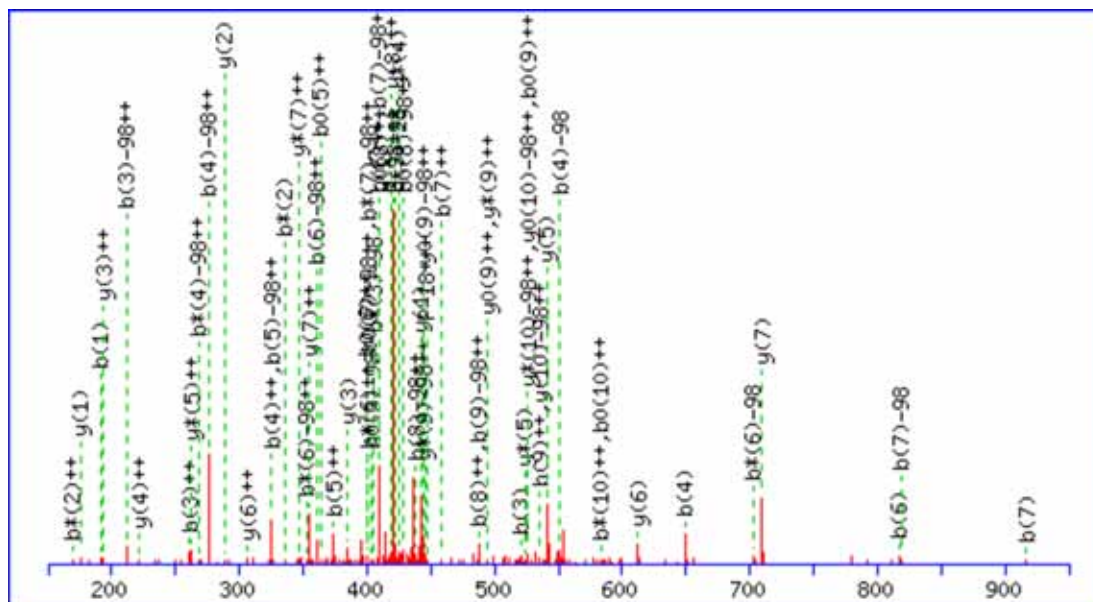

**Monoisotopic mass of neutral peptide Mr(calc):** 1356.7915

**Fixed modifications:** Carbamidomethyl (C) (apply to specified residues or termini only)

**Variable modifications:**

**N-term :** Dimethyl:2H(4)13C(2) (N-term)

**K2 :** Dimethyl:2H(4)13C(2) (K)

**S3 :** Phospho (ST), with neutral losses 97.9769(shown in table), 0.0000

**Ions Score:** 31 **Expect:** 0.022

**Matched b ions:** b(1), b(3)-98++, b(3)++, b(3)-98, b(3), b(4)-98++, b(4), b(4)++, b(4)-98, b(5)-98++, b(5)++, b(6)++, b(6), b(6)-98++, b(7), b(7)-98++, b(7)-98, b(7)++, b(8)++, b(8)-98++, b(9)-98++, b(9)++  
**Matched y ions:** y(1), y(2), y(3)++, y(3), y(4), y(4)++, y(5), y(6), y(6)++, y(7), y(7)++, y(8)++, y(10)-98++  
**Precursor origin neutral loss:** +

## Peptide No.748

**RLSSTSDIEEK**

**Confirmed sites:** @S:3,@S:6

**Ambiguous sites:**

MS/MS Fragmentation of **RLSSTSDIEEK**

Found in **MYPT2\_MOUSE**, Protein phosphatase 1 regulatory subunit 12B OS=Mus musculus  
 GN=Ppp1r12b PE=1 SV=2

Match to Query 2334: 1479.626122 from(740.820337,2+)

Title: Elution from: 29.620 to 29.620 scan no 2253 cid35.00 polarity:+MA10

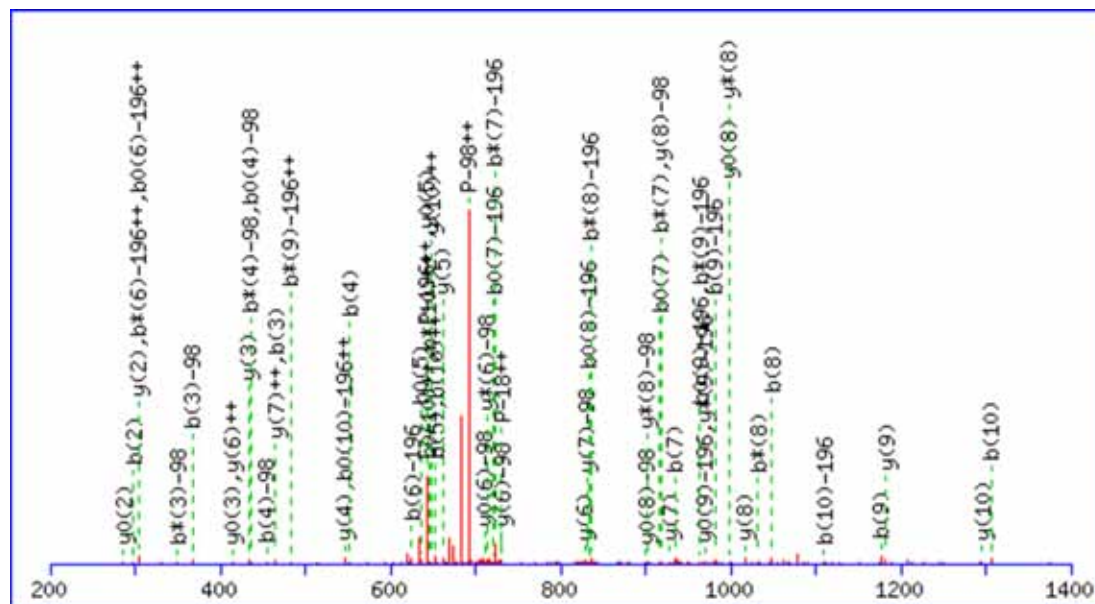

**Monoisotopic mass of neutral peptide Mr(calc):** 1479.6259

**Fixed modifications:** Carbamidomethyl (C) (apply to specified residues or termini only)

**Variable modifications:**

**N-term :** Dimethyl (N-term)

**S3 :** Phospho (ST), with neutral losses 0.0000(shown in table), 97.9769

**S6 :** Phospho (ST), with neutral losses 0.0000(shown in table), 97.9769

**K11 :** Dimethyl (K)

**Ions Score:** 39 **Expect:** 0.0029

**Matched b ions:** b(2), b(3)-98, b(3), b(4)-98, b(4), b(5), b(6)-98, b(6)-196, b(7)-98, b(7), b(8), b(8)-98, b(9)-98, b(9), b(9)-196, b(10)-98, b(10), b(10)-196, b(10)-98++, b(10)++

**Matched y ions:** y(2), y(3), y(4), y(5), y(6), y(6)++, y(6)-98, y(7)++, y(7)-98, y(7), y(8), y(8)-98, y(9), y(9)-98, y(10), y(10)++

**Precursor origin neutral loss:** +

## Peptide No.749

**RLSTQFENLMAESR**

**Confirmed sites:** @T:4

**Ambiguous sites:**

**MS/MS Fragmentation of RLSTQFENLMAESR**

Found in **SYNCI\_MOUSE**, Syncoilin OS=Mus musculus GN=Sync PE=1 SV=1

Match to Query 4360: 1804.818690 from(602.613506,3+)

Title: Elution from: 41.870 to 41.870 scan no 3913 cid35.00 polarity:+:MA10

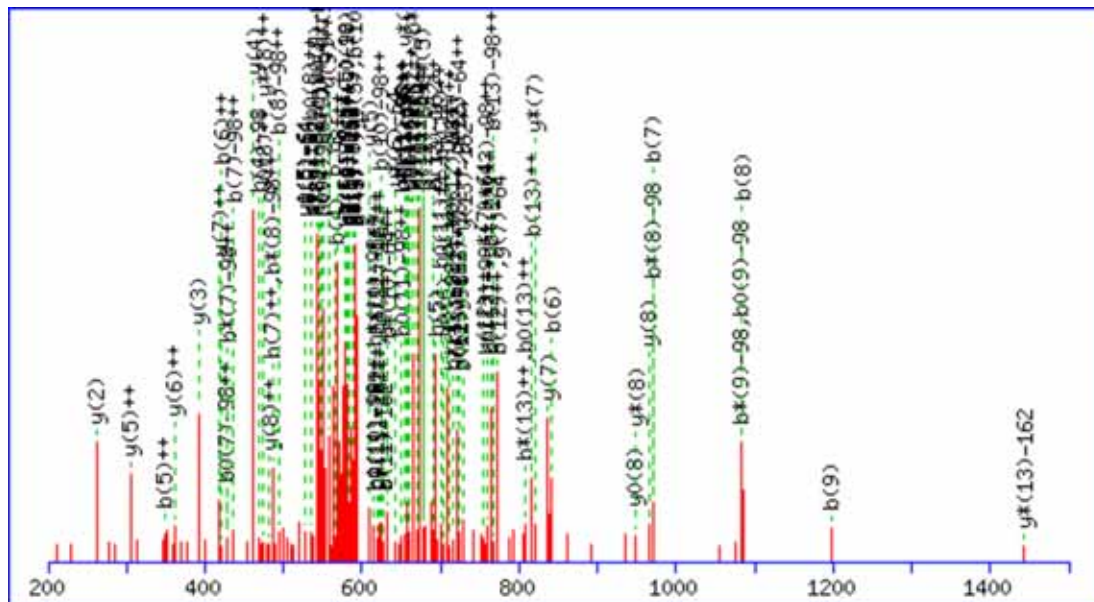

**Monoisotopic mass of neutral peptide Mr(calc):** 1804.8179

**Fixed modifications:** Carbamidomethyl (C) (apply to specified residues or termini only)

**Variable modifications:**

**N-term :** Dimethyl (N-term)

**T4 :** Phospho (ST), with neutral losses 0.0000(shown in table), 97.9769

**M10 :** Oxidation (M), with neutral losses 0.0000(shown in table), 63.9983

**Ions Score:** 45 **Expect:** 0.0018

**Matched b ions:** b(4)-98, b(4), b(5), b(5)++, b(6), b(6)++, b(7), b(7)++, b(7)-98++, b(8)++, b(8), b(8)-98++, b(9), b(9)-98++, b(10)++, b(10)-98++, b(11)++, b(11)-98++, b(12)++, b(12)-98++, b(13)++, b(13)-98++

**Matched y ions:** y(2), y(3), y(4), y(5)++, y(5), y(6)++, y(6), y(7), y(7)++, y(8), y(8)++, y(9)++, y(11)++, y(12)++

**Precursor origin neutral loss:** +

## Peptide No.750

**RLSTQFENLMAESR**

**Confirmed sites:** @T:4

**Ambiguous sites:**

**MS/MS Fragmentation of RLSTQFENLMAESR**

Found in **SYNCI\_MOUSE**, Syncoilin OS=Mus musculus GN=Sync PE=1 SV=1

Match to Query 3828: 1810.850778 from(604.624202,3+)

Title: Elution from: 41.512 to 41.512 scan no 3708 cid35.00 polarity:+:MA10:m1s







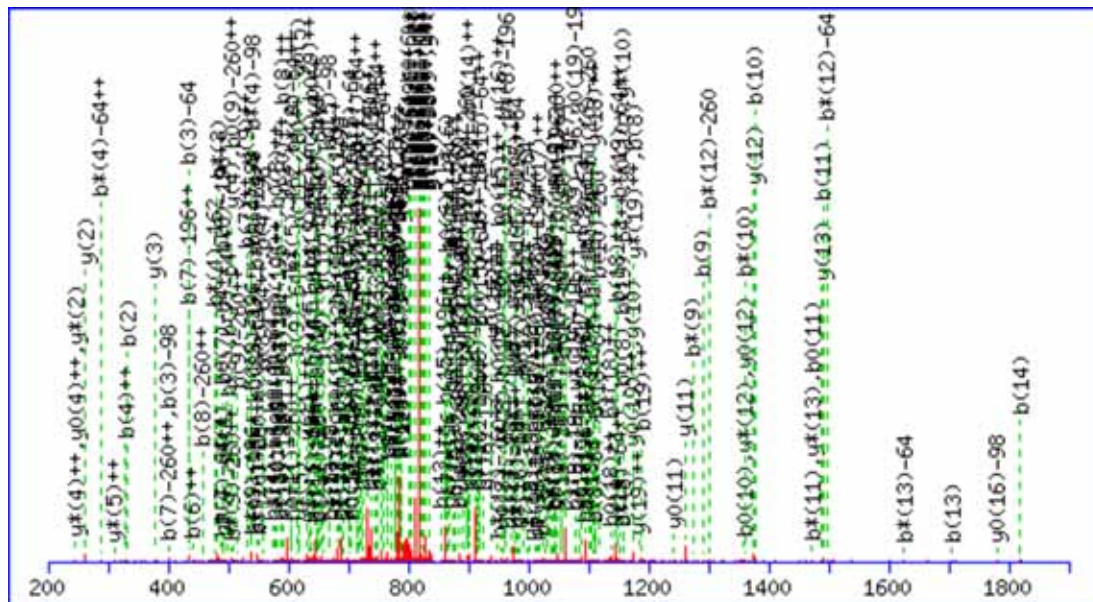

**Monoisotopic mass of neutral peptide Mr(calc):** 2550.0710

**Fixed modifications:** Carbamidomethyl (C) (apply to specified residues or termini only)

**Variable modifications:**

**N-term :** Dimethyl (N-term)

**M2 :** Oxidation (M), with neutral losses 0.0000(shown in table), 63.9983

**S3 :** Phospho (ST), with neutral losses 0.0000(shown in table), 97.9769

**T7 :** Phospho (ST), with neutral losses 0.0000(shown in table), 97.9769

**Ions Score:** 46 **Expect:** 0.0014

**Matched b ions:** b(2), b(3)-98, b(3), b(4)++, b(4)-98, b(4), b(5), b(5)-98, b(6)++, b(6)-98, b(7)-196++, b(7)-98++, b(7), b(7)-98, b(7)++, b(7)-196, b(8)-98++, b(8), b(8)-196++, b(8)++, b(8)-196, b(8)-98, b(9)-98++, b(9)-196++, b(9), b(9)++, b(9)-196, b(9)-98, b(10), b(10)-98++, b(10)-196++, b(10)++, b(10)-98, b(11), b(11)-196++, b(11)-98++, b(11)++, b(12)-196++, b(12)-98++, b(12)++, b(13), b(13)++, b(13)-196++, b(13)-98++, b(14)++, b(14)-98++, b(14), b(14)-196++, b(15)-98++, b(15)-196++, b(15)++, b(16)-98++, b(16)++, b(16)-196++, b(17)++, b(17)-98++, b(17)-196++, b(18)++, b(18)-98++, b(18)-196++, b(19)++, b(19)-98++

**Matched y ions:** y(2), y(3), y(4), y(5), y(6), y(8), y(9), y(9)++, y(10), y(10)++, y(11), y(11)++, y(12), y(12)++, y(13), y(13)++, y(14)-98++, y(14)++, y(15)++, y(15)-98++, y(16)-98++, y(16)++, y(17)++, y(18)-98++, y(18)-196++, y(18)++, y(19)-196++, y(19)++

**Precursor origin neutral loss:** +

## Peptide No.753

**RMSREPTLDSISELPEEDSR**

**Confirmed sites:** @S:3,@T:7,@S:10

**Ambiguous sites:**

MS/MS Fragmentation of **RMSREPTLDSISELPEEDSR**

Found in **OBSCN\_MOUSE**, Obscurin OS=Mus musculus GN=Obscn PE=2 SV=2

Match to Query 6892: 2630.040498 from(877.687442,3+)

Title: Elution from: 49.005 to 49.005 scan no 4614 cid35.00 polarity:+:MA10:m1s

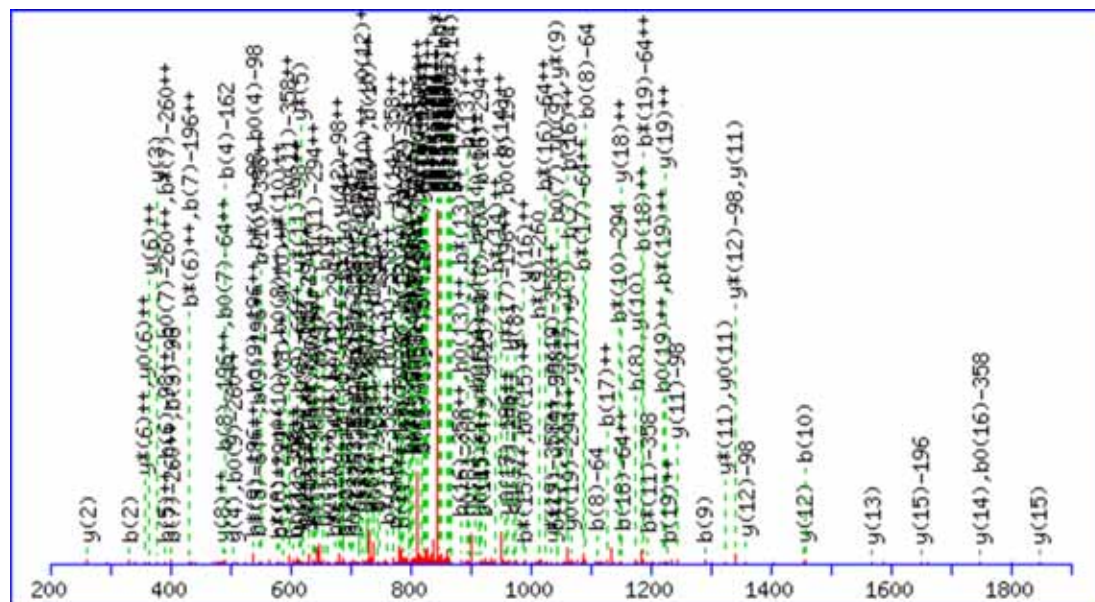

**Monoisotopic mass of neutral peptide Mr(calc):** 2630.0373

**Fixed modifications:** Carbamidomethyl (C) (apply to specified residues or termini only)

**Variable modifications:**

**N-term :** Dimethyl (N-term)

**M2 :** Oxidation (M), with neutral losses 0.0000(shown in table), 63.9983

**S3 :** Phospho (ST), with neutral losses 0.0000(shown in table), 97.9769

**T7 :** Phospho (ST), with neutral losses 0.0000(shown in table), 97.9769

**S10 :** Phospho (ST), with neutral losses 0.0000(shown in table), 97.9769

**Ions Score:** 77 **Expect:** 7.4e-007

**Matched b ions:** b(2), b(3)-98, b(4), b(5)++, b(5), b(5)-98, b(6)-98++, b(6)-98, b(7), b(7)-196++, b(7)-98, b(7)-196, b(7)-98++, b(8)-98++, b(8)-196++, b(8), b(8)++, b(9)++, b(9), b(9)-98++, b(9)-196++, b(10), b(10)-98++, b(10)-196++, b(10)-98, b(10)-294++, b(10)++, b(11)-98++, b(11)-196++, b(11)-294++, b(11)++, b(12)-98++, b(12)++, b(13)-98++, b(13)-294++, b(13)-196++, b(13)++, b(14)++, b(14)-98++, b(14)-98, b(14)-196++, b(14)-294++, b(15)-98++, b(15)-196++, b(15)-294++, b(16)-98++, b(16)-294++, b(16)++, b(17)-98++, b(17)++, b(18)-98++, b(18)++, b(18)-196++, b(19)++

**Matched y ions:** y(2), y(3), y(4), y(6), y(6)++, y(7), y(8), y(8)++, y(9), y(10), y(10)++, y(11), y(11)-98, y(11)-98++, y(12), y(12)-98++, y(12)-98, y(12)++, y(13), y(13)-98++, y(13)++, y(14), y(14)-98++, y(15), y(15)-98, y(15)-196, y(15)++, y(15)-196++, y(16)++, y(17)-98++, y(17)++, y(18)++, y(19)-98++, y(19)++

**Precursor origin neutral loss:** +

## Peptide No.754

**RMSREPTLDSISELPEEDSR**

**Confirmed sites:** @T:7

**Ambiguous sites:**

MS/MS Fragmentation of **RMSREPTLDSISELPEEDSR**

Found in **OBSCN\_MOUSE**, Obscurin OS=Mus musculus GN=Obscn PE=2 SV=2

Match to Query 6444: 2470.107438 from(824.376422,3+)

Title: Elution from: 44.085 to 44.085 scan no 4004 cid35.00 polarity:+:MA10:m1s



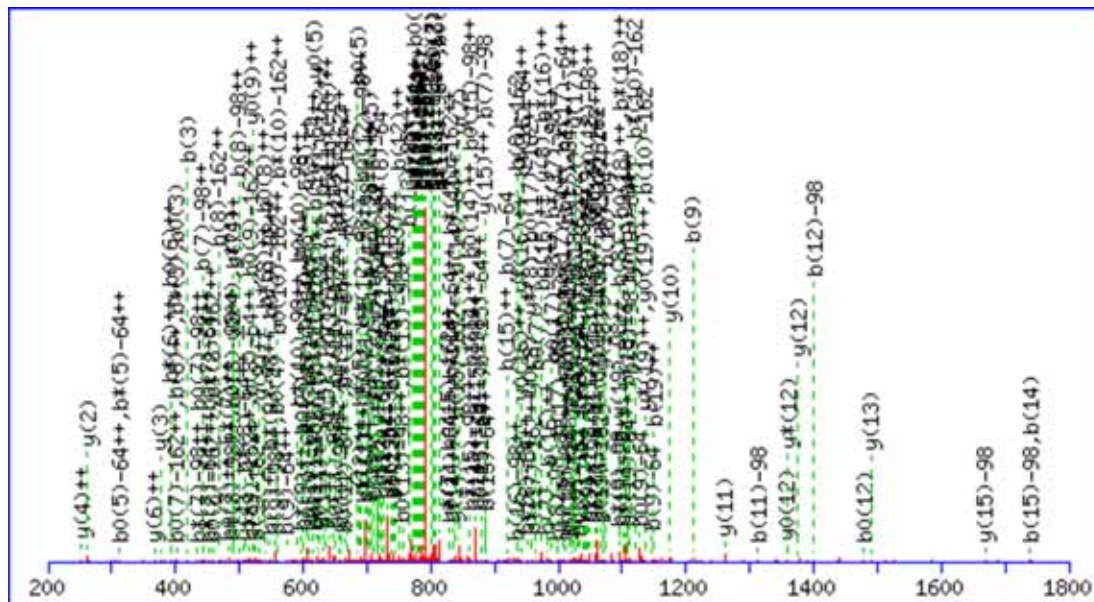

**Monoisotopic mass of neutral peptide Mr(calc):** 2470.1046

**Fixed modifications:** Carbamidomethyl (C) (apply to specified residues or termini only)

**Variable modifications:**

**N-term :** Dimethyl (N-term)

**M2 :** Oxidation (M), with neutral losses 0.0000(shown in table), 63.9983

**T7 :** Phospho (ST), with neutral losses 0.0000(shown in table), 97.9769

**Ions Score:** 50 **Expect:** 0.00082

**Matched b ions:** b(3), b(5), b(6)++, b(6), b(7)-98++, b(7)++, b(7)-98, b(7), b(8)++, b(8)-98++, b(8)-98, b(8), b(9), b(9)++, b(9)-98++, b(9)-98, b(10)++, b(10)-98++, b(11)-98, b(11)++, b(11)-98++, b(12)-98, b(12)++, b(12)-98++, b(13)++, b(13)-98++, b(14)++, b(14), b(15)-98++, b(15)-98, b(15)++, b(16)-98++, b(16)++, b(17)++, b(17)-98++, b(18)++, b(18)-98++, b(19)-98++, b(19)++

**Matched y ions:** y(2), y(3), y(4)++, y(4), y(5), y(6), y(6)++, y(7), y(8), y(9), y(9)++, y(10), y(11), y(11)++, y(12), y(12)++, y(13), y(13)++, y(14)-98++, y(14)++, y(15)-98, y(15)++, y(17)++, y(18)-98++, y(18)++, y(19)-98++

**Precursor origin neutral loss:** +

## Peptide No.755

**RMSREPTLDSISELPEEDSR**

**Confirmed sites:** @S:3

**Ambiguous sites:**

MS/MS Fragmentation of **RMSREPTLDSISELPEEDSR**

Found in **OBSCN\_MOUSE**, Obscurin OS=Mus musculus GN=Obscn PE=2 SV=2

Match to Query 6215: 2454.111171 from(819.044333,3+)

Title: Elution from: 46.575 to 46.575 scan no 4278 cid35.00 polarity:+:MA10:m1s





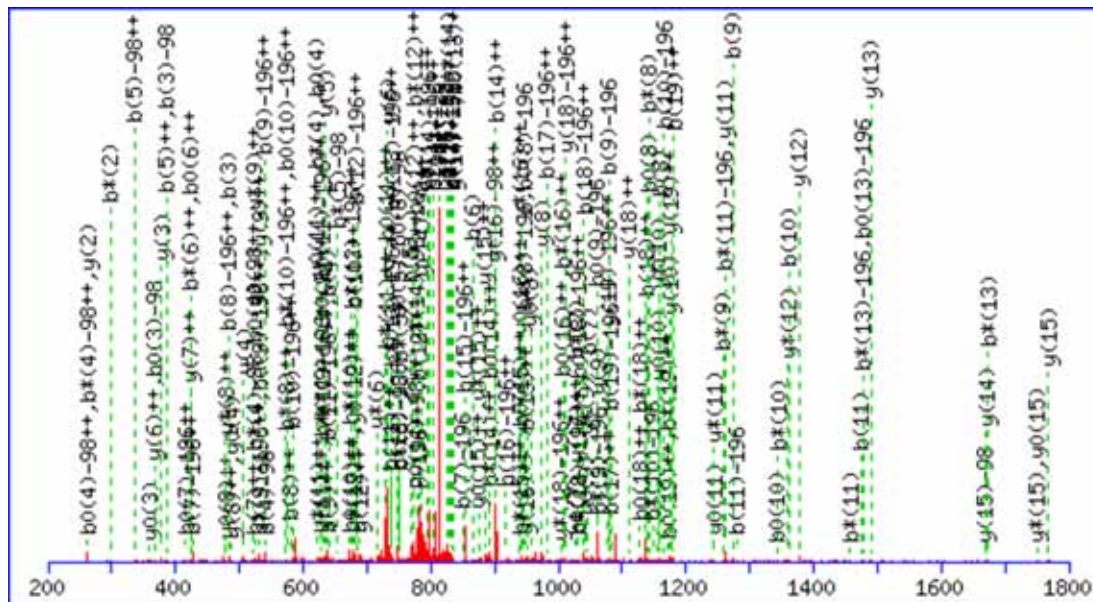

**Monoisotopic mass of neutral peptide Mr(calc):** 2534.0761

**Fixed modifications:** Carbamidomethyl (C) (apply to specified residues or termini only)

**Variable modifications:**

**N-term :** Dimethyl (N-term)

**S3 :** Phospho (ST), with neutral losses 0.0000(shown in table), 97.9769

**T7 :** Phospho (ST), with neutral losses 0.0000(shown in table), 97.9769

**Ions Score:** 50 **Expect:** 0.00071

**Matched b ions:** b(3), b(3)-98, b(4)-98, b(4), b(5)-98++, b(5)++, b(5), b(6), b(7)-196++, b(7)-98++, b(7)++, b(7)-196, b(7)-98, b(7), b(8)-98, b(8)-98++, b(8)-196++, b(8)++, b(8), b(9)-196++, b(9)-98++, b(9)++, b(9), b(9)-98, b(9)-196, b(10)-98++, b(10)-196++, b(10)++, b(10)-196, b(10), b(11)-98, b(11)-196, b(11)-196++, b(11)-98++, b(11)++, b(11), b(12)-98++, b(12)++, b(12)-196++, b(13)-196++, b(13)-98++, b(14)++, b(14)-98++, b(14)-196++, b(15)-98++, b(15)++, b(15)-196++, b(16)-196++, b(16)-98++, b(17)++, b(17)-196++, b(17)-98++, b(18)-98++, b(18)-196++, b(18)++, b(19)++, b(19)-196++, b(19)-98++

**Matched y ions:** y(2), y(3), y(4), y(5), y(6), y(6)++, y(7)++, y(8), y(8)++, y(9), y(9)++, y(10), y(11), y(11)++, y(12), y(12)++, y(13), y(14), y(14)-98++, y(14)++, y(15)-98, y(15), y(15)++, y(15)-98++, y(16)-98++, y(16)++, y(17)++, y(18)-98++, y(18)-196++, y(18)++, y(19)++, y(19)-196++, y(19)-98++

**Precursor origin neutral loss:** +

## Peptide No.757

**RMSREPTLDSISELPEEDSR**

**Confirmed sites:** @T:7

**Ambiguous sites:**

MS/MS Fragmentation of **RMSREPTLDSISELPEEDSR**

Found in **OBSCN\_MOUSE**, Obscurin OS=Mus musculus GN=Obscn PE=2 SV=2

Match to Query 7399: 2454.109824 from(819.043884,3+)

Title: Elution from: 46.654 to 46.654 scan no 4502 cid35.00 polarity:+:MA10:m1s

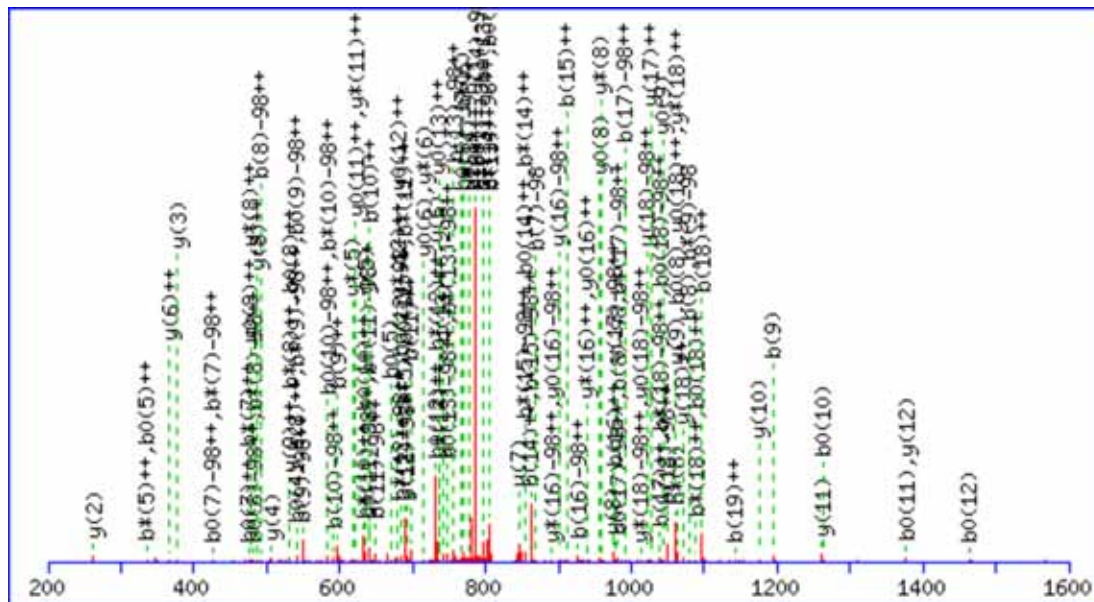

**Monoisotopic mass of neutral peptide Mr(calc):** 2454.1097

**Fixed modifications:** Carbamidomethyl (C) (apply to specified residues or termini only)

**Variable modifications:**

**N-term :** Dimethyl (N-term)

**T7 :** Phospho (ST), with neutral losses 0.0000(shown in table), 97.9769

**Ions Score:** 53 **Expect:** 0.00039

**Matched b ions:** b(5), b(6), b(7)-98, b(8)++, b(8)-98++, b(8), b(8)-98, b(9)-98++, b(9)++, b(9), b(10)++, b(10)-98++, b(11)-98++, b(11)++, b(12)++, b(12)-98++, b(13)++, b(13)-98++, b(14)++, b(15)-98++, b(15)++, b(16)-98++, b(16)++, b(17)++, b(17)-98++, b(18)++, b(18)-98++, b(19)++

**Matched y ions:** y(2), y(3), y(4), y(5), y(6), y(6)++, y(7), y(8), y(8)++, y(9), y(9)++, y(10), y(11), y(12), y(12)++, y(14)-98++, y(16)-98++, y(17)-98++, y(17)++, y(18)++, y(18)-98++

**Precursor origin neutral loss:** +

## Peptide No.758

**RMSREPTLDSISELPEEDSR**

**Confirmed sites:** @S:3

**Ambiguous sites:**

MS/MS Fragmentation of **RMSREPTLDSISELPEEDSR**

Found in **OBSCN\_MOUSE**, Obscurin OS=Mus musculus GN=Obscn PE=2 SV=2

Match to Query 6664: 2476.138914 from(826.386914,3+)

Title: Elution from: 44.123 to 44.123 scan no 4032 cid35.00 polarity:+:MA10:m1s



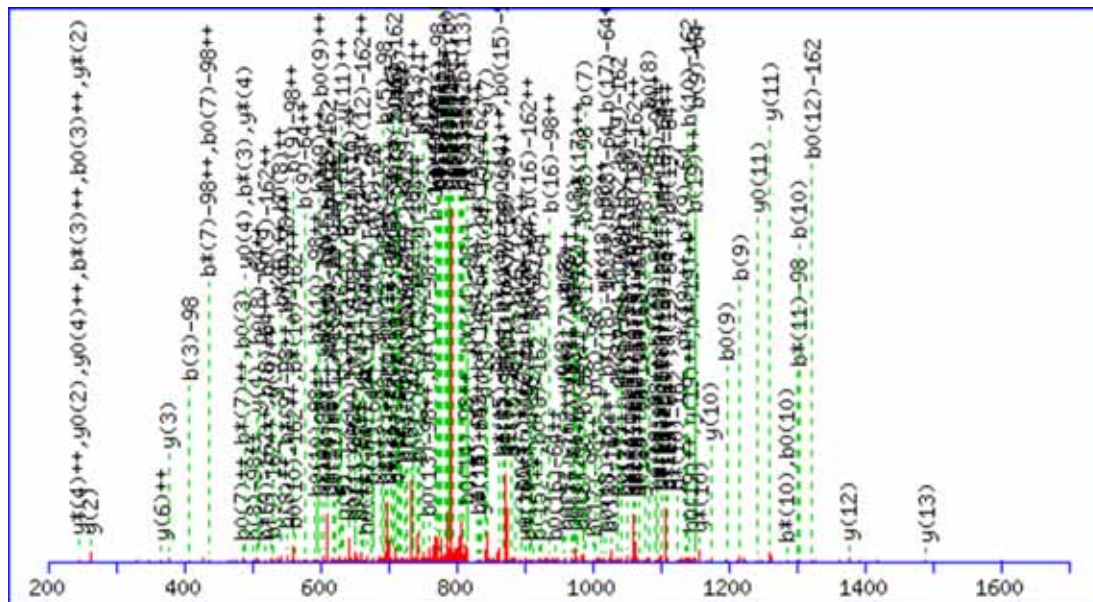

**Monoisotopic mass of neutral peptide Mr(calc):** 2476.1365

**Fixed modifications:** Carbamidomethyl (C) (apply to specified residues or termini only)

**Variable modifications:**

**N-term :** Dimethyl:2H(4)13C(2) (N-term)

**M2 :** Oxidation (M), with neutral losses 0.0000(shown in table), 63.9983

**S3 :** Phospho (ST), with neutral losses 0.0000(shown in table), 97.9769

**Ions Score:** 42 **Expect:** 0.0057

**Matched b ions:** b(3)-98, b(4), b(5)-98, b(5), b(6)-98, b(6), b(7), b(8)++, b(8)-98, b(8), b(9)++, b(9), b(9)-98, b(10)-98, b(10)++, b(10)++, b(11)++, b(11)-98, b(12)-98, b(12)++, b(13)-98, b(13)++, b(14)++, b(15)-98, b(15)++, b(16)++, b(16)-98, b(17)++, b(17)-98, b(18)++, b(18)-98, b(19)++, b(19)-98

**Matched y ions:** y(2), y(3), y(4), y(5), y(6), y(6)++, y(7), y(8), y(9), y(9)++, y(10), y(11), y(11)++, y(12), y(12)++, y(13), y(13)++, y(14)++, y(16)++, y(17)++, y(18)++, y(19)++, y(19)-98

**Precursor origin neutral loss:** +

## Peptide No.759

**RMSREPTLDSISELPEEDSR**

**Confirmed sites:** @S:3,@T:7

**Ambiguous sites:**

MS/MS Fragmentation of **RMSREPTLDSISELPEEDSR**

Found in **OBSCN\_MOUSE**, Obscurin OS=Mus musculus GN=Obscn PE=2 SV=2

Match to Query 6085: 2556.107496 from(853.043108,3+)

Title: Elution from: 46.410 to 46.410 scan no 4163 cid35.00 polarity:+:MA10:m1s



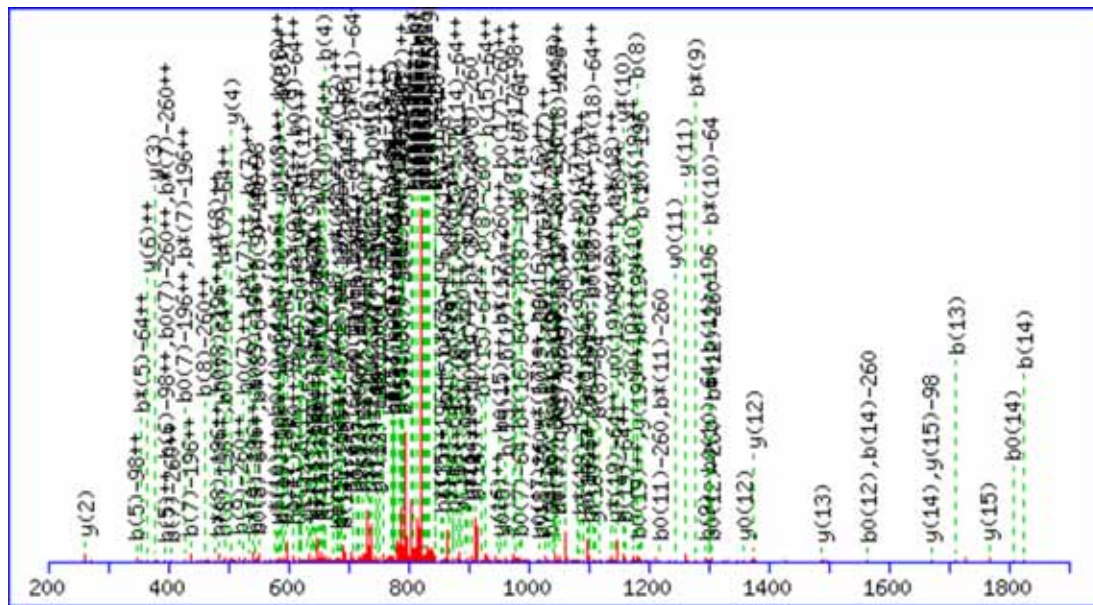

**Monoisotopic mass of neutral peptide Mr(calc):** 2556.1028

**Fixed modifications:** Carbamidomethyl (C) (apply to specified residues or termini only)

**Variable modifications:**

**N-term :** Dimethyl:2H(4)13C(2) (N-term)

**M2 :** Oxidation (M), with neutral losses 0.0000(shown in table), 63.9983

**S3 :** Phospho (ST), with neutral losses 0.0000(shown in table), 97.9769

**T7 :** Phospho (ST), with neutral losses 0.0000(shown in table), 97.9769

**Ions Score:** 54 **Expect:** 0.00028

**Matched b ions:** b(4), b(5)-98++, b(5)++, b(5)-98, b(5), b(6)-98++, b(6)-98, b(7)-196++, b(7)-98++, b(7)++, b(7)-98, b(8)-98++, b(8), b(8)-196++, b(8)++, b(8)-196, b(9)++, b(9)-196++, b(9)-98++, b(9), b(9)-196, b(9)-98, b(10)-196, b(10)-196++, b(10)-98++, b(10)++, b(11)-196, b(11)-196++, b(11)-98++, b(11)++, b(12)-196++, b(12)-98++, b(12)++, b(13), b(13)-196++, b(13)-98++, b(13)++, b(14)++, b(14)-98, b(14), b(14)-98++, b(14)-196++, b(15)-98++, b(15)-196++, b(15)++, b(16)++, b(16)-98++, b(17)-98++, b(17)++, b(18)-98++, b(18)++, b(18)-196++, b(19)-98++

**Matched y ions:** y(2), y(3), y(4), y(5), y(6), y(6)++, y(7), y(8), y(9), y(10), y(10)++, y(11), y(11)++, y(12), y(12)++, y(13), y(13)++, y(14), y(14)-98++, y(14)++, y(15)-98, y(15), y(15)++, y(15)-98++, y(16)-98++, y(16)++, y(17)++, y(17)-98++, y(18)-98++, y(18)++, y(19)++, y(19)-98++

**Precursor origin neutral loss:** +

## Peptide No.760

**RMSREPTLDSISELPEEDSR**

**Confirmed sites:** @S:3,@T:7,@S:10

**Ambiguous sites:**

MS/MS Fragmentation of **RMSREPTLDSISELPEEDSR**

Found in **OBSCN\_MOUSE**, Obscurin OS=Mus musculus GN=Obscn PE=2 SV=2

Match to Query 7089: 2636.070168 from(879.697332,3+)

Title: Elution from: 48.984 to 48.984 scan no 4632 cid35.00 polarity:+:MA10:m1s

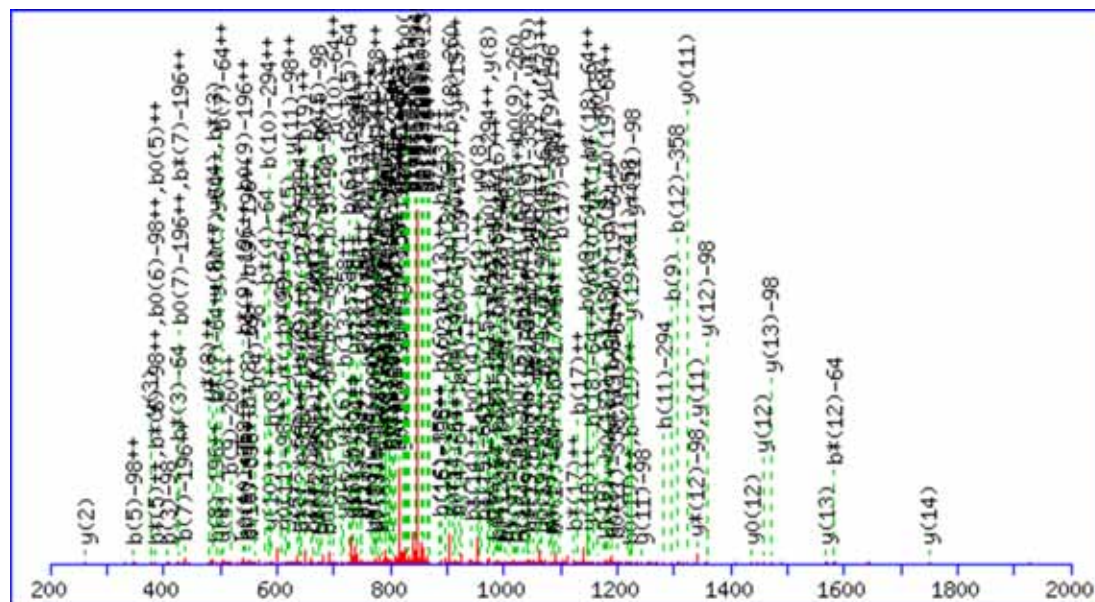

**Monoisotopic mass of neutral peptide Mr(calc):** 2636.0691

**Fixed modifications:** Carbamidomethyl (C) (apply to specified residues or termini only)

**Variable modifications:**

**N-term :** Dimethyl:2H(4)13C(2) (N-term)

**M2 :** Oxidation (M), with neutral losses 0.0000(shown in table), 63.9983

**S3 :** Phospho (ST), with neutral losses 0.0000(shown in table), 97.9769

**T7 :** Phospho (ST), with neutral losses 0.0000(shown in table), 97.9769

**S10 :** Phospho (ST), with neutral losses 0.0000(shown in table), 97.9769

**Ions Score:** 34 **Expect:** 0.016

**Matched b ions:** b(3)-98, b(4), b(4)-98, b(5)-98++, b(5), b(5)-98, b(6)-98, b(6), b(7)-196++, b(7)-98++, b(7)-98, b(7), b(8)-98++, b(8)++, b(8)-196++, b(8)-196, b(8)-98, b(8), b(9)-98++, b(9)-196++, b(9)++, b(9)-98, b(9), b(10)++, b(10)-196++, b(10)-196, b(10)-98++, b(10)-294++, b(11)-98++, b(11)-196++, b(11)-294, b(11)-294++, b(12)-196++, b(12)-98++, b(12)++, b(13)-98++, b(13)++, b(13)-294++, b(13)-196++, b(14)-98++, b(14)++, b(14)-196++, b(14)-294++, b(15)-196++, b(15)-98++, b(15)-294++, b(16)++, b(16)-98++, b(17)-98++, b(17)-294++, b(17)++, b(18)-98++, b(18)++, b(18)-196++, b(18)-294++, b(19)-294++, b(19)-98++

**Matched y ions:** y(2), y(3), y(4), y(5), y(6), y(7), y(8), y(8)++, y(9), y(10), y(10)++, y(11), y(11)-98++, y(11)++, y(11)-98, y(12), y(12)-98++, y(12)-98, y(13), y(13)-98, y(13)-98++, y(13)++, y(14), y(14)-98++, y(15)-98, y(15)++, y(15)-196++, y(16)++, y(16)-98++, y(16)-196++, y(17)-98++, y(17)++, y(18)-294++, y(18)++, y(19)-98++, y(19)-196++, y(19)++

**Precursor origin neutral loss:** +

## Peptide No.761

**RMSREPTLDSISELPEEDSR**

**Confirmed sites:** @T:7

**Ambiguous sites:**

MS/MS Fragmentation of **RMSREPTLDSISELPEEDSR**

Found in **OBSCN\_MOUSE**, Obscurin OS=Mus musculus GN=Obscn PE=2 SV=2

Match to Query 5857: 2476.138203 from(826.386677,3+)

Title: Elution from: 43.947 to 43.947 scan no 3883 cid35.00 polarity:+:MA10:m1s

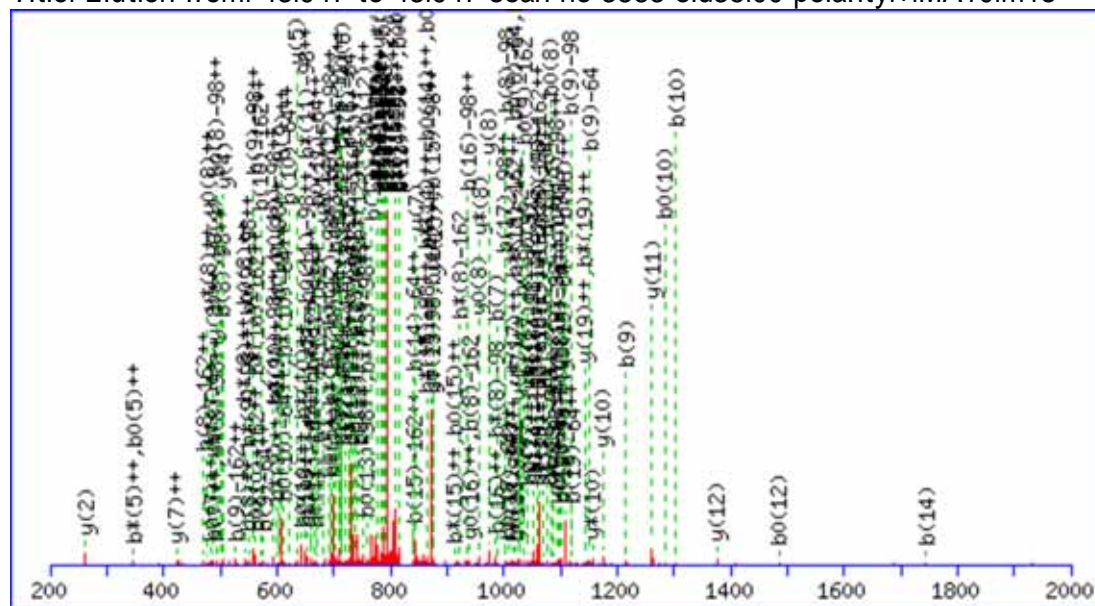

**Monoisotopic mass of neutral peptide Mr(calc):** 2476.1365

**Fixed modifications:** Carbamidomethyl (C) (apply to specified residues or termini only)

**Variable modifications:**

**N-term :** Dimethyl:2H(4)13C(2) (N-term)

**M2 :** Oxidation (M), with neutral losses 0.0000(shown in table), 63.9983

**T7 :** Phospho (ST), with neutral losses 0.0000(shown in table), 97.9769

**Ions Score:** 37 **Expect:** 0.016

**Matched b ions:** b(5), b(6), b(7)++, b(7), b(8)++, b(8)-98++, b(8)-98, b(9)-98++, b(9)++, b(9), b(9)-98, b(10)++, b(10), b(10)-98++, b(11)++, b(11)-98++, b(12)++, b(12)-98++, b(13)-98++, b(13)++, b(14)++, b(14), b(15)-98++, b(16)++, b(16)-98++, b(17)++, b(17)-98++, b(18)++, b(18)-98++, b(19)-98++

**Matched y ions:** y(2), y(4), y(5), y(6), y(7)++, y(7), y(8), y(8)++, y(9), y(10), y(11), y(12), y(14)-98++, y(17)++, y(18)-98++, y(18)++, y(19)-98++, y(19)++

**Precursor origin neutral loss:** +

## Peptide No.762

**RMSREPTLDSISELPEEDSR**

**Confirmed sites:** @S:3

**Ambiguous sites:**

MS/MS Fragmentation of **RMSREPTLDSISELPEEDSR**

Found in **OBSCN\_MOUSE**, Obscurin OS=Mus musculus GN=Obscn PE=2 SV=2

Match to Query 6615: 2460.143556 from(821.055128,3+)

Title: Elution from: 46.659 to 46.659 scan no 4351 cid35.00 polarity:+:MA10:m1s



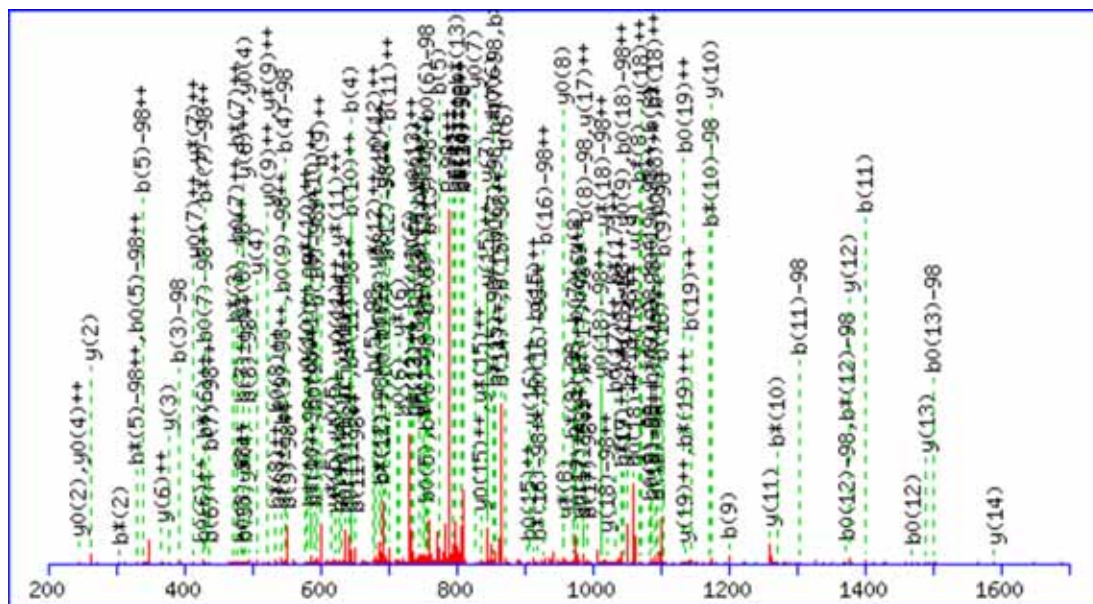

**Monoisotopic mass of neutral peptide Mr(calc):** 2460.1415

**Fixed modifications:** Carbamidomethyl (C) (apply to specified residues or termini only)

**Variable modifications:**

**N-term :** Dimethyl:2H(4)13C(2) (N-term)

**S3 :** Phospho (ST), with neutral losses 0.0000(shown in table), 97.9769

**Ions Score:** 47 **Expect:** 0.0018

**Matched b ions:** b(3)-98, b(3), b(4)-98, b(4), b(5)-98++, b(5)-98, b(5), b(6)++, b(6), b(7)-98++, b(7)++, b(7), b(8)++, b(8)-98++, b(8)-98, b(8), b(9)++, b(9), b(9)-98++, b(9)-98, b(10)-98++, b(10)++, b(11), b(11)-98, b(11)-98++, b(11)++, b(12)-98++, b(12)++, b(13)++, b(13)-98++, b(14)++, b(15)-98++, b(15)++, b(16)++, b(16)-98++, b(17)++, b(17)-98++, b(18)++, b(18)-98++, b(19)++, b(19)-98++

**Matched y ions:** y(2), y(3), y(4), y(5), y(6), y(6)++, y(7), y(8), y(8)++, y(9), y(10), y(10)++, y(11), y(11)++, y(12), y(12)++, y(13), y(13)++, y(14), y(14)++, y(15)++, y(16)++, y(17)++, y(18)-98++, y(18)++, y(19)-98++, y(19)++

**Precursor origin neutral loss:** +

## Peptide No.763

**RMSREPTLDSISELPEEDSR**

**Confirmed sites:** @T:7

**Ambiguous sites:**

MS/MS Fragmentation of **RMSREPTLDSISELPEEDSR**

Found in **OBSCN\_MOUSE**, Obscurin OS=Mus musculus GN=Obscn PE=2 SV=2

Match to Query 6402: 2460.143274 from(821.055034,3+)

Title: Elution from: 46.600 to 46.600 scan no 4323 cid35.00 polarity:+:MA10:m1s



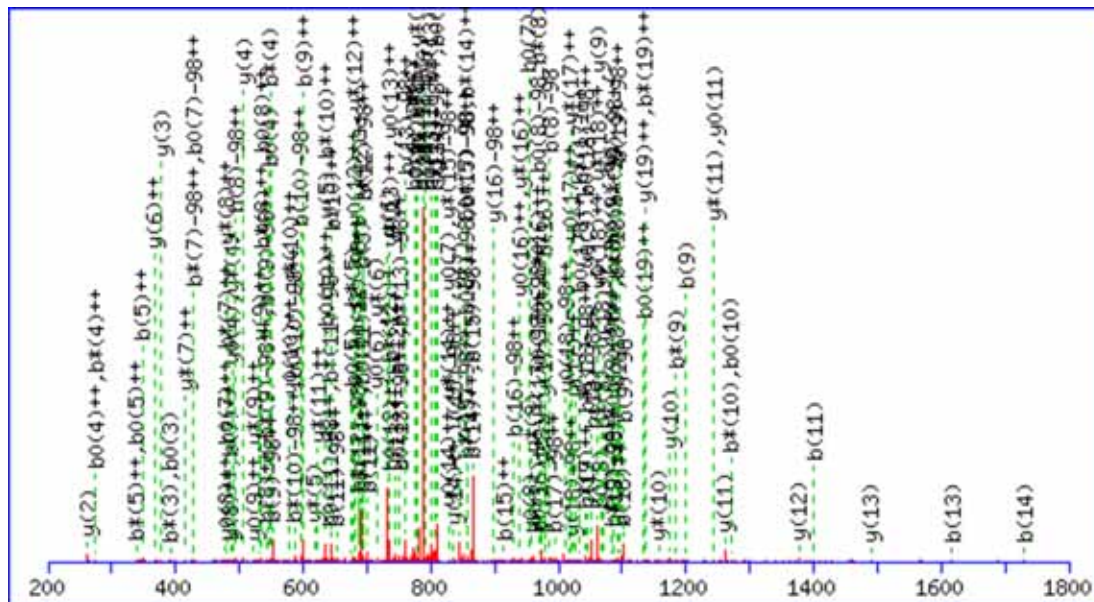

**Monoisotopic mass of neutral peptide Mr(calc):** 2460.1415

**Fixed modifications:** Carbamidomethyl (C) (apply to specified residues or termini only)

**Variable modifications:**

**N-term :** Dimethyl:2H(4)13C(2) (N-term)

**T7 :** Phospho (ST), with neutral losses 0.0000(shown in table), 97.9769

**Ions Score:** 41 **Expect:** 0.0071

**Matched b ions:** b(5)++, b(5), b(6), b(7)++, b(7), b(8)-98++, b(8)-98, b(8), b(8)++, b(9)-98++, b(9)++, b(9), b(9)-98, b(10)++, b(10)-98++, b(11), b(11)++, b(11)-98++, b(12)++, b(12)-98++, b(13)-98++, b(13)++, b(13), b(14)++, b(14), b(15)-98++, b(15)++, b(16)-98++, b(16)++, b(17)++, b(17)-98++, b(18)++, b(18)-98++, b(19)-98++

**Matched y ions:** y(2), y(3), y(4), y(5), y(6), y(6)++, y(7), y(8), y(8)++, y(9), y(9)++, y(10), y(11), y(12), y(12)++, y(13), y(13)++, y(14)-98++, y(14)++, y(15)-98++, y(16)-98++, y(17)-98++, y(17)++, y(18)-98++, y(18)++, y(19)-98++, y(19)++

**Precursor origin neutral loss:** +

## Peptide No.764

**RPDYAPMESSDEEDEFQFIK**

**Confirmed sites:** @S:9,@S:10

**Ambiguous sites:**

**MS/MS Fragmentation of RPDYAPMESSDEEDEFQFIK**

Found in **MFAP1\_MOUSE**, Microfibrillar-associated protein 1 OS=Mus musculus GN=Mfap1 PE=1 SV=1

Match to Query 8641: 2805.145902 from(936.055910,3+)

Title: Elution from: 57.051 to 57.051 scan no 5716 cid35.00 polarity:+:MA10:m1s

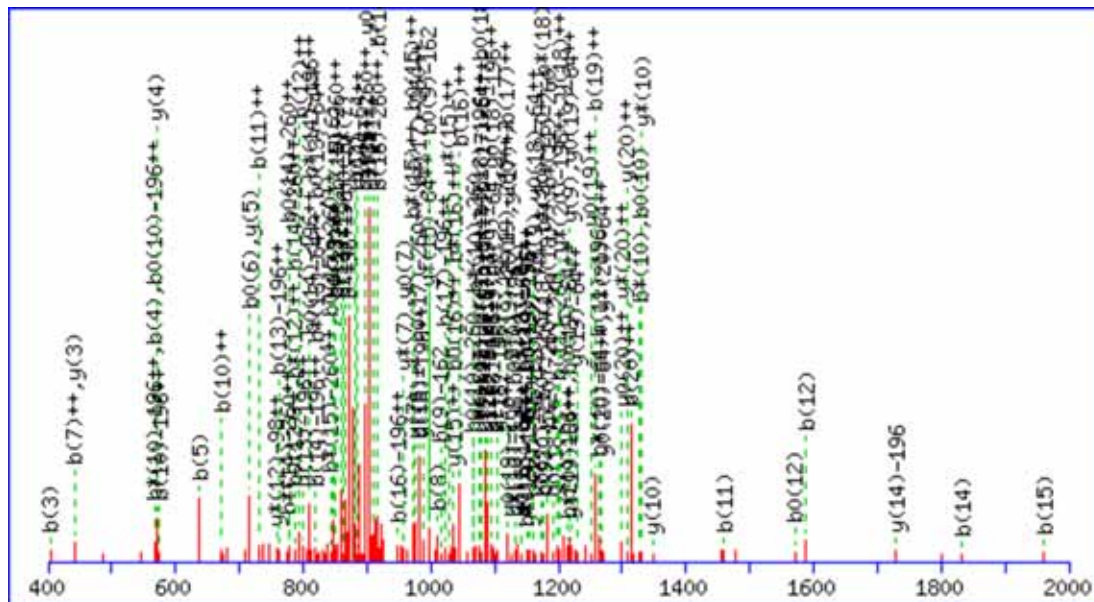

**Monoisotopic mass of neutral peptide Mr(calc):** 2805.1442

**Fixed modifications:** Carbamidomethyl (C) (apply to specified residues or termini only)

**Variable modifications:**

**N-term :** Dimethyl:2H(4)13C(2) (N-term)

**M7 :** Oxidation (M), with neutral losses 0.0000(shown in table), 63.9983

**S9 :** Phospho (ST), with neutral losses 0.0000(shown in table), 97.9769

**S10 :** Phospho (ST), with neutral losses 0.0000(shown in table), 97.9769

**K21 :** Dimethyl:2H(4)13C(2) (K)

**Ions Score:** 64 **Expect:** 2.3e-005

**Matched b ions:** b(3), b(4), b(5), b(7)++, b(7), b(8), b(9)-98, b(9), b(10)-196++, b(10)++, b(11)-98++, b(11), b(11)++, b(11)-196, b(12), b(12)++, b(12)-98++, b(13)++, b(13)-98++, b(13)-196++, b(14), b(14)++, b(14)-196++, b(14)-98++, b(15), b(15)++, b(16)++, b(16)-98++, b(16)-196++, b(17)++, b(17)-98++, b(17)-196++, b(18)-196++, b(18)++, b(18)-98++, b(19)++, b(19)-98++, b(19)-196++, b(20)++, b(20)-98++, b(20)-196++

**Matched y ions:** y(3), y(4), y(5), y(6), y(7), y(8), y(9), y(10), y(13)-196++, y(13)-98++, y(14)-196, y(14)-196++, y(14)-98++, y(15)++, y(15)-98++, y(16)++, y(16)-98++, y(16)-196++, y(17)++, y(18)++, y(18)-98++, y(18)-196++, y(20)++

**Precursor origin neutral loss:** +

## Peptide No.765

**RPPSPDVIVLSDSEQPSSPR**

**Confirmed sites:** @S:4,@S:11,@S:18

**Ambiguous sites:**

**MS/MS Fragmentation of RPPSPDVIVLSDSEQPSSPR**

Found in **P66A\_MOUSE**, Transcriptional repressor p66 alpha OS=Mus musculus GN=Gatad2a PE=1 SV=2

Match to Query 7335: 2430.028980 from(811.016936,3+)

Title: Elution from: 47.968 to 47.968 scan no 4663 cid35.00 polarity:+:MA10:m1s

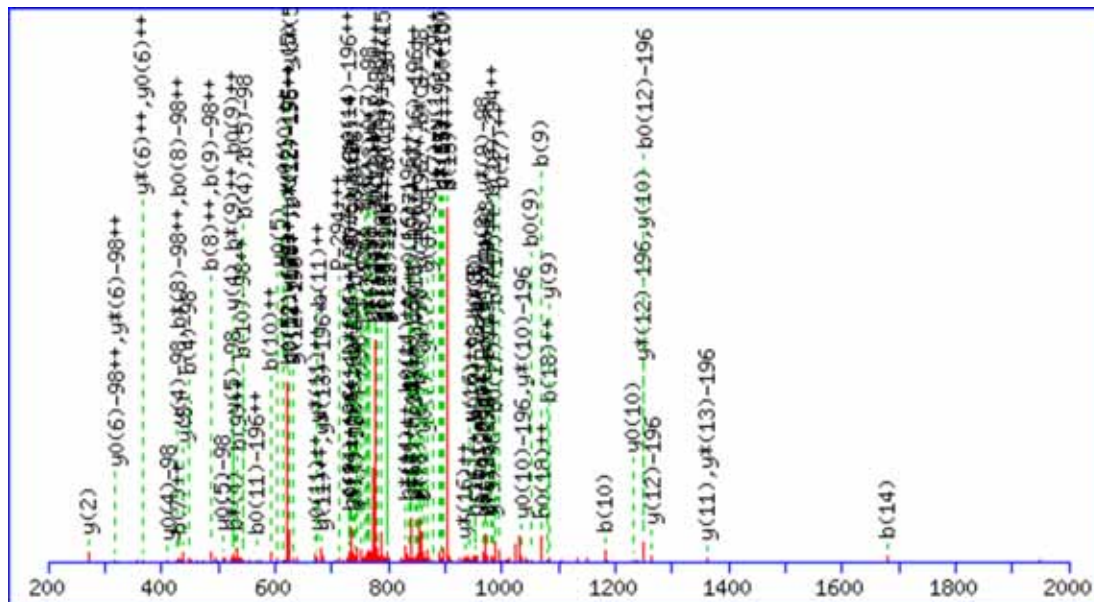

**Monoisotopic mass of neutral peptide Mr(calc):** 2430.0270

**Fixed modifications:** Carbamidomethyl (C) (apply to specified residues or termini only)

**Variable modifications:**

**N-term :** Dimethyl (N-term)

**S4 :** Phospho (ST), with neutral losses 0.0000(shown in table), 97.9769

**S11 :** Phospho (ST), with neutral losses 0.0000(shown in table), 97.9769

**S18 :** Phospho (ST), with neutral losses 0.0000(shown in table), 97.9769

**Ions Score:** 46 **Expect:** 0.0015

**Matched b ions:** b(4)-98, b(4), b(5)-98, b(6), b(7)++, b(7), b(8)++, b(8), b(9)++, b(9)-98++, b(9), b(9)-98, b(10), b(10)++, b(10)-98++, b(11)-98++, b(11)++, b(12)++, b(12)-98++, b(13)++, b(13)-98++, b(14), b(14)++, b(14)-98++, b(15)++, b(15)-98++, b(16)-98++, b(16)-196++, b(16)++, b(17)++, b(17)-98++, b(18)-98++, b(18)++, b(18)-196++, b(19)-196++, b(19)-98++, b(19)-294++

**Matched y ions:** y(2), y(3), y(4), y(4)-98, y(5), y(5)-98, y(6), y(7)-98, y(7), y(8), y(8)-98, y(9), y(9)-98, y(10), y(10)-98, y(10)-98++, y(10)++, y(11), y(11)++, y(11)-98, y(11)-98++, y(12)-98, y(12)-98++, y(12)-196++, y(12)-196, y(12)++, y(13)++, y(13)-98++, y(14)-98++, y(14)-196++, y(14)++, y(15)-196++, y(15)++, y(16)-98++, y(16)++, y(17)-294++

**Precursor origin neutral loss:** +

## Peptide No.766

**RPPSPDVIVLSDSEQPSSPR**

**Confirmed sites:** @S:4,@S:13,@S:18

**Ambiguous sites:**

MS/MS Fragmentation of **RPPSPDVIVLSDSEQPSSPR**

Found in **P66A\_MOUSE**, Transcriptional repressor p66 alpha OS=Mus musculus GN=Gatad2a PE=1 SV=2

Match to Query 6335: 2430.028221 from(811.016683,3+)

Title: Elution from: 47.962 to 47.962 scan no 4486 cid35.00 polarity:+:MA10:m1s

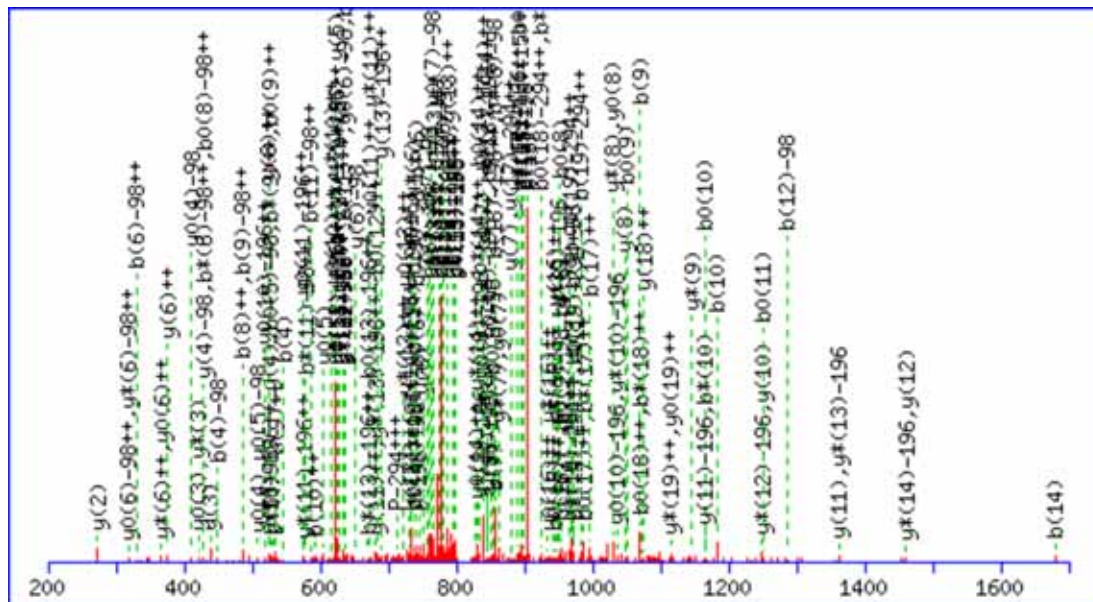

**Monoisotopic mass of neutral peptide Mr(calc):** 2430.0270

**Fixed modifications:** Carbamidomethyl (C) (apply to specified residues or termini only)

**Variable modifications:**

**N-term :** Dimethyl (N-term)

**S4 :** Phospho (ST), with neutral losses 0.0000(shown in table), 97.9769

**S13 :** Phospho (ST), with neutral losses 0.0000(shown in table), 97.9769

**S18 :** Phospho (ST), with neutral losses 0.0000(shown in table), 97.9769

**Ions Score:** 40 **Expect:** 0.006

**Matched b ions:** b(4)-98, b(4), b(6)-98++, b(6), b(7)-98, b(7), b(8)++, b(8), b(9)-98++, b(9), b(9)++, b(9)-98, b(10), b(10)++, b(11)-98++, b(11)++, b(12)-98, b(13)-98, b(13)-98++, b(13)++, b(14), b(14)++, b(14)-98++, b(15)++, b(15)-98++, b(16)-98++, b(16)-196++, b(16)++, b(17)++, b(17)-196++, b(18)-98++, b(18)-196++, b(19)-196++, b(19)-294++

**Matched y ions:** y(2), y(3), y(4)-98, y(4), y(5), y(5)-98, y(6)++, y(6), y(6)-98, y(7)-98, y(7), y(8)++, y(8)-196, y(8)-98, y(8), y(9)-98, y(10), y(10)-196++, y(10)-98++, y(10)++, y(10)-98, y(11), y(11)-98++, y(11)-98, y(11)++, y(11)-196, y(12), y(12)-196++, y(12)-98++, y(12)++, y(13)++, y(13)-196++, y(13)-98++, y(14)-98++, y(14)-196++, y(15)++, y(15)-196++, y(15)-98++, y(16)-196++, y(16)-98++, y(16)++, y(17)-294++, y(17)-196++, y(18)++

**Precursor origin neutral loss:** +

## Peptide No.767

**RPSPDDDLTDEDNDDMQLQAQR**

**Confirmed sites:** @T:9

**Ambiguous sites:**

**MS/MS Fragmentation of RPSPDDDLTDEDNDDMQLQAQR**

Found in **NEDD4\_MOUSE**, E3 ubiquitin-protein ligase NEDD4 OS=Mus musculus GN=Nedd4 PE=1 SV=3

Match to Query 8131: 2697.086730 from(900.036186,3+)

Title: Elution from: 35.035 to 35.035 scan no 2994 cid35.00 polarity:+:MA10:m1s



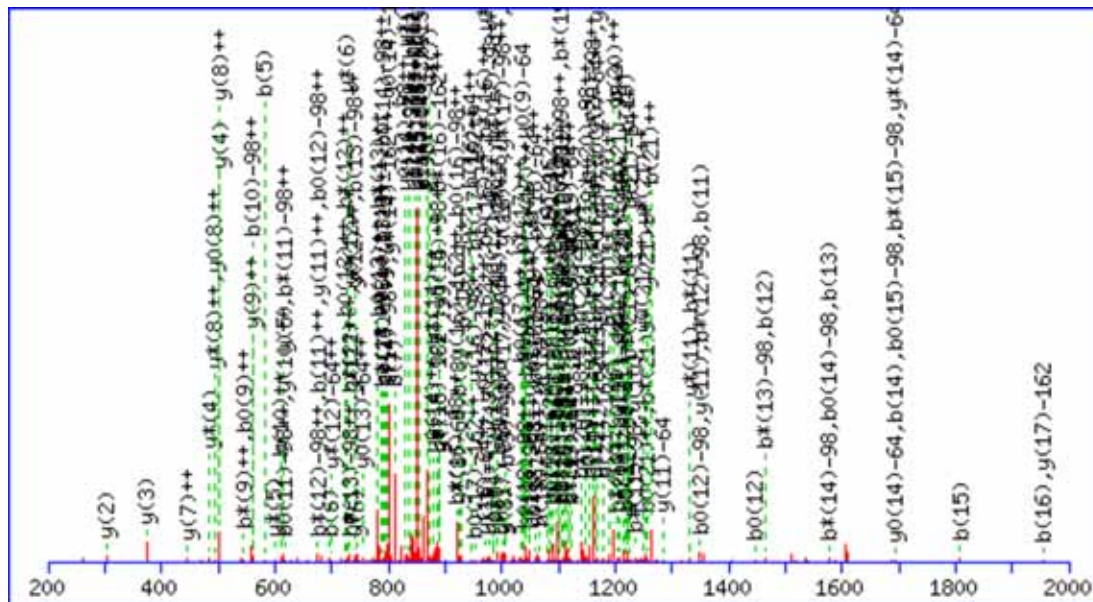

**Monoisotopic mass of neutral peptide Mr(calc):** 2697.0861

**Fixed modifications:** Carbamidomethyl (C) (apply to specified residues or termini only)

**Variable modifications:**

**N-term :** Dimethyl (N-term)

**T9 :** Phospho (ST), with neutral losses 0.0000(shown in table), 97.9769

**M16 :** Oxidation (M), with neutral losses 0.0000(shown in table), 63.9983

**Ions Score:** 46 **Expect:** 0.0012

**Matched b ions:** b(5), b(6), b(7), b(8), b(9)-98, b(9), b(10)++, b(10), b(10)-98++, b(10)-98, b(11)++, b(11), b(12)++, b(12), b(13), b(13)-98++, b(13)++, b(14), b(14)-98++, b(14)++, b(15), b(15)-98++, b(16), b(16)++, b(16)-98++, b(17)++, b(17)-98++, b(18)++, b(18)-98++, b(19)++, b(19)-98++, b(20)++, b(20)-98++, b(21)++, b(21)-98++

**Matched y ions:** y(2), y(3), y(4), y(5), y(6), y(7)++, y(7), y(8)++, y(8), y(9)++, y(9), y(10)++, y(10), y(11)++, y(11), y(12)++, y(14)++, y(14)-98++, y(16)++, y(16)-98++, y(18)-98++, y(18)++, y(19)++, y(20)-98++, y(20)++, y(21)-98++, y(21)++

**Precursor origin neutral loss:** +

## Peptide No.768

**RQISEDVDGPDNR**

**Confirmed sites:** @S:4

**Ambiguous sites:**

**MS/MS Fragmentation of RQISEDVDGPDNR**

Found in **NEDD4\_MOUSE**, E3 ubiquitin-protein ligase NEDD4 OS=Mus musculus GN=Nedd4 PE=1 SV=3

Match to Query 3161: 1607.694484 from(804.854518,2+)

Title: Elution from: 25.324 to 25.324 scan no 1675 cid35.00 polarity:+:MA10

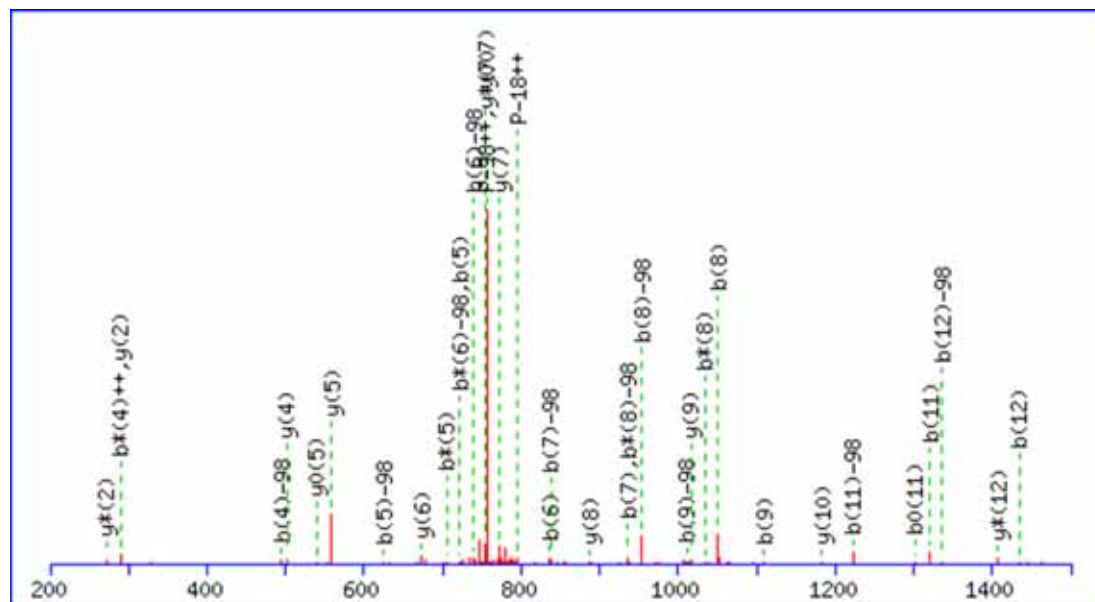

**Monoisotopic mass of neutral peptide Mr(calc):** 1607.6941

**Fixed modifications:** Carbamidomethyl (C) (apply to specified residues or termini only)

**Variable modifications:**

**N-term :** Dimethyl (N-term)

**S4 :** Phospho (ST), with neutral losses 97.9769(shown in table), 0.0000

**Ions Score:** 41 **Expect:** 0.0024

**Matched b ions:** b(4)-98, b(5)-98, b(5), b(6), b(6)-98, b(7), b(7)-98, b(8)-98, b(8), b(9), b(9)-98, b(11)-98, b(11), b(12)-98, b(12)

**Matched y ions:** y(2), y(4), y(5), y(6), y(7), y(8), y(9), y(10)

**Precursor origin neutral loss:** +

## Peptide No.769

**RQLHIEGASLELSDDDTESK**

**Confirmed sites:** @S:9,@S:13

**Ambiguous sites:**

MS/MS Fragmentation of **RQLHIEGASLELSDDDTESK**

Found in **MYH10\_MOUSE**, Myosin-10 OS=Mus musculus GN=Myh10 PE=1 SV=2

Match to Query 7407: 2458.067979 from(820.363269,3+)

Title: Elution from: 45.831 to 45.831 scan no 4403 cid35.00 polarity:+:MA10:m1s

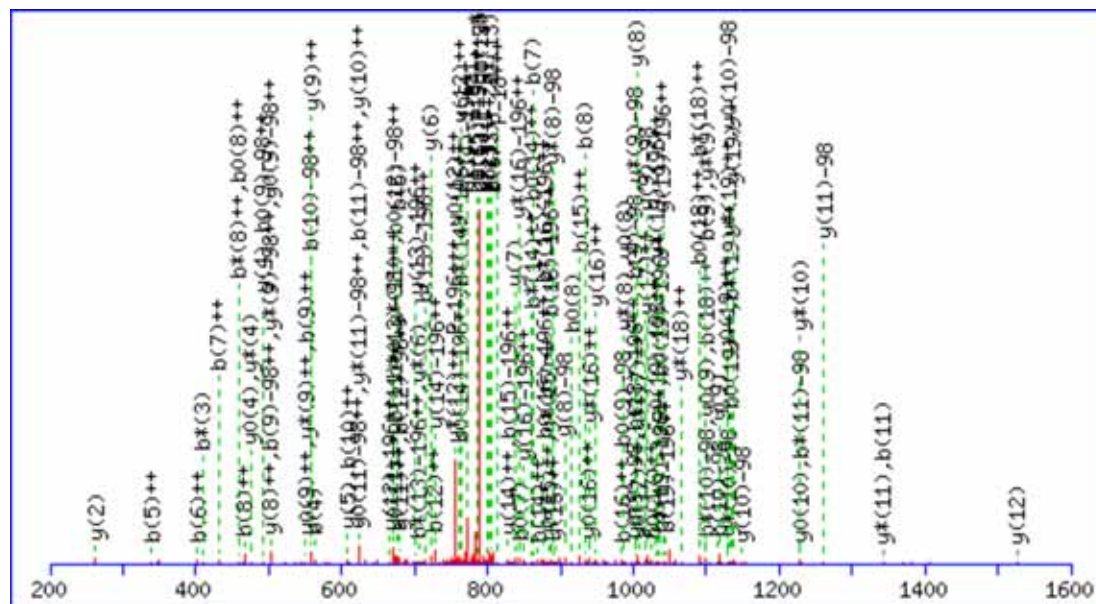

**Monoisotopic mass of neutral peptide Mr(calc):** 2458.0665

**Fixed modifications:** Carbamidomethyl (C) (apply to specified residues or termini only)

**Variable modifications:**

**N-term :** Dimethyl (N-term)

**S9 :** Phospho (ST), with neutral losses 0.0000(shown in table), 97.9769

**S13 :** Phospho (ST), with neutral losses 0.0000(shown in table), 97.9769

**K20 :** Dimethyl (K)

**Ions Score:** 48 **Expect:** 0.0011

**Matched b ions:** b(4), b(5)++, b(5), b(6)++, b(6), b(7)++, b(7), b(8)++, b(8), b(9)-98++, b(9), b(9)++, b(9)-98, b(10)-98++, b(10)++, b(10)-98, b(11)-98++, b(11), b(11)++, b(12)++, b(12)-98++, b(13)-98++, b(13)-196++, b(14)-196++, b(14)++, b(15)++, b(15)-98++, b(15)-196++, b(16)++, b(16)-98++, b(16)-196++, b(17)-98++, b(18)-98++, b(18)++, b(18)-196++, b(19)-196++, b(19)-98++

**Matched y ions:** y(2), y(4), y(5), y(6), y(7), y(8)++, y(8)-98, y(8), y(9), y(9)-98, y(9)++, y(10)++, y(10)-98, y(11)-98, y(11)++, y(12), y(12)-196++, y(12)-98++, y(12)++, y(13)-196++, y(13)++, y(14)-196++, y(14)-98++, y(14)++, y(15)-98++, y(15)++, y(16)-98++, y(16)-196++, y(16)++, y(17)++, y(18)-98++, y(19)++, y(19)-196++

**Precursor origin neutral loss:** +

## Peptide No.770

**RQSQQLPEEDCMQLNPSFK**

**Confirmed sites:** @S:3

**Ambiguous sites:**

MS/MS Fragmentation of **RQSQQLPEEDCMQLNPSFK**

Found in **PPAC3\_MOUSE**, Probable lipid phosphate phosphatase PPAPDC3 OS=Mus musculus GN=Ppapdc3 PE=1 SV=1

Match to Query 7499: 2486.099229 from(829.707019,3+)

Title: Elution from: 40.785 to 40.785 scan no 3771 cid35.00 polarity:+:MA10:m1s

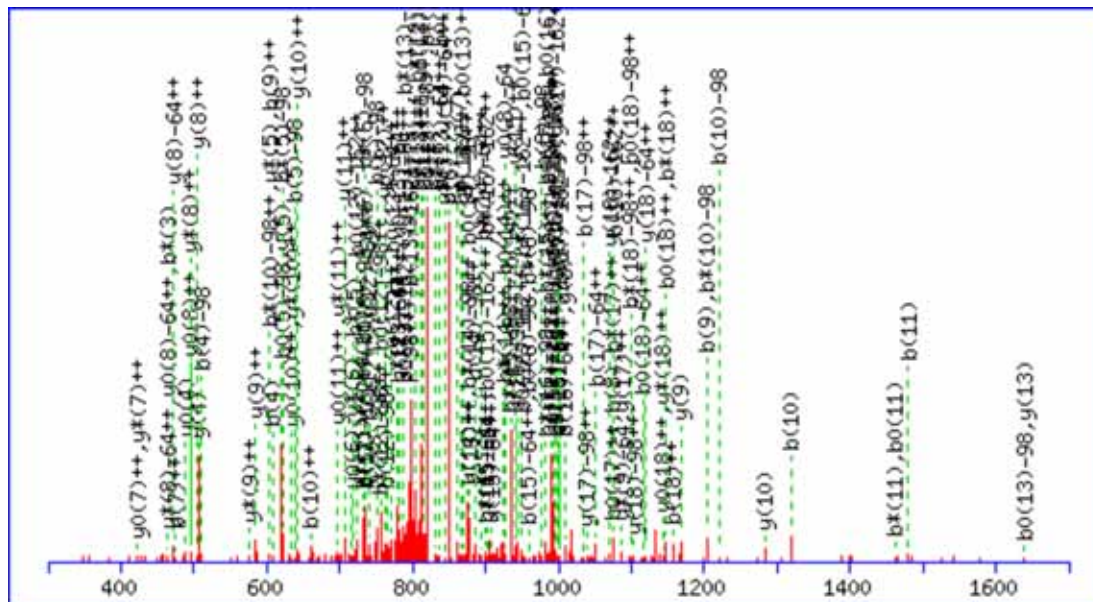

**Monoisotopic mass of neutral peptide Mr(calc):** 2486.0971

**Fixed modifications:** Carbamidomethyl (C) (apply to specified residues or termini only)

**Variable modifications:**

**N-term :** Dimethyl (N-term)

**S3 :** Phospho (ST), with neutral losses 0.0000(shown in table), 97.9769

**M12 :** Oxidation (M), with neutral losses 0.0000(shown in table), 63.9983

**K19 :** Dimethyl (K)

**Ions Score:** 38 **Expect:** 0.012

**Matched b ions:** b(4)-98, b(4), b(5), b(5)-98, b(6), b(6)-98, b(7)++, b(8), b(8)-98, b(9), b(9)++, b(10), b(10)++, b(10)-98, b(11), b(11)++, b(12)-98, b(12)++, b(13)++, b(14)++, b(14)-98, b(15)++, b(15)-98, b(16)-98, b(17)-98, b(18)++

**Matched y ions:** y(4), y(5), y(6), y(7), y(8), y(8)++, y(9), y(9)++, y(10), y(10)++, y(11)++, y(12)++, y(13)++, y(13), y(14)++, y(15)++, y(17)++, y(17)-98, y(18)-98

**Precursor origin neutral loss:** +

## Peptide No.771

**RQSSTADAPEAQHEPGITITEWK**

**Confirmed sites:** @S:4

**Ambiguous sites:**

MS/MS Fragmentation of **RQSSTADAPEAQHEPGITITEWK**

Found in **KPBB\_MOUSE**, Phosphorylase b kinase regulatory subunit beta OS=Mus musculus GN=Phkb PE=1 SV=1

Match to Query 8124: 2687.259183 from(896.760337,3+)

Title: Elution from: 43.460 to 43.460 scan no 4112 cid35.00 polarity:+:MA10:m1s





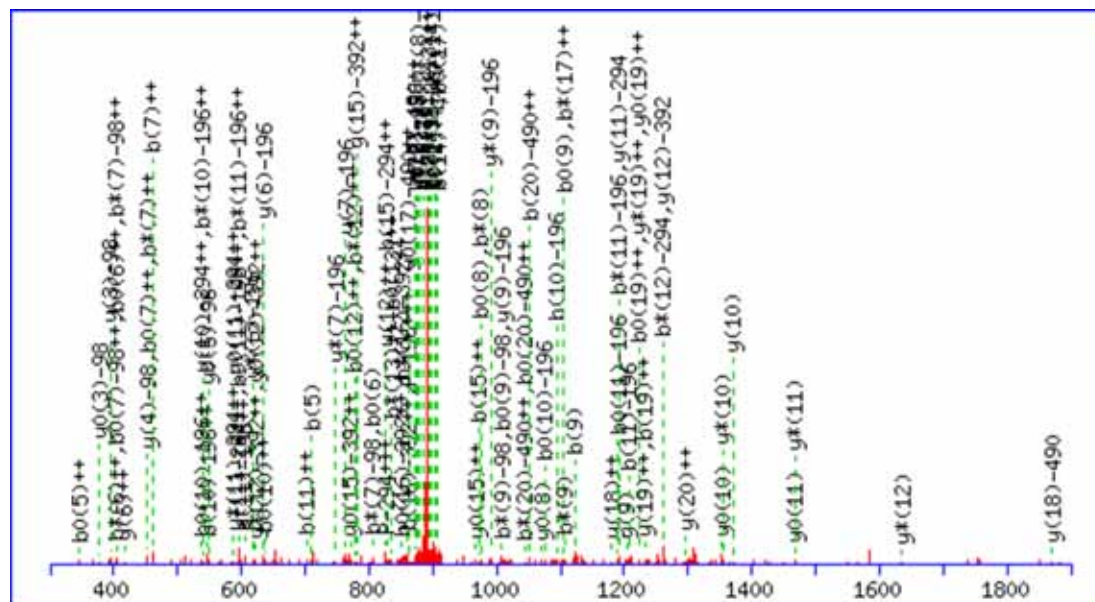

**Monoisotopic mass of neutral peptide Mr(calc): 2773.8905**

**Fixed modifications:** Carbamidomethyl (C) (apply to specified residues or termini only)

**Variable modifications:**

**N-term :** Dimethyl (N-term)

**S5 :** Phospho (ST), with neutral losses 97.9769(shown in table), 0.0000

**S10 :** Phospho (ST), with neutral losses 97.9769(shown in table), 0.0000

**S12 :** Phospho (ST), with neutral losses 97.9769(shown in table), 0.0000

**S16 :** Phospho (ST), with neutral losses 97.9769(shown in table), 0.0000

**T19 :** Phospho (ST), with neutral losses 97.9769(shown in table), 0.0000

**K21 :** Dimethyl:2H(4)13C(2) (K)

**Ions Score: 21 Expect: 0.046**

**Matched b ions:** b(5), b(7)++, b(8)-98, b(9), b(10)-98++, b(10)-196++, b(10)-98, b(10)-196, b(11)-98++, b(11)-196, b(11)-196++, b(11)++, b(11)-98, b(13)-196++, b(14)-98++, b(14)++, b(15)-294++, b(15)-196++, b(15)++, b(16)-98++, b(16)-392++, b(16)-294++, b(17)-294++, b(18)-196++, b(18)-98++, b(19)-196++, b(19)++, b(20)-490++, b(20)-392++, b(20)-294++, b(20)-98++

**Matched y ions:** y(3)-98, y(4)-98, y(6)-196, y(6)++, y(7)-196, y(7)-98, y(8)-196, y(8)-98, y(9)-196, y(9)-98, y(9), y(10), y(10)-294++, y(11)-294++, y(11)-294, y(11)-196++, y(12)++, y(12)-392, y(12)-98++, y(13)++, y(13)-294++, y(13)-98++, y(14)-98, y(14)-294++, y(15)-196, y(15)-196++, y(15)-392++, y(16)-294++, y(17)-196++, y(17)-490++, y(18)-490, y(18)++, y(19)-196++, y(19)++, y(20)-98++, y(20)++

**Precursor origin neutral loss: +**

## Peptide No.773

**RQYDDAPSVPR**

**Confirmed sites: @S:8**

**Ambiguous sites:**

MS/MS Fragmentation of **RQYDDAPSVPR**

Found in **K1462\_MOUSE**, Uncharacterized protein KIAA1462 OS=Mus musculus GN=Kiaa1462 PE=1 SV=2

Match to Query 2853: 1416.660930 from(473.227586,3+)

Title: Elution from: 22.387 to 22.387 scan no 1212 cid35.00 polarity:+:MA10:m1s

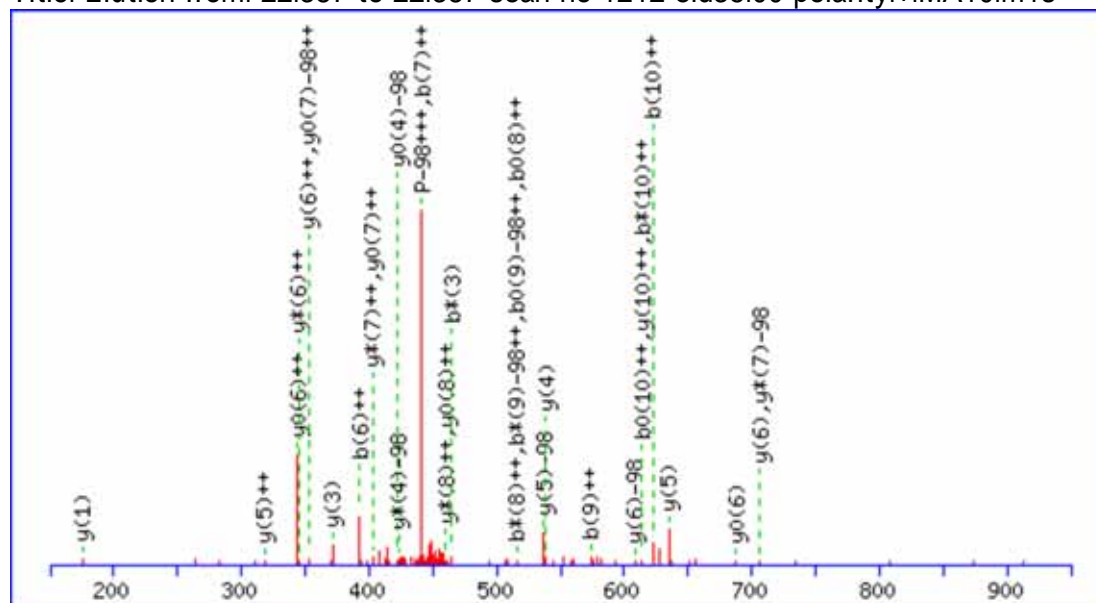

Monoisotopic mass of neutral peptide Mr(calc): 1416.6611

Fixed modifications: Carbamidomethyl (C) (apply to specified residues or termini only)

Variable modifications:

N-term : Dimethyl:2H(4)13C(2) (N-term)

S8 : Phospho (ST), with neutral losses 0.0000(shown in table), 97.9769

Ions Score: 32 Expect: 0.026

Matched b ions: b(6)++, b(7)++, b(9)++, b(10)++

Matched y ions: y(1), y(3), y(4), y(5)-98, y(5), y(5)++, y(6), y(6)++, y(6)-98, y(10)++

Precursor origin neutral loss: +

## Peptide No.774

**RRGSGQDLAGPAPETLEQTEGATP**

Confirmed sites: @S:4

Ambiguous sites:

MS/MS Fragmentation of **RRGSGQDLAGPAPETLEQTEGATP**

Found in **PDE7B\_MOUSE**, cAMP-specific 3',5'-cyclic phosphodiesterase 7B OS=Mus musculus  
GN=Pde7b PE=2 SV=1

Match to Query 6694: 2551.215723 from(851.412517,3+)

Title: Elution from: 40.707 to 40.707 scan no 3573 cid35.00 polarity:+:MA10:m1s

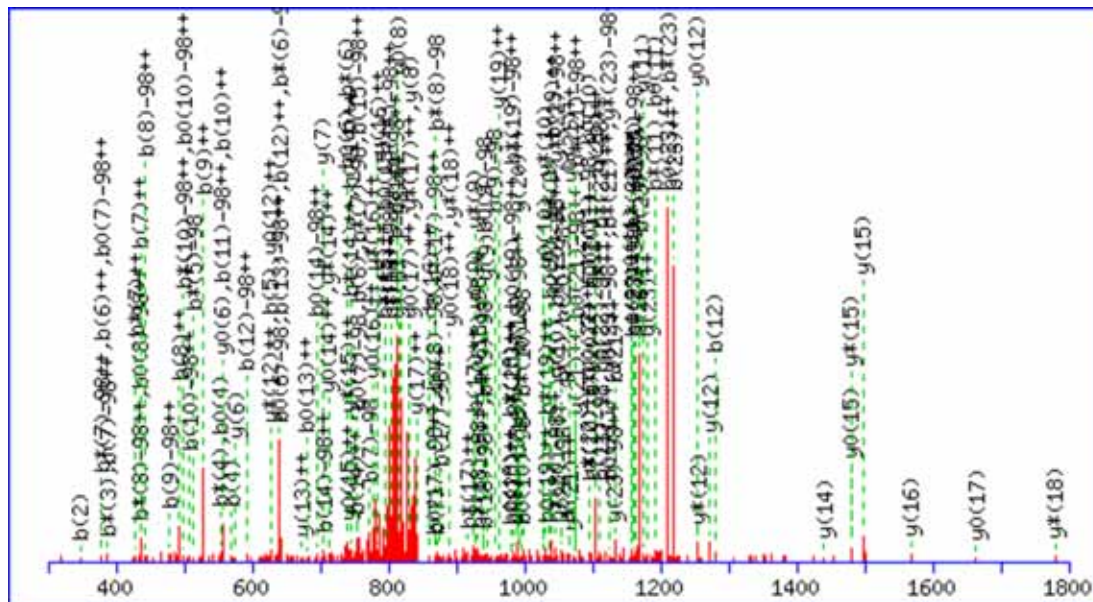

**Monoisotopic mass of neutral peptide Mr(calc): 2551.2128**

**Fixed modifications:** Carbamidomethyl (C) (apply to specified residues or termini only)

**Variable modifications:**

**N-term :** Dimethyl:2H(4)13C(2) (N-term)

**S4 :** Phospho (ST), with neutral losses 0.0000(shown in table), 97.9769

**Ions Score:** 73 **Expect:** 4.4e-006

**Matched b ions:** b(2), b(4), b(5), b(6)++, b(6), b(7)-98++, b(7)++, b(7)-98, b(7), b(8)++, b(8), b(8)-98++, b(9)++, b(9)-98++, b(9), b(9)-98, b(10)++, b(10)-98++, b(11), b(11)-98++, b(11)-98, b(12)++, b(12), b(12)-98++, b(13)-98++, b(14)-98++, b(14)++, b(15)-98++, b(15)++, b(16)-98++, b(16)++, b(17)++, b(17)-98++, b(18)++, b(18)-98++, b(19)++, b(19)-98++, b(20)++, b(20)-98++, b(21)++, b(22)++, b(23)++, b(23)-98++

**Matched y ions:** y(6), y(7), y(8), y(9), y(10), y(11), y(12), y(13)++, y(14), y(15), y(16), y(16)++, y(17)++, y(19)++, y(20)++, y(21)++, y(22)-98++, y(23)-98++, y(23)++

**Precursor origin neutral loss:** +

## Peptide No.775

**RRHSGQDVHVVLK**

**Confirmed sites: @S:4**

**Ambiguous sites:**

MS/MS Fragmentation of **RRHSGQDVHVVLK**

Found in **NSF1C\_MOUSE**, NSF1L1 cofactor p47 OS=Mus musculus GN=Nsf1l1c PE=1 SV=1

Match to Query 2609: 1665.883324 from(417.478107,4+)

Title: Elution from: 22.661 to 22.661 scan no 1207 cid35.00 polarity:+:MA10



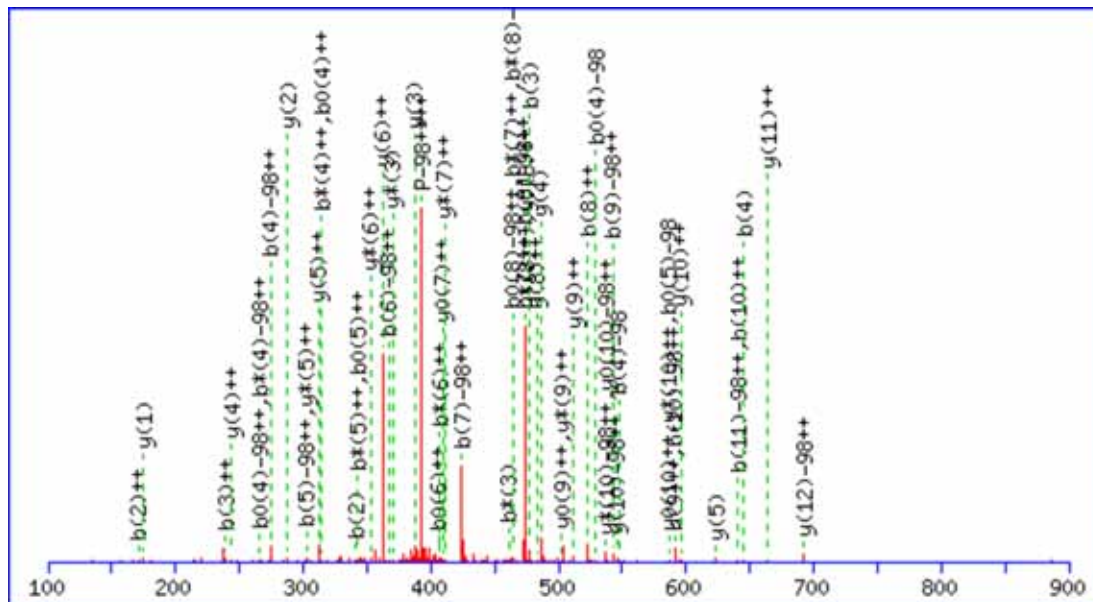

**Monoisotopic mass of neutral peptide Mr(calc):** 1665.8828

**Fixed modifications:** Carbamidomethyl (C) (apply to specified residues or termini only)

**Variable modifications:**

**N-term :** Dimethyl (N-term)

**S4 :** Phospho (ST), with neutral losses 97.9769(shown in table), 0.0000

**K13 :** Dimethyl (K)

**Ions Score:** 49 **Expect:** 0.00061

**Matched b ions:** b(2)++, b(2), b(3)++, b(3), b(4)-98++, b(4), b(4)-98, b(5)-98++, b(6)-98++, b(7)++, b(7)-98++, b(8)-98++, b(8)++, b(9)++, b(9)-98++, b(10)-98++, b(10)++, b(11)-98++

**Matched y ions:** y(1), y(2), y(3), y(4), y(4)++, y(5)++, y(5), y(6)++, y(8)++, y(9)++, y(10)-98++, y(10)++, y(11)++, y(12)-98++

**Precursor origin neutral loss:** +

## Peptide No.776

**RRSESSGNLPSVADTR**

**Confirmed sites:** @S:3

**Ambiguous sites:**

**MS/MS Fragmentation of RRSESSGNLPSVADTR**

Found in **AKAP1\_MOUSE**, A-kinase anchor protein 1, mitochondrial OS=Mus musculus GN=Akap1 PE=1 SV=3

Match to Query 4591: 1838.864043 from(613.961957,3+)

Title: Elution from: 26.972 to 26.972 scan no 1890 cid35.00 polarity:+:MA10

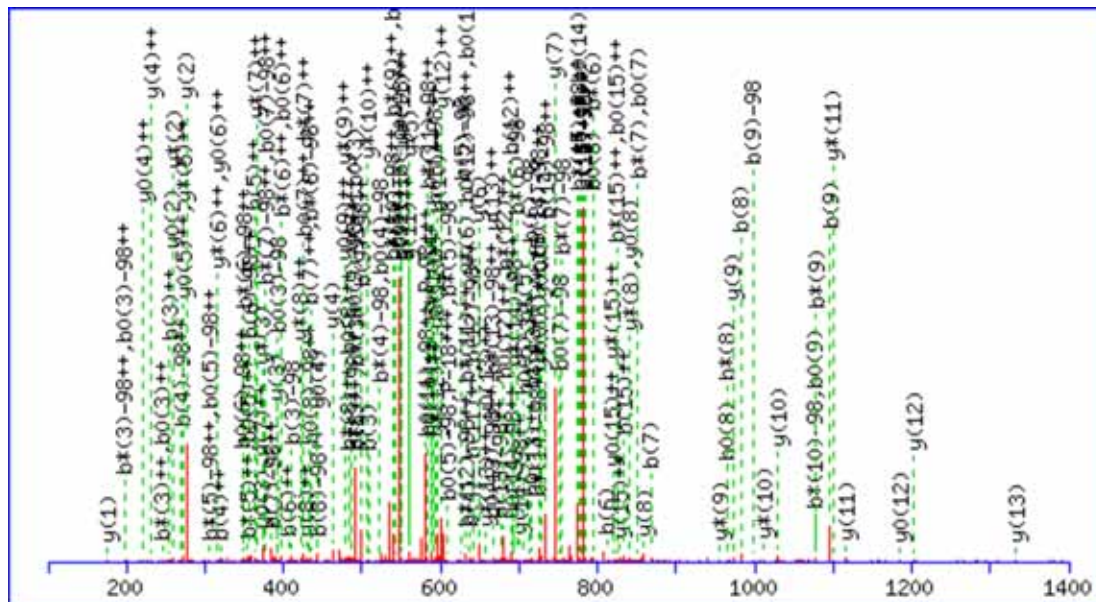

**Monoisotopic mass of neutral peptide Mr(calc):** 1838.8636

**Fixed modifications:** Carbamidomethyl (C) (apply to specified residues or termini only)

**Variable modifications:**

**N-term :** Dimethyl (N-term)

**S3 :** Phospho (ST), with neutral losses 0.0000(shown in table), 97.9769

**Ions Score:** 45 **Expect:** 0.0015

**Matched b ions:** b(3)++, b(3)-98, b(3), b(4)-98, b(4)++, b(4)-98++, b(4), b(5)++, b(5)-98, b(5), b(6)-98++, b(6)++, b(6)-98, b(6), b(7)-98++, b(7), b(7)++, b(8), b(8)++, b(8)-98++, b(9)++, b(9), b(9)-98++, b(9)-98, b(10)-98++, b(10)++, b(11)-98++, b(11)++, b(12)++, b(12)-98++, b(13)++, b(13)-98++, b(14)++, b(14)-98++, b(15)++, b(15)-98++

**Matched y ions:** y(1), y(2), y(3), y(4), y(4)++, y(5), y(6), y(7), y(7)++, y(8), y(8)++, y(9), y(9)++, y(10), y(11), y(11)++, y(12)++, y(12), y(13), y(13)++, y(14)-98++, y(15)-98++, y(15)++

**Precursor origin neutral loss:** +

## Peptide No.777

**RRSESSGNLPSVADTR**

**Confirmed sites:** @S:3,@S:5

**Ambiguous sites:**

**MS/MS Fragmentation of RRSESSGNLPSVADTR**

Found in **AKAP1\_MOUSE**, A-kinase anchor protein 1, mitochondrial OS=Mus musculus GN=Akap1 PE=1 SV=3

Match to Query 5183: 1918.830471 from(640.617433,3+)

Title: Elution from: 29.869 to 29.869 scan no 2287 cid35.00 polarity:+:MA10



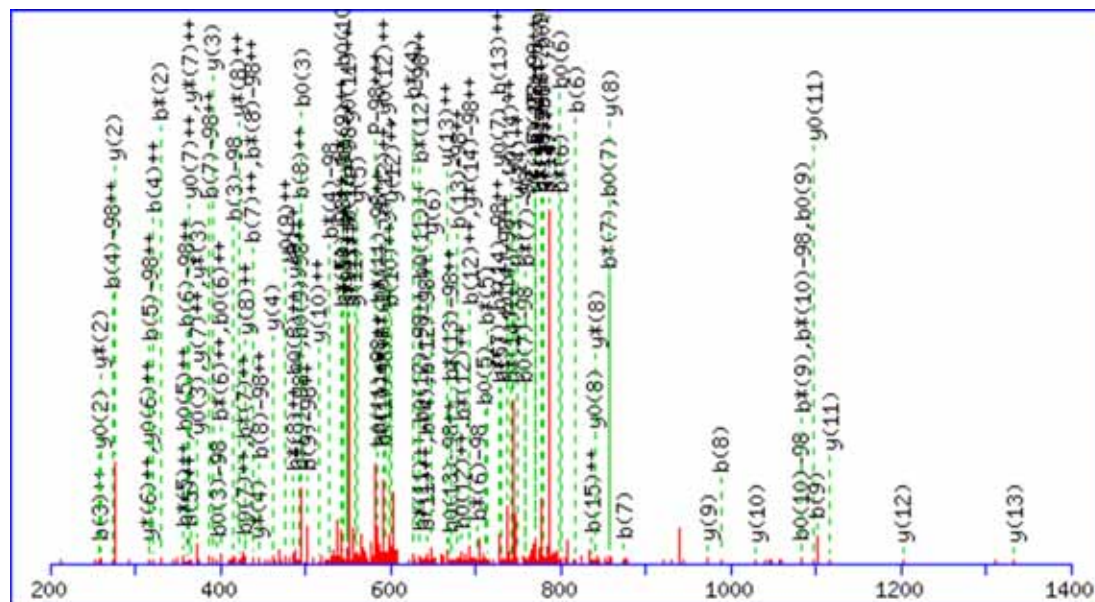

**Monoisotopic mass of neutral peptide Mr(calc):** 1844.8954

**Fixed modifications:** Carbamidomethyl (C) (apply to specified residues or termini only)

**Variable modifications:**

**N-term :** Dimethyl:2H(4)13C(2) (N-term)

**S3 :** Phospho (ST), with neutral losses 0.0000(shown in table), 97.9769

**Ions Score:** 45 **Expect:** 0.0016

**Matched b ions:** b(3)++, b(3)-98, b(4)-98++, b(4), b(4)++, b(4)-98, b(5)-98++, b(5)++, b(5), b(6)-98++, b(6), b(7)-98, b(7)-98++, b(7), b(7)++, b(8)++, b(8), b(8)-98++, b(9)++, b(9), b(9)-98++, b(10)-98++, b(10)++, b(11)++, b(11)-98++, b(12)++, b(12)-98++, b(13)++, b(13)-98++, b(14)++, b(14)-98++, b(15)++  
**Matched y ions:** y(2), y(3), y(4), y(5), y(6), y(7)++, y(7), y(8), y(8)++, y(9), y(9)++, y(10), y(10)++, y(11), y(11)++, y(12), y(12)++, y(13), y(13)++, y(14)++, y(15)-98++  
**Precursor origin neutral loss:** +

## Peptide No.779

**RRSESSGNLPSVADTR**

**Confirmed sites:** @S:3,@S:6

**Ambiguous sites:**

**MS/MS Fragmentation of RRSESSGNLPSVADTR**

Found in **AKAP1\_MOUSE**, A-kinase anchor protein 1, mitochondrial OS=Mus musculus GN=Akap1 PE=1 SV=3

Match to Query 4782: 1924.861767 from(642.627865,3+)

Title: Elution from: 29.832 to 29.832 scan no 2121 cid35.00 polarity:+:MA10:m1s





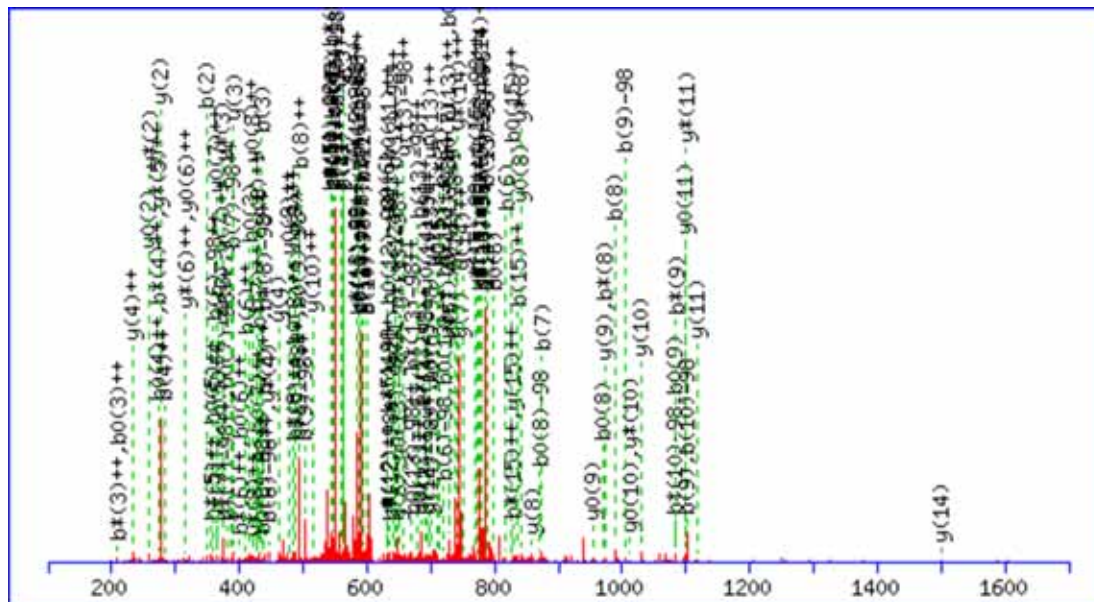

**Monoisotopic mass of neutral peptide Mr(calc):** 1844.8954

**Fixed modifications:** Carbamidomethyl (C) (apply to specified residues or termini only)

**Variable modifications:**

**N-term :** Dimethyl:2H(4)13C(2) (N-term)

**S5 :** Phospho (ST), with neutral losses 0.0000(shown in table), 97.9769

**Ions Score:** 56 **Expect:** 0.00014

**Matched b ions:** b(2), b(3), b(4)++, b(4), b(5)++, b(5)-98, b(5), b(6), b(6)-98++, b(6)++, b(6)-98, b(7), b(7)-98, b(7)-98++, b(7)++, b(8)++, b(8), b(8)-98++, b(9)++, b(9), b(9)-98, b(9)-98++, b(10)-98++, b(10)-98, b(10)++, b(11)++, b(11)-98++, b(12)-98++, b(12)++, b(13)-98++, b(13)++, b(14)++, b(14)-98++, b(15)-98++, b(15)++

**Matched y ions:** y(2), y(3), y(4)++, y(4), y(5), y(6), y(7)++, y(7), y(8), y(8)++, y(9), y(9)++, y(10), y(10)++, y(11), y(11)++, y(12)++, y(12)-98++, y(13)-98++, y(14), y(14)-98++, y(14)++, y(15)++, y(15)-98++

**Precursor origin neutral loss:** +

## Peptide No.781

**RRSESSGNLPSVADTR**

**Confirmed sites:** @S:5,@S:6

**Ambiguous sites:**

**MS/MS Fragmentation of RRSESSGNLPSVADTR**

Found in **AKAP1\_MOUSE**, A-kinase anchor protein 1, mitochondrial OS=Mus musculus GN=Akap1  
PE=1 SV=3

Match to Query 4403: 1924.863618 from(642.628482,3+)

Title: Elution from: 29.654 to 29.654 scan no 2063 cid35.00 polarity:+:MA10:m1s

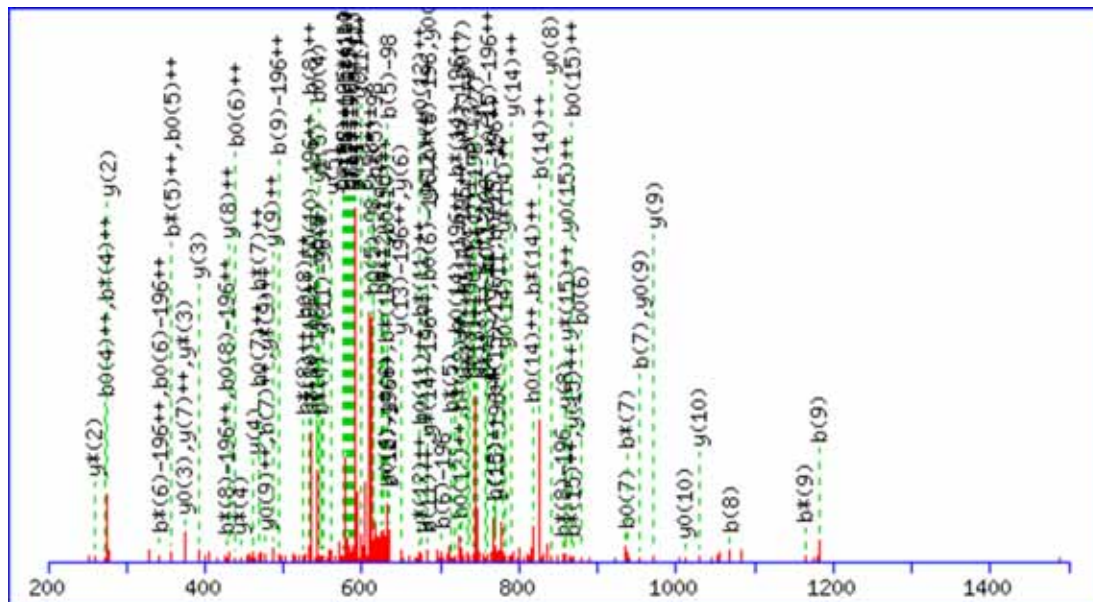

**Monoisotopic mass of neutral peptide Mr(calc):** 1924.8617

**Fixed modifications:** Carbamidomethyl (C) (apply to specified residues or termini only)

**Variable modifications:**

**N-term :** Dimethyl:2H(4)13C(2) (N-term)

**S5 :** Phospho (ST), with neutral losses 0.0000(shown in table), 97.9769

**S6 :** Phospho (ST), with neutral losses 0.0000(shown in table), 97.9769

**Ions Score:** 32 **Expect:** 0.028

**Matched b ions:** b(5)-98, b(6)-98++, b(6)-196, b(6)-98, b(7), b(7)-98, b(7)-98++, b(7)++, b(7)-196, b(8)++, b(8), b(8)-98++, b(9)++, b(9), b(9)-98++, b(9)-98, b(9)-196++, b(10)-98++, b(10)-196++, b(10)-98, b(11)++, b(11)-196++, b(11)-98++, b(12)-98++, b(12)-196++, b(12)++, b(13)++, b(13)-98++, b(14)++, b(14)-98++, b(14)-196++, b(15)-98++

**Matched y ions:** y(2), y(3), y(4), y(5), y(6), y(7)++, y(7), y(8)++, y(8), y(9), y(9)++, y(10), y(11)-98++, y(11)++, y(12)-196++, y(12)-98++, y(12)++, y(13)++, y(13)-196++, y(13)-98++, y(14)-98++, y(14)++, y(15)++, y(15)-196++

**Precursor origin neutral loss:** +

## Peptide No.782

**RRSPSPAPPPPPPPPPR**

**Confirmed sites:** @S:3,@S:5

**Ambiguous sites:**

**MS/MS Fragmentation of RRSPSPAPPPPPPPPPR**

Found in **SRRM1\_MOUSE**, Serine/arginine repetitive matrix protein 1 OS=Mus musculus GN=Srrm1 PE=1 SV=1

Match to Query 6083: 2084.013492 from(695.678440,3+)

Title: Elution from: 28.033 to 28.033 scan no 2034 cid35.00 polarity:+:MA10:m1s

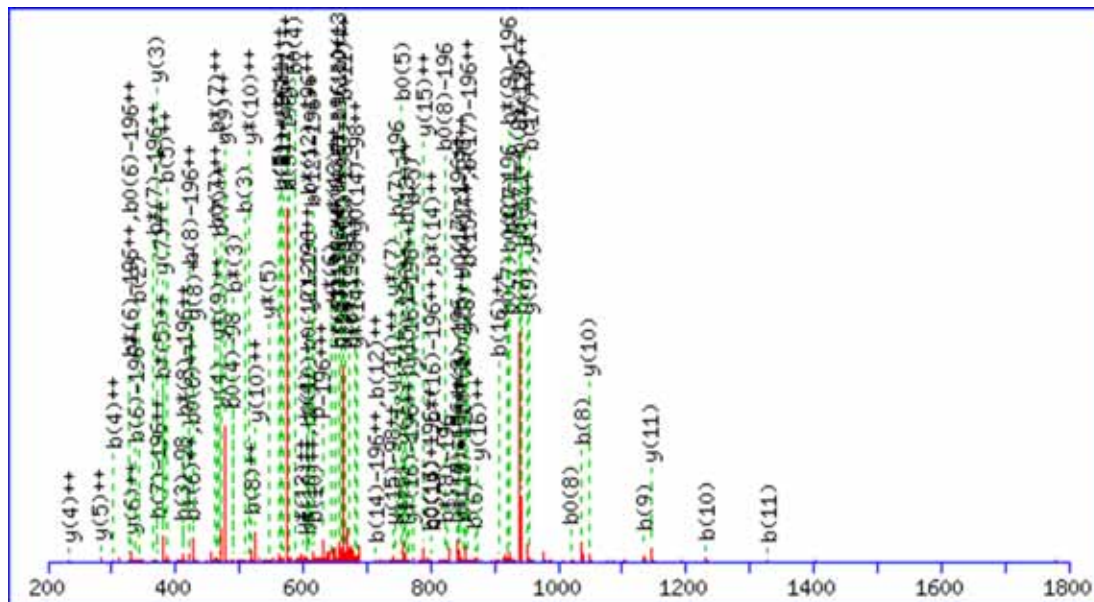

**Monoisotopic mass of neutral peptide Mr(calc):** 2084.0122

**Fixed modifications:** Carbamidomethyl (C) (apply to specified residues or termini only)

**Variable modifications:**

**N-term :** Dimethyl (N-term)

**S3 :** Phospho (ST), with neutral losses 0.0000(shown in table), 97.9769

**S5 :** Phospho (ST), with neutral losses 0.0000(shown in table), 97.9769

**Ions Score:** 70 **Expect:** 6.9e-006

**Matched b ions:** b(2), b(3)-98, b(3), b(4)++, b(4), b(5)++, b(5)-98, b(5), b(5)-98++, b(5)-196, b(6)-98++, b(6)-98, b(6)-196++, b(6)-196, b(6), b(7)-98, b(7), b(7)++, b(7)-98++, b(7)-196++, b(7)-196, b(8), b(8)-98++, b(8)-196++, b(8)++, b(8)-98, b(8)-196, b(9), b(9)-98++, b(9)-196, b(9)++, b(10)++, b(10), b(10)-98++, b(11), b(11)-98++, b(11)-196++, b(11)++, b(12)-98, b(12)-196++, b(12)-98++, b(12)++, b(13)-196++, b(13)-98++, b(13)++, b(14)-196++, b(14)-98++, b(15)-196++, b(15)++, b(16)-98++, b(16)++, b(17)++, b(17)-196++, b(17)-98++

**Matched y ions:** y(3), y(4)++, y(4), y(5)++, y(5), y(6)++, y(6), y(7)++, y(7), y(8)++, y(8), y(9)++, y(9), y(10), y(10)++, y(11)++, y(11), y(12)++, y(13)++, y(14)++, y(15)++, y(15)-98++, y(16)-98++, y(16)++, y(17)++, y(17)-98++

**Precursor origin neutral loss:** +

## Peptide No.783

**RRSPSPAPPPPPPPPPR**

**Confirmed sites:** @S:3,@S:5

**Ambiguous sites:**

MS/MS Fragmentation of **RRSPSPAPPPPPPPPPR**

Found in **SRRM1\_MOUSE**, Serine/arginine repetitive matrix protein 1 OS=Mus musculus GN=Srrm1 PE=1 SV=1

Match to Query 5617: 2090.045427 from(697.689085,3+)

Title: Elution from: 27.865 to 27.865 scan no 1862 cid35.00 polarity:+:MA10:m1s





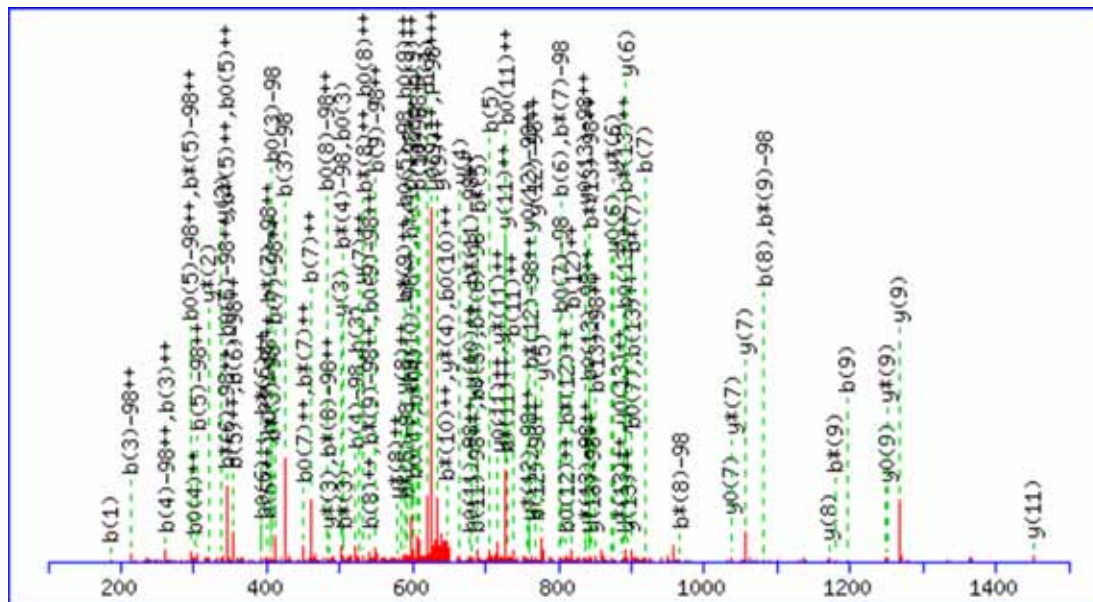

**Monoisotopic mass of neutral peptide Mr(calc):** 1971.8880

**Fixed modifications:** Carbamidomethyl (C) (apply to specified residues or termini only)

**Variable modifications:**

**N-term :** Dimethyl (N-term)

**T3 :** Phospho (ST), with neutral losses 0.0000(shown in table), 97.9769

**Ions Score:** 34 **Expect:** 0.026

**Matched b ions:** b(1), b(3)++, b(3)-98, b(3), b(3)-98++, b(4)-98++, b(4)-98, b(4), b(5)++, b(5)-98++, b(5), b(5)-98, b(6)-98++, b(6)++, b(6), b(7)++, b(7)-98++, b(7), b(8)++, b(8), b(9)-98++, b(9)++, b(9), b(10)-98++, b(11)++, b(11)-98++, b(12)++, b(12)-98++, b(13)++, b(13)-98++

**Matched y ions:** y(2), y(3), y(4), y(5), y(6), y(7), y(7)++, y(8), y(8)++, y(9), y(9)++, y(10)++, y(11)++, y(11), y(12)-98++, y(13)-98++, y(13)++

**Precursor origin neutral loss:** +

## Peptide No.785

**R RTPSPDYDLYYYR**

**Confirmed sites:** @T:3,@S:5

**Ambiguous sites:**

**MS/MS Fragmentation of** **R RTPSPDYDLYYYR**

Found in **TITIN\_MOUSE**, Titin OS=Mus musculus GN=Ttn PE=1 SV=1

Match to Query 5376: 2051.855277 from(684.959035,3+)

Title: Elution from: 44.048 to 44.048 scan no 4022 cid35.00 polarity:+:MA10:m1s

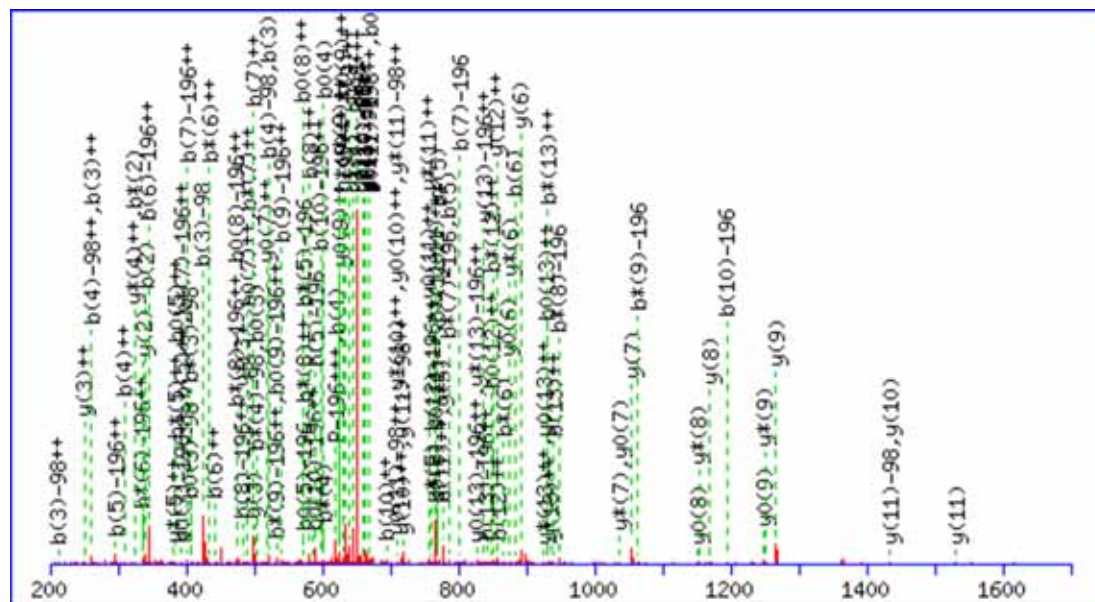

**Monoisotopic mass of neutral peptide Mr(calc):** 2051.8543

**Fixed modifications:** Carbamidomethyl (C) (apply to specified residues or termini only)

**Variable modifications:**

**N-term :** Dimethyl (N-term)

**T3 :** Phospho (ST), with neutral losses 97.9769(shown in table), 0.0000

**S5 :** Phospho (ST), with neutral losses 97.9769(shown in table), 0.0000

**Ions Score:** 40 **Expect:** 0.0046

**Matched b ions:** b(2), b(3)-98, b(3)++, b(3)-98++, b(3), b(4)-98++, b(4)-98, b(4), b(4)++, b(5)-196++, b(5)-98++, b(5)-196, b(5)++, b(5)-98, b(5), b(6)-196++, b(6)-98++, b(6)++, b(6)-98, b(6), b(7)++, b(7)-98, b(7)-98++, b(7)-196++, b(7)-196, b(8)++, b(8)-98++, b(8)-98, b(8)-196++, b(9)-98++, b(9)++, b(9)-196++, b(10)-98++, b(10)-196, b(10)-196++, b(10)++, b(11)++, b(11)-98++, b(12)++, b(12)-98++, b(12)-196++, b(13)++, b(13)-98++, b(13)-196++

**Matched y ions:** y(2), y(3), y(3)++, y(4), y(5), y(6), y(7), y(8), y(9), y(9)++, y(10), y(10)++, y(10)-98++, y(11)++, y(11)-98, y(11), y(11)-98++, y(12)-98, y(12)++, y(13)++, y(13)-196++, y(13)-98++

**Precursor origin neutral loss:** +

## Peptide No.786

**R RTPSPDYDLYYYR**

**Confirmed sites:** @T:3,@Y:8

**Ambiguous sites:**

MS/MS Fragmentation of **R RTPSPDYDLYYYR**

Found in **TITIN\_MOUSE**, Titin OS=Mus musculus GN=Ttn PE=1 SV=1

Match to Query 4978: 2051.855968 from(513.971268,4+)

Title: Elution from: 43.675 to 43.675 scan no 3921 cid35.00 polarity:+:MA10:m1s

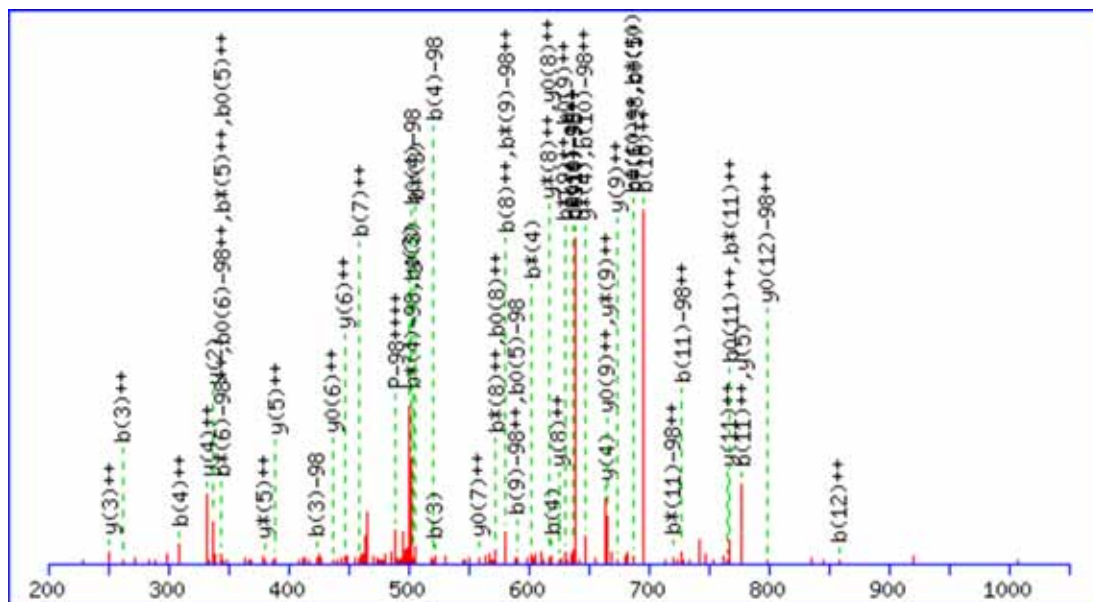

**Monoisotopic mass of neutral peptide Mr(calc):** 2051.8543

**Fixed modifications:** Carbamidomethyl (C) (apply to specified residues or termini only)

**Variable modifications:**

**N-term :** Dimethyl (N-term)

**T3 :** Phospho (ST), with neutral losses 0.0000(shown in table), 97.9769

**Y8 :** Phospho (Y)

**Ions Score:** 29 **Expect:** 0.052

**Matched b ions:** b(3)++, b(3)-98, b(3), b(4)++, b(4), b(4)-98, b(7)++, b(8)++, b(9)++, b(9)-98++, b(10)++, b(10)-98++, b(11)++, b(11)-98++, b(12)++

**Matched y ions:** y(2), y(3), y(3)++, y(4)++, y(4), y(5), y(5)++, y(6)++, y(8)++, y(9)++, y(11)++

**Precursor origin neutral loss:**

## Peptide No.787

**R RTPSPDYDLYYYR**

**Confirmed sites:** @T:3,@S:5

**Ambiguous sites:**

**MS/MS Fragmentation of RTPSPDYDLYYYR**

Found in **TITIN\_MOUSE**, Titin OS=Mus musculus GN=Ttn PE=1 SV=1

Match to Query 5239: 2057.887440 from(686.969756,3+)

Title: Elution from: 43.692 to 43.692 scan no 3957 cid35.00 polarity:+:MA10:m1s



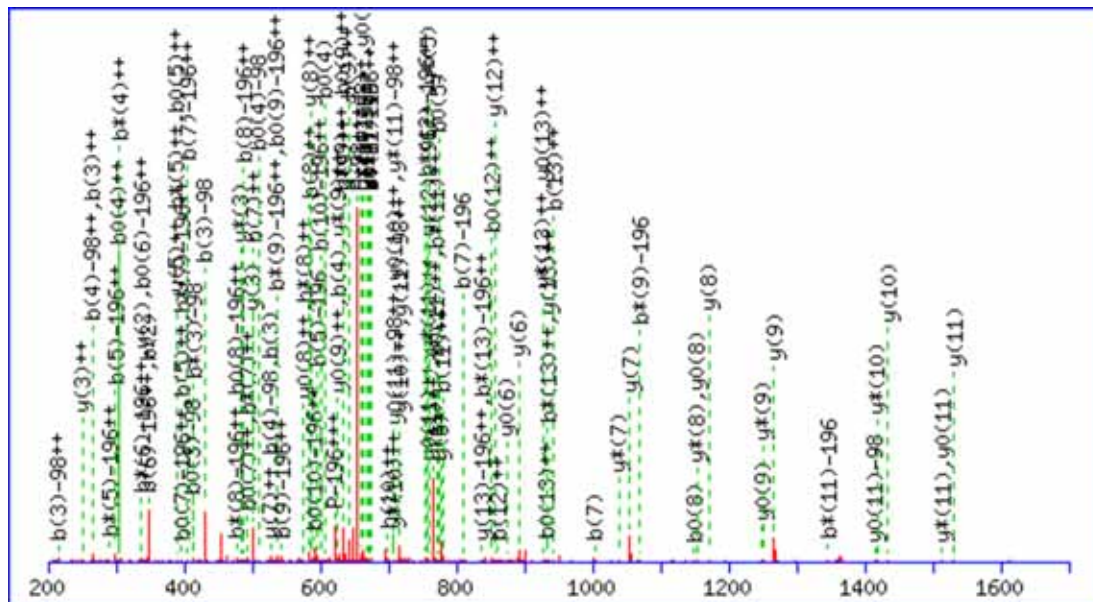

**Monoisotopic mass of neutral peptide Mr(calc):** 2057.8861

**Fixed modifications:** Carbamidomethyl (C) (apply to specified residues or termini only)

**Variable modifications:**

**N-term :** Dimethyl:2H(4)13C(2) (N-term)

**T3 :** Phospho (ST), with neutral losses 0.0000(shown in table), 97.9769

**S5 :** Phospho (ST), with neutral losses 0.0000(shown in table), 97.9769

**Ions Score:** 35 **Expect:** 0.014

**Matched b ions:** b(2), b(3)-98, b(3)++, b(3), b(3)-98++, b(4)-98++, b(4)-98, b(4), b(5)-196++, b(5)-98++, b(5)-196, b(5)++, b(5)-98, b(6)-196++, b(6)-98++, b(7)++, b(7)-98++, b(7), b(7)-196++, b(7)-196, b(8)++, b(8)-98++, b(8)-98, b(8)-196++, b(9)-98++, b(9)-196++, b(9)++, b(10)-98++, b(10)-196++, b(10)++, b(11)++, b(11)-98++, b(12)++, b(12)-98++, b(13)-98++, b(13)++

**Matched y ions:** y(2), y(3), y(3)++, y(4), y(5), y(5)++, y(6), y(7), y(7)++, y(8), y(8)++, y(9), y(9)++, y(10), y(10)++, y(10)-98++, y(11)++, y(11), y(11)-98++, y(12)-98, y(12)-196++, y(12)-98++, y(12)++, y(13)++, y(13)-196++

**Precursor origin neutral loss:** +

## Peptide No.788

**R RTPSPDYDLYYYR**

**Confirmed sites:** @T:3,@Y:8

**Ambiguous sites:**

**MS/MS Fragmentation of RTPSPDYDLYYYR**

Found in **TITIN\_MOUSE**, Titin OS=Mus musculus GN=Ttn PE=1 SV=1

Match to Query 5454: 2057.886952 from(1029.950752,2+)

Title: Elution from: 43.419 to 43.419 scan no 3954 cid35.00 polarity:+:MA10:m1s

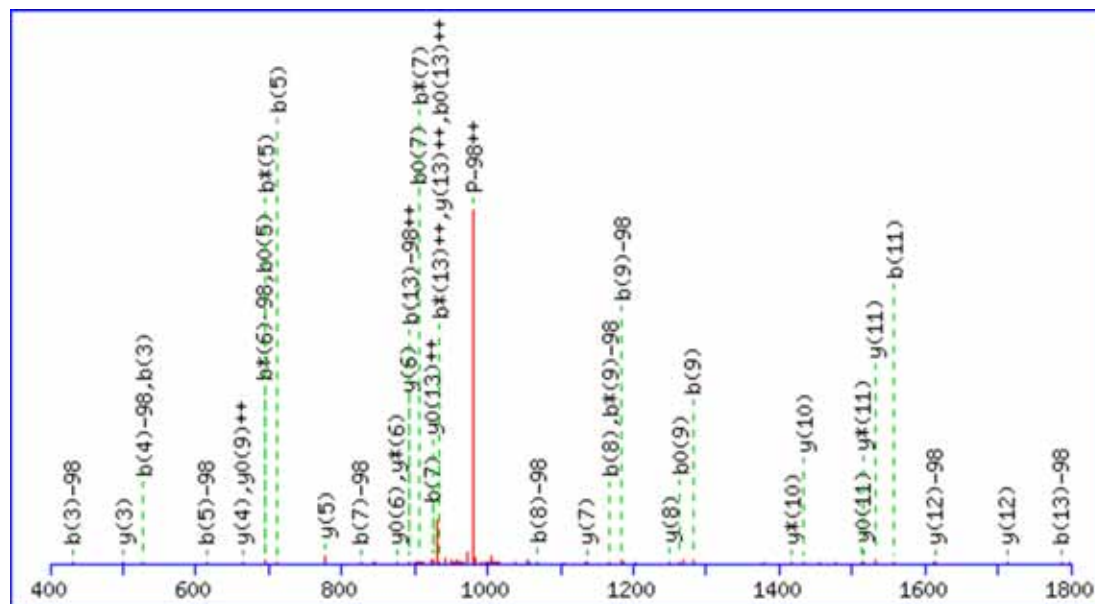

**Monoisotopic mass of neutral peptide Mr(calc):** 2057.8861

**Fixed modifications:** Carbamidomethyl (C) (apply to specified residues or termini only)

**Variable modifications:**

**N-term :** Dimethyl:2H(4)13C(2) (N-term)

**T3 :** Phospho (ST), with neutral losses 97.9769(shown in table), 0.0000

**Y8 :** Phospho (Y)

**Ions Score:** 33 **Expect:** 0.024

**Matched b ions:** b(3)-98, b(3), b(4)-98, b(5)-98, b(5), b(7), b(7)-98, b(8), b(8)-98, b(9)-98, b(9), b(11), b(13)-98, b(13)-98++

**Matched y ions:** y(3), y(4), y(5), y(6), y(7), y(8), y(10), y(11), y(12), y(12)-98, y(13)++

**Precursor origin neutral loss:** +

## Peptide No.789

**RSASPDDDLGSSNWEAADLGNEER**

**Confirmed sites:** @S:4

**Ambiguous sites:**

MS/MS Fragmentation of **RSASPDDDLGSSNWEAADLGNEER**

Found in **SMAP\_MOUSE**, Small acidic protein OS=Mus musculus GN=Smap PE=1 SV=1

Match to Query 8134: 2698.117233 from(900.379687,3+)

Title: Elution from: 47.270 to 47.270 scan no 4578 cid35.00 polarity:+:MA10:m1s

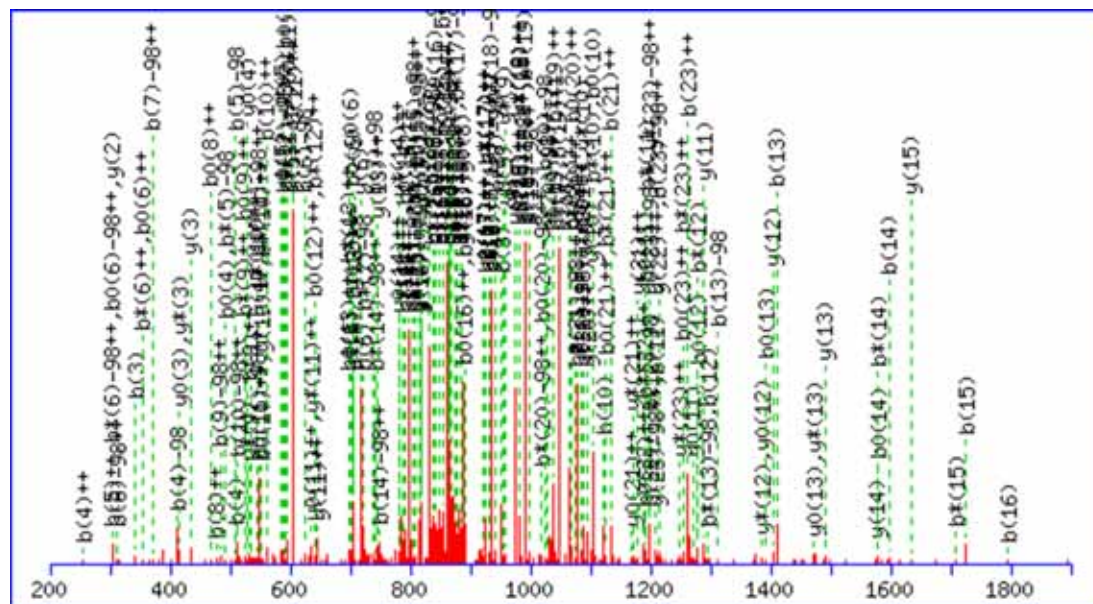

**Monoisotopic mass of neutral peptide Mr(calc):** 2698.1144

**Fixed modifications:** Carbamidomethyl (C) (apply to specified residues or termini only)

**Variable modifications:**

**N-term :** Dimethyl (N-term)

**S4 :** Phospho (ST), with neutral losses 0.0000(shown in table), 97.9769

**Ions Score:** 97 **Expect:** 1.3e-008

**Matched b ions:** b(3), b(4)-98, b(4), b(4)++, b(5)++, b(5)-98, b(6), b(6)-98, b(6)-98++, b(7)-98, b(7)-98++, b(7), b(7)-98, b(8)-98, b(8), b(8)++, b(9), b(9)-98, b(9)-98++, b(9)++, b(10)++, b(10), b(10)-98, b(10)-98++, b(10)-98, b(11)++, b(12)-98, b(12), b(13), b(13)++, b(13)-98, b(14)++, b(14), b(14)-98, b(14)-98++, b(15)++, b(15), b(15)-98, b(16), b(16)-98, b(16)-98++, b(17)++, b(17)-98, b(17)-98++, b(18)++, b(18)-98, b(18)-98++, b(19)++, b(19)-98, b(19)-98++, b(20)++, b(20)-98, b(20)-98++, b(21)++, b(21)-98, b(21)-98++, b(22)++, b(23)++, b(23)-98

**Matched y ions:** y(2), y(3), y(4), y(5), y(6), y(7), y(9), y(10), y(10)++, y(11)++, y(11), y(12), y(12)++, y(13)++, y(13), y(14), y(14)++, y(15)++, y(15), y(16)++, y(17)++, y(20)++, y(21)++, y(22)++, y(23)-98

**Precursor origin neutral loss:**

## Peptide No.790

**RSASPDDDLGSSNWEAADLGNEER**

**Confirmed sites:** @S:11

**Ambiguous sites:**

MS/MS Fragmentation of **RSASPDDDLGSSNWEAADLGNEER**

Found in **SMAP\_MOUSE**, Small acidic protein OS=Mus musculus GN=Smap PE=1 SV=1

Match to Query 7094: 2704.147917 from(902.389915,3+)

Title: Elution from: 47.199 to 47.199 scan no 4363 cid35.00 polarity:+:MA10:m1s

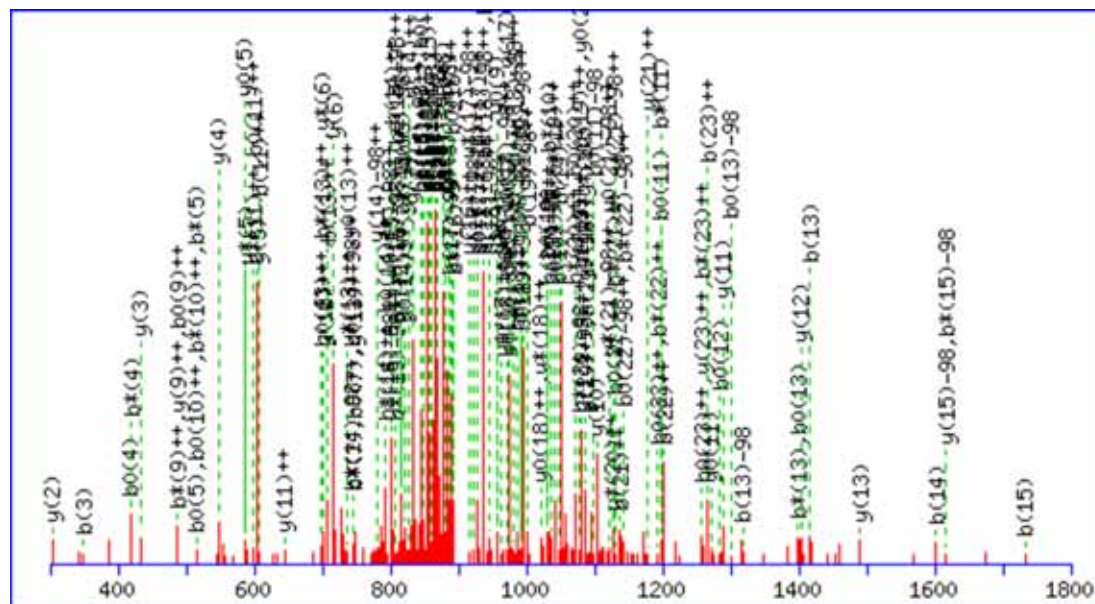

**Monoisotopic mass of neutral peptide Mr(calc):** 2704.1462

**Fixed modifications:** Carbamidomethyl (C) (apply to specified residues or termini only)

**Variable modifications:**

**N-term :** Dimethyl:2H(4)13C(2) (N-term)

**S11 :** Phospho (ST), with neutral losses 0.0000(shown in table), 97.9769

**Ions Score:** 71 **Expect:** 5.4e-006

**Matched b ions:** b(3), b(8), b(10), b(11)++, b(13), b(13)++, b(13)-98, b(14), b(14)++, b(15)++, b(15), b(15)-98++, b(16)-98++, b(17)++, b(17)-98++, b(18)++, b(18)-98++, b(19)++, b(19)-98++, b(20)++, b(20)-98++, b(21)++, b(21)-98++, b(22)++, b(23)++

**Matched y ions:** y(2), y(3), y(4), y(5), y(6), y(7), y(9)++, y(9), y(10), y(11), y(11)++, y(12), y(12)++, y(13), y(13)++, y(14)-98++, y(14)++, y(15)-98, y(15)-98++, y(15)++, y(16)-98++, y(16)++, y(17)-98++, y(17)++, y(18)-98++, y(19)++, y(19)-98++, y(20)-98++, y(21)-98++, y(21)++, y(23)++

**Precursor origin neutral loss:** +

## Peptide No.791

**RSDSAPPSPVSATVPEEEPPAPR**

**Confirmed sites:** @S:4,@S:8

**Ambiguous sites:**

MS/MS Fragmentation of **RSDSAPPSPVSATVPEEEPPAPR**

Found in **JPH2\_MOUSE**, Junctophilin-2 OS=Mus musculus GN=Jph2 PE=1 SV=2

Match to Query 8253: 2560.126374 from(854.382734,3+)

Title: Elution from: 39.111 to 39.111 scan no 3513 cid35.00 polarity:+:MA10:m1s



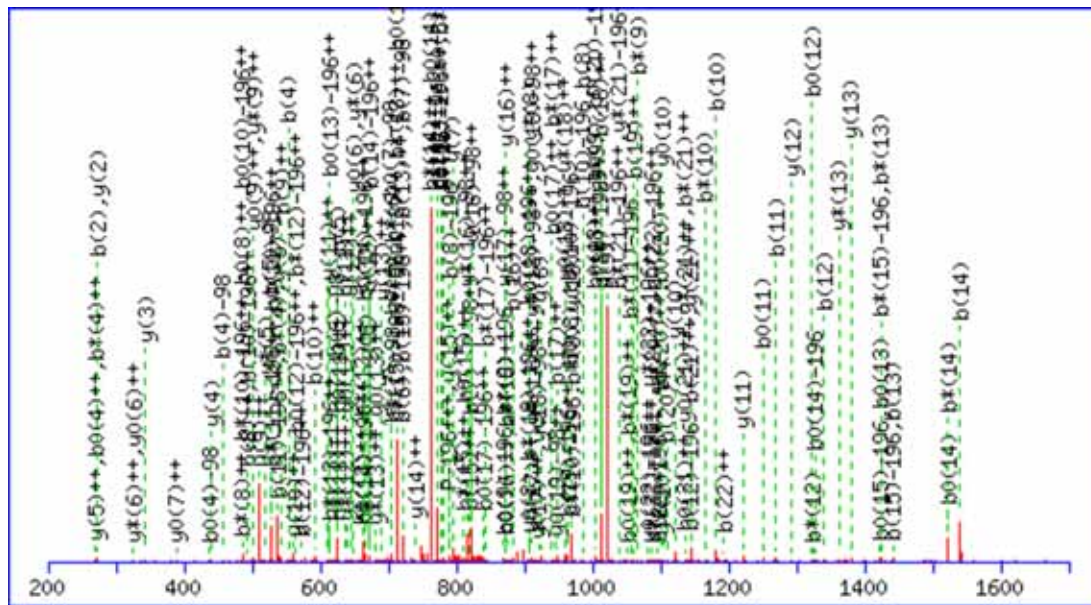

**Monoisotopic mass of neutral peptide Mr(calc):** 2560.1247

**Fixed modifications:** Carbamidomethyl (C) (apply to specified residues or termini only)

**Variable modifications:**

**N-term :** Dimethyl (N-term)

**S4 :** Phospho (ST), with neutral losses 0.0000(shown in table), 97.9769

**S8 :** Phospho (ST), with neutral losses 0.0000(shown in table), 97.9769

**Ions Score:** 55 **Expect:** 0.00023

**Matched b ions:** b(2), b(4)-98, b(4), b(5), b(5)-98, b(6), b(6)-98, b(7)-98, b(7), b(8)-98, b(8)++, b(8)-196, b(8), b(9)++, b(9)-98++, b(9)-98, b(10), b(10)++, b(10)-98++, b(10)-196++, b(10)-196, b(10)-98, b(11), b(11)-196++, b(11)++, b(12), b(12)-98, b(12)++, b(12)-196++, b(12)-98++, b(12)-196, b(13)++, b(13), b(13)-98++, b(14)++, b(14), b(14)-98, b(14)-98++, b(14)-196++, b(15)-98++, b(15)-98, b(15)-196++, b(15)-196, b(15)++, b(16)++, b(16)-98++, b(17)-98++, b(17)++, b(18)++, b(18)-98++, b(19)-98++, b(19)-196++, b(19)++, b(20)++, b(20)-196++, b(20)-98++, b(21)++, b(21)-98++, b(22)-98++, b(22)-196++, b(22)++

**Matched y ions:** y(2), y(3), y(4), y(5), y(5)++, y(6), y(7), y(8), y(9)++, y(9), y(10), y(10)++, y(11), y(11)++, y(12)++, y(12), y(13), y(13)++, y(14)++, y(15)++, y(16)-98++, y(16)++, y(17)-98++, y(17)++, y(18)++, y(18)-98++, y(19)++, y(20)++, y(20)-98++, y(21)++, y(21)-98++

**Precursor origin neutral loss:**

## Peptide No.792

**RSNSVDTGPSSSLSTPTEPLSPTSSLGEER**

**Confirmed sites:** @S:2,@S:25

**Ambiguous sites:**

MS/MS Fragmentation of **RSNSVDTGPSSSLSTPTEPLSPTSSLGEER**

Found in **GYS1\_MOUSE**, Glycogen [starch] synthase, muscle OS=Mus musculus GN=Gys1 PE=1 SV=2

Match to Query 8707: 3262.430268 from(1088.484032,3+)

Title: Elution from: 47.510 to 47.510 scan no 4607 cid35.00 polarity:+:MA10:m1s



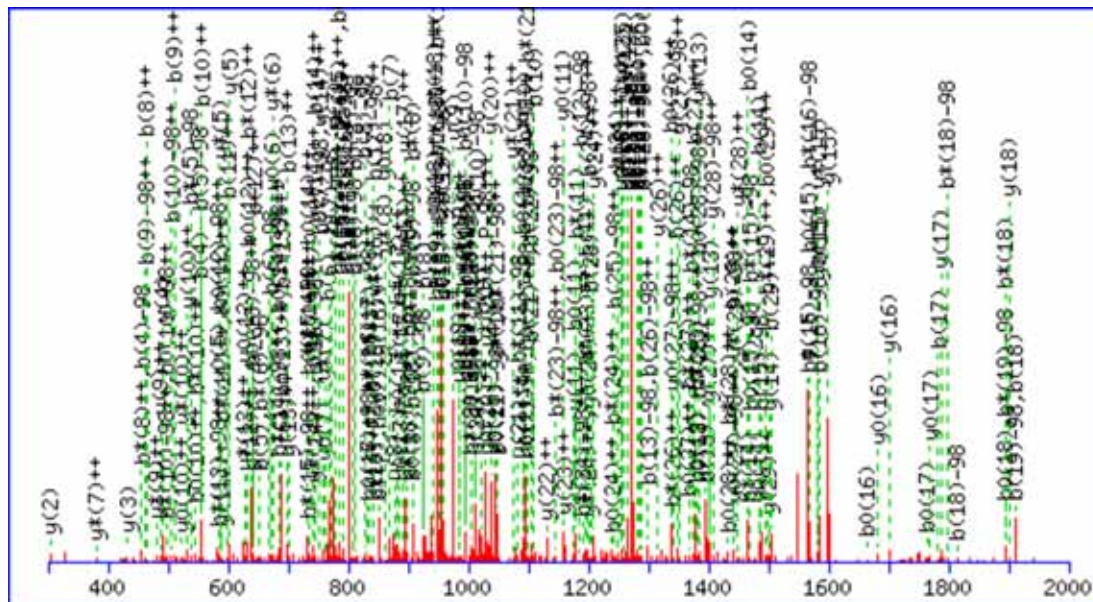

**Monoisotopic mass of neutral peptide Mr(calc):** 3182.4616

**Fixed modifications:** Carbamidomethyl (C) (apply to specified residues or termini only)

**Variable modifications:**

**N-term :** Dimethyl (N-term)

**S4 :** Phospho (ST), with neutral losses 0.0000(shown in table), 97.9769

**Ions Score:** 85 **Expect:** 3.2e-007

**Matched b ions:** b(4)-98, b(4), b(5)-98, b(5), b(6), b(6)-98, b(7), b(7)-98, b(8)++, b(8)-98, b(8), b(9)-98++, b(9), b(9)++, b(9)-98, b(10)-98++, b(10)++, b(10)-98, b(10), b(11), b(11)++, b(11)-98, b(12)++, b(12)-98, b(12), b(13), b(13)++, b(13)-98, b(14), b(14)++, b(15)-98, b(15), b(15)-98++, b(15)++, b(16)-98, b(16)-98++, b(16)++, b(17)++, b(17)-98++, b(17), b(18)++, b(18), b(18)-98, b(18)-98++, b(19)-98++, b(19)-98, b(19)++, b(20)-98++, b(21)++, b(22)-98++, b(23)++, b(24)-98++, b(24)++, b(25)-98++, b(26)++, b(26)-98++, b(27)++, b(28)++, b(29)++

**Matched y ions:** y(2), y(3), y(4), y(5), y(6), y(7), y(8), y(9), y(9)++, y(10)++, y(11)++, y(11), y(12), y(12)++, y(13), y(13)++, y(14)++, y(14), y(15)++, y(15), y(16), y(16)++, y(17)++, y(17), y(18), y(18)++, y(19)++, y(20)++, y(21)++, y(22)++, y(23)++, y(24)++, y(25)++, y(26)++, y(27)-98++, y(27)++, y(28)-98++, y(29)++

**Precursor origin neutral loss:** +

## Peptide No.794

**RSNSVDTGPSSSLSTPTEPLSPTSSLGEERN**

**Confirmed sites:** @S:2

**Ambiguous sites:**

MS/MS Fragmentation of **RSNSVDTGPSSSLSTPTEPLSPTSSLGEERN**

Found in **GYS1\_MOUSE**, Glycogen [starch] synthase, muscle OS=Mus musculus GN=Gys1 PE=1 SV=2

Match to Query 7518: 3296.495151 from(1099.838993,3+)

Title: Elution from: 47.790 to 47.790 scan no 4431 cid35.00 polarity:+:MA10



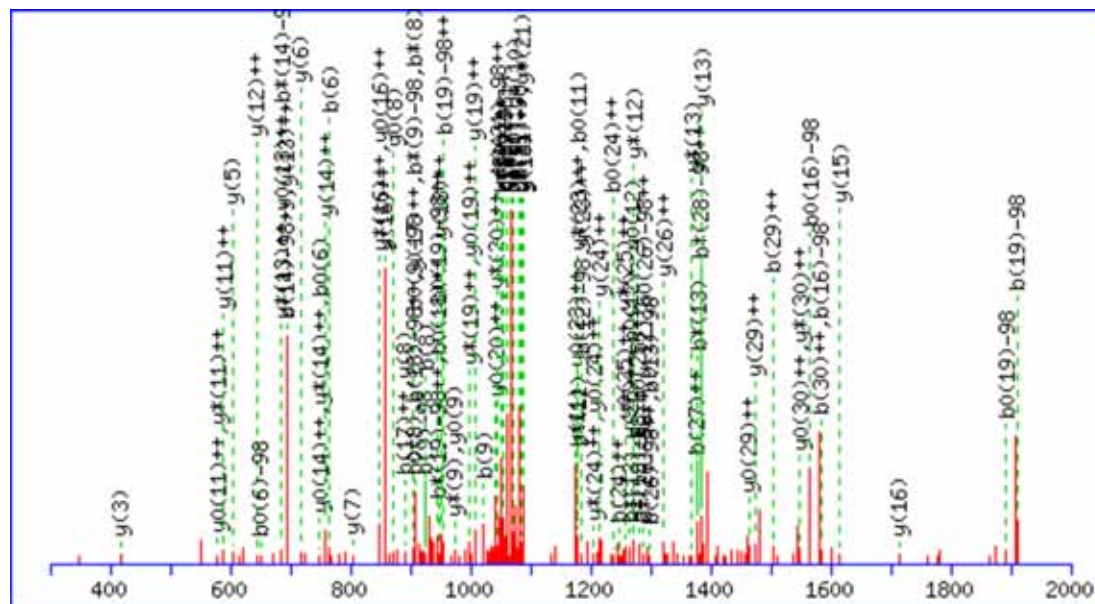

**Monoisotopic mass of neutral peptide Mr(calc):** 3296.5045

**Fixed modifications:** Carbamidomethyl (C) (apply to specified residues or termini only)

**Variable modifications:**

**N-term :** Dimethyl (N-term)

**S2 :** Phospho (ST), with neutral losses 0.0000(shown in table), 97.9769

**Ions Score:** 37 **Expect:** 0.021

**Matched b ions:** b(6), b(8), b(9), b(9)-98, b(12)-98, b(13)-98, b(14)-98++, b(16)-98, b(17)++, b(18)-98++, b(19)-98, b(19)-98++, b(20)++, b(21)-98++, b(24)++, b(26)-98++, b(27)++, b(29)++, b(30)++  
**Matched y ions:** y(3), y(5), y(6), y(7), y(8), y(10), y(11), y(11)++, y(12)++, y(12), y(13)++, y(13), y(14)++, y(15), y(16)++, y(16), y(17)++, y(18)++, y(19)++, y(20)++, y(23)++, y(24)++, y(25)++, y(26)++, y(29)++  
**Precursor origin neutral loss:** +

## Peptide No.795

**RSNSVDTGPSSSLSTPTEPLSPTSSLGEERN**

**Confirmed sites:**

**Ambiguous sites:** @S:2orS:4, @T:23orS:24orS:25

MS/MS Fragmentation of **RSNSVDTGPSSSLSTPTEPLSPTSSLGEERN**

Found in **GYS1\_MOUSE**, Glycogen [starch] synthase, muscle OS=Mus musculus GN=Gys1 PE=1 SV=2

Match to Query 8764: 3376.472094 from(1126.497974,3+)

Title: Elution from: 47.123 to 47.123 scan no 4561 cid35.00 polarity:+:MA10:m1s



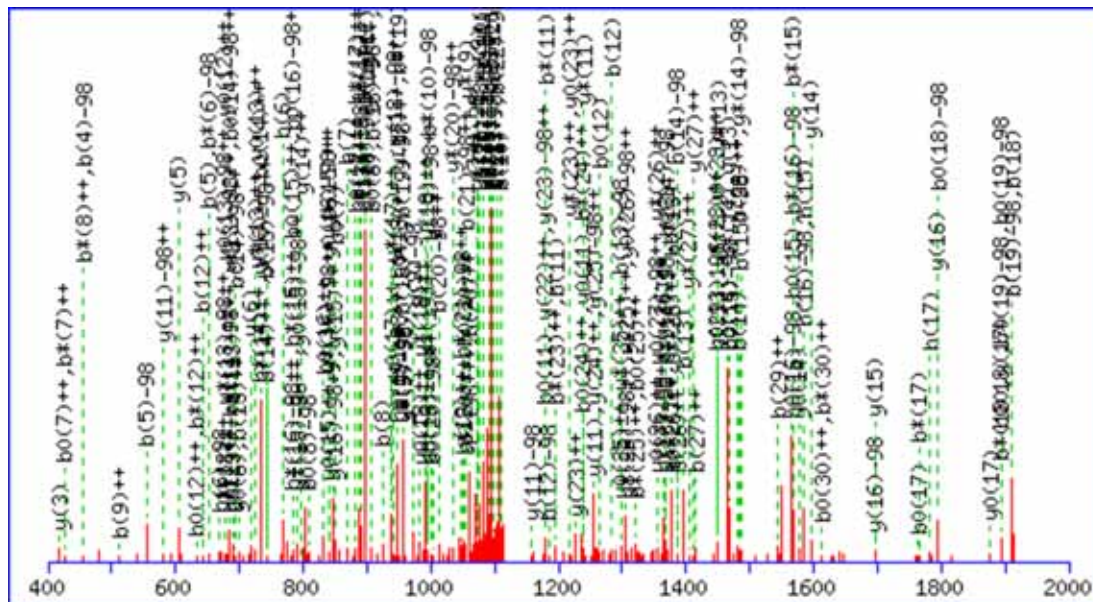

**Monoisotopic mass of neutral peptide Mr(calc):** 3376.4709

**Fixed modifications:** Carbamidomethyl (C) (apply to specified residues or termini only)

**Variable modifications:**

**N-term :** Dimethyl (N-term)

**S2 :** Phospho (ST), with neutral losses 0.0000(shown in table), 97.9769

**S25 :** Phospho (ST), with neutral losses 0.0000(shown in table), 97.9769

**Ions Score:** 67 **Expect:** 2e-005

**Matched b ions:** b(4)-98, b(5)-98, b(5), b(6), b(6)-98, b(7), b(8), b(9)++, b(10), b(11), b(11)-98, b(12)-98, b(12)++, b(12), b(13), b(13)++, b(13)-98, b(14), b(14)-98++, b(14)++, b(14)-98, b(15), b(15)-98, b(15)-98++, b(16)-98, b(17), b(17)++, b(18)++, b(18), b(18)-98++, b(19)-98++, b(19)-98, b(20)++, b(20)-98++, b(21)-98++, b(21)++, b(22)-98++, b(26)++, b(27)++, b(28)++, b(29)++, b(29)-196++

**Matched y ions:** y(3), y(5), y(6), y(9)-98, y(9), y(10)-98, y(11), y(11)-98++, y(11)-98, y(12)++, y(12), y(13)-98++, y(13)++, y(13), y(13)-98, y(14), y(14)++, y(15), y(15)++, y(16)++, y(16), y(16)-98++, y(16)-98, y(17)++, y(17), y(17)-98++, y(18)++, y(18)-98++, y(19)-98++, y(19)++, y(20)++, y(22)++, y(23)-98++, y(23)++, y(24)++, y(25)-98++, y(25)++, y(26)++, y(27)-98++, y(27)++, y(30)-98++

**Precursor origin neutral loss:** +

## Peptide No.796

**RSNSVDTGPSSSLSTPTEPLSPTSSLGEERN**

**Confirmed sites:** @S:4

**Ambiguous sites:**

MS/MS Fragmentation of **RSNSVDTGPSSSLSTPTEPLSPTSSLGEERN**

Found in **GYS1\_MOUSE**, Glycogen [starch] synthase, muscle OS=Mus musculus GN=Gys1 PE=1 SV=2

Match to Query 8733: 3296.503641 from(1099.841823,3+)

Title: Elution from: 44.770 to 44.770 scan no 4277 cid35.00 polarity:+:MA10:m1s



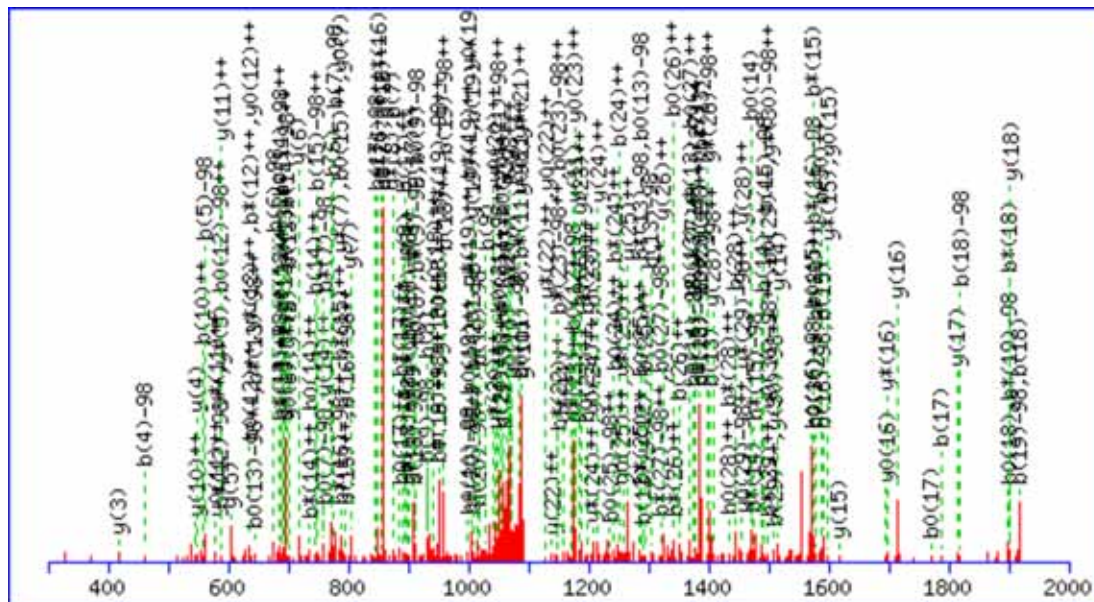

**Monoisotopic mass of neutral peptide Mr(calc):** 3302.5363

**Fixed modifications:** Carbamidomethyl (C) (apply to specified residues or termini only)

**Variable modifications:**

**N-term :** Dimethyl:2H(4)13C(2) (N-term)

**S4 :** Phospho (ST), with neutral losses 0.0000(shown in table), 97.9769

**Ions Score:** 52 **Expect:** 0.00068

**Matched b ions:** b(4)-98, b(5)-98, b(6), b(6)-98, b(7)-98, b(7), b(8), b(9)-98, b(9), b(10)++, b(10)-98, b(12), b(13), b(13)++, b(13)-98, b(14), b(14)-98++, b(14)++, b(15), b(15)-98++, b(15)++, b(15)-98, b(16)-98, b(16)-98++, b(17), b(17)-98++, b(17)++, b(18), b(18)++, b(18)-98, b(18)-98++, b(19)-98, b(19)-98++, b(19)++, b(20)++, b(20)-98++, b(21)-98++, b(23)++, b(24)++, b(25)++, b(26)++, b(27)++, b(28)++, b(29)++, b(30)++

**Matched y ions:** y(3), y(4), y(5), y(6), y(7), y(8), y(10), y(10)++, y(11), y(11)++, y(12), y(13)++, y(13), y(14), y(14)++, y(15), y(16)++, y(16), y(17), y(17)++, y(18)++, y(18), y(19)++, y(20)++, y(22)++, y(23)++, y(24)++, y(25)++, y(26)++, y(27)++, y(28)++, y(28)-98++, y(30)-98++

**Precursor origin neutral loss:** +

## Peptide No.798

**RSSGREEDDEELLR**

**Confirmed sites:** @S:3

**Ambiguous sites:**

MS/MS Fragmentation of **RSSGREEDDEELLR**

Found in **ABLM1\_MOUSE**, Actin-binding LIM protein 1 OS=Mus musculus GN=Ablim1 PE=1 SV=1

Match to Query 3461: 1811.804838 from(906.909695,2+)

Title: Elution from: 30.364 to 30.364 scan no 2173 cid35.00 polarity:+:MA10



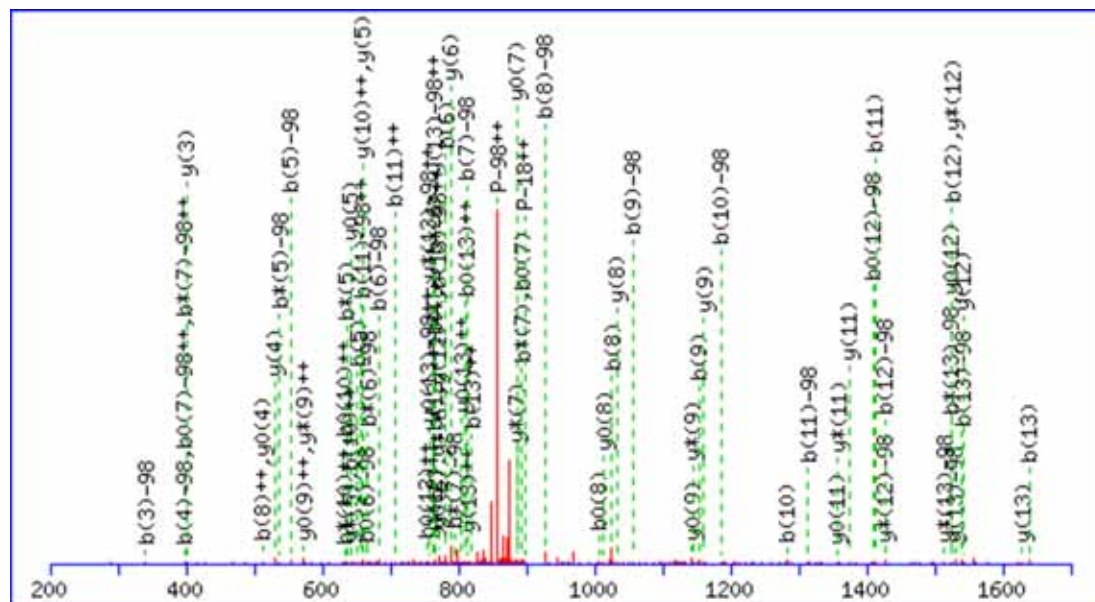

**Monoisotopic mass of neutral peptide Mr(calc):** 1811.8050

**Fixed modifications:** Carbamidomethyl (C) (apply to specified residues or termini only)

**Variable modifications:**

**N-term :** Dimethyl (N-term)

**S3 :** Phospho (ST), with neutral losses 97.9769(shown in table), 0.0000

**Ions Score:** 42 **Expect:** 0.0028

**Matched b ions:** b(3)-98, b(4)-98, b(5)-98, b(5), b(6)-98, b(6), b(7)-98, b(8), b(8)-98, b(8)++, b(9), b(9)-98, b(10), b(10)-98, b(10)++, b(11), b(11)-98, b(11)-98++, b(11)++, b(12)-98, b(12), b(12)++, b(13), b(13)-98++, b(13)-98, b(13)++

**Matched y ions:** y(3), y(4), y(5), y(6), y(8), y(9), y(10)++, y(11), y(12)++, y(12), y(13), y(13)-98, y(13)-98++, y(13)++

**Precursor origin neutral loss:** +

## Peptide No.799

**RSSGREEDEEELLR**

**Confirmed sites:**

**Ambiguous sites:** @S:2orS:3

MS/MS Fragmentation of **RSSGREEDEEELLR**

Found in **ABLM1\_MOUSE**, Actin-binding LIM protein 1 OS=Mus musculus GN=Ablim1 PE=1 SV=1

Match to Query 3529: 1817.836560 from(455.466416,4+)

Title: Elution from: 30.585 to 30.585 scan no 2184 cid35.00 polarity:+:MA10:m1s



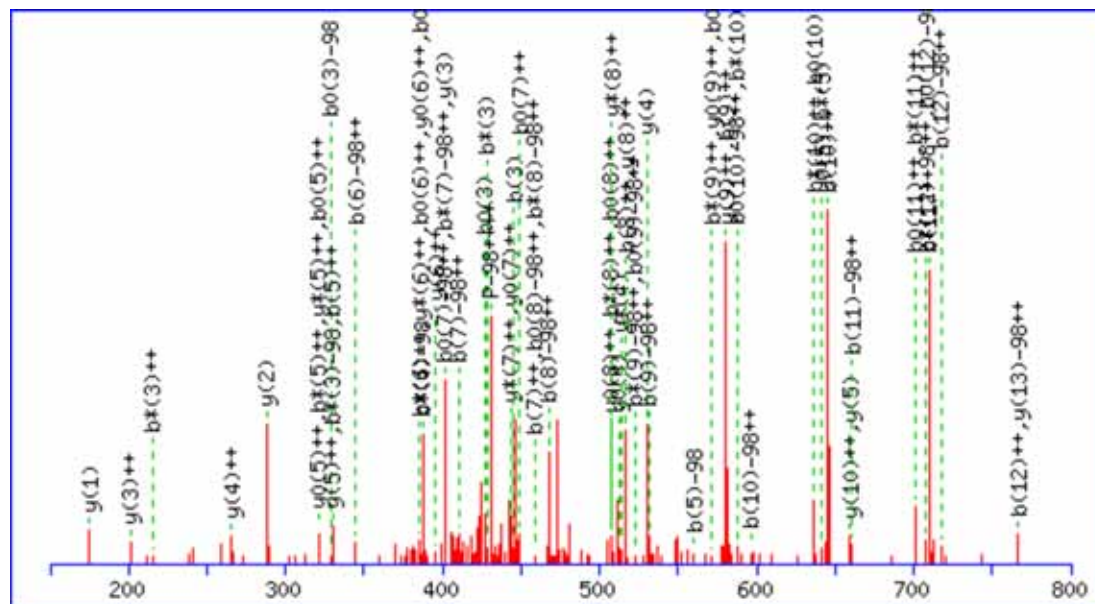

**Monoisotopic mass of neutral peptide Mr(calc):** 1817.8368

**Fixed modifications:** Carbamidomethyl (C) (apply to specified residues or termini only)

**Variable modifications:**

**N-term :** Dimethyl:2H(4)13C(2) (N-term)

**S3 :** Phospho (ST), with neutral losses 0.0000(shown in table), 97.9769

**Ions Score:** 46 **Expect:** 0.0013

**Matched b ions:** b(3), b(5)++, b(5)-98, b(6)-98++, b(7)-98++, b(7)++, b(8)++, b(8)-98++, b(9)++, b(9)-98++, b(10)++, b(10)-98++, b(11)++, b(11)-98++, b(12)++, b(12)-98++

**Matched y ions:** y(1), y(2), y(3), y(3)++, y(4), y(4)++, y(5)++, y(5), y(6)++, y(8)++, y(9)++, y(10)++, y(13)-98++

**Precursor origin neutral loss:** +

## Peptide No.800

**RSSQPSPTTVPASDSPPAK**

**Confirmed sites:** @S:3,@S:6

**Ambiguous sites:**

MS/MS Fragmentation of **RSSQPSPTTVPASDSPPAK**

Found in **MA7D1\_MOUSE**, MAP7 domain-containing protein 1 OS=Mus musculus GN=Map7d1 PE=1 SV=1

Match to Query 6235: 2124.950529 from(709.324119,3+)

Title: Elution from: 27.725 to 27.725 scan no 1992 cid35.00 polarity:+MA10:m1s



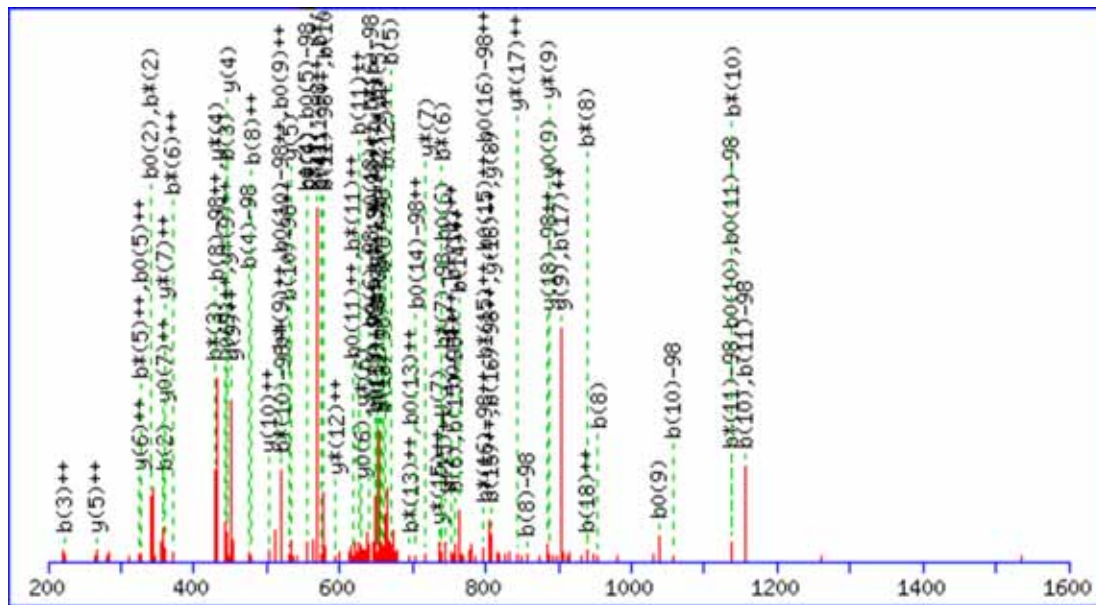

**Monoisotopic mass of neutral peptide Mr(calc):** 2057.0467

**Fixed modifications:** Carbamidomethyl (C) (apply to specified residues or termini only)

**Variable modifications:**

**N-term :** Dimethyl:2H(4)13C(2) (N-term)

**S2 :** Phospho (ST), with neutral losses 0.0000(shown in table), 97.9769

**K19 :** Dimethyl:2H(4)13C(2) (K)

**Ions Score:** 32 **Expect:** 0.043

**Matched b ions:** b(2), b(3)++, b(3), b(4)-98, b(4), b(5), b(6), b(6)-98, b(8)-98, b(8)++, b(8)-98, b(8)++, b(10), b(10)++, b(10)-98, b(10)-98, b(10)-98++, b(11)-98, b(11)-98, b(11)-98++, b(11)++, b(12)++, b(13)-98, b(13)-98++, b(14)++, b(15)++, b(15)-98, b(15)-98++, b(16)-98, b(16)-98++, b(17)++, b(18)++

**Matched y ions:** y(4), y(5)++, y(5), y(6), y(6)++, y(7), y(8), y(9), y(9)++, y(10)++, y(13)++, y(15)++, y(16)++, y(18)-98

**Precursor origin neutral loss:** +

## Peptide No.802

**RSSQPSPTTVPASDSPPAK**

**Confirmed sites:**

**Ambiguous sites:** @T:8orT:9

**MS/MS Fragmentation of RSSQPSPTTVPASDSPPAK**

Found in **MA7D1\_MOUSE**, MAP7 domain-containing protein 1 OS=Mus musculus GN=Map7d1 PE=1 SV=1

Match to Query 5252: 2057.049135 from(686.690321,3+)

Title: Elution from: 26.339 to 26.339 scan no 1630 cid35.00 polarity:+:MA10:m1s

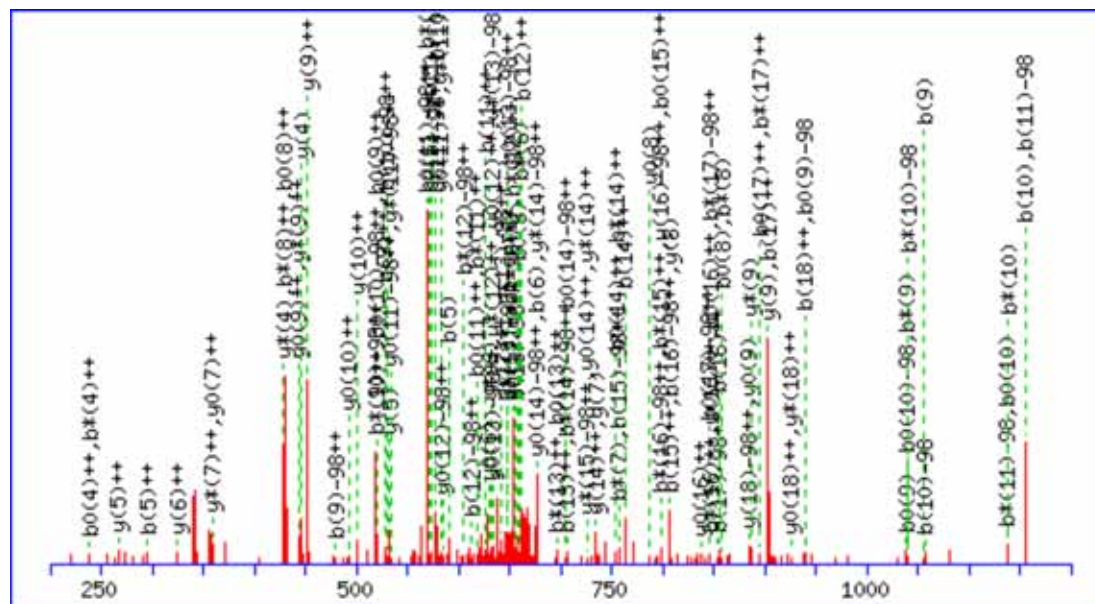

**Monoisotopic mass of neutral peptide Mr(calc):** 2057.0467

**Fixed modifications:** Carbamidomethyl (C) (apply to specified residues or termini only)

**Variable modifications:**

**N-term :** Dimethyl:2H(4)13C(2) (N-term)

**T9 :** Phospho (ST), with neutral losses 0.0000(shown in table), 97.9769

**K19 :** Dimethyl:2H(4)13C(2) (K)

**Ions Score:** 34 **Expect:** 0.025

**Matched b ions:** b(5)++, b(5), b(6), b(9)++, b(9), b(9)-98++, b(10), b(10)++, b(10)-98, b(10)-98++, b(11)-98, b(11)-98++, b(11)++, b(12)++, b(12)-98++, b(13)-98++, b(13)++, b(14)++, b(15)++, b(15)-98++, b(16)-98++, b(16)++, b(17)++, b(17)-98++, b(18)++

**Matched y ions:** y(4), y(5)++, y(5), y(6)++, y(6), y(7), y(8), y(9), y(9)++, y(10)++, y(12)++, y(13)-98++, y(14)++, y(16)-98++, y(16)++, y(18)-98++

**Precursor origin neutral loss:** +

## Peptide No.803

**RSSVNGEAGVPPPR**

**Confirmed sites:** @S:3

**Ambiguous sites:**

**MS/MS Fragmentation of RSSVNGEAGVPPPR**

Found in **EH1L1\_MOUSE**, EH domain-binding protein 1-like protein 1 OS=Mus musculus GN=Ehbp111 PE=2 SV=1

Match to Query 2417: 1626.788652 from(543.270160,3+)

Title: Elution from: 25.233 to 25.233 scan no 1508 cid35.00 polarity:+:MA10



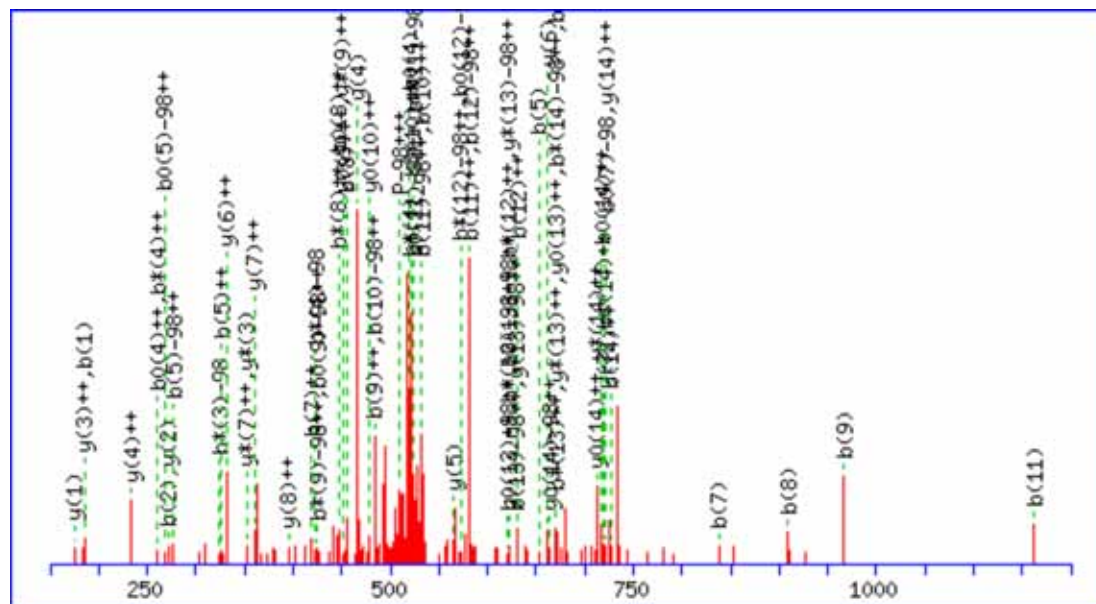

**Monoisotopic mass of neutral peptide Mr(calc):** 1626.7879

**Fixed modifications:** Carbamidomethyl (C) (apply to specified residues or termini only)

**Variable modifications:**

**N-term :** Dimethyl (N-term)

**S3 :** Phospho (ST), with neutral losses 0.0000(shown in table), 97.9769

**Ions Score:** 38 **Expect:** 0.0071

**Matched b ions:** b(1), b(2), b(5)-98++, b(5)++, b(5), b(7), b(7)++, b(8)++, b(8), b(9), b(9)++, b(10)++, b(10)-98++, b(11)++, b(11), b(11)-98++, b(12)-98++, b(12)++, b(13)-98++, b(14)++

**Matched y ions:** y(1), y(2), y(3)++, y(4)++, y(4), y(5), y(6)++, y(6), y(7)++, y(7), y(8)++, y(13)-98++, y(14)++

**Precursor origin neutral loss:**

## Peptide No.804

**RSSVSGISLEDNR**

**Confirmed sites:** @S:3

**Ambiguous sites:**

**MS/MS Fragmentation of** **RSSVSGISLEDNR**

Found in **PDLI4\_MOUSE**, PDZ and LIM domain protein 4 OS=Mus musculus GN=Pdlim4 PE=1 SV=2

Match to Query 2693: 1526.709668 from(764.362110,2+)

Title: Elution from: 32.692 to 32.692 scan no 2673 cid35.00 polarity:+:MA10



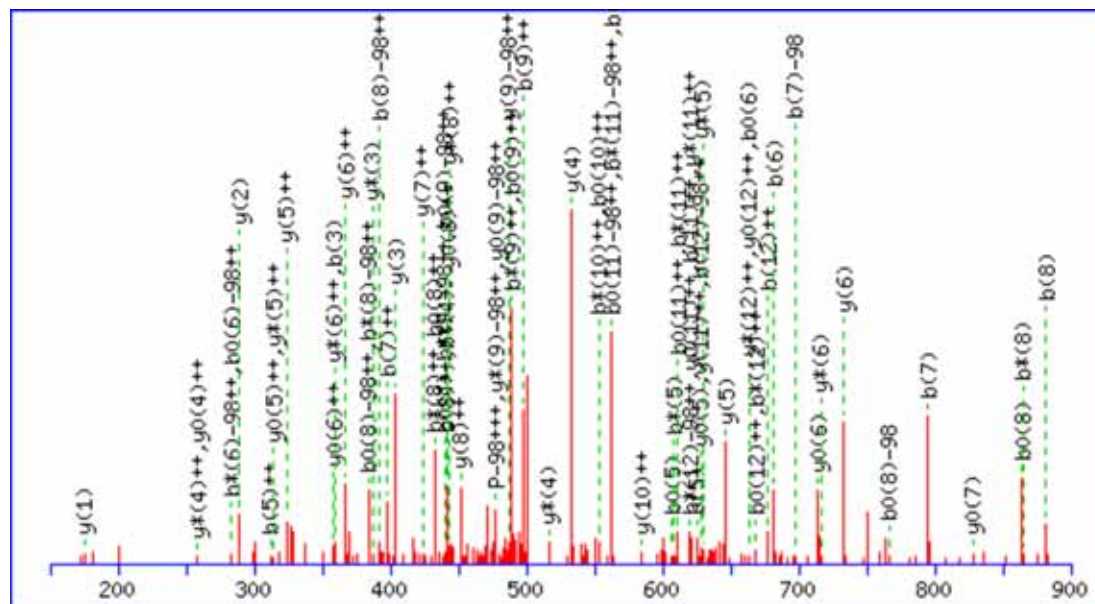

**Monoisotopic mass of neutral peptide Mr(calc):** 1526.7090

**Fixed modifications:** Carbamidomethyl (C) (apply to specified residues or termini only)

**Variable modifications:**

**N-term :** Dimethyl (N-term)

**S5 :** Phospho (ST), with neutral losses 0.0000(shown in table), 97.9769

**Ions Score:** 43 **Expect:** 0.0019

**Matched b ions:** b(3), b(5), b(5)++, b(6), b(7), b(7)++, b(7)-98, b(8), b(8)++, b(8)-98++, b(9)++, b(10)++, b(11)++, b(12)++, b(12)-98++

**Matched y ions:** y(1), y(2), y(3), y(4), y(5), y(5)++, y(6)++, y(6), y(7)++, y(8)++, y(9)-98++, y(10)++, y(11)++

**Precursor origin neutral loss:**

## Peptide No.806

**RTEARSSDEENGPPSSPDLDR**

**Confirmed sites:** @S:6,@S:7,@S:16

**Ambiguous sites:**

**MS/MS Fragmentation of RTEARSSDEENGPPSSPDLDR**

Found in **AKT1\_MOUSE**, Proline-rich AKT1 substrate 1 OS=Mus musculus GN=Akt1s1 PE=1 SV=1

Match to Query 7818: 2581.974612 from(861.665480,3+)

Title: Elution from: 29.658 to 29.658 scan no 2258 cid35.00 polarity:+:MA10:m1s

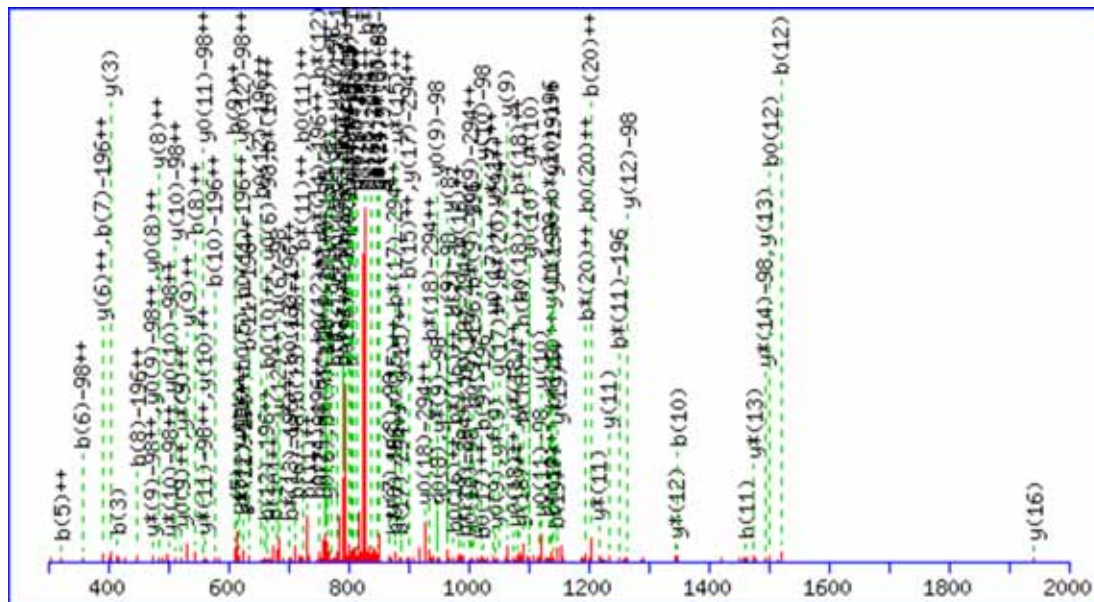

**Monoisotopic mass of neutral peptide Mr(calc):** 2581.9724

**Fixed modifications:** Carbamidomethyl (C) (apply to specified residues or termini only)

**Variable modifications:**

**N-term :** Dimethyl (N-term)

**S6 :** Phospho (ST), with neutral losses 0.0000(shown in table), 97.9769

**S7 :** Phospho (ST), with neutral losses 0.0000(shown in table), 97.9769

**S16 :** Phospho (ST), with neutral losses 0.0000(shown in table), 97.9769

**Ions Score:** 43 **Expect:** 0.0013

**Matched b ions:** b(3), b(5)++, b(6)-98++, b(6), b(6)-98, b(7)-196++, b(7)-196, b(7)-98, b(7), b(8)-98++, b(8), b(8)-196++, b(8)++, b(9)-98++, b(9)++, b(9)-196, b(9)-98, b(10), b(10)++, b(10)-98++, b(10)-196++, b(11)-98++, b(11)++, b(11)-196++, b(12), b(12)++, b(12)-98, b(12)-98++, b(12)-196++, b(13)-98++, b(13)++, b(13)-196++, b(14)-98++, b(15)-196++, b(15)-98++, b(15)++, b(16)-98++, b(16)++, b(16)-294++, b(16)-196++, b(17)-196++, b(17)-98++, b(17)-294++, b(18)++, b(18)-98++, b(19)++, b(19)-98++, b(19)-196++, b(20)++, b(20)-98++, b(20)-196++

**Matched y ions:** y(3), y(5), y(6)++, y(6)-98, y(6), y(7)-98, y(7), y(8), y(8)++, y(8)-98, y(9)++, y(9)-98, y(10), y(10)++, y(10)-98++, y(10)-98, y(11), y(11)++, y(11)-98, y(12)++, y(12)-98, y(13), y(14)++, y(15)-196++, y(15)-98++, y(15)++, y(16), y(17)-294++, y(17)-196++, y(17)++, y(18)++, y(18)-196++, y(19)-294++, y(19)++, y(20)-196++

**Precursor origin neutral loss:** +

## Peptide No.807

**RTEDQVNCLTQMPSSIHSDGESN**

**Confirmed sites:** @S:14

**Ambiguous sites:**

MS/MS Fragmentation of **RTEDQVNCLTQMPSSIHSDGESN**

Found in **LRC39\_MOUSE**, Leucine-rich repeat-containing protein 39 OS=Mus musculus GN=Lrrc39 PE=2 SV=1

Match to Query 8194: 2728.111482 from(910.377770,3+)



Title: Elution from: 34.903 to 34.903 scan no 2975 cid35.00 polarity:+:MA10:m1s

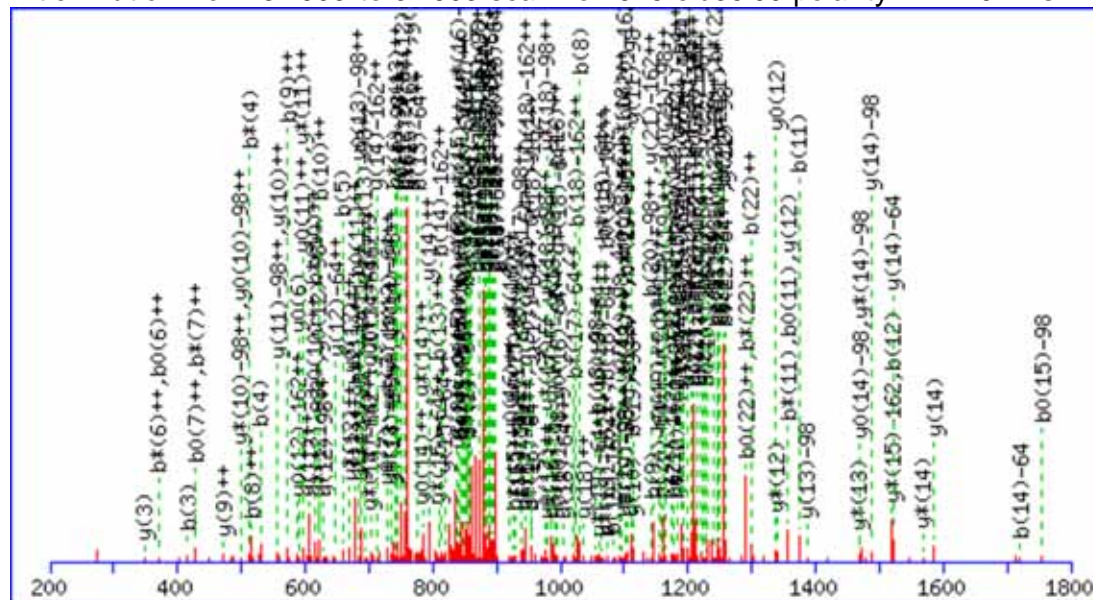

**Monoisotopic mass of neutral peptide Mr(calc):** 2728.1106

**Fixed modifications:** Carbamidomethyl (C) (apply to specified residues or termini only)

**Variable modifications:**

**N-term :** Dimethyl (N-term)

**M12 :** Oxidation (M), with neutral losses 0.0000(shown in table), 63.9983

**S14 :** Phospho (ST), with neutral losses 0.0000(shown in table), 97.9769

**Ions Score:** 67 **Expect:** 1e-005

**Matched b ions:** b(3), b(4), b(5), b(6), b(7), b(8)++, b(8), b(9), b(9)++, b(10)++, b(10), b(11), b(11)++, b(12)++, b(12), b(13)++, b(14)-98++, b(14)++, b(15)-98++, b(16)-98++, b(16)++, b(18)++, b(18)-98++, b(19)++, b(19)-98++, b(20)++, b(20)-98++, b(21)++, b(21)-98++, b(22)++, b(22)-98++

**Matched y ions:** y(3), y(8), y(9)++, y(9), y(10)++, y(10), y(11)++, y(11), y(11)-98++, y(11)-98, y(12)++, y(12), y(12)-98, y(12)-98++, y(13)-98, y(13)++, y(13)-98++, y(14), y(14)-98, y(14)++, y(14)-98++, y(15)++, y(16)-98++, y(16)++, y(17)++, y(17)-98++, y(18)-98++, y(18)++, y(19)++, y(20)++, y(21)-98++, y(21)++, y(22)-98++

**Precursor origin neutral loss:** +

## Peptide No.808

**RTEDQVNCLTQMPSSIHSDGESN**

**Confirmed sites:** @S:15

**Ambiguous sites:**

MS/MS Fragmentation of **RTEDQVNCLTQMPSSIHSDGESN**

Found in **LRC39\_MOUSE**, Leucine-rich repeat-containing protein 39 OS=Mus musculus GN=Lrrc39 PE=2 SV=1

Match to Query 6425: 2728.113153 from(910.378327,3+)

Title: Elution from: 34.648 to 34.648 scan no 2728 cid35.00 polarity:+:MA10:m1s

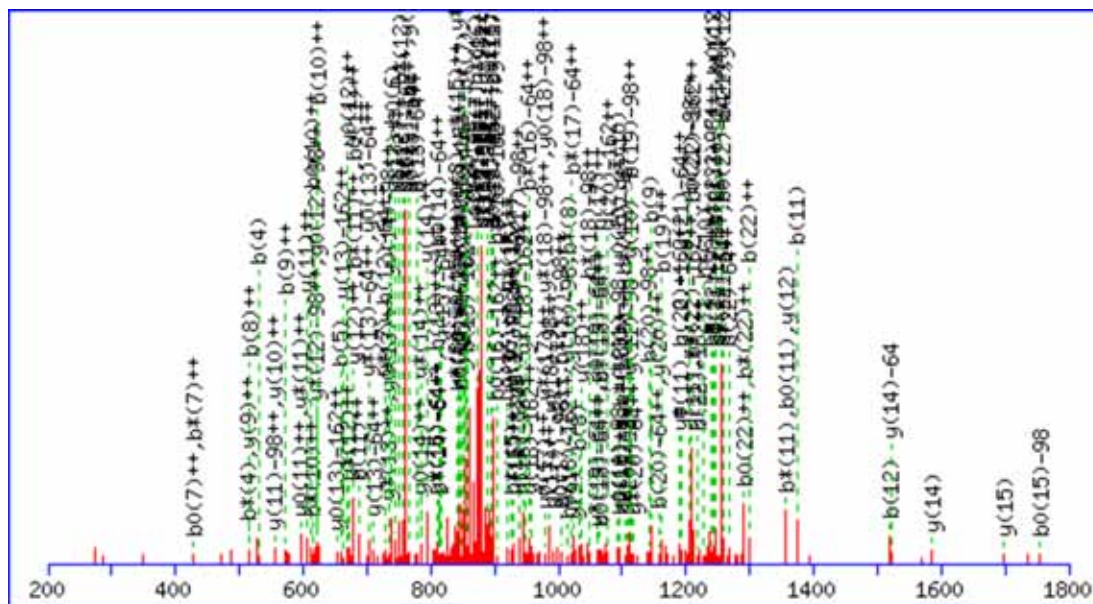

**Monoisotopic mass of neutral peptide Mr(calc):** 2728.1106

**Fixed modifications:** Carbamidomethyl (C) (apply to specified residues or termini only)

**Variable modifications:**

**N-term :** Dimethyl (N-term)

**M12 :** Oxidation (M), with neutral losses 0.0000(shown in table), 63.9983

**S15 :** Phospho (ST), with neutral losses 0.0000(shown in table), 97.9769

**Ions Score:** 42 **Expect:** 0.0033

**Matched b ions:** b(4), b(5), b(6), b(7), b(8)++, b(8), b(9), b(9)++, b(10)++, b(10), b(11), b(11)++, b(12)++, b(12), b(13)++, b(14)++, b(15)-98++, b(16)-98++, b(17)++, b(18)++, b(19)++, b(19)-98++, b(20)++, b(20)-98++, b(21)++, b(21)-98++, b(22)++

**Matched y ions:** y(8), y(9), y(9)++, y(9)-98, y(10)++, y(10), y(10)-98, y(11)-98++, y(11)++, y(11)-98, y(12)++, y(12)-98, y(13)++, y(14), y(14)++, y(15), y(15)++, y(16)-98++, y(16)++, y(17)++, y(17)-98++, y(18)-98++, y(18)++, y(20)-98++, y(20)++

**Precursor origin neutral loss:** +

## Peptide No.809

**RTEDQVNCLTQMPSSIHSDGESN**

**Confirmed sites:** @S:18,@S:22

**Ambiguous sites:**

MS/MS Fragmentation of **RTEDQVNCLTQMPSSIHSDGESN**

Found in **LRC39\_MOUSE**, Leucine-rich repeat-containing protein 39 OS=Mus musculus GN=Lrrc39 PE=2 SV=1

Match to Query 8301: 2808.077166 from(937.032998,3+)

Title: Elution from: 37.827 to 37.827 scan no 3376 cid35.00 polarity:+:MA10:m1s

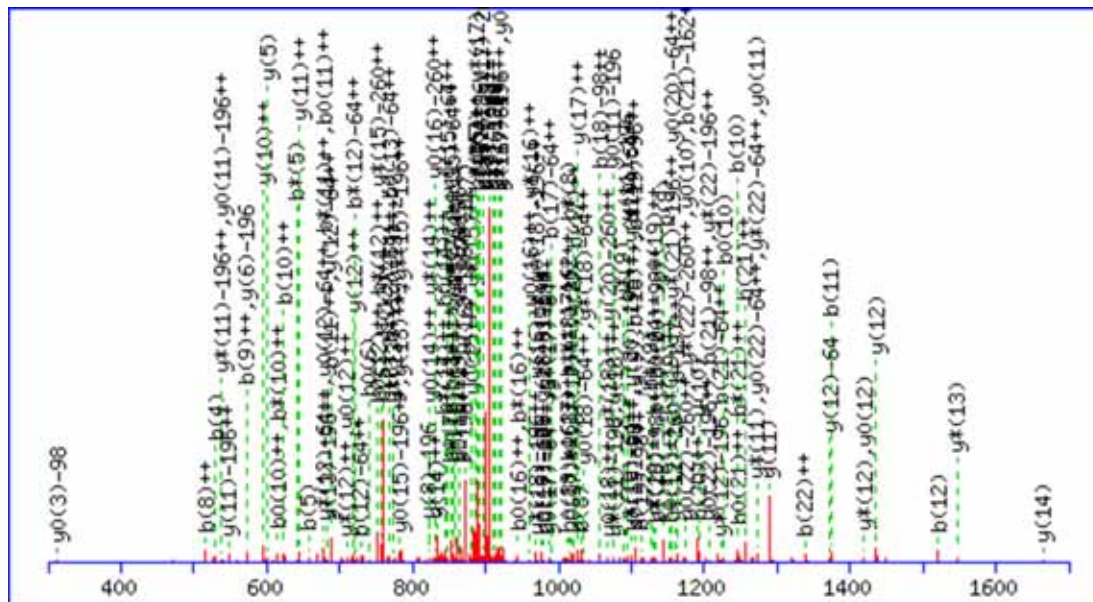

**Monoisotopic mass of neutral peptide Mr(calc):** 2808.0769

**Fixed modifications:** Carbamidomethyl (C) (apply to specified residues or termini only)

**Variable modifications:**

**N-term :** Dimethyl (N-term)

**M12 :** Oxidation (M), with neutral losses 0.0000(shown in table), 63.9983

**S18 :** Phospho (ST), with neutral losses 0.0000(shown in table), 97.9769

**S22 :** Phospho (ST), with neutral losses 0.0000(shown in table), 97.9769

**Ions Score:** 70 **Expect:** 3.2e-006

**Matched b ions:** b(4), b(5), b(6), b(7), b(8)++, b(8), b(9), b(9)++, b(10)++, b(10), b(11)++, b(11), b(12)++, b(12), b(14)++, b(15)++, b(17)++, b(18)++, b(18)-98++, b(19)++, b(19)-98++, b(20)++, b(21)++, b(21)-98++, b(22)-98++, b(22)++

**Matched y ions:** y(5), y(6)-196, y(6)-98, y(6), y(7), y(7)-98, y(8)-98, y(8), y(8)-196, y(9), y(9)-196, y(9)-98, y(10)++, y(10), y(10)-98++, y(10)-98, y(11)-98++, y(11)-98, y(11), y(11)++, y(11)-196++, y(11)-196, y(12), y(12)-98, y(12)-98++, y(12)++, y(13)++, y(13)-98++, y(13)-196++, y(14), y(14)-98++, y(14)++, y(15)-98++, y(15)++, y(16)-196++, y(16)-98++, y(16)++, y(17)++, y(17)-98++, y(18)-98++, y(18)-196++, y(18)++, y(20)-196++, y(22)-98++

**Precursor origin neutral loss:** +

## Peptide No.810

**RTPSLLEQEVKPKSTELEYLGPDEND**

**Confirmed sites:** @S:4

**Ambiguous sites:**

MS/MS Fragmentation of **RTPSLLEQEVKPKSTELEYLGPDEND**

Found in **GTR4\_MOUSE**, Solute carrier family 2, facilitated glucose transporter member 4 OS=Mus musculus GN=Slc2a4 PE=1 SV=2

Match to Query 7221: 2994.412614 from(999.144814,3+)

Title: Elution from: 56.811 to 56.811 scan no 5357 cid35.00 polarity:+:MA10:m1s



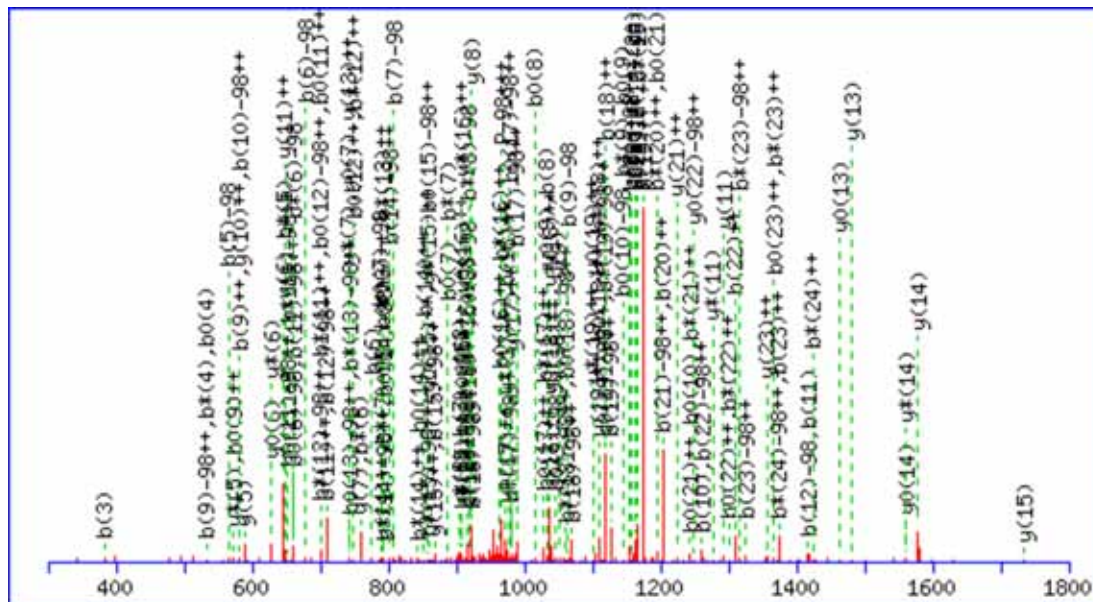

**Monoisotopic mass of neutral peptide Mr(calc):** 2994.4110

**Fixed modifications:** Carbamidomethyl (C) (apply to specified residues or termini only)

**Variable modifications:**

**N-term :** Dimethyl (N-term)

**S4 :** Phospho (ST), with neutral losses 97.9769(shown in table), 0.0000

**K11 :** Dimethyl (K)

**Ions Score:** 78 **Expect:** 1.6e-006

**Matched b ions:** b(3), b(5)-98, b(6), b(6)-98, b(7), b(7)-98, b(8), b(9)-98++, b(9), b(9)++, b(9)-98, b(10), b(10)-98++, b(10)-98, b(11)++, b(11), b(11)-98++, b(12)-98++, b(12)-98, b(14)-98++, b(14)++, b(15)++, b(15)-98++, b(16)++, b(16)-98++, b(17)++, b(17)-98++, b(18)++, b(18)-98++, b(19)++, b(19)-98++, b(20)++, b(20)-98++, b(21)-98++, b(22)++, b(22)-98++, b(23)++, b(23)-98++

**Matched y ions:** y(5), y(6), y(7), y(8), y(9), y(10)++, y(10), y(11), y(11)++, y(13), y(13)++, y(14), y(14)++, y(15), y(15)++, y(16)++, y(17)++, y(18)++, y(19)++, y(20)++, y(21)++, y(23)++

**Precursor origin neutral loss:** +

## Peptide No.811

**RTPSLLEQEVKPKSTLEYLGPDEND**

**Confirmed sites:** @S:4

**Ambiguous sites:**

MS/MS Fragmentation of **RTPSLLEQEVKPKSTLEYLGPDEND**

Found in **GTR4\_MOUSE**, Solute carrier family 2, facilitated glucose transporter member 4 OS=Mus musculus GN=Slc2a4 PE=1 SV=2

Match to Query 6677: 3006.474426 from(1003.165418,3+)

Title: Elution from: 56.627 to 56.627 scan no 5158 cid35.00 polarity:+:MA10:m1s





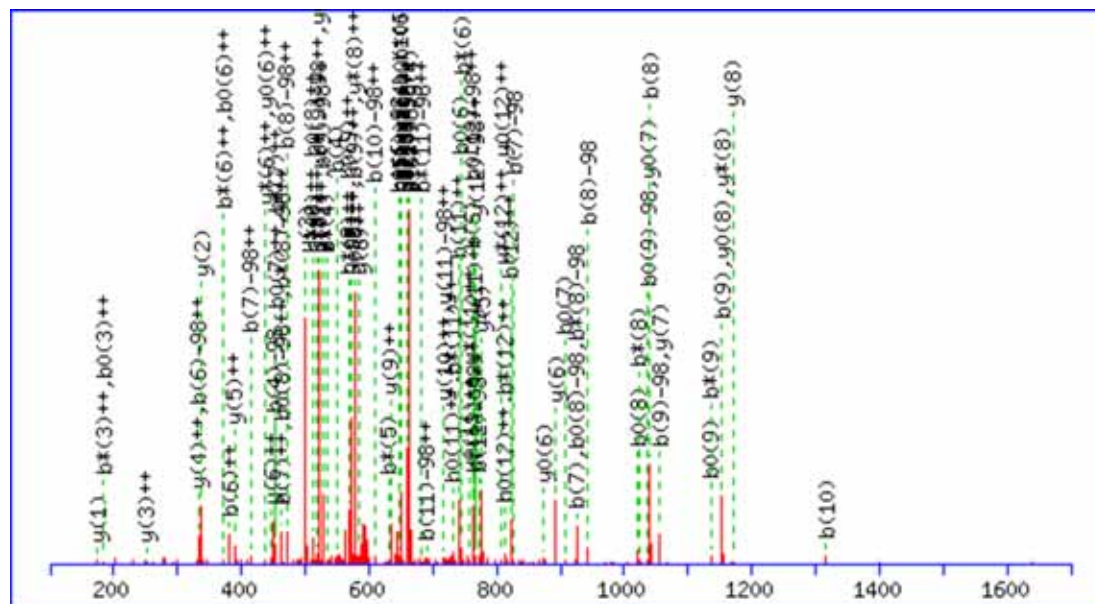

**Monoisotopic mass of neutral peptide Mr(calc):** 1815.7869

**Fixed modifications:** Carbamidomethyl (C) (apply to specified residues or termini only)

**Variable modifications:**

**N-term :** Dimethyl (N-term)

**S4 :** Phospho (ST), with neutral losses 97.9769(shown in table), 0.0000

**Ions Score:** 48 **Expect:** 0.0008

**Matched b ions:** b(4)-98, b(4), b(5), b(6)-98, b(6)-98++, b(6), b(6)++, b(7)++, b(7), b(7)-98, b(7)-98++, b(8)++, b(8), b(8)-98++, b(8)-98, b(9), b(9)++, b(9)-98, b(9)-98++, b(10), b(10)++, b(10)-98++, b(11)++, b(11)-98++, b(12)++, b(12)-98++

**Matched y ions:** y(1), y(2), y(3), y(3)++, y(4), y(4)++, y(5), y(5)++, y(6), y(6)++, y(7), y(7)++, y(8), y(8)++, y(9)++, y(10)++, y(11)++, y(11)-98++, y(12)-98++

**Precursor origin neutral loss:** +

## Peptide No.813

**RTPSPDYDLYYYR**

**Confirmed sites:** @T:2

**Ambiguous sites:**

**MS/MS Fragmentation of RTPSPDYDLYYYR**

Found in **TITIN\_MOUSE**, Titin OS=Mus musculus GN=Ttn PE=1 SV=1

Match to Query 3512: 1815.788370 from(606.270066,3+)

Title: Elution from: 45.458 to 45.458 scan no 4157 cid35.00 polarity:+:MA10:m1s

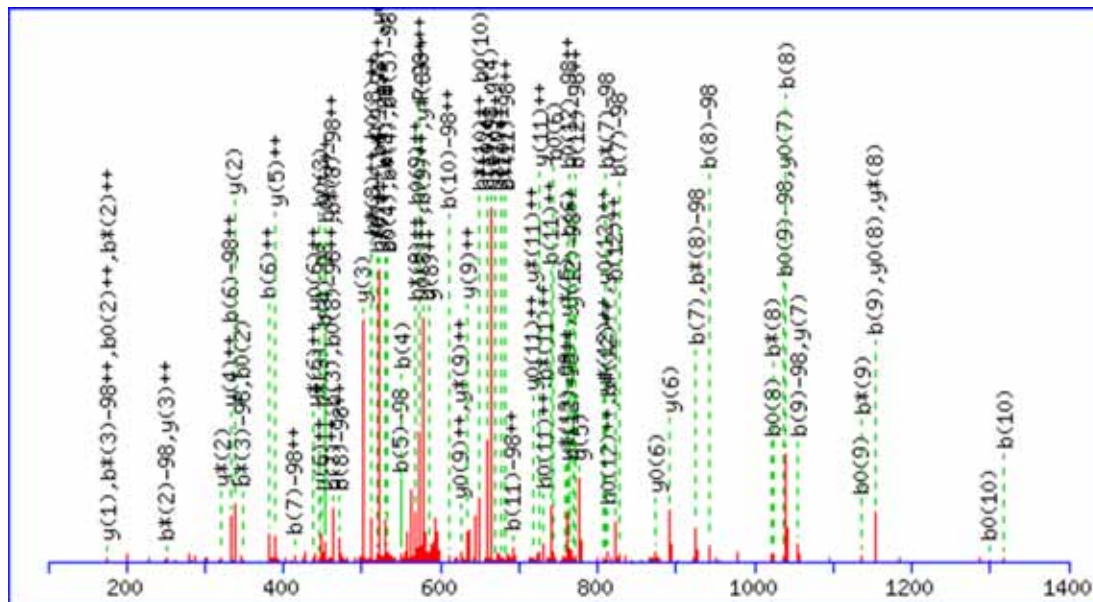

**Monoisotopic mass of neutral peptide Mr(calc):** 1815.7869

**Fixed modifications:** Carbamidomethyl (C) (apply to specified residues or termini only)

**Variable modifications:**

**N-term :** Dimethyl (N-term)

**T2 :** Phospho (ST), with neutral losses 0.0000(shown in table), 97.9769

**Ions Score:** 47 **Expect:** 0.00096

**Matched b ions:** b(3), b(4)-98, b(4), b(5)-98, b(6)-98, b(6)-98++, b(6)++, b(6), b(7)++, b(7), b(7)-98, b(7)-98++, b(8)++, b(8), b(8)-98, b(8)-98++, b(9), b(9)++, b(9)-98, b(9)-98++, b(10), b(10)++, b(10)-98++, b(11)++, b(11)-98++, b(12)++, b(12)-98++

**Matched y ions:** y(1), y(2), y(3), y(3)++, y(4), y(4)++, y(5), y(5)++, y(6), y(6)++, y(7), y(7)++, y(8)++, y(9)++, y(10)++, y(11)++, y(12)-98++

**Precursor origin neutral loss:** +

## Peptide No.814

**RTPSPDYDLYYYR**

**Confirmed sites:** @T:2,@S:4

**Ambiguous sites:**

**MS/MS Fragmentation of RTPSPDYDLYYYR**

Found in **TITIN\_MOUSE**, Titin OS=Mus musculus GN=Ttn PE=1 SV=1

Match to Query 5899: 1895.755347 from(632.925725,3+)

Title: Elution from: 49.641 to 49.641 scan no 4913 cid35.00 polarity:+:MA10

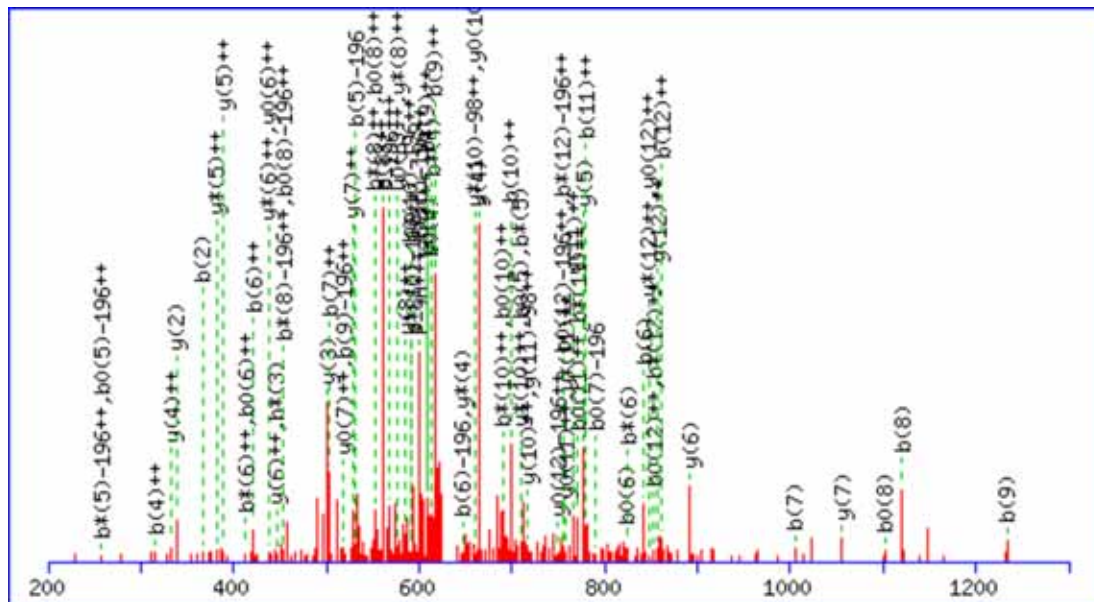

**Monoisotopic mass of neutral peptide Mr(calc):** 1895.7532

**Fixed modifications:** Carbamidomethyl (C) (apply to specified residues or termini only)

**Variable modifications:**

**N-term :** Dimethyl (N-term)

**T2 :** Phospho (ST), with neutral losses 0.0000(shown in table), 97.9769

**S4 :** Phospho (ST), with neutral losses 0.0000(shown in table), 97.9769

**Ions Score:** 44 **Expect:** 0.0011

**Matched b ions:** b(2), b(4)++, b(4)-98, b(5)-196, b(6)++, b(6), b(6)-98, b(6)-98++, b(6)-196, b(7)++, b(7), b(7)-98++, b(8)++, b(8)-98, b(8), b(8)-98++, b(9), b(9)++, b(9)-196++, b(9)-98++, b(10)++, b(10)-196++, b(10)-98++, b(11)++, b(11)-98++, b(12)++, b(12)-98++

**Matched y ions:** y(2), y(3), y(4), y(4)++, y(5), y(5)++, y(6), y(6)++, y(7), y(7)++, y(8)++, y(10)++, y(11)++, y(11)-98++, y(12)++, y(12)-98++

**Precursor origin neutral loss:** +

## Peptide No.815

**RTPSPDYDLYYYR**

**Confirmed sites:** @T:2,@Y:7

**Ambiguous sites:**

**MS/MS Fragmentation of RTPSPDYDLYYYR**

Found in **TITIN\_MOUSE**, Titin OS=Mus musculus GN=Ttn PE=1 SV=1

Match to Query 3853: 1895.756362 from(948.885457,2+)

Title: Elution from: 49.392 to 49.392 scan no 4518 cid35.00 polarity:+:MA10:m1s



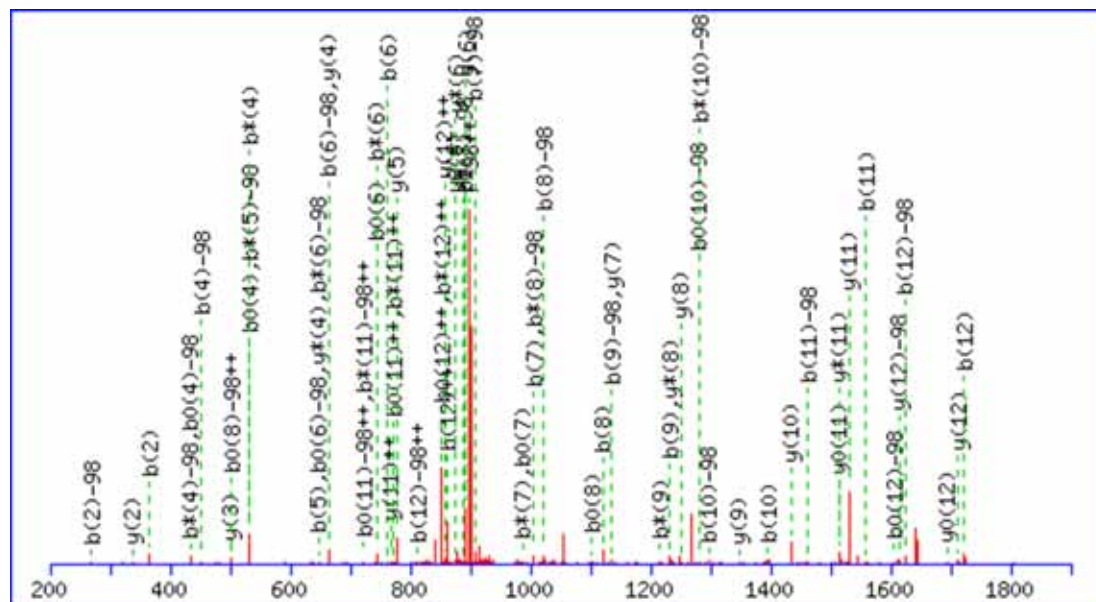

**Monoisotopic mass of neutral peptide Mr(calc):** 1895.7532

**Fixed modifications:** Carbamidomethyl (C) (apply to specified residues or termini only)

**Variable modifications:**

**N-term :** Dimethyl (N-term)

**T2 :** Phospho (ST), with neutral losses 0.0000(shown in table), 97.9769

**Y7 :** Phospho (Y)

**Ions Score:** 37 **Expect:** 0.0061

**Matched b ions:** b(2), b(2)-98, b(4)-98, b(5), b(6)-98, b(6), b(7), b(7)-98, b(8), b(8)-98, b(9), b(9)-98, b(10)-98, b(10), b(11)-98, b(11), b(12), b(12)-98, b(12)-98++, b(12)++

**Matched y ions:** y(2), y(3), y(4), y(5), y(6), y(7), y(8), y(9), y(10), y(11), y(11)++, y(12), y(12)-98, y(12)++

**Precursor origin neutral loss:** +

## Peptide No.816

**RTPSPDYDLYYYR**

**Confirmed sites:** @S:4

**Ambiguous sites:**

**MS/MS Fragmentation of RTPSPDYDLYYYR**

Found in **TITIN\_MOUSE**, Titin OS=Mus musculus GN=Ttn PE=1 SV=1

Match to Query 3156: 1821.820192 from(911.917372,2+)

Title: Elution from: 45.378 to 45.378 scan no 4046 cid35.00 polarity:+:MA10:m1s

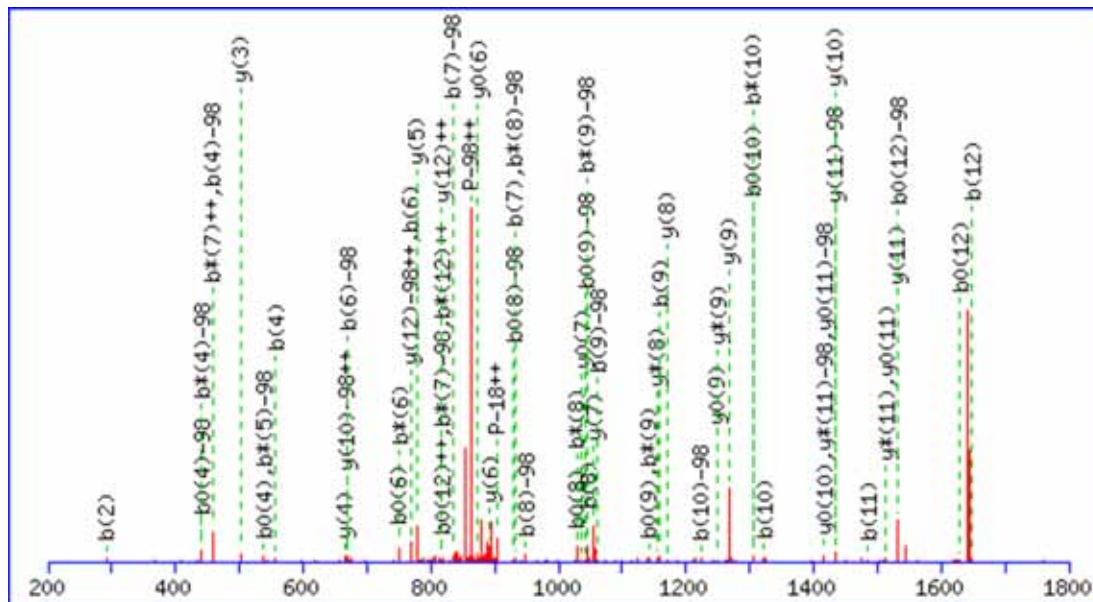

**Monoisotopic mass of neutral peptide Mr(calc):** 1821.8187

**Fixed modifications:** Carbamidomethyl (C) (apply to specified residues or termini only)

**Variable modifications:**

**N-term :** Dimethyl:2H(4)13C(2) (N-term)

**S4 :** Phospho (ST), with neutral losses 0.0000(shown in table), 97.9769

**Ions Score:** 48 **Expect:** 0.00073

**Matched b ions:** b(2), b(4)-98, b(4), b(6)-98, b(6), b(7), b(7)-98, b(8), b(8)-98, b(9), b(9)-98, b(10), b(10)-98, b(11), b(12)

**Matched y ions:** y(3), y(4), y(5), y(6), y(7), y(8), y(9), y(10), y(10)-98++, y(11), y(11)-98, y(12)-98++, y(12)++

**Precursor origin neutral loss:** +

## Peptide No.817

**RTPSPDYDLYYYR**

**Confirmed sites:** @Y:7

**Ambiguous sites:**

MS/MS Fragmentation of **RTPSPDYDLYYYR**

Found in **TITIN\_MOUSE**, Titin OS=Mus musculus GN=Ttn PE=1 SV=1

Match to Query 5142: 1821.819798 from(608.280542,3+)

Title: Elution from: 45.476 to 45.476 scan no 4367 cid35.00 polarity:+:MA10:m1s



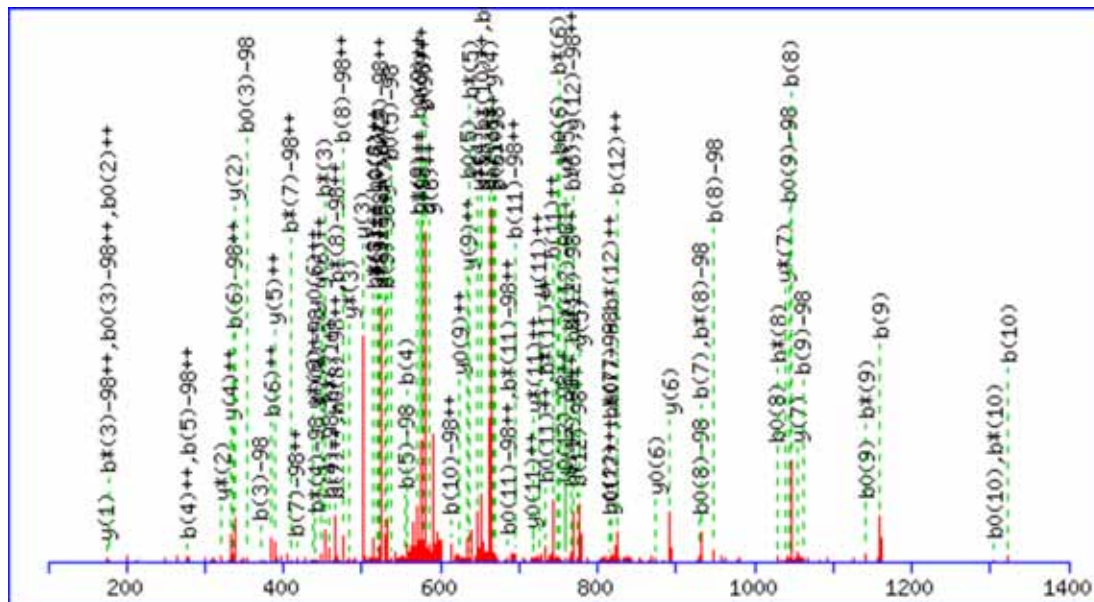

**Monoisotopic mass of neutral peptide Mr(calc):** 1821.8187

**Fixed modifications:** Carbamidomethyl (C) (apply to specified residues or termini only)

**Variable modifications:**

**N-term :** Dimethyl:2H(4)13C(2) (N-term)

**T2 :** Phospho (ST), with neutral losses 0.0000(shown in table), 97.9769

**Ions Score:** 44 **Expect:** 0.002

**Matched b ions:** b(3)-98, b(4)++, b(4)-98, b(4), b(5)-98++, b(5), b(5)-98, b(6), b(6)-98++, b(6)++, b(6)-98, b(7)++, b(7), b(7)-98++, b(8)++, b(8), b(8)-98++, b(8)-98, b(9), b(9)++, b(9)-98++, b(9)-98, b(10), b(10)++, b(10)-98++, b(11)++, b(11)-98++, b(12)++, b(12)-98++

**Matched y ions:** y(1), y(2), y(3), y(4), y(4)++, y(5), y(5)++, y(6), y(6)++, y(7), y(7)++, y(8)++, y(9)++, y(11)++, y(12)-98++, y(12)++

**Precursor origin neutral loss:** +

## Peptide No.819

**RTPSPDYDLYYYR**

**Confirmed sites:** @T:2,@S:4

**Ambiguous sites:**

**MS/MS Fragmentation of RTPSPDYDLYYYR**

Found in **TITIN\_MOUSE**, Titin OS=Mus musculus GN=Ttn PE=1 SV=1

Match to Query 4507: 1901.786868 from(634.936232,3+)

Title: Elution from: 49.422 to 49.422 scan no 4662 cid35.00 polarity:+MA10:m1s





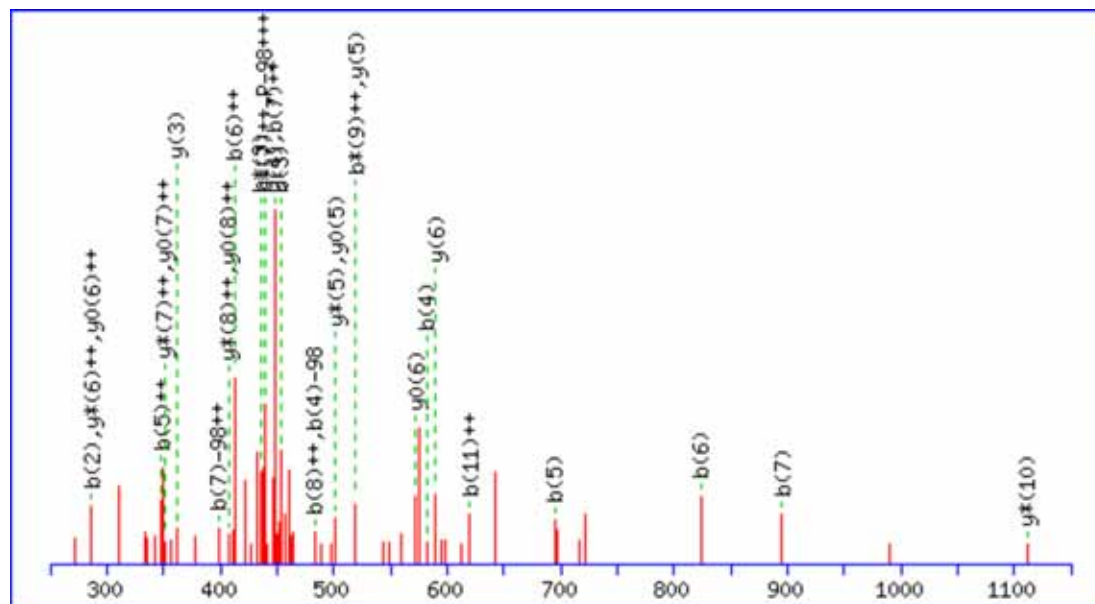

**Monoisotopic mass of neutral peptide Mr(calc):** 1412.6660

**Fixed modifications:** Carbamidomethyl (C) (apply to specified residues or termini only)

**Variable modifications:**

**N-term :** Dimethyl (N-term)

**S3 :** Phospho (ST), with neutral losses 0.0000(shown in table), 97.9769

**Ions Score:** 32 **Expect:** 0.019

**Matched b ions:** b(2), b(3), b(4)-98, b(4), b(5), b(5)++, b(6), b(6)++, b(7)++, b(7), b(7)-98++, b(8)++, b(11)++

**Matched y ions:** y(3), y(4), y(5), y(6)

**Precursor origin neutral loss:** +

## Peptide No.821

**RTSELEAASSVR**

**Confirmed sites:** @T:2

**Ambiguous sites:**

**MS/MS Fragmentation of RTSELEAASSVR**

Found in **TITIN\_MOUSE**, Titin OS=Mus musculus GN=Ttn PE=1 SV=1

Match to Query 2073: 1412.666082 from(707.340317,2+)

Title: Elution from: 28.064 to 28.064 scan no 2038 cid35.00 polarity:+:MA10

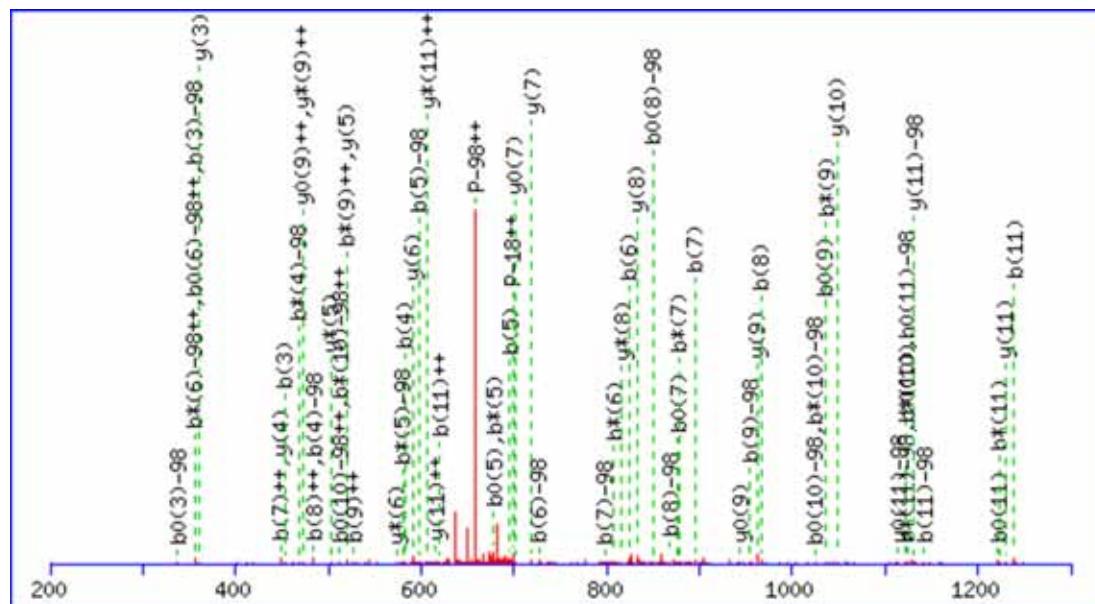

**Monoisotopic mass of neutral peptide Mr(calc):** 1412.6660

**Fixed modifications:** Carbamidomethyl (C) (apply to specified residues or termini only)

**Variable modifications:**

**N-term :** Dimethyl (N-term)

**T2 :** Phospho (ST), with neutral losses 97.9769(shown in table), 0.0000

**Ions Score:** 42 **Expect:** 0.0022

**Matched b ions:** b(3)-98, b(3), b(4)-98, b(4), b(5)-98, b(5), b(6)-98, b(6), b(7)++, b(7), b(7)-98, b(8)++, b(8), b(8)-98, b(9)++, b(9)-98, b(11), b(11)-98, b(11)++

**Matched y ions:** y(3), y(4), y(5), y(6), y(7), y(8), y(9), y(10), y(11), y(11)-98, y(11)++

**Precursor origin neutral loss:** +

## Peptide No.822

**RTSMGGTQQQFVEGVR**

**Confirmed sites:** @S:3

**Ambiguous sites:**

MS/MS Fragmentation of **RTSMGGTQQQFVEGVR**

Found in **CTNB1\_MOUSE**, Catenin beta-1 OS=Mus musculus GN=Ctnnb1 PE=1 SV=1

Match to Query 5093: 1903.862547 from(635.628125,3+)

Title: Elution from: 31.768 to 31.768 scan no 2548 cid35.00 polarity:+:MA10







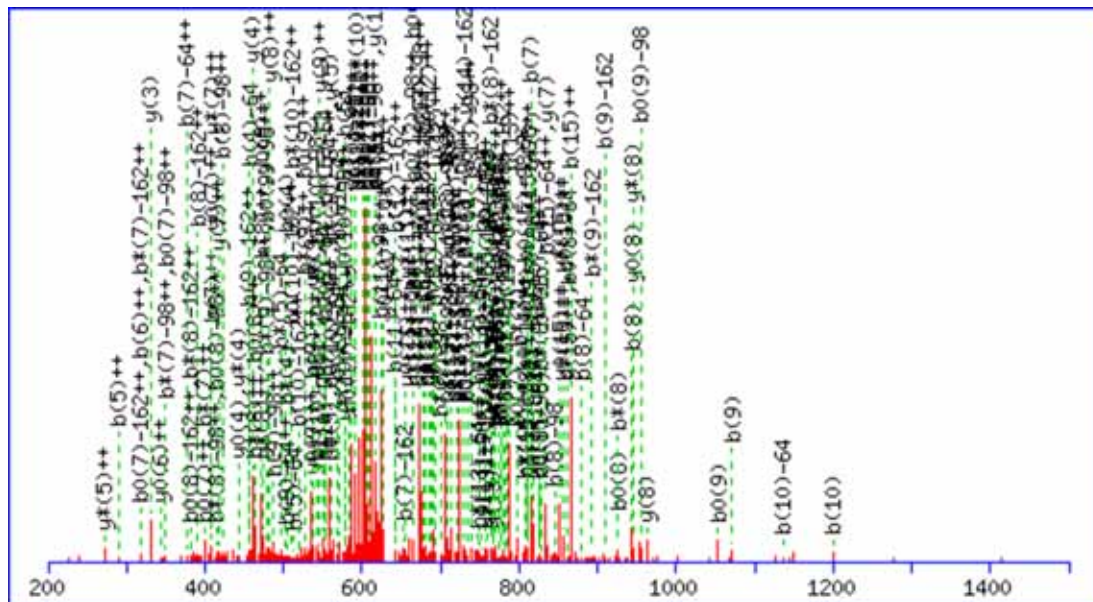

**Monoisotopic mass of neutral peptide Mr(calc):** 1903.8612

**Fixed modifications:** Carbamidomethyl (C) (apply to specified residues or termini only)

**Variable modifications:**

**N-term :** Dimethyl (N-term)

**M4 :** Oxidation (M), with neutral losses 0.0000(shown in table), 63.9983

**T7 :** Phospho (ST), with neutral losses 0.0000(shown in table), 97.9769

**Ions Score:** 59 **Expect:** 6.9e-005

**Matched b ions:** b(5)++, b(5), b(6)++, b(7)++, b(7), b(8), b(8)++, b(8)-98++, b(8)-98, b(9), b(9)-98++, b(9)++, b(10), b(10)++, b(10)-98++, b(11)++, b(11)-98++, b(12)-98++, b(12)++, b(13)++, b(13)-98++, b(14)++, b(14)-98++, b(15)++, b(15)-98++

**Matched y ions:** y(3), y(4), y(5), y(6), y(7), y(7)++, y(8), y(8)++, y(9)++, y(10)-98++, y(11)-98++, y(11)++, y(12)++, y(13)++, y(14)++, y(15)-98++, y(15)++

**Precursor origin neutral loss:** +

## Peptide No.825

**RVKSPEPVTSHPK**

**Confirmed sites:** @S:4

**Ambiguous sites:**

**MS/MS Fragmentation of RVKSPEPVTSHPK**

Found in **TITIN\_MOUSE**, Titin OS=Mus musculus GN=Ttn PE=1 SV=1

Match to Query 3267: 1624.871049 from(542.630959,3+)

Title: Elution from: 18.976 to 18.976 scan no 876 cid35.00 polarity:+:MA10

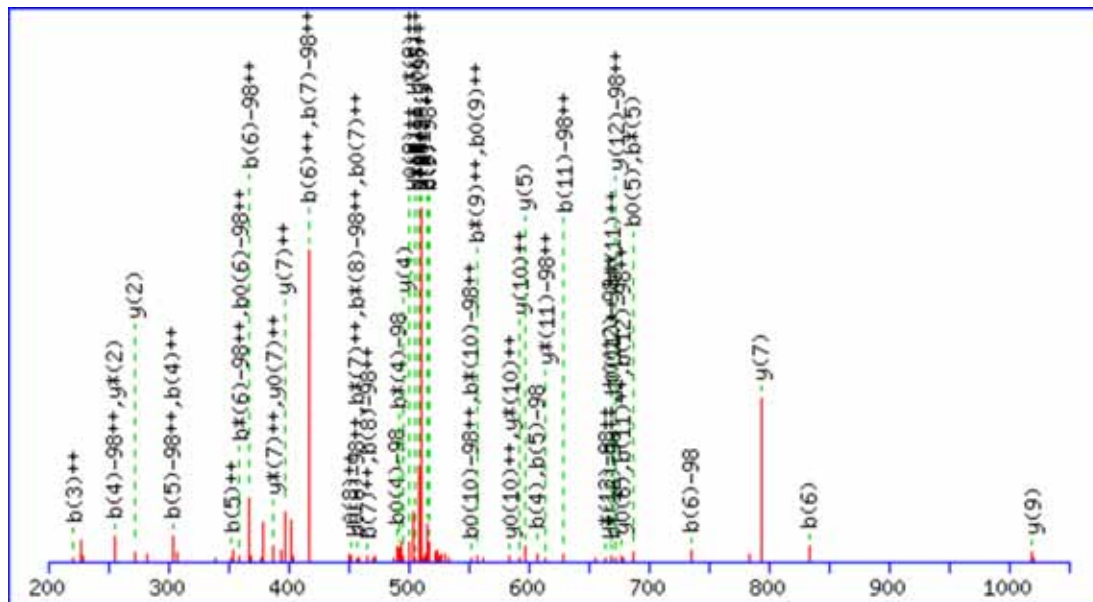

**Monoisotopic mass of neutral peptide Mr(calc): 1624.8702**

**Fixed modifications:** Carbamidomethyl (C) (apply to specified residues or termini only)

**Variable modifications:**

**N-term :** Dimethyl (N-term)

**K3 :** Dimethyl (K)

**S4 :** Phospho (ST), with neutral losses 97.9769(shown in table), 0.0000

**K13 :** Dimethyl (K)

**Ions Score: 40 Expect: 0.0049**

**Matched b ions:** b(3)++, b(4)++, b(4)-98++, b(4)-98, b(4), b(5)-98++, b(5)-98, b(5)++, b(6)++, b(6), b(6)-98++, b(6)-98, b(7)-98++, b(7)++, b(8)++, b(8)-98++, b(9)-98++, b(11)-98++, b(11)++, b(12)-98++

**Matched y ions:** y(2), y(4), y(5), y(7), y(7)++, y(9)++, y(9), y(10)++, y(12)-98++

**Precursor origin neutral loss:** +

## Peptide No.826

**RVKSPEPVTSHPK**

**Confirmed sites: @S:4**

**Ambiguous sites:**

**MS/MS Fragmentation of RVKSPEPVTSHPK**

Found in **TITIN\_MOUSE**, Titin OS=Mus musculus GN=Ttn PE=1 SV=1

Match to Query 2648: 1642.965052 from(411.748539,4+)

Title: Elution from: 18.869 to 18.869 scan no 856 cid35.00 polarity:+:MA10

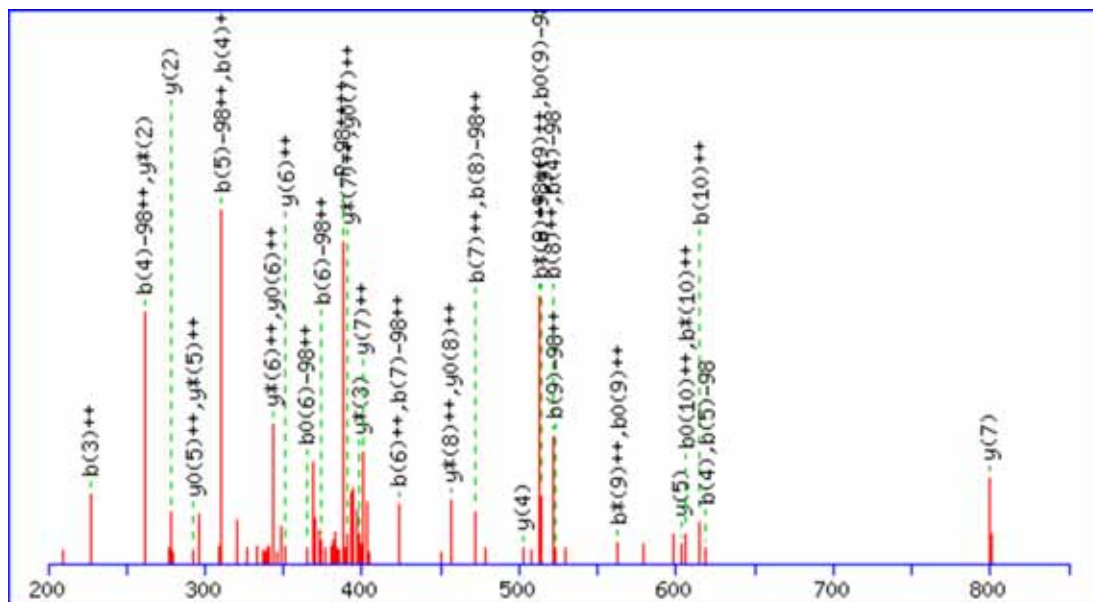

**Monoisotopic mass of neutral peptide Mr(calc):** 1642.9656

**Fixed modifications:** Carbamidomethyl (C) (apply to specified residues or termini only)

**Variable modifications:**

**N-term :** Dimethyl:2H(4)13C(2) (N-term)

**K3 :** Dimethyl:2H(4)13C(2) (K)

**S4 :** Phospho (ST), with neutral losses 0.0000(shown in table), 97.9769

**K13 :** Dimethyl:2H(4)13C(2) (K)

**Ions Score:** 40 **Expect:** 0.0025

**Matched b ions:** b(3)++, b(4)-98++, b(4)++, b(4)-98, b(4), b(5)-98++, b(5)-98, b(6)++, b(6)-98++, b(7)-98++, b(7)++, b(8)++, b(8)-98++, b(9)-98++, b(10)++

**Matched y ions:** y(2), y(4), y(5), y(6)++, y(7), y(7)++, y(9)++

**Precursor origin neutral loss:** +

## Peptide No.827

**RVSVCAETFNPDEEEEDNDPR**

**Confirmed sites:** @S:3

**Ambiguous sites:**

MS/MS Fragmentation of **RVSVCAETFNPDEEEEDNDPR**

Found in **KAP2\_MOUSE**, cAMP-dependent protein kinase type II-alpha regulatory subunit OS=Mus musculus GN=Prkar2a PE=1 SV=2

Match to Query 7041: 2615.048994 from(1308.531773,2+)

Title: Elution from: 41.946 to 41.946 scan no 3766 cid35.00 polarity:+:MA10:m1s



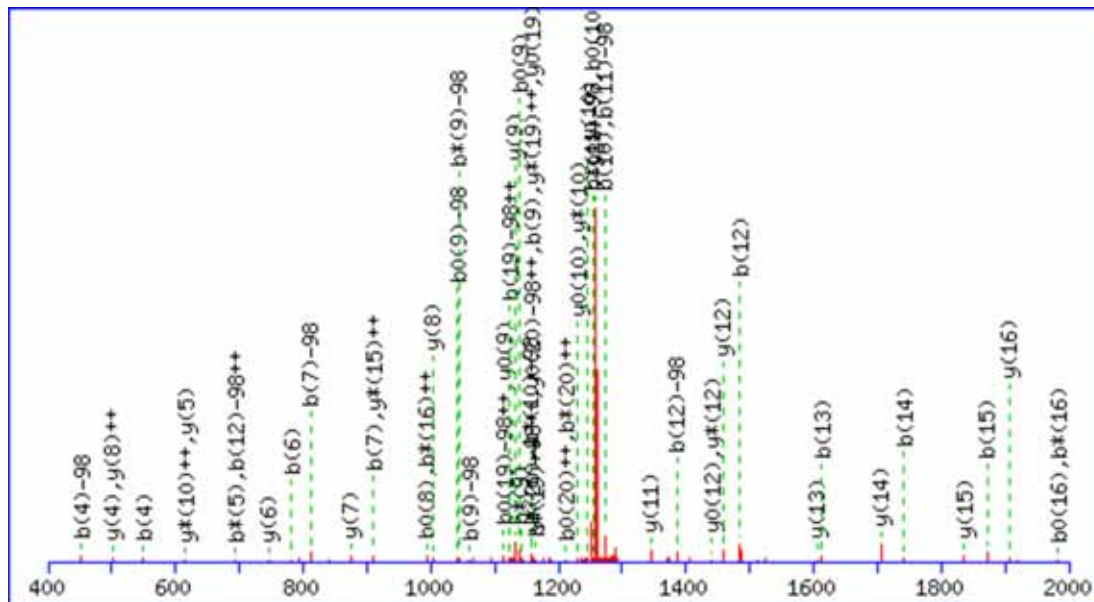

**Monoisotopic mass of neutral peptide Mr(calc):** 2615.0483

**Fixed modifications:** Carbamidomethyl (C) (apply to specified residues or termini only)

**Variable modifications:**

**N-term :** Dimethyl (N-term)

**S3 :** Phospho (ST), with neutral losses 97.9769(shown in table), 0.0000

**Ions Score:** 74 **Expect:** 1.6e-006

**Matched b ions:** b(4)-98, b(4), b(6), b(7)-98, b(7), b(9), b(9)-98, b(10), b(11)-98, b(12)-98, b(12), b(12)-98++, b(13), b(14), b(15), b(19)-98++

**Matched y ions:** y(4), y(5), y(6), y(7), y(8)++, y(8), y(9), y(10), y(11), y(12), y(13), y(14), y(15), y(16)

**Precursor origin neutral loss:** +

## Peptide No.828

**RVSVCAETFNPDEEEEDNDPR**

**Confirmed sites:** @T:8

**Ambiguous sites:**

MS/MS Fragmentation of **RVSVCAETFNPDEEEEDNDPR**

Found in **KAP2\_MOUSE**, cAMP-dependent protein kinase type II-alpha regulatory subunit OS=Mus musculus GN=Prkar2a PE=1 SV=2

Match to Query 6868: 2615.049630 from(872.690486,3+)

Title: Elution from: 41.693 to 41.693 scan no 3704 cid35.00 polarity:+:MA10:m1s

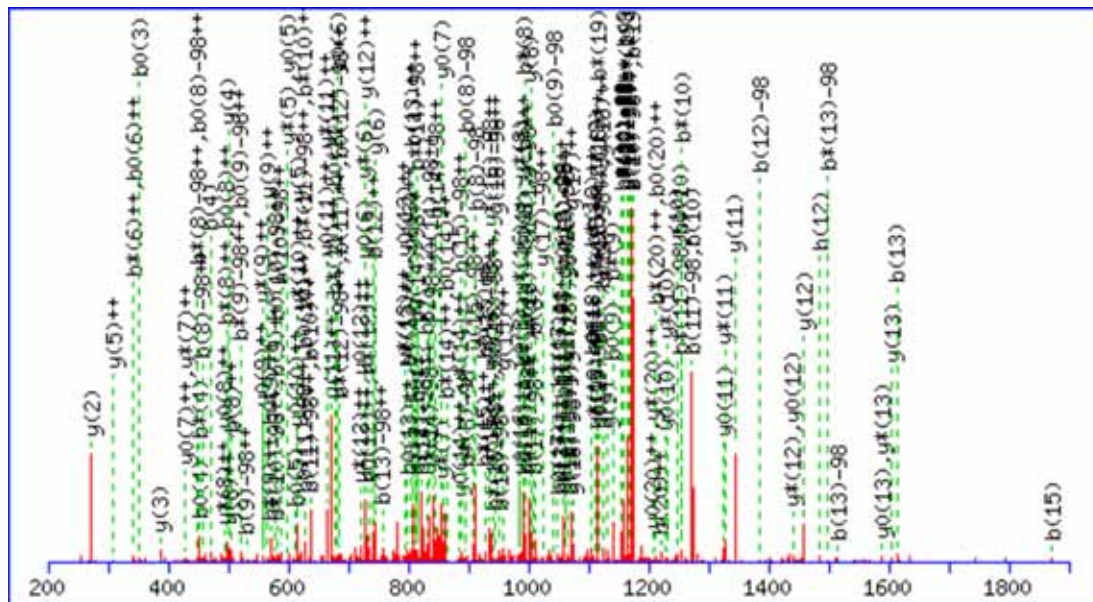

**Monoisotopic mass of neutral peptide Mr(calc):** 2615.0483

**Fixed modifications:** Carbamidomethyl (C) (apply to specified residues or termini only)

**Variable modifications:**

**N-term :** Dimethyl (N-term)

**T8 :** Phospho (ST), with neutral losses 0.0000(shown in table), 97.9769

**Ions Score:** 45 **Expect:** 0.0015

**Matched b ions:** b(4), b(7), b(8)++, b(8), b(8)-98++, b(8)-98, b(9), b(9)++, b(9)-98++, b(9)-98, b(10)++, b(10), b(10)-98++, b(10)-98, b(11)-98++, b(11)-98, b(11)++, b(12), b(12)++, b(12)-98, b(13), b(13)++, b(13)-98, b(13)-98++, b(14)-98++, b(15), b(15)++, b(15)-98++, b(16)++, b(16)-98++, b(17)++, b(17)-98++, b(18)++, b(18)-98++, b(19)++, b(19)-98++, b(20)-98++, b(20)++

**Matched y ions:** y(2), y(3), y(4), y(5), y(5)++, y(6), y(8), y(8)++, y(9)++, y(9), y(10), y(11)++, y(11), y(12), y(12)++, y(13), y(13)++, y(14)-98++, y(15)++, y(15)-98++, y(16)++, y(16)-98++, y(17)++, y(17)-98++, y(18)-98++, y(18)++, y(19)-98++, y(19)++, y(20)-98++

**Precursor origin neutral loss:**

## Peptide No.829

**RVSVCAETFNPDEEEEDNDPR**

**Confirmed sites: @S:3**

**Ambiguous sites:**

MS/MS Fragmentation of **RVSVCAETFNPDEEEEDNDPR**

Found in **KAP2\_MOUSE**, cAMP-dependent protein kinase type II-alpha regulatory subunit OS=Mus musculus GN=Prkar2a PE=1 SV=2

Match to Query 8395: 2621.081026 from(1311.547789,2+)

Title: Elution from: 41.858 to 41.858 scan no 3898 cid35.00 polarity:+:MA10:m1s

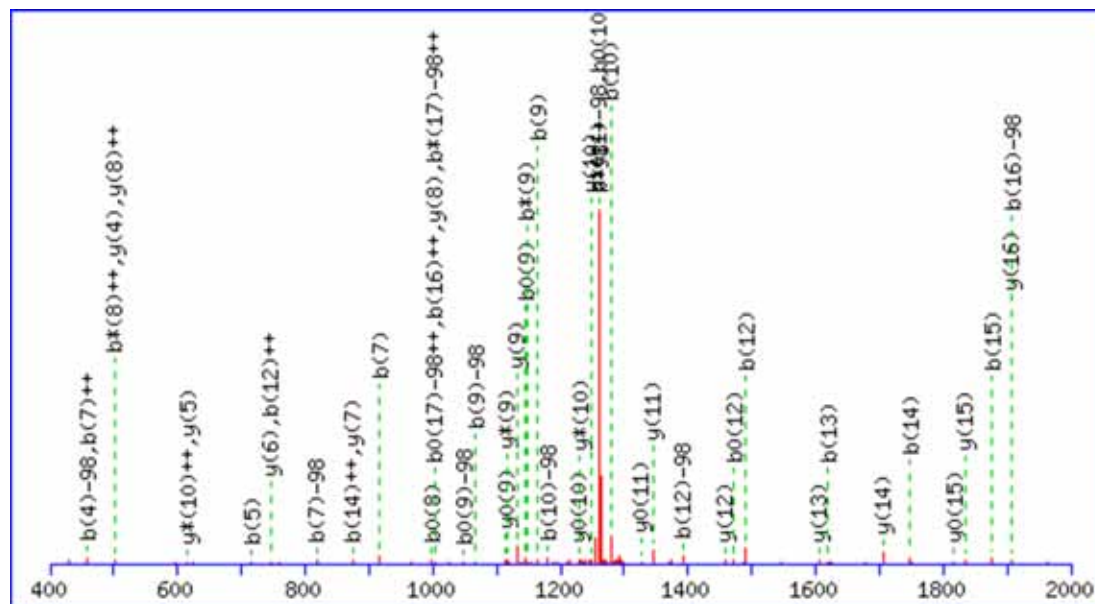

**Monoisotopic mass of neutral peptide Mr(calc):** 2621.0801

**Fixed modifications:** Carbamidomethyl (C) (apply to specified residues or termini only)

**Variable modifications:**

**N-term :** Dimethyl:2H(4)13C(2) (N-term)

**S3 :** Phospho (ST), with neutral losses 97.9769(shown in table), 0.0000

**Ions Score:** 70 **Expect:** 5.6e-006

**Matched b ions:** b(4)-98, b(5), b(7)++, b(7)-98, b(7), b(9)-98, b(9), b(10), b(10)-98, b(12), b(12)++, b(12)-98, b(13), b(14), b(14)++, b(15), b(16)++, b(16)-98

**Matched y ions:** y(4), y(5), y(6), y(7), y(8)++, y(8), y(9), y(10), y(11), y(12), y(13), y(14), y(15), y(16)

**Precursor origin neutral loss:** +

## Peptide No.830

**RWSGELR**

**Confirmed sites:** @S:3

**Ambiguous sites:**

**MS/MS Fragmentation of RWSGELR**

Found in **PLIN5\_MOUSE**, Perilipin-5 OS=Mus musculus GN=Plin5 PE=1 SV=1

Match to Query 474: 1010.470068 from(337.830632,3+)

Title: Elution from: 29.810 to 29.810 scan no 2118 cid35.00 polarity:+:MA10

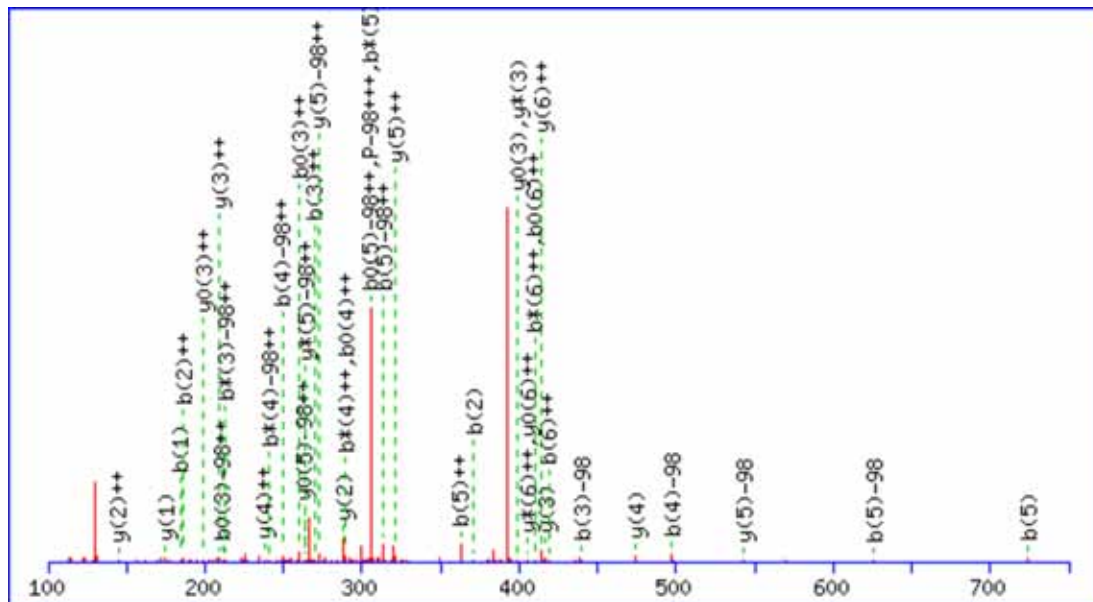

**Monoisotopic mass of neutral peptide Mr(calc):** 1010.4698

**Fixed modifications:** Carbamidomethyl (C) (apply to specified residues or termini only)

**Variable modifications:**

**N-term :** Dimethyl (N-term)

**S3 :** Phospho (ST), with neutral losses 97.9769(shown in table), 0.0000

**Ions Score:** 27 **Expect:** 0.042

**Matched b ions:** b(1), b(2)++, b(2), b(3)-98, b(3)++, b(4)-98, b(4)-98++, b(5)-98, b(5), b(5)-98++, b(5)++, b(6)++

**Matched y ions:** y(1), y(2), y(2)++, y(3), y(3)++, y(4), y(4)++, y(5)-98, y(5)-98++, y(5)++, y(6)++

**Precursor origin neutral loss:** +

## Peptide No.831

**RWSGELR**

**Confirmed sites:** @S:3

**Ambiguous sites:**

**MS/MS Fragmentation of RWSGELR**

Found in **PLIN5\_MOUSE**, Perilipin-5 OS=Mus musculus GN=Plin5 PE=1 SV=1

Match to Query 428: 1016.502492 from(339.841440,3+)

Title: Elution from: 29.751 to 29.751 scan no 2072 cid35.00 polarity:+:MA10





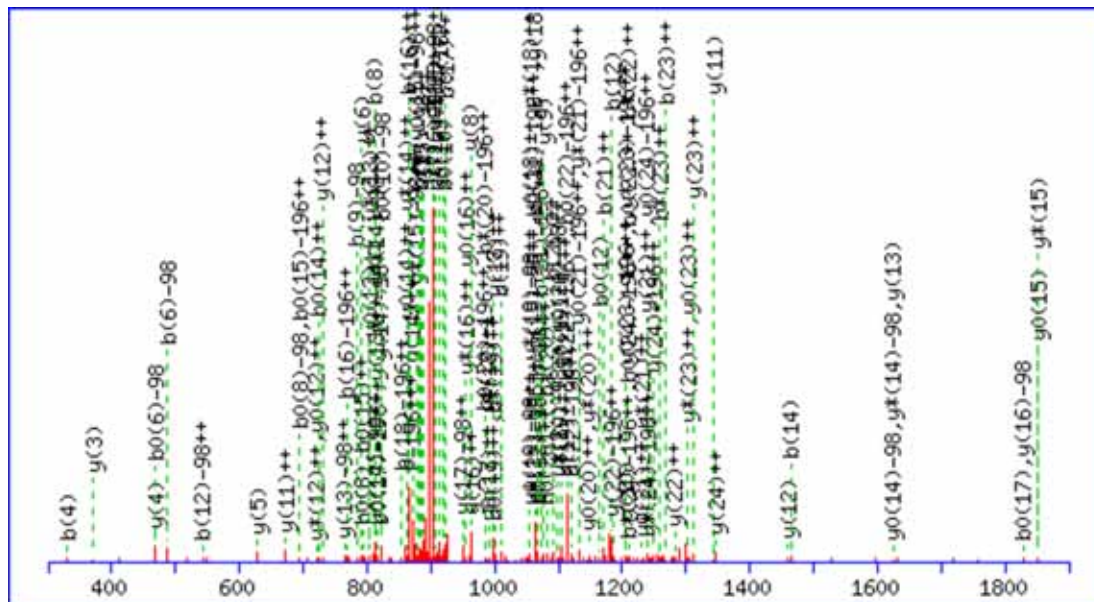

**Monoisotopic mass of neutral peptide Mr(calc):** 2807.0307

**Fixed modifications:** Carbamidomethyl (C) (apply to specified residues or termini only)

**Variable modifications:**

**N-term :** Dimethyl (N-term)

**S5 :** Phospho (ST), with neutral losses 0.0000(shown in table), 97.9769

**S13 :** Phospho (ST), with neutral losses 0.0000(shown in table), 97.9769

**K25 :** Dimethyl (K)

**Ions Score:** 56 **Expect:** 5.4e-005

**Matched b ions:** b(4), b(6)-98, b(8), b(9)-98, b(9), b(11), b(12)-98++, b(12), b(14), b(16)++, b(16)-196++, b(16)-98++, b(17)++, b(17)-98++, b(18)-196++, b(19)-98++, b(19)++, b(20)++, b(20)-98++, b(21)++, b(21)-98++, b(21)-196++, b(22)-98++, b(22)-196++, b(23)++, b(24)-98++

**Matched y ions:** y(3), y(4), y(5), y(6), y(7), y(8), y(9), y(10), y(11)++, y(11), y(12)++, y(12), y(13)++, y(13), y(13)-98++, y(14)-98++, y(14)++, y(15)-98++, y(16)++, y(16)-98, y(16)-98++, y(17)++, y(17)-98++, y(18)++, y(19)++, y(19)-98++, y(21)++, y(21)-98++, y(22)-196++, y(22)-98++, y(22)++, y(23)++, y(23)-98++, y(24)-98++, y(24)++, y(24)-196++

**Precursor origin neutral loss:** +

## Peptide No.833

**SAPASPTHPLMSPR**

**Confirmed sites:** @S:5,@S:13

**Ambiguous sites:**

**MS/MS Fragmentation of SAPASPTHPLMSPR**

Found in **FOXK1\_MOUSE**, Forkhead box protein K1 OS=Mus musculus GN=Foxk1 PE=1 SV=2

Match to Query 3780: 1708.706844 from(570.576224,3+)

Title: Elution from: 28.983 to 28.983 scan no 2164 cid35.00 polarity:+:MA10:m1s

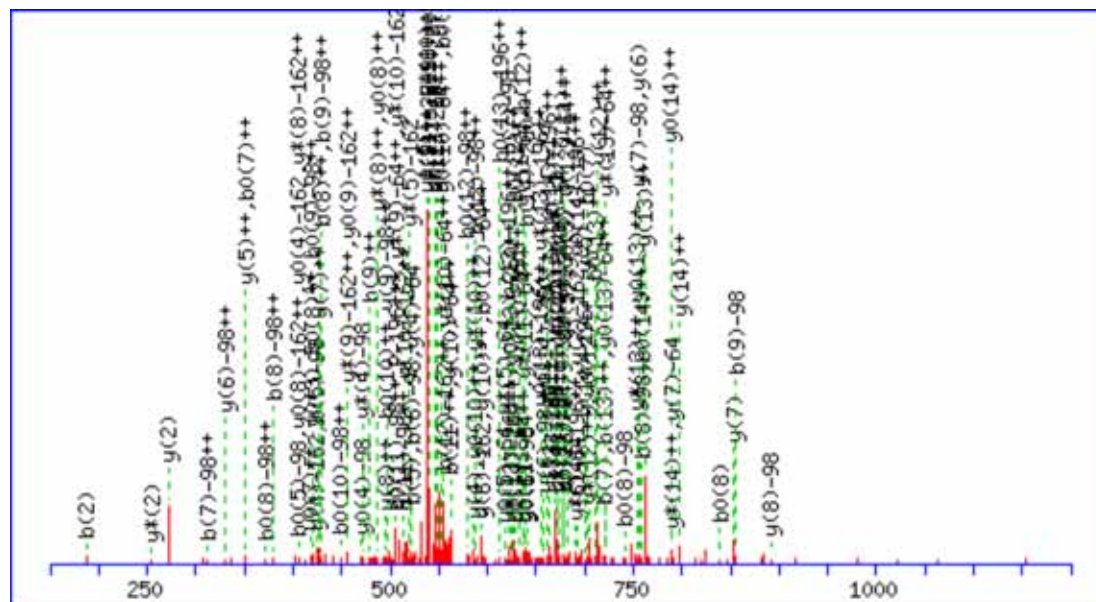

**Monoisotopic mass of neutral peptide Mr(calc): 1708.7045**

**Fixed modifications:** Carbamidomethyl (C) (apply to specified residues or termini only)

**Variable modifications:**

**N-term :** Dimethyl (N-term)

**S5 :** Phospho (ST), with neutral losses 0.0000(shown in table), 97.9769

**M12 :** Oxidation (M), with neutral losses 0.0000(shown in table), 63.9983

**S13 :** Phospho (ST), with neutral losses 0.0000(shown in table), 97.9769

**Ions Score: 28 Expect: 0.041**

**Matched b ions:** b(2), b(5)-98, b(5), b(6)-98, b(7)-98++, b(7)-98, b(7), b(8)-98++, b(8)++, b(8)-98, b(9)-98, b(9)-98++, b(9)++, b(10)++, b(11)++, b(11)-98++, b(12)-98++, b(12)++, b(13)-98++, b(13)-196++, b(13)++, b(14)-196++, b(14)-98++

**Matched y ions:** y(2), y(4), y(5)++, y(5), y(6)-98++, y(6), y(6)-98, y(7), y(7)++, y(7)-98, y(8)-98, y(8)++, y(9)++, y(9)-98++, y(10)++, y(10)-98++, y(11)-98++, y(11)++, y(12)++, y(12)-98++, y(13)++, y(13)-98++, y(13)-196++, y(14)++, y(14)-98++, y(14)-196++

**Precursor origin neutral loss:** +

## Peptide No.834

**SASPDDLGLSSNWEAADLGNEER**

**Confirmed sites: @S:3**

**Ambiguous sites:**

MS/MS Fragmentation of **SASPDDLGLSSNWEAADLGNEER**

Found in **SMAP\_MOUSE**, Small acidic protein OS=Mus musculus GN=Smap PE=1 SV=1

Match to Query 7703: 2542.014850 from(1272.014701,2+)

Title: Elution from: 52.490 to 52.490 scan no 5199 cid35.00 polarity:+:MA10:m1s

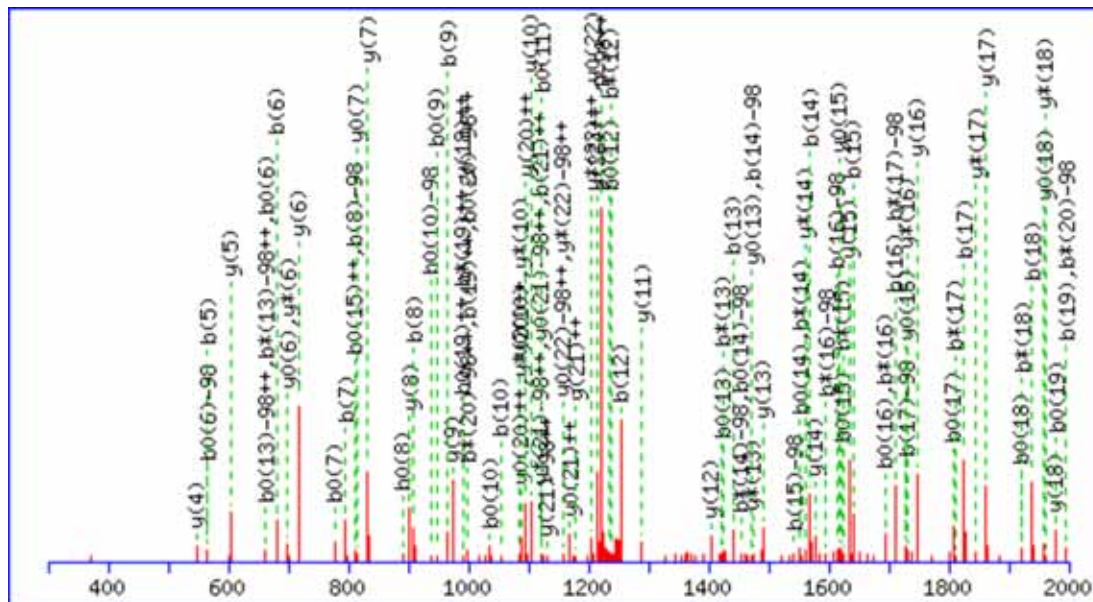

**Monoisotopic mass of neutral peptide Mr(calc):** 2542.0133

**Fixed modifications:** Carbamidomethyl (C) (apply to specified residues or termini only)

**Variable modifications:**

**N-term :** Dimethyl (N-term)

**S3 :** Phospho (ST), with neutral losses 0.0000(shown in table), 97.9769

**Ions Score:** 124 **Expect:** 1.9e-011

**Matched b ions:** b(5), b(6), b(7), b(8), b(8)-98, b(9), b(10), b(12), b(13), b(14), b(14)-98, b(15), b(15)-98, b(16), b(16)-98, b(17), b(17)-98, b(18), b(19), b(19)++, b(21)++

**Matched y ions:** y(4), y(5), y(6), y(7), y(8), y(9), y(10), y(11), y(12), y(13), y(14), y(15), y(16), y(17), y(18), y(18)++, y(20)++, y(21)-98++, y(21)++, y(22)++

**Precursor origin neutral loss:** +

## Peptide No.835

**SASQSSLDKLDQELK**

**Confirmed sites:** @S:3,@S:5

**Ambiguous sites:**

MS/MS Fragmentation of **SASQSSLDKLDQELK**

Found in **JIP4\_MOUSE**, C-Jun-amino-terminal kinase-interacting protein 4 OS=Mus musculus  
GN=Spag9 PE=1 SV=2

Match to Query 4343: 1891.858506 from(946.936529,2+)

Title: Elution from: 47.620 to 47.620 scan no 4408 cid35.00 polarity:+:MA10







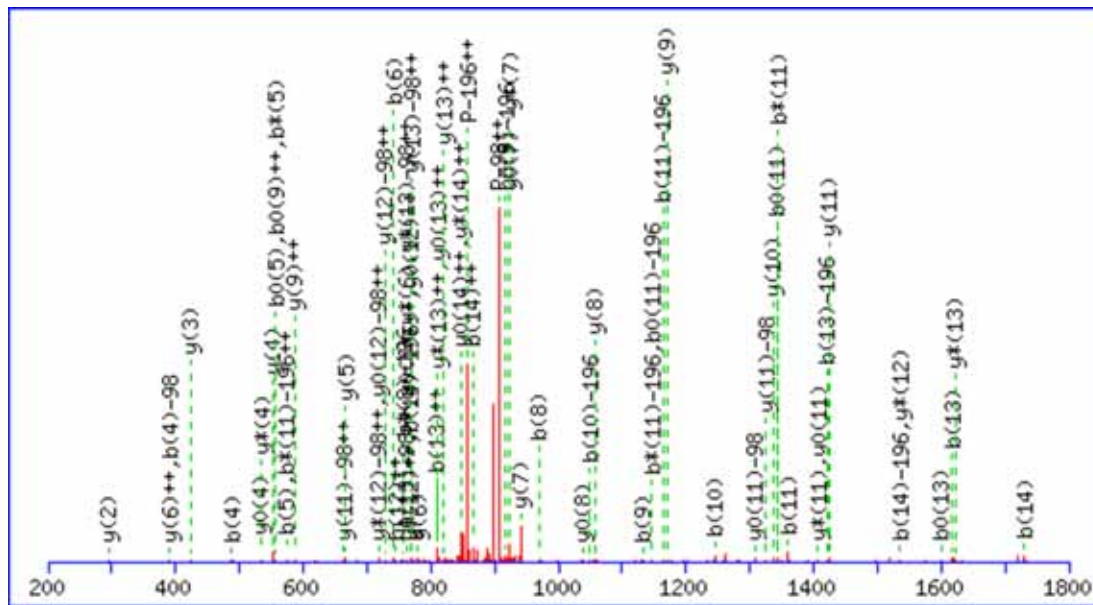

**Monoisotopic mass of neutral peptide Mr(calc):** 1909.9535

**Fixed modifications:** Carbamidomethyl (C) (apply to specified residues or termini only)

**Variable modifications:**

**N-term :** Dimethyl:2H(4)13C(2) (N-term)

**S1 :** Phospho (ST), with neutral losses 0.0000(shown in table), 97.9769

**S6 :** Phospho (ST), with neutral losses 0.0000(shown in table), 97.9769

**K9 :** Dimethyl:2H(4)13C(2) (K)

**K15 :** Dimethyl:2H(4)13C(2) (K)

**Ions Score:** 35 **Expect:** 0.024

**Matched b ions:** b(4), b(4)-98, b(5), b(6), b(7)-98, b(8)-98, b(8), b(9), b(9)-98, b(10)-196, b(10), b(10)-98, b(10)-98++, b(11)-98, b(11), b(11)-196, b(12)-98, b(12)++, b(13), b(13)-98, b(13)-196, b(13)++, b(14)-196++, b(14), b(14)-98, b(14)-196, b(14)++

**Matched y ions:** y(2), y(3), y(4), y(5), y(6)++, y(6), y(7), y(8), y(9), y(9)++, y(10), y(11), y(11)-98++, y(11)-98, y(12)-98++, y(13)-98++, y(13)++

**Precursor origin neutral loss:** +

## Peptide No.838

**SASQSSLDKLDQELK**

**Confirmed sites:** @S:3,@S:6

**Ambiguous sites:**

MS/MS Fragmentation of **SASQSSLDKLDQELK**

Found in **JIP4\_MOUSE**, C- Jun-amino-terminal kinase-interacting protein 4 OS=Mus musculus  
GN=Spag9 PE=1 SV=2

Match to Query 4299: 1909.954108 from(955.984330,2+)

Title: Elution from: 47.550 to 47.550 scan no 4386 cid35.00 polarity:+:MA10

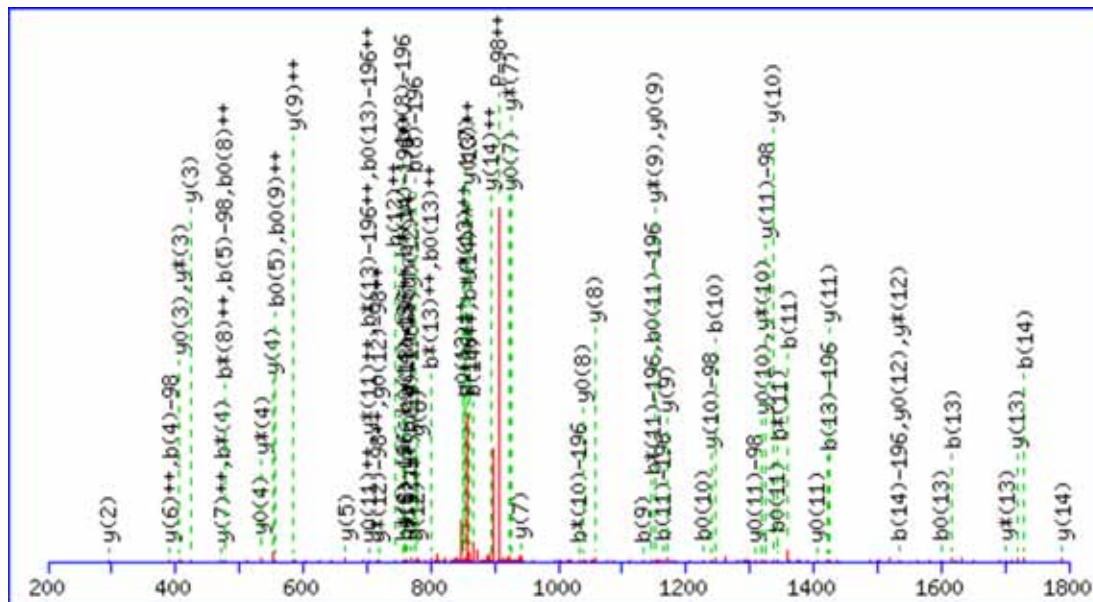

**Monoisotopic mass of neutral peptide Mr(calc):** 1909.9535

**Fixed modifications:** Carbamidomethyl (C) (apply to specified residues or termini only)

**Variable modifications:**

**N-term :** Dimethyl:2H(4)13C(2) (N-term)

**S3 :** Phospho (ST), with neutral losses 0.0000(shown in table), 97.9769

**S6 :** Phospho (ST), with neutral losses 0.0000(shown in table), 97.9769

**K9 :** Dimethyl:2H(4)13C(2) (K)

**K15 :** Dimethyl:2H(4)13C(2) (K)

**Ions Score:** 56 **Expect:** 0.00018

**Matched b ions:** b(4)-98, b(5)-98, b(6)-98, b(7)-98, b(7), b(8)-98, b(8)-196, b(9), b(9)-98, b(10), b(10)-98, b(11)-98, b(11), b(11)-196, b(12)++, b(12)-98, b(13)-98, b(13), b(13)-196, b(14)-196++, b(14)-98, b(14), b(14)-196, b(14)++

**Matched y ions:** y(2), y(3), y(4), y(5), y(6)++, y(6), y(7)++, y(7), y(8), y(9), y(9)++, y(10)-98, y(10), y(11), y(11)-98, y(12)++, y(13), y(13)-98, y(13)-196++, y(13)++, y(13)-98++, y(14), y(14)-98, y(14)-98++, y(14)++

**Precursor origin neutral loss:** +

## Peptide No.839

**SAYQDYDSDSDVPEELKR**

**Confirmed sites:** @Y:6,@S:10

**Ambiguous sites:**

MS/MS Fragmentation of **SAYQDYDSDSDVPEELKR**

Found in **CC132\_MOUSE**, Coiled-coil domain-containing protein 132 OS=Mus musculus GN=Ccdc132 PE=1 SV=2

Match to Query 7134: 2331.919971 from(778.313933,3+)

Title: Elution from: 45.272 to 45.272 scan no 4335 cid35.00 polarity:+:MA10:m1s







SV=1

Match to Query 698: 1126.524608 from(564.269580,2+)

Title: Elution from: 64.023 to 64.023 scan no 6022 cid35.00 polarity+:MA10:m1s

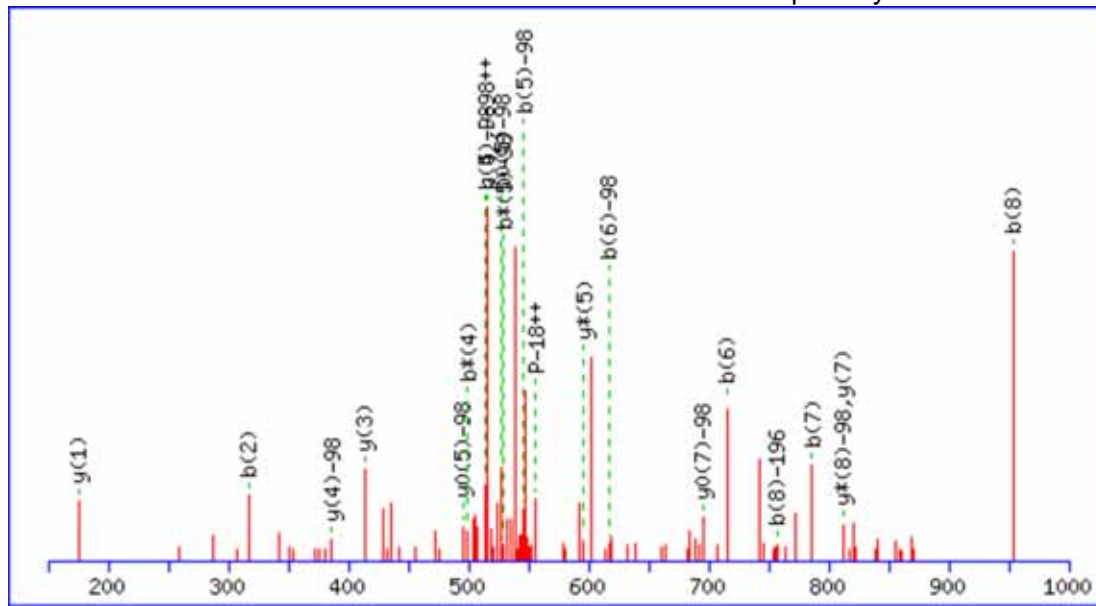

**Monoisotopic mass of neutral peptide Mr(calc): 1126.5248**

**Fixed modifications:** Carbamidomethyl (C) (apply to specified residues or termini only)

**Variable modifications:**

**N-term :** Dimethyl:2H(4)13C(2) (N-term)

**S1 :** Phospho (ST), with neutral losses 0.0000(shown in table), 97.9769

**S8 :** Phospho (ST), with neutral losses 0.0000(shown in table), 97.9769

**K9 :** Dimethyl (K)

**Ions Score:** 42 **Expect:** 0.0017

**Matched b ions:** b(2), b(4), b(5)-98, b(6), b(6)-98, b(7), b(8), b(8)-196

**Matched y ions:** y(1), y(3), y(4)-98, y(5)-98, y(7)

**Precursor origin neutral loss:** +

## Peptide No.842

**SDEEDEDSDFGEEQR**

**Confirmed sites:** @S:8

**Ambiguous sites:**

MS/MS Fragmentation of **SDEEDEDSDFGEEQR**

Found in **GPAT1\_MOUSE**, Glycerol-3-phosphate acyltransferase 1, mitochondrial OS=Mus musculus  
GN=Gpam PE=1 SV=1

Match to Query 4062: 1899.674820 from(950.844686,2+)

Title: Elution from: 30.947 to 30.947 scan no 2244 cid35.00 polarity+:MA10:m1s

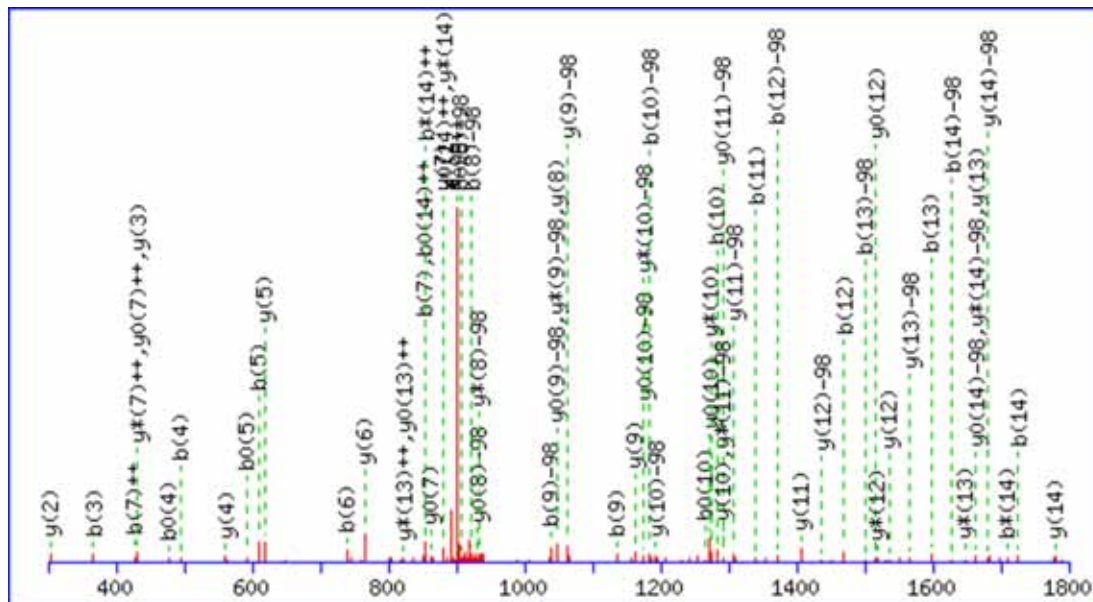

**Monoisotopic mass of neutral peptide Mr(calc):** 1899.6743

**Fixed modifications:** Carbamidomethyl (C) (apply to specified residues or termini only)

**Variable modifications:**

**N-term :** Dimethyl:2H(4)13C(2) (N-term)

**S8 :** Phospho (ST), with neutral losses 0.0000(shown in table), 97.9769

**Ions Score:** 77 **Expect:** 2.1e-007

**Matched b ions:** b(3), b(4), b(5), b(6), b(7)++, b(7), b(8)-98, b(9)-98, b(9), b(10)-98, b(10), b(11), b(12)-98, b(12), b(13), b(13)-98, b(14), b(14)-98

**Matched y ions:** y(2), y(3), y(4), y(5), y(6), y(7), y(8), y(9), y(9)-98, y(10)-98, y(10), y(11)-98, y(11), y(12)-98, y(12), y(13), y(13)-98, y(14), y(14)-98

**Precursor origin neutral loss:** +

## Peptide No.843

**SDLSRELEEISER**

**Confirmed sites:**

**Ambiguous sites:** @S:1orS:4

MS/MS Fragmentation of **SDLSRELEEISER**

Found in **MYH7\_MOUSE**, Myosin-7 OS=Mus musculus GN=Myh7 PE=1 SV=1

Match to Query 3545: 1669.757577 from(557.593135,3+)

Title: Elution from: 55.404 to 55.404 scan no 5497 cid35.00 polarity:+:MA10



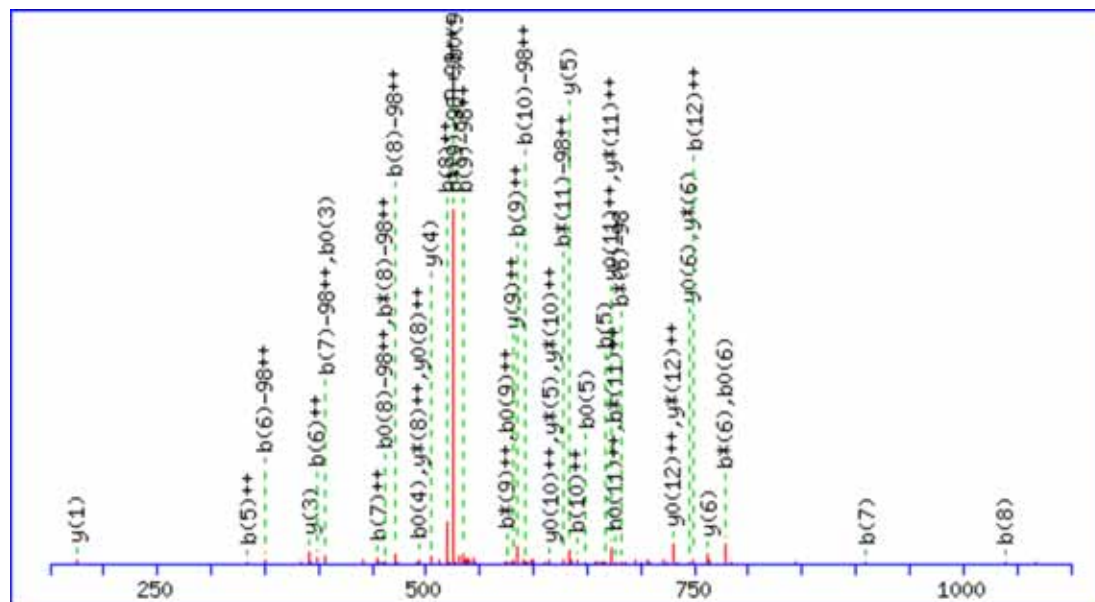

**Monoisotopic mass of neutral peptide Mr(calc):** 1669.7560

**Fixed modifications:** Carbamidomethyl (C) (apply to specified residues or termini only)

**Variable modifications:**

**N-term :** Dimethyl (N-term)

**S1 :** Phospho (ST), with neutral losses 0.0000(shown in table), 97.9769

**Ions Score:** 30 **Expect:** 0.04

**Matched b ions:** b(5)++, b(5), b(6)-98++, b(6)++, b(7), b(7)-98++, b(7)++, b(8), b(8)-98++, b(8)++, b(9)++, b(9)-98++, b(10)++, b(10)-98++, b(12)++

**Matched y ions:** y(1), y(3), y(4), y(5), y(6), y(9)++

**Precursor origin neutral loss:** +

## Peptide No.844

**SDLSRELEEISER**

**Confirmed sites:** @S:4

**Ambiguous sites:**

**MS/MS Fragmentation of SDLSRELEEISER**

Found in **MYH1\_MOUSE**, Myosin-1 OS=Mus musculus GN=Myh1 PE=1 SV=1

Match to Query 3095: 1675.788832 from(838.901692,2+)

Title: Elution from: 55.235 to 55.235 scan no 5287 cid35.00 polarity:+:MA10



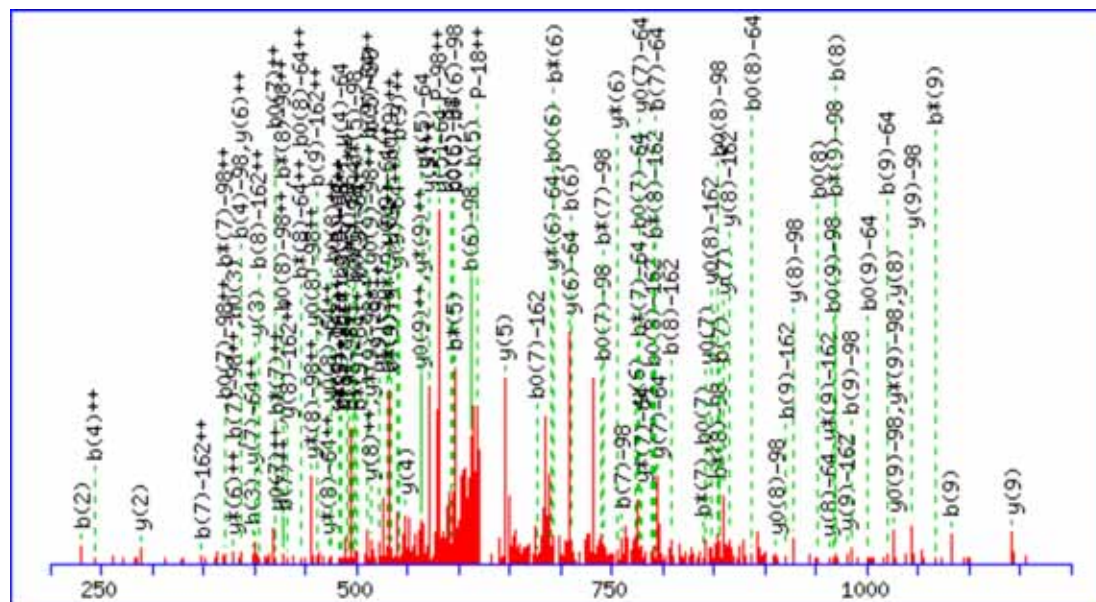

**Monoisotopic mass of neutral peptide Mr(calc):** 1256.5472

**Fixed modifications:** Carbamidomethyl (C) (apply to specified residues or termini only)

**Variable modifications:**

**N-term :** Dimethyl (N-term)

**S3 :** Phospho (ST), with neutral losses 0.0000(shown in table), 97.9769

**M7 :** Oxidation (M), with neutral losses 0.0000(shown in table), 63.9983

**Ions Score:** 33 **Expect:** 0.0095

**Matched b ions:** b(2), b(3), b(4)-98, b(4)++, b(4), b(5)-98, b(5), b(6)-98, b(6), b(7)-98++, b(7), b(7)-98, b(7)++, b(8), b(8)++, b(9)-98, b(9), b(9)-98++, b(9)++

**Matched y ions:** y(2), y(3), y(4), y(5), y(6)++, y(6), y(7), y(8), y(8)-98, y(8)++, y(9)-98, y(9), y(9)++, y(9)-98++

**Precursor origin neutral loss:** +

## Peptide No.846

**SDSSQPMLLR**

**Confirmed sites:** @S:3

**Ambiguous sites:**

**MS/MS Fragmentation of SDSSQPMLLR**

Found in **DMD\_MOUSE**, Dystrophin OS=Mus musculus GN=Dmd PE=1 SV=2

Match to Query 1300: 1262.578936 from(632.296744,2+)

Title: Elution from: 34.146 to 34.146 scan no 2703 cid35.00 polarity:+:MA10





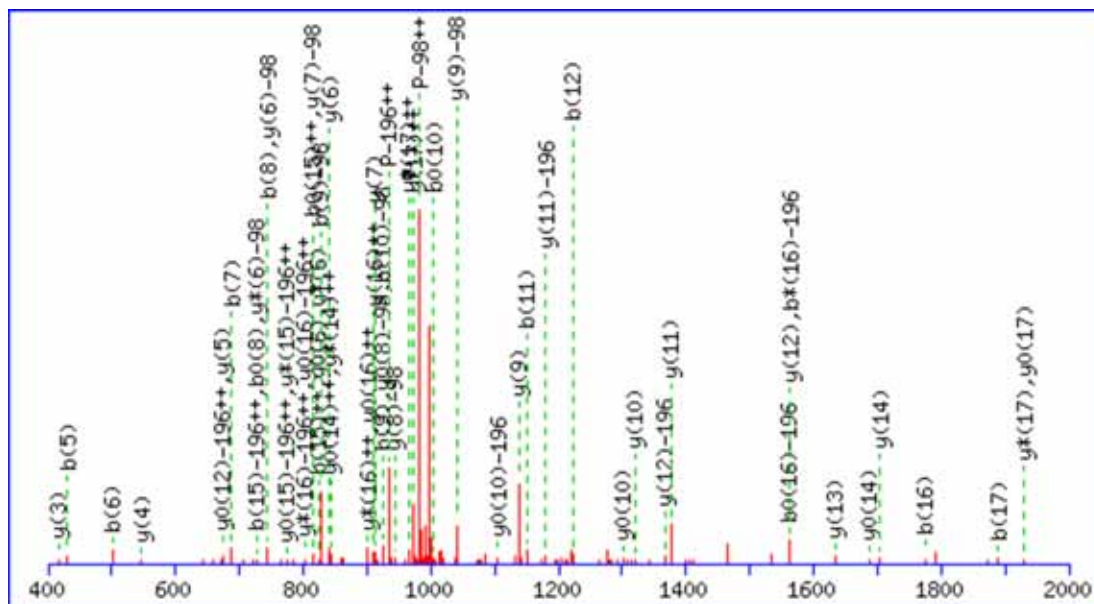

**Monoisotopic mass of neutral peptide Mr(calc):** 2061.8082

**Fixed modifications:** Carbamidomethyl (C) (apply to specified residues or termini only)

**Variable modifications:**

**N-term :** Dimethyl (N-term)

**T9 :** Phospho (ST), with neutral losses 0.0000(shown in table), 97.9769

**S13 :** Phospho (ST), with neutral losses 0.0000(shown in table), 97.9769

**Ions Score:** 60 **Expect:** 2.5e-005

**Matched b ions:** b(5), b(6), b(7), b(8), b(9)-98, b(9), b(10)-98, b(11), b(12), b(13)-98, b(15)-98++, b(15)-196++, b(15)++, b(16), b(17)-98, b(17)

**Matched y ions:** y(3), y(4), y(5), y(6)-98, y(6), y(7)-98, y(7), y(8)-98, y(9)-98, y(9), y(10)-98, y(10), y(11), y(11)-98, y(11)-196, y(12)-98, y(12), y(12)-196, y(13), y(13)-98, y(14), y(16)++, y(16)-98++, y(17)++, y(17)-98++

**Precursor origin neutral loss:** +

## Peptide No.848

**SFISSPSSPSR**

**Confirmed sites:** @S:5,@S:6

**Ambiguous sites:**

MS/MS Fragmentation of **SFISSPSSPSR**

Found in **SRBS2\_MOUSE**, Sorbin and SH3 domain-containing protein 2 OS=Mus musculus GN=Sorbs2 PE=1 SV=2

Match to Query 1871: 1425.559834 from(713.787193,2+)

Title: Elution from: 36.175 to 36.175 scan no 2950 cid35.00 polarity:+:MA10



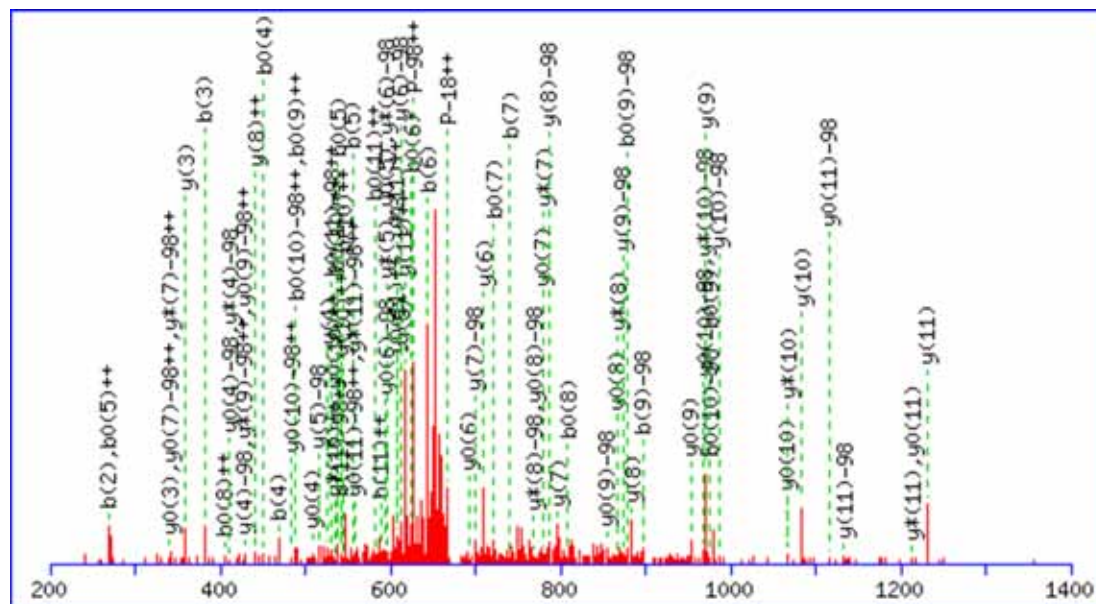

**Monoisotopic mass of neutral peptide Mr(calc):** 1351.6233

**Fixed modifications:** Carbamidomethyl (C) (apply to specified residues or termini only)

**Variable modifications:**

**N-term :** Dimethyl:2H(4)13C(2) (N-term)

**S9 :** Phospho (ST), with neutral losses 0.0000(shown in table), 97.9769

**Ions Score:** 31 **Expect:** 0.024

**Matched b ions:** b(2), b(3), b(4), b(5), b(6), b(7), b(9)-98, b(10)++, b(11)-98++, b(11)++

**Matched y ions:** y(3), y(4)-98, y(4), y(5)-98, y(5), y(6), y(6)-98, y(7), y(7)-98, y(8), y(8)-98, y(8)++, y(9), y(9)-98, y(10), y(10)-98, y(10)++, y(11), y(11)-98, y(11)++

**Precursor origin neutral loss:** +

## Peptide No.850

**SFSEPLGR**

**Confirmed sites:** @S:3

**Ambiguous sites:**

**MS/MS Fragmentation of SFSEPLGR**

Found in **MLF1\_MOUSE**, Myeloid leukemia factor 1 OS=Mus musculus GN=Mlf1 PE=1 SV=1

Match to Query 458: 999.442634 from(500.728593,2+)

Title: Elution from: 40.415 to 40.415 scan no 3721 cid35.00 polarity+:MA10

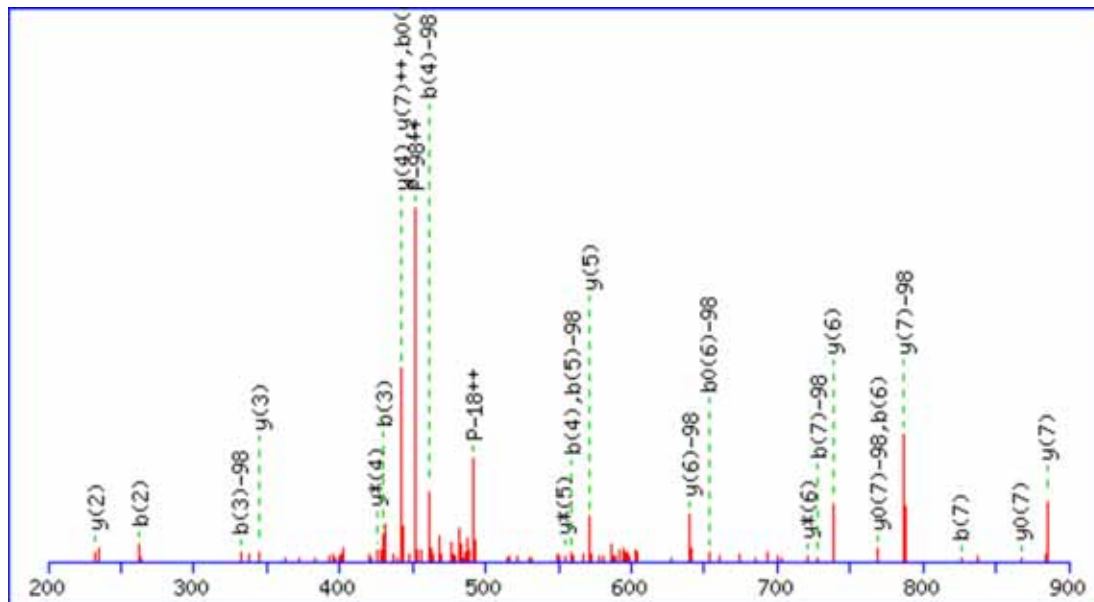

**Monoisotopic mass of neutral peptide Mr(calc):** 999.4426

**Fixed modifications:** Carbamidomethyl (C) (apply to specified residues or termini only)

**Variable modifications:**

**N-term :** Dimethyl (N-term)

**S3 :** Phospho (ST), with neutral losses 97.9769(shown in table), 0.0000

**Ions Score:** 33 **Expect:** 0.0055

**Matched b ions:** b(2), b(3), b(3)-98, b(4)-98, b(4), b(5)-98, b(6), b(7), b(7)-98

**Matched y ions:** y(2), y(3), y(4), y(5), y(6)-98, y(6), y(7)-98, y(7), y(7)++

**Precursor origin neutral loss:** +

## Peptide No.851

**SGDNSSSSLGDVVTGTR**

**Confirmed sites:** @S:5,@S:6

**Ambiguous sites:**

MS/MS Fragmentation of **SGDNSSSSLGDVVTGTR**

Found in **CACB1\_MOUSE**, Voltage-dependent L-type calcium channel subunit beta-1 OS=Musculus GN=Cacnb1 PE=1 SV=1

Match to Query 5196: 1825.713812 from(913.864182,2+)

Title: Elution from: 42.484 to 42.484 scan no 3985 cid35.00 polarity:+:MA10:m1s



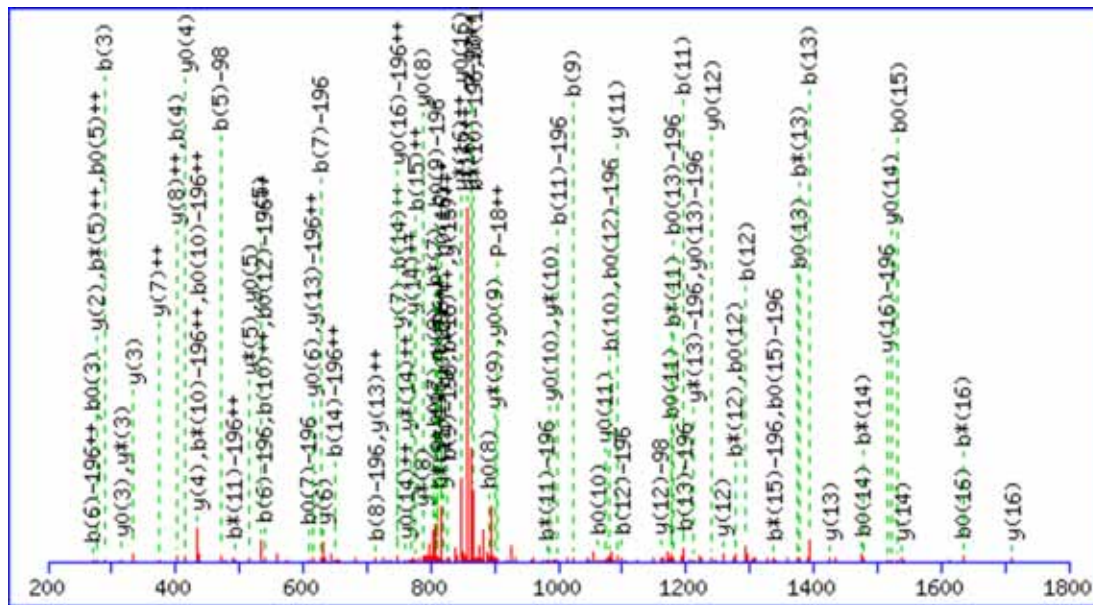

**Monoisotopic mass of neutral peptide Mr(calc):** 1825.7132

**Fixed modifications:** Carbamidomethyl (C) (apply to specified residues or termini only)

**Variable modifications:**

**N-term :** Dimethyl (N-term)

**S5 :** Phospho (ST), with neutral losses 0.0000(shown in table), 97.9769

**S6 :** Phospho (ST), with neutral losses 0.0000(shown in table), 97.9769

**Ions Score:** 70 **Expect:** 2.2e-006

**Matched b ions:** b(3), b(4), b(5)-98, b(6)-196, b(6)-196++, b(7)-98, b(7)-196, b(8)-196, b(8)-98, b(9), b(9)-98, b(9)-196, b(10), b(10)++, b(10)-98, b(11), b(11)-196, b(11)-98, b(12), b(12)-98, b(12)-196, b(13), b(13)-98, b(13)-196, b(14)++, b(14)-196++, b(15)++, b(16)++

**Matched y ions:** y(2), y(3), y(4), y(5), y(6), y(7), y(7)++, y(8)++, y(8), y(11), y(12), y(12)-98, y(13)++, y(13)-196++, y(13), y(13)-98, y(14), y(14)++, y(15)++, y(16)++, y(16), y(16)-98, y(16)-98++, y(16)-196

**Precursor origin neutral loss:** +

## Peptide No.852

**SGDNSSSSLGDVVTGTR**

**Confirmed sites:** @S:6,@S:7

**Ambiguous sites:**

**MS/MS Fragmentation of** **SGDNSSSSLGDVVTGTR**

Found in **CACB1\_MOUSE**, Voltage-dependent L-type calcium channel subunit beta-1 OS=Mus musculus GN=Cacnb1 PE=1 SV=1

Match to Query 3827: 1825.713966 from(913.864259,2+)

Title: Elution from: 42.450 to 42.450 scan no 3809 cid35.00 polarity:+:MA10

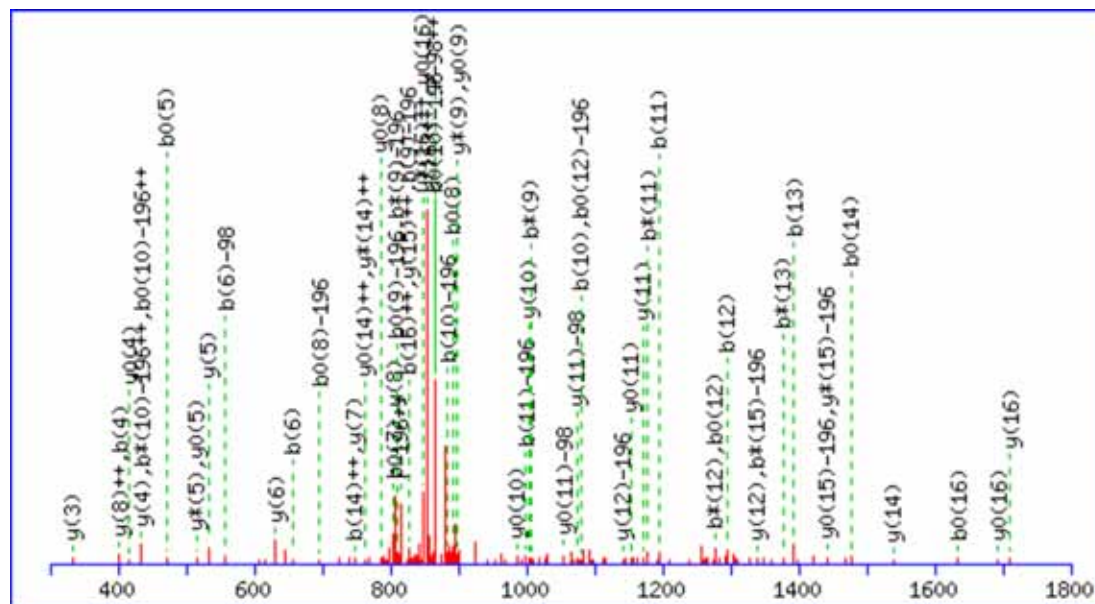

**Monoisotopic mass of neutral peptide Mr(calc):** 1825.7132

**Fixed modifications:** Carbamidomethyl (C) (apply to specified residues or termini only)

**Variable modifications:**

**N-term :** Dimethyl (N-term)

**S6 :** Phospho (ST), with neutral losses 0.0000(shown in table), 97.9769

**S7 :** Phospho (ST), with neutral losses 0.0000(shown in table), 97.9769

**Ions Score:** 50 **Expect:** 0.00022

**Matched b ions:** b(4), b(6)-98, b(6), b(7)-98, b(8)-98, b(9)-196, b(9)-98, b(10)-196, b(10), b(11), b(11)-98, b(11)-196, b(12), b(12)-98, b(13), b(13)-98, b(14)++, b(16)++

**Matched y ions:** y(3), y(4), y(5), y(6), y(7), y(8)++, y(8), y(10), y(11), y(11)-98, y(12), y(12)-196, y(12)-98, y(13)-98, y(14), y(14)-98, y(15)++, y(16)-98, y(16)++, y(16)

**Precursor origin neutral loss:** +

## Peptide No.853

**SGDNSSSSLGDVVTGTR**

**Confirmed sites:** @S:6,@S:7,@S:8

**Ambiguous sites:**

**MS/MS Fragmentation of** **SGDNSSSSLGDVVTGTR**

Found in **CACB1\_MOUSE**, Voltage-dependent L-type calcium channel subunit beta-1 OS=Musculus musculus GN=Cacnb1 PE=1 SV=1

Match to Query 3933: 1905.678622 from(953.846587,2+)

Title: Elution from: 46.825 to 46.825 scan no 4224 cid35.00 polarity:+:MA10:m1s







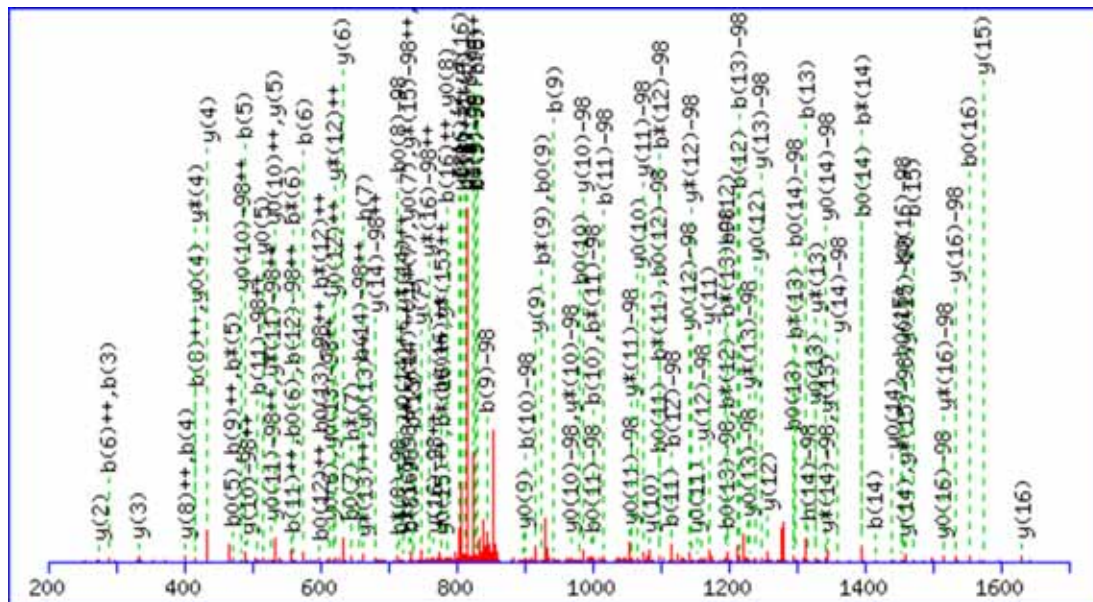

**Monoisotopic mass of neutral peptide Mr(calc):** 1745.7469

**Fixed modifications:** Carbamidomethyl (C) (apply to specified residues or termini only)

**Variable modifications:**

**N-term :** Dimethyl (N-term)

**S8 :** Phospho (ST), with neutral losses 0.0000(shown in table), 97.9769

**Ions Score:** 91 **Expect:** 2.8e-008

**Matched b ions:** b(3), b(4), b(5), b(6)++, b(6), b(7), b(8)-98, b(8)++, b(8), b(9)++, b(9)-98, b(9), b(10), b(10)-98, b(11)++, b(11), b(11)-98, b(11)-98++, b(12)-98++, b(12), b(12)-98, b(13), b(13)-98, b(14), b(14)-98++, b(14)-98, b(15), b(15)++, b(16)++

**Matched y ions:** y(2), y(3), y(4), y(5), y(6), y(7), y(8)++, y(8), y(9), y(10)-98, y(10), y(10)-98++, y(11), y(11)-98, y(12), y(12)-98, y(13), y(13)-98, y(14), y(14)-98++, y(14)++, y(14)-98, y(15), y(16)++, y(16), y(16)-98, y(16)-98++

**Precursor origin neutral loss:** +

## Peptide No.856

**SGDNSSSSLGDVVTGTR**

**Confirmed sites:** @S:6,@S:7

**Ambiguous sites:**

**MS/MS Fragmentation of** **SGDNSSSSLGDVVTGTR**

Found in **CACB1\_MOUSE**, Voltage-dependent L-type calcium channel subunit beta-1 OS=Mus musculus GN=Cacnb1 PE=1 SV=1

Match to Query 3629: 1831.745782 from(916.880167,2+)

Title: Elution from: 42.681 to 42.681 scan no 3830 cid35.00 polarity:+:MA10

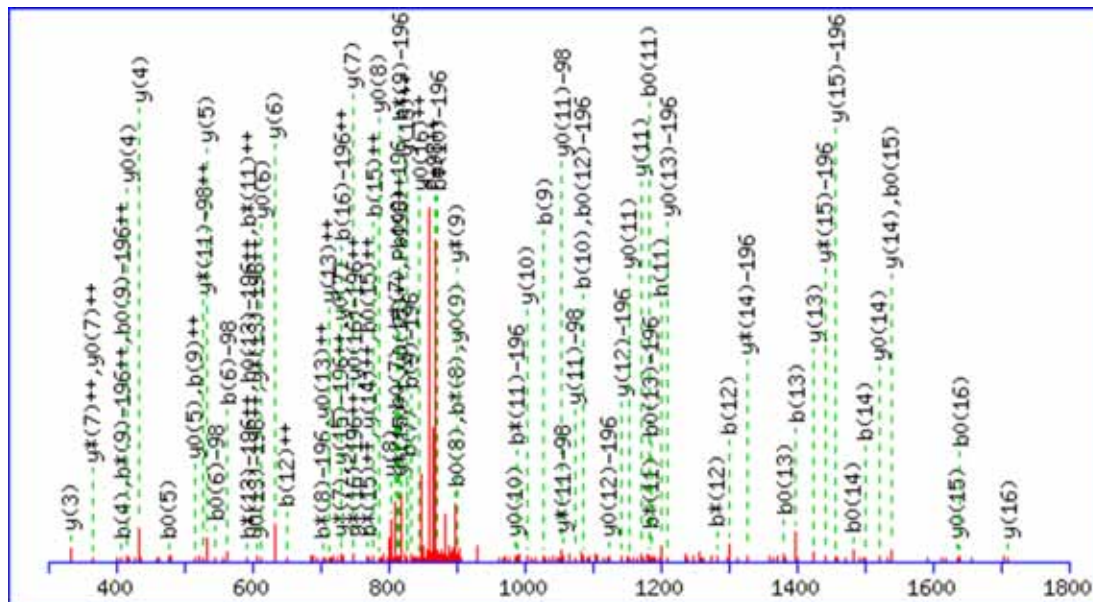

**Monoisotopic mass of neutral peptide Mr(calc):** 1831.7451

**Fixed modifications:** Carbamidomethyl (C) (apply to specified residues or termini only)

**Variable modifications:**

**N-term :** Dimethyl:2H(4)13C(2) (N-term)

**S6 :** Phospho (ST), with neutral losses 0.0000(shown in table), 97.9769

**S7 :** Phospho (ST), with neutral losses 0.0000(shown in table), 97.9769

**Ions Score:** 35 **Expect:** 0.008

**Matched b ions:** b(4), b(6)-98, b(7)-98, b(7)-98++, b(7), b(8)-98, b(9)++, b(9), b(9)-98, b(9)-196, b(10)-98, b(10), b(11), b(11)-98, b(12), b(12)-98, b(12)++, b(13), b(13)-98, b(13)-98++, b(14), b(14)-98, b(15)-98, b(15)-98++, b(15)++, b(16)-196++

**Matched y ions:** y(3), y(4), y(5), y(6), y(7), y(8), y(10), y(11), y(11)-98, y(12)-196, y(12)-98, y(13), y(13)-98, y(13)++, y(14), y(14)-98, y(14)++, y(15)-196, y(15)-196++, y(15)-98++, y(15)++, y(16)-98, y(16), y(16)-98++

**Precursor origin neutral loss:** +

## Peptide No.857

**SGDNSSSSLGDVVTGTR**

**Confirmed sites:** @S:7,@S:8

**Ambiguous sites:**

MS/MS Fragmentation of **SGDNSSSSLGDVVTGTR**

Found in **CACB1\_MOUSE**, Voltage-dependent L-type calcium channel subunit beta-1 OS=Mus musculus GN=Cacnb1 PE=1 SV=1

Match to Query 3981: 1831.745818 from(916.880185,2+)

Title: Elution from: 42.460 to 42.460 scan no 3836 cid35.00 polarity:+:MA10

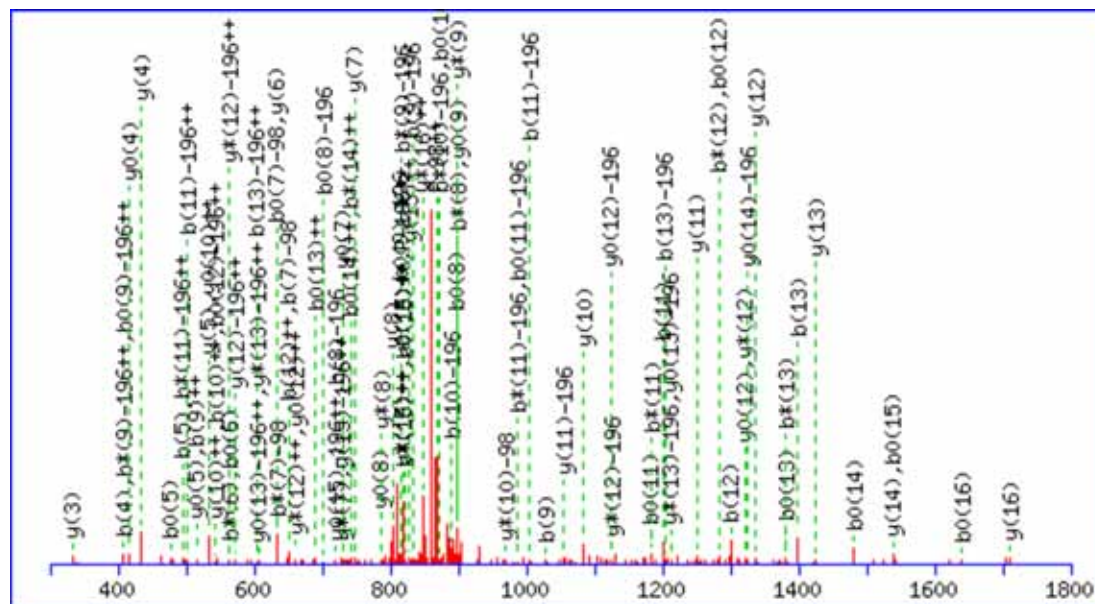

**Monoisotopic mass of neutral peptide Mr(calc):** 1831.7451

**Fixed modifications:** Carbamidomethyl (C) (apply to specified residues or termini only)

**Variable modifications:**

**N-term :** Dimethyl:2H(4)13C(2) (N-term)

**S7 :** Phospho (ST), with neutral losses 0.0000(shown in table), 97.9769

**S8 :** Phospho (ST), with neutral losses 0.0000(shown in table), 97.9769

**Ions Score:** 59 **Expect:** 3.7e-005

**Matched b ions:** b(4), b(5), b(7)-98, b(8)-98, b(8)-196, b(9), b(9)++, b(9)-196, b(9)-98, b(10)-98++, b(10)-98, b(10)++, b(10)-196, b(11), b(11)-196, b(11)-98, b(11)-196++, b(12)++, b(12), b(12)-98, b(13)-98++, b(13), b(13)-98, b(13)-196++, b(13)-196, b(14)-98++, b(15)-98++

**Matched y ions:** y(3), y(4), y(5), y(6), y(7), y(8), y(10), y(10)++, y(11), y(11)-196, y(11)-98, y(12), y(12)-196++, y(13), y(14), y(15)-196++, y(15)++, y(16), y(16)-98++

**Precursor origin neutral loss:** +

## Peptide No.858

**SGDNSSSSLGDVVTGTR**

**Confirmed sites:** @S:8

**Ambiguous sites:**

**MS/MS Fragmentation of** **SGDNSSSSLGDVVTGTR**

Found in **CACB1\_MOUSE**, Voltage-dependent L-type calcium channel subunit beta-1 OS=Mus musculus GN=Cacnb1 PE=1 SV=1

Match to Query 3130: 1751.779474 from(876.897013,2+)

Title: Elution from: 38.112 to 38.112 scan no 3179 cid35.00 polarity:+:MA10

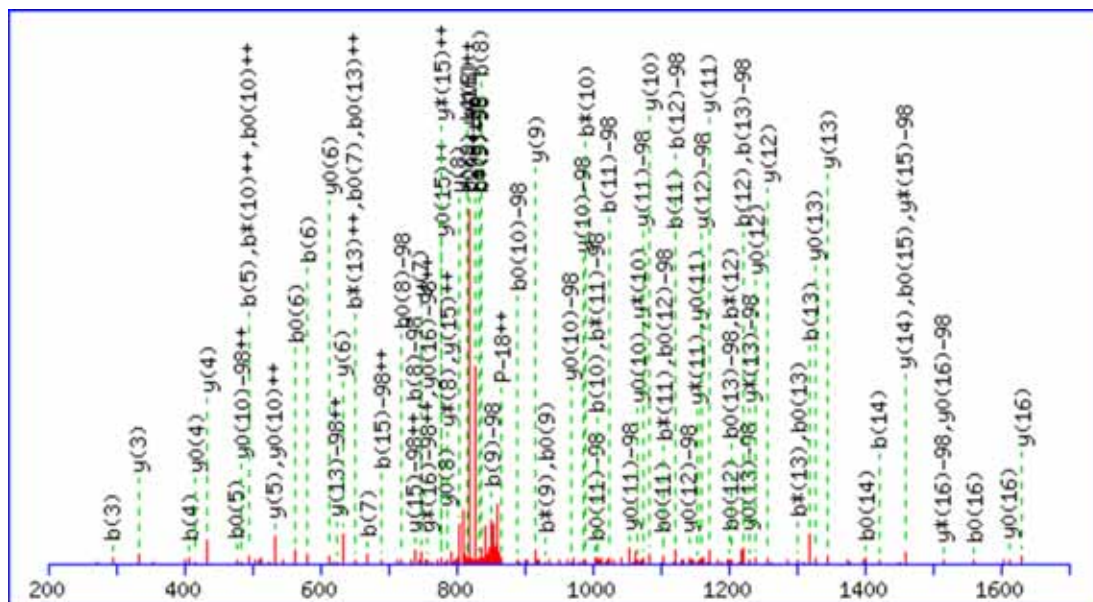

**Monoisotopic mass of neutral peptide Mr(calc): 1751.7787**

**Fixed modifications:** Carbamidomethyl (C) (apply to specified residues or termini only)

**Variable modifications:**

**N-term :** Dimethyl:2H(4)13C(2) (N-term)

**S8 :** Phospho (ST), with neutral losses 0.0000(shown in table), 97.9769

**Ions Score:** 91 **Expect:** 3.5e-008

**Matched b ions:** b(3), b(4), b(5), b(6), b(7), b(8)-98, b(8), b(9)-98, b(10), b(11), b(11)-98, b(12), b(12)-98, b(13)-98, b(13), b(14), b(15)-98++

**Matched y ions:** y(3), y(4), y(5), y(6), y(7), y(8), y(9), y(10), y(10)-98, y(11), y(11)-98, y(12), y(12)-98, y(13), y(13)-98++, y(14), y(15)-98++, y(15)++, y(16), y(16)++

**Precursor origin neutral loss:** +

## Peptide No.859

**SGENEAQKEDSEDTGELSESQEK**

**Confirmed sites:** @S:11

**Ambiguous sites:**

MS/MS Fragmentation of **SGENEAQKEDSEDTGELSESQEK**

Found in **SH3BG\_MOUSE**, SH3 domain-binding glutamic acid-rich protein OS=Mus musculus  
GN=Sh3bgr PE=2 SV=1

Match to Query 6372: 2689.115241 from(897.379023,3+)

Title: Elution from: 28.349 to 28.349 scan no 1922 cid35.00 polarity:+MA10:m1s



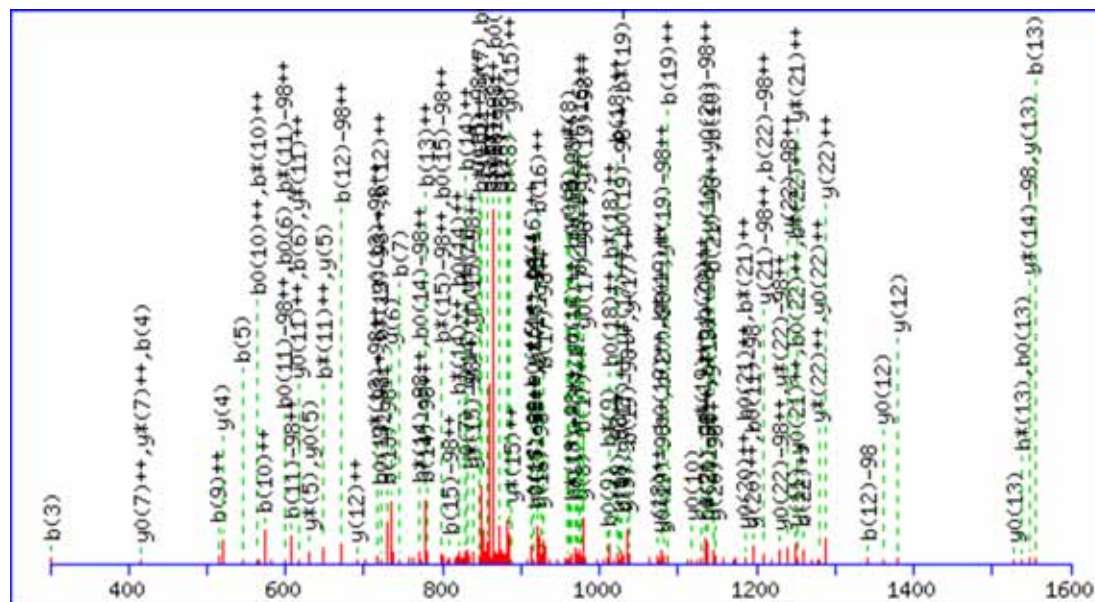

**Monoisotopic mass of neutral peptide Mr(calc):** 2689.1127

**Fixed modifications:** Carbamidomethyl (C) (apply to specified residues or termini only)

**Variable modifications:**

**N-term :** Dimethyl (N-term)

**K8 :** Dimethyl (K)

**S11 :** Phospho (ST), with neutral losses 97.9769(shown in table), 0.0000

**K23 :** Dimethyl (K)

**Ions Score:** 76 **Expect:** 1.3e-006

**Matched b ions:** b(3), b(4), b(5), b(6), b(7), b(9)++, b(9), b(10)++, b(10), b(11)-98++, b(12)-98, b(12)-98++, b(12)++, b(13)++, b(13), b(13)-98++, b(14)-98++, b(14)++, b(15)-98++, b(15)++, b(16)++, b(16)-98++, b(17)++, b(17)-98++, b(18)++, b(18)-98++, b(19)-98++, b(19)++, b(20)++, b(20)-98++, b(21)-98++, b(22)++, b(22)-98++

**Matched y ions:** y(4), y(5), y(6), y(7), y(8), y(9), y(10), y(11), y(12), y(12)++, y(13), y(14)++, y(15)-98++, y(16)++, y(16)-98++, y(17)++, y(18)++, y(18)-98++, y(19)++, y(20)++, y(20)-98++, y(21)-98++, y(22)++, y(22)-98++

**Precursor origin neutral loss:** +

## Peptide No.860

**SGENEAQKEDSEDTGELSESQEK**

**Confirmed sites:** @S:11

**Ambiguous sites:**

MS/MS Fragmentation of **SGENEAQKEDSEDTGELSESQEK**

Found in **SH3BG\_MOUSE**, SH3 domain-binding glutamic acid-rich protein OS=Mus musculus  
GN=Sh3bgr PE=2 SV=1

Match to Query 6875: 2707.209180 from(903.410336,3+)

Title: Elution from: 28.384 to 28.384 scan no 1896 cid35.00 polarity:+:MA10:m1s

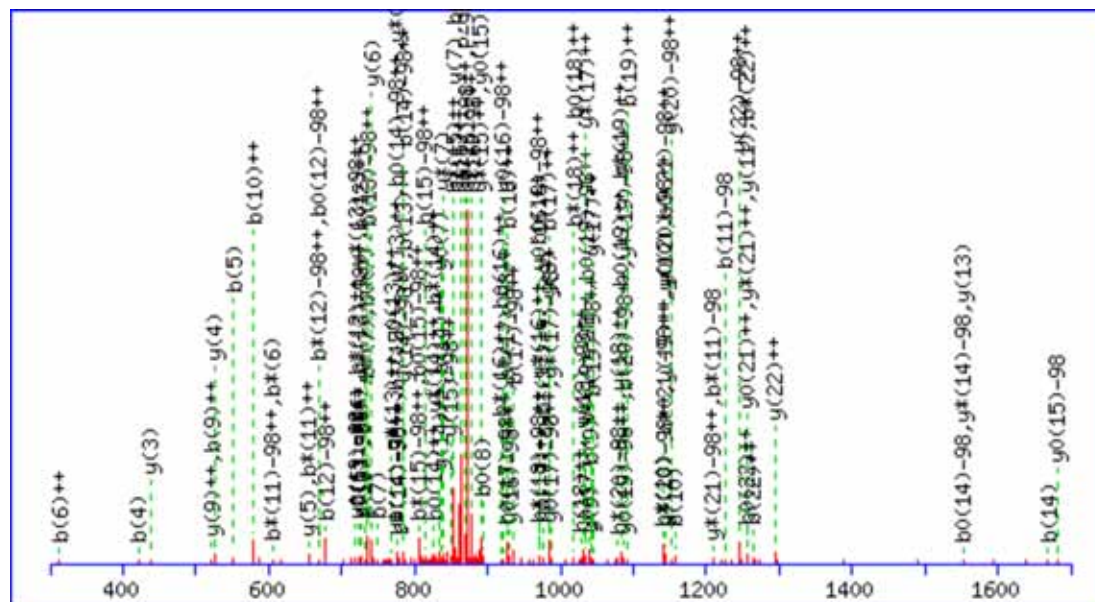

**Monoisotopic mass of neutral peptide Mr(calc): 2707.2081**

**Fixed modifications:** Carbamidomethyl (C) (apply to specified residues or termini only)

**Variable modifications:**

**N-term :** Dimethyl:2H(4)13C(2) (N-term)

**K8 :** Dimethyl:2H(4)13C(2) (K)

**S11 :** Phospho (ST), with neutral losses 97.9769(shown in table), 0.0000

**K23 :** Dimethyl:2H(4)13C(2) (K)

**Ions Score: 52 Expect: 0.00058**

**Matched b ions:** b(4), b(5), b(6)++, b(7), b(9)++, b(9), b(10)++, b(10), b(11)-98, b(12)-98, b(12)++, b(13)-98, b(13)++, b(14), b(14)-98, b(14)++, b(15)-98, b(15)++, b(16)++, b(16)-98, b(17)++, b(17)-98, b(18)++, b(19)-98, b(19)++, b(20)-98, b(22)++

**Matched y ions:** y(3), y(4), y(5), y(6), y(7), y(8), y(9), y(9)++, y(10), y(11), y(13), y(13)++, y(13)-98, y(14)-98, y(14)++, y(15)-98, y(15)++, y(16)-98, y(16)++, y(17)++, y(18)-98, y(18)++, y(19)++, y(20)-98, y(22)-98, y(22)++

**Precursor origin neutral loss: +**

## Peptide No.861

**SGESGGSPGEASILDELK**

**Confirmed sites: @S:4,@S:7**

**Ambiguous sites:**

**MS/MS Fragmentation of SGESGGSPGEASILDELK**

Found in **SMTL1\_MOUSE**, Smoothelin-like protein 1 OS=Mus musculus GN=Smtnl1 PE=1 SV=1

Match to Query 5365: 1947.813412 from(974.913982,2+)

Title: Elution from: 63.796 to 63.796 scan no 6247 cid35.00 polarity:+:MA10:m1s

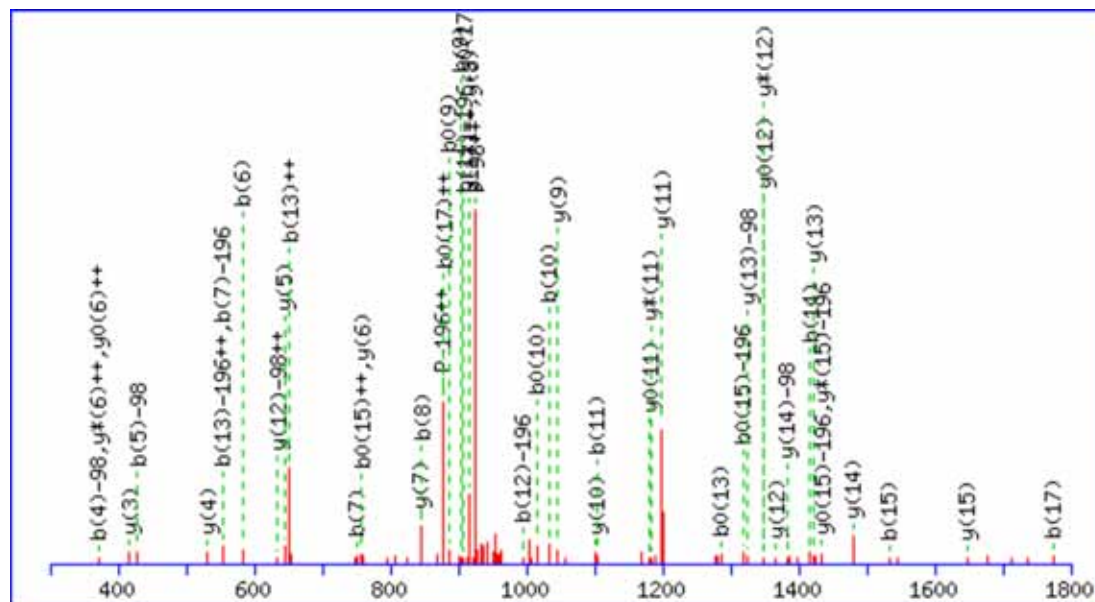

**Monoisotopic mass of neutral peptide Mr(calc):** 1947.8115

**Fixed modifications:** Carbamidomethyl (C) (apply to specified residues or termini only)

**Variable modifications:**

**N-term :** Dimethyl (N-term)

**S4 :** Phospho (ST), with neutral losses 0.0000(shown in table), 97.9769

**S7 :** Phospho (ST), with neutral losses 0.0000(shown in table), 97.9769

**K18 :** Dimethyl (K)

**Ions Score:** 68 **Expect:** 5.6e-006

**Matched b ions:** b(4)-98, b(5)-98, b(6), b(7)-196, b(7)-98, b(7), b(8)-98, b(8), b(9)-98, b(9), b(10), b(10)-98, b(11)-98, b(11), b(11)-196, b(12)-196, b(13)-196++, b(13)++, b(14)-98, b(14), b(15)-98, b(15), b(17)-98, b(17)

**Matched y ions:** y(3), y(4), y(5), y(6), y(7), y(8), y(9), y(10), y(11), y(12)-98++, y(12), y(13)-98, y(13), y(14), y(14)-98, y(15), y(17)-98++, y(17)-98, y(17)++

**Precursor origin neutral loss:** +

## Peptide No.862

**SGESGGSPGEASILDELK**

**Confirmed sites: @S:7**

**Ambiguous sites:**

MS/MS Fragmentation of **SGESGGSPGEASILDELK**

Found in **SMTL1\_MOUSE**, Smoothelin-like protein 1 OS=Mus musculus GN=Smtnl1 PE=1 SV=1

Match to Query 3830: 1867.846388 from(934.930470,2+)

Title: Elution from: 56.218 to 56.218 scan no 5120 cid35.00 polarity:+:MA10

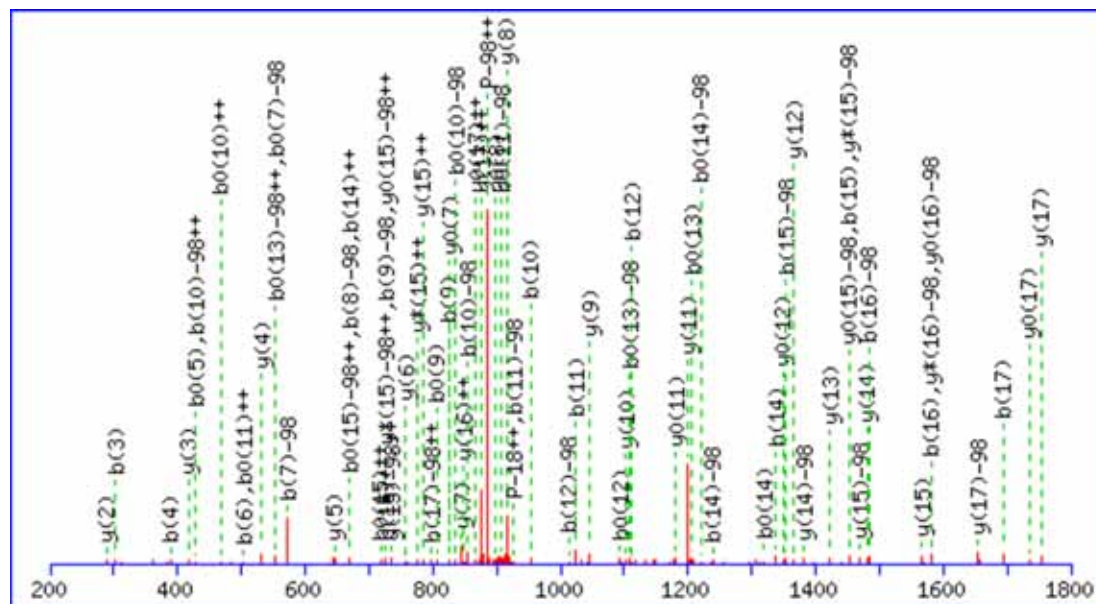

**Monoisotopic mass of neutral peptide Mr(calc):** 1867.8452

**Fixed modifications:** Carbamidomethyl (C) (apply to specified residues or termini only)

**Variable modifications:**

**N-term :** Dimethyl (N-term)

**S7 :** Phospho (ST), with neutral losses 0.0000(shown in table), 97.9769

**K18 :** Dimethyl (K)

**Ions Score:** 93 **Expect:** 2.7e-008

**Matched b ions:** b(3), b(4), b(6), b(7)-98, b(8)-98, b(9)-98, b(9), b(10)-98++, b(10)-98, b(10), b(11), b(11)-98, b(12)-98, b(12), b(14), b(14)++, b(14)-98, b(15), b(15)++, b(15)-98, b(16), b(16)-98, b(17), b(17)-98++

**Matched y ions:** y(2), y(3), y(4), y(5), y(6), y(7), y(8), y(9), y(10), y(11), y(12), y(13), y(14)-98, y(14), y(15)-98++, y(15), y(15)++, y(15)-98, y(16)++, y(17)-98, y(17)++, y(17)

**Precursor origin neutral loss:** +

## Peptide No.863

**SGPQCSSPTCQEETEDVR**

**Confirmed sites:** @S:7

**Ambiguous sites:**

**MS/MS Fragmentation of SGPQCSSPTCQEETEDVR**

Found in **PALMD\_MOUSE**, Palmdelphin OS=Mus musculus GN=Palmd PE=1 SV=1

Match to Query 6387: 2173.831394 from(1087.922973,2+)

Title: Elution from: 28.452 to 28.452 scan no 2091 cid35.00 polarity:+:MA10:m1s



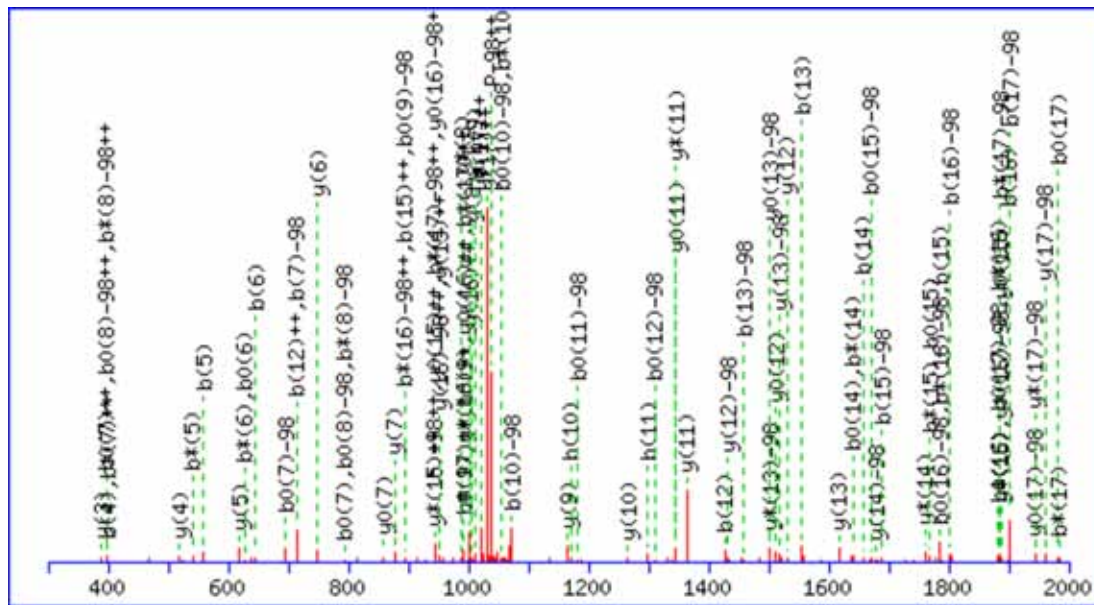

**Monoisotopic mass of neutral peptide Mr(calc):** 2173.8293

**Fixed modifications:** Carbamidomethyl (C) (apply to specified residues or termini only)

**Variable modifications:**

**N-term :** Dimethyl (N-term)

**S7 :** Phospho (ST), with neutral losses 0.0000(shown in table), 97.9769

**Ions Score:** 74 **Expect:** 9.8e-007

**Matched b ions:** b(4), b(5), b(6), b(7)-98, b(9), b(10), b(10)-98, b(11), b(12)++, b(12), b(13), b(13)-98, b(14), b(15), b(15)++, b(15)-98, b(16), b(16)-98, b(17)-98

**Matched y ions:** y(3), y(4), y(5), y(6), y(7), y(8), y(9), y(10), y(11), y(12)-98, y(12), y(13), y(13)-98, y(14)-98, y(15)++, y(16)-98, y(16)++, y(17)++, y(17)-98

**Precursor origin neutral loss:** +

## Peptide No.864

**SGSGMSVISSSSVDQR**

**Confirmed sites:** @S:3

**Ambiguous sites:**

MS/MS Fragmentation of **SGSGMSVISSSSVDQR**

Found in **ITSN1\_MOUSE**, Intersectin-1 OS=Mus musculus GN=Itsn1 PE=1 SV=1

Match to Query 3749: 1706.721822 from(569.914550,3+)

Title: Elution from: 31.830 to 31.830 scan no 2556 cid35.00 polarity:+:MA10:m1s

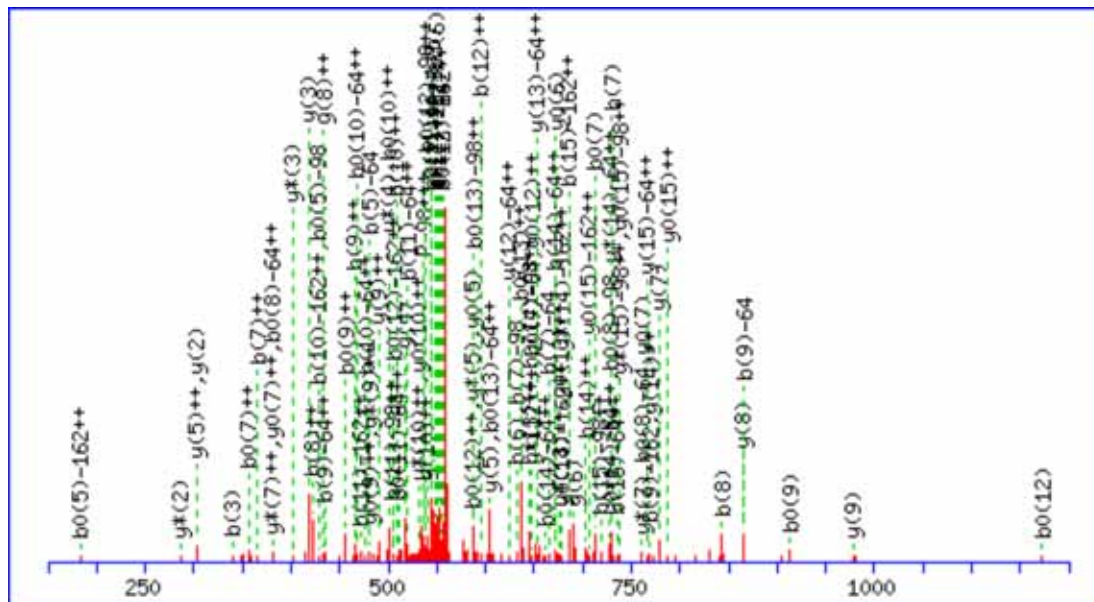

**Monoisotopic mass of neutral peptide Mr(calc):** 1706.7182

**Fixed modifications:** Carbamidomethyl (C) (apply to specified residues or termini only)

**Variable modifications:**

**N-term :** Dimethyl (N-term)

**S3 :** Phospho (ST), with neutral losses 0.0000(shown in table), 97.9769

**M5 :** Oxidation (M), with neutral losses 0.0000(shown in table), 63.9983

**Ions Score:** 42 **Expect:** 0.0017

**Matched b ions:** b(3), b(5), b(6), b(7), b(7)++, b(7)-98, b(8)++, b(8), b(9)++, b(10)++, b(11)++, b(11)-98++, b(12)-98++, b(12)++, b(13)++, b(14)++, b(15)-98++

**Matched y ions:** y(2), y(3), y(4), y(5)++, y(5), y(6), y(7), y(8), y(8)++, y(9), y(9)++, y(10)++, y(14)++

**Precursor origin neutral loss:**

## Peptide No.865

**SGSSSPDSEITELK**

**Confirmed sites:** @S:4,@S:5

**Ambiguous sites:**

**MS/MS Fragmentation of** **SGSSSPDSEITELK**

Found in **PYRG1\_MOUSE**, CTP synthase 1 OS=Mus musculus GN=Ctps PE=1 SV=2

Match to Query 3428: 1651.664366 from(826.839459,2+)

Title: Elution from: 46.305 to 46.305 scan no 4462 cid35.00 polarity:+:MA10

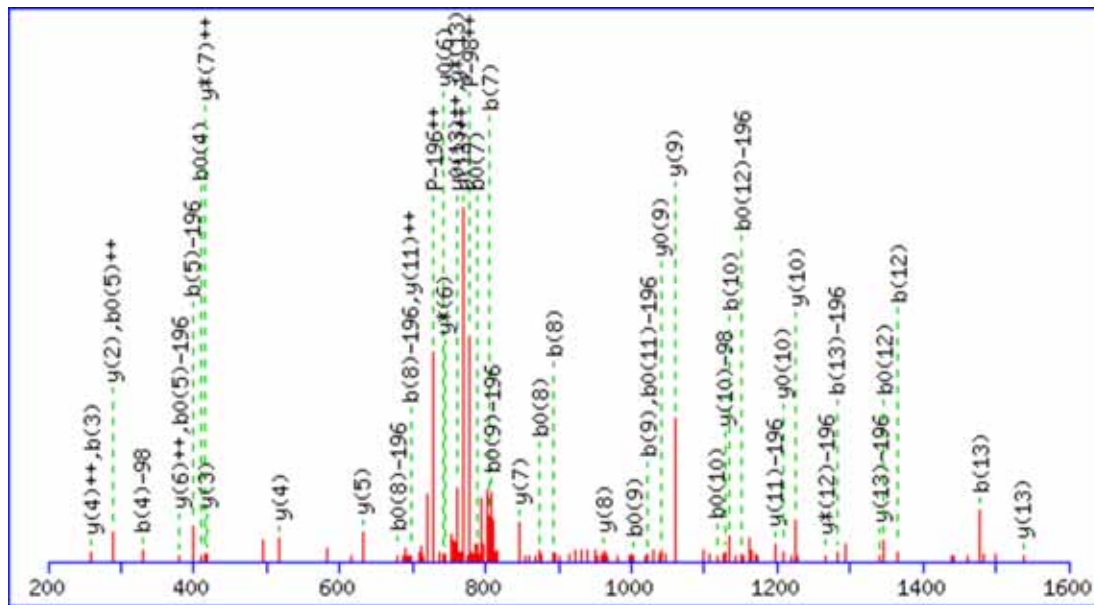

**Monoisotopic mass of neutral peptide Mr(calc):** 1651.6631

**Fixed modifications:** Carbamidomethyl (C) (apply to specified residues or termini only)

**Variable modifications:**

**N-term :** Dimethyl (N-term)

**S4 :** Phospho (ST), with neutral losses 97.9769(shown in table), 0.0000

**S5 :** Phospho (ST), with neutral losses 97.9769(shown in table), 0.0000

**K14 :** Dimethyl (K)

**Ions Score:** 49 **Expect:** 0.00027

**Matched b ions:** b(3), b(4)-98, b(5)-196, b(5)-98, b(7), b(7)-98, b(8)-98++, b(8), b(8)-196, b(8)-98, b(9)-98, b(9), b(10), b(10)-98, b(12), b(12)-98, b(13), b(13)-196, b(13)-98++

**Matched y ions:** y(2), y(3), y(4), y(4)++, y(5), y(6), y(6)++, y(7), y(8), y(9), y(10), y(10)-98, y(11)-98, y(11)-196, y(11)++, y(13)++, y(13)-98++, y(13)-98, y(13), y(13)-196

**Precursor origin neutral loss:** +

## Peptide No.866

**SGTPVHCPSPiR**

**Confirmed sites:** @S:9

**Ambiguous sites:**

**MS/MS Fragmentation of SGTPVHCPSPiR**

Found in **BAG3\_MOUSE**, BAG family molecular chaperone regulator 3 OS=Mus musculus GN=Bag3  
PE=1 SV=1

Match to Query 2082: 1414.640979 from(472.554269,3+)

Title: Elution from: 27.067 to 27.067 scan no 1903 cid35.00 polarity:+:MA10

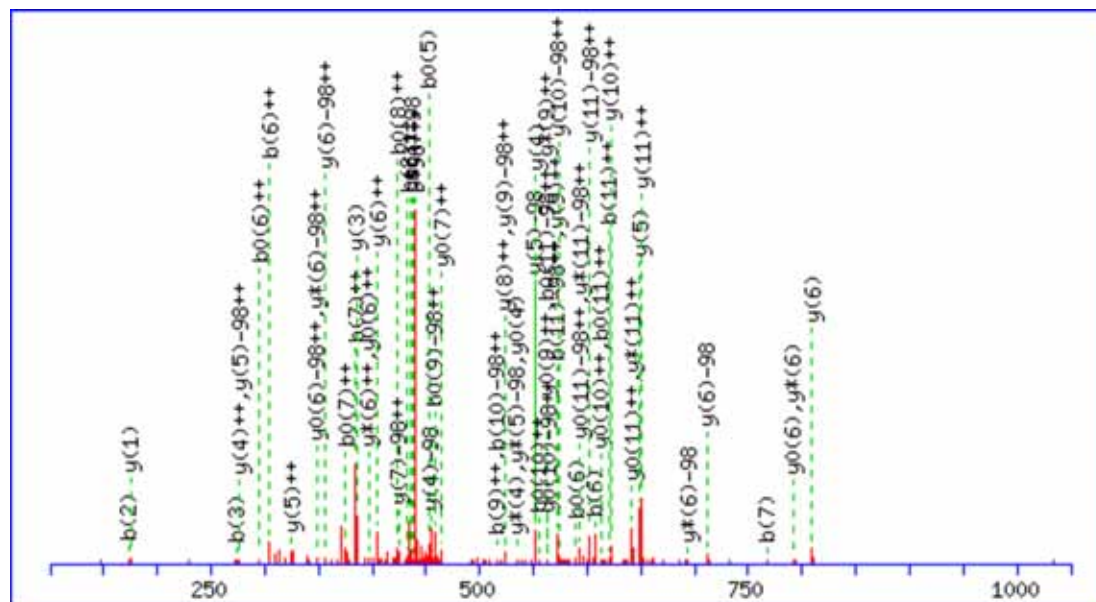

**Monoisotopic mass of neutral peptide Mr(calc):** 1414.6428

**Fixed modifications:** Carbamidomethyl (C) (apply to specified residues or termini only)

**Variable modifications:**

**N-term :** Dimethyl (N-term)

**S9 :** Phospho (ST), with neutral losses 0.0000(shown in table), 97.9769

**Ions Score:** 29 **Expect:** 0.045

**Matched b ions:** b(2), b(3), b(6)++, b(6), b(7)++, b(7), b(8)++, b(9)++, b(10)-98++, b(11)-98++, b(11)++

**Matched y ions:** y(1), y(3), y(4), y(4)-98, y(4)++, y(5)-98, y(5), y(5)++, y(5)-98++, y(6), y(6)-98, y(6)++, y(6)-98++, y(7)-98++, y(8)++, y(9)++, y(9)-98++, y(10)++, y(10)-98++, y(11)++, y(11)-98++

**Precursor origin neutral loss:** +

## Peptide No.867

**SGYSSPGSPGTPGSR**

**Confirmed sites:** @Y:3,@S:5,@S:8

**Ambiguous sites:**

**MS/MS Fragmentation of** **SGYSSPGSPGTPGSR**

Found in **TAU\_MOUSE**, Microtubule-associated protein tau OS=Mus musculus GN=Mapt PE=1 SV=3

Match to Query 3482: 1660.556810 from(831.285681,2+)

Title: Elution from: 28.960 to 28.960 scan no 2161 cid35.00 polarity:+:MA10





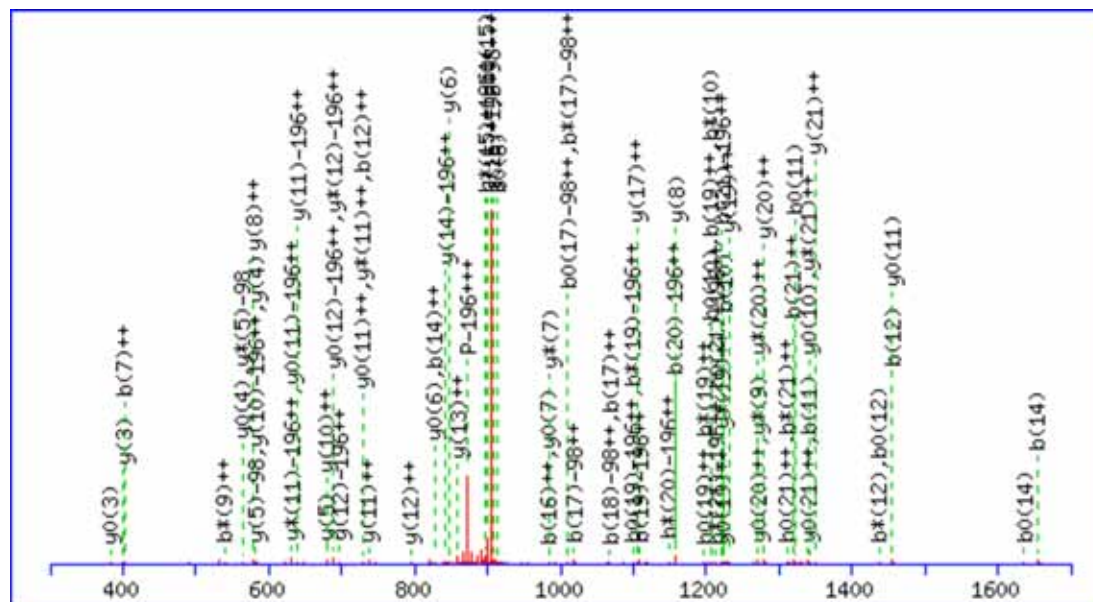

**Monoisotopic mass of neutral peptide Mr(calc):** 2811.1650

**Fixed modifications:** Carbamidomethyl (C) (apply to specified residues or termini only)

**Variable modifications:**

**N-term :** Dimethyl (N-term)

**S17 :** Phospho (ST), with neutral losses 0.0000(shown in table), 97.9769

**T19 :** Phospho (ST), with neutral losses 0.0000(shown in table), 97.9769

**Ions Score:** 32 **Expect:** 0.034

**Matched b ions:** b(7)++, b(10), b(11), b(12), b(12)++, b(14), b(14)++, b(15)++, b(16)++, b(17)-98++, b(17)++, b(18)-98++, b(19)-98++, b(19)-196++, b(19)++, b(20)-196++, b(20)-98++, b(21)-98++, b(21)++, b(21)-196++

**Matched y ions:** y(3), y(4), y(5)-98, y(5), y(6), y(8)-98++, y(8)++, y(8), y(10)-98++, y(10)++, y(10)-196++, y(11)-98++, y(11)++, y(11)-196++, y(12)-196++, y(12)++, y(13)++, y(14)-98++, y(14)-196++, y(15)-196++, y(17)++, y(18)-98++, y(19)++, y(20)++, y(20)-98++, y(21)++

**Precursor origin neutral loss:** +

## Peptide No.869

**SHSLDNPPVTTGPSPEACK**

**Confirmed sites: @S:1**

**Ambiguous sites:**

MS/MS Fragmentation of **SHSLDNPPVTTGPSPEACK**

Found in **OBSCN\_MOUSE**, Obscurin OS=Mus musculus GN=Obscn PE=2 SV=2

Match to Query 5315: 2128.952856 from(710.658228,3+)

Title: Elution from: 31.912 to 31.912 scan no 2355 cid35.00 polarity:+:MA10:m1s

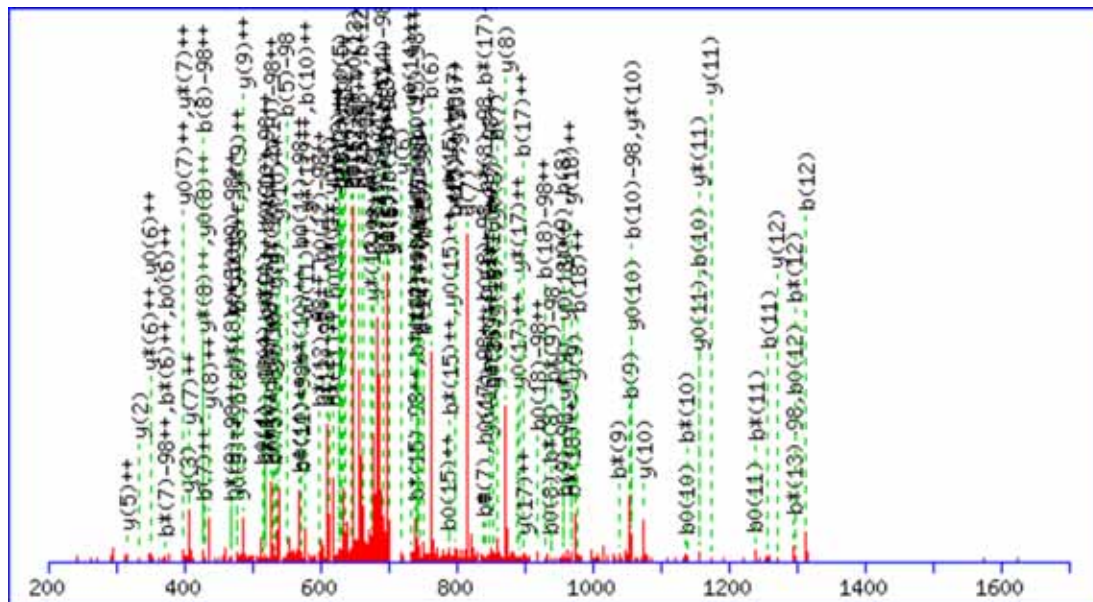

**Monoisotopic mass of neutral peptide Mr(calc):** 2128.9500

**Fixed modifications:** Carbamidomethyl (C) (apply to specified residues or termini only)

**Variable modifications:**

**N-term :** Dimethyl (N-term)

**S1 :** Phospho (ST), with neutral losses 0.0000(shown in table), 97.9769

**K19 :** Dimethyl (K)

**Ions Score:** 49 **Expect:** 0.00067

**Matched b ions:** b(4), b(5), b(5)-98, b(6), b(6)-98, b(7), b(7)++, b(8)++, b(8), b(8)-98, b(9)++, b(9), b(9)-98, b(10), b(10)-98, b(10)++, b(10)-98, b(11), b(11)++, b(12), b(12)++, b(12)-98, b(13)-98, b(14)++, b(14)-98, b(15)-98, b(15)++, b(17)-98, b(17)++, b(18)++, b(18)-98

**Matched y ions:** y(2), y(3), y(4), y(5)++, y(5), y(6), y(7)++, y(7), y(8), y(8)++, y(9), y(9)++, y(10)++, y(10), y(11), y(11)++, y(12), y(12)++, y(13)++, y(14)++, y(15)++, y(16)++, y(17)++, y(18)++

**Precursor origin neutral loss:**

## Peptide No.870

**SHSLDNPPVTTGPSPEACK**

**Confirmed sites:** @S:3

**Ambiguous sites:**

**MS/MS Fragmentation of SHSLDNPPVTTGPSPEACK**

Found in **OBSCN\_MOUSE**, Obscurin OS=Mus musculus GN=Obscn PE=2 SV=2

Match to Query 6249: 2128.951428 from(710.657752,3+)

Title: Elution from: 31.911 to 31.911 scan no 2567 cid35.00 polarity:+:MA10:m1s

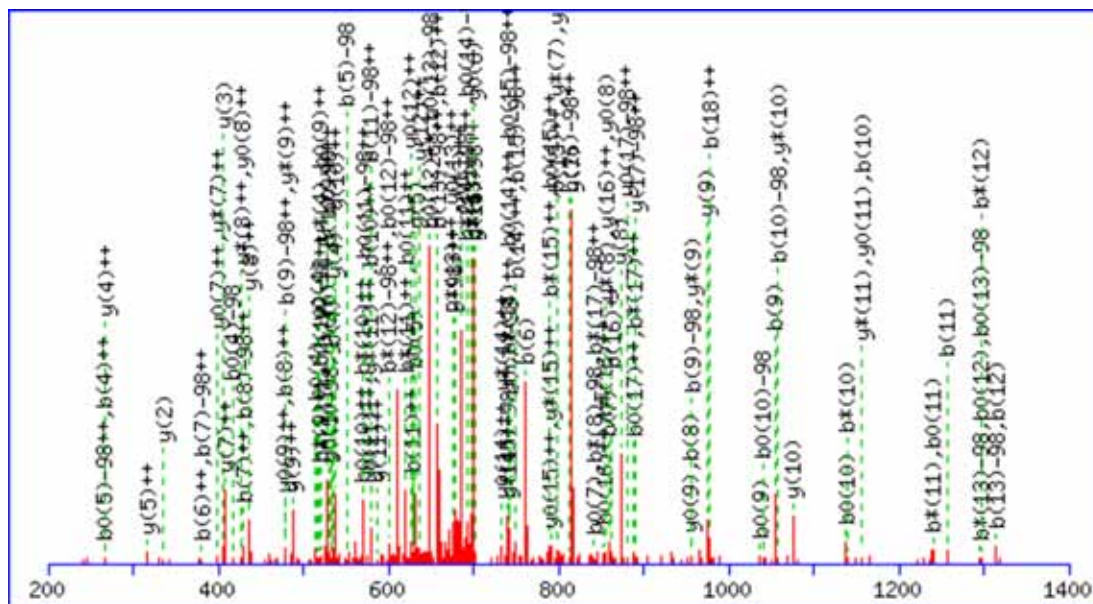

**Monoisotopic mass of neutral peptide Mr(calc):** 2128.9500

**Fixed modifications:** Carbamidomethyl (C) (apply to specified residues or termini only)

**Variable modifications:**

**N-term :** Dimethyl (N-term)

**S3 :** Phospho (ST), with neutral losses 0.0000(shown in table), 97.9769

**K19 :** Dimethyl (K)

**Ions Score:** 58 **Expect:** 9.8e-005

**Matched b ions:** b(4)++, b(4), b(5), b(5)-98, b(6), b(6)++, b(7)++, b(7), b(7)-98++, b(8)-98++, b(8)++, b(8), b(9)++, b(9), b(9)-98, b(9)-98++, b(10)++, b(10), b(10)-98, b(10)-98++, b(11), b(11)-98++, b(11)++, b(12), b(12)++, b(13)-98, b(13)-98++, b(14)++, b(14)-98++, b(15)-98++, b(15)++, b(16)++, b(16)-98++, b(18)++

**Matched y ions:** y(2), y(3), y(4), y(4)++, y(5)++, y(5), y(7)++, y(7), y(8), y(8)++, y(9), y(9)++, y(10)++, y(10), y(11)++, y(12)++, y(13)++, y(14)++, y(15)++, y(16)++, y(17)-98++

**Precursor origin neutral loss:**

## Peptide No.871

**SHSLDNPPVTTGPSPEACK**

**Confirmed sites: @S:3**

**Ambiguous sites:**

MS/MS Fragmentation of **SHSLDNPPVTTGPSPEACK**

Found in **OBSCN\_MOUSE**, Obscurin OS=Mus musculus GN=Obscn PE=2 SV=2

Match to Query 5709: 2141.016417 from(714.679415,3+)

Title: Elution from: 31.832 to 31.832 scan no 2386 cid35.00 polarity:+:MA10:m1s





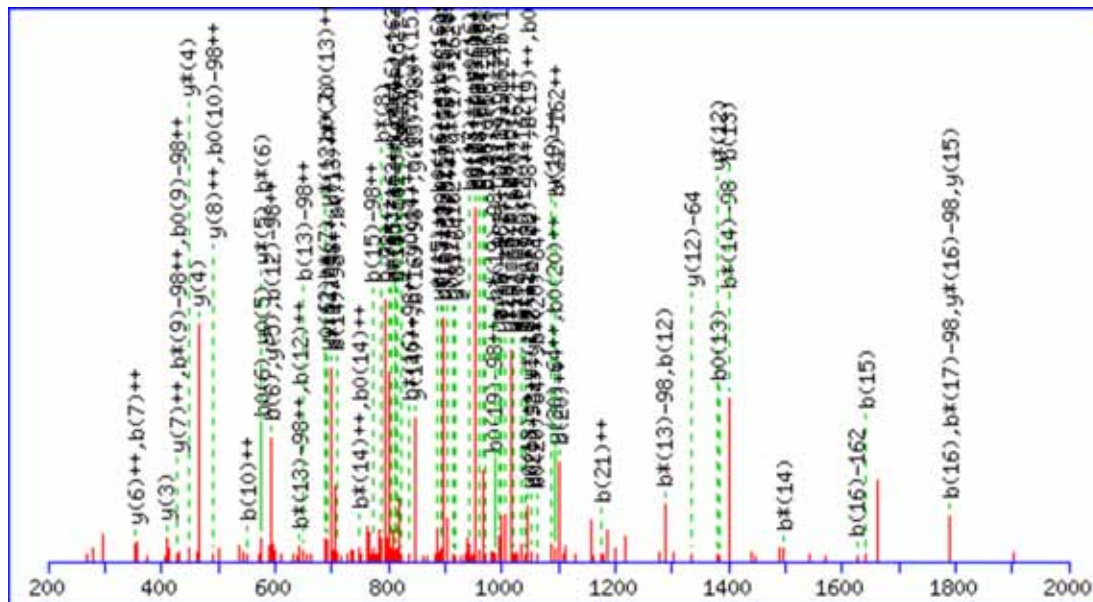

**Monoisotopic mass of neutral peptide Mr(calc):** 2497.1256

**Fixed modifications:** Carbamidomethyl (C) (apply to specified residues or termini only)

**Variable modifications:**

**K2 :** Dimethyl:2H(4)13C(2) (K)

**S9 :** Phospho (ST), with neutral losses 0.0000(shown in table), 97.9769

**M16 :** Oxidation (M), with neutral losses 0.0000(shown in table), 63.9983

**Ions Score:** 38 **Expect:** 0.011

**Matched b ions:** b(6), b(7)++, b(7), b(8), b(9), b(10)++, b(12)-98++, b(12), b(12)++, b(13)++, b(13), b(13)-98++, b(14)-98++, b(15), b(15)-98++, b(15)++, b(16), b(16)++, b(16)-98++, b(17)++, b(17)-98++, b(18)++, b(18)-98++, b(19)++, b(19)-98++, b(20)++, b(20)-98++, b(21)++

**Matched y ions:** y(3), y(4), y(5), y(6)++, y(7)++, y(8)++, y(14)++, y(15), y(15)++, y(15)-98++, y(16)++, y(16)-98++, y(17)-98++, y(18)++, y(19)++

**Precursor origin neutral loss:** +

## Peptide No.873

**SKSEEHAEDSVMDHHFR**

**Confirmed sites:** @S:1

**Ambiguous sites:**

MS/MS Fragmentation of **SKSEEHAEDSVMDHHFR**

Found in **PAIRB\_MOUSE**, Plasminogen activator inhibitor 1 RNA-binding protein OS=Mus musculus GN=Serbp1 PE=1 SV=2

Match to Query 5853: 2262.939920 from(566.742256,4+)

Title: Elution from: 27.491 to 27.491 scan no 1780 cid35.00 polarity:+:MA10:m1s

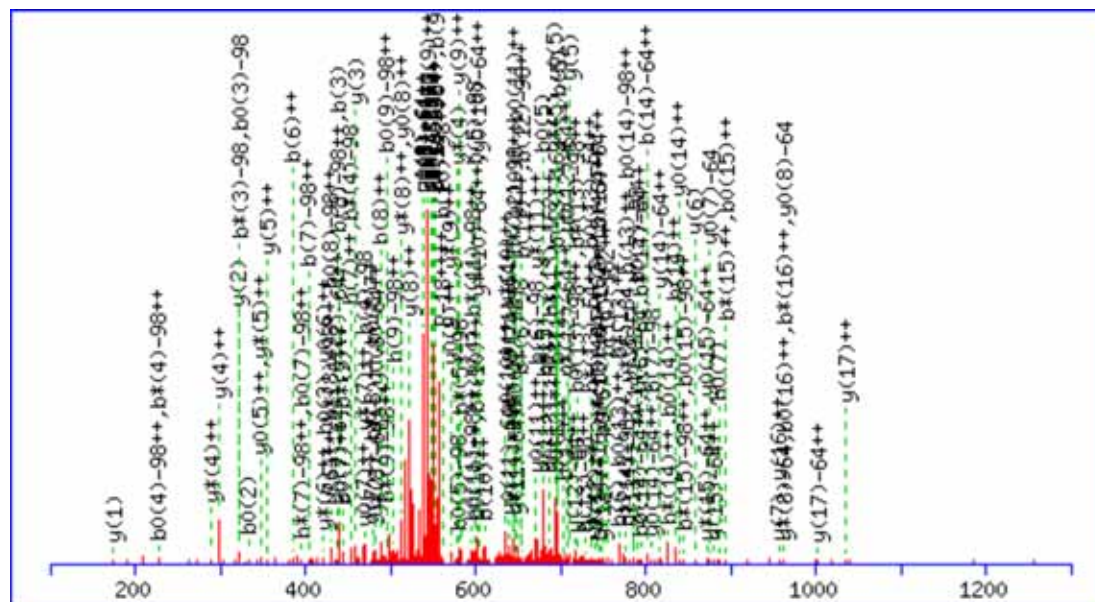

**Monoisotopic mass of neutral peptide Mr(calc):** 2262.9365

**Fixed modifications:** Carbamidomethyl (C) (apply to specified residues or termini only)

**Variable modifications:**

**N-term :** Dimethyl (N-term)

**S1 :** Phospho (ST), with neutral losses 0.0000(shown in table), 97.9769

**K2 :** Dimethyl (K)

**M13 :** Oxidation (M), with neutral losses 0.0000(shown in table), 63.9983

**Ions Score:** 40 **Expect:** 0.004

**Matched b ions:** b(3), b(4)-98, b(5), b(5)-98, b(6)-98, b(6), b(6)++, b(7)++, b(7)-98++, b(7)-98, b(8)-98++, b(8)++, b(9)-98++, b(9)++, b(10)++, b(10)-98++, b(11)++, b(12)-98++, b(12)++, b(13)++, b(13)-98++, b(14)++, b(14)-98++

**Matched y ions:** y(1), y(2), y(3), y(4)++, y(4), y(5)++, y(5), y(6)++, y(6), y(7), y(7)++, y(8)++, y(9)++, y(10)++, y(11)++, y(12)++, y(13)++, y(16)++, y(17)++

**Precursor origin neutral loss:** +

## Peptide No.874

**SLDSESEDEDDDYQQK**

**Confirmed sites:** @S:1,@S:4

**Ambiguous sites:**

MS/MS Fragmentation of **SLDSESEDEDDDYQQK**

Found in **HAP28\_MOUSE**, 28 kDa heat- and acid-stable phosphoprotein OS=Mus musculus GN=Pdap1 PE=1 SV=1

Match to Query 5361: 2232.753582 from(745.258470,3+)

Title: Elution from: 34.228 to 34.228 scan no 2571 cid35.00 polarity:+:MA10:m1s

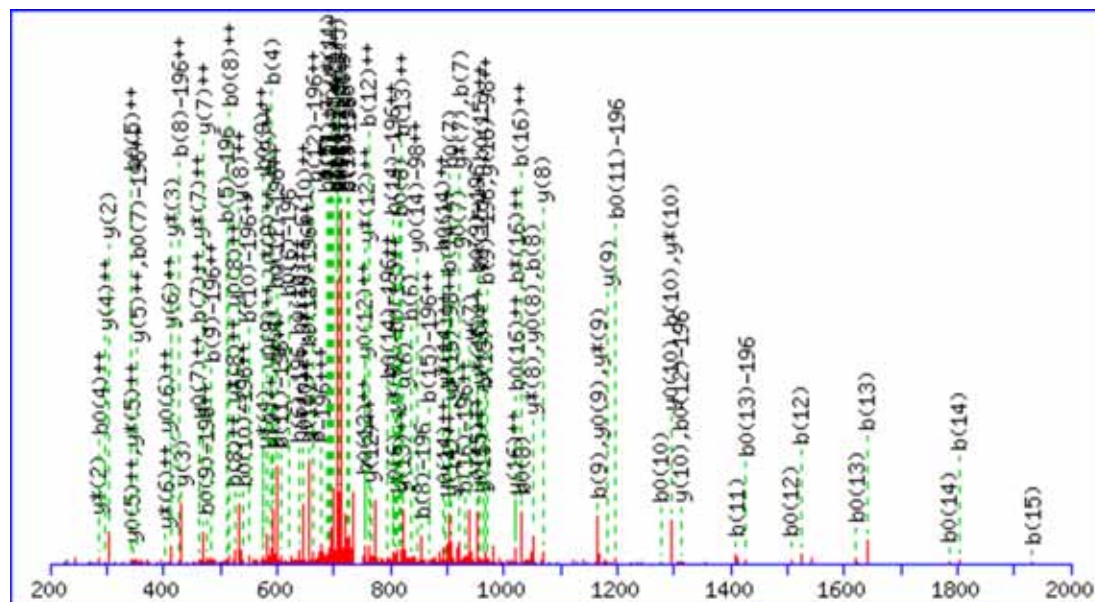

**Monoisotopic mass of neutral peptide Mr(calc):** 2232.7508

**Fixed modifications:** Carbamidomethyl (C) (apply to specified residues or termini only)

**Variable modifications:**

**N-term :** Dimethyl (N-term)

**S1 :** Phospho (ST), with neutral losses 0.0000(shown in table), 97.9769

**S4 :** Phospho (ST), with neutral losses 0.0000(shown in table), 97.9769

**K17 :** Dimethyl (K)

**Ions Score:** 56 **Expect:** 1.6e-005

**Matched b ions:** b(4), b(5), b(5)-98, b(5)-196, b(6)-196, b(6), b(7)-98++, b(7)-98, b(7), b(7)++, b(7)-196, b(8)-98, b(8), b(8)++, b(8)-98++, b(8)-196++, b(8)-196, b(9), b(9)-98++, b(9)-98, b(9)++, b(9)-196++, b(9)-196, b(10)-98++, b(10), b(10)-98, b(10)++, b(10)-196++, b(11), b(11)-98++, b(11)-98, b(11)-196++, b(11)++, b(12), b(12)-98, b(12)-98++, b(12)++, b(12)-196++, b(13), b(13)-98++, b(13)-98, b(13)-196++, b(13)++, b(14)++, b(14), b(14)-98++, b(14)-196++, b(15), b(15)-98++, b(15)++, b(15)-196++, b(16)++, b(16)-98++, b(16)-196++

**Matched y ions:** y(2), y(3), y(4), y(4)++, y(5), y(5)++, y(6)++, y(6), y(7), y(7)++, y(8)++, y(8), y(9)++, y(9), y(10)++, y(10), y(11)++, y(12)++, y(13)++, y(14)++, y(15)++, y(16)-98++, y(16)++

**Precursor origin neutral loss:** +

## Peptide No.875

**SLDSDESEDEDDDYQQK**

**Confirmed sites:** @S:1,@S:7

**Ambiguous sites:**

**MS/MS Fragmentation of SLDSDESEDEDDDYQQK**

Found in **HAP28\_MOUSE**, 28 kDa heat- and acid-stable phosphoprotein OS=Mus musculus GN=Pdap1 PE=1 SV=1

Match to Query 7426: 2232.750698 from(1117.382625,2+)

Title: Elution from: 34.445 to 34.445 scan no 2845 cid35.00 polarity:+:MA10:m1s



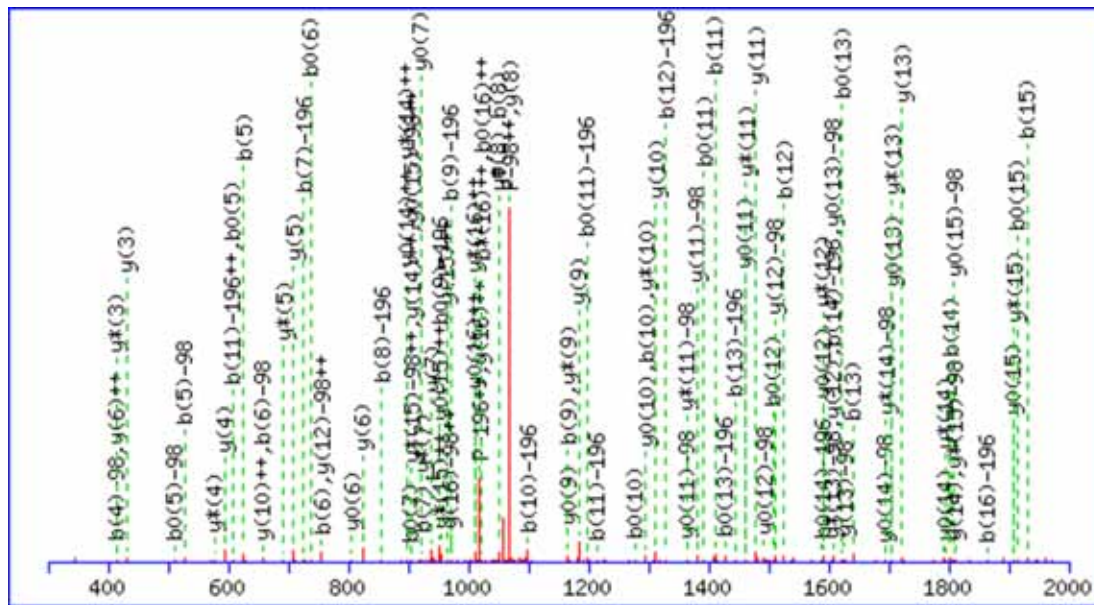

**Monoisotopic mass of neutral peptide Mr(calc):** 2232.7508

**Fixed modifications:** Carbamidomethyl (C) (apply to specified residues or termini only)

**Variable modifications:**

**N-term :** Dimethyl (N-term)

**S1 :** Phospho (ST), with neutral losses 0.0000(shown in table), 97.9769

**S7 :** Phospho (ST), with neutral losses 0.0000(shown in table), 97.9769

**K17 :** Dimethyl (K)

**Ions Score:** 84 **Expect:** 3.1e-008

**Matched b ions:** b(4)-98, b(5)-98, b(5), b(6)-98, b(6), b(7)-98, b(7)-98++, b(7)-196, b(7), b(8)-98, b(8)-196, b(8), b(9)-98, b(9), b(9)-196, b(10), b(10)-98, b(10)-196, b(11)-98, b(11), b(11)-98++, b(11)-196++, b(11)-196, b(12), b(12)-98, b(12)-196, b(13), b(13)-98, b(13)-196, b(14), b(14)-196, b(14)-98, b(15), b(15)-98, b(15)-98++, b(16)-98, b(16)-196, b(16)-98++

**Matched y ions:** y(3), y(4), y(5), y(6), y(6)++, y(7), y(8), y(9), y(10), y(10)++, y(11), y(11)-98, y(12)-98++, y(12), y(12)-98, y(13), y(13)-98, y(14)++, y(14), y(15)++, y(16)++, y(16)-98++

**Precursor origin neutral loss:** +

## Peptide No.876

**SLDSDESEDEDDDYQQK**

**Confirmed sites:** @S:4

**Ambiguous sites:**

MS/MS Fragmentation of **SLDSDESEDEDDDYQQK**

Found in **HAP28\_MOUSE**, 28 kDa heat- and acid-stable phosphoprotein OS=Mus musculus GN=Pdap1 PE=1 SV=1

Match to Query 6296: 2152.786234 from(1077.400393,2+)

Title: Elution from: 32.761 to 32.761 scan no 2683 cid35.00 polarity:+:MA10:m1s





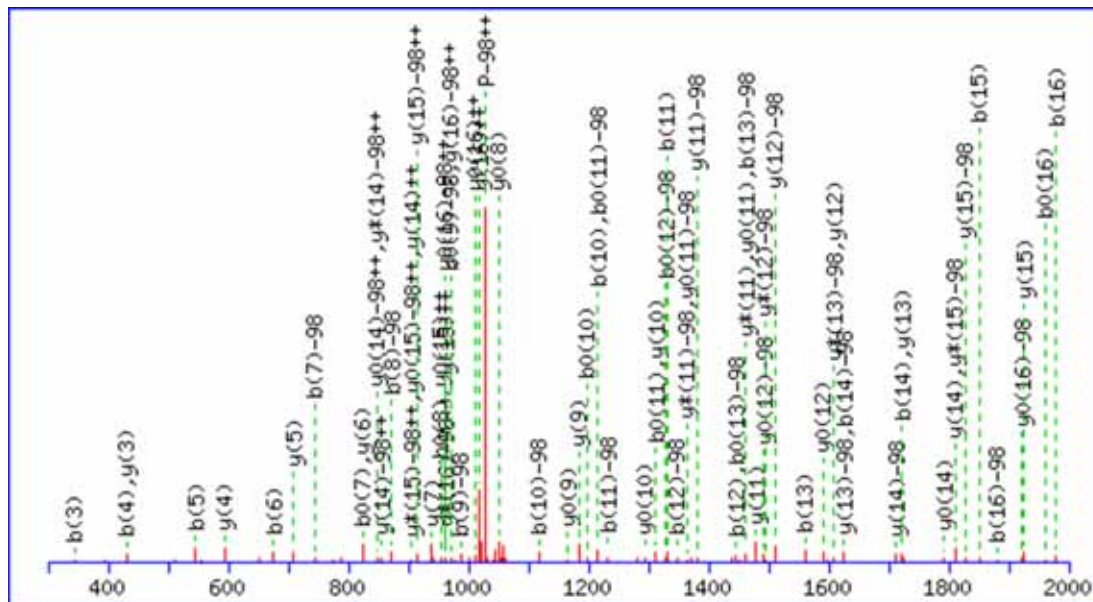

**Monoisotopic mass of neutral peptide Mr(calc):** 2152.7845

**Fixed modifications:** Carbamidomethyl (C) (apply to specified residues or termini only)

**Variable modifications:**

**N-term :** Dimethyl (N-term)

**S7 :** Phospho (ST), with neutral losses 97.9769(shown in table), 0.0000

**K17 :** Dimethyl (K)

**Ions Score:** 88 **Expect:** 2.2e-008

**Matched b ions:** b(3), b(4), b(5), b(6), b(7)-98, b(8)-98, b(9)-98, b(10), b(10)-98, b(11), b(11)-98, b(12)-98, b(12), b(13), b(13)-98, b(14), b(14)-98, b(15), b(16), b(16)-98

**Matched y ions:** y(3), y(4), y(5), y(6), y(7), y(9), y(10), y(11), y(11)-98, y(12)-98, y(12), y(13), y(13)-98, y(14)-98, y(14), y(14)-98++, y(14)++, y(15), y(15)-98++, y(15)-98, y(15)++, y(16)++, y(16)-98++

**Precursor origin neutral loss:** +

## Peptide No.879

**SLDSDESEDEDDDYQQK**

**Confirmed sites:** @S:1,@S:7

**Ambiguous sites:**

MS/MS Fragmentation of **SLDSDESEDEDDDYQQK**

Found in **HAP28\_MOUSE**, 28 kDa heat- and acid-stable phosphoprotein OS=Mus musculus GN=Pdap1 PE=1 SV=1

Match to Query 5417: 2244.815433 from(749.279087,3+)

Title: Elution from: 34.175 to 34.175 scan no 2564 cid35.00 polarity:+:MA10:m1s



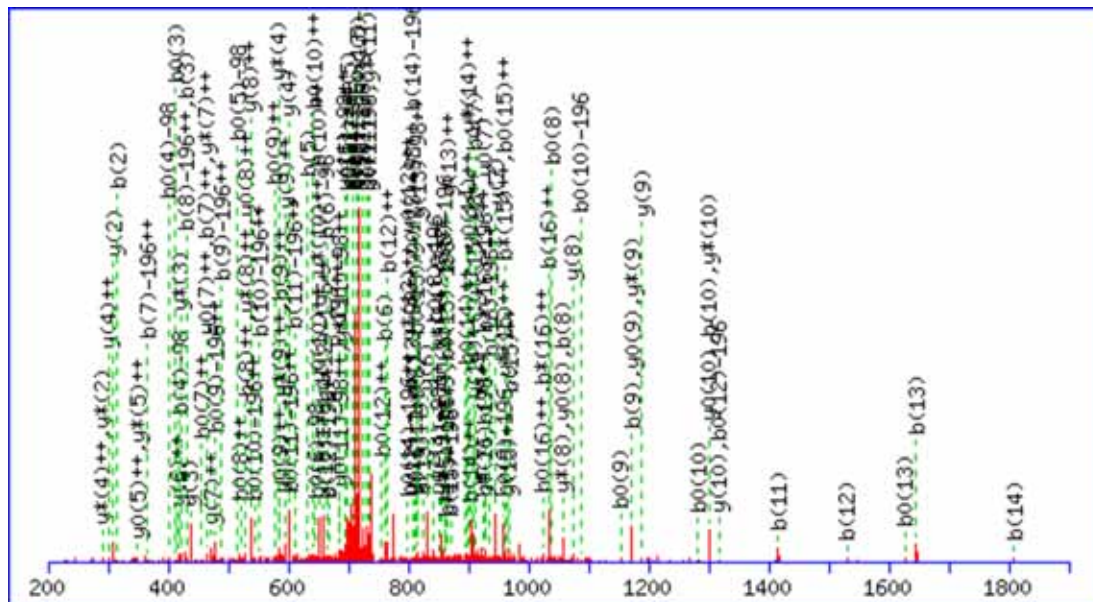

**Monoisotopic mass of neutral peptide Mr(calc):** 2244.8145

**Fixed modifications:** Carbamidomethyl (C) (apply to specified residues or termini only)

**Variable modifications:**

**N-term :** Dimethyl:2H(4)13C(2) (N-term)

**S1 :** Phospho (ST), with neutral losses 0.0000(shown in table), 97.9769

**S7 :** Phospho (ST), with neutral losses 0.0000(shown in table), 97.9769

**K17 :** Dimethyl:2H(4)13C(2) (K)

**Ions Score:** 34 **Expect:** 0.0058

**Matched b ions:** b(2), b(3), b(4)-98, b(5), b(6), b(6)-98, b(7)-98, b(7)++, b(7), b(7)-196, b(7)-196++, b(7)-98++, b(8)-98++, b(8)-98, b(8)++, b(8)-196++, b(8)-196, b(9), b(9)-98++, b(9)-98, b(9)++, b(9)-196++, b(10)-98++, b(10), b(10)-98, b(10)++, b(10)-196++, b(11), b(11)-98++, b(11)-98, b(11)-196++, b(11)++, b(12)-98++, b(12), b(12)++, b(12)-196++, b(13), b(13)-98++, b(13)-98, b(13)-196++, b(13)++, b(14), b(14)++, b(14)-98++, b(14)-196++, b(15)++, b(15)-98++, b(15)-196++, b(16)++, b(16)-98++, b(16)-196++

**Matched y ions:** y(2), y(3), y(4), y(4)++, y(5), y(6), y(6)++, y(7), y(7)++, y(8)++, y(8), y(9), y(9)++, y(10)++, y(10), y(11)-98++, y(12)++, y(13)-98++, y(13)++, y(14)++, y(15)++

**Precursor origin neutral loss:** +

## Peptide No.880

**SLDSDESEDEDDDYQQK**

**Confirmed sites:** @S:4,@S:7

**Ambiguous sites:**

**MS/MS Fragmentation of SLDSDESEDEDDDYQQK**

Found in **HAP28\_MOUSE**, 28 kDa heat- and acid-stable phosphoprotein OS=Mus musculus GN=Pdap1 PE=1 SV=1

Match to Query 5931: 2244.815554 from(1123.415053,2+)

Title: Elution from: 34.299 to 34.299 scan no 2690 cid35.00 polarity:+:MA10:m1s

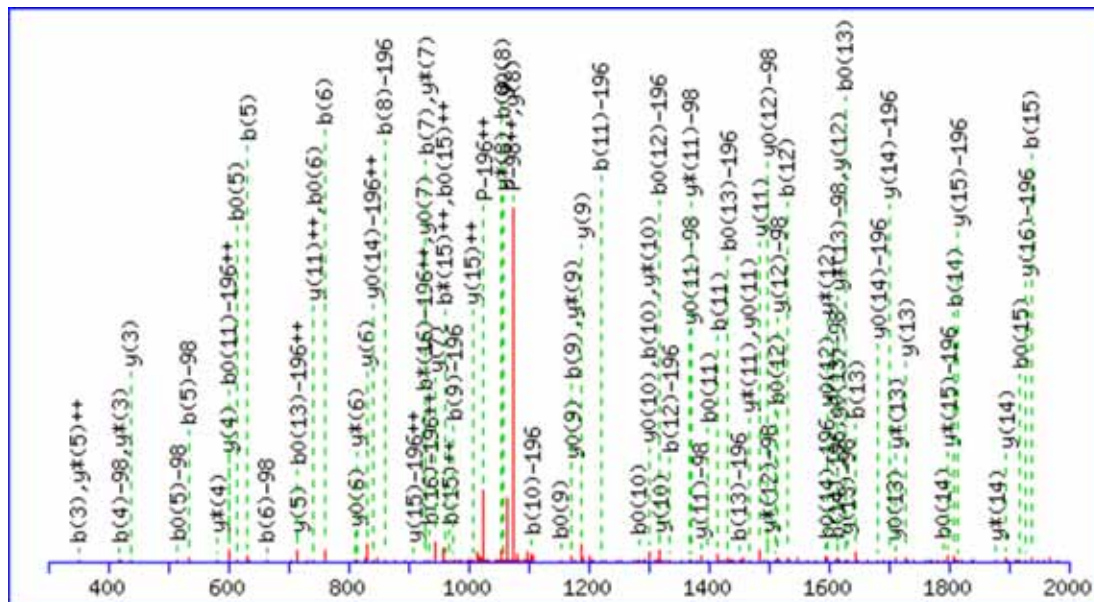

**Monoisotopic mass of neutral peptide Mr(calc):** 2244.8145

**Fixed modifications:** Carbamidomethyl (C) (apply to specified residues or termini only)

**Variable modifications:**

**N-term :** Dimethyl:2H(4)13C(2) (N-term)

**S4 :** Phospho (ST), with neutral losses 0.0000(shown in table), 97.9769

**S7 :** Phospho (ST), with neutral losses 0.0000(shown in table), 97.9769

**K17 :** Dimethyl:2H(4)13C(2) (K)

**Ions Score:** 79 **Expect:** 1.9e-007

**Matched b ions:** b(3), b(4)-98, b(5)-98, b(5), b(6), b(6)-98, b(7)-98, b(7), b(8)-98, b(8)-196, b(8), b(9)-98, b(9), b(9)-196, b(10)-98, b(10), b(10)-98++, b(10)-196, b(11)-98, b(11), b(11)-196, b(12), b(12)-98, b(12)-196, b(13), b(13)-98, b(13)-196, b(14)-98, b(14), b(14)-196, b(15), b(15)-98, b(15)++, b(16)-98, b(16)-196++

**Matched y ions:** y(3), y(4), y(5), y(6), y(7), y(8), y(9), y(10), y(11), y(11)-98, y(11)++, y(12), y(12)-98, y(13), y(13)-98, y(14)-98, y(14), y(14)-196, y(15)-196++, y(15)-196, y(15)-98, y(15)++, y(15)-98++, y(16)-196, y(16)-98++

**Precursor origin neutral loss:** +

## Peptide No.881

**SLMNSGIK**

**Confirmed sites:** @S:5

**Ambiguous sites:**

MS/MS Fragmentation of **SLMNSGIK**

Found in **FAT3\_MOUSE**, Protocadherin Fat 3 OS=Mus musculus GN=Fat3 PE=1 SV=2

Match to Query 775: 1000.465058 from(501.239805,2+)

Title: Elution from: 50.494 to 50.494 scan no 5016 cid35.00 polarity:+:MA10

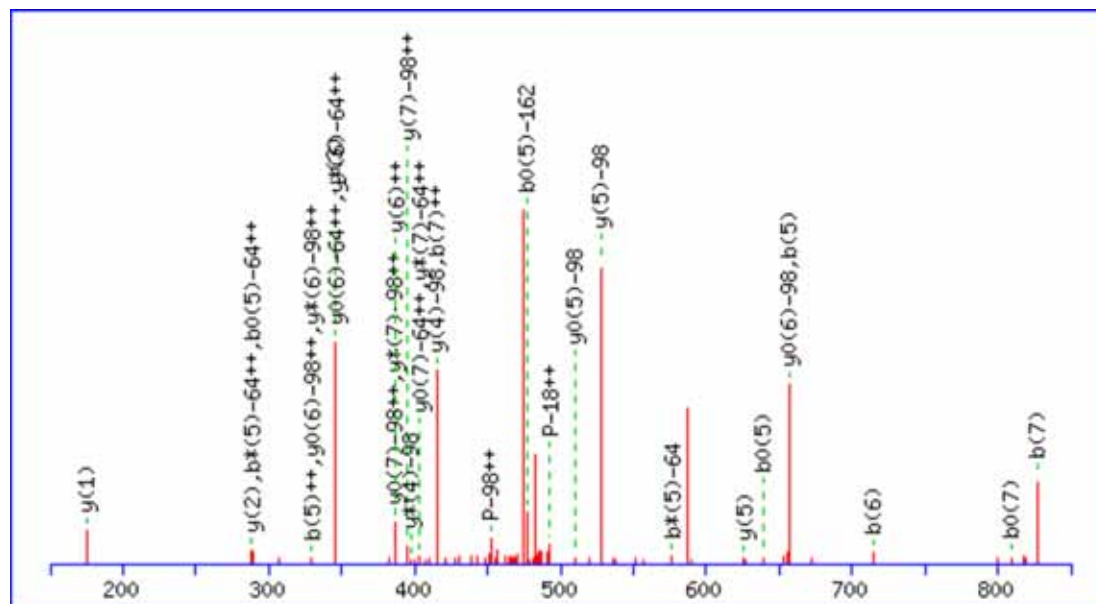

**Monoisotopic mass of neutral peptide Mr(calc):** 1000.4664

**Fixed modifications:** Carbamidomethyl (C) (apply to specified residues or termini only)

**Variable modifications:**

**N-term :** Dimethyl (N-term)

**M3 :** Oxidation (M), with neutral losses 0.0000(shown in table), 63.9983

**S5 :** Phospho (ST), with neutral losses 97.9769(shown in table), 0.0000

**K8 :** Dimethyl (K)

**Ions Score:** 30 **Expect:** 0.021

**Matched b ions:** b(5), b(5)++, b(6), b(7), b(7)++

**Matched y ions:** y(1), y(2), y(3), y(4)-98, y(5)-98, y(5), y(6)++, y(7)-98++

**Precursor origin neutral loss:**

## Peptide No.882

**SLMSSPEDLTK**

**Confirmed sites:** @S:4,@S:5

**Ambiguous sites:**

MS/MS Fragmentation of **SLMSSPEDLTK**

Found in **MAP1B\_MOUSE**, Microtubule-associated protein 1B OS=Mus musculus GN=Map1b PE=1 SV=1

Match to Query 2199: 1438.571940 from(720.293246,2+)

Title: Elution from: 40.629 to 40.629 scan no 3750 cid35.00 polarity:+:MA10





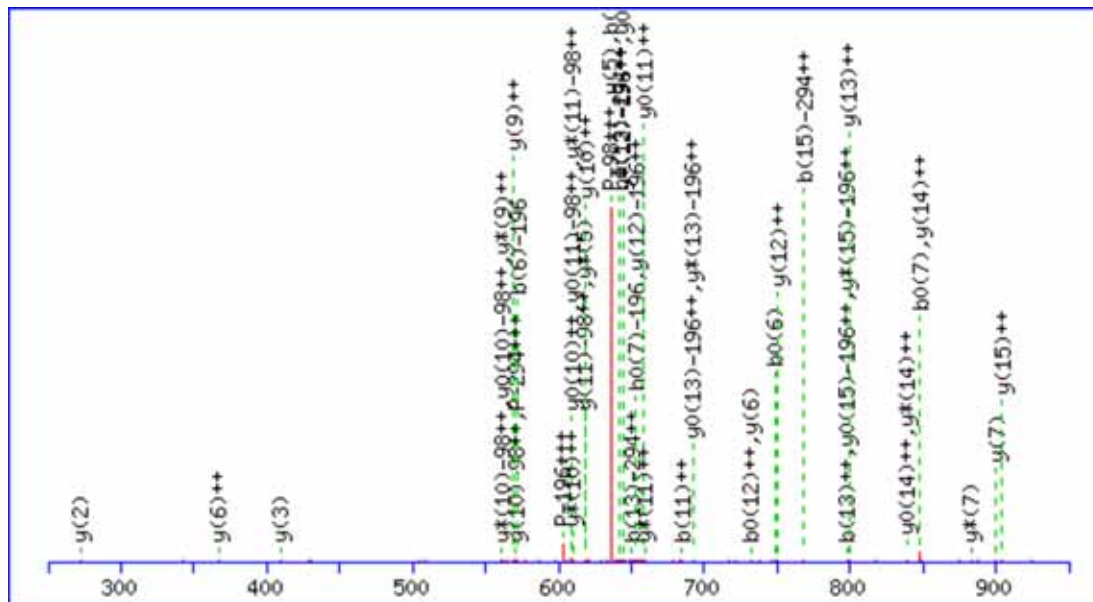

**Monoisotopic mass of neutral peptide Mr(calc):** 2001.8880

**Fixed modifications:** Carbamidomethyl (C) (apply to specified residues or termini only)

**Variable modifications:**

**N-term :** Dimethyl (N-term)

**S1 :** Phospho (ST), with neutral losses 0.0000(shown in table), 97.9769

**S5 :** Phospho (ST), with neutral losses 0.0000(shown in table), 97.9769

**S10 :** Phospho (ST), with neutral losses 0.0000(shown in table), 97.9769

**Ions Score:** 36 **Expect:** 0.014

**Matched b ions:** b(5)-98, b(6)-196, b(7)-98, b(9)-98++, b(10)++, b(10)-98++, b(11)-98++, b(11)++, b(11)-196++, b(12)-98++, b(12)-196++, b(13)-98++, b(13)++, b(13)-294++, b(14)-98++, b(14)-196++, b(15)-196++, b(15)-294++

**Matched y ions:** y(2), y(3), y(5), y(6)++, y(6), y(7), y(9)++, y(10)-98++, y(10)++, y(11)-98++, y(12)++, y(12)-196++, y(13)++, y(13)-98++, y(14)++, y(14)-98++, y(15)++

**Precursor origin neutral loss:** +

## Peptide No.884

**SLPPSPVTHSPLLHPR**

**Confirmed sites:** @S:1,@S:5,@T:8

**Ambiguous sites:**

MS/MS Fragmentation of **SLPPSPVTHSPLLHPR**

Found in **OBSCN\_MOUSE**, Obscurin OS=Mus musculus GN=Obscn PE=2 SV=2

Match to Query 5594: 2001.888660 from(668.303496,3+)

Title: Elution from: 42.935 to 42.935 scan no 4049 cid35.00 polarity:+:MA10

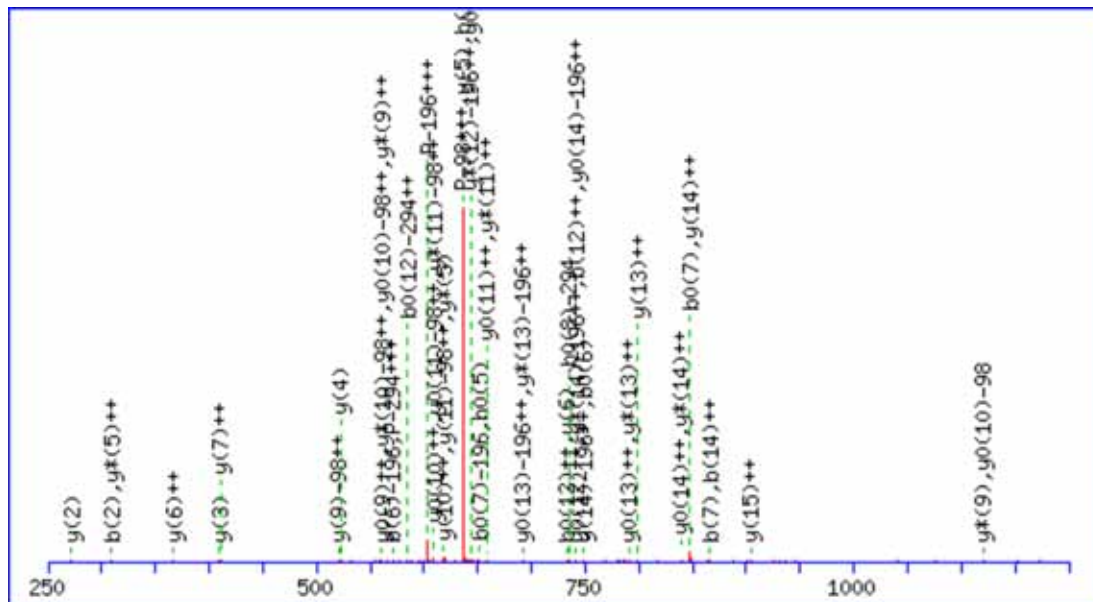

**Monoisotopic mass of neutral peptide Mr(calc):** 2001.8880

**Fixed modifications:** Carbamidomethyl (C) (apply to specified residues or termini only)

**Variable modifications:**

**N-term :** Dimethyl (N-term)

**S1 :** Phospho (ST), with neutral losses 97.9769(shown in table), 0.0000

**S5 :** Phospho (ST), with neutral losses 97.9769(shown in table), 0.0000

**T8 :** Phospho (ST), with neutral losses 97.9769(shown in table), 0.0000

**Ions Score:** 33 **Expect:** 0.028

**Matched b ions:** b(2), b(6)-196, b(7)-98, b(7), b(10)++, b(10)-98, b(10)-196, b(10)-98++, b(11)-98++, b(11)-196, b(12)-98++, b(12)++, b(12)-196++, b(13)-98++, b(14)-98++, b(14)-196++, b(14)++, b(15)-196++, b(15)-98++

**Matched y ions:** y(2), y(3), y(4), y(5), y(6)++, y(6), y(7)++, y(9)-98++, y(10)++, y(11)-98++, y(13)++, y(14)++, y(14)-196++, y(14)-98++, y(15)++

**Precursor origin neutral loss:** +

## Peptide No.885

**SLPPSPVTHSPLLHPR**

**Confirmed sites:** @S:1,@T:8,@S:10

**Ambiguous sites:**

**MS/MS Fragmentation of SLPPSPVTHSPLLHPR**

Found in **OBSCN\_MOUSE**, Obscurin OS=Mus musculus GN=Obscn PE=2 SV=2

Match to Query 4423: 2001.891495 from(668.304441,3+)

Title: Elution from: 43.553 to 43.553 scan no 3815 cid35.00 polarity:+:MA10:m1s

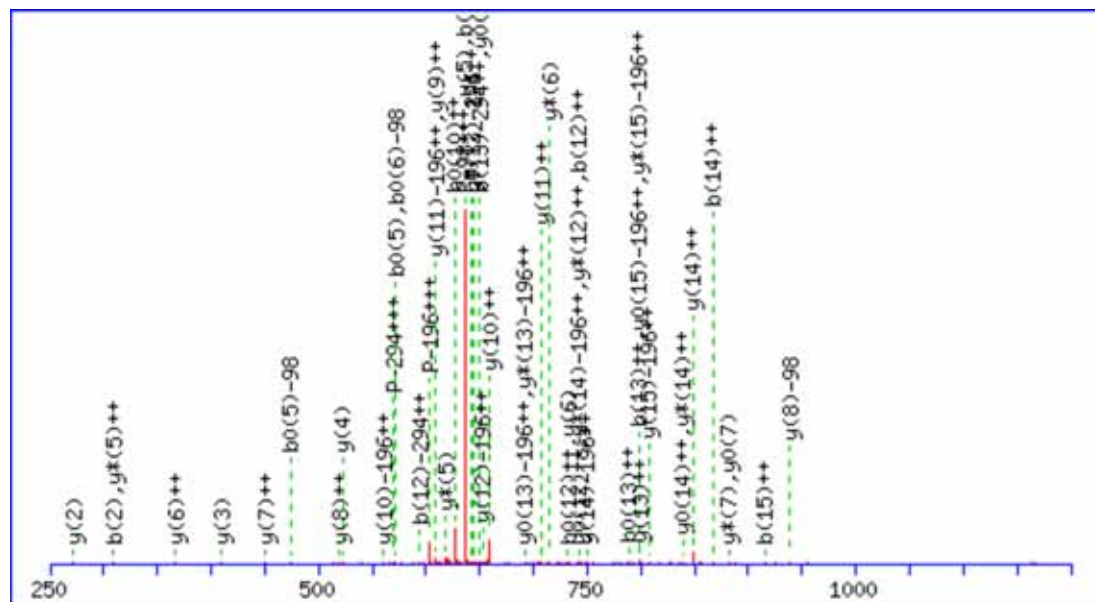

**Monoisotopic mass of neutral peptide Mr(calc):** 2001.8880

**Fixed modifications:** Carbamidomethyl (C) (apply to specified residues or termini only)

**Variable modifications:**

**N-term :** Dimethyl (N-term)

**S1 :** Phospho (ST), with neutral losses 0.0000(shown in table), 97.9769

**T8 :** Phospho (ST), with neutral losses 0.0000(shown in table), 97.9769

**S10 :** Phospho (ST), with neutral losses 0.0000(shown in table), 97.9769

**Ions Score:** 42 **Expect:** 0.0034

**Matched b ions:** b(2), b(10)++, b(10)-98++, b(11)-98++, b(12)++, b(12)-294++, b(12)-196++, b(12)-98++, b(13)++, b(13)-98++, b(13)-294++, b(13)-196++, b(14)-98++, b(14)++, b(15)++, b(15)-196++, b(15)-98++

**Matched y ions:** y(2), y(3), y(4), y(5), y(6)++, y(6), y(7)++, y(8)-98, y(8)++, y(9)++, y(9)-98++, y(10)++, y(10)-98++, y(10)-196++, y(11)++, y(11)-196++, y(11)-98++, y(12)-196++, y(13)++, y(14)++, y(14)-98++, y(14)-196++, y(15)-98++, y(15)-196++

**Precursor origin neutral loss:** +

## Peptide No.886

**SLPPSPVTHSPLLHPR**

**Confirmed sites:** @S:5,@S:10

**Ambiguous sites:**

**MS/MS Fragmentation of SLPPSPVTHSPLLHPR**

Found in **OBSCN\_MOUSE**, Obscurin OS=Mus musculus GN=Obscn PE=2 SV=2

Match to Query 5221: 1921.922703 from(641.648177,3+)

Title: Elution from: 43.078 to 43.078 scan no 4068 cid35.00 polarity:+:MA10:m1s

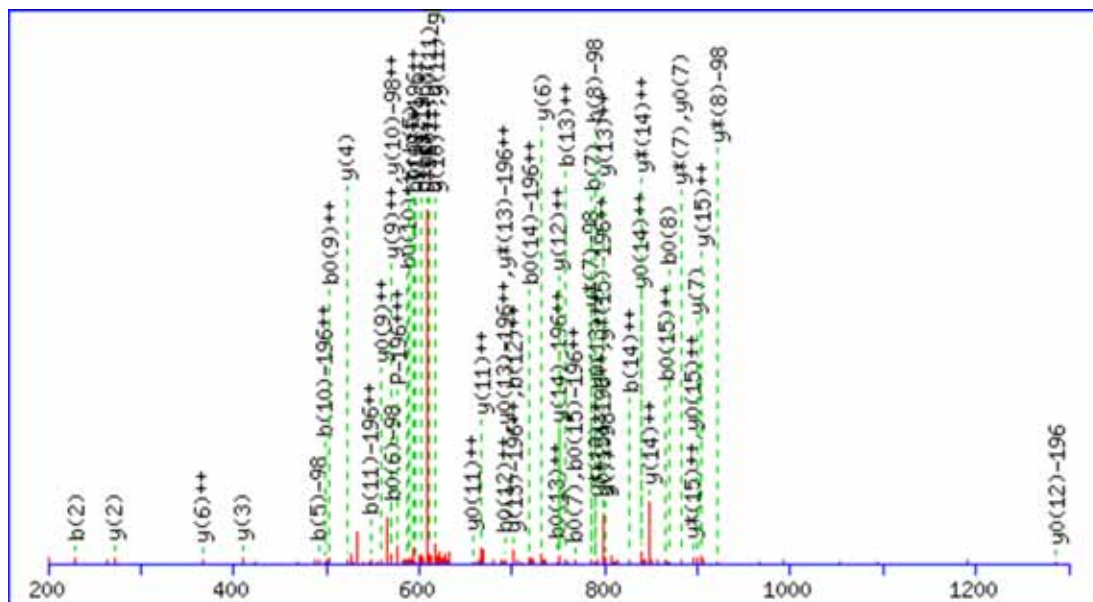

**Monoisotopic mass of neutral peptide Mr(calc):** 1921.9216

**Fixed modifications:** Carbamidomethyl (C) (apply to specified residues or termini only)

**Variable modifications:**

**N-term :** Dimethyl (N-term)

**S5 :** Phospho (ST), with neutral losses 0.0000(shown in table), 97.9769

**S10 :** Phospho (ST), with neutral losses 0.0000(shown in table), 97.9769

**Ions Score:** 33 **Expect:** 0.028

**Matched b ions:** b(2), b(5)-98, b(5), b(7), b(8)-98, b(10)-98, b(10)-196++, b(10)-98++, b(10)++, b(11)-98, b(11)-196++, b(11)-98++, b(12)++, b(12)-196++, b(13)++, b(14)++, b(15)-98++

**Matched y ions:** y(2), y(3), y(4), y(6)++, y(6), y(7)-98, y(7), y(9)++, y(10)++, y(10)-98++, y(11)++, y(11)-98++, y(12)-98++, y(12)++, y(13)++, y(13)-196++, y(13)-98++, y(14)-98++, y(14)++, y(14)-196++, y(15)++, y(15)-98++

**Precursor origin neutral loss:** +

## Peptide No.887

**SLPTTVPESPNYR**

**Confirmed sites:** @S:1,@S:9

**Ambiguous sites:**

**MS/MS Fragmentation of SLPTTVPESPNYR**

Found in **LARP1\_MOUSE**, La-related protein 1 OS=Mus musculus GN=Larp1 PE=1 SV=2

Match to Query 2621: 1647.694788 from(824.854670,2+)

Title: Elution from: 45.480 to 45.480 scan no 4160 cid35.00 polarity:+:MA10





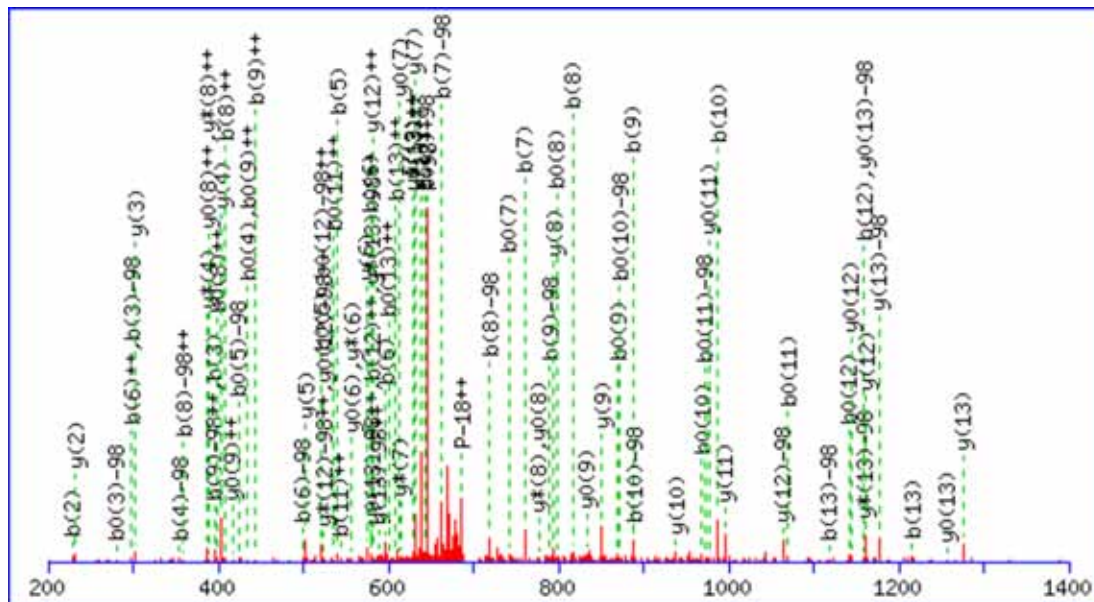

**Monoisotopic mass of neutral peptide Mr(calc):** 1389.6541

**Fixed modifications:** Carbamidomethyl (C) (apply to specified residues or termini only)

**Variable modifications:**

**N-term :** Dimethyl (N-term)

**S3 :** Phospho (ST), with neutral losses 97.9769(shown in table), 0.0000

**K14 :** Dimethyl (K)

**Ions Score:** 77 **Expect:** 7.6e-007

**Matched b ions:** b(2), b(3), b(3)-98, b(4)-98, b(5), b(6)-98, b(6), b(6)++, b(7), b(7)-98, b(8)++, b(8)-98, b(8), b(8)-98++, b(9)-98++, b(9), b(9)++, b(9)-98, b(10), b(10)-98, b(11)++, b(12), b(12)++, b(13), b(13)++, b(13)-98

**Matched y ions:** y(2), y(3), y(4), y(5), y(6), y(7), y(8), y(9), y(10), y(11), y(12)-98, y(12), y(12)++, y(13), y(13)++, y(13)-98, y(13)-98++

**Precursor origin neutral loss:** +

## Peptide No.889

**SLSGSGYGAVTAGK**

**Confirmed sites:** @S:3

**Ambiguous sites:**

**MS/MS Fragmentation of SLSGSGYGAVTAGK**

Found in **SMTL2\_MOUSE**, Smoothelin-like protein 2 OS=Mus musculus GN=Smtnl2 PE=1 SV=1

Match to Query 1596: 1401.718638 from(701.866595,2+)

Title: Elution from: 37.106 to 37.106 scan no 3049 cid35.00 polarity:+:MA10

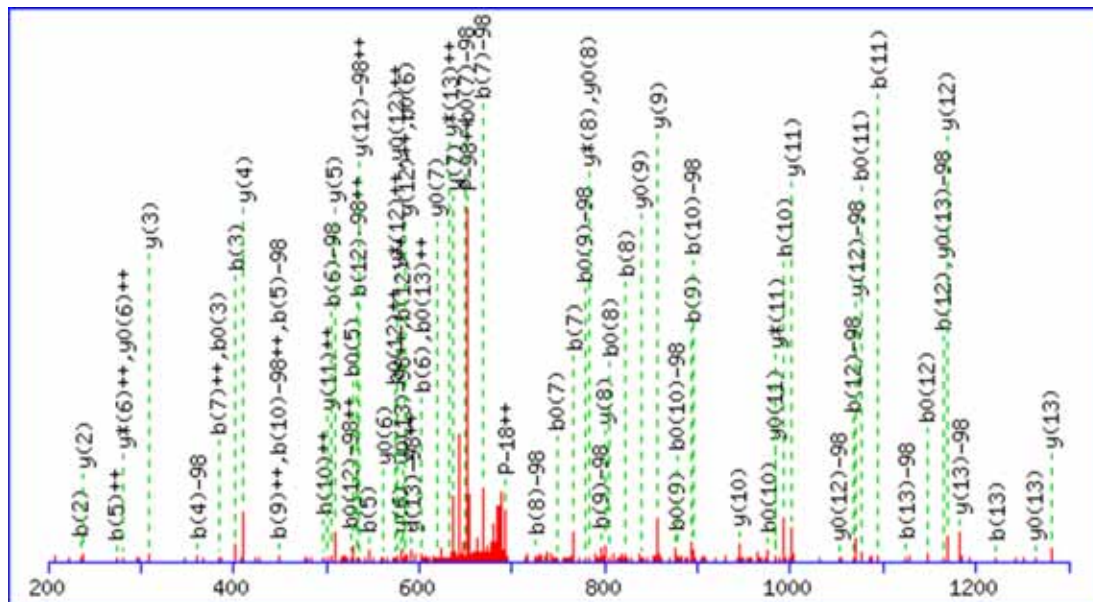

**Monoisotopic mass of neutral peptide Mr(calc):** 1401.7177

**Fixed modifications:** Carbamidomethyl (C) (apply to specified residues or termini only)

**Variable modifications:**

**N-term :** Dimethyl:2H(4)13C(2) (N-term)

**S3 :** Phospho (ST), with neutral losses 0.0000(shown in table), 97.9769

**K14 :** Dimethyl:2H(4)13C(2) (K)

**Ions Score:** 83 **Expect:** 2.4e-007

**Matched b ions:** b(2), b(3), b(4)-98, b(5)-98, b(5), b(5)++, b(6)-98, b(6), b(7), b(7)-98, b(7)++, b(8), b(8)-98, b(9)++, b(9), b(9)-98, b(10), b(10)-98++, b(10)-98, b(10)++, b(11), b(12)-98, b(12), b(12)-98++, b(12)++, b(13), b(13)-98

**Matched y ions:** y(2), y(3), y(4), y(5), y(6), y(7), y(8), y(9), y(10), y(11), y(11)++, y(12)-98, y(12), y(12)++, y(12)-98++, y(13)-98, y(13), y(13)-98++

**Precursor origin neutral loss:** +

## Peptide No.890

**SLSTELFK**

**Confirmed sites:** @S:3

**Ambiguous sites:**

**MS/MS Fragmentation of SLSTELFK**

Found in **MYH1\_MOUSE**, Myosin-1 OS=Mus musculus GN=Myh1 PE=1 SV=1

Match to Query 622: 1059.525500 from(530.770026,2+)

Title: Elution from: 51.381 to 51.381 scan no 4886 cid35.00 polarity:+:MA10

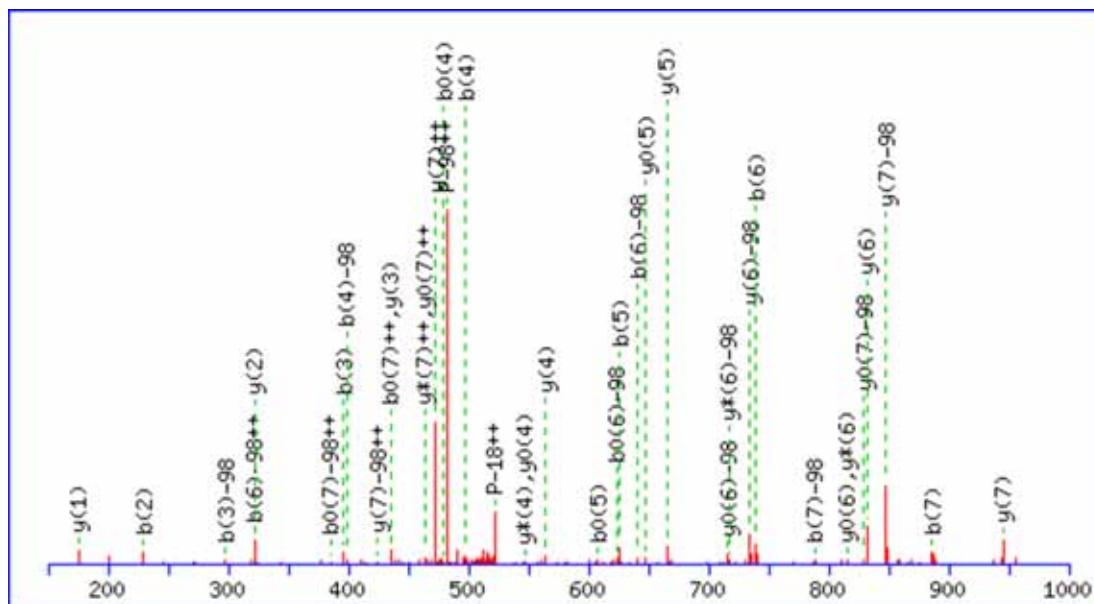

**Monoisotopic mass of neutral peptide Mr(calc):** 1059.5253

**Fixed modifications:** Carbamidomethyl (C) (apply to specified residues or termini only)

**Variable modifications:**

**N-term :** Dimethyl (N-term)

**S3 :** Phospho (ST), with neutral losses 0.0000(shown in table), 97.9769

**K8 :** Dimethyl (K)

**Ions Score:** 49 **Expect:** 0.00028

**Matched b ions:** b(2), b(3)-98, b(3), b(4)-98, b(4), b(5), b(6)-98++, b(6), b(6)-98, b(7), b(7)-98

**Matched y ions:** y(1), y(2), y(3), y(4), y(5), y(6)-98, y(6), y(7)++, y(7)-98, y(7), y(7)-98++

**Precursor origin neutral loss:** +

## Peptide No.891

**SLSYSPVER**

**Confirmed sites:** @S:3,@S:5

**Ambiguous sites:**

**MS/MS Fragmentation of SLSYSPVER**

Found in **SRRM2\_MOUSE**, Serine/arginine repetitive matrix protein 2 OS=Mus musculus GN=Srrm2  
PE=1 SV=2

Match to Query 1296: 1224.483814 from(613.249183,2+)

Title: Elution from: 39.105 to 39.105 scan no 3546 cid35.00 polarity:+:MA10



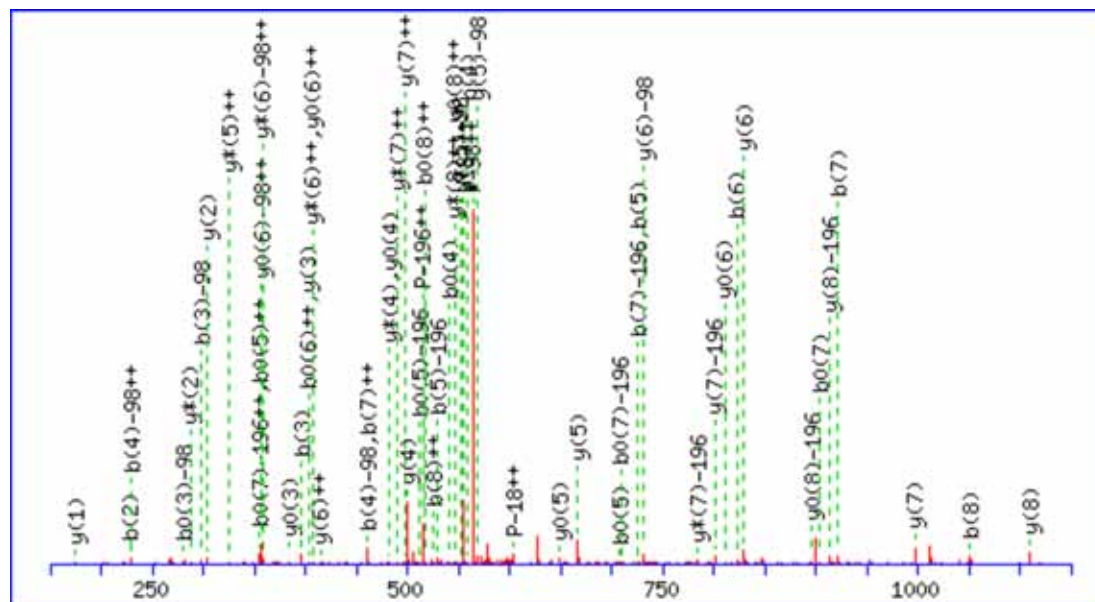

**Monoisotopic mass of neutral peptide Mr(calc):** 1224.4828

**Fixed modifications:** Carbamidomethyl (C) (apply to specified residues or termini only)

**Variable modifications:**

**N-term :** Dimethyl (N-term)

**S3 :** Phospho (ST), with neutral losses 97.9769(shown in table), 0.0000

**S5 :** Phospho (ST), with neutral losses 97.9769(shown in table), 0.0000

**Ions Score:** 28 **Expect:** 0.022

**Matched b ions:** b(2), b(3), b(3)-98, b(4)-98, b(4)-98++, b(4), b(5)-98, b(5), b(5)-196, b(6)-98, b(6), b(7)++, b(7), b(7)-98, b(7)-196, b(8), b(8)-98, b(8)++

**Matched y ions:** y(1), y(2), y(3), y(4), y(5), y(5)-98, y(6)-98, y(6), y(6)++, y(7)-98, y(7)-196, y(7), y(7)++, y(8)-98, y(8), y(8)++, y(8)-196, y(8)-98++

**Precursor origin neutral loss:** +

## Peptide No.892

**SLSYSPVER**

**Confirmed sites:** @S:3,@S:5

**Ambiguous sites:**

**MS/MS Fragmentation of SLSYSPVER**

Found in **SRRM2\_MOUSE**, Serine/arginine repetitive matrix protein 2 OS=Mus musculus GN=Srrm2 PE=1 SV=2

Match to Query 1052: 1230.515064 from(616.264808,2+)

Title: Elution from: 38.931 to 38.931 scan no 3280 cid35.00 polarity:+:MA10

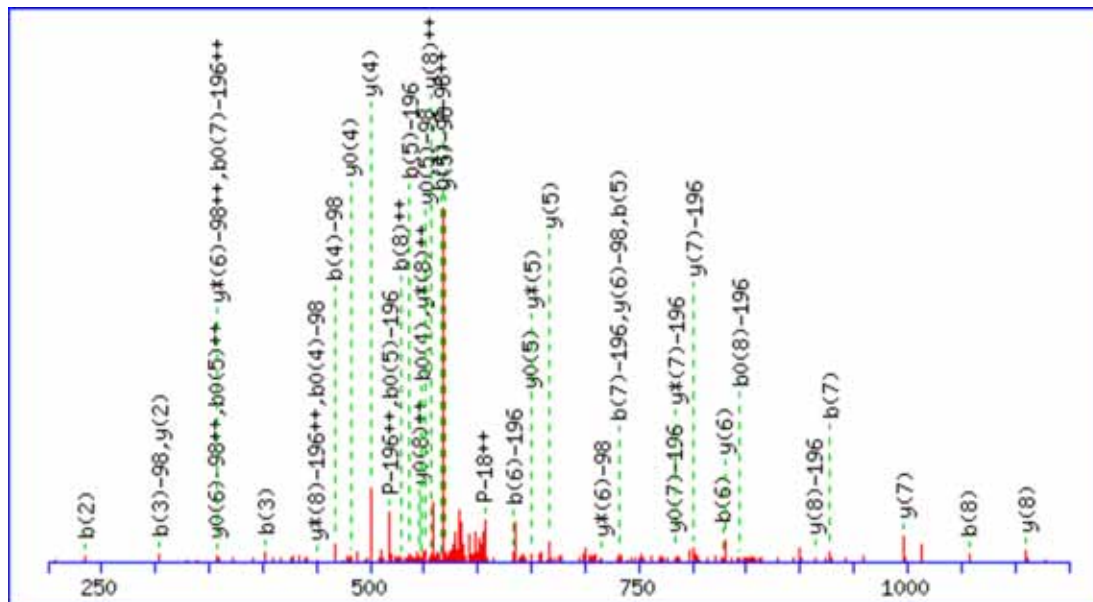

**Monoisotopic mass of neutral peptide Mr(calc):** 1230.5147

**Fixed modifications:** Carbamidomethyl (C) (apply to specified residues or termini only)

**Variable modifications:**

**N-term :** Dimethyl:2H(4)13C(2) (N-term)

**S3 :** Phospho (ST), with neutral losses 0.0000(shown in table), 97.9769

**S5 :** Phospho (ST), with neutral losses 0.0000(shown in table), 97.9769

**Ions Score:** 32 **Expect:** 0.01

**Matched b ions:** b(2), b(3)-98, b(3), b(4)-98, b(4), b(5)-98, b(5), b(5)-196, b(6)-196, b(6)-98, b(6), b(7)-98, b(7), b(7)-196, b(8), b(8)-98, b(8)-98++, b(8)++

**Matched y ions:** y(2), y(4), y(5), y(5)-98, y(6), y(6)-98, y(7)-196, y(7), y(7)-98, y(7)-98++, y(8)-98, y(8), y(8)-196, y(8)++

**Precursor origin neutral loss:** +

## Peptide No.893

**SLSYSPVER**

**Confirmed sites:** @S:3,@Y:4

**Ambiguous sites:**

**MS/MS Fragmentation of SLSYSPVER**

Found in **SRRM2\_MOUSE**, Serine/arginine repetitive matrix protein 2 OS=Mus musculus GN=Srrm2 PE=1 SV=2

**Match to Query 1015:** 1230.514966 from(616.264759,2+)

**Title:** Elution from: 38.916 to 38.916 scan no 3324 cid35.00 polarity:+:MA10



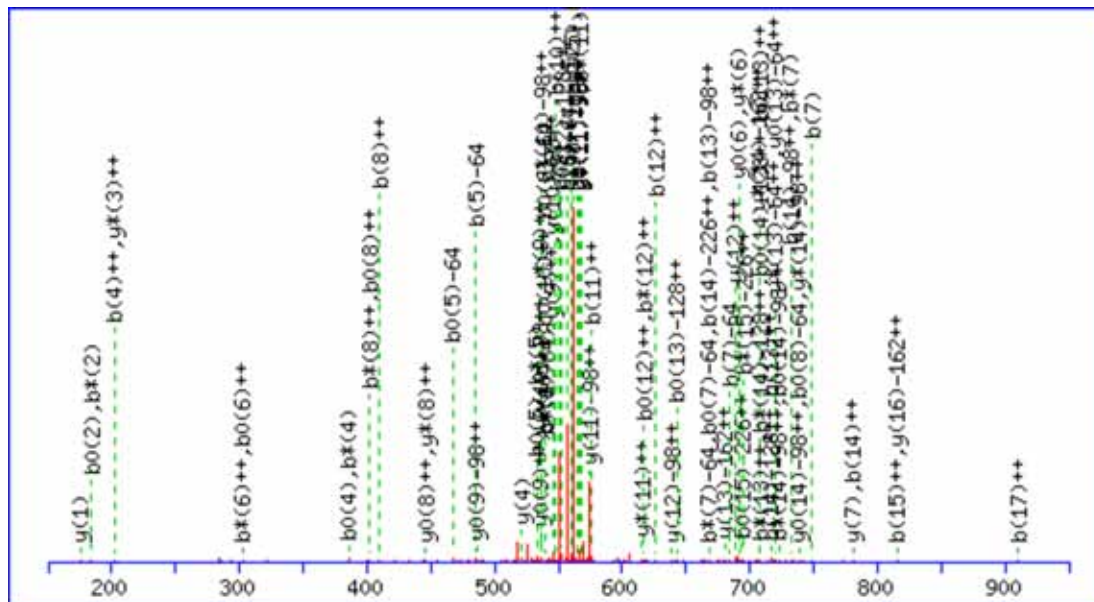

**Monoisotopic mass of neutral peptide Mr(calc):** 2338.9891

**Fixed modifications:** Carbamidomethyl (C) (apply to specified residues or termini only)

**Variable modifications:**

**M5 :** Oxidation (M), with neutral losses 0.0000(shown in table), 63.9983

**M9 :** Oxidation (M), with neutral losses 0.0000(shown in table), 63.9983

**T13 :** Phospho (ST), with neutral losses 0.0000(shown in table), 97.9769

**Ions Score:** 44 **Expect:** 0.002

**Matched b ions:** b(2), b(4)++, b(5), b(7), b(8)++, b(10)++, b(11)++, b(12)++, b(13)++, b(13)-98++, b(14)++, b(14)-98++, b(15)++, b(17)++

**Matched y ions:** y(1), y(4), y(7), y(9)++, y(10)-98++, y(11)-98++, y(12)++, y(12)-98++

**Precursor origin neutral loss:** +

## Peptide No.895

**SNSSEASSGDFLDLK**

**Confirmed sites:** @S:4

**Ambiguous sites:**

MS/MS Fragmentation of **SNSSEASSGDFLDLK**

Found in **HN1\_MOUSE**, Hematological and neurological expressed 1 protein OS=Mus musculus  
GN=Hn1 PE=1 SV=3

Match to Query 3630: 1691.729966 from(846.872259,2+)

Title: Elution from: 52.066 to 52.066 scan no 5153 cid35.00 polarity:+:MA10



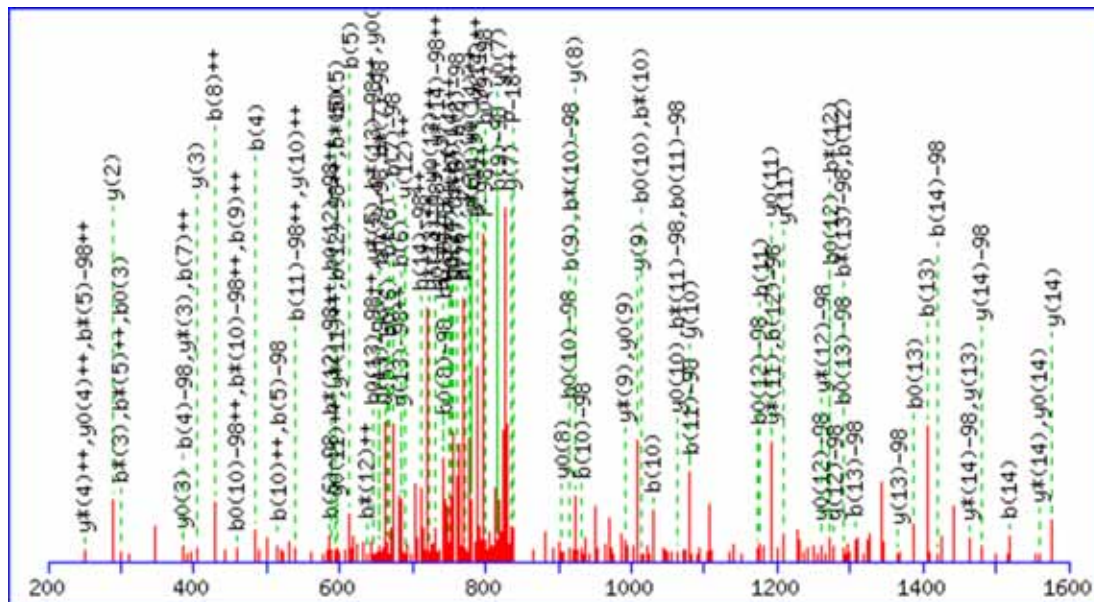

**Monoisotopic mass of neutral peptide Mr(calc):** 1691.7291

**Fixed modifications:** Carbamidomethyl (C) (apply to specified residues or termini only)

**Variable modifications:**

**N-term :** Dimethyl (N-term)

**S4 :** Phospho (ST), with neutral losses 0.0000(shown in table), 97.9769

**K15 :** Dimethyl (K)

**Ions Score:** 34 **Expect:** 0.013

**Matched b ions:** b(4)-98, b(4), b(5), b(5)-98, b(6)-98, b(6), b(7)++, b(7)-98, b(7), b(8)++, b(8)-98, b(9)++, b(9), b(9)-98, b(10), b(10)++, b(10)-98, b(11)-98++, b(11)-98, b(11), b(12)-98, b(12)-98++, b(12)++, b(12), b(13), b(13)-98, b(13)-98++, b(14), b(14)-98++, b(14)-98

**Matched y ions:** y(2), y(3), y(5), y(6), y(7), y(8), y(9), y(10), y(10)++, y(11), y(12)++, y(12)-98, y(13), y(13)-98++, y(13)-98, y(14), y(14)-98, y(14)++

**Precursor origin neutral loss:** +

## Peptide No.896

**SNSVDTGPSSSLSTPTEPLSPTSSLGEERN**

**Confirmed sites:**

**Ambiguous sites:** @S:1orS:3

**MS/MS Fragmentation of SNSVDTGPSSSLSTPTEPLSPTSSLGEERN**

Found in **GYS1\_MOUSE**, Glycogen [starch] synthase, muscle OS=Mus musculus GN=Gys1 PE=1 SV=2

Match to Query 6983: 3140.405130 from(1047.808986,3+)

Title: Elution from: 49.700 to 49.700 scan no 4558 cid35.00 polarity:+:MA10:m1s

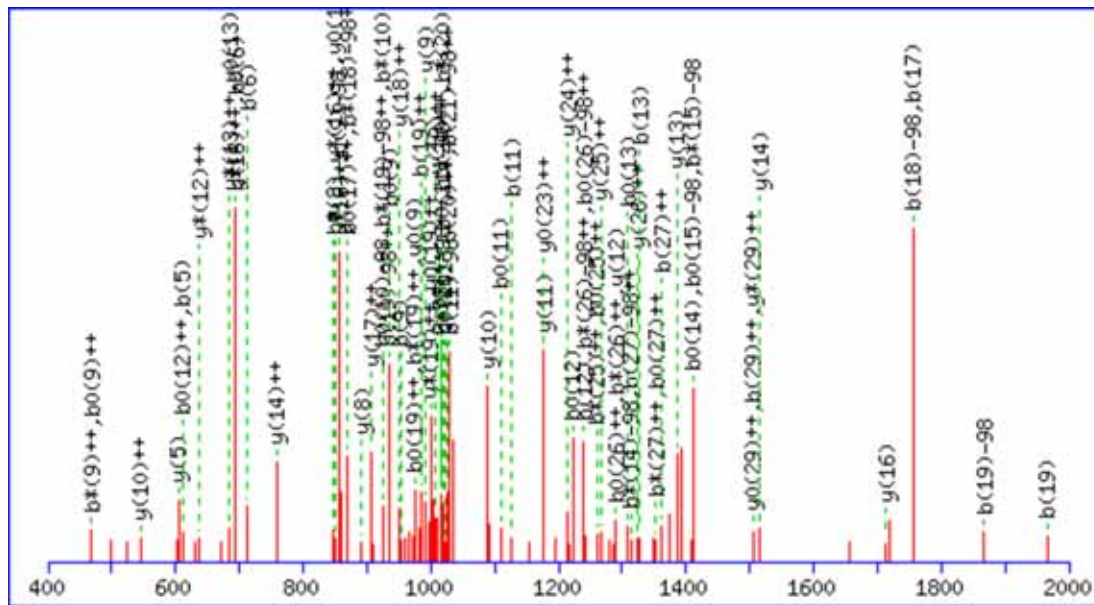

**Monoisotopic mass of neutral peptide Mr(calc):** 3140.4034

**Fixed modifications:** Carbamidomethyl (C) (apply to specified residues or termini only)

**Variable modifications:**

**N-term :** Dimethyl (N-term)

**S3 :** Phospho (ST), with neutral losses 0.0000(shown in table), 97.9769

**Ions Score:** 44 **Expect:** 0.004

**Matched b ions:** b(5), b(6), b(9)-98, b(9), b(11)-98, b(11), b(12), b(13), b(17), b(18)-98, b(19), b(19)-98, b(19)++, b(19)-98++, b(20)++, b(21)-98++, b(27)++, b(27)-98++, b(29)++

**Matched y ions:** y(5), y(8), y(9), y(10), y(10)++, y(11), y(12), y(13)++, y(13), y(14), y(14)++, y(16)++, y(16), y(17)++, y(18)++, y(19)++, y(24)++, y(25)++, y(26)++

**Precursor origin neutral loss:**

## Peptide No.897

**SNSVDTGPSSSLSTPTEPLSPTSSLGEERN**

**Confirmed sites:** @T:14

**Ambiguous sites:**

MS/MS Fragmentation of **SNSVDTGPSSSLSTPTEPLSPTSSLGEERN**

Found in **GYS1\_MOUSE**, Glycogen [starch] synthase, muscle OS=Mus musculus GN=Gys1 PE=1 SV=2

Match to Query 7463: 3140.405643 from(1047.809157,3+)

Title: Elution from: 49.619 to 49.619 scan no 4640 cid35.00 polarity:+:MA10:m1s

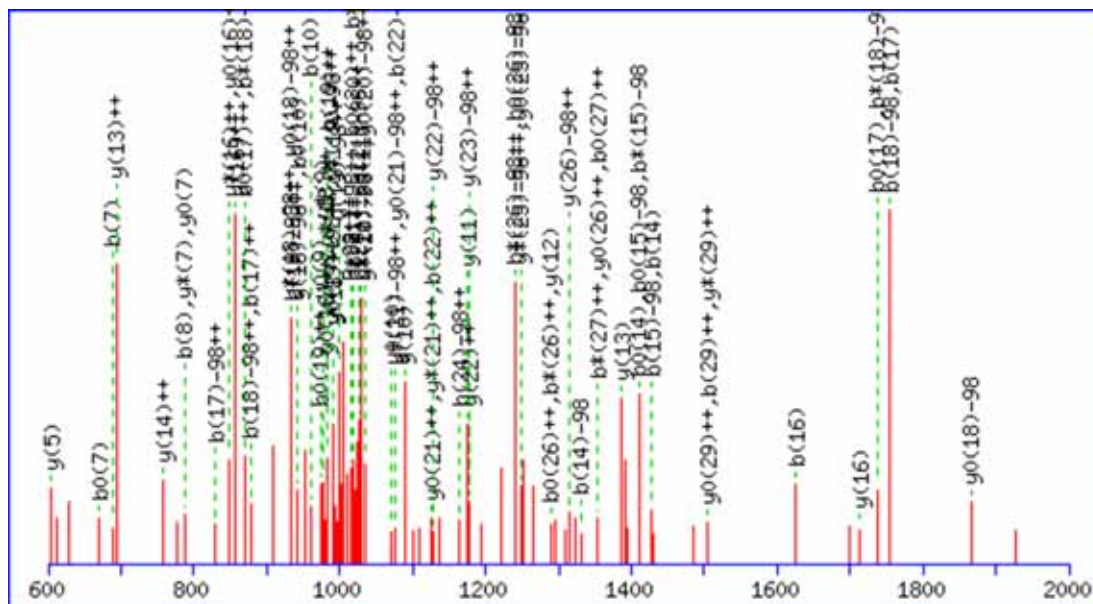

**Monoisotopic mass of neutral peptide Mr(calc):** 3140.4034

**Fixed modifications:** Carbamidomethyl (C) (apply to specified residues or termini only)

**Variable modifications:**

**N-term :** Dimethyl (N-term)

**T14 :** Phospho (ST), with neutral losses 97.9769(shown in table), 0.0000

**Ions Score:** 35 **Expect:** 0.033

**Matched b ions:** b(7), b(8), b(10), b(13), b(14), b(14)-98, b(15)-98, b(16), b(17), b(17)++, b(17)-98++, b(18)-98, b(18)-98++, b(19)-98++, b(19)++, b(20)++, b(21)-98++, b(22)++, b(22)-98++, b(24)-98++, b(29)++

**Matched y ions:** y(5), y(10), y(11), y(12), y(13)++, y(13), y(14)++, y(16)++, y(16), y(18)-98++, y(18)++, y(19)-98++, y(22)++, y(22)-98++, y(23)-98++, y(26)-98++

**Precursor origin neutral loss:**

## Peptide No.898

**SNSVDTGPSSSLSTPTEPLSPTSSLGEERN**

**Confirmed sites:** @T:6

**Ambiguous sites:**

**MS/MS Fragmentation of SNSVDTGPSSSLSTPTEPLSPTSSLGEERN**

Found in **GYS1\_MOUSE**, Glycogen [starch] synthase, muscle OS=Mus musculus GN=Gys1 PE=1 SV=2

Match to Query 7611: 3140.405883 from(1047.809237,3+)

Title: Elution from: 49.535 to 49.535 scan no 4695 cid35.00 polarity:+:MA10:m1s





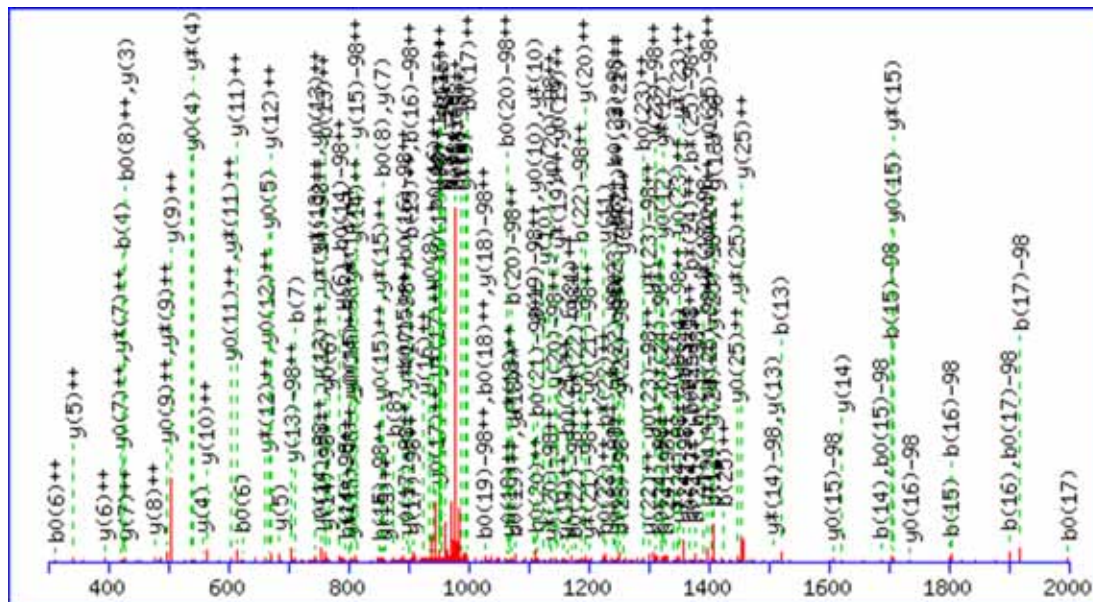

**Monoisotopic mass of neutral peptide Mr(calc):** 3026.2107

**Fixed modifications:** Carbamidomethyl (C) (apply to specified residues or termini only)

**Variable modifications:**

**N-term :** Dimethyl (N-term)

**Y9 :** Phospho (Y)

**S14 :** Phospho (ST), with neutral losses 97.9769(shown in table), 0.0000

**K24 :** Dimethyl (K)

**Ions Score:** 82 **Expect:** 3.4e-007

**Matched b ions:** b(4), b(7), b(8), b(12), b(13), b(13)++, b(14), b(14)-98++, b(15), b(15)-98, b(15)-98++, b(15)++, b(16)-98, b(16), b(16)-98++, b(16)++, b(17)-98, b(17)-98++, b(18)-98++, b(20)-98++, b(21)++, b(22)-98++, b(23)-98++, b(24)++, b(24)-98++, b(25)-98++, b(25)++

**Matched y ions:** y(3), y(4), y(5)++, y(5), y(6)++, y(6), y(7)++, y(7), y(8)++, y(8), y(9)++, y(10)++, y(10), y(11)++, y(11), y(12)++, y(12), y(13)-98++, y(13)++, y(13), y(13)-98, y(14)-98++, y(14)++, y(14), y(15)-98++, y(15)++, y(16)++, y(17)-98++, y(17)++, y(18)++, y(18)-98++, y(19)-98++, y(19)++, y(20)-98++, y(20)++, y(21)++, y(22)-98++, y(22)++, y(23)++, y(23)-98++, y(24)++, y(24)-98++, y(25)-98++, y(25)++

**Precursor origin neutral loss:** +

## Peptide No.900

**SPPDSEAYYGETDSDVDGPATQEKPR**

**Confirmed sites:** @T:12,@S:14

**Ambiguous sites:**

MS/MS Fragmentation of **SPPDSEAYYGETDSDVDGPATQEKPR**

Found in **SYP2L\_MOUSE**, Synaptopodin 2-like protein OS=Mus musculus GN=Synpo2l PE=2 SV=1

Match to Query 6937: 3026.210922 from(1009.744250,3+)

Title: Elution from: 38.881 to 38.881 scan no 3211 cid35.00 polarity:+:MA10:m1s

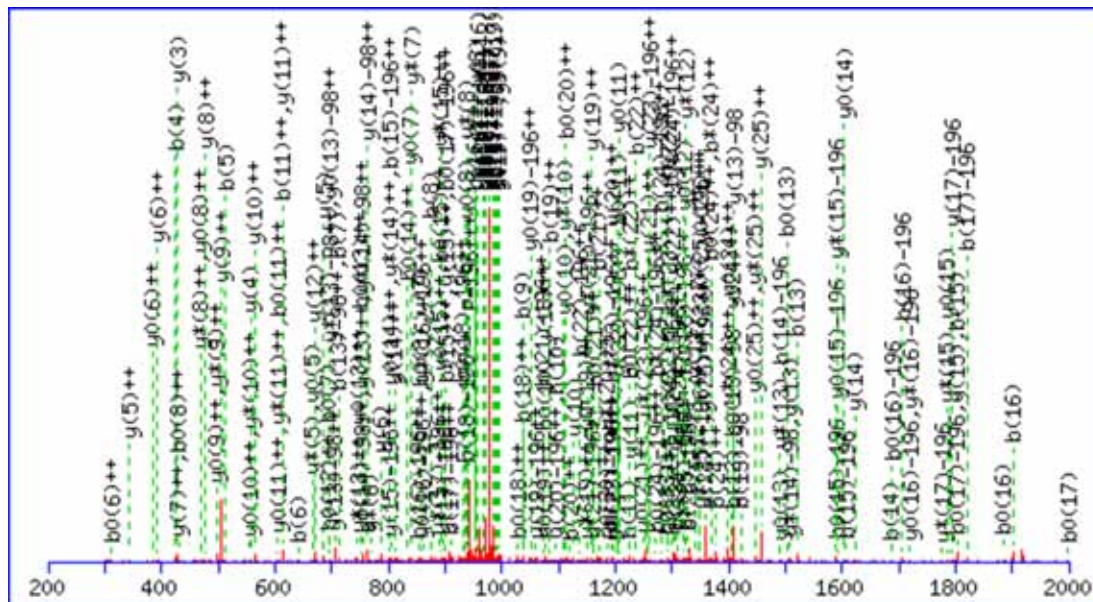

**Monoisotopic mass of neutral peptide Mr(calc):** 3026.2107

**Fixed modifications:** Carbamidomethyl (C) (apply to specified residues or termini only)

**Variable modifications:**

**N-term :** Dimethyl (N-term)

**T12 :** Phospho (ST), with neutral losses 97.9769(shown in table), 0.0000

**S14 :** Phospho (ST), with neutral losses 97.9769(shown in table), 0.0000

**K24 :** Dimethyl (K)

**Ions Score:** 78 **Expect:** 7.9e-007

**Matched b ions:** b(4), b(5), b(6), b(7), b(8), b(9), b(10), b(11)++, b(11), b(12)-98, b(12), b(13), b(13)-98, b(13)-98++, b(14)-98, b(14), b(14)-196, b(15), b(15)-98, b(15)-98++, b(15)-196++, b(15)-196, b(15)++, b(16)-98, b(16), b(16)-196++, b(16)-196, b(16)++, b(16)-98++, b(17)-98, b(17)-196, b(17)-98++, b(17)-196++, b(18)-196++, b(18)-98++, b(18)++, b(18)-98, b(19)-196++, b(19)-98++, b(19)++, b(20)-98++, b(20)++, b(21)++, b(21)-196++, b(21)-98++, b(22)-196++, b(22)-98++, b(22)++, b(23)++, b(24)-98++, b(24)++, b(24)-196++, b(25)-98++, b(25)-196++

**Matched y ions:** y(3), y(4), y(5)++, y(5), y(6)++, y(6), y(7), y(7)++, y(8)++, y(8), y(9)++, y(10)++, y(10), y(11)++, y(11), y(12)++, y(12), y(13)-98++, y(13), y(13)++, y(13)-98, y(14)-98++, y(14)++, y(14), y(15), y(15)-98++, y(15)-196++, y(15)-98, y(15)++, y(16)++, y(17)-196, y(17)-196++, y(17)-98++, y(17)++, y(18)-98++, y(18)++, y(18)-196++, y(19)++, y(19)-196++, y(19)-98++, y(20)++, y(20)-196++, y(20)-98++, y(21)-196++, y(21)++, y(22)-98++, y(22)++, y(22)-196++, y(23)++, y(23)-196++, y(23)-98++, y(24)-98++, y(24)++, y(24)-196++, y(25)-196++, y(25)-98++, y(25)++

**Precursor origin neutral loss:** +

## Peptide No.901

**SPPDSEAYYGETDSDVDGPATQEKPR**

**Confirmed sites:** @Y:9,@S:14

**Ambiguous sites:**

MS/MS Fragmentation of **SPPDSEAYYGETDSDVDGPATQEKPR**

Found in **SYP2L\_MOUSE**, Synaptopodin 2-like protein OS=Mus musculus GN=Synpo2l PE=2 SV=1

Match to Query 7583: 3038.277090 from(1013.766306,3+)

Title: Elution from: 39.010 to 39.010 scan no 3372 cid35.00 polarity:+:MA10:m1s

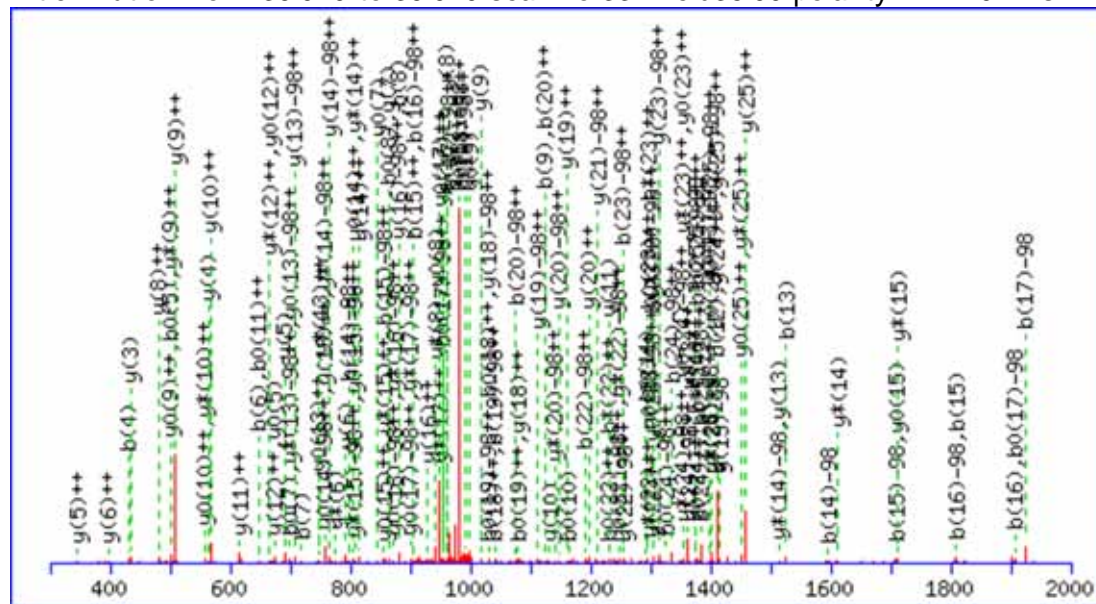

Monoisotopic mass of neutral peptide Mr(calc): 3038.2744

Fixed modifications: Carbamidomethyl (C) (apply to specified residues or termini only)

Variable modifications:

N-term : Dimethyl:2H(4)13C(2) (N-term)

Y9 : Phospho (Y)

S14 : Phospho (ST), with neutral losses 0.0000(shown in table), 97.9769

K24 : Dimethyl:2H(4)13C(2) (K)

Ions Score: 91 Expect: 6e-008

Matched b ions: b(4), b(6), b(7), b(8), b(9), b(12), b(13), b(14)-98, b(14)-98++, b(15)-98, b(15)-98++, b(15)++, b(16)-98, b(16), b(16)-98++, b(16)++, b(17)-98, b(17)-98++, b(18)-98, b(18)-98++, b(18)++, b(19)-98, b(19)-98++, b(20)-98, b(20)-98++, b(22)-98, b(22)-98++, b(23)-98, b(23)-98++, b(23)++, b(24)-98, b(24)-98++, b(24)++, b(25)-98, b(25)-98++

Matched y ions: y(3), y(4), y(5), y(5)++, y(6), y(6)++, y(7), y(8)++, y(8), y(9)++, y(9), y(10)++, y(10), y(11)++, y(11), y(12)++, y(13)++, y(13)-98, y(13)-98++, y(13), y(13)-98, y(14)++, y(14)-98, y(14)-98++, y(16)-98, y(16)-98++, y(16)++, y(18)++, y(18)-98, y(18)-98++, y(19)-98, y(19)-98++, y(19)++, y(20)++, y(20)-98, y(20)-98++, y(21)-98, y(21)-98++, y(22)++, y(22)-98, y(22)-98++, y(23)-98, y(23)-98++, y(24)++, y(24)-98, y(24)-98++, y(25)-98, y(25)-98++, y(25)++

Precursor origin neutral loss: +

## Peptide No.902

SPPDSEAYYGETDSDVDGPATQEKPR

Confirmed sites: @T:12,@S:14

Ambiguous sites:

MS/MS Fragmentation of **SPPDSEAYYGETDSDVDGPATQEKPR**

Found in **SYP2L\_MOUSE**, Synaptopodin 2-like protein OS=Mus musculus GN=Synpo2l PE=2 SV=1

Match to Query 7253: 3038.275611 from(1013.765813,3+)

Title: Elution from: 39.000 to 39.000 scan no 3318 cid35.00 polarity:+:MA10:m1s



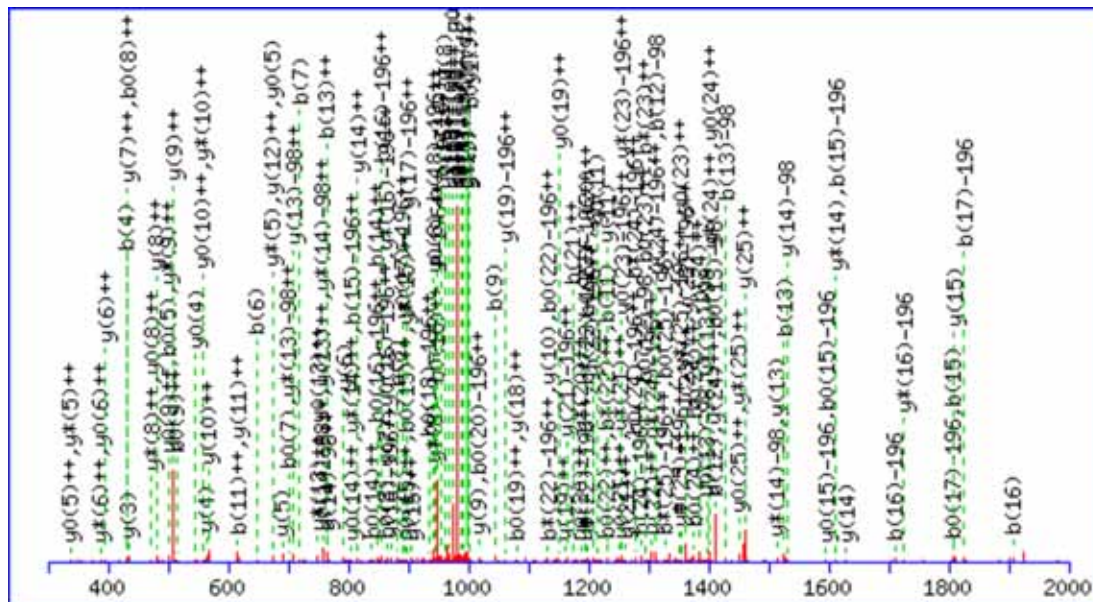

**Monoisotopic mass of neutral peptide Mr(calc):** 3038.2744

**Fixed modifications:** Carbamidomethyl (C) (apply to specified residues or termini only)

**Variable modifications:**

**N-term :** Dimethyl:2H(4)13C(2) (N-term)

**T12 :** Phospho (ST), with neutral losses 97.9769(shown in table), 0.0000

**S14 :** Phospho (ST), with neutral losses 97.9769(shown in table), 0.0000

**K24 :** Dimethyl:2H(4)13C(2) (K)

**Ions Score:** 88 **Expect:** 1.3e-007

**Matched b ions:** b(4), b(6), b(7), b(8), b(9), b(11)++, b(11), b(12)-98, b(12), b(13), b(13)++, b(13)-98, b(14)-98, b(14)++, b(15)-98++, b(15)-196, b(15)-98, b(15), b(15)-196++, b(16)-196++, b(16)-196, b(16)-98, b(16), b(16)-98++, b(16)++, b(17)-196, b(17)-98, b(17)-98++, b(18)-98, b(18)-196++, b(18)-98++, b(19)-196++, b(21)++, b(23)-98++, b(24)-98++, b(24)-196++, b(24)++, b(25)-98++

**Matched y ions:** y(3), y(4), y(5), y(6)++, y(6), y(7)++, y(7), y(8)++, y(8), y(9)++, y(9), y(10)++, y(10), y(11)++, y(11), y(12)++, y(13)-98++, y(13)++, y(13), y(14)-98++, y(14), y(14)++, y(14)-98, y(15)-98++, y(15)-98, y(15), y(15)++, y(16)-196++, y(16)-98++, y(16)++, y(17)-98++, y(17)++, y(17)-196++, y(18)-196++, y(18)++, y(19)-98++, y(19)-196++, y(19)++, y(20)++, y(20)-98++, y(21)-196++, y(21)++, y(22)++, y(22)-196++, y(22)-98++, y(23)-98++, y(23)++, y(24)-196++, y(24)++, y(24)-98++, y(25)-98++, y(25)++, y(25)-196++

**Precursor origin neutral loss:** +

## Peptide No.903

**SPPNPENIAPGYSGPLK**

**Confirmed sites: @S:1**

**Ambiguous sites:**

**MS/MS Fragmentation of SPPNPENIAPGYSGPLK**

Found in **MYOZ2\_MOUSE**, Myozenin-2 OS=Mus musculus GN=Myoz2 PE=1 SV=1

Match to Query 4323: 1872.903416 from(937.458984,2+)

Title: Elution from: 48.923 to 48.923 scan no 4624 cid35.00 polarity:+:MA10:m1s



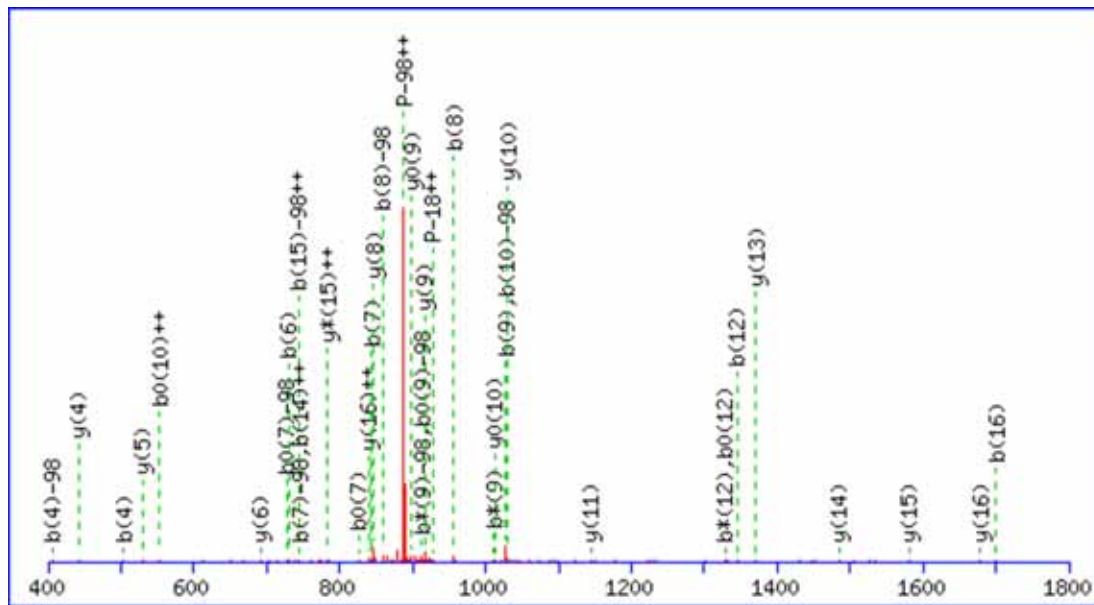

**Monoisotopic mass of neutral peptide Mr(calc):** 1872.9022

**Fixed modifications:** Carbamidomethyl (C) (apply to specified residues or termini only)

**Variable modifications:**

**N-term :** Dimethyl (N-term)

**S1 :** Phospho (ST), with neutral losses 97.9769(shown in table), 0.0000

**K17 :** Dimethyl (K)

**Ions Score:** 52 **Expect:** 0.00041

**Matched b ions:** b(4), b(4)-98, b(6), b(7)-98, b(7), b(8), b(8)-98, b(9), b(10)-98, b(12), b(14)++, b(15)-98++, b(16)

**Matched y ions:** y(4), y(5), y(6), y(8), y(9), y(10), y(11), y(13), y(14), y(15), y(16), y(16)++

**Precursor origin neutral loss:** +

## Peptide No.904

**SPPNPENIAPGYSGPLK**

**Confirmed sites:** @S:1

**Ambiguous sites:**

MS/MS Fragmentation of **SPPNPENIAPGYSGPLK**

Found in **MYOZ2\_MOUSE**, Myozenin-2 OS=Mus musculus GN=Myoz2 PE=1 SV=1

Match to Query 4506: 1884.967834 from(943.491193,2+)

Title: Elution from: 48.609 to 48.609 scan no 4585 cid35.00 polarity:+:MA10:m1s



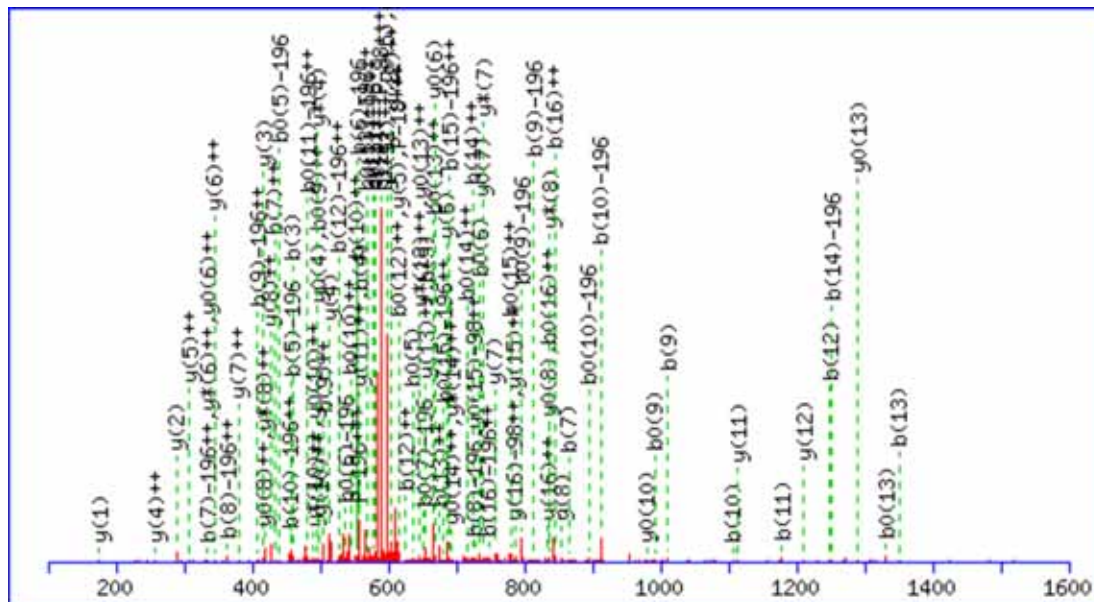

**Monoisotopic mass of neutral peptide Mr(calc):** 1862.7852

**Fixed modifications:** Carbamidomethyl (C) (apply to specified residues or termini only)

**Variable modifications:**

**N-term :** Dimethyl (N-term)

**S1 :** Phospho (ST), with neutral losses 0.0000(shown in table), 97.9769

**S3 :** Phospho (ST), with neutral losses 0.0000(shown in table), 97.9769

**Ions Score:** 32 **Expect:** 0.024

**Matched b ions:** b(3), b(4), b(4)-98, b(5)-98, b(5)-196, b(5), b(6)-196, b(6)-98, b(7)-196++, b(7)++, b(7), b(8)-196++, b(8)-196, b(9)-98, b(9), b(9)-98++, b(9)++, b(9)-196++, b(9)-196, b(10)-196, b(10)-196++, b(10)-98, b(10), b(10)-98++, b(10)++, b(11)++, b(11), b(11)-98, b(11)-98++, b(12), b(12)-196++, b(12)-98++, b(12)++, b(13)++, b(13), b(13)-98, b(13)-196++, b(13)-98++, b(14)-98++, b(14)-98, b(14)-196, b(14)++, b(15)-196++, b(15)-98++, b(16)++, b(16)-196++, b(16)-98++

**Matched y ions:** y(1), y(2), y(3), y(4)++, y(4), y(5)++, y(5), y(6), y(6)++, y(7), y(7)++, y(8)++, y(8), y(10)++, y(11)++, y(11), y(12), y(12)++, y(13)++, y(15)++, y(16)-98++, y(16)++

**Precursor origin neutral loss:** +

## Peptide No.906

**SPSPPPDGSPAATPEIR**

**Confirmed sites:** @S:1,@S:9

**Ambiguous sites:**

**MS/MS Fragmentation of SPSPPPDGSPAATPEIR**

Found in **BIN1\_MOUSE**, Myc box-dependent-interacting protein 1 OS=Mus musculus GN=Bin1 PE=1 SV=1

Match to Query 4095: 1862.787438 from(621.936422,3+)

Title: Elution from: 36.393 to 36.393 scan no 2978 cid35.00 polarity:+:MA10:m1s

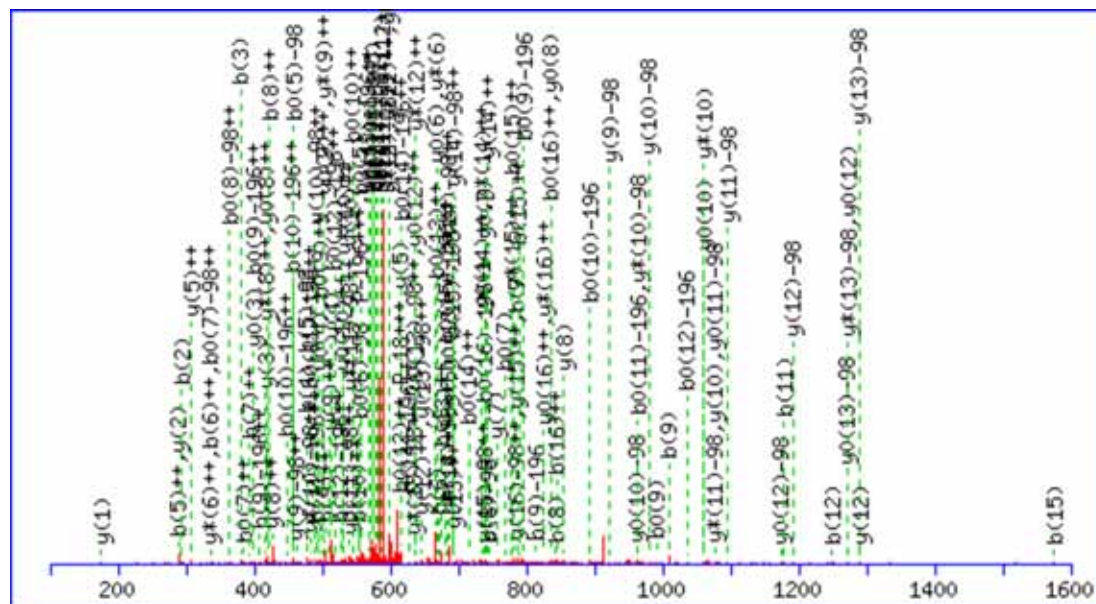

**Monoisotopic mass of neutral peptide Mr(calc):** 1862.7852

**Fixed modifications:** Carbamidomethyl (C) (apply to specified residues or termini only)

**Variable modifications:**

**N-term :** Dimethyl (N-term)

**S1 :** Phospho (ST), with neutral losses 0.0000(shown in table), 97.9769

**S9 :** Phospho (ST), with neutral losses 0.0000(shown in table), 97.9769

**Ions Score:** 44 **Expect:** 0.0013

**Matched b ions:** b(2), b(3), b(4), b(5)++, b(5)-98, b(5), b(6)-98, b(6)++, b(6), b(7), b(7)++, b(8), b(8)++, b(8)-98, b(9)-98, b(9), b(9)-98++, b(9)++, b(9)-196++, b(9)-196, b(10)-98, b(10)-196++, b(10)-98++, b(10)++, b(11)++, b(11), b(11)-98++, b(11)-196++, b(12), b(12)-98++, b(12)-196++, b(13)++, b(13)-196++, b(13)-98++, b(14)-98++, b(14)-196++, b(15), b(15)-98++, b(15)-196++, b(15)++, b(16)++, b(16)-98++

**Matched y ions:** y(1), y(2), y(3), y(4), y(5)++, y(5), y(6), y(7), y(8)++, y(8), y(9)-98++, y(9)++, y(9)-98, y(10), y(10)-98, y(10)-98++, y(10)++, y(11)-98, y(11)++, y(12)-98, y(12), y(12)-98++, y(12)++, y(13)-98, y(13)-98++, y(13)++, y(14)-98++, y(14)++, y(15)++, y(15)-98++, y(16)-98++

**Precursor origin neutral loss:** +

## Peptide No.907

**SPSPPPDGSPAATPEIR**

**Confirmed sites:** @S:1,@S:9,@T:13

**Ambiguous sites:**

**MS/MS Fragmentation of SPSPPPDGSPAATPEIR**

Found in **BIN1\_MOUSE**, Myc box-dependent-interacting protein 1 OS=Mus musculus GN=Bin1 PE=1 SV=1

Match to Query 5343: 1942.751358 from(972.382955,2+)

Title: Elution from: 37.778 to 37.778 scan no 3369 cid35.00 polarity:+:MA10:m1s



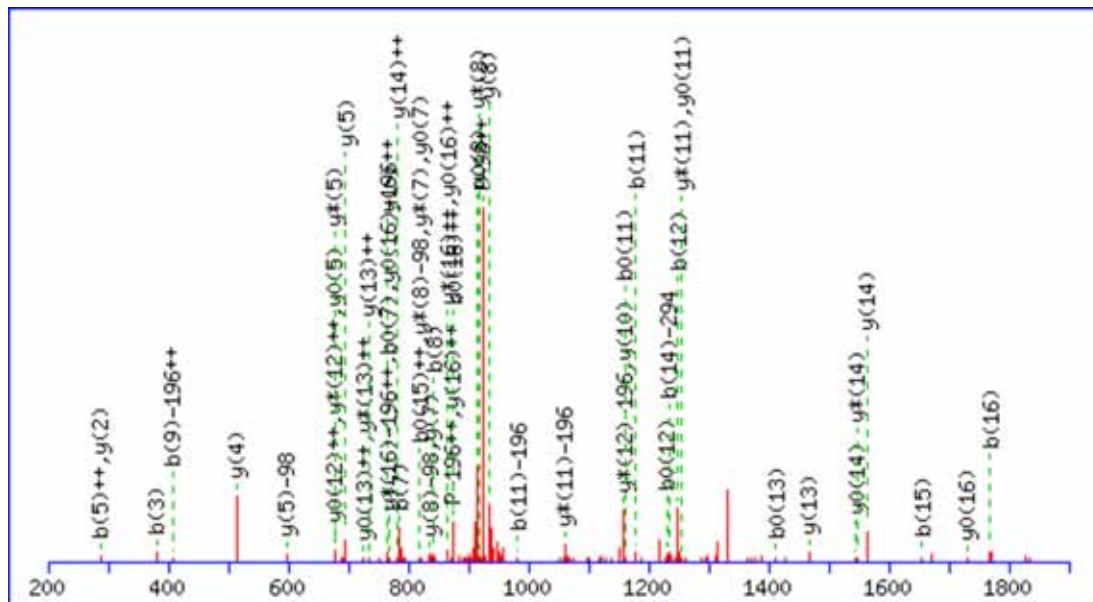

**Monoisotopic mass of neutral peptide Mr(calc):** 1942.7516

**Fixed modifications:** Carbamidomethyl (C) (apply to specified residues or termini only)

**Variable modifications:**

**N-term :** Dimethyl (N-term)

**S1 :** Phospho (ST), with neutral losses 0.0000(shown in table), 97.9769

**S9 :** Phospho (ST), with neutral losses 0.0000(shown in table), 97.9769

**T13 :** Phospho (ST), with neutral losses 0.0000(shown in table), 97.9769

**Ions Score:** 37 **Expect:** 0.0042

**Matched b ions:** b(3), b(5)++, b(7), b(8), b(9)-196++, b(9)-98, b(11), b(11)-196, b(12), b(12)-98, b(13)-98, b(13)-196, b(14)-196, b(14)-294, b(15), b(16)-98, b(16), b(16)-196++, b(16)-98++

**Matched y ions:** y(2), y(4), y(5)-98, y(5), y(6), y(7), y(8), y(8)-98, y(10)-98, y(10), y(13), y(13)++, y(14)-98, y(14), y(14)++, y(14)-98++, y(16)++

**Precursor origin neutral loss:** +

## Peptide No.908

**SPSPPPDGSPAATPEIR**

**Confirmed sites:** @S:1,@T:13

**Ambiguous sites:**

**MS/MS Fragmentation of** **SPSPPPDGSPAATPEIR**

Found in **BIN1\_MOUSE**, Myc box-dependent-interacting protein 1 OS=Mus musculus GN=Bin1 PE=1 SV=1

Match to Query 4774: 1862.784933 from(621.935587,3+)

Title: Elution from: 33.860 to 33.860 scan no 2831 cid35.00 polarity:+:MA10:m1s

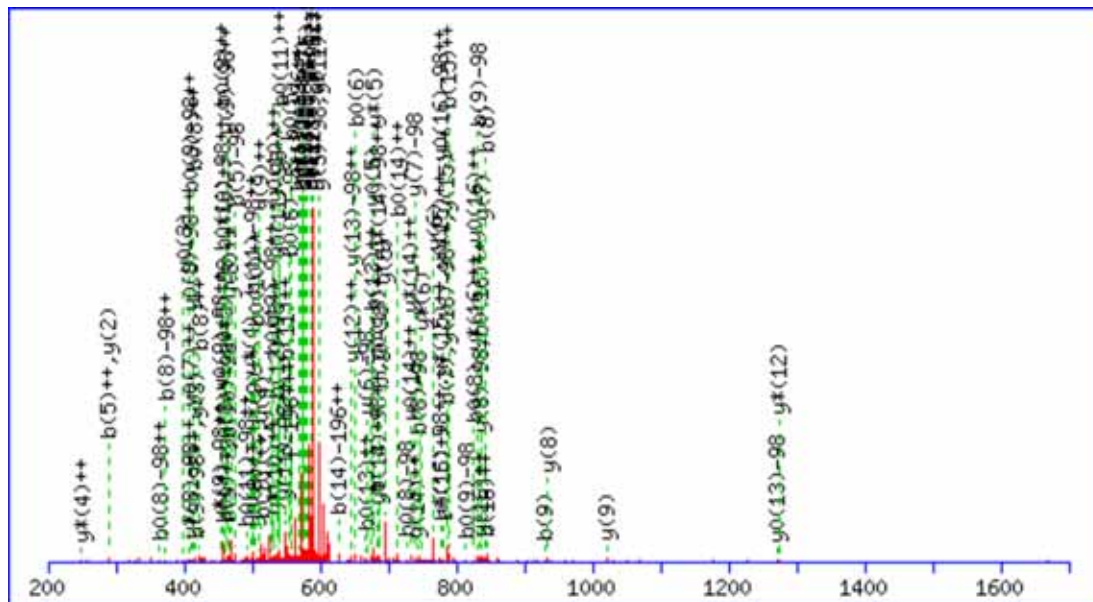

**Monoisotopic mass of neutral peptide Mr(calc):** 1862.7852

**Fixed modifications:** Carbamidomethyl (C) (apply to specified residues or termini only)

**Variable modifications:**

**N-term :** Dimethyl (N-term)

**S1 :** Phospho (ST), with neutral losses 0.0000(shown in table), 97.9769

**T13 :** Phospho (ST), with neutral losses 0.0000(shown in table), 97.9769

**Ions Score:** 29 **Expect:** 0.039

**Matched b ions:** b(5)++, b(5)-98, b(5), b(6)-98, b(7), b(7)-98, b(8)++, b(8)-98, b(8), b(8)-98++, b(9)-98++, b(9), b(9)-98, b(9)++, b(10)++, b(10)-98++, b(11)++, b(11)-98++, b(12)++, b(12)-98++, b(13)-196++, b(13)-98++, b(13)++, b(14)-196++, b(14)-98++, b(15)++, b(15)-98++, b(16)++, b(16)-98++  
**Matched y ions:** y(2), y(3), y(4), y(5), y(5)-98, y(6), y(6)-98, y(7)-98, y(7), y(8), y(8)++, y(8)-98, y(9), y(9)-98++, y(9)++, y(11)++, y(11)-98++, y(12)-98++, y(12)++, y(13)-98++, y(14)++, y(15)++, y(16)-98++, y(16)++

**Precursor origin neutral loss:** +

## Peptide No.909

**SPSPPPDGSPAATPEIR**

**Confirmed sites: @S:3**

**Ambiguous sites:**

MS/MS Fragmentation of **SPSPPPDGSPAATPEIR**

Found in **BIN1\_MOUSE**, Myc box-dependent-interacting protein 1 OS=Mus musculus GN=Bin1 PE=1 SV=1

Match to Query 4229: 1782.820550 from(892.417551,2+)

Title: Elution from: 35.617 to 35.617 scan no 3073 cid35.00 polarity:+:MA10:m1s



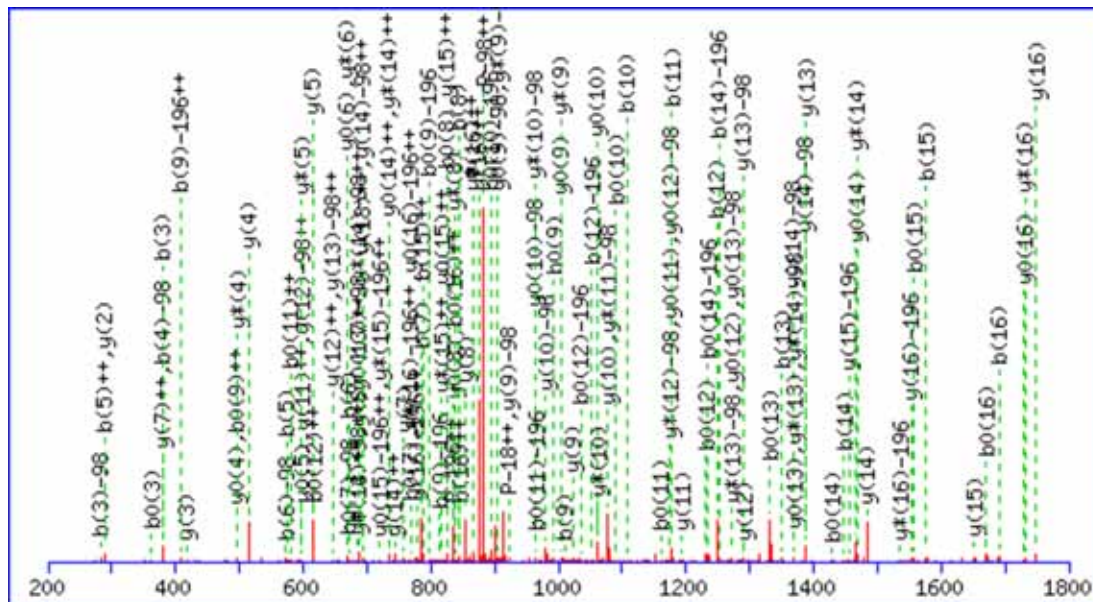

**Monoisotopic mass of neutral peptide Mr(calc):** 1862.7852

**Fixed modifications:** Carbamidomethyl (C) (apply to specified residues or termini only)

**Variable modifications:**

**N-term :** Dimethyl (N-term)

**S3 :** Phospho (ST), with neutral losses 0.0000(shown in table), 97.9769

**S9 :** Phospho (ST), with neutral losses 0.0000(shown in table), 97.9769

**Ions Score:** 84 **Expect:** 1.2e-007

**Matched b ions:** b(3), b(3)-98, b(4)-98, b(5)++, b(5), b(6), b(6)-98, b(7), b(7)-98, b(8), b(9)-196++, b(9)-98, b(9)-196, b(9), b(10)-98, b(10), b(11), b(11)-98, b(12), b(12)-98, b(12)-196, b(13), b(13)-98, b(14)-98, b(14)-196, b(14), b(15), b(15)-98, b(15)++, b(16), b(16)-98, b(16)-98++, b(16)++

**Matched y ions:** y(2), y(3), y(4), y(5), y(6), y(7)++, y(7), y(8), y(9), y(9)-98, y(10), y(10)-98, y(11)++, y(11), y(12), y(12)-98++, y(12)++, y(13)++, y(13), y(13)-98++, y(13)-98, y(14), y(14)++, y(14)-98, y(14)-98++, y(15), y(15)-98, y(15)-196, y(15)++, y(15)-98++, y(16), y(16)++, y(16)-196, y(16)-98, y(16)-98++, y(16)-196++

**Precursor origin neutral loss:** +

## Peptide No.911

**SPSPPPDGSPAATPEIR**

**Confirmed sites:** @S:9

**Ambiguous sites:**

MS/MS Fragmentation of **SPSPPPDGSPAATPEIR**

Found in **BIN1\_MOUSE**, Myc box-dependent-interacting protein 1 OS=Mus musculus GN=Bin1 PE=1 SV=1

Match to Query 3606: 1782.819892 from(892.417222,2+)

Title: Elution from: 33.747 to 33.747 scan no 2648 cid35.00 polarity:+:MA10



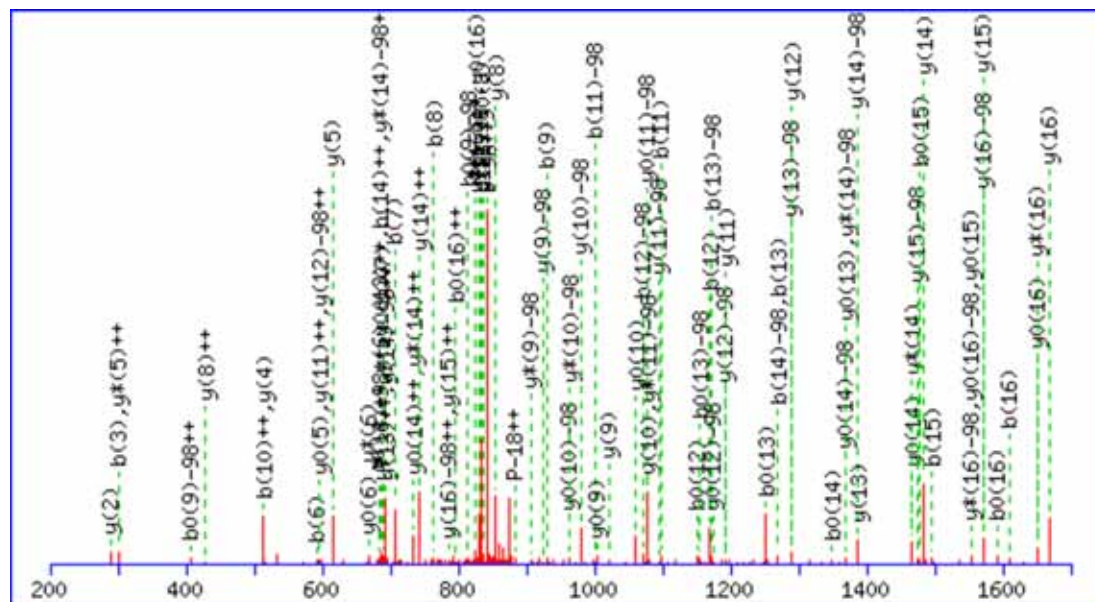

**Monoisotopic mass of neutral peptide Mr(calc):** 1782.8189

**Fixed modifications:** Carbamidomethyl (C) (apply to specified residues or termini only)

**Variable modifications:**

**N-term :** Dimethyl (N-term)

**S9 :** Phospho (ST), with neutral losses 0.0000(shown in table), 97.9769

**Ions Score:** 90 **Expect:** 5.2e-008

**Matched b ions:** b(3), b(6), b(7), b(8), b(9), b(9)-98, b(10)++, b(11), b(11)-98, b(12), b(12)-98, b(13), b(13)-98, b(14)-98, b(14)++, b(15), b(16)

**Matched y ions:** y(2), y(4), y(5), y(6), y(8)++, y(8), y(9), y(9)-98, y(10)-98, y(10), y(11)++, y(11), y(11)-98, y(12)-98, y(12), y(12)-98++, y(13)++, y(13), y(13)-98, y(14)++, y(14)-98, y(14), y(14)-98++, y(15), y(15)-98, y(15)++, y(16)-98, y(16), y(16)++, y(16)-98++

**Precursor origin neutral loss:** +

## Peptide No.912

**SPSPPPDGSPAATPEIR**

**Confirmed sites:** @S:9,@T:13

**Ambiguous sites:**

**MS/MS Fragmentation of SPSPPPDGSPAATPEIR**

Found in **BIN1\_MOUSE**, Myc box-dependent-interacting protein 1 OS=Mus musculus GN=Bin1 PE=1 SV=1

Match to Query 4779: 1862.785764 from(932.400158,2+)

Title: Elution from: 33.679 to 33.679 scan no 2807 cid35.00 polarity:+:MA10:m1s

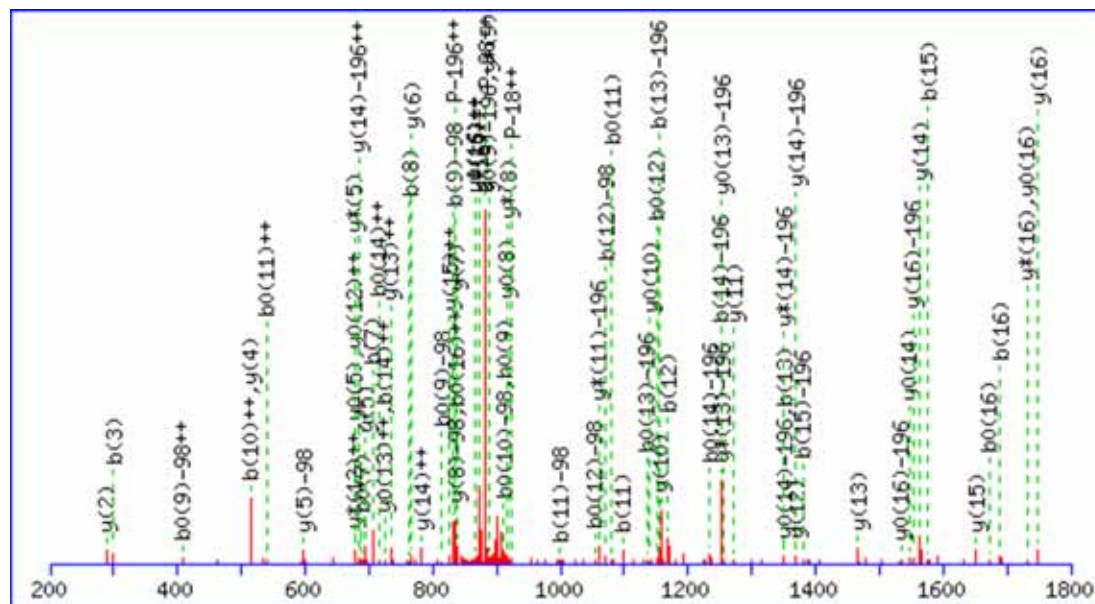

**Monoisotopic mass of neutral peptide Mr(calc):** 1862.7852

**Fixed modifications:** Carbamidomethyl (C) (apply to specified residues or termini only)

**Variable modifications:**

**N-term :** Dimethyl (N-term)

**S9 :** Phospho (ST), with neutral losses 0.0000(shown in table), 97.9769

**T13 :** Phospho (ST), with neutral losses 0.0000(shown in table), 97.9769

**Ions Score:** 53 **Expect:** 0.00019

**Matched b ions:** b(3), b(7), b(8), b(9)-98, b(10)++, b(11), b(11)-98, b(12), b(12)-98, b(13)-98, b(13), b(13)-196, b(14)-196, b(14)-98, b(14)++, b(15)-98, b(15), b(15)-196, b(16), b(16)-98

**Matched y ions:** y(2), y(4), y(5)-98, y(5), y(6), y(7), y(8)-98, y(9)-98, y(10)-98, y(10), y(11), y(12), y(12)-98, y(13)-98, y(13), y(13)-98++, y(13)++, y(14)-98, y(14), y(14)++, y(14)-196++, y(14)-98++, y(14)-196, y(15), y(15)-98, y(15)++, y(16)-98, y(16), y(16)++, y(16)-196, y(16)-98++

**Precursor origin neutral loss:** +

## Peptide No.913

**SPSPPPDGSPAATPEIR**

**Confirmed sites:** @S:9

**Ambiguous sites:** @S:1orS:3

MS/MS Fragmentation of **SPSPPPDGSPAATPEIR**

Found in **BIN1\_MOUSE**, Myc box-dependent-interacting protein 1 OS=Mus musculus GN=Bin1 PE=1 SV=1

Match to Query 3847: 1868.818860 from(935.416706,2+)

Title: Elution from: 35.834 to 35.834 scan no 2886 cid35.00 polarity:+:MA10

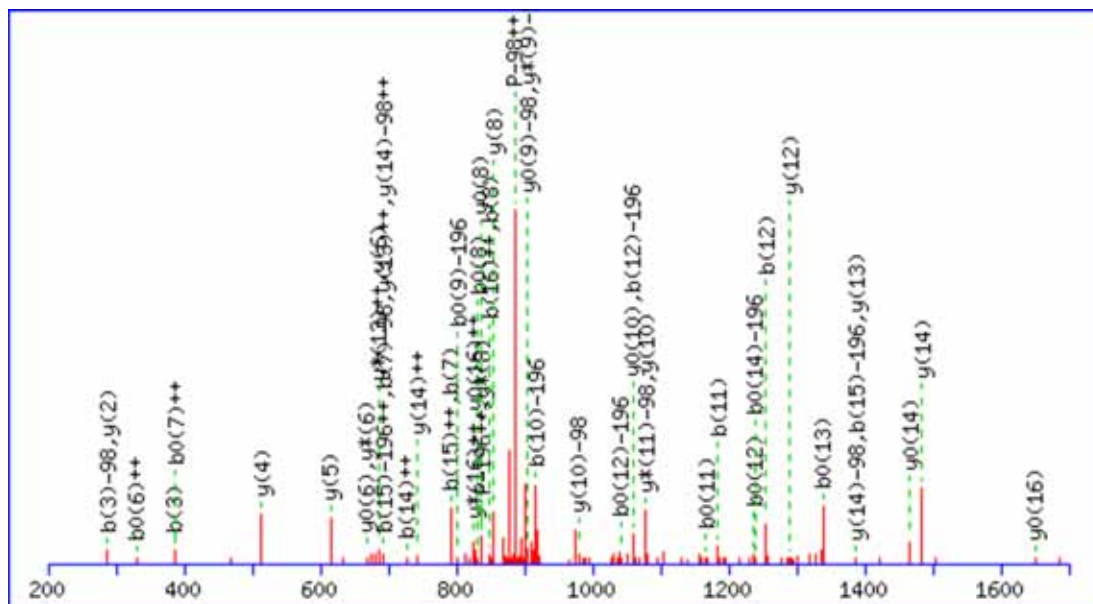

**Monoisotopic mass of neutral peptide Mr(calc):** 1868.8171

**Fixed modifications:** Carbamidomethyl (C) (apply to specified residues or termini only)

**Variable modifications:**

**N-term :** Dimethyl:2H(4)13C(2) (N-term)

**S1 :** Phospho (ST), with neutral losses 0.0000(shown in table), 97.9769

**S9 :** Phospho (ST), with neutral losses 0.0000(shown in table), 97.9769

**Ions Score:** 36 **Expect:** 0.0096

**Matched b ions:** b(3), b(3)-98, b(7)-98, b(7), b(8), b(9)-98, b(10)-196, b(11), b(12), b(12)-196, b(12)-98, b(13)-98, b(14)++, b(15)-196++, b(15)-98, b(15)-98++, b(15)++, b(15)-196, b(16)++

**Matched y ions:** y(2), y(4), y(5), y(6), y(8), y(10), y(10)-98, y(12), y(13)++, y(13), y(14)-98++, y(14), y(14)++, y(14)-98

**Precursor origin neutral loss:** +

## Peptide No.914

**SPSPPPDGSPAATPEIR**

**Confirmed sites:** @S:3

**Ambiguous sites:**

MS/MS Fragmentation of **SPSPPPDGSPAATPEIR**

Found in **BIN1\_MOUSE**, Myc box-dependent-interacting protein 1 OS=Mus musculus GN=Bin1 PE=1 SV=1

Match to Query 4874: 1788.850580 from(895.432566,2+)

Title: Elution from: 34.784 to 34.784 scan no 2894 cid35.00 polarity:+:MA10

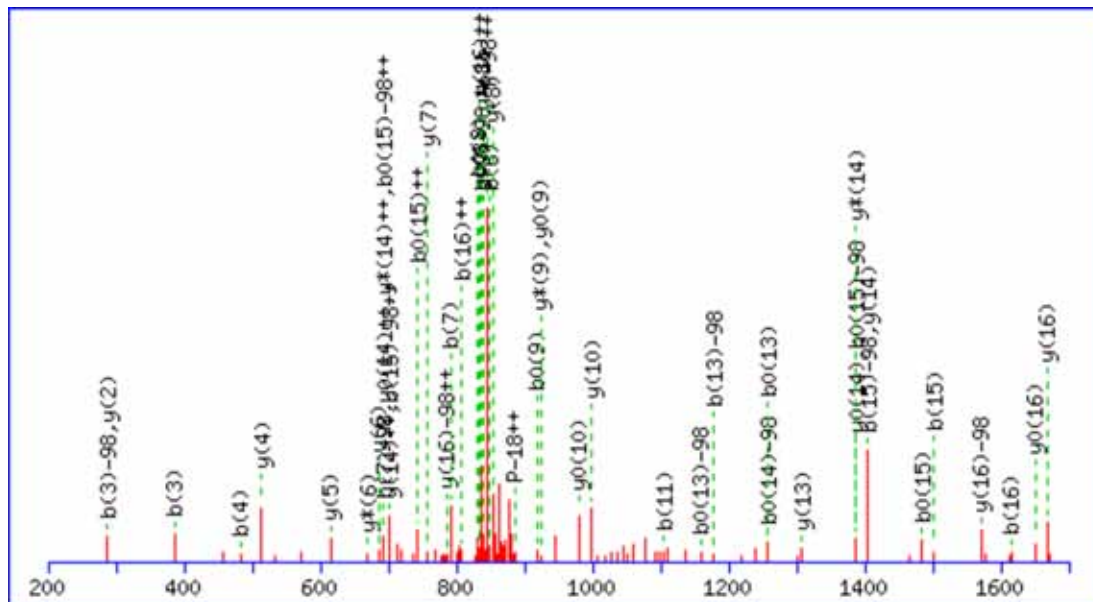

**Monoisotopic mass of neutral peptide Mr(calc):** 1788.8507

**Fixed modifications:** Carbamidomethyl (C) (apply to specified residues or termini only)

**Variable modifications:**

**N-term :** Dimethyl:2H(4)13C(2) (N-term)

**S3 :** Phospho (ST), with neutral losses 0.0000(shown in table), 97.9769

**Ions Score:** 48 **Expect:** 0.00083

**Matched b ions:** b(3), b(3)-98, b(4), b(7)-98, b(7), b(8), b(9)-98, b(11), b(13)-98, b(15)-98++, b(15)-98, b(15), b(16), b(16)++

**Matched y ions:** y(2), y(4), y(5), y(6), y(7), y(8), y(10), y(13), y(14)++, y(14), y(16)-98, y(16), y(16)-98++, y(16)++

**Precursor origin neutral loss:** +

## Peptide No.915

**SPSPPPDGSPAATPEIR**

**Confirmed sites:** @S:3,@S:9

**Ambiguous sites:**

MS/MS Fragmentation of **SPSPPPDGSPAATPEIR**

Found in **BIN1\_MOUSE**, Myc box-dependent-interacting protein 1 OS=Mus musculus GN=Bin1 PE=1 SV=1

Match to Query 3818: 1868.818500 from(935.416526,2+)

Title: Elution from: 37.203 to 37.203 scan no 3075 cid35.00 polarity:+:MA10





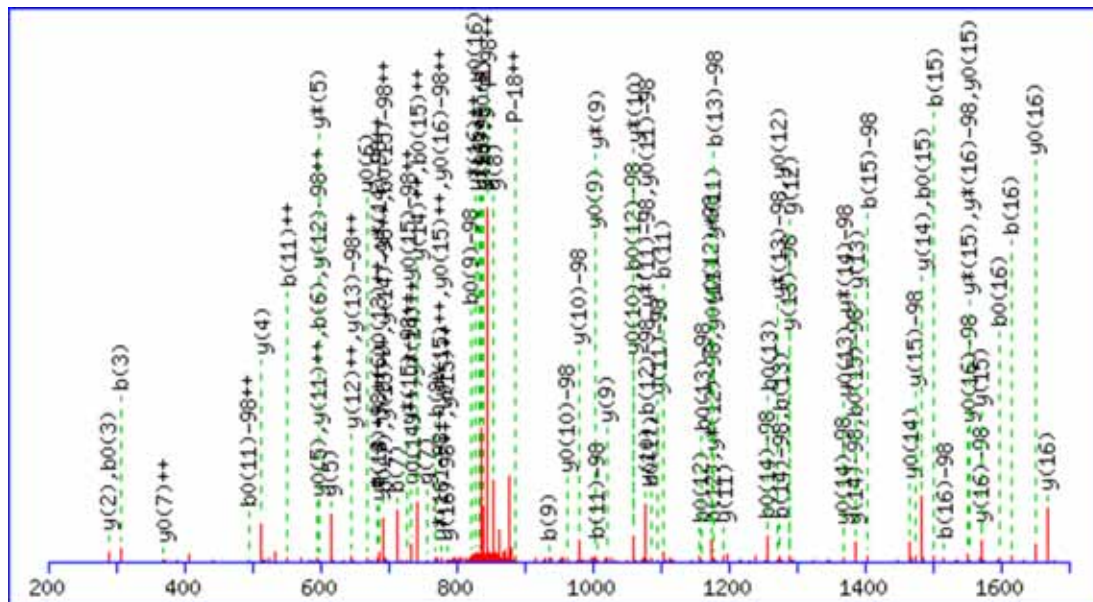

**Monoisotopic mass of neutral peptide Mr(calc): 1788.8507**

**Fixed modifications:** Carbamidomethyl (C) (apply to specified residues or termini only)

**Variable modifications:**

**N-term :** Dimethyl:2H(4)13C(2) (N-term)

**S9 :** Phospho (ST), with neutral losses 0.0000(shown in table), 97.9769

**Ions Score:** 89 **Expect:** 6.6e-008

**Matched b ions:** b(3), b(6), b(7), b(8), b(9), b(9)-98, b(11), b(11)++, b(11)-98, b(12)-98, b(12), b(13)-98, b(13), b(14)-98, b(15)-98, b(15), b(16), b(16)-98

**Matched y ions:** y(2), y(4), y(5), y(6), y(7), y(8), y(9), y(10)-98, y(10), y(11), y(11)++, y(11)-98, y(12)++, y(12), y(12)-98++, y(13), y(13)-98++, y(13)++, y(13)-98, y(14)++, y(14)-98, y(14), y(14)-98++, y(15), y(15)-98, y(15)++, y(16)-98, y(16), y(16)-98++, y(16)++

**Precursor origin neutral loss:** +

## Peptide No.917

**SPSPPPDGSPAATPEIR**

**Confirmed sites:** @S:9,@T:13

**Ambiguous sites:**

**MS/MS Fragmentation of SPSPPPDGSPAATPEIR**

Found in **BIN1\_MOUSE**, Myc box-dependent-interacting protein 1 OS=Mus musculus GN=Bin1 PE=1 SV=1

Match to Query 3817: 1868.818338 from(935.416445,2+)

Title: Elution from: 34.262 to 34.262 scan no 2669 cid35.00 polarity:+:MA10:m1s

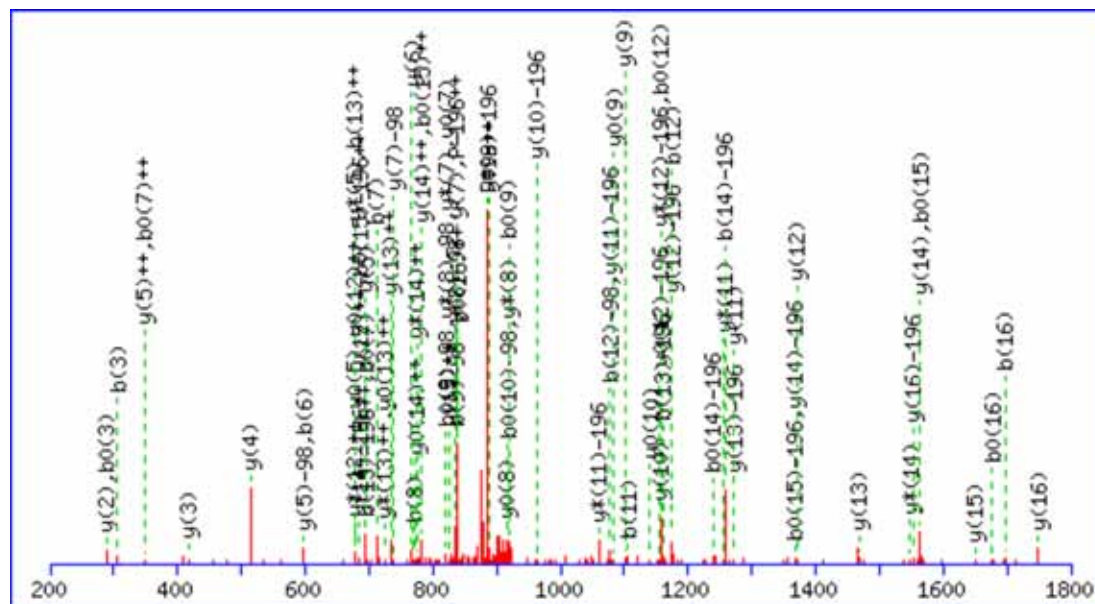

**Monoisotopic mass of neutral peptide Mr(calc):** 1868.8171

**Fixed modifications:** Carbamidomethyl (C) (apply to specified residues or termini only)

**Variable modifications:**

**N-term :** Dimethyl:2H(4)13C(2) (N-term)

**S9 :** Phospho (ST), with neutral losses 0.0000(shown in table), 97.9769

**T13 :** Phospho (ST), with neutral losses 0.0000(shown in table), 97.9769

**Ions Score:** 58 **Expect:** 7.4e-005

**Matched b ions:** b(3), b(6), b(7), b(8), b(9)-98, b(11), b(12), b(12)-98, b(13)-98, b(13)++, b(13)-196, b(14)-196, b(14)-98, b(14)-98++, b(15)-196++, b(16)-98, b(16)

**Matched y ions:** y(2), y(3), y(4), y(5)-98, y(5), y(5)++, y(6), y(7), y(7)-98, y(8)-98, y(9), y(10)-98, y(10), y(10)-196, y(11)-98, y(11)-196, y(11), y(12)++, y(12)-196, y(12), y(12)-98, y(13)-98, y(13), y(13)-98++, y(13)++, y(13)-196, y(14)-98, y(14), y(14)-196++, y(14)-98++, y(14)-196, y(14)++, y(15), y(15)++, y(16), y(16)-196, y(16)-98, y(16)-98++

**Precursor origin neutral loss:** +

## Peptide No.918

**SPSPTPSLPPSWK**

**Confirmed sites:** @S:1,@S:3

**Ambiguous sites:**

**MS/MS Fragmentation of SPSPTPSLPPSWK**

Found in **SYP2L\_MOUSE**, Synaptopodin 2-like protein OS=Mus musculus GN=Synpo2l PE=2 SV=1

Match to Query 3043: 1595.704352 from(798.859452,2+)

Title: Elution from: 51.627 to 51.627 scan no 5098 cid35.00 polarity:+:MA10

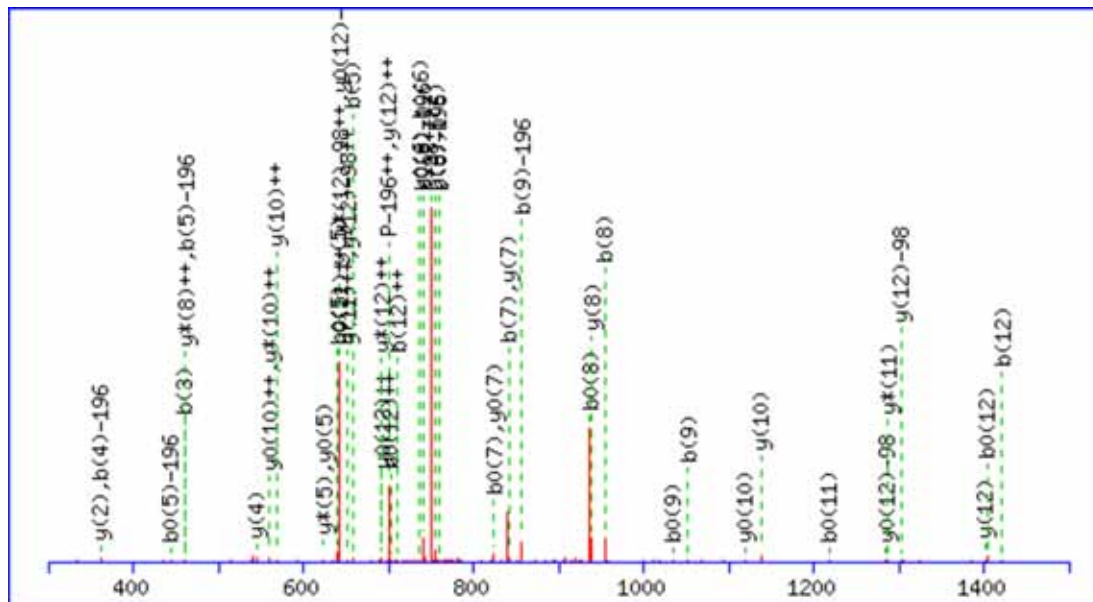

**Monoisotopic mass of neutral peptide Mr(calc): 1595.7038**

**Fixed modifications:** Carbamidomethyl (C) (apply to specified residues or termini only)

**Variable modifications:**

**N-term :** Dimethyl (N-term)

**S1 :** Phospho (ST), with neutral losses 0.0000(shown in table), 97.9769

**S3 :** Phospho (ST), with neutral losses 0.0000(shown in table), 97.9769

**K13 :** Dimethyl (K)

**Ions Score: 50 Expect: 0.00038**

**Matched b ions:** b(3)-98, b(3), b(4)-196, b(5)-196, b(5)-98, b(5), b(6), b(6)-98, b(7), b(7)-98, b(8)-98, b(8), b(8)-196, b(9), b(9)-196, b(9)-98, b(10)-98, b(11)-98++, b(12)-98, b(12), b(12)++

**Matched y ions:** y(2), y(4), y(5), y(6), y(7), y(8), y(10), y(10)++, y(11)++, y(12)++, y(12), y(12)-98, y(12)-98++

**Precursor origin neutral loss: +**

## Peptide No.919

**SPSPTPSLPPSWK**

**Confirmed sites: @S:1,@S:3,@S:7**

**Ambiguous sites:**

**MS/MS Fragmentation of SPSPTPSLPPSWK**

**Found in SYP2L\_MOUSE, Synaptopodin 2-like protein OS=Mus musculus GN=Synpo2l PE=2 SV=1**

**Match to Query 3580: 1675.672512 from(838.843532,2+)**

**Title: Elution from: 55.345 to 55.345 scan no 5493 cid35.00 polarity:+:MA10**





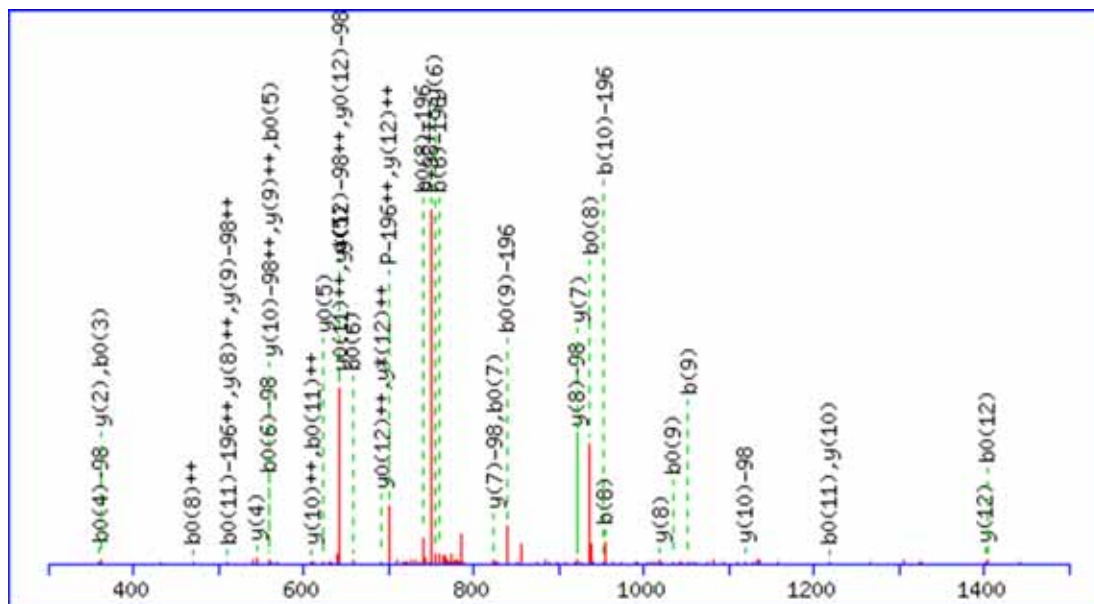

**Monoisotopic mass of neutral peptide Mr(calc):** 1595.7038

**Fixed modifications:** Carbamidomethyl (C) (apply to specified residues or termini only)

**Variable modifications:**

**N-term :** Dimethyl (N-term)

**S1 :** Phospho (ST), with neutral losses 0.0000(shown in table), 97.9769

**S7 :** Phospho (ST), with neutral losses 0.0000(shown in table), 97.9769

**K13 :** Dimethyl (K)

**Ions Score:** 32 **Expect:** 0.02

**Matched b ions:** b(7)-98, b(8), b(8)-98, b(8)-196, b(9)-98, b(9), b(10)-98, b(10)-196, b(11)-98++, b(12)-98

**Matched y ions:** y(2), y(4), y(5), y(6), y(7)-98, y(7), y(8), y(8)++, y(8)-98, y(9)++, y(9)-98++, y(10), y(10)-98++, y(10)-98, y(10)++, y(12)++, y(12)

**Precursor origin neutral loss:** +

## Peptide No.921

**SPSPTPSLPPSWK**

**Confirmed sites:** @S:1,@T:5

**Ambiguous sites:**

**MS/MS Fragmentation of SPSPTPSLPPSWK**

Found in **SYP2L\_MOUSE**, Synaptopodin 2-like protein OS=Mus musculus GN=Synpo2l PE=2 SV=1

Match to Query 3041: 1595.704288 from(798.859420,2+)

Title: Elution from: 53.715 to 53.715 scan no 5324 cid35.00 polarity:+:MA10



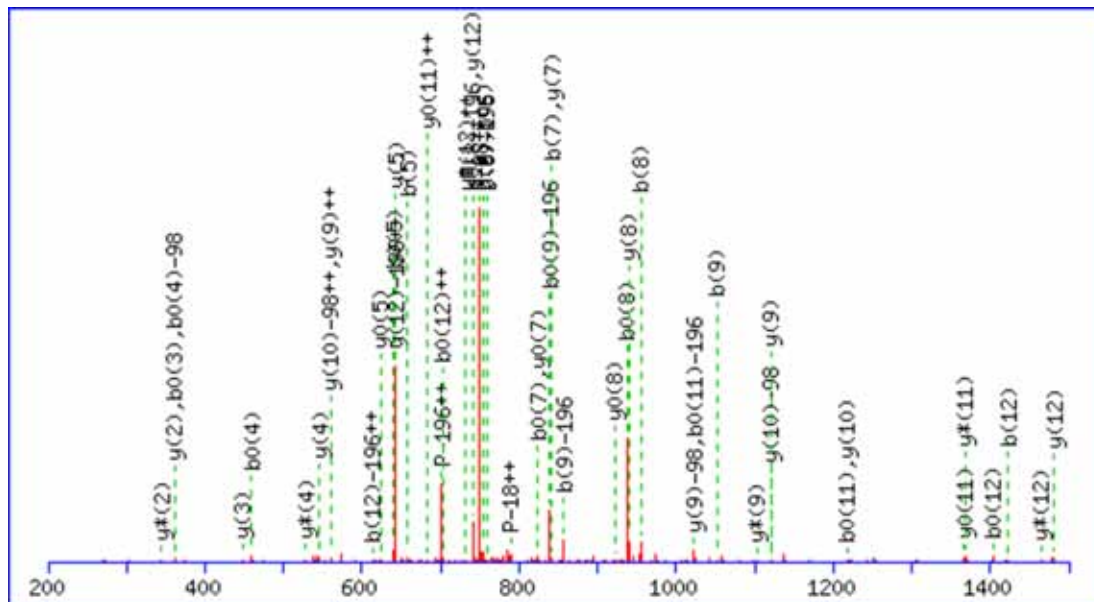

**Monoisotopic mass of neutral peptide Mr(calc):** 1595.7038

**Fixed modifications:** Carbamidomethyl (C) (apply to specified residues or termini only)

**Variable modifications:**

**N-term :** Dimethyl (N-term)

**S3 :** Phospho (ST), with neutral losses 0.0000(shown in table), 97.9769

**T5 :** Phospho (ST), with neutral losses 0.0000(shown in table), 97.9769

**K13 :** Dimethyl (K)

**Ions Score:** 37 **Expect:** 0.0064

**Matched b ions:** b(5)-98, b(5), b(6), b(6)-98, b(7)-98, b(7), b(8)-98, b(8), b(8)-196, b(9)-196, b(9)-98, b(9), b(10)-98, b(11)-98, b(12), b(12)-196++, b(12)-98++

**Matched y ions:** y(2), y(3), y(4), y(5), y(6), y(7), y(8), y(9)-98, y(9)++, y(9), y(10)-98++, y(10), y(10)-98, y(11)-98++, y(12), y(12)++, y(12)-98++, y(12)-196++

**Precursor origin neutral loss:** +

## Peptide No.923

**SPSPTPSLPPSWK**

**Confirmed sites:** @S:1,@S:3

**Ambiguous sites:**

**MS/MS Fragmentation of SPSPTPSLPPSWK**

Found in **SYP2L\_MOUSE**, Synaptopodin 2-like protein OS=Mus musculus GN=Synpo2l PE=2 SV=1

Match to Query 2395: 1607.767948 from(804.891250,2+)

Title: Elution from: 51.571 to 51.571 scan no 4861 cid35.00 polarity:+:MA10



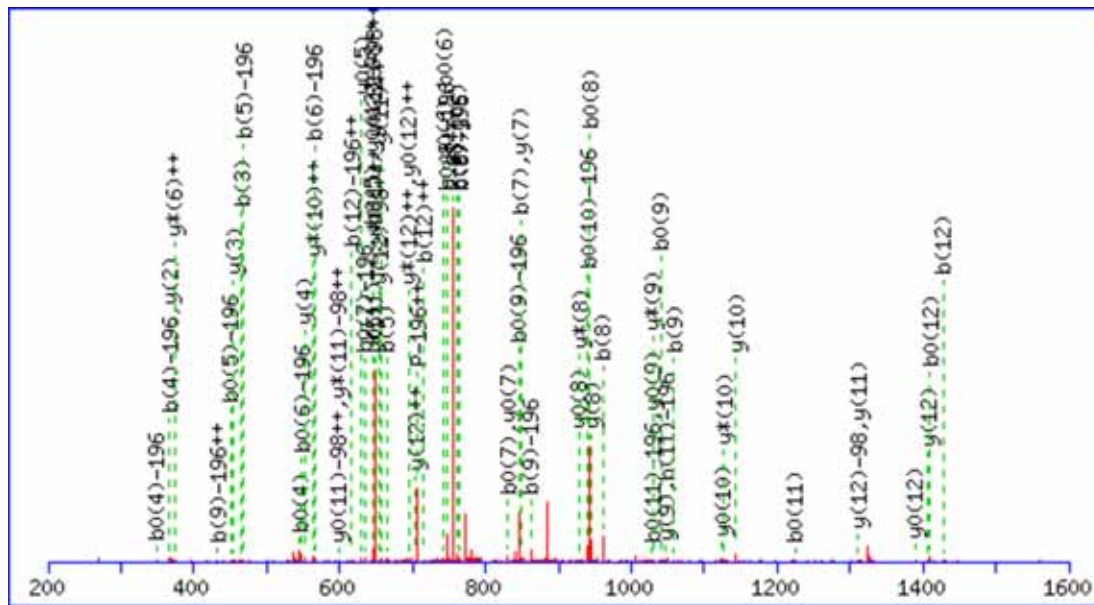

**Monoisotopic mass of neutral peptide Mr(calc):** 1607.7674

**Fixed modifications:** Carbamidomethyl (C) (apply to specified residues or termini only)

**Variable modifications:**

**N-term :** Dimethyl:2H(4)13C(2) (N-term)

**S1 :** Phospho (ST), with neutral losses 0.0000(shown in table), 97.9769

**S3 :** Phospho (ST), with neutral losses 0.0000(shown in table), 97.9769

**K13 :** Dimethyl:2H(4)13C(2) (K)

**Ions Score:** 45 **Expect:** 0.0017

**Matched b ions:** b(3)-98, b(3), b(4)-196, b(5), b(5)-98, b(5)-196, b(6)-98, b(6), b(6)-196, b(7)-98, b(7), b(8)-98++, b(8), b(8)-98, b(8)-196, b(9)-196++, b(9)-98, b(9), b(9)-196, b(10)-98, b(11)-196, b(12), b(12)-98, b(12)-196++, b(12)-98++, b(12)++

**Matched y ions:** y(2), y(3), y(4), y(5), y(6), y(7), y(8), y(9), y(10), y(11), y(11)++, y(12), y(12)-98, y(12)-98++, y(12)++

**Precursor origin neutral loss:** +

## Peptide No.924

**SPSPTPSLPPSWK**

**Confirmed sites:** @S:1,@S:7

**Ambiguous sites:**

**MS/MS Fragmentation of SPSPTPSLPPSWK**

Found in **SYP2L\_MOUSE**, Synaptopodin 2-like protein OS=Mus musculus GN=Synpo2l PE=2 SV=1

Match to Query 2719: 1607.767910 from(804.891231,2+)

Title: Elution from: 51.281 to 51.281 scan no 4892 cid35.00 polarity:+:MA10

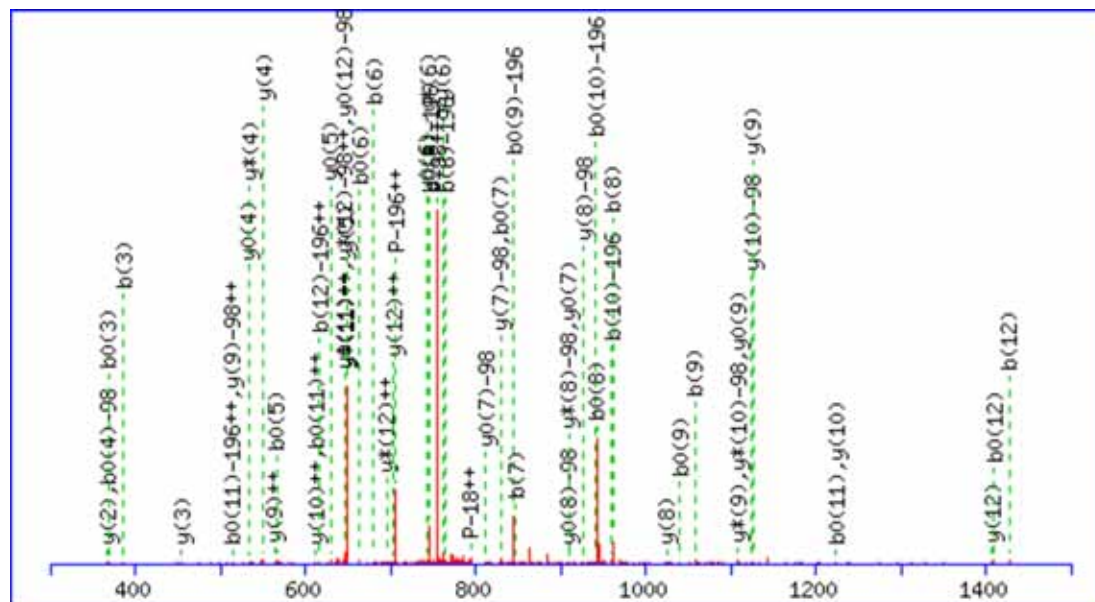

**Monoisotopic mass of neutral peptide Mr(calc):** 1607.7674

**Fixed modifications:** Carbamidomethyl (C) (apply to specified residues or termini only)

**Variable modifications:**

**N-term :** Dimethyl:2H(4)13C(2) (N-term)

**S1 :** Phospho (ST), with neutral losses 0.0000(shown in table), 97.9769

**S7 :** Phospho (ST), with neutral losses 0.0000(shown in table), 97.9769

**K13 :** Dimethyl:2H(4)13C(2) (K)

**Ions Score:** 30 **Expect:** 0.047

**Matched b ions:** b(3), b(6), b(7)-98, b(7), b(8)-98, b(8), b(8)-196, b(9)-98, b(9), b(10)-98, b(10)-196, b(12)-98, b(12), b(12)-196++

**Matched y ions:** y(2), y(3), y(4), y(5), y(6), y(7)-98, y(8), y(8)-98, y(9)++, y(9)-98++, y(9), y(10), y(10)++, y(10)-98, y(12), y(12)++

**Precursor origin neutral loss:** +

## Peptide No.925

**SPSPTPSLPPSWK**

**Confirmed sites:** @S:1,@T:5

**Ambiguous sites:**

**MS/MS Fragmentation of SPSPTPSLPPSWK**

Found in **SYP2L\_MOUSE**, Synaptopodin 2-like protein OS=Mus musculus GN=Synpo2l PE=2 SV=1

Match to Query 2443: 1607.767976 from(804.891264,2+)

Title: Elution from: 51.243 to 51.243 scan no 4676 cid35.00 polarity:+:MA10



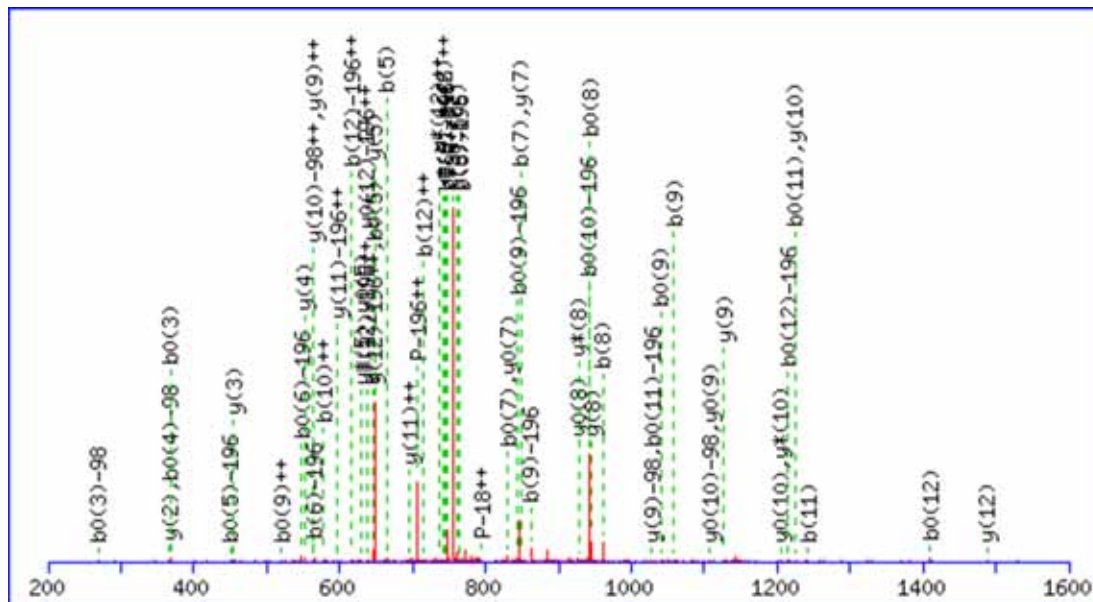

**Monoisotopic mass of neutral peptide Mr(calc): 1607.7674**

**Fixed modifications:** Carbamidomethyl (C) (apply to specified residues or termini only)

**Variable modifications:**

**N-term :** Dimethyl:2H(4)13C(2) (N-term)

**S3 :** Phospho (ST), with neutral losses 0.0000(shown in table), 97.9769

**T5 :** Phospho (ST), with neutral losses 0.0000(shown in table), 97.9769

**K13 :** Dimethyl:2H(4)13C(2) (K)

**Ions Score: 34 Expect: 0.019**

**Matched b ions:** b(5)-98, b(5), b(6), b(6)-98, b(6)-196, b(7)-98, b(7), b(8)-98, b(8), b(8)-196, b(9)-98, b(9)-196, b(9), b(10)-98, b(10)++, b(11)-98, b(11), b(12)-98, b(12)-98++, b(12)-196++, b(12)++

**Matched y ions:** y(2), y(3), y(4), y(5), y(6), y(7), y(8), y(9), y(9)++, y(9)-98, y(10), y(10)-98++, y(11)-98++, y(11)-196++, y(11)++, y(12), y(12)-196++, y(12)-98++, y(12)++

**Precursor origin neutral loss: +**

## Peptide No.927

**SPSVEHDEASDLEVR**

**Confirmed sites: @S:3**

**Ambiguous sites:**

**MS/MS Fragmentation of SPSVEHDEASDLEVR**

Found in **SMTL2\_MOUSE**, Smoothelin-like protein 2 OS=Mus musculus GN=Smtnl2 PE=1 SV=1

Match to Query 4171: 1776.756300 from(889.385426,2+)

Title: Elution from: 34.765 to 34.765 scan no 2956 cid35.00 polarity:+:MA10



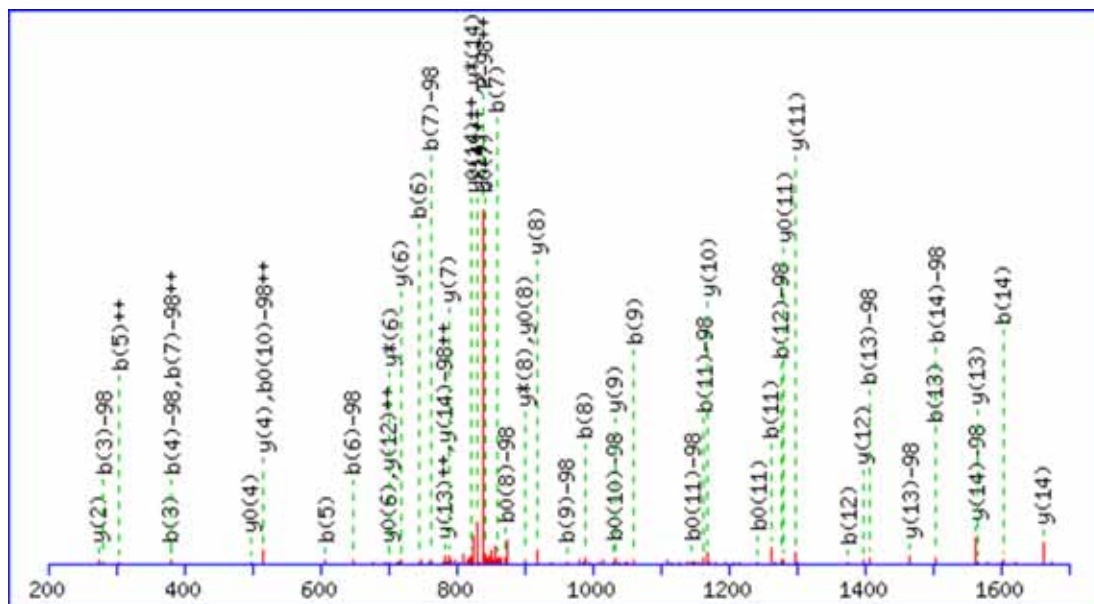

**Monoisotopic mass of neutral peptide Mr(calc):** 1776.7567

**Fixed modifications:** Carbamidomethyl (C) (apply to specified residues or termini only)

**Variable modifications:**

**N-term :** Dimethyl (N-term)

**S3 :** Phospho (ST), with neutral losses 97.9769(shown in table), 0.0000

**Ions Score:** 77 **Expect:** 7.4e-007

**Matched b ions:** b(3), b(3)-98, b(4)-98, b(5), b(5)++, b(6)-98, b(6), b(7)-98++, b(7)-98, b(7), b(8), b(9), b(9)-98, b(11), b(11)-98, b(12)-98, b(12), b(13)-98, b(13), b(14), b(14)-98

**Matched y ions:** y(2), y(4), y(6), y(7), y(8), y(9), y(10), y(11), y(12), y(12)++, y(13)-98, y(13), y(13)++, y(14)-98, y(14), y(14)++, y(14)-98++

**Precursor origin neutral loss:** +

## Peptide No.928

**SPSVEHDEASDLEVR**

**Confirmed sites:** @S:3

**Ambiguous sites:**

MS/MS Fragmentation of **SPSVEHDEASDLEVR**

Found in **SMTL2\_MOUSE**, Smoothelin-like protein 2 OS=Mus musculus GN=Smtnl2 PE=1 SV=1

Match to Query 3260: 1782.790872 from(595.270900,3+)

Title: Elution from: 34.747 to 34.747 scan no 2749 cid35.00 polarity:+:MA10



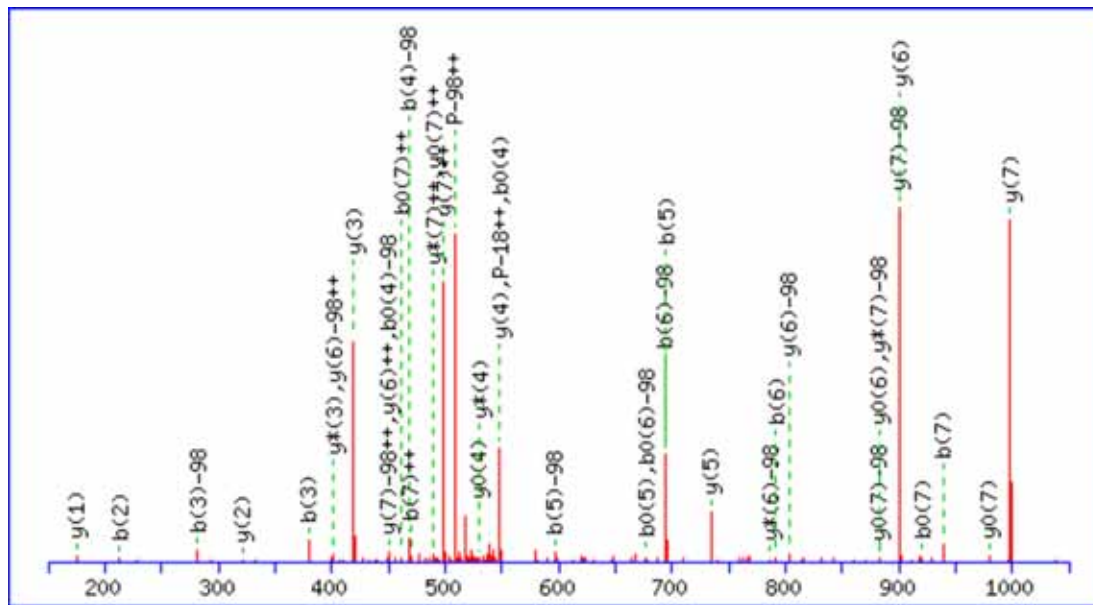

**Monoisotopic mass of neutral peptide Mr(calc):** 1112.4692

**Fixed modifications:** Carbamidomethyl (C) (apply to specified residues or termini only)

**Variable modifications:**

**N-term :** Dimethyl (N-term)

**S3 :** Phospho (ST), with neutral losses 97.9769(shown in table), 0.0000

**Ions Score:** 51 **Expect:** 8.7e-005

**Matched b ions:** b(2), b(3)-98, b(3), b(4)-98, b(5), b(5)-98, b(6), b(6)-98, b(7), b(7)++

**Matched y ions:** y(1), y(2), y(3), y(4), y(5), y(6)-98, y(6), y(6)++, y(6)-98++, y(7)-98, y(7), y(7)++, y(7)-98++

**Precursor origin neutral loss:** +

## Peptide No.930

**SPSWEPFR**

**Confirmed sites:** @S:3

**Ambiguous sites:**

**MS/MS Fragmentation of SPSWEPFR**

Found in **HSPB1\_MOUSE**, Heat shock protein beta-1 OS=Mus musculus GN=Hspb1 PE=1 SV=3

Match to Query 772: 1118.500710 from(560.257631,2+)

Title: Elution from: 49.435 to 49.435 scan no 4684 cid35.00 polarity:+:MA10

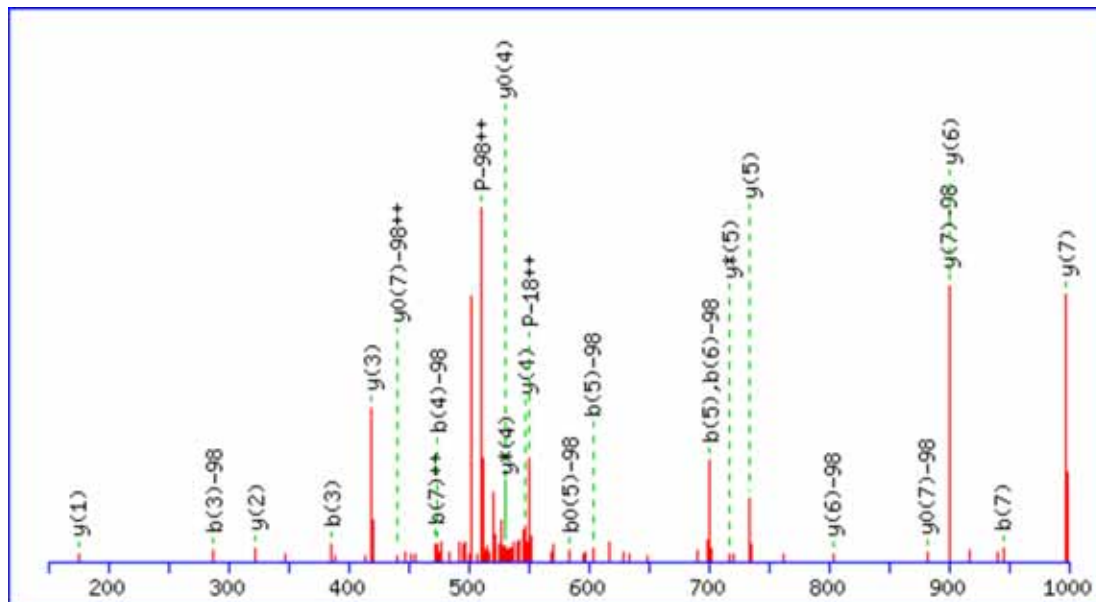

**Monoisotopic mass of neutral peptide Mr(calc):** 1118.5010

**Fixed modifications:** Carbamidomethyl (C) (apply to specified residues or termini only)

**Variable modifications:**

**N-term :** Dimethyl:2H(4)13C(2) (N-term)

**S3 :** Phospho (ST), with neutral losses 97.9769(shown in table), 0.0000

**Ions Score:** 44 **Expect:** 0.00068

**Matched b ions:** b(3)-98, b(3), b(4)-98, b(5), b(5)-98, b(6)-98, b(7), b(7)++

**Matched y ions:** y(1), y(2), y(3), y(4), y(5), y(6)-98, y(6), y(7)-98, y(7)

**Precursor origin neutral loss:** +

## Peptide No.931

**SQSPAASDCSSSSSSASLPSSGR**

**Confirmed sites:** @S:3

**Ambiguous sites:**

MS/MS Fragmentation of **SQSPAASDCSSSSSSASLPSSGR**

Found in **BAG3\_MOUSE**, BAG family molecular chaperone regulator 3 OS=Mus musculus GN=Bag3  
PE=1 SV=1

Match to Query 5972: 2306.933636 from(1154.474094,2+)

Title: Elution from: 27.573 to 27.573 scan no 1791 cid35.00 polarity:+:MA10:m1s



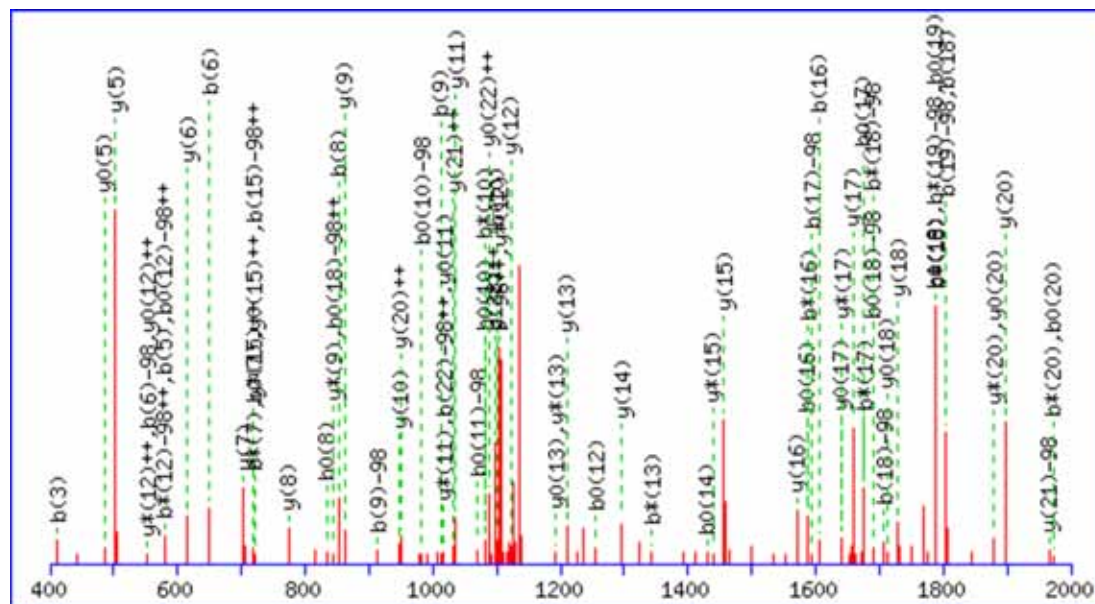

**Monoisotopic mass of neutral peptide Mr(calc):** 2306.9322

**Fixed modifications:** Carbamidomethyl (C) (apply to specified residues or termini only)

**Variable modifications:**

**N-term :** Dimethyl (N-term)

**S3 :** Phospho (ST), with neutral losses 97.9769(shown in table), 0.0000

**Ions Score:** 88 **Expect:** 6.9e-008

**Matched b ions:** b(3), b(5), b(6)-98, b(6), b(8), b(9)-98, b(9), b(10), b(15)-98++, b(16), b(17)-98, b(18), b(18)-98, b(19)-98, b(22)-98++

**Matched y ions:** y(5), y(6), y(7), y(8), y(9), y(10), y(11), y(12), y(13), y(14), y(15), y(16), y(17), y(18), y(20)++, y(20), y(21)-98, y(21)++, y(22)++

**Precursor origin neutral loss:** +

## Peptide No.932

**SQSPAASDCSSSSSSASLPSSGR**

**Confirmed sites:** @S:1

**Ambiguous sites:**

MS/MS Fragmentation of **SQSPAASDCSSSSSSASLPSSGR**

Found in **BAG3\_MOUSE**, BAG family molecular chaperone regulator 3 OS=Mus musculus GN=Bag3 PE=1 SV=1

Match to Query 5632: 2312.964968 from(1157.489760,2+)

Title: Elution from: 27.579 to 27.579 scan no 1827 cid35.00 polarity:+:MA10:m1s



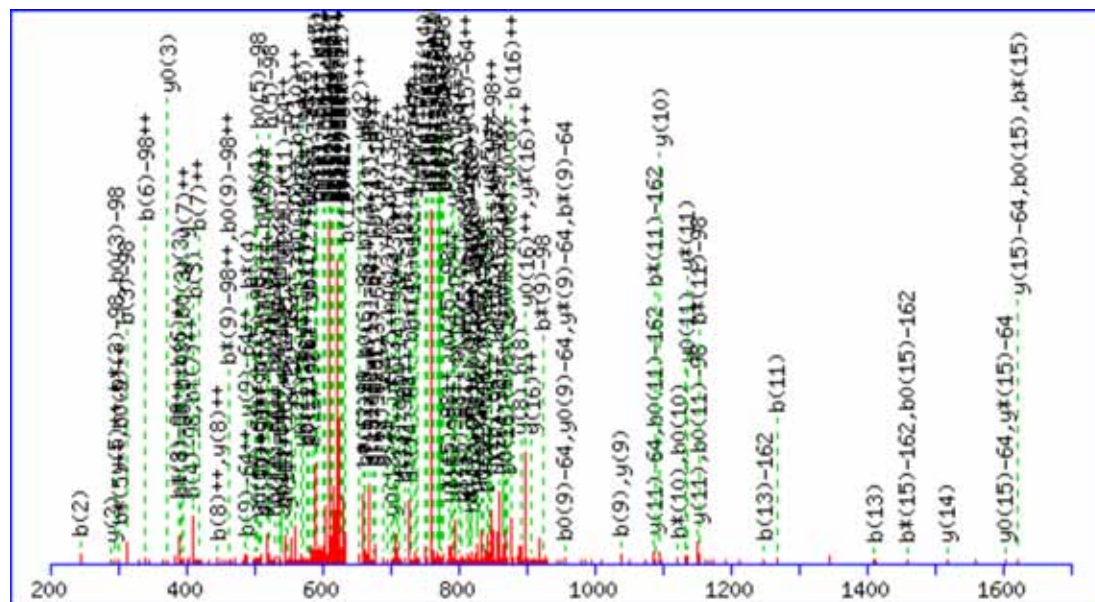

**Monoisotopic mass of neutral peptide Mr(calc):** 1927.8710

**Fixed modifications:** Carbamidomethyl (C) (apply to specified residues or termini only)

**Variable modifications:**

**N-term :** Dimethyl (N-term)

**S3 :** Phospho (ST), with neutral losses 0.0000(shown in table), 97.9769

**M9 :** Oxidation (M), with neutral losses 0.0000(shown in table), 63.9983

**K17 :** Dimethyl (K)

**Ions Score:** 43 **Expect:** 0.0026

**Matched b ions:** b(2), b(3)-98, b(3), b(4)-98, b(5)-98, b(5), b(6)++, b(6)-98++, b(6)-98, b(6), b(7), b(7)-98, b(7)++, b(8)++, b(8)-98, b(8), b(9)++, b(9), b(10)++, b(11), b(11)-98++, b(11)++, b(12)++, b(12)-98++, b(13), b(13)++, b(14)-98++, b(14)++, b(15)++, b(16)++, b(16)-98++

**Matched y ions:** y(2), y(3), y(4), y(5)++, y(5), y(6), y(7), y(7)++, y(8)++, y(8), y(9)++, y(9), y(10), y(10)++, y(11), y(11)++, y(12)++, y(13)++, y(14)++, y(14), y(15)-98++, y(15)++, y(16)-98++, y(16)++

**Precursor origin neutral loss:** +

## Peptide No.934

**SQSPLRGGMTEAAQTDK**

**Confirmed sites:** @S:1

**Ambiguous sites:**

MS/MS Fragmentation of **SQSPLRGGMTEAAQTDK**

Found in **BAG3\_MOUSE**, BAG family molecular chaperone regulator 3 OS=Mus musculus GN=Bag3  
PE=1 SV=1

Match to Query 4506: 1939.935102 from(647.652310,3+)

Title: Elution from: 24.214 to 24.214 scan no 1397 cid35.00 polarity:+:MA10

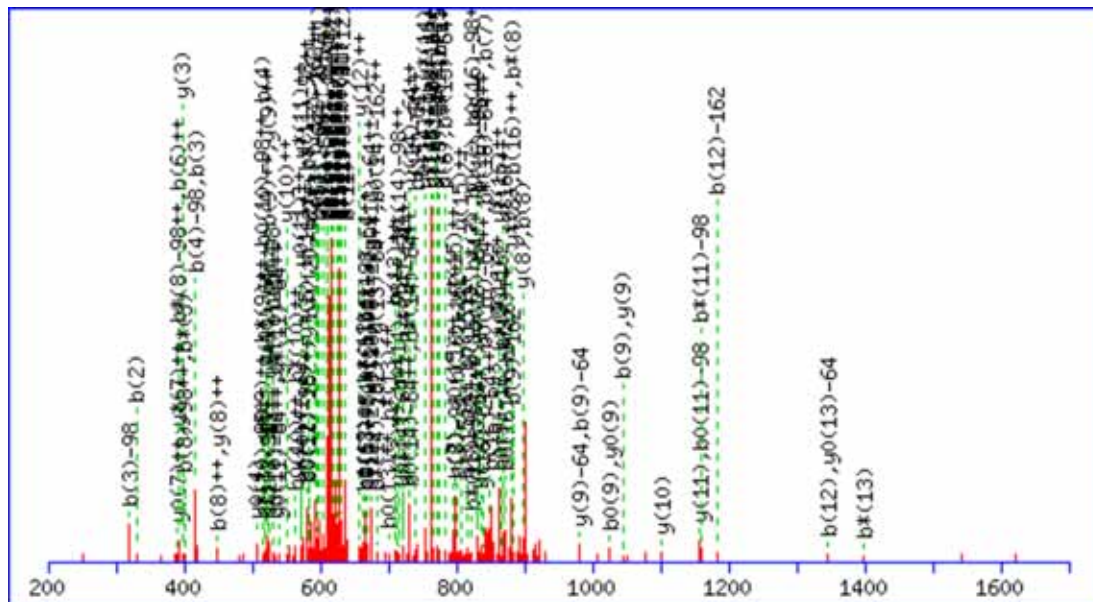

**Monoisotopic mass of neutral peptide Mr(calc):** 1939.9347

**Fixed modifications:** Carbamidomethyl (C) (apply to specified residues or termini only)

**Variable modifications:**

**N-term :** Dimethyl:2H(4)13C(2) (N-term)

**S1 :** Phospho (ST), with neutral losses 0.0000(shown in table), 97.9769

**M9 :** Oxidation (M), with neutral losses 0.0000(shown in table), 63.9983

**K17 :** Dimethyl:2H(4)13C(2) (K)

**Ions Score:** 49 **Expect:** 0.00095

**Matched b ions:** b(2), b(3)-98, b(3), b(4)-98, b(4), b(5), b(5)-98, b(6)++, b(6), b(7), b(8)++, b(8)-98++, b(8), b(8)-98, b(9)++, b(9), b(10)-98++, b(10)++, b(11)++, b(12)++, b(12), b(12)-98++, b(13)++, b(14)++, b(15)-98++, b(15)++, b(16)++, b(16)-98++

**Matched y ions:** y(3), y(4), y(5), y(6), y(7), y(8)++, y(8), y(9)++, y(9), y(10), y(10)++, y(11), y(11)++, y(12)++, y(13)++, y(14)++, y(15)++, y(16)++

**Precursor origin neutral loss:** +

## Peptide No.935

**SQSPLRGGMTEAAQTDK**

**Confirmed sites:** @S:3

**Ambiguous sites:**

MS/MS Fragmentation of **SQSPLRGGMTEAAQTDK**

Found in **BAG3\_MOUSE**, BAG family molecular chaperone regulator 3 OS=Mus musculus GN=Bag3 PE=1 SV=1

Match to Query 4893: 1939.936350 from(647.652726,3+)

Title: Elution from: 24.111 to 24.111 scan no 1389 cid35.00 polarity:+:MA10



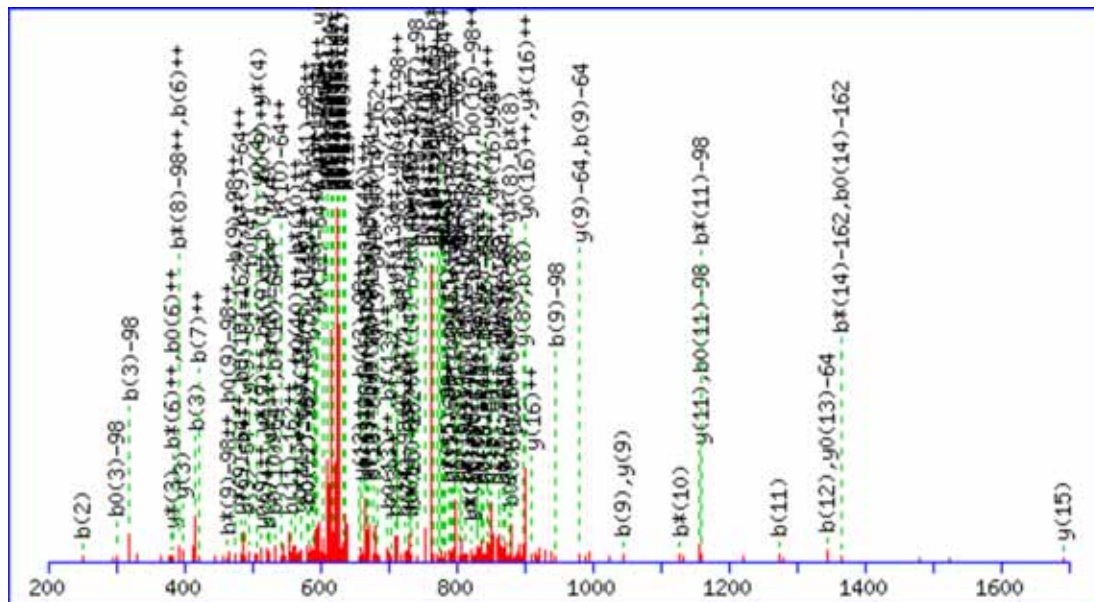

**Monoisotopic mass of neutral peptide Mr(calc):** 1939.9347

**Fixed modifications:** Carbamidomethyl (C) (apply to specified residues or termini only)

**Variable modifications:**

**N-term :** Dimethyl:2H(4)13C(2) (N-term)

**S3 :** Phospho (ST), with neutral losses 0.0000(shown in table), 97.9769

**M9 :** Oxidation (M), with neutral losses 0.0000(shown in table), 63.9983

**K17 :** Dimethyl:2H(4)13C(2) (K)

**Ions Score:** 39 **Expect:** 0.0094

**Matched b ions:** b(2), b(3)-98, b(3), b(4), b(5), b(6)++, b(6), b(7)++, b(7)-98, b(7), b(8)-98, b(8), b(9), b(9)++, b(9)-98++, b(9)-98, b(10)-98++, b(10)++, b(11), b(11)-98++, b(11)++, b(12), b(12)++, b(12)-98++, b(13)++, b(13)-98++, b(14)-98++, b(14)++, b(15)-98++, b(15)++, b(16)++, b(16)-98++

**Matched y ions:** y(3), y(4), y(5), y(6), y(7), y(8), y(9), y(9)++, y(11), y(11)++, y(12)++, y(13)++, y(14)++, y(15), y(15)-98++, y(15)++, y(16)-98++, y(16)++

**Precursor origin neutral loss:** +

## Peptide No.936

**SQSPLRGGMTEAAQTDK**

**Confirmed sites:** @S:1

**Ambiguous sites:**

MS/MS Fragmentation of **SQSPLRGGMTEAAQTDK**

Found in **BAG3\_MOUSE**, BAG family molecular chaperone regulator 3 OS=Mus musculus GN=Bag3  
PE=1 SV=1

Match to Query 6087: 1923.940770 from(642.320866,3+)

Title: Elution from: 31.634 to 31.634 scan no 2448 cid35.00 polarity:+:MA10:m1s

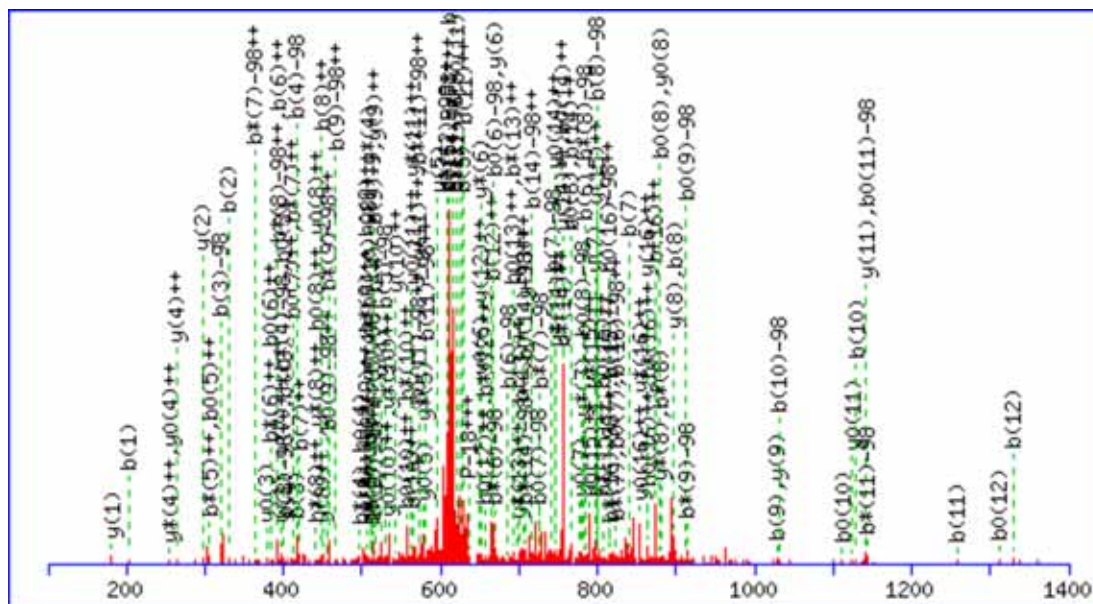

**Monoisotopic mass of neutral peptide Mr(calc):** 1923.9397

**Fixed modifications:** Carbamidomethyl (C) (apply to specified residues or termini only)

**Variable modifications:**

**N-term :** Dimethyl:2H(4)13C(2) (N-term)

**S1 :** Phospho (ST), with neutral losses 0.0000(shown in table), 97.9769

**K17 :** Dimethyl:2H(4)13C(2) (K)

**Ions Score:** 41 **Expect:** 0.006

**Matched b ions:** b(1), b(2), b(3), b(3)-98, b(4)-98, b(4), b(5)-98, b(5), b(6)++, b(6)-98, b(6), b(7)++, b(7)-98, b(7), b(8), b(8)++, b(8)-98++, b(8)-98, b(9), b(9)++, b(9)-98++, b(10), b(10)-98, b(10)++, b(10)-98++, b(11), b(11)++, b(11)-98++, b(12), b(12)-98++, b(12)++, b(13)++, b(14)++, b(14)-98++, b(15)++, b(16)++, b(16)-98++

**Matched y ions:** y(1), y(2), y(3), y(4)++, y(4), y(5), y(6), y(7), y(7)++, y(8), y(8)++, y(9), y(9)++, y(10)++, y(11), y(11)++, y(12)++, y(13)++, y(14)++, y(15)++, y(16)++

**Precursor origin neutral loss:** +

## Peptide No.937

**SQSPSPPLPEDLEK**

**Confirmed sites:** @S:1,@S:5

**Ambiguous sites:**

MS/MS Fragmentation of **SQSPSPPLPEDLEK**

Found in **ACINU\_MOUSE**, Apoptotic chromatin condensation inducer in the nucleus OS=Mus musculus GN=Acin1 PE=1 SV=2

Match to Query 3877: 1835.801240 from(918.907896,2+)

Title: Elution from: 50.001 to 50.001 scan no 4728 cid35.00 polarity:+:MA10

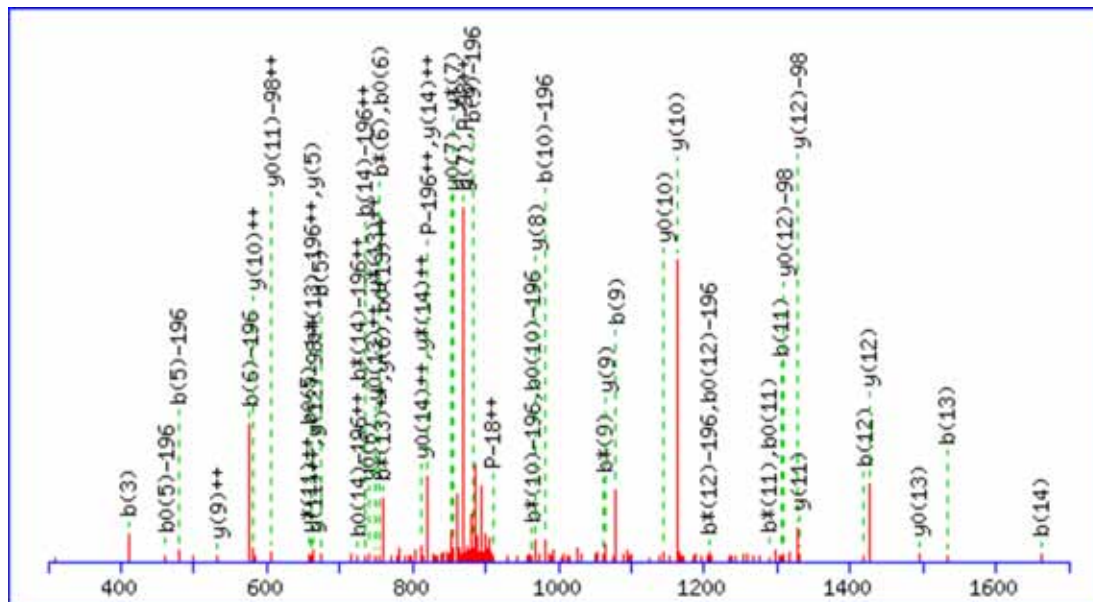

**Monoisotopic mass of neutral peptide Mr(calc):** 1835.7995

**Fixed modifications:** Carbamidomethyl (C) (apply to specified residues or termini only)

**Variable modifications:**

**N-term :** Dimethyl (N-term)

**S1 :** Phospho (ST), with neutral losses 0.0000(shown in table), 97.9769

**S5 :** Phospho (ST), with neutral losses 0.0000(shown in table), 97.9769

**K15 :** Dimethyl (K)

**Ions Score:** 36 **Expect:** 0.0096

**Matched b ions:** b(3), b(5)-98, b(5)-196, b(5), b(6)-196, b(6)-98, b(7), b(7)-98, b(9)-98, b(9), b(9)-196, b(10)-196, b(10)-98, b(11)-98, b(11), b(12), b(12)-98++, b(13), b(14), b(14)-196++

**Matched y ions:** y(5), y(6), y(7), y(8), y(9), y(9)++, y(10), y(10)++, y(11)++, y(11), y(12)-98++, y(12)-98, y(12), y(14)++

**Precursor origin neutral loss:** +

## Peptide No.938

**SQSPSPPLPEDLEK**

**Confirmed sites:** @S:3,@S:5

**Ambiguous sites:**

**MS/MS Fragmentation of SQSPSPPLPEDLEK**

Found in **ACINU\_MOUSE**, Apoptotic chromatin condensation inducer in the nucleus OS=Mus musculus GN=Acin1 PE=1 SV=2

Match to Query 4578: 1835.800552 from(918.907552,2+)

Title: Elution from: 50.310 to 50.310 scan no 4955 cid35.00 polarity:+:MA10

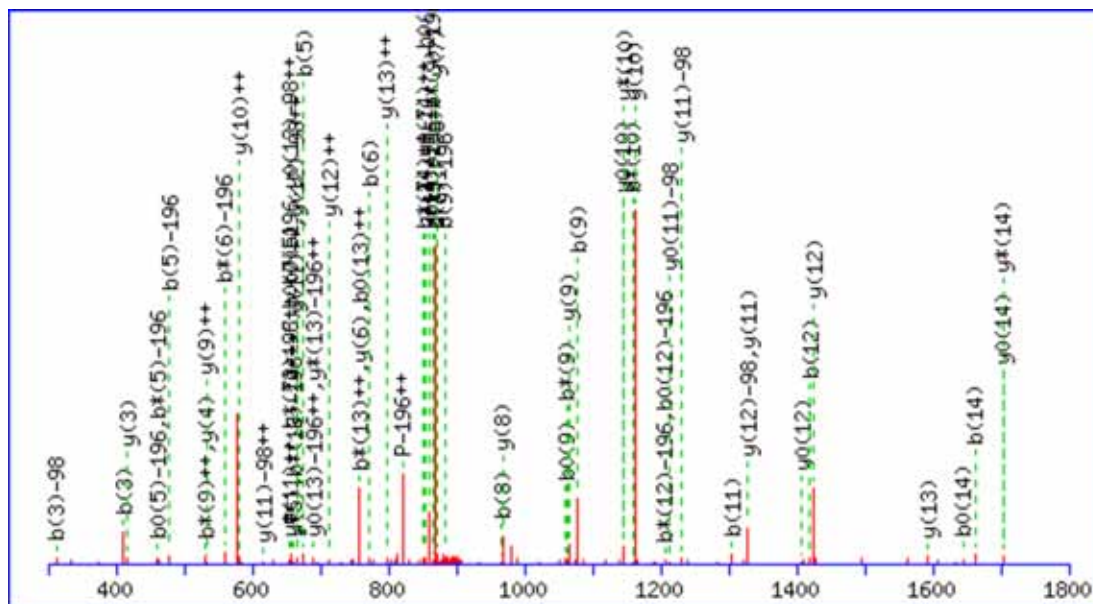

**Monoisotopic mass of neutral peptide Mr(calc):** 1835.7995

**Fixed modifications:** Carbamidomethyl (C) (apply to specified residues or termini only)

**Variable modifications:**

**N-term :** Dimethyl (N-term)

**S3 :** Phospho (ST), with neutral losses 0.0000(shown in table), 97.9769

**S5 :** Phospho (ST), with neutral losses 0.0000(shown in table), 97.9769

**K15 :** Dimethyl (K)

**Ions Score:** 58 **Expect:** 5.6e-005

**Matched b ions:** b(3), b(3)-98, b(5)-196, b(5)-98, b(5), b(6)-98, b(6), b(7), b(8), b(8)-98, b(9), b(9)-98, b(9)-196, b(10)-98, b(11), b(11)-98, b(12), b(12)-98, b(12)-98++, b(14), b(14)-98

**Matched y ions:** y(3), y(4), y(5), y(6), y(7), y(8), y(9), y(9)++, y(10), y(10)++, y(11), y(11)-98, y(11)++, y(11)-98++, y(12)-98, y(12), y(12)-98++, y(12)++, y(13), y(13)++, y(13)-98, y(13)-98++, y(14)-98++, y(14)++

**Precursor origin neutral loss:** +

## Peptide No.939

**SQSPSPPLPEDLEK**

**Confirmed sites:** @S:3,@S:5

**Ambiguous sites:**

MS/MS Fragmentation of **SQSPSPPLPEDLEK**

Found in **ACINU\_MOUSE**, Apoptotic chromatin condensation inducer in the nucleus OS=Mus musculus GN=Acin1 PE=1 SV=2

Match to Query 5341: 1847.865020 from(924.939786,2+)

Title: Elution from: 50.077 to 50.077 scan no 4967 cid35.00 polarity:+:MA10:m1s



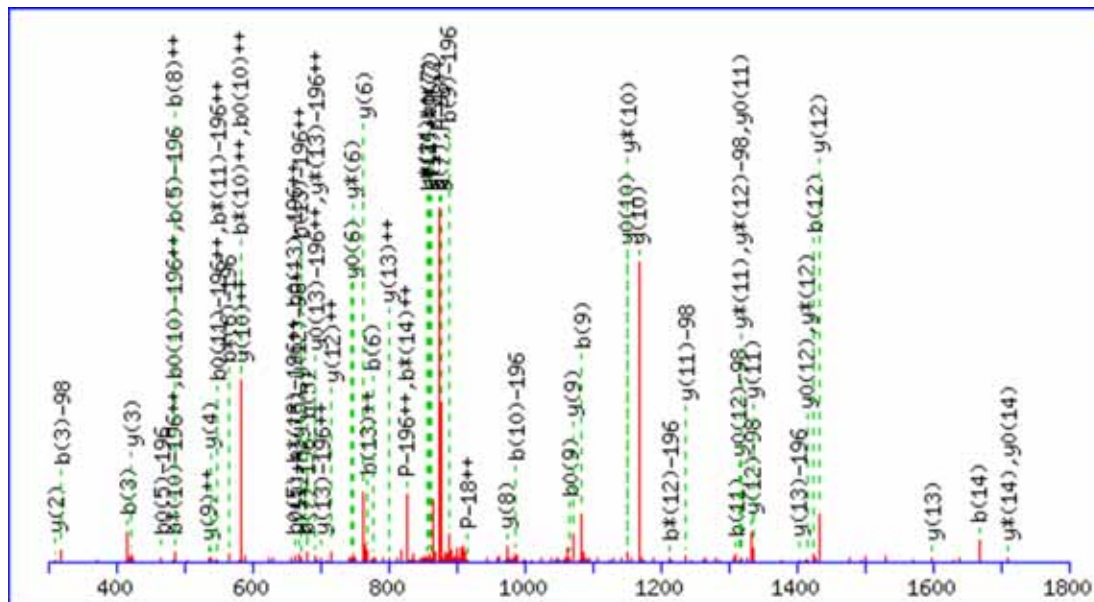

**Monoisotopic mass of neutral peptide Mr(calc):** 1847.8631

**Fixed modifications:** Carbamidomethyl (C) (apply to specified residues or termini only)

**Variable modifications:**

**N-term :** Dimethyl:2H(4)13C(2) (N-term)

**S3 :** Phospho (ST), with neutral losses 97.9769(shown in table), 0.0000

**S5 :** Phospho (ST), with neutral losses 97.9769(shown in table), 0.0000

**K15 :** Dimethyl:2H(4)13C(2) (K)

**Ions Score:** 55 **Expect:** 0.00017

**Matched b ions:** b(3)-98, b(3), b(5)-98, b(5), b(5)-196, b(6)-98, b(6), b(7), b(7)-196, b(7)-98, b(8)++, b(9), b(9)-98, b(9)-196, b(10)-98, b(10)-196, b(11)-98, b(11), b(12), b(12)-98, b(13)++, b(13)-196++, b(14)

**Matched y ions:** y(2), y(3), y(4), y(5), y(6), y(7), y(8), y(9), y(9)++, y(10), y(10)++, y(11)-98, y(11)++, y(11), y(12)-98, y(12), y(12)-98++, y(12)++, y(13), y(13)-98, y(13)-196, y(13)-98++, y(13)-196++, y(13)++, y(14)++

**Precursor origin neutral loss:** +

## Peptide No.940

**SRLSPALSHR**

**Confirmed sites:** @S:1

**Ambiguous sites:**

**MS/MS Fragmentation of SRLSPALSHR**

Found in **MYPN\_MOUSE**, Myopalladin OS=Mus musculus GN=Mypn PE=2 SV=2

Match to Query 1017: 1230.624225 from(411.215351,3+)

Title: Elution from: 23.263 to 23.263 scan no 1254 cid35.00 polarity:+:MA10

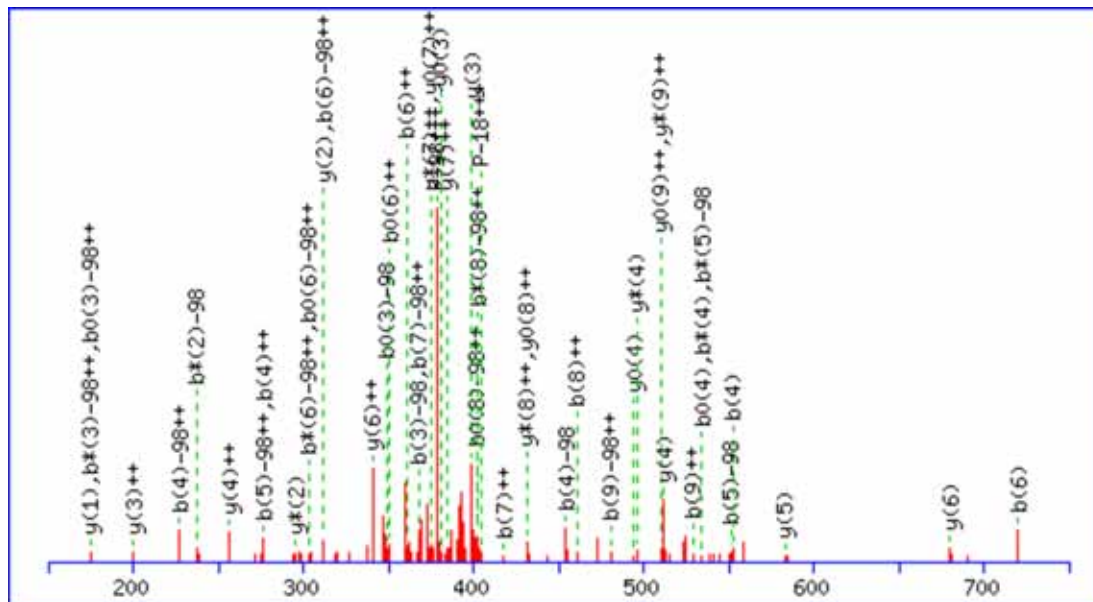

**Monoisotopic mass of neutral peptide Mr(calc):** 1230.6234

**Fixed modifications:** Carbamidomethyl (C) (apply to specified residues or termini only)

**Variable modifications:**

**N-term :** Dimethyl (N-term)

**S1 :** Phospho (ST), with neutral losses 97.9769(shown in table), 0.0000

**Ions Score:** 28 **Expect:** 0.046

**Matched b ions:** b(3)-98, b(4)-98++, b(4), b(4)-98, b(4)++, b(5)-98++, b(5)-98, b(6), b(6)++, b(6)-98++, b(7)-98++, b(7)++, b(8)++, b(9)-98++, b(9)++

**Matched y ions:** y(1), y(2), y(3), y(3)++, y(4), y(4)++, y(5), y(6)++, y(6), y(7)++

**Precursor origin neutral loss:** +

## Peptide No.941

**SRLSPALSHR**

**Confirmed sites:** @S:4

**Ambiguous sites:**

**MS/MS Fragmentation of** **SRLSPALSHR**

Found in **MYPN\_MOUSE**, Myopalladin OS=Mus musculus GN=Mypn PE=2 SV=2

Match to Query 1174: 1230.623715 from(411.215181,3+)

Title: Elution from: 23.322 to 23.322 scan no 1291 cid35.00 polarity:+:MA10



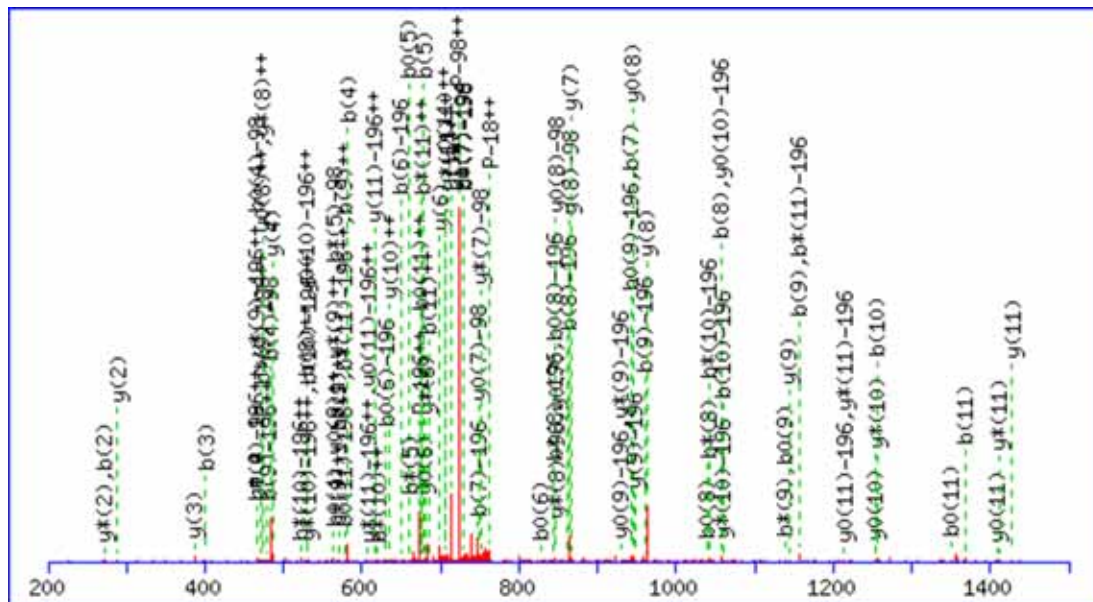

**Monoisotopic mass of neutral peptide Mr(calc):** 1541.7004

**Fixed modifications:** Carbamidomethyl (C) (apply to specified residues or termini only)

**Variable modifications:**

**N-term :** Dimethyl (N-term)

**T4 :** Phospho (ST), with neutral losses 0.0000(shown in table), 97.9769

**S6 :** Phospho (ST), with neutral losses 0.0000(shown in table), 97.9769

**Ions Score:** 35 **Expect:** 0.012

**Matched b ions:** b(2), b(3), b(4)-98, b(4), b(5), b(6)-98, b(6)-196, b(7)-196, b(7), b(7)-98, b(8), b(8)-98, b(8)-98++, b(8)++, b(8)-196, b(9), b(9)-98, b(9)-196++, b(9)-98++, b(9)++, b(9)-196, b(10), b(10)-98, b(10)-196++, b(10)-196, b(11)-98, b(11), b(11)-98++, b(11)++

**Matched y ions:** y(2), y(3), y(4), y(6), y(7), y(8)-98, y(8), y(9), y(9)-98++, y(9)-196, y(9)-98, y(10)++, y(11)++, y(11), y(11)-196++, y(11)-98++

**Precursor origin neutral loss:** +

## Peptide No.943

**SRQTPSPDVVLR**

**Confirmed sites:** @T:4,@S:6

**Ambiguous sites:**

**MS/MS Fragmentation of SRQTPSPDVVLR**

Found in **LIMC1\_MOUSE**, LIM and calponin homology domains-containing protein 1 OS=Mus musculus GN=Limch1 PE=1 SV=2

Match to Query 3553: 1547.732934 from(774.873743,2+)

Title: Elution from: 35.122 to 35.122 scan no 2941 cid35.00 polarity:+:MA10



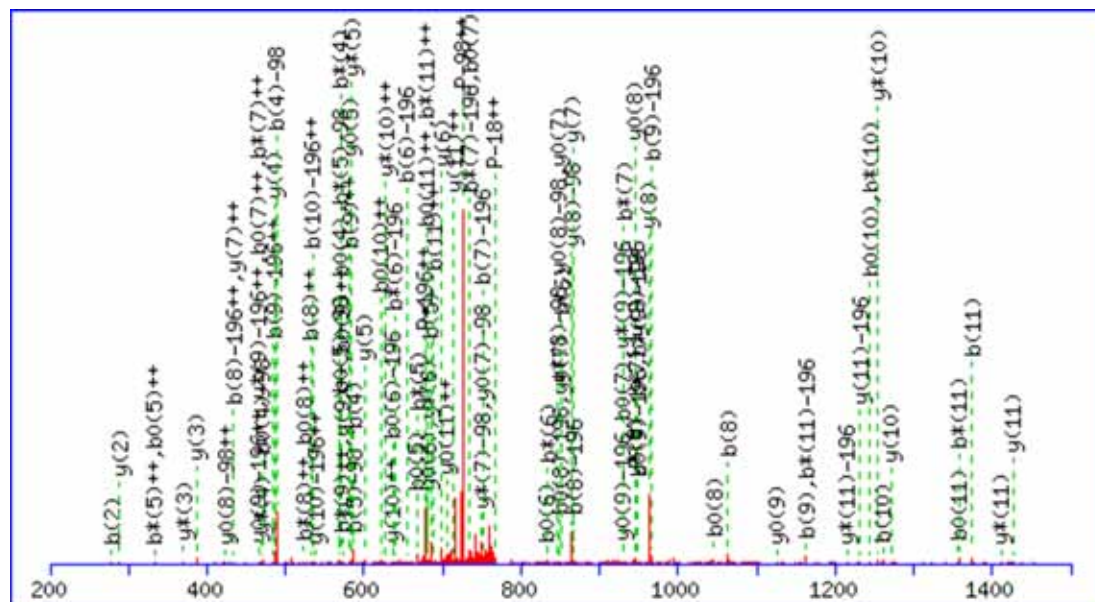

**Monoisotopic mass of neutral peptide Mr(calc): 1547.7322**

**Fixed modifications:** Carbamidomethyl (C) (apply to specified residues or termini only)

**Variable modifications:**

**N-term :** Dimethyl:2H(4)13C(2) (N-term)

**T4 :** Phospho (ST), with neutral losses 0.0000(shown in table), 97.9769

**S6 :** Phospho (ST), with neutral losses 0.0000(shown in table), 97.9769

**Ions Score:** 31 **Expect:** 0.035

**Matched b ions:** b(2), b(4)-98, b(4), b(5)-98, b(5), b(6)-196, b(6)-98, b(6), b(7), b(7)-196, b(8), b(8)-98, b(8)-196++, b(8)-196, b(8)++, b(9), b(9)-98, b(9)-196++, b(9)-98++, b(9)++, b(9)-196, b(10), b(10)-98, b(10)-196++, b(10)-98++, b(11), b(11)-98, b(11)-98++, b(11)++

**Matched y ions:** y(2), y(3), y(4), y(5), y(6), y(7), y(7)++, y(8)-98, y(8), y(9)-98, y(9)-98++, y(9)-196, y(9)++, y(10)-98++, y(10)-196++, y(10)++, y(10)-98, y(10), y(11), y(11)++, y(11)-196

**Precursor origin neutral loss:** +

## Peptide No.944

**SRSPTPPSIAAK**

**Confirmed sites:** @S:1

**Ambiguous sites:**

**MS/MS Fragmentation of SRSPTPPSIAAK**

Found in **TITIN\_MOUSE**, Titin OS=Mus musculus GN=Ttn PE=1 SV=1

Match to Query 2489: 1346.695209 from(449.905679,3+)

Title: Elution from: 26.852 to 26.852 scan no 1785 cid35.00 polarity:+:MA10

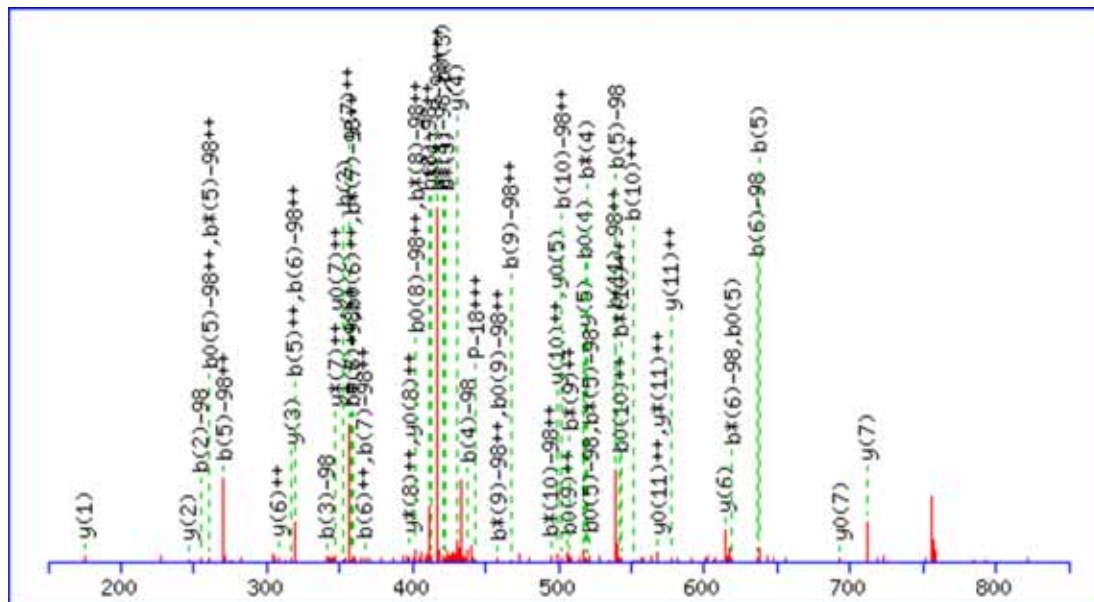

**Monoisotopic mass of neutral peptide Mr(calc):** 1346.6959

**Fixed modifications:** Carbamidomethyl (C) (apply to specified residues or termini only)

**Variable modifications:**

**N-term :** Dimethyl (N-term)

**S1 :** Phospho (ST), with neutral losses 97.9769(shown in table), 0.0000

**K12 :** Dimethyl (K)

**Ions Score:** 37 **Expect:** 0.0075

**Matched b ions:** b(2)-98, b(2), b(3)-98, b(4)-98, b(5)-98++, b(5)-98, b(5)++, b(5), b(6)-98++, b(6)++, b(6)-98, b(7)-98++, b(8)-98++, b(9)-98++, b(10)-98++, b(10)++, b(11)-98++

**Matched y ions:** y(1), y(2), y(3), y(4), y(5), y(6), y(6)++, y(7)++, y(7), y(10)++, y(11)++

**Precursor origin neutral loss:** +

## Peptide No.945

**SRSPTPPSIAAK**

**Confirmed sites:** @S:1,@T:5

**Ambiguous sites:**

**MS/MS Fragmentation of SRSPTPPSIAAK**

Found in **TITIN\_MOUSE**, Titin OS=Mus musculus GN=Ttn PE=1 SV=1

Match to Query 2135: 1426.662843 from(476.561557,3+)

Title: Elution from: 27.951 to 27.951 scan no 2023 cid35.00 polarity:+:MA10

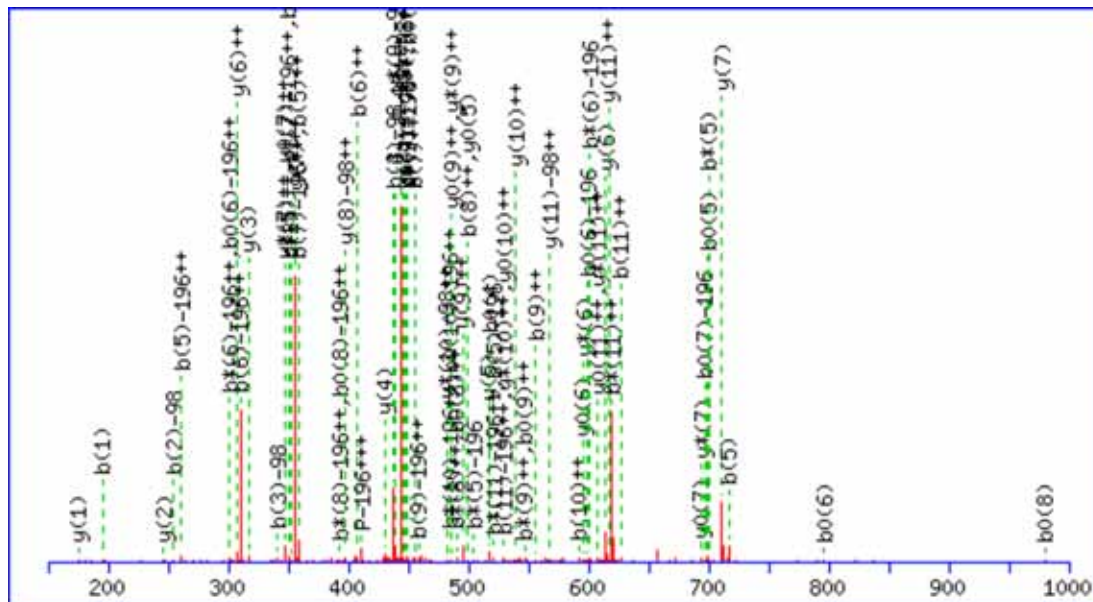

**Monoisotopic mass of neutral peptide Mr(calc):** 1426.6622

**Fixed modifications:** Carbamidomethyl (C) (apply to specified residues or termini only)

**Variable modifications:**

**N-term :** Dimethyl (N-term)

**S1 :** Phospho (ST), with neutral losses 97.9769(shown in table), 0.0000

**T5 :** Phospho (ST), with neutral losses 97.9769(shown in table), 0.0000

**K12 :** Dimethyl (K)

**Ions Score:** 36 **Expect:** 0.0084

**Matched b ions:** b(1), b(2)-98, b(2), b(3), b(3)-98, b(4)-98, b(5)-196++, b(5)-98, b(5)-98++, b(5)++, b(5), b(5)-196, b(6)-196++, b(6)-98++, b(6)-98, b(6)++, b(7)-196++, b(7)++, b(7)-98++, b(8)-98++, b(8)++, b(9)++, b(9)-196++, b(9)-98++, b(10)-98++, b(10)++, b(11)-196++, b(11)++, b(11)-98++

**Matched y ions:** y(1), y(2), y(3), y(4), y(5), y(6), y(6)++, y(7)++, y(7), y(8)-98++, y(8)++, y(9)++, y(9)-98++, y(10)++, y(11)-98++, y(11)++

**Precursor origin neutral loss:** +

## Peptide No.946

**SRSPTPPSIAAK**

**Confirmed sites: @S:3**

**Ambiguous sites:**

**MS/MS Fragmentation of SRSPTPPSIAAK**

Found in **TITIN\_MOUSE**, Titin OS=Mus musculus GN=Ttn PE=1 SV=1

Match to Query 1397: 1346.696004 from(449.905944,3+)

Title: Elution from: 25.105 to 25.105 scan no 1517 cid35.00 polarity:+:MA10

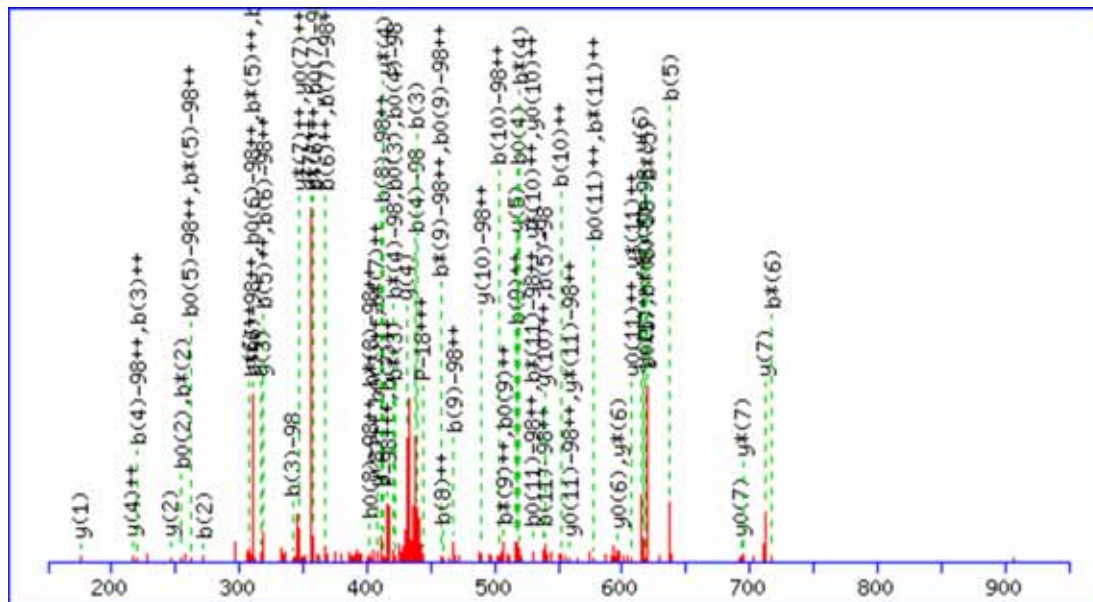

**Monoisotopic mass of neutral peptide Mr(calc):** 1346.6959

**Fixed modifications:** Carbamidomethyl (C) (apply to specified residues or termini only)

**Variable modifications:**

**N-term :** Dimethyl (N-term)

**S3 :** Phospho (ST), with neutral losses 0.0000(shown in table), 97.9769

**K12 :** Dimethyl (K)

**Ions Score:** 37 **Expect:** 0.0083

**Matched b ions:** b(2), b(3)++, b(3), b(3)-98, b(4)-98, b(4)-98++, b(5), b(5)-98, b(5)++, b(6)-98++, b(6)++, b(7)++, b(7)-98++, b(8)-98++, b(8)++, b(9)++, b(9)-98++, b(10)-98++, b(10)++, b(11)-98++

**Matched y ions:** y(1), y(2), y(3), y(4), y(4)++, y(5), y(6), y(6)++, y(7)++, y(7), y(8)++, y(10)++, y(10)-98++, y(11)++

**Precursor origin neutral loss:**

## Peptide No.947

**SRSPTPPSIAAK**

**Confirmed sites:** @S:3,@T:5

**Ambiguous sites:**

**MS/MS Fragmentation of** **SRSPTPPSIAAK**

Found in **TITIN\_MOUSE**, Titin OS=Mus musculus GN=Ttn PE=1 SV=1

Match to Query 1880: 1426.662438 from(476.561422,3+)

Title: Elution from: 27.795 to 27.795 scan no 1823 cid35.00 polarity:+MA10



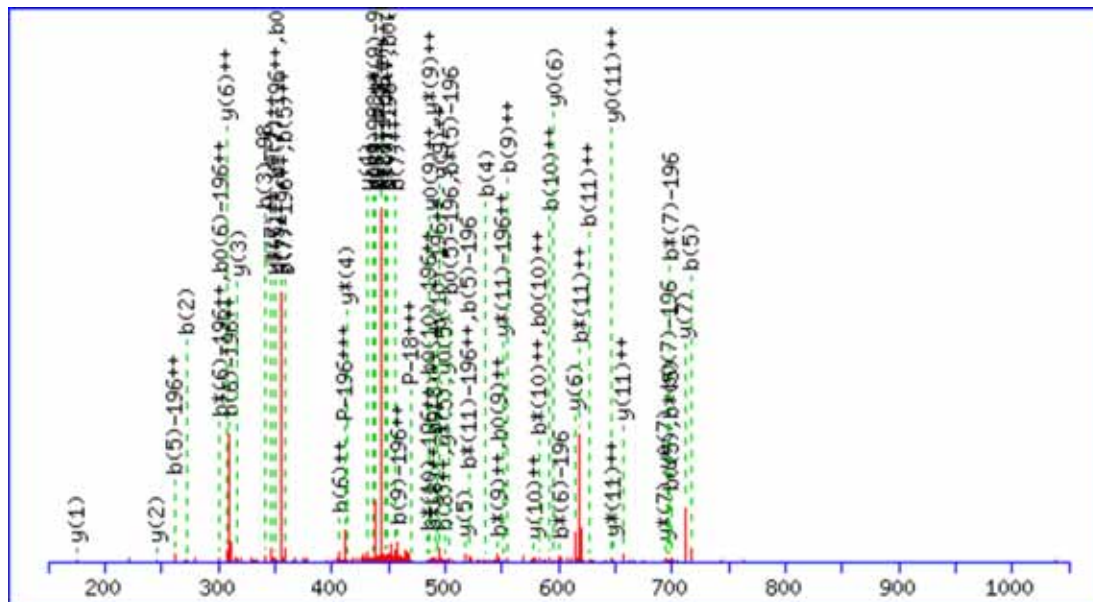

**Monoisotopic mass of neutral peptide Mr(calc):** 1426.6622

**Fixed modifications:** Carbamidomethyl (C) (apply to specified residues or termini only)

**Variable modifications:**

**N-term :** Dimethyl (N-term)

**S3 :** Phospho (ST), with neutral losses 97.9769(shown in table), 0.0000

**T5 :** Phospho (ST), with neutral losses 97.9769(shown in table), 0.0000

**K12 :** Dimethyl (K)

**Ions Score:** 34 **Expect:** 0.015

**Matched b ions:** b(2), b(3)-98, b(3), b(4)-98, b(4), b(5)-196++, b(5)-98, b(5)-98++, b(5), b(5)++, b(5)-196, b(6)-196++, b(6)-98++, b(6)++, b(7)-196++, b(7)++, b(7)-98++, b(8)-98++, b(8)++, b(9)-196++, b(9)++, b(9)-98++, b(10)-196++, b(10)-98++, b(10)++, b(11)-98++, b(11)++

**Matched y ions:** y(1), y(2), y(3), y(4), y(5), y(6), y(6)++, y(7)++, y(7), y(8)++, y(9)++, y(9)-98++, y(10)-98++, y(10)++, y(11)++, y(11)-98++

**Precursor origin neutral loss:** +

## Peptide No.948

**SRSPTPPSIAAK**

**Confirmed sites:** @T:5

**Ambiguous sites:**

**MS/MS Fragmentation of** **SRSPTPPSIAAK**

Found in **TITIN\_MOUSE**, Titin OS=Mus musculus GN=Ttn PE=1 SV=1

Match to Query 1806: 1346.695575 from(449.905801,3+)

Title: Elution from: 26.932 to 26.932 scan no 1885 cid35.00 polarity:+:MA10



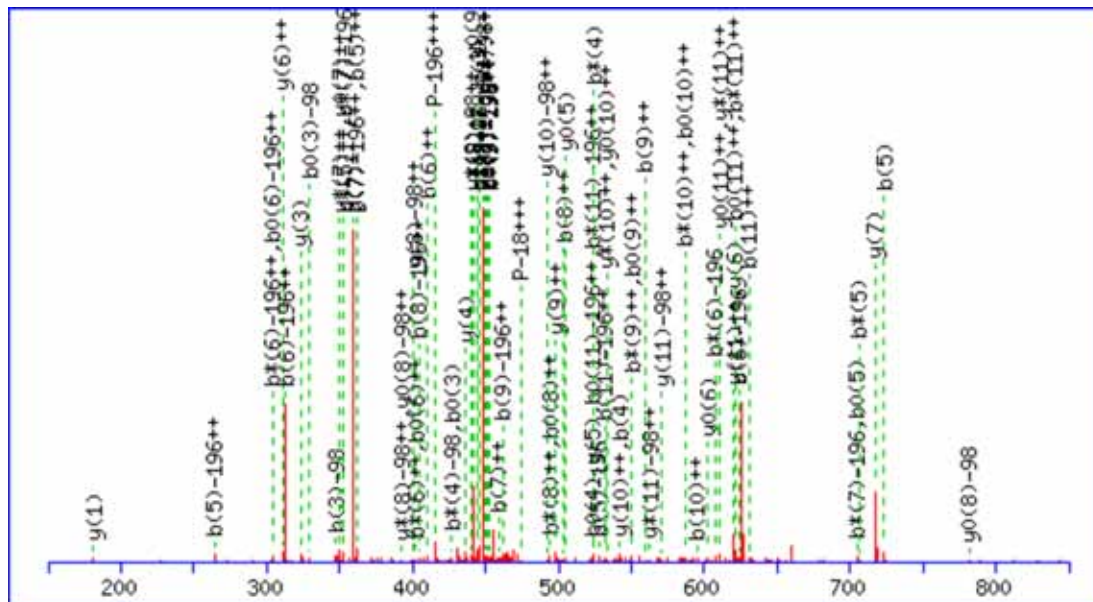

**Monoisotopic mass of neutral peptide Mr(calc):** 1438.7258

**Fixed modifications:** Carbamidomethyl (C) (apply to specified residues or termini only)

**Variable modifications:**

**N-term :** Dimethyl:2H(4)13C(2) (N-term)

**S1 :** Phospho (ST), with neutral losses 0.0000(shown in table), 97.9769

**T5 :** Phospho (ST), with neutral losses 0.0000(shown in table), 97.9769

**K12 :** Dimethyl:2H(4)13C(2) (K)

**Ions Score:** 35 **Expect:** 0.015

**Matched b ions:** b(3), b(3)-98, b(4), b(4)-98, b(5)-196++, b(5)-98, b(5)-98++, b(5)++, b(5), b(5)-196, b(6)-196++, b(6)-98++, b(6)++, b(6)-196, b(7)-196++, b(7)-98++, b(7)++, b(8)-196++, b(8)-98++, b(8)++, b(9)-196++, b(9)++, b(10)++, b(10)-98++, b(11)-196++, b(11)++

**Matched y ions:** y(1), y(3), y(4), y(5), y(6), y(6)++, y(7)++, y(7), y(8)++, y(8)-98++, y(9)++, y(9)-98++, y(10)++, y(10)-98++, y(11)++, y(11)-98++

**Precursor origin neutral loss:** +

## Peptide No.950

**SRSPTPPSIAAK**

**Confirmed sites: @S:3**

**Ambiguous sites:**

**MS/MS Fragmentation of SRSPTPPSIAAK**

Found in **TITIN\_MOUSE**, Titin OS=Mus musculus GN=Ttn PE=1 SV=1

Match to Query 1312: 1358.758896 from(453.926908,3+)

Title: Elution from: 26.981 to 26.981 scan no 1713 cid35.00 polarity:+:MA10





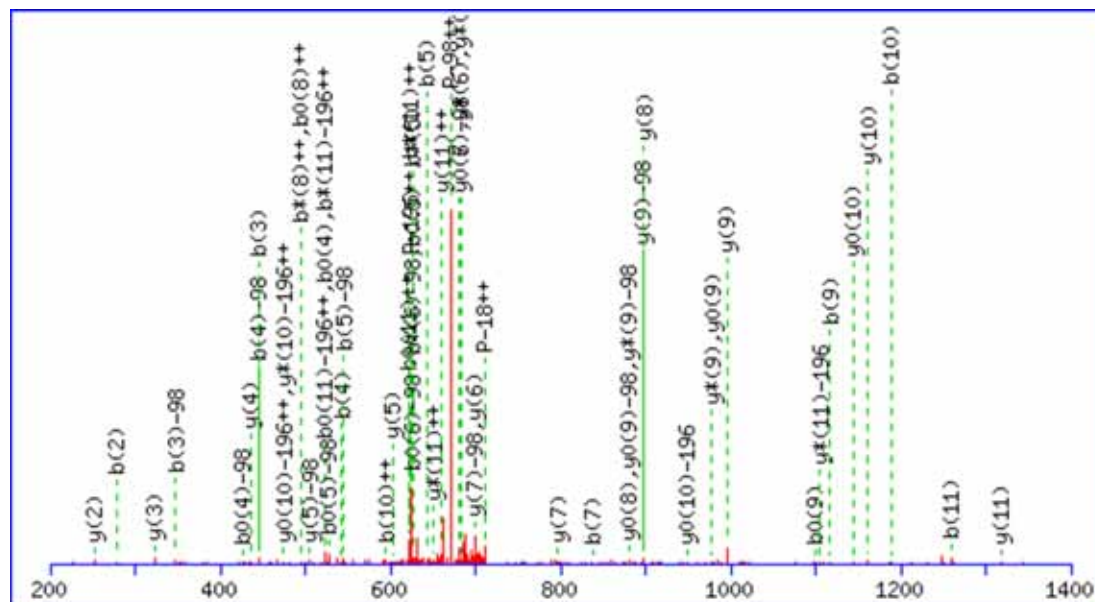

**Monoisotopic mass of neutral peptide Mr(calc):** 1438.7258

**Fixed modifications:** Carbamidomethyl (C) (apply to specified residues or termini only)

**Variable modifications:**

**N-term :** Dimethyl:2H(4)13C(2) (N-term)

**S3 :** Phospho (ST), with neutral losses 0.0000(shown in table), 97.9769

**S8 :** Phospho (ST), with neutral losses 0.0000(shown in table), 97.9769

**K12 :** Dimethyl:2H(4)13C(2) (K)

**Ions Score:** 35 **Expect:** 0.014

**Matched b ions:** b(2), b(3)-98, b(3), b(4)-98, b(4), b(5)-98, b(5), b(7), b(8)-98, b(9), b(9)-98++, b(10), b(10)-98++, b(10)++, b(11)-98, b(11)

**Matched y ions:** y(2), y(3), y(4), y(5)-98, y(5), y(6), y(7)-98, y(7), y(8), y(9)-98, y(9), y(10), y(11), y(11)-98++, y(11)++

**Precursor origin neutral loss:** +

## Peptide No.952

**SRSPTPPSIAAK**

**Confirmed sites:** @S:3,@T:5

**Ambiguous sites:**

**MS/MS Fragmentation of SRSPTPPSIAAK**

Found in **TITIN\_MOUSE**, Titin OS=Mus musculus GN=Ttn PE=1 SV=1

Match to Query 1980: 1438.725060 from(480.582296,3+)

Title: Elution from: 27.668 to 27.668 scan no 1835 cid35.00 polarity:+:MA10

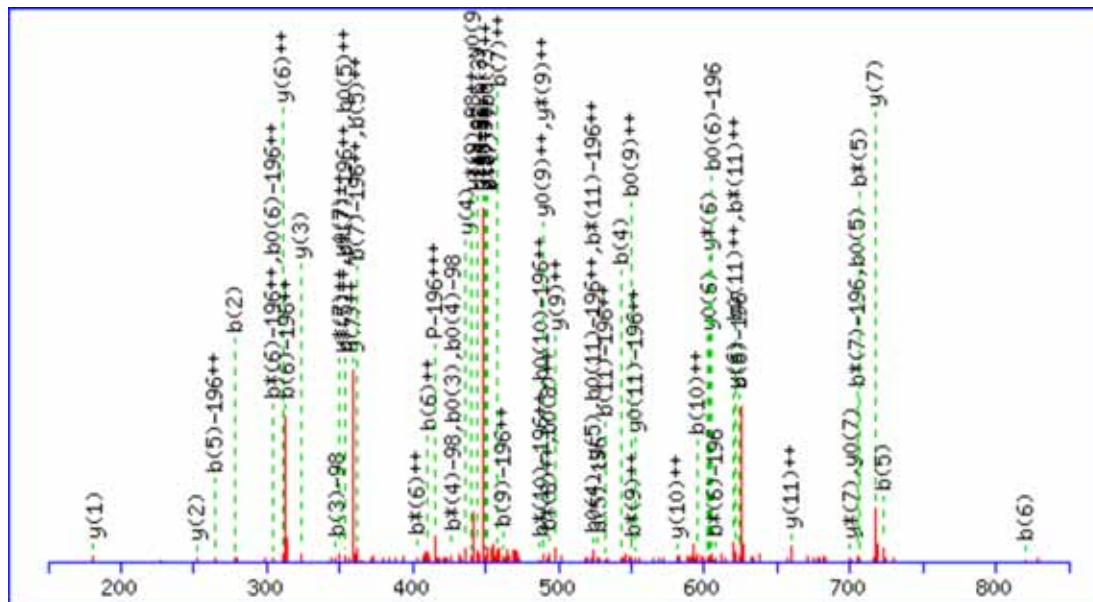

**Monoisotopic mass of neutral peptide Mr(calc):** 1438.7258

**Fixed modifications:** Carbamidomethyl (C) (apply to specified residues or termini only)

**Variable modifications:**

**N-term :** Dimethyl:2H(4)13C(2) (N-term)

**S3 :** Phospho (ST), with neutral losses 0.0000(shown in table), 97.9769

**T5 :** Phospho (ST), with neutral losses 0.0000(shown in table), 97.9769

**K12 :** Dimethyl:2H(4)13C(2) (K)

**Ions Score:** 32 **Expect:** 0.025

**Matched b ions:** b(2), b(3)-98, b(3), b(4), b(4)-98, b(5)-98, b(5)-196++, b(5)-98++, b(5), b(5)++, b(5)-196, b(6)-196++, b(6), b(6)-98, b(6)-98++, b(6)++, b(6)-196, b(7)-196++, b(7)-98++, b(7)++, b(8)-98++, b(9)-196++, b(10)-98++, b(10)++, b(11)-196++, b(11)-98++

**Matched y ions:** y(1), y(2), y(3), y(4), y(5), y(6), y(6)++, y(7)++, y(7), y(8)++, y(9)++, y(9)-98++, y(10)-98++, y(10)++, y(11)++, y(11)-98++

**Precursor origin neutral loss:** +

## Peptide No.953

**SRSPVDSPVPASMFAPESPSPAAR**

**Confirmed sites:** @S:3,@S:19

**Ambiguous sites:**

**MS/MS Fragmentation of SRSPVDSPVPASMFAPESPSPAAR**

Found in **GTPB1\_MOUSE**, GTP-binding protein 1 OS=Mus musculus GN=Gtpbp1 PE=1 SV=2

Match to Query 6388: 2700.167982 from(901.063270,3+)

Title: Elution from: 43.796 to 43.796 scan no 3867 cid35.00 polarity:+:MA10:m1s

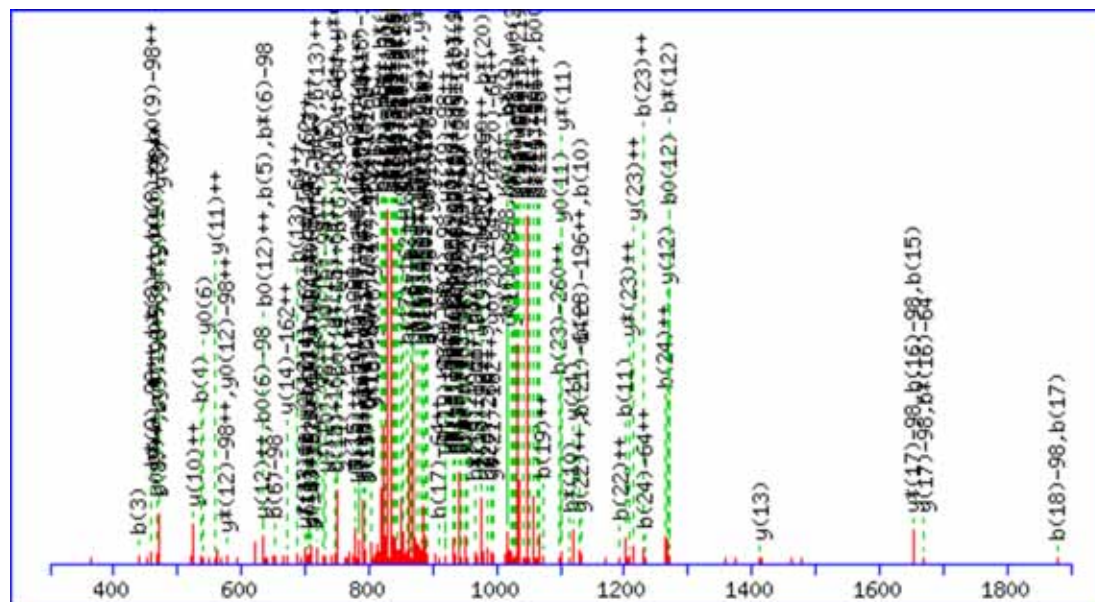

**Monoisotopic mass of neutral peptide Mr(calc):** 2700.1656

**Fixed modifications:** Carbamidomethyl (C) (apply to specified residues or termini only)

**Variable modifications:**

**N-term :** Dimethyl (N-term)

**S3 :** Phospho (ST), with neutral losses 0.0000(shown in table), 97.9769

**M13 :** Oxidation (M), with neutral losses 0.0000(shown in table), 63.9983

**S19 :** Phospho (ST), with neutral losses 0.0000(shown in table), 97.9769

**Ions Score:** 67 **Expect:** 1.4e-005

**Matched b ions:** b(3), b(4), b(5), b(6), b(6)-98, b(7), b(8)++, b(8)-98, b(8), b(9), b(9)-98++, b(9)-98, b(10), b(11), b(13)++, b(14)++, b(15)++, b(15), b(15)-98++, b(16)-98++, b(16)-98, b(16)++, b(17), b(17)++, b(17)-98++, b(18)-98, b(18)-98++, b(19)++, b(19)-98++, b(20)-98++, b(21)-196++, b(22)++, b(23)++, b(23)-196++, b(24)++, b(24)-98++

**Matched y ions:** y(5), y(8), y(9), y(9)-98, y(10), y(10)++, y(10)-98, y(11), y(11)++, y(11)-98, y(12), y(12)++, y(13), y(13)++, y(14)++, y(14)-98++, y(15)++, y(16)++, y(16)-98++, y(17)-98, y(17)-98++, y(17)++, y(18)++, y(18)-98++, y(19)++, y(20)++, y(21)-98++, y(22)++, y(23)++

**Precursor origin neutral loss:** +

## Peptide No.954

**SRSPVDSPVPASMFAPESPSPAAR**

**Confirmed sites:** @S:3,@S:20

**Ambiguous sites:**

MS/MS Fragmentation of **SRSPVDSPVPASMFAPESPSPAAR**

Found in **GTPB1\_MOUSE**, GTP-binding protein 1 OS=Mus musculus GN=Gtpbp1 PE=1 SV=2

Match to Query 7087: 2700.169734 from(901.063854,3+)

Title: Elution from: 44.019 to 44.019 scan no 3974 cid35.00 polarity:+:MA10:m1s

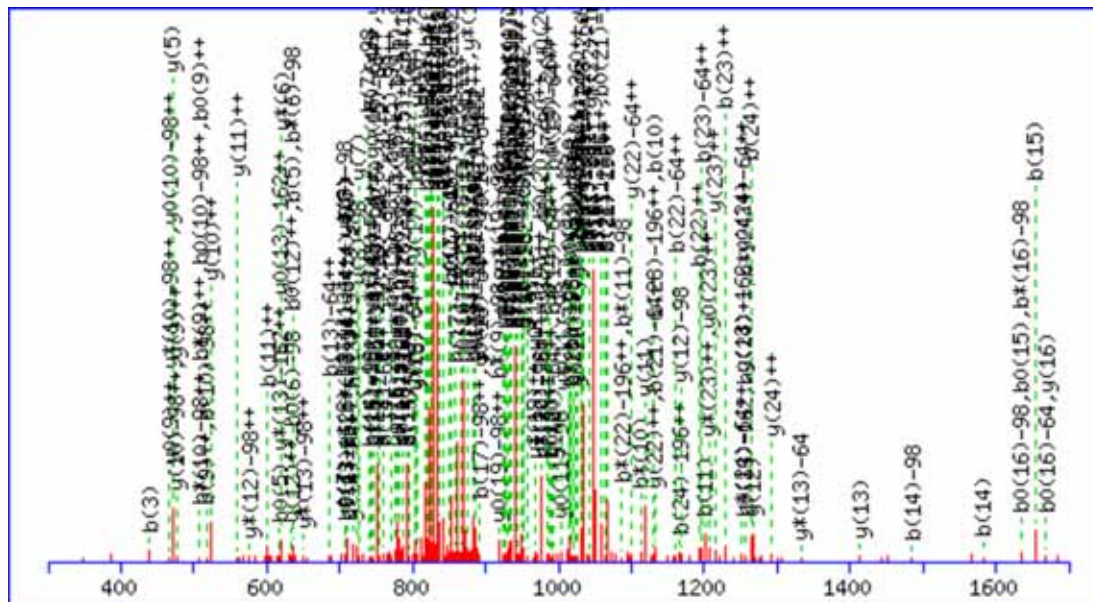

**Monoisotopic mass of neutral peptide Mr(calc):** 2700.1656

**Fixed modifications:** Carbamidomethyl (C) (apply to specified residues or termini only)

**Variable modifications:**

**N-term :** Dimethyl (N-term)

**S3 :** Phospho (ST), with neutral losses 0.0000(shown in table), 97.9769

**M13 :** Oxidation (M), with neutral losses 0.0000(shown in table), 63.9983

**S20 :** Phospho (ST), with neutral losses 0.0000(shown in table), 97.9769

**Ions Score:** 86 **Expect:** 2.1e-007

**Matched b ions:** b(3), b(5), b(6), b(7)-98, b(7), b(8)-98, b(8), b(9), b(9)++, b(9)-98, b(10)-98, b(10)-98++, b(10), b(11), b(11)++, b(13)++, b(14)-98, b(14), b(14)++, b(14)-98++, b(15)++, b(15), b(15)-98++, b(16)-98++, b(16)++, b(17)++, b(17)-98++, b(18)-98++, b(18)++, b(19)++, b(19)-98++, b(20)-98++, b(20)-196++, b(21)-196++, b(22)++, b(23)++, b(23)-196++, b(23)-98++, b(24)++, b(24)-98++, b(24)-196++

**Matched y ions:** y(5), y(7), y(8)-98, y(8), y(9)++, y(9), y(10), y(10)++, y(10)-98++, y(10)-98, y(11), y(11)++, y(11)-98, y(12), y(12)-98, y(12)++, y(13), y(13)++, y(14)++, y(15)++, y(16)++, y(16), y(16)-98++, y(17)-98++, y(17)++, y(18)-98++, y(18)++, y(19)++, y(19)-98++, y(20)++, y(21)-98++, y(22)++, y(23)++, y(23)-98++, y(24)++

**Precursor origin neutral loss:** +

## Peptide No.955

**SRSPVDSPVPASMFAPESPSPAAR**

**Confirmed sites:** @S:3,@S:19

**Ambiguous sites:**

**MS/MS Fragmentation of SRSPVDSPVPASMFAPESPSPAAR**

Found in **GTPB1\_MOUSE**, GTP-binding protein 1 OS=Mus musculus GN=Gtpbp1 PE=1 SV=2

Match to Query 8117: 2684.173020 from(895.731616,3+)

Title: Elution from: 52.058 to 52.058 scan no 5152 cid35.00 polarity:+:MA10:m1s



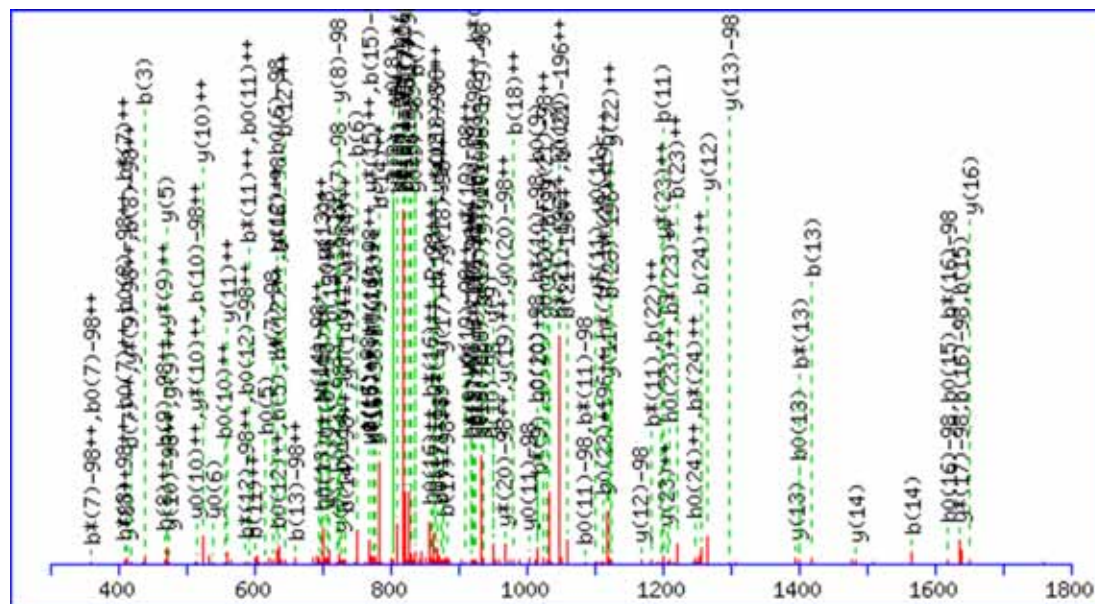

**Monoisotopic mass of neutral peptide Mr(calc):** 2684.1707

**Fixed modifications:** Carbamidomethyl (C) (apply to specified residues or termini only)

**Variable modifications:**

**N-term :** Dimethyl (N-term)

**S3 :** Phospho (ST), with neutral losses 0.0000(shown in table), 97.9769

**S19 :** Phospho (ST), with neutral losses 0.0000(shown in table), 97.9769

**Ions Score:** 69 **Expect:** 9.4e-006

**Matched b ions:** b(3), b(5), b(6), b(7)++, b(7), b(8), b(8)-98++, b(8)++, b(9), b(9)-98++, b(9)-98, b(10)-98++, b(11), b(11)++, b(12)++, b(13), b(13)++, b(13)-98++, b(14)++, b(14), b(14)-98++, b(15)++, b(15), b(15)-98++, b(16)-98++, b(16)-98, b(16)++, b(17)++, b(17)-98++, b(18)-98++, b(18)++, b(19)-98++, b(20)-98++, b(21)-196++, b(22)++, b(23)++, b(23)-196++, b(24)++, b(24)-98++

**Matched y ions:** y(5), y(7)-98, y(7), y(8)++, y(8), y(8)-98, y(9), y(9)++, y(10)++, y(10), y(10)-98, y(10)-98++, y(11), y(11)++, y(12), y(12)++, y(12)-98, y(13), y(13)-98, y(13)++, y(14), y(14)-98++, y(15)-98++, y(15)++, y(16)++, y(16), y(16)-98++, y(17)-98++, y(17)++, y(18)-98++, y(18)++, y(19)++, y(19)-98++, y(20)++, y(21)-98++, y(22)++, y(23)++

**Precursor origin neutral loss:**

## Peptide No.956

**SRSPVDSPVASMFAPEPSSPGAAR**

**Confirmed sites:** @S:3,@S:20

**Ambiguous sites:**

MS/MS Fragmentation of **SRSPVDSPVASMFAPEPSSPGAAR**

Found in **GTPB1\_MOUSE**, GTP-binding protein 1 OS=Mus musculus GN=Gtpbp1 PE=1 SV=2

Match to Query 7071: 2684.173269 from(895.731699,3+)

Title: Elution from: 51.947 to 51.947 scan no 4908 cid35.00 polarity:+:MA10:m1s

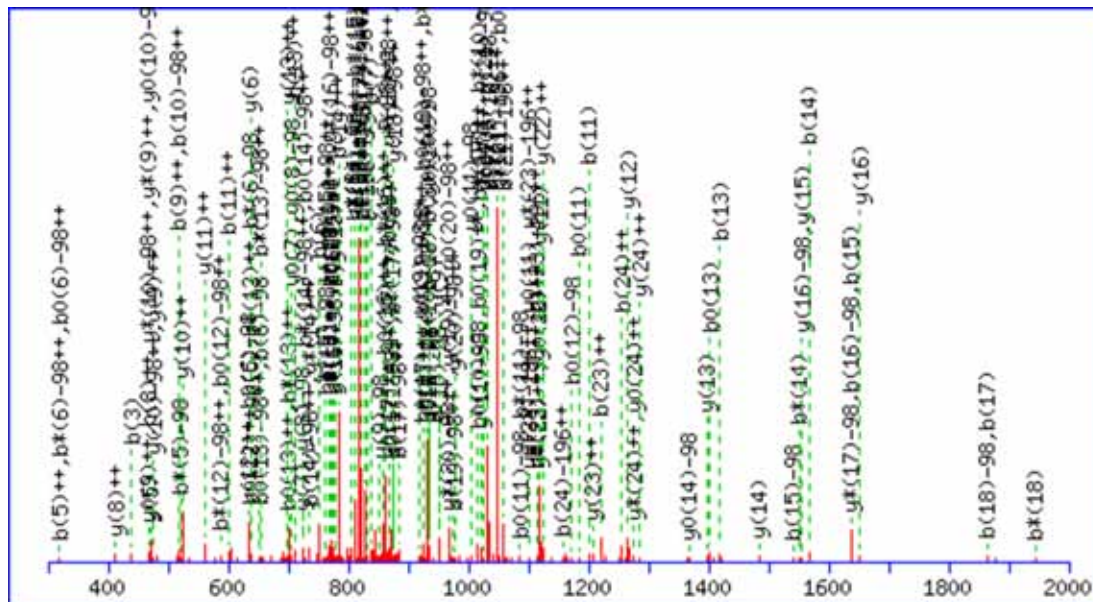

**Monoisotopic mass of neutral peptide Mr(calc):** 2684.1707

**Fixed modifications:** Carbamidomethyl (C) (apply to specified residues or termini only)

**Variable modifications:**

**N-term :** Dimethyl (N-term)

**S3 :** Phospho (ST), with neutral losses 0.0000(shown in table), 97.9769

**S20 :** Phospho (ST), with neutral losses 0.0000(shown in table), 97.9769

**Ions Score:** 79 **Expect:** 1e-006

**Matched b ions:** b(3), b(5), b(5)++, b(6), b(6)-98, b(7), b(8)++, b(8), b(9)++, b(9), b(10)-98++, b(10)-98, b(11)++, b(11), b(13), b(13)++, b(14)++, b(14), b(14)-98++, b(15)++, b(15), b(15)-98, b(15)-98++, b(16)-98++, b(16)-98, b(16)++, b(17)++, b(17), b(17)-98++, b(18)-98++, b(18)-98, b(19)-98++, b(20)-98++, b(21)-196++, b(23)++, b(23)-98++, b(24)++, b(24)-98++, b(24)-196++

**Matched y ions:** y(5), y(6), y(7), y(8)++, y(8), y(8)-98, y(9)++, y(9), y(9)-98, y(10)++, y(10), y(10)-98, y(10)-98++, y(11), y(11)++, y(11)-98, y(12), y(12)++, y(13), y(13)++, y(14), y(15), y(15)++, y(16), y(16)++, y(16)-98, y(16)-98++, y(17)-98++, y(18)++, y(18)-98++, y(19)++, y(19)-98++, y(20)-98++, y(20)++, y(21)-98++, y(22)++, y(23)++, y(23)-98++, y(24)++

**Precursor origin neutral loss:** +

## Peptide No.957

**SRSPVDSPVPASMFAPESPSPAAR**

**Confirmed sites:** @S:3,@S:20

**Ambiguous sites:**

**MS/MS Fragmentation of SRSPVDSPVPASMFAPESPSPAAR**

Found in **GTPB1\_MOUSE**, GTP-binding protein 1 OS=Mus musculus GN=Gtpbp1 PE=1 SV=2

Match to Query 7235: 2706.200805 from(903.074211,3+)

Title: Elution from: 43.924 to 43.924 scan no 4006 cid35.00 polarity:+:MA10:m1s

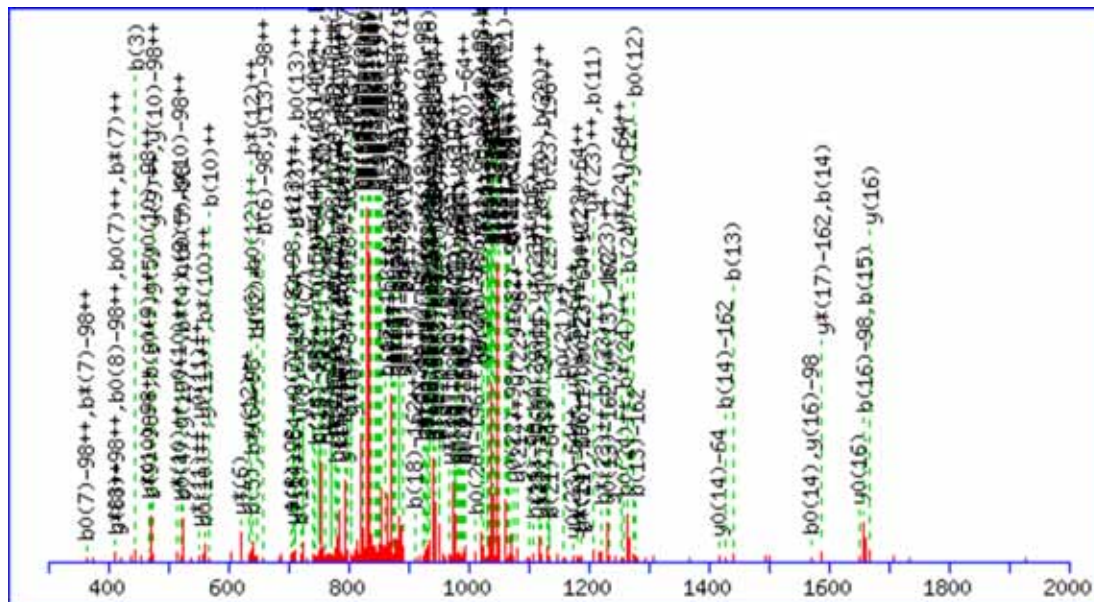

**Monoisotopic mass of neutral peptide Mr(calc):** 2706.1974

**Fixed modifications:** Carbamidomethyl (C) (apply to specified residues or termini only)

**Variable modifications:**

**N-term :** Dimethyl:2H(4)13C(2) (N-term)

**S3 :** Phospho (ST), with neutral losses 0.0000(shown in table), 97.9769

**M13 :** Oxidation (M), with neutral losses 0.0000(shown in table), 63.9983

**S20 :** Phospho (ST), with neutral losses 0.0000(shown in table), 97.9769

**Ions Score:** 66 **Expect:** 2e-005

**Matched b ions:** b(3), b(5), b(6), b(6)-98, b(7)-98, b(7), b(8)++, b(8), b(9)-98++, b(9), b(9)++, b(9)-98, b(10)-98++, b(10)++, b(10)-98, b(11), b(11)-98, b(12)++, b(13), b(13)++, b(14), b(14)++, b(14)-98++, b(15)++, b(15), b(15)-98++, b(16)-98++, b(16)-98, b(16)++, b(17)++, b(18)-98++, b(19)-98++, b(19)++, b(20)-98++, b(20)++, b(20)-196++, b(21)-98++, b(21)-196++, b(22)-98++, b(23)++, b(23)-98++, b(23)-196++, b(24)++, b(24)-98++

**Matched y ions:** y(5), y(6), y(7), y(8)-98, y(8)++, y(8), y(9)++, y(9)-98, y(9), y(10), y(10)++, y(10)-98++, y(10)-98, y(11), y(11)++, y(11)-98, y(12), y(12)++, y(13)++, y(13)-98++, y(14)++, y(15)++, y(16), y(16)++, y(16)-98, y(16)-98++, y(17)-98++, y(17)++, y(18)-98++, y(18)++, y(19)++, y(19)-98++, y(20)++, y(21)++, y(21)-98++, y(22)++, y(22)-98++, y(23)-196++, y(24)-98++

**Precursor origin neutral loss:** +

## Peptide No.958

**SRSPVDSPVPASMFAPESPSPAAR**

**Confirmed sites:** @S:3,@S:20

**Ambiguous sites:**

**MS/MS Fragmentation of SRSPVDSPVPASMFAPESPSPAAR**

Found in **GTPB1\_MOUSE**, GTP-binding protein 1 OS=Mus musculus GN=Gtpbp1 PE=1 SV=2

Match to Query 7035: 2690.204850 from(897.742226,3+)

Title: Elution from: 51.920 to 51.920 scan no 4952 cid35.00 polarity:+:MA10:m1s











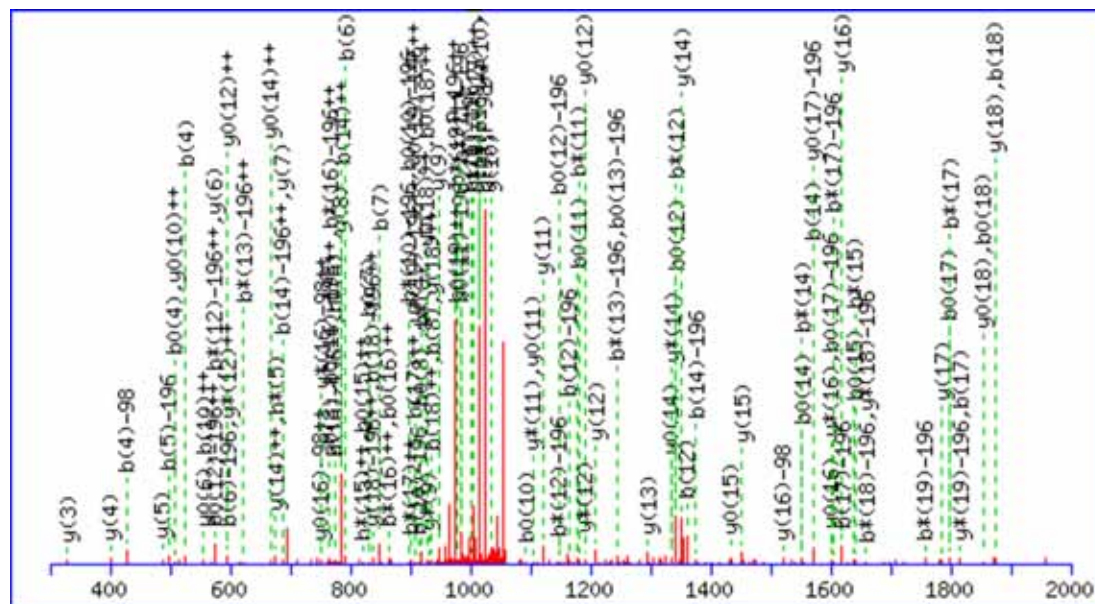

**Monoisotopic mass of neutral peptide Mr(calc):** 2142.8984

**Fixed modifications:** Carbamidomethyl (C) (apply to specified residues or termini only)

**Variable modifications:**

**N-term :** Dimethyl (N-term)

**S4 :** Phospho (ST), with neutral losses 0.0000(shown in table), 97.9769

**S5 :** Phospho (ST), with neutral losses 0.0000(shown in table), 97.9769

**Ions Score:** 84 **Expect:** 1.7e-007

**Matched b ions:** b(4)-98, b(4), b(5)-196, b(5)-98, b(6)-98, b(6)-196, b(6), b(7), b(7)-98, b(8)-98, b(8), b(9), b(10)++, b(10)-196, b(11)-196, b(12), b(12)-98, b(12)-196, b(13)-98, b(14)++, b(14), b(14)-196++, b(14)-98, b(14)-196, b(15)-98++, b(16)-196++, b(17), b(17)-196, b(17)++, b(18), b(18)-196++, b(18)++, b(19)-98, b(19)-98++

**Matched y ions:** y(3), y(4), y(5), y(6), y(7), y(8), y(9), y(10), y(11), y(12), y(13), y(14), y(14)++, y(15), y(16), y(16)-98, y(17), y(17)-98, y(18), y(18)-196++, y(18)++, y(19)++, y(19)-98++

**Precursor origin neutral loss:** +

## Peptide No.962

**SRSSSVGSSSSYPISSAGPR**

**Confirmed sites:** @S:4,@S:5,@S:8

**Ambiguous sites:**

MS/MS Fragmentation of **SRSSSVGSSSSYPISSAGPR**

Found in **PLEC\_MOUSE**, Plectin OS=Mus musculus GN=Plec PE=1 SV=2

Match to Query 5682: 2222.864666 from(1112.439609,2+)

Title: Elution from: 38.459 to 38.459 scan no 3244 cid35.00 polarity:+:MA10:m1s







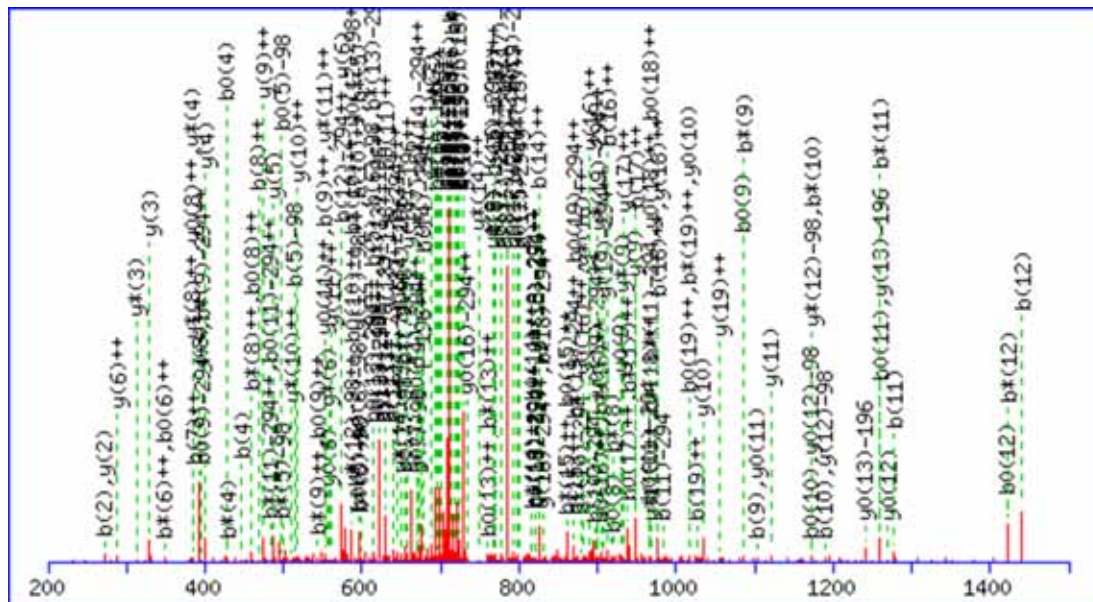

**Monoisotopic mass of neutral peptide Mr(calc):** 2222.8647

**Fixed modifications:** Carbamidomethyl (C) (apply to specified residues or termini only)

**Variable modifications:**

**N-term :** Dimethyl (N-term)

**S5 :** Phospho (ST), with neutral losses 97.9769(shown in table), 0.0000

**S8 :** Phospho (ST), with neutral losses 97.9769(shown in table), 0.0000

**S9 :** Phospho (ST), with neutral losses 97.9769(shown in table), 0.0000

**Ions Score:** 62 **Expect:** 2e-005

**Matched b ions:** b(2), b(4), b(5)-98, b(5), b(6), b(6)-98, b(7)++, b(7), b(7)-98, b(8)++, b(9)-98++, b(9), b(9)-98, b(9)++, b(9)-196, b(10), b(10)++, b(10)-196++, b(10)-98++, b(10)-294, b(10)-196, b(11), b(11)-98++, b(11)++, b(11)-294, b(12), b(12)-294++, b(12)-98, b(12)++, b(12)-196++, b(12)-98++, b(13)-98, b(13)-98++, b(13)++, b(13)-294++, b(13)-196++, b(14)++, b(14)-98++, b(14)-294++, b(14)-196++, b(15)++, b(15)-294++, b(15)-98++, b(16)++, b(16)-294++, b(16)-98++, b(17)++, b(17)-294++, b(17)-196++, b(17)-98++, b(18)++, b(18)-98++, b(18)-294++, b(18)-196++, b(19)-98++, b(19)-196++, b(19)++

**Matched y ions:** y(2), y(3), y(4), y(5), y(6), y(6)++, y(7), y(8)++, y(8), y(9)++, y(9), y(10), y(10)++, y(11), y(11)++, y(12)-98, y(12)-98++, y(12)++, y(13)-196, y(13)-196++, y(13)-98++, y(13)++, y(14)-196++, y(14)-98++, y(15)-196++, y(16)-196++, y(16)++, y(16)-98++, y(17)-294++, y(17)-196++, y(17)-98++, y(17)++, y(18)++, y(18)-98++, y(18)-294++, y(18)-196++, y(19)-98++, y(19)++, y(19)-294++

**Precursor origin neutral loss:** +

## Peptide No.964

**SRSSSVGSSSSYPISSAGPR**

**Confirmed sites:** @S:8,@S:9

**Ambiguous sites:**

MS/MS Fragmentation of **SRSSSVGSSSSYPISSAGPR**

Found in **PLEC\_MOUSE**, Plectin OS=Mus musculus GN=Plec PE=1 SV=2

Match to Query 5719: 2142.899952 from(715.307260,3+)

Title: Elution from: 34.932 to 34.932 scan no 2810 cid35.00 polarity:+:MA10:m1s

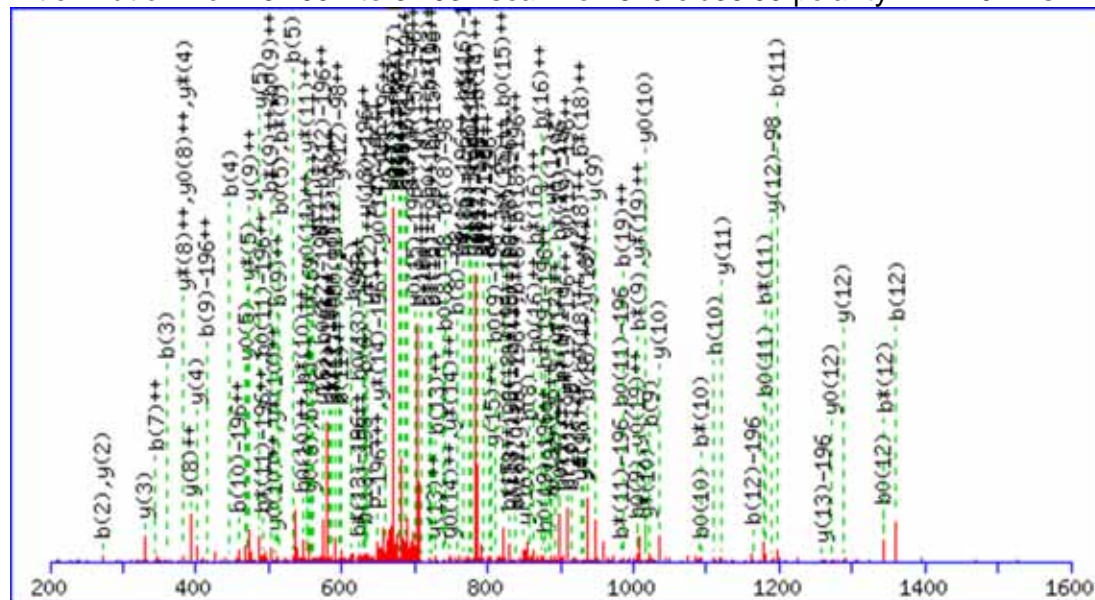

Monoisotopic mass of neutral peptide Mr(calc): 2142.8984

Fixed modifications: Carbamidomethyl (C) (apply to specified residues or termini only)

Variable modifications:

N-term : Dimethyl (N-term)

S8 : Phospho (ST), with neutral losses 0.0000(shown in table), 97.9769

S9 : Phospho (ST), with neutral losses 0.0000(shown in table), 97.9769

Ions Score: 50 Expect: 0.00046

Matched b ions: b(2), b(3), b(4), b(5), b(6), b(7)++, b(7), b(8)-98, b(8), b(9), b(9)++, b(9)-196++, b(10)++, b(10), b(10)-196++, b(10)-196, b(10)-98, b(11), b(11)++, b(11)-98++, b(12), b(12)++, b(12)-98, b(12)-196++, b(12)-98++, b(12)-196, b(13)-98, b(13)-98++, b(13)++, b(13)-196++, b(14)++, b(14)-196++, b(15)++, b(15)-98++, b(16)-196++, b(16)-98++, b(16)++, b(17)++, b(17)-98++, b(18)++, b(18)-196++, b(18)-98++, b(19)-98++, b(19)-196++, b(19)++

Matched y ions: y(2), y(3), y(4), y(5), y(6), y(7), y(8)++, y(8), y(9)++, y(9), y(10), y(11), y(11)++, y(12), y(12)-98++, y(12)-98, y(13)-196++, y(13)-98++, y(13)++, y(13)-196, y(14)-196++, y(14)-98++, y(15)-98++, y(15)++, y(16)++, y(17)-196++, y(17)-98++, y(17)++, y(18)++, y(18)-196++, y(18)-98++, y(19)-98++

Precursor origin neutral loss: +

## Peptide No.965

SRSSSVGSSSSYPISSAGPR

Confirmed sites: @S:8,@S:9,@S:10

Ambiguous sites:

MS/MS Fragmentation of **SRSSSVGSSSSYPISSAGPR**

Found in **PLEC\_MOUSE**, Plectin OS=Mus musculus GN=Plec PE=1 SV=2

Match to Query 7378: 2222.865534 from(741.962454,3+)

Title: Elution from: 38.336 to 38.336 scan no 3402 cid35.00 polarity:+:MA10:m1s

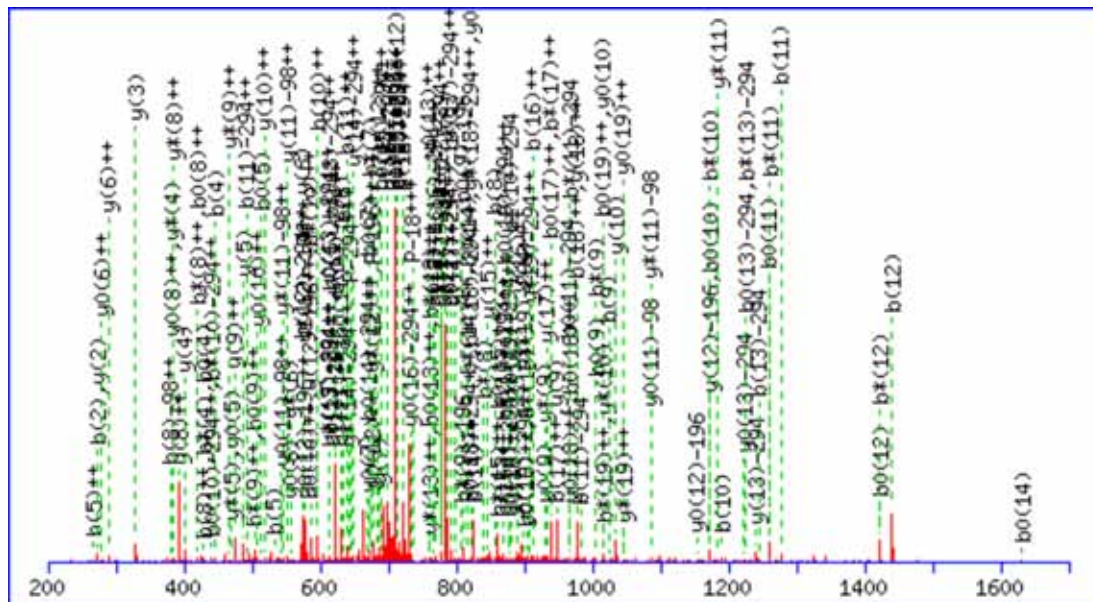

**Monoisotopic mass of neutral peptide Mr(calc):** 2222.8647

**Fixed modifications:** Carbamidomethyl (C) (apply to specified residues or termini only)

**Variable modifications:**

**N-term :** Dimethyl (N-term)

**S8 :** Phospho (ST), with neutral losses 97.9769(shown in table), 0.0000

**S9 :** Phospho (ST), with neutral losses 97.9769(shown in table), 0.0000

**S10 :** Phospho (ST), with neutral losses 97.9769(shown in table), 0.0000

**Ions Score:** 55 **Expect:** 0.00011

**Matched b ions:** b(2), b(4), b(5)++, b(5), b(6), b(7), b(8)++, b(8)-98++, b(8), b(9)-98, b(9), b(10), b(10)++, b(10)-98, b(10)-196++, b(10)-98++, b(11), b(11)-98, b(11)-294++, b(11)-98++, b(11)++, b(11)-294, b(12), b(12)-294++, b(12)-98, b(12)++, b(12)-196, b(12)-196++, b(12)-98++, b(13)-98, b(13)-196, b(13)-98++, b(13)++, b(13)-294, b(13)-294++, b(13)-196++, b(14)++, b(14)-98++, b(14)-196++, b(15)++, b(15)-294++, b(15)-98++, b(16)-294++, b(16)-196++, b(16)-98++, b(16)++, b(17)++, b(17)-196++, b(17)-98++, b(18)++, b(18)-98++, b(18)-196++, b(19)-98++, b(19)-196++, b(19)-294++

**Matched y ions:** y(2), y(3), y(4), y(5), y(6), y(6)++, y(7), y(8)++, y(8), y(9)++, y(9), y(10), y(10)++, y(11)-98++, y(12)-196, y(12)-196++, y(12)-98++, y(12)++, y(12)-98, y(13)-294++, y(13)-294, y(13)-98++, y(14)-294++, y(14)-196++, y(14)-98++, y(14)++, y(15)++, y(15)-294++, y(15)-196++, y(15)-98++, y(16)++, y(16)-196++, y(17)-294++, y(17)++, y(17)-196++, y(17)-98++, y(18)++, y(18)-98++, y(18)-196++, y(19)-294++, y(19)-196++, y(19)-98++

**Precursor origin neutral loss:** +

## Peptide No.966

**SRSSSVGSSSSYPISSAGPR**

**Confirmed sites:** @S:3,@S:4

**Ambiguous sites:**

MS/MS Fragmentation of **SRSSSVGSSSSYPISSAGPR**

Found in **PLEC\_MOUSE**, Plectin OS=Mus musculus GN=Plec PE=1 SV=2

Match to Query 4963: 2148.932199 from(717.318009,3+)



Title: Elution from: 34.753 to 34.753 scan no 2646 cid35.00 polarity:+:MA10:m1s

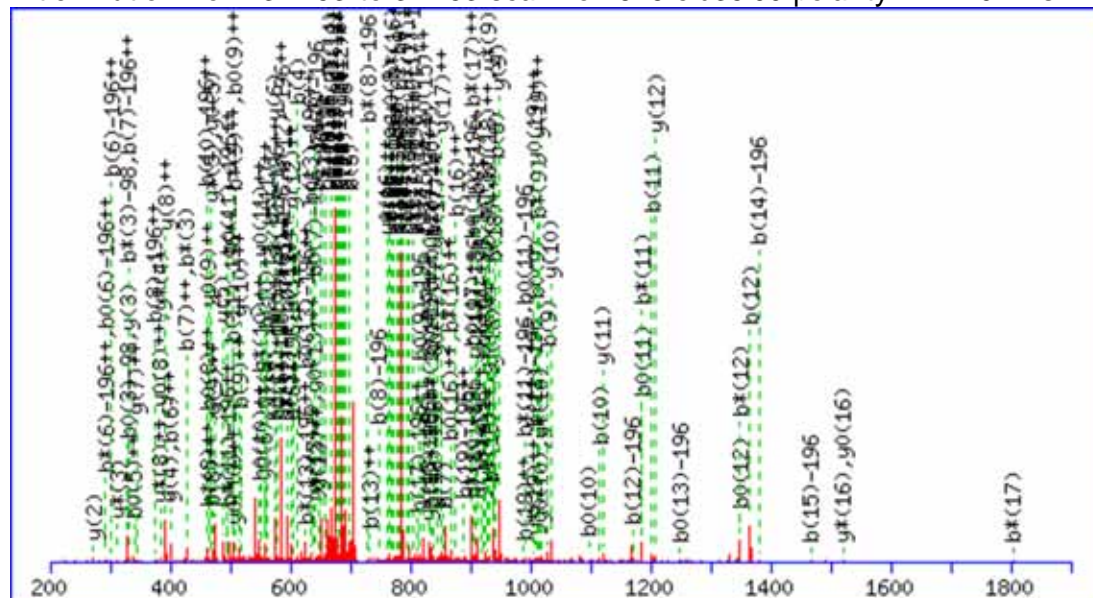

**Monoisotopic mass of neutral peptide Mr(calc):** 2148.9302

**Fixed modifications:** Carbamidomethyl (C) (apply to specified residues or termini only)

**Variable modifications:**

**N-term :** Dimethyl:2H(4)13C(2) (N-term)

**S3 :** Phospho (ST), with neutral losses 0.0000(shown in table), 97.9769

**S4 :** Phospho (ST), with neutral losses 0.0000(shown in table), 97.9769

**Ions Score:** 53 **Expect:** 0.00026

**Matched b ions:** b(4)-98, b(4), b(5)-98, b(5), b(6)++, b(6), b(6)-196, b(6)-196++, b(6)-98, b(7)++, b(7)-196++, b(7)-98++, b(7)-196, b(7)-98, b(7), b(8), b(8)++, b(8)-196++, b(8)-196, b(8)-98, b(9), b(9)++, b(9)-98++, b(9)-196, b(9)-98, b(10), b(10)++, b(10)-196++, b(10)-98++, b(10)-196, b(10)-98, b(11), b(11)++, b(11)-196, b(11)-196++, b(11)-98, b(12)-98, b(12), b(12)++, b(12)-196, b(12)-196++, b(12)-98++, b(13)-98, b(13)-98++, b(13)-196++, b(13)++, b(14)++, b(14)-196, b(14)-196++, b(14)-98++, b(15)-196, b(15)++, b(16)-196++, b(16)-98++, b(16)++, b(17)++, b(17)-196++, b(17)-98++, b(18)++, b(18)-98++, b(19)-98++, b(19)-196++, b(19)++

**Matched y ions:** y(2), y(3), y(4), y(5), y(6), y(7)++, y(7), y(8)++, y(8), y(9)++, y(9), y(10), y(10)++, y(11), y(11)++, y(12), y(12)++, y(13)++, y(14)++, y(16)++, y(17)++, y(17)-98++, y(18)-196++, y(18)-98++, y(18)++, y(19)-196++, y(19)-98++, y(19)++

**Precursor origin neutral loss:** +

## Peptide No.967

**SRSSSVGSSSSYPISSAGPR**

**Confirmed sites:** @S:4,@S:5

**Ambiguous sites:**

**MS/MS Fragmentation of SRSSSVGSSSSYPISSAGPR**

Found in **PLEC\_MOUSE**, Plectin OS=Mus musculus GN=Plec PE=1 SV=2

Match to Query 7025: 2148.930630 from(1075.472591,2+)

Title: Elution from: 34.953 to 34.953 scan no 2917 cid35.00 polarity:+:MA10







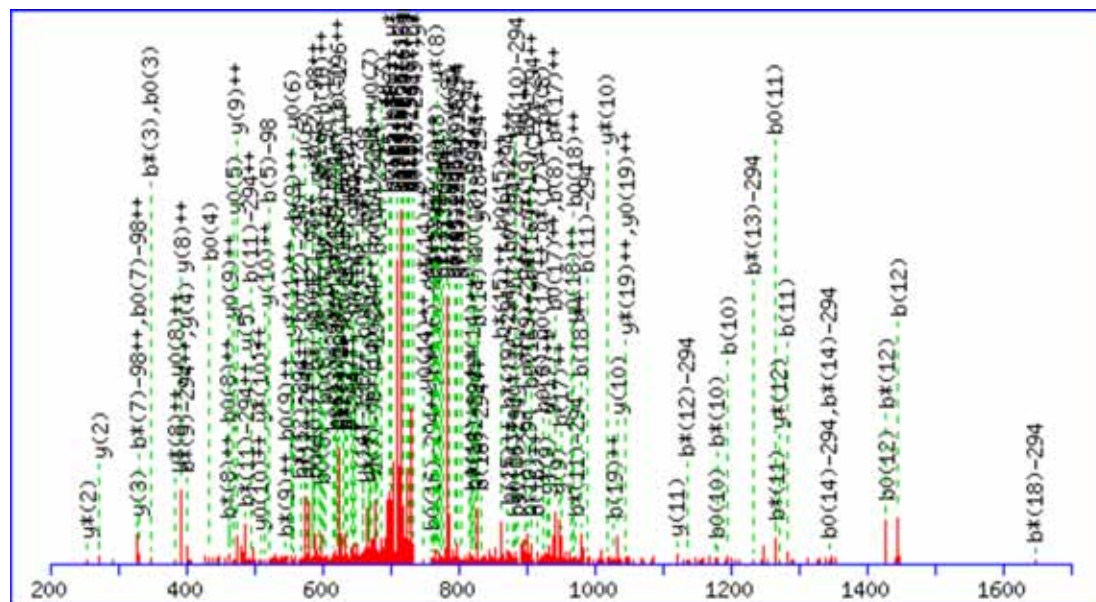

**Monoisotopic mass of neutral peptide Mr(calc):** 2228.8965

**Fixed modifications:** Carbamidomethyl (C) (apply to specified residues or termini only)

**Variable modifications:**

**N-term :** Dimethyl:2H(4)13C(2) (N-term)

**S5 :** Phospho (ST), with neutral losses 0.0000(shown in table), 97.9769

**S8 :** Phospho (ST), with neutral losses 0.0000(shown in table), 97.9769

**S9 :** Phospho (ST), with neutral losses 0.0000(shown in table), 97.9769

**Ions Score:** 50 **Expect:** 0.00038

**Matched b ions:** b(5)-98, b(5), b(6)-98, b(6), b(7)-98, b(7), b(8), b(8)-98, b(9)-196++, b(9)-98++, b(9)++, b(9)-294, b(10), b(10)-294, b(10)++, b(10)-196++, b(10)-98++, b(11), b(11)-294++, b(11)-196++, b(11)-98++, b(11)++, b(11)-294, b(12), b(12)-98, b(12)++, b(12)-294++, b(12)-196++, b(12)-98++, b(13)-98, b(13)-98++, b(13)-294++, b(13)-196++, b(13)++, b(14)++, b(14)-196++, b(14)-98++, b(14)-294++, b(15)-294++, b(15)-98++, b(15)++, b(16)-98++, b(16)++, b(17)-98++, b(17)++, b(17)-196++, b(18)++, b(18)-294++, b(18)-98++, b(19)-98++, b(19)-294++, b(19)-196++, b(19)++

**Matched y ions:** y(2), y(3), y(4), y(5), y(6), y(7), y(8)++, y(8), y(9)++, y(9), y(10), y(10)++, y(11), y(12)-98++, y(12)++, y(13)-196++, y(13)-98++, y(13)++, y(14)-196++, y(14)-98++, y(15)-196++, y(15)++, y(16)-196++, y(16)-98++, y(17)-294++, y(17)-196++, y(17)-98++, y(17)++, y(18)-294++, y(18)-98++, y(19)-294++, y(19)-196++, y(19)-98++

**Precursor origin neutral loss:** +

## Peptide No.970

**SRSSSVGSSSSYPISSAGPR**

**Confirmed sites:** @S:8,@S:9,@S:10

**Ambiguous sites:**

MS/MS Fragmentation of **SRSSSVGSSSSYPISSAGPR**

Found in **PLEC\_MOUSE**, Plectin OS=Mus musculus GN=Plec PE=1 SV=2

Match to Query 5707: 2228.897307 from(743.973045,3+)

Title: Elution from: 38.407 to 38.407 scan no 3237 cid35.00 polarity:+:MA10:m1s



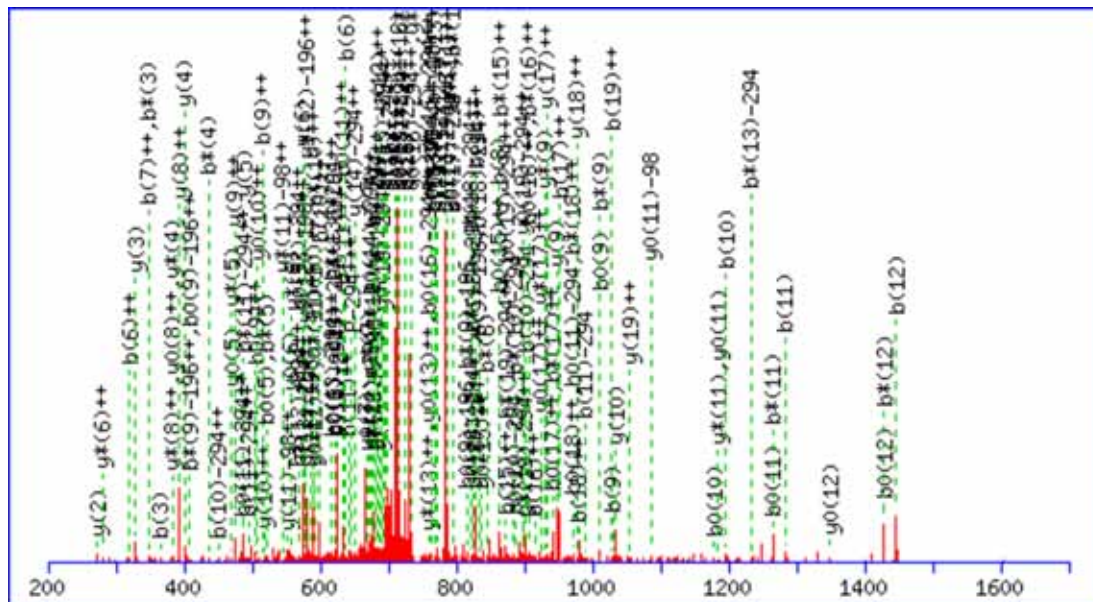

**Monoisotopic mass of neutral peptide Mr(calc):** 2228.8965

**Fixed modifications:** Carbamidomethyl (C) (apply to specified residues or termini only)

**Variable modifications:**

**N-term :** Dimethyl:2H(4)13C(2) (N-term)

**S8 :** Phospho (ST), with neutral losses 0.0000(shown in table), 97.9769

**S9 :** Phospho (ST), with neutral losses 0.0000(shown in table), 97.9769

**S10 :** Phospho (ST), with neutral losses 0.0000(shown in table), 97.9769

**Ions Score:** 36 **Expect:** 0.0084

**Matched b ions:** b(3), b(6)++, b(6), b(7)++, b(7), b(8), b(8)-98, b(9), b(9)++, b(9)-196, b(9)-98, b(10)-294, b(10), b(10)++, b(10)-98, b(10)-294++, b(10)-98++, b(11), b(11)-294++, b(11)-196++, b(11)-98++, b(11)++, b(11)-294, b(12), b(12)-98, b(12)++, b(12)-294++, b(12)-196++, b(12)-98++, b(13)-98, b(13)-196, b(13)-98++, b(13)-294++, b(13)-196++, b(13)++, b(14)++, b(14)-294++, b(14)-196++, b(14)-98++, b(15)++, b(15)-294++, b(15)-98++, b(16)-294++, b(16)-196++, b(16)-98++, b(16)++, b(17)++, b(17)-98++, b(17)-196++, b(18)++, b(18)-294++, b(18)-196++, b(18)-98++, b(19)-98++, b(19)-196++, b(19)++

**Matched y ions:** y(2), y(3), y(4), y(5), y(6), y(7), y(8)++, y(8), y(9), y(9)++, y(10), y(10)++, y(11)-98++, y(12)-196++, y(12)++, y(13)-294++, y(13)-196++, y(13)-98++, y(13)++, y(14)-196++, y(14)-294++, y(15)-294++, y(15)-98++, y(16)-196++, y(16)-98++, y(17)-294++, y(17)-196++, y(17)-98++, y(17)++, y(18)-294++, y(18)-98++, y(18)++, y(19)-196++, y(19)++

**Precursor origin neutral loss:** +

## Peptide No.971

**SRTASLTSAASIDGSR**

**Confirmed sites:** @S:1,@T:3

**Ambiguous sites:**

MS/MS Fragmentation of **SRTASLTSAASIDGSR**

Found in **NDRG2\_MOUSE**, Protein NDRG2 OS=Mus musculus GN=NdrG2 PE=1 SV=1

Match to Query 3099: 1766.761332 from(589.927720,3+)





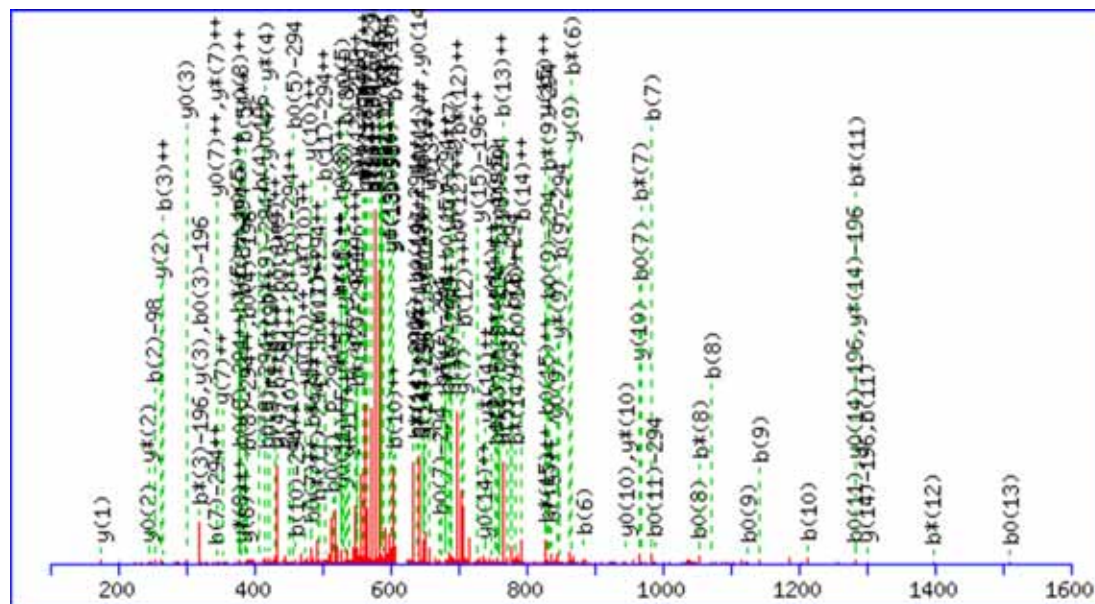

**Monoisotopic mass of neutral peptide Mr(calc):** 1846.7264

**Fixed modifications:** Carbamidomethyl (C) (apply to specified residues or termini only)

**Variable modifications:**

**N-term :** Dimethyl (N-term)

**S1 :** Phospho (ST), with neutral losses 0.0000(shown in table), 97.9769

**T3 :** Phospho (ST), with neutral losses 0.0000(shown in table), 97.9769

**S5 :** Phospho (ST), with neutral losses 0.0000(shown in table), 97.9769

**Ions Score:** 50 **Expect:** 0.00021

**Matched b ions:** b(2)-98, b(3)-98, b(3)++, b(3), b(4)-98++, b(4), b(4)-196, b(4)-98, b(5)-196++, b(5)++, b(5)-196, b(5)-98, b(5), b(6), b(6)-98, b(6)-196++, b(6)-98++, b(6)-294, b(6)-196, b(7), b(7)-98, b(7)-98++, b(7)++, b(7)-294++, b(7)-196++, b(7)-196, b(8), b(8)-294++, b(8)-98++, b(8)++, b(8)-294, b(8)-196, b(8)-98, b(9), b(9)++, b(9)-98++, b(9)-196++, b(9)-294, b(9)-196, b(9)-98, b(10)-98, b(10), b(10)-98++, b(10)-294++, b(10)-196++, b(10)++, b(11), b(11)++, b(11)-196, b(11)-294++, b(11)-98++, b(12)++, b(12)-294++, b(12)-98++, b(13)++, b(13)-98++, b(13)-196++, b(14)++, b(14)-294++, b(14)-196++, b(14)-98++, b(15)++, b(15)-294++, b(15)-196++, b(15)-98++

**Matched y ions:** y(1), y(2), y(3), y(4), y(5), y(6), y(7), y(7)++, y(8), y(8)++, y(9)++, y(9), y(10), y(10)++, y(11)++, y(12)-98++, y(13)++, y(14)-98, y(14)-196, y(14)-196++, y(14)-98++, y(14)++, y(15)-196++, y(15)-98++, y(15)++

**Precursor origin neutral loss:** +

## Peptide No.973

**SRTASLTSAASIDGSR**

**Confirmed sites:** @S:5,@T:7

**Ambiguous sites:**

MS/MS Fragmentation of **SRTASLTSAASIDGSR**

Found in **NDRG2\_MOUSE**, Protein NDRG2 OS=Mus musculus GN=Ndr2 PE=1 SV=1

Match to Query 4744: 1766.760699 from(589.927509,3+)

Title: Elution from: 36.024 to 36.024 scan no 3071 cid35.00 polarity:+:MA10

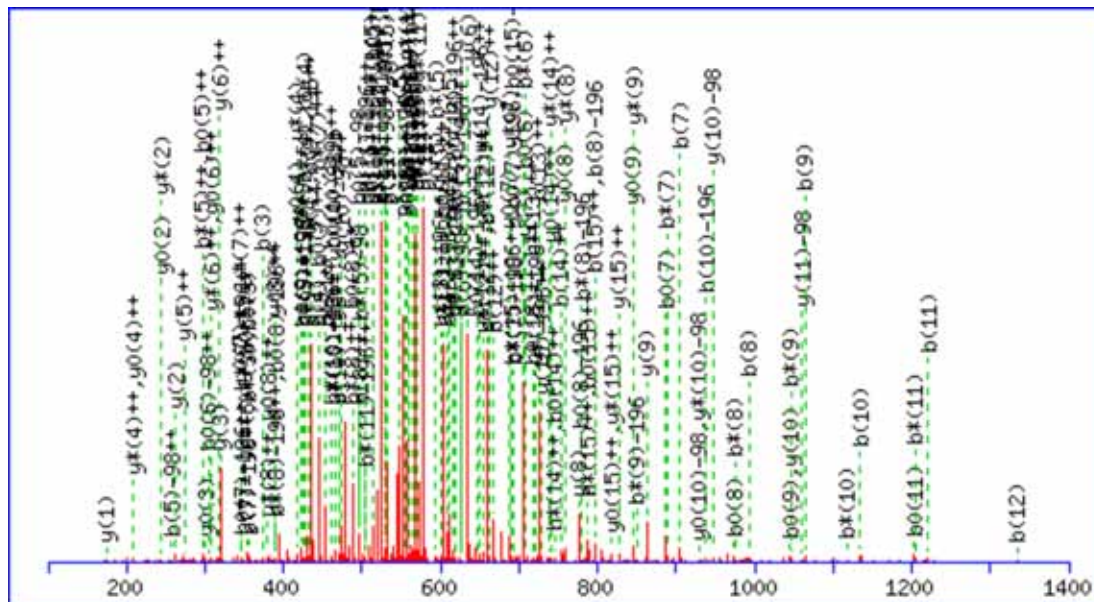

**Monoisotopic mass of neutral peptide Mr(calc):** 1766.7601

**Fixed modifications:** Carbamidomethyl (C) (apply to specified residues or termini only)

**Variable modifications:**

**N-term :** Dimethyl (N-term)

**S5 :** Phospho (ST), with neutral losses 0.0000(shown in table), 97.9769

**T7 :** Phospho (ST), with neutral losses 0.0000(shown in table), 97.9769

**Ions Score:** 67 **Expect:** 7e-006

**Matched b ions:** b(3), b(4), b(5), b(5)-98++, b(5)-98, b(6)-98, b(7), b(7)++, b(7)-196++, b(7)-98++, b(7)-98, b(8)-196, b(8), b(8)-98++, b(8)++, b(8)-98, b(9)-196++, b(9), b(9)-98, b(9)++, b(9)-98++, b(10), b(10)++, b(10)-98, b(10)-196, b(10)-196++, b(10)-98++, b(11), b(11)++, b(11)-196++, b(11)-98++, b(12), b(12)++, b(12)-196++, b(12)-98++, b(13)++, b(13)-98++, b(13)-196++, b(14)-98++, b(14)++, b(15)++

**Matched y ions:** y(1), y(2), y(3), y(4), y(5), y(5)++, y(6), y(6)++, y(7), y(7)++, y(8), y(8)++, y(9), y(9)++, y(10)++, y(10), y(10)-98, y(10)-98++, y(11)-98++, y(11)++, y(11)-98, y(12)-196++, y(12)-98++, y(12)++, y(13)-196++, y(13)-98++, y(14)-196++, y(14)-98++, y(15)-98++, y(15)-196++, y(15)++

**Precursor origin neutral loss:**

## Peptide No.974

**SRTASLTSAASIDGSR**

**Confirmed sites:** @S:5,@T:7,@S:8

**Ambiguous sites:**

**MS/MS Fragmentation of** **SRTASLTSAASIDGSR**

Found in **NDRG2\_MOUSE**, Protein NDRG2 OS=Mus musculus GN=NdrG2 PE=1 SV=1

Match to Query 4649: 1846.727079 from(616.582969,3+)

Title: Elution from: 38.106 to 38.106 scan no 3413 cid35.00 polarity:+:MA10







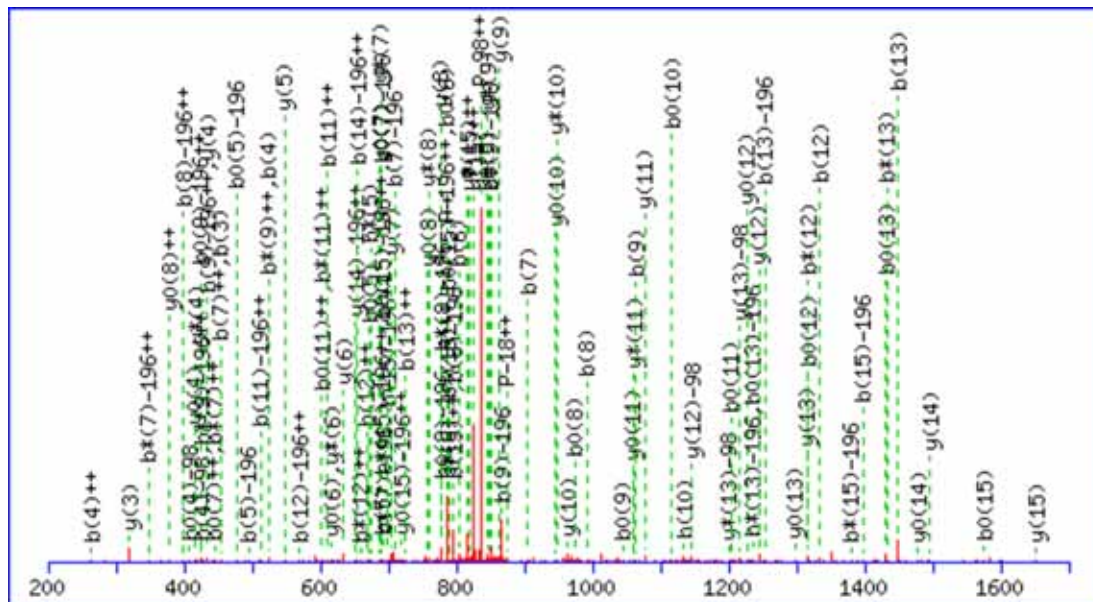

**Monoisotopic mass of neutral peptide Mr(calc):** 1766.7601

**Fixed modifications:** Carbamidomethyl (C) (apply to specified residues or termini only)

**Variable modifications:**

**N-term :** Dimethyl (N-term)

**T3 :** Phospho (ST), with neutral losses 0.0000(shown in table), 97.9769

**S5 :** Phospho (ST), with neutral losses 0.0000(shown in table), 97.9769

**Ions Score:** 97 **Expect:** 8.5e-009

**Matched b ions:** b(3), b(4)-98, b(4), b(4)++, b(5)-98, b(5)-196, b(5), b(6)-98, b(6), b(7)++, b(7)-196, b(7), b(8)-196++, b(8)-196, b(8)-98, b(8), b(9)-196++, b(9)-196, b(9)-98, b(9), b(10), b(10)-98, b(11)-196++, b(11)++, b(11)-98, b(12)-98, b(12), b(12)-196++, b(12)++, b(13)-98, b(13), b(13)++, b(13)-196, b(14)-98++, b(14)-196++, b(15)-196, b(15)-196++, b(15)++

**Matched y ions:** y(3), y(4), y(5), y(6), y(7), y(8), y(9), y(10), y(11), y(12), y(12)-98, y(13)-98, y(13), y(14), y(14)-196++, y(14)-98, y(15)++, y(15), y(15)-98++

**Precursor origin neutral loss:** +

## Peptide No.976

**SRTASLTSAASIDGSR**

**Confirmed sites:** @T:3,@S:5,@T:7

**Ambiguous sites:**

MS/MS Fragmentation of **SRTASLTSAASIDGSR**

Found in **NDRG2\_MOUSE**, Protein NDRG2 OS=Mus musculus GN=Ndr2 PE=1 SV=1

Match to Query 3601: 1846.727500 from(924.371026,2+)

Title: Elution from: 36.587 to 36.587 scan no 2986 cid35.00 polarity:+:MA10



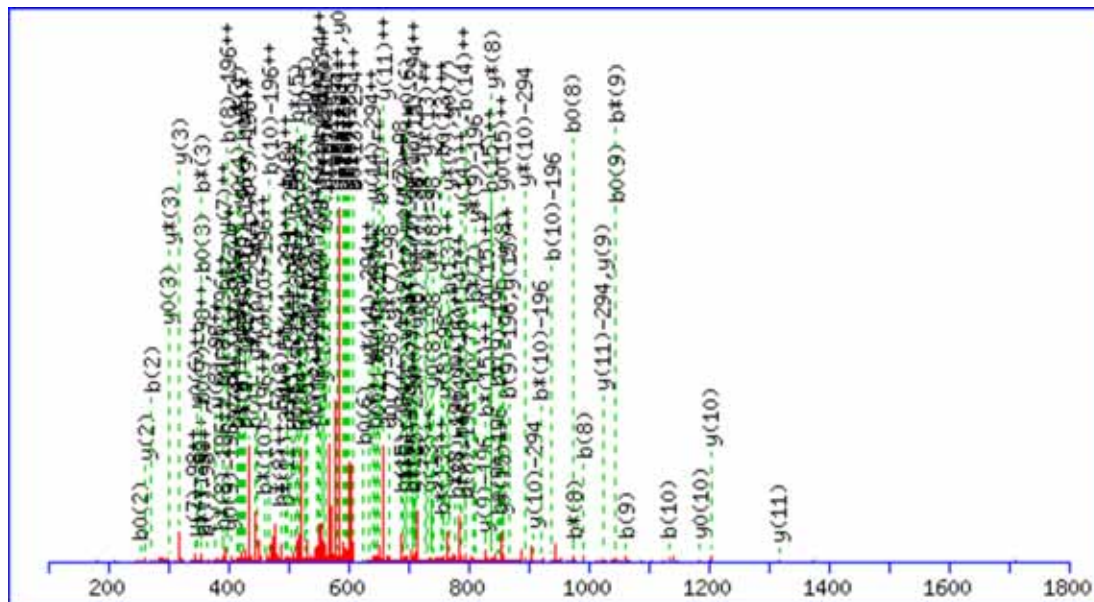

**Monoisotopic mass of neutral peptide Mr(calc):** 1846.7264

**Fixed modifications:** Carbamidomethyl (C) (apply to specified residues or termini only)

**Variable modifications:**

**N-term :** Dimethyl (N-term)

**T7 :** Phospho (ST), with neutral losses 0.0000(shown in table), 97.9769

**S8 :** Phospho (ST), with neutral losses 0.0000(shown in table), 97.9769

**S11 :** Phospho (ST), with neutral losses 0.0000(shown in table), 97.9769

**Ions Score:** 46 **Expect:** 0.00057

**Matched b ions:** b(2), b(4), b(5), b(6), b(7)-98++, b(7)++, b(7)-98, b(8), b(8)-196++, b(8)-98++, b(8)++, b(8)-196, b(8)-98, b(9)-196++, b(9), b(9)++, b(9)-98++, b(9)-196, b(9)-98, b(10)++, b(10), b(10)-98++, b(10)-196++, b(10)-196, b(11)-98, b(11)-98++, b(11)-196++, b(11)-294++, b(11)++, b(12)-98, b(12)-98++, b(12)-294++, b(12)++, b(13)++, b(13)-98++, b(13)-196++, b(14)++, b(14)-294++, b(14)-196++, b(14)-98++, b(15)-98++, b(15)-294++, b(15)-196++, b(15)++

**Matched y ions:** y(2), y(3), y(4), y(5), y(6), y(7), y(7)-98++, y(7)-98, y(7)++, y(8), y(8)++, y(8)-98++, y(8)-98, y(9)-98, y(9)-196++, y(9)++, y(9)-196, y(9), y(10), y(10)++, y(10)-98++, y(10)-98, y(10)-196++, y(10)-294, y(11), y(11)++, y(11)-294++, y(11)-196++, y(11)-294, y(12)-196++, y(12)-294++, y(12)-98++, y(12)++, y(13)-294++, y(13)-196++, y(13)-98++, y(13)++, y(14)++, y(14)-294++, y(14)-196++, y(14)-98++, y(15)-196++, y(15)-98++, y(15)++

**Precursor origin neutral loss:** +

## Peptide No.978

**SRTASL TSAASIDGSR**

**Confirmed sites:** @S:1,@T:3,@S:5

**Ambiguous sites:**

MS/MS Fragmentation of **SRTASL TSAASIDGSR**

Found in **NDRG2\_MOUSE**, Protein NDRG2 OS=Mus musculus GN=NdrG2 PE=1 SV=1

Match to Query 3782: 1852.758735 from(618.593521,3+)

Title: Elution from: 39.953 to 39.953 scan no 3467 cid35.00 polarity:+:MA10





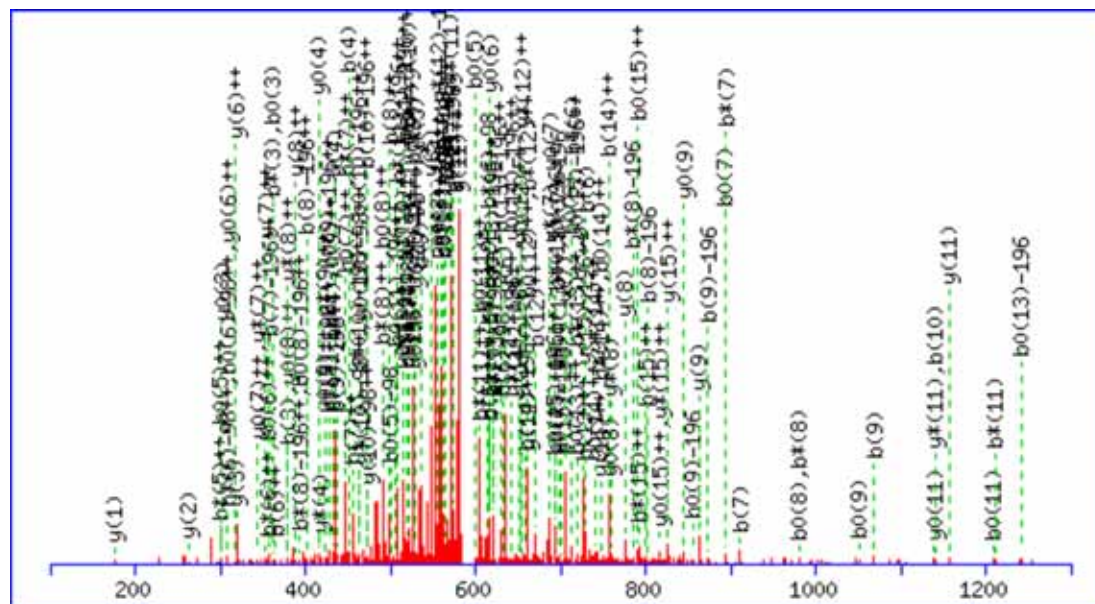

**Monoisotopic mass of neutral peptide Mr(calc): 1772.7919**

**Fixed modifications:** Carbamidomethyl (C) (apply to specified residues or termini only)

**Variable modifications:**

**N-term :** Dimethyl:2H(4)13C(2) (N-term)

**S5 :** Phospho (ST), with neutral losses 0.0000(shown in table), 97.9769

**T7 :** Phospho (ST), with neutral losses 0.0000(shown in table), 97.9769

**Ions Score:** 48 **Expect:** 0.00061

**Matched b ions:** b(3), b(4), b(5)-98, b(5), b(6)++, b(6)-98, b(6), b(7), b(7)++, b(7)-196++, b(7)-98++, b(7)-98, b(8)-98++, b(8)-196++, b(8)++, b(8)-196, b(9), b(9)++, b(9)-98, b(9)-196++, b(9)-98++, b(9)-196, b(10)++, b(10), b(10)-196++, b(10)-98++, b(11)-196++, b(11)-98++, b(11)++, b(12)-98++, b(12)-196++, b(12)++, b(13)++, b(13)-196++, b(13)-98++, b(14)++, b(14)-196++, b(14)-98++, b(15)-196++, b(15)-98++, b(15)++

**Matched y ions:** y(1), y(2), y(3), y(4), y(5), y(6), y(6)++, y(7), y(7)++, y(8), y(8)++, y(9), y(9)++, y(10)-98++, y(10)++, y(11)++, y(11), y(11)-98++, y(12)-196++, y(12)-98++, y(12)++, y(13)-98++, y(13)++, y(14)-196++, y(14)++, y(15)-196++, y(15)++, y(15)-98++

**Precursor origin neutral loss:** +

## Peptide No.980

**SRTASL TSAASIDGSR**

**Confirmed sites:** @T:3,@S:5

**Ambiguous sites:**

MS/MS Fragmentation of **SRTASL TSAASIDGSR**

Found in **NDRG2\_MOUSE**, Protein NDRG2 OS=Mus musculus GN=Ndr2 PE=1 SV=1

Match to Query 3131: 1772.791926 from(591.937918,3+)

Title: Elution from: 36.049 to 36.049 scan no 2916 cid35.00 polarity:+:MA10

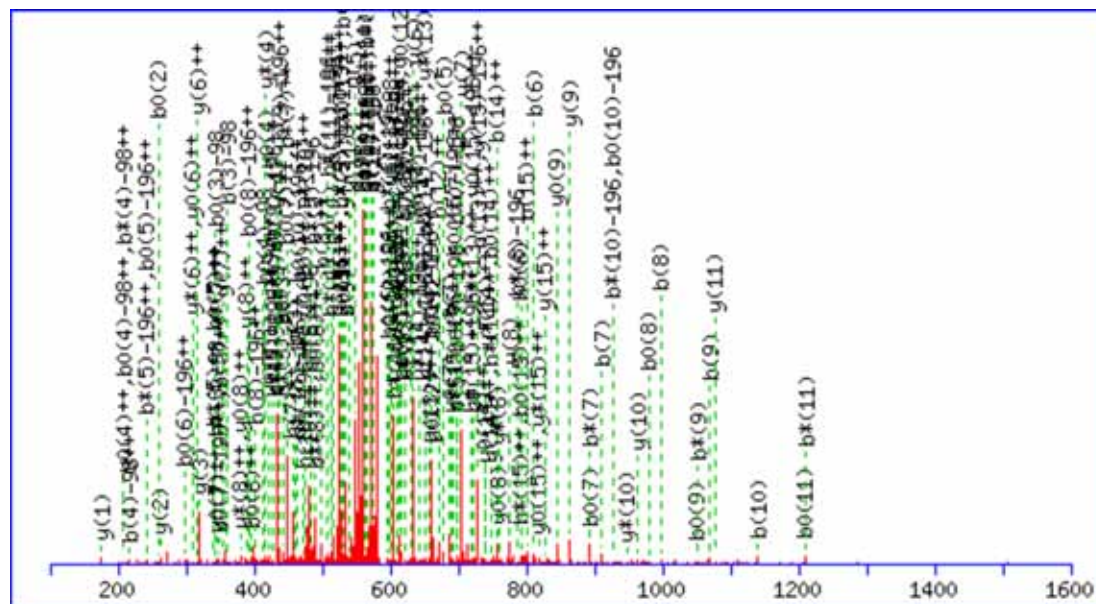

**Monoisotopic mass of neutral peptide Mr(calc): 1772.7919**

**Fixed modifications:** Carbamidomethyl (C) (apply to specified residues or termini only)

**Variable modifications:**

**N-term :** Dimethyl:2H(4)13C(2) (N-term)

**T3 :** Phospho (ST), with neutral losses 0.0000(shown in table), 97.9769

**S5 :** Phospho (ST), with neutral losses 0.0000(shown in table), 97.9769

**Ions Score:** 74 **Expect:** 1.5e-006

**Matched b ions:** b(3)-98, b(3), b(4)-98, b(4)-98++, b(4), b(5)-98++, b(5)++, b(5)-98, b(5), b(6)-98++, b(6), b(6)-196, b(6)-98, b(7), b(7)++, b(7)-98++, b(7)-98, b(8), b(8)-196++, b(8)-98++, b(8)++, b(9), b(9)-98, b(9)++, b(9)-196++, b(9)-98++, b(10), b(10)++, b(10)-196++, b(10)-98++, b(11)++, b(11)-196++, b(11)-98++, b(12)++, b(12)-196++, b(12)-98++, b(13)++, b(13)-98++, b(13)-196++, b(14)++, b(14)-196++, b(14)-98++, b(15)++, b(15)-98++

**Matched y ions:** y(1), y(2), y(3), y(4), y(5), y(6), y(6)++, y(7), y(7)++, y(8), y(8)++, y(9), y(9)++, y(10), y(10)++, y(11), y(11)++, y(12)-98++, y(13)-98++, y(13)++, y(14)-196++, y(14)++, y(15)-196++, y(15)-98++, y(15)++

**Precursor origin neutral loss:** +

## Peptide No.981

**SRTASLTSAASIDGSR**

**Confirmed sites:** @T:3,@S:5,@T:7

**Ambiguous sites:**

MS/MS Fragmentation of **SRTASLTSAASIDGSR**

Found in **NDRG2\_MOUSE**, Protein NDRG2 OS=Mus musculus GN=Ndr2 PE=1 SV=1

Match to Query 3382: 1852.759088 from(927.386820,2+)

Title: Elution from: 36.425 to 36.425 scan no 2871 cid35.00 polarity:+:MA10

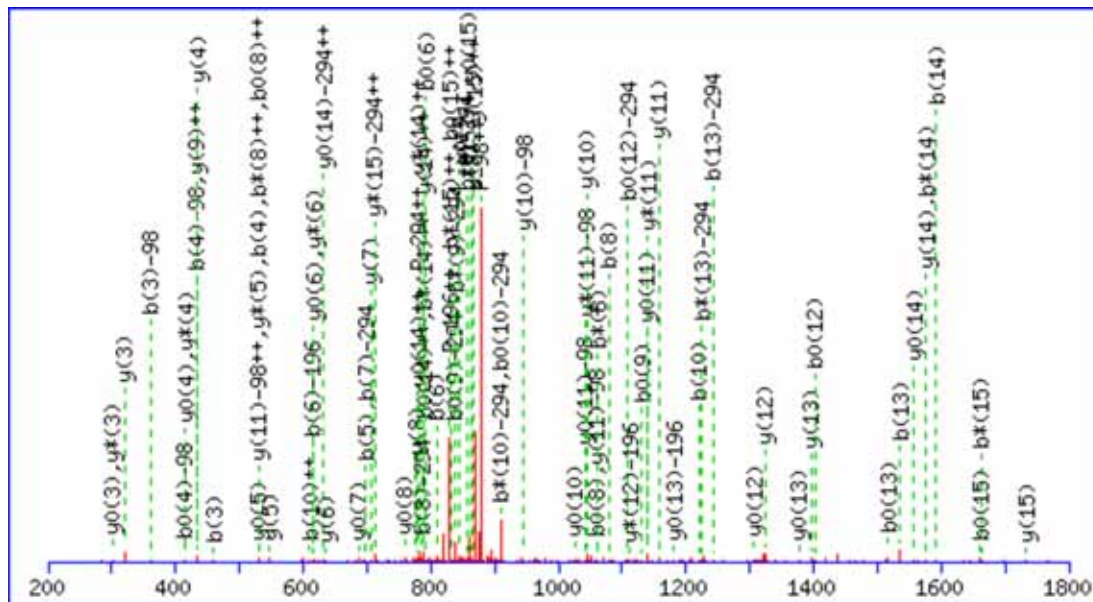

**Monoisotopic mass of neutral peptide Mr(calc):** 1852.7582

**Fixed modifications:** Carbamidomethyl (C) (apply to specified residues or termini only)

**Variable modifications:**

**N-term :** Dimethyl:2H(4)13C(2) (N-term)

**T3 :** Phospho (ST), with neutral losses 0.0000(shown in table), 97.9769

**S5 :** Phospho (ST), with neutral losses 0.0000(shown in table), 97.9769

**T7 :** Phospho (ST), with neutral losses 0.0000(shown in table), 97.9769

**Ions Score:** 42 **Expect:** 0.0017

**Matched b ions:** b(3)-98, b(3), b(4)-98, b(4), b(5)-98, b(5), b(6)-98, b(6)-196, b(6), b(7)-98, b(7)-294, b(7)-196, b(8), b(8)-294, b(8)-196, b(8)-98, b(9)-98, b(9)-294, b(9)-196, b(10)-98, b(10), b(10)++, b(11)-98, b(11)-196, b(12)-98, b(12)-196, b(13)-98, b(13), b(13)-196, b(13)-294, b(14), b(15)-98++

**Matched y ions:** y(3), y(4), y(5), y(6), y(7), y(8), y(9)++, y(9), y(10), y(10)-98, y(11)-98++, y(11),

y(11)-98, y(12)-98, y(12), y(13), y(13)-98, y(14)-98, y(14), y(14)++, y(15), y(15)-98, y(15)-98++, y(15)++

**Precursor origin neutral loss:** +

## Peptide No.982

**SRTLQSSESGLPSGPPGHTMEVSC**

**Confirmed sites:** @S:1,@T:3

**Ambiguous sites:**

MS/MS Fragmentation of **SRTLQSSESGLPSGPPGHTMEVSC**

Found in **NDRG2\_MOUSE**, Protein NDRG2 OS=Mus musculus GN=Ndr2 PE=1 SV=1

Match to Query 6787: 2892.173463 from(965.065097,3+)

Title: Elution from: 38.279 to 38.279 scan no 3128 cid35.00 polarity:+MA10:m1s



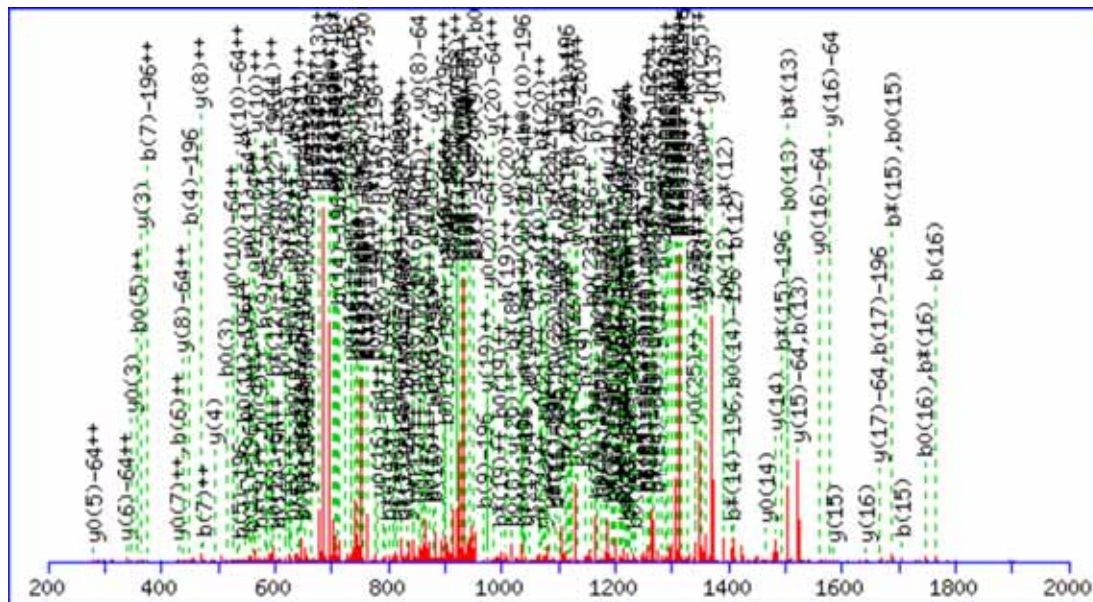

**Monoisotopic mass of neutral peptide Mr(calc):** 2892.1708

**Fixed modifications:** Carbamidomethyl (C) (apply to specified residues or termini only)

**Variable modifications:**

**N-term :** Dimethyl (N-term)

**S1 :** Phospho (ST), with neutral losses 0.0000(shown in table), 97.9769

**T3 :** Phospho (ST), with neutral losses 0.0000(shown in table), 97.9769

**M22 :** Oxidation (M), with neutral losses 0.0000(shown in table), 63.9983

**Ions Score:** 69 **Expect:** 7.6e-006

**Matched b ions:** b(4), b(4)-196, b(5)-196, b(5)-98, b(5), b(6)++, b(6), b(6)-196, b(6)-98, b(7)-196, b(7)++, b(7)-196++, b(7)-98++, b(7)-98, b(7), b(8)-98++, b(8)-98, b(8), b(9), b(9)-98, b(9)-98++, b(9)++, b(9)-196, b(10)-98, b(10)++, b(10), b(11)++, b(11)-196++, b(11)-196, b(11)-98, b(11), b(12), b(12)++, b(12)-196++, b(12)-98++, b(12)-196, b(12)-98, b(13), b(13)-98, b(13)++, b(13)-98++, b(13)-196++, b(13)-196, b(14)-98, b(14)-98++, b(14)-196++, b(14)++, b(15)-98, b(15), b(15)++, b(15)-196++, b(15)-98++, b(16), b(16)++, b(16)-98, b(16)-98++, b(17)-98++, b(17)-196, b(17)-196++, b(17)++, b(18)-196++, b(18)-98++, b(19)++, b(19)-196++, b(20)++, b(20)-98++, b(21)-98++, b(22)++, b(22)-196++, b(22)-98++, b(23)++, b(23)-98++, b(23)-196++, b(24)-98++, b(24)++, b(24)-196++, b(25)++, b(25)-196++, b(25)-98++

**Matched y ions:** y(3), y(4), y(5), y(6), y(7), y(8)++, y(8), y(9), y(10)++, y(10), y(11), y(11)++, y(12), y(12)++, y(13)++, y(13), y(14)++, y(14), y(15), y(15)++, y(16)++, y(16), y(17)++, y(18)++, y(19)++, y(20)++, y(21)++, y(22)++, y(24)-98++, y(25)++, y(25)-98++

**Precursor origin neutral loss:** +

## Peptide No.983

**SRTLQSSESGLPSGPPGHTMEVSC**

**Confirmed sites:** @S:1,@T:3,@S:5

**Ambiguous sites:**

MS/MS Fragmentation of **SRTLQSSESGLPSGPPGHTMEVSC**

Found in **NDRG2\_MOUSE**, Protein NDRG2 OS=Mus musculus GN=Ndr2 PE=1 SV=1







Found in **NDRG2\_MOUSE**, Protein NDRG2 OS=Mus musculus GN=Ndr2 PE=1 SV=1

Match to Query 7174: 2972.137377 from(991.719735,3+)

Title: Elution from: 40.732 to 40.732 scan no 3550 cid35.00 polarity:+:MA10:m1s

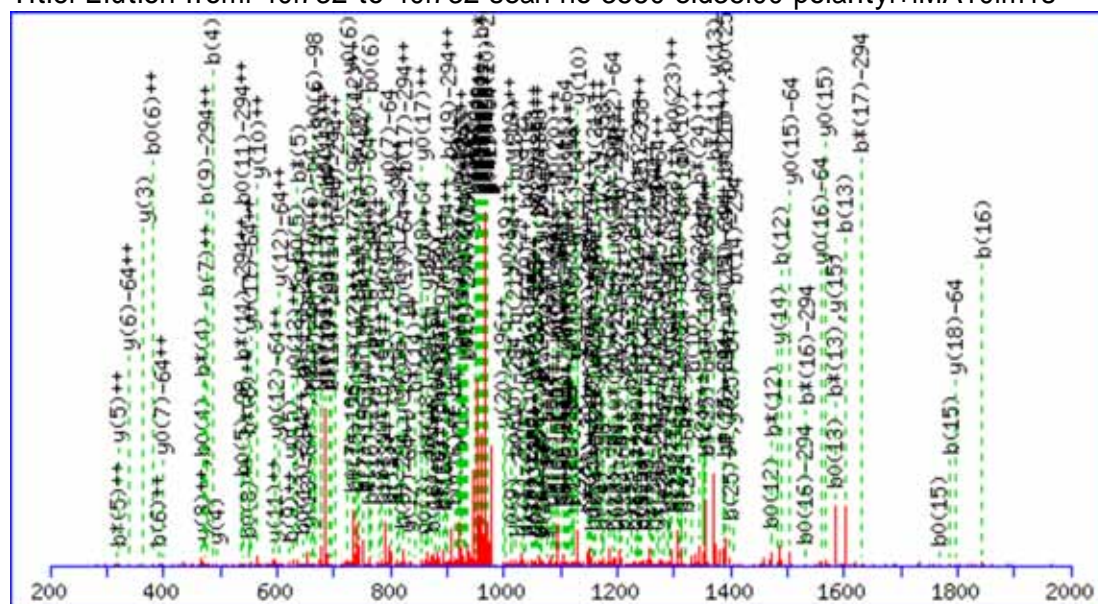



# SRTLQSSESGTLPSPGPPGHTMEVSC

Confirmed sites: @T:3,@S:5

Ambiguous sites:

MS/MS Fragmentation of **SRTLQSSESGTLPSPGPPGHTMEVSC**

Found in **NDRG2\_MOUSE**, Protein NDRG2 OS=Mus musculus GN=NdrG2 PE=1 SV=1

Match to Query 8416: 2892.172458 from(965.064762,3+)

Title: Elution from: 38.527 to 38.527 scan no 3469 cid35.00 polarity:+:MA10:m1s

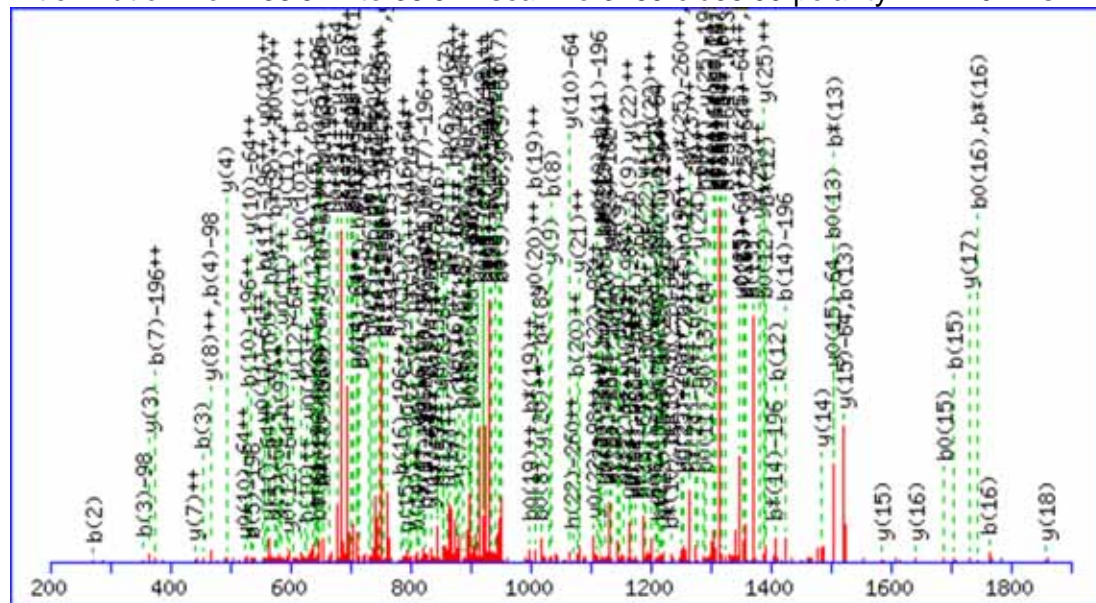

**Monoisotopic mass of neutral peptide Mr(calc):** 2892.1708

**Fixed modifications:** Carbamidomethyl (C) (apply to specified residues or termini only)

**Variable modifications:**

**N-term :** Dimethyl (N-term)

**T3 :** Phospho (ST), with neutral losses 0.0000(shown in table), 97.9769

**S5 :** Phospho (ST), with neutral losses 0.0000(shown in table), 97.9769

**M22 :** Oxidation (M), with neutral losses 0.0000(shown in table), 63.9983

**Ions Score:** 69 **Expect:** 6.9e-006

**Matched b ions:** b(2), b(3)-98, b(3), b(4)-98, b(4), b(5)-98, b(5)-196, b(5), b(6), b(6)-98, b(7)-196, b(7)-196++, b(7)-98, b(7), b(8)-98++, b(8), b(8)-98, b(9), b(9)-98++, b(9)-98, b(9)++, b(10)-196++, b(10), b(10)-98++, b(10)++, b(11)++, b(11)-196++, b(11)-98++, b(11)-196, b(11)-98, b(11), b(12), b(12)-98++, b(12)++, b(12)-196, b(13), b(13)-98, b(13)++, b(13)-98++, b(13)-196++, b(13)-196, b(14)-98, b(14)-196, b(14)-98++, b(14)-196++, b(14)++, b(15)++, b(15), b(15)-196++, b(16), b(16)-98++, b(16)-196++, b(16)++, b(17)-196++, b(17)-98++, b(17)++, b(18)-98, b(18)-196++, b(18)-98++, b(19)++, b(19)-196++, b(20)++, b(22)++, b(22)-98++, b(23)++, b(23)-98++, b(24)-98++, b(24)++, b(24)-196++, b(25)++, b(25)-98++

**Matched y ions:** y(3), y(4), y(5), y(6), y(7)++, y(7), y(8)++, y(8), y(9), y(10)++, y(10), y(11), y(11)++, y(12)++, y(12), y(13)++, y(13), y(14)++, y(14), y(15), y(15)++, y(16), y(16)++, y(17)++, y(17), y(18), y(18)++, y(20)++, y(21)++, y(22)++, y(22)-98++, y(23)++, y(24)-196++, y(24)-98++, y(25)-98++, y(25)++, y(25)-196++

**Precursor origin neutral loss:** +

## Peptide No.987



# SRTLQSSESGTLPSPGPPGHTMEVSC

Confirmed sites: @T:3,@S:5,@S:7

Ambiguous sites:

MS/MS Fragmentation of **SRTLQSSESGTLPSPGPPGHTMEVSC**

Found in **NDRG2\_MOUSE**, Protein NDRG2 OS=Mus musculus GN=NdrG2 PE=1 SV=1

Match to Query 7177: 2972.139240 from(991.720356,3+)

Title: Elution from: 40.297 to 40.297 scan no 3494 cid35.00 polarity:+:MA10:m1s

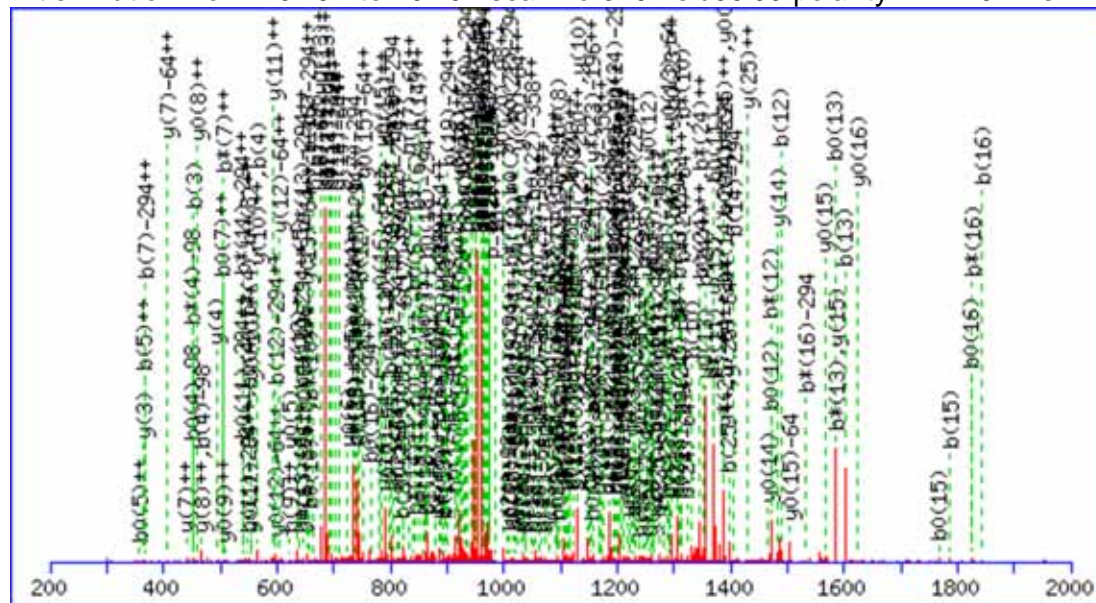

**Monoisotopic mass of neutral peptide Mr(calc):** 2972.1371

**Fixed modifications:** Carbamidomethyl (C) (apply to specified residues or termini only)

**Variable modifications:**

**N-term :** Dimethyl (N-term)

**T3 :** Phospho (ST), with neutral losses 0.0000(shown in table), 97.9769

**S5 :** Phospho (ST), with neutral losses 0.0000(shown in table), 97.9769

**S7 :** Phospho (ST), with neutral losses 0.0000(shown in table), 97.9769

**M22 :** Oxidation (M), with neutral losses 0.0000(shown in table), 63.9983

**Ions Score:** 68 **Expect:** 5.6e-006

**Matched b ions:** b(3), b(4)-98, b(4), b(5)-98, b(5)++, b(5), b(6)-98, b(6), b(6)-196, b(7)-294++, b(7)-294, b(7)-196, b(7)-98, b(8)-294, b(8)-98, b(8)-196++, b(8)-196, b(8), b(9)-98, b(9), b(9)-98++, b(9)++, b(9)-294, b(9)-196, b(10)-98, b(10), b(10)-294, b(11)-196++, b(11)-294, b(11), b(11)-294++, b(11)-98++, b(11)-196, b(11)-98, b(12), b(12)-294++, b(12)-98++, b(12)++, b(12)-196++, b(12)-294, b(12)-98, b(13), b(13)++, b(13)-98, b(13)-294++, b(13)-98++, b(13)-196++, b(13)-294, b(13)-196, b(14)-98, b(14)-98++, b(14)-196, b(14)-196++, b(14)-294++, b(14)++, b(14)-294, b(15), b(15)++, b(15)-98++, b(16), b(16)-98++, b(16)++, b(17)-98, b(17)++, b(17)-196++, b(17)-294++, b(17)-98++, b(18)-196++, b(18)-98++, b(18)++, b(19)-294++, b(19)-196++, b(19)-98++, b(19)++, b(20)-98++, b(20)-294++, b(20)-196++, b(20)++, b(21)-294++, b(21)-98++, b(22)-294++, b(22)++, b(22)-196++, b(22)-98++, b(23)++, b(23)-294++, b(23)-196++, b(23)-98++, b(24)++, b(24)-98++, b(24)-294++, b(24)-196++, b(25)++, b(25)-294++, b(25)-196++, b(25)-98++

**Matched y ions:** y(3), y(4), y(5), y(6), y(7)++, y(7), y(8)++, y(8), y(9), y(10)++, y(10), y(11), y(11)++, y(12), y(12)++, y(13)++, y(13), y(14)++, y(14), y(15), y(15)++, y(16)++, y(17)++, y(18)++, y(19)++, y(20)++, y(20)-98++, y(21)-98++, y(21)++, y(22)++, y(22)-196++, y(22)-98++, y(23)++, y(23)-98++, y(24)-294++, y(24)-98++, y(25)-98++, y(25)-196++, y(25)-294++, y(25)++

**Precursor origin neutral loss:** +

# Peptide No.988

**SRTLQSSESGTLPSPGPPGHTMEVSC**

Confirmed sites: @S:1,@T:3

Ambiguous sites:

MS/MS Fragmentation of **SRTLQSSESGTLPSPGPPGHTMEVSC**

Found in **NDRG2\_MOUSE**, Protein NDRG2 OS=Mus musculus GN=Ndr2 PE=1 SV=1

Match to Query 6757: 2876.177658 from(959.733162,3+)

Title: Elution from: 43.149 to 43.149 scan no 3779 cid35.00 polarity:+:MA10:m1s

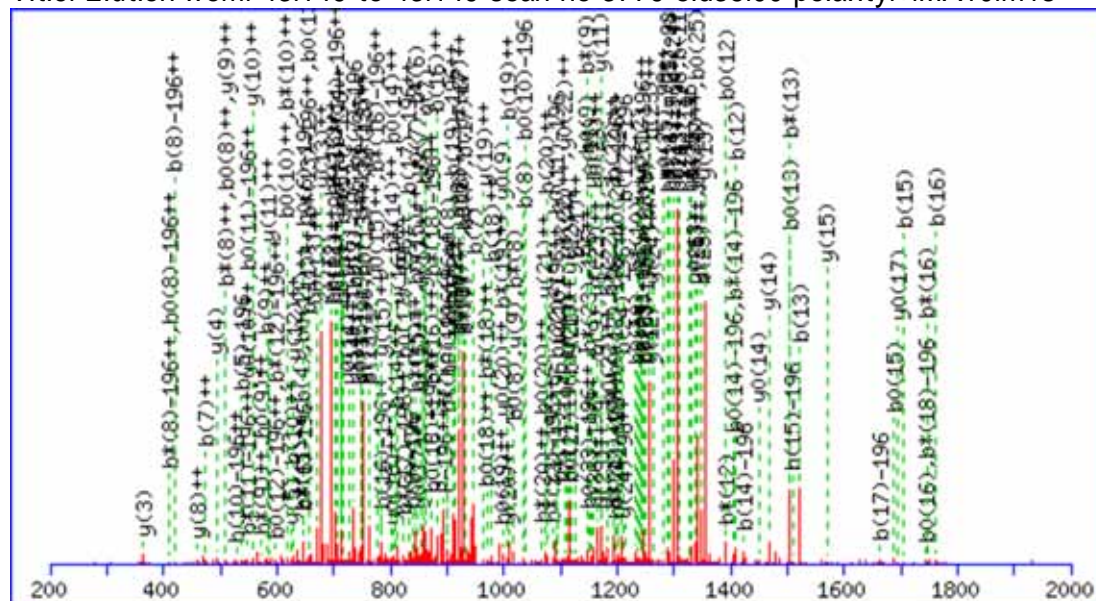

**Monoisotopic mass of neutral peptide Mr(calc): 2876.1759**

**Fixed modifications:** Carbamidomethyl (C) (apply to specified residues or termini only)

**Variable modifications:**

**N-term :** Dimethyl (N-term)

**S1 :** Phospho (ST), with neutral losses 0.0000(shown in table), 97.9769

**T3 :** Phospho (ST), with neutral losses 0.0000(shown in table), 97.9769

**Ions Score:** 74 **Expect:** 2.1e-006

**Matched b ions:** b(4), b(4)-98, b(5)-98, b(5)-196, b(6), b(6)-98, b(7)++, b(7)-196, b(7), b(7)-98, b(8)-196++, b(8)-196, b(8)-98, b(8), b(9), b(9)++, b(9)-98, b(10), b(10)-196++, b(10)++, b(10)-98, b(11)++, b(11)-196, b(11)-98, b(11), b(12), b(12)-98++, b(12)++, b(12)-196, b(12)-98, b(13), b(13)-98, b(13)++, b(13)-98++, b(13)-196, b(14)-98, b(14)-196, b(14)-98++, b(14)-196++, b(14)++, b(15)-98++, b(15)++, b(15)-196, b(15), b(16), b(16)-98, b(16)++, b(16)-196++, b(16)-98++, b(17)-196, b(17)-98, b(17)-98++, b(17)-196++, b(17)++, b(18)++, b(18)-98++, b(19)-196++, b(19)++, b(20)++, b(20)-98++, b(21)-98++, b(21)++, b(22)++, b(22)-196++, b(22)-98++, b(23)++, b(23)-98++, b(23)-196++, b(24)-98++, b(24)++, b(24)-196++, b(25)++, b(25)-196++, b(25)-98++

**Matched y ions:** y(3), y(4), y(5), y(6), y(7), y(8)++, y(8), y(9), y(9)++, y(10), y(10)++, y(11), y(11)++, y(12), y(12)++, y(13)++, y(13), y(14), y(14)++, y(15)++, y(15), y(16)++, y(17)++, y(18)++, y(19)++, y(20)++, y(21)++, y(22)++, y(23)++, y(24)-98++, y(24)++, y(25)++, y(25)-98++

**Precursor origin neutral loss:** +

# Peptide No.989

**SRTLQSSSESGTLPSPGPPGHTMEVSC**

Confirmed sites: @S:1,@T:3,@S:5

Ambiguous sites:

MS/MS Fragmentation of **SRTLQSSSESGTLPSPGPPGHTMEVSC**

Found in **NDRG2\_MOUSE**, Protein NDRG2 OS=Mus musculus GN=NdrG2 PE=1 SV=1

Match to Query 6863: 2956.143444 from(986.388424,3+)

Title: Elution from: 46.789 to 46.789 scan no 4219 cid35.00 polarity:+:MA10:m1s

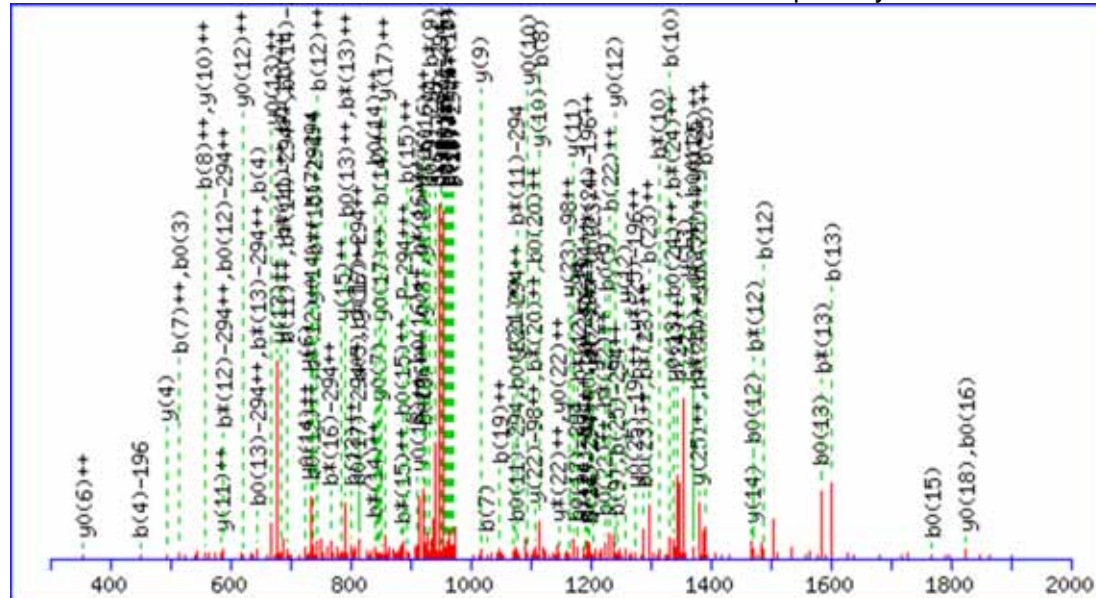

**Monoisotopic mass of neutral peptide Mr(calc): 2956.1422**

**Fixed modifications:** Carbamidomethyl (C) (apply to specified residues or termini only)

**Variable modifications:**

**N-term :** Dimethyl (N-term)

**S1 :** Phospho (ST), with neutral losses 0.0000(shown in table), 97.9769

**T3 :** Phospho (ST), with neutral losses 0.0000(shown in table), 97.9769

**S5 :** Phospho (ST), with neutral losses 0.0000(shown in table), 97.9769

**Ions Score:** 37 **Expect:** 0.0071

**Matched b ions:** b(4)-196, b(4), b(5), b(5)-196, b(6), b(6)-196, b(6)-98, b(7)++, b(7)-294, b(7)-98, b(7), b(8), b(8)++, b(8)-98, b(9)-196++, b(9)-98, b(9)-196, b(9)-294, b(9), b(10)-98, b(10)-98++, b(10), b(11)-98++, b(11)++, b(12)-294, b(12), b(12)++, b(13)-98, b(13), b(13)++, b(13)-98++, b(14)-98, b(14)-98++, b(14)-196++, b(14)++, b(15)-98++, b(15)++, b(16)-98++, b(16)++, b(17)-98++, b(17)++, b(17)-196++, b(18)-196++, b(18)-98++, b(19)-196++, b(19)++, b(20)-294++, b(22)++, b(23)++, b(23)-98++, b(24)++, b(24)-98++, b(24)-196++, b(24)-294++, b(25)++, b(25)-98++, b(25)-294++

**Matched y ions:** y(4), y(6), y(8), y(9), y(10), y(10)++, y(11), y(11)++, y(12), y(13)++, y(13), y(14), y(14)++, y(15)++, y(16)++, y(17)++, y(18)++, y(19)++, y(21)++, y(22)-98++, y(23)-98++, y(25)++, y(25)-98++

**Precursor origin neutral loss:** +



# Peptide No.990

**SRTLQSSSESGTLPSPGPPGHTMEVSC**

Confirmed sites: @S:5,@S:7

Ambiguous sites:

MS/MS Fragmentation of **SRTLQSSSESGTLPSPGPPGHTMEVSC**

Found in **NDRG2\_MOUSE**, Protein NDRG2 OS=Mus musculus GN=NdrG2 PE=1 SV=1

Match to Query 7046: 2876.179116 from(959.733648,3+)

Title: Elution from: 42.921 to 42.921 scan no 3833 cid35.00 polarity:+:MA10:m1s

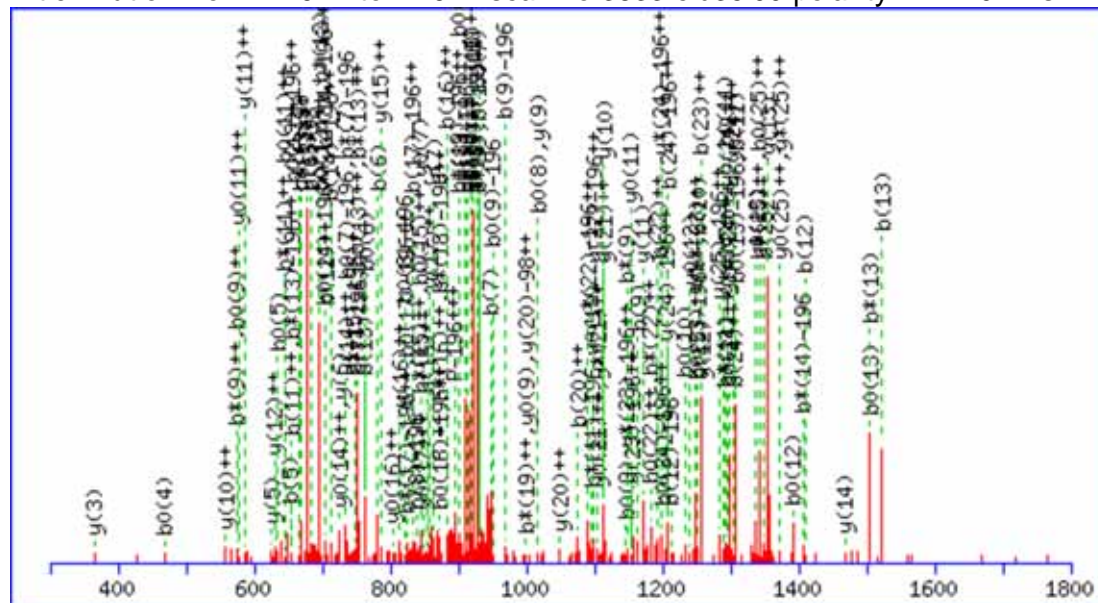

**Monoisotopic mass of neutral peptide Mr(calc): 2876.1759**

**Fixed modifications:** Carbamidomethyl (C) (apply to specified residues or termini only)

**Variable modifications:**

**N-term :** Dimethyl (N-term)

**S5 :** Phospho (ST), with neutral losses 0.0000(shown in table), 97.9769

**S7 :** Phospho (ST), with neutral losses 0.0000(shown in table), 97.9769

**Ions Score:** 42 **Expect:** 0.0041

**Matched b ions:** b(5), b(6), b(6)-98, b(7)-196, b(7), b(7)-98, b(8)-98++, b(8)-196, b(8)-98, b(9)-196, b(9), b(9)-98, b(10)-98++, b(10)-98, b(10), b(11)++, b(11), b(12), b(12)++, b(12)-196, b(13), b(13)++, b(13)-98, b(13)-98++, b(14)-98, b(14)-98++, b(14)-196++, b(15)-98++, b(15)++, b(16)-98++, b(16)++, b(17)-196++, b(17)-98++, b(17)++, b(18)-98++, b(19)-196++, b(20)++, b(21)-98++, b(22)++, b(22)-98++, b(23)++, b(23)-98++, b(24)-98++, b(24)++, b(24)-196++, b(25)++, b(25)-196++, b(25)-98++

**Matched y ions:** y(3), y(5), y(6), y(7), y(8), y(9), y(10)++, y(10), y(11), y(11)++, y(12)++, y(12), y(13)++, y(13), y(14)++, y(14), y(15)++, y(16)++, y(17)++, y(18)++, y(20)++, y(20)-98++, y(21)++, y(22)-196++, y(22)-98++, y(23)-196++, y(23)-98++, y(24)-196++, y(24)++, y(25)-196++, y(25)-98++

**Precursor origin neutral loss:** +

# Peptide No.991



# SRTLQSSESGTLPSPGPPGHTMEVSC

Confirmed sites: @T:3,@S:5

Ambiguous sites:

MS/MS Fragmentation of **SRTLQSSESGTLPSPGPPGHTMEVSC**

Found in **NDRG2\_MOUSE**, Protein NDRG2 OS=Mus musculus GN=NdrG2 PE=1 SV=1

Match to Query 7045: 2876.177280 from(959.733036,3+)

Title: Elution from: 43.272 to 43.272 scan no 3876 cid35.00 polarity:+:MA10:m1s

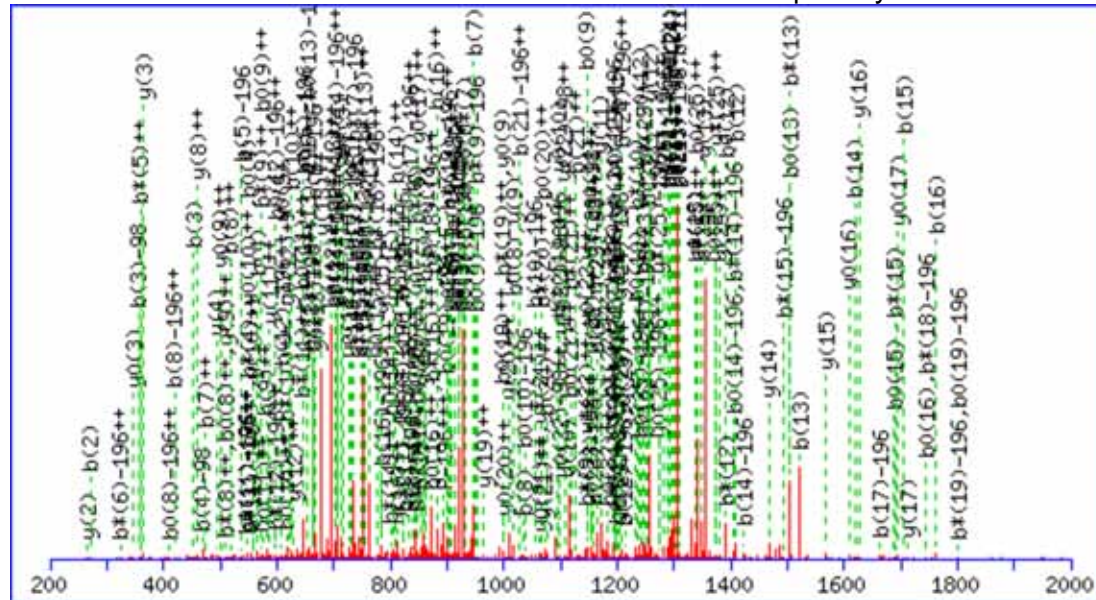

**Monoisotopic mass of neutral peptide Mr(calc): 2876.1759**

**Fixed modifications:** Carbamidomethyl (C) (apply to specified residues or termini only)

**Variable modifications:**

**N-term :** Dimethyl (N-term)

**T3 :** Phospho (ST), with neutral losses 0.0000(shown in table), 97.9769

**S5 :** Phospho (ST), with neutral losses 0.0000(shown in table), 97.9769

**Ions Score: 66 Expect: 1.5e-005**

**Matched b ions:** b(2), b(3)-98, b(3), b(4)-98, b(4), b(5)-98, b(5)-196, b(5), b(6), b(6)-196, b(6)-98, b(7)-98++, b(7)-196, b(7), b(7)++, b(7)-98, b(8)-98++, b(8), b(8)-196++, b(8)++, b(8)-196, b(8)-98, b(9), b(9)++, b(9)-98++, b(9)-98, b(10)++, b(10)-196, b(10), b(10)-98++, b(10)-98, b(11)++, b(11)-196++, b(11)-98, b(11), b(12), b(12)-98++, b(12)++, b(12)-196++, b(12)-196, b(12)-98, b(13), b(13)++, b(13)-98, b(13)-98++, b(13)-196++, b(14)-98, b(14)-98++, b(14)-196, b(14)-196++, b(14), b(14)++, b(15)-98, b(15), b(15)++, b(15)-98++, b(15)-196++, b(16), b(16)++, b(16)-98, b(16)-196++, b(16)-98++, b(17)-98, b(17)-196, b(17)-98++, b(17)-196++, b(17)++, b(18)-98++, b(19)-196++, b(20)-98++, b(20)++, b(21)-196++, b(21)-98++, b(21)++, b(22)++, b(22)-98++, b(23)++, b(23)-196++, b(23)-98++, b(24)-98++, b(24)++, b(24)-196++, b(25)++, b(25)-196++, b(25)-98++

**Matched y ions:** y(2), y(3), y(4), y(6), y(7), y(8)++, y(8), y(9), y(9)++, y(10), y(10)++, y(11), y(11)++, y(12), y(12)++, y(13)++, y(13), y(14)++, y(14), y(15), y(15)++, y(16)++, y(16), y(17)++, y(17), y(18)++, y(19)++, y(20)++, y(21)++, y(22)++, y(22)-98++, y(23)-98++, y(23)++, y(24)-196++, y(24)-98++, y(24)++, y(25)-98++, y(25)-196++, y(25)++

**Precursor origin neutral loss: +**



# Peptide No.993

**SRTLQSSESGTLPSPGPPGHTMEVSC**

Confirmed sites: @S:5,@S:7,@S:8

Ambiguous sites:

MS/MS Fragmentation of **SRTLQSSESGTLPSPGPPGHTMEVSC**

Found in **NDRG2\_MOUSE**, Protein NDRG2 OS=Mus musculus GN=Ndr2 PE=1 SV=1

Match to Query 6895: 2978.168984 from(1490.091768,2+)

Title: Elution from: 40.466 to 40.466 scan no 3422 cid35.00 polarity:+:MA10:m1s

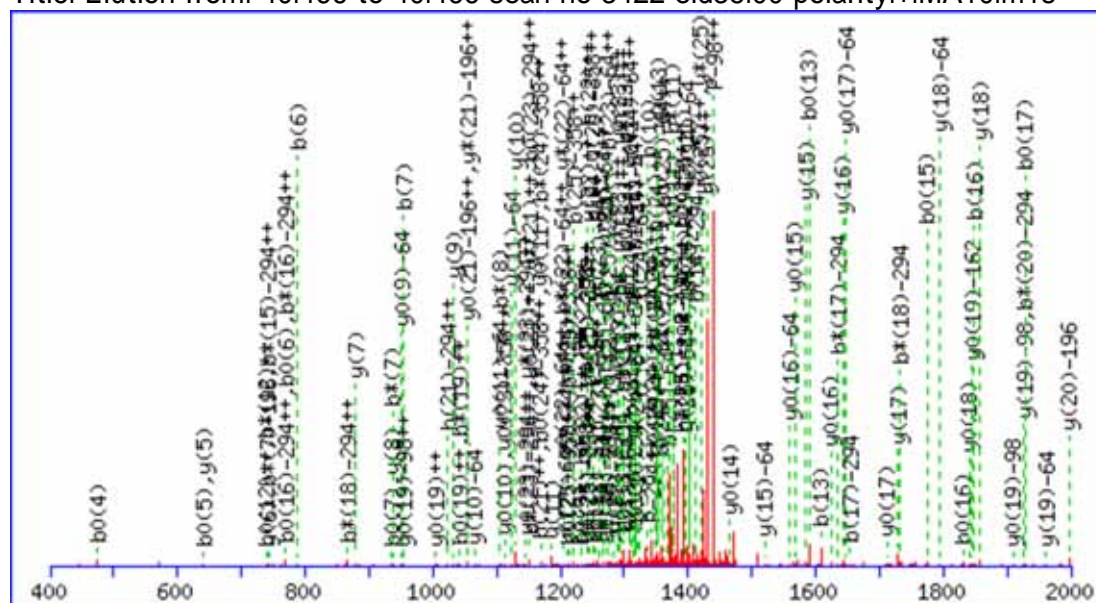

**Monoisotopic mass of neutral peptide Mr(calc): 2978.1690**

**Fixed modifications:** Carbamidomethyl (C) (apply to specified residues or termini only)

**Variable modifications:**

**N-term :** Dimethyl:2H(4)13C(2) (N-term)

**S5 :** Phospho (ST), with neutral losses 0.0000(shown in table), 97.9769

**S7 :** Phospho (ST), with neutral losses 0.0000(shown in table), 97.9769

**S8 :** Phospho (ST), with neutral losses 0.0000(shown in table), 97.9769

**M22 :** Oxidation (M), with neutral losses 0.0000(shown in table), 63.9983

**Ions Score: 46 Expect: 0.0011**

**Matched b ions:** b(6), b(7), b(8)-98, b(9)-196, b(9)-98, b(9), b(10), b(10)-196, b(10)-98, b(11)-98, b(11), b(12)-196, b(12)-98, b(13), b(13)-98, b(13)-294, b(13)-196, b(14)-98, b(14)-196, b(14)-294, b(16), b(16)-196, b(16)-98, b(17)-98, b(17)-294, b(17)-196, b(21)-294++, b(21)++, b(21)-196++, b(22)-98++, b(22)-196++, b(22)++, b(23)++, b(23)-196++, b(23)-98++, b(24)-98++, b(24)-294++, b(24)-196++, b(24)++, b(25)-98++, b(25)++

**Matched y ions:** y(5), y(6), y(7), y(8), y(9), y(10), y(11), y(12), y(13), y(15), y(16), y(17), y(18), y(19)-98, y(20)-196, y(21)-98++, y(22)++, y(23)-196++, y(24)-98++, y(24)++, y(25)-294++, y(25)-196++, y(25)-98++, y(25)++

**Precursor origin neutral loss: +**



# Peptide No.994

**SRTLQSSESGTLPSGPPGHTMEVSC**

Confirmed sites: @T:3,@S:5

Ambiguous sites:

MS/MS Fragmentation of **SRTLQSSESGTLPSGPPGHTMEVSC**

Found in **NDRG2\_MOUSE**, Protein NDRG2 OS=Mus musculus GN=Ndr2 PE=1 SV=1

Match to Query 6577: 2898.205035 from(967.075621,3+)

Title: Elution from: 37.932 to 37.932 scan no 3155 cid35.00 polarity:+:MA10:m1s

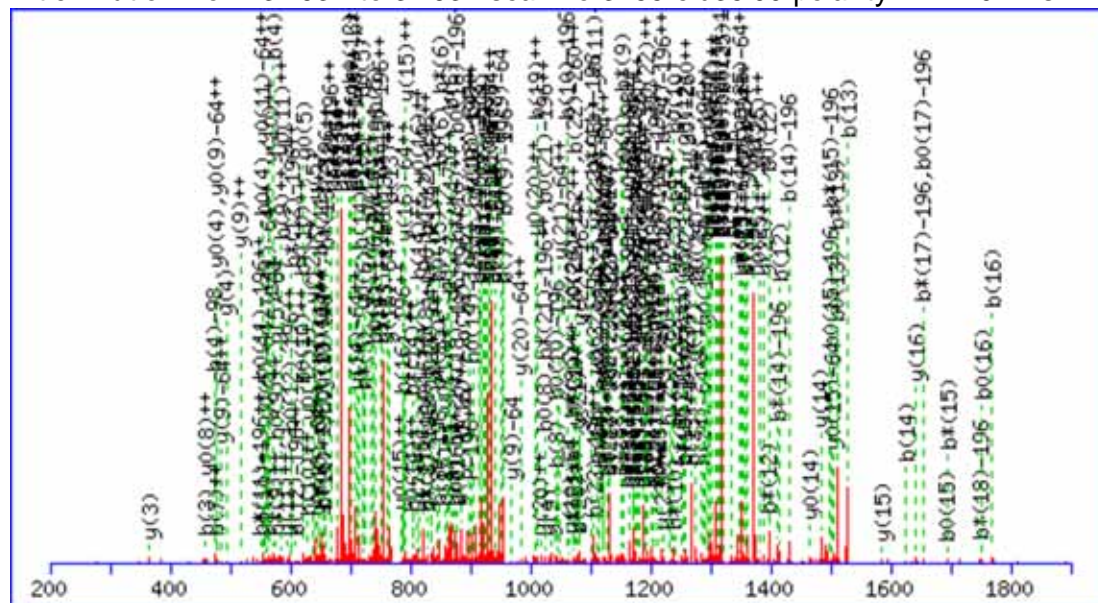

**Monoisotopic mass of neutral peptide Mr(calc): 2898.2026**

**Fixed modifications:** Carbamidomethyl (C) (apply to specified residues or termini only)

**Variable modifications:**

**N-term :** Dimethyl:2H(4)13C(2) (N-term)

**T3 :** Phospho (ST), with neutral losses 0.0000(shown in table), 97.9769

**S5 :** Phospho (ST), with neutral losses 0.0000(shown in table), 97.9769

**M22 :** Oxidation (M), with neutral losses 0.0000(shown in table), 63.9983

**Ions Score:** 69 **Expect:** 7.8e-006

**Matched b ions:** b(3), b(4)-98, b(4), b(5)-98, b(5), b(6), b(6)-98++, b(6)-98, b(7), b(7)-98, b(7)++, b(8), b(8)-196, b(8)-98, b(9), b(9)-98++, b(9)++, b(9)-98, b(10)++, b(10)-196, b(10)-98, b(10), b(11)++, b(11)-98, b(11), b(12)-98, b(12), b(12)-196, b(12)-196++, b(12)-98++, b(12)++, b(13)-98, b(13), b(13)++, b(13)-98++, b(13)-196++, b(13)-196, b(14)-196, b(14)-98, b(14), b(14)-196++, b(14)-98++, b(14)++, b(15)++, b(15)-98++, b(16), b(16)++, b(16)-196++, b(16)-98++, b(17)++, b(17)-98, b(17)-98++, b(17)-196++, b(18)-98++, b(18)-196++, b(19)++, b(19)-196++, b(20)-98++, b(20)++, b(21)++, b(21)-98++, b(22)-196++, b(22)++, b(22)-98++, b(23)++, b(23)-196++, b(23)-98++, b(24)-98++, b(24)++, b(24)-196++, b(25)-98++, b(25)++

**Matched y ions:** y(3), y(4), y(5), y(6), y(7), y(8), y(9), y(9)++, y(10), y(10)++, y(11), y(11)++, y(12), y(12)++, y(13)++, y(13), y(14)++, y(14), y(15), y(15)++, y(16), y(16)++, y(17)++, y(18)++, y(20)++, y(21)++, y(22)++, y(22)-98++, y(23)-98++, y(23)++, y(24)++, y(25)++, y(25)-196++

**Precursor origin neutral loss:** +



# Peptide No.995

**SRTLQSSSESGTLPSPGPPGHTMEVSC**

Confirmed sites: @T:3,@S:5,@S:7

Ambiguous sites:

MS/MS Fragmentation of **SRTLQSSSESGTLPSPGPPGHTMEVSC**

Found in **NDRG2\_MOUSE**, Protein NDRG2 OS=Mus musculus GN=NdrG2 PE=1 SV=1

Match to Query 6639: 2978.169153 from(993.730327,3+)

Title: Elution from: 40.189 to 40.189 scan no 3440 cid35.00 polarity:+:MA10:m1s

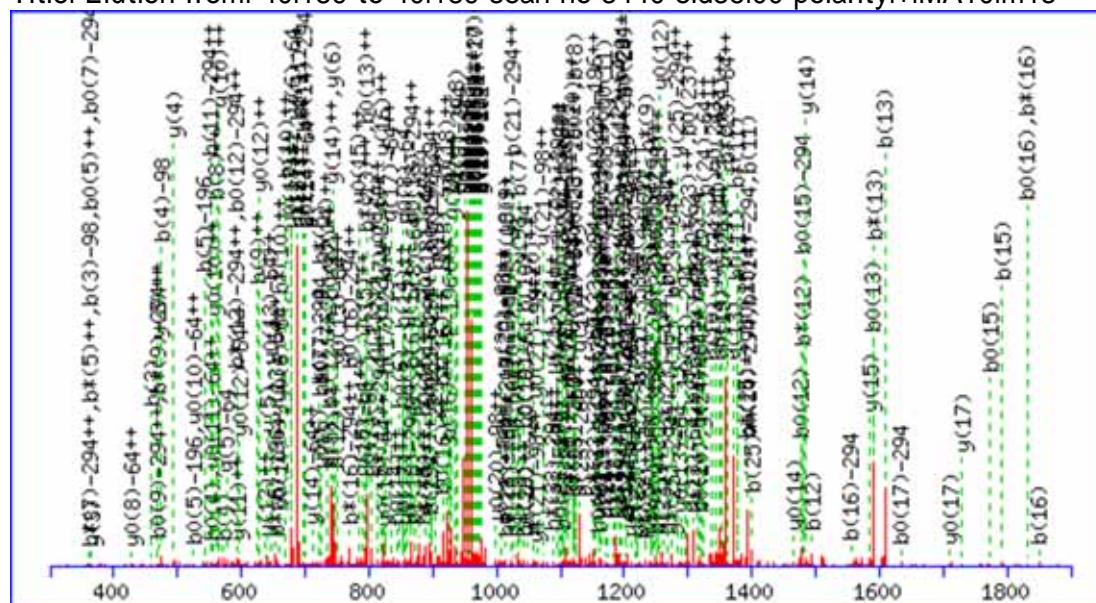

**Monoisotopic mass of neutral peptide Mr(calc): 2978.1690**

**Fixed modifications:** Carbamidomethyl (C) (apply to specified residues or termini only)

**Variable modifications:**

**N-term :** Dimethyl:2H(4)13C(2) (N-term)

**T3 :** Phospho (ST), with neutral losses 0.0000(shown in table), 97.9769

**S5 :** Phospho (ST), with neutral losses 0.0000(shown in table), 97.9769

**S7 :** Phospho (ST), with neutral losses 0.0000(shown in table), 97.9769

**M22 :** Oxidation (M), with neutral losses 0.0000(shown in table), 63.9983

**Ions Score:** 57 **Expect:** 7.5e-005

**Matched b ions:** b(3)-98, b(3), b(4)-98, b(4), b(5), b(5)-98, b(5)-196, b(6), b(6)-98++, b(6)-98, b(7)-196++, b(7), b(7)-98, b(7)-98++, b(7)-196, b(8), b(8)-98++, b(8)++, b(8)-196, b(8)-98, b(9)-98, b(9)-98++, b(9), b(9)++, b(9)-294, b(10)++, b(10)-294, b(10)-98, b(10), b(11)-294++, b(11)-196++, b(11)++, b(11)-294, b(11)-98, b(11), b(12)-196, b(12), b(12)++, b(12)-294, b(13), b(13)-98, b(13)++, b(13)-196++, b(13)-98++, b(13)-294, b(13)-196, b(14)-98, b(14)-98++, b(14)-196, b(14)-196++, b(14)++, b(15), b(15)++, b(15)-98++, b(16), b(16)-98++, b(16)++, b(16)-294, b(17)++, b(17)-294++, b(17)-196++, b(17)-98++, b(18)-98++, b(19)-294++, b(19)-196++, b(19)-98++, b(20)++, b(20)-294++, b(20)-98++, b(21)-98++, b(21)-294++, b(21)-196++, b(21)++, b(22)-294++, b(22)-196++, b(22)-98++, b(22)++, b(23)++, b(23)-98++, b(23)-294++, b(23)-196++, b(24)-98++, b(24)++, b(24)-196++, b(24)-294++, b(25)++, b(25)-196++, b(25)-98++

**Matched y ions:** y(3), y(4), y(5), y(6), y(7), y(8), y(8)++, y(9), y(10)++, y(10), y(11)++, y(11), y(12),

y(12)++, y(13)++, y(13), y(14)++, y(14), y(15), y(15)++, y(16)++, y(17)++, y(17), y(18)++, y(19)++, y(20)++, y(20)-98++, y(21)++, y(21)-98++, y(22)-196++, y(22)++, y(22)-98++, y(23)-196++, y(23)++, y(24)-294++, y(24)-98++, y(24)++, y(25)-294++, y(25)-98++

Precursor origin neutral loss: +

## Peptide No.996

**SRTLQSSESGLPSGPPGHTMEVSC**

Confirmed sites: @S:5,@S:7

Ambiguous sites:

MS/MS Fragmentation of **SRTLQSSESGLPSGPPGHTMEVSC**

Found in **NDRG2\_MOUSE**, Protein NDRG2 OS=Mus musculus GN=NdrG2 PE=1 SV=1

Match to Query 8725: 2882.208315 from(961.743381,3+)

Title: Elution from: 43.045 to 43.045 scan no 4056 cid35.00 polarity:+:MA10:m1s

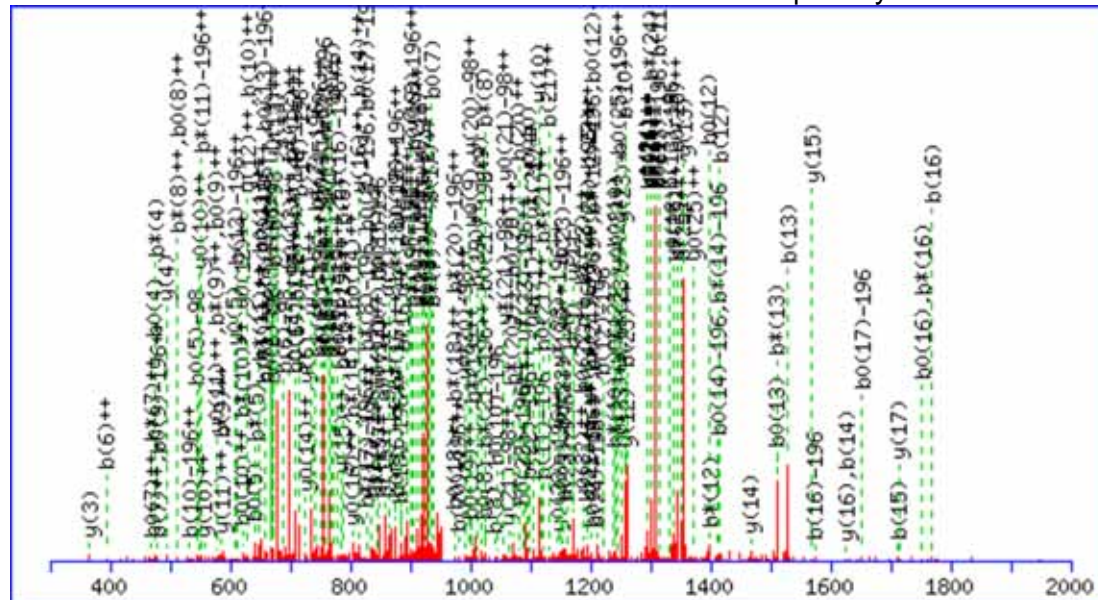

**Monoisotopic mass of neutral peptide Mr(calc): 2882.2077**

**Fixed modifications:** Carbamidomethyl (C) (apply to specified residues or termini only)

**Variable modifications:**

**N-term :** Dimethyl:2H(4)13C(2) (N-term)

**S5 :** Phospho (ST), with neutral losses 0.0000(shown in table), 97.9769

**S7 :** Phospho (ST), with neutral losses 0.0000(shown in table), 97.9769

**Ions Score: 50 Expect: 0.00075**

**Matched b ions:** b(5), b(6)++, b(6)-98, b(6), b(7)-98, b(7)++, b(7)-196, b(8)-98, b(8), b(8)-196, b(9)-98, b(9), b(9)++, b(10)-98, b(10)-98++, b(10)-196++, b(10)++, b(10), b(11)++, b(11)-196, b(11), b(12)-98++, b(12), b(12)-196++, b(12)++, b(12)-196, b(13), b(13)-98, b(13)++, b(13)-98++, b(13)-196++, b(13)-196, b(14)-98, b(14)-98++, b(14)++, b(14), b(14)-196++, b(15)++, b(15), b(15)-196++, b(15)-98++, b(16), b(16)-196, b(16)-98++, b(16)-196++, b(16)++, b(17)-98, b(17)-196++, b(17)-98++, b(17)++, b(18)-196++, b(18)-98++, b(19)-196++, b(19)++, b(20)-196++, b(20)-98++, b(20)++, b(21)++, b(22)++, b(22)-196++, b(22)-98++, b(23)++, b(23)-98++, b(23)-196++, b(24)-98++, b(24)++, b(24)-196++, b(25)++, b(25)-98++

**Matched y ions:** y(3), y(4), y(6), y(7), y(8), y(9), y(10), y(10)++, y(11), y(11)++, y(12), y(12)++, y(13),

y(13)++, y(14), y(14)++, y(15), y(15)++, y(16)++, y(16), y(17)++, y(17), y(18)++, y(20)-98++, y(21)-98++, y(22)-98++, y(22)++, y(23)-196++, y(23)-98++, y(23)++, y(24)++, y(25)-98++

Precursor origin neutral loss: +

## Peptide No.997

**SRTLQSSESGTLPSPGPPGHTMEVSC**

Confirmed sites: @S:7,@S:8

Ambiguous sites:

MS/MS Fragmentation of **SRTLQSSESGTLPSPGPPGHTMEVSC**

Found in **NDRG2\_MOUSE**, Protein NDRG2 OS=Mus musculus GN=Ndr2 PE=1 SV=1

Match to Query 6551: 2882.210367 from(961.744065,3+)

Title: Elution from: 43.049 to 43.049 scan no 3793 cid35.00 polarity:+:MA10:m1s

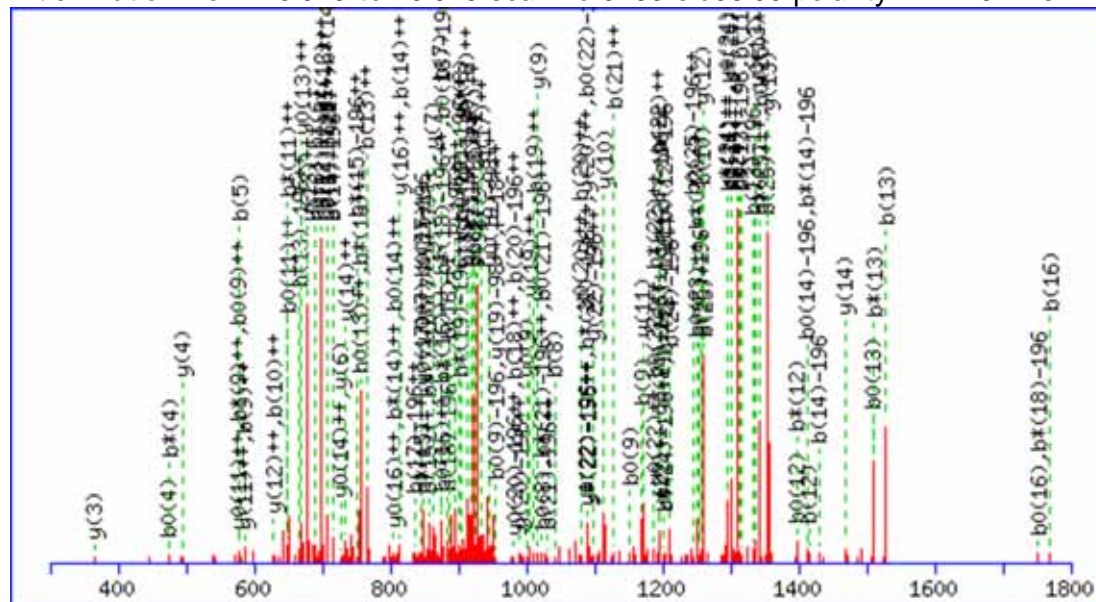

**Monoisotopic mass of neutral peptide Mr(calc): 2882.2077**

**Fixed modifications:** Carbamidomethyl (C) (apply to specified residues or termini only)

**Variable modifications:**

**N-term :** Dimethyl:2H(4)13C(2) (N-term)

**S7 :** Phospho (ST), with neutral losses 0.0000(shown in table), 97.9769

**S8 :** Phospho (ST), with neutral losses 0.0000(shown in table), 97.9769

**Ions Score:** 46 **Expect:** 0.0017

**Matched b ions:** b(5), b(6), b(7), b(8)-98, b(8)-196, b(8), b(9)++, b(9)-98, b(9), b(10)++, b(10)-98++, b(10)-98, b(10), b(11), b(12), b(12)++, b(12)-98++, b(13), b(13)++, b(13)-98, b(13)-98++, b(13)-196++, b(13)-196, b(14)-98, b(14)-98++, b(14)-196, b(14)++, b(14)-196++, b(15)++, b(15)-98++, b(16), b(16)-98++, b(16)++, b(17)-196++, b(17)-98++, b(17)++, b(18)-196++, b(18)-98++, b(18)++, b(19)-196++, b(19)++, b(20)-196++, b(20)++, b(21)-196++, b(21)-98++, b(21)++, b(22)++, b(23)++, b(23)-98++, b(24)-98++, b(24)++, b(24)-196++, b(25)++, b(25)-196++, b(25)-98++

**Matched y ions:** y(3), y(4), y(6), y(7), y(8), y(9), y(10), y(11), y(11)++, y(12), y(12)++, y(13)++, y(13), y(14), y(14)++, y(16)++, y(17)++, y(18)++, y(19)++, y(19)-98++, y(20)-196++, y(20)++, y(22)-196++, y(22)++, y(23)-98++, y(24)-98++, y(25)-98++



Precursor origin neutral loss: +

## Peptide No.998

**SRTLQSSESGTLPSPGPPGHTMEVSC**

Confirmed sites: @S:8,@S:10

Ambiguous sites:

MS/MS Fragmentation of **SRTLQSSESGTLPSPGPPGHTMEVSC**

Found in **NDRG2\_MOUSE**, Protein NDRG2 OS=Mus musculus GN=Ndr2 PE=1 SV=1

Match to Query 7069: 2882.211429 from(961.744419,3+)

Title: Elution from: 43.109 to 43.109 scan no 3857 cid35.00 polarity:+:MA10:m1s

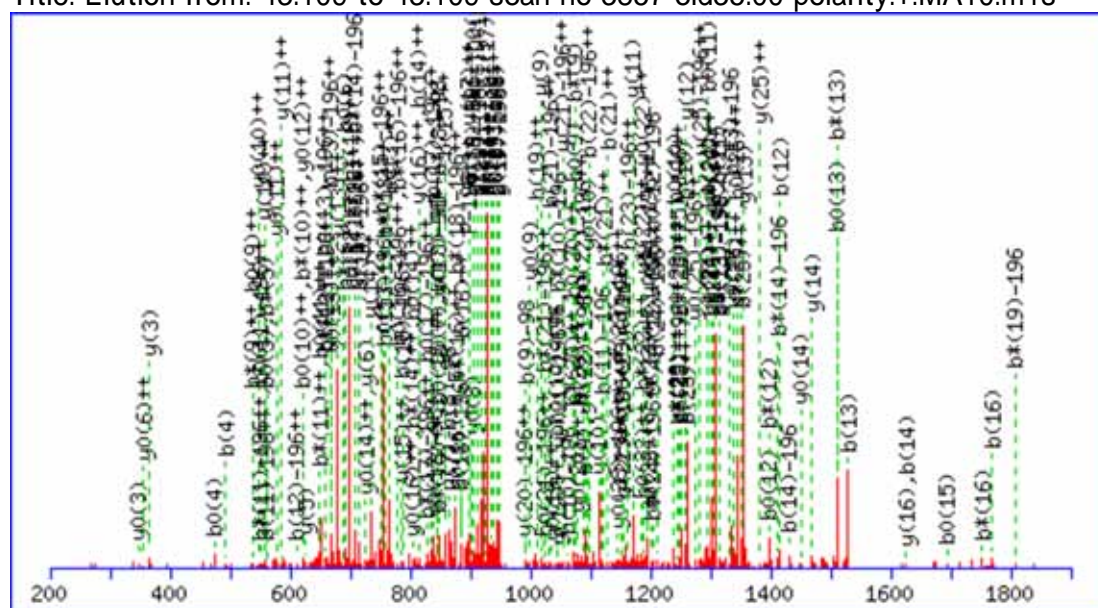

**Monoisotopic mass of neutral peptide Mr(calc): 2882.2077**

**Fixed modifications:** Carbamidomethyl (C) (apply to specified residues or termini only)

**Variable modifications:**

**N-term :** Dimethyl:2H(4)13C(2) (N-term)

**S8 :** Phospho (ST), with neutral losses 0.0000(shown in table), 97.9769

**S10 :** Phospho (ST), with neutral losses 0.0000(shown in table), 97.9769

**Ions Score: 35 Expect: 0.024**

**Matched b ions:** b(4), b(6), b(8)-98, b(9), b(9)-98, b(10)-196, b(10)-98, b(10), b(11)-196++, b(11)++, b(11)-196, b(11), b(12), b(12)-98++, b(12)-196++, b(12)++, b(13), b(13)-98, b(13)++, b(13)-196++, b(13)-98++, b(13)-196, b(14)-98, b(14), b(14)-196, b(14)-98++, b(14)-196++, b(14)++, b(15)++, b(15)-196++, b(15)-98++, b(16), b(16)-196++, b(16)-98++, b(16)++, b(17)-196++, b(17)-98++, b(17)++, b(18)-196++, b(18)-98++, b(19)-196++, b(19)++, b(20)-98++, b(20)++, b(21)-196++, b(21)-98++, b(21)++, b(22)++, b(22)-196++, b(22)-98++, b(23)++, b(23)-196++, b(23)-98++, b(24)-98++, b(24)++, b(24)-196++, b(25)++, b(25)-98++

**Matched y ions:** y(3), y(5), y(6), y(7), y(8), y(9), y(10), y(10)++, y(11), y(11)++, y(12), y(13), y(13)++, y(14), y(14)++, y(15)++, y(16), y(16)++, y(17)-98++, y(17)++, y(18)-98++, y(19)-196++, y(19)++, y(20)-196++, y(21)-196++, y(21)++, y(22)-98++, y(22)++, y(23)-98++, y(24)++, y(25)-196++, y(25)-98++, y(25)++



Precursor origin neutral loss: +

## Peptide No.999

**SRTLQSSESGTLPSPGPPGHTMEVSC**

Confirmed sites: @T:3,@S:5

Ambiguous sites:

MS/MS Fragmentation of **SRTLQSSESGTLPSPGPPGHTMEVSC**

Found in **NDRG2\_MOUSE**, Protein NDRG2 OS=Mus musculus GN=Ndr2 PE=1 SV=1

Match to Query 7411: 2882.207754 from(961.743194,3+)

Title: Elution from: 43.161 to 43.161 scan no 3927 cid35.00 polarity:+:MA10:m1s

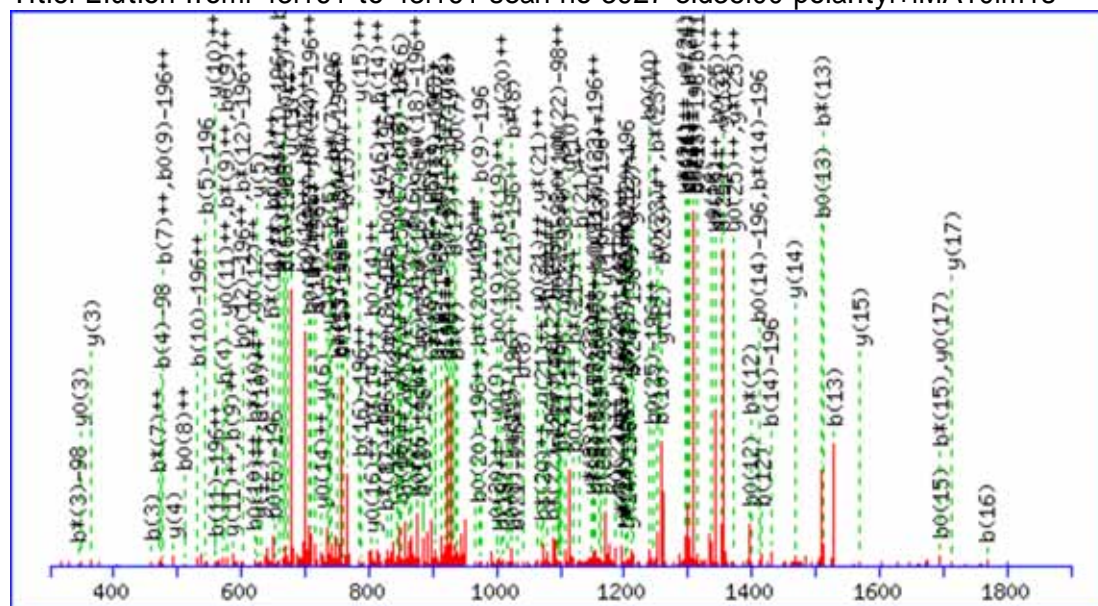

**Monoisotopic mass of neutral peptide Mr(calc): 2882.2077**

**Fixed modifications:** Carbamidomethyl (C) (apply to specified residues or termini only)

**Variable modifications:**

**N-term :** Dimethyl:2H(4)13C(2) (N-term)

**T3 :** Phospho (ST), with neutral losses 0.0000(shown in table), 97.9769

**S5 :** Phospho (ST), with neutral losses 0.0000(shown in table), 97.9769

**Ions Score: 57 Expect: 0.00012**

**Matched b ions:** b(3), b(4)-98, b(4), b(5)-196, b(5)-98, b(5), b(6), b(6)-196, b(6)-98, b(7)-98, b(7)++, b(8)-98, b(8)-196, b(8), b(9)-98, b(9)++, b(9), b(9)-98, b(9)-196, b(10)-196, b(10)++, b(10)-98, b(10), b(11)-196, b(11)++, b(11), b(12)++, b(12)-98, b(12)-98, b(12), b(13), b(13)++, b(13)-98, b(13)-98, b(13)-196, b(14)-98, b(14)-98, b(14)-196, b(14)-196, b(14)++, b(15)++, b(15)-196, b(15)-98, b(16), b(16)-98, b(16)++, b(16)-196, b(16)-98, b(17)-98, b(17)-196, b(17)++, b(18)-196, b(18)-98, b(19)-196, b(19)++, b(20)++, b(21)-196, b(21)-98, b(21)++, b(22)++, b(22)-196, b(22)-98, b(23)++, b(23)-98, b(23)-196, b(24)++, b(24)-98, b(24)-196, b(25)++, b(25)-98

**Matched y ions:** y(3), y(4), y(5), y(6), y(7), y(8), y(9), y(10), y(10)++, y(11), y(11)++, y(12), y(12)++, y(13)++, y(13), y(14)++, y(14), y(15), y(15)++, y(16)++, y(17)++, y(17), y(18)++, y(19)++, y(20)++, y(21)++, y(22)++, y(22)-98, y(23)++, y(23)-98, y(24)++, y(24)-196



Precursor origin neutral loss: +

## Peptide No.1001

**SRTSVQTEDDQLIAGQSAR**

Confirmed sites: @T:3,@S:4

Ambiguous sites:

MS/MS Fragmentation of **SRTSVQTEDDQLIAGQSAR**

Found in **CTNA1\_MOUSE**, Catenin alpha-1 OS=Mus musculus GN=Ctnna1 PE=1 SV=1

Match to Query 6861: 2248.973490 from(750.665106,3+)

Title: Elution from: 36.904 to 36.904 scan no 3249 cid35.00 polarity:+:MA10:m1s

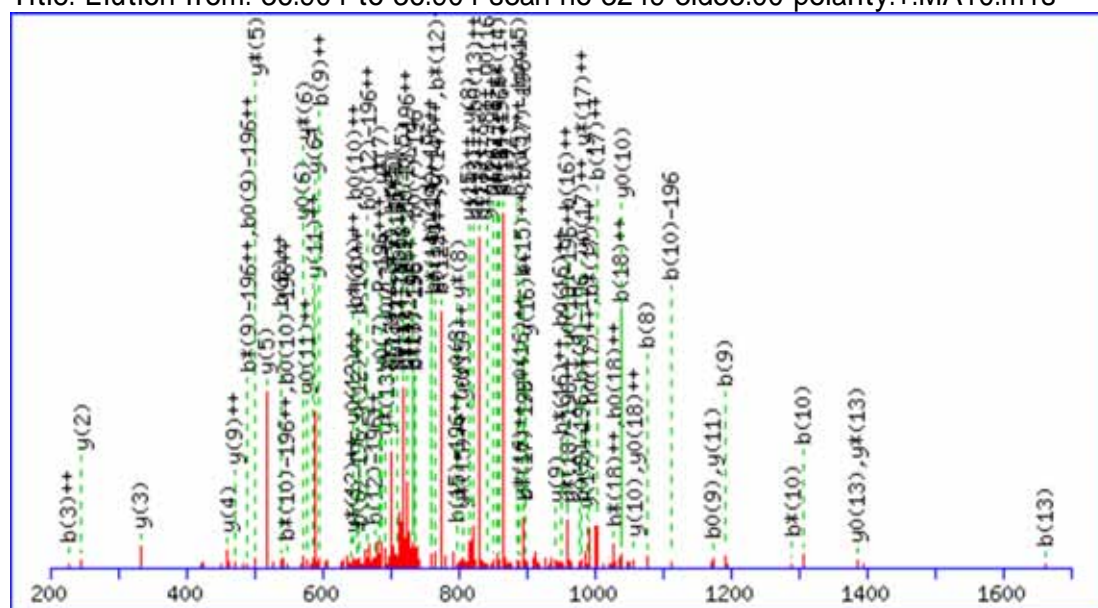

**Monoisotopic mass of neutral peptide Mr(calc): 2248.9726**

**Fixed modifications:** Carbamidomethyl (C) (apply to specified residues or termini only)

**Variable modifications:**

**N-term :** Dimethyl (N-term)

**T3 :** Phospho (ST), with neutral losses 0.0000(shown in table), 97.9769

**S4 :** Phospho (ST), with neutral losses 0.0000(shown in table), 97.9769

**Ions Score: 64 Expect: 2.3e-005**

**Matched b ions:** b(3)++, b(5), b(6)-196, b(7)-98++, b(7)-98, b(8), b(8)++, b(8)-98++, b(8)-98, b(9), b(9)++, b(9)-98++, b(10), b(10)-196, b(10)-98++, b(10)++, b(11)++, b(11)-98++, b(12)++, b(12)-98++, b(12)-196++, b(13), b(13)++, b(13)-196++, b(13)-98++, b(14)++, b(14)-98++, b(15)++, b(15)-196++, b(16)++, b(16)-98++, b(16)-196++, b(17)++, b(18)++, b(18)-98++

**Matched y ions:** y(2), y(3), y(4), y(5), y(6), y(7), y(8), y(9)++, y(9), y(10), y(11), y(11)++, y(12)++, y(13)++, y(14)++, y(15)++, y(16)-98++, y(16)++, y(17)++

**Precursor origin neutral loss: +**

# Peptide No.1002

**SSDEENGPPSSPDLDR**

Confirmed sites: @S:2,@S:11

Ambiguous sites:

MS/MS Fragmentation of **SSDEENGPPSSPDLDR**

Found in **AKTS1\_MOUSE**, Proline-rich AKT1 substrate 1 OS=Mus musculus GN=Akt1s1 PE=1 SV=1

Match to Query 4989: 1888.676878 from(945.345715,2+)

Title: Elution from: 33.614 to 33.614 scan no 2798 cid35.00 polarity:+:MA10

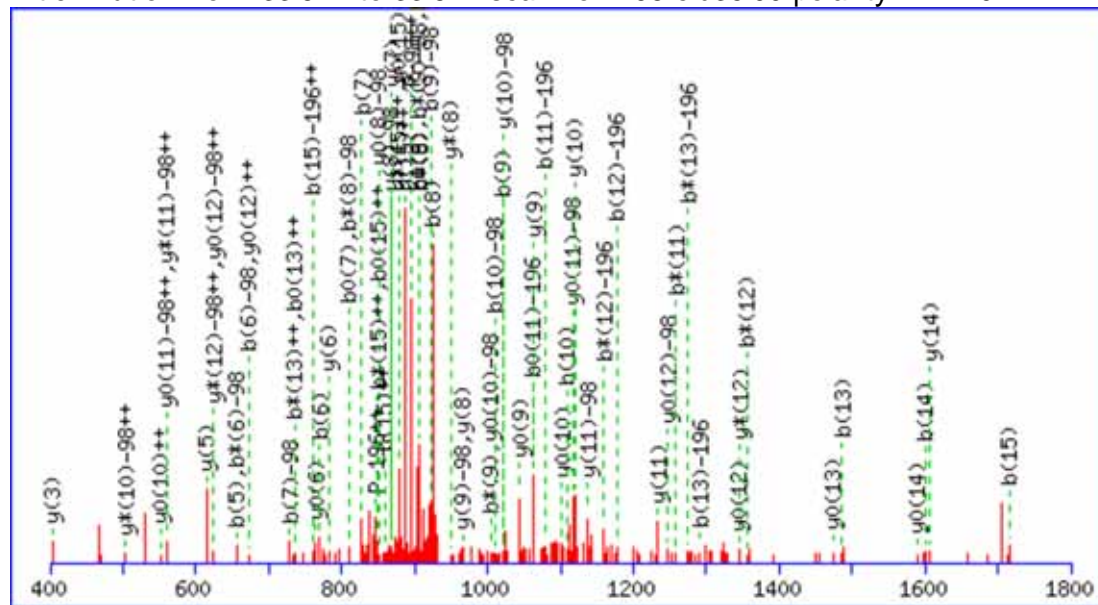

**Monoisotopic mass of neutral peptide Mr(calc): 1888.6765**

**Fixed modifications:** Carbamidomethyl (C) (apply to specified residues or termini only)

**Variable modifications:**

**N-term :** Dimethyl (N-term)

**S2 :** Phospho (ST), with neutral losses 0.0000(shown in table), 97.9769

**S11 :** Phospho (ST), with neutral losses 0.0000(shown in table), 97.9769

**Ions Score: 28 Expect: 0.016**

**Matched b ions:** b(5), b(6), b(6)-98, b(7)-98, b(7), b(8), b(9)-98, b(9), b(10)-98, b(10), b(11)-196,

b(11)-98, b(12)-98, b(12)-196, b(13), b(13)-196, b(14), b(15), b(15)-196++, b(15)-98++, b(15)++

**Matched y ions:** y(3), y(5), y(6), y(7), y(8)-98, y(8), y(9), y(9)-98, y(10), y(10)-98, y(11), y(11)-98, y(14),

y(15)++, y(15)-98++

**Precursor origin neutral loss: +**

# Peptide No.1003

**SSDSEAFETPESTTPVK**

Confirmed sites: @S:2

Ambiguous sites:



MS/MS Fragmentation of **SSDSEEFETPESTTPVK**

Found in **TACC2\_MOUSE**, Transforming acidic coiled-coil-containing protein 2 OS=Mus musculus  
GN=Tacc2 PE=1 SV=2

Match to Query 6010: 2075.881228 from(1038.947890,2+)

Title: Elution from: 40.931 to 40.931 scan no 3790 cid35.00 polarity:+:MA10:m1s

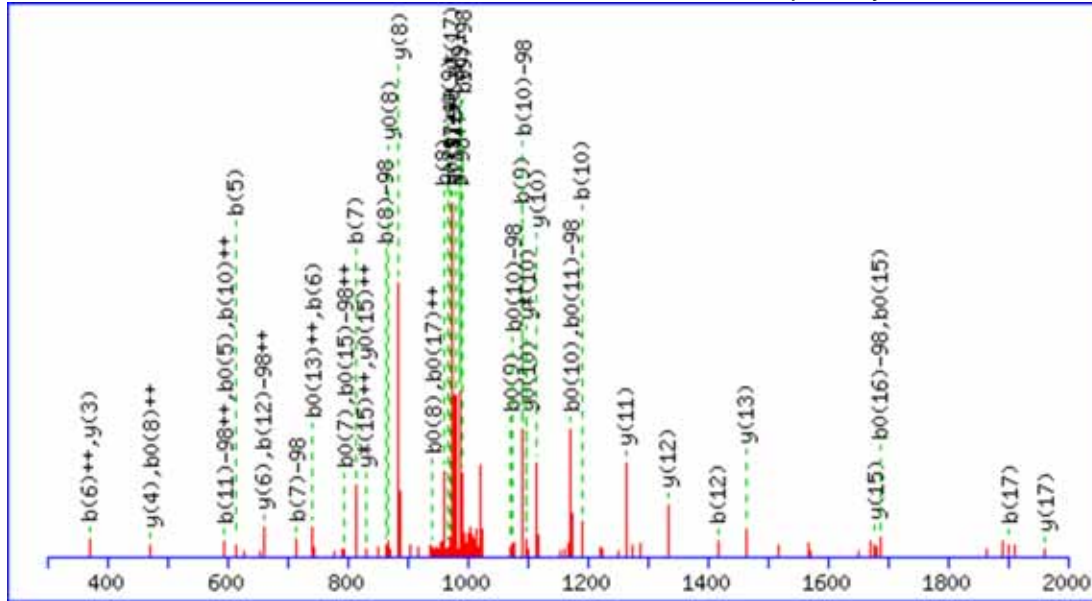

**Monoisotopic mass of neutral peptide Mr(calc):** 2075.8824

**Fixed modifications:** Carbamidomethyl (C) (apply to specified residues or termini only)

**Variable modifications:**

**N-term :** Dimethyl (N-term)

**S2 :** Phospho (ST), with neutral losses 0.0000(shown in table), 97.9769

**K18 :** Dimethyl (K)

**Ions Score:** 67 **Expect:** 9.3e-006

**Matched b ions:** b(5), b(6)++, b(6), b(7), b(7)-98, b(8), b(8)-98, b(9), b(9)-98, b(10)++, b(10)-98, b(10), b(11)-98++, b(12)-98++, b(12), b(17)

**Matched y ions:** y(3), y(4), y(6), y(8), y(9), y(10), y(11), y(12), y(13), y(15), y(17)++, y(17)

**Precursor origin neutral loss:** +

## Peptide No.1004

### SSDSEEFETPESTTPVK

**Confirmed sites:** @S:4

**Ambiguous sites:**

### MS/MS Fragmentation of **SSDSEEFETPESTTPVK**

Found in **TACC2\_MOUSE**, Transforming acidic coiled-coil-containing protein 2 OS=Mus musculus  
GN=Tacc2 PE=1 SV=2

Match to Query 5556: 2075.881484 from(1038.948018,2+)

Title: Elution from: 40.760 to 40.760 scan no 3609 cid35.00 polarity:+:MA10:m1s



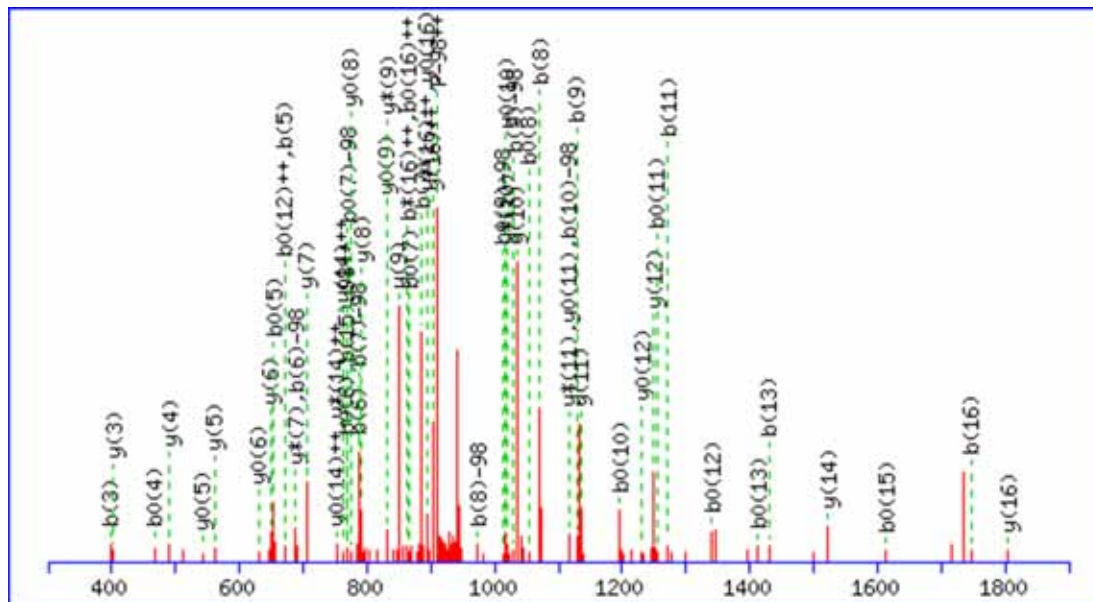

**Monoisotopic mass of neutral peptide Mr(calc):** 1918.7734

**Fixed modifications:** Carbamidomethyl (C) (apply to specified residues or termini only)

**Variable modifications:**

**N-term :** Dimethyl (N-term)

**S2 :** Phospho (ST), with neutral losses 0.0000(shown in table), 97.9769

**K17 :** Dimethyl (K)

**Ions Score:** 83 **Expect:** 1.6e-007

**Matched b ions:** b(3), b(5), b(6), b(6)-98, b(7), b(7)-98, b(8), b(8)-98, b(9), b(9)-98, b(10)-98, b(11), b(13), b(15)-98++, b(16)

**Matched y ions:** y(3), y(4), y(5), y(6), y(7), y(8), y(9), y(10), y(11), y(12), y(14), y(14)++, y(16), y(16)++

**Precursor origin neutral loss:** +

## Peptide No.1006

**SSGGSKDYNLSDGGK**

**Confirmed sites:** @S:1,@Y:8

**Ambiguous sites:**

MS/MS Fragmentation of **SSGGSKDYNLSDGGK**

Found in **SMGC\_MOUSE**, Submandibular gland protein C OS=Mus musculus GN=Muc19 PE=1 SV=1

Match to Query 2842: 1698.718254 from(567.246694,3+)

Title: Elution from: 21.489 to 21.489 scan no 1057 cid35.00 polarity:+:MA10

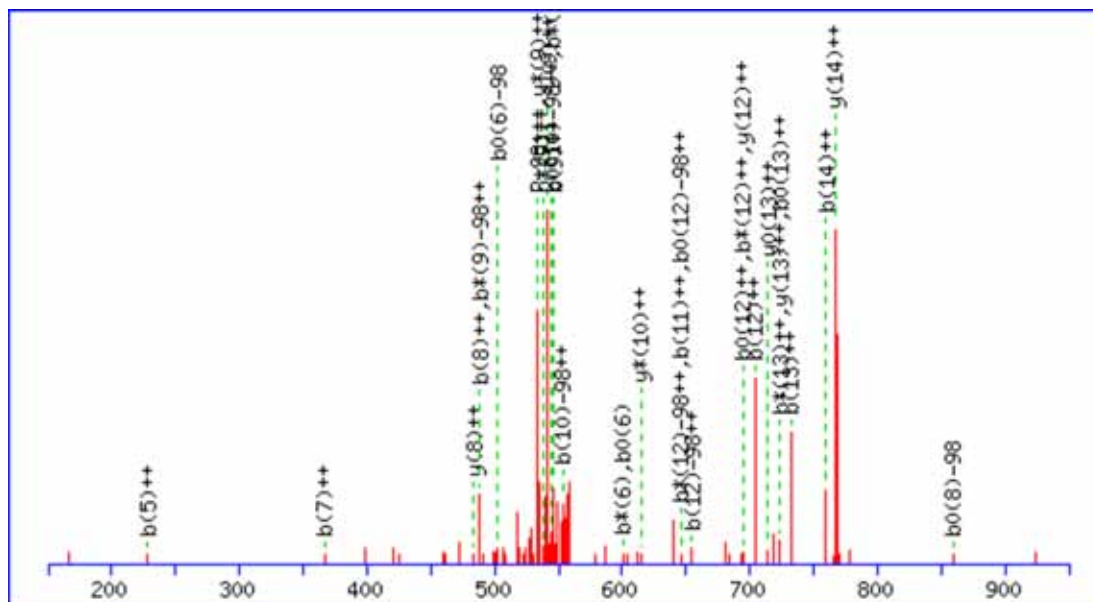

**Monoisotopic mass of neutral peptide Mr(calc):** 1698.7175

**Fixed modifications:** Carbamidomethyl (C) (apply to specified residues or termini only)

**Variable modifications:**

**S1 :** Phospho (ST), with neutral losses 0.0000(shown in table), 97.9769

**K6 :** Dimethyl:2H(4)13C(2) (K)

**Y8 :** Phospho (Y)

**K15 :** Dimethyl:2H(4)13C(2) (K)

**Ions Score:** 30 **Expect:** 0.033

**Matched b ions:** b(5)++, b(7)++, b(8)++, b(9)++, b(10)-98++, b(11)++, b(12)++, b(12)-98++, b(13)++, b(14)++

**Matched y ions:** y(8)++, y(9)++, y(12)++, y(13)++, y(14)++

**Precursor origin neutral loss:** +

## Peptide No.1007

**SSGMDKESVLDKSDLK**

**Confirmed sites:** @S:1,@S:2,@S:8

**Ambiguous sites:**

MS/MS Fragmentation of **SSGMDKESVLDKSDLK**

Found in **ZN148\_MOUSE**, Zinc finger protein 148 OS=Mus musculus GN=Znf148 PE=1 SV=2

Match to Query 6745: 2055.836032 from(514.966284,4+)

Title: Elution from: 33.850 to 33.850 scan no 2759 cid35.00 polarity:+:MA10



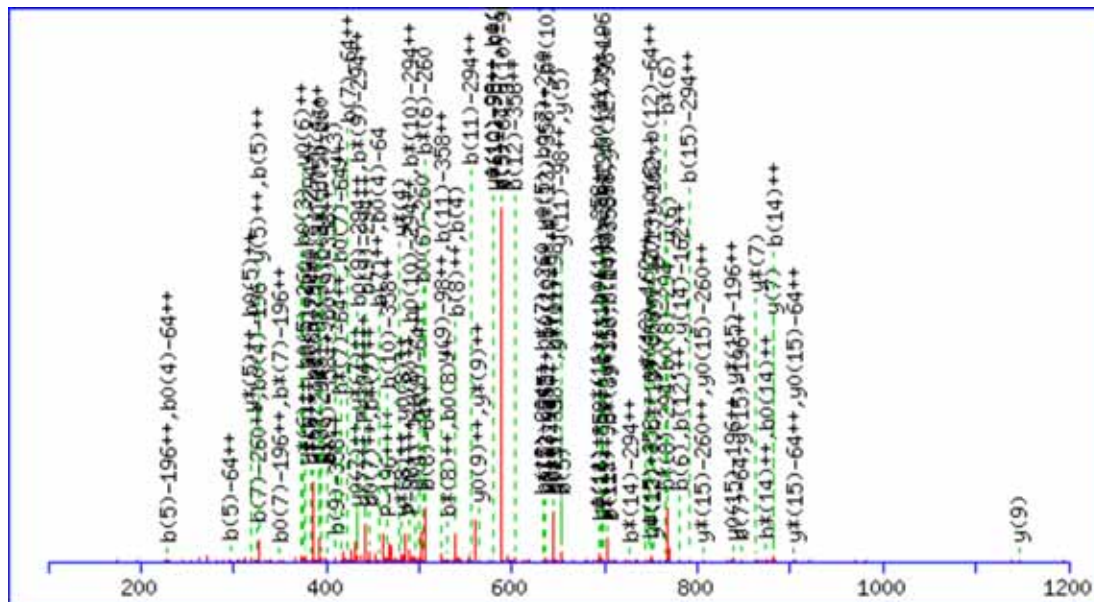

**Monoisotopic mass of neutral peptide Mr(calc):** 2055.8338

**Fixed modifications:** Carbamidomethyl (C) (apply to specified residues or termini only)

**Variable modifications:**

**S1 :** Phospho (ST), with neutral losses 0.0000(shown in table), 97.9769

**S2 :** Phospho (ST), with neutral losses 0.0000(shown in table), 97.9769

**M4 :** Oxidation (M), with neutral losses 0.0000(shown in table), 63.9983

**S8 :** Phospho (ST), with neutral losses 0.0000(shown in table), 97.9769

**K12 :** Dimethyl (K)

**K16 :** Dimethyl:2H(4)13C(2) (K)

**Ions Score:** 29 **Expect:** 0.037

**Matched b ions:** b(3), b(4)-98, b(4), b(5)++, b(5)-196++, b(5), b(5)-98, b(6), b(6)++, b(7)++, b(8)-196++, b(8)-196, b(8)-294++, b(8)++, b(8)-98++, b(9)++, b(9)-196, b(9)-98++, b(9)-196++, b(9)-294++, b(10)++, b(10)-98++, b(11)++, b(11)-98++, b(11)-294++, b(12)++, b(12)-294++, b(12)-98++, b(13)-196++, b(14)++, b(14)-98++, b(15)-294++

**Matched y ions:** y(3), y(4), y(5)++, y(5), y(6)++, y(6), y(7), y(7)++, y(8)++, y(9), y(9)-98++, y(10)-98++, y(11)++, y(11)-98++, y(15)-196++

**Precursor origin neutral loss:**

## Peptide No.1008

**SSGMDKESVLDKSDLK**

**Confirmed sites:** @S:1,@S:2,@S:8

**Ambiguous sites:**

**MS/MS Fragmentation of SSGMDKESVLDKSDLK**

Found in **ZN148\_MOUSE**, Zinc finger protein 148 OS=Mus musculus GN=Znf148 PE=1 SV=2

Match to Query 5241: 2055.836396 from(514.966375,4+)

Title: Elution from: 33.065 to 33.065 scan no 2516 cid35.00 polarity:+:MA10

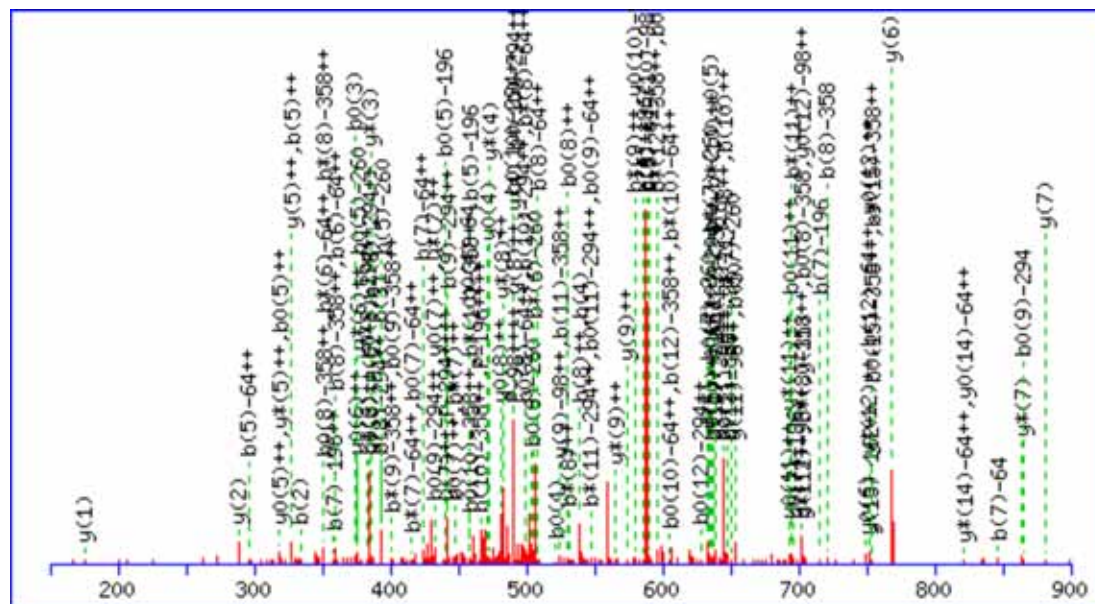

**Monoisotopic mass of neutral peptide Mr(calc):** 2055.8338

**Fixed modifications:** Carbamidomethyl (C) (apply to specified residues or termini only)

**Variable modifications:**

**S1 :** Phospho (ST), with neutral losses 97.9769(shown in table), 0.0000

**S2 :** Phospho (ST), with neutral losses 97.9769(shown in table), 0.0000

**M4 :** Oxidation (M), with neutral losses 0.0000(shown in table), 63.9983

**S8 :** Phospho (ST), with neutral losses 97.9769(shown in table), 0.0000

**K12 :** Dimethyl:2H(4)13C(2) (K)

**K16 :** Dimethyl (K)

**Ions Score:** 35 **Expect:** 0.011

**Matched b ions:** b(2), b(3), b(4)-98, b(4), b(5)++, b(5), b(5)-196, b(6)-196, b(6)-98, b(7)-196++, b(7)-196, b(8)-98++, b(8)-196++, b(8)-294++, b(8)++, b(9)-196++, b(9)++, b(9)-98++, b(9)-294++, b(10)++, b(10)-98++, b(10)-294++, b(10)-196++, b(11)++, b(11)-196++, b(11)-98++, b(12)-294++, b(12)-196++, b(14)-98++

**Matched y ions:** y(1), y(2), y(4), y(5)++, y(6)++, y(6), y(7), y(7)++, y(8)++, y(9)-98++, y(9)++, y(10)-98++, y(10)++, y(11)++, y(11)-98++

**Precursor origin neutral loss:** +

## Peptide No.1009

**SSGREEDDEELLR**

**Confirmed sites:** @S:1

**Ambiguous sites:**

MS/MS Fragmentation of **SSGREEDDEELLR**

Found in **ABLM1\_MOUSE**, Actin-binding LIM protein 1 OS=Mus musculus GN=Ablm1 PE=1 SV=1

Match to Query 3004: 1655.703942 from(552.908590,3+)

Title: Elution from: 35.106 to 35.106 scan no 2834 cid35.00 polarity:+:MA10

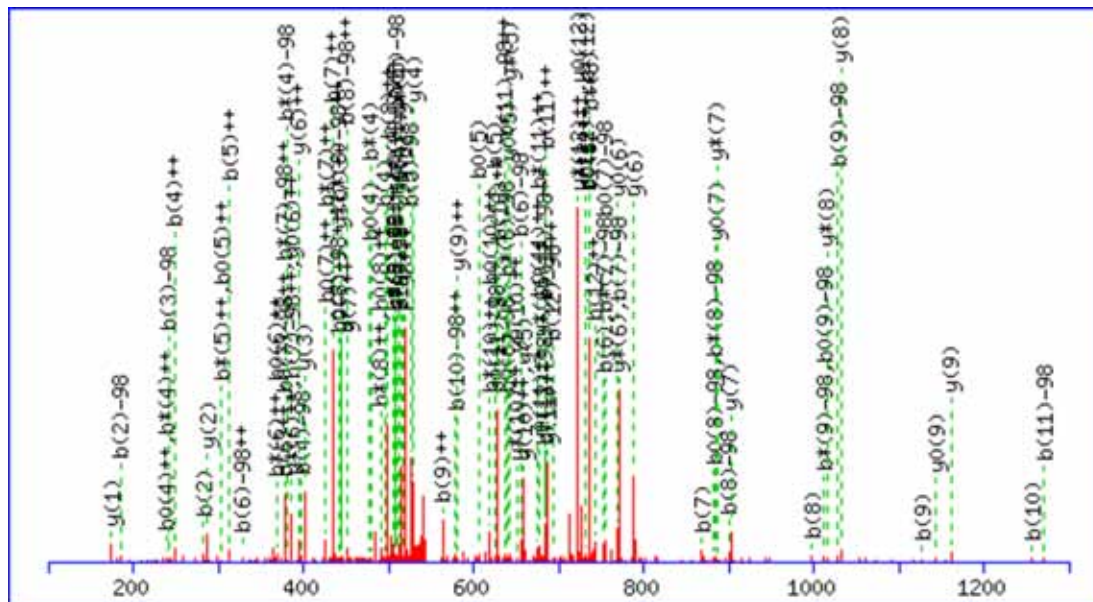

**Monoisotopic mass of neutral peptide Mr(calc):** 1655.7039

**Fixed modifications:** Carbamidomethyl (C) (apply to specified residues or termini only)

**Variable modifications:**

**N-term :** Dimethyl (N-term)

**S1 :** Phospho (ST), with neutral losses 97.9769(shown in table), 0.0000

**Ions Score:** 63 **Expect:** 1.6e-005

**Matched b ions:** b(2)-98, b(2), b(3)-98, b(4)++, b(4)-98, b(4), b(5)++, b(5)-98, b(5), b(6)++, b(6)-98, b(6), b(6)-98++, b(7)++, b(7)-98, b(7), b(7)-98++, b(8)++, b(8)-98, b(8), b(8)-98++, b(9)-98, b(9)-98++, b(9), b(9)++, b(10)++, b(10), b(10)-98++, b(11)-98, b(11)-98++, b(11)++, b(12)-98++, b(12)++

**Matched y ions:** y(1), y(2), y(3), y(4), y(5), y(6), y(6)++, y(7), y(7)++, y(8), y(8)++, y(9), y(9)++, y(10)++, y(11)++, y(12)++

**Precursor origin neutral loss:** +

## Peptide No.1010

**SSGREEDDEELLR**

**Confirmed sites:** @S:2

**Ambiguous sites:**

**MS/MS Fragmentation of** **SSGREEDDEELLR**

Found in **ABLM1\_MOUSE**, Actin-binding LIM protein 1 OS=Mus musculus GN=Ablm1 PE=1 SV=1

Match to Query 3463: 1655.703513 from(552.908447,3+)

Title: Elution from: 35.195 to 35.195 scan no 3016 cid35.00 polarity:+:MA10

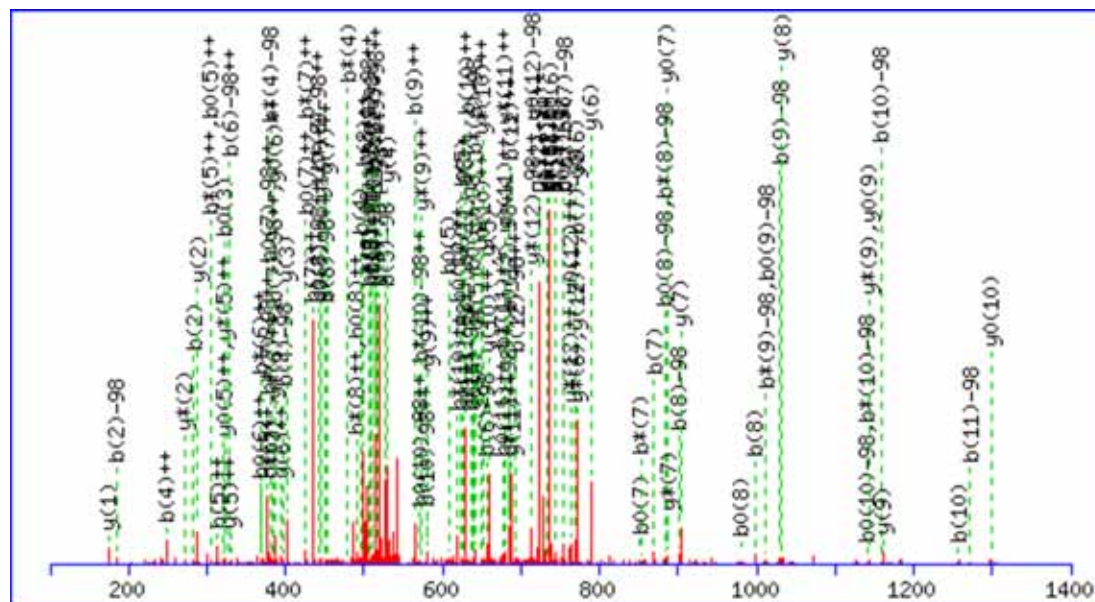

**Monoisotopic mass of neutral peptide Mr(calc): 1655.7039**

**Fixed modifications:** Carbamidomethyl (C) (apply to specified residues or termini only)

**Variable modifications:**

**N-term :** Dimethyl (N-term)

**S2 :** Phospho (ST), with neutral losses 97.9769(shown in table), 0.0000

**Ions Score:** 50 **Expect:** 0.00026

**Matched b ions:** b(2)-98, b(2), b(4)++, b(4)-98, b(4), b(5)++, b(5)-98, b(5), b(6)++, b(6)-98, b(6)-98++, b(6), b(7)++, b(7)-98, b(7), b(7)-98++, b(8), b(8)++, b(8)-98, b(8)-98++, b(9)-98++, b(9)-98, b(9)++, b(10)++, b(10), b(10)-98++, b(10)-98, b(11)-98, b(11)++, b(11)-98++, b(12)-98++, b(12)++

**Matched y ions:** y(1), y(2), y(3), y(4), y(5), y(5)++, y(6), y(6)++, y(7), y(7)++, y(8), y(8)++, y(9), y(9)++, y(10)++, y(11)++, y(12)-98++, y(12)++

**Precursor origin neutral loss:** +

## Peptide No.1011

**SSGREEDDEELLR**

**Confirmed sites:** @S:1

**Ambiguous sites:**

**MS/MS Fragmentation of SSGREEDDEELLR**

Found in **ABLM1\_MOUSE**, Actin-binding LIM protein 1 OS=Mus musculus GN=Ablim1 PE=1 SV=1

Match to Query 3025: 1661.735580 from(554.919136,3+)

Title: Elution from: 35.259 to 35.259 scan no 2856 cid35.00 polarity:+:MA10:m1s





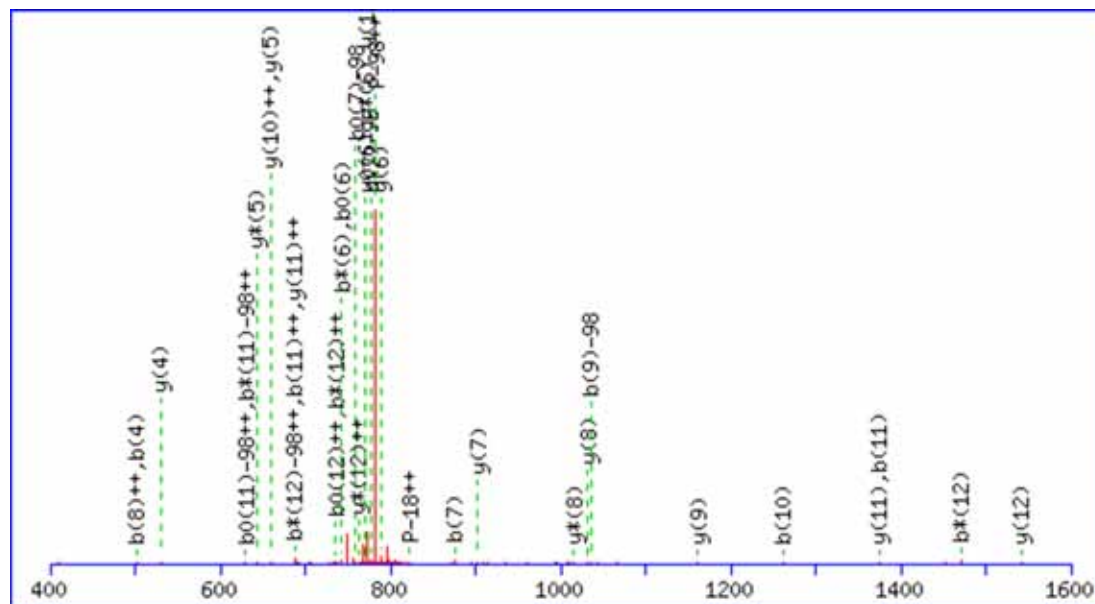

**Monoisotopic mass of neutral peptide Mr(calc):** 1661.7357

**Fixed modifications:** Carbamidomethyl (C) (apply to specified residues or termini only)

**Variable modifications:**

**N-term :** Dimethyl:2H(4)13C(2) (N-term)

**S2 :** Phospho (ST), with neutral losses 0.0000(shown in table), 97.9769

**Ions Score:** 31 **Expect:** 0.027

**Matched b ions:** b(4), b(7), b(7)-98, b(8)++, b(9)-98, b(10), b(11)++, b(11)

**Matched y ions:** y(4), y(5), y(6), y(7), y(8), y(9), y(10)++, y(11)++, y(11), y(12), y(12)++

**Precursor origin neutral loss:** +

## Peptide No.1013

**SSGSPYGGGYGSGGGSGGYGSR**

**Confirmed sites:** @S:4

**Ambiguous sites:**

**MS/MS Fragmentation of SSGSPYGGGYGSGGGSGGYGSR**

Found in **ROA3\_MOUSE**, Heterogeneous nuclear ribonucleoprotein A3 OS=Mus musculus GN=Hnrnpa3  
PE=1 SV=1

Match to Query 4509: 2017.781850 from(1009.898201,2+)

Title: Elution from: 30.956 to 30.956 scan no 2139 cid35.00 polarity:+:MA10:m1s



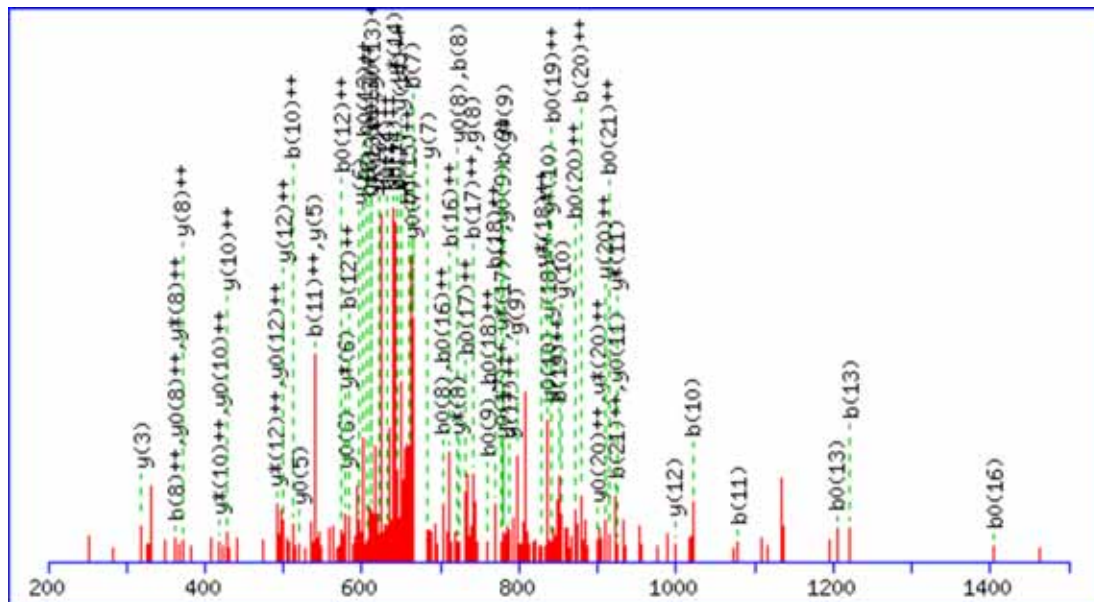

**Monoisotopic mass of neutral peptide Mr(calc):** 2017.7804

**Fixed modifications:** Carbamidomethyl (C) (apply to specified residues or termini only)

**Variable modifications:**

**N-term :** Dimethyl (N-term)

**Y10 :** Phospho (Y)

**Ions Score:** 33 **Expect:** 0.013

**Matched b ions:** b(6), b(7), b(8)++, b(8), b(9), b(10), b(10)++, b(11)++, b(11), b(12)++, b(13), b(13)++, b(14)++, b(16)++, b(17)++, b(18)++, b(19)++, b(20)++, b(21)++

**Matched y ions:** y(3), y(5), y(6), y(7), y(8)++, y(8), y(9), y(10)++, y(10), y(12)++, y(12), y(13)++, y(14)++, y(17)++, y(18)++, y(20)++

**Precursor origin neutral loss:** +

## Peptide No.1015

**SSGSPYGGGYGSGGGSGGYGSR**

**Confirmed sites:** @Y:6

**Ambiguous sites:**

MS/MS Fragmentation of **SSGSPYGGGYGSGGGSGGYGSR**

Found in **ROA3\_MOUSE**, Heterogeneous nuclear ribonucleoprotein A3 OS=Mus musculus GN=Hnrnpa3 PE=1 SV=1

Match to Query 4878: 2017.779886 from(1009.897219,2+)

Title: Elution from: 31.203 to 31.203 scan no 2267 cid35.00 polarity:+:MA10:m1s





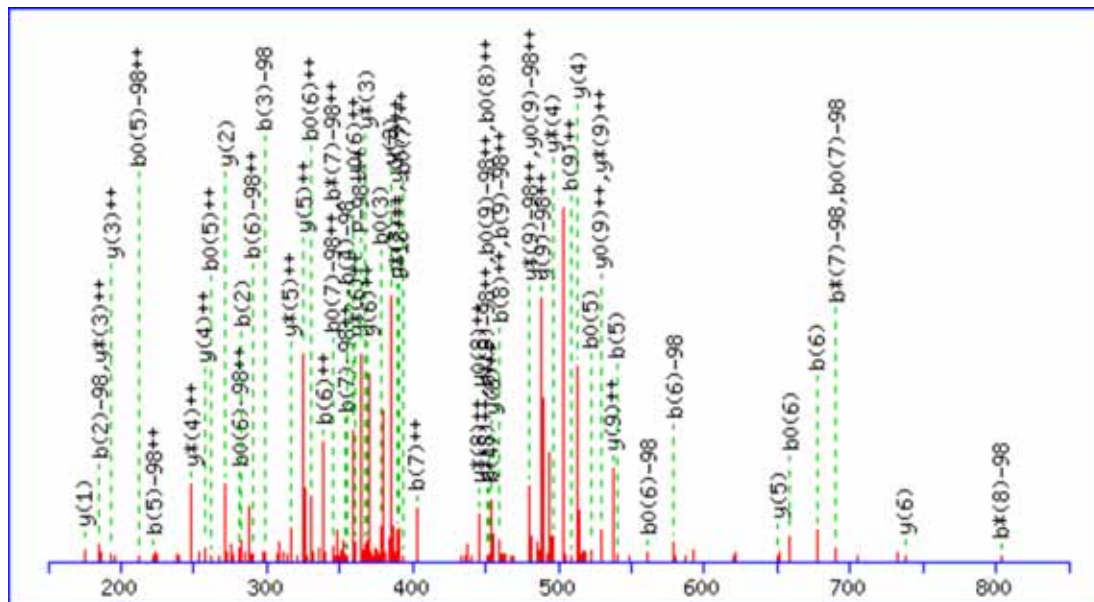

**Monoisotopic mass of neutral peptide Mr(calc): 1188.5652**

**Fixed modifications:** Carbamidomethyl (C) (apply to specified residues or termini only)

**Variable modifications:**

**N-term :** Dimethyl (N-term)

**S2 :** Phospho (ST), with neutral losses 97.9769(shown in table), 0.0000

**Ions Score:** 27 **Expect:** 0.051

**Matched b ions:** b(2)-98, b(2), b(3)-98, b(4)-98, b(4), b(5)-98++, b(5), b(6), b(6)-98, b(6)++, b(6)-98++, b(7)++, b(7)-98++, b(8)++, b(9)-98++, b(9)++

**Matched y ions:** y(1), y(2), y(3), y(3)++, y(4), y(4)++, y(5)++, y(5), y(6), y(6)++, y(8)++, y(9)-98++, y(9)++

**Precursor origin neutral loss:** +

## Peptide No.1017

**SSLGSHQLPR**

**Confirmed sites:** @S:5

**Ambiguous sites:**

**MS/MS Fragmentation of SSLGSHQLPR**

Found in **BAG3\_MOUSE**, BAG family molecular chaperone regulator 3 OS=Mus musculus GN=Bag3 PE=1 SV=1

Match to Query 937: 1188.565209 from(397.195679,3+)

Title: Elution from: 27.198 to 27.198 scan no 1776 cid35.00 polarity:+:MA10

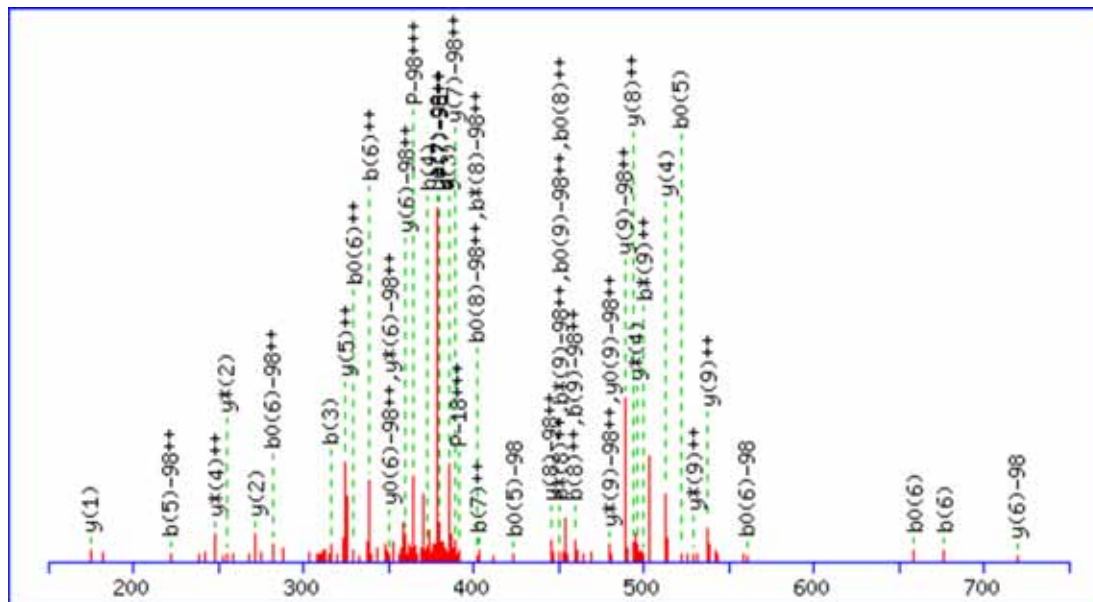

**Monoisotopic mass of neutral peptide Mr(calc):** 1188.5652

**Fixed modifications:** Carbamidomethyl (C) (apply to specified residues or termini only)

**Variable modifications:**

**N-term :** Dimethyl (N-term)

**S5 :** Phospho (ST), with neutral losses 97.9769(shown in table), 0.0000

**Ions Score:** 35 **Expect:** 0.0095

**Matched b ions:** b(3), b(4), b(5)-98++, b(6), b(6)++, b(7)++, b(8)++, b(9)-98++

**Matched y ions:** y(1), y(2), y(3), y(4), y(5)++, y(6)-98, y(6)-98++, y(7)-98++, y(8)++, y(8)-98++, y(9)-98++, y(9)++

**Precursor origin neutral loss:** +

## Peptide No.1018

**SSPDDGNDVSPYSLSPVSNKSQK**

**Confirmed sites:** @S:1,@S:2,@Y:12,@S:18,@S:21

**Ambiguous sites:**

**MS/MS Fragmentation of SSPDDGNDVSPYSLSPVSNKSQK**

Found in **FZR\_MOUSE**, Fizzy-related protein homolog OS=Mus musculus GN=Fzr1 PE=1 SV=1

Match to Query 8445: 2903.099187 from(968.707005,3+)

Title: Elution from: 45.205 to 45.205 scan no 4326 cid35.00 polarity:+:MA10:m1s





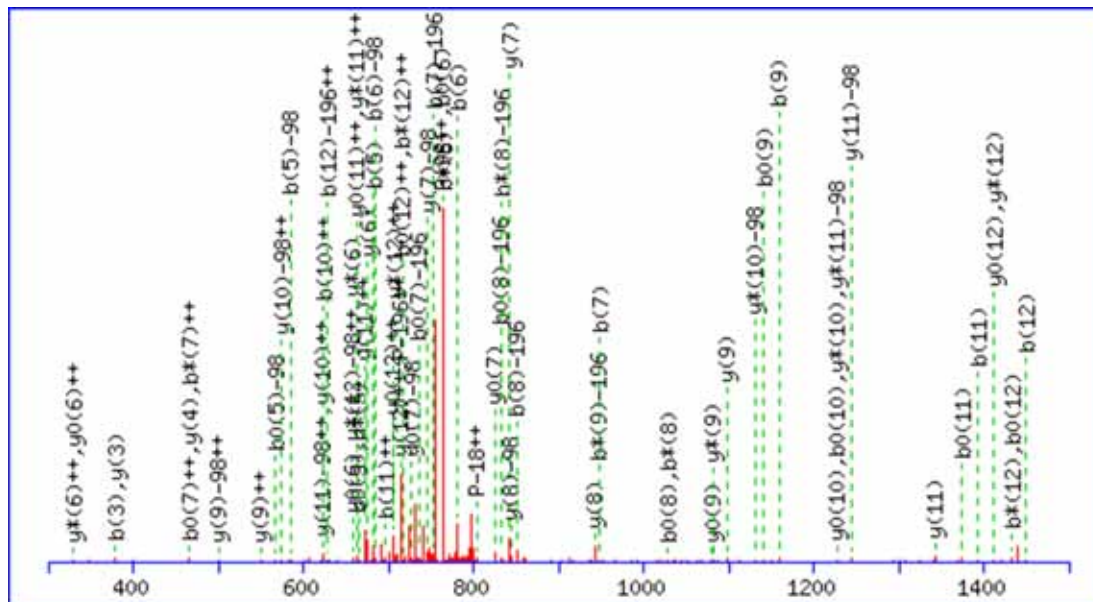

**Monoisotopic mass of neutral peptide Mr(calc):** 1623.7463

**Fixed modifications:** Carbamidomethyl (C) (apply to specified residues or termini only)

**Variable modifications:**

**N-term :** Dimethyl (N-term)

**S1 :** Phospho (ST), with neutral losses 0.0000(shown in table), 97.9769

**K5 :** Dimethyl (K)

**S7 :** Phospho (ST), with neutral losses 0.0000(shown in table), 97.9769

**Ions Score:** 46 **Expect:** 0.00094

**Matched b ions:** b(3), b(5)-98, b(5), b(6), b(6)-98, b(7)-98, b(7), b(7)-196, b(8)-98, b(8)-196, b(9), b(10)-98++, b(10)++, b(11), b(11)++, b(12), b(12)-98++, b(12)-196++

**Matched y ions:** y(3), y(4), y(6), y(7), y(7)-98, y(8), y(8)-98, y(9), y(9)-98++, y(9)++, y(10)++, y(10)-98++, y(11)-98++, y(11)-98, y(11), y(11)++, y(12)++

**Precursor origin neutral loss:** +

## Peptide No.1020

**SSPFKVSPLSFGR**

**Confirmed sites:** @S:2,@S:7

**Ambiguous sites:**

**MS/MS Fragmentation of** **SSPFKVSPLSFGR**

Found in **SDPR\_MOUSE**, Serum deprivation-response protein OS=Mus musculus GN=Sdpr PE=1 SV=3

Match to Query 2819: 1623.747496 from(812.881024,2+)

Title: Elution from: 56.702 to 56.702 scan no 5429 cid35.00 polarity:+:MA10:m1s

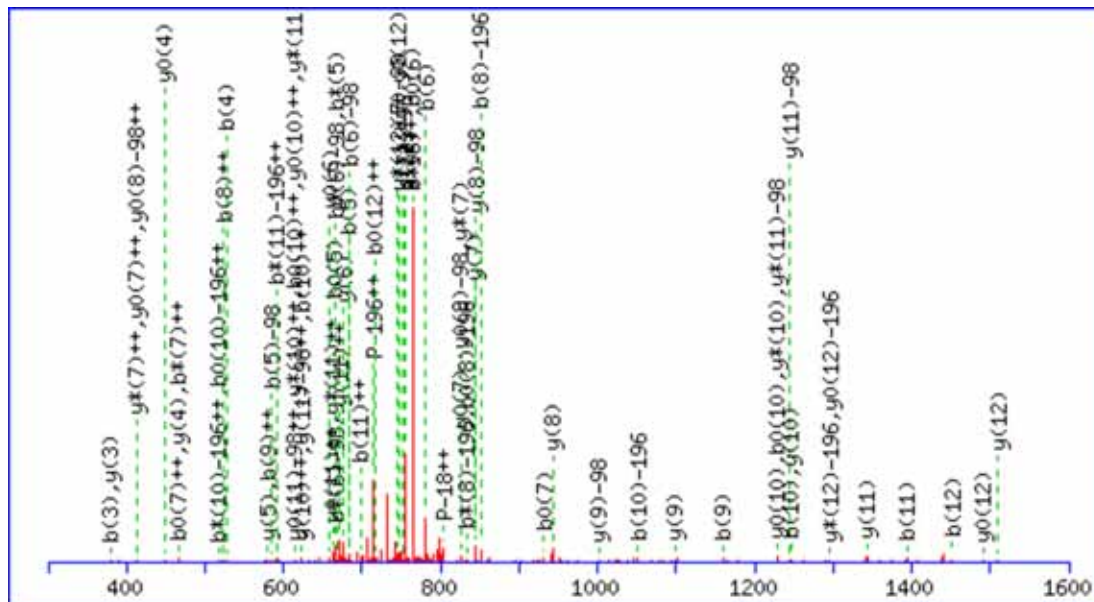

**Monoisotopic mass of neutral peptide Mr(calc):** 1623.7463

**Fixed modifications:** Carbamidomethyl (C) (apply to specified residues or termini only)

**Variable modifications:**

**N-term :** Dimethyl (N-term)

**S2 :** Phospho (ST), with neutral losses 0.0000(shown in table), 97.9769

**K5 :** Dimethyl (K)

**S7 :** Phospho (ST), with neutral losses 0.0000(shown in table), 97.9769

**Ions Score:** 49 **Expect:** 0.00058

**Matched b ions:** b(3), b(4), b(5)-98, b(5), b(6), b(6)-98, b(7)-98, b(7)-196, b(8)++, b(8)-196, b(9), b(9)++, b(10)-98++, b(10)-196, b(10), b(10)++, b(11), b(11)++, b(12)-98++, b(12)

**Matched y ions:** y(3), y(4), y(5), y(6), y(7), y(7)-98, y(8), y(8)-98, y(9)-98, y(9), y(10), y(10)++, y(11)++, y(11), y(11)-98, y(11)-98++, y(12), y(12)++, y(12)-98++

**Precursor origin neutral loss:** +

## Peptide No.1021

**SSPFKVSPLSFGR**

**Confirmed sites:** @S:2,@S:7

**Ambiguous sites:**

MS/MS Fragmentation of **SSPFKVSPLSFGR**

Found in **SDPR\_MOUSE**, Serum deprivation-response protein OS=Mus musculus GN=Sdpr PE=1 SV=3

Match to Query 2569: 1635.810736 from(818.912644,2+)

Title: Elution from: 56.760 to 56.760 scan no 5367 cid35.00 polarity:+:MA10

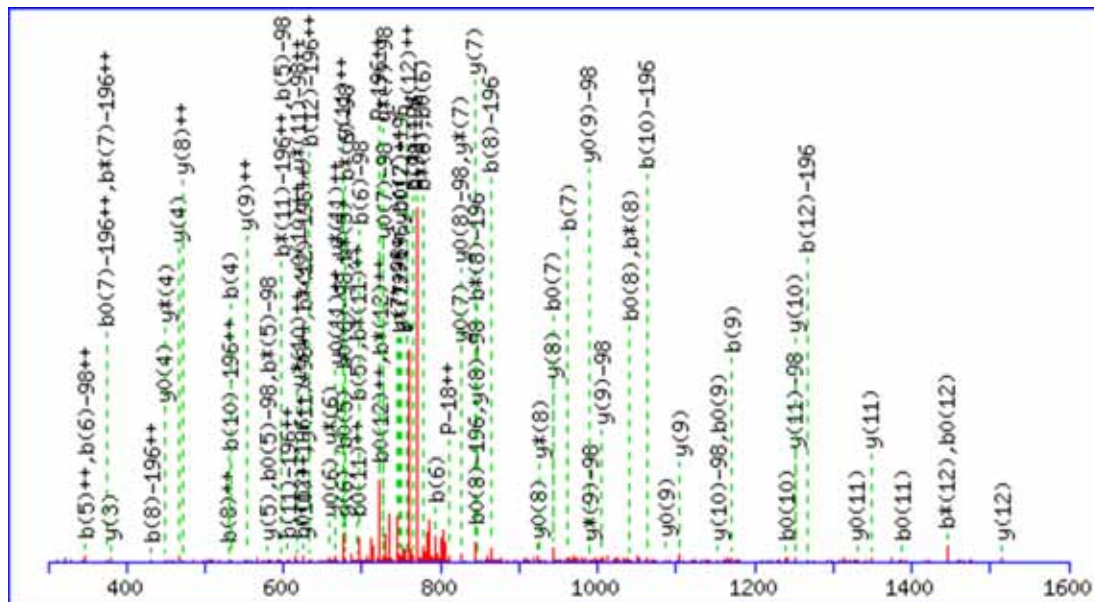

**Monoisotopic mass of neutral peptide Mr(calc):** 1635.8099

**Fixed modifications:** Carbamidomethyl (C) (apply to specified residues or termini only)

**Variable modifications:**

**N-term :** Dimethyl:2H(4)13C(2) (N-term)

**S2 :** Phospho (ST), with neutral losses 0.0000(shown in table), 97.9769

**K5 :** Dimethyl:2H(4)13C(2) (K)

**S7 :** Phospho (ST), with neutral losses 0.0000(shown in table), 97.9769

**Ions Score:** 39 **Expect:** 0.0062

**Matched b ions:** b(4), b(5)++, b(5), b(5)-98, b(6)-98++, b(6)-98, b(6), b(7)-98, b(7), b(7)-196, b(8)-196, b(8)-196++, b(8)++, b(8)-98, b(9), b(9)-98, b(10)-196, b(10)-98, b(10)-196++, b(11)-98, b(11)-196++, b(12)-196++, b(12)-196

**Matched y ions:** y(3), y(4), y(5), y(6), y(7), y(7)-98, y(8), y(8)-98, y(8)++, y(9), y(9)++, y(9)-98, y(10), y(10)-98, y(10)++, y(11)++, y(11), y(11)-98, y(11)-98++, y(12), y(12)-98, y(12)-98++, y(12)++

**Precursor origin neutral loss:** +

## Peptide No.1022

**SSPLSVVVR**

**Confirmed sites:** @S:5

**Ambiguous sites:**

MS/MS Fragmentation of **SSPLSVVVR**

Found in **SN\_MOUSE**, Sialoadhesin OS=Mus musculus GN=Siglec1 PE=1 SV=1

Match to Query 538: 1022.518302 from(512.266427,2+)

Title: Elution from: 22.615 to 22.615 scan no 1313 cid35.00 polarity:+:MA10

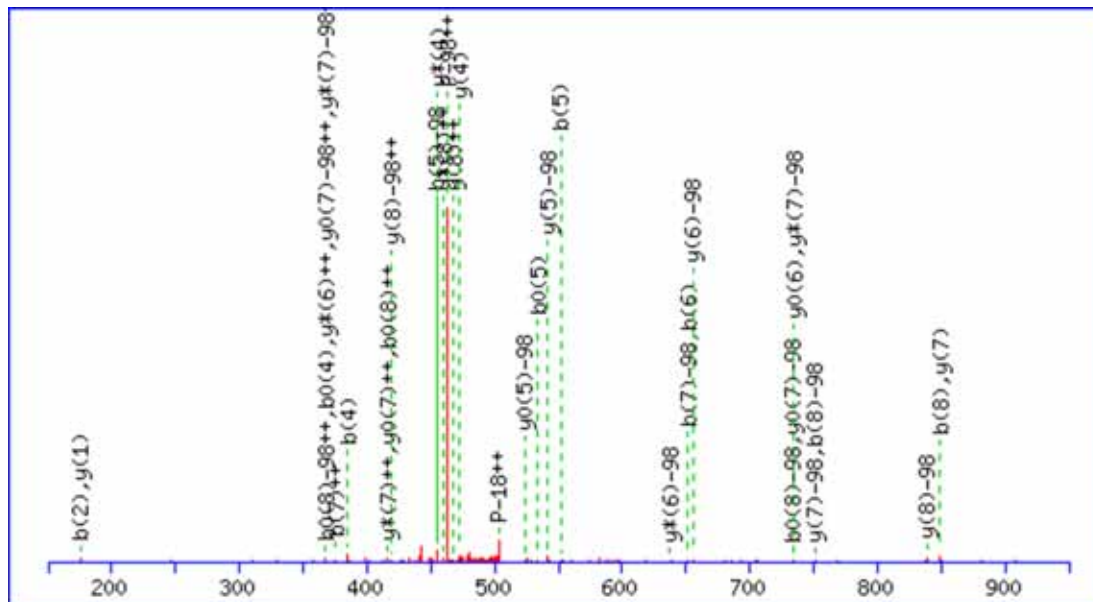

**Monoisotopic mass of neutral peptide Mr(calc):** 1022.5162

**Fixed modifications:** Carbamidomethyl (C) (apply to specified residues or termini only)

**Variable modifications:**

**S5 :** Phospho (ST), with neutral losses 97.9769(shown in table), 0.0000

**Ions Score:** 26 **Expect:** 0.054

**Matched b ions:** b(2), b(4), b(5)-98, b(5), b(6), b(7)-98, b(7)++, b(8), b(8)-98

**Matched y ions:** y(1), y(4), y(5)-98, y(6)-98, y(7), y(7)-98, y(8)-98, y(8)-98++, y(8)++

**Precursor origin neutral loss:** +

## Peptide No.1023

**SSPQLDPLRK**

**Confirmed sites:** @S:2

**Ambiguous sites:**

**MS/MS Fragmentation of SSPQLDPLRK**

Found in **LS14A\_MOUSE**, Protein LSM14 homolog A OS=Mus musculus GN=Lsm14a PE=1 SV=1

Match to Query 1530: 1275.658305 from(426.226711,3+)

Title: Elution from: 34.363 to 34.363 scan no 2901 cid35.00 polarity:+:MA10



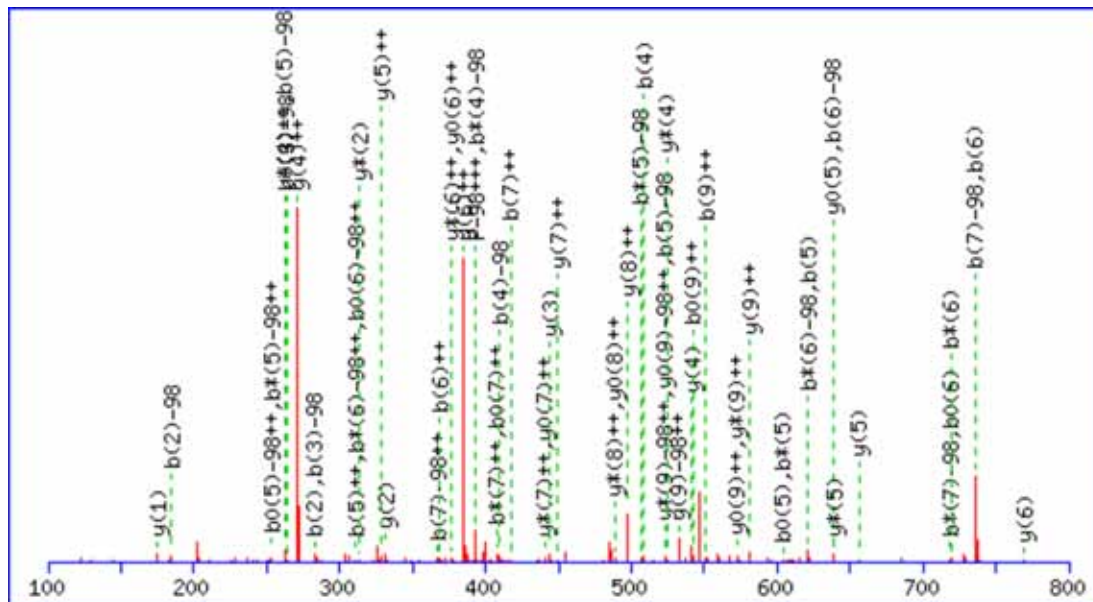

**Monoisotopic mass of neutral peptide Mr(calc):** 1275.6588

**Fixed modifications:** Carbamidomethyl (C) (apply to specified residues or termini only)

**Variable modifications:**

**N-term :** Dimethyl (N-term)

**S2 :** Phospho (ST), with neutral losses 97.9769(shown in table), 0.0000

**K10 :** Dimethyl (K)

**Ions Score:** 30 **Expect:** 0.028

**Matched b ions:** b(2)-98, b(2), b(3)-98, b(4), b(4)-98, b(5)-98++, b(5), b(5)-98, b(5)++, b(6)-98, b(6), b(6)++, b(7)-98, b(7)-98++, b(7)++, b(9)++

**Matched y ions:** y(1), y(2), y(3), y(4)++, y(4), y(5), y(5)++, y(6)++, y(6), y(7)++, y(8)++, y(9)-98++, y(9)++

**Precursor origin neutral loss:** +

## Peptide No.1024

**SSSLGDLLR**

**Confirmed sites:** @S:3

**Ambiguous sites:**

MS/MS Fragmentation of **SSSLGDLLR**

Found in **PKHO2\_MOUSE**, Pleckstrin homology domain-containing family O member 2 OS=Mus musculus GN=Plekho2 PE=1 SV=1

Match to Query 636: 1054.506484 from(528.260518,2+)

Title: Elution from: 50.769 to 50.769 scan no 5003 cid35.00 polarity:+MA10

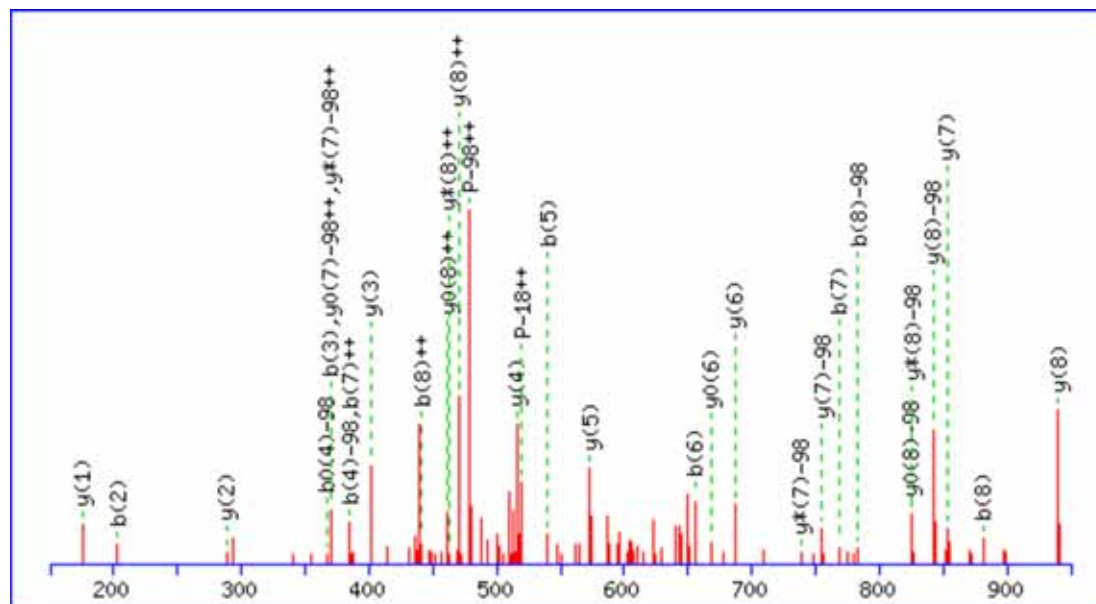

**Monoisotopic mass of neutral peptide Mr(calc):** 1054.5060

**Fixed modifications:** Carbamidomethyl (C) (apply to specified residues or termini only)

**Variable modifications:**

**N-term :** Dimethyl (N-term)

**S3 :** Phospho (ST), with neutral losses 97.9769(shown in table), 0.0000

**Ions Score:** 56 **Expect:** 8.3e-005

**Matched b ions:** b(2), b(3), b(4)-98, b(5), b(6), b(7), b(7)++, b(8), b(8)-98, b(8)++

**Matched y ions:** y(1), y(2), y(3), y(4), y(5), y(6), y(7)-98, y(7), y(8)++, y(8)-98, y(8)

**Precursor origin neutral loss:** +

## Peptide No.1025

**SSSPVTELTARSPVK**

**Confirmed sites:** @S:3,@S:12

**Ambiguous sites:**

MS/MS Fragmentation of **SSSPVTELTARSPVK**

Found in **SRRM2\_MOUSE**, Serine/arginine repetitive matrix protein 2 OS=Mus musculus GN=Srm2  
PE=1 SV=2

Match to Query 4153: 1773.832224 from(887.923388,2+)

Title: Elution from: 38.051 to 38.051 scan no 3406 cid35.00 polarity:+:MA10







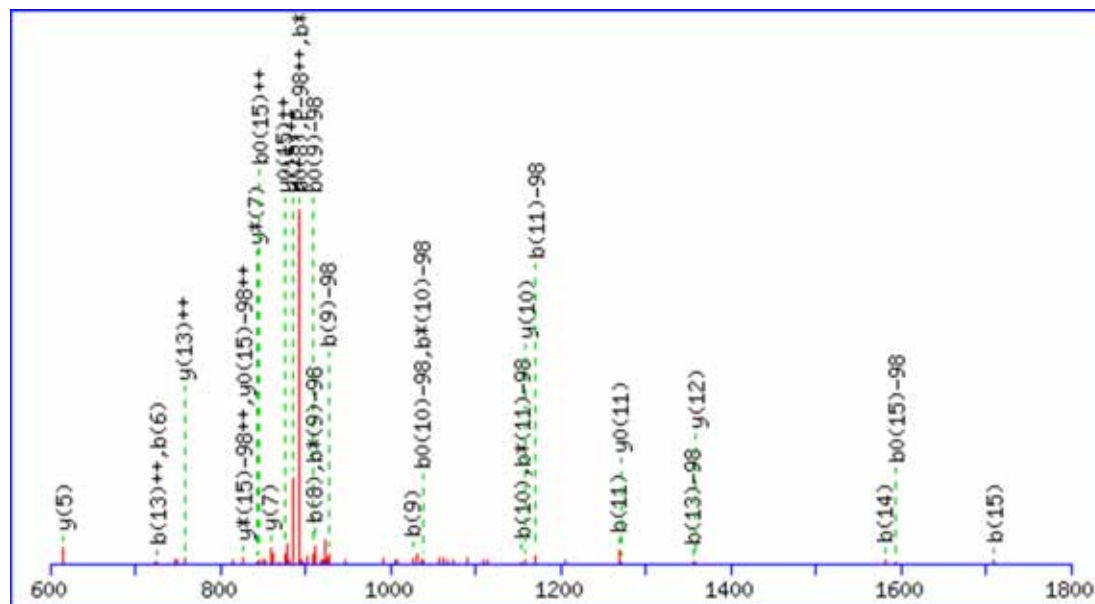

**Monoisotopic mass of neutral peptide Mr(calc):** 1883.8262

**Fixed modifications:** Carbamidomethyl (C) (apply to specified residues or termini only)

**Variable modifications:**

**N-term :** Dimethyl (N-term)

**S3 :** Phospho (ST), with neutral losses 0.0000(shown in table), 97.9769

**K16 :** Dimethyl (K)

**Ions Score:** 30 **Expect:** 0.042

**Matched b ions:** b(6), b(8), b(9)-98, b(9), b(10), b(11)-98, b(11), b(13)-98, b(13)++, b(14), b(15)

**Matched y ions:** y(5), y(7), y(10), y(12), y(13)++, y(15)++

**Precursor origin neutral loss:** +

## Peptide No.1028

**SSSRAEANDQDAIQEK**

**Confirmed sites:** @S:1

**Ambiguous sites:**

**MS/MS Fragmentation of** **SSSRAEANDQDAIQEK**

Found in **MYOTI\_MOUSE**, Myotilin OS=Mus musculus GN=Myot PE=2 SV=1

Match to Query 4195: 1895.892285 from(632.971371,3+)

Title: Elution from: 23.203 to 23.203 scan no 1276 cid35.00 polarity:+:MA10:m1s

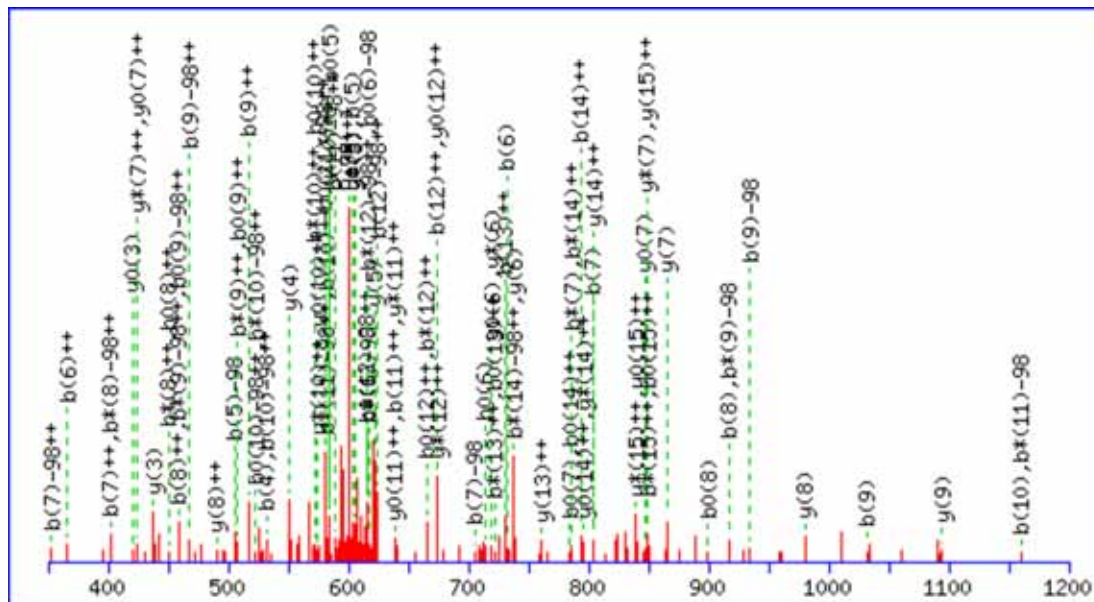

**Monoisotopic mass of neutral peptide Mr(calc):** 1895.8898

**Fixed modifications:** Carbamidomethyl (C) (apply to specified residues or termini only)

**Variable modifications:**

**N-term :** Dimethyl:2H(4)13C(2) (N-term)

**S1 :** Phospho (ST), with neutral losses 0.0000(shown in table), 97.9769

**K16 :** Dimethyl:2H(4)13C(2) (K)

**Ions Score:** 35 **Expect:** 0.018

**Matched b ions:** b(4), b(5)-98, b(5), b(6)++, b(6), b(7)++, b(7)-98++, b(7), b(7)-98, b(8), b(8)++, b(9)++, b(9)-98, b(9), b(9)-98++, b(10), b(10)++, b(10)-98++, b(11)-98++, b(11)++, b(12)++, b(12)-98++, b(13)++, b(14)++

**Matched y ions:** y(3), y(4), y(5), y(6), y(7), y(8), y(8)++, y(9), y(10)++, y(13)++, y(14)++, y(15)++

**Precursor origin neutral loss:** +

## Peptide No.1029

**SSSVGSSSSYPISSAGPR**

**Confirmed sites:** @S:2,@S:3,@S:6

**Ambiguous sites:**

MS/MS Fragmentation of **SSSVGSSSSYPISSAGPR**

Found in **PLEC\_MOUSE**, Plectin OS=Mus musculus GN=Plec PE=1 SV=2

Match to Query 4910: 1979.733692 from(990.874122,2+)

Title: Elution from: 44.617 to 44.617 scan no 4073 cid35.00 polarity:+:MA10:m1s



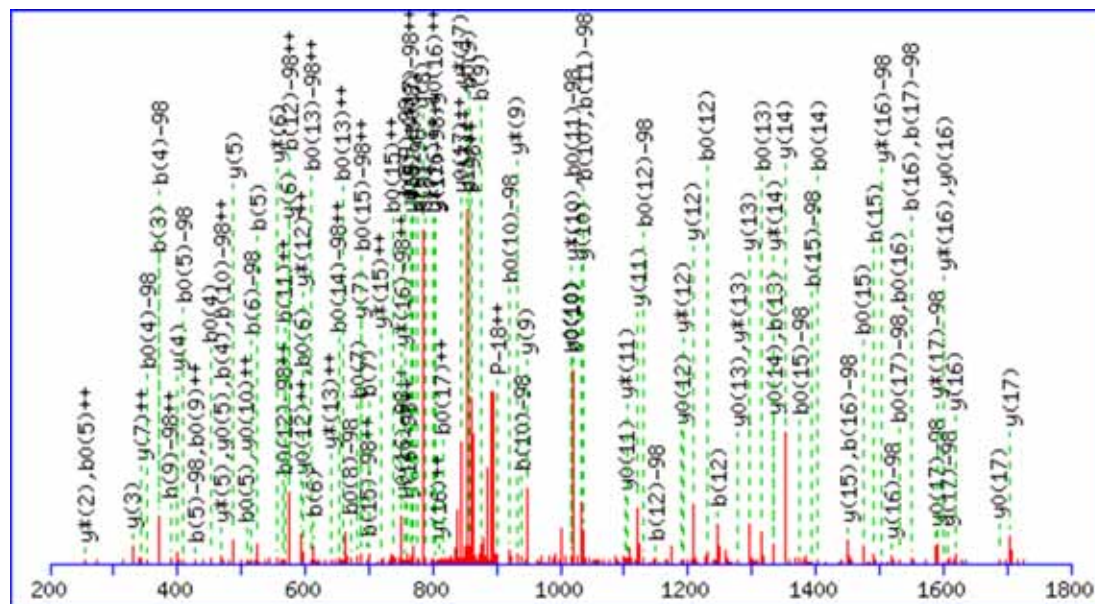

**Monoisotopic mass of neutral peptide Mr(calc):** 1819.7989

**Fixed modifications:** Carbamidomethyl (C) (apply to specified residues or termini only)

**Variable modifications:**

**N-term :** Dimethyl (N-term)

**S3 :** Phospho (ST), with neutral losses 0.0000(shown in table), 97.9769

**Ions Score:** 88 **Expect:** 8.1e-008

**Matched b ions:** b(3), b(4)-98, b(4), b(5), b(5)-98, b(6), b(6)-98, b(7), b(8), b(9)-98++, b(9), b(9)-98, b(10)-98++, b(10), b(10)-98, b(11)-98, b(11)++, b(12), b(12)-98++, b(12)-98, b(13), b(15), b(15)-98++, b(15)-98, b(16)-98, b(16), b(17)-98

**Matched y ions:** y(3), y(4), y(5), y(6), y(7)++, y(7), y(8), y(9), y(10), y(11), y(12), y(13), y(14), y(15), y(16)-98, y(16), y(16)-98++, y(16)++, y(17)++, y(17), y(17)-98, y(17)-98++

**Precursor origin neutral loss:** +

## Peptide No.1031

**SSSVGSSSSYPISSAGPR**

**Confirmed sites:** @S:3,@S:6

**Ambiguous sites:**

MS/MS Fragmentation of **SSSVGSSSSYPISSAGPR**

Found in **PLEC\_MOUSE**, Plectin OS=Mus musculus GN=Plec PE=1 SV=2

Match to Query 5941: 1899.766500 from(950.890526,2+)

Title: Elution from: 39.839 to 39.839 scan no 3616 cid35.00 polarity:+:MA10:m1s



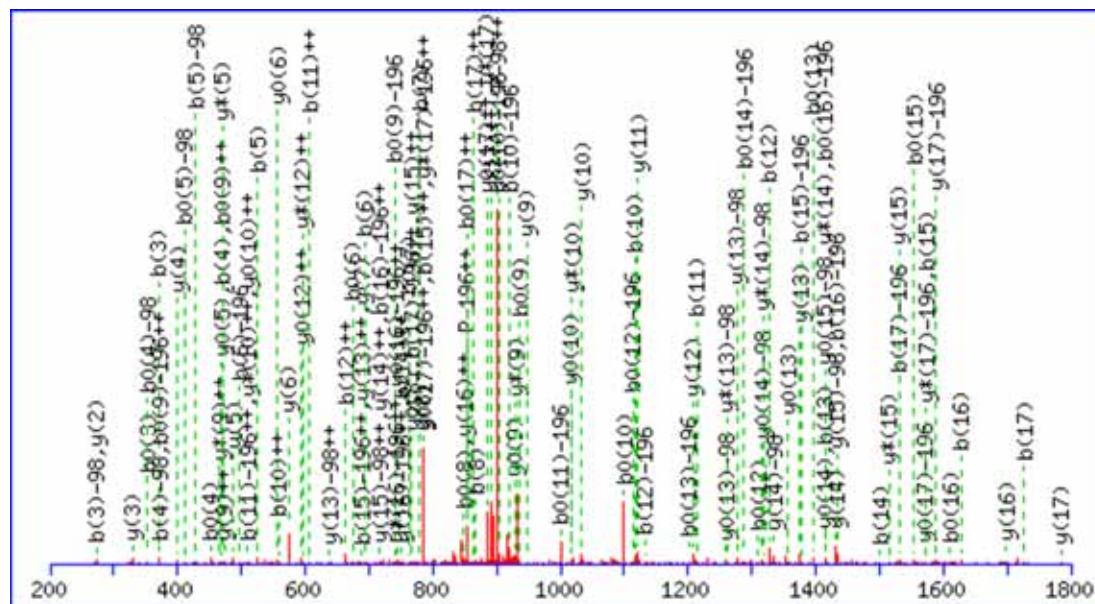

**Monoisotopic mass of neutral peptide Mr(calc):** 1899.7652

**Fixed modifications:** Carbamidomethyl (C) (apply to specified residues or termini only)

**Variable modifications:**

**N-term :** Dimethyl (N-term)

**S3 :** Phospho (ST), with neutral losses 0.0000(shown in table), 97.9769

**S6 :** Phospho (ST), with neutral losses 0.0000(shown in table), 97.9769

**Ions Score:** 98 **Expect:** 5.1e-009

**Matched b ions:** b(3)-98, b(3), b(4)-98, b(4), b(5), b(5)-98, b(6)-98, b(6)-196, b(6), b(7)-98, b(7), b(8)-98, b(8), b(9)-98++, b(9)-98, b(10)-98, b(10), b(10)++, b(10)-196, b(11)-98, b(11), b(11)-98++, b(11)-196++, b(11)++, b(12), b(12)++, b(12)-98, b(12)-196, b(13), b(13)-98, b(14), b(14)++, b(15)-98, b(15), b(15)-196, b(15)-196++, b(15)-98++, b(15)++, b(16)-196, b(16), b(16)-98, b(16)-98++, b(16)-196++, b(17)-196, b(17)-98, b(17)-196++, b(17)++, b(17)

**Matched y ions:** y(2), y(3), y(4), y(5), y(6), y(7), y(8), y(9)++, y(9), y(10), y(11), y(12), y(13), y(13)-98, y(13)-98++, y(13)++, y(14), y(14)-98, y(14)++, y(15)-98, y(15), y(15)++, y(15)-98++, y(16), y(16)++, y(16)-196++, y(16)-98++, y(16)-98, y(17)-196, y(17), y(17)++, y(17)-98, y(17)-98++

**Precursor origin neutral loss:** +

## Peptide No.1032

**SSSVGSSSSYPISSAGPR**

**Confirmed sites:** @S:3,@S:6,@Y:10

**Ambiguous sites:**

MS/MS Fragmentation of **SSSVGSSSSYPISSAGPR**

Found in **PLEC\_MOUSE**, Plectin OS=Mus musculus GN=Plec PE=1 SV=2

Match to Query 5110: 1979.732652 from(990.873602,2+)

Title: Elution from: 42.859 to 42.859 scan no 3890 cid35.00 polarity:+:MA10

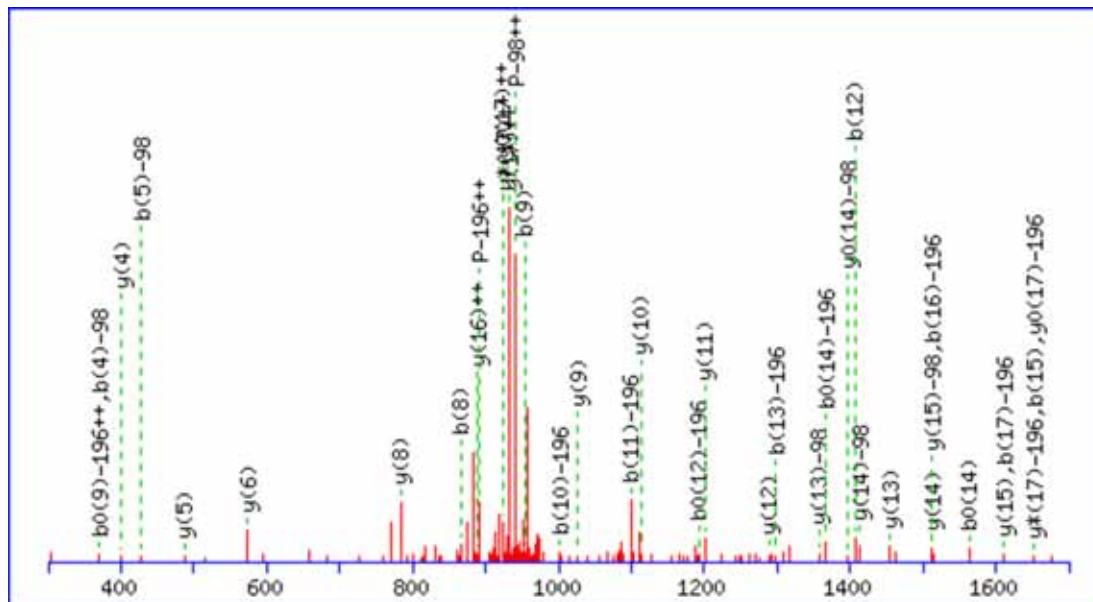

**Monoisotopic mass of neutral peptide Mr(calc):** 1979.7316

**Fixed modifications:** Carbamidomethyl (C) (apply to specified residues or termini only)

**Variable modifications:**

**N-term :** Dimethyl (N-term)

**S3 :** Phospho (ST), with neutral losses 97.9769(shown in table), 0.0000

**S6 :** Phospho (ST), with neutral losses 97.9769(shown in table), 0.0000

**Y10 :** Phospho (Y)

**Ions Score:** 37 **Expect:** 0.0031

**Matched b ions:** b(4)-98, b(5)-98, b(6)-98, b(7)-98, b(8)-98, b(8), b(9)-98++, b(9), b(10)-98, b(10)-196, b(11)-196, b(12), b(12)-98, b(13)-196, b(13)-98, b(15), b(16)-98, b(16)-196, b(17)-196

**Matched y ions:** y(4), y(5), y(6), y(8), y(9), y(10), y(11), y(12), y(13), y(13)-98, y(14)-98, y(14), y(15), y(15)-98, y(16)++, y(17)-98++, y(17)++

**Precursor origin neutral loss:** +

## Peptide No.1033

**SSSVGSSSSYPISSAGPR**

**Confirmed sites:** @S:7,@S:8

**Ambiguous sites:**

MS/MS Fragmentation of **SSSVGSSSSYPISSAGPR**

Found in **PLEC\_MOUSE**, Plectin OS=Mus musculus GN=Plec PE=1 SV=2

Match to Query 3899: 1899.767826 from(634.263218,3+)

Title: Elution from: 39.968 to 39.968 scan no 3355 cid35.00 polarity:+:MA10



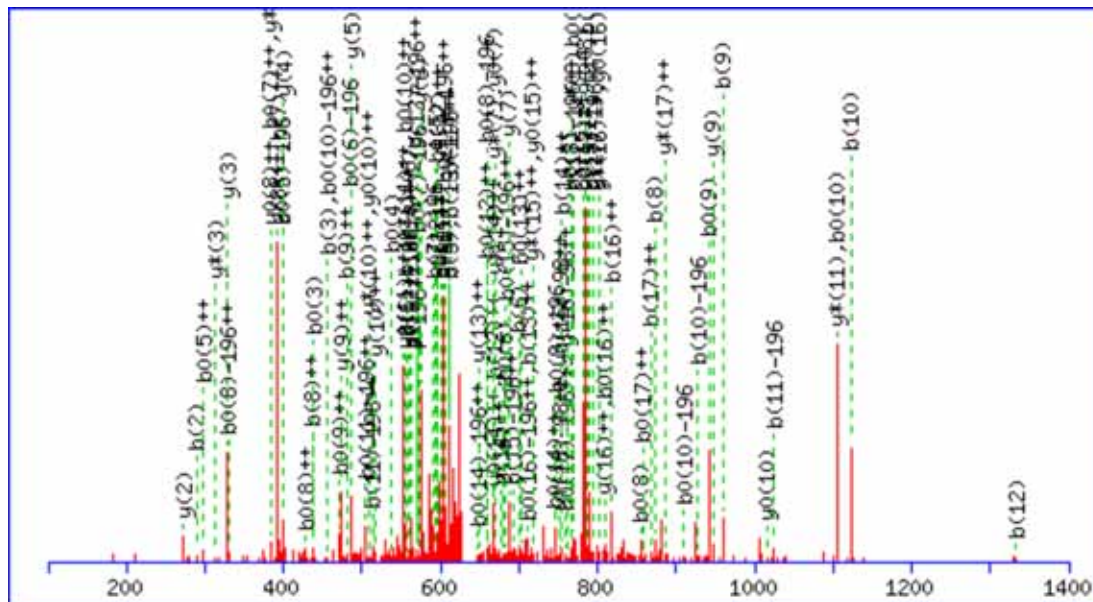

**Monoisotopic mass of neutral peptide Mr(calc):** 1905.7971

**Fixed modifications:** Carbamidomethyl (C) (apply to specified residues or termini only)

**Variable modifications:**

**N-term :** Dimethyl:2H(4)13C(2) (N-term)

**S2 :** Phospho (ST), with neutral losses 0.0000(shown in table), 97.9769

**S3 :** Phospho (ST), with neutral losses 0.0000(shown in table), 97.9769

**Ions Score:** 42 **Expect:** 0.0024

**Matched b ions:** b(2), b(3), b(4), b(5), b(6)-98, b(6), b(7)++, b(7)-98, b(7)-196, b(7), b(8), b(8)++, b(8)-98, b(9), b(9)++, b(10)-98, b(10), b(10)++, b(10)-196, b(10)-98++, b(11)-196, b(11)-98, b(11)++, b(11)-98++, b(11)-196++, b(12), b(12)++, b(12)-196++, b(12)-98++, b(13)-196++, b(13)++, b(13)-98++, b(14)-98++, b(14)++, b(15)++, b(15)-196++, b(15)-98++, b(16)++, b(16)-98++, b(17)-98++, b(17)-196++, b(17)++

**Matched y ions:** y(2), y(3), y(4), y(5), y(6), y(7), y(8)++, y(8), y(9)++, y(9), y(10)++, y(11)++, y(12)++, y(13)++, y(14)++, y(16)++, y(16)-98++, y(17)-196++, y(17)-98++

**Precursor origin neutral loss:** +

## Peptide No.1035

**SSSVGSSSSYPISSAGPR**

**Confirmed sites:** @S:2,@S:3,@S:6

**Ambiguous sites:**

MS/MS Fragmentation of **SSSVGSSSSYPISSAGPR**

Found in **PLEC\_MOUSE**, Plectin OS=Mus musculus GN=Plec PE=1 SV=2

Match to Query 4919: 1985.765628 from(993.890090,2+)

Title: Elution from: 44.658 to 44.658 scan no 4058 cid35.00 polarity:+:MA10:m1s



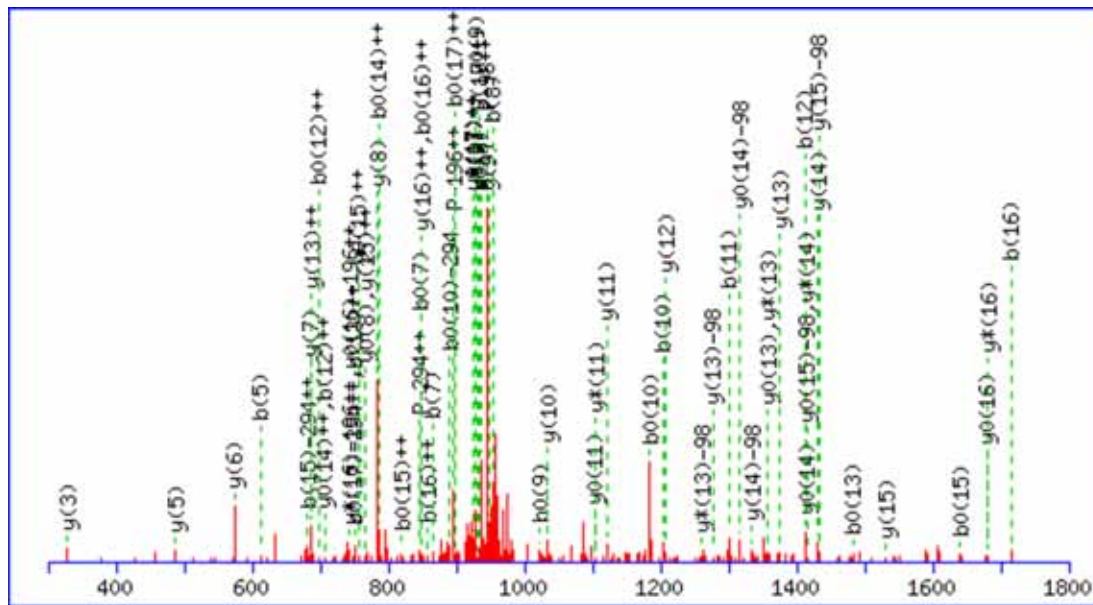

**Monoisotopic mass of neutral peptide Mr(calc):** 1985.7634

**Fixed modifications:** Carbamidomethyl (C) (apply to specified residues or termini only)

**Variable modifications:**

**N-term :** Dimethyl:2H(4)13C(2) (N-term)

**S2 :** Phospho (ST), with neutral losses 0.0000(shown in table), 97.9769

**S3 :** Phospho (ST), with neutral losses 0.0000(shown in table), 97.9769

**S6 :** Phospho (ST), with neutral losses 0.0000(shown in table), 97.9769

**Ions Score:** 37 **Expect:** 0.0047

**Matched b ions:** b(4)-98, b(5), b(5)-98, b(6)-98, b(7)-98, b(7), b(8)-196, b(8), b(9)-196, b(9)-98, b(10), b(10)-98, b(11), b(11)-196, b(12), b(12)-98, b(12)++, b(12)-196, b(13)++, b(13)-196, b(14)-196, b(15)-196, b(15)-294++, b(16), b(16)++, b(17)-98, b(17)-98++

**Matched y ions:** y(3), y(5), y(6), y(7), y(8), y(9), y(10), y(11), y(12), y(13), y(13)++, y(13)-98, y(14), y(14)-98, y(15)-98, y(15), y(15)++, y(16)++, y(17)-196++, y(17)-98++, y(17)++

**Precursor origin neutral loss:** +

## Peptide No.1036

**SSSVGSSSSYPISSAGPR**

**Confirmed sites: @S:3**

**Ambiguous sites:**

MS/MS Fragmentation of **SSSVGSSSSYPISSAGPR**

Found in **PLEC\_MOUSE**, Plectin OS=Mus musculus GN=Plec PE=1 SV=2

Match to Query 3953: 1825.831772 from(913.923162,2+)

Title: Elution from: 35.721 to 35.721 scan no 2921 cid35.00 polarity:+:MA10

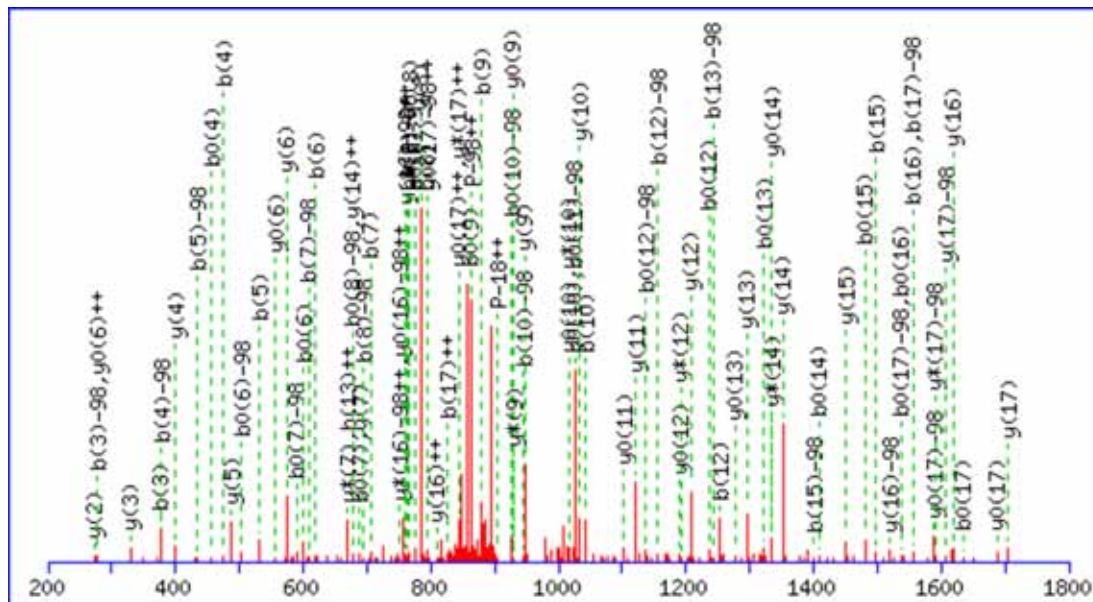

**Monoisotopic mass of neutral peptide Mr(calc):** 1825.8307

**Fixed modifications:** Carbamidomethyl (C) (apply to specified residues or termini only)

**Variable modifications:**

**N-term :** Dimethyl:2H(4)13C(2) (N-term)

**S3 :** Phospho (ST), with neutral losses 0.0000(shown in table), 97.9769

**Ions Score:** 131 **Expect:** 4.3e-012

**Matched b ions:** b(3)-98, b(3), b(4)-98, b(4), b(5), b(5)-98, b(6), b(7), b(7)-98, b(8)-98, b(8), b(9), b(10), b(10)-98, b(12), b(12)-98, b(13)++, b(13)-98, b(15), b(15)-98, b(16), b(17)-98, b(17)++

**Matched y ions:** y(2), y(3), y(4), y(5), y(6), y(7), y(8), y(9), y(10), y(11), y(12), y(13), y(14), y(14)++, y(15), y(16)-98, y(16), y(16)-98++, y(16)++, y(17), y(17)-98

**Precursor origin neutral loss:** +

## Peptide No.1037

**SSSVGSSSSYPISSAGPR**

**Confirmed sites:** @S:3,@S:6

**Ambiguous sites:**

MS/MS Fragmentation of **SSSVGSSSSYPISSAGPR**

Found in **PLEC\_MOUSE**, Plectin OS=Mus musculus GN=Plec PE=1 SV=2

Match to Query 4448: 1905.798608 from(953.906580,2+)

Title: Elution from: 39.893 to 39.893 scan no 3459 cid35.00 polarity:+:MA10



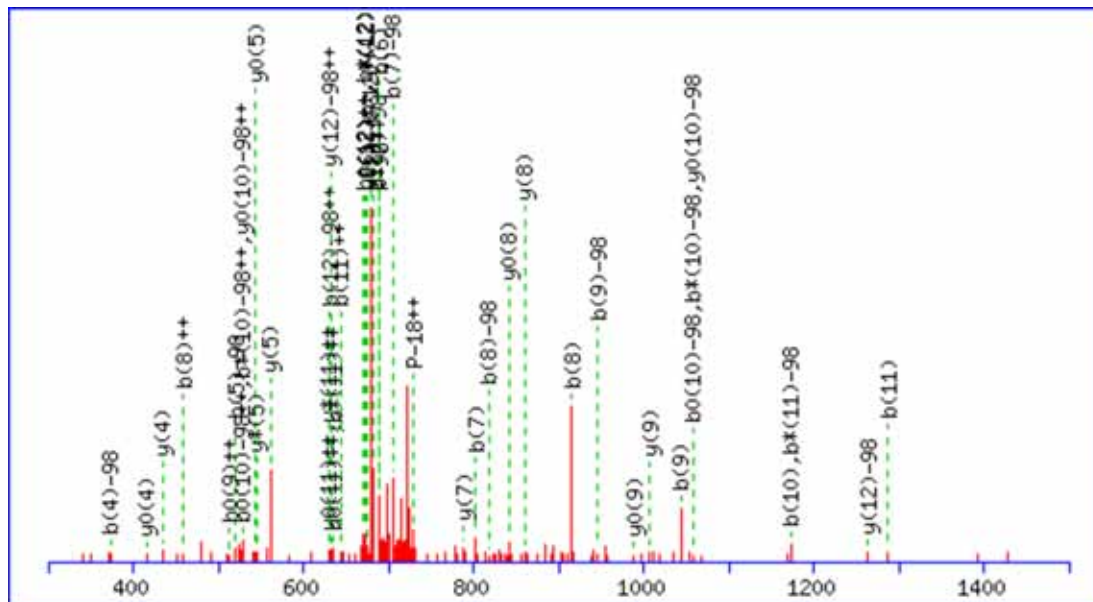

**Monoisotopic mass of neutral peptide Mr(calc):** 1476.6133

**Fixed modifications:** Carbamidomethyl (C) (apply to specified residues or termini only)

**Variable modifications:**

**N-term :** Dimethyl (N-term)

**S4 :** Phospho (ST), with neutral losses 0.0000(shown in table), 97.9769

**Ions Score:** 33 **Expect:** 0.014

**Matched b ions:** b(4)-98, b(5)-98, b(6), b(7), b(7)-98, b(8), b(8)++, b(8)-98, b(9), b(9)-98, b(10), b(11), b(11)++, b(12)++, b(12)-98++

**Matched y ions:** y(4), y(5), y(6), y(7), y(8), y(9), y(12)-98, y(12)++, y(12)-98++

**Precursor origin neutral loss:** +

## Peptide No.1039

### STLSMSPR

**Confirmed sites:** @S:6

**Ambiguous sites:**

### MS/MS Fragmentation of **STLSMSPR**

Found in **PPR1A\_MOUSE**, Protein phosphatase 1 regulatory subunit 1A OS=Mus musculus

GN=Ppp1r1a PE=2 SV=1

Match to Query 447: 1001.425324 from(501.719938,2+)

Title: Elution from: 20.916 to 20.916 scan no 1029 cid35.00 polarity:+:MA10



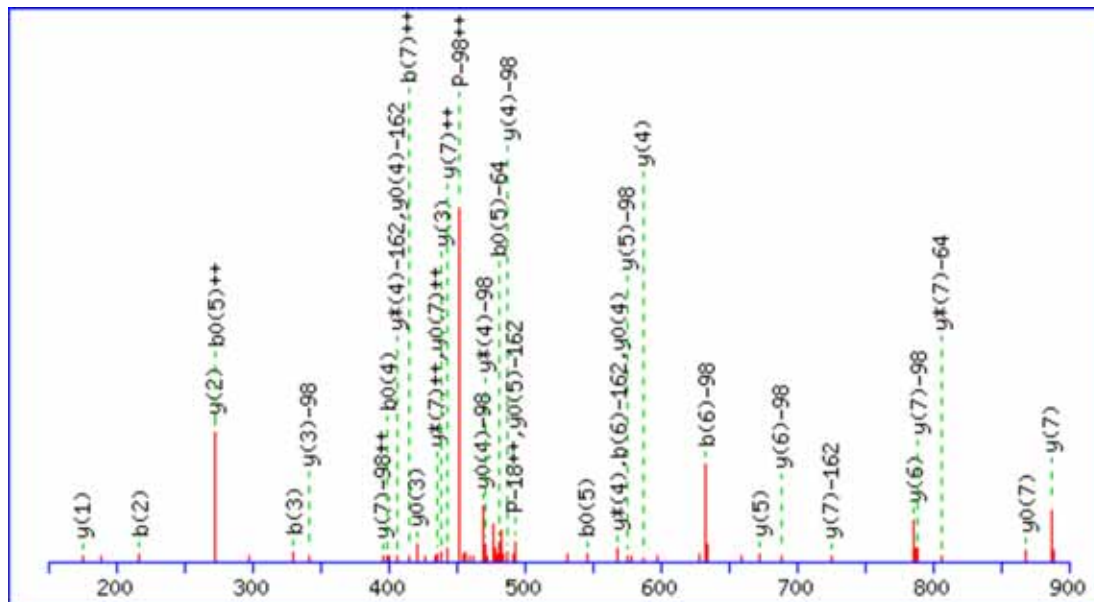

**Monoisotopic mass of neutral peptide Mr(calc):** 1001.4253

**Fixed modifications:** Carbamidomethyl (C) (apply to specified residues or termini only)

**Variable modifications:**

**N-term :** Dimethyl (N-term)

**M5 :** Oxidation (M), with neutral losses 0.0000(shown in table), 63.9983

**S6 :** Phospho (ST), with neutral losses 97.9769(shown in table), 0.0000

**Ions Score:** 34 **Expect:** 0.0049

**Matched b ions:** b(2), b(3), b(6)-98, b(7)++

**Matched y ions:** y(1), y(2), y(3)-98, y(3), y(4), y(4)-98, y(5), y(5)-98, y(6)-98, y(6), y(7), y(7)-98, y(7)++, y(7)-98++

**Precursor origin neutral loss:** +

## Peptide No.1040

**STSAPQMSPGSSDNQSSSPQPAQQK**

**Confirmed sites:** @S:11

**Ambiguous sites:**

MS/MS Fragmentation of **STSAPQMSPGSSDNQSSSPQPAQQK**

Found in **UBP2L\_MOUSE**, Ubiquitin-associated protein 2-like OS=Mus musculus GN=Ubp2l PE=1 SV=1

Match to Query 8112: 2683.147017 from(895.389615,3+)

Title: Elution from: 22.750 to 22.750 scan no 1331 cid35.00 polarity:+MA10:m1s

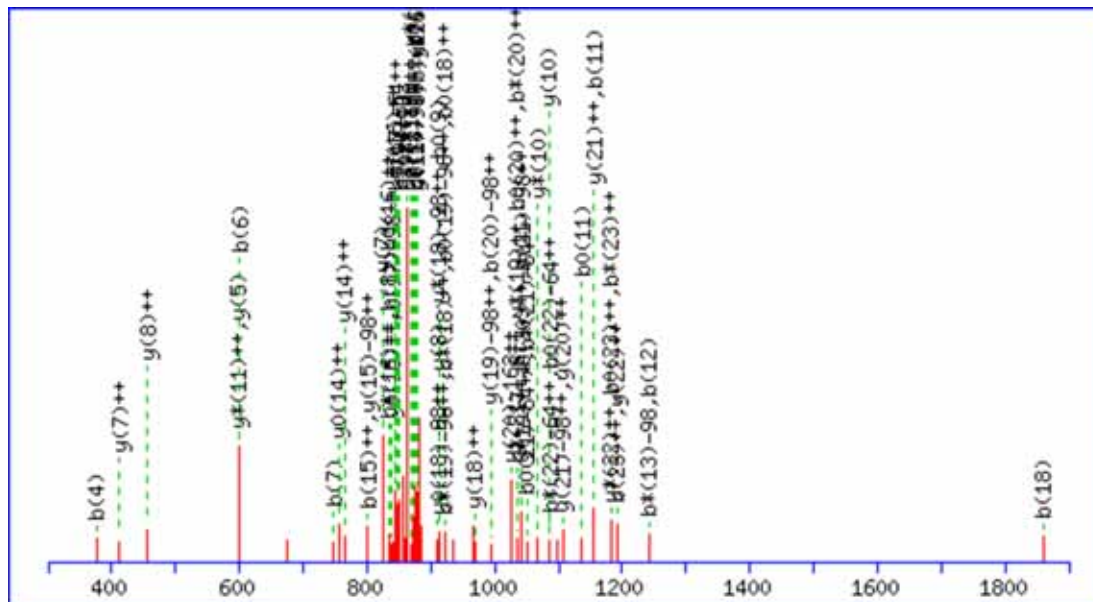

**Monoisotopic mass of neutral peptide Mr(calc):** 2683.1433

**Fixed modifications:** Carbamidomethyl (C) (apply to specified residues or termini only)

**Variable modifications:**

**N-term :** Dimethyl (N-term)

**M7 :** Oxidation (M), with neutral losses 0.0000(shown in table), 63.9983

**S11 :** Phospho (ST), with neutral losses 0.0000(shown in table), 97.9769

**K25 :** Dimethyl (K)

**Ions Score:** 52 **Expect:** 0.00049

**Matched b ions:** b(4), b(6), b(7), b(8), b(11), b(12), b(15)++, b(16)++, b(17)-98++, b(18), b(20)++, b(20)-98++, b(21)-98++, b(23)++

**Matched y ions:** y(5), y(7), y(7)++, y(8)++, y(8), y(10), y(14)++, y(15)-98++, y(16)++, y(17)-98++, y(18)++, y(19)++, y(19)-98++, y(20)++, y(21)++, y(21)-98++, y(22)++

**Precursor origin neutral loss:** +

## Peptide No.1041

**STSAPQMSPGSSDNQSSSPQPAQQK**

**Confirmed sites:** @S:18

**Ambiguous sites:**

**MS/MS Fragmentation of STSAPQMSPGSSDNQSSSPQPAQQK**

Found in **UBP2L\_MOUSE**, Ubiquitin-associated protein 2-like OS=Mus musculus GN=Ubp2l PE=1 SV=1

Match to Query 7024: 2683.141671 from(895.387833,3+)

Title: Elution from: 22.124 to 22.124 scan no 1136 cid35.00 polarity:+:MA10:m1s

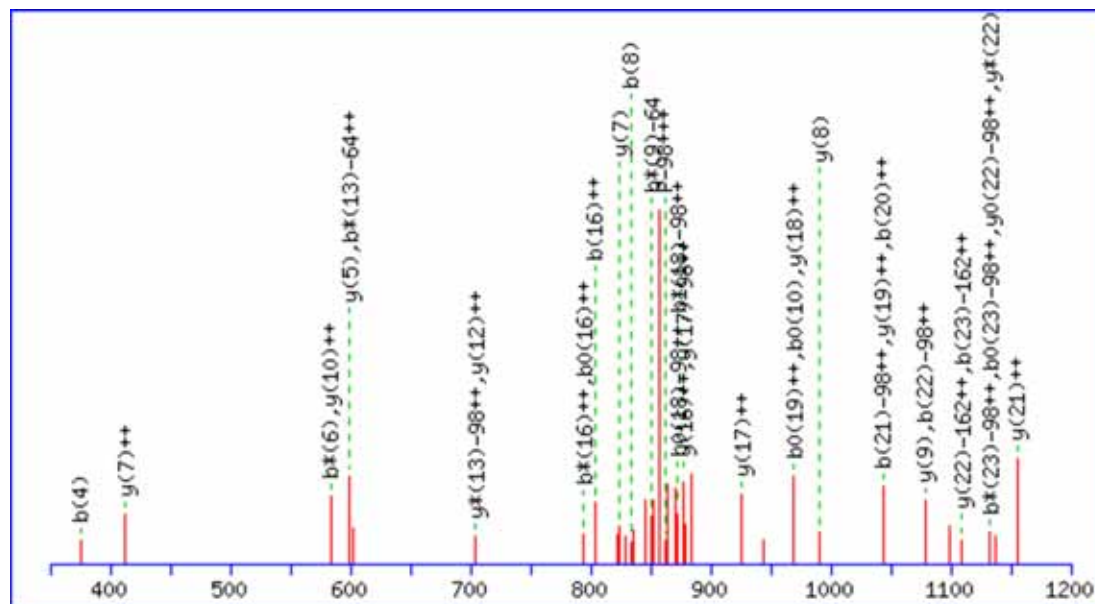

**Monoisotopic mass of neutral peptide Mr(calc):** 2683.1433

**Fixed modifications:** Carbamidomethyl (C) (apply to specified residues or termini only)

**Variable modifications:**

**N-term :** Dimethyl (N-term)

**M7 :** Oxidation (M), with neutral losses 0.0000(shown in table), 63.9983

**S18 :** Phospho (ST), with neutral losses 0.0000(shown in table), 97.9769

**K25 :** Dimethyl (K)

**Ions Score:** 41 **Expect:** 0.0053

**Matched b ions:** b(4), b(8), b(16)++, b(20)++, b(21)-98++, b(22)-98++

**Matched y ions:** y(5), y(7)++, y(7), y(8), y(9), y(10)++, y(12)++, y(16)++, y(17)-98++, y(17)++, y(18)++, y(19)++, y(21)++

**Precursor origin neutral loss:**

## Peptide No.1042

**STSPAPADVAPAQEDLR**

**Confirmed sites:** @S:3

**Ambiguous sites:**

**MS/MS Fragmentation of STSPAPADVAPAQEDLR**

Found in **G3BP1\_MOUSE**, Ras GTPase-activating protein-binding protein 1 OS=Mus musculus  
GN=G3bp1 PE=1 SV=1

**Match to Query 3982:** 1831.835836 from(916.925194,2+)

**Title:** Elution from: 37.171 to 37.171 scan no 3121 cid35.00 polarity:+:MA10

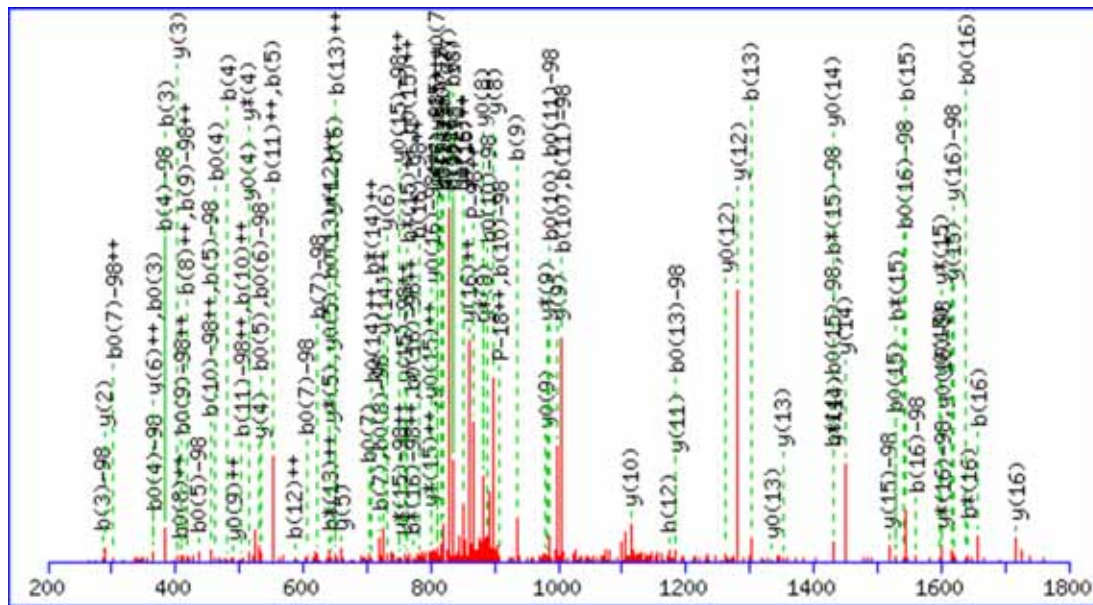

**Monoisotopic mass of neutral peptide Mr(calc):** 1831.8353

**Fixed modifications:** Carbamidomethyl (C) (apply to specified residues or termini only)

**Variable modifications:**

**N-term :** Dimethyl (N-term)

**S3 :** Phospho (ST), with neutral losses 0.0000(shown in table), 97.9769

**Ions Score:** 95 **Expect:** 1.6e-008

**Matched b ions:** b(3), b(3)-98, b(4)-98, b(4), b(5), b(5)-98, b(6), b(7), b(7)-98, b(8), b(8)++, b(9), b(9)-98, b(9)++, b(9)-98, b(10), b(10)-98, b(10)++, b(10)-98, b(11)++, b(11)-98, b(11)-98, b(11)-98, b(12)++, b(13), b(13)++, b(14), b(15), b(16), b(16)-98, b(16)-98, b(16)-98, b(16)++

**Matched y ions:** y(2), y(3), y(4), y(5), y(6)++, y(6), y(7), y(8), y(9), y(10), y(11), y(12), y(12)++, y(13), y(14)++, y(14), y(15)-98, y(15), y(15)-98, y(15)++, y(16), y(16)++, y(16)-98, y(16)-98

**Precursor origin neutral loss:** +

## Peptide No.1043

**STSPAPADVAPAQEDLR**

**Confirmed sites:** @S:3

**Ambiguous sites:**

**MS/MS Fragmentation of STSPAPADVAPAQEDLR**

Found in **G3BP1\_MOUSE**, Ras GTPase-activating protein-binding protein 1 OS=Mus musculus  
GN=G3bp1 PE=1 SV=1

Match to Query 4004: 1837.867476 from(919.941014,2+)

Title: Elution from: 37.164 to 37.164 scan no 3120 cid35.00 polarity:+:MA10





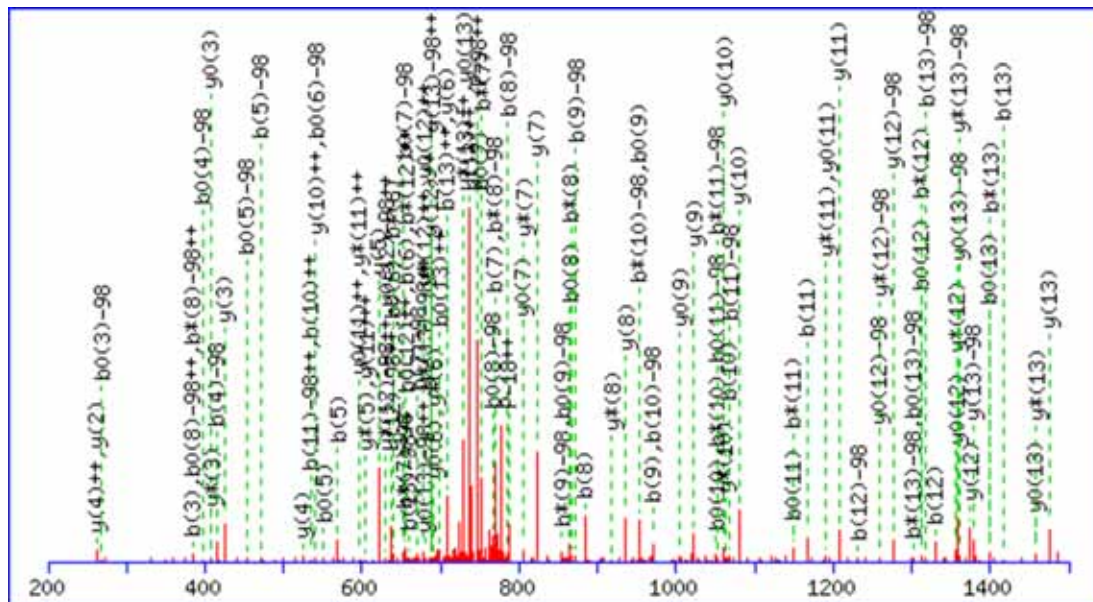

**Monoisotopic mass of neutral peptide Mr(calc):** 1589.7086

**Fixed modifications:** Carbamidomethyl (C) (apply to specified residues or termini only)

**Variable modifications:**

**N-term :** Dimethyl (N-term)

**S3 :** Phospho (ST), with neutral losses 97.9769(shown in table), 0.0000

**Ions Score:** 96 **Expect:** 9.1e-009

**Matched b ions:** b(3), b(4)-98, b(5), b(5)-98, b(6), b(7), b(7)-98, b(8), b(8)-98, b(9), b(9)-98, b(10)-98, b(10)++, b(10), b(11), b(11)-98, b(11)-98++, b(12), b(12)-98, b(13)++, b(13)-98, b(13)-98++, b(13)

**Matched y ions:** y(2), y(3), y(4)++, y(4), y(5), y(6), y(7), y(8), y(9), y(10), y(10)++, y(11), y(11)++, y(12), y(12)-98++, y(12)-98, y(12)++, y(13)++, y(13), y(13)-98, y(13)-98++

**Precursor origin neutral loss:** +

## Peptide No.1045

**STSQGSINSPVYSR**

**Confirmed sites:** @S:3,@S:6

**Ambiguous sites:**

MS/MS Fragmentation of **STSQGSINSPVYSR**

Found in **ABLM1\_MOUSE**, Actin-binding LIM protein 1 OS=Mus musculus GN=Ablm1 PE=1 SV=1

Match to Query 3069: 1669.676270 from(835.845411,2+)

Title: Elution from: 35.458 to 35.458 scan no 2885 cid35.00 polarity:+:MA10

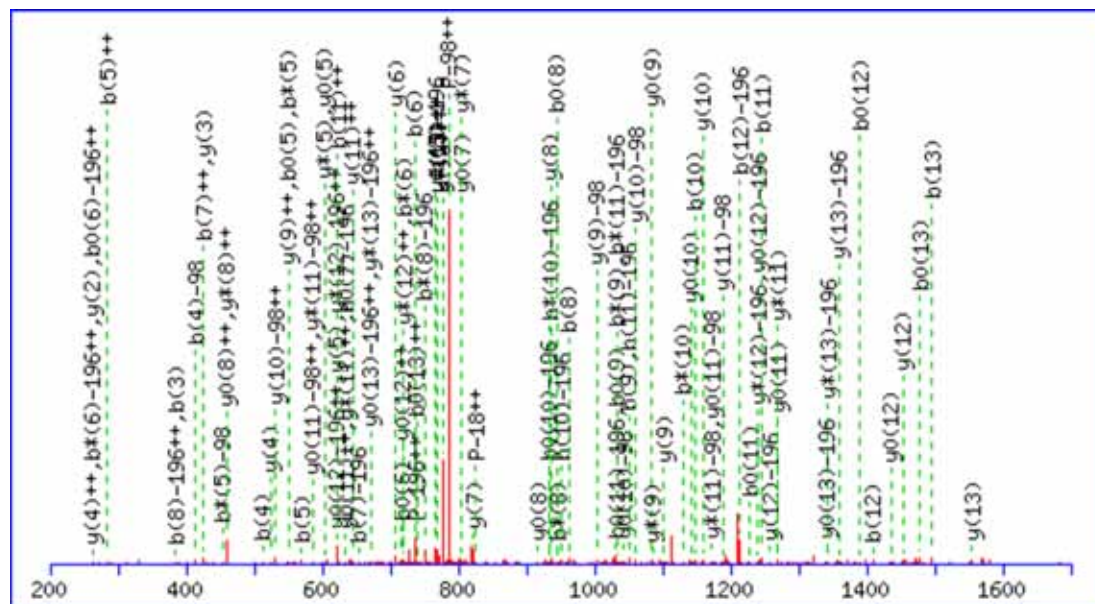

**Monoisotopic mass of neutral peptide Mr(calc):** 1669.6750

**Fixed modifications:** Carbamidomethyl (C) (apply to specified residues or termini only)

**Variable modifications:**

**N-term :** Dimethyl (N-term)

**S3 :** Phospho (ST), with neutral losses 0.0000(shown in table), 97.9769

**S6 :** Phospho (ST), with neutral losses 0.0000(shown in table), 97.9769

**Ions Score:** 34 **Expect:** 0.011

**Matched b ions:** b(3), b(4)-98, b(4), b(5), b(5)++, b(6)-98, b(6), b(7)++, b(7)-98, b(7)-196, b(8)-98, b(8), b(8)-196++, b(8)-196, b(9)-98, b(9), b(10)-196, b(10)-98, b(10), b(11)-196, b(11), b(11)-98, b(11)++, b(12), b(12)-98, b(12)-196, b(13), b(13)-98++

**Matched y ions:** y(2), y(3), y(4), y(4)++, y(5), y(6), y(7), y(8), y(9)-98, y(9)++, y(9), y(10)-98++, y(10), y(10)-98, y(11)++, y(11)-98, y(12), y(12)-98, y(12)-196, y(12)-98++, y(13)-98++, y(13)++, y(13), y(13)-98, y(13)-196

**Precursor origin neutral loss:** +

## Peptide No.1046

**STSQGSINSPVYSR**

**Confirmed sites: @S:3**

**Ambiguous sites:**

MS/MS Fragmentation of **STSQGSINSPVYSR**

Found in **ABLM1\_MOUSE**, Actin-binding LIM protein 1 OS=Mus musculus GN=Ablm1 PE=1 SV=1

Match to Query 2383: 1595.740580 from(798.877566,2+)

Title: Elution from: 32.519 to 32.519 scan no 2446 cid35.00 polarity:+:MA10

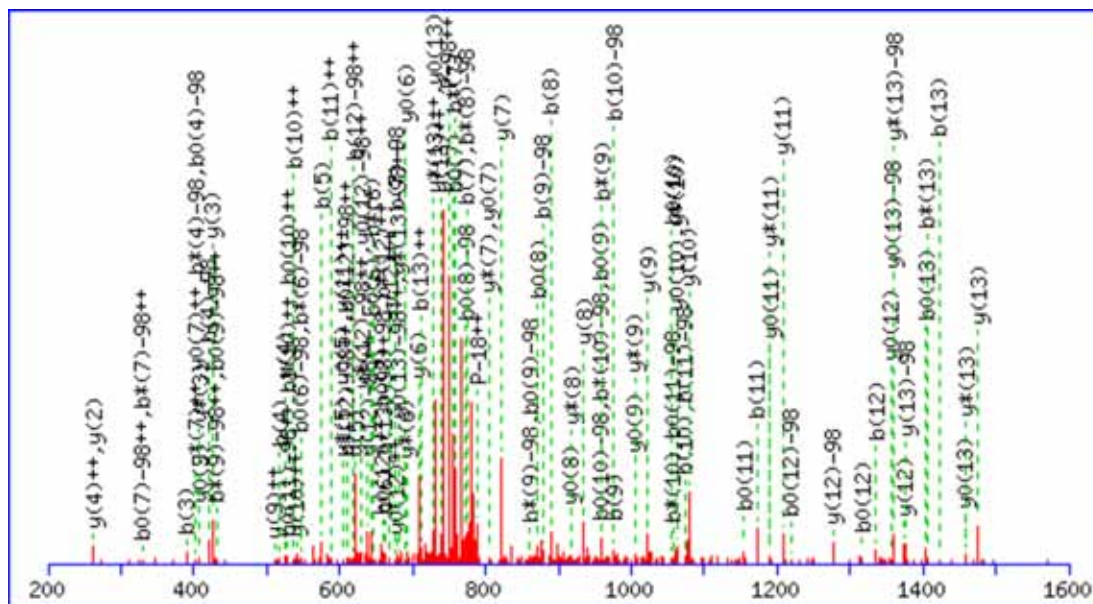

**Monoisotopic mass of neutral peptide Mr(calc): 1595.7405**

**Fixed modifications:** Carbamidomethyl (C) (apply to specified residues or termini only)

**Variable modifications:**

**N-term :** Dimethyl:2H(4)13C(2) (N-term)

**S3 :** Phospho (ST), with neutral losses 0.0000(shown in table), 97.9769

**Ions Score:** 74 **Expect:** 1.5e-006

**Matched b ions:** b(3), b(4)-98, b(4), b(5), b(6), b(7), b(7)-98, b(8), b(9), b(9)-98, b(10)++, b(10), b(10)-98, b(11), b(11)-98, b(11)++, b(12), b(12)-98, b(12)++, b(13), b(13)-98, b(13)++

**Matched y ions:** y(2), y(3), y(4)++, y(4), y(5), y(6), y(7), y(8), y(9), y(9)++, y(10)++, y(10), y(11), y(11)++, y(12), y(12)-98, y(12)-98, y(13), y(13)-98, y(13)++

**Precursor origin neutral loss:** +

## Peptide No.1047

**STSQGSINSPVYSR**

**Confirmed sites:** @S:3,@S:6

**Ambiguous sites:**

**MS/MS Fragmentation of STSQGSINSPVYSR**

Found in **ABLM1\_MOUSE**, Actin-binding LIM protein 1 OS=Mus musculus GN=Ablm1 PE=1 SV=1

Match to Query 4248: 1675.707852 from(838.861202,2+)

Title: Elution from: 35.493 to 35.493 scan no 2993 cid35.00 polarity:+:MA10



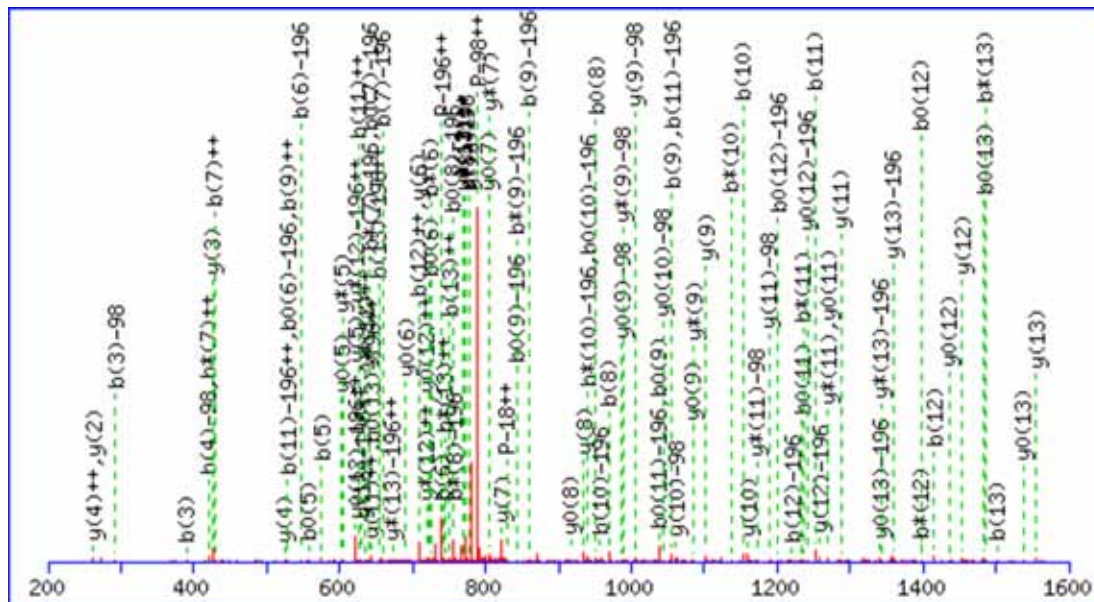

**Monoisotopic mass of neutral peptide Mr(calc):** 1675.7068

**Fixed modifications:** Carbamidomethyl (C) (apply to specified residues or termini only)

**Variable modifications:**

**N-term :** Dimethyl:2H(4)13C(2) (N-term)

**S3 :** Phospho (ST), with neutral losses 97.9769(shown in table), 0.0000

**S6 :** Phospho (ST), with neutral losses 97.9769(shown in table), 0.0000

**Ions Score:** 66 **Expect:** 6.8e-006

**Matched b ions:** b(3)-98, b(3), b(4)-98, b(5), b(6)-98, b(6)-196, b(6), b(7)-98, b(7)++, b(7)-196, b(8)-98, b(8), b(8)-196, b(9)++, b(9), b(9)-98, b(9)-196, b(10)-98++, b(10)-98, b(10)-196, b(10), b(11)-196++, b(11), b(11)-98, b(11)-196, b(11)++, b(12), b(12)++, b(12)-98, b(12)-196, b(12)-98++, b(13), b(13)-196++, b(13)++

**Matched y ions:** y(2), y(3), y(4)++, y(4), y(5), y(6), y(7), y(8), y(9), y(9)-98, y(10), y(10)-98, y(11)++, y(11)-98, y(11), y(12)-98, y(12)-196, y(12), y(12)-196++, y(13), y(13)-196, y(13)-98, y(13)-98++, y(13)++

**Precursor origin neutral loss:** +

## Peptide No.1048

**STSQGSINSPVYSR**

**Confirmed sites:** @T:2

**Ambiguous sites:**

MS/MS Fragmentation of **STSQGSINSPVYSR**

Found in **ABLM1\_MOUSE**, Actin-binding LIM protein 1 OS=Mus musculus GN=Ablm1 PE=1 SV=1

Match to Query 2604: 1595.741252 from(798.877902,2+)

Title: Elution from: 32.577 to 32.577 scan no 2457 cid35.00 polarity:+:MA10

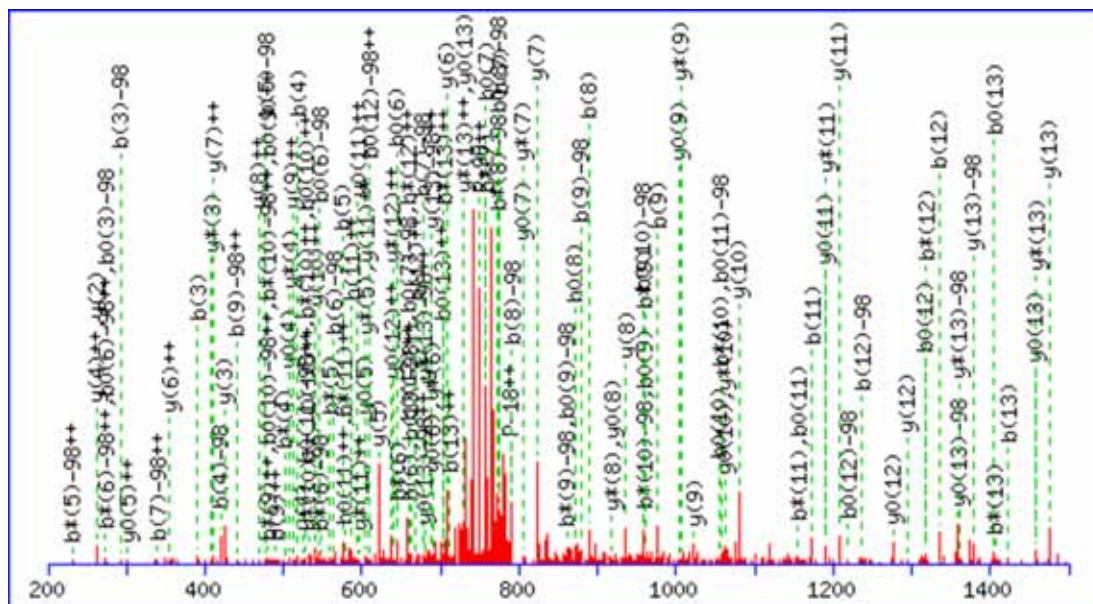

**Monoisotopic mass of neutral peptide Mr(calc):** 1595.7405

**Fixed modifications:** Carbamidomethyl (C) (apply to specified residues or termini only)

**Variable modifications:**

**N-term :** Dimethyl:2H(4)13C(2) (N-term)

**T2 :** Phospho (ST), with neutral losses 0.0000(shown in table), 97.9769

**Ions Score:** 53 **Expect:** 0.0002

**Matched b ions:** b(3)-98, b(3), b(4), b(4)-98, b(5), b(5)-98, b(6)-98, b(6), b(7)-98++, b(7)-98, b(7), b(8), b(8)-98, b(9), b(9)-98++, b(9)-98, b(9)++, b(11), b(11)++, b(12), b(12)-98, b(12)++, b(13), b(13)-98++, b(13)++

**Matched y ions:** y(2), y(3), y(4)++, y(4), y(5), y(6), y(6)++, y(7)++, y(7), y(8), y(8)++, y(9), y(9)++, y(10), y(10)++, y(11), y(11)++, y(12), y(13), y(13)-98, y(13)-98++

**Precursor origin neutral loss:** +

## Peptide No.1049

**SVKSPLLIR**

**Confirmed sites:** @S:4

**Ambiguous sites:**

**MS/MS Fragmentation of SVKSPLLIR**

Found in **TITIN\_MOUSE**, Titin OS=Mus musculus GN=Ttn PE=1 SV=1

Match to Query 1548: 1159.736922 from(580.875737,2+)

Title: Elution from: 35.478 to 35.478 scan no 2991 cid35.00 polarity:+MA10

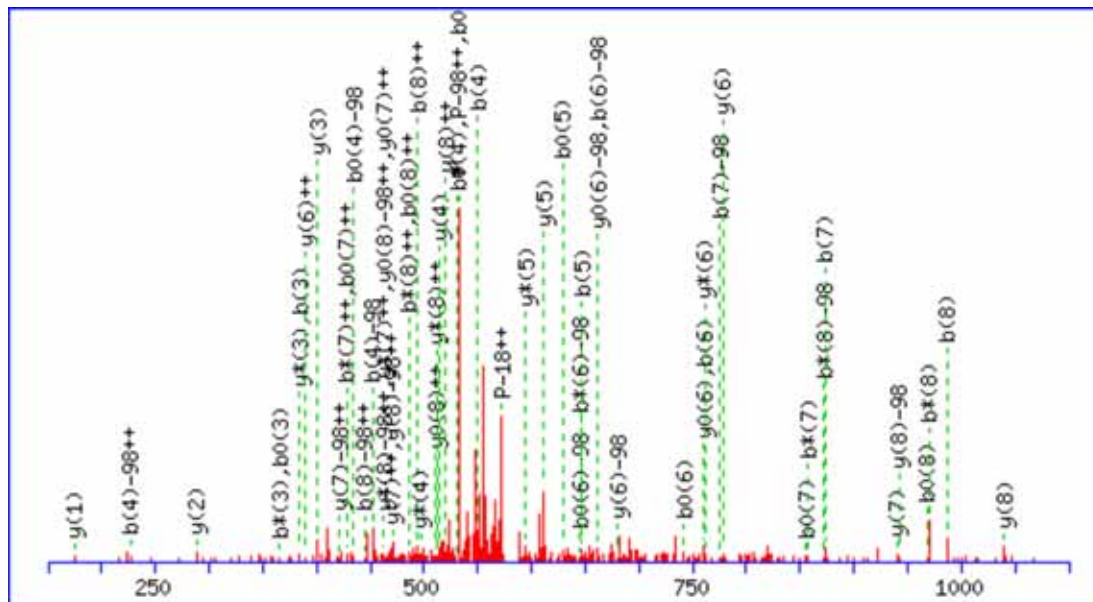

**Monoisotopic mass of neutral peptide Mr(calc):** 1159.7366

**Fixed modifications:** Carbamidomethyl (C) (apply to specified residues or termini only)

**Variable modifications:**

**N-term :** Dimethyl:2H(4)13C(2) (N-term)

**K3 :** Dimethyl:2H(4)13C(2) (K)

**S4 :** Phospho (ST), with neutral losses 0.0000(shown in table), 97.9769

**Ions Score:** 24 **Expect:** 0.053

**Matched b ions:** b(3), b(4)-98, b(4)-98++, b(4), b(5), b(6), b(6)-98, b(7), b(7)-98, b(8), b(8)-98++, b(8)++

**Matched y ions:** y(1), y(2), y(3), y(4), y(5), y(6), y(6)++, y(6)-98, y(7), y(7)++, y(7)-98++, y(8), y(8)-98++, y(8)++, y(8)-98

**Precursor origin neutral loss:** +

## Peptide No.1050

**SVPTVDSGNEDDDSSFK**

**Confirmed sites:** @S:7

**Ambiguous sites:**

MS/MS Fragmentation of **SVPTVDSGNEDDDSSFK**

Found in **IF2P\_MOUSE**, Eukaryotic translation initiation factor 5B OS=Mus musculus GN=Eif5b PE=1 SV=2

Match to Query 5289: 1933.782588 from(967.898570,2+)

Title: Elution from: 39.193 to 39.193 scan no 3558 cid35.00 polarity:+:MA10:m1s

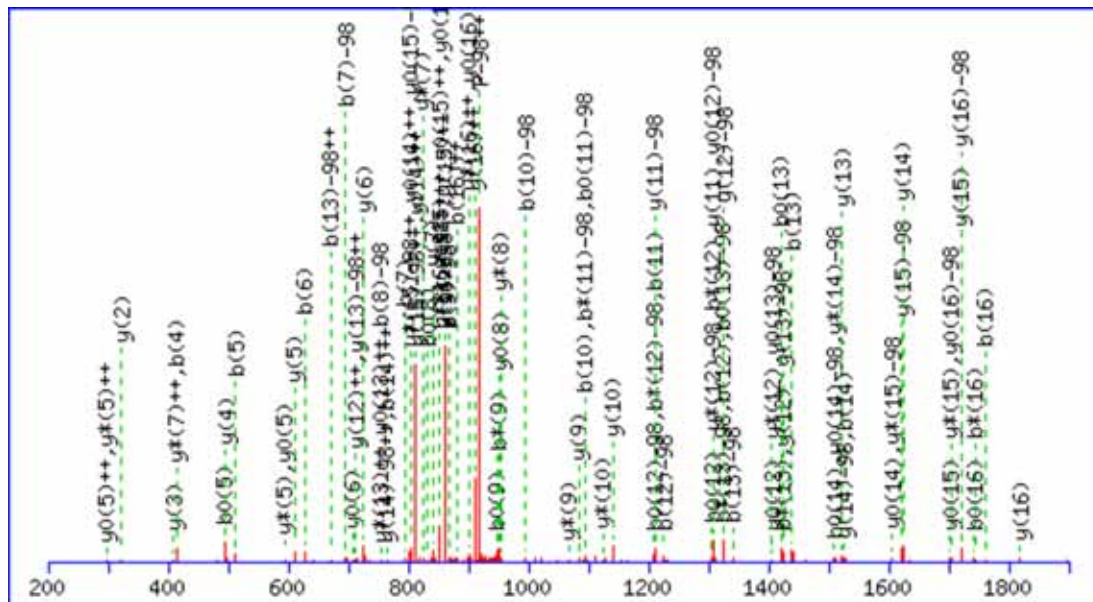

**Monoisotopic mass of neutral peptide Mr(calc):** 1933.7830

**Fixed modifications:** Carbamidomethyl (C) (apply to specified residues or termini only)

**Variable modifications:**

**N-term :** Dimethyl (N-term)

**S7 :** Phospho (ST), with neutral losses 97.9769(shown in table), 0.0000

**K17 :** Dimethyl (K)

**Ions Score:** 98 **Expect:** 5.1e-009

**Matched b ions:** b(4), b(5), b(6), b(7)-98, b(7), b(8), b(8)-98, b(9)-98, b(10), b(10)-98, b(11), b(12)-98, b(12), b(13), b(13)-98, b(13)-98++, b(14), b(14)++, b(16), b(16)++

**Matched y ions:** y(2), y(3), y(4), y(5), y(6), y(7), y(9), y(10), y(11)-98, y(11), y(12)-98, y(12), y(12)++, y(13), y(13)-98, y(13)-98++, y(14), y(14)++, y(14)-98, y(14)-98++, y(15)++, y(15)-98++, y(15)-98, y(15), y(16)-98++, y(16)-98, y(16), y(16)++

**Precursor origin neutral loss:** +

## Peptide No.1051

**SVPTVDSGNEDDDSSFK**

**Confirmed sites:** @S:7

**Ambiguous sites:**

MS/MS Fragmentation of **SVPTVDSGNEDDDSSFK**

Found in **IF2P\_MOUSE**, Eukaryotic translation initiation factor 5B OS=Mus musculus GN=Eif5b PE=1 SV=2

Match to Query 4306: 1945.846922 from(973.930737,2+)

Title: Elution from: 39.070 to 39.070 scan no 3299 cid35.00 polarity:+:MA10:m1s



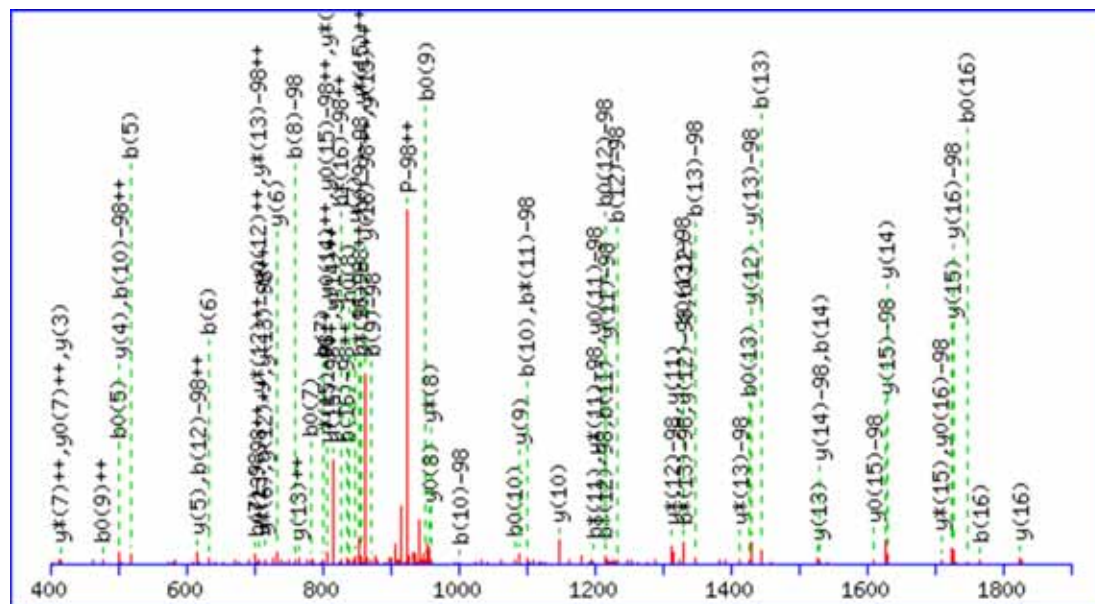

**Monoisotopic mass of neutral peptide Mr(calc):** 1945.8466

**Fixed modifications:** Carbamidomethyl (C) (apply to specified residues or termini only)

**Variable modifications:**

**N-term :** Dimethyl:2H(4)13C(2) (N-term)

**S7 :** Phospho (ST), with neutral losses 0.0000(shown in table), 97.9769

**K17 :** Dimethyl:2H(4)13C(2) (K)

**Ions Score:** 82 **Expect:** 3.2e-007

**Matched b ions:** b(5), b(6), b(7)-98, b(7), b(8)-98, b(9)-98, b(10)-98++, b(10), b(10)-98, b(11), b(12)-98++, b(12), b(12)-98, b(13), b(13)-98, b(14), b(16), b(16)-98++

**Matched y ions:** y(3), y(4), y(5), y(6), y(7), y(9), y(10), y(11)-98, y(11), y(12)-98, y(12), y(12)++, y(13), y(13)++, y(13)-98, y(13)-98++, y(14)++, y(14), y(14)-98, y(15)++, y(15)-98, y(15), y(15)-98++, y(16)-98++, y(16), y(16)-98

**Precursor origin neutral loss:** +

## Peptide No.1052

**SVSENSLVAMDFSGEK**

**Confirmed sites:** @S:3

**Ambiguous sites:**

**MS/MS Fragmentation of SVSENSLVAMDFSGEK**

Found in **GRB14\_MOUSE**, Growth factor receptor-bound protein 14 OS=Mus musculus GN=Grb14 PE=1 SV=1

Match to Query 3781: 1862.866420 from(932.440486,2+)

Title: Elution from: 48.409 to 48.409 scan no 4375 cid35.00 polarity:+:MA10

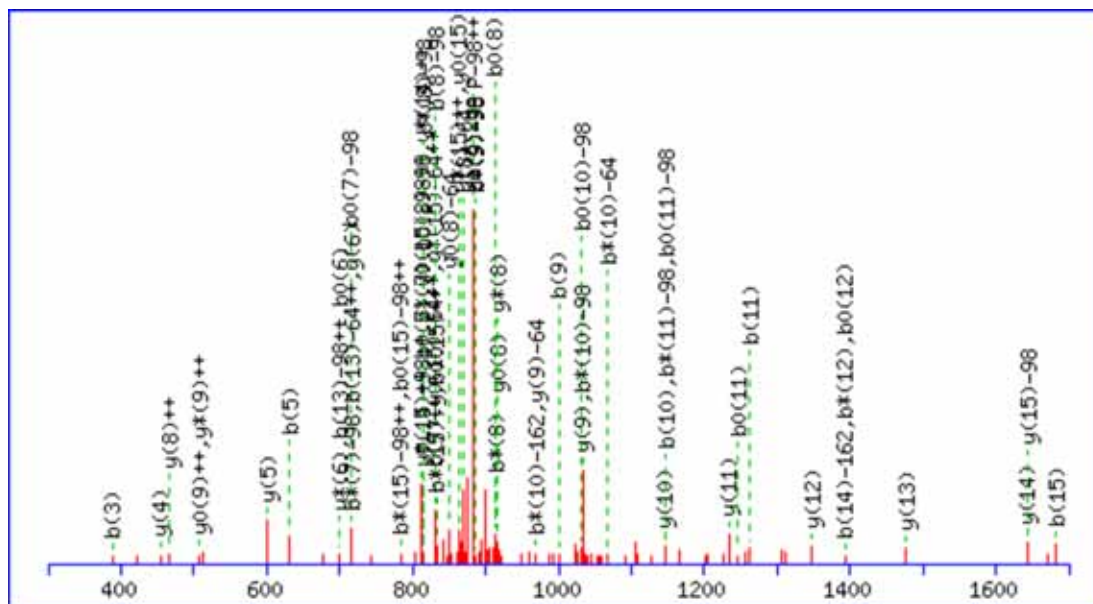

**Monoisotopic mass of neutral peptide Mr(calc):** 1862.8645

**Fixed modifications:** Carbamidomethyl (C) (apply to specified residues or termini only)

**Variable modifications:**

**N-term :** Dimethyl:2H(4)13C(2) (N-term)

**S3 :** Phospho (ST), with neutral losses 0.0000(shown in table), 97.9769

**M10 :** Oxidation (M), with neutral losses 0.0000(shown in table), 63.9983

**K16 :** Dimethyl:2H(4)13C(2) (K)

**Ions Score:** 47 **Expect:** 0.0011

**Matched b ions:** b(3), b(5), b(7), b(8)-98, b(9), b(10), b(11), b(13)-98++, b(15)

**Matched y ions:** y(4), y(5), y(6), y(7), y(8)++, y(9), y(10), y(11), y(12), y(13), y(14), y(15)-98

**Precursor origin neutral loss:** +

## Peptide No.1053

**SYELPDGQVITIGNER**

**Confirmed sites:** @S:1

**Ambiguous sites:**

MS/MS Fragmentation of **SYELPDGQVITIGNER**

Found in **ACTA\_MOUSE**, Actin, aortic smooth muscle OS=Mus musculus GN=Acta2 PE=1 SV=1

Match to Query 4384: 1897.882490 from(949.948521,2+)

Title: Elution from: 61.127 to 61.127 scan no 5803 cid35.00 polarity:+:MA10

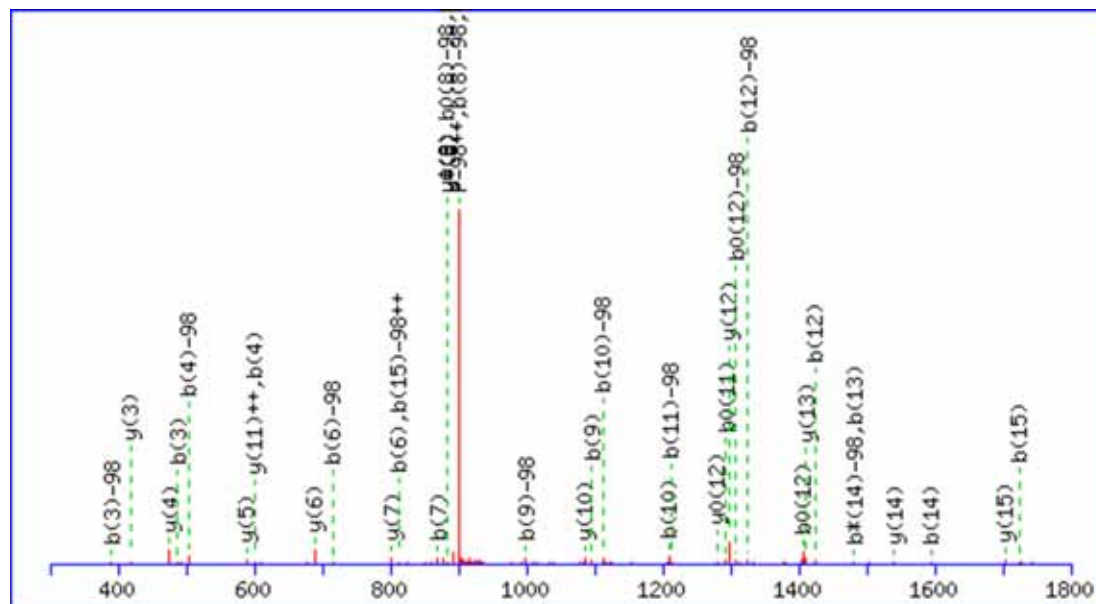

**Monoisotopic mass of neutral peptide Mr(calc):** 1897.8822

**Fixed modifications:** Carbamidomethyl (C) (apply to specified residues or termini only)

**Variable modifications:**

**N-term :** Dimethyl (N-term)

**S1 :** Phospho (ST), with neutral losses 97.9769(shown in table), 0.0000

**Ions Score:** 95 **Expect:** 2e-008

**Matched b ions:** b(3)-98, b(3), b(4)-98, b(4), b(6)-98, b(6), b(7), b(8)-98, b(9)-98, b(9), b(10)-98, b(10), b(11)-98, b(12)-98, b(12), b(13), b(14), b(15), b(15)-98++

**Matched y ions:** y(3), y(4), y(5), y(6), y(7), y(8), y(10), y(11)++, y(12), y(13), y(14), y(15)

**Precursor origin neutral loss:** +

## Peptide No.1054

**SYELPDGQVITIGNER**

**Confirmed sites:**

**Ambiguous sites:** @S:1orY:2

**MS/MS Fragmentation of SYELPDGQVITIGNER**

Found in **ACTS\_MOUSE**, Actin, alpha skeletal muscle OS=Mus musculus GN=Acta1 PE=1 SV=1

Match to Query 4622: 1897.882113 from(633.634647,3+)

Title: Elution from: 61.063 to 61.063 scan no 5826 cid35.00 polarity:+:MA10:m1s

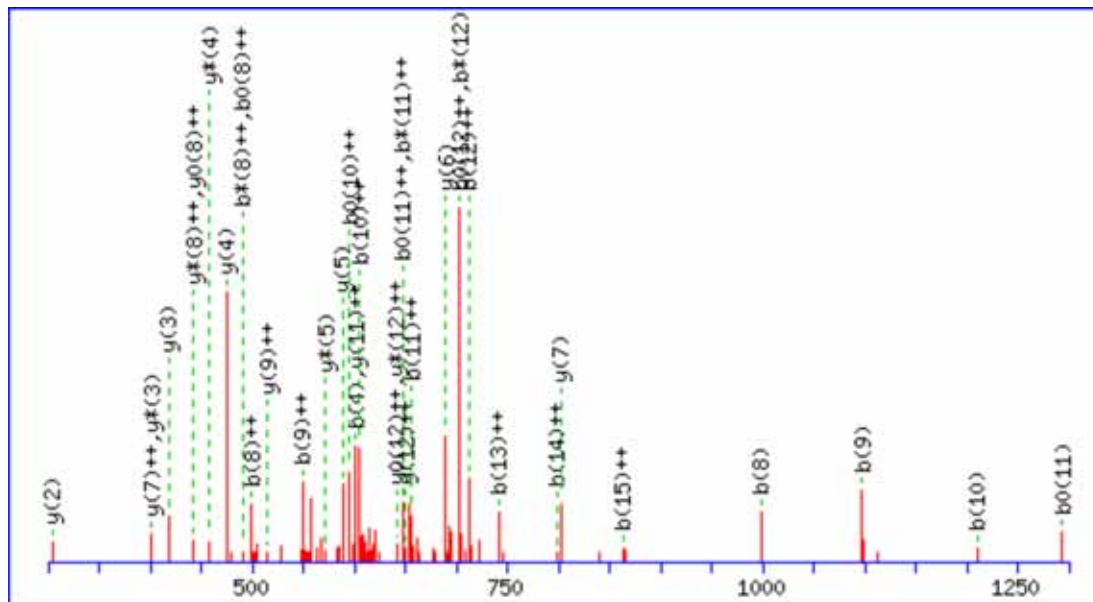

**Monoisotopic mass of neutral peptide Mr(calc):** 1897.8822

**Fixed modifications:** Carbamidomethyl (C) (apply to specified residues or termini only)

**Variable modifications:**

**N-term :** Dimethyl (N-term)

**Y2 :** Phospho (Y)

**Ions Score:** 50 **Expect:** 0.00055

**Matched b ions:** b(4), b(8), b(8)++, b(9), b(9)++, b(10), b(10)++, b(11)++, b(12)++, b(13)++, b(14)++, b(15)++

**Matched y ions:** y(2), y(3), y(4), y(5), y(6), y(7)++, y(7), y(9)++, y(11)++, y(12)++

**Precursor origin neutral loss:** +

## Peptide No.1055

**SYELPDGQVITIGNER**

**Confirmed sites:** @S:1

**Ambiguous sites:**

**MS/MS Fragmentation of SYELPDGQVITIGNER**

Found in **ACTA\_MOUSE**, Actin, aortic smooth muscle OS=Mus musculus GN=Acta2 PE=1 SV=1

Match to Query 3927: 1903.915538 from(952.965045,2+)

Title: Elution from: 61.151 to 61.151 scan no 5668 cid35.00 polarity:+:MA10



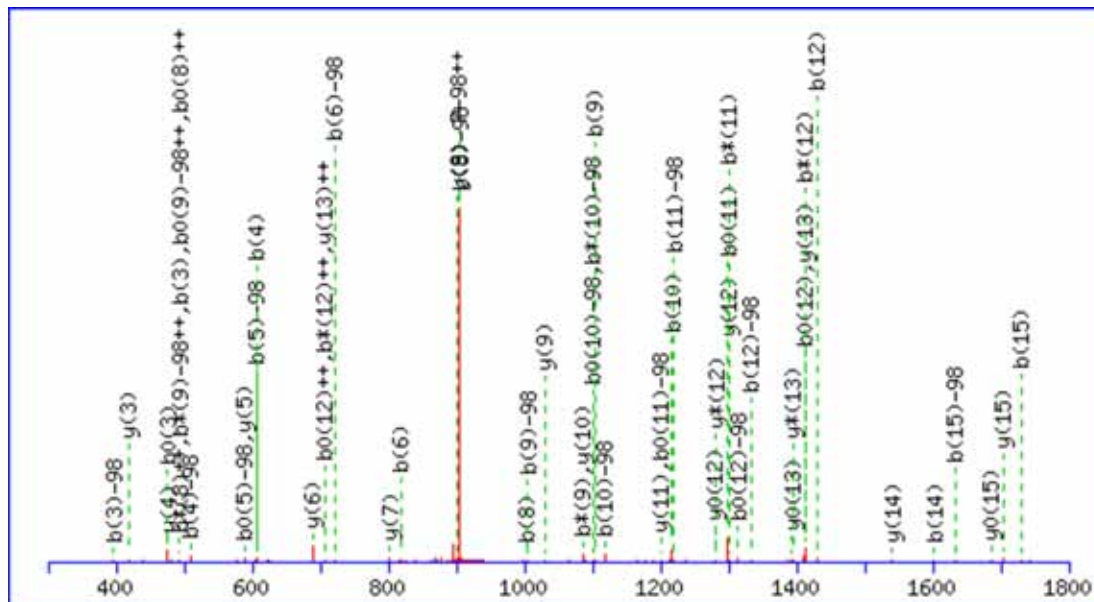

**Monoisotopic mass of neutral peptide Mr(calc):** 1903.9141

**Fixed modifications:** Carbamidomethyl (C) (apply to specified residues or termini only)

**Variable modifications:**

**N-term :** Dimethyl:2H(4)13C(2) (N-term)

**S1 :** Phospho (ST), with neutral losses 97.9769(shown in table), 0.0000

**Ions Score:** 89 **Expect:** 8.1e-008

**Matched b ions:** b(3)-98, b(3), b(4)-98, b(4), b(5)-98, b(6)-98, b(6), b(8), b(8)-98, b(9)-98, b(9), b(10)-98, b(10), b(11)-98, b(12), b(12)-98, b(14), b(15)-98, b(15)

**Matched y ions:** y(3), y(4), y(5), y(6), y(7), y(8), y(9), y(10), y(11), y(12), y(13), y(13)++, y(14), y(15)

**Precursor origin neutral loss:** +

## Peptide No.1056

**SYELPDGQVITIGNER**

**Confirmed sites:**

**Ambiguous sites:** @S:1orY:2

**MS/MS Fragmentation of SYELPDGQVITIGNER**

Found in **ACTA\_MOUSE**, Actin, aortic smooth muscle OS=Mus musculus GN=Acta2 PE=1 SV=1

Match to Query 4531: 1903.915716 from(635.645848,3+)

Title: Elution from: 61.041 to 61.041 scan no 5807 cid35.00 polarity:+:MA10:m1s

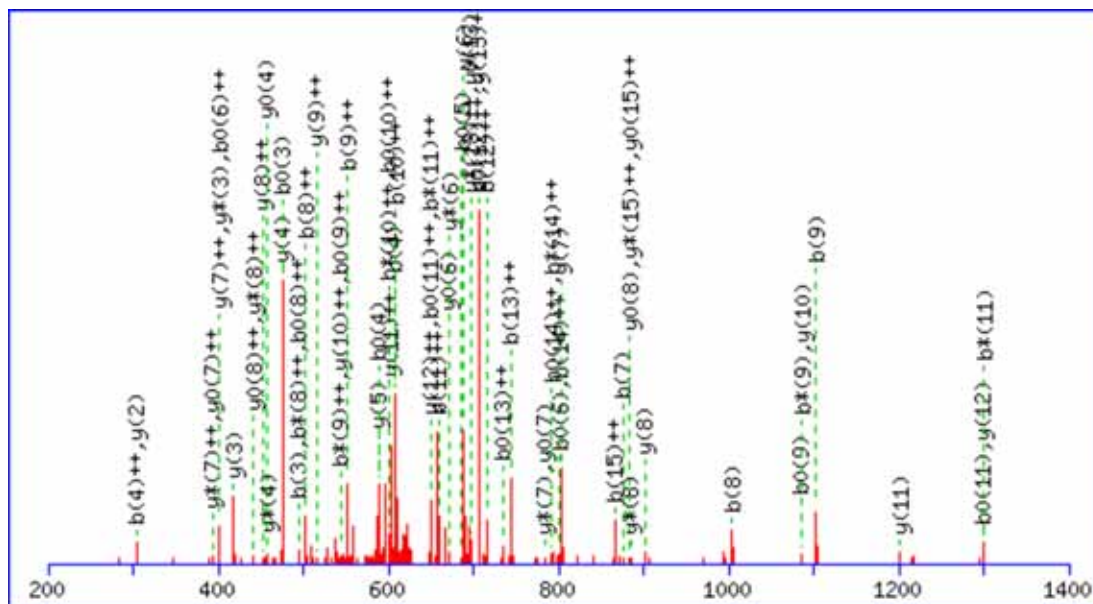

**Monoisotopic mass of neutral peptide Mr(calc):** 1903.9141

**Fixed modifications:** Carbamidomethyl (C) (apply to specified residues or termini only)

**Variable modifications:**

**N-term :** Dimethyl:2H(4)13C(2) (N-term)

**Y2 :** Phospho (Y)

**Ions Score:** 61 **Expect:** 4.8e-005

**Matched b ions:** b(3), b(4)++, b(4), b(7), b(8), b(8)++, b(9)++, b(9), b(10)++, b(11)++, b(12)++, b(13)++, b(14)++, b(15)++

**Matched y ions:** y(2), y(3), y(4), y(5), y(6), y(7), y(7)++, y(8), y(8)++, y(9)++, y(10), y(10)++, y(11), y(11)++, y(12), y(12)++, y(13)++

**Precursor origin neutral loss:** +

## Peptide No.1057

**TAQVPSPPR**

**Confirmed sites:** @S:6

**Ambiguous sites:**

MS/MS Fragmentation of **TAQVPSPPR**

Found in **ACINU\_MOUSE**, Apoptotic chromatin condensation inducer in the nucleus OS=Mus musculus GN=Acin1 PE=1 SV=2

Match to Query 649: 1059.511204 from(530.762878,2+)

Title: Elution from: 29.972 to 29.972 scan no 2301 cid35.00 polarity:+:MA10

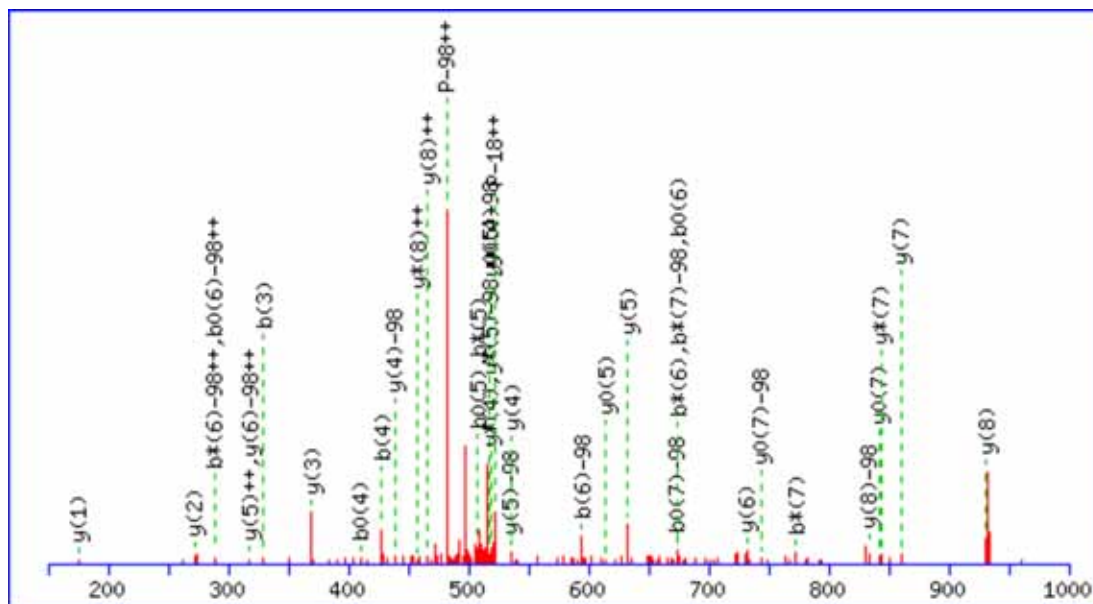

**Monoisotopic mass of neutral peptide Mr(calc):** 1059.5114

**Fixed modifications:** Carbamidomethyl (C) (apply to specified residues or termini only)

**Variable modifications:**

**N-term :** Dimethyl (N-term)

**S6 :** Phospho (ST), with neutral losses 0.0000(shown in table), 97.9769

**Ions Score:** 39 **Expect:** 0.0024

**Matched b ions:** b(3), b(4), b(6)-98

**Matched y ions:** y(1), y(2), y(3), y(4)-98, y(4), y(5), y(5)++, y(5)-98, y(6), y(6)-98++, y(7), y(8), y(8)-98, y(8)++

**Precursor origin neutral loss:** +

## Peptide No.1058

**TARPNSEAPLSGSEDADDSNK**

**Confirmed sites:** @S:11

**Ambiguous sites:**

**MS/MS Fragmentation of TARPNSEAPLSGSEDADDSNK**

Found in **IF2P\_MOUSE**, Eukaryotic translation initiation factor 5B OS=Mus musculus GN=Eif5b PE=1 SV=2

Match to Query 5951: 2295.987234 from(766.336354,3+)

Title: Elution from: 26.404 to 26.404 scan no 1637 cid35.00 polarity:+:MA10:m1s

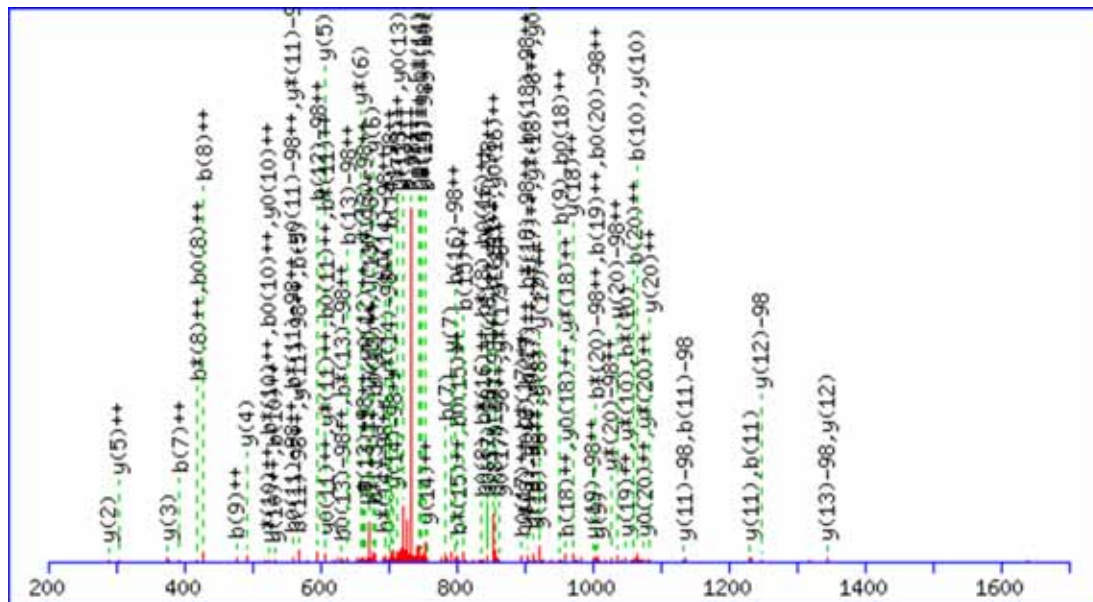

**Monoisotopic mass of neutral peptide Mr(calc):** 2295.9856

**Fixed modifications:** Carbamidomethyl (C) (apply to specified residues or termini only)

**Variable modifications:**

**N-term :** Dimethyl (N-term)

**S11 :** Phospho (ST), with neutral losses 97.9769(shown in table), 0.0000

**K21 :** Dimethyl (K)

**Ions Score:** 93 **Expect:** 2.9e-008

**Matched b ions:** b(5), b(7)++, b(7), b(8)++, b(8), b(9)++, b(9), b(10), b(10)++, b(11)-98++, b(11), b(11)-98, b(12)-98++, b(13)-98++, b(14)++, b(14)-98++, b(15)++, b(16)++, b(16)-98++, b(17)-98++, b(17)++, b(18)-98++, b(18)++, b(19)++, b(20)++

**Matched y ions:** y(2), y(3), y(4), y(5)++, y(5), y(6), y(7), y(8), y(9), y(10), y(10)++, y(11)-98++, y(11), y(11)-98, y(12)++, y(12), y(12)-98, y(13)-98++, y(13)-98, y(13)++, y(14)-98++, y(14)++, y(17)++, y(18)-98++, y(18)++, y(19)++, y(19)-98++, y(20)-98++, y(20)++

**Precursor origin neutral loss:** +

## Peptide No.1059

**TARPNSEAPLSGSEDADDSNK**

**Confirmed sites:** @S:11,@S:13

**Ambiguous sites:**

MS/MS Fragmentation of **TARPNSEAPLSGSEDADDSNK**

Found in **IF2P\_MOUSE**, Eukaryotic translation initiation factor 5B OS=Mus musculus GN=Eif5b PE=1 SV=2

Match to Query 7246: 2375.953269 from(792.991699,3+)

Title: Elution from: 27.442 to 27.442 scan no 1953 cid35.00 polarity:+:MA10:m1s



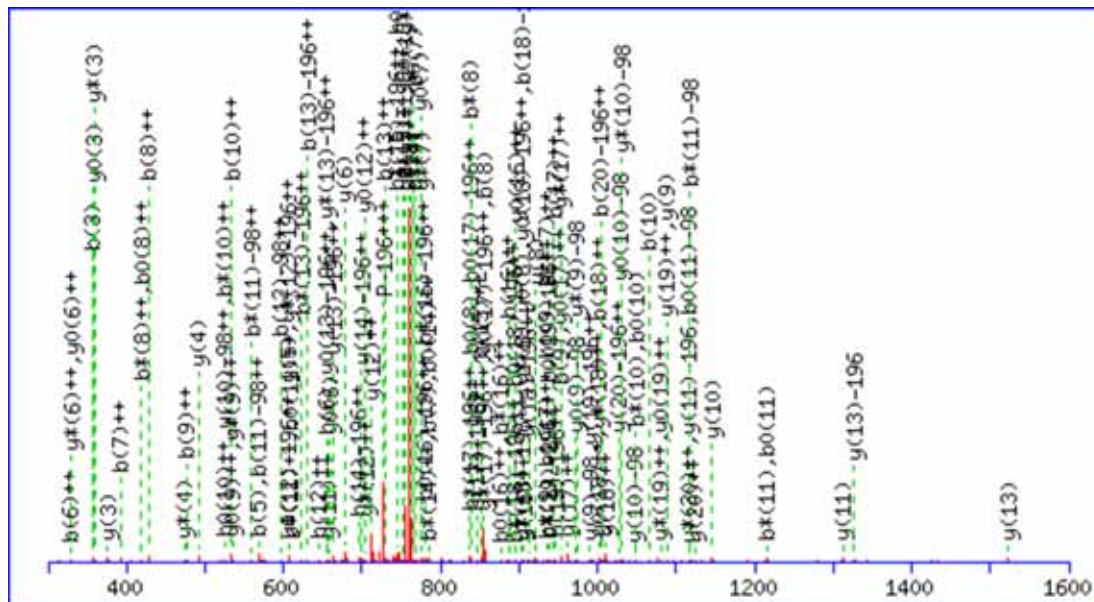

**Monoisotopic mass of neutral peptide Mr(calc):** 2375.9519

**Fixed modifications:** Carbamidomethyl (C) (apply to specified residues or termini only)

**Variable modifications:**

**N-term :** Dimethyl (N-term)

**S11 :** Phospho (ST), with neutral losses 97.9769(shown in table), 0.0000

**S13 :** Phospho (ST), with neutral losses 97.9769(shown in table), 0.0000

**K21 :** Dimethyl (K)

**Ions Score:** 59 **Expect:** 5.2e-005

**Matched b ions:** b(3), b(5), b(6)++, b(6), b(7)++, b(7), b(8)++, b(8), b(9)++, b(9), b(10)++, b(10), b(11)-98++, b(12)-98++, b(12)++, b(13)-98++, b(13)-196++, b(13)++, b(14)-196++, b(14)-98++, b(15)++, b(15)-196++, b(15)-98++, b(16)-98++, b(16)++, b(17)-98++, b(17)++, b(17)-196++, b(18)-98++, b(18)++, b(18)-196++, b(19)-196++, b(20)-196++

**Matched y ions:** y(3), y(4), y(5), y(6), y(8), y(9)-98, y(9), y(10), y(10)-98, y(10)-98++, y(11), y(11)-98, y(11)-196, y(11)-98++, y(11)++, y(12)++, y(12)-98, y(12)-98++, y(13)-98++, y(13)-98, y(13), y(13)-196, y(13)-196++, y(13)++, y(14)-196++, y(14)-98++, y(15)-98++, y(16)-98++, y(16)++, y(17)++, y(17)-98++, y(18)++, y(18)-98++, y(18)-196++, y(19)-98++, y(19)-196++, y(19)++, y(20)-98++, y(20)++, y(20)-196++

**Precursor origin neutral loss:** +

## Peptide No.1060

**TARPNSEAPLSGSEDADDSNK**

**Confirmed sites:** @S:11,@S:13

**Ambiguous sites:**

MS/MS Fragmentation of **TARPNSEAPLSGSEDADDSNK**

Found in **IF2P\_MOUSE**, Eukaryotic translation initiation factor 5B OS=Mus musculus GN=Eif5b PE=1 SV=2

Match to Query 5747: 2388.017823 from(797.013217,3+)

Title: Elution from: 27.382 to 27.382 scan no 1801 cid35.00 polarity:+:MA10:m1s

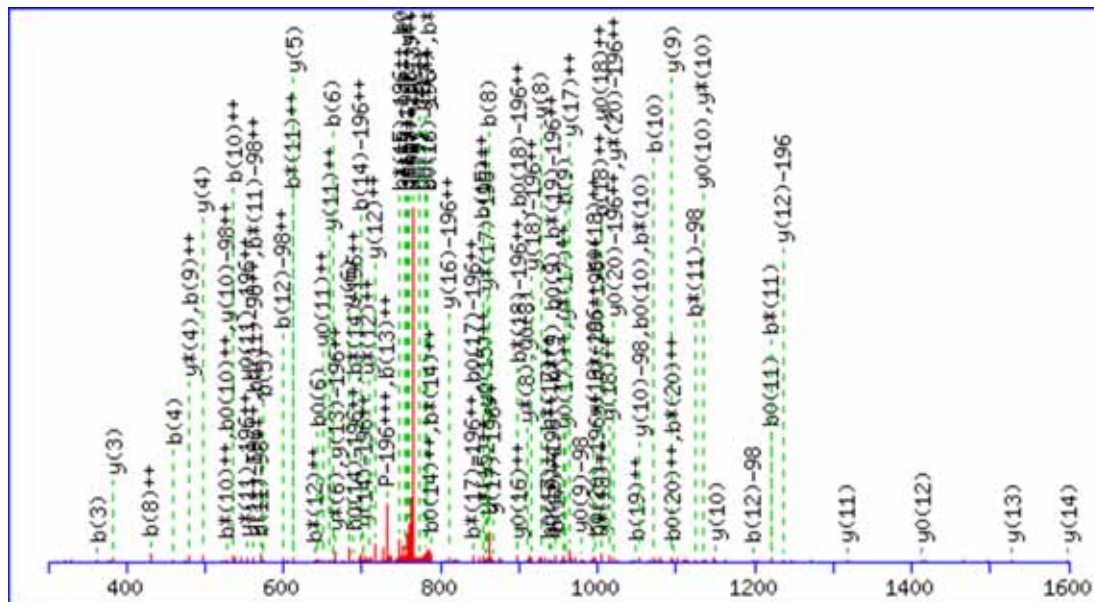

**Monoisotopic mass of neutral peptide Mr(calc):** 2388.0155

**Fixed modifications:** Carbamidomethyl (C) (apply to specified residues or termini only)

**Variable modifications:**

**N-term :** Dimethyl:2H(4)13C(2) (N-term)

**S11 :** Phospho (ST), with neutral losses 0.0000(shown in table), 97.9769

**S13 :** Phospho (ST), with neutral losses 0.0000(shown in table), 97.9769

**K21 :** Dimethyl:2H(4)13C(2) (K)

**Ions Score:** 38 **Expect:** 0.011

**Matched b ions:** b(3), b(4), b(5), b(6), b(8)++, b(8), b(9)++, b(9), b(10), b(10)++, b(11)-98++, b(12)-98, b(12)-98++, b(13)-98++, b(13)++, b(14)-196++, b(14)-98++, b(15)++, b(15)-196++, b(15)-98++, b(16)-98++, b(17)-98++, b(17)++, b(18)++, b(18)-98++, b(19)++, b(19)-98++

**Matched y ions:** y(3), y(4), y(5), y(6), y(8), y(9), y(10)-98, y(10), y(10)-98++, y(11)-98, y(11)-196++, y(11), y(11)++, y(12)++, y(12)-98++, y(12)-196, y(13)-98++, y(13)++, y(13), y(13)-196++, y(14), y(14)-98++, y(14)-196++, y(16)-98++, y(16)-196++, y(17)++, y(17)-98++, y(17)-196++, y(18)-98++, y(18)++, y(18)-196++, y(19)-196++, y(19)-98++, y(20)-98++

**Precursor origin neutral loss:** +

## Peptide No.1061

**TASESISNLSEAGSVK**

**Confirmed sites:** @S:10,@S:14

**Ambiguous sites:**

**MS/MS Fragmentation of TASESISNLSEAGSVK**

Found in **CLIP1\_MOUSE**, CAP-Gly domain-containing linker protein 1 OS=Mus musculus GN=Clip1 PE=1 SV=1

Match to Query 4273: 1794.769182 from(898.391867,2+)

Title: Elution from: 39.815 to 39.815 scan no 3641 cid35.00 polarity:+:MA10



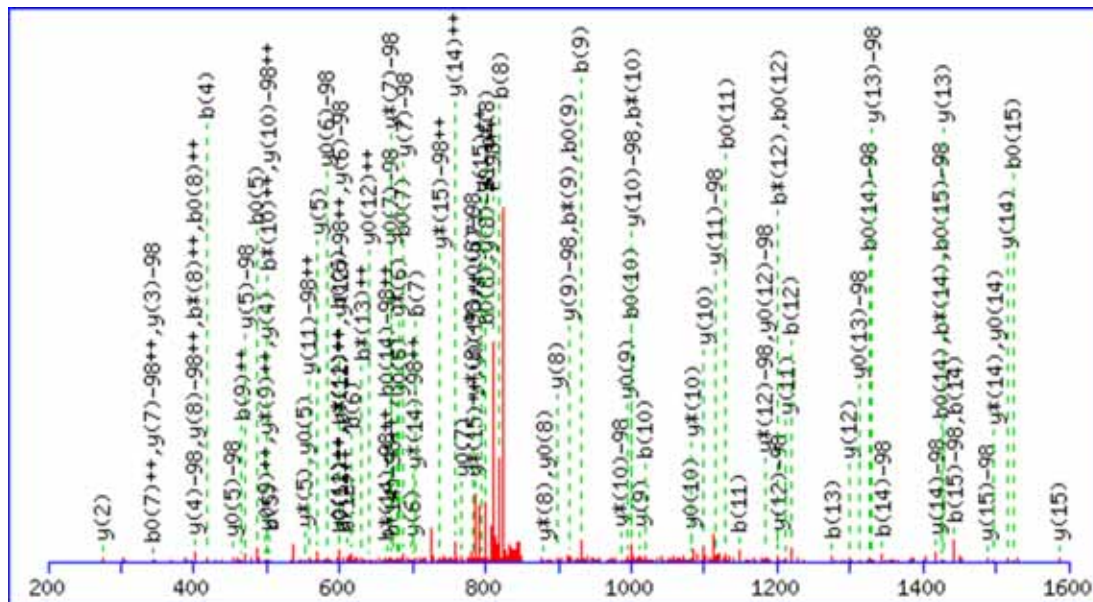

**Monoisotopic mass of neutral peptide Mr(calc):** 1714.8026

**Fixed modifications:** Carbamidomethyl (C) (apply to specified residues or termini only)

**Variable modifications:**

**N-term :** Dimethyl (N-term)

**S14 :** Phospho (ST), with neutral losses 97.9769(shown in table), 0.0000

**K16 :** Dimethyl (K)

**Ions Score:** 71 **Expect:** 3.8e-006

**Matched b ions:** b(4), b(5), b(6), b(7), b(8), b(9), b(9)++, b(10), b(11), b(12), b(12)++, b(13), b(14)-98, b(14), b(14)-98++, b(15)-98

**Matched y ions:** y(2), y(3)-98, y(4)-98, y(4), y(5)-98, y(5), y(6)-98, y(6), y(7)-98, y(7)-98++, y(7), y(8)-98++, y(8)-98, y(8), y(9)-98, y(9), y(10)-98, y(10), y(10)-98++, y(11), y(11)-98++, y(11)-98, y(12), y(12)-98++, y(12)-98, y(13)-98, y(13), y(14), y(14)-98, y(14)++, y(15), y(15)-98, y(15)++

**Precursor origin neutral loss:** +

## Peptide No.1063

**TASLTSAASIDGSR**

**Confirmed sites:** @S:3

**Ambiguous sites:**

**MS/MS Fragmentation of TASLTSAASIDGSR**

Found in **NDRG2\_MOUSE**, Protein NDRG2 OS=Mus musculus GN=Ndr2 PE=1 SV=1

Match to Query 2972: 1443.661080 from(722.837816,2+)

Title: Elution from: 37.215 to 37.215 scan no 3245 cid35.00 polarity:+:MA10



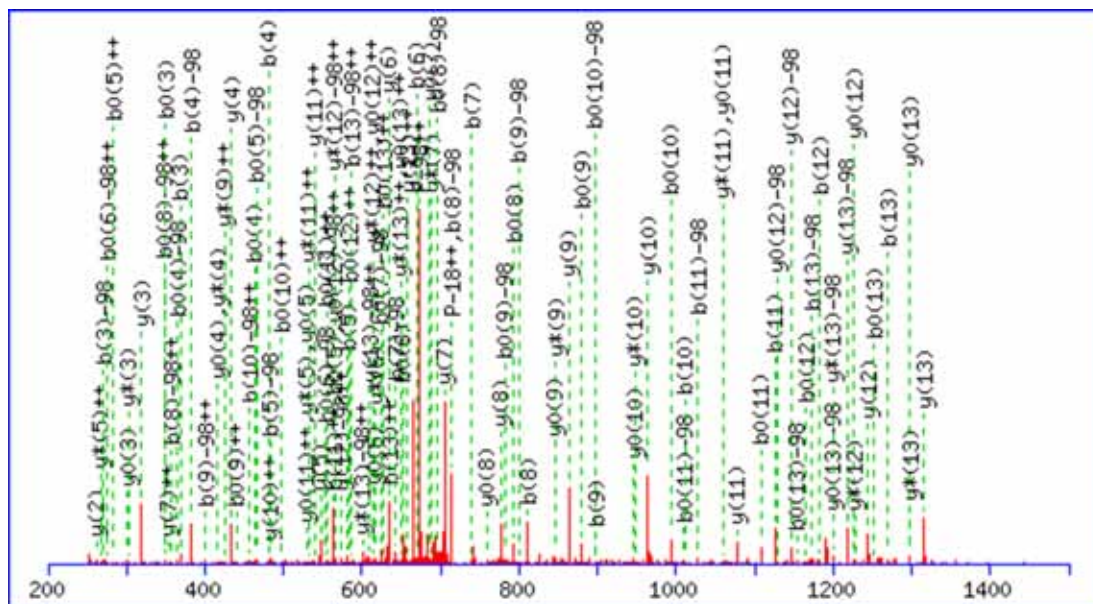

**Monoisotopic mass of neutral peptide Mr(calc):** 1443.6606

**Fixed modifications:** Carbamidomethyl (C) (apply to specified residues or termini only)

**Variable modifications:**

**N-term :** Dimethyl (N-term)

**S3 :** Phospho (ST), with neutral losses 97.9769(shown in table), 0.0000

**Ions Score:** 80 **Expect:** 2.9e-007

**Matched b ions:** b(3)-98, b(3), b(4)-98, b(4), b(5)-98, b(5), b(6), b(7)-98, b(7), b(8), b(8)-98, b(8)-98++, b(9)-98++, b(9)-98, b(9), b(10)-98++, b(10), b(11), b(11)++, b(11)-98, b(12), b(13)-98, b(13), b(13)-98++, b(13)++

**Matched y ions:** y(2), y(3), y(4), y(5), y(6), y(7), y(7)++, y(8), y(9), y(10), y(10)++, y(11), y(11)++, y(12), y(12)-98, y(12)-98++, y(13)-98, y(13), y(13)-98++, y(13)++

**Precursor origin neutral loss:** +

## Peptide No.1064

**TASLTSAASIDGSR**

**Confirmed sites:** @S:3,@S:6

**Ambiguous sites:**

**MS/MS Fragmentation of TASLTSAASIDGSR**

Found in **NDRG2\_MOUSE**, Protein NDRG2 OS=Mus musculus GN=Ndr2 PE=1 SV=1

Match to Query 3368: 1523.627988 from(762.821270,2+)

Title: Elution from: 40.458 to 40.458 scan no 3703 cid35.00 polarity:+:MA10

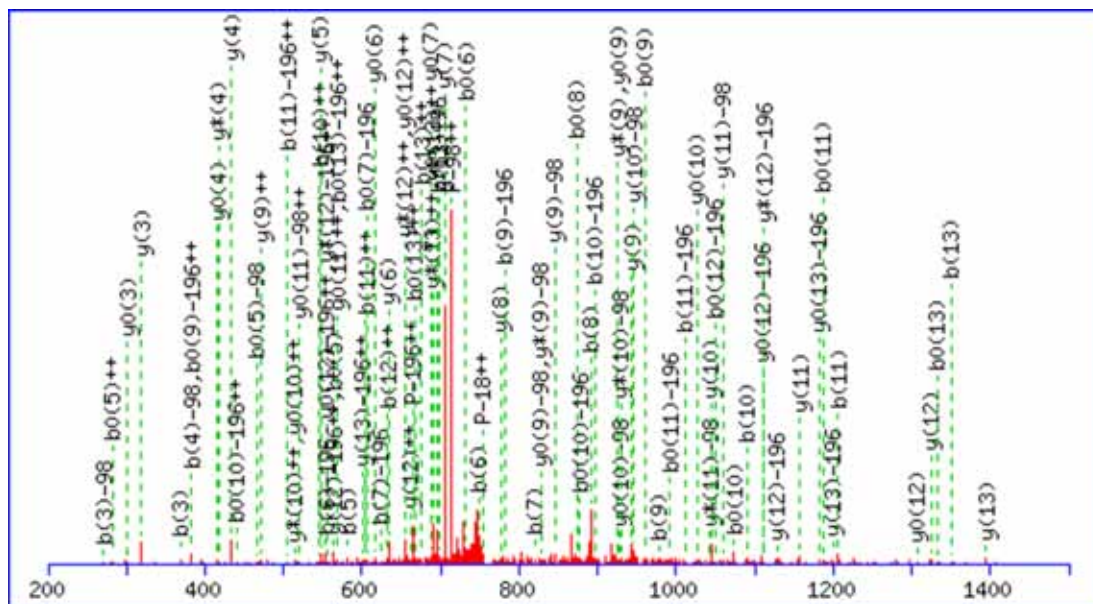

**Monoisotopic mass of neutral peptide Mr(calc):** 1523.6270

**Fixed modifications:** Carbamidomethyl (C) (apply to specified residues or termini only)

**Variable modifications:**

**N-term :** Dimethyl (N-term)

**S3 :** Phospho (ST), with neutral losses 0.0000(shown in table), 97.9769

**S6 :** Phospho (ST), with neutral losses 0.0000(shown in table), 97.9769

**Ions Score:** 64 **Expect:** 8e-006

**Matched b ions:** b(3), b(3)-98, b(4)-98, b(5), b(6)-196, b(6), b(6)-98, b(7)-196, b(7)-98, b(7), b(8), b(8)-98, b(8)-98++, b(8)-196, b(9), b(9)-98++, b(9)-196, b(9)-98, b(10)-98, b(10), b(10)++, b(10)-196, b(11), b(11)-98, b(11)-196++, b(11)-98++, b(11)++, b(11)-196, b(12)++, b(12)-98, b(13), b(13)-98++, b(13)++

**Matched y ions:** y(3), y(4), y(5), y(6), y(7), y(8), y(9), y(9)-98, y(9)++, y(10), y(10)-98, y(11), y(11)-98, y(12)-196++, y(12), y(12)-98, y(12)-196, y(12)-98++, y(12)++, y(13), y(13)-98, y(13)-196, y(13)-196++, y(13)++

**Precursor origin neutral loss:** +

## Peptide No.1065

**TASL TSAASIDGSR**

**Confirmed sites:** @S:3,@S:9

**Ambiguous sites:**

**MS/MS Fragmentation of TASL TSAASIDGSR**

Found in **NDRG2\_MOUSE**, Protein NDRG2 OS=Mus musculus GN=NdrG2 PE=1 SV=1

Match to Query 1966: 1523.628504 from(762.821528,2+)

Title: Elution from: 37.940 to 37.940 scan no 3178 cid35.00 polarity:+:MA10

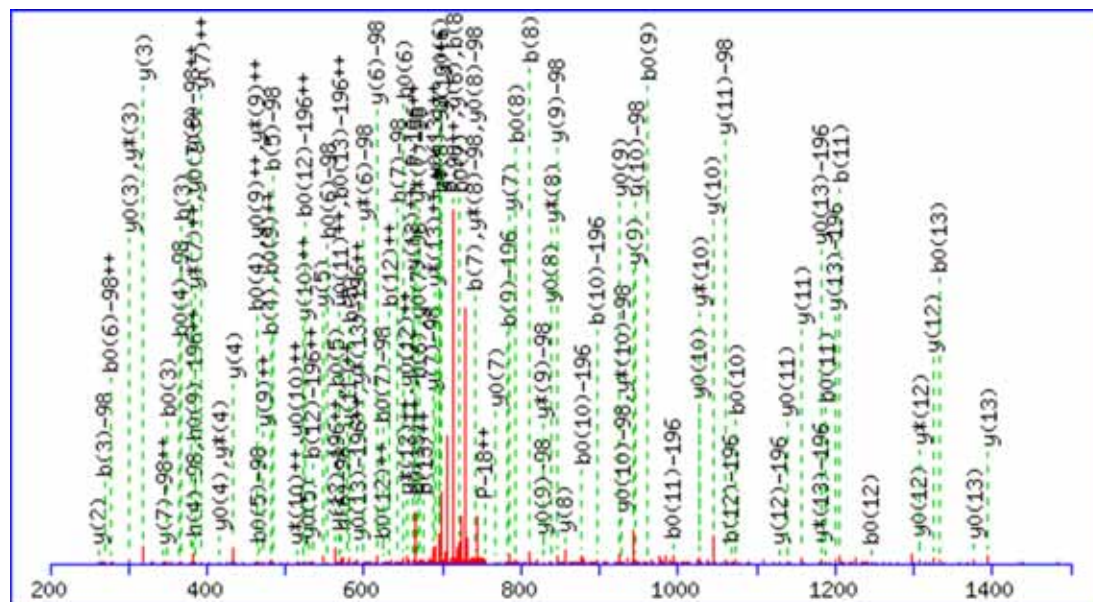

**Monoisotopic mass of neutral peptide Mr(calc):** 1523.6270

**Fixed modifications:** Carbamidomethyl (C) (apply to specified residues or termini only)

**Variable modifications:**

**N-term :** Dimethyl (N-term)

**S3 :** Phospho (ST), with neutral losses 0.0000(shown in table), 97.9769

**S9 :** Phospho (ST), with neutral losses 0.0000(shown in table), 97.9769

**Ions Score:** 95 **Expect:** 6.8e-009

**Matched b ions:** b(3), b(3)-98, b(4)-98, b(4), b(5), b(5)-98, b(6)-98, b(6), b(7)-98, b(7), b(8)-98, b(8), b(9)-98, b(9)-196, b(10)-98, b(10)-196, b(11), b(11)-98, b(12)-196, b(12)-196++, b(12)++, b(13)-98++, b(13)++, b(13)-98

**Matched y ions:** y(2), y(3), y(4), y(5), y(6), y(6)-98, y(7), y(7)++, y(7)-98++, y(7)-98, y(8), y(8)-98++, y(9), y(9)-98, y(9)++, y(10), y(10)++, y(10)-98, y(11), y(11)++, y(11)-98, y(12)-196++, y(12)-98, y(12), y(12)-196, y(12)-98++, y(12)++, y(13)-98, y(13), y(13)-196, y(13)-98++, y(13)++

**Precursor origin neutral loss:** +

## Peptide No.1066

**TASLTSAASIDGSR**

**Confirmed sites:** @S:3,@T:5,@S:6

**Ambiguous sites:**

MS/MS Fragmentation of **TASLTSAASIDGSR**

Found in **NDRG2\_MOUSE**, Protein NDRG2 OS=Mus musculus GN=Ndr2 PE=1 SV=1

Match to Query 2056: 1603.594446 from(802.804499,2+)

Title: Elution from: 40.665 to 40.665 scan no 3451 cid35.00 polarity:+:MA10

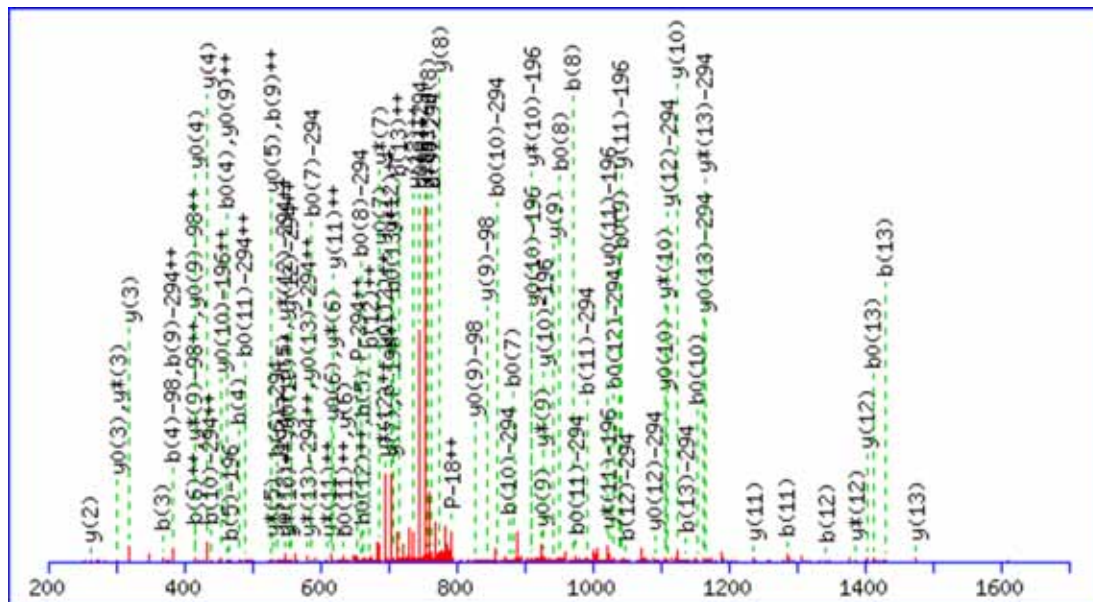

**Monoisotopic mass of neutral peptide Mr(calc):** 1603.5933

**Fixed modifications:** Carbamidomethyl (C) (apply to specified residues or termini only)

**Variable modifications:**

**N-term :** Dimethyl (N-term)

**S3 :** Phospho (ST), with neutral losses 0.0000(shown in table), 97.9769

**T5 :** Phospho (ST), with neutral losses 0.0000(shown in table), 97.9769

**S6 :** Phospho (ST), with neutral losses 0.0000(shown in table), 97.9769

**Ions Score:** 34 **Expect:** 0.0042

**Matched b ions:** b(3), b(4)-98, b(4), b(5)-98, b(5)-196, b(5), b(6)-196, b(6)-98, b(6)++, b(6)-294, b(7)-196, b(8)-98, b(8)-196, b(8), b(9)-294++, b(9)++, b(9)-98, b(9)-98++, b(9)-294, b(10)-98, b(10)-294++, b(10)-196, b(10)-196++, b(10)-294, b(11)-98, b(11), b(11)-196, b(11)-196++, b(11)-294, b(12), b(12)++, b(12)-294, b(13)-98, b(13), b(13)-98++, b(13)++, b(13)-294

**Matched y ions:** y(2), y(3), y(4), y(5), y(6), y(7), y(8), y(9)-98, y(9), y(10), y(10)-196, y(10)-98, y(11), y(11)++, y(11)-196, y(11)-98, y(12), y(12)-98, y(12)-294++, y(12)-98++, y(12)++, y(12)-294, y(13), y(13)-98, y(13)-196, y(13)-196++, y(13)-98++, y(13)++

**Precursor origin neutral loss:** +

## Peptide No.1067

**TASLTSAASIDGSR**

**Confirmed sites:** @S:6,@S:9

**Ambiguous sites:**

**MS/MS Fragmentation of TASLTSAASIDGSR**

Found in **NDRG2\_MOUSE**, Protein NDRG2 OS=Mus musculus GN=Ndr2 PE=1 SV=1

Match to Query 2642: 1523.627214 from(762.820883,2+)

Title: Elution from: 40.013 to 40.013 scan no 3667 cid35.00 polarity:+:MA10



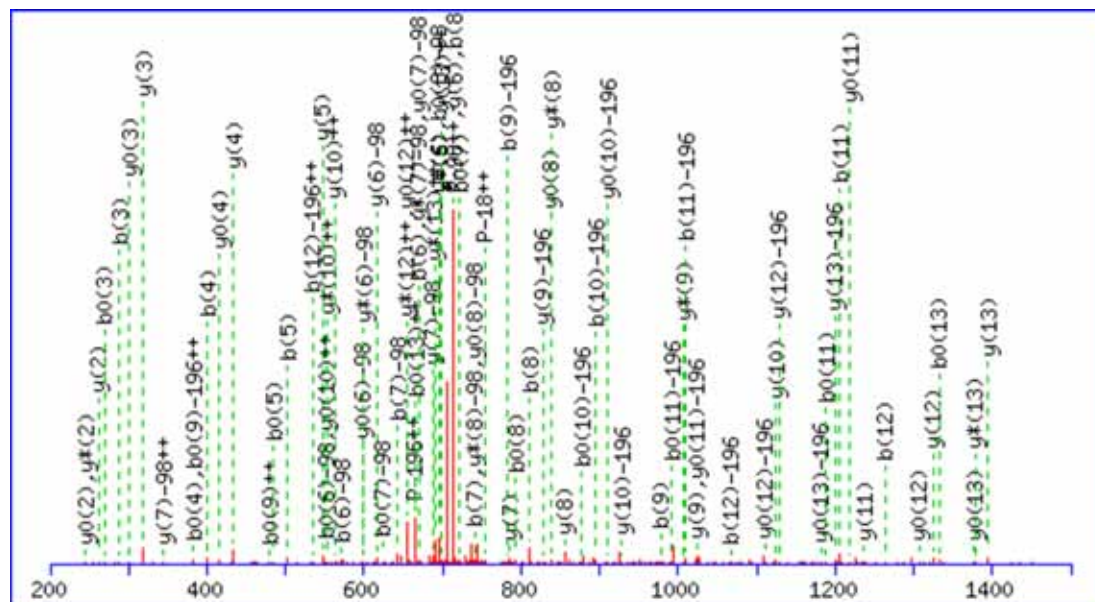

**Monoisotopic mass of neutral peptide Mr(calc):** 1523.6270

**Fixed modifications:** Carbamidomethyl (C) (apply to specified residues or termini only)

**Variable modifications:**

**N-term :** Dimethyl (N-term)

**S6 :** Phospho (ST), with neutral losses 0.0000(shown in table), 97.9769

**S9 :** Phospho (ST), with neutral losses 0.0000(shown in table), 97.9769

**Ions Score:** 83 **Expect:** 9.5e-008

**Matched b ions:** b(3), b(4), b(5), b(6)-98, b(6), b(7)-98, b(7), b(8)-98, b(8), b(9)-98, b(9)-196, b(9), b(10)-98, b(10)-196, b(11)-98, b(11), b(11)-196, b(12), b(12)-196++, b(12)-196, b(13)-98++

**Matched y ions:** y(2), y(3), y(4), y(5), y(6), y(6)-98, y(7), y(7)-98++, y(7)-98, y(8), y(9)-98, y(9), y(9)-98++, y(9)-196, y(10), y(10)-98, y(10)-98++, y(10)-196, y(10)++, y(11), y(11)-98++, y(11)-98, y(12)-98, y(12), y(12)-196, y(12)-98++, y(13)-98, y(13), y(13)-196, y(13)++

**Precursor origin neutral loss:** +

## Peptide No.1068

**TASLTSAASIDGSR**

**Confirmed sites:** @S:9

**Ambiguous sites:**

**MS/MS Fragmentation of TASLTSAASIDGSR**

Found in **NDRG2\_MOUSE**, Protein NDRG2 OS=Mus musculus GN=NdrG2 PE=1 SV=1

Match to Query 2973: 1443.661278 from(722.837915,2+)

Title: Elution from: 35.312 to 35.312 scan no 2967 cid35.00 polarity:+:MA10

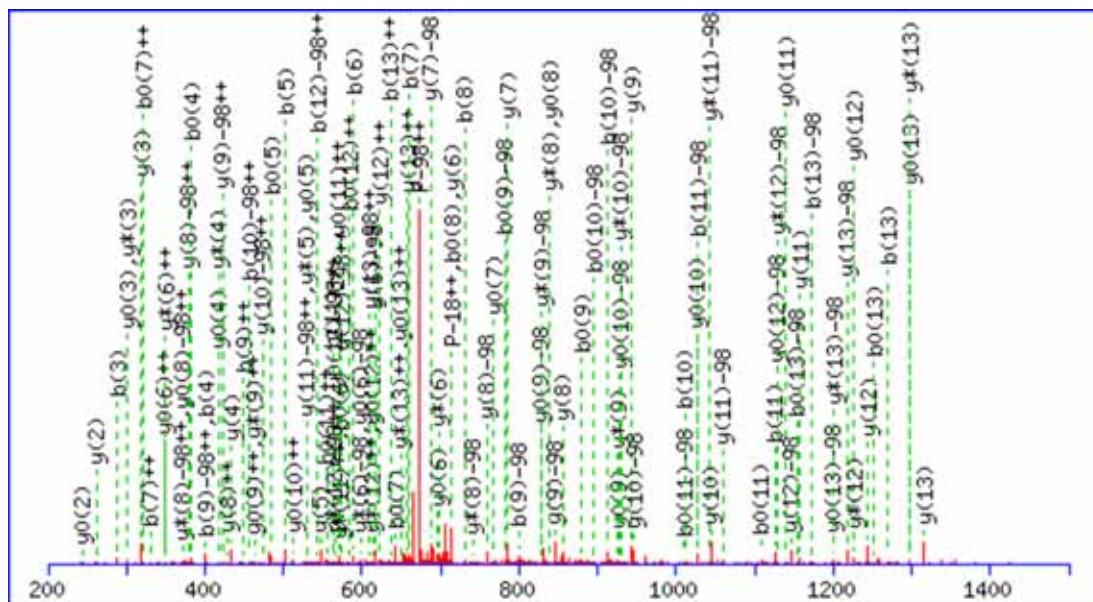

**Monoisotopic mass of neutral peptide Mr(calc):** 1443.6606

**Fixed modifications:** Carbamidomethyl (C) (apply to specified residues or termini only)

**Variable modifications:**

**N-term :** Dimethyl (N-term)

**S9 :** Phospho (ST), with neutral losses 97.9769(shown in table), 0.0000

**Ions Score:** 86 **Expect:** 7.7e-008

**Matched b ions:** b(3), b(4), b(5), b(6), b(7)++, b(7), b(8), b(9)-98++, b(9)-98, b(9)++, b(10)-98, b(10)-98++, b(10), b(11), b(11)-98, b(11)++, b(12)-98++, b(13)++, b(13)-98, b(13)

**Matched y ions:** y(2), y(3), y(4), y(5), y(6)-98, y(6), y(7), y(7)-98, y(8), y(8)-98, y(8)++, y(8)-98++, y(9)-98, y(9), y(9)-98++, y(10), y(10)-98, y(10)-98++, y(11)-98, y(11), y(11)-98++, y(12)-98, y(12), y(12)-98++, y(12)++, y(13), y(13)-98, y(13)-98++, y(13)++

**Precursor origin neutral loss:** +

## Peptide No.1069

**TASLTSAASIDGSR**

**Confirmed sites:** @T:1,@S:3

**Ambiguous sites:**

**MS/MS Fragmentation of TASLTSAASIDGSR**

Found in **NDRG2\_MOUSE**, Protein NDRG2 OS=Mus musculus GN=Ndr2 PE=1 SV=1

Match to Query 3365: 1523.627438 from(762.820995,2+)

Title: Elution from: 41.329 to 41.329 scan no 3825 cid35.00 polarity:+MA10

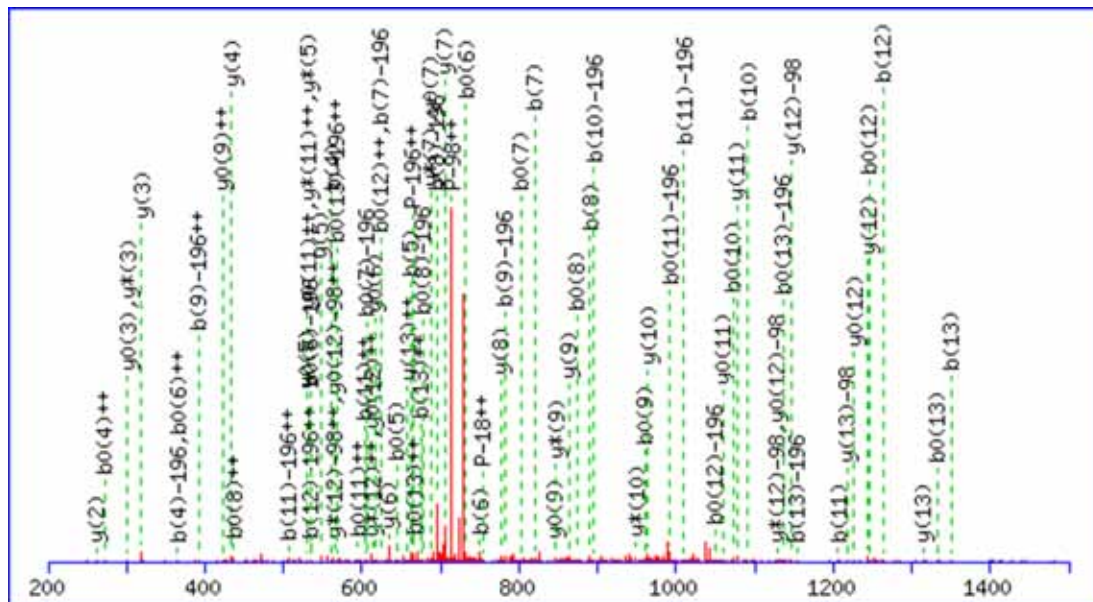

**Monoisotopic mass of neutral peptide Mr(calc):** 1523.6270

**Fixed modifications:** Carbamidomethyl (C) (apply to specified residues or termini only)

**Variable modifications:**

**N-term :** Dimethyl (N-term)

**T1 :** Phospho (ST), with neutral losses 0.0000(shown in table), 97.9769

**S3 :** Phospho (ST), with neutral losses 0.0000(shown in table), 97.9769

**Ions Score:** 33 **Expect:** 0.009

**Matched b ions:** b(3)-98, b(4)-196, b(4)-98, b(4), b(5)-98, b(5), b(6), b(6)-98, b(7)-196, b(7)-98, b(7), b(8)-98, b(8), b(8)-196, b(9)-196++, b(9)-196, b(9)-98, b(10)-196, b(10)-98, b(10), b(11), b(11)-98++, b(11)-196++, b(11)++, b(11)-196, b(11)-98, b(12), b(12)-196++, b(12)-98++, b(13)-98, b(13), b(13)-196, b(13)++

**Matched y ions:** y(2), y(3), y(4), y(5), y(6), y(7), y(8), y(9), y(10), y(11), y(12), y(12)-98, y(13)-98, y(13)++, y(13)

**Precursor origin neutral loss:** +

## Peptide No.1070

**TASL TSAASIDGSR**

**Confirmed sites:** @T:1,@S:9

**Ambiguous sites:**

MS/MS Fragmentation of **TASL TSAASIDGSR**

Found in **NDRG2\_MOUSE**, Protein NDRG2 OS=Mus musculus GN=Ndr2 PE=1 SV=1

Match to Query 2646: 1523.627756 from(762.821154,2+)

Title: Elution from: 41.578 to 41.578 scan no 3874 cid35.00 polarity:+:MA10

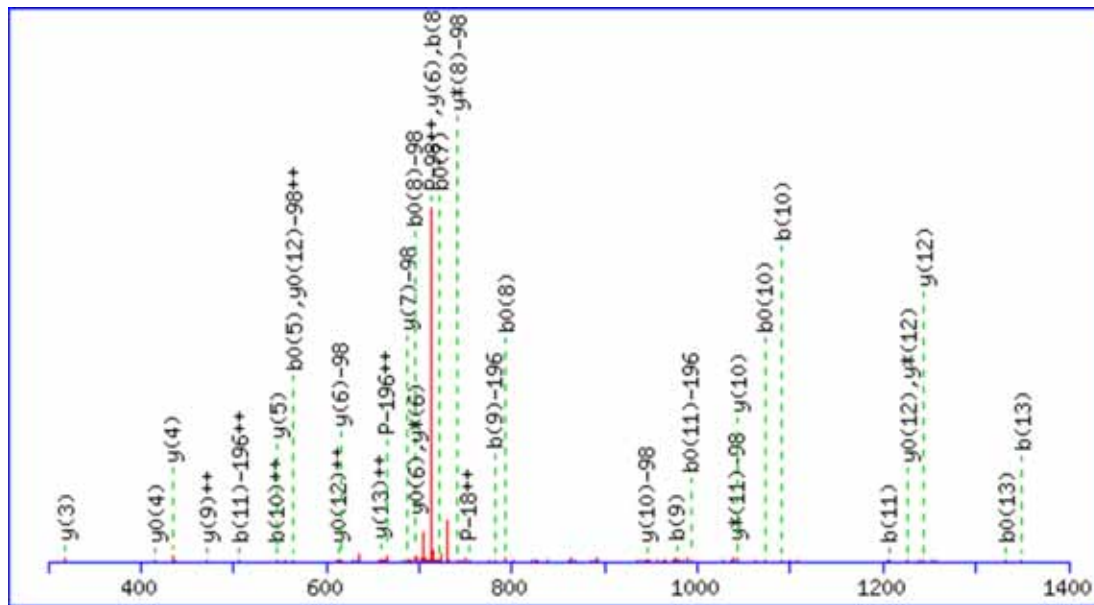

**Monoisotopic mass of neutral peptide Mr(calc):** 1523.6270

**Fixed modifications:** Carbamidomethyl (C) (apply to specified residues or termini only)

**Variable modifications:**

**N-term :** Dimethyl (N-term)

**T1 :** Phospho (ST), with neutral losses 0.0000(shown in table), 97.9769

**S9 :** Phospho (ST), with neutral losses 0.0000(shown in table), 97.9769

**Ions Score:** 33 **Expect:** 0.011

**Matched b ions:** b(8)-98, b(9)-196, b(9), b(10)-98, b(10), b(10)++, b(11), b(11)-98, b(11)-196++, b(11)-98++, b(13), b(13)-98

**Matched y ions:** y(3), y(4), y(5), y(6), y(6)-98, y(7)-98, y(9)++, y(10), y(10)-98, y(12), y(13)++

**Precursor origin neutral loss:** +

## Peptide No.1071

**TASL TSAASIDGSR**

**Confirmed sites:** @T:5,@S:6

**Ambiguous sites:**

**MS/MS Fragmentation of TASL TSAASIDGSR**

Found in **NDRG2\_MOUSE**, Protein NDRG2 OS=Mus musculus GN=NdrG2 PE=1 SV=1

Match to Query 2645: 1523.627698 from(762.821125,2+)

Title: Elution from: 41.263 to 41.263 scan no 3832 cid35.00 polarity:+:MA10



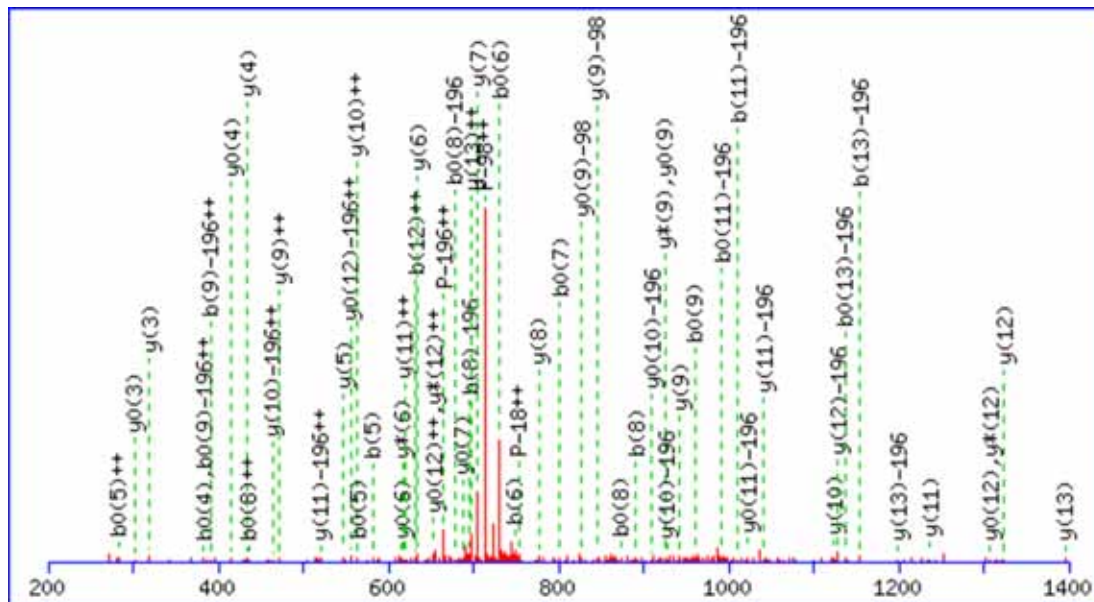

**Monoisotopic mass of neutral peptide Mr(calc):** 1523.6270

**Fixed modifications:** Carbamidomethyl (C) (apply to specified residues or termini only)

**Variable modifications:**

**N-term :** Dimethyl (N-term)

**T5 :** Phospho (ST), with neutral losses 0.0000(shown in table), 97.9769

**S6 :** Phospho (ST), with neutral losses 0.0000(shown in table), 97.9769

**Ions Score:** 32 **Expect:** 0.012

**Matched b ions:** b(5), b(6)-98, b(6), b(7)-98, b(8)-98, b(8)-196, b(8), b(9)-98, b(9)-196++, b(10)-98, b(11)-98++, b(11)-98, b(11)-196, b(12)++, b(13)-98, b(13)-196, b(13)-98++

**Matched y ions:** y(3), y(4), y(5), y(6), y(7), y(8), y(9)++, y(9), y(9)-98, y(10)-98++, y(10), y(10)-196++, y(10)++, y(10)-196, y(11)-196++, y(11), y(11)++, y(11)-196, y(12)-196, y(12), y(12)-98, y(12)-98++, y(13), y(13)-196, y(13)++

**Precursor origin neutral loss:** +

## Peptide No.1072

**TASL TSAASIDGSR**

**Confirmed sites:** @T:5,@S:6,@S:9

**Ambiguous sites:**

**MS/MS Fragmentation of TASL TSAASIDGSR**

Found in **NDRG2\_MOUSE**, Protein NDRG2 OS=Mus musculus GN=Ndrg2 PE=1 SV=1

Match to Query 2681: 1603.593660 from(802.804106,2+)

Title: Elution from: 40.828 to 40.828 scan no 3616 cid35.00 polarity:+:MA10

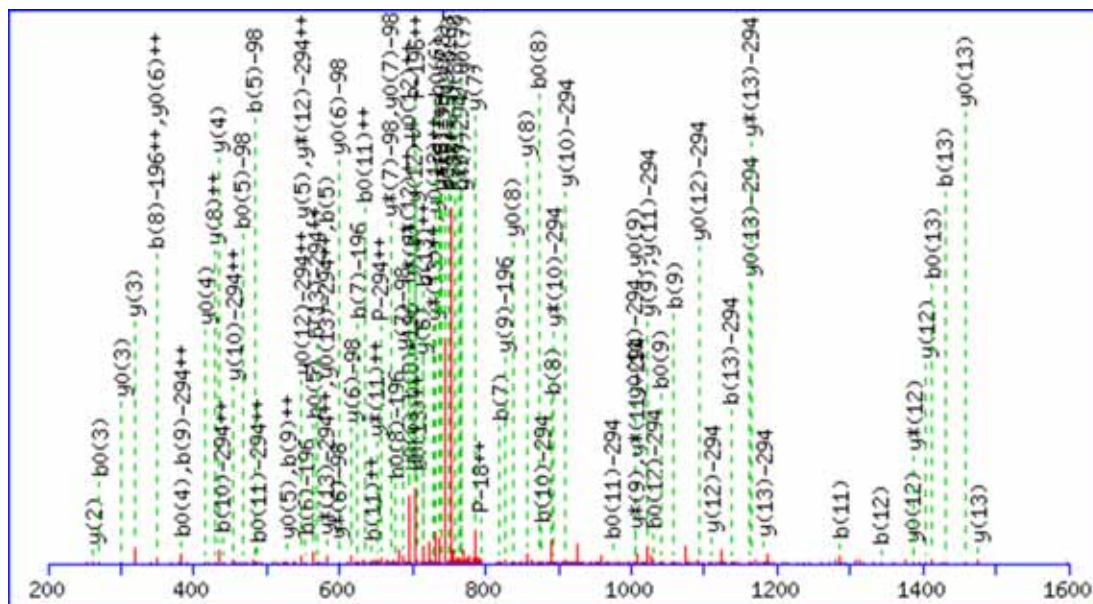

**Monoisotopic mass of neutral peptide Mr(calc): 1603.5933**

**Fixed modifications:** Carbamidomethyl (C) (apply to specified residues or termini only)

**Variable modifications:**

**N-term :** Dimethyl (N-term)

**T5 :** Phospho (ST), with neutral losses 0.0000(shown in table), 97.9769

**S6 :** Phospho (ST), with neutral losses 0.0000(shown in table), 97.9769

**S9 :** Phospho (ST), with neutral losses 0.0000(shown in table), 97.9769

**Ions Score: 36 Expect: 0.0025**

**Matched b ions:** b(5), b(5)-98, b(6)-98, b(6)-196, b(6), b(7)-98, b(7)-196, b(7), b(8), b(8)-196++, b(8)-196, b(8)-98, b(9)-294++, b(9)-98++, b(9)-98, b(9)-196, b(9)++, b(9)-294, b(9), b(10)-98, b(10)-294++, b(10)-196++, b(10)-196, b(10)-98++, b(10)-294, b(11)-98, b(11), b(11)-196, b(11)-196++, b(11)++, b(12)-98, b(12), b(12)-98++, b(12)-196, b(13), b(13)-294++, b(13)++, b(13)-294, b(13)-98

**Matched y ions:** y(2), y(3), y(4), y(5), y(6)-98, y(6), y(7), y(7)-98, y(8), y(8)++, y(8)-98, y(9), y(9)-98, y(9)-196, y(10)-294++, y(10)-196, y(10)-294, y(10)-98, y(10)-98++, y(11)-294, y(11)-196, y(12)-98, y(12), y(12)-196, y(12)-98++, y(12)++, y(12)-294, y(13), y(13)-98, y(13)-196, y(13)-196++, y(13)-98++, y(13)++, y(13)-294

**Precursor origin neutral loss: +**

## Peptide No.1073

**TASLTSAASIDGSR**

**Confirmed sites: @T:5,@S:9**

**Ambiguous sites:**

**MS/MS Fragmentation of TASLTSAASIDGSR**

Found in **NDRG2\_MOUSE**, Protein NDRG2 OS=Mus musculus GN=Ndr2 PE=1 SV=1

Match to Query 1965: 1523.628340 from(762.821446,2+)

Title: Elution from: 39.753 to 39.753 scan no 3421 cid35.00 polarity:+:MA10

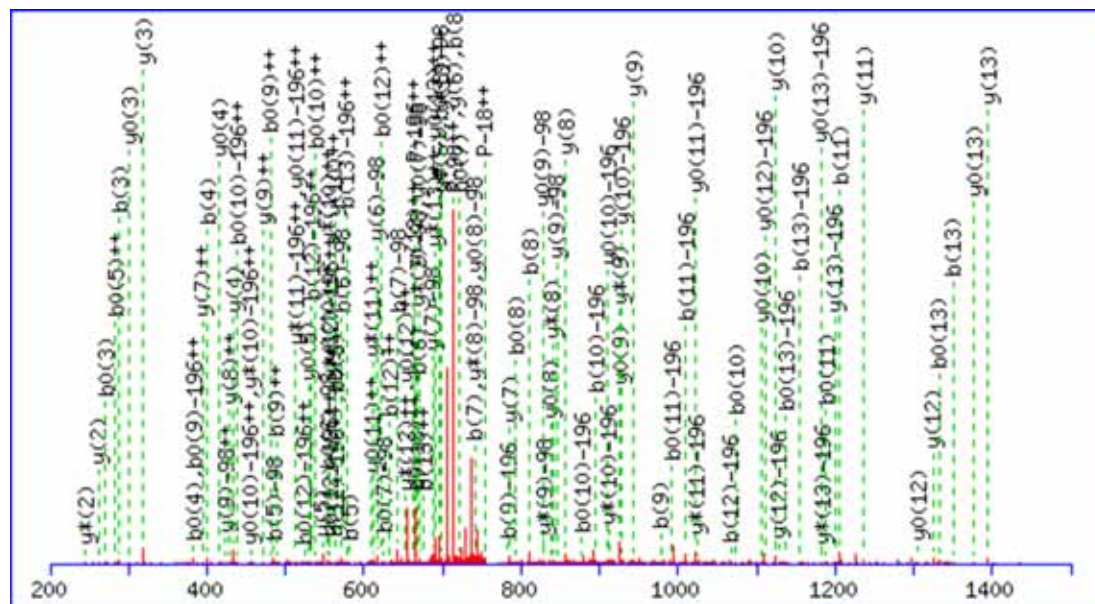

**Monoisotopic mass of neutral peptide Mr(calc):** 1523.6270

**Fixed modifications:** Carbamidomethyl (C) (apply to specified residues or termini only)

**Variable modifications:**

**N-term :** Dimethyl (N-term)

**T5 :** Phospho (ST), with neutral losses 0.0000(shown in table), 97.9769

**S9 :** Phospho (ST), with neutral losses 0.0000(shown in table), 97.9769

**Ions Score:** 73 **Expect:** 1.1e-006

**Matched b ions:** b(3), b(4), b(5)-98, b(5), b(6)-98, b(6), b(7)-98, b(7), b(8)-98, b(8), b(9)-98, b(9)++, b(9)-196, b(9), b(10)-98, b(10)-196, b(11)-98, b(11), b(11)-98++, b(11)-196, b(12)-196++, b(12)++, b(12)-196, b(12)-98, b(13), b(13)-196, b(13)-98, b(13)-196++, b(13)-98++, b(13)++

**Matched y ions:** y(2), y(3), y(4), y(5), y(6), y(6)-98, y(7), y(7)++, y(7)-98, y(8), y(8)++, y(9)++, y(9), y(9)-98++, y(9)-98, y(10), y(10)-98, y(10)++, y(10)-196, y(11), y(11)-98, y(12)-98, y(12), y(12)-196, y(12)-196++, y(12)-98++, y(12)++, y(13)-98, y(13), y(13)-98++, y(13)++, y(13)-196

**Precursor origin neutral loss:** +

## Peptide No.1074

**TASL TSAASIDGSR**

**Confirmed sites: @S:3**

**Ambiguous sites:**

MS/MS Fragmentation of **TASL TSAASIDGSR**

Found in **NDRG2\_MOUSE**, Protein NDRG2 OS=Mus musculus GN=NdrG2 PE=1 SV=1

Match to Query 2993: 1449.692724 from(725.853638,2+)

Title: Elution from: 37.210 to 37.210 scan no 3244 cid35.00 polarity:+:MA10

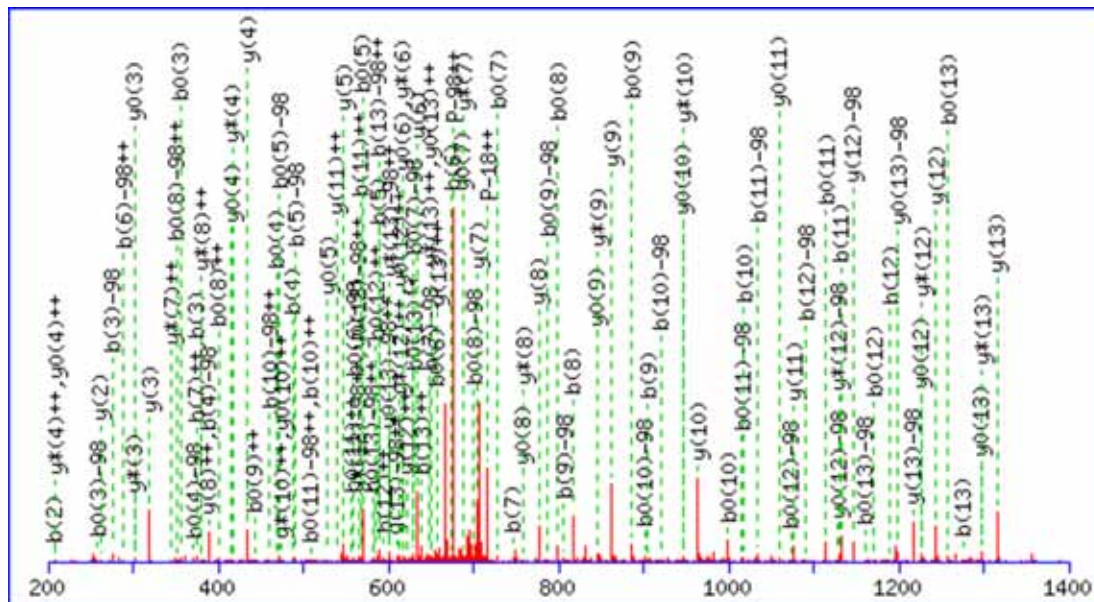

**Monoisotopic mass of neutral peptide Mr(calc):** 1449.6924

**Fixed modifications:** Carbamidomethyl (C) (apply to specified residues or termini only)

**Variable modifications:**

**N-term :** Dimethyl:2H(4)13C(2) (N-term)

**S3 :** Phospho (ST), with neutral losses 97.9769(shown in table), 0.0000

**Ions Score:** 79 **Expect:** 4.8e-007

**Matched b ions:** b(2), b(3)-98, b(3), b(4)-98, b(4), b(5)-98, b(5), b(6)-98++, b(6), b(7)++, b(7)-98, b(7), b(8), b(9)-98, b(9), b(10), b(10)-98++, b(10)++, b(10)-98, b(11), b(11)-98, b(11)++, b(12), b(12)++, b(12)-98, b(13)-98++, b(13)++, b(13)

**Matched y ions:** y(2), y(3), y(4), y(5), y(6), y(7), y(8)++, y(8), y(9), y(10), y(11), y(11)++, y(12)-98, y(12), y(12)++, y(13)-98, y(13), y(13)-98++, y(13)++

**Precursor origin neutral loss:** +

## Peptide No.1075

**TASLTSAASIDGSR**

**Confirmed sites:** @S:3,@S:6

**Ambiguous sites:**

**MS/MS Fragmentation of TASLTSAASIDGSR**

Found in **NDRG2\_MOUSE**, Protein NDRG2 OS=Mus musculus GN=NdrG2 PE=1 SV=1

Match to Query 2321: 1529.658974 from(765.836763,2+)

Title: Elution from: 40.410 to 40.410 scan no 3531 cid35.00 polarity:+:MA10



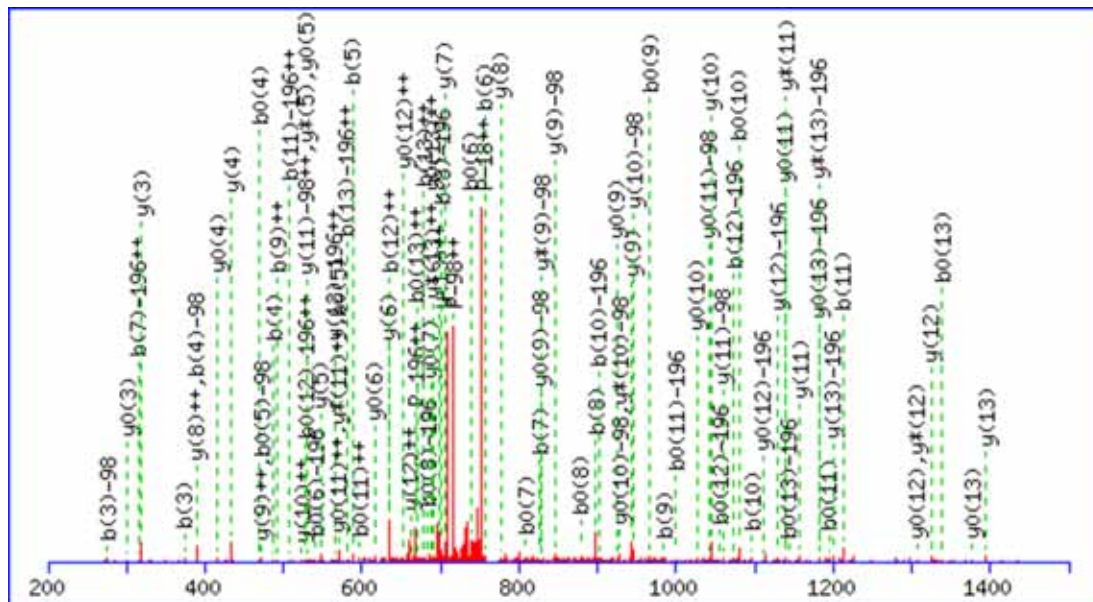

**Monoisotopic mass of neutral peptide Mr(calc):** 1529.6588

**Fixed modifications:** Carbamidomethyl (C) (apply to specified residues or termini only)

**Variable modifications:**

**N-term :** Dimethyl:2H(4)13C(2) (N-term)

**S3 :** Phospho (ST), with neutral losses 0.0000(shown in table), 97.9769

**S6 :** Phospho (ST), with neutral losses 0.0000(shown in table), 97.9769

**Ions Score:** 44 **Expect:** 0.0011

**Matched b ions:** b(3)-98, b(3), b(4)-98, b(4), b(5), b(6)-98, b(6), b(7)-196++, b(7)-98, b(7), b(8)-98, b(8), b(8)-196, b(9)++, b(9)-98, b(9), b(10), b(10)-196, b(10)-98, b(11), b(11)-98, b(11)-196++, b(12)-196, b(12)++, b(12)-98, b(13)-98++, b(13)-196++, b(13)++

**Matched y ions:** y(3), y(4), y(5), y(6), y(7), y(8)++, y(8), y(9)-98, y(9), y(9)++, y(10), y(10)-98, y(10)++, y(11), y(11)-98++, y(11)-98, y(12), y(12)-98, y(12)-196, y(12)-196++, y(12)-98++, y(12)++, y(13), y(13)-196, y(13)-98, y(13)++, y(13)-98++

**Precursor origin neutral loss:** +

## Peptide No.1076

**TASL TSAASIDGSR**

**Confirmed sites:** @S:3,@S:9

**Ambiguous sites:**

MS/MS Fragmentation of **TASL TSAASIDGSR**

Found in **NDRG2\_MOUSE**, Protein NDRG2 OS=Mus musculus GN=Ndr g2 PE=1 SV=1

Match to Query 1803: 1529.660082 from(765.837317,2+)

Title: Elution from: 37.906 to 37.906 scan no 3077 cid35.00 polarity:+:MA10

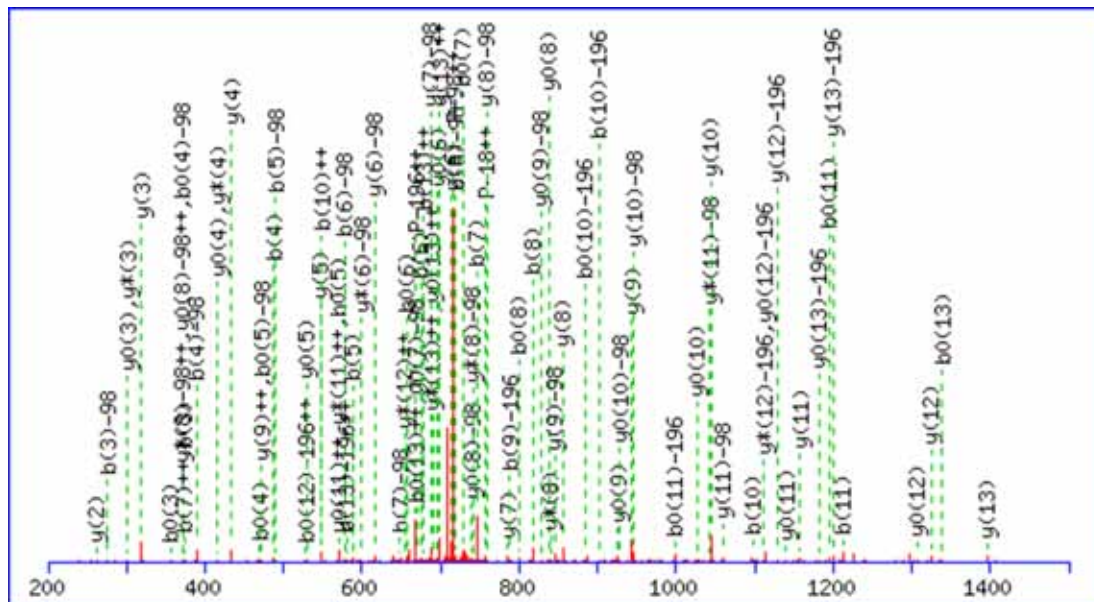

**Monoisotopic mass of neutral peptide Mr(calc): 1529.6588**

**Fixed modifications:** Carbamidomethyl (C) (apply to specified residues or termini only)

**Variable modifications:**

**N-term :** Dimethyl:2H(4)13C(2) (N-term)

**S3 :** Phospho (ST), with neutral losses 0.0000(shown in table), 97.9769

**S9 :** Phospho (ST), with neutral losses 0.0000(shown in table), 97.9769

**Ions Score:** 76 **Expect:** 7.2e-007

**Matched b ions:** b(3)-98, b(3), b(4), b(4)-98, b(5)-98, b(5), b(6)-98, b(6), b(7)++, b(7), b(7)-98, b(8), b(8)-98, b(9)-98, b(9)-196, b(10)-98, b(10)-196, b(10)++, b(10), b(11), b(11)-98, b(13)-196++, b(13)++

**Matched y ions:** y(2), y(3), y(4), y(5), y(6)-98, y(6), y(7), y(7)-98, y(8), y(8)-98, y(9), y(9)-98, y(9)++, y(10), y(10)-98, y(11)-98, y(11), y(12)-98, y(12), y(12)-98++, y(12)-196, y(13)-98, y(13), y(13)-196, y(13)++, y(13)-98++

**Precursor origin neutral loss:** +

## Peptide No.1077

**TASLTSAASIDGSR**

**Confirmed sites:** @S:6,@S:9

**Ambiguous sites:**

**MS/MS Fragmentation of TASLTSAASIDGSR**

Found in **NDRG2\_MOUSE**, Protein NDRG2 OS=Mus musculus GN=NdrG2 PE=1 SV=1

Match to Query 2115: 1529.659342 from(765.836947,2+)

Title: Elution from: 39.619 to 39.619 scan no 3367 cid35.00 polarity:+:MA10



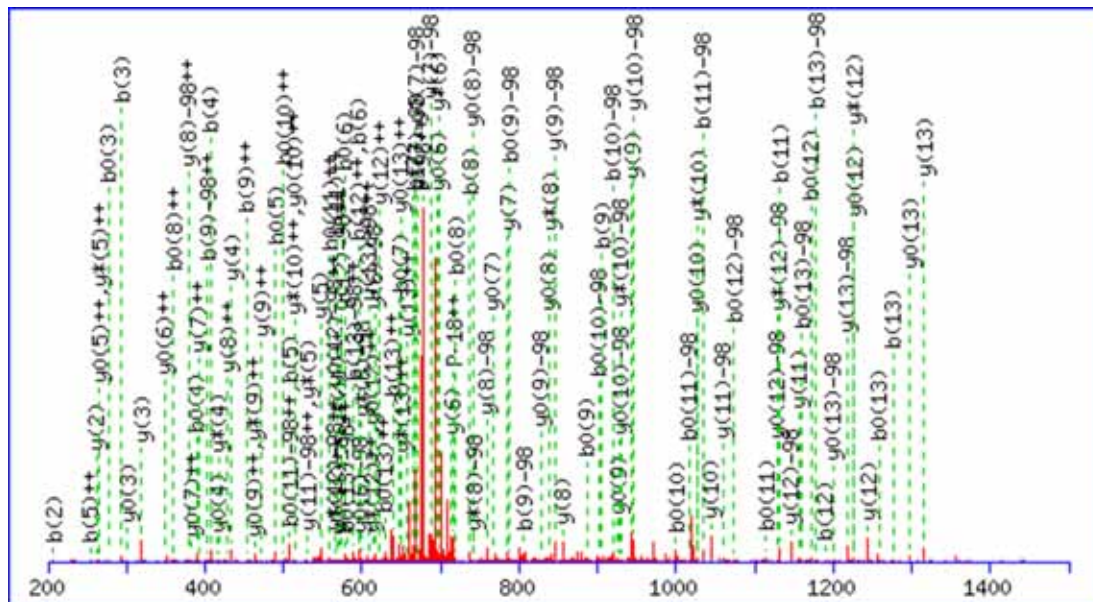

**Monoisotopic mass of neutral peptide Mr(calc):** 1449.6924

**Fixed modifications:** Carbamidomethyl (C) (apply to specified residues or termini only)

**Variable modifications:**

**N-term :** Dimethyl:2H(4)13C(2) (N-term)

**S9 :** Phospho (ST), with neutral losses 0.0000(shown in table), 97.9769

**Ions Score:** 70 **Expect:** 3.6e-006

**Matched b ions:** b(2), b(3), b(4), b(5), b(5)++, b(6), b(7), b(8), b(9)-98, b(9)-98++, b(9)++, b(9), b(10)-98, b(11), b(11)-98, b(11)++, b(12)++, b(12), b(13)-98++, b(13), b(13)++, b(13)-98

**Matched y ions:** y(2), y(3), y(4), y(5), y(6), y(6)-98, y(7), y(7)++, y(7)-98, y(8), y(8)-98, y(8)-98, y(8)++, y(9)-98, y(9), y(9)++, y(10)-98, y(10), y(11), y(11)-98, y(11)-98, y(12)-98, y(12), y(12)-98, y(12)++, y(13), y(13)-98, y(13)-98, y(13)++, y(13)++

**Precursor origin neutral loss:** +

## Peptide No.1079

**TASLTSAASIDGSR**

**Confirmed sites:** @T:5,@S:6,@S:9

**Ambiguous sites:**

**MS/MS Fragmentation of TASLTSAASIDGSR**

Found in **NDRG2\_MOUSE**, Protein NDRG2 OS=Mus musculus GN=Ndr2 PE=1 SV=1

Match to Query 2674: 1609.626394 from(805.820473,2+)

Title: Elution from: 40.640 to 40.640 scan no 3563 cid35.00 polarity:+:MA10



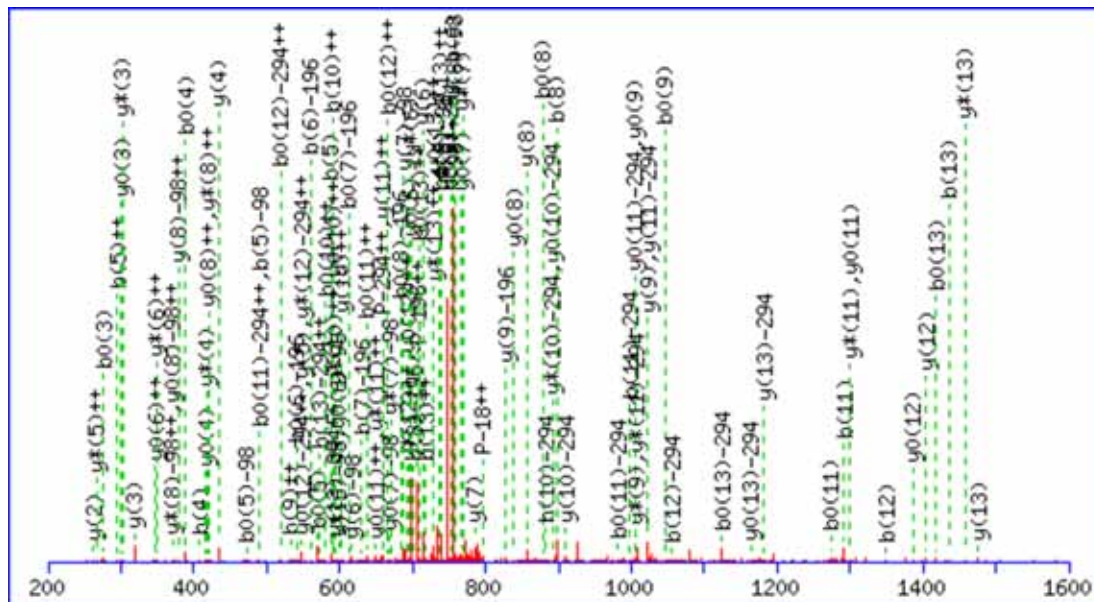

**Monoisotopic mass of neutral peptide Mr(calc):** 1609.6251

**Fixed modifications:** Carbamidomethyl (C) (apply to specified residues or termini only)

**Variable modifications:**

**N-term :** Dimethyl:2H(4)13C(2) (N-term)

**T5 :** Phospho (ST), with neutral losses 0.0000(shown in table), 97.9769

**S6 :** Phospho (ST), with neutral losses 0.0000(shown in table), 97.9769

**S9 :** Phospho (ST), with neutral losses 0.0000(shown in table), 97.9769

**Ions Score:** 42 **Expect:** 0.0011

**Matched b ions:** b(4), b(5), b(5)++, b(5)-98, b(6), b(6)-196, b(6)-98, b(7)-98, b(7)-196, b(8), b(8)-196, b(9)-196++, b(9)-98, b(9)-196, b(9)++, b(10)-98, b(10)-98++, b(10)++, b(10)-294, b(10)-196, b(11)-98, b(11), b(11)-196, b(11)-98++, b(11)-294, b(12), b(12)-196++, b(12)-98++, b(12)-294, b(13), b(13)-294++, b(13)-98++, b(13)++

**Matched y ions:** y(2), y(3), y(4), y(5), y(6)-98, y(6), y(7), y(7)-98, y(8), y(8)-98++, y(8)-98, y(9), y(9)-98, y(9)-196, y(10)-196, y(10)-294, y(10)-98, y(10)++, y(11)-294, y(11)++, y(11)-196, y(11)-98, y(12)-98, y(12), y(12)-196++, y(12)-196, y(12)-98++, y(13), y(13)-98, y(13)-196, y(13)++, y(13)-294, y(13)-98++, y(13)-294++, y(13)-196++

**Precursor origin neutral loss:** +

## Peptide No.1080

**TASLTSAASIDGSRSR**

**Confirmed sites:** @S:13,@S:15

**Ambiguous sites:**

MS/MS Fragmentation of **TASLTSAASIDGSRSR**

Found in **NDRG2\_MOUSE**, Protein NDRG2 OS=Mus musculus GN=Ndr2 PE=1 SV=1

Match to Query 4111: 1766.760326 from(884.387439,2+)

Title: Elution from: 34.466 to 34.466 scan no 2915 cid35.00 polarity:+:MA10

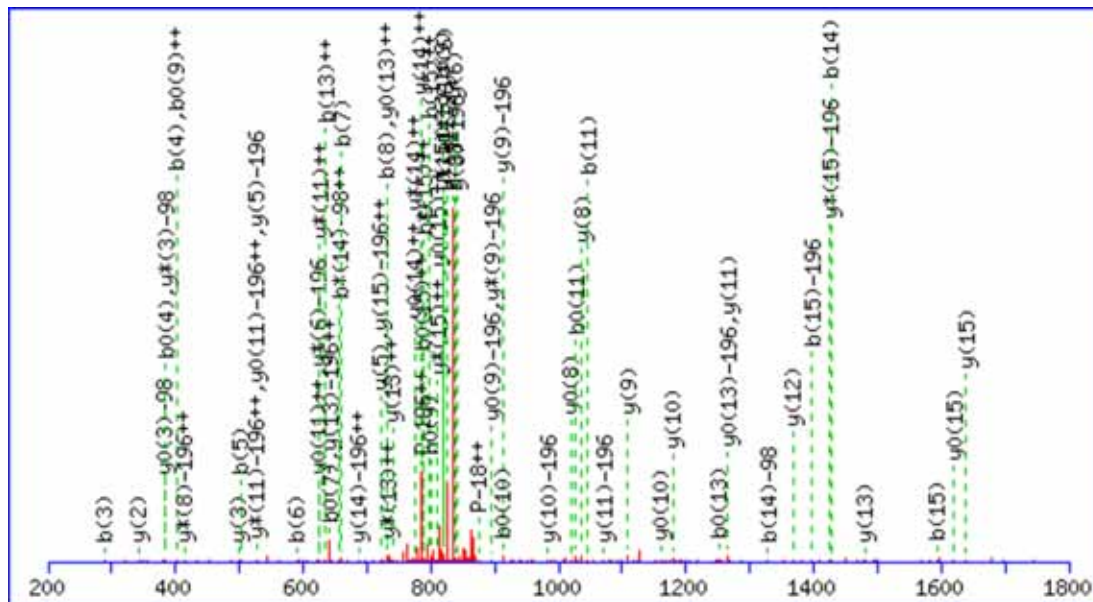

**Monoisotopic mass of neutral peptide Mr(calc):** 1766.7601

**Fixed modifications:** Carbamidomethyl (C) (apply to specified residues or termini only)

**Variable modifications:**

**N-term :** Dimethyl (N-term)

**S13 :** Phospho (ST), with neutral losses 0.0000(shown in table), 97.9769

**S15 :** Phospho (ST), with neutral losses 0.0000(shown in table), 97.9769

**Ions Score:** 29 **Expect:** 0.045

**Matched b ions:** b(3), b(4), b(5), b(6), b(7), b(8), b(9), b(11), b(13)++, b(14), b(14)-98, b(15)-98, b(15)-196, b(15), b(15)++

**Matched y ions:** y(2), y(3), y(5)-98, y(5)-196, y(5), y(6)-98, y(6), y(7)-98, y(8), y(8)-98, y(8)-196, y(9), y(9)-98, y(9)-196, y(10), y(10)-98, y(10)-196, y(11), y(11)-98, y(11)-196, y(12), y(12)-98, y(12)-98++, y(13)-196++, y(13)-98, y(13), y(13)++, y(14)-196++, y(14)-98++, y(14)-98, y(14)++, y(15), y(15)-196++, y(15)-98++, y(15)++

**Precursor origin neutral loss:** +

## Peptide No.1081

**TASL TSAASIDGSR SR**

**Confirmed sites:** @S:6,@S:9,@S:13

**Ambiguous sites:**

MS/MS Fragmentation of **TASL TSAASIDGSR SR**

Found in **NDRG2\_MOUSE**, Protein NDRG2 OS=Mus musculus GN=Ndr g2 PE=1 SV=1

Match to Query 3604: 1846.728664 from(924.371608,2+)

Title: Elution from: 38.490 to 38.490 scan no 3248 cid35.00 polarity:+:MA10:m1s

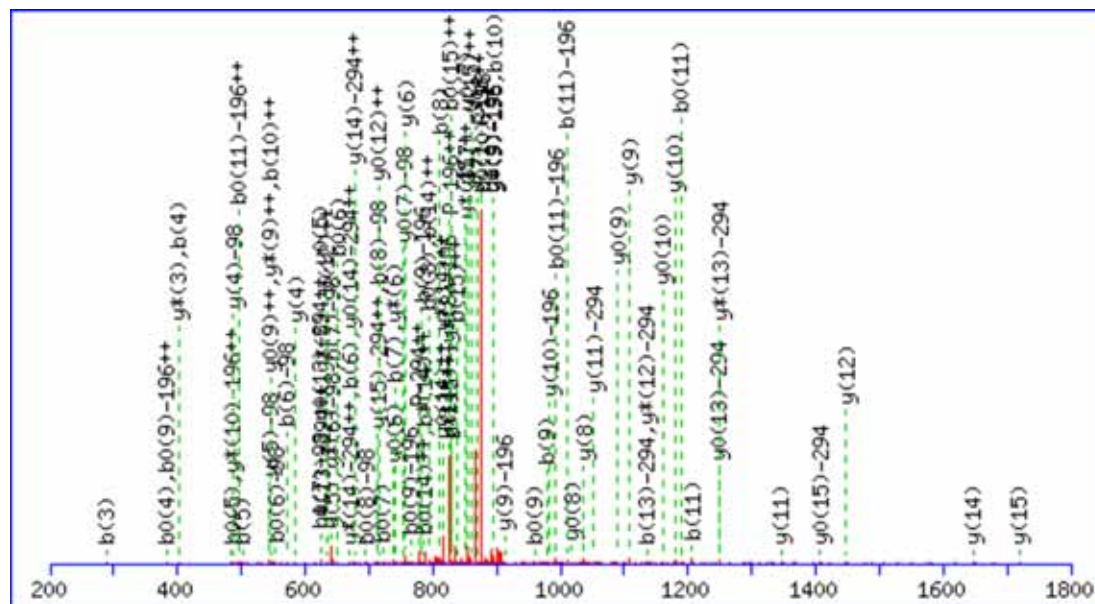

**Monoisotopic mass of neutral peptide Mr(calc):** 1846.7264

**Fixed modifications:** Carbamidomethyl (C) (apply to specified residues or termini only)

**Variable modifications:**

**N-term :** Dimethyl (N-term)

**S6 :** Phospho (ST), with neutral losses 0.0000(shown in table), 97.9769

**S9 :** Phospho (ST), with neutral losses 0.0000(shown in table), 97.9769

**S13 :** Phospho (ST), with neutral losses 0.0000(shown in table), 97.9769

**Ions Score:** 33 **Expect:** 0.011

**Matched b ions:** b(3), b(4), b(5), b(6)-98, b(6), b(7)-98, b(7), b(8)-98, b(8), b(9)-196, b(9)-98, b(9), b(10)-98, b(10)++, b(10)-196, b(11)-98, b(11), b(11)-196, b(12)-98, b(12)++, b(13)-98, b(13)-294, b(14)-98, b(14)-196++, b(14)-98++, b(14)++, b(15)-98, b(15)-196++, b(15)++

**Matched y ions:** y(4)-98, y(4), y(5)-98, y(5), y(6), y(7), y(8), y(8)-98, y(9), y(9)-98, y(9)-196, y(10), y(10)-196, y(10)-98, y(11), y(11)-98++, y(11)-98, y(11)-294, y(11)-196, y(12), y(12)-98, y(13)-196++, y(13)-98++, y(13)-196, y(14), y(14)-98++, y(14)-294++, y(14)-196++, y(14)++, y(15), y(15)-98, y(15)-294++, y(15)-196++, y(15)-98++, y(15)++

**Precursor origin neutral loss:** +

## Peptide No.1082

**TASLTSAASIDGSRSR**

**Confirmed sites:** @S:9,@S:13

**Ambiguous sites:**

**MS/MS Fragmentation of TASLTSAASIDGSRSR**

Found in **NDRG2\_MOUSE**, Protein NDRG2 OS=Mus musculus GN=Ndr2 PE=1 SV=1

Match to Query 4115: 1766.761065 from(589.927631,3+)

Title: Elution from: 34.461 to 34.461 scan no 2914 cid35.00 polarity:+:MA10

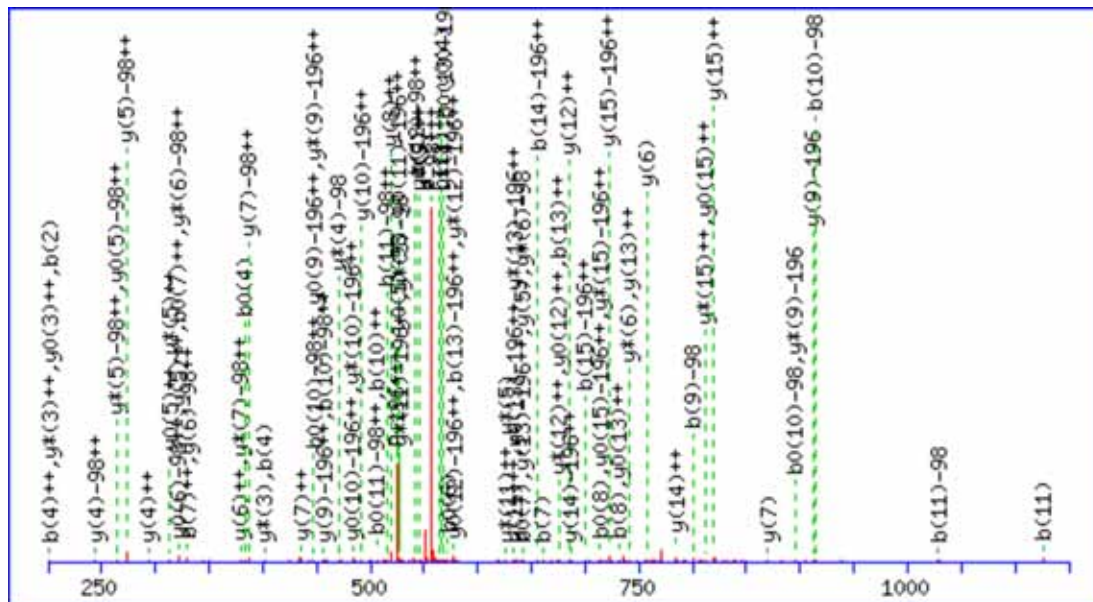

**Monoisotopic mass of neutral peptide Mr(calc):** 1766.7601

**Fixed modifications:** Carbamidomethyl (C) (apply to specified residues or termini only)

**Variable modifications:**

**N-term :** Dimethyl (N-term)

**S9 :** Phospho (ST), with neutral losses 97.9769(shown in table), 0.0000

**S13 :** Phospho (ST), with neutral losses 97.9769(shown in table), 0.0000

**Ions Score:** 31 **Expect:** 0.031

**Matched b ions:** b(2), b(4)++, b(4), b(7)++, b(7), b(8), b(9)-98, b(10)-98, b(10)-98++, b(10)++, b(11)-98, b(11), b(11)-98++, b(11)++, b(12)-98++, b(13)-196++, b(13)++, b(14)-196++, b(14)-98++, b(15)-98++, b(15)-196++

**Matched y ions:** y(4)-98++, y(4)++, y(5)-98++, y(5)++, y(5), y(6)-98++, y(6)++, y(6), y(7)++, y(7)-98++, y(7), y(8)-98, y(8)++, y(8)-98++, y(9)-196, y(9)-196++, y(9)-98++, y(10)-196++, y(10)-98++, y(11)++, y(12)++, y(12)-98++, y(13)-196++, y(13)++, y(14)-196++, y(14)-98++, y(14)++, y(15)-98++, y(15)++, y(15)-196++

**Precursor origin neutral loss:** +

## Peptide No.1083

**TASLTSAASIDGSRSR**

**Confirmed sites:** @S:9,@S:13

**Ambiguous sites:**

**MS/MS Fragmentation of TASLTSAASIDGSRSR**

Found in **NDRG2\_MOUSE**, Protein NDRG2 OS=Mus musculus GN=NdrG2 PE=1 SV=1

Match to Query 3452: 1772.793564 from(887.404058,2+)

Title: Elution from: 34.349 to 34.349 scan no 2697 cid35.00 polarity:+:MA10



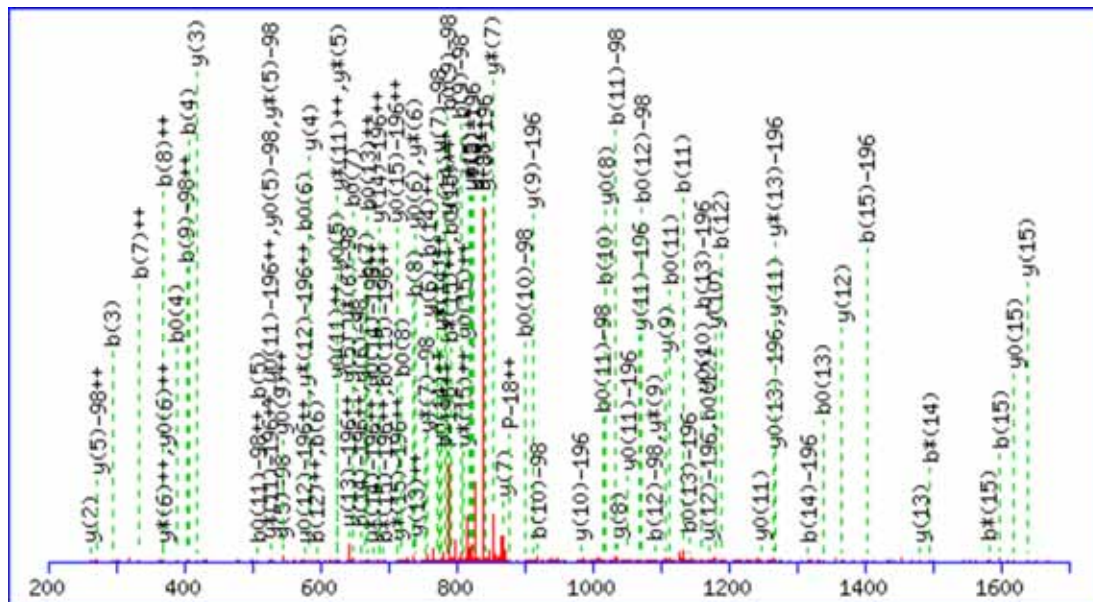

**Monoisotopic mass of neutral peptide Mr(calc):** 1772.7919

**Fixed modifications:** Carbamidomethyl (C) (apply to specified residues or termini only)

**Variable modifications:**

**N-term :** Dimethyl:2H(4)13C(2) (N-term)

**S9 :** Phospho (ST), with neutral losses 0.0000(shown in table), 97.9769

**S13 :** Phospho (ST), with neutral losses 0.0000(shown in table), 97.9769

**Ions Score:** 63 **Expect:** 2e-005

**Matched b ions:** b(3), b(4), b(5), b(6), b(7)++, b(7), b(8), b(8)++, b(9)-98, b(9)-98, b(10)-98, b(10), b(11)-98, b(11), b(12)++, b(12), b(12)-98, b(13)-196, b(13)-98, b(14)++, b(14)-98, b(14)-196, b(14)-196, b(15)-98, b(15), b(15)-196, b(15)-98

**Matched y ions:** y(2), y(3), y(4), y(5)-98, y(5), y(5)-98, y(6), y(6)-98, y(7), y(7)-98, y(8), y(8)-98, y(8)-196, y(9), y(9)-98, y(9)-196, y(10), y(10)-196, y(10)-98, y(11), y(11)-98, y(11)-196, y(12), y(12)-98, y(12)-196, y(13)-196, y(13)-98, y(13)-98, y(13)++, y(14)-98, y(14)-196, y(14)++, y(15), y(15)++, y(15)-98

**Precursor origin neutral loss:** +

## Peptide No.1084

**TASPHFTVSK**

**Confirmed sites:** @S:3

**Ambiguous sites:**

**MS/MS Fragmentation of** **TASPHFTVSK**

Found in **TITIN\_MOUSE**, Titin OS=Mus musculus GN=Ttn PE=1 SV=1

Match to Query 879: 1209.580046 from(605.797299,2+)

Title: Elution from: 28.754 to 28.754 scan no 1945 cid35.00 polarity:+:MA10

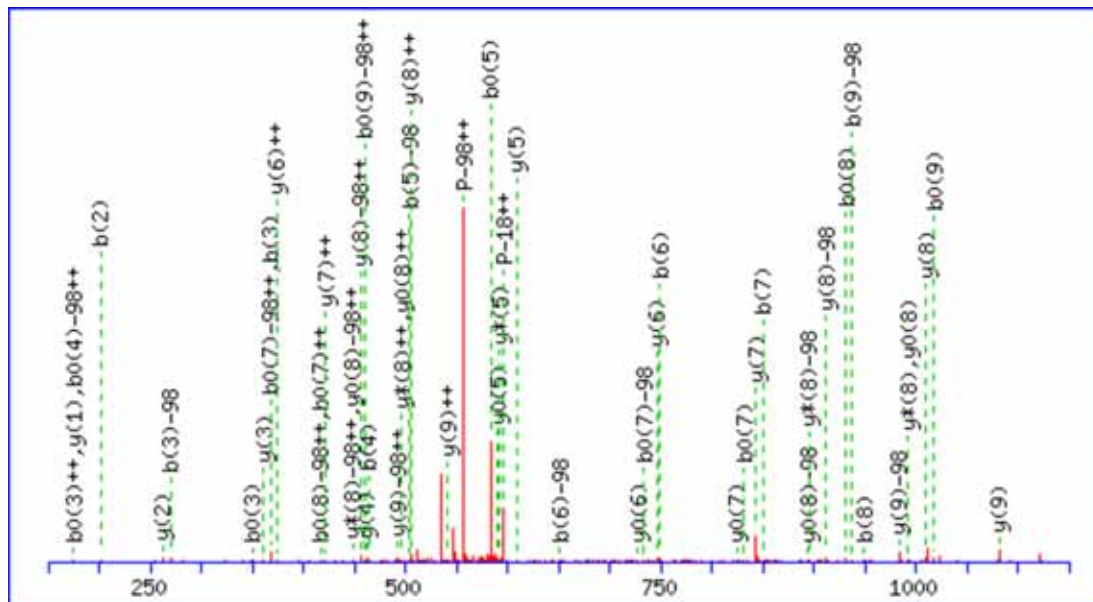

**Monoisotopic mass of neutral peptide Mr(calc):** 1209.5795

**Fixed modifications:** Carbamidomethyl (C) (apply to specified residues or termini only)

**Variable modifications:**

**N-term :** Dimethyl (N-term)

**S3 :** Phospho (ST), with neutral losses 0.0000(shown in table), 97.9769

**K10 :** Dimethyl (K)

**Ions Score:** 45 **Expect:** 0.00085

**Matched b ions:** b(2), b(3)-98, b(3), b(4), b(5)-98, b(6), b(6)-98, b(7), b(8), b(9)-98

**Matched y ions:** y(1), y(2), y(3), y(4), y(5), y(6), y(6)++, y(7), y(7)++, y(8)-98++, y(8)-98, y(8), y(8)++, y(9), y(9)-98, y(9)-98++, y(9)++

**Precursor origin neutral loss:** +

## Peptide No.1085

**TASPHFTVSK**

**Confirmed sites:** @S:3

**Ambiguous sites:**

**MS/MS Fragmentation of** **TASPHFTVSK**

Found in **TITIN\_MOUSE**, Titin OS=Mus musculus GN=Ttn PE=1 SV=1

Match to Query 902: 1221.643386 from(408.221738,3+)

Title: Elution from: 28.718 to 28.718 scan no 1940 cid35.00 polarity:+:MA10

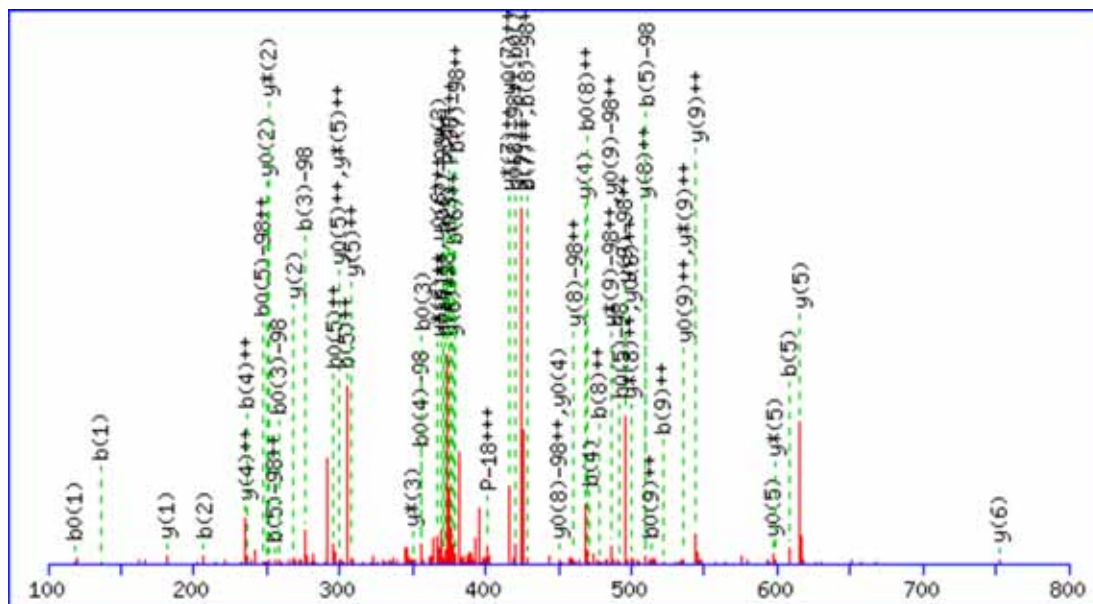

**Monoisotopic mass of neutral peptide Mr(calc):** 1221.6431

**Fixed modifications:** Carbamidomethyl (C) (apply to specified residues or termini only)

**Variable modifications:**

**N-term :** Dimethyl:2H(4)13C(2) (N-term)

**S3 :** Phospho (ST), with neutral losses 0.0000(shown in table), 97.9769

**K10 :** Dimethyl:2H(4)13C(2) (K)

**Ions Score:** 29 **Expect:** 0.046

**Matched b ions:** b(1), b(2), b(3), b(3)-98, b(4)++, b(4)-98, b(4), b(5)++, b(5), b(5)-98++, b(5)-98, b(6)++, b(7)-98++, b(7)++, b(8)-98++, b(8)++, b(9)++

**Matched y ions:** y(1), y(2), y(3), y(4)++, y(4), y(5), y(5)++, y(6), y(6)++, y(7)++, y(8)++, y(8)-98++, y(9)-98++, y(9)++

**Precursor origin neutral loss:** +

## Peptide No.1086

**TDHGAEIVYKSPVVSGDTSPR**

**Confirmed sites:** @S:11,@S:15,@S:19

**Ambiguous sites:**

MS/MS Fragmentation of **TDHGAEIVYKSPVVSGDTSPR**

Found in **TAU\_MOUSE**, Microtubule-associated protein tau OS=Mus musculus GN=Mapt PE=1 SV=3

Match to Query 6740: 2510.056116 from(837.692648,3+)

Title: Elution from: 37.604 to 37.604 scan no 3182 cid35.00 polarity:+:MA10:m1s





Title: Elution from: 37.584 to 37.584 scan no 3111 cid35.00 polarity:+:MA10:m1s

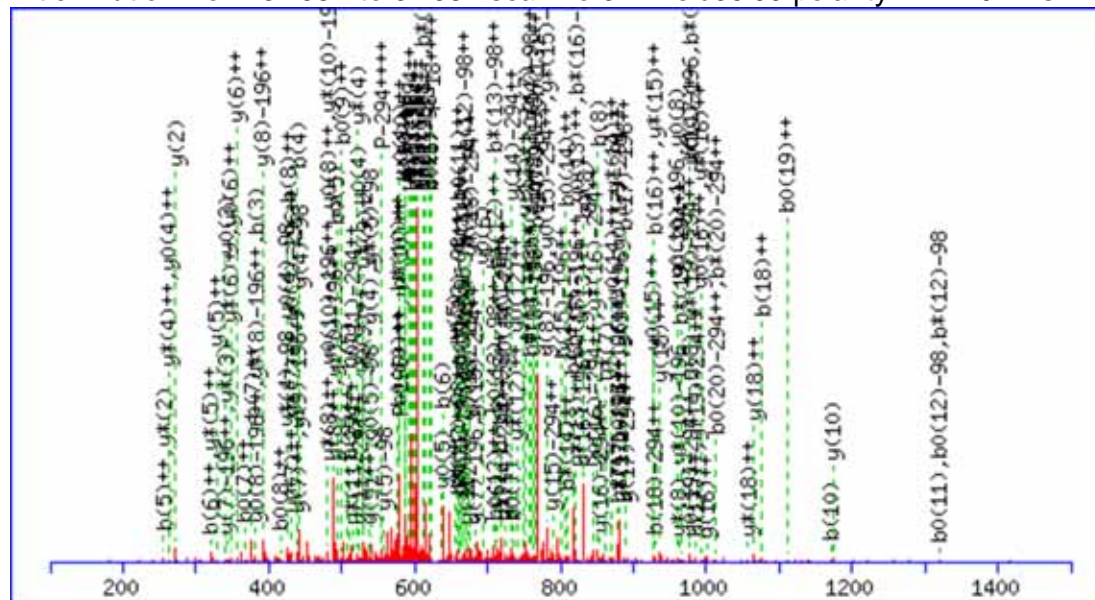

**Monoisotopic mass of neutral peptide Mr(calc):** 2510.0533

**Fixed modifications:** Carbamidomethyl (C) (apply to specified residues or termini only)

**Variable modifications:**

**N-term :** Dimethyl (N-term)

**K10 :** Dimethyl (K)

**S11 :** Phospho (ST), with neutral losses 0.0000(shown in table), 97.9769

**S15 :** Phospho (ST), with neutral losses 0.0000(shown in table), 97.9769

**T18 :** Phospho (ST), with neutral losses 0.0000(shown in table), 97.9769

**Ions Score:** 40 **Expect:** 0.0059

**Matched b ions:** b(3), b(4), b(5)++, b(5), b(6)++, b(6), b(7)++, b(7), b(8)++, b(8), b(9)++, b(10), b(10)++, b(11)-98++, b(11)++, b(12)++, b(12)-98++, b(13)++, b(13)-98++, b(14)-98++, b(14)++, b(15)-196++, b(15)-98++, b(16)-196++, b(16)-98++, b(16)++, b(17)++, b(17)-98++, b(17)-196++, b(18)-196++, b(18)++, b(18)-294++

**Matched y ions:** y(2), y(4)-98, y(4), y(5)++, y(5)-98, y(5), y(6)++, y(6), y(6)-98, y(7)++, y(7)-98++, y(7)-98, y(7), y(7)-196++, y(7)-196, y(8)-98++, y(8)-196++, y(8)++, y(8)-98, y(8)-196, y(8), y(9)-196++, y(9)-98++, y(9)-196, y(9)++, y(9)-98, y(10), y(10)-196++, y(10)-196, y(10)-98, y(10)++, y(10)-98++, y(11)-294++, y(11)-196++, y(11)++, y(12)-294++, y(12)-196++, y(12)-98++, y(12)++, y(13)++, y(13)-98++, y(13)-196++, y(13)-294++, y(14)-98++, y(14)++, y(14)-196++, y(14)-294++, y(15)++, y(15)-294++, y(15)-196++, y(15)-98++, y(16)++, y(16)-294++, y(16)-196++, y(16)-98++, y(17)-294++, y(17)-196++, y(18)++, y(18)-196++, y(19)-294++

**Precursor origin neutral loss:** +

## Peptide No.1088

**TDHGAEIVYKSPVVS**GDTS**PR**

**Confirmed sites:** @S:11,@S:19

**Ambiguous sites:**

MS/MS Fragmentation of **TDHGAEIVYKSPVVS**GDTS**PR**

Found in **TAU\_MOUSE**, Microtubule-associated protein tau OS=Mus musculus GN=Mapt PE=1 SV=3

Match to Query 6167: 2430.087669 from(811.036499,3+)

Title: Elution from: 35.778 to 35.778 scan no 2878 cid35.00 polarity:+:MA10:m1s

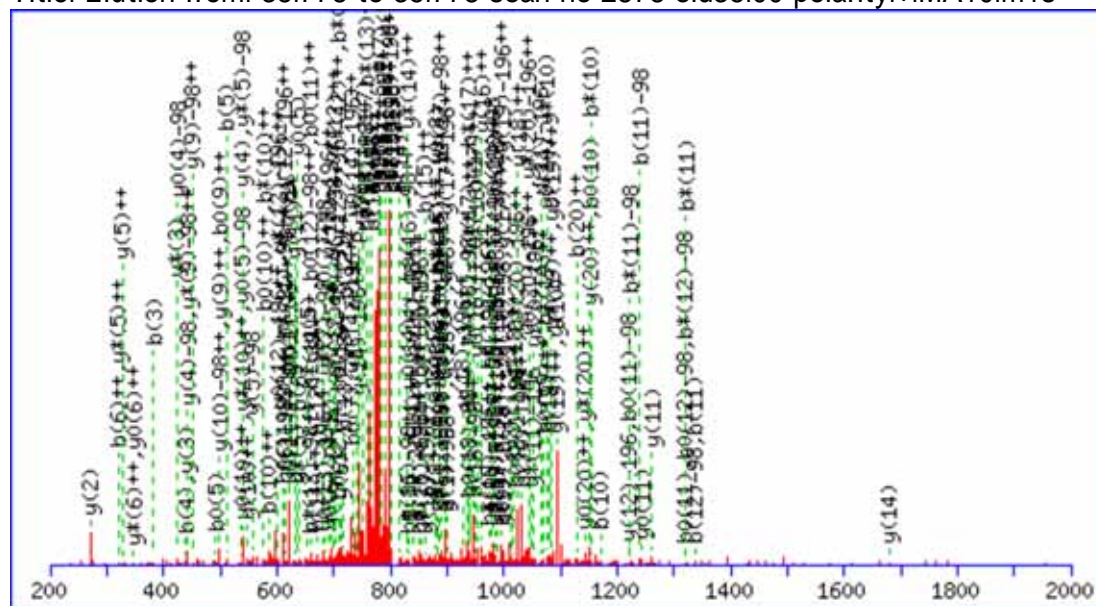

**Monoisotopic mass of neutral peptide Mr(calc):** 2430.0869

**Fixed modifications:** Carbamidomethyl (C) (apply to specified residues or termini only)

**Variable modifications:**

**N-term :** Dimethyl (N-term)

**K10 :** Dimethyl (K)

**S11 :** Phospho (ST), with neutral losses 0.0000(shown in table), 97.9769

**S19 :** Phospho (ST), with neutral losses 0.0000(shown in table), 97.9769

**Ions Score:** 41 **Expect:** 0.0063

**Matched b ions:** b(3), b(4), b(5), b(6)++, b(6), b(7), b(8), b(9), b(10)++, b(10), b(11)-98++, b(11)-98, b(11), b(11)++, b(12)-98, b(12)-98++, b(12)++, b(13)-98++, b(13)++, b(14)-98++, b(14)++, b(15)++, b(16)++, b(16)-98++, b(17)-98++, b(17)++, b(18)++, b(18)-98++, b(19)-98++, b(19)-196++, b(19)++, b(20)-196++, b(20)-98++, b(20)++

**Matched y ions:** y(2), y(3), y(4)-98, y(4), y(5)++, y(5)-98, y(5), y(6)-98, y(6), y(7), y(7)-98, y(8), y(8)-98, y(9)++, y(9)-98++, y(9)-98, y(9), y(10)-98++, y(10), y(10)-98, y(10)++, y(11), y(11)-98, y(11)-98++, y(11)++, y(11)-196, y(12)-196++, y(12)++, y(12)-98++, y(12)-196, y(12)-98, y(13)++, y(13)-196++, y(13)-98++, y(14), y(14)-196++, y(14)-98++, y(14)++, y(15)++, y(15)-196++, y(15)-98++, y(16)++, y(16)-196++, y(16)-98++, y(17)-196++, y(17)++, y(17)-98++, y(18)++, y(18)-196++, y(18)-98++, y(19)++, y(19)-98++, y(19)-196++, y(20)++, y(20)-98++, y(20)-196++

**Precursor origin neutral loss:** +

## Peptide No.1089

**TDHGAEIVYKSPVVS**GDTS**PR**

**Confirmed sites:** @S:11,@T:18

**Ambiguous sites:**

MS/MS Fragmentation of **TDHGAEIVYKSPVVS**GDTS**PR**

Found in **TAU\_MOUSE**, Microtubule-associated protein tau OS=Mus musculus GN=Mapt PE=1 SV=3

Match to Query 7337: 2430.088244 from(608.529337,4+)

Title: Elution from: 35.876 to 35.876 scan no 3108 cid35.00 polarity:+:MA10:m1s

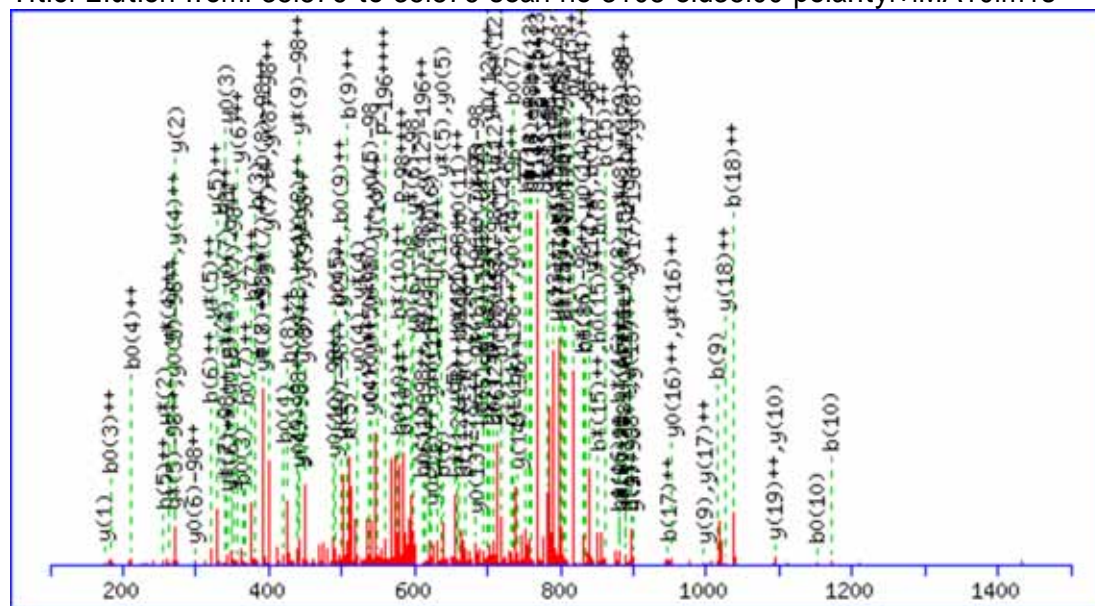

**Monoisotopic mass of neutral peptide Mr(calc):** 2430.0869

**Fixed modifications:** Carbamidomethyl (C) (apply to specified residues or termini only)

**Variable modifications:**

**N-term :** Dimethyl (N-term)

**K10 :** Dimethyl (K)

**S11 :** Phospho (ST), with neutral losses 0.0000(shown in table), 97.9769

**T18 :** Phospho (ST), with neutral losses 0.0000(shown in table), 97.9769

**Ions Score:** 41 **Expect:** 0.0059

**Matched b ions:** b(3), b(4), b(5), b(5)++, b(6)++, b(6), b(7)++, b(7), b(8)++, b(8), b(9), b(9)++, b(10), b(10)++, b(11)-98++, b(11)++, b(12)++, b(12)-98++, b(13)++, b(13)-98++, b(14)-98++, b(14)++, b(15)++, b(16)++, b(16)-98++, b(17)-98++, b(17)++, b(18)++

**Matched y ions:** y(1), y(2), y(4)++, y(4), y(4)-98, y(5), y(5)++, y(6), y(6)++, y(6)-98, y(7), y(7)++, y(7)-98++, y(7)-98, y(8), y(8)-98++, y(8)++, y(8)-98, y(9)-98++, y(9)-98, y(9)++, y(9), y(10), y(10)-98++, y(10)++, y(11)-98++, y(11)++, y(12)++, y(12)-196++, y(12)-98++, y(13)++, y(13)-196++, y(13)-98++, y(14)-98++, y(14)++, y(14)-196++, y(15)-196++, y(15)++, y(17)-196++, y(17)++, y(18)-98++, y(18)++, y(19)++

**Precursor origin neutral loss:** +

## Peptide No.1090

**TDHGAEIVYKSPVVS GDTSPR**

**Confirmed sites:** @Y:9,@S:15,@S:19

**Ambiguous sites:**

MS/MS Fragmentation of **TDHGAEIVYKSPVVS GDTSPR**

Found in **TAU\_MOUSE**, Microtubule-associated protein tau OS=Mus musculus GN=Mapt PE=1 SV=3

Match to Query 6739: 2510.054720 from(628.520956,4+)

Title: Elution from: 37.685 to 37.685 scan no 3193 cid35.00 polarity:+:MA10:m1s



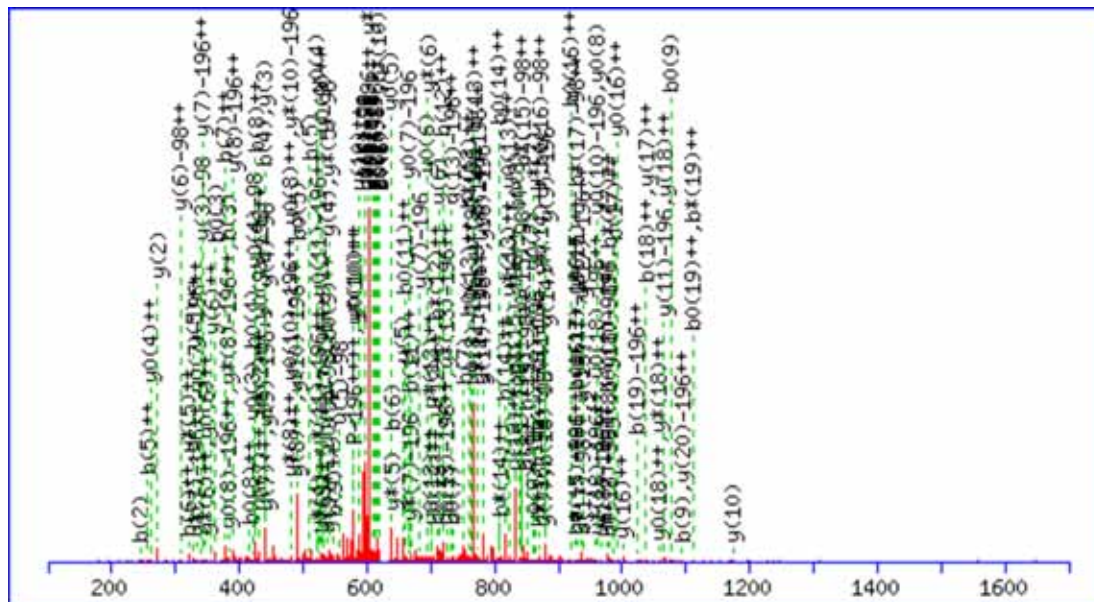

**Monoisotopic mass of neutral peptide Mr(calc):** 2510.0533

**Fixed modifications:** Carbamidomethyl (C) (apply to specified residues or termini only)

**Variable modifications:**

**N-term :** Dimethyl (N-term)

**Y9 :** Phospho (Y)

**K10 :** Dimethyl (K)

**S15 :** Phospho (ST), with neutral losses 0.0000(shown in table), 97.9769

**S19 :** Phospho (ST), with neutral losses 0.0000(shown in table), 97.9769

**Ions Score:** 41 **Expect:** 0.0051

**Matched b ions:** b(2), b(3), b(4), b(5)++, b(5), b(6)++, b(6), b(7)++, b(7), b(8)++, b(8), b(9), b(9)++, b(11)++, b(12)++, b(13)++, b(14)++, b(15)-98++, b(16)-98++, b(16)++, b(17)-98++, b(17)++, b(18)++, b(19)-196++

**Matched y ions:** y(2), y(3), y(3)-98, y(4)-98, y(4), y(5)++, y(5)-98, y(5), y(6), y(6)-98++, y(6)++, y(6)-98, y(7)++, y(7)-98, y(7)-98++, y(7), y(7)-196++, y(7)-196, y(8)-98++, y(8)++, y(8), y(8)-196, y(8)-196++, y(8)-98, y(9)-196++, y(9)-98++, y(9)++, y(9)-196, y(9)-98, y(10)-196++, y(10)-196, y(10), y(10)++, y(10)-98, y(10)-98++, y(11)-196, y(11)-196++, y(11)-98++, y(12)++, y(12)-196++, y(12)-98++, y(13)++, y(13)-98++, y(13)-196++, y(14)-98++, y(14)-196++, y(14)++, y(15)++, y(15)-98++, y(15)-196++, y(16)++, y(16)-98++, y(17)-196++, y(17)++, y(18)++, y(18)-196++, y(20)-196++

**Precursor origin neutral loss:** +

## Peptide No.1091

**TDHGAEIVYKSPVVS**GDTS**PR**

**Confirmed sites:** @Y:9,@S:15,@T:18

**Ambiguous sites:**

MS/MS Fragmentation of **TDHGAEIVYKSPVVS**GDTS**PR**

Found in **TAU\_MOUSE**, Microtubule-associated protein tau OS=Mus musculus GN=Mapt PE=1 SV=3

Match to Query 7561: 2510.054064 from(628.520792,4+)

Title: Elution from: 37.733 to 37.733 scan no 3363 cid35.00 polarity:+:MA10:m1s



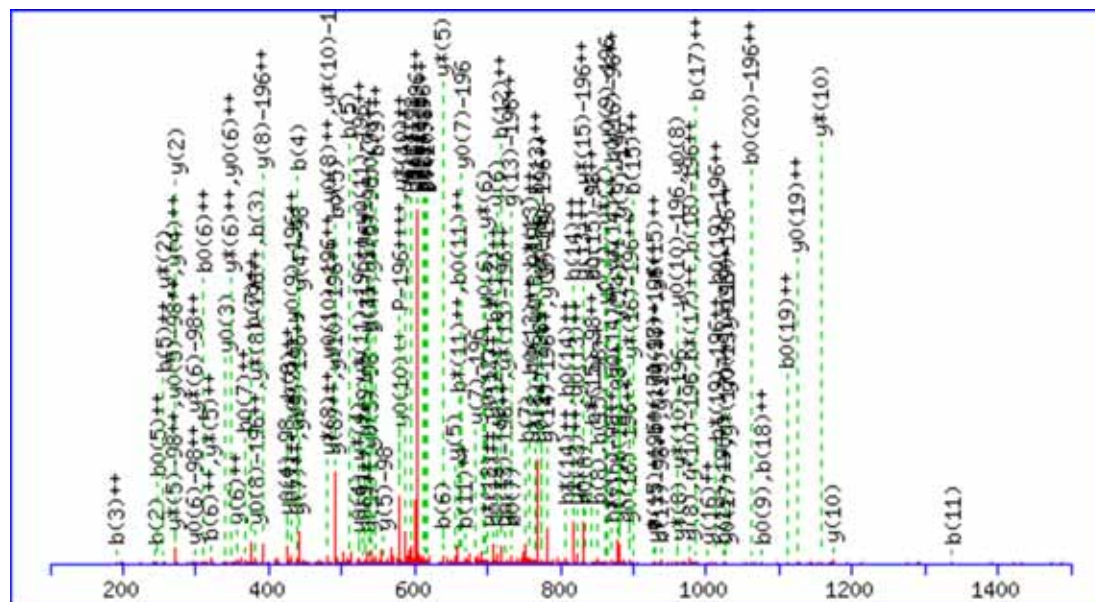

**Monoisotopic mass of neutral peptide Mr(calc): 2510.0533**

**Fixed modifications:** Carbamidomethyl (C) (apply to specified residues or termini only)

**Variable modifications:**

**N-term :** Dimethyl (N-term)

**Y9 :** Phospho (Y)

**K10 :** Dimethyl (K)

**S15 :** Phospho (ST), with neutral losses 97.9769(shown in table), 0.0000

**T18 :** Phospho (ST), with neutral losses 97.9769(shown in table), 0.0000

**Ions Score: 60 Expect: 5.4e-005**

**Matched b ions:** b(2), b(3)++, b(3), b(4), b(5)++, b(5), b(6)++, b(6), b(7)++, b(7), b(8)++, b(8), b(9)++, b(11), b(11)++, b(12)++, b(13)++, b(14)++, b(15)-98++, b(15)++, b(16)-98++, b(17)-98++, b(17)++, b(18)-196++, b(18)++, b(18)-98++, b(19)-196++

**Matched y ions:** y(2), y(4), y(4)-98, y(4)++, y(5)-98, y(5), y(6)++, y(6)-98, y(6), y(7)-98++, y(7)++, y(7)-98, y(7), y(7)-196, y(8)++, y(8), y(8)-196++, y(8)-98++, y(8)-196, y(8)-98, y(9)-98++, y(9)-196++, y(9)-196, y(9)-98, y(9)++, y(10)-196++, y(10)-196, y(10)++, y(10), y(10)-98, y(10)-98++, y(11)-196++, y(12)++, y(12)-196++, y(12)-98++, y(13)++, y(13)-98++, y(13)-196++, y(14)-98++, y(14)-196++, y(14)++, y(15)++, y(15)-98++, y(16)++, y(16)-98++, y(17)-98++

**Precursor origin neutral loss: +**

## Peptide No.1092

**TDHGAEIVYKSPVVS**GDTS**PR**

**Confirmed sites:** @Y:9,@S:19

**Ambiguous sites:**

MS/MS Fragmentation of **TDHGAEIVYKSPVVS**GDTS**PR**

Found in **TAU\_MOUSE**, Microtubule-associated protein tau OS=Mus musculus GN=Mapt PE=1 SV=3

Match to Query 7338: 2430.088815 from(811.036881,3+)

Title: Elution from: 36.066 to 36.066 scan no 3134 cid35.00 polarity:+:MA10:m1s

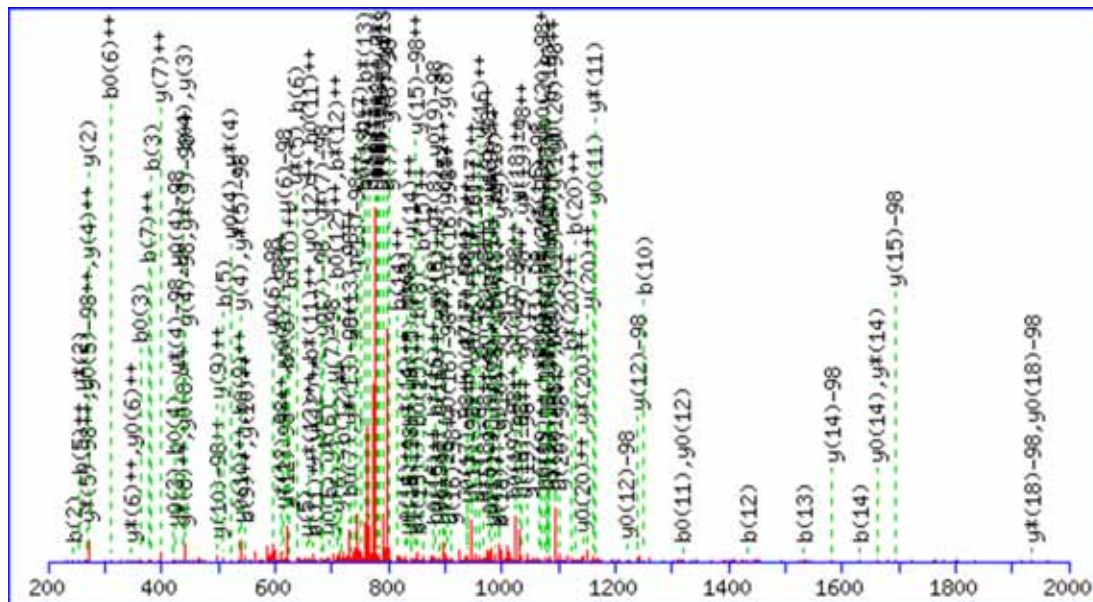

**Monoisotopic mass of neutral peptide Mr(calc):** 2430.0869

**Fixed modifications:** Carbamidomethyl (C) (apply to specified residues or termini only)

**Variable modifications:**

**N-term :** Dimethyl (N-term)

**Y9 :** Phospho (Y)

**K10 :** Dimethyl (K)

**S19 :** Phospho (ST), with neutral losses 97.9769(shown in table), 0.0000

**Ions Score:** 38 **Expect:** 0.011

**Matched b ions:** b(2), b(3), b(4), b(5), b(5)++, b(6), b(7)++, b(7), b(8), b(9), b(9)++, b(10), b(10)++, b(11)++, b(12), b(12)++, b(13), b(13)++, b(14), b(14)++, b(15)++, b(16)++, b(17)++, b(18)++, b(19)-98++, b(19)++, b(20)-98++, b(20)++

**Matched y ions:** y(2), y(3), y(4)-98, y(4), y(4)++, y(5), y(6), y(6)-98, y(7)++, y(7)-98, y(7), y(8), y(8)-98, y(9)-98, y(9)++, y(9), y(10), y(10)-98++, y(10)-98, y(10)++, y(11)-98, y(12)-98++, y(12)-98, y(12)++, y(13)++, y(13)-98++, y(14)-98, y(14)-98++, y(14)++, y(15)++, y(15)-98, y(15)-98++, y(16)-98++, y(16)++, y(17)++, y(17)-98++, y(18)-98++, y(18)++, y(19)++, y(19)-98++, y(20)++, y(20)-98++

**Precursor origin neutral loss:** +

## Peptide No.1093

**TDHGAEIVYKSPVVS**GDTS**PR**

**Confirmed sites:** @Y:9,@T:18

**Ambiguous sites:**

MS/MS Fragmentation of **TDHGAEIVYKSPVVS**GDTS**PR**

Found in **TAU\_MOUSE**, Microtubule-associated protein tau OS=Mus musculus GN=Mapt PE=1 SV=3

Match to Query 6336: 2430.088912 from(608.529504,+)

Title: Elution from: 35.799 to 35.799 scan no 2897 cid35.00 polarity:+:MA10:m1s

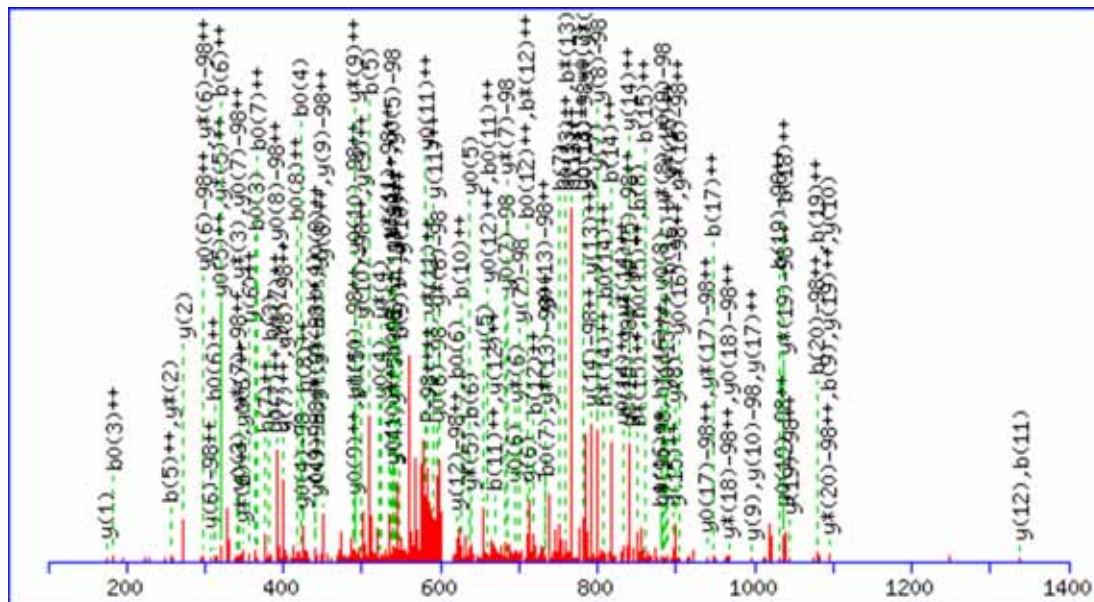

**Monoisotopic mass of neutral peptide Mr(calc):** 2430.0869

**Fixed modifications:** Carbamidomethyl (C) (apply to specified residues or termini only)

**Variable modifications:**

**N-term :** Dimethyl (N-term)

**Y9 :** Phospho (Y)

**K10 :** Dimethyl (K)

**T18 :** Phospho (ST), with neutral losses 0.0000(shown in table), 97.9769

**Ions Score:** 44 **Expect:** 0.003

**Matched b ions:** b(3), b(4), b(5), b(5)++, b(6)++, b(6), b(7), b(7)++, b(8)++, b(8), b(9), b(9)++, b(10)++, b(11), b(11)++, b(12)++, b(13)++, b(14)++, b(15)++, b(16)++, b(17)++, b(18)++, b(19)++, b(19)-98++, b(20)-98++

**Matched y ions:** y(1), y(2), y(4)-98, y(4), y(5), y(6), y(6)++, y(6)-98++, y(7)++, y(7), y(7)-98, y(8), y(8)-98++, y(8)++, y(8)-98, y(9)-98++, y(9)++, y(9), y(10), y(10)-98++, y(10)++, y(10)-98, y(11)-98++, y(11)++, y(12), y(12)-98++, y(12)++, y(13)++, y(14)-98++, y(14)++, y(15)++, y(17)++, y(19)++, y(19)-98++

**Precursor origin neutral loss:**

## Peptide No.1094

**TDHGAEIVYKSPVVSGDTSPR**

**Confirmed sites:** @S:11,@S:15,@S:19

**Ambiguous sites:**

**MS/MS Fragmentation of TDHGAEIVYKSPVVSGDTSPR**

Found in **TAU\_MOUSE**, Microtubule-associated protein tau OS=Mus musculus GN=Mapt PE=1 SV=3

Match to Query 6675: 2522.118324 from(631.536857,4+)

Title: Elution from: 37.604 to 37.604 scan no 3150 cid35.00 polarity:+:MA10:m1s



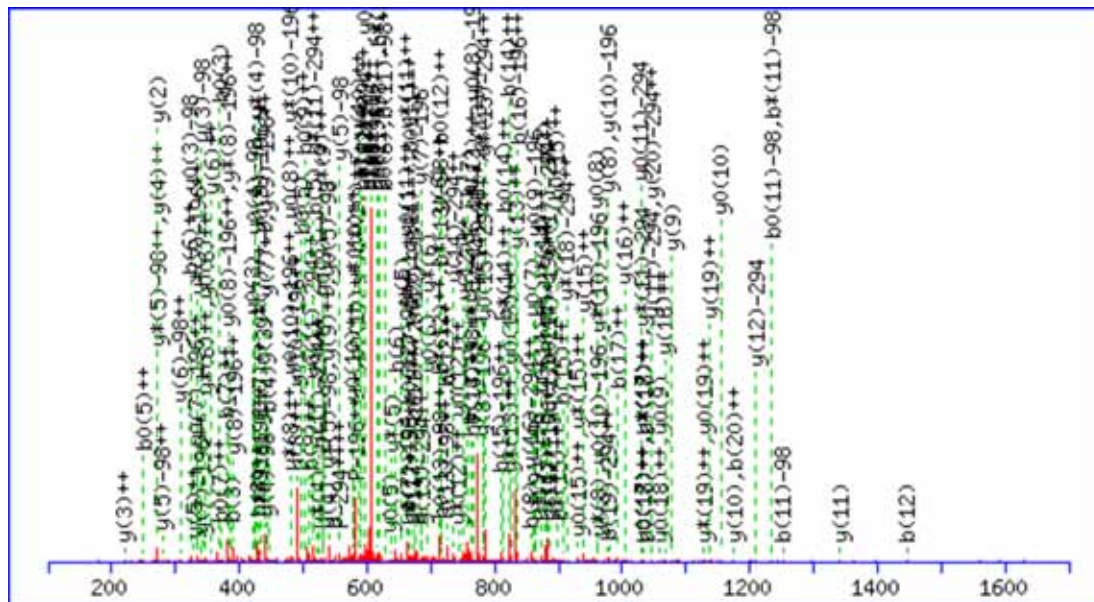

**Monoisotopic mass of neutral peptide Mr(calc):** 2522.1169

**Fixed modifications:** Carbamidomethyl (C) (apply to specified residues or termini only)

**Variable modifications:**

**N-term :** Dimethyl:2H(4)13C(2) (N-term)

**K10 :** Dimethyl:2H(4)13C(2) (K)

**S11 :** Phospho (ST), with neutral losses 0.0000(shown in table), 97.9769

**S15 :** Phospho (ST), with neutral losses 0.0000(shown in table), 97.9769

**S19 :** Phospho (ST), with neutral losses 0.0000(shown in table), 97.9769

**Ions Score:** 55 **Expect:** 0.00022

**Matched b ions:** b(3), b(4), b(5), b(6)++, b(6), b(7)++, b(7), b(8)++, b(8), b(9)++, b(10)++, b(11)-98, b(11)++, b(11)-98++, b(12), b(12)++, b(12)-98++, b(13)++, b(13)-98++, b(14)-98++, b(14)++, b(15)-98++, b(15)-196++, b(15)++, b(16)-196++, b(16)-98++, b(17)++, b(17)-98++, b(19)-196++, b(19)-294++, b(19)-98++, b(20)++, b(20)-196++

**Matched y ions:** y(2), y(3), y(3)++, y(3)-98, y(4), y(4)++, y(4)-98, y(5)-98++, y(5)++, y(5)-98, y(5), y(6), y(6)-98++, y(6)++, y(6)-98, y(7)++, y(7)-98++, y(7), y(7)-98, y(7)-196++, y(7)-196, y(8)-98++, y(8)++, y(8)-196++, y(8), y(8)-98, y(8)-196, y(9)-196++, y(9)-98++, y(9)++, y(9)-98, y(9), y(10)-196++, y(10)-98++, y(10)-196, y(10), y(10)++, y(11), y(11)-98, y(11)-294++, y(11)-196++, y(11)-98, y(11)++, y(11)-294, y(12)-294, y(12)++, y(12)-294, y(12)-98, y(13)++, y(13)-98, y(13)-294, y(13)-196, y(14)-98, y(14)++, y(14)-196, y(14)-294, y(15)++, y(15)-98, y(16)-294, y(16)-196, y(16)-98, y(16)++, y(18)++, y(19)-98, y(19)++, y(20)-294++

**Precursor origin neutral loss:** +

## Peptide No.1095

**TDHGAEIVYKSPVVS**GDTS**PR**

**Confirmed sites:** @S:11,@T:18,@S:19

**Ambiguous sites:**

MS/MS Fragmentation of **TDHGAEIVYKSPVVS**GDTS**PR**

Found in **TAU\_MOUSE**, Microtubule-associated protein tau OS=Mus musculus GN=Mapt PE=1 SV=3





Found in **TAU\_MOUSE**, Microtubule-associated protein tau OS=Mus musculus GN=Mapt PE=1 SV=3

Match to Query 6800: 2522.116800 from(631.536476,4+)

Title: Elution from: 37.567 to 37.567 scan no 3177 cid35.00 polarity+:MA10:m1s

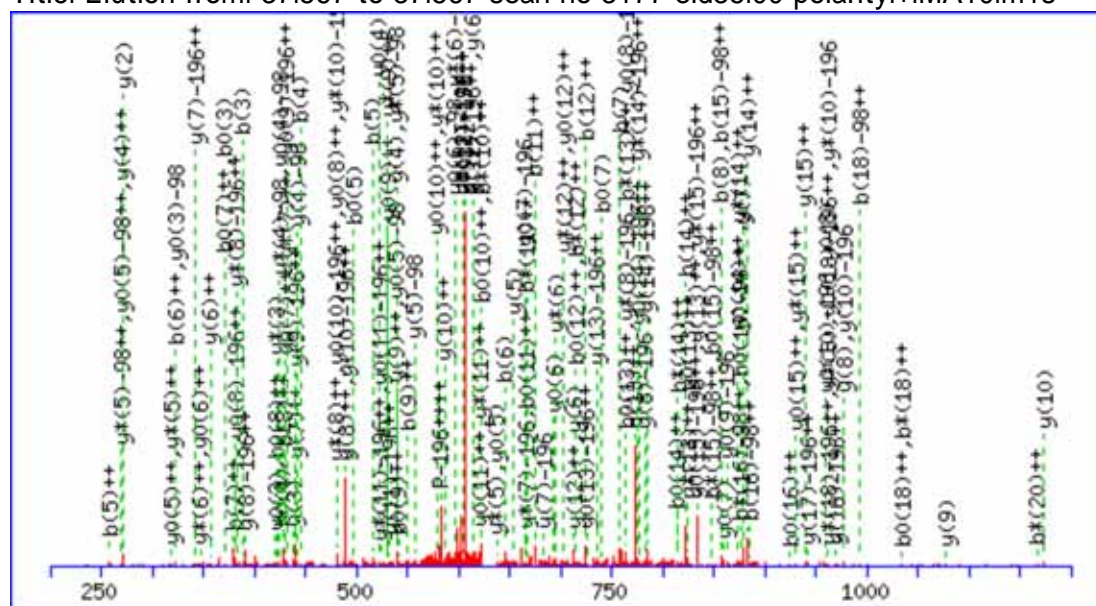

**Monoisotopic mass of neutral peptide Mr(calc): 2522.1169**

**Fixed modifications:** Carbamidomethyl (C) (apply to specified residues or termini only)

**Variable modifications:**

**N-term :** Dimethyl:2H(4)13C(2) (N-term)

**Y9 :** Phospho (Y)

**K10 :** Dimethyl:2H(4)13C(2) (K)

**S15 :** Phospho (ST), with neutral losses 97.9769(shown in table), 0.0000

**S19 :** Phospho (ST), with neutral losses 97.9769(shown in table), 0.0000

**Ions Score:** 37 **Expect:** 0.016

**Matched b ions:** b(3), b(4), b(5)++, b(5), b(6)++, b(6), b(7)++, b(7), b(8)++, b(8), b(9)++, b(11)++, b(12)++, b(13)++, b(14)++, b(15)-98++, b(16)-98++, b(18)-98++, b(19)-98++

**Matched y ions:** y(2), y(3), y(4)++, y(4)-98, y(4), y(5)-98, y(5), y(6), y(6)++, y(6)-98, y(7), y(7)-98++, y(7)++, y(7)-196++, y(7)-196, y(7)-98, y(8)++, y(8)-98++, y(8), y(8)-196++, y(8)-196, y(8)-98, y(9)-98++, y(9)-196++, y(9), y(9)++, y(10)-196++, y(10), y(10)-196, y(10)-98++, y(10)++, y(11)-98++, y(11)-196++, y(12)++, y(12)-196++, y(12)-98++, y(13)++, y(13)-98++, y(13)-196++, y(14)++, y(14)-98++, y(14)-196++, y(15)++, y(15)-98++, y(17)-196++, y(18)-196++

**Precursor origin neutral loss:** +

## Peptide No.1097

**TDSREDEISPPPPNPVVK**

**Confirmed sites:** @S:3,@S:9

**Ambiguous sites:**

**MS/MS Fragmentation of TDSREDEISPPPPNPVVK**

Found in **KAPO\_MOUSE**, cAMP-dependent protein kinase type I-alpha regulatory subunit OS=Mus musculus GN=Prkar1a PE=1 SV=3

Match to Query 5760: 2191.982559 from(731.668129,3+)

Title: Elution from: 38.960 to 38.960 scan no 3330 cid35.00 polarity:+:MA10:m1s

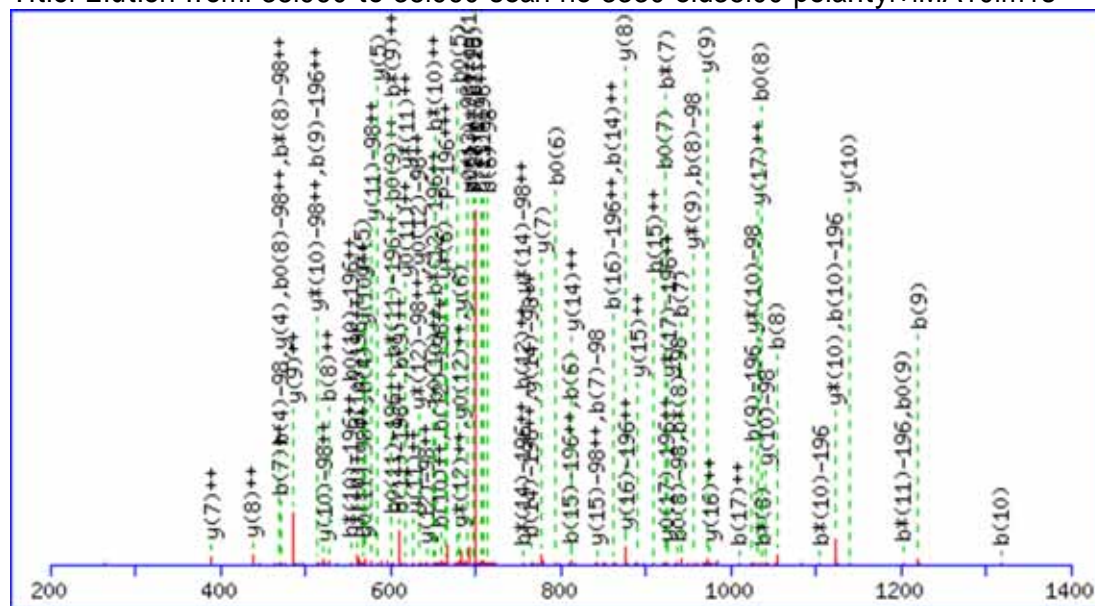

**Monoisotopic mass of neutral peptide Mr(calc):** 2191.9803

**Fixed modifications:** Carbamidomethyl (C) (apply to specified residues or termini only)

**Variable modifications:**

**N-term :** Dimethyl (N-term)

**S3 :** Phospho (ST), with neutral losses 97.9769(shown in table), 0.0000

**S9 :** Phospho (ST), with neutral losses 97.9769(shown in table), 0.0000

**K18 :** Dimethyl (K)

**Ions Score:** 62 **Expect:** 3.8e-005

**Matched b ions:** b(4)-98, b(4), b(5), b(6), b(6)-98, b(7), b(7)++, b(7)-98, b(8), b(8)++, b(8)-98, b(9)++, b(9)-98, b(9)-98++, b(9)-196++, b(9)-196, b(10)-98++, b(10)-196, b(10)-98, b(10), b(10)-196++, b(10)++, b(11)-196++, b(11)-98, b(11)-98++, b(11)++, b(12)-196++, b(12)-98++, b(12)++, b(13)-196++, b(13)-98++, b(14)-98++, b(14)-196++, b(14)++, b(15)-196++, b(15)++, b(15)-98++, b(16)-196++, b(17)-98++, b(17)++

**Matched y ions:** y(4), y(5), y(6), y(7), y(7)++, y(8)++, y(8), y(9)++, y(9), y(10)++, y(10)-98++, y(10), y(10)-98, y(11)-98++, y(11)++, y(12)-98++, y(12)++, y(13)-98++, y(14)++, y(14)-98++, y(15)-98++, y(15)++, y(16)-196++, y(16)-98++, y(16)++, y(17)-98++, y(17)++

**Precursor origin neutral loss:** +

## Peptide No.1098

**TDSREDEISPPPPNPVVK**

**Confirmed sites: @S:9**

**Ambiguous sites:**

MS/MS Fragmentation of **TDSREDEISPPPPNPVVK**

Found in **KAPO\_MOUSE**, cAMP-dependent protein kinase type I-alpha regulatory subunit OS=Mus musculus GN=Prkar1a PE=1 SV=3

Match to Query 4900: 2112.015801 from(705.012543,3+)







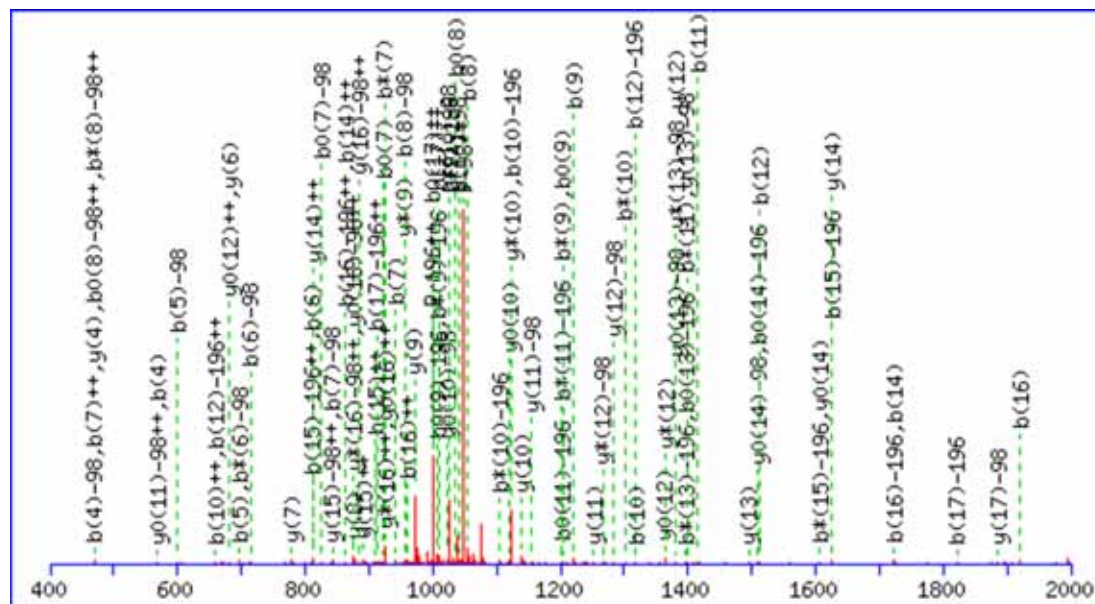

**Monoisotopic mass of neutral peptide Mr(calc):** 2191.9803

**Fixed modifications:** Carbamidomethyl (C) (apply to specified residues or termini only)

**Variable modifications:**

**N-term :** Dimethyl (N-term)

**T1 :** Phospho (ST), with neutral losses 97.9769(shown in table), 0.0000

**S9 :** Phospho (ST), with neutral losses 97.9769(shown in table), 0.0000

**K18 :** Dimethyl (K)

**Ions Score:** 46 **Expect:** 0.0015

**Matched b ions:** b(4)-98, b(4), b(5), b(5)-98, b(6), b(6)-98, b(7)++, b(7)-98, b(7), b(8)-98, b(8), b(9)-98, b(9), b(9)-196, b(10)-196, b(10)-98, b(10)++, b(10), b(11), b(11)-98++, b(11)-98, b(12)-98, b(12)-196++, b(12)-196, b(12), b(14)-98, b(14), b(14)-98++, b(14)++, b(15)-196++, b(15)-98, b(15)-196, b(15)++, b(16)-196, b(16)-98, b(16), b(16)++, b(16)-196++, b(16)-98++, b(17)-196, b(17)-98, b(17)-98++, b(17)-196++, b(17)++

**Matched y ions:** y(4), y(6), y(7), y(8), y(9), y(10), y(10)-98, y(11), y(11)-98, y(12)-98, y(12), y(13), y(13)-98, y(14), y(14)++, y(15)-98++, y(15)++, y(16)-98++, y(17)-98

**Precursor origin neutral loss:** +

## Peptide No.1100

**TDSREDEISPPPPNPVVK**

**Confirmed sites:** @S:3,@S:9

**Ambiguous sites:**

MS/MS Fragmentation of **TDSREDEISPPPPNPVVK**

Found in **KAPO\_MOUSE**, cAMP-dependent protein kinase type I-alpha regulatory subunit OS=Mus musculus GN=Prkar1a PE=1 SV=3

Match to Query 7268: 2204.045121 from(735.688983,3+)

Title: Elution from: 38.936 to 38.936 scan no 3487 cid35.00 polarity:+:MA10:m1s



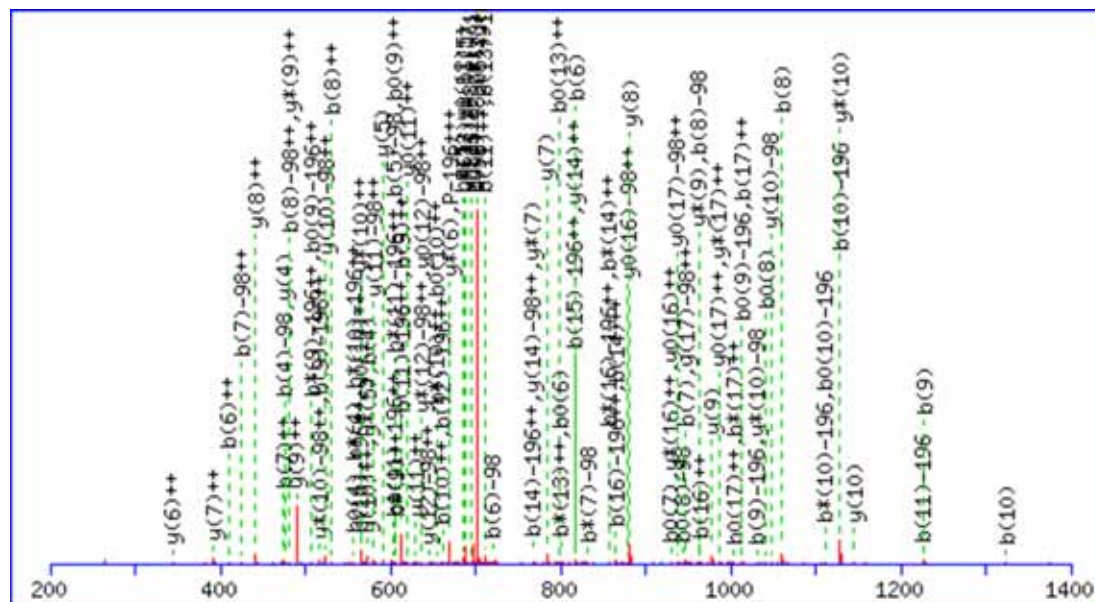

**Monoisotopic mass of neutral peptide Mr(calc):** 2204.0439

**Fixed modifications:** Carbamidomethyl (C) (apply to specified residues or termini only)

**Variable modifications:**

**N-term :** Dimethyl:2H(4)13C(2) (N-term)

**T1 :** Phospho (ST), with neutral losses 97.9769(shown in table), 0.0000

**S9 :** Phospho (ST), with neutral losses 97.9769(shown in table), 0.0000

**K18 :** Dimethyl:2H(4)13C(2) (K)

**Ions Score:** 61 **Expect:** 5.4e-005

**Matched b ions:** b(4), b(4)-98, b(5), b(5)-98, b(6), b(6)++, b(6)-98, b(7), b(7)++, b(7)-98++, b(8), b(8)-98, b(8)++, b(8)-98++, b(9)++, b(9)-98, b(9), b(9)-98++, b(9)-196++, b(9)-196, b(10)-98++, b(10), b(10)-98, b(10)-196, b(10)-196++, b(10)++, b(11)-196++, b(11)-98, b(11)-196, b(11)++, b(11)-98++, b(12)-98++, b(12)-196++, b(13)-196++, b(14)-98++, b(14)++, b(14)-196++, b(15)-196++, b(15)-98++, b(16)-196++, b(16)++, b(17)-98++, b(17)++

**Matched y ions:** y(4), y(5), y(6)++, y(6), y(7), y(7)++, y(8)++, y(8), y(9)++, y(9), y(10)-98++, y(10)++, y(10), y(10)-98, y(11)-98++, y(11)++, y(12)-98++, y(12)++, y(13)-98++, y(14)++, y(14)-98++, y(17)-98++

**Precursor origin neutral loss:** +

## Peptide No.1102

**TEDGGWEWSDEFDEESEEGR**

**Confirmed sites:** @S:9

**Ambiguous sites:**

**MS/MS Fragmentation of TEDGGWEWSDEFDEESEEGR**

Found in **OXR1\_MOUSE**, Serine/threonine-protein kinase OSR1 OS=Mus musculus GN=Oxsr1 PE=1 SV=1

Match to Query 6667: 2610.920318 from(1306.467435,2+)

Title: Elution from: 59.375 to 59.375 scan no 5600 cid35.00 polarity:+:MA10:m1s

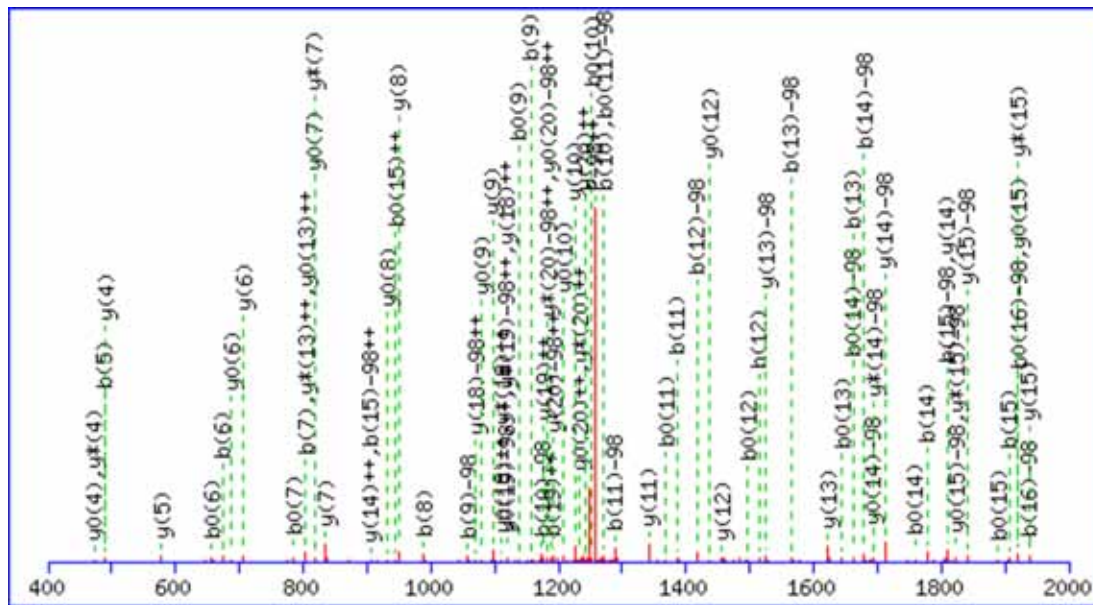

**Monoisotopic mass of neutral peptide Mr(calc):** 2610.9184

**Fixed modifications:** Carbamidomethyl (C) (apply to specified residues or termini only)

**Variable modifications:**

**N-term :** Dimethyl (N-term)

**S9 :** Phospho (ST), with neutral losses 97.9769(shown in table), 0.0000

**Ions Score:** 94 **Expect:** 5.6e-009

**Matched b ions:** b(5), b(6), b(7), b(8), b(9)-98, b(9), b(10)-98, b(10), b(11)-98, b(11), b(12)-98, b(12), b(13)-98, b(13), b(14)-98, b(14), b(15)-98, b(15), b(15)-98++, b(16)-98, b(19)++

**Matched y ions:** y(4), y(5), y(6), y(7), y(8), y(9), y(10), y(11), y(12), y(13)-98, y(13), y(14)-98, y(14), y(14)++, y(15)-98, y(15), y(18)++, y(18)-98++, y(19)++, y(20)-98++, y(20)++

**Precursor origin neutral loss:** +

## Peptide No.1103

**TEDGGWEWSDEFDEESEEGR**

**Confirmed sites:** @S:9

**Ambiguous sites:**

MS/MS Fragmentation of **TEDGGWEWSDEFDEESEEGR**

Found in **OXSRI\_MOUSE**, Serine/threonine-protein kinase OSR1 OS=Mus musculus GN=Oxsr1 PE=1 SV=1

Match to Query 6221: 2616.950658 from(1309.482605,2+)

Title: Elution from: 59.368 to 59.368 scan no 5400 cid35.00 polarity:+:MA10:m1s



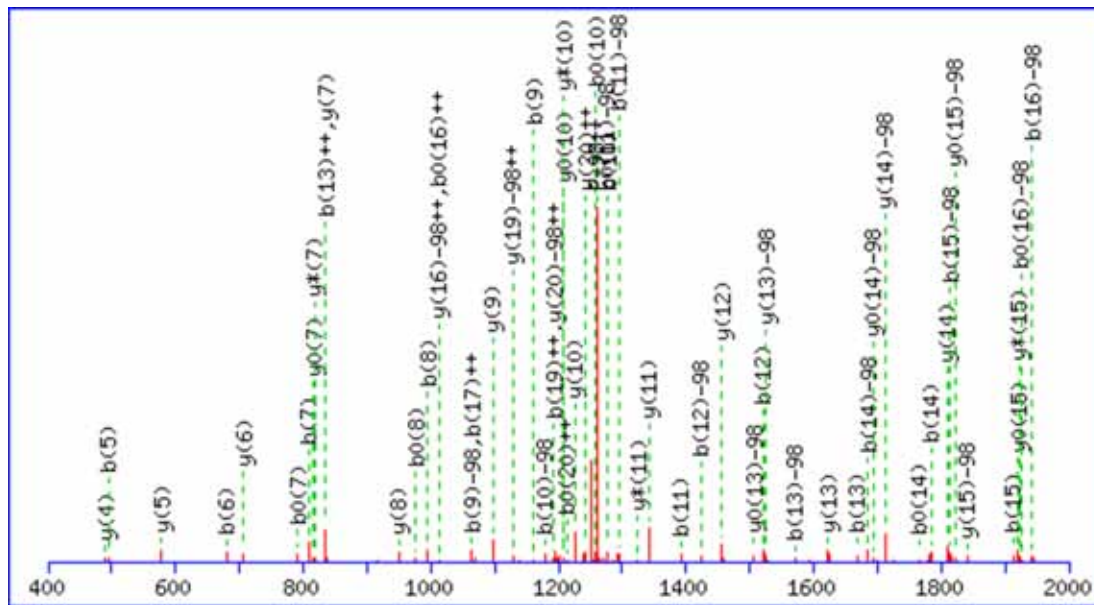

**Monoisotopic mass of neutral peptide Mr(calc):** 2616.9502

**Fixed modifications:** Carbamidomethyl (C) (apply to specified residues or termini only)

**Variable modifications:**

**N-term :** Dimethyl:2H(4)13C(2) (N-term)

**S9 :** Phospho (ST), with neutral losses 97.9769(shown in table), 0.0000

**Ions Score:** 84 **Expect:** 7.2e-008

**Matched b ions:** b(5), b(6), b(7), b(8), b(9)-98, b(9), b(10)-98, b(10), b(11)-98, b(11), b(12), b(12)-98, b(13)++, b(13)-98, b(13), b(14)-98, b(14), b(15)-98, b(15), b(16)-98, b(17)++, b(19)++

**Matched y ions:** y(4), y(5), y(6), y(7), y(8), y(9), y(10), y(11), y(12), y(13)-98, y(13), y(14)-98, y(14), y(15)-98, y(16)-98++, y(19)-98++, y(20)++, y(20)-98++

**Precursor origin neutral loss:** +

## Peptide No.1104

**TETKVTK**

**Confirmed sites:** @T:6

**Ambiguous sites:**

**MS/MS Fragmentation of TETKVTK**

Found in **ARVC\_MOUSE**, Armadillo repeat protein deleted in velo-cardio-facial syndrome homolog  
 OS=Mus musculus GN=Arvcf PE=1 SV=2

Match to Query 426: 981.577290 from(328.199706,3+)

Title: Elution from: 37.497 to 37.497 scan no 3167 cid35.00 polarity:+:MA10

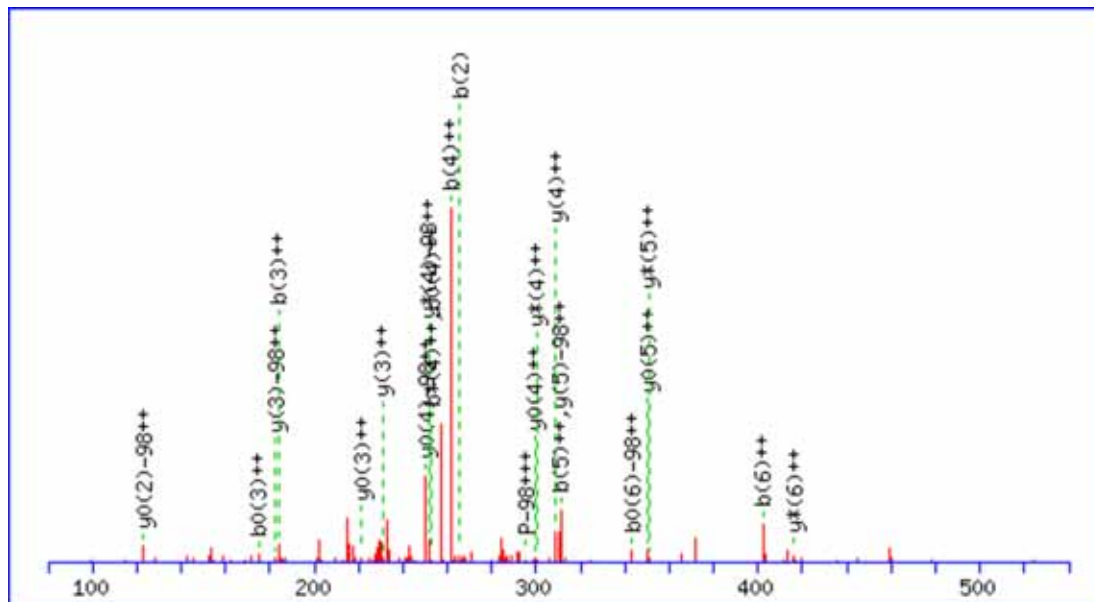

**Monoisotopic mass of neutral peptide Mr(calc):** 981.5784

**Fixed modifications:** Carbamidomethyl (C) (apply to specified residues or termini only)

**Variable modifications:**

**N-term :** Dimethyl:2H(4)13C(2) (N-term)

**K4 :** Dimethyl (K)

**T6 :** Phospho (ST), with neutral losses 0.0000(shown in table), 97.9769

**K7 :** Dimethyl:2H(4)13C(2) (K)

**Ions Score:** 32 **Expect:** 0.0051

**Matched b ions:** b(2), b(3)++, b(4)++, b(5)++, b(6)++

**Matched y ions:** y(3)-98++, y(3)++, y(4)++, y(5)-98++

**Precursor origin neutral loss:**

## Peptide No.1105

**TGDLGIPPNPEDRSPSPEPIYNSEGK**

**Confirmed sites:** @S:14,@S:16

**Ambiguous sites:**

MS/MS Fragmentation of **TGDLGIPPNPEDRSPSPEPIYNSEGK**

Found in **SF01\_MOUSE**, Splicing factor 1 OS=Mus musculus GN=Sf1 PE=1 SV=5

Match to Query 8552: 2981.311665 from(994.777831,3+)

Title: Elution from: 48.975 to 48.975 scan no 4790 cid35.00 polarity:+:MA10:m1s

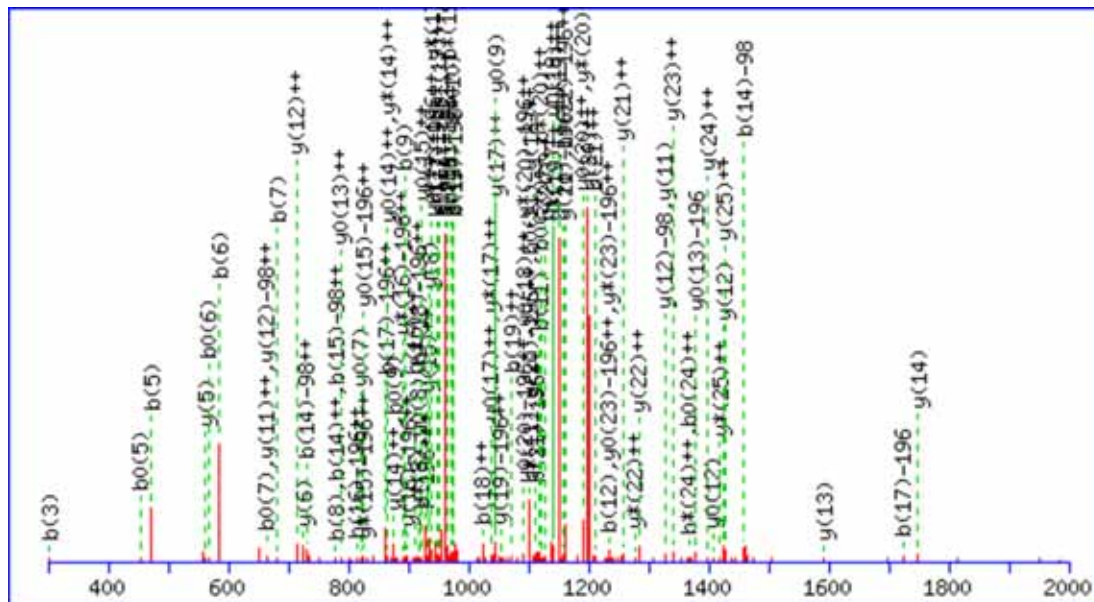

**Monoisotopic mass of neutral peptide Mr(calc):** 2981.3096

**Fixed modifications:** Carbamidomethyl (C) (apply to specified residues or termini only)

**Variable modifications:**

**N-term :** Dimethyl (N-term)

**S14 :** Phospho (ST), with neutral losses 0.0000(shown in table), 97.9769

**S16 :** Phospho (ST), with neutral losses 0.0000(shown in table), 97.9769

**K26 :** Dimethyl (K)

**Ions Score:** 68 **Expect:** 1.5e-005

**Matched b ions:** b(3), b(5), b(6), b(7), b(8), b(9), b(11), b(12), b(14)-98++, b(14)-98, b(14)++, b(15)-98++, b(16)-98++, b(16)-98, b(16)-196++, b(16)++, b(17)-196++, b(17)-196, b(17)-98++, b(18)-98, b(18)++, b(18)-98++, b(19)-98++, b(19)-196++, b(19)++, b(20)++, b(21)-98++, b(21)++, b(21)-196++, b(24)-98++

**Matched y ions:** y(5), y(6), y(8), y(10), y(11)++, y(11), y(12)++, y(12)-98++, y(12), y(12)-98, y(13), y(14), y(14)++, y(14)-98++, y(15)-98++, y(15)++, y(16)-196++, y(16)-98++, y(17)++, y(17)-196++, y(18)++, y(18)-98++, y(19)-98++, y(19)++, y(19)-196++, y(20)-196++, y(20)++, y(20)-98++, y(21)++, y(21)-98++, y(21)-196++, y(22)++, y(22)-98++, y(23)++, y(24)++, y(25)-98++, y(25)++

**Precursor origin neutral loss:** +

## Peptide No.1106

**TGDLGIPPNPEDRSPSPEPIYNSEGK**

**Confirmed sites:** @S:14,@S:16

**Ambiguous sites:**

MS/MS Fragmentation of **TGDLGIPPNPEDRSPSPEPIYNSEGK**

Found in **SF01\_MOUSE**, Splicing factor 1 OS=Mus musculus GN=Sf1 PE=1 SV=5

Match to Query 7403: 2993.375436 from(998.799088,3+)

Title: Elution from: 48.031 to 48.031 scan no 4460 cid35.00 polarity:+:MA10:m1s

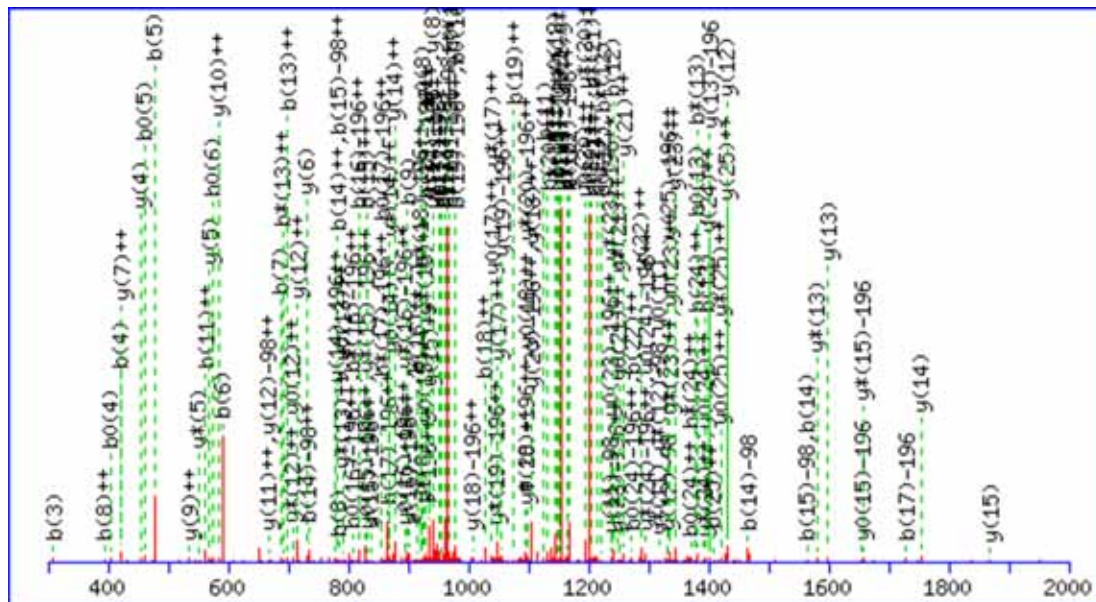

**Monoisotopic mass of neutral peptide Mr(calc):** 2993.3733

**Fixed modifications:** Carbamidomethyl (C) (apply to specified residues or termini only)

**Variable modifications:**

**N-term :** Dimethyl:2H(4)13C(2) (N-term)

**S14 :** Phospho (ST), with neutral losses 0.0000(shown in table), 97.9769

**S16 :** Phospho (ST), with neutral losses 0.0000(shown in table), 97.9769

**K26 :** Dimethyl:2H(4)13C(2) (K)

**Ions Score:** 86 **Expect:** 2.6e-007

**Matched b ions:** b(3), b(4), b(5), b(6), b(7), b(8)++, b(8), b(9), b(11)++, b(11), b(12), b(13)++, b(13), b(14)-98++, b(14)-98, b(14), b(14)++, b(15)-98, b(15)-98++, b(15)++, b(16)-98++, b(16)-98, b(16)-196++, b(16)++, b(17)-196++, b(17)-196, b(17)-98++, b(17)++, b(18)++, b(18)-98++, b(18)-196++, b(19)-98++, b(19)-196++, b(19)++, b(20)-98++, b(20)++, b(21)++, b(21)-98++, b(22)-98++, b(22)++, b(24)-98++, b(24)++, b(25)-98++, b(25)++

**Matched y ions:** y(4), y(5), y(6), y(7)++, y(8), y(9)++, y(10), y(10)++, y(11)++, y(11)-98, y(12)++, y(12), y(12)-98, y(12)-98++, y(13), y(13)-196, y(14)-98, y(14), y(14)++, y(14)-98++, y(14)-196++, y(15), y(15)-196++, y(15)-98++, y(15)++, y(16)-196++, y(16)-98++, y(17)++, y(17)-196++, y(18)++, y(18)-98++, y(18)-196++, y(19)-98++, y(19)++, y(19)-196++, y(20)-196++, y(20)-98++, y(20)++, y(21)++, y(21)-98++, y(22)++, y(22)-98++, y(23)++, y(23)-98++, y(23)-196++, y(24)++, y(25)-98++, y(25)++, y(25)-196++

**Precursor origin neutral loss:** +

## Peptide No.1107

**TGEADLSHTSSDDESR**

**Confirmed sites:**

**Ambiguous sites:** @S:10orS:11

MS/MS Fragmentation of **TGEADLSHTSSDDESR**

Found in **OBSCN\_MOUSE**, Obscurin OS=Mus musculus GN=Obscn PE=2 SV=2

Match to Query 3486: 1813.701834 from(907.858193,2+)

Title: Elution from: 24.275 to 24.275 scan no 1379 cid35.00 polarity:+:MA10



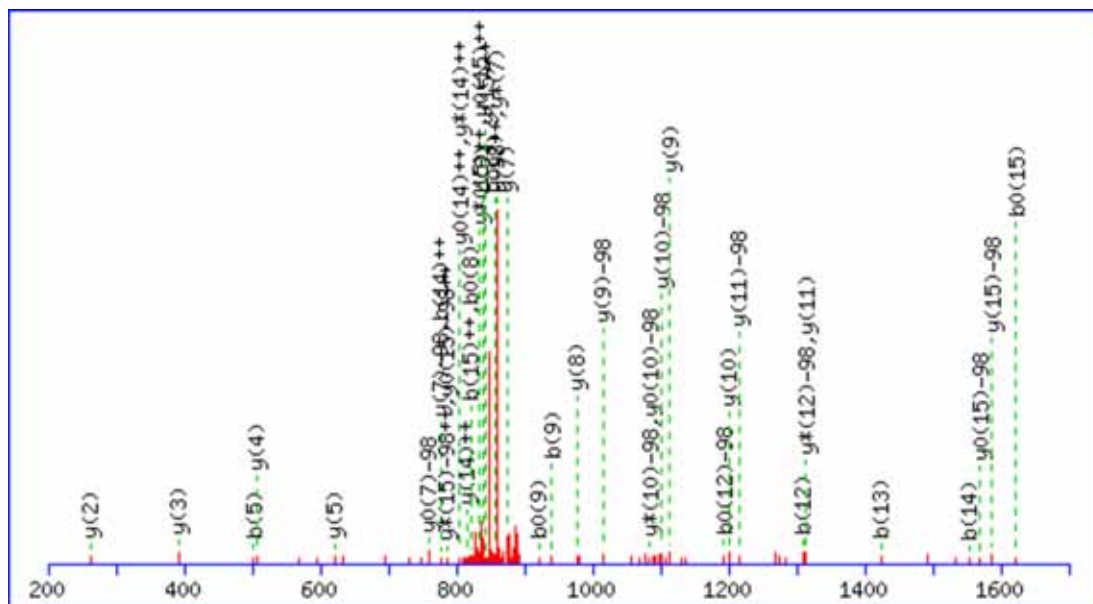

**Monoisotopic mass of neutral peptide Mr(calc):** 1813.7003

**Fixed modifications:** Carbamidomethyl (C) (apply to specified residues or termini only)

**Variable modifications:**

**N-term :** Dimethyl (N-term)

**S11 :** Phospho (ST), with neutral losses 0.0000(shown in table), 97.9769

**Ions Score:** 45 **Expect:** 0.0005

**Matched b ions:** b(5), b(8), b(9), b(12), b(13), b(14), b(14)++, b(15)++

**Matched y ions:** y(2), y(3), y(4), y(5), y(7), y(7)-98, y(8), y(9)-98, y(9), y(10), y(10)-98, y(11), y(11)-98, y(14)++, y(15)-98, y(15)++

**Precursor origin neutral loss:** +

## Peptide No.1108

**TGEADLSHTSSDDESR**

**Confirmed sites:** @T:9

**Ambiguous sites:** @S:10orS:11

**MS/MS Fragmentation of TGEADLSHTSSDDESR**

Found in **OBSCN\_MOUSE**, Obscurin OS=Mus musculus GN=Obscn PE=2 SV=2

Match to Query 4350: 1893.667506 from(947.841029,2+)

Title: Elution from: 25.520 to 25.520 scan no 1535 cid35.00 polarity:+:MA10:m1s

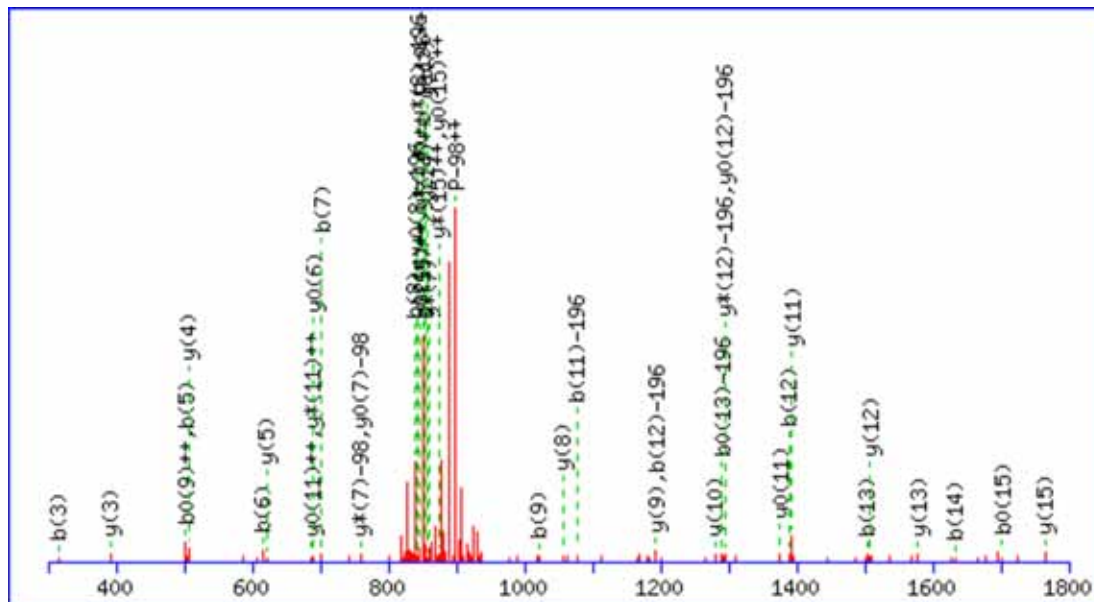

**Monoisotopic mass of neutral peptide Mr(calc):** 1893.6667

**Fixed modifications:** Carbamidomethyl (C) (apply to specified residues or termini only)

**Variable modifications:**

**N-term :** Dimethyl (N-term)

**T9 :** Phospho (ST), with neutral losses 0.0000(shown in table), 97.9769

**S10 :** Phospho (ST), with neutral losses 0.0000(shown in table), 97.9769

**Ions Score:** 45 **Expect:** 0.00029

**Matched b ions:** b(3), b(5), b(6), b(7), b(8), b(9), b(11)-196, b(12)-196, b(12)-98, b(12), b(13), b(14)-98, b(14)

**Matched y ions:** y(3), y(4), y(5), y(8), y(9), y(10), y(10)-98, y(11), y(11)-98, y(12), y(13), y(13)-98++, y(14)++, y(15), y(15)-98

**Precursor origin neutral loss:** +

## Peptide No.1109

**TGEADLSHTSSDDESR**

**Confirmed sites:** @S:7,@S:10

**Ambiguous sites:**

MS/MS Fragmentation of **TGEADLSHTSSDDESR**

Found in **OBSCN\_MOUSE**, Obscurin OS=Mus musculus GN=Obscn PE=2 SV=2

Match to Query 3896: 1899.698468 from(950.856510,2+)

Title: Elution from: 25.322 to 25.322 scan no 1467 cid35.00 polarity:+:MA10

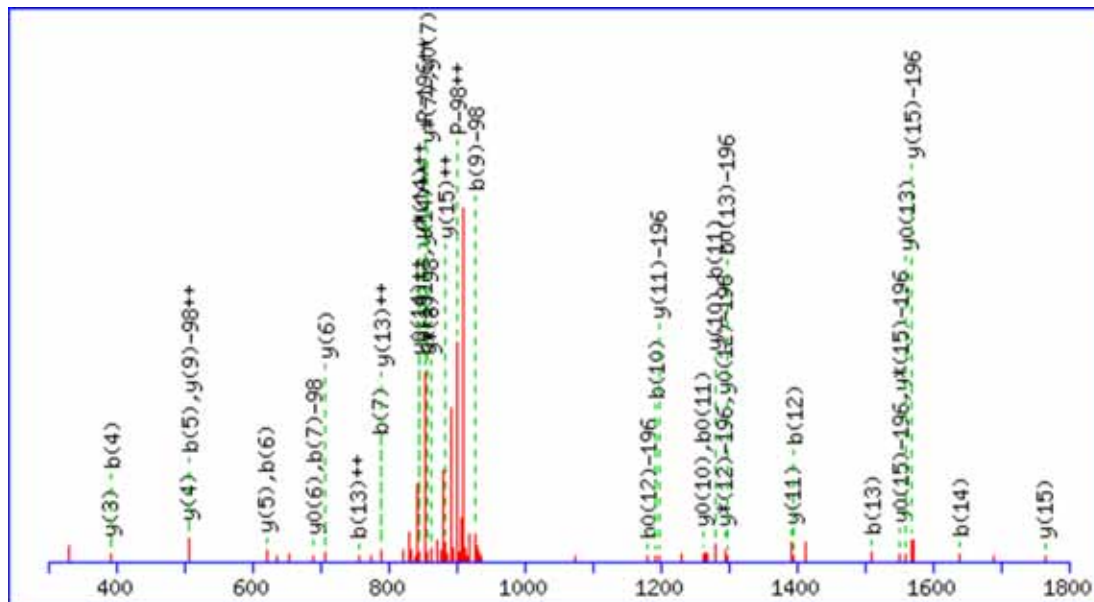

**Monoisotopic mass of neutral peptide Mr(calc):** 1899.6985

**Fixed modifications:** Carbamidomethyl (C) (apply to specified residues or termini only)

**Variable modifications:**

**N-term :** Dimethyl:2H(4)13C(2) (N-term)

**S7 :** Phospho (ST), with neutral losses 0.0000(shown in table), 97.9769

**S10 :** Phospho (ST), with neutral losses 0.0000(shown in table), 97.9769

**Ions Score:** 42 **Expect:** 0.00089

**Matched b ions:** b(4), b(5), b(6), b(7), b(7)-98, b(9)-98, b(10), b(11), b(11)-98, b(12), b(12)-98, b(13), b(13)-98, b(13)++, b(14)

**Matched y ions:** y(3), y(4), y(5), y(6), y(9)-98++, y(10), y(10)-98, y(11), y(11)-98, y(11)-196, y(13)++, y(14)++, y(15)-196, y(15), y(15)-98++, y(15)++

**Precursor origin neutral loss:** +

## Peptide No.1110

**TGEPDEEEGTFRRSIR**

**Confirmed sites:** @S:13

**Ambiguous sites:**

MS/MS Fragmentation of **TGEPDEEEGTFRRSIR**

Found in **PLM\_MOUSE**, Phospholemman OS=Mus musculus GN=Fxyd1 PE=1 SV=1

Match to Query 3994: 1916.816277 from(639.946035,3+)

Title: Elution from: 33.658 to 33.658 scan no 2492 cid35.00 polarity:+:MA10

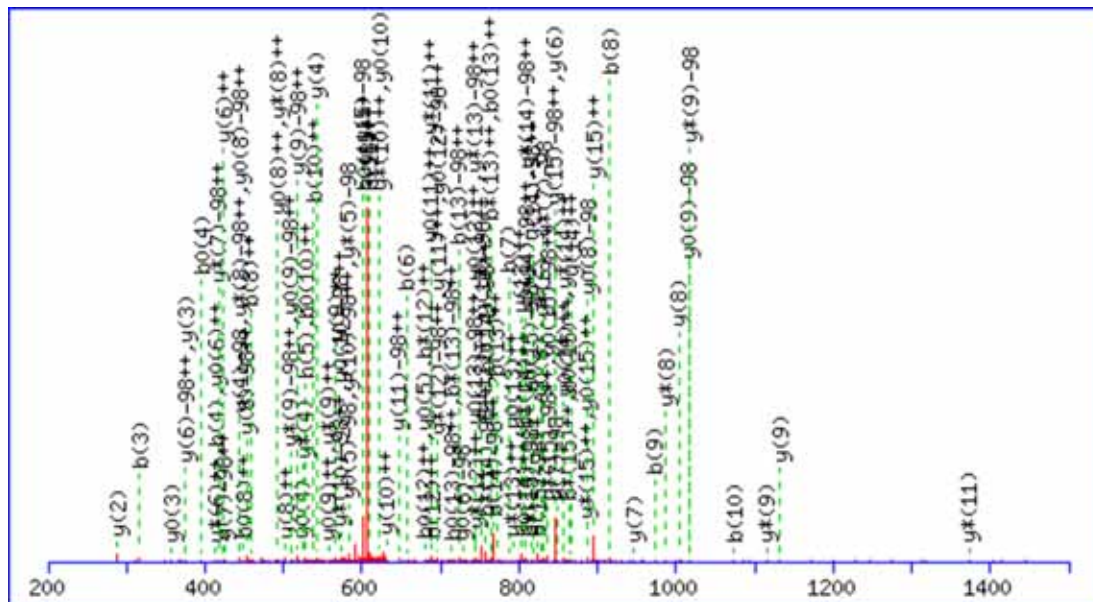

**Monoisotopic mass of neutral peptide Mr(calc):** 1916.8153

**Fixed modifications:** Carbamidomethyl (C) (apply to specified residues or termini only)

**Variable modifications:**

**N-term :** Dimethyl (N-term)

**S13 :** Phospho (ST), with neutral losses 97.9769(shown in table), 0.0000

**Ions Score:** 34 **Expect:** 0.014

**Matched b ions:** b(3), b(4), b(5), b(6), b(7), b(8), b(8)++, b(9), b(10), b(10)++, b(11)++, b(12)++, b(13)-98++, b(13)++, b(14)-98++, b(15)-98++

**Matched y ions:** y(2), y(3), y(4)-98, y(4), y(5)-98, y(6), y(6)-98++, y(6)++, y(7)-98++, y(7)-98, y(7), y(8)-98++, y(8), y(8)++, y(9)-98++, y(9), y(9)++, y(10)-98++, y(10)++, y(11)++, y(11)-98++, y(12)++, y(13)-98++, y(13)++, y(14)-98++, y(14)++, y(15)-98++, y(15)++

**Precursor origin neutral loss:** +

## Peptide No.1111

**TGEPDEEEGTFRSSIR**

**Confirmed sites:** @S:14

**Ambiguous sites:**

**MS/MS Fragmentation of TGEPDEEEGTFRSSIR**

Found in **PLM\_MOUSE**, Phospholemman OS=Mus musculus GN=Fxyd1 PE=1 SV=1

Match to Query 5154: 1916.814870 from(959.414711,2+)

Title: Elution from: 33.969 to 33.969 scan no 2846 cid35.00 polarity:+:MA10



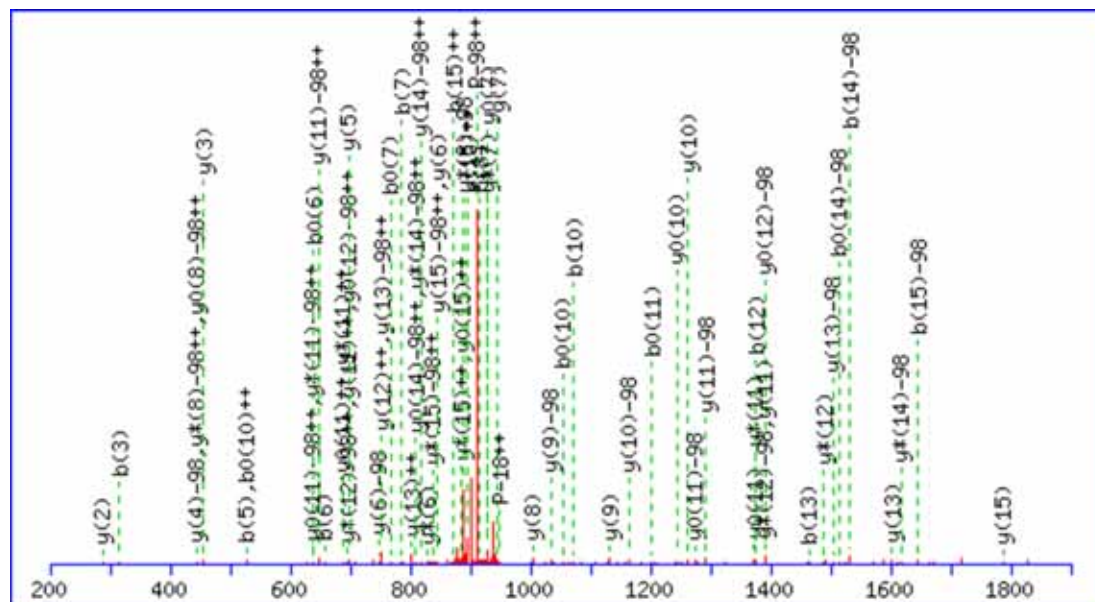

**Monoisotopic mass of neutral peptide Mr(calc):** 1916.8153

**Fixed modifications:** Carbamidomethyl (C) (apply to specified residues or termini only)

**Variable modifications:**

**N-term :** Dimethyl (N-term)

**S14 :** Phospho (ST), with neutral losses 0.0000(shown in table), 97.9769

**Ions Score:** 43 **Expect:** 0.0018

**Matched b ions:** b(3), b(5), b(6), b(7), b(8), b(10), b(12), b(13), b(14)-98, b(15)-98, b(15)++

**Matched y ions:** y(2), y(3), y(4)-98, y(5), y(6)-98, y(6), y(7), y(8), y(9), y(9)-98, y(10), y(10)-98,

y(11)-98++, y(11)-98, y(11), y(11)++, y(12)++, y(13)-98++, y(13), y(13)++, y(13)-98, y(14)-98++, y(15), y(15)++, y(15)-98++

**Precursor origin neutral loss:** +

## Peptide No.1112

**TGEPDEEEGTFRSSIR**

**Confirmed sites:** @S:14

**Ambiguous sites:**

**MS/MS Fragmentation of TGEPDEEEGTFRSSIR**

Found in **PLM\_MOUSE**, Phospholemman OS=Mus musculus GN=Fxyd1 PE=1 SV=1

Match to Query 4033: 1922.848032 from(962.431292,2+)

Title: Elution from: 33.353 to 33.353 scan no 2453 cid35.00 polarity:+:MA10:m1s

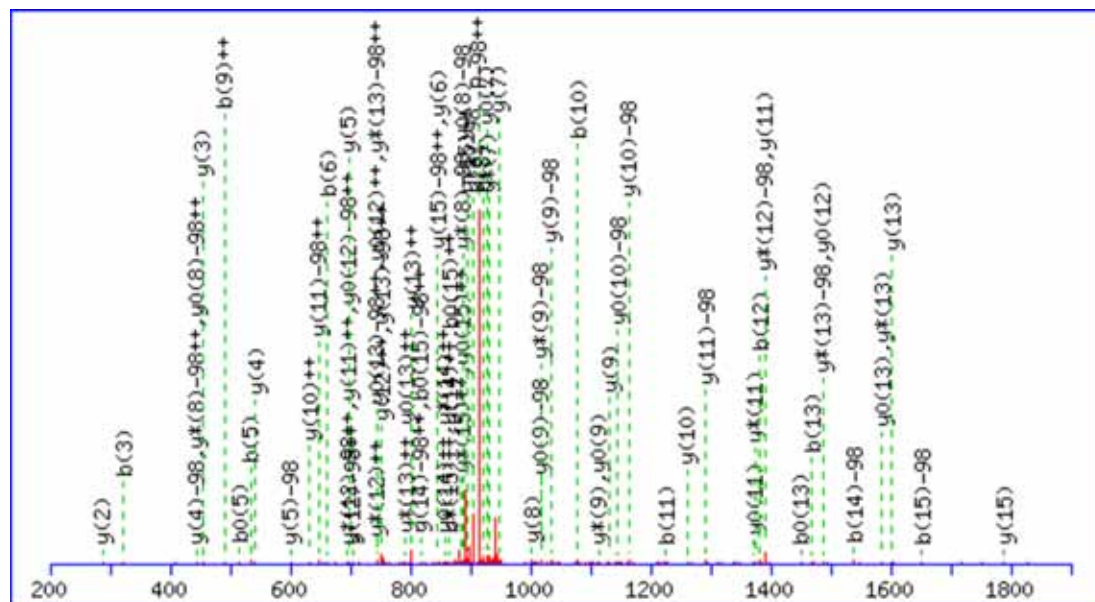

**Monoisotopic mass of neutral peptide Mr(calc):** 1922.8471

**Fixed modifications:** Carbamidomethyl (C) (apply to specified residues or termini only)

**Variable modifications:**

**N-term :** Dimethyl:2H(4)13C(2) (N-term)

**S14 :** Phospho (ST), with neutral losses 97.9769(shown in table), 0.0000

**Ions Score:** 37 **Expect:** 0.0085

**Matched b ions:** b(3), b(5), b(6), b(8), b(9)++, b(10), b(11), b(12), b(13), b(14)-98, b(15)-98

**Matched y ions:** y(2), y(3), y(4)-98, y(4), y(5)-98, y(5), y(6), y(7), y(8), y(8)-98, y(9)-98, y(9), y(10)-98, y(10), y(10)++, y(11)-98++, y(11)-98, y(11), y(11)++, y(12)++, y(12)-98++, y(13)-98++, y(13)++, y(13), y(14)-98++, y(14)++, y(15), y(15)-98++, y(15)++

**Precursor origin neutral loss:** +

## Peptide No.1113

**TLDQSPELR**

**Confirmed sites:** @S:5

**Ambiguous sites:**

MS/MS Fragmentation of **TLDQSPELR**

Found in **MTOR\_MOUSE**, Serine/threonine-protein kinase mTOR OS=Mus musculus GN=Mtor PE=1 SV=2

Match to Query 774: 1137.506950 from(569.760751,2+)

Title: Elution from: 47.591 to 47.591 scan no 4280 cid35.00 polarity:+:MA10

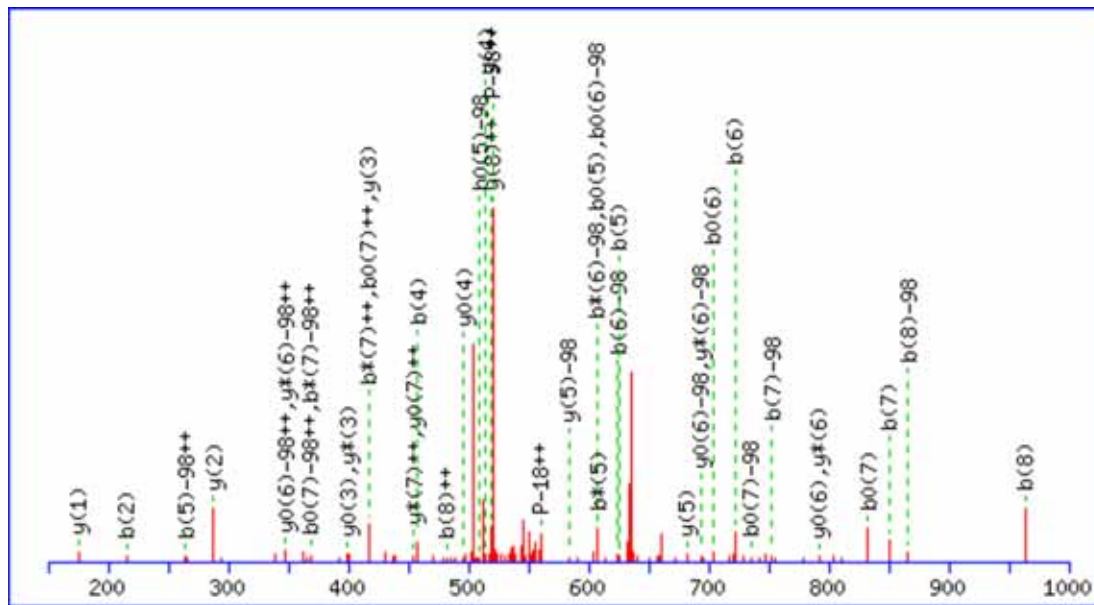

**Monoisotopic mass of neutral peptide Mr(calc): 1137.5067**

**Fixed modifications:** Carbamidomethyl (C) (apply to specified residues or termini only)

**Variable modifications:**

**S5 :** Phospho (ST), with neutral losses 0.0000(shown in table), 97.9769

**Ions Score: 28 Expect: 0.025**

**Matched b ions:** b(2), b(4), b(5)-98++, b(5), b(6), b(6)-98, b(7), b(7)-98, b(8), b(8)-98, b(8)++

**Matched y ions:** y(1), y(2), y(3), y(4), y(5), y(5)-98, y(8)++

**Precursor origin neutral loss:** +

## Peptide No.1114

**TLEDQVSELK**

**Confirmed sites:** @S:7

**Ambiguous sites:**

**MS/MS Fragmentation of TLEDQVSELK**

Found in **MYH1\_MOUSE**, Myosin-1 OS=Mus musculus GN=Myh1 PE=1 SV=1

Match to Query 1104: 1296.621778 from(649.318165,2+)

Title: Elution from: 39.854 to 39.854 scan no 3435 cid35.00 polarity:+:MA10

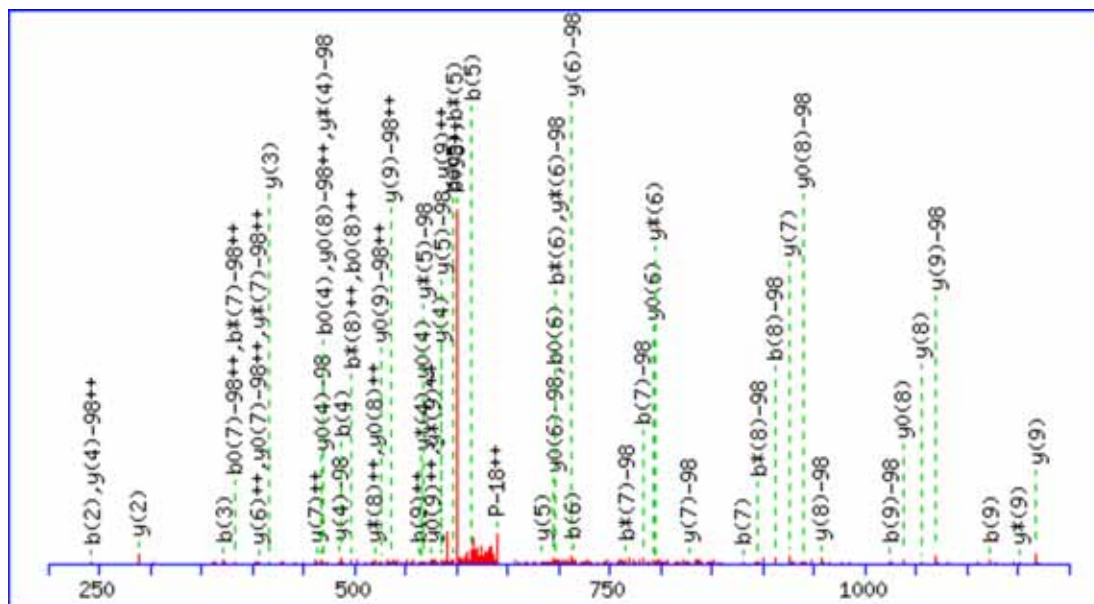

**Monoisotopic mass of neutral peptide Mr(calc):** 1296.6214

**Fixed modifications:** Carbamidomethyl (C) (apply to specified residues or termini only)

**Variable modifications:**

**N-term :** Dimethyl (N-term)

**S7 :** Phospho (ST), with neutral losses 97.9769(shown in table), 0.0000

**K10 :** Dimethyl (K)

**Ions Score:** 30 **Expect:** 0.038

**Matched b ions:** b(2), b(3), b(4), b(5), b(6), b(7)-98, b(7), b(8)-98, b(9), b(9)-98, b(9)++

**Matched y ions:** y(2), y(3), y(4)-98++, y(4)-98, y(4), y(5)-98, y(5), y(6)-98, y(6)++, y(7), y(7)++, y(7)-98, y(8)-98, y(8), y(9)-98, y(9), y(9)-98++, y(9)++

**Precursor origin neutral loss:** +

## Peptide No.1115

**TLPHSPGSAGEPQASQTVQVHR**

**Confirmed sites:** @S:5

**Ambiguous sites:**

MS/MS Fragmentation of **TLPHSPGSAGEPQASQTVQVHR**

Found in **MYOM3\_MOUSE**, Myomesin-3 OS=Mus musculus GN=Myom3 PE=2 SV=1

Match to Query 7269: 2391.133866 from(798.051898,3+)

Title: Elution from: 32.481 to 32.481 scan no 2644 cid35.00 polarity:+:MA10:m1s





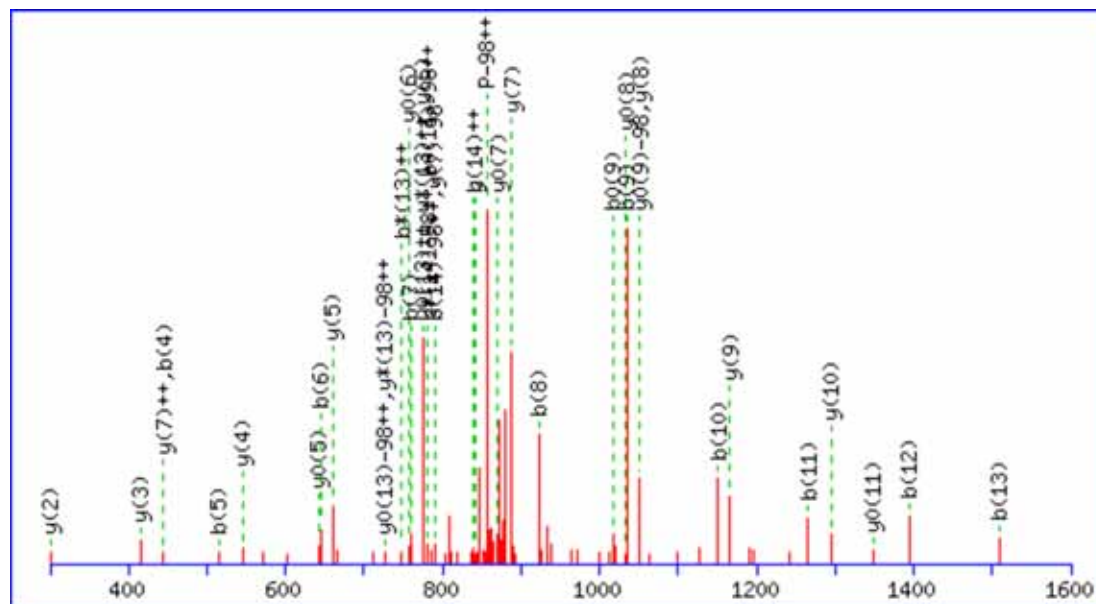

**Monoisotopic mass of neutral peptide Mr(calc):** 1808.6513

**Fixed modifications:** Carbamidomethyl (C) (apply to specified residues or termini only)

**Variable modifications:**

**N-term :** Dimethyl (N-term)

**S14 :** Phospho (ST), with neutral losses 0.0000(shown in table), 97.9769

**Ions Score:** 95 **Expect:** 3.8e-009

**Matched b ions:** b(4), b(5), b(6), b(7), b(8), b(9), b(10), b(11), b(12), b(13), b(14)-98++, b(14)++

**Matched y ions:** y(2), y(3), y(4), y(5), y(6), y(7)++, y(7), y(7)-98, y(8), y(9), y(10), y(14)++

**Precursor origin neutral loss:** +

## Peptide No.1117

**TLSNAEDYLDEEDSD**

**Confirmed sites:** @S:14

**Ambiguous sites:**

**MS/MS Fragmentation of** **TLSNAEDYLDEEDSD**

Found in **OSTF1\_MOUSE**, Osteoclast-stimulating factor 1 OS=Mus musculus GN=Ostf1 PE=1 SV=2

Match to Query 3496: 1814.686002 from(908.350277,2+)

Title: Elution from: 50.986 to 50.986 scan no 4793 cid35.00 polarity:+:MA10:m1s

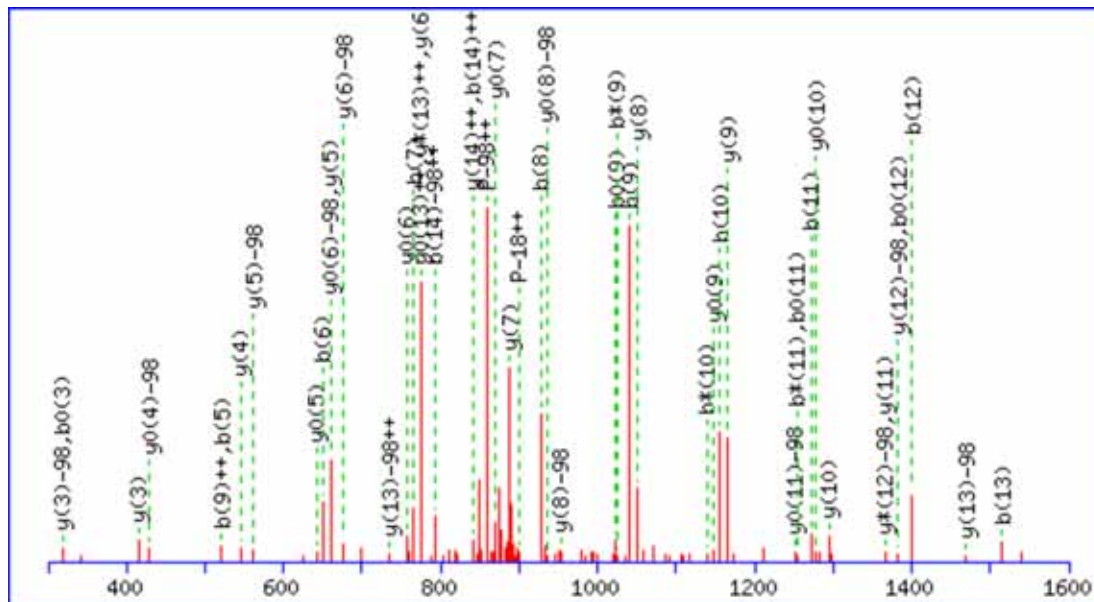

**Monoisotopic mass of neutral peptide Mr(calc):** 1814.6831

**Fixed modifications:** Carbamidomethyl (C) (apply to specified residues or termini only)

**Variable modifications:**

**N-term :** Dimethyl:2H(4)13C(2) (N-term)

**S14 :** Phospho (ST), with neutral losses 0.0000(shown in table), 97.9769

**Ions Score:** 79 **Expect:** 1.9e-007

**Matched b ions:** b(5), b(6), b(7), b(8), b(9)++, b(9), b(10), b(11), b(12), b(13), b(14)-98++, b(14)++

**Matched y ions:** y(3), y(3)-98, y(4), y(5), y(5)-98, y(6), y(6)-98, y(7), y(8), y(8)-98, y(9), y(10), y(11), y(12)-98, y(13)-98, y(13)-98++, y(14)++

**Precursor origin neutral loss:** +

## Peptide No.1118

**TLSPTPSAEGYQDVR**

**Confirmed sites:** @S:3

**Ambiguous sites:**

MS/MS Fragmentation of **TLSPTPSAEGYQDVR**

Found in **ABLM1\_MOUSE**, Actin-binding LIM protein 1 OS=Mus musculus GN=Ablim1 PE=1 SV=1

Match to Query 3009: 1727.777658 from(864.896105,2+)

Title: Elution from: 38.091 to 38.091 scan no 3217 cid35.00 polarity:+:MA10

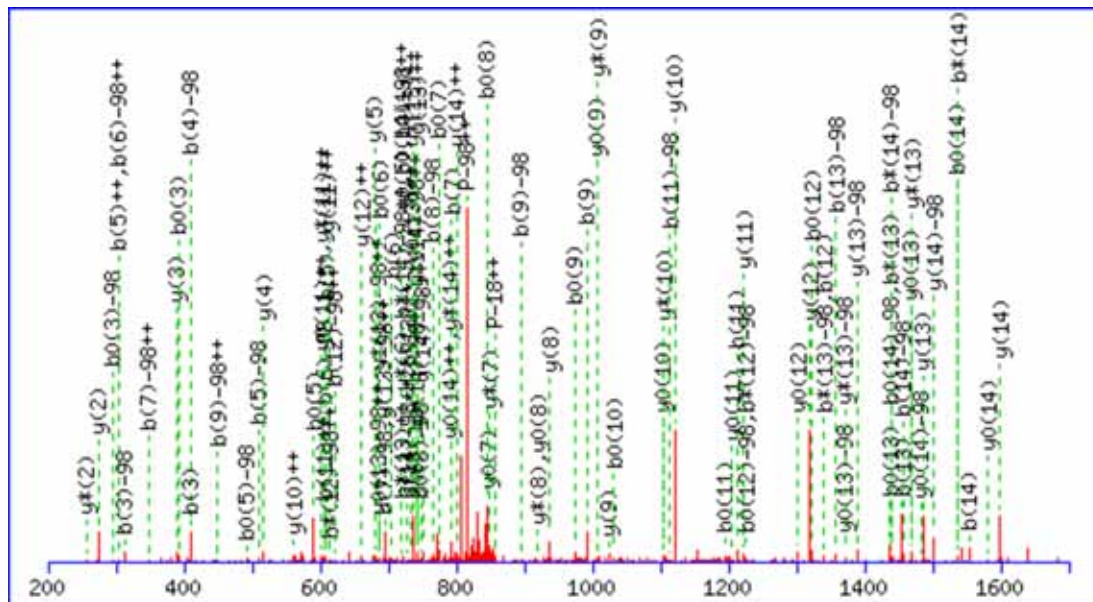

**Monoisotopic mass of neutral peptide Mr(calc): 1727.7767**

**Fixed modifications:** Carbamidomethyl (C) (apply to specified residues or termini only)

**Variable modifications:**

**N-term :** Dimethyl (N-term)

**S3 :** Phospho (ST), with neutral losses 0.0000(shown in table), 97.9769

**Ions Score:** 72 **Expect:** 2.6e-006

**Matched b ions:** b(3), b(3)-98, b(4)-98, b(5)-98, b(5), b(5)++, b(6)-98++, b(6)-98, b(6), b(7)-98, b(7)-98++, b(7), b(8)-98, b(9), b(9)-98++, b(9)-98, b(11), b(11)++, b(11)-98, b(12), b(12)-98++, b(13), b(13)-98, b(13)++, b(14), b(14)-98, b(14)-98++

**Matched y ions:** y(2), y(3), y(4), y(5), y(6), y(8), y(9), y(10), y(10)++, y(11), y(11)++, y(12), y(12)++, y(13), y(13)-98++, y(13)-98, y(13)++, y(14), y(14)-98, y(14)-98++, y(14)++

**Precursor origin neutral loss:** +

## Peptide No.1119

**TLSPTPSAEGYQDVR**

**Confirmed sites:** @S:3,@S:7

**Ambiguous sites:**

**MS/MS Fragmentation of TLSPTPSAEGYQDVR**

Found in **ABLM1\_MOUSE**, Actin-binding LIM protein 1 OS=Mus musculus GN=Ablim1 PE=1 SV=1

Match to Query 4384: 1807.743862 from(904.879207,2+)

Title: Elution from: 41.037 to 41.037 scan no 3802 cid35.00 polarity:+:MA10





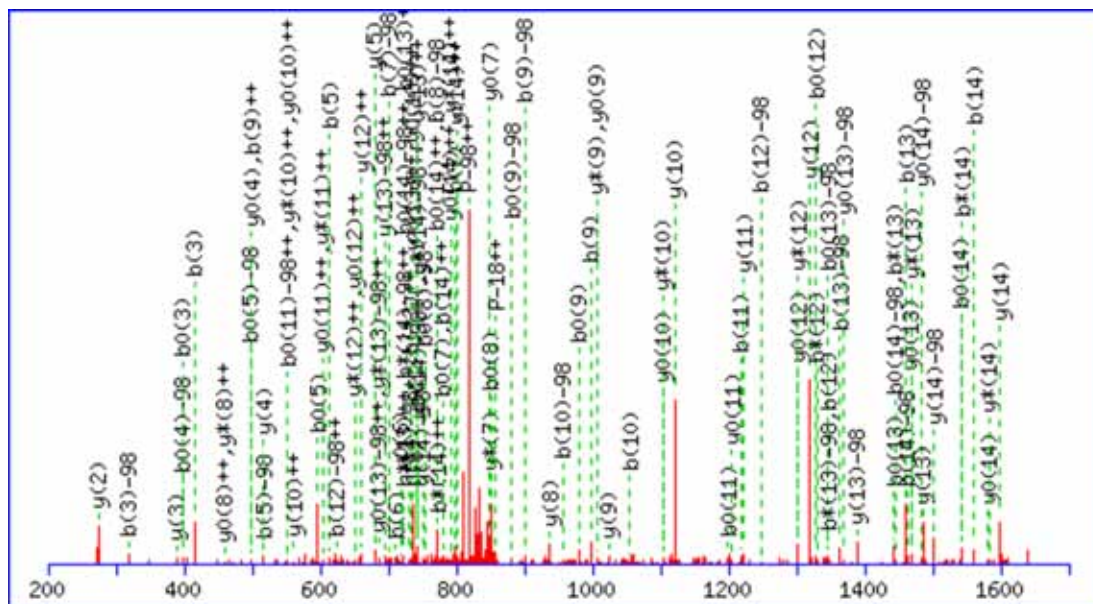

**Monoisotopic mass of neutral peptide Mr(calc):** 1733.8085

**Fixed modifications:** Carbamidomethyl (C) (apply to specified residues or termini only)

**Variable modifications:**

**N-term :** Dimethyl:2H(4)13C(2) (N-term)

**S3 :** Phospho (ST), with neutral losses 0.0000(shown in table), 97.9769

**Ions Score:** 85 **Expect:** 1.6e-007

**Matched b ions:** b(3), b(3)-98, b(5)-98, b(5), b(6), b(7)-98, b(7), b(8)-98, b(9), b(9)-98, b(9)++, b(10)-98, b(10), b(11), b(12)-98, b(12)-98++, b(12), b(13), b(13)-98, b(13)++, b(14), b(14)-98, b(14)-98++, b(14)++

**Matched y ions:** y(2), y(3), y(4), y(5), y(6), y(8), y(9), y(10), y(10)++, y(11), y(12), y(12)++, y(13), y(13)-98, y(13)++, y(13)-98++, y(14), y(14)-98, y(14)-98++, y(14)++

**Precursor origin neutral loss:** +

## Peptide No.1121

**TLSPTPSAEGYQDVR**

**Confirmed sites:** @S:3,@S:7

**Ambiguous sites:**

**MS/MS Fragmentation of** **TLSPTPSAEGYQDVR**

Found in **ABLM1\_MOUSE**, Actin-binding LIM protein 1 OS=Mus musculus GN=Ablim1 PE=1 SV=1

Match to Query 3093: 1813.776092 from(907.895322,2+)

Title: Elution from: 40.857 to 40.857 scan no 3473 cid35.00 polarity:+MA10

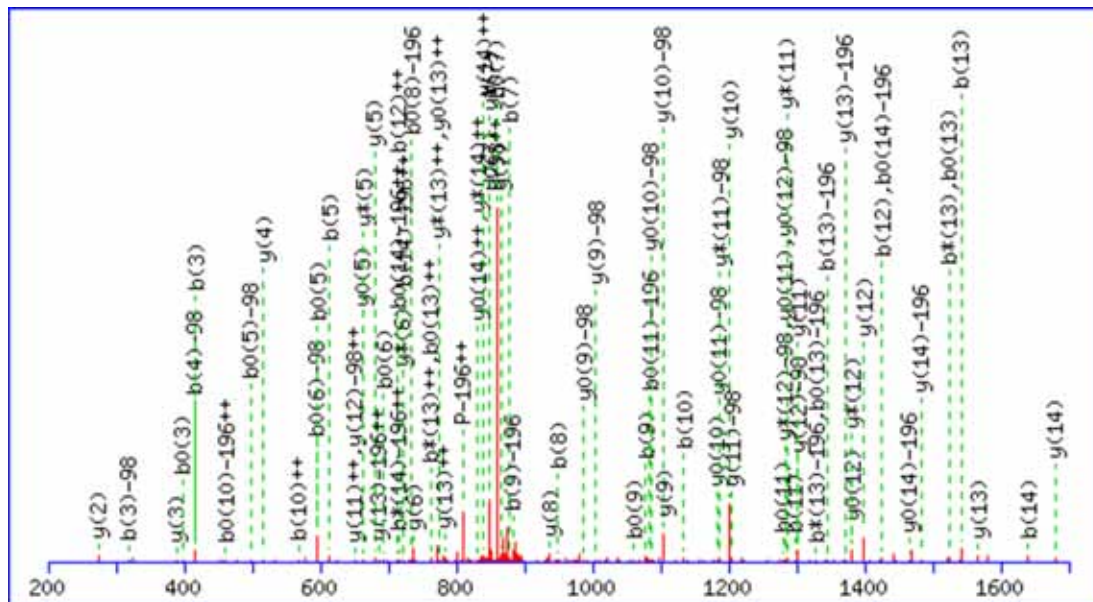

**Monoisotopic mass of neutral peptide Mr(calc):** 1813.7749

**Fixed modifications:** Carbamidomethyl (C) (apply to specified residues or termini only)

**Variable modifications:**

**N-term :** Dimethyl:2H(4)13C(2) (N-term)

**S3 :** Phospho (ST), with neutral losses 0.0000(shown in table), 97.9769

**S7 :** Phospho (ST), with neutral losses 0.0000(shown in table), 97.9769

**Ions Score:** 66 **Expect:** 8.8e-006

**Matched b ions:** b(3), b(3)-98, b(4)-98, b(5), b(7)-98, b(7), b(8)-98, b(8), b(9)-98, b(9), b(9)-196, b(10)-98, b(10)++, b(10), b(11)-98, b(11), b(12), b(12)-98, b(12)++, b(13), b(13)-98, b(13)-196, b(14)-98++, b(14), b(14)-98, b(14)-196++

**Matched y ions:** y(2), y(3), y(4), y(5), y(6), y(7), y(8), y(9), y(9)-98, y(10)-98, y(10), y(11), y(11)-98, y(11)++, y(12)-98, y(12), y(12)-98++, y(13), y(13)-98, y(13)-196, y(13)-196++, y(13)-98++, y(13)++, y(14), y(14)-98, y(14)-196, y(14)++

**Precursor origin neutral loss:** +

## Peptide No.1122

**TLSPTPSAEGYQDVR**

**Confirmed sites:** @S:3,@Y:11

**Ambiguous sites:**

MS/MS Fragmentation of **TLSPTPSAEGYQDVR**

Found in **ABLM1\_MOUSE**, Actin-binding LIM protein 1 OS=Mus musculus GN=Ablm1 PE=1 SV=1

Match to Query 3094: 1813.776232 from(907.895392,2+)

Title: Elution from: 40.518 to 40.518 scan no 3429 cid35.00 polarity:+:MA10





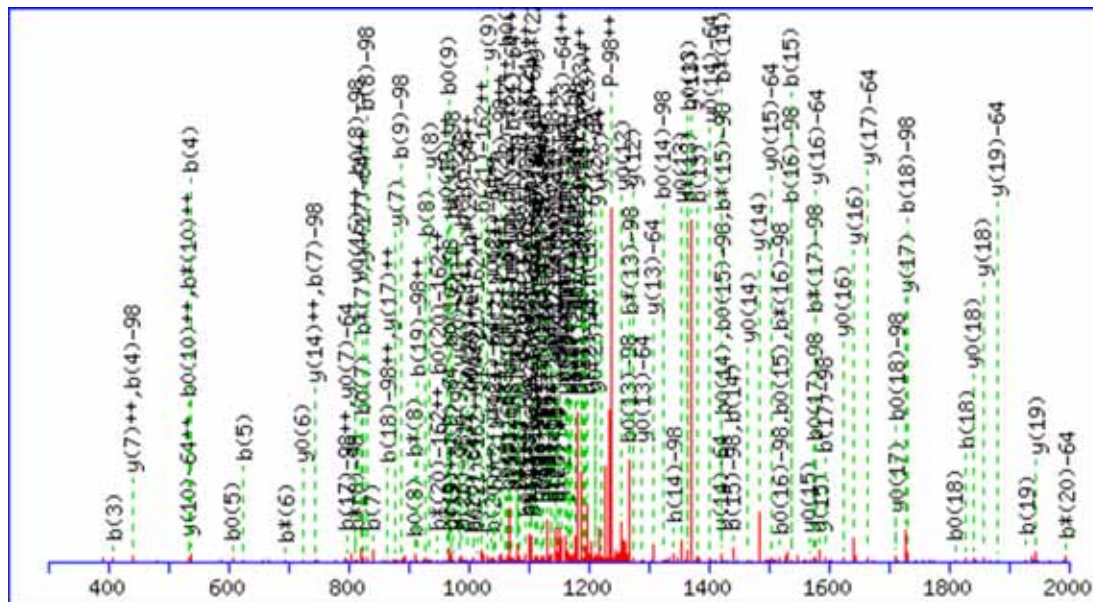

**Monoisotopic mass of neutral peptide Mr(calc):** 2569.0714

**Fixed modifications:** Carbamidomethyl (C) (apply to specified residues or termini only)

**Variable modifications:**

**N-term :** Dimethyl (N-term)

**S3 :** Phospho (ST), with neutral losses 0.0000(shown in table), 97.9769

**M20 :** Oxidation (M), with neutral losses 0.0000(shown in table), 63.9983

**Ions Score:** 46 **Expect:** 0.0014

**Matched b ions:** b(3), b(4)-98, b(4), b(5), b(7), b(7)-98, b(8)-98, b(8), b(9), b(9)-98, b(10)-98, b(10), b(11), b(11)-98, b(12)-98, b(13), b(14), b(14)-98, b(15)-98, b(15), b(16)-98, b(17)-98, b(17)-98++, b(18)-98, b(18), b(18)-98++, b(19), b(19)-98++, b(20)-98++, b(20)++, b(21)-98++, b(21)++, b(22)++, b(22)-98++, b(23)-98++, b(23)++

**Matched y ions:** y(7)++, y(7), y(8), y(9), y(10), y(11), y(12), y(13), y(14), y(14)++, y(15), y(16), y(17), y(17)++, y(18), y(19), y(19)++, y(21)++, y(22)-98++, y(22)++, y(23)-98++, y(23)++

**Precursor origin neutral loss:** +

## Peptide No.1124

**TLSQSSESGTLPSGPPGHTMEVSC**

**Confirmed sites:** @S:3

**Ambiguous sites:** @S:5orS:6

MS/MS Fragmentation of **TLSQSSESGTLPSGPPGHTMEVSC**

Found in **NDRG2\_MOUSE**, Protein NDRG2 OS=Mus musculus GN=Ndr2 PE=1 SV=1

Match to Query 6754: 2649.039264 from(884.020364,3+)

Title: Elution from: 42.276 to 42.276 scan no 3744 cid35.00 polarity:+:MA10:m1s

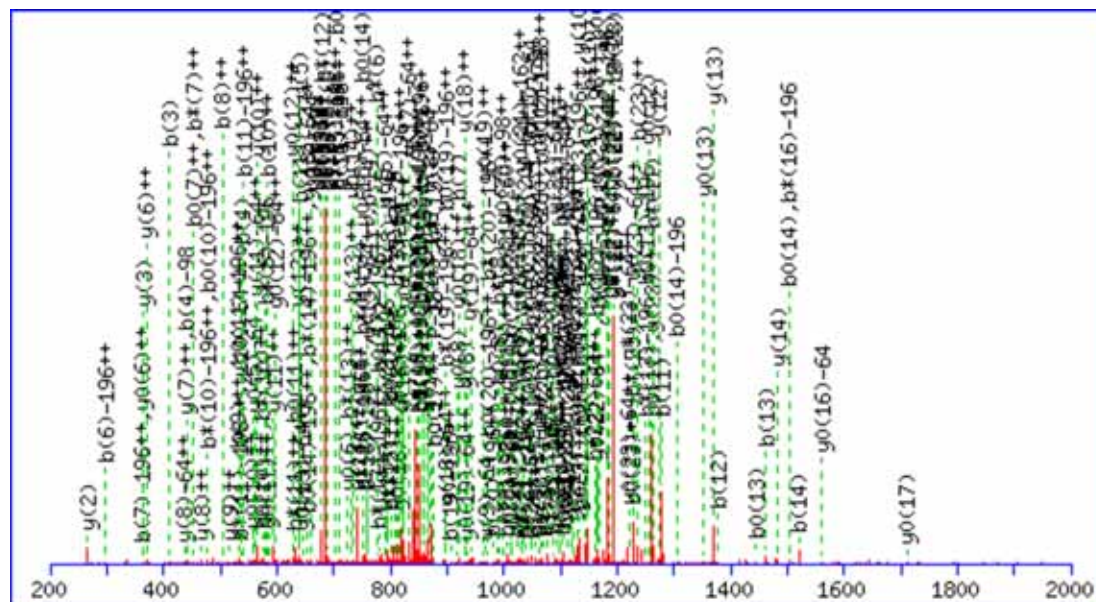

**Monoisotopic mass of neutral peptide Mr(calc):** 2649.0377

**Fixed modifications:** Carbamidomethyl (C) (apply to specified residues or termini only)

**Variable modifications:**

**N-term :** Dimethyl (N-term)

**S3 :** Phospho (ST), with neutral losses 0.0000(shown in table), 97.9769

**S5 :** Phospho (ST), with neutral losses 0.0000(shown in table), 97.9769

**M20 :** Oxidation (M), with neutral losses 0.0000(shown in table), 63.9983

**Ions Score:** 44 **Expect:** 0.0018

**Matched b ions:** b(3), b(4)-98, b(4), b(6)-196++, b(6)-98, b(7), b(7)-98++, b(7)-196++, b(7)-98, b(8), b(8)-196, b(8)++, b(9), b(9)-196, b(9)++, b(10)-98++, b(10)++, b(10), b(11), b(11)++, b(11)-98++, b(11)-196++, b(11)-98, b(12)-98, b(12)-98++, b(12)++, b(12), b(12)-196, b(13), b(13)-98, b(13)++, b(14), b(14)++, b(14)-98++, b(15)-98, b(15)-98++, b(15)-196++, b(15)++, b(16)-196++, b(16)-98++, b(16)++, b(17)-98++, b(18)-196++, b(19)++, b(19)-196++, b(20)++, b(20)-196++, b(20)-98++, b(21)++, b(21)-98++, b(22)++, b(22)-98++, b(22)-196++, b(23)++, b(23)-98++

**Matched y ions:** y(2), y(3), y(5), y(6)++, y(6), y(7)++, y(8)++, y(8), y(9), y(9)++, y(10)++, y(10), y(11)++, y(11), y(12), y(12)++, y(13)++, y(13), y(14)++, y(14), y(15)++, y(16)++, y(17)++, y(18)++, y(20)-98++, y(20)++, y(21)++, y(22)-196++, y(23)++, y(23)-196++, y(23)-98++

**Precursor origin neutral loss:** +

## Peptide No.1125

**TLSQSSESGTLPSPGPPGHTMEVSC**

**Confirmed sites:** @S:5

**Ambiguous sites:**

MS/MS Fragmentation of **TLSQSSESGTLPSPGPPGHTMEVSC**

Found in **NDRG2\_MOUSE**, Protein NDRG2 OS=Mus musculus GN=NdrG2 PE=1 SV=1

Match to Query 6554: 2569.071532 from(1285.543042,2+)

Title: Elution from: 39.014 to 39.014 scan no 3320 cid35.00 polarity:+:MA10:m1s

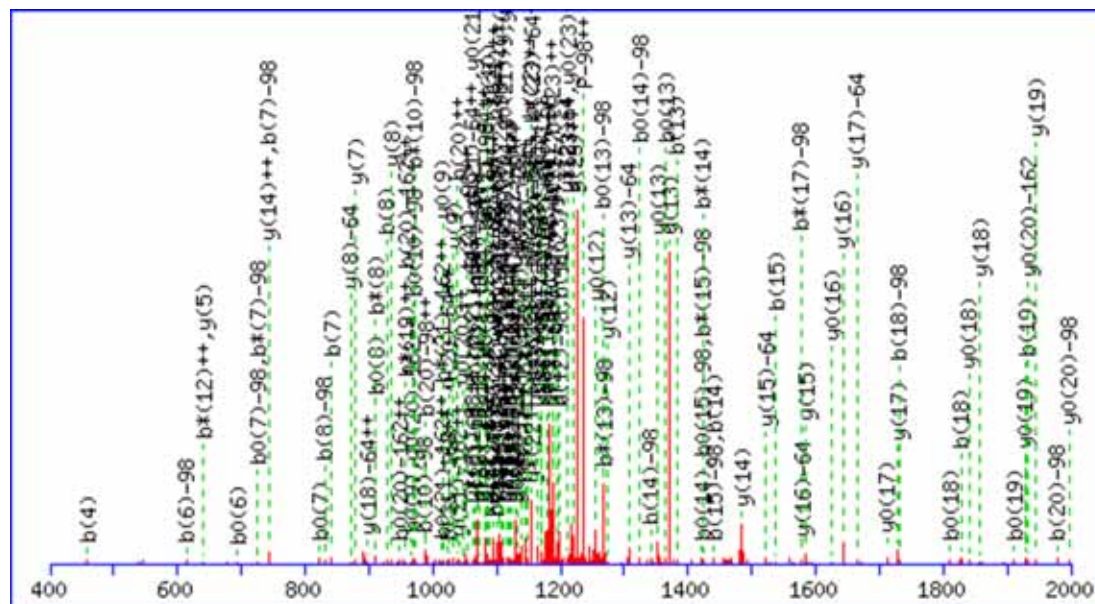

**Monoisotopic mass of neutral peptide Mr(calc):** 2569.0714

**Fixed modifications:** Carbamidomethyl (C) (apply to specified residues or termini only)

**Variable modifications:**

**N-term :** Dimethyl (N-term)

**S5 :** Phospho (ST), with neutral losses 97.9769(shown in table), 0.0000

**M20 :** Oxidation (M), with neutral losses 0.0000(shown in table), 63.9983

**Ions Score:** 60 **Expect:** 6e-005

**Matched b ions:** b(4), b(6)-98, b(7)-98, b(7), b(8)-98, b(8), b(10)-98, b(10), b(11)-98, b(11), b(12)-98, b(13), b(14), b(14)-98, b(15)-98, b(15), b(18), b(18)-98, b(19), b(20)-98++, b(20)-98, b(20)++, b(21)++, b(21)-98++, b(22)++, b(22)-98++, b(23)-98++, b(23)++

**Matched y ions:** y(5), y(7), y(8), y(9), y(10), y(11), y(12), y(13), y(14)++, y(14), y(15), y(16), y(17), y(18), y(19), y(21)-98++, y(21)++, y(22)-98++, y(22)++, y(23)-98++, y(23)++

**Precursor origin neutral loss:** +

## Peptide No.1126

**TLSQSSESGTLPSPGPPGHTMEVSC**

**Confirmed sites:** @S:5,@S:6

**Ambiguous sites:**

MS/MS Fragmentation of **TLSQSSESGTLPSPGPPGHTMEVSC**

Found in **NDRG2\_MOUSE**, Protein NDRG2 OS=Mus musculus GN=Ndr2 PE=1 SV=1

Match to Query 7111: 2649.038408 from(1325.526480,2







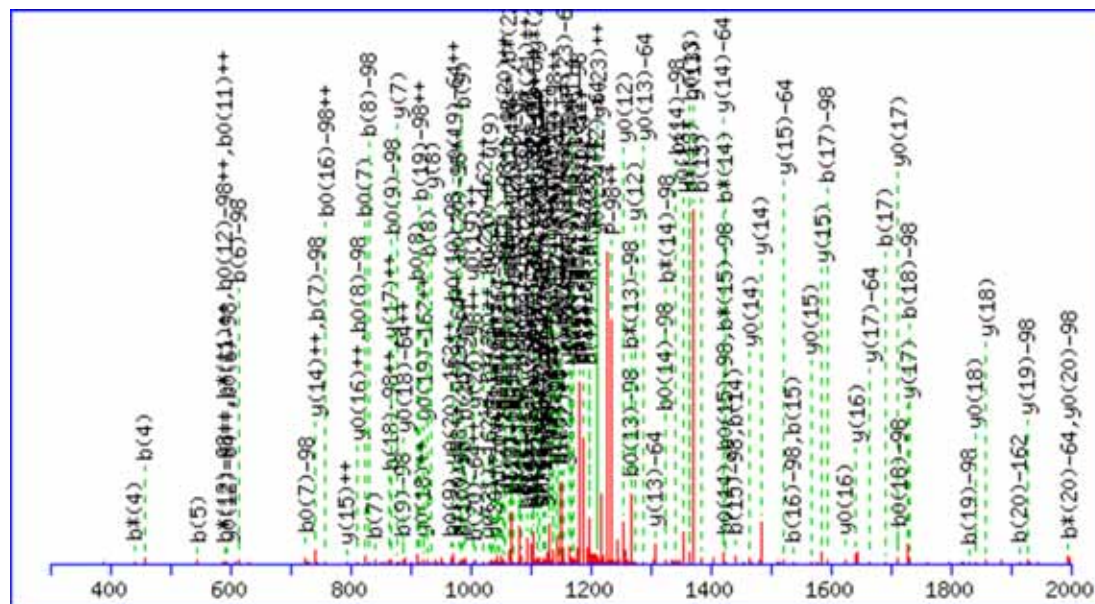

**Monoisotopic mass of neutral peptide Mr(calc):** 2569.0714

**Fixed modifications:** Carbamidomethyl (C) (apply to specified residues or termini only)

**Variable modifications:**

**N-term :** Dimethyl (N-term)

**S6 :** Phospho (ST), with neutral losses 97.9769(shown in table), 0.0000

**M20 :** Oxidation (M), with neutral losses 0.0000(shown in table), 63.9983

**Ions Score:** 70 **Expect:** 5.3e-006

**Matched b ions:** b(4), b(5), b(6)-98, b(7)-98, b(7), b(8)-98, b(8), b(9)-98, b(9), b(10), b(10)-98, b(11), b(11)-98, b(12)-98, b(13), b(14), b(14)-98, b(15)-98, b(15), b(16)-98, b(17)-98, b(17), b(18)-98, b(18)-98++, b(19)-98, b(19)-98++, b(20)-98++, b(20)++, b(21)-98++, b(21)++, b(22)++, b(22)-98++, b(23)-98++, b(23)++

**Matched y ions:** y(7), y(8), y(9), y(10), y(11), y(12), y(13), y(14)++, y(14), y(15), y(15)++, y(16), y(17), y(17)++, y(18), y(19)-98, y(20)-98++, y(20)++, y(21)-98++, y(21)++, y(22)-98++, y(22)++, y(23)-98++

**Precursor origin neutral loss:** +

## Peptide No.1128

**TLSQSSESGTLPSGPPGHTMEVSC**

**Confirmed sites:** @T:1

**Ambiguous sites:**

MS/MS Fragmentation of **TLSQSSESGTLPSGPPGHTMEVSC**

Found in **NDRG2\_MOUSE**, Protein NDRG2 OS=Mus musculus GN=Ndr2 PE=1 SV=1

Match to Query 6823: 2569.072094 from(1285.543323,2+)

Title: Elution from: 39.244 to 39.244 scan no 3370 cid35.00 polarity:+:MA10:m1s

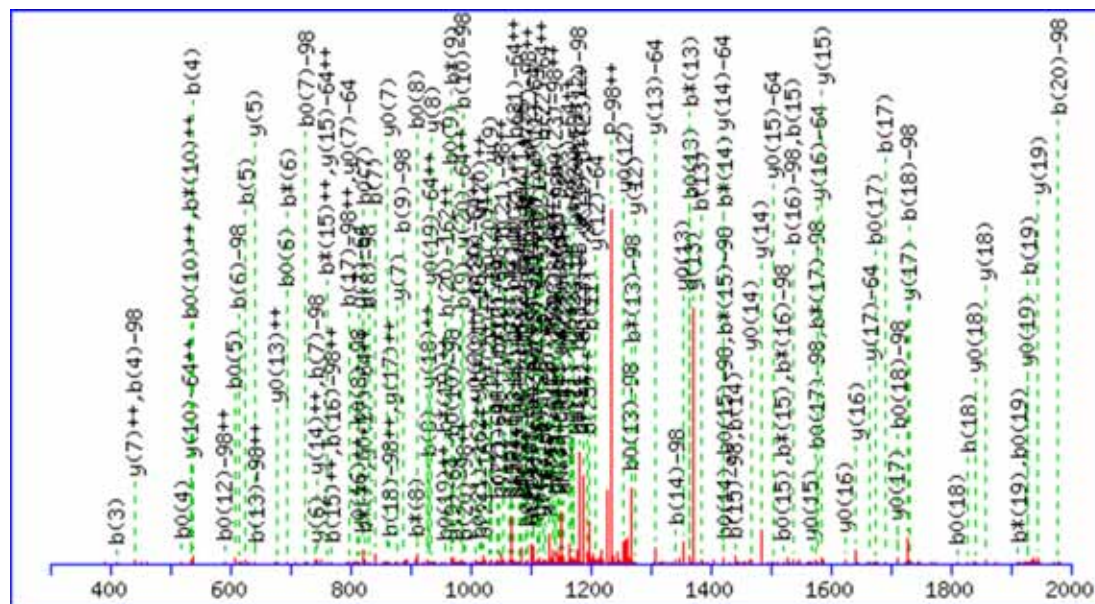

**Monoisotopic mass of neutral peptide Mr(calc):** 2569.0714

**Fixed modifications:** Carbamidomethyl (C) (apply to specified residues or termini only)

**Variable modifications:**

**N-term :** Dimethyl (N-term)

**T1 :** Phospho (ST), with neutral losses 0.0000(shown in table), 97.9769

**M20 :** Oxidation (M), with neutral losses 0.0000(shown in table), 63.9983

**Ions Score:** 66 **Expect:** 1.5e-005

**Matched b ions:** b(3), b(4)-98, b(4), b(5), b(6)-98, b(7)-98, b(7), b(8), b(8)-98, b(9)-98, b(9), b(10), b(10)-98, b(11), b(11)-98, b(13)-98++, b(13), b(14), b(14)-98, b(15)-98, b(15)++, b(15), b(16)-98++, b(16)-98, b(17), b(17)-98++, b(18)-98, b(18), b(18)-98++, b(19), b(20)-98++, b(20)-98, b(21)++, b(21)-98++, b(22)++, b(22)-98++, b(23)-98++, b(23)++

**Matched y ions:** y(5), y(6), y(7)++, y(7), y(8), y(9), y(10), y(11), y(12), y(13), y(14)++, y(14), y(15), y(16), y(17), y(17)++, y(18), y(18)++, y(19), y(20)++, y(21)++, y(23)++

**Precursor origin neutral loss:** +

## Peptide No.1129

**TLSQSSESGTLPSGPPGHTMEVSC**

**Confirmed sites: @S:3**

**Ambiguous sites:**

MS/MS Fragmentation of **TLSQSSESGTLPSGPPGHTMEVSC**

Found in **NDRG2\_MOUSE**, Protein NDRG2 OS=Mus musculus GN=Ndr2 PE=1 SV=1

Match to Query 6203: 2553.077606 from(1277.546079,2+)

Title: Elution from: 44.462 to 44.462 scan no 3928 cid35.00 polarity:+:MA10:m1s

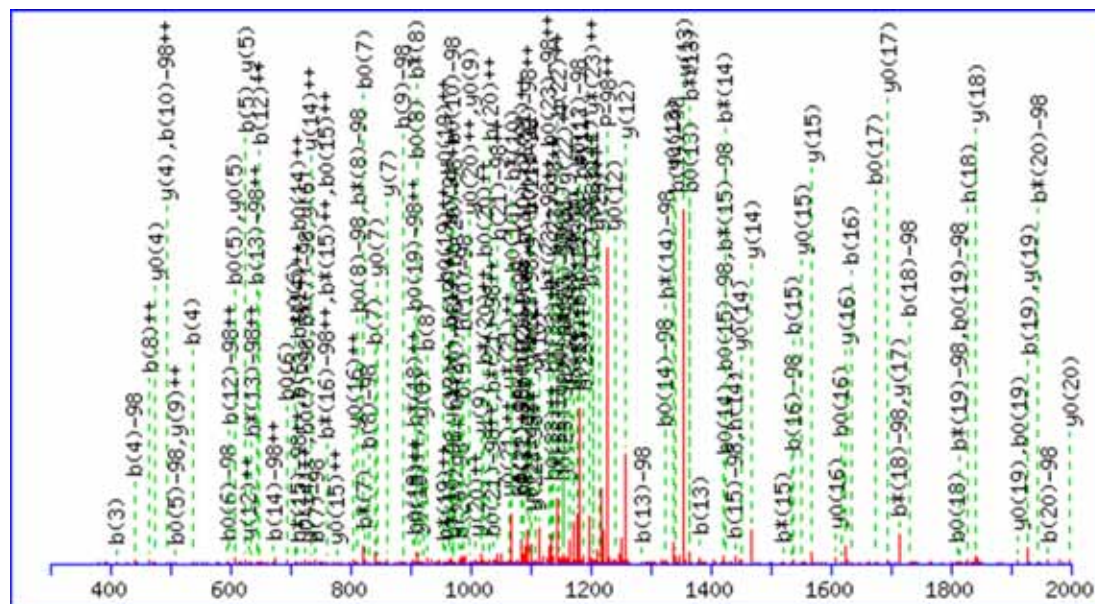

**Monoisotopic mass of neutral peptide Mr(calc):** 2553.0764

**Fixed modifications:** Carbamidomethyl (C) (apply to specified residues or termini only)

**Variable modifications:**

**N-term :** Dimethyl (N-term)

**S3 :** Phospho (ST), with neutral losses 0.0000(shown in table), 97.9769

**Ions Score:** 83 **Expect:** 3.2e-007

**Matched b ions:** b(3), b(4)-98, b(4), b(5), b(6), b(7)-98, b(7), b(8)++, b(8), b(8)-98, b(9), b(9)-98, b(10)-98++, b(10)-98, b(10), b(11), b(11)-98, b(12)-98, b(12)-98++, b(12)++, b(13), b(13)-98++, b(13)-98, b(14), b(14)-98, b(14)-98++, b(15)-98, b(15), b(16)-98, b(16), b(18), b(18)-98, b(19), b(19)++, b(20)-98, b(20)-98++, b(20)++, b(21)-98++, b(21)++, b(22)++, b(22)-98++, b(23)++, b(23)-98++  
**Matched y ions:** y(4), y(5), y(6), y(7), y(8), y(9)++, y(9), y(10), y(11), y(12)++, y(12), y(13), y(14), y(14)++, y(15), y(16), y(17), y(18), y(19), y(19)++, y(20)++, y(22)-98++, y(22)++, y(23)-98++, y(23)++  
**Precursor origin neutral loss:** +

## Peptide No.1130

**TLSQSSESGTLPSPGPPGHTMEVSC**

**Confirmed sites:** @S:3,@S:5

**Ambiguous sites:**

**MS/MS Fragmentation of TLSQSSESGTLPSPGPPGHTMEVSC**

Found in **NDRG2\_MOUSE**, Protein NDRG2 OS=Mus musculus GN=Ndr2 PE=1 SV=1

Match to Query 8407: 2633.043474 from(1317.529013,2+)

Title: Elution from: 48.064 to 48.064 scan no 4713 cid35.00 polarity:+:MA10:m1s







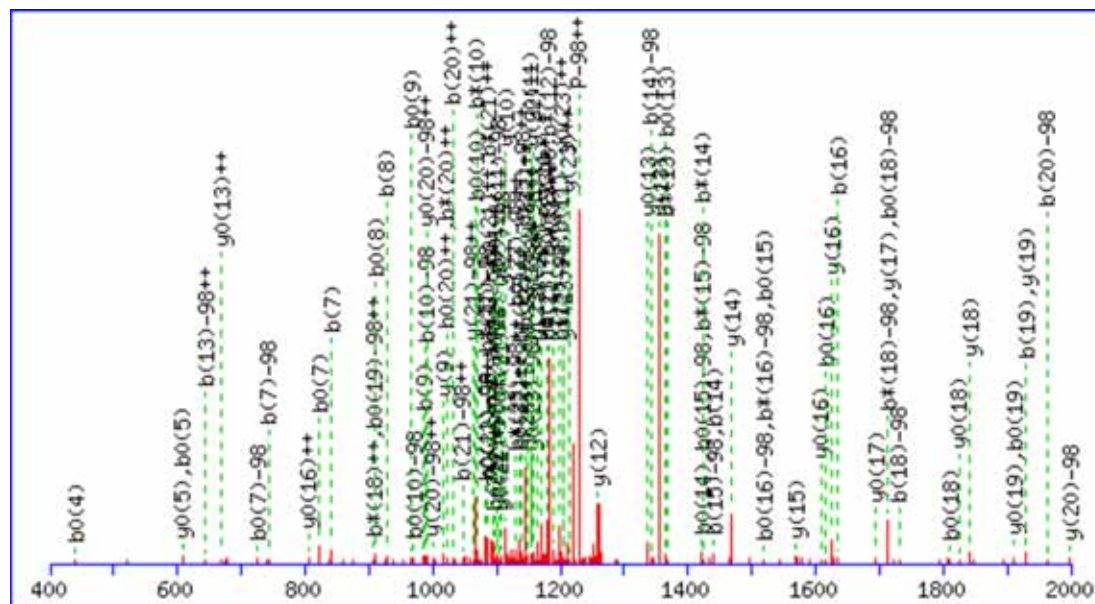

**Monoisotopic mass of neutral peptide Mr(calc):** 2553.0764

**Fixed modifications:** Carbamidomethyl (C) (apply to specified residues or termini only)

**Variable modifications:**

**N-term :** Dimethyl (N-term)

**S5 :** Phospho (ST), with neutral losses 97.9769(shown in table), 0.0000

**Ions Score:** 69 **Expect:** 7.3e-006

**Matched b ions:** b(7), b(7)-98, b(8), b(9), b(10)-98, b(10), b(11), b(11)-98, b(12)-98, b(13)-98++, b(14), b(14)-98, b(15)-98, b(16), b(18)-98, b(19), b(20)-98, b(20)++, b(21)++, b(21)-98++, b(22)++, b(22)-98++, b(23)-98++, b(23)++

**Matched y ions:** y(9), y(10), y(11), y(12), y(13), y(14), y(15), y(16), y(17), y(18), y(19), y(20)-98, y(20)-98++, y(21)-98++, y(22)-98++, y(22)++, y(23)-98++, y(23)++

**Precursor origin neutral loss:** +

## Peptide No.1132

**TLSQSSESGTLPSGPPGHTMEVSC**

**Confirmed sites:** @S:5,@S:6

**Ambiguous sites:**

**MS/MS Fragmentation of** **TLSQSSESGTLPSGPPGHTMEVSC**

Found in **NDRG2\_MOUSE**, Protein NDRG2 OS=Mus musculus GN=Ndr2 PE=1 SV=1

Match to Query 6418: 2633.041318 from(1317.527935,2+)

Title: Elution from: 48.221 to 48.221 scan no 4385 cid35.00 polarity:+:MA10:m1s

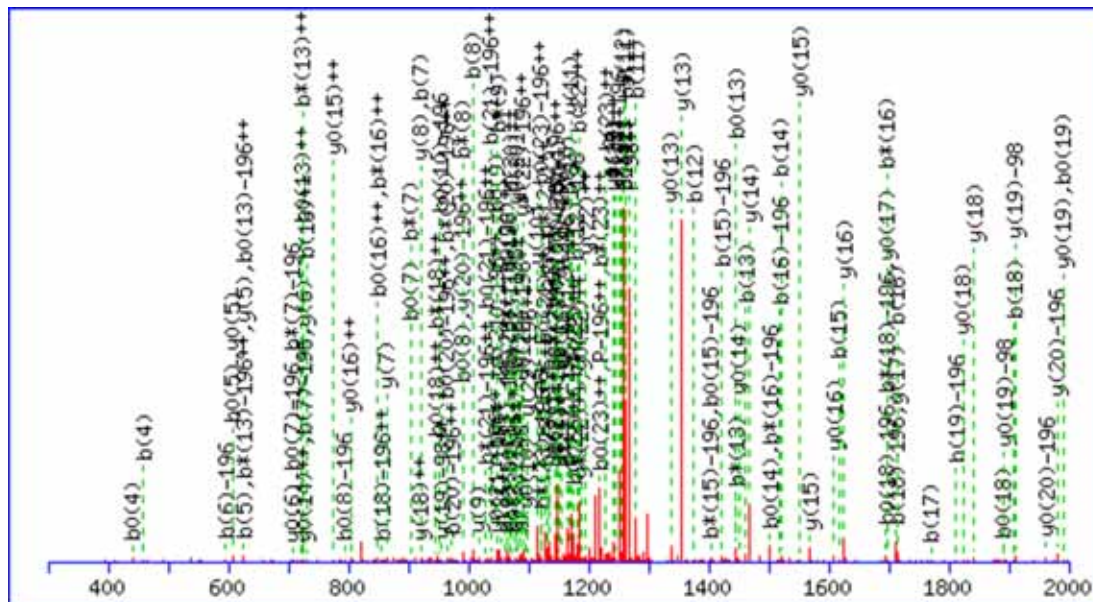

**Monoisotopic mass of neutral peptide Mr(calc):** 2633.0428

**Fixed modifications:** Carbamidomethyl (C) (apply to specified residues or termini only)

**Variable modifications:**

**N-term :** Dimethyl (N-term)

**S5 :** Phospho (ST), with neutral losses 97.9769(shown in table), 0.0000

**S6 :** Phospho (ST), with neutral losses 97.9769(shown in table), 0.0000

**Ions Score:** 68 **Expect:** 6e-006

**Matched b ions:** b(4), b(5), b(6)-196, b(7)-98, b(7)-196, b(7), b(8), b(8)-98, b(9), b(9)-98, b(10)-98, b(10), b(11), b(11)-98, b(12)-98, b(12), b(12)-196, b(13), b(13)++, b(13)-98, b(14), b(14)-98, b(15)-98, b(15)-196, b(15), b(16), b(16)-196, b(17), b(18)-196, b(18)-98, b(18)-196++, b(18)-98++, b(18), b(19)-98, b(19)-196, b(19)-98++, b(20)-196++, b(20)++, b(21)-98++, b(21)++, b(21)-196++, b(22)++, b(22)-196++, b(22)-98++, b(23)-196++, b(23)-98++, b(23)++

**Matched y ions:** y(5), y(6), y(7), y(8), y(9), y(10), y(11), y(12), y(13), y(14), y(15), y(16), y(17), y(18), y(18)++, y(19)-98, y(19)-98++, y(20)-196++, y(20)-196, y(20)-98++, y(21)-196++, y(21)-98++, y(21)++, y(22)-98++, y(22)-196++, y(22)++, y(23)-196++, y(23)-98++, y(23)++

**Precursor origin neutral loss:** +

## Peptide No.1133

**TLSQSSESGTLPSGPPGHTMEVSC**

**Confirmed sites:** @S:6

**Ambiguous sites:**

MS/MS Fragmentation of **TLSQSSESGTLPSGPPGHTMEVSC**

Found in **NDRG2\_MOUSE**, Protein NDRG2 OS=Mus musculus GN=Ndr2 PE=1 SV=1

Match to Query 7740: 2553.078654 from(1277.546603,2+)

Title: Elution from: 44.235 to 44.235 scan no 4209 cid35.00 polarity:+:MA10:m1s

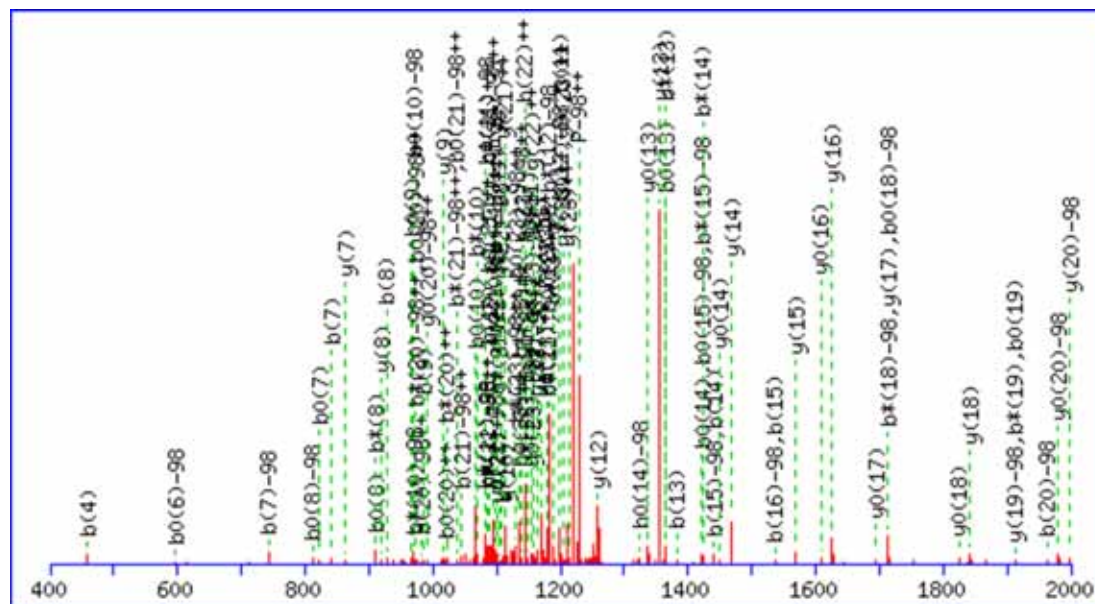

**Monoisotopic mass of neutral peptide Mr(calc):** 2553.0764

**Fixed modifications:** Carbamidomethyl (C) (apply to specified residues or termini only)

**Variable modifications:**

**N-term :** Dimethyl (N-term)

**S6 :** Phospho (ST), with neutral losses 97.9769(shown in table), 0.0000

**Ions Score:** 75 **Expect:** 2.1e-006

**Matched b ions:** b(4), b(7)-98, b(7), b(8), b(9), b(10), b(11), b(11)-98, b(12)-98, b(13), b(14), b(15)-98, b(15), b(16)-98, b(20)-98, b(20)-98++, b(21)-98++, b(21)++, b(22)++, b(22)-98++, b(23)-98++, b(23)++

**Matched y ions:** y(7), y(8), y(9), y(10), y(11), y(12), y(13), y(14), y(15), y(16), y(17), y(18), y(19)-98, y(20)-98, y(21)++, y(22)-98++, y(22)++, y(23)-98++, y(23)++

**Precursor origin neutral loss:** +

## Peptide No.1134

**TLSQSSESGTLPSGPPGHTMEVSC**

**Confirmed sites:** @S:6,@S:8

**Ambiguous sites:**

MS/MS Fragmentation of **TLSQSSESGTLPSGPPGHTMEVSC**

Found in **NDRG2\_MOUSE**, Protein NDRG2 OS=Mus musculus GN=Ndr2 PE=1 SV=1

Match to Query 6724: 2633.044155 from(878.688661,3+)

Title: Elution from: 48.194 to 48.194 scan no 4469 cid35.00 polarity:+:MA10:m1s

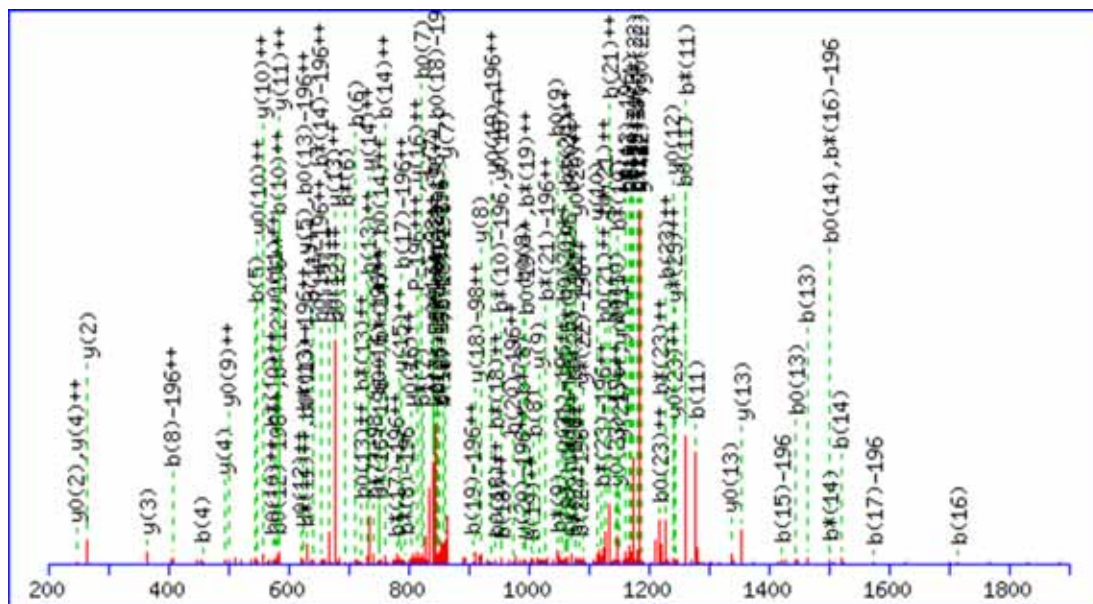

**Monoisotopic mass of neutral peptide Mr(calc):** 2633.0428

**Fixed modifications:** Carbamidomethyl (C) (apply to specified residues or termini only)

**Variable modifications:**

**N-term :** Dimethyl (N-term)

**S6 :** Phospho (ST), with neutral losses 0.0000(shown in table), 97.9769

**S8 :** Phospho (ST), with neutral losses 0.0000(shown in table), 97.9769

**Ions Score:** 43 **Expect:** 0.0021

**Matched b ions:** b(4), b(5), b(6), b(7)-98, b(7), b(8)-196++, b(8)-98++, b(8), b(9), b(10)++, b(10), b(11), b(11)++, b(11)-98, b(12)-98, b(12)-98++, b(12)-196, b(13), b(13)++, b(13)-98++, b(14), b(14)-98, b(14)-98++, b(14)++, b(15)-98, b(15)-196, b(15)-98++, b(16), b(16)++, b(17)-196, b(17)-196++, b(18)++, b(18)-196++, b(19)++, b(19)-196++, b(20)++, b(20)-196++, b(21)++, b(21)-98++, b(22)-98++, b(22)++, b(22)-196++, b(23)++, b(23)-98++

**Matched y ions:** y(2), y(3), y(4)++, y(4), y(5), y(7), y(8), y(9), y(10)++, y(10), y(11)++, y(11), y(13)++, y(13), y(14)++, y(15)++, y(16)++, y(17)-98++, y(18)-98++, y(19)-98++, y(20)-196++, y(21)-196++, y(21)++, y(22)-98++, y(23)-98++

**Precursor origin neutral loss:** +

## Peptide No.1135

**TLSQSSESGTLPSGPPGHTMEVSC**

**Confirmed sites:** @S:8

**Ambiguous sites:**

MS/MS Fragmentation of **TLSQSSESGTLPSGPPGHTMEVSC**

Found in **NDRG2\_MOUSE**, Protein NDRG2 OS=Mus musculus GN=Ndr2 PE=1 SV=1

Match to Query 6204: 2553.077799 from(852.033209,3+)

Title: Elution from: 44.165 to 44.165 scan no 3887 cid35.00 polarity:+:MA10:m1s



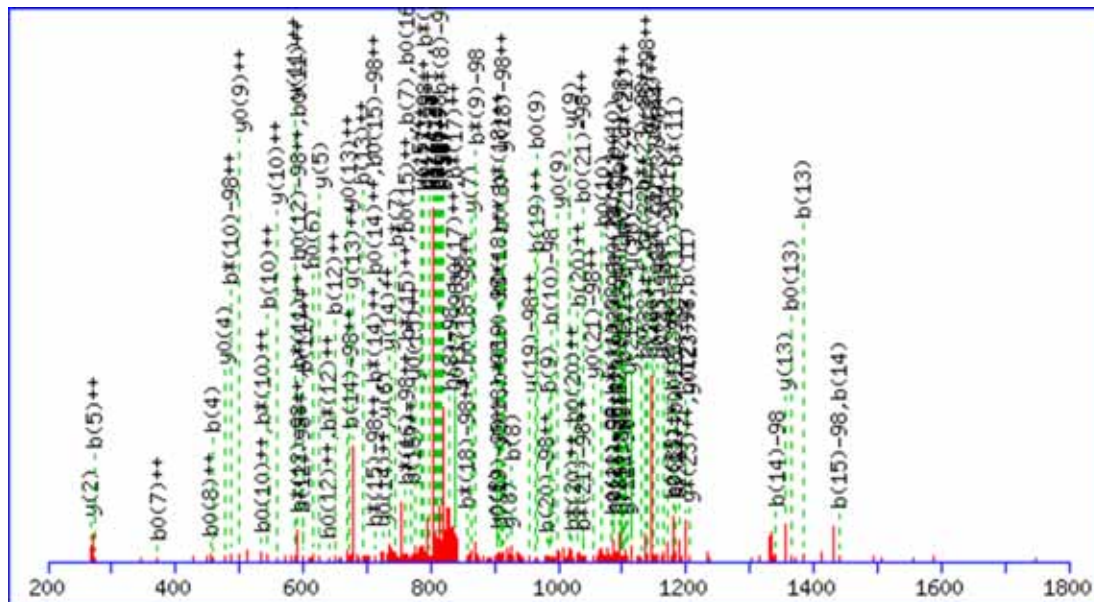

**Monoisotopic mass of neutral peptide Mr(calc):** 2553.0764

**Fixed modifications:** Carbamidomethyl (C) (apply to specified residues or termini only)

**Variable modifications:**

**N-term :** Dimethyl (N-term)

**S8 :** Phospho (ST), with neutral losses 0.0000(shown in table), 97.9769

**Ions Score:** 34 **Expect:** 0.025

**Matched b ions:** b(4), b(5)++, b(7), b(8), b(8)-98, b(9), b(10)++, b(10), b(10)-98, b(11), b(11)++, b(11)-98, b(12)-98, b(12)++, b(12)-98++, b(13), b(13)++, b(14)-98, b(14), b(14)-98++, b(15)-98, b(15)++, b(16)++, b(17)-98++, b(19)++, b(20)++, b(20)-98++, b(21)++, b(22)++, b(22)-98++, b(23)++, b(23)-98++  
**Matched y ions:** y(2), y(5), y(6), y(7), y(8), y(9), y(10)++, y(10), y(11), y(11)++, y(13)++, y(13), y(14)++, y(15)++, y(16)++, y(18)-98++, y(19)-98++, y(21)++, y(22)-98++, y(23)-98++  
**Precursor origin neutral loss:** +

## Peptide No.1136

**TLSQSSESGTLPSGPPGHTMEVSC**

**Confirmed sites:** @T:1,@S:3

**Ambiguous sites:**

**MS/MS Fragmentation of** **TLSQSSESGTLPSGPPGHTMEVSC**

Found in **NDRG2\_MOUSE**, Protein NDRG2 OS=Mus musculus GN=Ndr2 PE=1 SV=1

Match to Query 6955: 2633.044500 from(878.688776,3+)

Title: Elution from: 48.093 to 48.093 scan no 4468 cid35.00 polarity:+:MA10:m1s

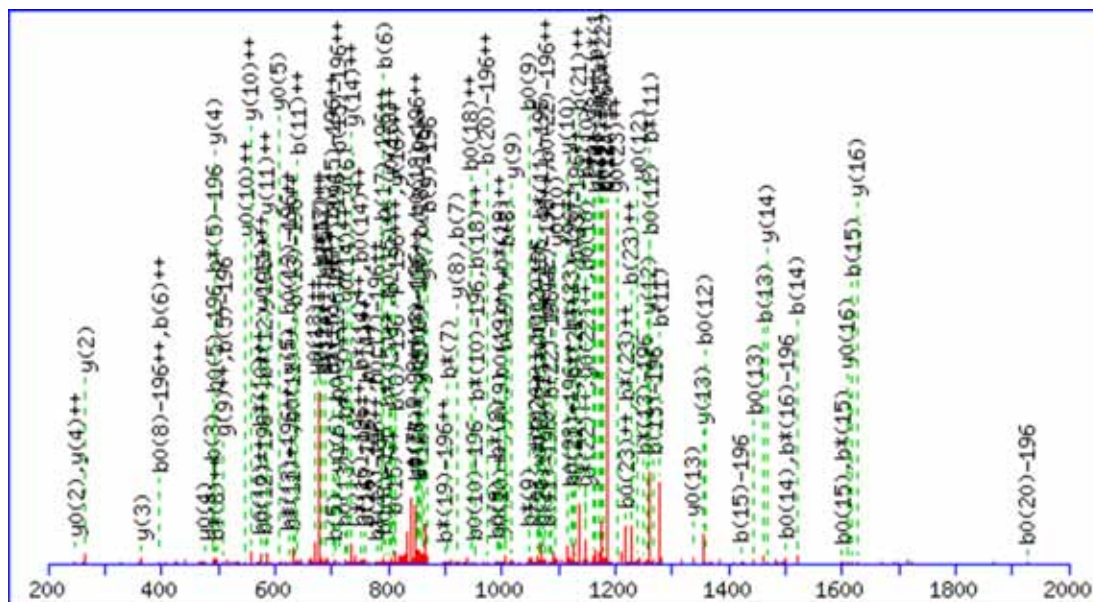

**Monoisotopic mass of neutral peptide Mr(calc):** 2633.0428

**Fixed modifications:** Carbamidomethyl (C) (apply to specified residues or termini only)

**Variable modifications:**

**N-term :** Dimethyl (N-term)

**T1 :** Phospho (ST), with neutral losses 0.0000(shown in table), 97.9769

**S3 :** Phospho (ST), with neutral losses 0.0000(shown in table), 97.9769

**Ions Score:** 42 **Expect:** 0.0026

**Matched b ions:** b(3), b(4)-98++, b(5)-196, b(5)-98, b(5), b(6)-98, b(6)++, b(6), b(7)-98, b(7), b(8), b(8)-196, b(9)-196, b(9), b(10), b(10)-98++, b(11), b(11)++, b(11)-196, b(11)-98, b(12)-98, b(12)-98++, b(12)++, b(12)-196, b(13), b(13)-196, b(13)-196++, b(13)-98++, b(14), b(14)-98, b(14)-98++, b(14)++, b(15)-98, b(15), b(15)-196, b(15)-196++, b(15)-98++, b(15)++, b(16)-98, b(16)++, b(16)-196++, b(16)-98++, b(17)-196++, b(17)-98++, b(18)-196++, b(18)-98++, b(18)++, b(19)++, b(20)++, b(20)-98++, b(20)-196++, b(21)++, b(21)-98++, b(22)-98++, b(22)++, b(22)-196++, b(23)++, b(23)-196++, b(23)-98++

**Matched y ions:** y(2), y(3), y(4), y(4)++, y(5), y(6), y(7), y(8), y(9), y(9)++, y(10)++, y(10), y(11)++, y(11), y(12), y(13)++, y(13), y(14)++, y(14), y(16), y(16)++, y(17)++, y(21)++, y(23)-98++

**Precursor origin neutral loss:** +

## Peptide No.1137

**TLSQSSESGTLPSGPPGHTMEVSC**

**Confirmed sites:** @S:3

**Ambiguous sites:**

MS/MS Fragmentation of **TLSQSSESGTLPSGPPGHTMEVSC**

Found in **NDRG2\_MOUSE**, Protein NDRG2 OS=Mus musculus GN=Ndr2 PE=1 SV=1

Match to Query 6572: 2575.103776 from(1288.559164,2+)

Title: Elution from: 39.208 to 39.208 scan no 3348 cid35.00 polarity:+:MA10:m1s

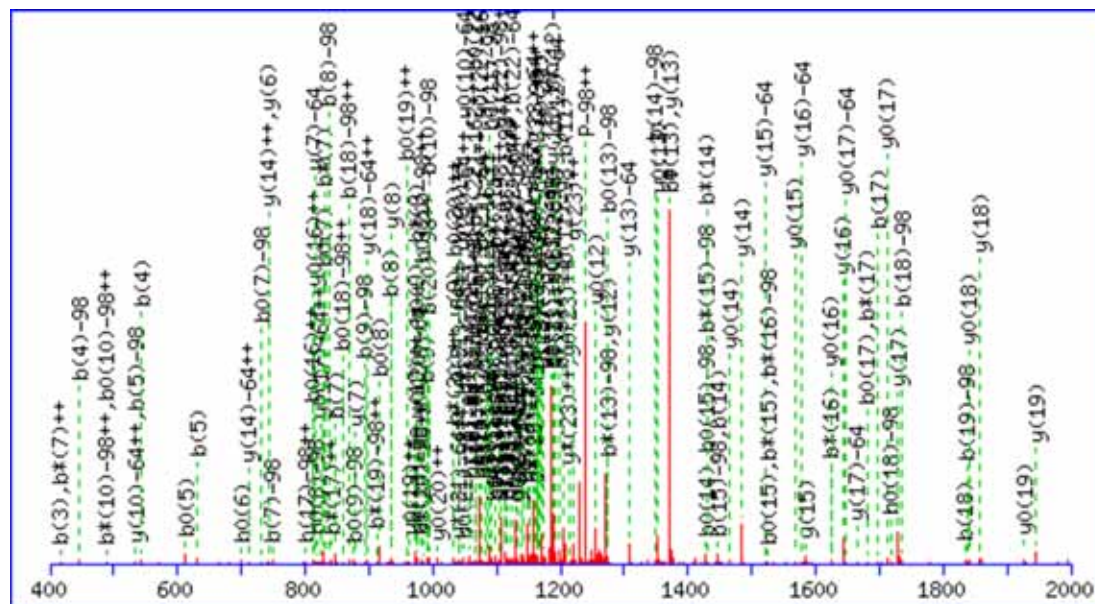

**Monoisotopic mass of neutral peptide Mr(calc):** 2575.1032

**Fixed modifications:** Carbamidomethyl (C) (apply to specified residues or termini only)

**Variable modifications:**

**N-term :** Dimethyl:2H(4)13C(2) (N-term)

**S3 :** Phospho (ST), with neutral losses 97.9769(shown in table), 0.0000

**M20 :** Oxidation (M), with neutral losses 0.0000(shown in table), 63.9983

**Ions Score:** 61 **Expect:** 5.1e-005

**Matched b ions:** b(3), b(4)-98, b(4), b(5), b(5)-98, b(7)-98, b(7), b(8), b(8)-98, b(9), b(9)-98, b(10)-98, b(10), b(11)-98, b(11), b(12)-98, b(14), b(14)-98, b(15)-98, b(17)-98++, b(17), b(18)-98, b(18), b(18)-98++, b(19)-98, b(20)-98++, b(20)++, b(21)++, b(21)-98++, b(22)-98++, b(22)++, b(23)-98++, b(23)++

**Matched y ions:** y(6), y(7), y(8), y(9), y(10), y(11), y(12), y(13), y(14), y(14)++, y(15), y(16), y(17), y(18), y(19), y(19)++, y(21)++, y(22)-98++, y(22)++, y(23)++, y(23)-98++

**Precursor origin neutral loss:** +

## Peptide No.1138

**TLSQSSESGTLPSGPPGHTMEVSC**

**Confirmed sites:** @S:3,@S:5

**Ambiguous sites:**

MS/MS Fragmentation of **TLSQSSESGTLPSGPPGHTMEVSC**

Found in **NDRG2\_MOUSE**, Protein NDRG2 OS=Mus musculus GN=Ndr2 PE=1 SV=1

Match to Query 6773: 2655.070412 from(1328.542482,2+)

Title: Elution from: 41.944 to 41.944 scan no 3704 cid35.00 polarity:+:MA10:m1s









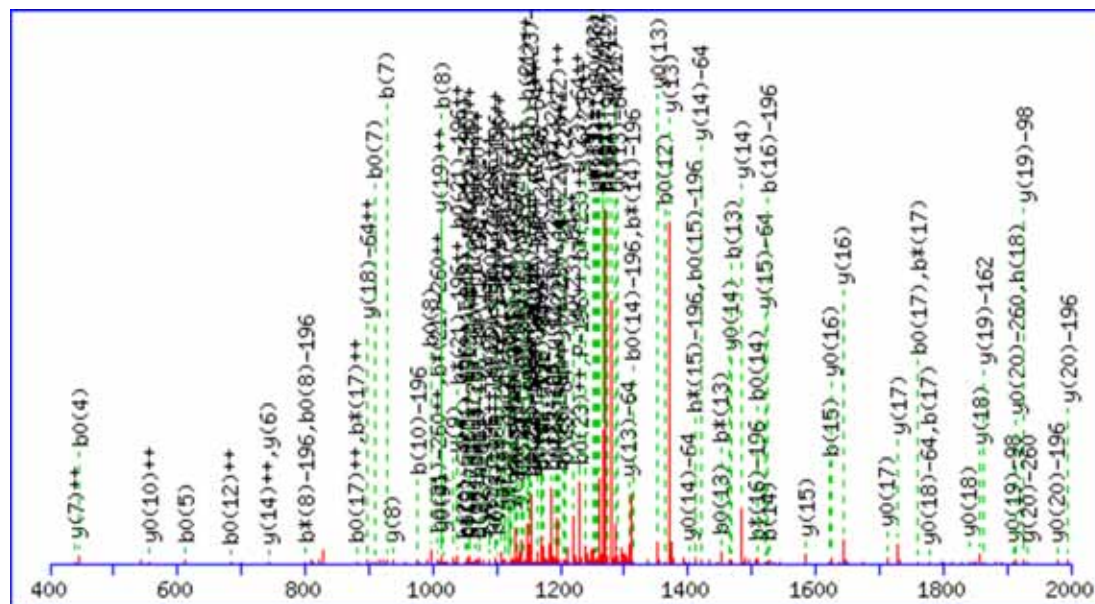

**Monoisotopic mass of neutral peptide Mr(calc):** 2655.0695

**Fixed modifications:** Carbamidomethyl (C) (apply to specified residues or termini only)

**Variable modifications:**

**N-term :** Dimethyl:2H(4)13C(2) (N-term)

**S5 :** Phospho (ST), with neutral losses 97.9769(shown in table), 0.0000

**S6 :** Phospho (ST), with neutral losses 97.9769(shown in table), 0.0000

**M20 :** Oxidation (M), with neutral losses 0.0000(shown in table), 63.9983

**Ions Score:** 58 **Expect:** 8.5e-005

**Matched b ions:** b(6)-98, b(7)-98, b(7), b(8), b(8)-98, b(9), b(10)-196, b(10)-98, b(10), b(11)-98, b(11), b(11)-196, b(12)-196, b(12)-98, b(13)-98, b(13), b(13)-196, b(14), b(15), b(15)-98, b(16)-98, b(16)-98, b(16)-196, b(17), b(18), b(18)-98, b(18)-98, b(20)-98, b(21)++, b(21)-98, b(22)++, b(22)-98, b(22)-196, b(23)++, b(23)-196, b(23)-98

**Matched y ions:** y(6), y(7)++, y(8), y(9), y(10), y(11), y(12), y(13), y(14), y(14)++, y(15), y(16), y(17), y(18), y(19)-98, y(19)++, y(20)-196, y(20)++, y(21)-98, y(22)-196, y(22)-98, y(22)++, y(23)++, y(23)-98

**Precursor origin neutral loss:** +

## Peptide No.1141

**TLSQSSESGTLPSPGPPGHTMEVSC**

**Confirmed sites:**

**Ambiguous sites:** @S:5orS:6

MS/MS Fragmentation of **TLSQSSESGTLPSPGPPGHTMEVSC**

Found in **NDRG2\_MOUSE**, Protein NDRG2 OS=Mus musculus GN=Ndr2 PE=1 SV=1

Match to Query 6573: 2575.104478 from(1288.559515,2+)

Title: Elution from: 38.873 to 38.873 scan no 3300 cid35.00 polarity:+:MA10:m1s



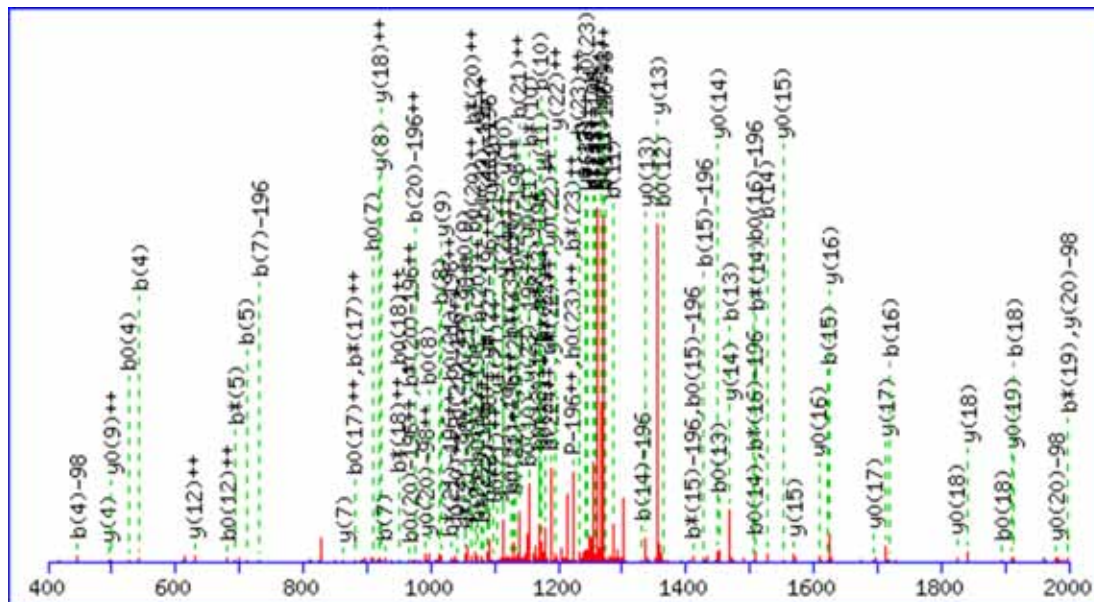

**Monoisotopic mass of neutral peptide Mr(calc):** 2639.0746

**Fixed modifications:** Carbamidomethyl (C) (apply to specified residues or termini only)

**Variable modifications:**

**N-term :** Dimethyl:2H(4)13C(2) (N-term)

**S3 :** Phospho (ST), with neutral losses 0.0000(shown in table), 97.9769

**S5 :** Phospho (ST), with neutral losses 0.0000(shown in table), 97.9769

**Ions Score:** 51 **Expect:** 0.00038

**Matched b ions:** b(4)-98, b(4), b(5)-98, b(5), b(6)-98, b(7)-98, b(7)-196, b(7), b(8), b(8)-98, b(9), b(9)-98, b(10)-98, b(10), b(11)-98, b(11)-196, b(11), b(12)-98, b(13)-196, b(13)-98, b(13), b(14), b(14)-196, b(14)-98, b(15)-98, b(15), b(15)-196, b(16)-98, b(16), b(16)-98, b(18)-98, b(18)++, b(20)++, b(20)-196, b(21)-98, b(21)++, b(21)-196, b(22)++, b(22)-196, b(22)-98, b(23)-196, b(23)-98, b(23)++

**Matched y ions:** y(4), y(7), y(8), y(9), y(10), y(11), y(12)++, y(12), y(13), y(14), y(15), y(16), y(17), y(18), y(18)++, y(20)-98, y(21)++, y(22)-98, y(22)++, y(23)-196, y(23)++, y(23)-98

**Precursor origin neutral loss:** +

## Peptide No.1143

**TLSQSSESGTLPSGPPGHTMEVSC**

**Confirmed sites:** @S:5

**Ambiguous sites:**

MS/MS Fragmentation of **TLSQSSESGTLPSGPPGHTMEVSC**

Found in **NDRG2\_MOUSE**, Protein NDRG2 OS=Mus musculus GN=NdrG2 PE=1 SV=1

Match to Query 6796: 2559.109892 from(1280.562222,2+)

Title: Elution from: 44.349 to 44.349 scan no 4018 cid35.00 polarity:+:MA10:m1s



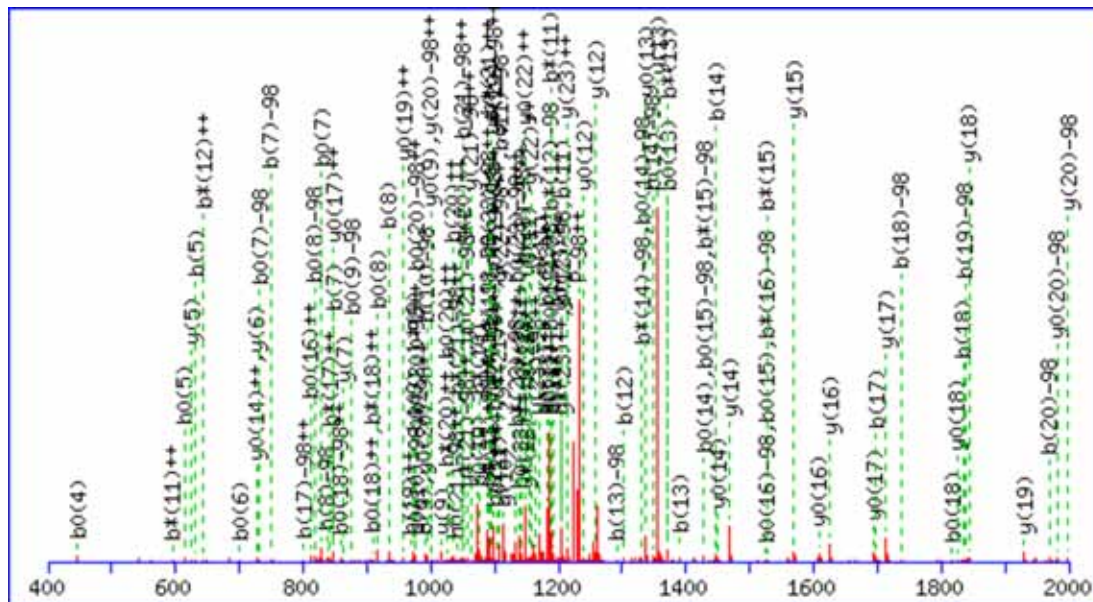

**Monoisotopic mass of neutral peptide Mr(calc): 2559.1083**

**Fixed modifications:** Carbamidomethyl (C) (apply to specified residues or termini only)

**Variable modifications:**

**N-term :** Dimethyl:2H(4)13C(2) (N-term)

**S5 :** Phospho (ST), with neutral losses 97.9769(shown in table), 0.0000

**Ions Score:** 66 **Expect:** 1.6e-005

**Matched b ions:** b(5), b(7), b(7)-98, b(8), b(8)-98, b(9), b(10)-98, b(10), b(11), b(11)-98, b(12)-98, b(12), b(13)-98, b(13), b(14), b(14)-98, b(17), b(17)-98++, b(18), b(18)-98, b(19)-98, b(19)++, b(20)-98, b(20)++, b(21)++, b(21)-98++, b(22)-98++, b(22)++, b(23)-98++, b(23)++

**Matched y ions:** y(5), y(6), y(7), y(9), y(10), y(11), y(12), y(13), y(14), y(15), y(16), y(17), y(18), y(19), y(20)-98, y(20)-98++, y(20)++, y(21)-98++, y(22)-98++, y(22)++, y(23)-98++, y(23)++

**Precursor origin neutral loss:** +

## Peptide No.1144

**TLSQSSESGTLPSGPPGHTMEVSC**

**Confirmed sites:** @S:5,@S:6

**Ambiguous sites:**

**MS/MS Fragmentation of TLSQSSESGTLPSGPPGHTMEVSC**

Found in NDRG2\_MOUSE, Protein NDRG2 OS=Mus musculus GN=Ndr2 PE=1 SV=1

Match to Query 7095: 2639.075034 from(1320.544793,2+)

Title: Elution from: 48.173 to 48.173 scan no 4532 cid35.00 polarity:+:MA10:m1s

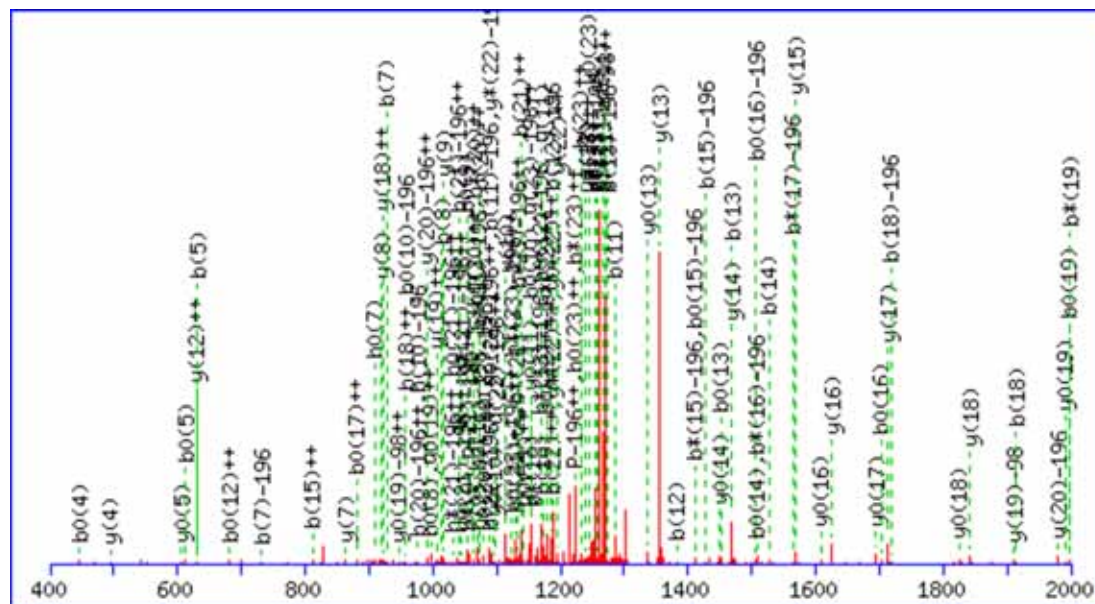

**Monoisotopic mass of neutral peptide Mr(calc):** 2639.0746

**Fixed modifications:** Carbamidomethyl (C) (apply to specified residues or termini only)

**Variable modifications:**

**N-term :** Dimethyl:2H(4)13C(2) (N-term)

**S5 :** Phospho (ST), with neutral losses 97.9769(shown in table), 0.0000

**S6 :** Phospho (ST), with neutral losses 97.9769(shown in table), 0.0000

**Ions Score:** 60 **Expect:** 4.7e-005

**Matched b ions:** b(5), b(6)-98, b(7)-98, b(7)-196, b(7), b(8), b(8)-98, b(9), b(9)-98, b(10)-196, b(10)-98, b(10), b(11)-98, b(11)-196, b(11), b(12)-196, b(12)-98, b(12), b(13), b(13)-196, b(14)-98, b(14), b(15)++, b(15)-196, b(16)-98++, b(18), b(18)-98, b(18)-196, b(18)-98++, b(18)++, b(20)-196++, b(20)++, b(21)++, b(21)-98++, b(21)-196++, b(22)-98++, b(22)++, b(22)-196++, b(23)-196++, b(23)-98++, b(23)++

**Matched y ions:** y(4), y(7), y(8), y(9), y(10), y(11), y(12)++, y(12), y(13), y(14), y(15), y(16), y(17), y(18), y(18)++, y(19)-98, y(19)++, y(20)-196, y(20)-196++, y(20)++, y(20)-98++, y(21)-196++, y(21)-98++, y(22)-196++, y(22)-98++, y(22)++, y(23)-196++, y(23)++, y(23)-98++

**Precursor origin neutral loss:** +

## Peptide No.1145

**TLSQSSESGTLPSGPPGHTMEVSC**

**Confirmed sites:** @S:6

**Ambiguous sites:**

MS/MS Fragmentation of **TLSQSSESGTLPSGPPGHTMEVSC**

Found in **NDRG2\_MOUSE**, Protein NDRG2 OS=Mus musculus GN=NdrG2 PE=1 SV=1

Match to Query 6215: 2559.107016 from(1280.560784,2+)

Title: Elution from: 44.195 to 44.195 scan no 3891 cid35.00 polarity:+:MA10:m1s

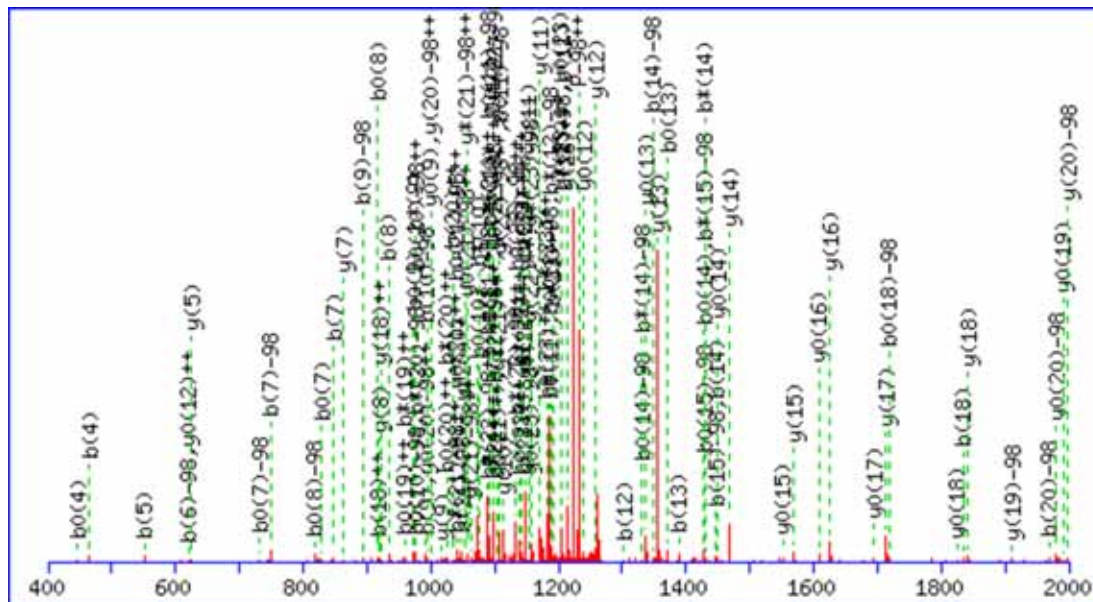

**Monoisotopic mass of neutral peptide Mr(calc):** 2559.1083

**Fixed modifications:** Carbamidomethyl (C) (apply to specified residues or termini only)

**Variable modifications:**

**N-term :** Dimethyl:2H(4)13C(2) (N-term)

**S6 :** Phospho (ST), with neutral losses 97.9769(shown in table), 0.0000

**Ions Score:** 61 **Expect:** 4.9e-005

**Matched b ions:** b(4), b(5), b(6)-98, b(7)-98, b(7), b(8), b(9), b(9)-98, b(10)-98, b(10), b(11)-98, b(11), b(12)-98, b(12), b(13), b(14), b(14)-98, b(15)-98, b(18), b(18)++, b(20)-98, b(20)++, b(21)++, b(21)-98++, b(22)-98++, b(22)++, b(23)-98++, b(23)++

**Matched y ions:** y(5), y(7), y(8), y(9), y(10), y(11), y(12), y(13), y(14), y(15), y(16), y(17), y(18), y(18)++, y(19)-98, y(20)-98, y(20)-98++, y(20)++, y(21)-98++, y(22)-98++, y(22)++, y(23)++

**Precursor origin neutral loss:** +

## Peptide No.1146

**TLSQSSESGTLPSGPPGHTMEVSC**

**Confirmed sites:** @T:1

**Ambiguous sites:**

**MS/MS Fragmentation of** **TLSQSSESGTLPSGPPGHTMEVSC**

Found in **NDRG2\_MOUSE**, Protein NDRG2 OS=Mus musculus GN=Ndr2 PE=1 SV=1

Match to Query 6713: 2559.109840 from(1280.562196,2+)

Title: Elution from: 44.299 to 44.299 scan no 4034 cid35.00 polarity:+:MA10:m1s

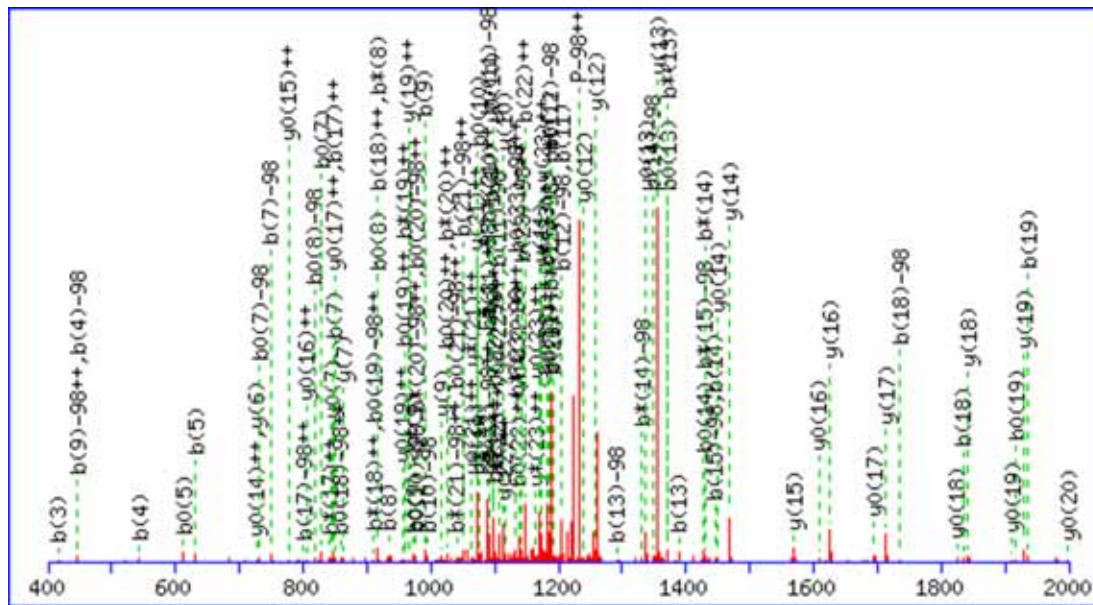

**Monoisotopic mass of neutral peptide Mr(calc):** 2559.1083

**Fixed modifications:** Carbamidomethyl (C) (apply to specified residues or termini only)

**Variable modifications:**

**N-term :** Dimethyl:2H(4)13C(2) (N-term)

**T1 :** Phospho (ST), with neutral losses 0.0000(shown in table), 97.9769

**Ions Score:** 61 **Expect:** 5.5e-005

**Matched b ions:** b(3), b(4)-98, b(4), b(5), b(7)-98, b(7), b(8), b(9)-98+, b(9), b(10)-98, b(10), b(11)-98, b(11), b(12)-98, b(13), b(13)-98, b(14), b(14)-98, b(15)-98, b(17)-98+, b(17)+, b(18)-98, b(18), b(18)+, b(19), b(21)+, b(21)-98+, b(22)+, b(22)-98+, b(23)-98+, b(23)+

**Matched y ions:** y(6), y(7), y(9), y(10), y(11), y(12), y(13), y(14), y(15), y(16), y(17), y(18), y(19), y(19)+, y(21)+, y(22)+, y(23)+

**Precursor origin neutral loss:** +

## Peptide No.1147

**TLSQSSESGTLPSGPPGHTMEVSC**

**Confirmed sites:** @T:1,@S:3

**Ambiguous sites:**

MS/MS Fragmentation of **TLSQSSESGTLPSGPPGHTMEVSC**

Found in **NDRG2\_MOUSE**, Protein NDRG2 OS=Mus musculus GN=Ndr2 PE=1 SV=1

Match to Query 6261: 2639.077188 from(880.699672,3+)

Title: Elution from: 47.750 to 47.750 scan no 4295 cid35.00 polarity:+:MA10:m1s



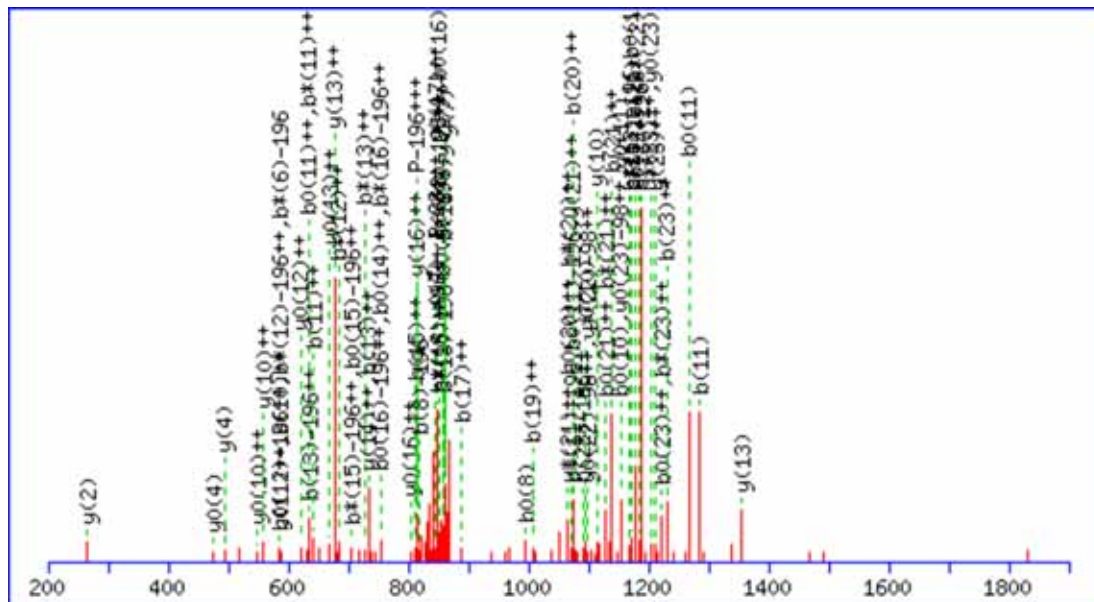

**Monoisotopic mass of neutral peptide Mr(calc):** 2639.0746

**Fixed modifications:** Carbamidomethyl (C) (apply to specified residues or termini only)

**Variable modifications:**

**N-term :** Dimethyl:2H(4)13C(2) (N-term)

**T1 :** Phospho (ST), with neutral losses 0.0000(shown in table), 97.9769

**S3 :** Phospho (ST), with neutral losses 0.0000(shown in table), 97.9769

**Ions Score:** 35 **Expect:** 0.016

**Matched b ions:** b(7)-98, b(8)-196, b(10)-98, b(10)++, b(10), b(11)-98, b(11), b(11)++, b(12)-98++, b(12)-98, b(12)-196, b(13)++, b(13)-196++, b(15)++, b(16)-98++, b(16)++, b(17)++, b(18)-196++, b(19)++, b(20)++, b(21)++, b(22)-98++, b(22)++, b(22)-196++, b(23)++

**Matched y ions:** y(2), y(4), y(7), y(10)++, y(10), y(11)++, y(11), y(13)++, y(13), y(14)++, y(16)++, y(17)++, y(21)++, y(23)++

**Precursor origin neutral loss:** +

## Peptide No.1148

**TNSPDLDSQSLSLSSGTDQEPLQR**

**Confirmed sites:** @S:10

**Ambiguous sites:**

**MS/MS Fragmentation of TNSPDLDSQSLSLSSGTDQEPLQR**

Found in **ABLM2\_MOUSE**, Actin-binding LIM protein 2 OS=Mus musculus GN=Ablim2 PE=1 SV=1

Match to Query 7022: 2682.204609 from(895.075479,3+)

Title: Elution from: 49.153 to 49.153 scan no 4634 cid35.00 polarity:+:MA10:m1s



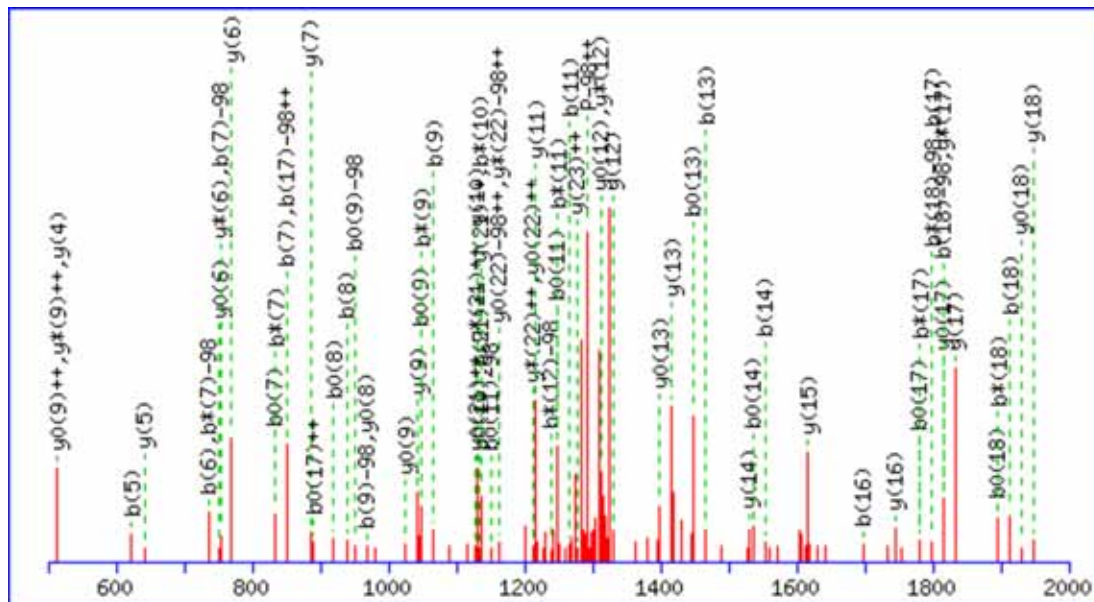

**Monoisotopic mass of neutral peptide Mr(calc):** 2682.2021

**Fixed modifications:** Carbamidomethyl (C) (apply to specified residues or termini only)

**Variable modifications:**

**N-term :** Dimethyl (N-term)

**S3 :** Phospho (ST), with neutral losses 0.0000(shown in table), 97.9769

**Ions Score:** 86 **Expect:** 2e-007

**Matched b ions:** b(5), b(6), b(7), b(7)-98, b(8), b(9)-98, b(9), b(11), b(13), b(14), b(16), b(17)-98++, b(17), b(18), b(18)-98, b(21)++

**Matched y ions:** y(4), y(5), y(6), y(7), y(9), y(10), y(11), y(12), y(13), y(14), y(15), y(16), y(17), y(18), y(21)++, y(23)++

**Precursor origin neutral loss:** +

## Peptide No.1150

**TNSPDLDSQSLSLSSGTDQEPLQR**

**Confirmed sites:** @S:8

**Ambiguous sites:**

MS/MS Fragmentation of **TNSPDLDSQSLSLSSGTDQEPLQR**

Found in **ABLM2\_MOUSE**, Actin-binding LIM protein 2 OS=Mus musculus GN=Ablim2 PE=1 SV=1

Match to Query 7067: 2682.203382 from(895.075070,3+)

Title: Elution from: 49.292 to 49.292 scan no 4602 cid35.00 polarity:+:MA10:m1s

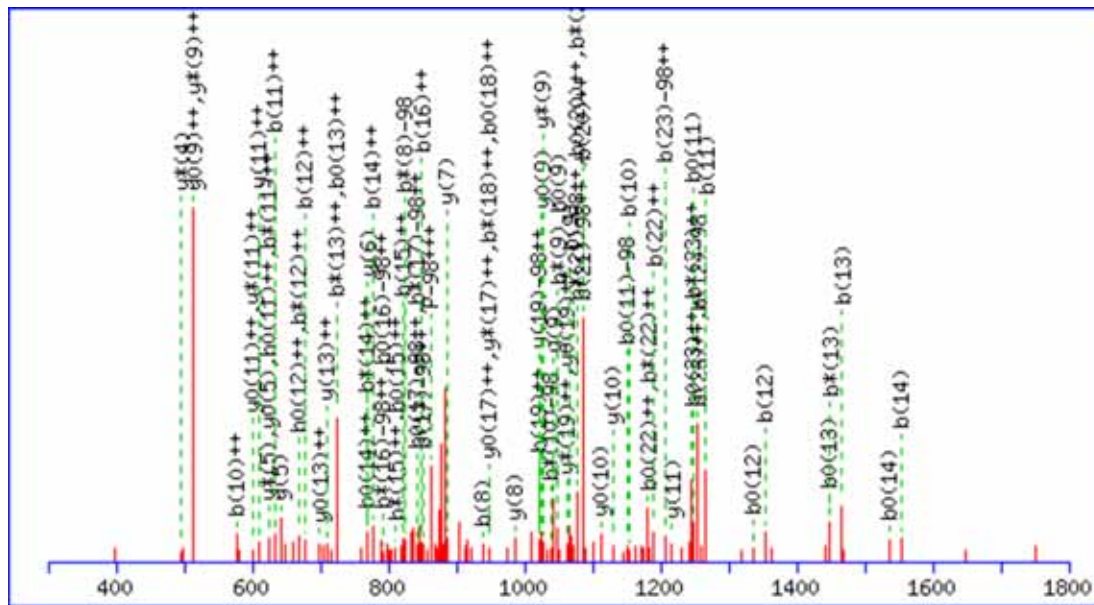

**Monoisotopic mass of neutral peptide Mr(calc):** 2682.2021

**Fixed modifications:** Carbamidomethyl (C) (apply to specified residues or termini only)

**Variable modifications:**

**N-term :** Dimethyl (N-term)

**S8 :** Phospho (ST), with neutral losses 0.0000(shown in table), 97.9769

**Ions Score:** 41 **Expect:** 0.0063

**Matched b ions:** b(8), b(9), b(10)++, b(10), b(11)++, b(11), b(12)-98, b(12), b(12)++, b(13), b(14), b(14)++, b(15)++, b(16)++, b(17)-98++, b(19)++, b(20)++, b(21)-98++, b(22)++, b(23)++, b(23)-98++

**Matched y ions:** y(4), y(5), y(6), y(7), y(8), y(9), y(10), y(11)++, y(11), y(13)++, y(19)-98++

**Precursor origin neutral loss:** +

## Peptide No.1151

**TNSPDLDSQSLSLSSGTDQEPLQR**

**Confirmed sites:** @S:3

**Ambiguous sites:**

**MS/MS Fragmentation of TNSPDLDSQSLSLSSGTDQEPLQR**

Found in **ABLM2\_MOUSE**, Actin-binding LIM protein 2 OS=Mus musculus GN=Ablim2 PE=1 SV=1

Match to Query 8524: 2688.236064 from(897.085964,3+)

Title: Elution from: 49.201 to 49.201 scan no 4861 cid35.00 polarity:+:MA10:m1s



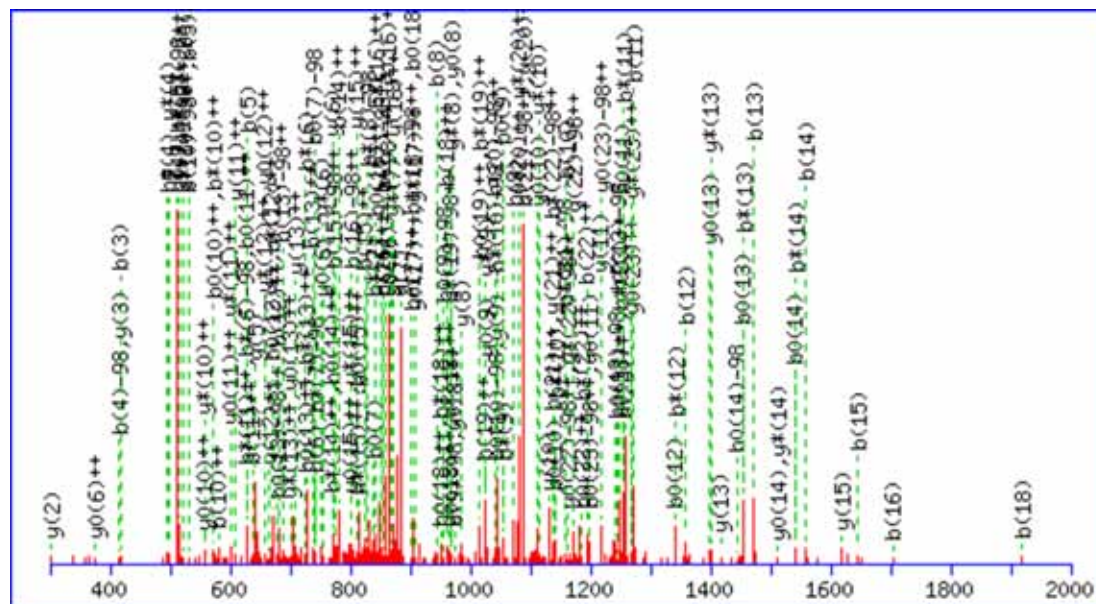

**Monoisotopic mass of neutral peptide Mr(calc):** 2688.2340

**Fixed modifications:** Carbamidomethyl (C) (apply to specified residues or termini only)

**Variable modifications:**

**N-term :** Dimethyl:2H(4)13C(2) (N-term)

**S3 :** Phospho (ST), with neutral losses 0.0000(shown in table), 97.9769

**Ions Score:** 77 **Expect:** 1.9e-006

**Matched b ions:** b(3), b(4), b(4)-98, b(5)-98, b(5), b(6), b(7), b(8), b(9)-98, b(9), b(10)++, b(10)-98++, b(10), b(11), b(11)++, b(12), b(12)++, b(13), b(13)-98++, b(13)++, b(14)++, b(14), b(15), b(15)-98++, b(15)++, b(16), b(16)-98++, b(16)++, b(17)-98++, b(17)++, b(18), b(18)++, b(19)++, b(20)++, b(20)-98++, b(21)-98++, b(21)++, b(22)++, b(23)++

**Matched y ions:** y(2), y(3), y(4), y(5), y(6), y(7), y(8), y(9), y(9)++, y(10), y(11), y(11)++, y(12)++, y(13), y(13)++, y(15), y(15)++, y(16)++, y(18)++, y(20)++, y(21)++, y(22)-98++

**Precursor origin neutral loss:** +

## Peptide No.1152

**TNSPDLDSQSLSLSSGTDQEPLQR**

**Confirmed sites:** @T:1

**Ambiguous sites:**

MS/MS Fragmentation of **TNSPDLDSQSLSLSSGTDQEPLQR**

Found in **ABLM2\_MOUSE**, Actin-binding LIM protein 2 OS=Mus musculus GN=Ablim2 PE=1 SV=1

Match to Query 7211: 2688.236019 from(897.085949,3+)

Title: Elution from: 49.238 to 49.238 scan no 4660 cid35.00 polarity:+:MA10:m1s

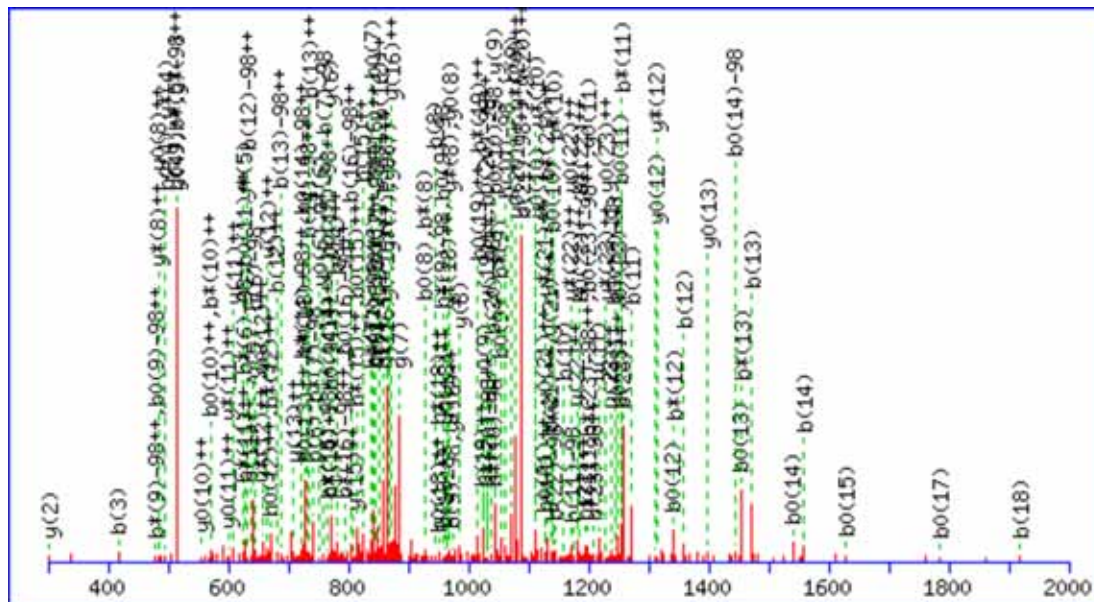

**Monoisotopic mass of neutral peptide Mr(calc):** 2688.2340

**Fixed modifications:** Carbamidomethyl (C) (apply to specified residues or termini only)

**Variable modifications:**

**N-term :** Dimethyl:2H(4)13C(2) (N-term)

**T1 :** Phospho (ST), with neutral losses 0.0000(shown in table), 97.9769

**Ions Score:** 62 **Expect:** 5.9e-005

**Matched b ions:** b(3), b(4), b(6), b(6)-98, b(7), b(7)-98, b(8)-98, b(8), b(9)-98, b(9), b(10)-98, b(10), b(11), b(11)++, b(11)-98, b(12), b(12)++, b(12)-98++, b(13), b(13)-98++, b(13)++, b(14), b(14)++, b(14)-98++, b(15)++, b(16)-98++, b(16)++, b(18), b(18)++, b(19)++, b(20)++, b(20)-98++, b(21)-98++, b(21)++, b(22)++, b(22)-98++, b(23)++, b(23)-98++

**Matched y ions:** y(2), y(4), y(5), y(6), y(7), y(8), y(9), y(10), y(11), y(11)++, y(12)++, y(13)++, y(14)++, y(15)++, y(16)++, y(18)++, y(19)++, y(20)++, y(21)++, y(22)++, y(23)++

**Precursor origin neutral loss:** +

## Peptide No.1153

**TNSPISPSMLSNAEHK**

**Confirmed sites:** @S:3,@S:7

**Ambiguous sites:**

**MS/MS Fragmentation of TNSPISPSMLSNAEHK**

Found in **ATX2\_MOUSE**, Ataxin-2 OS=Mus musculus GN=Atxn2 PE=1 SV=1

Match to Query 5678: 2014.848906 from(672.623578,3+)

Title: Elution from: 45.484 to 45.484 scan no 4360 cid35.00 polarity:+:MA10:m1s



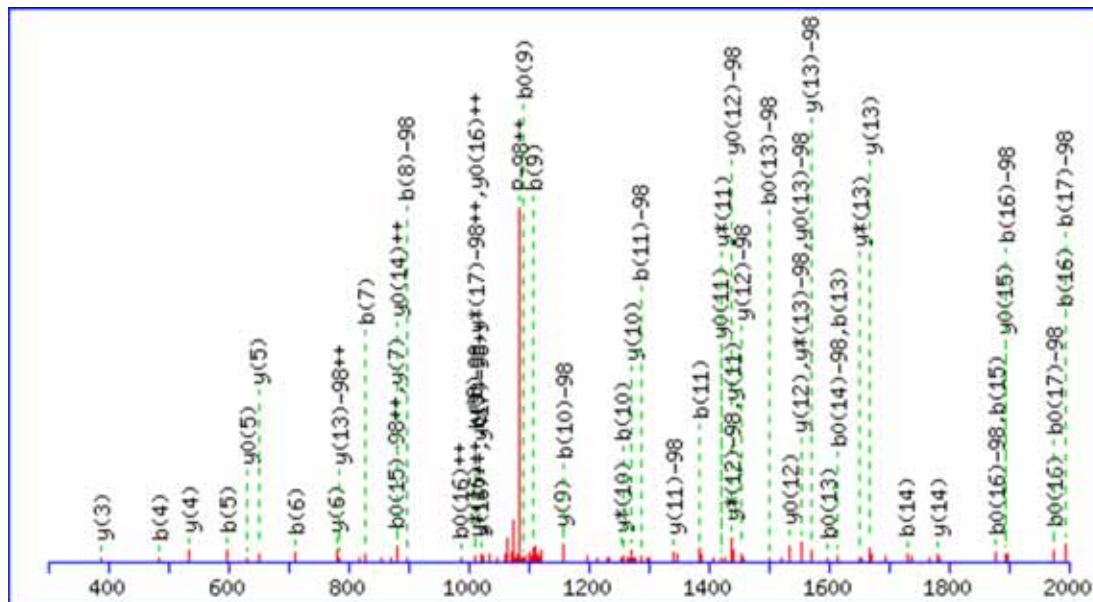

**Monoisotopic mass of neutral peptide Mr(calc):** 2265.8839

**Fixed modifications:** Carbamidomethyl (C) (apply to specified residues or termini only)

**Variable modifications:**

**N-term :** Dimethyl (N-term)

**S8 :** Phospho (ST), with neutral losses 0.0000(shown in table), 97.9769

**Ions Score:** 90 **Expect:** 3.4e-008

**Matched b ions:** b(4), b(5), b(6), b(7), b(8)-98, b(9), b(9)-98, b(10), b(10)-98, b(11), b(11)-98, b(13), b(14), b(15), b(16), b(16)-98, b(17)-98

**Matched y ions:** y(3), y(4), y(5), y(6), y(7), y(8), y(9), y(10), y(11), y(11)-98, y(12), y(12)-98, y(13), y(13)-98++, y(13)-98, y(14), y(16)++, y(17)-98++

**Precursor origin neutral loss:** +

## Peptide No.1155

**TPEELDDSFETEDFDVR**

**Confirmed sites:** @S:8

**Ambiguous sites:**

**MS/MS Fragmentation of TPEELDDSFETEDFDVR**

Found in **CTNA1\_MOUSE**, Catenin alpha-1 OS=Mus musculus GN=Ctnna1 PE=1 SV=1

Match to Query 5529: 2271.917570 from(1136.966061,2+)

Title: Elution from: 57.198 to 57.198 scan no 5213 cid35.00 polarity:+:MA10:m1s



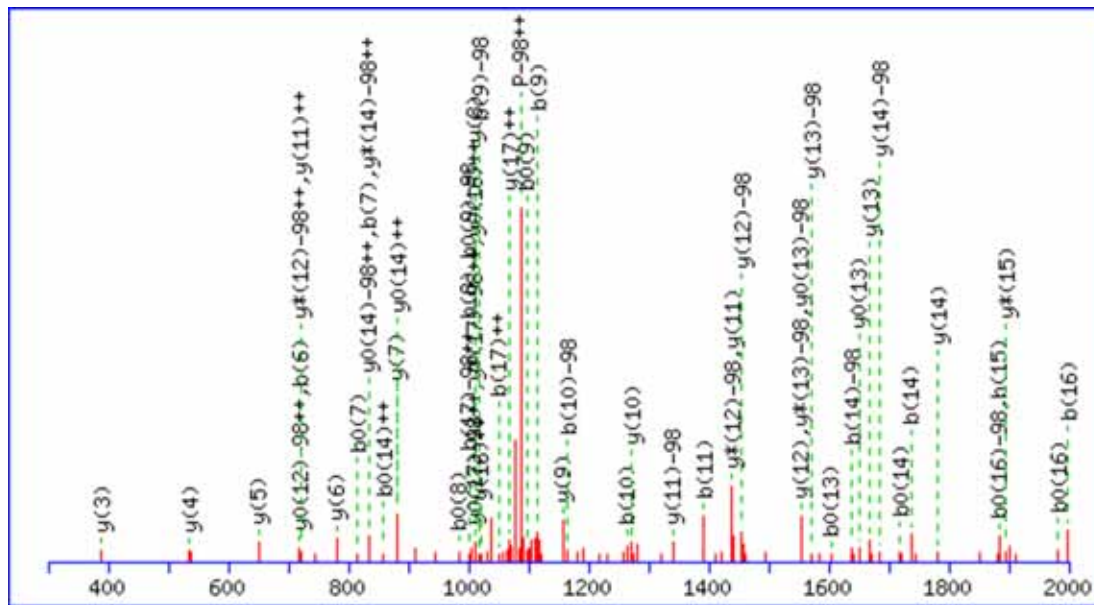

**Monoisotopic mass of neutral peptide Mr(calc):** 2271.9157

**Fixed modifications:** Carbamidomethyl (C) (apply to specified residues or termini only)

**Variable modifications:**

**N-term :** Dimethyl:2H(4)13C(2) (N-term)

**S8 :** Phospho (ST), with neutral losses 0.0000(shown in table), 97.9769

**Ions Score:** 75 **Expect:** 1.3e-006

**Matched b ions:** b(6), b(7), b(8), b(9), b(9)-98, b(10), b(10)-98, b(11), b(14), b(14)-98, b(15), b(16), b(17)-98++, b(17)++

**Matched y ions:** y(3), y(4), y(5), y(6), y(7), y(8), y(9), y(10), y(11)-98, y(11), y(11)++, y(12), y(12)-98, y(13), y(13)-98, y(14), y(14)-98, y(16)++, y(17)++

**Precursor origin neutral loss:** +

## Peptide No.1156

**TPEELEDVSDLEDDHEVR**

**Confirmed sites:** @S:9

**Ambiguous sites:**

**MS/MS Fragmentation of TPEELEDVSDLEDDHEVR**

Found in **CTNA3\_MOUSE**, Catenin alpha-3 OS=Mus musculus GN=Ctnna3 PE=1 SV=2

Match to Query 6734: 2233.929402 from(745.650410,3+)

Title: Elution from: 47.433 to 47.433 scan no 4599 cid35.00 polarity:+:MA10:m1s

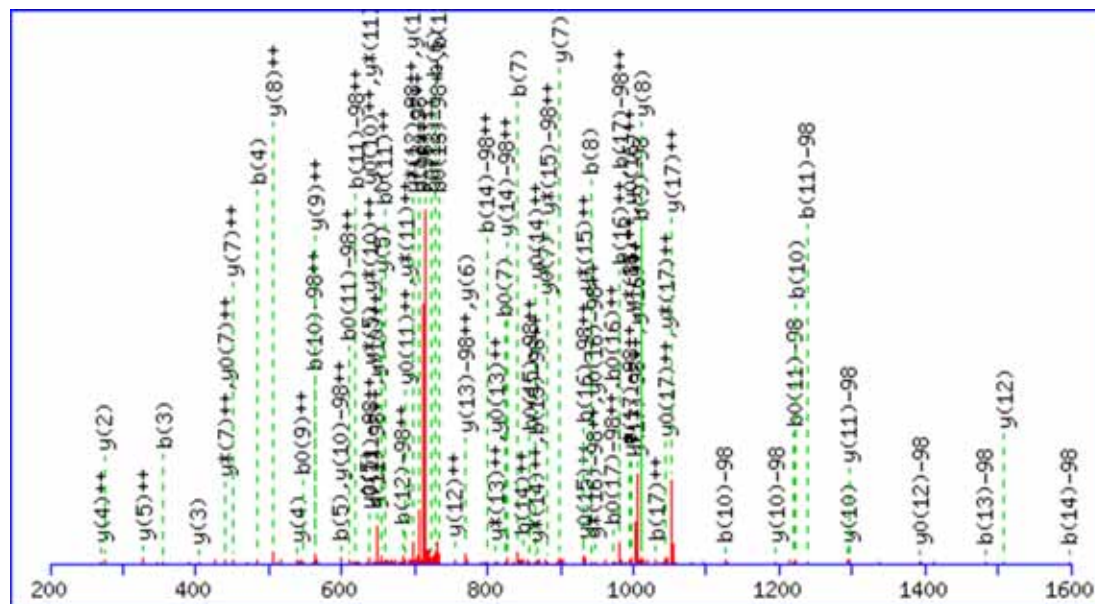

**Monoisotopic mass of neutral peptide Mr(calc):** 2233.9264

**Fixed modifications:** Carbamidomethyl (C) (apply to specified residues or termini only)

**Variable modifications:**

**N-term :** Dimethyl (N-term)

**S9 :** Phospho (ST), with neutral losses 97.9769(shown in table), 0.0000

**Ions Score:** 50 **Expect:** 0.00045

**Matched b ions:** b(3), b(4), b(5), b(6), b(7), b(8), b(9)-98, b(10)-98, b(10), b(10)-98++, b(11)-98, b(11)-98++, b(12)-98++, b(12)++, b(13)-98, b(14)-98, b(14)++, b(14)-98++, b(15)-98++, b(16)-98++, b(16)++, b(17)-98++, b(17)++

**Matched y ions:** y(2), y(3), y(4)++, y(4), y(5)++, y(5), y(6), y(7)++, y(7), y(8)++, y(8), y(9)++, y(10)++, y(10), y(10)-98++, y(10)-98, y(11)-98++, y(11)-98, y(11)++, y(12), y(12)-98++, y(12)++, y(13)-98++, y(14)-98++, y(16)++, y(17)-98++, y(17)++

**Precursor origin neutral loss:** +

## Peptide No.1157

**TPSFETALR**

**Confirmed sites:** @S:3

**Ambiguous sites:**

**MS/MS Fragmentation of** **TPSFETALR**

Found in **OBSCN\_MOUSE**, Obscurin OS=Mus musculus GN=Obscn PE=2 SV=2

Match to Query 813: 1128.521846 from(565.268199,2+)

Title: Elution from: 42.380 to 42.380 scan no 3825 cid35.00 polarity:+:MA10

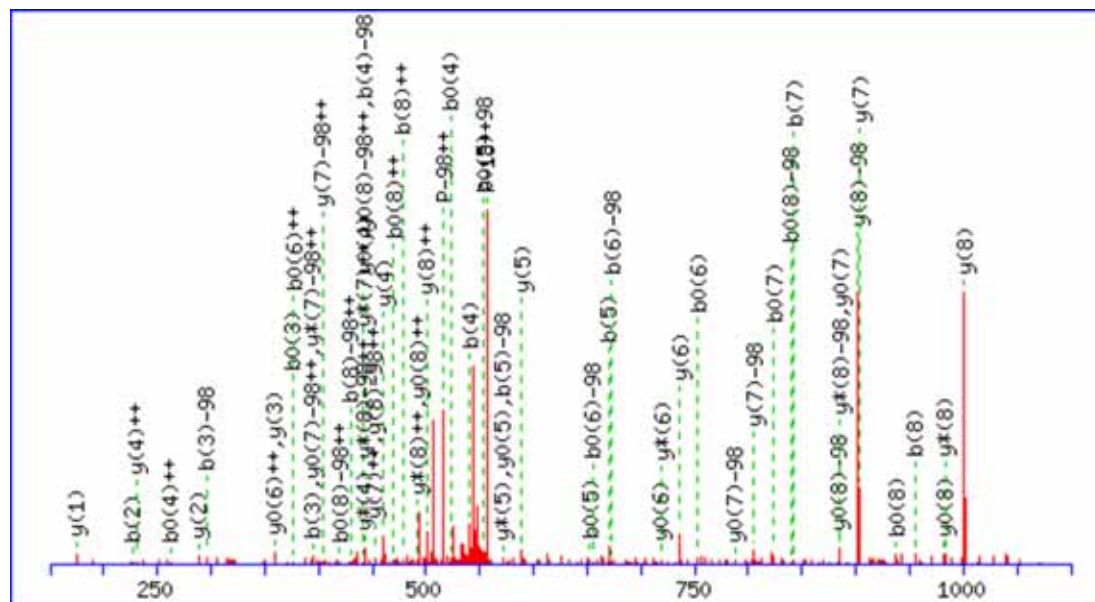

**Monoisotopic mass of neutral peptide Mr(calc):** 1128.5216

**Fixed modifications:** Carbamidomethyl (C) (apply to specified residues or termini only)

**Variable modifications:**

**N-term :** Dimethyl (N-term)

**S3 :** Phospho (ST), with neutral losses 97.9769(shown in table), 0.0000

**Ions Score:** 60 **Expect:** 2.1e-005

**Matched b ions:** b(2), b(3)-98, b(3), b(4)-98, b(4), b(5), b(5)-98, b(6)-98, b(7), b(8), b(8)-98++, b(8)++

**Matched y ions:** y(1), y(2), y(3), y(4), y(4)++, y(5), y(6), y(7)-98, y(7), y(7)++, y(7)-98++, y(8)-98, y(8), y(8)-98++, y(8)++

**Precursor origin neutral loss:** +

## Peptide No.1158

**TPSFETALR**

**Confirmed sites:** @S:3

**Ambiguous sites:**

**MS/MS Fragmentation of** **TPSFETALR**

Found in **OBSCN\_MOUSE**, Obscurin OS=Mus musculus GN=Obscn PE=2 SV=2

Match to Query 660: 1134.553100 from(568.283826,2+)

Title: Elution from: 42.339 to 42.339 scan no 3753 cid35.00 polarity:+:MA10

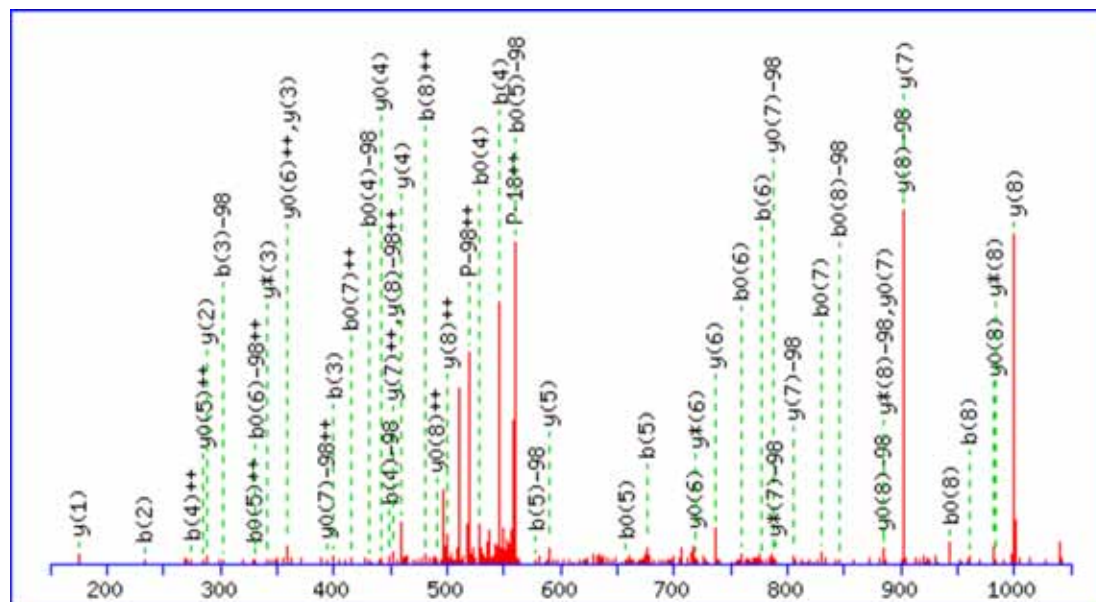

**Monoisotopic mass of neutral peptide Mr(calc):** 1134.5534

**Fixed modifications:** Carbamidomethyl (C) (apply to specified residues or termini only)

**Variable modifications:**

**N-term :** Dimethyl:2H(4)13C(2) (N-term)

**S3 :** Phospho (ST), with neutral losses 0.0000(shown in table), 97.9769

**Ions Score:** 54 **Expect:** 7.4e-005

**Matched b ions:** b(2), b(3), b(3)-98, b(4)++, b(4)-98, b(4), b(5), b(5)-98, b(6), b(8), b(8)++

**Matched y ions:** y(1), y(2), y(3), y(4), y(5), y(6), y(7)++, y(7), y(7)-98, y(8)-98, y(8), y(8)-98++, y(8)++

**Precursor origin neutral loss:** +

## Peptide No.1159

**TPSPDYDLYYYR**

**Confirmed sites:** @S:3

**Ambiguous sites:**

**MS/MS Fragmentation of TPSPDYDLYYYR**

Found in **TITIN\_MOUSE**, Titin OS=Mus musculus GN=Ttn PE=1 SV=1

Match to Query 2335: 1659.689122 from(830.851837,2+)

Title: Elution from: 50.334 to 50.334 scan no 4634 cid35.00 polarity:+:MA10:m1s



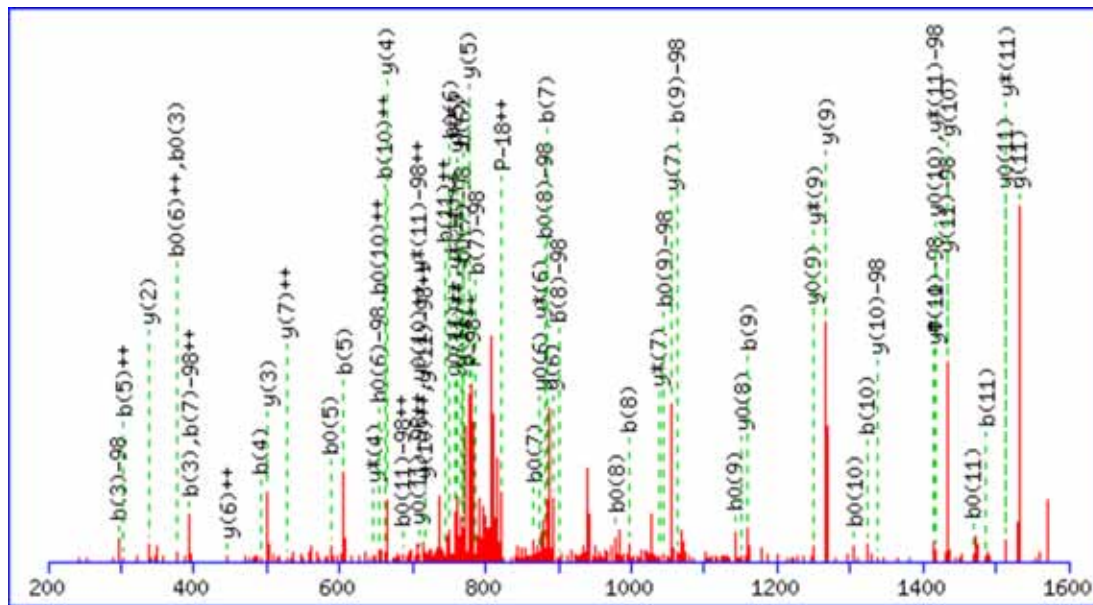

**Monoisotopic mass of neutral peptide Mr(calc):** 1659.6858

**Fixed modifications:** Carbamidomethyl (C) (apply to specified residues or termini only)

**Variable modifications:**

**N-term :** Dimethyl (N-term)

**S3 :** Phospho (ST), with neutral losses 0.0000(shown in table), 97.9769

**Ions Score:** 45 **Expect:** 0.00095

**Matched b ions:** b(3)-98, b(3), b(4), b(5), b(5)++, b(6), b(7)-98, b(7), b(7)-98, b(8), b(8)-98, b(9), b(9)-98, b(10), b(10)++, b(11)++, b(11)

**Matched y ions:** y(2), y(3), y(4), y(5), y(6), y(6)++, y(7), y(7)++, y(9), y(10), y(10)++, y(10)-98, y(11)-98, y(11), y(11)-98, y(11)++

**Precursor origin neutral loss:** +

## Peptide No.1160

**TPSPDYDLYYYR**

**Confirmed sites:** @Y:6

**Ambiguous sites:** @T:1orS:3

**MS/MS Fragmentation of TPSPDYDLYYYR**

Found in **TITIN\_MOUSE**, Titin OS=Mus musculus GN=Ttn PE=1 SV=1

Match to Query 3982: 1739.651199 from(580.891009,3+)

Title: Elution from: 56.230 to 56.230 scan no 5575 cid35.00 polarity:+:MA10



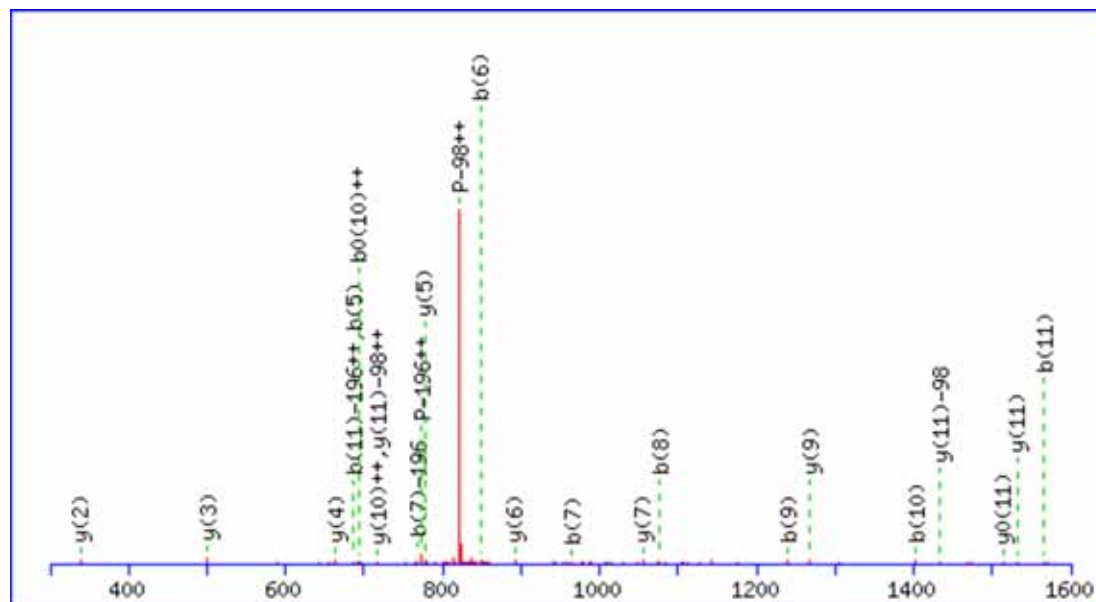

**Monoisotopic mass of neutral peptide Mr(calc):** 1739.6521

**Fixed modifications:** Carbamidomethyl (C) (apply to specified residues or termini only)

**Variable modifications:**

**N-term :** Dimethyl (N-term)

**T1 :** Phospho (ST), with neutral losses 0.0000(shown in table), 97.9769

**S3 :** Phospho (ST), with neutral losses 0.0000(shown in table), 97.9769

**Ions Score:** 29 **Expect:** 0.024

**Matched b ions:** b(5)-98, b(5), b(6), b(6)-98, b(7), b(7)-196, b(8), b(8)-98, b(9)-98, b(9), b(10), b(10)-98, b(11)-98, b(11), b(11)-196++

**Matched y ions:** y(2), y(3), y(4), y(5), y(6), y(7), y(9), y(10)++, y(11)-98, y(11)-98++, y(11)

**Precursor origin neutral loss:** +

## Peptide No.1162

**TPSPDYDLYYYR**

**Confirmed sites:** @S:3

**Ambiguous sites:**

MS/MS Fragmentation of **TPSPDYDLYYYR**

Found in **TITIN\_MOUSE**, Titin OS=Mus musculus GN=Ttn PE=1 SV=1

Match to Query 2741: 1665.719594 from(833.867073,2+)

Title: Elution from: 50.331 to 50.331 scan no 4580 cid35.00 polarity:+:MA10:m1s

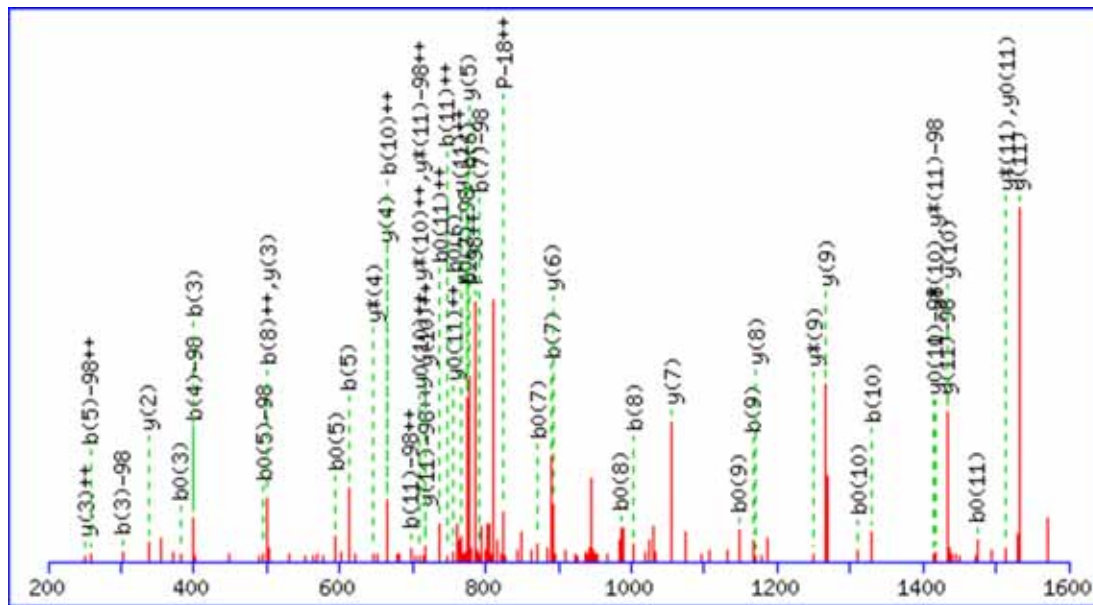

**Monoisotopic mass of neutral peptide Mr(calc):** 1665.7176

**Fixed modifications:** Carbamidomethyl (C) (apply to specified residues or termini only)

**Variable modifications:**

**N-term :** Dimethyl:2H(4)13C(2) (N-term)

**S3 :** Phospho (ST), with neutral losses 0.0000(shown in table), 97.9769

**Ions Score:** 47 **Expect:** 0.00064

**Matched b ions:** b(3), b(3)-98, b(4)-98, b(5), b(5)-98++, b(6), b(7), b(7)-98, b(8)++, b(8), b(9), b(10), b(10)++, b(11)-98++, b(11)++

**Matched y ions:** y(2), y(3), y(3)++, y(4), y(5), y(6), y(7), y(8), y(9), y(10), y(10)++, y(11)-98, y(11), y(11)-98++, y(11)++

**Precursor origin neutral loss:** +

## Peptide No.1163

**TPSPDYDLYYYR**

**Confirmed sites:** @T:1,@S:3

**Ambiguous sites:**

**MS/MS Fragmentation of TPSPDYDLYYYR**

Found in **TITIN\_MOUSE**, Titin OS=Mus musculus GN=Ttn PE=1 SV=1

Match to Query 2687: 1745.684712 from(873.849632,2+)

Title: Elution from: 56.077 to 56.077 scan no 5214 cid35.00 polarity:+:MA10



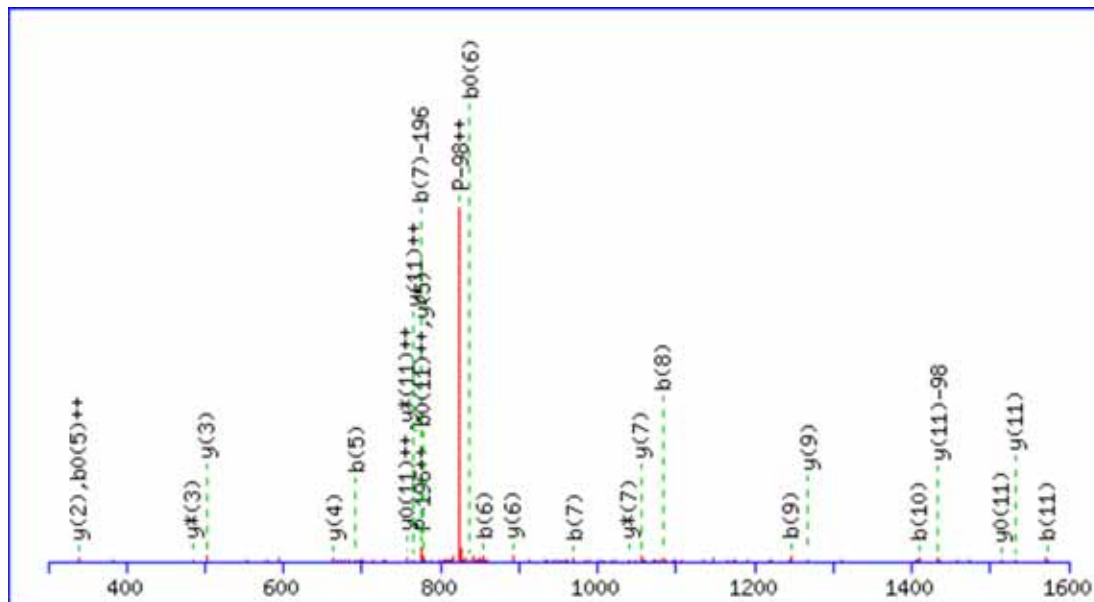

**Monoisotopic mass of neutral peptide Mr(calc):** 1745.6839

**Fixed modifications:** Carbamidomethyl (C) (apply to specified residues or termini only)

**Variable modifications:**

**N-term :** Dimethyl:2H(4)13C(2) (N-term)

**T1 :** Phospho (ST), with neutral losses 0.0000(shown in table), 97.9769

**S3 :** Phospho (ST), with neutral losses 0.0000(shown in table), 97.9769

**Ions Score:** 39 **Expect:** 0.0024

**Matched b ions:** b(3)-98, b(5)-98, b(5), b(6), b(6)-98, b(7), b(7)-196, b(8), b(8)-98, b(9)-98, b(9), b(10), b(10)-98, b(11)-98, b(11)

**Matched y ions:** y(2), y(3), y(4), y(5), y(6), y(7), y(9), y(11)-98, y(11), y(11)++

**Precursor origin neutral loss:** +

## Peptide No.1164

**TPSPIEAER**

**Confirmed sites:** @S:3

**Ambiguous sites:**

MS/MS Fragmentation of **TPSPIEAER**

Found in **TITIN\_MOUSE**, Titin OS=Mus musculus GN=Ttn PE=1 SV=1

Match to Query 727: 1106.501264 from(554.257908,2+)

Title: Elution from: 25.269 to 25.269 scan no 1527 cid35.00 polarity:+:MA10

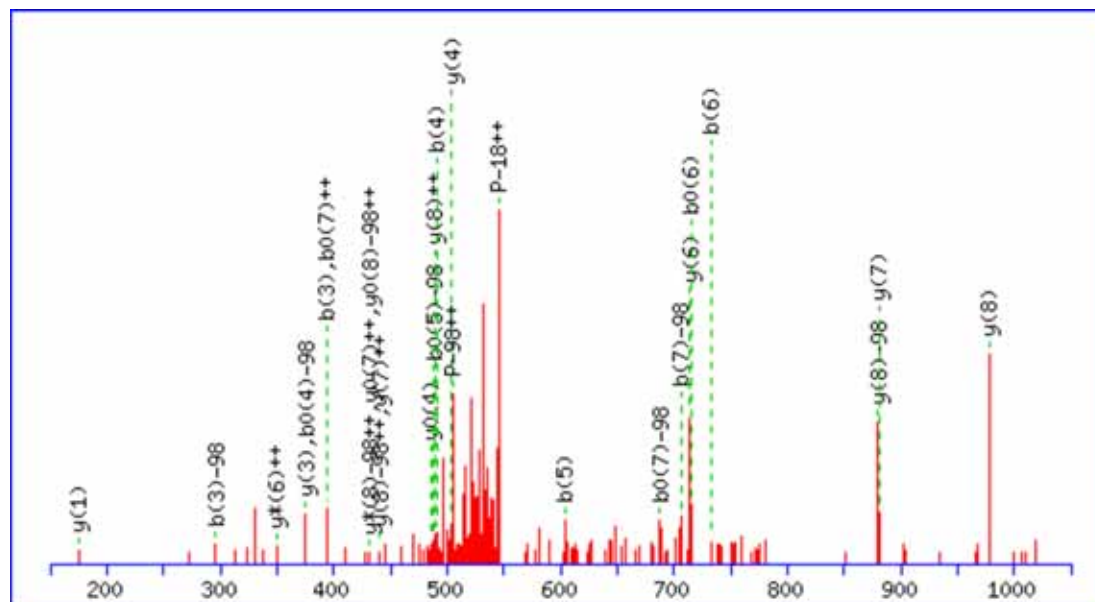

**Monoisotopic mass of neutral peptide Mr(calc):** 1106.5009

**Fixed modifications:** Carbamidomethyl (C) (apply to specified residues or termini only)

**Variable modifications:**

**N-term :** Dimethyl (N-term)

**S3 :** Phospho (ST), with neutral losses 0.0000(shown in table), 97.9769

**Ions Score:** 28 **Expect:** 0.034

**Matched b ions:** b(3), b(3)-98, b(4), b(5), b(6), b(7)-98

**Matched y ions:** y(1), y(3), y(4), y(6), y(7), y(7)++, y(8)-98, y(8), y(8)-98++, y(8)++

**Precursor origin neutral loss:** +

## Peptide No.1165

**TPVDESDDIEHDEIPTGK**

**Confirmed sites:** @S:6

**Ambiguous sites:**

**MS/MS Fragmentation of TPVDESDDIEHDEIPTGK**

Found in **MYPN\_MOUSE**, Myopalladin OS=Mus musculus GN=Mypn PE=2 SV=2

Match to Query 6080: 2260.964535 from(754.662121,3+)

Title: Elution from: 39.798 to 39.798 scan no 3446 cid35.00 polarity:+:MA10:m1s



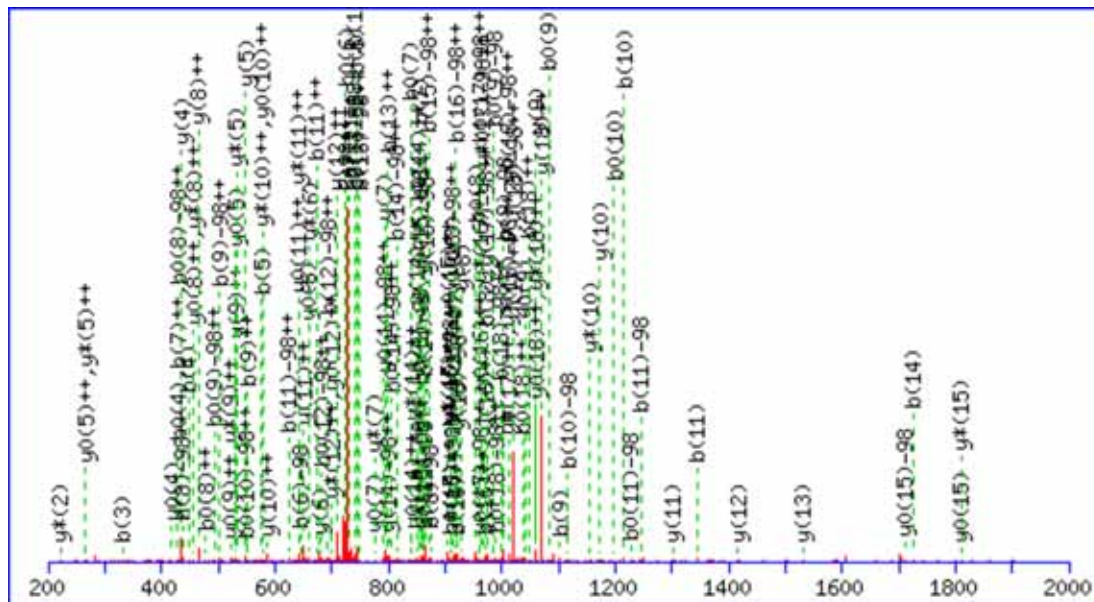

**Monoisotopic mass of neutral peptide Mr(calc):** 2273.0260

**Fixed modifications:** Carbamidomethyl (C) (apply to specified residues or termini only)

**Variable modifications:**

**N-term :** Dimethyl:2H(4)13C(2) (N-term)

**S6 :** Phospho (ST), with neutral losses 0.0000(shown in table), 97.9769

**K19 :** Dimethyl:2H(4)13C(2) (K)

**Ions Score:** 37 **Expect:** 0.013

**Matched b ions:** b(3), b(4), b(5), b(6), b(6)-98, b(7)++, b(7), b(8)-98++, b(8), b(8)-98, b(9)-98++, b(9), b(9)++, b(9)-98, b(10), b(10)-98, b(11), b(11)-98, b(11)-98++, b(11)++, b(12)++, b(12)-98++, b(13)-98++, b(13)++, b(14), b(14)++, b(14)-98++, b(15)++, b(15)-98++, b(16)-98++, b(16)++, b(18)-98++, b(18)++

**Matched y ions:** y(4), y(5), y(6), y(7), y(8)++, y(8), y(9)++, y(9), y(10)++, y(10), y(11)++, y(11), y(12)++, y(12), y(13), y(14)++, y(14)-98++, y(15)-98++, y(15)++, y(16)++, y(16)-98++, y(17)++, y(17)-98++, y(18)-98++, y(18)++

**Precursor origin neutral loss:** +

## Peptide No.1167

**TQDIEAEASEER**

**Confirmed sites: @S:9**

**Ambiguous sites:**

MS/MS Fragmentation of **TQDIEAEASEER**

Found in **SRCA\_MOUSE**, Sarcalumenin OS=Mus musculus GN=Srl PE=1 SV=1

Match to Query 2344: 1484.603392 from(743.308972,2+)

Title: Elution from: 29.419 to 29.419 scan no 2225 cid35.00 polarity:+:MA10







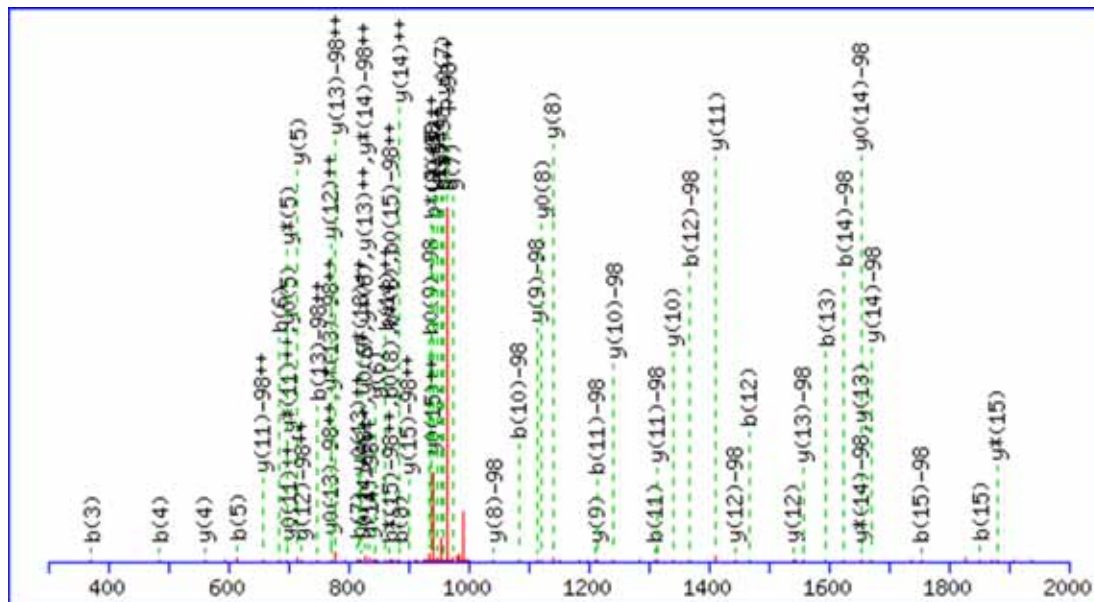

**Monoisotopic mass of neutral peptide Mr(calc):** 2025.8640

**Fixed modifications:** Carbamidomethyl (C) (apply to specified residues or termini only)

**Variable modifications:**

**N-term :** Dimethyl (N-term)

**S9 :** Phospho (ST), with neutral losses 97.9769(shown in table), 0.0000

**Ions Score:** 74 **Expect:** 2e-006

**Matched b ions:** b(3), b(4), b(5), b(6), b(7), b(8), b(9)-98, b(10)-98, b(11)-98, b(11), b(12), b(12)-98, b(13), b(13)-98++, b(14)-98, b(14)++, b(15)-98, b(15)

**Matched y ions:** y(4), y(5), y(6), y(7), y(8), y(8)-98, y(9), y(9)-98, y(10)-98, y(10), y(11)-98, y(11), y(11)-98++, y(12)-98, y(12), y(12)-98++, y(12)++, y(13)-98++, y(13)-98, y(13), y(13)++, y(14)-98++, y(14)-98, y(14)++, y(15)-98++, y(15)++

**Precursor origin neutral loss:** +

## Peptide No.1170

**TQDIEAEASEERQQR**

**Confirmed sites:** @S:9

**Ambiguous sites:**

MS/MS Fragmentation of **TQDIEAEASEERQQR**

Found in **SRCA\_MOUSE**, Sarcalumenin OS=Mus musculus GN=Srl PE=1 SV=1

Match to Query 4563: 2031.896132 from(1016.955342,2+)

Title: Elution from: 30.218 to 30.218 scan no 2039 cid35.00 polarity:+:MA10:m1s





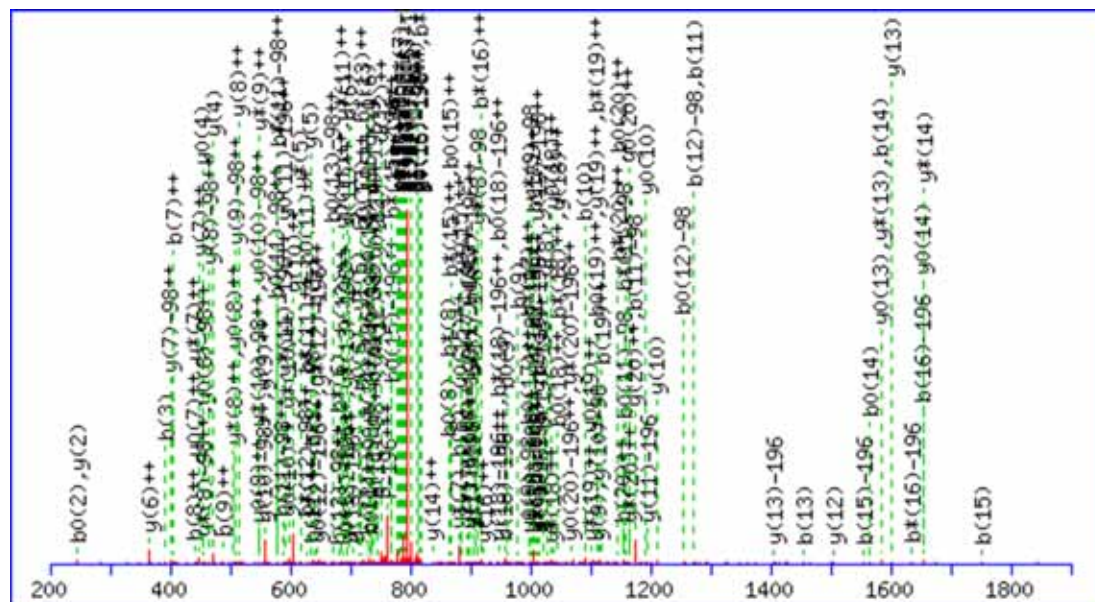

**Monoisotopic mass of neutral peptide Mr(calc):** 2481.1648

**Fixed modifications:** Carbamidomethyl (C) (apply to specified residues or termini only)

**Variable modifications:**

**N-term :** Dimethyl:2H(4)13C(2) (N-term)

**T11 :** Phospho (ST), with neutral losses 97.9769(shown in table), 0.0000

**S15 :** Phospho (ST), with neutral losses 97.9769(shown in table), 0.0000

**K17 :** Dimethyl:2H(4)13C(2) (K)

**Ions Score:** 33 **Expect:** 0.042

**Matched b ions:** b(3), b(5), b(6), b(7), b(7)++, b(8), b(8)++, b(9)++, b(9), b(10), b(11)-98, b(11), b(11)-98++, b(11)++, b(12)-98, b(12)-98++, b(12)++, b(13), b(13)-98++, b(13)++, b(14), b(14)-98++, b(14)++, b(15)-98, b(15)-196, b(15), b(15)-196++, b(16)-196, b(17)++, b(17)-98++, b(17)-196++, b(18)-98++, b(18)-196++, b(19)-98++, b(19)++, b(19)-196++, b(20)++, b(20)-98++

**Matched y ions:** y(2), y(4), y(5), y(6)++, y(6), y(7)-98++, y(7)++, y(7), y(7)-98, y(8)++, y(8)-98++, y(8), y(9)++, y(9), y(9)-98++, y(9)-98, y(10)++, y(10)-98++, y(10), y(10)-98, y(11)-98, y(11)-98++, y(11)++, y(11)-196, y(12), y(12)++, y(12)-98++, y(13)-196, y(13)++, y(13), y(13)-98++, y(13)-196++, y(14)-196++, y(14)-98++, y(14)++, y(15)-196++, y(16)++, y(16)-98++, y(17)-196++, y(18)-98++, y(18)-196++, y(18)++, y(19)-196++, y(19)-98++, y(19)++, y(20)++, y(20)-98++

**Precursor origin neutral loss:** +

## Peptide No.1172

**TREQESSGEEDNDLSPEER**

**Confirmed sites:** @S:6,@S:7

**Ambiguous sites:**

MS/MS Fragmentation of **TREQESSGEEDNDLSPEER**

Found in **IPP2\_MOUSE**, Protein phosphatase inhibitor 2 OS=Mus musculus GN=Ppp1r2 PE=1 SV=3

Match to Query 7828: 2393.890872 from(798.970900,3+)

Title: Elution from: 28.841 to 28.841 scan no 2057 cid35.00 polarity:+:MA10:m1s

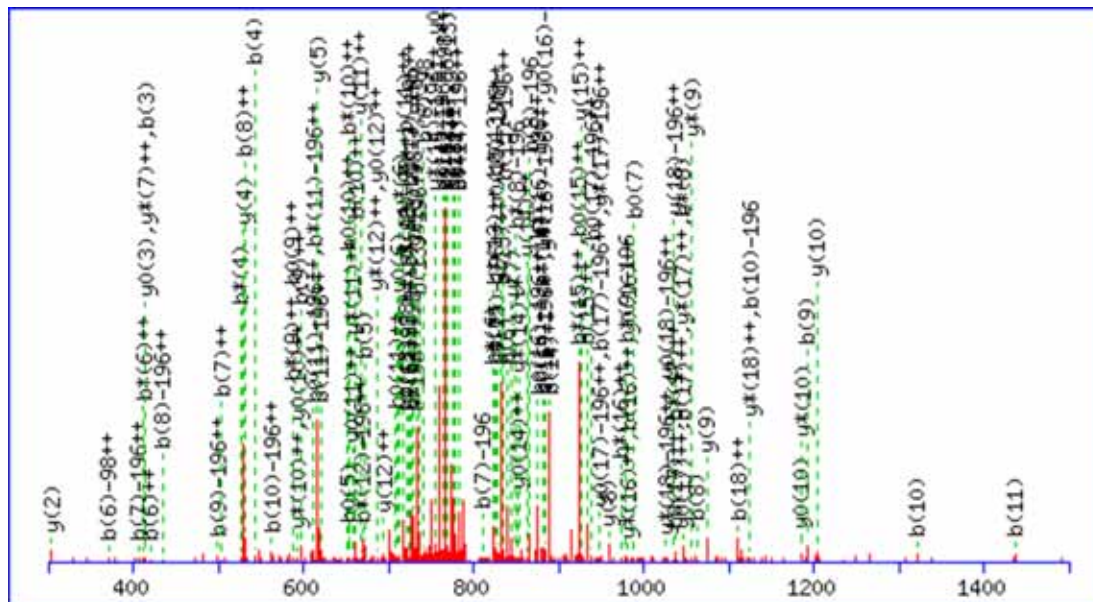

**Monoisotopic mass of neutral peptide Mr(calc):** 2393.8897

**Fixed modifications:** Carbamidomethyl (C) (apply to specified residues or termini only)

**Variable modifications:**

**N-term :** Dimethyl (N-term)

**S6 :** Phospho (ST), with neutral losses 0.0000(shown in table), 97.9769

**S7 :** Phospho (ST), with neutral losses 0.0000(shown in table), 97.9769

**Ions Score:** 43 **Expect:** 0.00091

**Matched b ions:** b(3), b(4), b(5), b(6)-98++, b(6)++, b(6)-98, b(6), b(7)-196++, b(7)++, b(7)-98, b(7)-196, b(8)-98++, b(8)++, b(8)-196, b(8)-196++, b(8)-98, b(8), b(9)-196++, b(9), b(9)++, b(9)-98++, b(10), b(10)-196++, b(10)++, b(10)-98++, b(10)-196, b(11), b(11)-98, b(11)-98++, b(11)-196++, b(11)++, b(12)++, b(12)-98++, b(13)++, b(13)-98++, b(13)-196++, b(14)++, b(14)-98++, b(15)++, b(15)-196++, b(15)-98++, b(16)-98++, b(16)-196++, b(16)++, b(17)++, b(17)-196++, b(17)-98++, b(18)++, b(18)-98++

**Matched y ions:** y(2), y(4), y(5), y(6), y(7), y(8), y(9), y(10), y(11)++, y(12)++, y(13)-98++, y(13)++, y(14)-196++, y(14)-98++, y(14)++, y(15)++, y(18)-196++, y(18)-98++

**Precursor origin neutral loss:** +

## Peptide No.1173

**TREQESSGEEDNDSPEER**

**Confirmed sites:** @T:1,@S:7

**Ambiguous sites:**

**MS/MS Fragmentation of TREQESSGEEDNDSPEER**

Found in **IPP2\_MOUSE**, Protein phosphatase inhibitor 2 OS=Mus musculus GN=Ppp1r2 PE=1 SV=3

Match to Query 6379: 2393.894106 from(798.971978,3+)

Title: Elution from: 28.812 to 28.812 scan no 1951 cid35.00 polarity:+:MA10:m1s

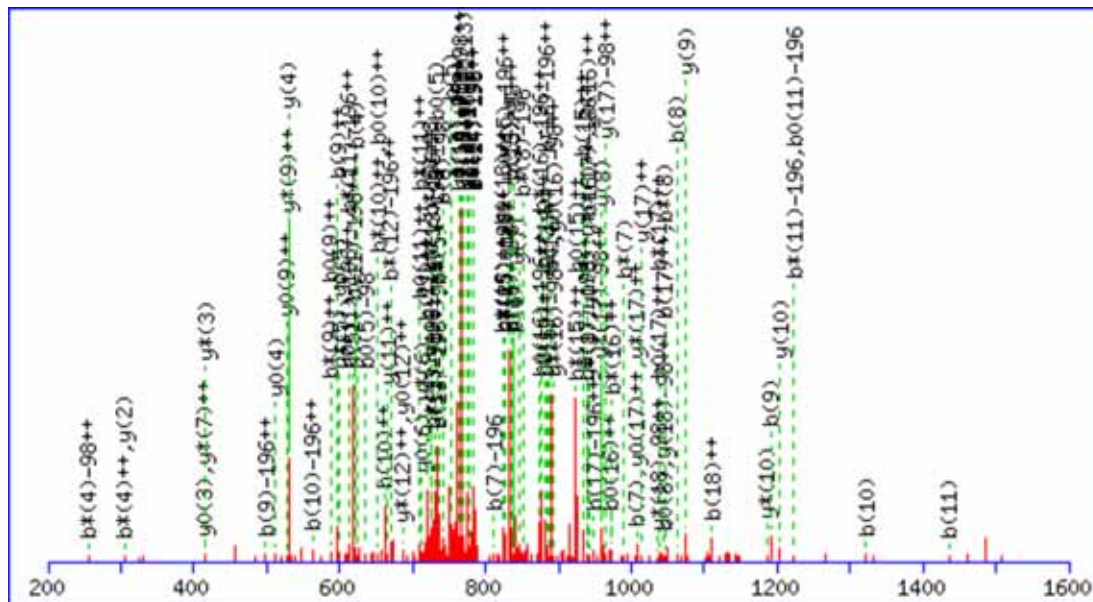

**Monoisotopic mass of neutral peptide Mr(calc):** 2393.8897

**Fixed modifications:** Carbamidomethyl (C) (apply to specified residues or termini only)

**Variable modifications:**

**N-term :** Dimethyl (N-term)

**T1 :** Phospho (ST), with neutral losses 0.0000(shown in table), 97.9769

**S7 :** Phospho (ST), with neutral losses 0.0000(shown in table), 97.9769

**Ions Score:** 37 **Expect:** 0.0042

**Matched b ions:** b(4), b(5), b(6)-98, b(6), b(7)-196, b(7)-98, b(7), b(8), b(8)-98, b(9), b(9)++, b(9)-98++, b(9)-196++, b(10), b(10)-98++, b(10)-98, b(10)++, b(10)-196++, b(11), b(11)++, b(11)-196++, b(11)-98++, b(12)++, b(12)-98++, b(13)++, b(13)-98++, b(13)-196++, b(14)++, b(14)-98++, b(15)++, b(15)-98++, b(15)-196++, b(16)-98++, b(16)-196++, b(17)-196++, b(17)++, b(18)++

**Matched y ions:** y(2), y(4), y(5), y(6), y(7), y(8), y(9), y(10), y(11)++, y(13)-98++, y(13)++, y(14)-98++, y(15)-98++, y(15)++, y(17)-98++, y(17)++, y(18)-98++

**Precursor origin neutral loss:** +

## Peptide No.1174

**TRPRSPSPVSSERSLSR**

**Confirmed sites:** @S:5,@S:7,@S:10,@S:11

**Ambiguous sites:**

MS/MS Fragmentation of **TRPRSPSPVSSERSLSR**

Found in **TITIN\_MOUSE**, Titin OS=Mus musculus GN=Ttn PE=1 SV=1

Match to Query 7478: 2245.905150 from(749.642326,3+)

Title: Elution from: 26.064 to 26.064 scan no 1679 cid35.00 polarity:+:MA10:m1s

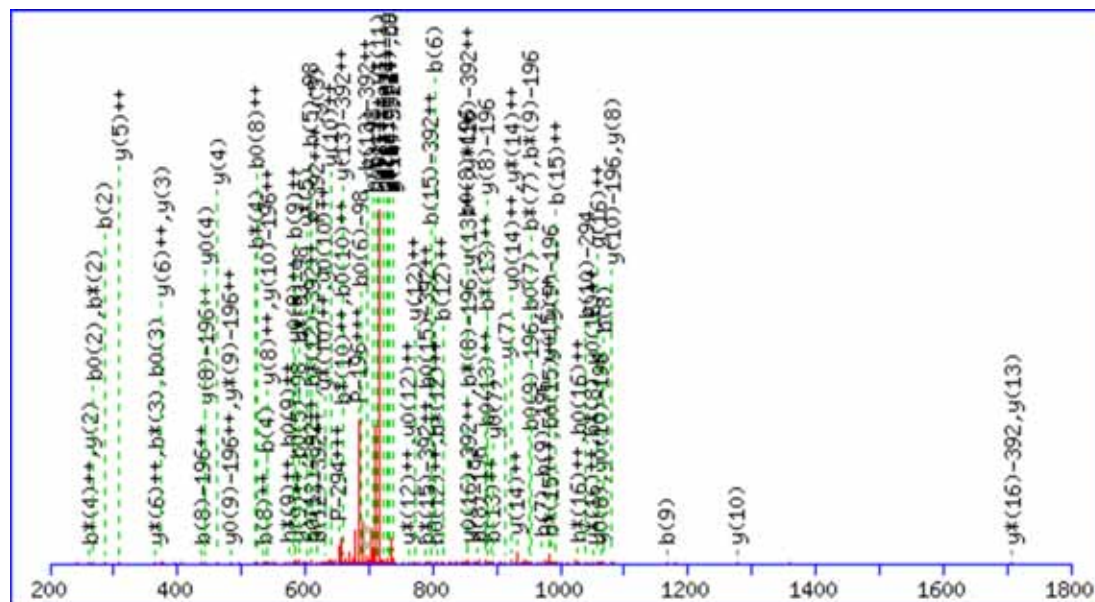

**Monoisotopic mass of neutral peptide Mr(calc):** 2245.9048

**Fixed modifications:** Carbamidomethyl (C) (apply to specified residues or termini only)

**Variable modifications:**

**N-term :** Dimethyl (N-term)

**S5 :** Phospho (ST), with neutral losses 0.0000(shown in table), 97.9769

**S7 :** Phospho (ST), with neutral losses 0.0000(shown in table), 97.9769

**S10 :** Phospho (ST), with neutral losses 0.0000(shown in table), 97.9769

**S11 :** Phospho (ST), with neutral losses 0.0000(shown in table), 97.9769

**Ions Score:** 35 **Expect:** 0.013

**Matched b ions:** b(2), b(4), b(5)-98, b(6)-98, b(6), b(7)-98++, b(7)-98, b(7), b(8)-196++, b(8)++, b(8), b(8)-196, b(9)-98++, b(9), b(9)++, b(9)-98, b(9)-196, b(10)-98++, b(10)-196++, b(10)-294, b(11)-98++, b(11)-196++, b(12)-196++, b(12)++, b(12)-392++, b(13)++, b(13)-392++, b(13)-98++, b(14)-98++, b(14)-196++, b(15)-98++, b(15)-392++, b(15)++, b(16)-196++, b(16)-98++

**Matched y ions:** y(2), y(3), y(4), y(5)++, y(5), y(6)++, y(7), y(8), y(8)-196++, y(8)++, y(8)-98, y(8)-196, y(9)++, y(9)-98, y(9)-98++, y(9)-196, y(10)-98++, y(10)-196, y(10)-98, y(10), y(10)++, y(10)-196++, y(11)-196++, y(11)-98++, y(11)++, y(12)++, y(12)-196++, y(12)-98++, y(13), y(13)-98++, y(13)++, y(13)-392++, y(13)-294++, y(14)++, y(14)-196++, y(14)-98++, y(14)-392++, y(15)-98++, y(15)++, y(15)-294++, y(15)-196++, y(16)++, y(16)-294++, y(16)-98++

**Precursor origin neutral loss:** +

## Peptide No.1175

**TSALTQGLER**

**Confirmed sites:** @T:5

**Ambiguous sites:**

MS/MS Fragmentation of **TSALTQGLER**

Found in **CG059\_MOUSE**, UPF0539 protein C7orf59 homolog OS=Mus musculus PE=2 SV=2

Match to Query 735: 1154.530622 from(578.272587,2+)

Title: Elution from: 29.946 to 29.946 scan no 2101 cid35.00 polarity:+:MA10



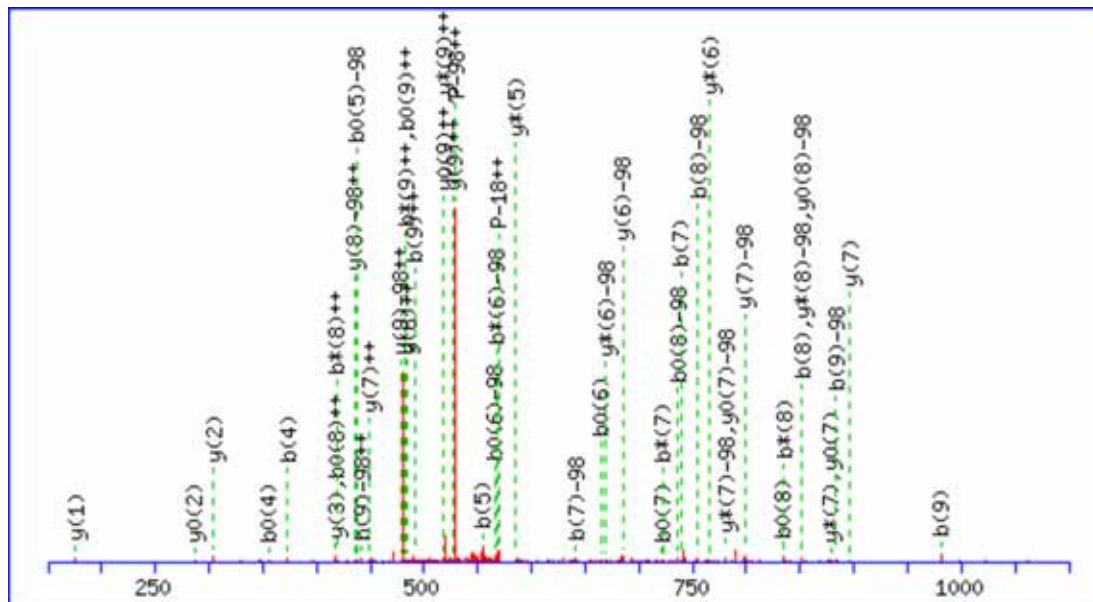

**Monoisotopic mass of neutral peptide Mr(calc):** 1154.5332

**Fixed modifications:** Carbamidomethyl (C) (apply to specified residues or termini only)

**Variable modifications:**

**T5 :** Phospho (ST), with neutral losses 97.9769(shown in table), 0.0000

**Ions Score:** 27 **Expect:** 0.042

**Matched b ions:** b(4), b(5), b(7)-98, b(7), b(8), b(8)-98, b(9), b(9)-98, b(9)-98++, b(9)++

**Matched y ions:** y(1), y(2), y(3), y(6)-98, y(7)-98, y(7), y(7)++, y(8)-98++, y(8)++, y(9)-98++, y(9)++

**Precursor origin neutral loss:** +

## Peptide No.1176

**TSEEEPEPSVSENEEVDAEEANSFQK**

**Confirmed sites:** @S:11

**Ambiguous sites:**

**MS/MS Fragmentation of TSEEEPEPSVSENEEVDAEEANSFQK**

Found in **TXLNB\_MOUSE**, Beta-taxilin OS=Mus musculus GN=Txlnb PE=2 SV=2

Match to Query 8603: 3045.250971 from(1016.090933,3+)

Title: Elution from: 47.099 to 47.099 scan no 4558 cid35.00 polarity:+:MA10:m1s

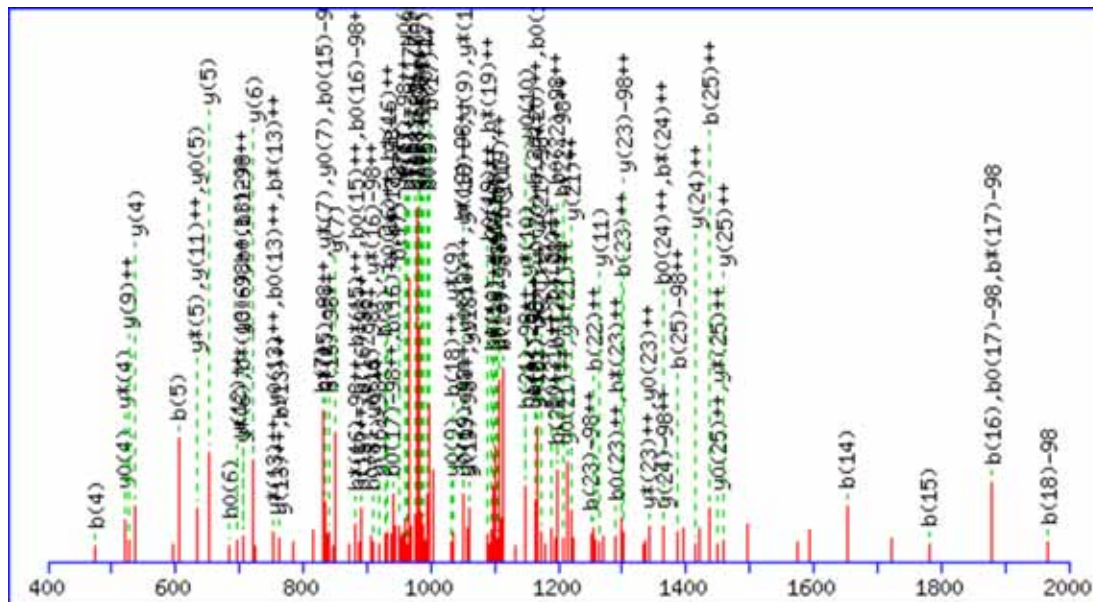

**Monoisotopic mass of neutral peptide Mr(calc):** 3045.2499

**Fixed modifications:** Carbamidomethyl (C) (apply to specified residues or termini only)

**Variable modifications:**

**N-term :** Dimethyl (N-term)

**S11 :** Phospho (ST), with neutral losses 0.0000(shown in table), 97.9769

**K26 :** Dimethyl (K)

**Ions Score:** 74 **Expect:** 2.6e-006

**Matched b ions:** b(4), b(5), b(7), b(8), b(10), b(12)++, b(13)++, b(14), b(15), b(15)++, b(15)-98++, b(16), b(16)++, b(16)-98++, b(17)++, b(17)-98++, b(18)-98, b(18)-98++, b(18)++, b(19)-98++, b(19)++, b(20)-98++, b(20)++, b(21)++, b(21)-98++, b(22)++, b(22)-98++, b(23)++, b(23)-98++, b(25)++, b(25)-98++

**Matched y ions:** y(4), y(5), y(6), y(7), y(8), y(9)++, y(9), y(10), y(11)++, y(11), y(12)++, y(13)++, y(16)++, y(16)-98++, y(17)-98++, y(18)++, y(19)++, y(19)-98++, y(20)++, y(21)++, y(21)-98++, y(23)-98++, y(24)-98++, y(24)++, y(25)++

**Precursor origin neutral loss:** +

## Peptide No.1177

**TSGGAGGLGSLR**

**Confirmed sites:** @S:10

**Ambiguous sites:**

**MS/MS Fragmentation of TSGGAGGLGSLR**

Found in **DESM\_MOUSE**, Desmin OS=Mus musculus GN=Des PE=1 SV=3

Match to Query 967: 1139.533618 from(570.774085,2+)

Title: Elution from: 32.398 to 32.398 scan no 2633 cid35.00 polarity:+:MA10

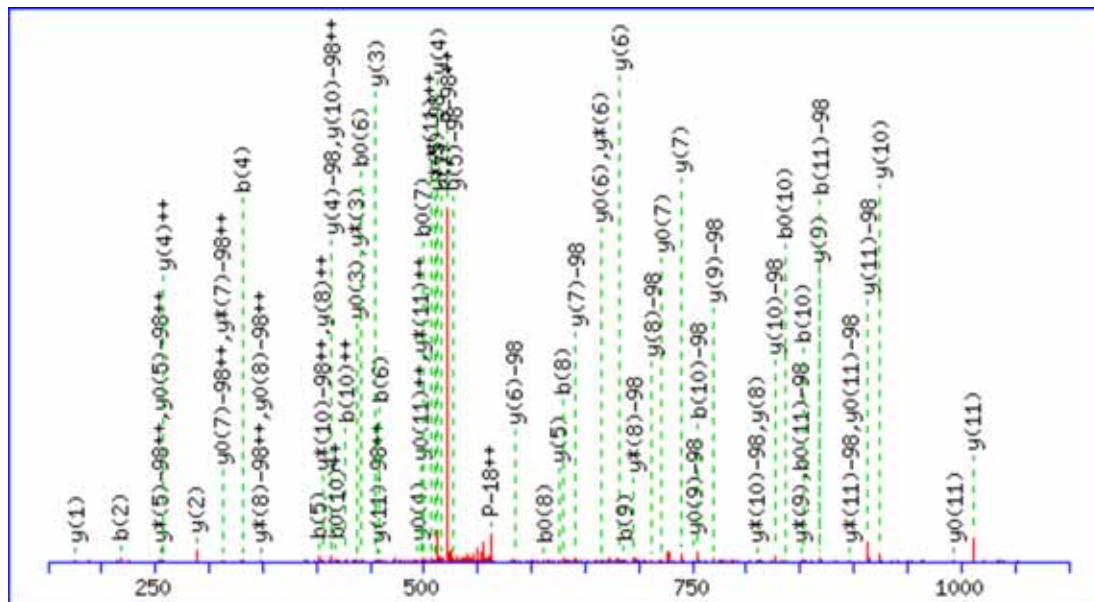

**Monoisotopic mass of neutral peptide Mr(calc): 1139.5336**

**Fixed modifications:** Carbamidomethyl (C) (apply to specified residues or termini only)

**Variable modifications:**

**N-term :** Dimethyl (N-term)

**S10 :** Phospho (ST), with neutral losses 97.9769(shown in table), 0.0000

**Ions Score:** 51 **Expect:** 0.00018

**Matched b ions:** b(2), b(4), b(5), b(6), b(7), b(8), b(9), b(10)-98, b(10)++, b(10), b(11)-98

**Matched y ions:** y(1), y(2), y(3), y(4)-98, y(4), y(4)++, y(5)-98, y(5), y(6)-98, y(6), y(7)-98, y(7), y(8), y(8)-98, y(8)++, y(9), y(9)-98, y(10)-98, y(10)-98++, y(10), y(11)-98, y(11), y(11)-98++, y(11)++

**Precursor origin neutral loss:** +

## Peptide No.1178

**TSGGAGGLGSLR**

**Confirmed sites:** @S:2

**Ambiguous sites:**

**MS/MS Fragmentation of TSGGAGGLGSLR**

Found in **DESM\_MOUSE**, Desmin OS=Mus musculus GN=Des PE=1 SV=3

Match to Query 675: 1139.533598 from(570.774075,2+)

Title: Elution from: 34.327 to 34.327 scan no 2678 cid35.00 polarity:+:MA10

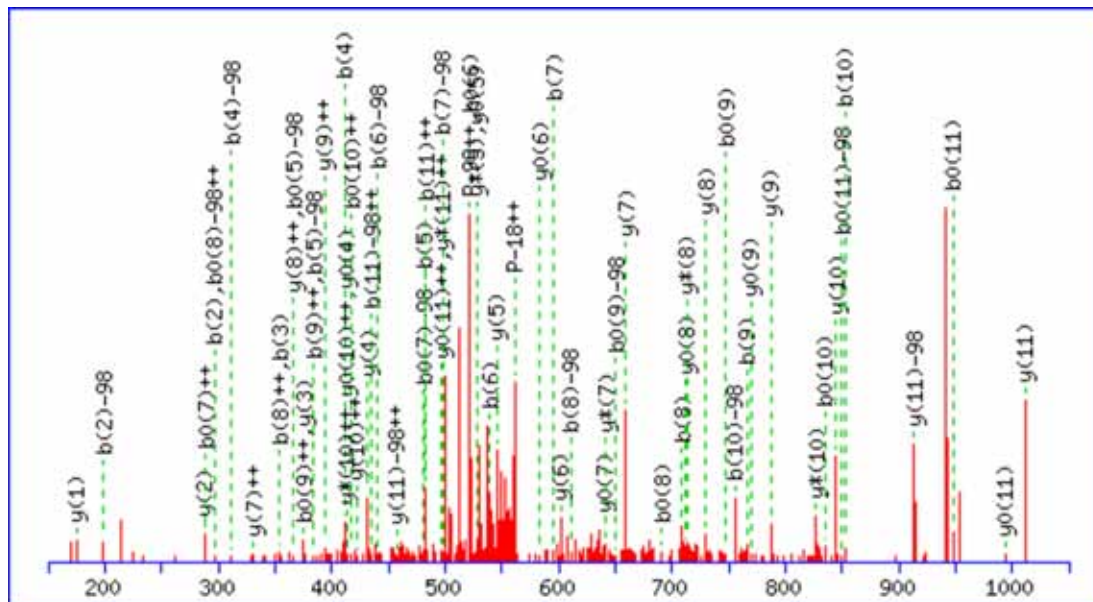

**Monoisotopic mass of neutral peptide Mr(calc):** 1139.5336

**Fixed modifications:** Carbamidomethyl (C) (apply to specified residues or termini only)

**Variable modifications:**

**N-term :** Dimethyl (N-term)

**S2 :** Phospho (ST), with neutral losses 0.0000(shown in table), 97.9769

**Ions Score:** 82 **Expect:** 1.2e-007

**Matched b ions:** b(2)-98, b(2), b(3), b(4), b(4)-98, b(5)-98, b(5), b(6)-98, b(6), b(7)-98, b(7), b(8)++, b(8), b(8)-98, b(9), b(9)++, b(10)-98, b(10), b(11)-98, b(11)++

**Matched y ions:** y(1), y(2), y(3), y(4), y(5), y(6), y(7), y(7)++, y(8), y(8)++, y(9), y(9)++, y(10), y(10)++, y(11), y(11)-98, y(11)-98++

**Precursor origin neutral loss:** +

## Peptide No.1179

**TSGGAGGLGSLR**

**Confirmed sites:** @S:2

**Ambiguous sites:**

MS/MS Fragmentation of **TSGGAGGLGSLR**

Found in **DESM\_MOUSE**, Desmin OS=Mus musculus GN=Des PE=1 SV=3

Match to Query 689: 1145.565990 from(573.790271,2+)

Title: Elution from: 34.467 to 34.467 scan no 2698 cid35.00 polarity:+:MA10



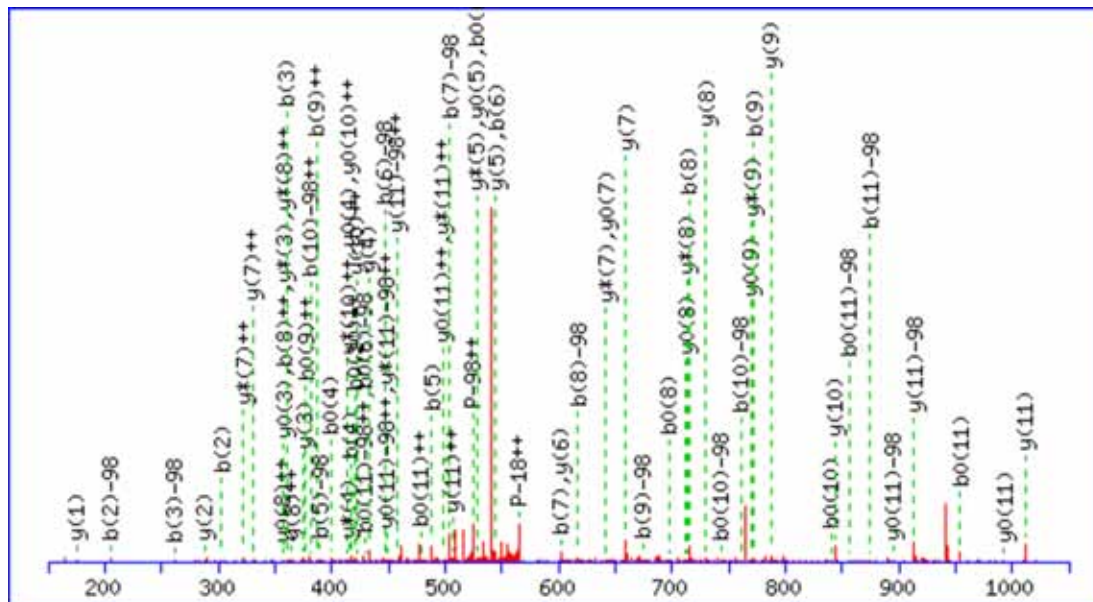

**Monoisotopic mass of neutral peptide Mr(calc):** 1145.5654

**Fixed modifications:** Carbamidomethyl (C) (apply to specified residues or termini only)

**Variable modifications:**

**N-term :** Dimethyl:2H(4)13C(2) (N-term)

**S2 :** Phospho (ST), with neutral losses 97.9769(shown in table), 0.0000

**Ions Score:** 49 **Expect:** 0.00037

**Matched b ions:** b(2)-98, b(2), b(3), b(3)-98, b(4), b(5)-98, b(5), b(6)-98, b(6), b(7), b(7)-98, b(8), b(8)-98, b(8)++, b(9), b(9)++, b(9)-98, b(10)-98++, b(10)-98, b(11)-98

**Matched y ions:** y(1), y(2), y(3), y(4), y(5), y(6), y(7), y(7)++, y(8), y(8)++, y(9), y(10), y(10)++, y(11), y(11)-98, y(11)-98++, y(11)++

**Precursor origin neutral loss:** +

## Peptide No.1180

**TSLASLR**

**Confirmed sites:** @S:2

**Ambiguous sites:**

MS/MS Fragmentation of **TSLASLR**

Found in **JPH1\_MOUSE**, Junctophilin-1 OS=Mus musculus GN=Jph1 PE=1 SV=1

Match to Query 238: 854.426086 from(428.220319,2+)

Title: Elution from: 37.400 to 37.400 scan no 3086 cid35.00 polarity:+:MA10

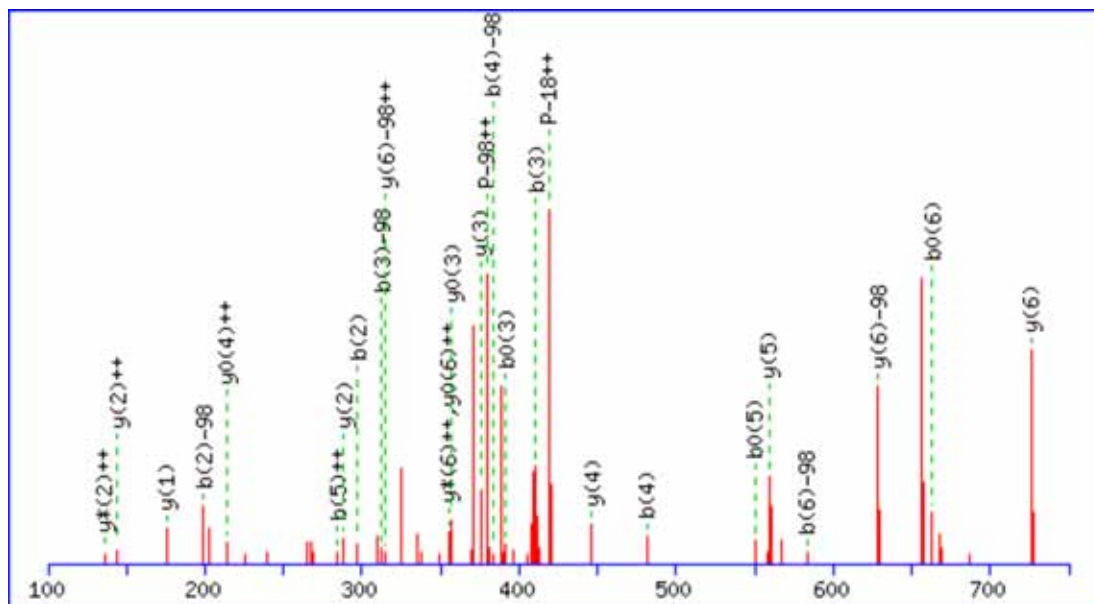

**Monoisotopic mass of neutral peptide Mr(calc):** 854.4263

**Fixed modifications:** Carbamidomethyl (C) (apply to specified residues or termini only)

**Variable modifications:**

**N-term :** Dimethyl (N-term)

**S2 :** Phospho (ST), with neutral losses 97.9769(shown in table), 0.0000

**Ions Score:** 32 **Expect:** 0.023

**Matched b ions:** b(2)-98, b(2), b(3), b(3)-98, b(4), b(4)-98, b(5)++, b(6)-98

**Matched y ions:** y(1), y(2), y(2)++, y(3), y(4), y(5), y(6)-98, y(6), y(6)-98++

**Precursor origin neutral loss:** +

## Peptide No.1181

**TSSSIVSVPASSTSGSPSR**

**Confirmed sites:** @S:2

**Ambiguous sites:**

**MS/MS Fragmentation of TSSSIVSVPASSTSGSPSR**

Found in **ABLM2\_MOUSE**, Actin-binding LIM protein 2 OS=Mus musculus GN=Ablim2 PE=1 SV=1

Match to Query 5128: 2029.920428 from(1015.967490,2+)

Title: Elution from: 38.408 to 38.408 scan no 3259 cid35.00 polarity:+:MA10:m1s

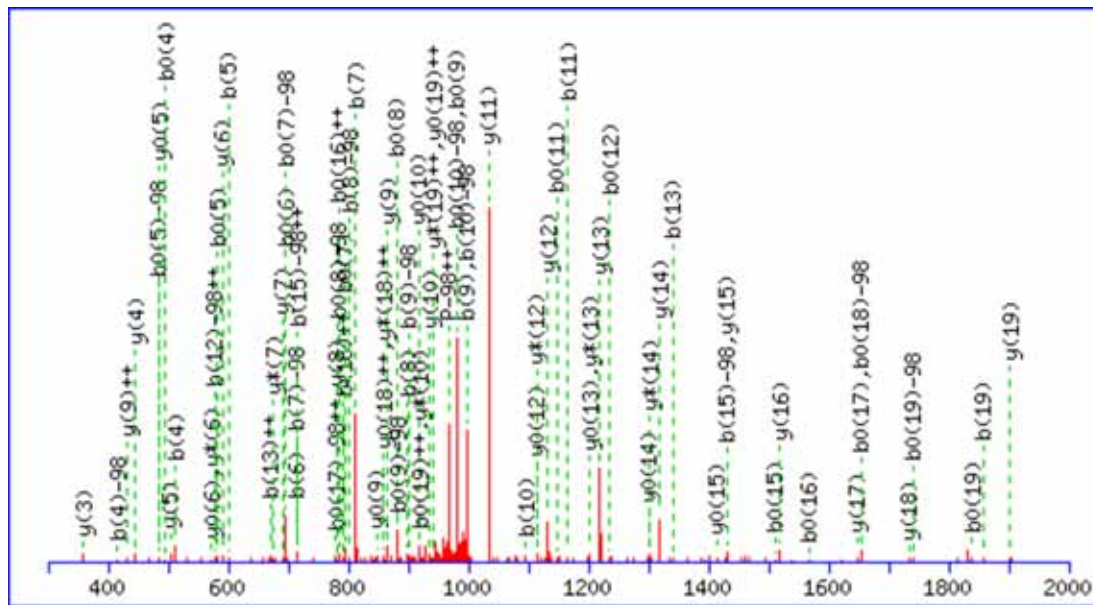

**Monoisotopic mass of neutral peptide Mr(calc):** 2029.9205

**Fixed modifications:** Carbamidomethyl (C) (apply to specified residues or termini only)

**Variable modifications:**

**N-term :** Dimethyl (N-term)

**S2 :** Phospho (ST), with neutral losses 0.0000(shown in table), 97.9769

**Ions Score:** 94 **Expect:** 2.6e-008

**Matched b ions:** b(4), b(4)-98, b(5), b(6), b(7), b(7)-98, b(8)-98, b(8), b(9), b(9)-98, b(10)-98, b(10), b(11), b(12)-98++, b(13)++, b(13), b(15)-98, b(15)-98++, b(16)++, b(19)

**Matched y ions:** y(3), y(4), y(5), y(6), y(7), y(8), y(9)++, y(9), y(10), y(11), y(12), y(13), y(14), y(15), y(16), y(17), y(18), y(19)

**Precursor origin neutral loss:** +

## Peptide No.1182

**TSSSIVSVPASSTSGSPSR**

**Confirmed sites:**

**Ambiguous sites:** @S:2orS:3

MS/MS Fragmentation of **TSSSIVSVPASSTSGSPSR**

Found in **ABLM2\_MOUSE**, Actin-binding LIM protein 2 OS=Mus musculus GN=Ablim2 PE=1 SV=1

Match to Query 5321: 2029.922266 from(1015.968409,2+)

Title: Elution from: 38.477 to 38.477 scan no 3300 cid35.00 polarity:+:MA10:m1s

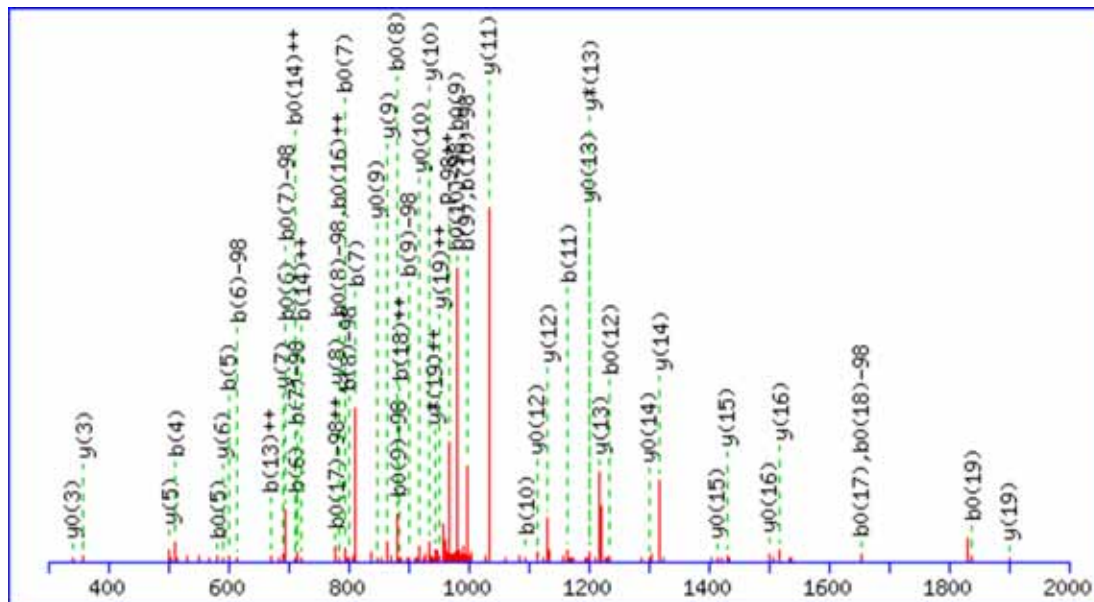

**Monoisotopic mass of neutral peptide Mr(calc):** 2029.9205

**Fixed modifications:** Carbamidomethyl (C) (apply to specified residues or termini only)

**Variable modifications:**

**N-term :** Dimethyl (N-term)

**S3 :** Phospho (ST), with neutral losses 0.0000(shown in table), 97.9769

**Ions Score:** 83 **Expect:** 3.5e-007

**Matched b ions:** b(4), b(5), b(6)-98, b(6), b(7), b(7)-98, b(8)-98, b(9), b(9)-98, b(10)-98, b(10), b(11), b(13)++, b(14)++, b(18)++

**Matched y ions:** y(3), y(5), y(6), y(7), y(8), y(9), y(10), y(11), y(12), y(13), y(14), y(15), y(16), y(19), y(19)++

**Precursor origin neutral loss:** +

## Peptide No.1183

**TSSSIVSVPASSTSGSPSR**

**Confirmed sites:**

**Ambiguous sites:** @T:1orS:2, @S:17orS:19

MS/MS Fragmentation of **TSSSIVSVPASSTSGSPSR**

Found in **ABLM2\_MOUSE**, Actin-binding LIM protein 2 OS=Mus musculus GN=Ablim2 PE=1 SV=1

Match to Query 6959: 2109.883504 from(1055.949028,2+)

Title: Elution from: 41.696 to 41.696 scan no 3876 cid35.00 polarity:+:MA10:m1s



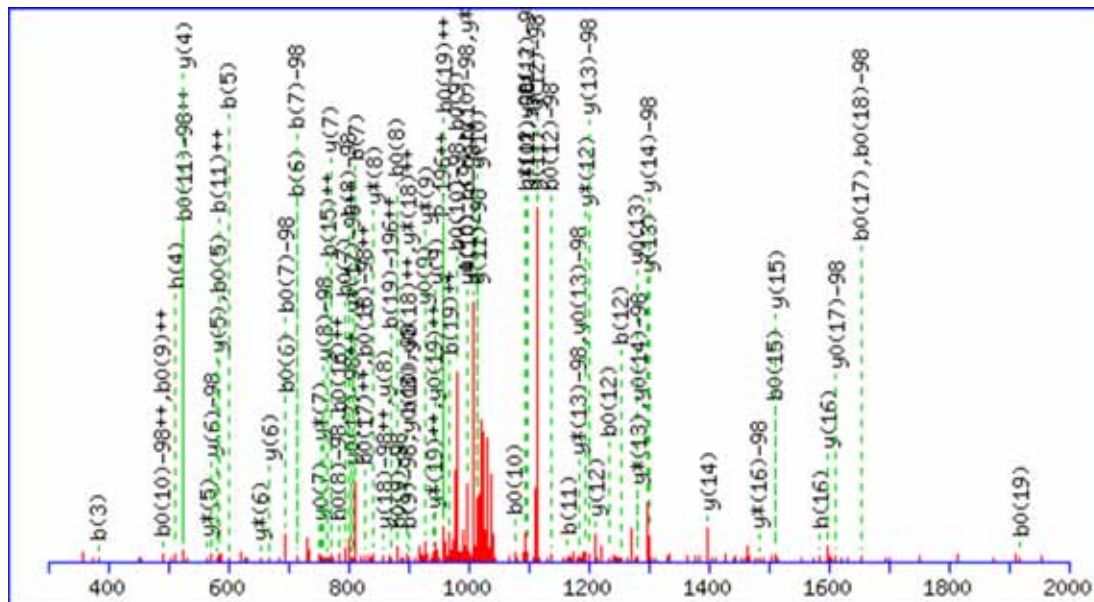

**Monoisotopic mass of neutral peptide Mr(calc):** 2109.8868

**Fixed modifications:** Carbamidomethyl (C) (apply to specified residues or termini only)

**Variable modifications:**

**N-term :** Dimethyl (N-term)

**T1 :** Phospho (ST), with neutral losses 0.0000(shown in table), 97.9769

**S19 :** Phospho (ST), with neutral losses 0.0000(shown in table), 97.9769

**Ions Score:** 31 **Expect:** 0.031

**Matched b ions:** b(3), b(4), b(5), b(6), b(7), b(7)-98, b(8)-98, b(8), b(9), b(9)-98, b(10), b(10)-98, b(11)++, b(11), b(12), b(15)++, b(16), b(19)-98++, b(19)-196++, b(19)++

**Matched y ions:** y(4), y(5), y(6)-98, y(6), y(7), y(8)-98, y(8), y(9), y(10), y(11), y(11)-98, y(12), y(12)-98, y(13), y(13)-98, y(14), y(14)-98, y(15), y(16), y(18)-98++

**Precursor origin neutral loss:** +

## Peptide No.1184

**TSSSIVSVPASSTSGSPSR**

**Confirmed sites:** @S:2

**Ambiguous sites:**

MS/MS Fragmentation of **TSSSIVSVPASSTSGSPSR**

Found in **ABLM2\_MOUSE**, Actin-binding LIM protein 2 OS=Mus musculus GN=Ablim2 PE=1 SV=1

Match to Query 5143: 2035.956144 from(1018.985348,2+)

Title: Elution from: 38.416 to 38.416 scan no 3260 cid35.00 polarity:+:MA10:m1s

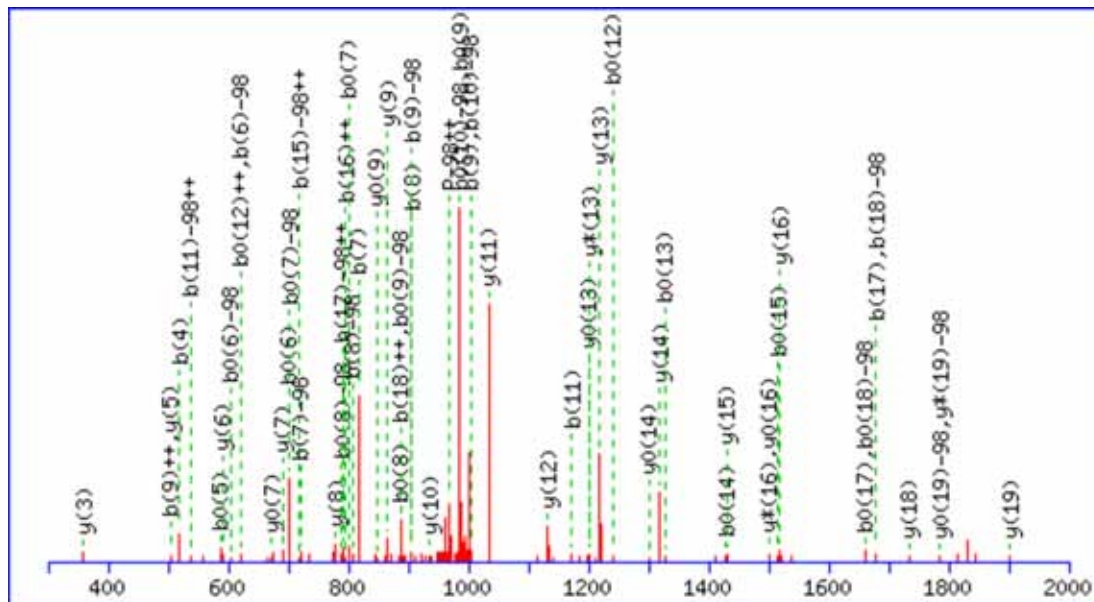

**Monoisotopic mass of neutral peptide Mr(calc):** 2035.9523

**Fixed modifications:** Carbamidomethyl (C) (apply to specified residues or termini only)

**Variable modifications:**

**N-term :** Dimethyl:2H(4)13C(2) (N-term)

**S2 :** Phospho (ST), with neutral losses 0.0000(shown in table), 97.9769

**Ions Score:** 99 **Expect:** 9.2e-009

**Matched b ions:** b(4), b(6)-98, b(7), b(7)-98, b(8), b(8)-98, b(9)++, b(9)-98, b(9), b(10)-98, b(11)-98++, b(11), b(15)-98++, b(16)++, b(17), b(17)-98++, b(18)++, b(18)-98

**Matched y ions:** y(3), y(5), y(6), y(7), y(8), y(9), y(10), y(11), y(12), y(13), y(14), y(15), y(16), y(18), y(19)

**Precursor origin neutral loss:** +

## Peptide No.1185

**TSSSIVSVPASSTSGSPSR**

**Confirmed sites:** @S:3

**Ambiguous sites:**

**MS/MS Fragmentation of TSSSIVSVPASSTSGSPSR**

Found in **ABLM2\_MOUSE**, Actin-binding LIM protein 2 OS=Mus musculus GN=Ablim2 PE=1 SV=1

Match to Query 5336: 2035.953180 from(1018.983866,2+)

Title: Elution from: 38.552 to 38.552 scan no 3310 cid35.00 polarity:+:MA10:m1s

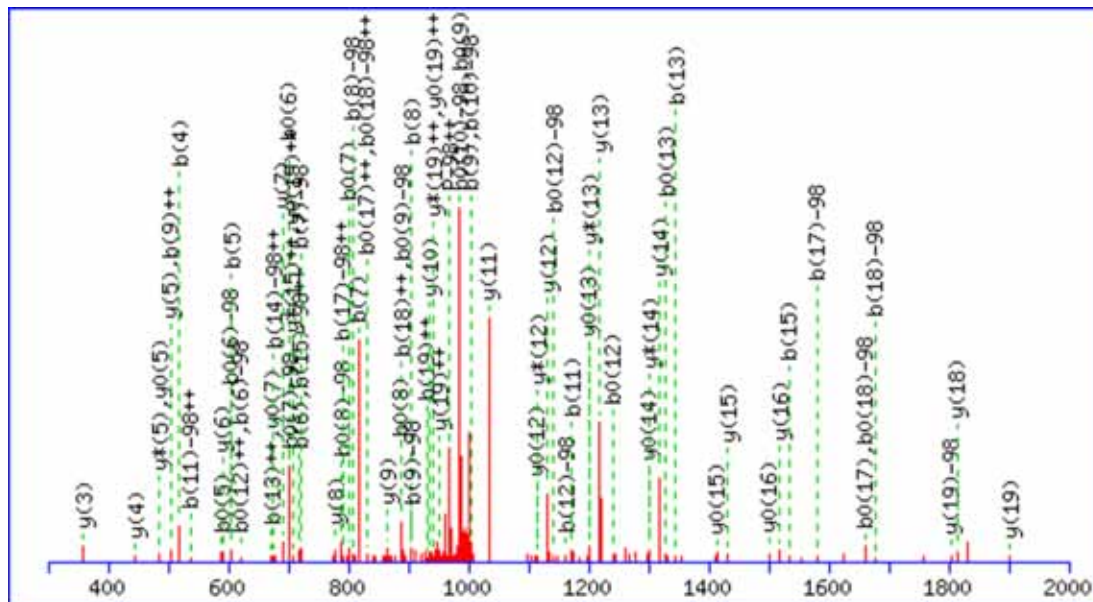

**Monoisotopic mass of neutral peptide Mr(calc):** 2035.9523

**Fixed modifications:** Carbamidomethyl (C) (apply to specified residues or termini only)

**Variable modifications:**

**N-term :** Dimethyl:2H(4)13C(2) (N-term)

**S3 :** Phospho (ST), with neutral losses 0.0000(shown in table), 97.9769

**Ions Score:** 87 **Expect:** 1.4e-007

**Matched b ions:** b(4), b(5), b(6)-98, b(6), b(7), b(7)-98, b(8)-98, b(8), b(9)++, b(9)-98, b(9), b(10)-98, b(11)-98++, b(11), b(12)-98, b(13)++, b(13), b(14)-98++, b(15), b(15)-98++, b(17)-98, b(17)-98++, b(18)++, b(18)-98, b(19)++

**Matched y ions:** y(3), y(4), y(5), y(6), y(7), y(8), y(9), y(10), y(11), y(12), y(13), y(14), y(15), y(16), y(18), y(19), y(19)-98, y(19)++

**Precursor origin neutral loss:** +

## Peptide No.1186

**TSSFTDQLDDVTPNR**

**Confirmed sites:** @S:3

**Ambiguous sites:**

MS/MS Fragmentation of **TSSFTDQLDDVTPNR**

Found in **GOGA4\_MOUSE**, Golgin subfamily A member 4 OS=Mus musculus GN=Golga4 PE=1 SV=2

Match to Query 4344: 1802.774780 from(902.394666,2+)

Title: Elution from: 47.107 to 47.107 scan no 4559 cid35.00 polarity:+:MA10





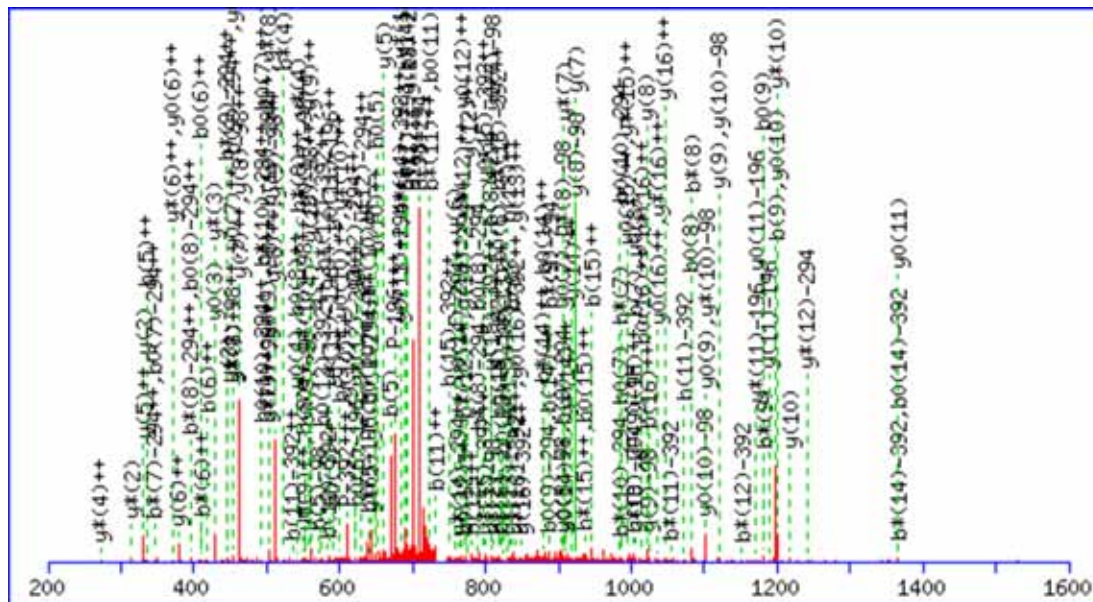

**Monoisotopic mass of neutral peptide Mr(calc):** 2218.8966

**Fixed modifications:** Carbamidomethyl (C) (apply to specified residues or termini only)

**Variable modifications:**

**N-term :** Dimethyl (N-term)

**S3 :** Phospho (ST), with neutral losses 0.0000(shown in table), 97.9769

**K4 :** Dimethyl (K)

**S6 :** Phospho (ST), with neutral losses 0.0000(shown in table), 97.9769

**S7 :** Phospho (ST), with neutral losses 0.0000(shown in table), 97.9769

**S11 :** Phospho (ST), with neutral losses 0.0000(shown in table), 97.9769

**K17 :** Dimethyl (K)

**Ions Score:** 29 **Expect:** 0.045

**Matched b ions:** b(5), b(5)++, b(5)-98, b(6)-98, b(6), b(6)++, b(6)-196, b(7), b(7)-98, b(7)++, b(7)-98, b(7)-294, b(7)-196, b(8)-98, b(8)-196, b(8)-196++, b(8)-98, b(8)++, b(8)-294, b(9)-98, b(9), b(9)-196, b(9)-294, b(9)-196++, b(9)-294, b(9)-98, b(9)++, b(10)-196, b(10)-98, b(10)-294, b(10)-294, b(10)-196, b(10)++, b(10)-98, b(10)-98, b(11)-98, b(11)-196, b(11)-196, b(11)-196++, b(11)-392, b(11)-98, b(11)++, b(11)-392, b(12)-196, b(12)++, b(12)-294, b(12)-392, b(12)-196, b(12)-98, b(12)-98, b(13)-294, b(13)-196, b(13)-98, b(13)++, b(14)-392, b(14)++, b(14)-98, b(14)-196, b(14)-196, b(15)++, b(15)-98, b(15)-98, b(15)-392, b(15)-294, b(15)-196, b(15)-196, b(16)-98, b(16)-294, b(16)-196, b(16)++

**Matched y ions:** y(2), y(3), y(4), y(5)++, y(5), y(6)++, y(6), y(7)++, y(7), y(8)-98, y(8)++, y(8), y(8)-98, y(9)-98, y(9)++, y(9), y(9)-98, y(10)++, y(10)-98, y(10)-98, y(10), y(11)++, y(11)-98, y(11)-196, y(12)-294, y(12)-196, y(12)-98, y(12)++, y(13)-98, y(13)-294, y(13)++, y(14)-98, y(14)-294, y(14)-196, y(14)++, y(15)++, y(15)-196, y(15)-392, y(15)-294, y(15)-98, y(16)-98, y(16)++, y(16)-392, y(16)-294, y(16)-196

**Precursor origin neutral loss:** +

## Peptide No.1188

TSSKESSVPSPTLDRK

Confirmed sites: @S:6,@S:7,@S:11

Ambiguous sites:

MS/MS Fragmentation of **TSSKESSPVPSPTLDRK**

Found in **SPTB2\_MOUSE**, Spectrin beta chain, brain 1 OS=Mus musculus GN=Sptbn1 PE=1 SV=2

Match to Query 5036: 2138.931195 from(713.984341,3+)

Title: Elution from: 30.179 to 30.179 scan no 2149 cid35.00 polarity:+:MA10

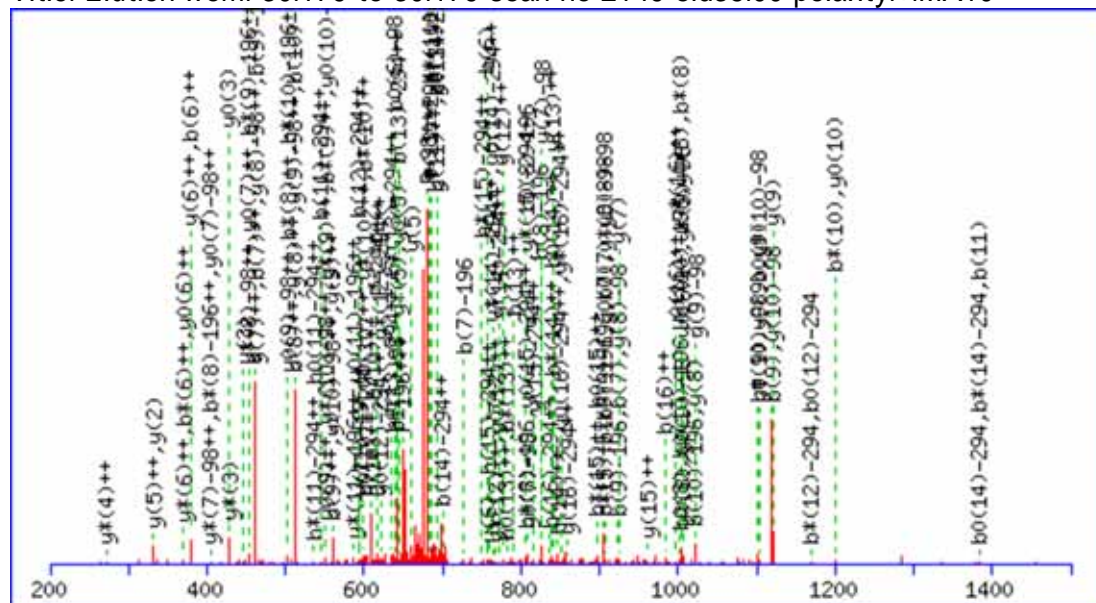

**Monoisotopic mass of neutral peptide Mr(calc): 2138.9303**

**Fixed modifications:** Carbamidomethyl (C) (apply to specified residues or termini only)

**Variable modifications:**

**N-term :** Dimethyl (N-term)

**K4 :** Dimethyl (K)

**S6 :** Phospho (ST), with neutral losses 0.0000(shown in table), 97.9769

**S7 :** Phospho (ST), with neutral losses 0.0000(shown in table), 97.9769

**S11 :** Phospho (ST), with neutral losses 0.0000(shown in table), 97.9769

**K17 :** Dimethyl (K)

**Ions Score: 30 Expect: 0.048**

**Matched b ions:** b(6)++, b(6), b(7)++, b(7)-98, b(7), b(7)-196, b(8)-98++, b(8)++, b(8)-196, b(8)-98, b(9)-196++, b(9)-98++, b(9)-98, b(9), b(9)++, b(9)-196, b(10)-196++, b(10)-196, b(10)-98, b(10)-98++, b(10)++, b(11)-98, b(11), b(11)-98++, b(11)-294++, b(11)-196++, b(11)++, b(12)-196, b(12)-98, b(12)-196++, b(12)-294++, b(12)-98++, b(13)-294++, b(13)-196++, b(13)++, b(14)++, b(14)-294++, b(14)-196++, b(14)-98++, b(15)++, b(15)-98++, b(15)-196++, b(15)-294++, b(16)++, b(16)-294++

**Matched y ions:** y(2), y(3), y(5)++, y(5), y(6)++, y(6), y(7)++, y(7)-98, y(7), y(8)-98++, y(8)++, y(8), y(8)-98, y(9)-98++, y(9)++, y(9), y(9)-98, y(10)-98, y(10)-98++, y(10)++, y(11)-196++, y(11)-98++, y(11)++, y(12)-196++, y(12)-98++, y(12)++, y(13)-294++, y(13)-98++, y(13)++, y(14)-294++, y(15)-294++, y(15)-196++, y(15)-98++, y(15)++, y(16)++, y(16)-196++, y(16)-294++, y(16)-98++

**Precursor origin neutral loss: +**

**Peptide No.1189**

**TSSKESSPVPSPTLDRK**

**Confirmed sites: @T:1,@S:2,@T:13**

**Ambiguous sites:**

MS/MS Fragmentation of **TSSKESPVPSPTLDRK**

Found in **SPTB2\_MOUSE**, Spectrin beta chain, brain 1 OS=Mus musculus GN=Sptbn1 PE=1 SV=2

Match to Query 6995: 2138.931111 from(713.984313,3+)

Title: Elution from: 30.073 to 30.073 scan no 2227 cid35.00 polarity:+:MA10:m1s

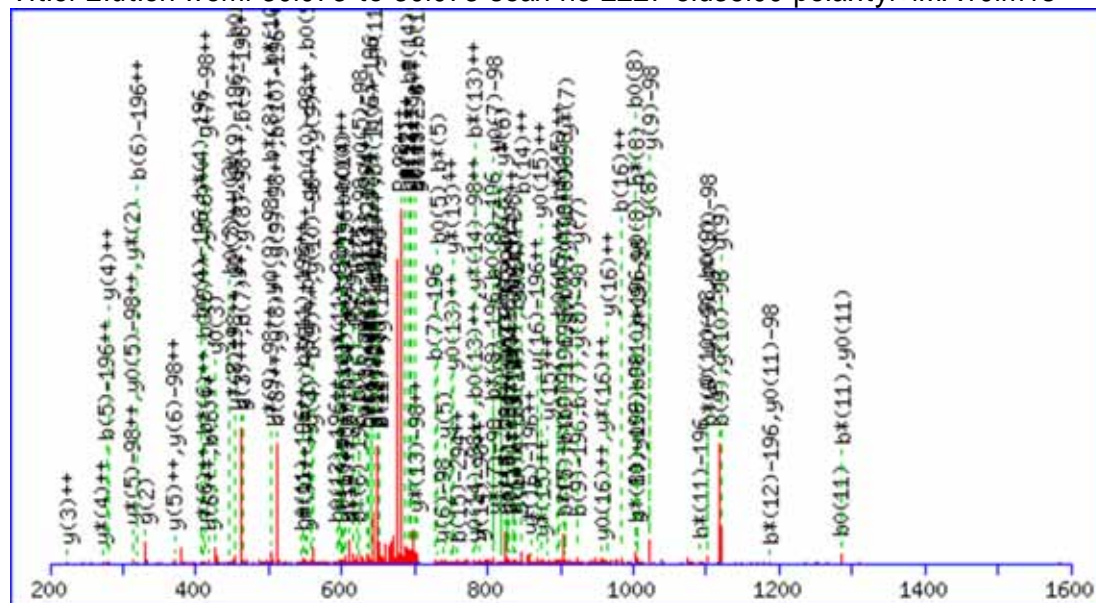

**Monoisotopic mass of neutral peptide Mr(calc): 2138.9303**

**Fixed modifications:** Carbamidomethyl (C) (apply to specified residues or termini only)

**Variable modifications:**

**N-term :** Dimethyl (N-term)

**T1 :** Phospho (ST), with neutral losses 97.9769(shown in table), 0.0000

**S2 :** Phospho (ST), with neutral losses 97.9769(shown in table), 0.0000

**K4 :** Dimethyl (K)

**T13 :** Phospho (ST), with neutral losses 97.9769(shown in table), 0.0000

**K17 :** Dimethyl (K)

**Ions Score:** 39 **Expect:** 0.0069

**Matched b ions:** b(3), b(5)-196++, b(5)-98, b(6)++, b(6)-196++, b(6)-98++, b(6)-196, b(6)-98, b(6), b(7)++, b(7)-98, b(7)-98++, b(7), b(7)-196, b(8)-98++, b(8)++, b(8)-98, b(9)-196++, b(9)-98, b(9), b(9)-98++, b(9)++, b(9)-196, b(10)++, b(10)-98, b(10)-196++, b(10)-98++, b(11)-98++, b(11)++, b(12)-196++, b(12)-98++, b(12)++, b(13)-294++, b(13)-196++, b(14)++, b(14)-294++, b(14)-98++, b(15)-196++, b(15)++, b(15)-98++, b(15)-294++, b(16)++, b(16)-196++, b(16)-294++

**Matched y ions:** y(2), y(3)++, y(3), y(4)++, y(4), y(5)-98, y(5)++, y(5), y(6)++, y(6)-98++, y(6)-98, y(6), y(7)++, y(7)-98, y(7)-98++, y(7), y(8)-98++, y(8), y(8)++, y(8)-98, y(9)-98++, y(9), y(9)++, y(9)-98, y(10)++, y(10)-98, y(10)-98++, y(11)-98++, y(11)++, y(12)-98++, y(12)++, y(14)-98++, y(14)++, y(15)-98++, y(15)++, y(16)-196++, y(16)-98++, y(16)++

**Precursor origin neutral loss:** +

**Peptide No.1190**

**TSSPSSAGSVSLGHYTPTSR**

**Confirmed sites: @S:3**

**Ambiguous sites:**



MS/MS Fragmentation of **TSSPSSAGSVSLGHYPTSR**

Found in **ABLM2\_MOUSE**, Actin-binding LIM protein 2 OS=Mus musculus GN=Ablim2 PE=1 SV=1

Match to Query 6882: 2085.935973 from(696.319267,3+)

Title: Elution from: 36.360 to 36.360 scan no 3119 cid35.00 polarity:+:MA10

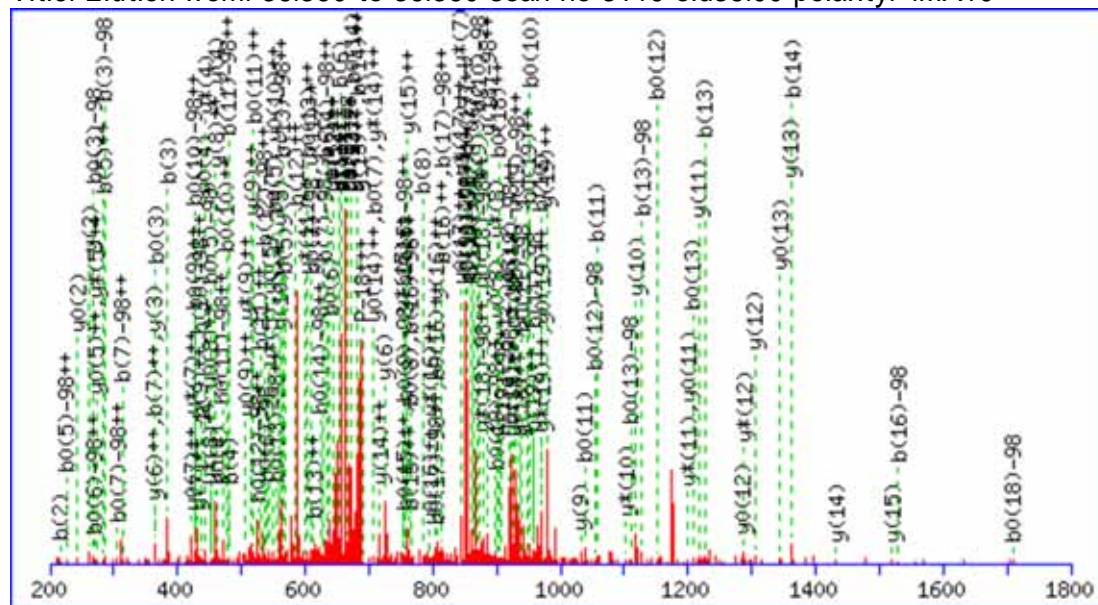

**Monoisotopic mass of neutral peptide Mr(calc):** 2085.9368

**Fixed modifications:** Carbamidomethyl (C) (apply to specified residues or termini only)

**Variable modifications:**

**N-term :** Dimethyl (N-term)

**S3 :** Phospho (ST), with neutral losses 0.0000(shown in table), 97.9769

**Ions Score:** 56 **Expect:** 0.00013

**Matched b ions:** b(2), b(3), b(3)-98, b(4), b(5)++, b(5), b(6), b(7)-98++, b(7)++, b(7)-98, b(8), b(9)++, b(9), b(10)-98++, b(10)-98, b(10), b(11), b(11)-98++, b(11)++, b(11)-98, b(12)-98++, b(12)++, b(13)-98, b(13), b(13)-98++, b(13)++, b(14), b(14)++, b(14)-98++, b(15)++, b(16)-98, b(16)-98++, b(16)++, b(17)-98++, b(17)++, b(19)-98++, b(19)++

**Matched y ions:** y(2), y(3), y(4), y(5), y(6), y(6)++, y(7)++, y(7), y(8)++, y(8), y(9), y(9)++, y(10), y(10)++, y(11), y(11)++, y(12), y(12)++, y(13), y(13)++, y(14), y(14)++, y(15)++, y(15), y(16)++, y(17)++, y(18)-98++, y(18)++, y(19)++, y(19)-98++

**Precursor origin neutral loss:** +

**Peptide No.1191**

**TSSPSSAGSVSLGHYPTSR**

**Confirmed sites:** @S:3

**Ambiguous sites:**

MS/MS Fragmentation of **TSSPSSAGSVSLGHYPTSR**

Found in **ABLM2\_MOUSE**, Actin-binding LIM protein 2 OS=Mus musculus GN=Ablim2 PE=1 SV=1

Match to Query 4969: 2091.969381 from(698.330403,3+)

Title: Elution from: 36.259 to 36.259 scan no 2937 cid35.00 polarity:+:MA10:m1s



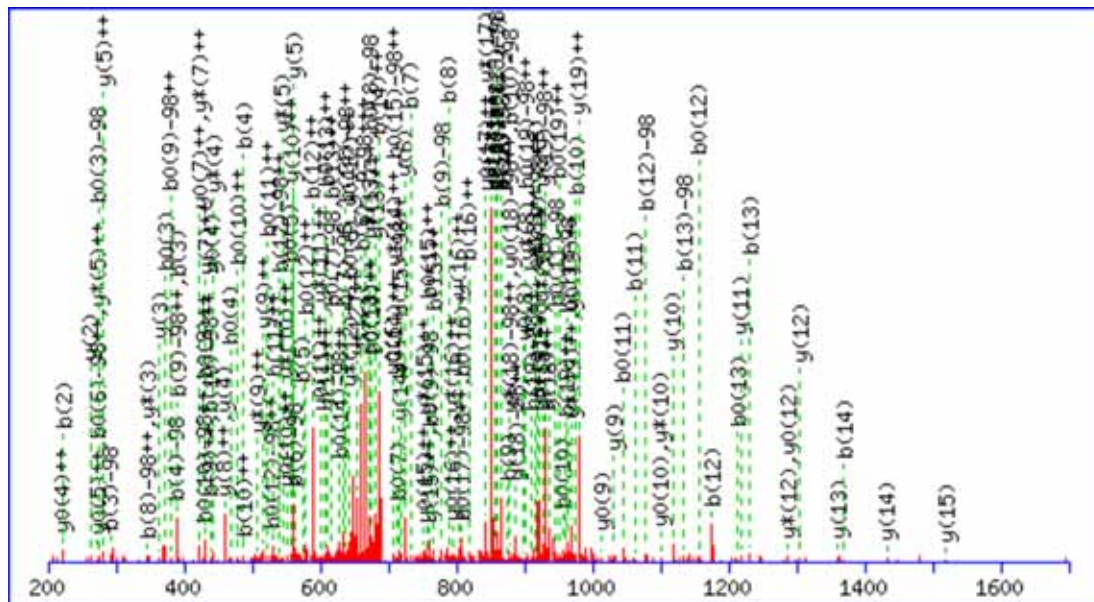

**Monoisotopic mass of neutral peptide Mr(calc):** 2091.9686

**Fixed modifications:** Carbamidomethyl (C) (apply to specified residues or termini only)

**Variable modifications:**

**N-term :** Dimethyl:2H(4)13C(2) (N-term)

**S3 :** Phospho (ST), with neutral losses 97.9769(shown in table), 0.0000

**Ions Score:** 76 **Expect:** 1.8e-006

**Matched b ions:** b(2), b(3), b(3)-98, b(4)-98, b(4), b(5), b(6)-98, b(6), b(7)-98, b(7), b(8)-98, b(8), b(9)-98, b(9)-98, b(9)++, b(9), b(10)++, b(10)-98, b(10)-98, b(10), b(11)++, b(11)-98, b(11), b(12)++, b(12), b(12)-98, b(12)-98, b(12)-98, b(13), b(13)-98, b(13)++, b(14), b(14)-98, b(14)-98, b(14)++, b(15)++, b(15)-98, b(15)-98, b(16)++, b(17)++, b(18)-98, b(18)++, b(19)-98, b(19)++

**Matched y ions:** y(2), y(3), y(4), y(5)++, y(5), y(6), y(7)++, y(7), y(8)++, y(8), y(9), y(9)++, y(10), y(10)++, y(11), y(11)++, y(12), y(12)++, y(13), y(13)++, y(14), y(14)++, y(15), y(15)++, y(16)++, y(17)++, y(18)-98, y(18)++, y(19)-98, y(19)++

**Precursor origin neutral loss:** +

## Peptide No.1192

**TVKAVEDEATK**

**Confirmed sites:** @T:1,@T:10

**Ambiguous sites:**

MS/MS Fragmentation of **TVKAVEDEATK**

Found in **TLN1\_MOUSE**, Talin-1 OS=Mus musculus GN=Tln1 PE=1 SV=1

Match to Query 1532: 1383.617610 from(692.816081,2+)

Title: Elution from: 61.740 to 61.740 scan no 5586 cid35.00 polarity:+:MA10

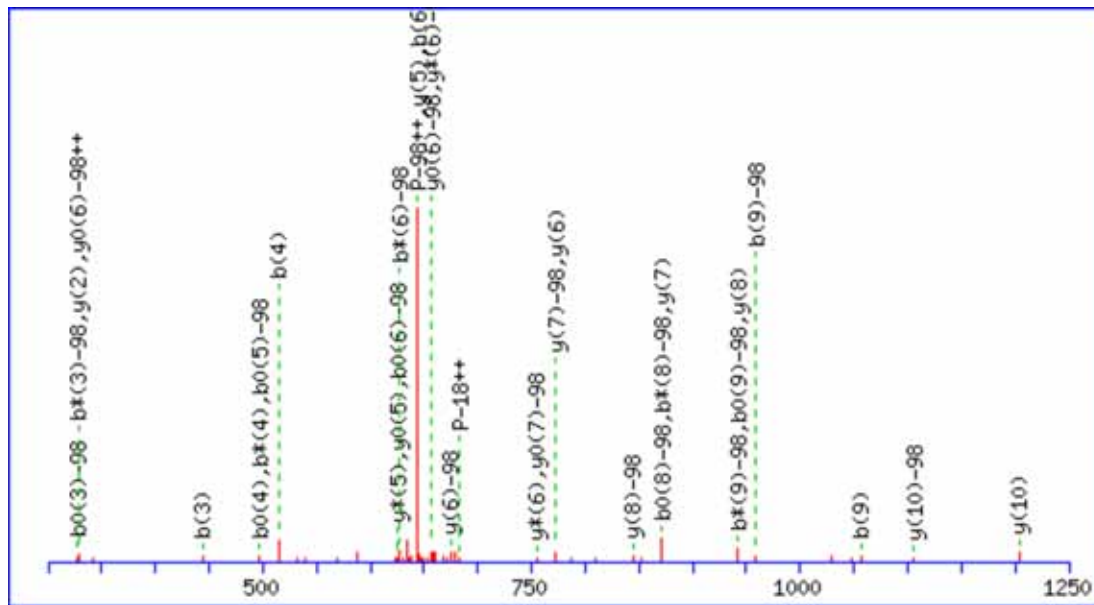

**Monoisotopic mass of neutral peptide Mr(calc):** 1383.6148

**Fixed modifications:** Carbamidomethyl (C) (apply to specified residues or termini only)

**Variable modifications:**

**T1 :** Phospho (ST), with neutral losses 0.0000(shown in table), 97.9769

**K3 :** Dimethyl:2H(4)13C(2) (K)

**T10 :** Phospho (ST), with neutral losses 0.0000(shown in table), 97.9769

**Ions Score:** 46 **Expect:** 0.00068

**Matched b ions:** b(3), b(4), b(6)-98, b(9)-98, b(9)

**Matched y ions:** y(2), y(5), y(6), y(6)-98, y(7)-98, y(7), y(8), y(8)-98, y(10), y(10)-98

**Precursor origin neutral loss:** +

## Peptide No.1193

**VAEPEESEAEPPAAEGR**

**Confirmed sites:** @S:7

**Ambiguous sites:**

MS/MS Fragmentation of **VAEPEESEAEPPAAEGR**

Found in **MXRA7\_MOUSE**, Matrix-remodeling-associated protein 7 OS=Mus musculus GN=Mxra7  
PE=1 SV=2

Match to Query 5107: 1906.785174 from(954.399863,2+)

Title: Elution from: 31.283 to 31.283 scan no 2482 cid35.00 polarity:+:MA10:m1s

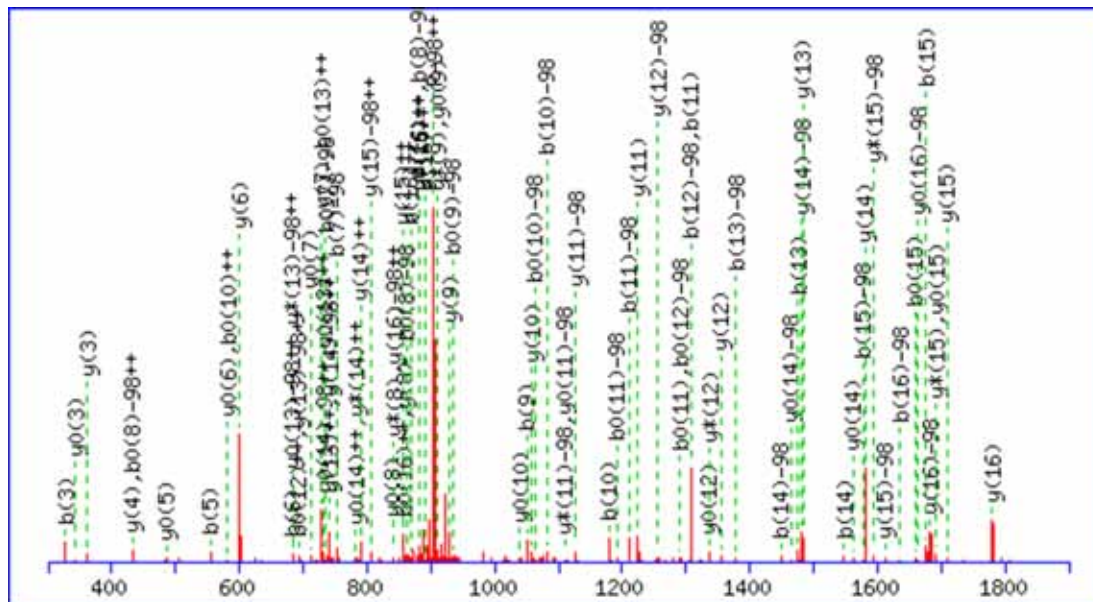

**Monoisotopic mass of neutral peptide Mr(calc):** 1906.7833

**Fixed modifications:** Carbamidomethyl (C) (apply to specified residues or termini only)

**Variable modifications:**

**N-term :** Dimethyl (N-term)

**S7 :** Phospho (ST), with neutral losses 0.0000(shown in table), 97.9769

**Ions Score:** 76 **Expect:** 9e-007

**Matched b ions:** b(3), b(5), b(6), b(7)-98, b(8)-98, b(9), b(10), b(10)-98, b(11), b(11)-98, b(12)-98, b(13), b(13)-98, b(14), b(14)-98, b(15), b(15)-98, b(16)-98, b(16)++

**Matched y ions:** y(3), y(4), y(6), y(7), y(8), y(9), y(10), y(11), y(11)-98, y(12)-98, y(12), y(13)-98++, y(13)++, y(13), y(14)-98, y(14), y(14)-98++, y(14)++, y(15)-98++, y(15)-98, y(15), y(15)++, y(16)-98, y(16), y(16)-98++, y(16)++

**Precursor origin neutral loss:** +

## Peptide No.1194

**VASEEEEEVPLVVYLK**

**Confirmed sites:** @S:3

**Ambiguous sites:**

MS/MS Fragmentation of **VASEEEEEVPLVVYLK**

Found in **SYNPO\_MOUSE**, Synaptopodin OS=Mus musculus GN=Synpo PE=1 SV=2

Match to Query 3660: 1838.933838 from(920.474195,2+)

Title: Elution from: 65.212 to 65.212 scan no 6125 cid35.00 polarity:+MA10

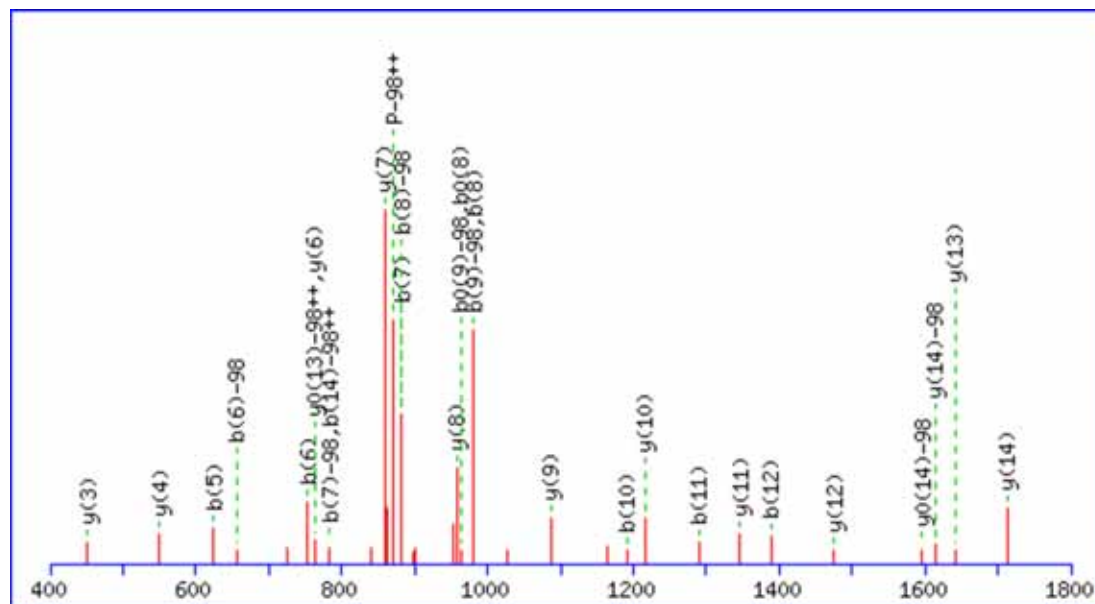

**Monoisotopic mass of neutral peptide Mr(calc):** 1838.9318

**Fixed modifications:** Carbamidomethyl (C) (apply to specified residues or termini only)

**Variable modifications:**

**N-term :** Dimethyl (N-term)

**S3 :** Phospho (ST), with neutral losses 0.0000(shown in table), 97.9769

**K15 :** Dimethyl (K)

**Ions Score:** 95 **Expect:** 1.8e-008

**Matched b ions:** b(5), b(6), b(6)-98, b(7), b(7)-98, b(8), b(8)-98, b(9)-98, b(10), b(11), b(12), b(14)-98++

**Matched y ions:** y(3), y(4), y(6), y(7), y(8), y(9), y(10), y(11), y(12), y(13), y(14)-98, y(14)

**Precursor origin neutral loss:** +

## Peptide No.1195

**VASEEEVPLVVYLK**

**Confirmed sites:** @S:3

**Ambiguous sites:**

MS/MS Fragmentation of **VASEEEVPLVVYLK**

Found in **SYNPO\_MOUSE**, Synaptopodin OS=Mus musculus GN=Synpo PE=1 SV=2

Match to Query 3366: 1850.997470 from(926.506011,2+)

Title: Elution from: 65.329 to 65.329 scan no 6018 cid35.00 polarity:+:MA10



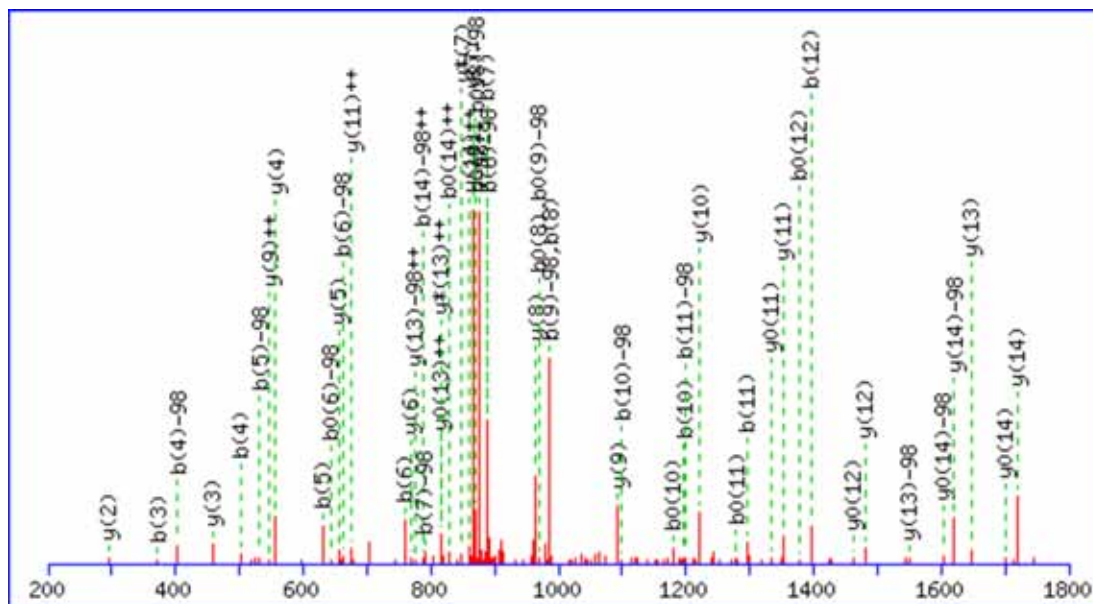

**Monoisotopic mass of neutral peptide Mr(calc):** 1850.9954

**Fixed modifications:** Carbamidomethyl (C) (apply to specified residues or termini only)

**Variable modifications:**

**N-term :** Dimethyl:2H(4)13C(2) (N-term)

**S3 :** Phospho (ST), with neutral losses 97.9769(shown in table), 0.0000

**K15 :** Dimethyl:2H(4)13C(2) (K)

**Ions Score:** 94 **Expect:** 2e-008

**Matched b ions:** b(3), b(4)-98, b(4), b(5), b(5)-98, b(6), b(6)-98, b(7)-98, b(7), b(8), b(8)-98, b(9)-98, b(10), b(10)-98, b(11), b(11)-98, b(12), b(14)-98++

**Matched y ions:** y(2), y(3), y(4), y(5), y(6), y(7), y(8), y(9), y(9)++, y(10), y(11), y(11)++, y(12), y(13)-98, y(13), y(13)-98++, y(14)-98, y(14), y(14)++

**Precursor origin neutral loss:** +

## Peptide No.1196

**VAVVRTPPKSPSASK**

**Confirmed sites:** @T:6,@S:10

**Ambiguous sites:**

MS/MS Fragmentation of **VAVVRTPPKSPSASK**

Found in **TAU\_MOUSE**, Microtubule-associated protein tau OS=Mus musculus GN=Mapt PE=1 SV=3

Match to Query 4121: 1766.910324 from(589.977384,3+)

Title: Elution from: 26.221 to 26.221 scan no 1789 cid35.00 polarity:+:MA10

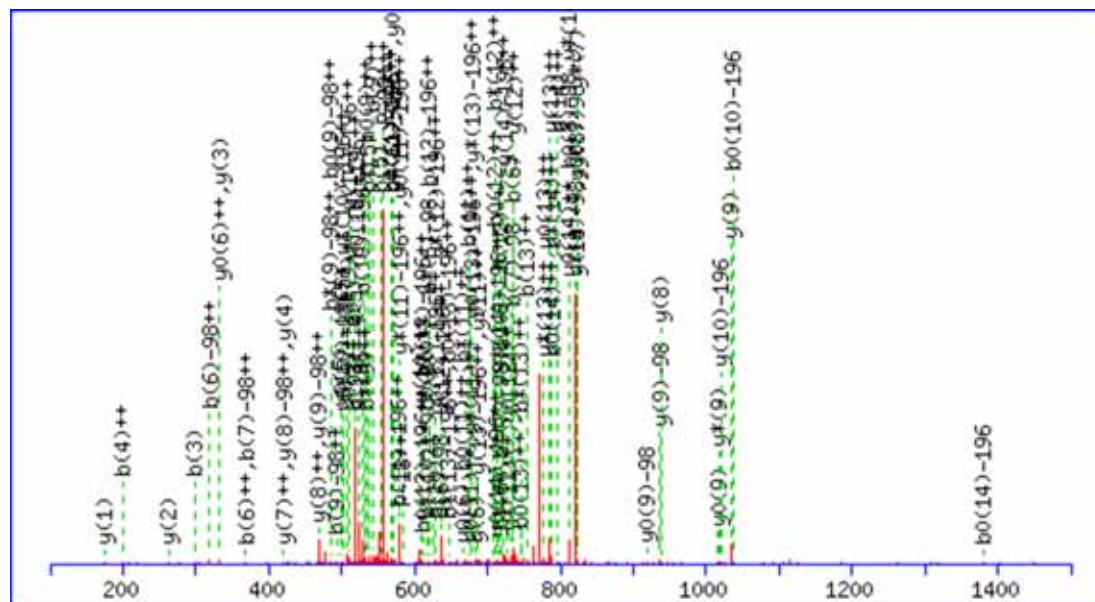

**Monoisotopic mass of neutral peptide Mr(calc):** 1766.9097

**Fixed modifications:** Carbamidomethyl (C) (apply to specified residues or termini only)

**Variable modifications:**

**N-term :** Dimethyl (N-term)

**T6 :** Phospho (ST), with neutral losses 0.0000(shown in table), 97.9769

**K9 :** Dimethyl (K)

**S10 :** Phospho (ST), with neutral losses 0.0000(shown in table), 97.9769

**K15 :** Dimethyl (K)

**Ions Score:** 35 **Expect:** 0.019

**Matched b ions:** b(2), b(3), b(4)++, b(5), b(6)-98++, b(6)++, b(6)-98, b(6), b(7)-98++, b(7)-98, b(9)-98++, b(9)++, b(10)-98++, b(10)-196++, b(10)++, b(11)-196++, b(11)-98++, b(11)++, b(12)-98++, b(12)-196++, b(12)++, b(13)++, b(14)-98++, b(14)++

**Matched y ions:** y(1), y(2), y(3), y(4), y(5), y(6), y(7)++, y(8)++, y(8)-98++, y(8), y(9)-98++, y(9)-98, y(9), y(9)++, y(10)-196, y(10)++, y(10)-196++, y(10)-98++, y(11)-98++, y(11)++, y(12)++, y(12)-196++, y(12)-98++, y(13)++, y(13)-98++, y(13)-196++, y(14)-98++, y(14)++, y(14)-196++

**Precursor origin neutral loss:** +

## Peptide No.1197

**VCTDTRWLSLISLNKNGR**

**Confirmed sites:** @T:5,@S:9,@S:14

**Ambiguous sites:**

MS/MS Fragmentation of **VCTDTRWLSLISLNKNGR**

Found in **FA46C\_MOUSE**, Protein FAM46C OS=Mus musculus GN=Fam46c PE=2 SV=1

Match to Query 6404: 2460.992232 from(616.255334,4+)

Title: Elution from: 26.342 to 26.342 scan no 1633 cid35.00 polarity:+:MA10:m1s

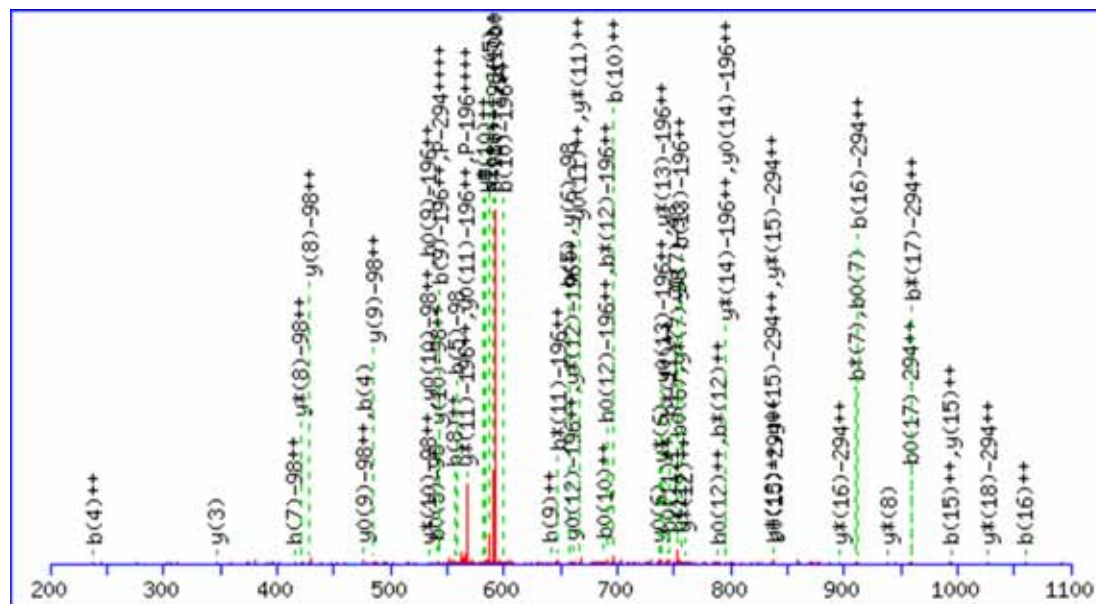

**Monoisotopic mass of neutral peptide Mr(calc):** 2460.9899

**Fixed modifications:** Carbamidomethyl (C) (apply to specified residues or termini only)

**Variable modifications:**

**T5 :** Phospho (ST), with neutral losses 0.0000(shown in table), 97.9769

**S9 :** Phospho (ST), with neutral losses 0.0000(shown in table), 97.9769

**S14 :** Phospho (ST), with neutral losses 0.0000(shown in table), 97.9769

**Ions Score:** 29 **Expect:** 0.044

**Matched b ions:** b(4)++, b(4), b(5)-98, b(5), b(7)-98++, b(8)++, b(9)-98++, b(9)-196++, b(9)++, b(10)++, b(10)-98++, b(10)-196++, b(11)++, b(11)-98++, b(13)-196++, b(15)++, b(15)-196++, b(15)-98++, b(16)++, b(16)-294++

**Matched y ions:** y(3), y(5), y(6)-98, y(8)-98++, y(9)-98++, y(10)++, y(10)-98++, y(13)-98++, y(15)++, y(15)-196++, y(15)-98++

**Precursor origin neutral loss:** +

## Peptide No.1198

**VDGMDILCVREATK**

**Confirmed sites:** @T:13

**Ambiguous sites:**

**MS/MS Fragmentation of VDGMDILCVREATK**

Found in **ODPA\_MOUSE**, Pyruvate dehydrogenase E1 component subunit alpha, somatic form, mitochondrial OS=Mus musculus GN=Pdha1 PE=1 SV=1

Match to Query 4471: 1713.785034 from(857.899793,2+)

Title: Elution from: 61.206 to 61.206 scan no 6136 cid35.00 polarity:+:MA10:m1s

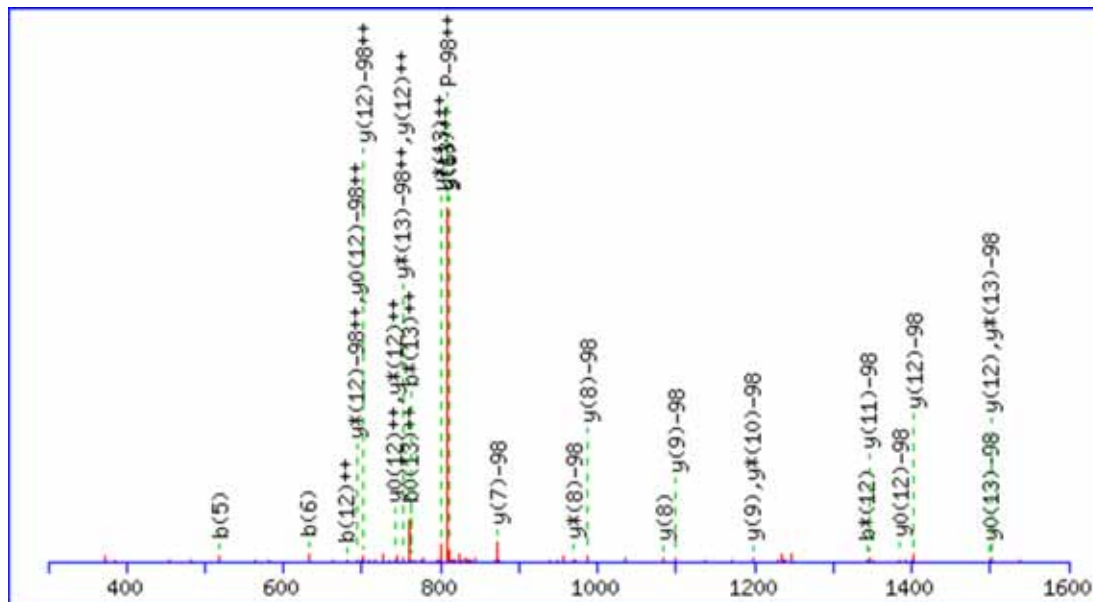

**Monoisotopic mass of neutral peptide Mr(calc): 1713.7831**

**Fixed modifications:** Carbamidomethyl (C) (apply to specified residues or termini only)

**Variable modifications:**

**T13 :** Phospho (ST), with neutral losses 97.9769(shown in table), 0.0000

**K14 :** Dimethyl (K)

**Ions Score:** 32 **Expect:** 0.029

**Matched b ions:** b(5), b(6), b(12)++

**Matched y ions:** y(6), y(7)-98, y(8)-98, y(8), y(9)-98, y(9), y(11)-98, y(12)-98, y(12), y(12)-98++, y(12)++, y(13)++

**Precursor origin neutral loss:** +

## Peptide No.1199

**VDGSNLEGGSQQGPSTPPNTPDPR**

**Confirmed sites:** @S:10,@T:16

**Ambiguous sites:**

**MS/MS Fragmentation of VDGSNLEGGSQQGPSTPPNTPDPR**

Found in **MYOZ2\_MOUSE**, Myozenin-2 OS=Mus musculus GN=Myoz2 PE=1 SV=1

Match to Query 6318: 2594.068850 from(1298.041701,2+)

Title: Elution from: 37.317 to 37.317 scan no 2999 cid35.00 polarity:+:MA10:m1s



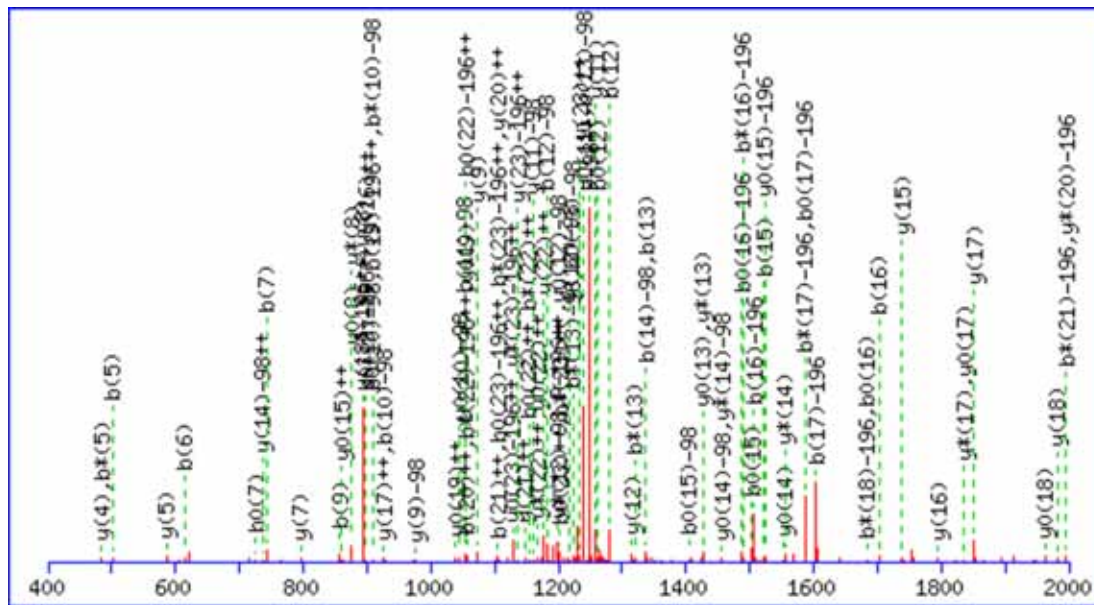

**Monoisotopic mass of neutral peptide Mr(calc):** 2594.0687

**Fixed modifications:** Carbamidomethyl (C) (apply to specified residues or termini only)

**Variable modifications:**

**N-term :** Dimethyl (N-term)

**S10 :** Phospho (ST), with neutral losses 97.9769(shown in table), 0.0000

**T16 :** Phospho (ST), with neutral losses 97.9769(shown in table), 0.0000

**Ions Score:** 68 **Expect:** 8.5e-006

**Matched b ions:** b(5), b(6), b(7), b(9), b(10)-98, b(11)-98, b(12)-98, b(12), b(13), b(13)-98, b(14)-98, b(15), b(16)-196, b(16)-98, b(16), b(17)-196, b(17)-98, b(19)-98, b(19)-196++, b(20)++, b(21)-98++, b(21)++

**Matched y ions:** y(4), y(5), y(7), y(8), y(9), y(9)-98, y(11), y(11)-98, y(12), y(12)-98, y(14)-98++, y(15), y(15)-98, y(16), y(16)++, y(17)-98, y(17), y(17)++, y(18)-196++, y(18), y(19)-98, y(20)-98++, y(20)++, y(21)++, y(22)++, y(22)-98++, y(23)-196++, y(23)-98++, y(23)++

**Precursor origin neutral loss:** +

## Peptide No.1200

**VDGSNLEGGSSQQGPSTPPNTPDPR**

**Confirmed sites:** @S:10,@T:20

**Ambiguous sites:**

MS/MS Fragmentation of **VDGSNLEGGSSQQGPSTPPNTPDPR**

Found in **MYOZ2\_MOUSE**, Myozenin-2 OS=Mus musculus GN=Myoz2 PE=1 SV=1

Match to Query 7860: 2594.070148 from(649.524813,4+)

Title: Elution from: 37.550 to 37.550 scan no 3338 cid35.00 polarity:+:MA10:m1s

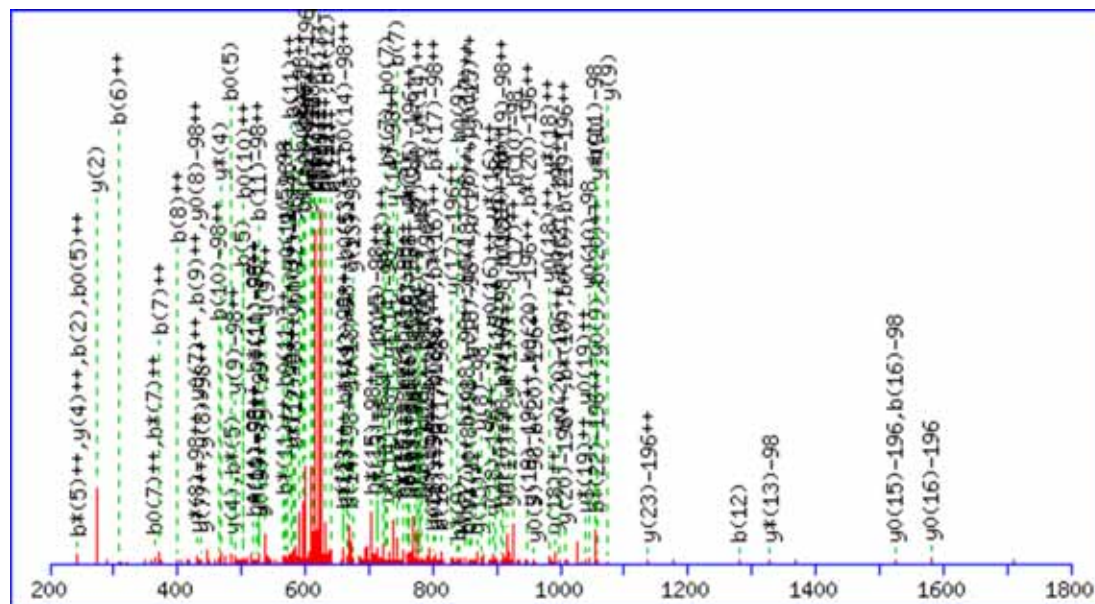

**Monoisotopic mass of neutral peptide Mr(calc):** 2594.0687

**Fixed modifications:** Carbamidomethyl (C) (apply to specified residues or termini only)

**Variable modifications:**

**N-term :** Dimethyl (N-term)

**S10 :** Phospho (ST), with neutral losses 97.9769(shown in table), 0.0000

**T20 :** Phospho (ST), with neutral losses 97.9769(shown in table), 0.0000

**Ions Score:** 37 **Expect:** 0.011

**Matched b ions:** b(2), b(5), b(6)++, b(6), b(7)++, b(7), b(8)++, b(8), b(9)++, b(9), b(10)-98, b(10)-98++, b(11)-98, b(11)-98++, b(11)++, b(12), b(12)-98++, b(12)++, b(13)-98++, b(13)++, b(14)-98++, b(15)-98++, b(15)++, b(16)-98, b(16)++, b(16)-98++, b(17)-98++, b(17)++, b(18)++, b(18)-98++, b(20)++, b(20)-98++, b(20)-196++, b(21)-98++, b(21)-196++

**Matched y ions:** y(2), y(4)++, y(4), y(5)-98, y(5), y(6), y(7)++, y(7)-98, y(8)-98++, y(8)-98, y(9)++, y(9), y(9)-98++, y(10)++, y(11)++, y(11)-98++, y(12)++, y(12)-98++, y(13)++, y(13)-98++, y(14)-98++, y(15)++, y(15)-196++, y(16)++, y(16)-196++, y(16)-98++, y(17)++, y(17)-98++, y(17)-196++, y(18)++, y(18)-196++, y(19)-196++, y(20)-98++, y(20)-196++, y(23)-196++

**Precursor origin neutral loss:** +

## Peptide No.1201

**VDGSNLEGGSQQGPSTPPNTPDPR**

**Confirmed sites:** @S:15

**Ambiguous sites:**

MS/MS Fragmentation of **VDGSNLEGGSQQGPSTPPNTPDPR**

Found in **MYOZ2\_MOUSE**, Myozenin-2 OS=Mus musculus GN=Myoz2 PE=1 SV=1

Match to Query 6385: 2514.104236 from(629.533335,4+)

Title: Elution from: 35.219 to 35.219 scan no 2803 cid35.00 polarity:+:MA10:m1s

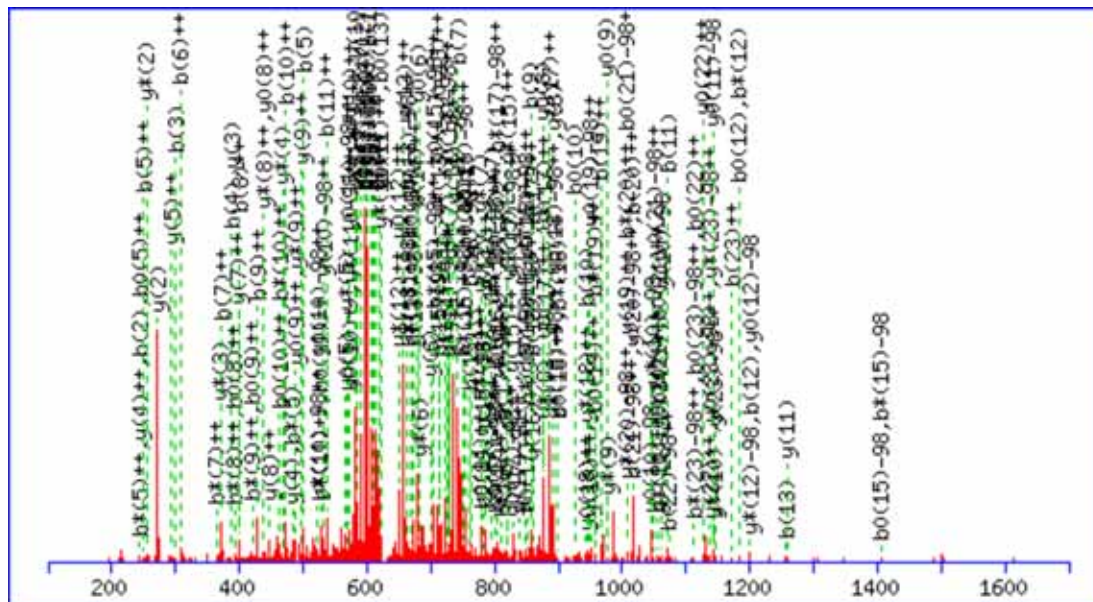

**Monoisotopic mass of neutral peptide Mr(calc):** 2514.1024

**Fixed modifications:** Carbamidomethyl (C) (apply to specified residues or termini only)

**Variable modifications:**

**N-term :** Dimethyl (N-term)

**S15 :** Phospho (ST), with neutral losses 0.0000(shown in table), 97.9769

**Ions Score:** 54 **Expect:** 0.00029

**Matched b ions:** b(2), b(3), b(4), b(5), b(5)++, b(6)++, b(6), b(7)++, b(7), b(8)++, b(8), b(9)++, b(9), b(10)++, b(10), b(11), b(11)++, b(12), b(12)++, b(13), b(14)++, b(15)-98++, b(15)++, b(16)-98++, b(16)++, b(17)-98++, b(17)++, b(18)-98++, b(19)++, b(20)++, b(21)-98++, b(22)-98++, b(23)++  
**Matched y ions:** y(2), y(3), y(4)++, y(4), y(5), y(5)++, y(6), y(7)++, y(7), y(8), y(8)++, y(9)++, y(10)++, y(10)-98++, y(10)-98, y(11)-98++, y(11), y(12)++, y(12)-98++, y(13)++, y(13)-98++, y(14)-98++, y(14)++, y(15)++, y(15)-98++, y(16)++, y(17)++, y(17)-98++, y(18)++, y(19)++, y(20)-98++, y(22)++, y(23)-98++  
**Precursor origin neutral loss:** +

## Peptide No.1202

**VDGSNLEGGSSQQGPSTPPNTPDPR**

**Confirmed sites:** @S:15,@T:16

**Ambiguous sites:**

**MS/MS Fragmentation of VDGSNLEGGSSQQGPSTPPNTPDPR**

Found in **MYOZ2\_MOUSE**, Myozenin-2 OS=Mus musculus GN=Myoz2 PE=1 SV=1

Match to Query 7863: 2594.070321 from(865.697383,3+)

Title: Elution from: 37.985 to 37.985 scan no 3397 cid35.00 polarity:+:MA10:m1s



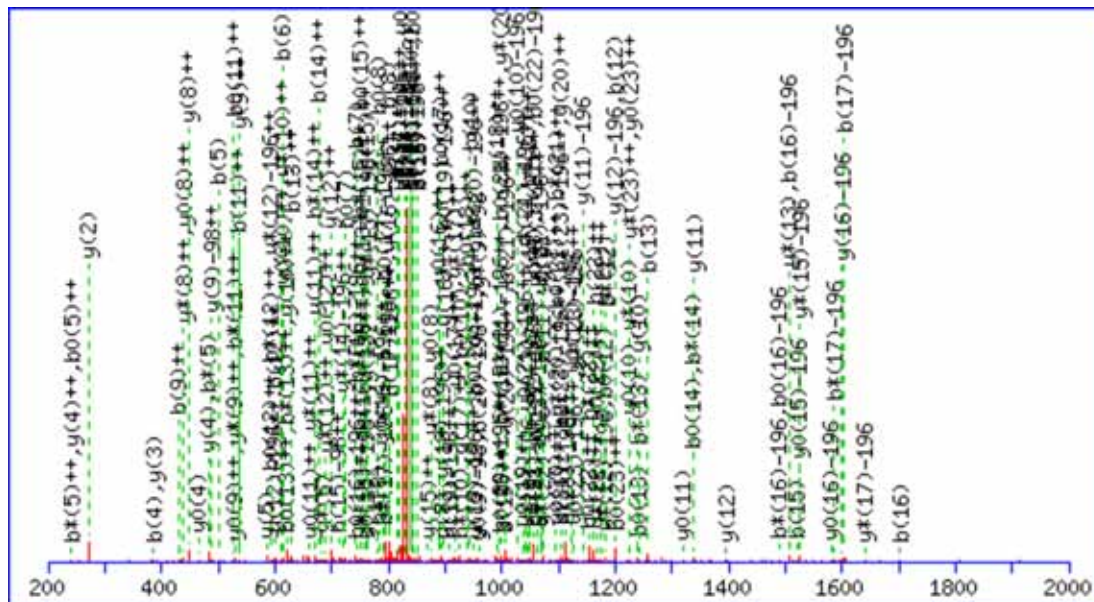

**Monoisotopic mass of neutral peptide Mr(calc):** 2594.0687

**Fixed modifications:** Carbamidomethyl (C) (apply to specified residues or termini only)

**Variable modifications:**

**N-term :** Dimethyl (N-term)

**S15 :** Phospho (ST), with neutral losses 0.0000(shown in table), 97.9769

**T16 :** Phospho (ST), with neutral losses 0.0000(shown in table), 97.9769

**Ions Score:** 42 **Expect:** 0.0032

**Matched b ions:** b(4), b(5), b(6), b(7), b(8), b(9)++, b(10), b(11), b(11)++, b(12), b(12)++, b(13), b(13)++, b(14)++, b(15), b(15)-98++, b(15)++, b(16)-98, b(16)-196, b(16), b(16)-196++, b(16)-98++, b(16)++, b(17)-196, b(17)-98, b(17)-196++, b(17)-98++, b(18)-196++, b(19)-98, b(19)-98++, b(19)++, b(19)-196++, b(20)-98++, b(20)++, b(20)-196++, b(21)-196++, b(21)-98++, b(21)++, b(22)-98++, b(22)++, b(22)-196++, b(23)-196++, b(23)-98++

**Matched y ions:** y(2), y(3), y(4), y(4)++, y(5), y(8)++, y(8), y(9), y(9)-98++, y(9)++, y(10)++, y(10)-196, y(10), y(11)-98++, y(11)++, y(11), y(11)-98, y(11)-196, y(12)++, y(12)-196, y(12), y(12)-98++, y(12)-196++, y(12)-98, y(13)-98++, y(13)++, y(14)-98++, y(15)-98++, y(15)++, y(15)-98, y(16)-196++, y(16)-98++, y(16)-196, y(16)++, y(17)++, y(17)-98++, y(17)-196++, y(18)-196++, y(18)++, y(18)-98++, y(19)-98++, y(19)++, y(19)-196++, y(20)-196++, y(20)-98++, y(20)++, y(22)-98++, y(22)++

**Precursor origin neutral loss:** +

## Peptide No.1203

**VDGSNLEGGSSQQGPSTPPNTPDPR**

**Confirmed sites:** @S:15,@T:20

**Ambiguous sites:**

**MS/MS Fragmentation of VDGSNLEGGSSQQGPSTPPNTPDPR**

Found in **MYOZ2\_MOUSE**, Myozenin-2 OS=Mus musculus GN=Myoz2 PE=1 SV=1

Match to Query 7861: 2594.070219 from(865.697349,3+)

Title: Elution from: 36.468 to 36.468 scan no 3189 cid35.00 polarity:+:MA10:m1s



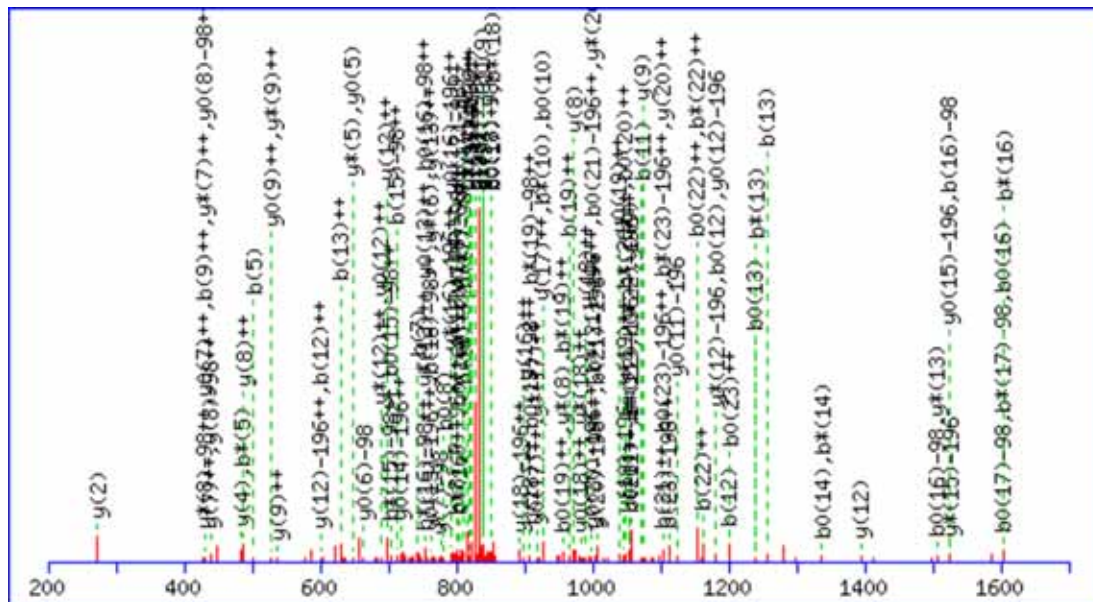

**Monoisotopic mass of neutral peptide Mr(calc):** 2594.0687

**Fixed modifications:** Carbamidomethyl (C) (apply to specified residues or termini only)

**Variable modifications:**

**N-term :** Dimethyl (N-term)

**S15 :** Phospho (ST), with neutral losses 0.0000(shown in table), 97.9769

**T20 :** Phospho (ST), with neutral losses 0.0000(shown in table), 97.9769

**Ions Score:** 52 **Expect:** 0.00036

**Matched b ions:** b(5), b(7), b(8), b(9)++, b(11), b(12), b(12)++, b(13)++, b(13), b(15)-98++, b(16)-98, b(16)-98++, b(16)++, b(17)-98++, b(18)++, b(19)++, b(20)++, b(20)-98++, b(21)-98++, b(21)-196++, b(21)++, b(22)++, b(22)-98++, b(23)-98++, b(23)-196++

**Matched y ions:** y(2), y(4), y(7)++, y(7)-98, y(8)++, y(8)-98++, y(8), y(9)++, y(9), y(10)-196, y(11)-98, y(12)++, y(12), y(12)-98, y(12)-196++, y(13)-98++, y(13)++, y(14)++, y(14)-98++, y(15)-98++, y(16)-196++, y(16)-98++, y(16)++, y(17)++, y(17)-196++, y(18)-196++, y(18)++, y(19)++, y(19)-98++, y(20)-98++, y(20)-196++, y(20)++

**Precursor origin neutral loss:** +

## Peptide No.1204

**VDGSNLEGGSQQGPSTPPNTPDPR**

**Confirmed sites:** @T:16

**Ambiguous sites:**

**MS/MS Fragmentation of VDGSNLEGGSQQGPSTPPNTPDPR**

Found in **MYOZ2\_MOUSE**, Myozenin-2 OS=Mus musculus GN=Myoz2 PE=1 SV=1

Match to Query 6622: 2514.103842 from(1258.059197,2+)

Title: Elution from: 35.121 to 35.121 scan no 2803 cid35.00 polarity:+:MA10:m1s

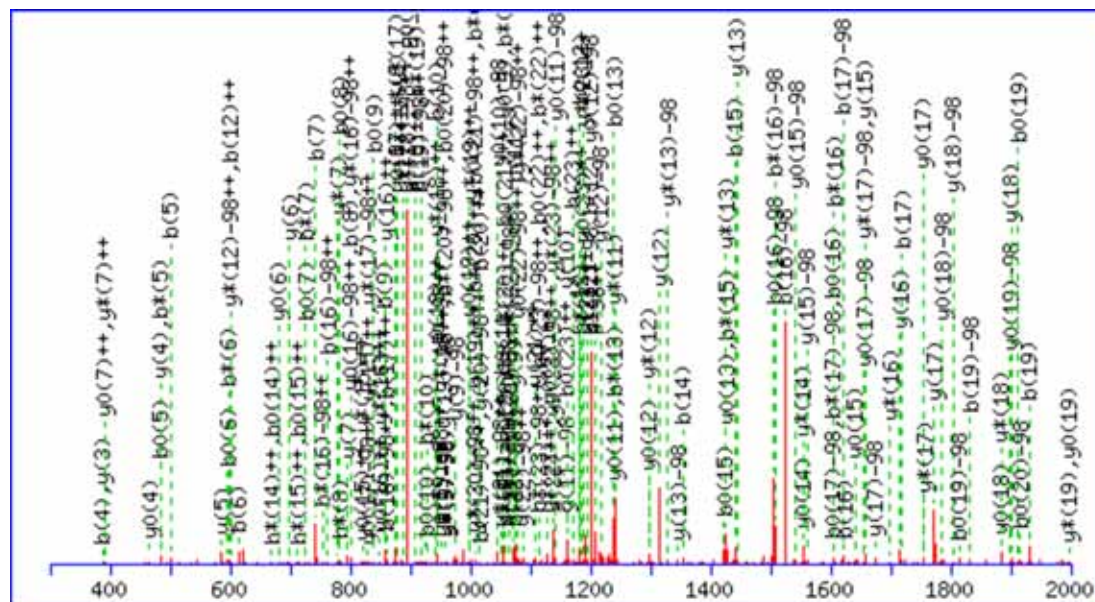

**Monoisotopic mass of neutral peptide Mr(calc):** 2514.1024

**Fixed modifications:** Carbamidomethyl (C) (apply to specified residues or termini only)

**Variable modifications:**

**N-term :** Dimethyl (N-term)

**T16 :** Phospho (ST), with neutral losses 97.9769(shown in table), 0.0000

**Ions Score:** 83 **Expect:** 3.6e-007

**Matched b ions:** b(4), b(5), b(6), b(7), b(8), b(9), b(10), b(11), b(12), b(12)++, b(14), b(15), b(16)-98, b(16), b(16)-98++, b(17)++, b(17)-98, b(17), b(18)-98++, b(18)++, b(19), b(19)-98, b(19)-98++, b(20)++, b(21)-98++, b(21)++, b(22)-98++, b(23)++

**Matched y ions:** y(3), y(4), y(5), y(6), y(7), y(8), y(9), y(9)-98, y(10), y(11)-98, y(12), y(12)-98, y(13)-98, y(13), y(15), y(15)++, y(15)-98, y(16), y(16)++, y(17), y(17)-98, y(17)++, y(18), y(18)-98, y(19)-98++, y(19)++, y(20)-98++, y(20)++, y(21)++, y(22)++, y(22)-98++, y(23)++

**Precursor origin neutral loss:**

## Peptide No.1205

**VDGSNLEGGSSQQGPSTPPNTPDPR**

**Confirmed sites:** @T:16,@T:20

**Ambiguous sites:**

**MS/MS Fragmentation of VDGSNLEGGSSQQGPSTPPNTPDPR**

Found in **MYOZ2\_MOUSE**, Myozenin-2 OS=Mus musculus GN=Myoz2 PE=1 SV=1

Match to Query 7859: 2594.069940 from(1298.042246,2+)

Title: Elution from: 35.116 to 35.116 scan no 3005 cid35.00 polarity:+:MA10:m1s









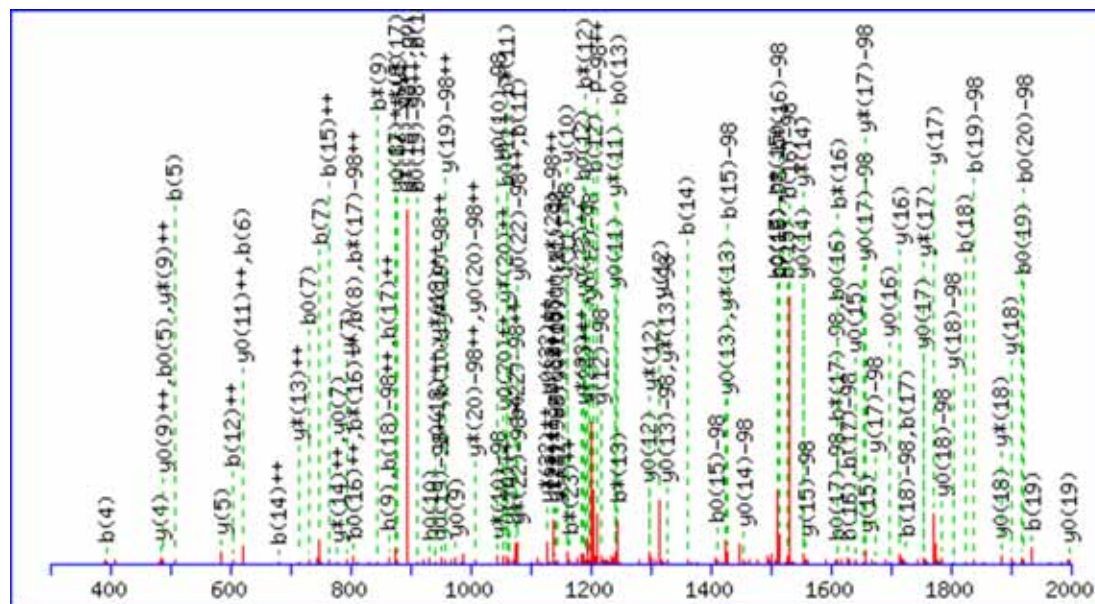

**Monoisotopic mass of neutral peptide Mr(calc):** 2520.1342

**Fixed modifications:** Carbamidomethyl (C) (apply to specified residues or termini only)

**Variable modifications:**

**N-term :** Dimethyl:2H(4)13C(2) (N-term)

**S15 :** Phospho (ST), with neutral losses 0.0000(shown in table), 97.9769

**Ions Score:** 70 **Expect:** 8.3e-006

**Matched b ions:** b(4), b(5), b(6), b(7), b(8), b(9), b(10), b(11), b(12), b(12)++, b(14)++, b(14), b(15)++, b(15)-98, b(16)-98, b(16), b(17)-98, b(17)++, b(17), b(18)-98++, b(18), b(18)++, b(18)-98, b(19), b(19)-98, b(22)-98++

**Matched y ions:** y(4), y(5), y(7), y(8), y(10), y(11)-98, y(12), y(12)-98, y(15), y(15)-98, y(16), y(17), y(17)-98, y(18), y(18)-98, y(19)-98++, y(20)++, y(22)++, y(23)++, y(23)-98++

**Precursor origin neutral loss:** +

## Peptide No.1208

**VDGSNLEGGSQGPSTPPNTPDPR**

**Confirmed sites:** @T:16

**Ambiguous sites:**

**MS/MS Fragmentation of VDGSNLEGGSQGPSTPPNTPDPR**

Found in **MYOZ2\_MOUSE**, Myozenin-2 OS=Mus musculus GN=Myoz2 PE=1 SV=1

Match to Query 6649: 2520.133988 from(1261.074270,2+)

Title: Elution from: 35.334 to 35.334 scan no 2834 cid35.00 polarity:+MA10:m1s

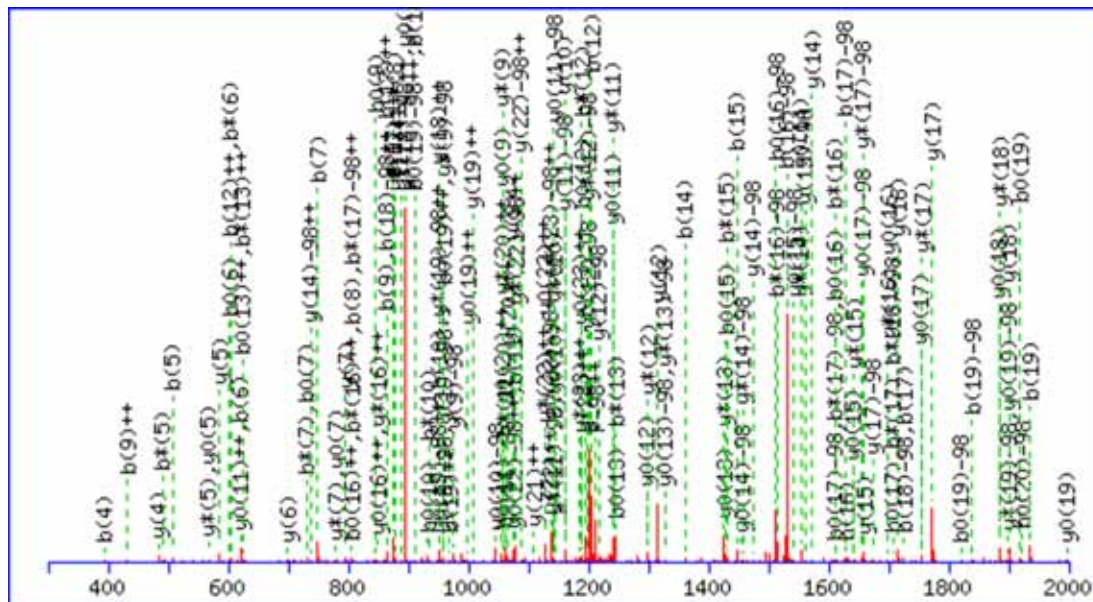

**Monoisotopic mass of neutral peptide Mr(calc): 2520.1342**

**Fixed modifications:** Carbamidomethyl (C) (apply to specified residues or termini only)

**Variable modifications:**

**N-term :** Dimethyl:2H(4)13C(2) (N-term)

**T16 :** Phospho (ST), with neutral losses 97.9769(shown in table), 0.0000

**Ions Score:** 89 **Expect:** 9.9e-008

**Matched b ions:** b(4), b(5), b(6), b(7), b(8), b(9), b(9)++, b(10), b(11), b(12), b(12)++, b(14), b(15), b(16)-98, b(16), b(17)++, b(17)-98, b(17), b(18)-98++, b(18)-98, b(18)++, b(19), b(19)-98, b(19)++

**Matched y ions:** y(4), y(5), y(6), y(7), y(8), y(9), y(9)-98, y(10), y(11)-98, y(12), y(12)-98, y(14)-98++, y(14)-98, y(14), y(15), y(15)-98, y(16), y(17), y(17)-98, y(17)++, y(18), y(18)++, y(19)-98++, y(19)++, y(20)++, y(21)++, y(22)++, y(22)-98++, y(23)++

**Precursor origin neutral loss:** +

## Peptide No.1209

**VDGSNLEGGSQGPSTPPNTPDPR**

**Confirmed sites:** @T:16,@T:20

**Ambiguous sites:**

MS/MS Fragmentation of **VDGSNLEGGSQGPSTPPNTPDPR**

Found in **MYOZ2\_MOUSE**, Myozenin-2 OS=Mus musculus GN=Myoz2 PE=1 SV=1

Match to Query 8362: 2600.098546 from(1301.056549,2+)

Title: Elution from: 34.910 to 34.910 scan no 2911 cid35.00 polarity:+MA10:m1s





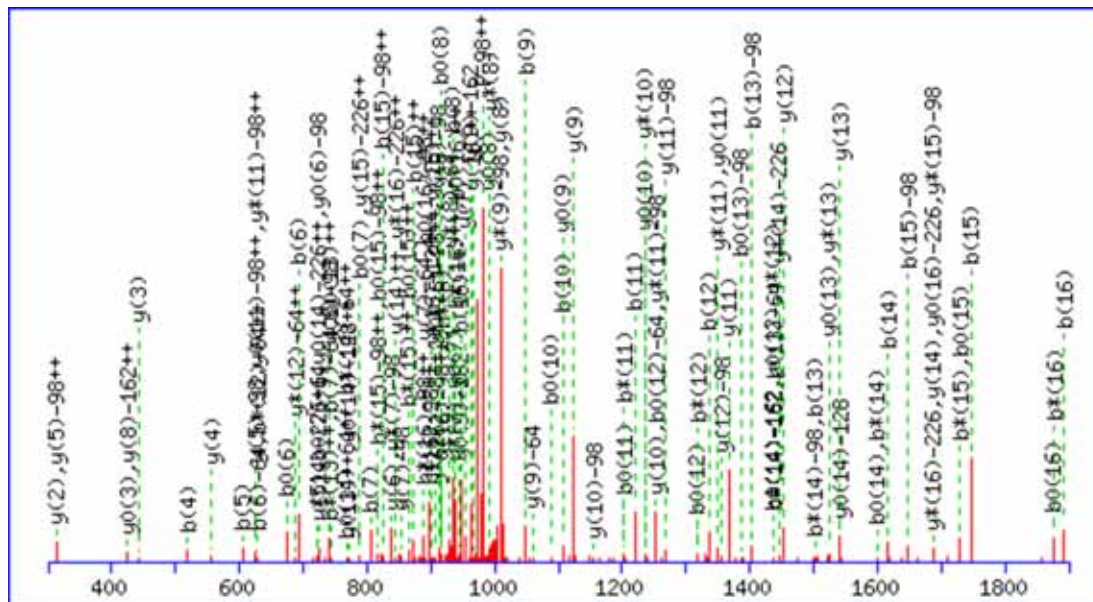

**Monoisotopic mass of neutral peptide Mr(calc):** 2057.6867

**Fixed modifications:** Carbamidomethyl (C) (apply to specified residues or termini only)

**Variable modifications:**

**N-term :** Dimethyl (N-term)

**M4 :** Oxidation (M), with neutral losses 0.0000(shown in table), 63.9983

**S13 :** Phospho (ST), with neutral losses 0.0000(shown in table), 97.9769

**M17 :** Oxidation (M), with neutral losses 0.0000(shown in table), 63.9983

**Ions Score:** 95 **Expect:** 2.9e-009

**Matched b ions:** b(4), b(5), b(6), b(7), b(8), b(9), b(10), b(11), b(12), b(13)-98, b(13), b(14), b(15), b(15)-98, b(15)++, b(15)-98++, b(16)-98++, b(16), b(16)++

**Matched y ions:** y(2), y(3), y(4), y(5)-98++, y(5)-98, y(5), y(6)-98, y(6), y(7)-98, y(7), y(8), y(8)-98, y(9), y(10), y(10)-98, y(11), y(11)-98, y(12), y(12)-98, y(13), y(13)++, y(14), y(14)++, y(15)++, y(16)-98++, y(16)++

**Precursor origin neutral loss:** +

## Peptide No.1211

**VENMSSNQDGNDSDEFM**

**Confirmed sites: @S:13**

**Ambiguous sites:**

MS/MS Fragmentation of **VENMSSNQDGNDSDEFM**

Found in **CCD25\_MOUSE**, Coiled-coil domain-containing protein 25 OS=Mus musculus GN=Ccdc25 PE=1 SV=1

Match to Query 5310: 2063.721260 from(1032.867906,2+)

Title: Elution from: 31.444 to 31.444 scan no 2304 cid35.00 polarity:+:MA10:m1s



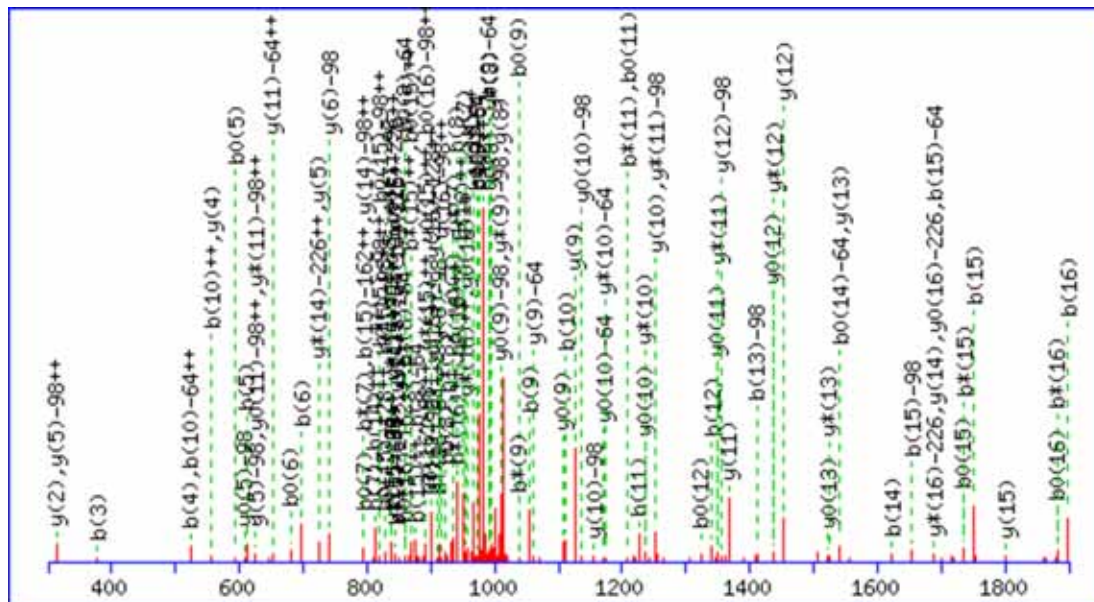

**Monoisotopic mass of neutral peptide Mr(calc):** 2063.7186

**Fixed modifications:** Carbamidomethyl (C) (apply to specified residues or termini only)

**Variable modifications:**

**N-term :** Dimethyl:2H(4)13C(2) (N-term)

**M4 :** Oxidation (M), with neutral losses 0.0000(shown in table), 63.9983

**S13 :** Phospho (ST), with neutral losses 0.0000(shown in table), 97.9769

**M17 :** Oxidation (M), with neutral losses 0.0000(shown in table), 63.9983

**Ions Score:** 98 **Expect:** 1.8e-009

**Matched b ions:** b(3), b(4), b(5), b(6), b(7), b(8), b(9), b(10)++, b(10), b(11), b(12), b(13)-98, b(14)++, b(14), b(15)-98, b(15), b(15)++, b(15)-98, b(16)-98, b(16), b(16)++

**Matched y ions:** y(2), y(4), y(5)-98, y(5)-98, y(5), y(6)-98, y(6), y(7), y(8)-98, y(8), y(9), y(10), y(10)-98, y(11), y(12), y(12)-98, y(13), y(14), y(14)-98, y(14)++, y(15)++, y(15), y(16)++, y(16)-98

**Precursor origin neutral loss:** +

## Peptide No.1212

**VGEIAPGFAYSEYEK**

**Confirmed sites:** @S:11

**Ambiguous sites:**

**MS/MS Fragmentation of VGEIAPGFAYSEYEK**

Found in **TITIN\_MOUSE**, Titin OS=Mus musculus GN=Ttn PE=1 SV=1

Match to Query 4275: 1794.812356 from(898.413454,2+)

Title: Elution from: 53.516 to 53.516 scan no 5299 cid35.00 polarity:+:MA10:m1s

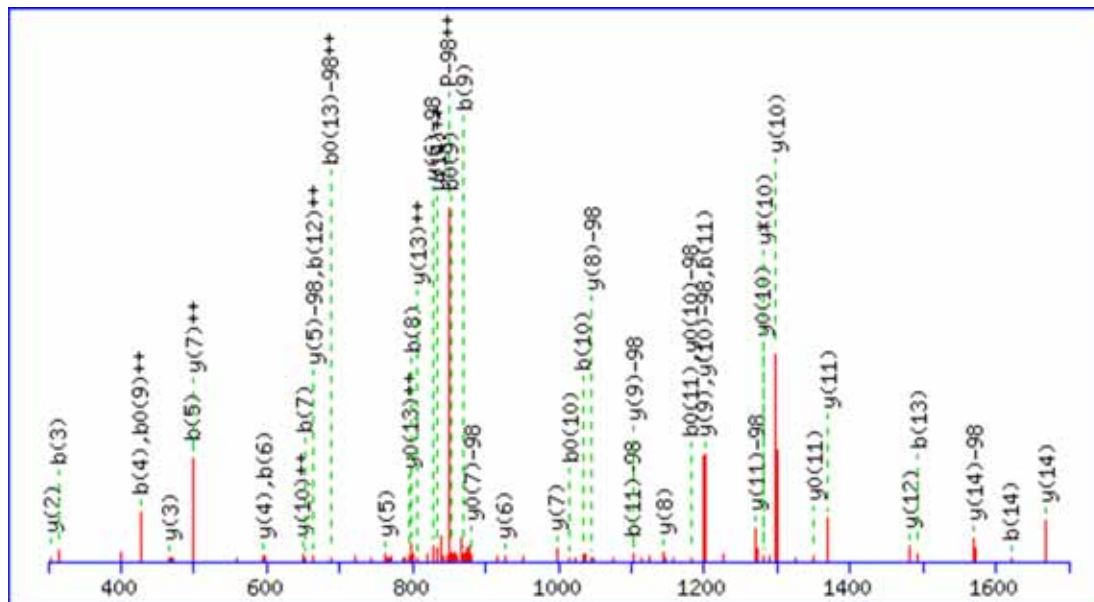

**Monoisotopic mass of neutral peptide Mr(calc):** 1794.8117

**Fixed modifications:** Carbamidomethyl (C) (apply to specified residues or termini only)

**Variable modifications:**

**N-term :** Dimethyl (N-term)

**S11 :** Phospho (ST), with neutral losses 0.0000(shown in table), 97.9769

**K15 :** Dimethyl (K)

**Ions Score:** 61 **Expect:** 4.1e-005

**Matched b ions:** b(3), b(4), b(5), b(6), b(7), b(8), b(9), b(10), b(11)-98, b(11), b(12)++, b(13), b(14)

**Matched y ions:** y(2), y(3), y(4), y(5)-98, y(5), y(6), y(6)-98, y(7), y(7)++, y(8), y(8)-98, y(9), y(9)-98, y(10)++, y(10)-98, y(10), y(11), y(11)-98, y(12), y(13)++, y(14)-98, y(14), y(14)++

**Precursor origin neutral loss:** +

## Peptide No.1213

**VGGSPQPAVSWK**

**Confirmed sites:** @S:4

**Ambiguous sites:**

MS/MS Fragmentation of **VGGSPQPAVSWK**

Found in **OBSCN\_MOUSE**, Obscurin OS=Mus musculus GN=Obscn PE=2 SV=2

Match to Query 2183: 1434.691842 from(718.353197,2+)

Title: Elution from: 38.021 to 38.021 scan no 3402 cid35.00 polarity:+:MA10

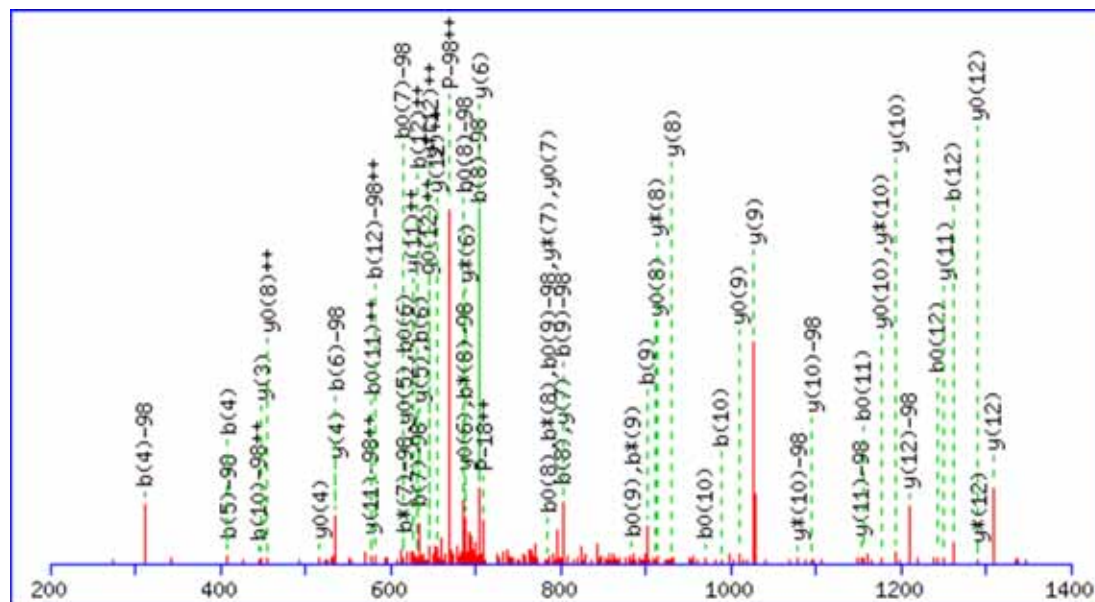

**Monoisotopic mass of neutral peptide Mr(calc):** 1434.6908

**Fixed modifications:** Carbamidomethyl (C) (apply to specified residues or termini only)

**Variable modifications:**

**N-term :** Dimethyl (N-term)

**S4 :** Phospho (ST), with neutral losses 97.9769(shown in table), 0.0000

**K13 :** Dimethyl (K)

**Ions Score:** 40 **Expect:** 0.0037

**Matched b ions:** b(4)-98, b(4), b(5)-98, b(6)-98, b(6), b(7)-98, b(8)-98, b(8), b(9), b(9)-98, b(10)-98++, b(10), b(12), b(12)-98++, b(12)++

**Matched y ions:** y(3), y(4), y(5), y(6), y(7), y(8), y(9), y(10), y(10)-98, y(11)-98, y(11), y(11)-98++, y(11)++, y(12)-98, y(12), y(12)++

**Precursor origin neutral loss:** +

## Peptide No.1214

**VGSLDNVGHLPAGGAVK**

**Confirmed sites:** @S:3

**Ambiguous sites:**

MS/MS Fragmentation of **VGSLDNVGHLPAGGAVK**

Found in **MAP4\_MOUSE**, Microtubule-associated protein 4 OS=Mus musculus GN=Map4 PE=1 SV=3

Match to Query 4556: 1725.883416 from(576.301748,3+)

Title: Elution from: 40.232 to 40.232 scan no 3671 cid35.00 polarity:+MA10

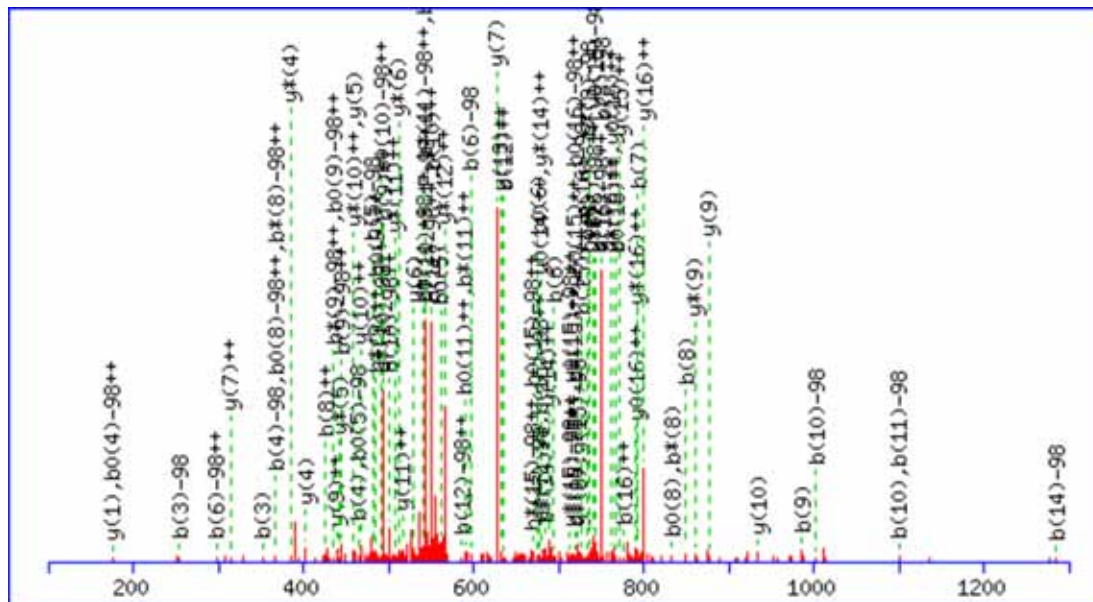

**Monoisotopic mass of neutral peptide Mr(calc):** 1725.8815

**Fixed modifications:** Carbamidomethyl (C) (apply to specified residues or termini only)

**Variable modifications:**

**N-term :** Dimethyl (N-term)

**S3 :** Phospho (ST), with neutral losses 97.9769(shown in table), 0.0000

**K17 :** Dimethyl (K)

**Ions Score:** 40 **Expect:** 0.0057

**Matched b ions:** b(3)-98, b(3), b(4)-98, b(4), b(5)-98, b(6)-98, b(6)-98, b(6), b(7), b(8)-98, b(8), b(8)++, b(9)-98, b(9), b(9)++, b(10), b(10)++, b(10)-98, b(10)-98, b(10)-98, b(11)-98, b(11)-98, b(11)-98, b(12)-98, b(12)++, b(14)-98, b(15)-98, b(15)++, b(16)-98, b(16)++

**Matched y ions:** y(1), y(4), y(5), y(6), y(7), y(7)++, y(8), y(9)++, y(9), y(10), y(10)++, y(11)++, y(13)++, y(14)++, y(15)-98, y(15)++, y(16)-98, y(16)++

**Precursor origin neutral loss:** +

## Peptide No.1215

**VGSLTPPSSPK**

**Confirmed sites:** @S:3,@S:9

**Ambiguous sites:**

**MS/MS Fragmentation of VGSLTPPSSPK**

Found in **AAK1\_MOUSE**, AP2-associated protein kinase 1 OS=Mus musculus GN=Aak1 PE=1 SV=2

Match to Query 1567: 1284.577358 from(643.295955,2+)

Title: Elution from: 34.493 to 34.493 scan no 2919 cid35.00 polarity:+:MA10





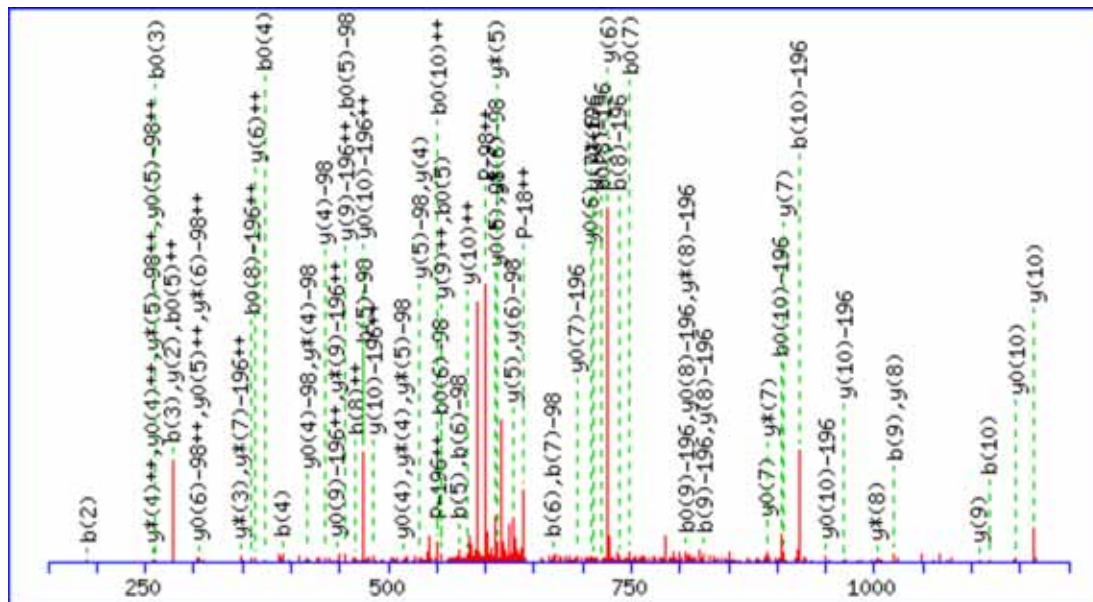

**Monoisotopic mass of neutral peptide Mr(calc):** 1296.6404

**Fixed modifications:** Carbamidomethyl (C) (apply to specified residues or termini only)

**Variable modifications:**

**N-term :** Dimethyl:2H(4)13C(2) (N-term)

**T5 :** Phospho (ST), with neutral losses 97.9769(shown in table), 0.0000

**S8 :** Phospho (ST), with neutral losses 97.9769(shown in table), 0.0000

**K11 :** Dimethyl:2H(4)13C(2) (K)

**Ions Score:** 35 **Expect:** 0.011

**Matched b ions:** b(2), b(3), b(4), b(5)-98, b(5), b(6)-98, b(6), b(7)-98, b(8)-196, b(8)++, b(8)-98, b(9)-98, b(9), b(9)-196, b(10)-196, b(10)-98, b(10)

**Matched y ions:** y(2), y(4)-98, y(4), y(5), y(5)-98, y(6), y(6)++, y(6)-98, y(7), y(7)-98, y(7)-196, y(8)-98, y(8), y(8)-196, y(9)-196++, y(9), y(9)++, y(9)-98++, y(10), y(10)-98, y(10)-196++, y(10)++, y(10)-98++, y(10)-196

**Precursor origin neutral loss:** +

## Peptide No.1217

**VIENTDGSEEEMDAR**

**Confirmed sites: @S:8**

**Ambiguous sites:**

MS/MS Fragmentation of **VIENTDGSEEEMDAR**

Found in **MYH11\_MOUSE**, Myosin-11 OS=Mus musculus GN=Myh11 PE=1 SV=1

Match to Query 3496: 1817.702638 from(909.858595,2+)

Title: Elution from: 26.338 to 26.338 scan no 1664 cid35.00 polarity:+:MA10







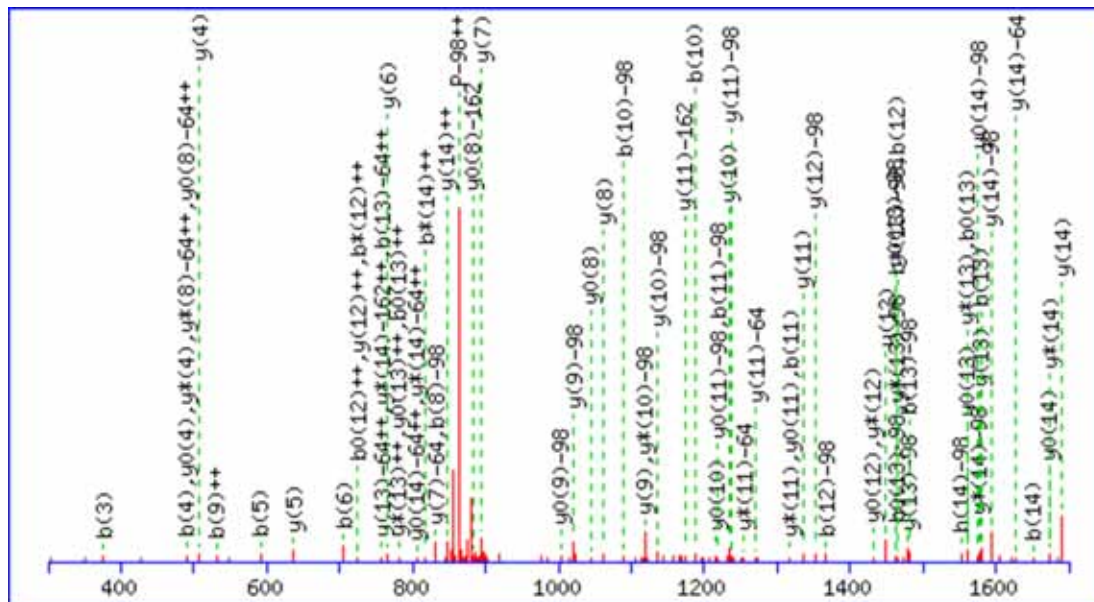

**Monoisotopic mass of neutral peptide Mr(calc):** 1823.7344

**Fixed modifications:** Carbamidomethyl (C) (apply to specified residues or termini only)

**Variable modifications:**

**N-term :** Dimethyl:2H(4)13C(2) (N-term)

**S8 :** Phospho (ST), with neutral losses 0.0000(shown in table), 97.9769

**M12 :** Oxidation (M), with neutral losses 0.0000(shown in table), 63.9983

**Ions Score:** 67 **Expect:** 4.4e-006

**Matched b ions:** b(3), b(4), b(5), b(6), b(8)-98, b(9)++, b(10), b(10)-98, b(11), b(11)-98, b(12)-98, b(12), b(13), b(13)-98, b(14), b(14)-98

**Matched y ions:** y(4), y(5), y(6), y(7), y(8), y(9)-98, y(9), y(10), y(10)-98, y(11), y(11)-98, y(12), y(12)-98, y(12)++, y(13)-98, y(13), y(14)-98, y(14), y(14)++

**Precursor origin neutral loss:** +

## Peptide No.1220

**VKSPEPVTSHPK**

**Confirmed sites:** @S:3

**Ambiguous sites:**

MS/MS Fragmentation of **VKSPEPVTSHPK**

Found in **TITIN\_MOUSE**, Titin OS=Mus musculus GN=Ttn PE=1 SV=1

Match to Query 2296: 1468.769553 from(490.597127,3+)

Title: Elution from: 19.931 to 19.931 scan no 966 cid35.00 polarity:+MA10

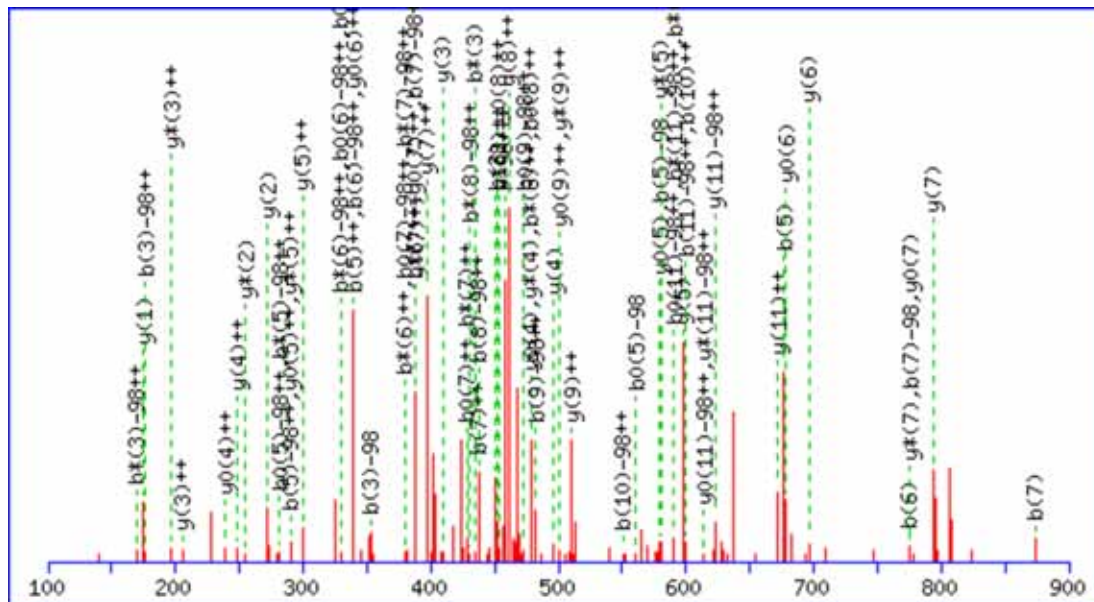

**Monoisotopic mass of neutral peptide Mr(calc):** 1468.7691

**Fixed modifications:** Carbamidomethyl (C) (apply to specified residues or termini only)

**Variable modifications:**

**N-term :** Dimethyl (N-term)

**K2 :** Dimethyl (K)

**S3 :** Phospho (ST), with neutral losses 0.0000(shown in table), 97.9769

**K12 :** Dimethyl (K)

**Ions Score:** 41 **Expect:** 0.0033

**Matched b ions:** b(3), b(3)-98++, b(3)-98, b(5)++, b(5), b(5)-98++, b(5)-98, b(6)-98++, b(6)++, b(6), b(7), b(7)-98++, b(7)++, b(7)-98, b(8)-98++, b(9)-98++, b(10)++, b(10)-98++, b(11)-98++

**Matched y ions:** y(1), y(2), y(3)++, y(3), y(4)++, y(4), y(5), y(5)++, y(6), y(7)++, y(7), y(8)++, y(9)++, y(11)++, y(11)-98++

**Precursor origin neutral loss:** +

## Peptide No.1221

**VKSPEPVTSHPK**

**Confirmed sites:** @S:3

**Ambiguous sites:**

**MS/MS Fragmentation of VKSPEPVTSHPK**

Found in **TITIN\_MOUSE**, Titin OS=Mus musculus GN=Ttn PE=1 SV=1

Match to Query 1832: 1486.864518 from(496.628782,3+)

Title: Elution from: 19.839 to 19.839 scan no 920 cid35.00 polarity:+:MA10

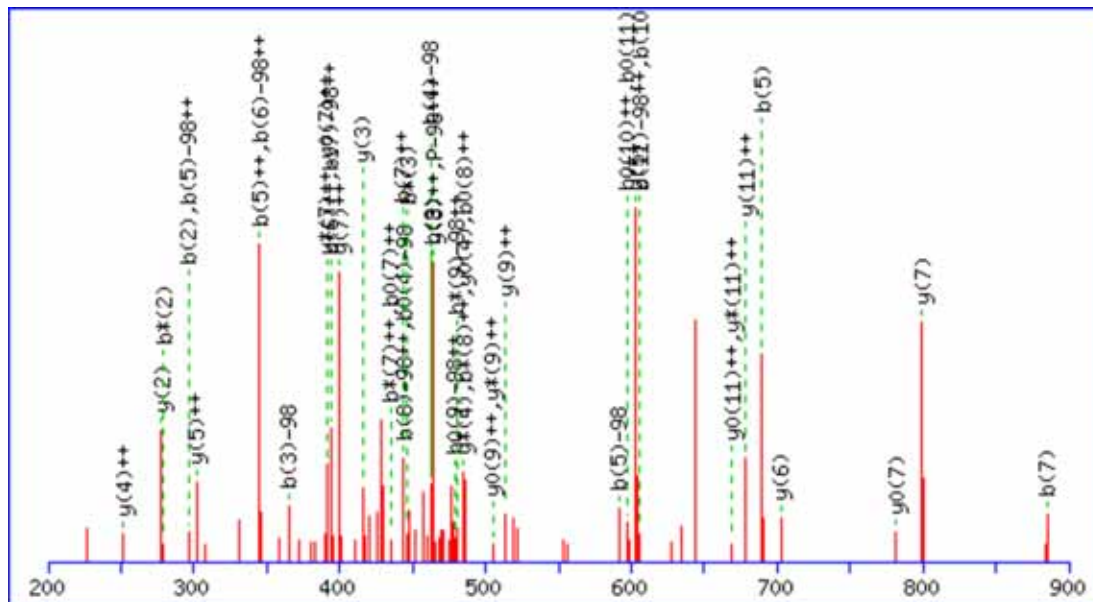

**Monoisotopic mass of neutral peptide Mr(calc):** 1486.8645

**Fixed modifications:** Carbamidomethyl (C) (apply to specified residues or termini only)

**Variable modifications:**

**N-term :** Dimethyl:2H(4)13C(2) (N-term)

**K2 :** Dimethyl:2H(4)13C(2) (K)

**S3 :** Phospho (ST), with neutral losses 0.0000(shown in table), 97.9769

**K12 :** Dimethyl:2H(4)13C(2) (K)

**Ions Score:** 50 **Expect:** 0.00029

**Matched b ions:** b(2), b(3), b(3)-98, b(4)-98, b(5)++, b(5), b(5)-98, b(5)-98++, b(6)-98++, b(6)++, b(7), b(7)-98++, b(7)++, b(8)-98++, b(10)++, b(11)-98++

**Matched y ions:** y(2), y(3), y(4)++, y(5), y(5)++, y(6), y(7), y(7)++, y(8)++, y(9)++, y(10)++, y(11)++

**Precursor origin neutral loss:** +

## Peptide No.1222

**VMDSDEDDADY**

**Confirmed sites:** @S:4

**Ambiguous sites:**

MS/MS Fragmentation of **VMDSDEDDADY**

Found in **PDCD5\_MOUSE**, Programmed cell death protein 5 OS=Mus musculus GN=Pdcd5 PE=1 SV=3

Match to Query 1342: 1403.454348 from(702.734450,2+)

Title: Elution from: 31.079 to 31.079 scan no 2155 cid35.00 polarity:+:MA10

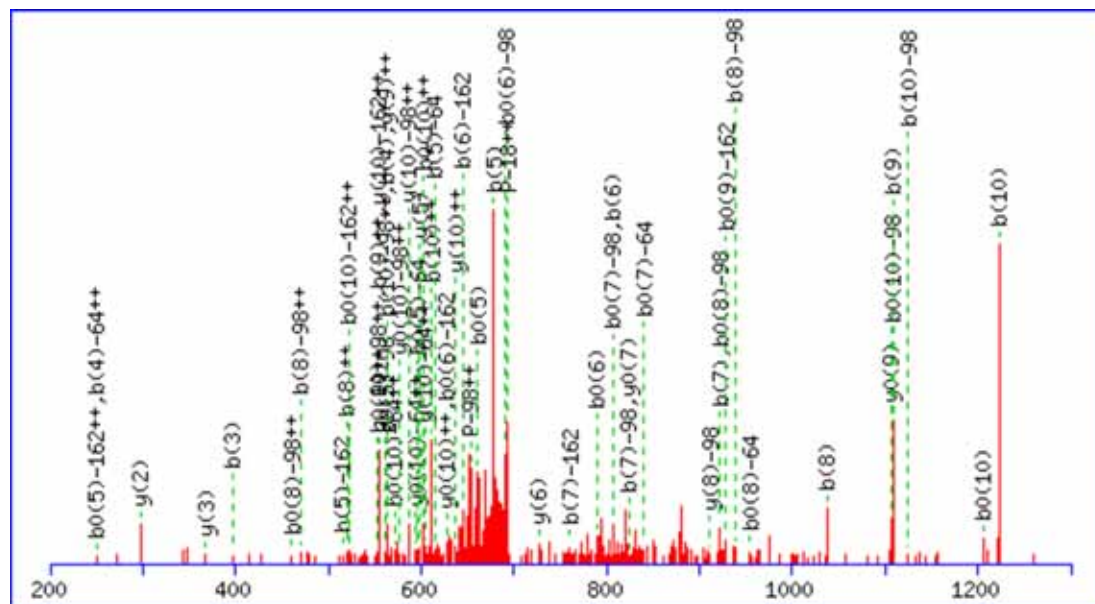

**Monoisotopic mass of neutral peptide Mr(calc):** 1403.4536

**Fixed modifications:** Carbamidomethyl (C) (apply to specified residues or termini only)

**Variable modifications:**

**N-term :** Dimethyl:2H(4)13C(2) (N-term)

**M2 :** Oxidation (M), with neutral losses 0.0000(shown in table), 63.9983

**S4 :** Phospho (ST), with neutral losses 0.0000(shown in table), 97.9769

**Ions Score:** 23 **Expect:** 0.021

**Matched b ions:** b(3), b(4), b(5), b(6), b(7), b(7)-98, b(8), b(8)-98++, b(8)++, b(8)-98, b(9), b(9)++, b(10)++, b(10), b(10)-98++, b(10)-98

**Matched y ions:** y(2), y(3), y(5), y(6), y(8)-98, y(9)++, y(10)-98++, y(10)++

**Precursor origin neutral loss:** +

## Peptide No.1223

**VMHTQCHSTPDSAEDVR**

**Confirmed sites:** @S:12

**Ambiguous sites:**

MS/MS Fragmentation of **VMHTQCHSTPDSAEDVR**

Found in **FETUA\_MOUSE**, Alpha-2-HS-glycoprotein OS=Mus musculus GN=Ahsg PE=1 SV=1

Match to Query 4855: 2092.835748 from(698.619192,3+)

Title: Elution from: 20.924 to 20.924 scan no 1031 cid35.00 polarity:+:MA10



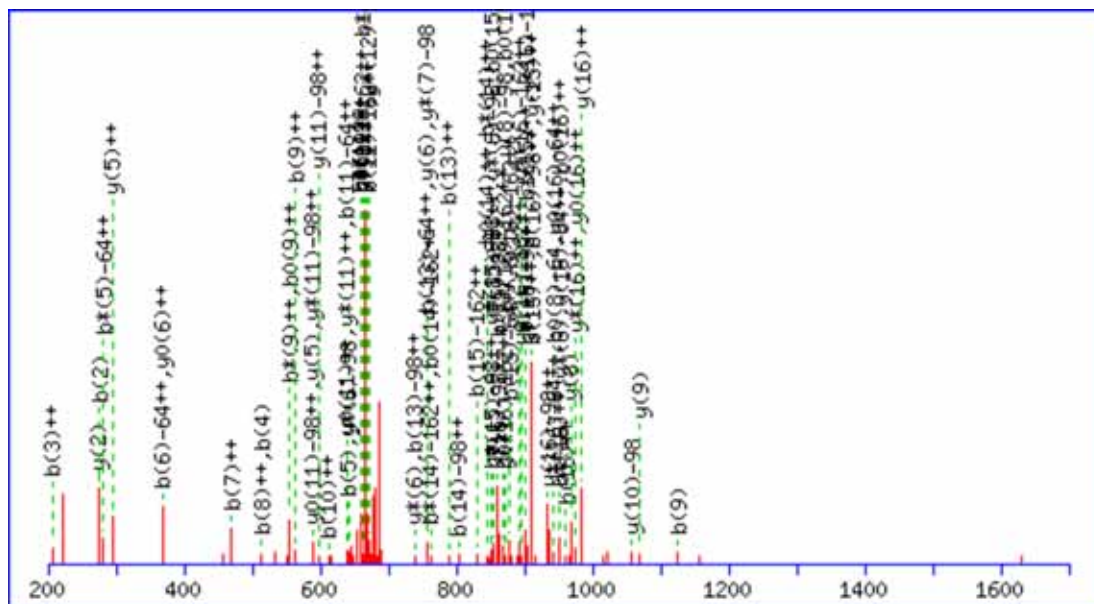

**Monoisotopic mass of neutral peptide Mr(calc):** 2092.8344

**Fixed modifications:** Carbamidomethyl (C) (apply to specified residues or termini only)

**Variable modifications:**

**N-term :** Dimethyl (N-term)

**M2 :** Oxidation (M), with neutral losses 0.0000(shown in table), 63.9983

**S12 :** Phospho (ST), with neutral losses 97.9769(shown in table), 0.0000

**Ions Score:** 53 **Expect:** 0.00015

**Matched b ions:** b(2), b(3)++, b(4), b(5), b(7)++, b(8)++, b(9), b(9)++, b(10)++, b(11)++, b(13)++, b(13)-98++, b(14)-98++, b(14)++, b(15)-98++, b(15)++, b(16)-98++, b(16)++

**Matched y ions:** y(2), y(5), y(5)++, y(6), y(6)-98, y(7), y(8), y(8)-98, y(9), y(10)-98, y(11)-98++, y(15)-98++, y(15)++, y(16)++, y(16)-98++

**Precursor origin neutral loss:** +

## Peptide No.1224

**VMHTQCHSTPDSAEDVR**

**Confirmed sites:** @S:8

**Ambiguous sites:**

**MS/MS Fragmentation of VMHTQCHSTPDSAEDVR**

Found in **FETUA\_MOUSE**, Alpha-2-HS-glycoprotein OS=Mus musculus GN=Ahsg PE=1 SV=1

Match to Query 5235: 2092.835049 from(698.618959,3+)

Title: Elution from: 21.101 to 21.101 scan no 1047 cid35.00 polarity:+:MA10

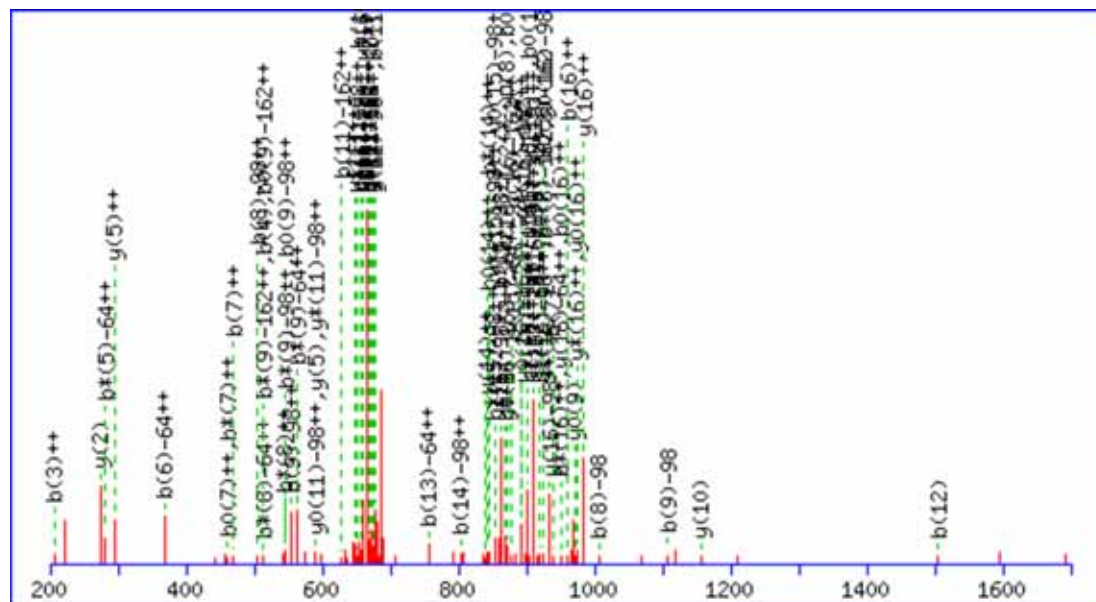

**Monoisotopic mass of neutral peptide Mr(calc):** 2092.8344

**Fixed modifications:** Carbamidomethyl (C) (apply to specified residues or termini only)

**Variable modifications:**

**N-term :** Dimethyl (N-term)

**M2 :** Oxidation (M), with neutral losses 0.0000(shown in table), 63.9983

**S8 :** Phospho (ST), with neutral losses 97.9769(shown in table), 0.0000

**Ions Score:** 34 **Expect:** 0.013

**Matched b ions:** b(3)++, b(4), b(7)++, b(7), b(8)-98, b(8)-98++, b(9)-98++, b(9)-98, b(10)++, b(11)-98++, b(12), b(14)-98++, b(14)++, b(15)-98++, b(15)++, b(16)-98++, b(16)++

**Matched y ions:** y(2), y(5)++, y(5), y(6), y(10), y(11)++, y(12)-98++, y(14)++, y(15)-98++, y(15)++, y(16)++, y(16)-98++

**Precursor origin neutral loss:** +

## Peptide No.1225

**VMHTQCHSTPDSAEDVR**

**Confirmed sites:** @T:4

**Ambiguous sites:**

**MS/MS Fragmentation of VMHTQCHSTPDSAEDVR**

Found in **FETUA\_MOUSE**, Alpha-2-HS-glycoprotein OS=Mus musculus GN=Ahsg PE=1 SV=1

Match to Query 6124: 2092.836120 from(524.216306,4+)

Title: Elution from: 21.095 to 21.095 scan no 1114 cid35.00 polarity:+:MA10:m1s

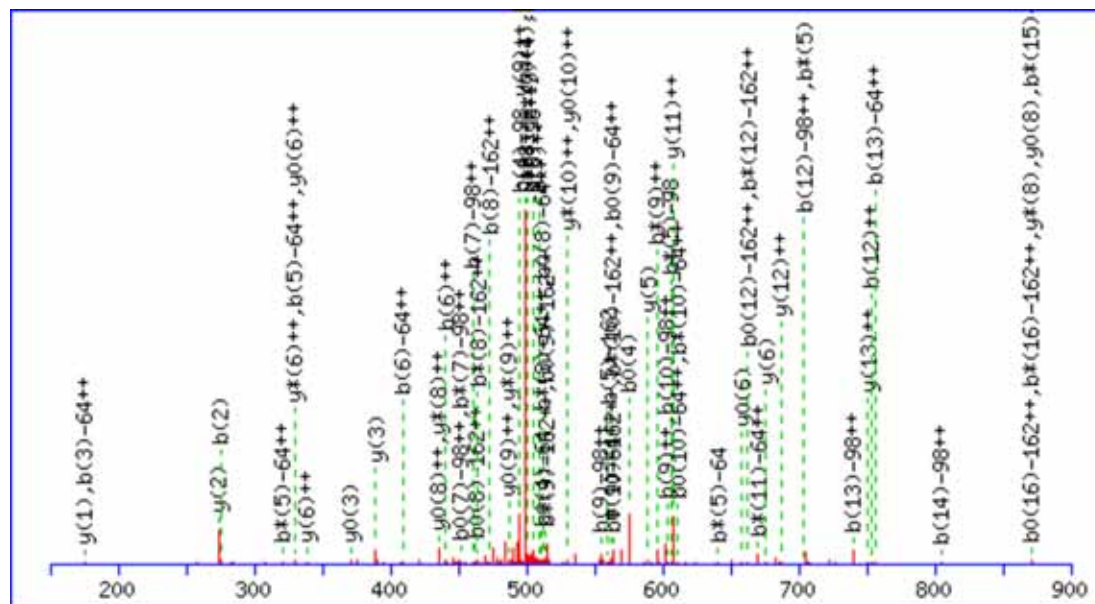

**Monoisotopic mass of neutral peptide Mr(calc):** 2092.8344

**Fixed modifications:** Carbamidomethyl (C) (apply to specified residues or termini only)

**Variable modifications:**

**N-term :** Dimethyl (N-term)

**M2 :** Oxidation (M), with neutral losses 0.0000(shown in table), 63.9983

**T4 :** Phospho (ST), with neutral losses 97.9769(shown in table), 0.0000

**Ions Score:** 31 **Expect:** 0.028

**Matched b ions:** b(2), b(4)-98, b(6)++, b(7)-98++, b(7)++, b(8)-98++, b(9)++, b(9)-98++, b(10)-98++, b(12)-98++, b(12)++, b(13)-98++, b(14)-98++

**Matched y ions:** y(1), y(2), y(3), y(5), y(6)++, y(6), y(9)++, y(11)++, y(12)++, y(13)++

**Precursor origin neutral loss:** +

## Peptide No.1226

**VMHTQCHSTPDSAEDVR**

**Confirmed sites:** @T:9

**Ambiguous sites:**

**MS/MS Fragmentation of VMHTQCHSTPDSAEDVR**

Found in **FETUA\_MOUSE**, Alpha-2-HS-glycoprotein OS=Mus musculus GN=Ahsg PE=1 SV=1

Match to Query 6123: 2092.836111 from(698.619313,3+)

Title: Elution from: 21.055 to 21.055 scan no 1109 cid35.00 polarity:+:MA10:m1s

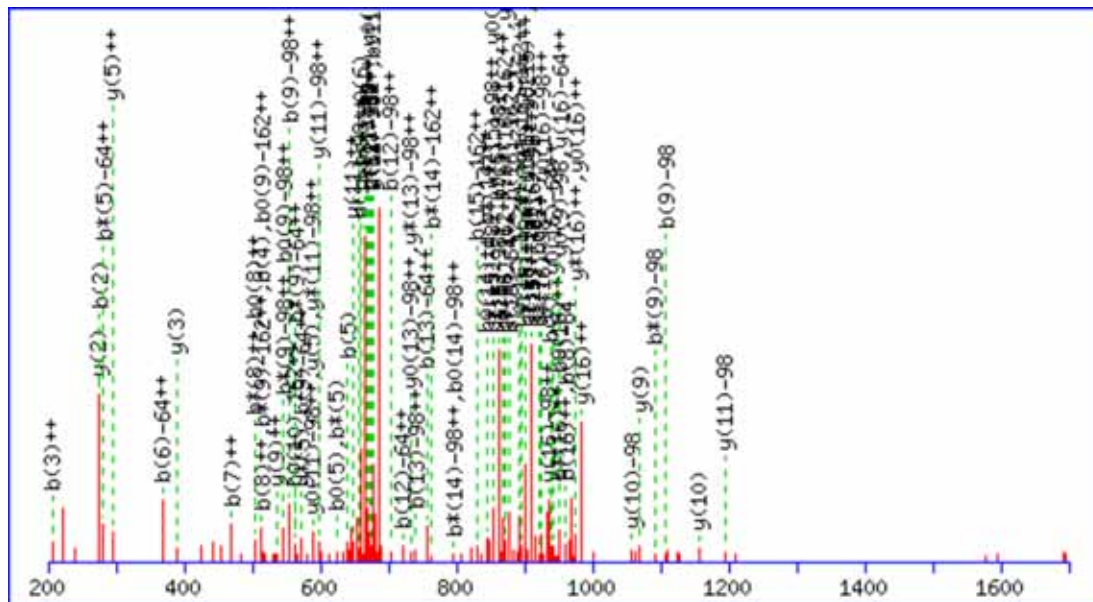

**Monoisotopic mass of neutral peptide Mr(calc):** 2092.8344

**Fixed modifications:** Carbamidomethyl (C) (apply to specified residues or termini only)

**Variable modifications:**

**N-term :** Dimethyl (N-term)

**M2 :** Oxidation (M), with neutral losses 0.0000(shown in table), 63.9983

**T9 :** Phospho (ST), with neutral losses 97.9769(shown in table), 0.0000

**Ions Score:** 42 **Expect:** 0.0019

**Matched b ions:** b(2), b(3)++, b(4), b(5), b(7)++, b(7), b(8)++, b(9)-98++, b(9)-98, b(11)-98++, b(12)-98++, b(13)-98++, b(14)++, b(15)-98++, b(15)++, b(16)-98++, b(16)++

**Matched y ions:** y(2), y(3), y(5)++, y(5), y(6), y(9), y(9)++, y(10), y(10)-98, y(11)-98, y(11)-98++, y(11)++, y(12)-98++, y(15)-98++, y(15)++, y(16)++, y(16)-98++

**Precursor origin neutral loss:** +

## Peptide No.1227

**VMHTQCHSTPDSAEDVRK**

**Confirmed sites:** @S:12

**Ambiguous sites:**

MS/MS Fragmentation of **VMHTQCHSTPDSAEDVRK**

Found in **FETUA\_MOUSE**, Alpha-2-HS-glycoprotein OS=Mus musculus GN=Ahsg PE=1 SV=1

Match to Query 5434: 2248.962870 from(750.661566,3+)

Title: Elution from: 20.006 to 20.006 scan no 962 cid35.00 polarity:+:MA10:m1s



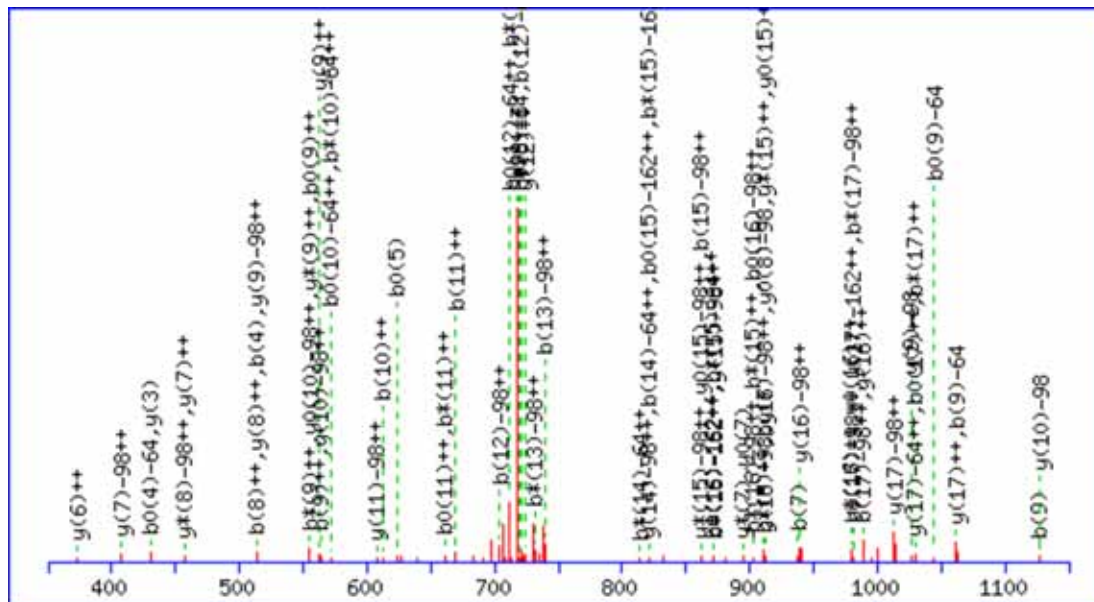

**Monoisotopic mass of neutral peptide Mr(calc):** 2248.9606

**Fixed modifications:** Carbamidomethyl (C) (apply to specified residues or termini only)

**Variable modifications:**

**N-term :** Dimethyl (N-term)

**M2 :** Oxidation (M), with neutral losses 0.0000(shown in table), 63.9983

**S12 :** Phospho (ST), with neutral losses 97.9769(shown in table), 0.0000

**K18 :** Dimethyl (K)

**Ions Score:** 66 **Expect:** 1.3e-005

**Matched b ions:** b(4), b(7), b(8)++, b(9), b(9)++, b(10)++, b(11)++, b(12)-98++, b(13)-98++, b(15)-98++, b(15)++, b(16)-98++, b(17)-98++

**Matched y ions:** y(3), y(6)++, y(7)-98++, y(7)++, y(7), y(8)++, y(9)-98++, y(9)++, y(9)-98, y(10)-98, y(10)-98++, y(11)-98++, y(12)++, y(14)-98++, y(15)-98++, y(16)-98++, y(16)++, y(17)-98++, y(17)++

**Precursor origin neutral loss:** +

## Peptide No.1228

**VMHTQCHSTPDSAEDVRK**

**Confirmed sites:** @S:12

**Ambiguous sites:**

**MS/MS Fragmentation of VMHTQCHSTPDSAEDVRK**

Found in **FETUA\_MOUSE**, Alpha-2-HS-glycoprotein OS=Mus musculus GN=Ahsg PE=1 SV=1

Match to Query 5489: 2261.026059 from(754.682629,3+)

Title: Elution from: 20.143 to 20.143 scan no 950 cid35.00 polarity:+:MA10:m1s

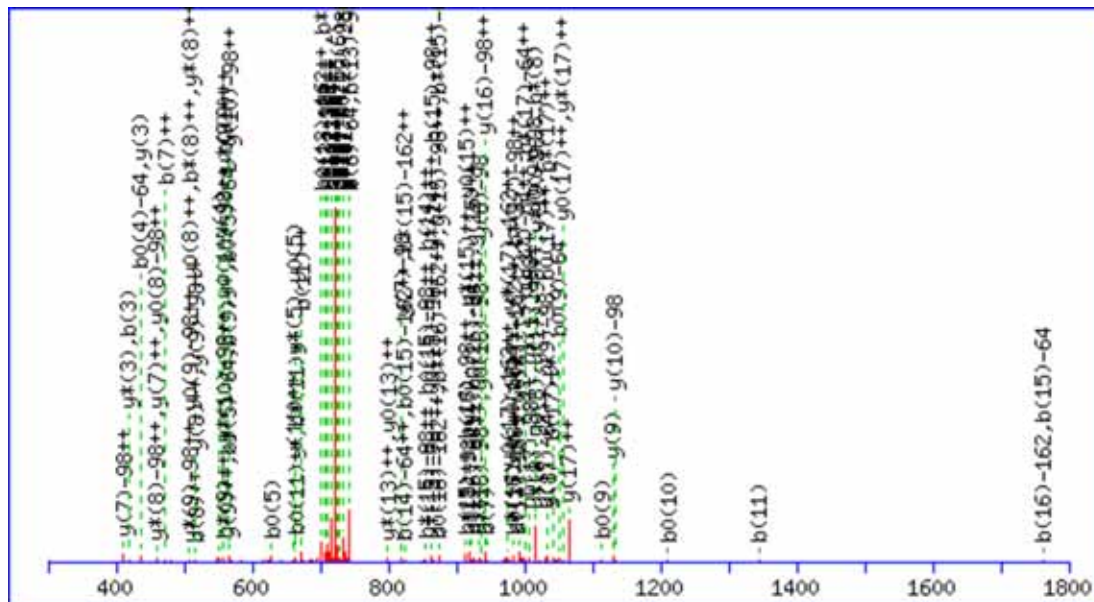

**Monoisotopic mass of neutral peptide Mr(calc):** 2261.0242

**Fixed modifications:** Carbamidomethyl (C) (apply to specified residues or termini only)

**Variable modifications:**

**N-term :** Dimethyl:2H(4)13C(2) (N-term)

**M2 :** Oxidation (M), with neutral losses 0.0000(shown in table), 63.9983

**S12 :** Phospho (ST), with neutral losses 97.9769(shown in table), 0.0000

**K18 :** Dimethyl:2H(4)13C(2) (K)

**Ions Score:** 42 **Expect:** 0.0055

**Matched b ions:** b(3), b(7)++, b(7), b(8)++, b(9)++, b(11), b(11)++, b(12)-98++, b(13)-98++, b(14)++, b(15)-98++, b(15)++, b(16)-98++, b(17)-98++, b(17)++

**Matched y ions:** y(3), y(4), y(7)-98++, y(7), y(7)++, y(7)-98, y(8), y(8)++, y(8)-98, y(9)++, y(9), y(9)-98, y(9)-98++, y(10)-98++, y(10)-98, y(11)++, y(12)++, y(15)-98++, y(15)++, y(16)-98++, y(16)++, y(17)++, y(17)-98++

**Precursor origin neutral loss:** +

## Peptide No.1229

**VMHTQCHSTPDSAEDVRK**

**Confirmed sites:** @S:12

**Ambiguous sites:**

**MS/MS Fragmentation of VMHTQCHSTPDSAEDVRK**

Found in **FETUA\_MOUSE**, Alpha-2-HS-glycoprotein OS=Mus musculus GN=Ahsg PE=1 SV=1

Match to Query 5438: 2245.031280 from(562.265096,4+)

Title: Elution from: 21.417 to 21.417 scan no 1077 cid35.00 polarity:+:MA10:m1s

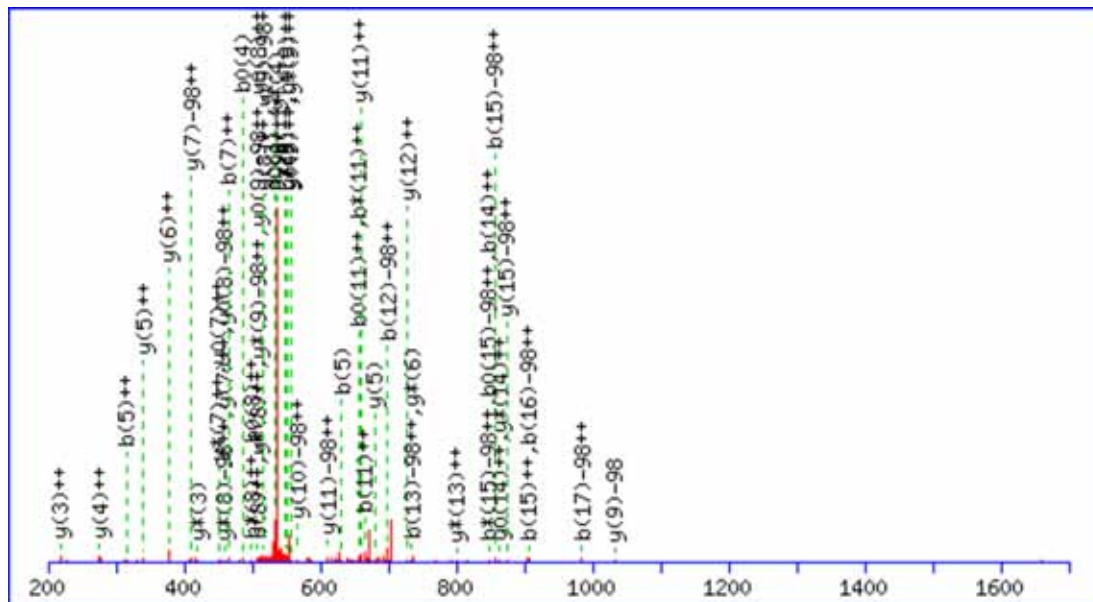

**Monoisotopic mass of neutral peptide Mr(calc):** 2245.0293

**Fixed modifications:** Carbamidomethyl (C) (apply to specified residues or termini only)

**Variable modifications:**

**N-term :** Dimethyl:2H(4)13C(2) (N-term)

**S12 :** Phospho (ST), with neutral losses 97.9769(shown in table), 0.0000

**K18 :** Dimethyl:2H(4)13C(2) (K)

**Ions Score:** 34 **Expect:** 0.031

**Matched b ions:** b(5)++, b(5), b(7)++, b(8)++, b(11)++, b(12)-98++, b(13)-98++, b(14)++, b(15)++, b(15)-98++, b(16)-98++, b(17)-98++

**Matched y ions:** y(3)++, y(4)++, y(4), y(5)++, y(5), y(6)++, y(7)-98++, y(7)++, y(8)++, y(9)-98, y(9)-98++, y(10)-98++, y(11)-98++, y(11)++, y(12)++, y(15)-98++

**Precursor origin neutral loss:** +

## Peptide No.1230

**VNHEPEPASGASPGATIPK**

**Confirmed sites:** @S:12

**Ambiguous sites:**

MS/MS Fragmentation of **VNHEPEPASGASPGATIPK**

Found in **BIN1\_MOUSE**, Myc box-dependent-interacting protein 1 OS=Mus musculus GN=Bin1 PE=1 SV=1

Match to Query 5157: 1993.953114 from(665.658314,3+)

Title: Elution from: 30.323 to 30.323 scan no 2183 cid35.00 polarity:+:MA10:m1s

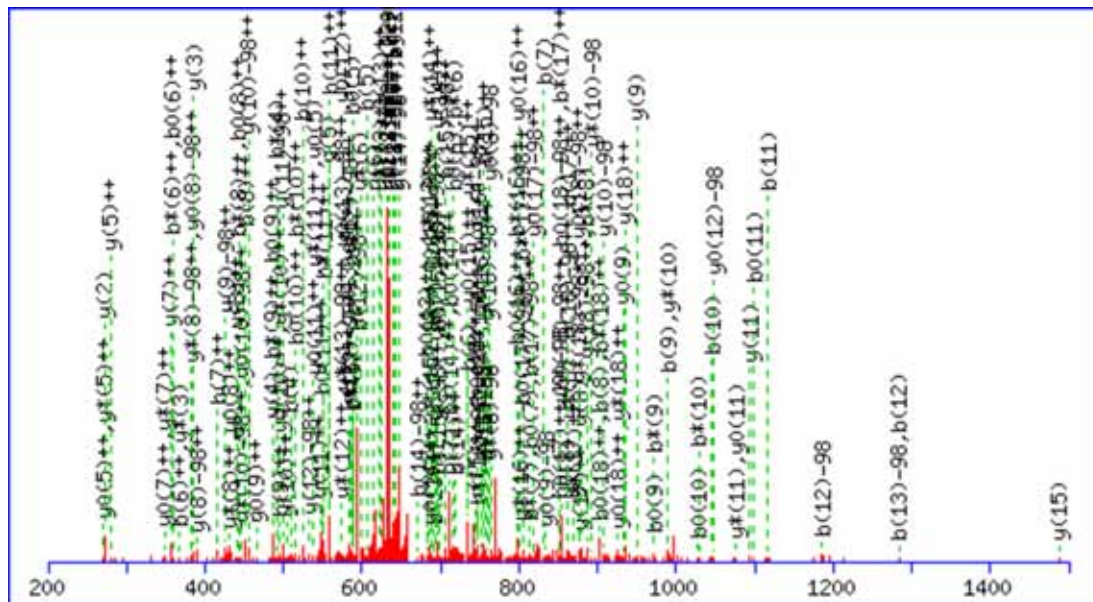

**Monoisotopic mass of neutral peptide Mr(calc):** 1993.9510

**Fixed modifications:** Carbamidomethyl (C) (apply to specified residues or termini only)

**Variable modifications:**

**N-term :** Dimethyl (N-term)

**S12 :** Phospho (ST), with neutral losses 97.9769(shown in table), 0.0000

**K19 :** Dimethyl (K)

**Ions Score:** 53 **Expect:** 0.00034

**Matched b ions:** b(4), b(5), b(6), b(6)++, b(7)++, b(7), b(8)++, b(8), b(9), b(9)++, b(10), b(10)++, b(11)++, b(11), b(12)-98, b(12), b(12)-98++, b(12)++, b(13)-98, b(13)-98++, b(13)++, b(14)-98++, b(14)++, b(15)++, b(15)-98++, b(16)-98++, b(17)++, b(17)-98++, b(18)-98++

**Matched y ions:** y(2), y(3), y(4), y(5)++, y(5), y(6), y(7)++, y(7), y(8), y(8)-98++, y(8)++, y(9)-98++, y(9)-98, y(9), y(10)-98++, y(10)++, y(10)-98, y(11), y(11)++, y(11)-98++, y(12)-98++, y(12)++, y(13)++, y(13)-98++, y(14)-98++, y(14)++, y(15), y(15)-98++, y(15)++, y(16)-98++, y(17)++, y(18)++, y(18)-98++

**Precursor origin neutral loss:** +

## Peptide No.1231

**VNHEPEPASGASPGATIPK**

**Confirmed sites:** @S:12

**Ambiguous sites:**

MS/MS Fragmentation of **VNHEPEPASGASPGATIPK**

Found in **BIN1\_MOUSE**, Myc box-dependent-interacting protein 1 OS=Mus musculus GN=Bin1 PE=1 SV=1

Match to Query 4571: 2006.017380 from(669.679736,3+)

Title: Elution from: 30.279 to 30.279 scan no 2162 cid35.00 polarity:+:MA10:m1s



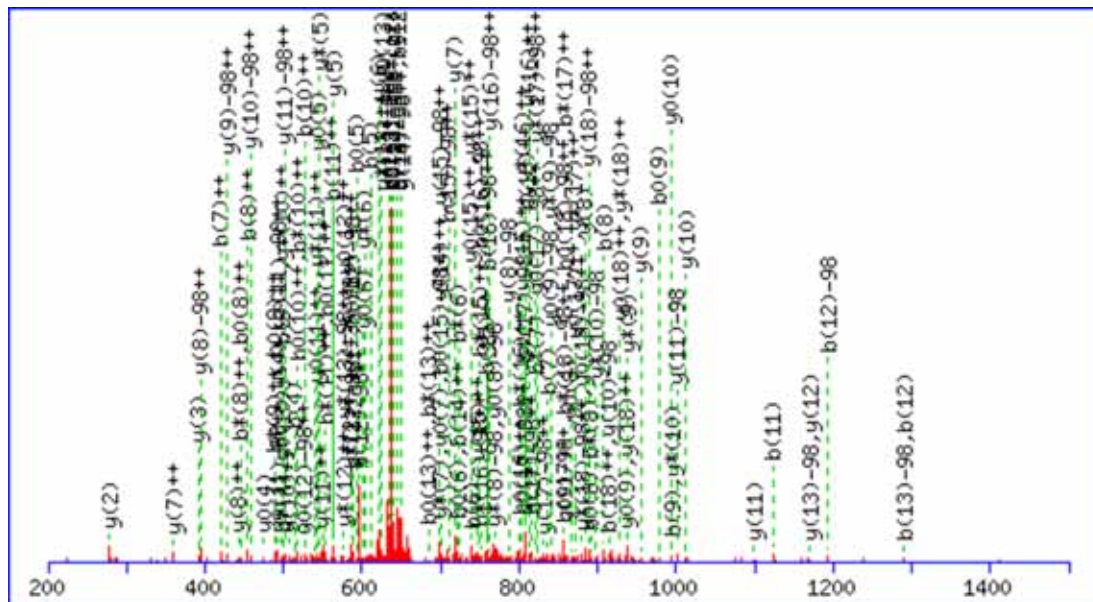

**Monoisotopic mass of neutral peptide Mr(calc):** 2006.0146

**Fixed modifications:** Carbamidomethyl (C) (apply to specified residues or termini only)

**Variable modifications:**

**N-term :** Dimethyl:2H(4)13C(2) (N-term)

**S12 :** Phospho (ST), with neutral losses 97.9769(shown in table), 0.0000

**K19 :** Dimethyl:2H(4)13C(2) (K)

**Ions Score:** 50 **Expect:** 0.00069

**Matched b ions:** b(4), b(5), b(6), b(7)++, b(7), b(8)++, b(8), b(9)++, b(9), b(10)++, b(11), b(11)++, b(12)-98++, b(12)-98, b(12), b(12)++, b(13)-98, b(13)-98++, b(14)++, b(15)++, b(15)-98++, b(16)-98++, b(16)++, b(17)-98++, b(18)++

**Matched y ions:** y(2), y(3), y(4), y(5), y(6), y(7)++, y(7), y(8)-98++, y(8), y(8)++, y(8)-98, y(9)-98++, y(9)-98, y(9), y(10)++, y(10)-98, y(10)-98++, y(10), y(11)-98, y(11), y(11)-98++, y(11)++, y(12)++, y(12), y(13)-98++, y(13)++, y(13)-98, y(14)-98++, y(14)++, y(15)-98++, y(15)++, y(16)-98++, y(16)++, y(17)-98++, y(18)++, y(18)-98++

**Precursor origin neutral loss:** +

## Peptide No.1232

**VPSDSSLGTPDGRPELR**

**Confirmed sites:** @S:3,@S:6

**Ambiguous sites:**

**MS/MS Fragmentation of VPSDSSLGTPDGRPELR**

Found in **CIP4\_MOUSE**, Cdc42-interacting protein 4 OS=Mus musculus GN=Trip10 PE=1 SV=2

Match to Query 5475: 1969.856460 from(657.626096,3+)

Title: Elution from: 38.000 to 38.000 scan no 3399 cid35.00 polarity:+:MA10:m1s





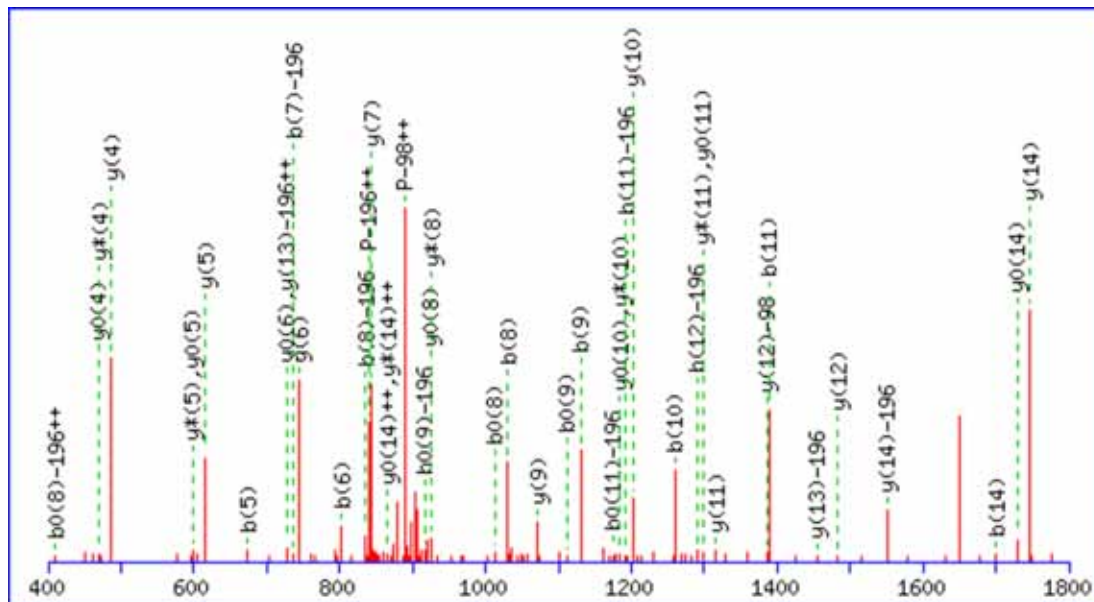

**Monoisotopic mass of neutral peptide Mr(calc):** 1873.7384

**Fixed modifications:** Carbamidomethyl (C) (apply to specified residues or termini only)

**Variable modifications:**

**N-term :** Dimethyl (N-term)

**S3 :** Phospho (ST), with neutral losses 0.0000(shown in table), 97.9769

**S4 :** Phospho (ST), with neutral losses 0.0000(shown in table), 97.9769

**Ions Score:** 65 **Expect:** 8.8e-006

**Matched b ions:** b(4)-98, b(5)-98, b(5), b(6), b(6)-98, b(7)-196, b(7)-98, b(8), b(8)-98, b(8)-196, b(9), b(9)-98, b(10), b(10)-98, b(11), b(11)-98, b(11)-196, b(12)-98, b(12)-196, b(13)-98, b(14)

**Matched y ions:** y(4), y(5), y(6), y(7), y(9), y(10), y(11), y(12), y(12)-98, y(13)-196, y(13)-196++, y(14)-196, y(14)-98, y(14)

**Precursor origin neutral loss:** +

## Peptide No.1235

**VPSSDEEVVEEPQSR**

**Confirmed sites:** @S:3,@S:4

**Ambiguous sites:**

MS/MS Fragmentation of **VPSSDEEVVEEPQSR**

Found in **TB182\_MOUSE**, 182 kDa tankyrase-1-binding protein OS=Mus musculus GN=Tnks1bp1 PE=1 SV=2

Match to Query 4254: 1879.772630 from(940.893591,2+)

Title: Elution from: 36.854 to 36.854 scan no 3044 cid35.00 polarity:+:MA10:m1s



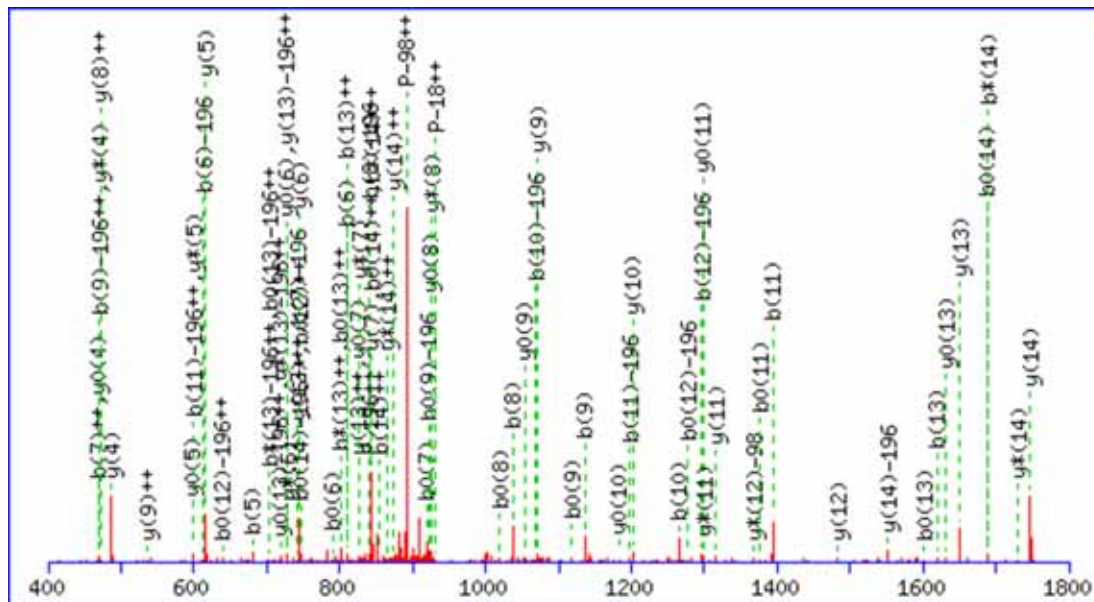

**Monoisotopic mass of neutral peptide Mr(calc):** 1879.7702

**Fixed modifications:** Carbamidomethyl (C) (apply to specified residues or termini only)

**Variable modifications:**

**N-term :** Dimethyl:2H(4)13C(2) (N-term)

**S3 :** Phospho (ST), with neutral losses 0.0000(shown in table), 97.9769

**S4 :** Phospho (ST), with neutral losses 0.0000(shown in table), 97.9769

**Ions Score:** 49 **Expect:** 0.00043

**Matched b ions:** b(4)-98, b(5), b(5)-98, b(6), b(6)-196, b(6)-98, b(7)++, b(7)-196, b(7)-98, b(8), b(8)-98++, b(8)-196, b(9), b(9)-196++, b(9)-98, b(10), b(10)-98, b(10)-196, b(11), b(11)-196++, b(11)-98, b(11)-196, b(12)-98, b(12)-196, b(12)++, b(13), b(13)-98, b(13)-98++, b(13)++, b(14)-98++, b(14)++

**Matched y ions:** y(4), y(5), y(6), y(7), y(8)++, y(9), y(9)++, y(10), y(11), y(12), y(12)++, y(13)-98, y(13), y(13)-196++, y(13)++, y(14)-196, y(14)-98, y(14), y(14)++

**Precursor origin neutral loss:** +

## Peptide No.1236

**VQEAQDSDSDTEGGATGGEAEMDFLR**

**Confirmed sites:** @S:7,@S:9

**Ambiguous sites:**

MS/MS Fragmentation of **VQEAQDSDSDTEGGATGGEAEMDFLR**

Found in **SIRT2\_MOUSE**, NAD-dependent deacetylase sirtuin-2 OS=Mus musculus GN=Sirt2 PE=1 SV=2

Match to Query 6807: 2902.089858 from(968.370562,3+)

Title: Elution from: 60.834 to 60.834 scan no 5642 cid35.00 polarity:+:MA10:m1s



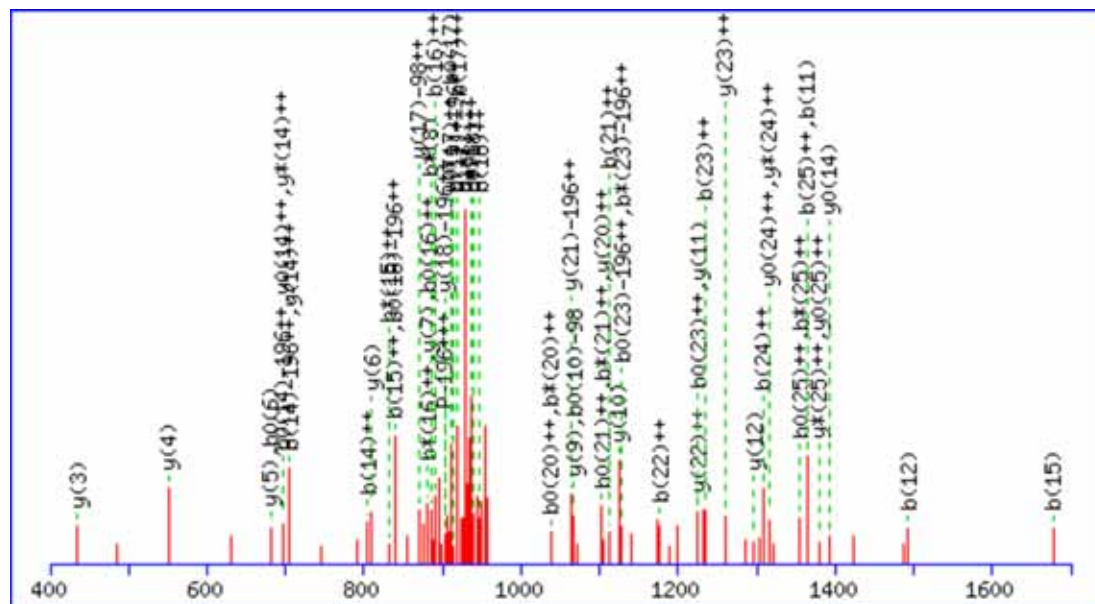

**Monoisotopic mass of neutral peptide Mr(calc):** 2902.0889

**Fixed modifications:** Carbamidomethyl (C) (apply to specified residues or termini only)

**Variable modifications:**

**N-term :** Dimethyl (N-term)

**S9 :** Phospho (ST), with neutral losses 0.0000(shown in table), 97.9769

**T11 :** Phospho (ST), with neutral losses 0.0000(shown in table), 97.9769

**Ions Score:** 48 **Expect:** 0.00047

**Matched b ions:** b(11), b(12), b(14)-196++, b(14)++, b(15), b(15)-98++, b(15)++, b(16)++, b(17)++, b(17)-98++, b(18)++, b(19)-196++, b(21)-98++, b(21)++, b(22)-98++, b(22)++, b(23)++, b(24)++, b(24)-98++, b(25)++, b(25)-98++

**Matched y ions:** y(3), y(4), y(5), y(6), y(7), y(9), y(10), y(11), y(12), y(14)++, y(17)++, y(17)-98++, y(18)-196++, y(20)++, y(21)-196++, y(21)-98++, y(22)++, y(23)++

**Precursor origin neutral loss:** +

## Peptide No.1238

**VQIPVSHPDPEPVSDNEDDSYDEEVHDPR**

**Confirmed sites:** @S:14,@Y:21

**Ambiguous sites:**

MS/MS Fragmentation of **VQIPVSHPDPEPVSDNEDDSYDEEVHDPR**

Found in **ZO1\_MOUSE**, Tight junction protein ZO-1 OS=Mus musculus GN=Tjp1 PE=1 SV=1

Match to Query 7715: 3503.411166 from(1168.810998,3+)

Title: Elution from: 44.599 to 44.599 scan no 4095 cid35.00 polarity:+:MA10:m1s

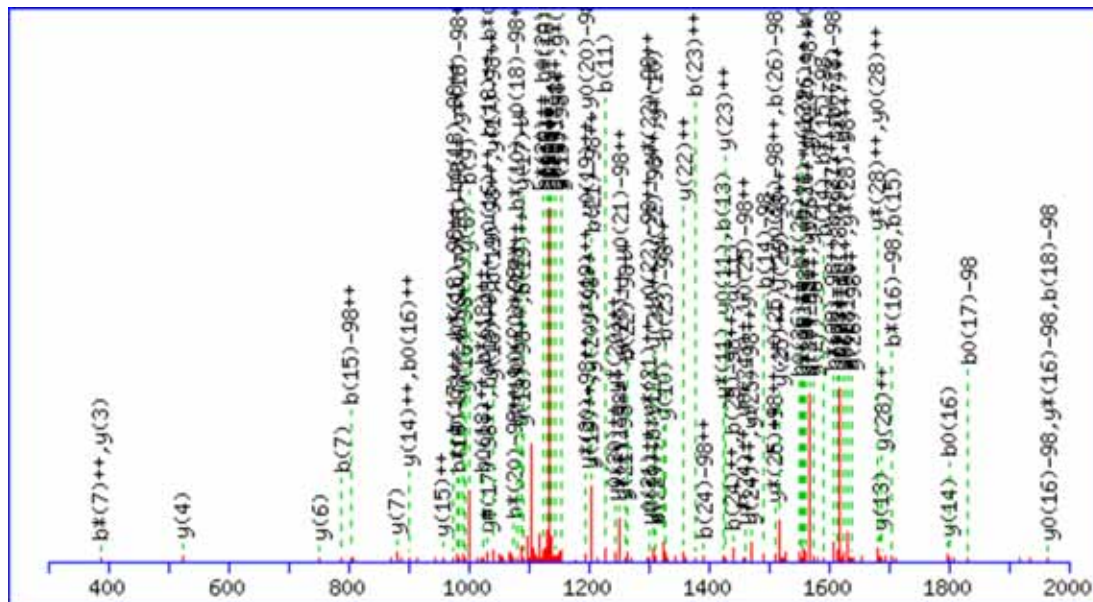

**Monoisotopic mass of neutral peptide Mr(calc):** 3503.4079

**Fixed modifications:** Carbamidomethyl (C) (apply to specified residues or termini only)

**Variable modifications:**

**N-term :** Dimethyl (N-term)

**S14 :** Phospho (ST), with neutral losses 0.0000(shown in table), 97.9769

**Y21 :** Phospho (Y)

**Ions Score:** 71 **Expect:** 5.8e-006

**Matched b ions:** b(7), b(9), b(11), b(13), b(14)-98, b(14), b(15), b(15)-98++, b(15)-98, b(17)++, b(18)-98++, b(18)-98, b(18)++, b(19)-98++, b(19)++, b(20)++, b(21)-98++, b(22)++, b(22)-98++, b(23)-98++, b(23)++, b(24)++, b(24)-98++, b(25)-98++, b(26)++, b(26)-98++, b(27)-98++, b(27)++, b(28)-98++

**Matched y ions:** y(3), y(4), y(6), y(7), y(8), y(10), y(11), y(12), y(13), y(14), y(14)++, y(15)++, y(16)++, y(16)-98++, y(17)-98++, y(17)++, y(18)++, y(18)-98++, y(19)++, y(19)-98++, y(20)-98++, y(20)++, y(21)++, y(21)-98++, y(22)-98++, y(22)++, y(23)++, y(24)++, y(25)-98++, y(25)++, y(26)++, y(26)-98++, y(27)++, y(27)-98++, y(28)++, y(28)-98++

**Precursor origin neutral loss:** +

## Peptide No.1239

**VQIPVSHPDPEPVSDNEDDSYDEEVH DPR**

**Confirmed sites:** @S:14

**Ambiguous sites:** @S:20orY:21

MS/MS Fragmentation of **VQIPVSHPDPEPVSDNEDDSYDEEVH DPR**

Found in **ZO1\_MOUSE**, Tight junction protein ZO-1 OS=Mus musculus GN=Tjp1 PE=1 SV=1

Match to Query 6795: 3509.440902 from(1170.820910,3+)

Title: Elution from: 44.439 to 44.439 scan no 3946 cid35.00 polarity:+:MA10:m1s



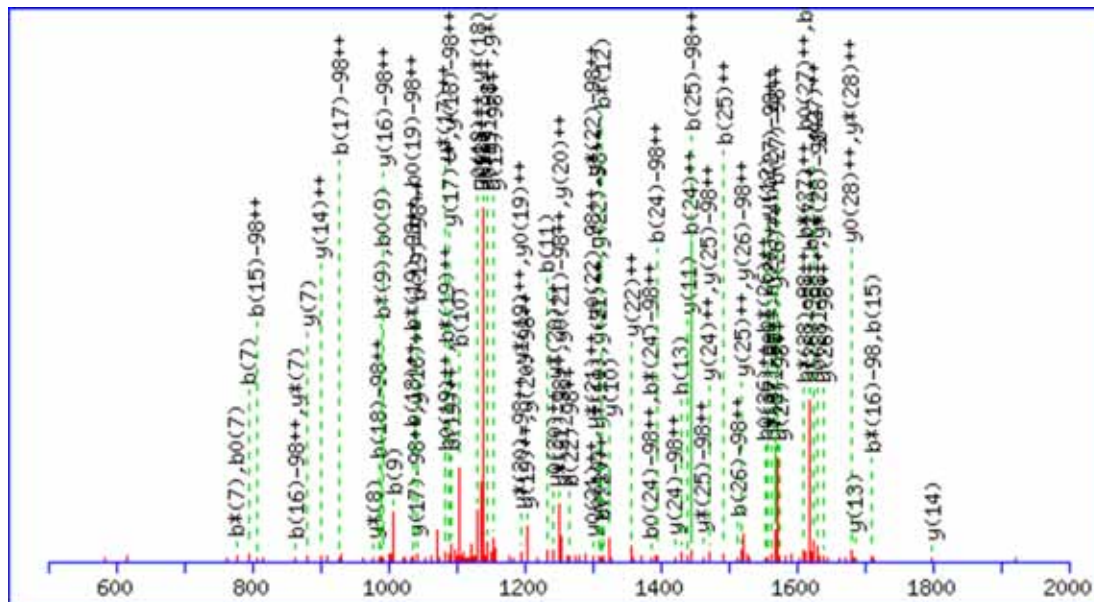

**Monoisotopic mass of neutral peptide Mr(calc): 3509.4398**

**Fixed modifications:** Carbamidomethyl (C) (apply to specified residues or termini only)

**Variable modifications:**

**N-term :** Dimethyl:2H(4)13C(2) (N-term)

**S14 :** Phospho (ST), with neutral losses 0.0000(shown in table), 97.9769

**Y21 :** Phospho (Y)

**Ions Score:** 48 **Expect:** 0.0014

**Matched b ions:** b(7), b(9), b(10), b(11), b(13), b(15), b(15)-98++, b(16)-98++, b(17)-98++, b(18)-98++, b(18)++, b(19)++, b(19)-98++, b(22)++, b(22)-98++, b(24)++, b(24)-98++, b(25)-98++, b(25)++, b(26)++, b(26)-98++, b(27)-98++, b(27)++, b(28)-98++

**Matched y ions:** y(7), y(10), y(11), y(12), y(13), y(14), y(14)++, y(16)++, y(16)-98++, y(17)-98++, y(17)++, y(18)++, y(18)-98++, y(19)++, y(19)-98++, y(20)++, y(20)-98++, y(21)++, y(22)++, y(22)-98++, y(24)++, y(24)-98++, y(25)-98++, y(25)++, y(26)++, y(26)-98++, y(27)++, y(27)-98++, y(28)-98++

**Precursor origin neutral loss:** +

## Peptide No.1240

**VRGWSPPEVR**

**Confirmed sites: @S:5**

**Ambiguous sites:**

MS/MS Fragmentation of **VRGWSPPEVR**

Found in **ACSA\_MOUSE**, Acetyl-coenzyme A synthetase, cytoplasmic OS=Mus musculus GN=Acss2 PE=1 SV=1

Match to Query 1807: 1392.711897 from(465.244575,3+)

Title: Elution from: 38.679 to 38.679 scan no 3327 cid35.00 polarity:+:MA10

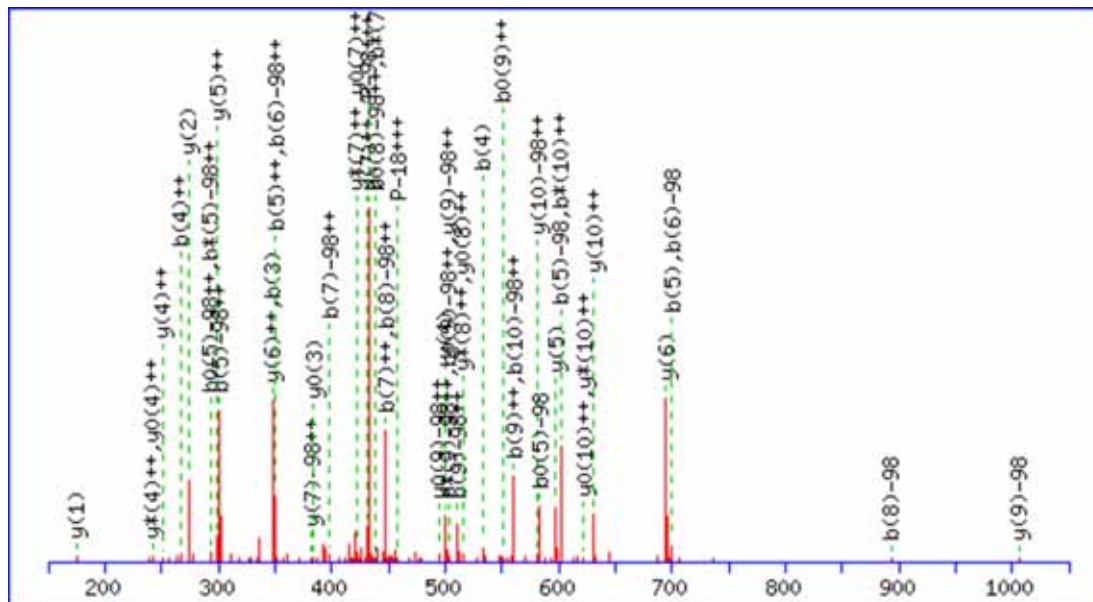

**Monoisotopic mass of neutral peptide Mr(calc):** 1392.7127

**Fixed modifications:** Carbamidomethyl (C) (apply to specified residues or termini only)

**Variable modifications:**

**N-term :** Dimethyl:2H(4)13C(2) (N-term)

**S5 :** Phospho (ST), with neutral losses 97.9769(shown in table), 0.0000

**Ions Score:** 55 **Expect:** 0.00013

**Matched b ions:** b(3), b(4)++, b(4), b(5)-98, b(5)-98++, b(5)++, b(5), b(6)-98++, b(6)-98, b(7)++, b(7)-98++, b(8)-98, b(8)-98++, b(9)++, b(9)-98++, b(10)-98++

**Matched y ions:** y(1), y(2), y(4), y(4)++, y(5), y(5)++, y(6)++, y(6), y(7)++, y(7)-98++, y(9)-98, y(9)-98++, y(10)++, y(10)-98++

**Precursor origin neutral loss:** +

## Peptide No.1241

**VSGNVSKELMLCYLIK PSTMTAEDMETPECMKR**

**Confirmed sites:** @S:2,@S:6,@S:18

**Ambiguous sites:** @T:19orT:21

MS/MS Fragmentation of **VSGNVSKELMLCYLIK PSTMTAEDMETPECMKR**

Found in **SEN2\_MOUSE**, tRNA-splicing endonuclease subunit Sen2 OS=Mus musculus GN=Tsen2 PE=1 SV=1

Match to Query 7924: 4245.756366 from(1416.259398,3+)

Title: Elution from: 51.694 to 51.694 scan no 4939 cid35.00 polarity:+:MA10



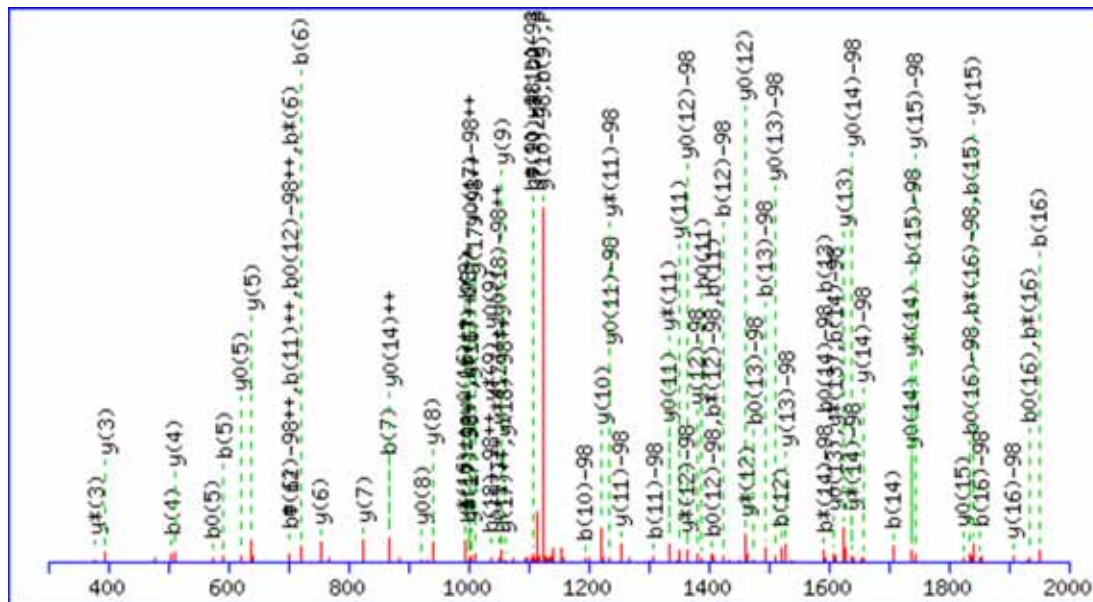

**Monoisotopic mass of neutral peptide Mr(calc):** 2344.9009

**Fixed modifications:** Carbamidomethyl (C) (apply to specified residues or termini only)

**Variable modifications:**

**N-term :** Dimethyl (N-term)

**S10 :** Phospho (ST), with neutral losses 97.9769(shown in table), 0.0000

**Ions Score:** 86 **Expect:** 6.8e-008

**Matched b ions:** b(4), b(5), b(6), b(7), b(8), b(9), b(10)-98, b(11), b(11)++, b(11)-98, b(12), b(12)-98, b(13)-98, b(13), b(14), b(14)-98, b(15), b(15)-98, b(16), b(16)-98, b(18)-98++

**Matched y ions:** y(3), y(4), y(5), y(6), y(7), y(8), y(9), y(10)-98, y(10), y(11)-98, y(11), y(12)-98, y(13)-98, y(13), y(14)-98, y(15), y(15)-98, y(16)-98, y(16)++, y(17)-98++, y(17)++, y(18)-98++

**Precursor origin neutral loss:** +

## Peptide No.1243

**VVDYSQFQESDDADEDYGR**

**Confirmed sites:** @S:10

**Ambiguous sites:**

MS/MS Fragmentation of **VVDYSQFQESDDADEDYGR**

Found in **NUCKS\_MOUSE**, Nuclear ubiquitous casein and cyclin-dependent kinases substrate OS=Mus musculus GN=Nucks1 PE=1 SV=1

Match to Query 6305: 2350.934368 from(1176.474460,2+)

Title: Elution from: 45.653 to 45.653 scan no 4181 cid35.00 polarity:+:MA10:m1s



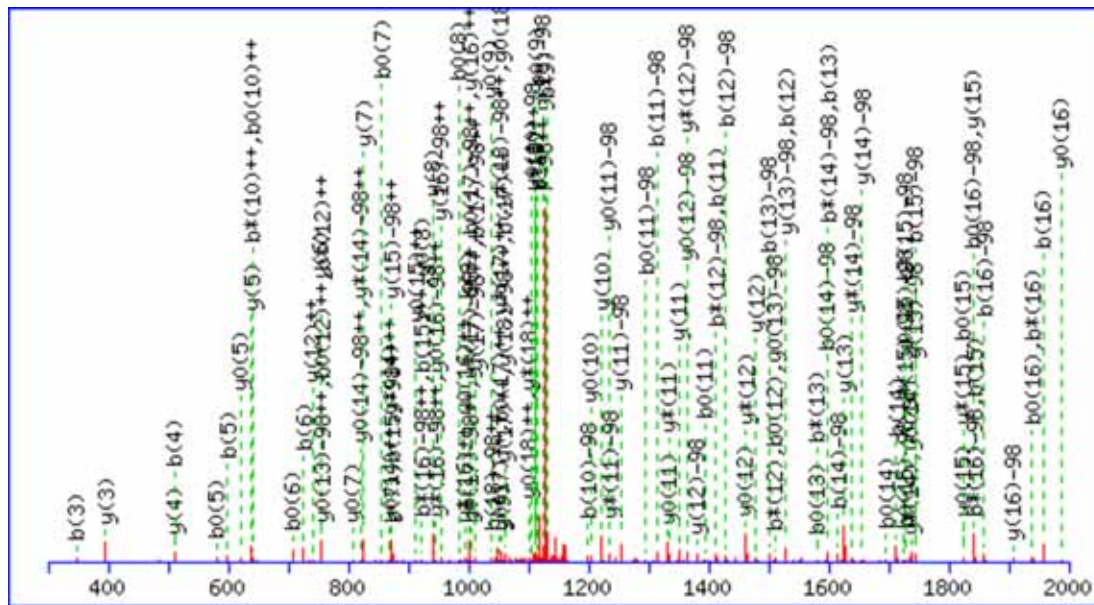

**Monoisotopic mass of neutral peptide Mr(calc):** 2350.9327

**Fixed modifications:** Carbamidomethyl (C) (apply to specified residues or termini only)

**Variable modifications:**

**N-term :** Dimethyl:2H(4)13C(2) (N-term)

**S10 :** Phospho (ST), with neutral losses 0.0000(shown in table), 97.9769

**Ions Score:** 86 **Expect:** 8.8e-008

**Matched b ions:** b(3), b(4), b(5), b(6), b(7), b(8), b(9), b(10)-98, b(11)-98, b(11), b(12), b(12)-98, b(13), b(13)-98, b(14), b(14)-98, b(15)-98++, b(15), b(15)-98, b(15)++, b(16)-98, b(16), b(17)-98++, b(17)++, b(18)-98++

**Matched y ions:** y(3), y(4), y(5), y(6), y(7), y(8), y(9), y(10), y(10)-98, y(11), y(11)-98, y(12)++, y(12)-98, y(12), y(13), y(13)-98, y(14)-98, y(15), y(15)-98, y(15)-98++, y(16)++, y(16)-98, y(16)-98++, y(17)-98++, y(17)++, y(18)-98++, y(18)++

**Precursor origin neutral loss:** +

## Peptide No.1244

**YAALSVDGEDEDEGDDCTE**

**Confirmed sites:** @S:5

**Ambiguous sites:**

MS/MS Fragmentation of **YAALSVDGEDEDEGDDCTE**

Found in **IF4B\_MOUSE**, Eukaryotic translation initiation factor 4B OS=Mus musculus GN=Eif4b PE=1 SV=1

Match to Query 5812: 2202.791034 from(1102.402793,2+)

Title: Elution from: 45.325 to 45.325 scan no 4139 cid35.00 polarity:+:MA10:m1s



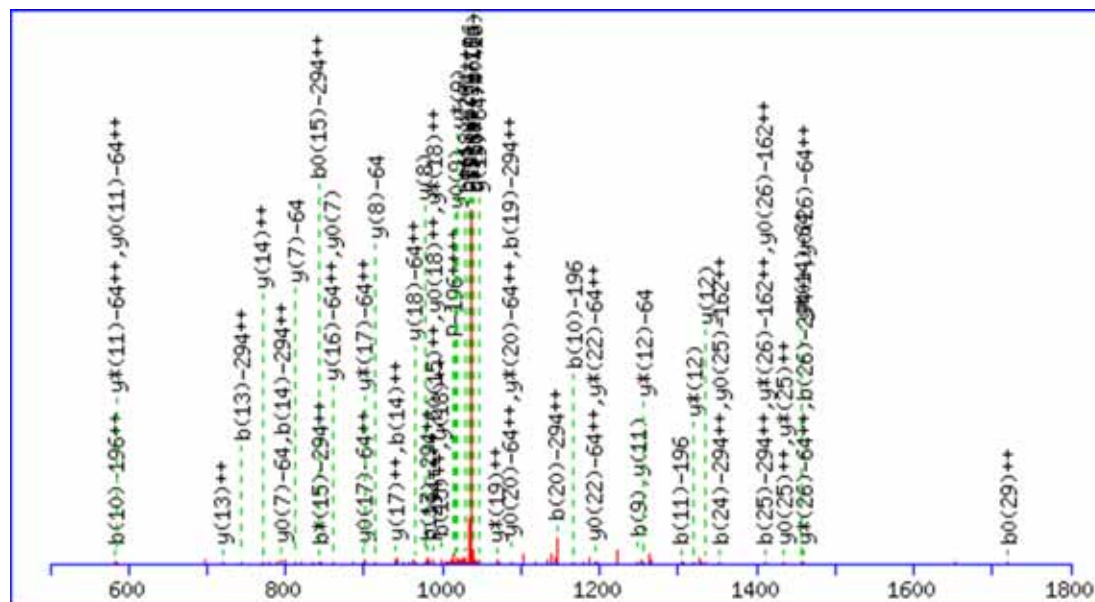

**Monoisotopic mass of neutral peptide Mr(calc):** 4246.7418

**Fixed modifications:** Carbamidomethyl (C) (apply to specified residues or termini only)

**Variable modifications:**

**N-term :** Dimethyl (N-term)

**Y1 :** Phospho (Y)

**S8 :** Phospho (ST), with neutral losses 97.9769(shown in table), 0.0000

**S9 :** Phospho (ST), with neutral losses 97.9769(shown in table), 0.0000

**S13 :** Phospho (ST), with neutral losses 97.9769(shown in table), 0.0000

**M33 :** Oxidation (M), with neutral losses 0.0000(shown in table), 63.9983

**K35 :** Dimethyl (K)

**Ions Score:** 33 **Expect:** 0.046

**Matched b ions:** b(9), b(10)-196++, b(10)-98, b(10)-196, b(11)-196, b(13)-294++, b(13)-98++, b(14)-294++, b(14)-196++, b(14)++, b(15)-196++, b(15)-98++, b(15)++, b(17)-294++, b(17)-196++, b(18)-294++, b(18)-196++, b(19)-294++, b(20)-294++, b(22)-196++, b(24)-294++, b(25)-294++, b(26)-294++

**Matched y ions:** y(8), y(9), y(11), y(12), y(13)++, y(14)++, y(17)++, y(18)++

**Precursor origin neutral loss:** +

## Peptide No.1246

**YDWEQKYYYGNLIAVSNSFLAYAIRAANNGSAMVR**

**Confirmed sites:** @Y:9,@S:16,@S:18,@Y:22

**Ambiguous sites:**

MS/MS Fragmentation of **YDWEQKYYYGNLIAVSNSFLAYAIRAANNGSAMVR**

Found in **EDC4\_MOUSE**, Enhancer of mRNA-decapping protein 4 OS=Mus musculus GN=Edc4 PE=1 SV=2

Match to Query 7010: 4421.932208 from(1106.490328,4+)

Title: Elution from: 55.069 to 55.069 scan no 5028 cid35.00 polarity:+:MA10:m1s

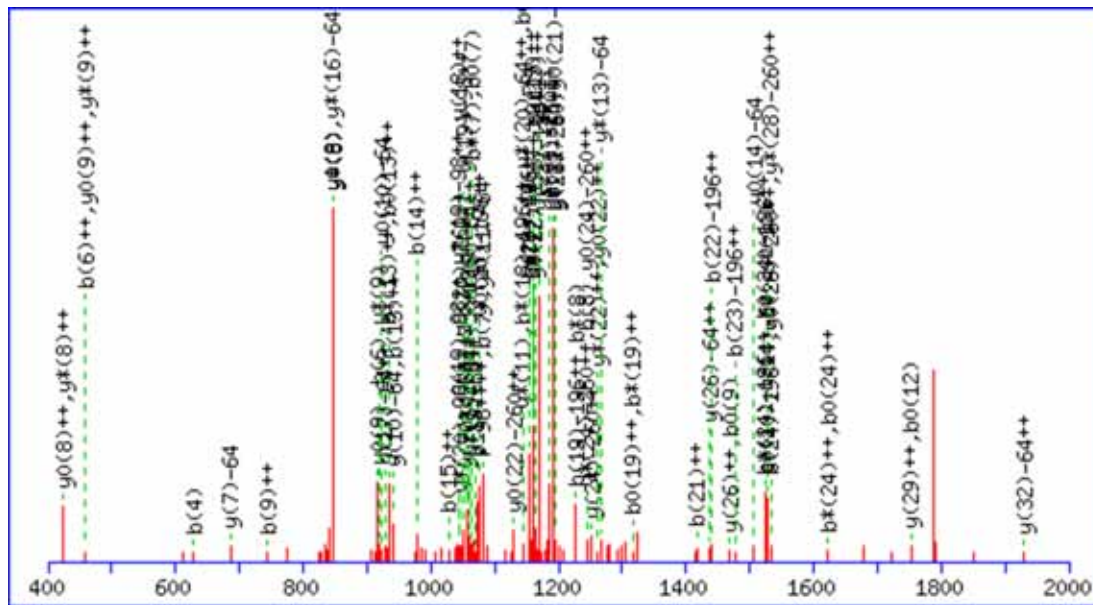

**Monoisotopic mass of neutral peptide Mr(calc):** 4421.9336

**Fixed modifications:** Carbamidomethyl (C) (apply to specified residues or termini only)

**Variable modifications:**

**N-term :** Dimethyl:2H(4)13C(2) (N-term)

**K6 :** Dimethyl:2H(4)13C(2) (K)

**Y9 :** Phospho (Y)

**S16 :** Phospho (ST), with neutral losses 97.9769(shown in table), 0.0000

**S18 :** Phospho (ST), with neutral losses 97.9769(shown in table), 0.0000

**Y22 :** Phospho (Y)

**M33 :** Oxidation (M), with neutral losses 63.9983(shown in table), 0.0000

**Ions Score:** 37 **Expect:** 0.024

**Matched b ions:** b(4), b(6)++, b(6), b(7), b(8), b(9)++, b(13)++, b(14)++, b(15)++, b(17)++, b(18)-196++, b(19)-196++, b(21)++, b(22)-196++, b(23)-98++, b(23)-196++, b(24)-196++, b(28)-98++

**Matched y ions:** y(11), y(18)++, y(19)-98++, y(22)-196++, y(23)-98++, y(26)++, y(28)-98++, y(29)++

**Precursor origin neutral loss:** +

## Peptide No.1247

**YFENWSASMI**

**Confirmed sites:** @Y:1

**Ambiguous sites:**

**MS/MS Fragmentation of YFENWSASMI**

Found in **COX2\_MOUSE**, Cytochrome c oxidase subunit 2 OS=Mus musculus GN=Mtco2 PE=1 SV=1

Match to Query 1734: 1376.557024 from(689.285788,2+)

Title: Elution from: 60.527 to 60.527 scan no 5780 cid35.00 polarity:+:MA10



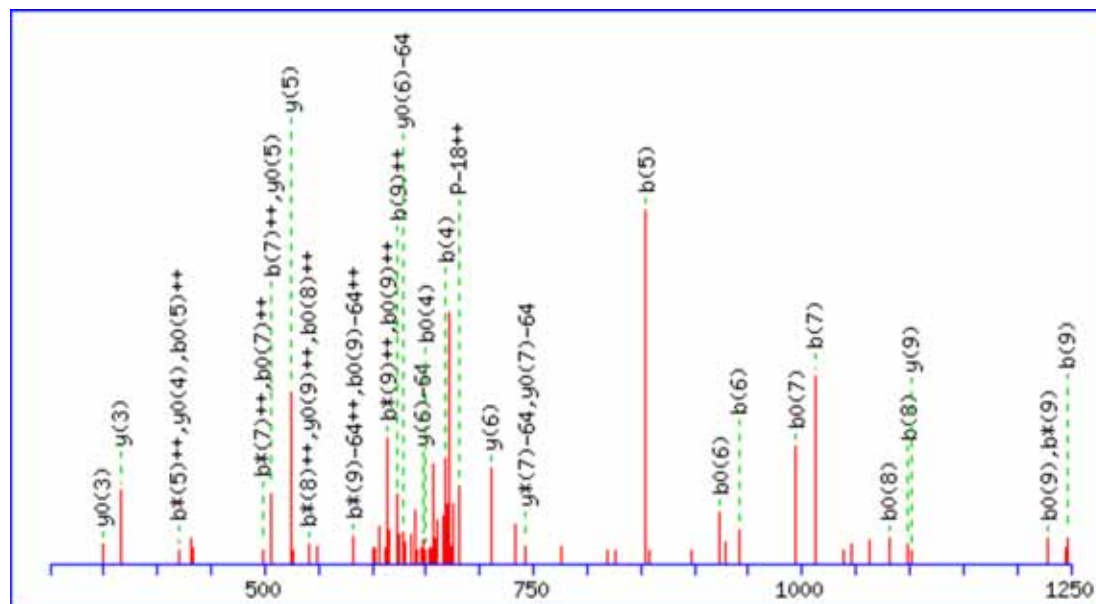

**Monoisotopic mass of neutral peptide Mr(calc):** 1376.5572

**Fixed modifications:** Carbamidomethyl (C) (apply to specified residues or termini only)

**Variable modifications:**

**N-term :** Dimethyl:2H(4)13C(2) (N-term)

**Y1 :** Phospho (Y)

**M9 :** Oxidation (M), with neutral losses 0.0000(shown in table), 63.9983

**Ions Score:** 36 **Expect:** 0.0034

**Matched b ions:** b(4), b(5), b(6), b(7), b(7)++, b(8), b(9)++, b(9)

**Matched y ions:** y(3), y(5), y(6), y(9)

**Precursor origin neutral loss:**

## Peptide No.1248

**YGGKTYRAVVK**

**Confirmed sites:** @Y:1

**Ambiguous sites:**

**MS/MS Fragmentation of YGGKTYRAVVK**

Found in **SMBT2\_MOUSE**, Scm-like with four MBT domains protein 2 OS=Mus musculus GN=Sfmbt2  
PE=2 SV=2

Match to Query 1190: 1354.719414 from(452.580414,3+)

Title: Elution from: 30.442 to 30.442 scan no 2070 cid35.00 polarity:+:MA10

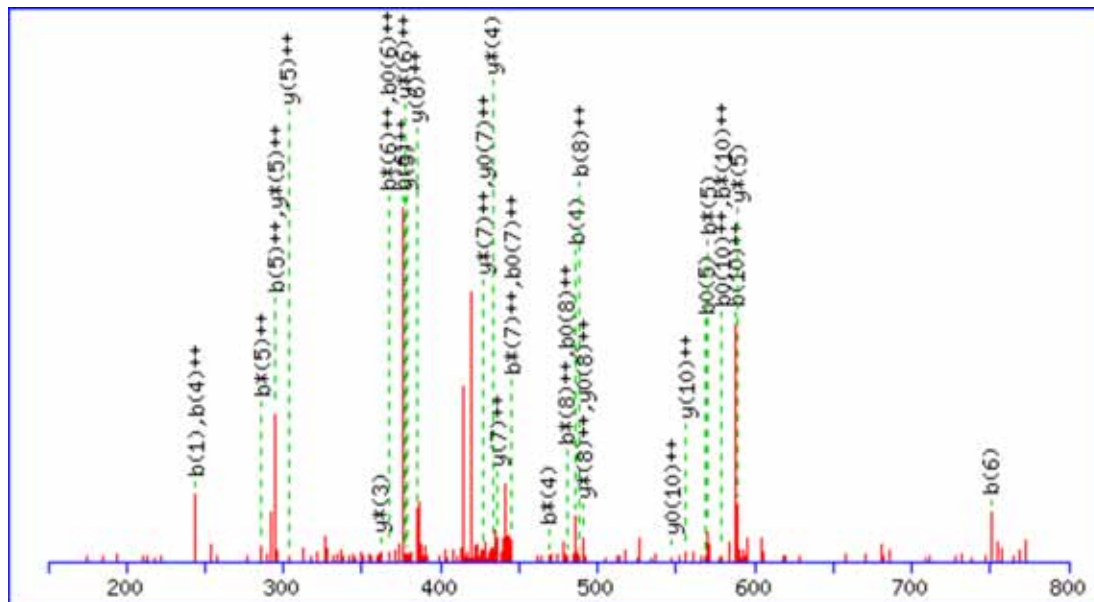

**Monoisotopic mass of neutral peptide Mr(calc):** 1354.7222

**Fixed modifications:** Carbamidomethyl (C) (apply to specified residues or termini only)

**Variable modifications:**

Y1 : Phospho (Y)

K11 : Dimethyl:2H(4)13C(2) (K)

**Ions Score:** 34 **Expect:** 0.014

**Matched b ions:** b(1), b(4)++, b(4), b(5)++, b(6)++, b(6), b(8)++, b(10)++

**Matched y ions:** y(3), y(5)++, y(6)++, y(7)++, y(10)++

**Precursor origin neutral loss:** +

## Peptide No.1249

**YGMGTSVER**

**Confirmed sites:** @S:6

**Ambiguous sites:**

MS/MS Fragmentation of **YGMGTSVER**

Found in **ODPA\_MOUSE**, Pyruvate dehydrogenase E1 component subunit alpha, somatic form, mitochondrial OS=Mus musculus GN=Pdha1 PE=1 SV=1

Match to Query 883: 1122.441714 from(562.228133,2+)

Title: Elution from: 22.832 to 22.832 scan no 1342 cid35.00 polarity:+:MA10

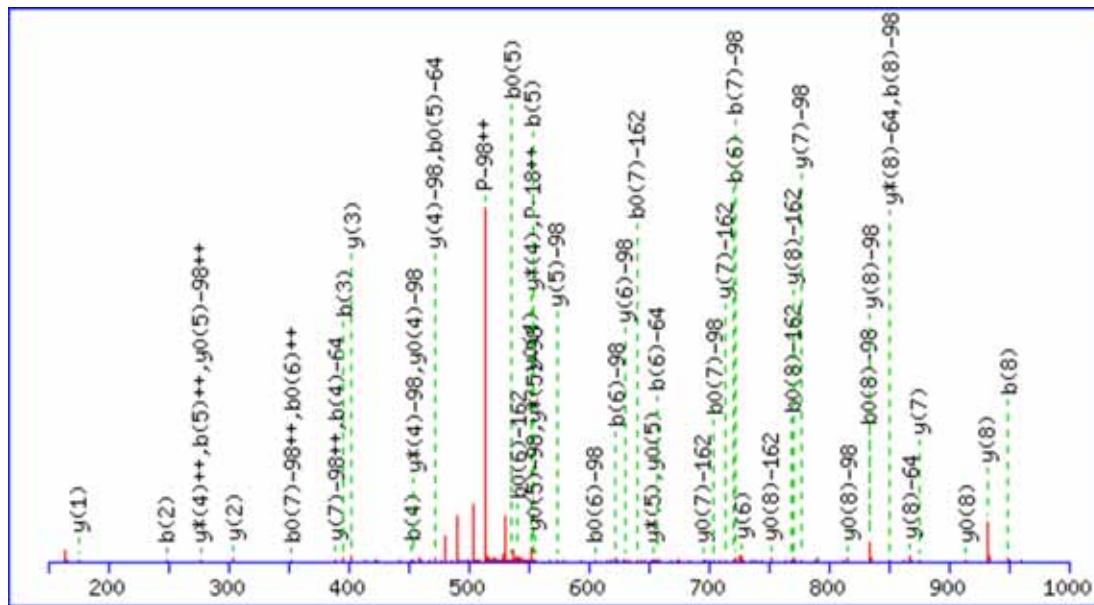

**Monoisotopic mass of neutral peptide Mr(calc):** 1122.4417

**Fixed modifications:** Carbamidomethyl (C) (apply to specified residues or termini only)

**Variable modifications:**

**N-term :** Dimethyl (N-term)

**M3 :** Oxidation (M), with neutral losses 0.0000(shown in table), 63.9983

**S6 :** Phospho (ST), with neutral losses 97.9769(shown in table), 0.0000

**Ions Score:** 27 **Expect:** 0.017

**Matched b ions:** b(2), b(3), b(4), b(5)++, b(5), b(6)-98, b(6), b(7)-98, b(8), b(8)-98

**Matched y ions:** y(1), y(2), y(3), y(4)-98, y(5)-98, y(6), y(6)-98, y(7)-98++, y(7), y(7)-98, y(8)-98, y(8)

**Precursor origin neutral loss:** +

## Peptide No.1250

**YHGHSMSDPGVS<sup>R</sup>**

**Confirmed sites:** @Y:1,@S:12

**Ambiguous sites:**

**MS/MS Fragmentation of YHGHSMSDPGVS<sup>R</sup>**

Found in **ODPA\_MOUSE**, Pyruvate dehydrogenase E1 component subunit alpha, somatic form, mitochondrial OS=Mus musculus GN=Pdha1 PE=1 SV=1

Match to Query 3326: 1795.643397 from(599.555075,3+)

Title: Elution from: 24.902 to 24.902 scan no 1454 cid35.00 polarity:+:MA10

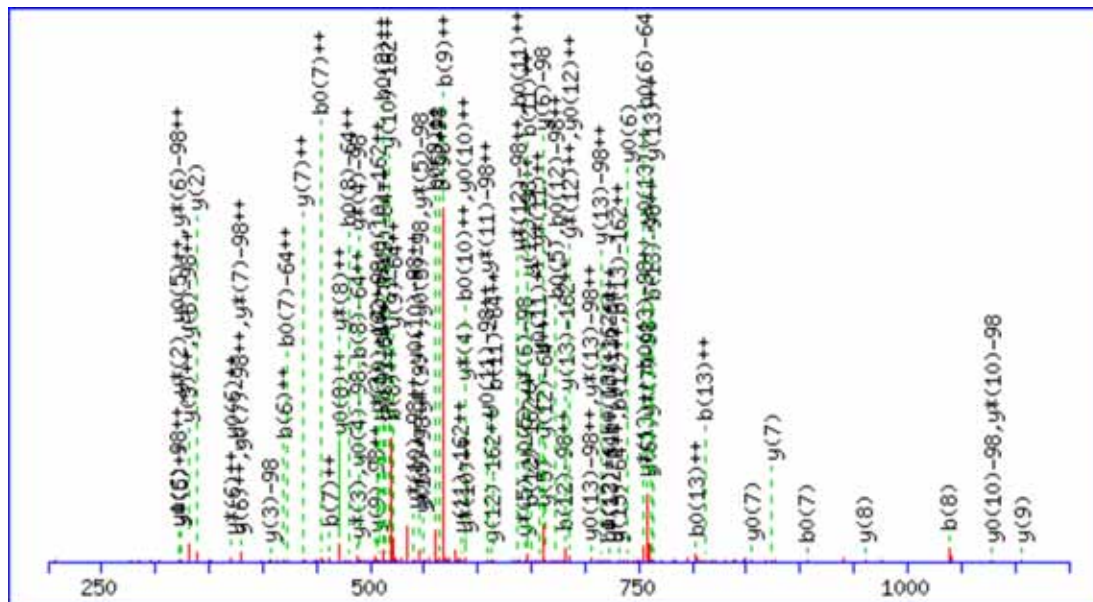

**Monoisotopic mass of neutral peptide Mr(calc):** 1795.6426

**Fixed modifications:** Carbamidomethyl (C) (apply to specified residues or termini only)

**Variable modifications:**

**N-term :** Dimethyl (N-term)

**Y1 :** Phospho (Y)

**M6 :** Oxidation (M), with neutral losses 0.0000(shown in table), 63.9983

**S12 :** Phospho (ST), with neutral losses 0.0000(shown in table), 97.9769

**Ions Score:** 26 **Expect:** 0.032

**Matched b ions:** b(6)++, b(7)++, b(8), b(8)++, b(9)++, b(11)++, b(12)-98++, b(12)++, b(13)++, b(13)-98++

**Matched y ions:** y(2), y(3), y(3)-98, y(4)-98, y(5)++, y(5), y(5)-98, y(6)-98++, y(6)-98, y(6), y(6)++, y(7), y(7)++, y(8), y(9), y(9)-98++, y(10)-98++, y(12)-98++, y(13)-98++, y(13)++

**Precursor origin neutral loss:** +

## Peptide No.1251

**YHGHSMSDPGVSYR**

**Confirmed sites:** @S:5

**Ambiguous sites:**

**MS/MS Fragmentation of** **YHGHSMSDPGVSYR**

Found in **ODPA\_MOUSE**, Pyruvate dehydrogenase E1 component subunit alpha, somatic form, mitochondrial OS=Mus musculus GN=Pdha1 PE=1 SV=1

Match to Query 3823: 1715.676414 from(858.845483,2+)

Title: Elution from: 22.970 to 22.970 scan no 1360 cid35.00 polarity:+:MA10



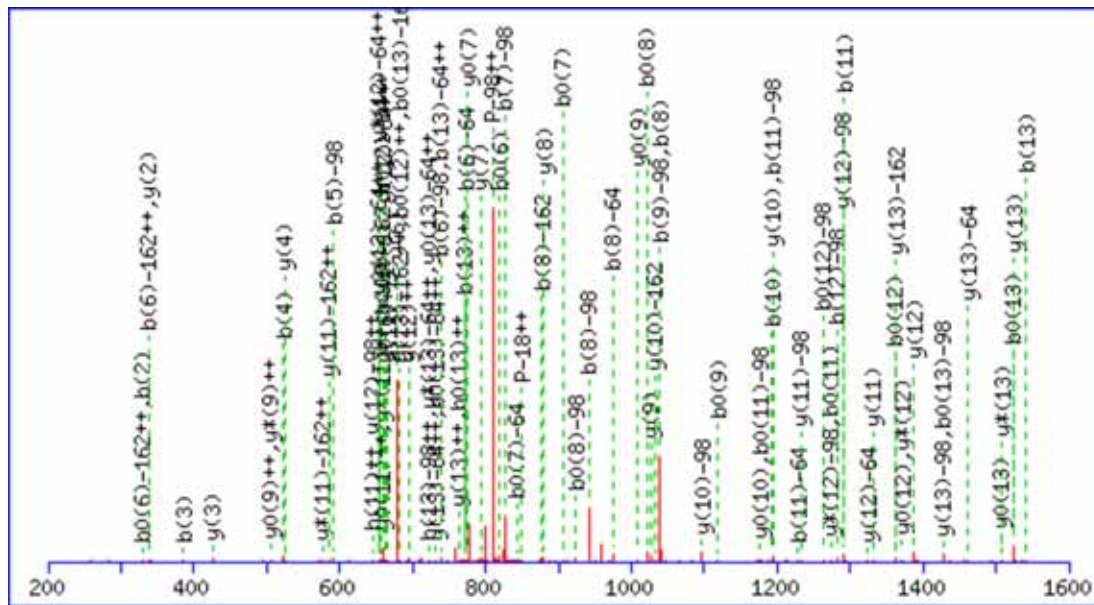

**Monoisotopic mass of neutral peptide Mr(calc):** 1715.6763

**Fixed modifications:** Carbamidomethyl (C) (apply to specified residues or termini only)

**Variable modifications:**

**N-term :** Dimethyl (N-term)

**S5 :** Phospho (ST), with neutral losses 97.9769(shown in table), 0.0000

**M6 :** Oxidation (M), with neutral losses 0.0000(shown in table), 63.9983

**Ions Score:** 54 **Expect:** 8.1e-005

**Matched b ions:** b(2), b(3), b(4), b(5)-98, b(6)-98, b(7)-98, b(8)-98, b(8), b(9)-98, b(10), b(11)-98, b(11)++, b(11), b(12)-98, b(13), b(13)-98++, b(13)++

**Matched y ions:** y(2), y(3), y(4), y(6), y(7), y(8), y(9), y(10)-98, y(10), y(11), y(11)-98, y(11)++, y(12)-98, y(12), y(12)-98++, y(12)++, y(13), y(13)-98, y(13)++

**Precursor origin neutral loss:** +

## Peptide No.1252

**YHGHSMSDPGVSYR**

**Confirmed sites:** @S:5,@S:12

**Ambiguous sites:**

**MS/MS Fragmentation of YHGHSMSDPGVSYR**

Found in **ODPA\_MOUSE**, Pyruvate dehydrogenase E1 component subunit alpha, somatic form, mitochondrial OS=Mus musculus GN=Pdha1 PE=1 SV=1

Match to Query 4277: 1795.643350 from(898.828951,2+)

Title: Elution from: 24.854 to 24.854 scan no 1611 cid35.00 polarity:+:MA10

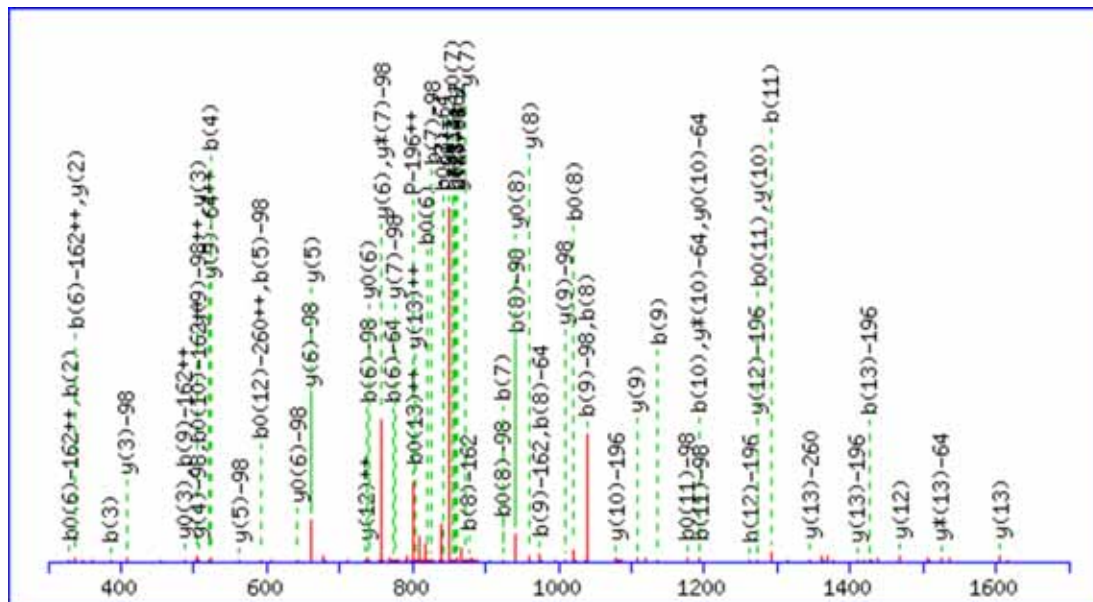

**Monoisotopic mass of neutral peptide Mr(calc):** 1795.6426

**Fixed modifications:** Carbamidomethyl (C) (apply to specified residues or termini only)

**Variable modifications:**

**N-term :** Dimethyl (N-term)

**S5 :** Phospho (ST), with neutral losses 97.9769(shown in table), 0.0000

**M6 :** Oxidation (M), with neutral losses 0.0000(shown in table), 63.9983

**S12 :** Phospho (ST), with neutral losses 97.9769(shown in table), 0.0000

**Ions Score:** 39 **Expect:** 0.0015

**Matched b ions:** b(2), b(3), b(4), b(5)-98, b(6)-98, b(7)-98, b(7), b(8)-98, b(8), b(9)-98, b(9), b(10), b(11), b(11)-98, b(12)-98, b(12)-196, b(13)-98, b(13)-196

**Matched y ions:** y(2), y(3), y(3)-98, y(4)-98, y(5)-98, y(5), y(6)-98, y(6), y(7)-98, y(7), y(8), y(8)-98, y(9)-98++, y(9), y(9)-98, y(10)-98, y(10), y(10)-196, y(11)-98, y(12), y(12)-98, y(12)-196, y(12)++, y(13), y(13)-98, y(13)-196, y(13)-98++, y(13)++

**Precursor origin neutral loss:** +

## Peptide No.1253

**YHGHSMSDPGVSYR**

**Confirmed sites:**

**Ambiguous sites:** @S:5orS:7

MS/MS Fragmentation of **YHGHSMSDPGVSYR**

Found in **ODPA\_MOUSE**, Pyruvate dehydrogenase E1 component subunit alpha, somatic form, mitochondrial OS=Mus musculus GN=Pdha1 PE=1 SV=1

Match to Query 3278: 1715.677648 from(858.846100,2+)

Title: Elution from: 23.029 to 23.029 scan no 1255 cid35.00 polarity:+:MA10



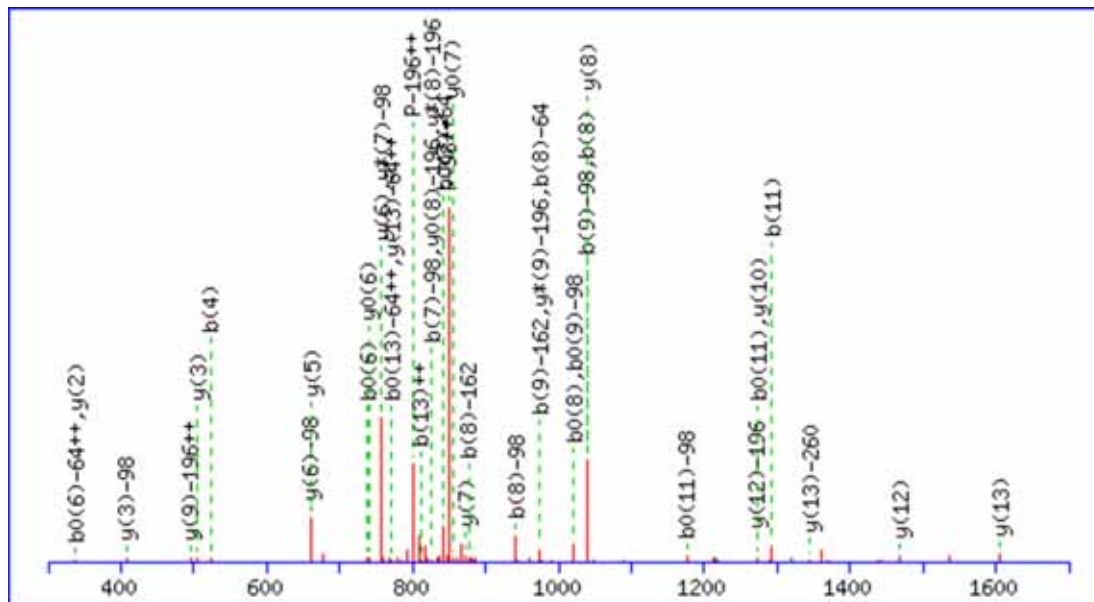

**Monoisotopic mass of neutral peptide Mr(calc):** 1795.6426

**Fixed modifications:** Carbamidomethyl (C) (apply to specified residues or termini only)

**Variable modifications:**

**N-term :** Dimethyl (N-term)

**M6 :** Oxidation (M), with neutral losses 0.0000(shown in table), 63.9983

**S7 :** Phospho (ST), with neutral losses 0.0000(shown in table), 97.9769

**S12 :** Phospho (ST), with neutral losses 0.0000(shown in table), 97.9769

**Ions Score:** 32 **Expect:** 0.0084

**Matched b ions:** b(4), b(7)-98, b(8)-98, b(8), b(9)-98, b(11), b(12)-98, b(13)++

**Matched y ions:** y(2), y(3)-98, y(3), y(5), y(6)-98, y(6), y(7), y(8), y(8)-98, y(9)-196++, y(9)-98, y(10)-98, y(10), y(12), y(12)-196, y(12)-98, y(13)

**Precursor origin neutral loss:** +

## Peptide No.1255

**YHGHSMSDPGVSYR**

**Confirmed sites:** @S:7

**Ambiguous sites:** @S:12orY:13

**MS/MS Fragmentation of YHGHSMSDPGVSYR**

Found in **ODPA\_MOUSE**, Pyruvate dehydrogenase E1 component subunit alpha, somatic form, mitochondrial OS=Mus musculus GN=Pdha1 PE=1 SV=1

Match to Query 3562: 1795.642938 from(599.554922,3+)

Title: Elution from: 24.841 to 24.841 scan no 1447 cid35.00 polarity:+:MA10



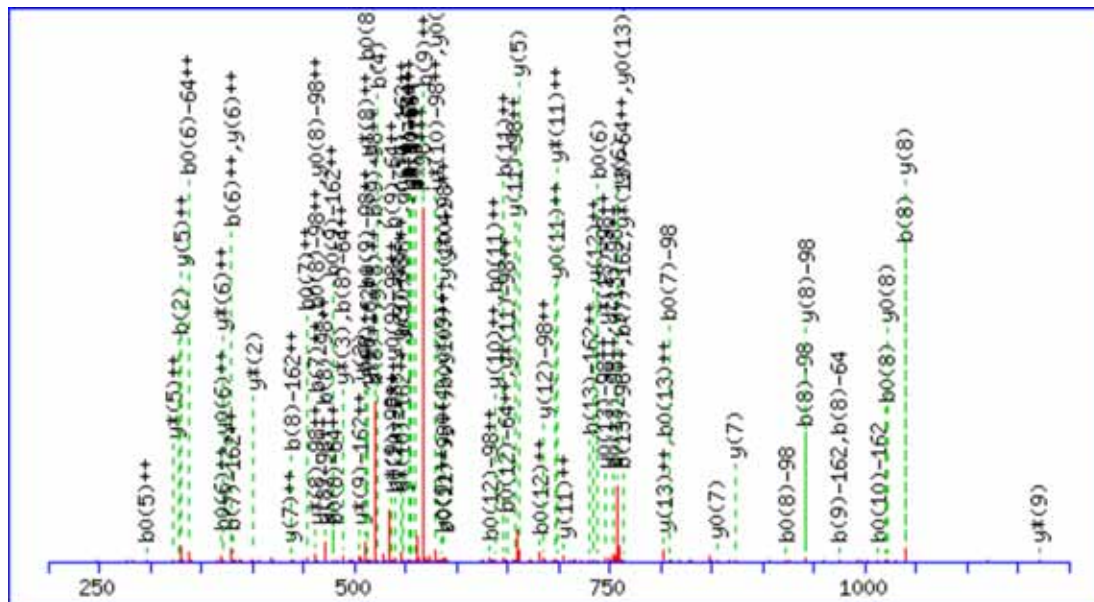

**Monoisotopic mass of neutral peptide Mr(calc):** 1795.6426

**Fixed modifications:** Carbamidomethyl (C) (apply to specified residues or termini only)

**Variable modifications:**

**N-term :** Dimethyl (N-term)

**M6 :** Oxidation (M), with neutral losses 0.0000(shown in table), 63.9983

**S7 :** Phospho (ST), with neutral losses 97.9769(shown in table), 0.0000

**Y13 :** Phospho (Y)

**Ions Score:** 23 **Expect:** 0.06

**Matched b ions:** b(2), b(4), b(6)++, b(7)++, b(8)++, b(8)-98, b(8), b(8)-98++, b(9)-98++, b(9)++, b(10)-98++, b(11)++, b(13)-98++

**Matched y ions:** y(3), y(5)++, y(5), y(6)++, y(6), y(7), y(7)++, y(8)++, y(8), y(8)-98, y(8)-98++, y(9)-98++, y(10)-98++, y(10)++, y(11)++, y(11)-98++, y(12)-98++, y(12)++, y(13)++, y(13)-98++

**Precursor origin neutral loss:** +

## Peptide No.1256

**YHGHSMSDPGVSYR**

**Confirmed sites:** @Y:1,@S:12

**Ambiguous sites:**

**MS/MS Fragmentation of** **YHGHSMSDPGVSYR**

Found in **ODPA\_MOUSE**, Pyruvate dehydrogenase E1 component subunit alpha, somatic form, mitochondrial OS=Mus musculus GN=Pdha1 PE=1 SV=1

Match to Query 4186: 1779.648303 from(594.223377,3+)

Title: Elution from: 29.681 to 29.681 scan no 2261 cid35.00 polarity:+:MA10

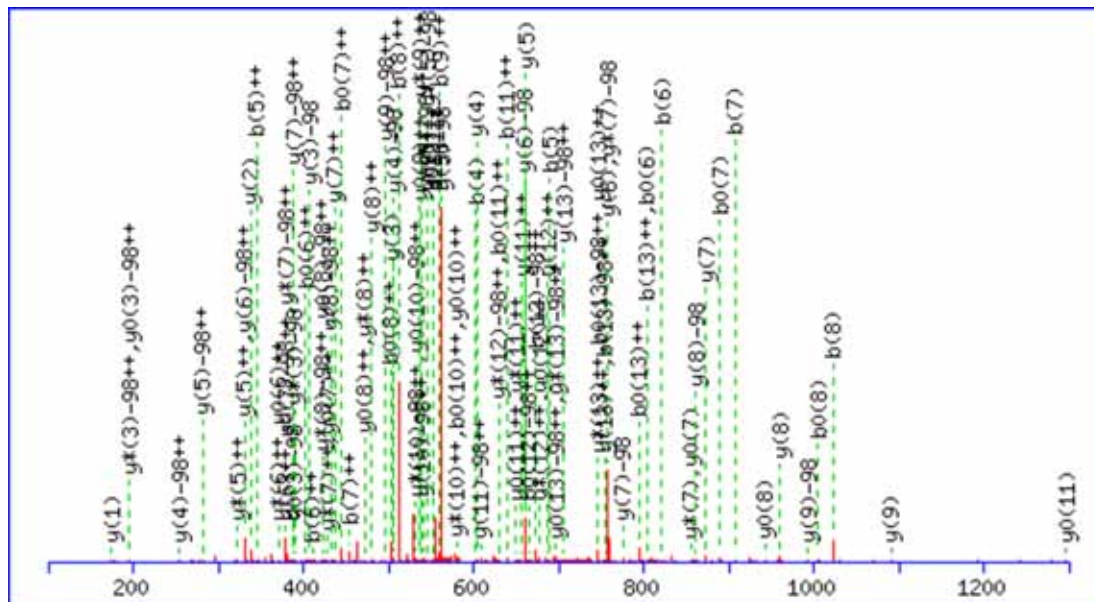

**Monoisotopic mass of neutral peptide Mr(calc): 1779.6477**

**Fixed modifications:** Carbamidomethyl (C) (apply to specified residues or termini only)

**Variable modifications:**

**N-term :** Dimethyl (N-term)

**Y1 :** Phospho (Y)

**S12 :** Phospho (ST), with neutral losses 97.9769(shown in table), 0.0000

**Ions Score:** 25 **Expect:** 0.047

**Matched b ions:** b(4), b(5)++, b(5), b(6)++, b(6), b(7)++, b(7), b(8), b(8)++, b(9)++, b(11)++, b(12)-98, b(13)-98, b(13)++

**Matched y ions:** y(1), y(2), y(3)-98, y(3), y(4)-98, y(4)-98, y(4), y(5)++, y(5), y(5)-98, y(5)-98, y(6)-98, y(6)++, y(6)-98, y(6), y(7), y(7)-98, y(7)++, y(7)-98, y(8), y(8)-98, y(8)-98, y(8)++, y(8)++, y(9), y(9)-98, y(9)-98, y(9)++, y(10)-98, y(11)-98, y(11)++, y(12)++, y(13)-98, y(13)++

**Precursor origin neutral loss:** +

## Peptide No.1257

**YHGHSMSDPGVSYR**

**Confirmed sites:** @S:5

**Ambiguous sites:**

**MS/MS Fragmentation of YHGHSMSDPGVSYR**

Found in **ODPA\_MOUSE**, Pyruvate dehydrogenase E1 component subunit alpha, somatic form, mitochondrial OS=Mus musculus GN=Pdha1 PE=1 SV=1

Match to Query 3719: 1699.681347 from(567.567725,3+)

Title: Elution from: 27.344 to 27.344 scan no 1940 cid35.00 polarity:+:MA10



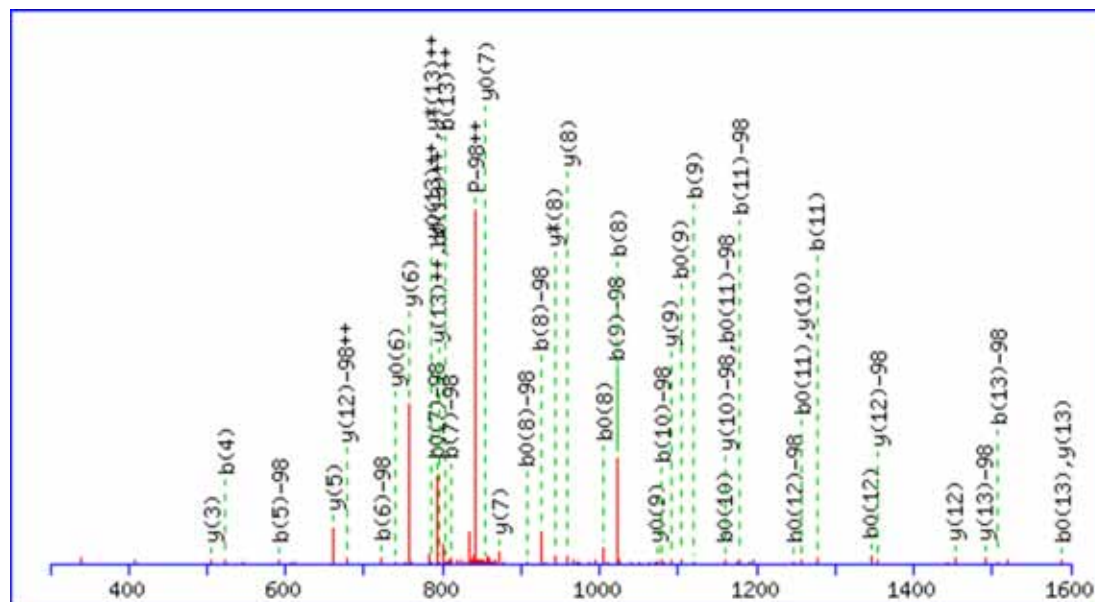

**Monoisotopic mass of neutral peptide Mr(calc): 1779.6477**

**Fixed modifications:** Carbamidomethyl (C) (apply to specified residues or termini only)

**Variable modifications:**

**N-term :** Dimethyl (N-term)

**S5 :** Phospho (ST), with neutral losses 97.9769(shown in table), 0.0000

**Y13 :** Phospho (Y)

**Ions Score:** 55 **Expect:** 4.4e-005

**Matched b ions:** b(4), b(5)-98, b(6)-98, b(7)-98, b(8), b(8)-98, b(9)-98, b(9), b(10)-98, b(11), b(11)-98, b(13)-98, b(13)++

**Matched y ions:** y(3), y(5), y(6), y(7), y(8), y(9), y(10)-98, y(10), y(12)-98++, y(12)-98, y(12), y(13)-98, y(13), y(13)++

**Precursor origin neutral loss:** +

## Peptide No.1259

**YHGHSMSDPGVSYR**

**Confirmed sites:** @S:12

**Ambiguous sites:** @Y:1orS:5

MS/MS Fragmentation of **YHGHSMSDPGVSYR**

Found in **ODPA\_MOUSE**, Pyruvate dehydrogenase E1 component subunit alpha, somatic form, mitochondrial OS=Mus musculus GN=Pdha1 PE=1 SV=1

Match to Query 3015: 1801.675642 from(901.845097,2+)

Title: Elution from: 24.681 to 24.681 scan no 1398 cid35.00 polarity:+:MA10



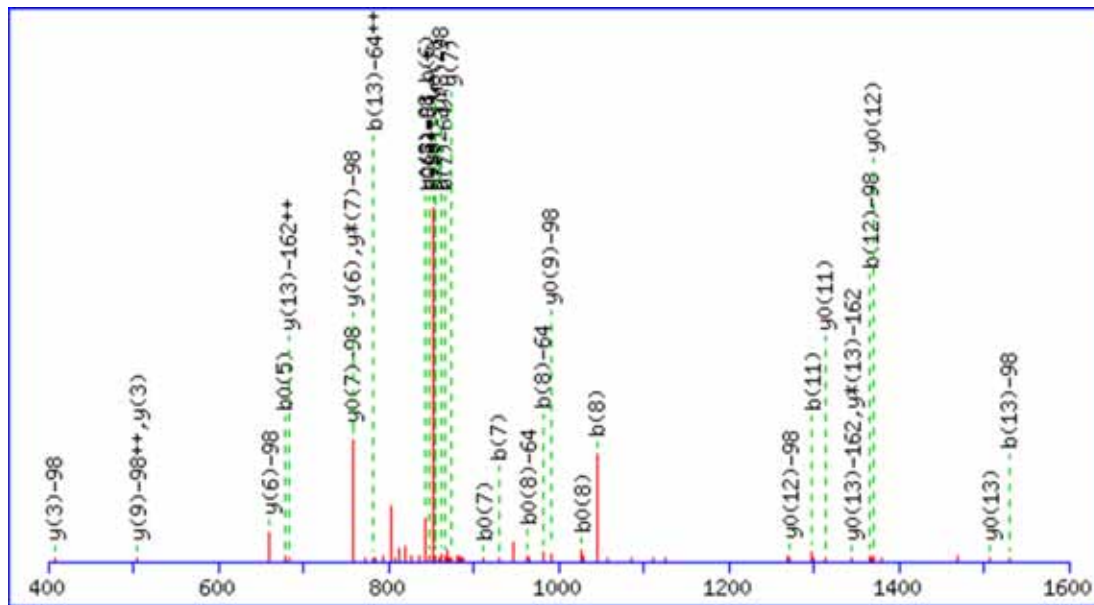

**Monoisotopic mass of neutral peptide Mr(calc):** 1801.6745

**Fixed modifications:** Carbamidomethyl (C) (apply to specified residues or termini only)

**Variable modifications:**

**N-term :** Dimethyl:2H(4)13C(2) (N-term)

**Y1 :** Phospho (Y)

**M6 :** Oxidation (M), with neutral losses 0.0000(shown in table), 63.9983

**S12 :** Phospho (ST), with neutral losses 97.9769(shown in table), 0.0000

**Ions Score:** 26 **Expect:** 0.032

**Matched b ions:** b(6), b(7), b(8), b(11), b(12)-98, b(13)-98

**Matched y ions:** y(3), y(3)-98, y(6)-98, y(6), y(7), y(8)-98, y(9)-98++

**Precursor origin neutral loss:** +

## Peptide No.1260

**YHGHSMSDPGVSUR**

**Confirmed sites:** @S:5

**Ambiguous sites:**

MS/MS Fragmentation of **YHGHSMSDPGVSUR**

Found in **ODPA\_MOUSE**, Pyruvate dehydrogenase E1 component subunit alpha, somatic form, mitochondrial OS=Mus musculus GN=Pdha1 PE=1 SV=1

Match to Query 2858: 1721.709732 from(574.910520,3+)

Title: Elution from: 22.930 to 22.930 scan no 1241 cid35.00 polarity:+:MA10



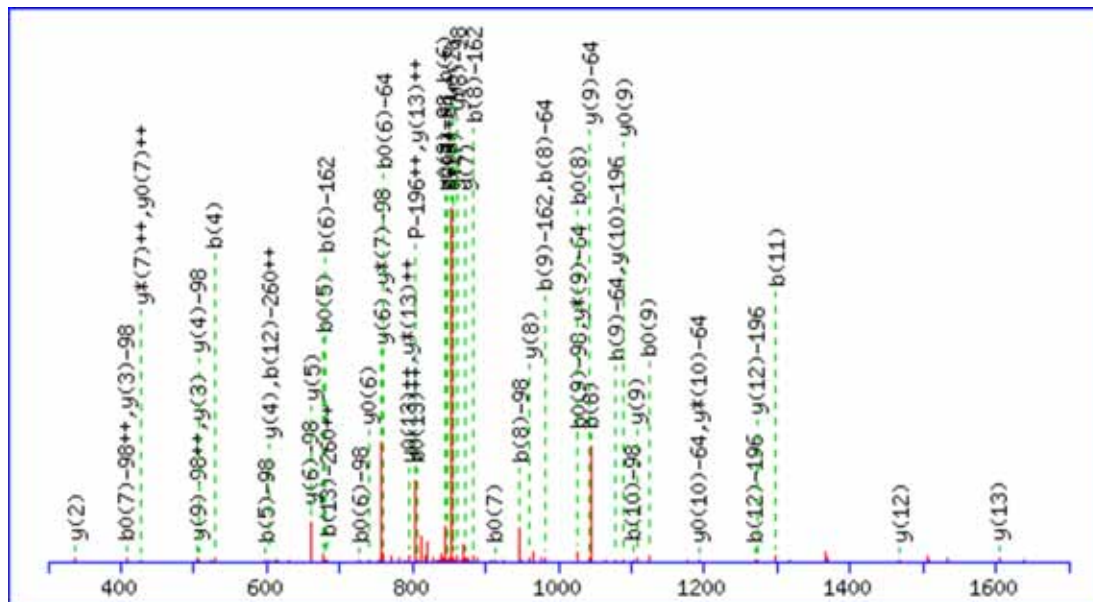

**Monoisotopic mass of neutral peptide Mr(calc):** 1801.6745

**Fixed modifications:** Carbamidomethyl (C) (apply to specified residues or termini only)

**Variable modifications:**

**N-term :** Dimethyl:2H(4)13C(2) (N-term)

**S5 :** Phospho (ST), with neutral losses 0.0000(shown in table), 97.9769

**M6 :** Oxidation (M), with neutral losses 0.0000(shown in table), 63.9983

**S12 :** Phospho (ST), with neutral losses 0.0000(shown in table), 97.9769

**Ions Score:** 44 **Expect:** 0.00055

**Matched b ions:** b(4), b(5)-98, b(6), b(8)-98, b(8), b(10)-98, b(11), b(12)-98, b(12)-196, b(12)-98++

**Matched y ions:** y(2), y(3), y(3)-98, y(4), y(4)-98, y(5), y(6)-98, y(6), y(7), y(8), y(8)-98, y(9)-98++, y(9), y(10)-98, y(10)-196, y(12)-98, y(12)-196, y(12), y(13)-98, y(13), y(13)++, y(13)-98++

**Precursor origin neutral loss:** +

## Peptide No.1262

**YHGHSMSDPGVSYR**

**Confirmed sites:** @S:5

**Ambiguous sites:** @S:12orY:13

**MS/MS Fragmentation of** **YHGHSMSDPGVSYR**

Found in **ODPA\_MOUSE**, Pyruvate dehydrogenase E1 component subunit alpha, somatic form, mitochondrial OS=Mus musculus GN=Pdha1 PE=1 SV=1

Match to Query 3631: 1801.675254 from(901.844903,2+)

Title: Elution from: 24.769 to 24.769 scan no 1438 cid35.00 polarity:+:MA10

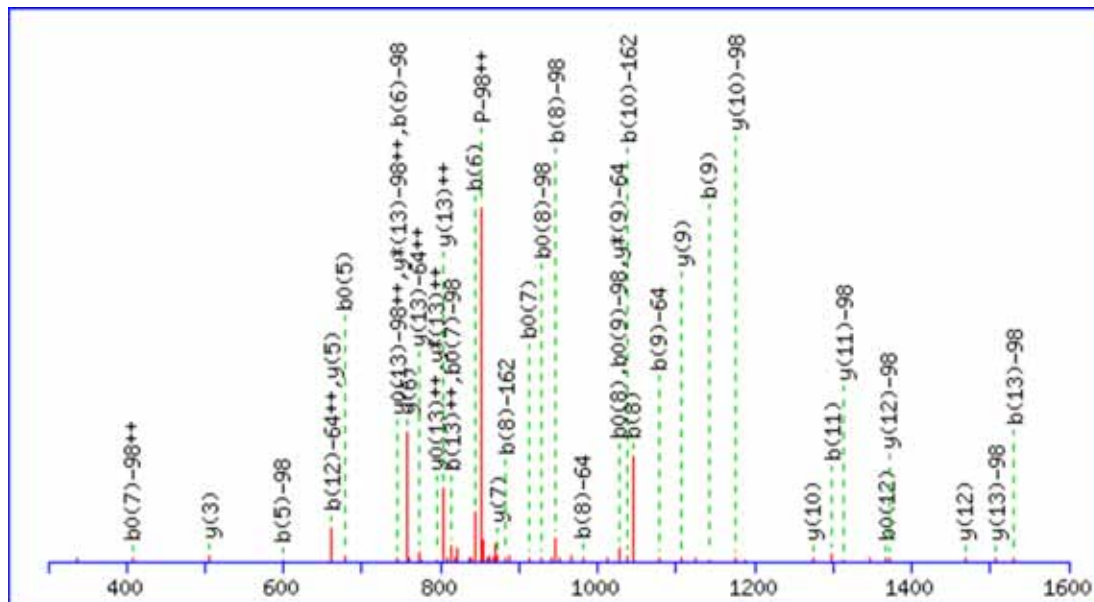

**Monoisotopic mass of neutral peptide Mr(calc):** 1801.6745

**Fixed modifications:** Carbamidomethyl (C) (apply to specified residues or termini only)

**Variable modifications:**

**N-term :** Dimethyl:2H(4)13C(2) (N-term)

**S5 :** Phospho (ST), with neutral losses 97.9769(shown in table), 0.0000

**M6 :** Oxidation (M), with neutral losses 0.0000(shown in table), 63.9983

**Y13 :** Phospho (Y)

**Ions Score:** 40 **Expect:** 0.0015

**Matched b ions:** b(5)-98, b(6), b(6)-98, b(8)-98, b(8), b(9), b(11), b(13)-98, b(13)++

**Matched y ions:** y(3), y(5), y(6), y(7), y(9), y(10)-98, y(10), y(11)-98, y(12)-98, y(12), y(13)++, y(13)-98

**Precursor origin neutral loss:** +

## Peptide No.1263

**YHGHSMSDPGVSYR**

**Confirmed sites:** @S:7,@S:12

**Ambiguous sites:**

MS/MS Fragmentation of **YHGHSMSDPGVSYR**

Found in **ODPA\_MOUSE**, Pyruvate dehydrogenase E1 component subunit alpha, somatic form, mitochondrial OS=Mus musculus GN=Pdha1 PE=1 SV=1

Match to Query 3747: 1801.675896 from(901.845224,2+)

Title: Elution from: 24.849 to 24.849 scan no 1474 cid35.00 polarity:+:MA10



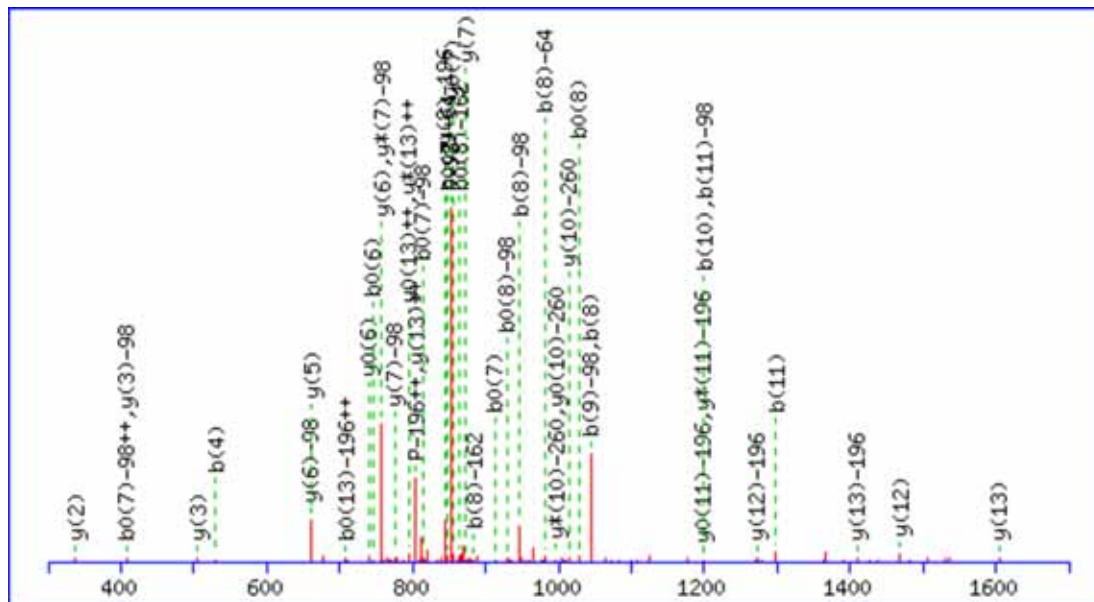

**Monoisotopic mass of neutral peptide Mr(calc):** 1801.6745

**Fixed modifications:** Carbamidomethyl (C) (apply to specified residues or termini only)

**Variable modifications:**

**N-term :** Dimethyl:2H(4)13C(2) (N-term)

**M6 :** Oxidation (M), with neutral losses 0.0000(shown in table), 63.9983

**S7 :** Phospho (ST), with neutral losses 97.9769(shown in table), 0.0000

**S12 :** Phospho (ST), with neutral losses 97.9769(shown in table), 0.0000

**Ions Score:** 34 **Expect:** 0.0053

**Matched b ions:** b(4), b(8)-98, b(8), b(9)-98, b(10), b(11), b(11)-98, b(12)-98, b(13)-98, b(13)-98++

**Matched y ions:** y(2), y(3)-98, y(3), y(5), y(6)-98, y(6), y(7)-98, y(7), y(8)-196, y(10)-98, y(12), y(12)-196, y(13), y(13)++, y(13)-196, y(13)-98

**Precursor origin neutral loss:** +

## Peptide No.1264

**YHGHSMSDPGVSUR**

**Confirmed sites:** @S:5

**Ambiguous sites:**

MS/MS Fragmentation of **YHGHSMSDPGVSUR**

Found in **ODPA\_MOUSE**, Pyruvate dehydrogenase E1 component subunit alpha, somatic form, mitochondrial OS=Mus musculus GN=Pdha1 PE=1 SV=1

Match to Query 4413: 1705.713660 from(569.578496,3+)

Title: Elution from: 27.202 to 27.202 scan no 1833 cid35.00 polarity:+:MA10

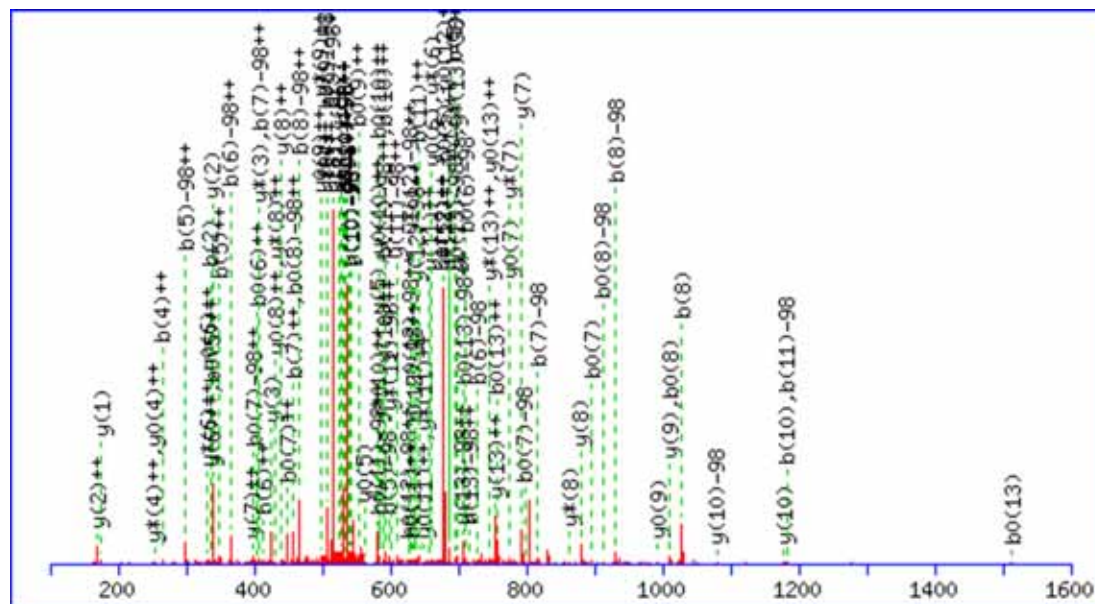

**Monoisotopic mass of neutral peptide Mr(calc):** 1705.7132

**Fixed modifications:** Carbamidomethyl (C) (apply to specified residues or termini only)

**Variable modifications:**

**N-term :** Dimethyl:2H(4)13C(2) (N-term)

**S5 :** Phospho (ST), with neutral losses 97.9769(shown in table), 0.0000

**Ions Score:** 42 **Expect:** 0.0018

**Matched b ions:** b(2), b(4)++, b(4), b(5)-98++, b(5)++, b(5)-98, b(5), b(6)-98++, b(6)++, b(6)-98, b(7)++, b(7)-98++, b(7)-98, b(8)++, b(8), b(8)-98, b(8)-98++, b(9)-98++, b(10)++, b(10), b(10)-98++, b(11)-98++, b(11)++, b(11)-98, b(12)-98++, b(12)++, b(13)-98++

**Matched y ions:** y(1), y(2)++, y(2), y(3), y(4), y(5), y(6)++, y(6), y(7), y(7)++, y(8), y(8)++, y(9), y(9)++, y(10)-98, y(10), y(10)-98++, y(10)++, y(11)-98++, y(11)++, y(12)++, y(12)-98++, y(13)++, y(13)-98++

**Precursor origin neutral loss:** +

## Peptide No.1265

**YPRPASVPPSPSLSR**

**Confirmed sites:** @S:10

**Ambiguous sites:**

MS/MS Fragmentation of **YPRPASVPPSPSLSR**

Found in **GYS1\_MOUSE**, Glycogen [starch] synthase, muscle OS=Mus musculus GN=Gys1 PE=1 SV=2

Match to Query 2965: 1717.856367 from(573.626065,3+)

Title: Elution from: 34.009 to 34.009 scan no 2647 cid35.00 polarity:+MA10:m1s



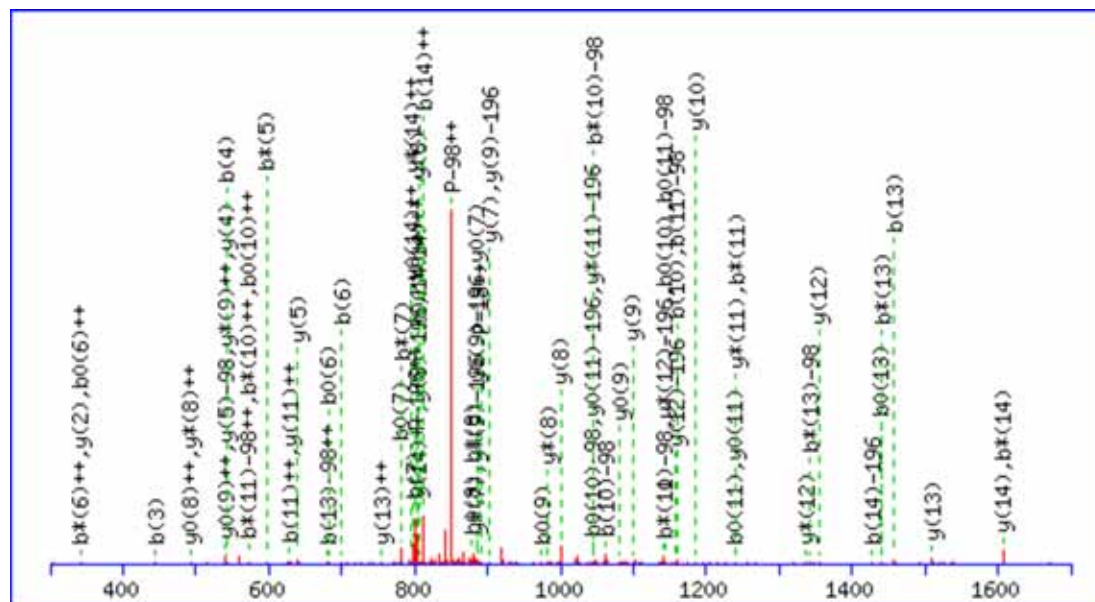

**Monoisotopic mass of neutral peptide Mr(calc):** 1797.8216

**Fixed modifications:** Carbamidomethyl (C) (apply to specified residues or termini only)

**Variable modifications:**

**N-term :** Dimethyl (N-term)

**S10 :** Phospho (ST), with neutral losses 0.0000(shown in table), 97.9769

**S14 :** Phospho (ST), with neutral losses 0.0000(shown in table), 97.9769

**Ions Score:** 31 **Expect:** 0.043

**Matched b ions:** b(3), b(4), b(6), b(7), b(10)-98, b(10), b(11)-98, b(11)++, b(13), b(13)-98, b(14)-196, b(14)-98, b(14)++

**Matched y ions:** y(2), y(4), y(5)-98, y(5), y(6)-98, y(6), y(7)-98, y(7), y(8), y(8)-196, y(8)-98, y(9)-98, y(9)-196, y(9), y(10)-98, y(10), y(11)-98, y(11)++, y(12), y(12)-98, y(12)-196, y(12)-98, y(12)-196, y(13), y(13)++, y(14)-98, y(14), y(14)++, y(14)-98++

**Precursor origin neutral loss:** +

## Peptide No.1267

**YPRPASVPPSPSLSR**

**Confirmed sites:** @Y:1,@S:10

**Ambiguous sites:**

**MS/MS Fragmentation of YPRPASVPPSPSLSR**

Found in **GYS1\_MOUSE**, Glycogen [starch] synthase, muscle OS=Mus musculus GN=Gys1 PE=1 SV=2

Match to Query 2971: 1797.822402 from(600.281410,3+)

Title: Elution from: 41.309 to 41.309 scan no 3533 cid35.00 polarity:+:MA10



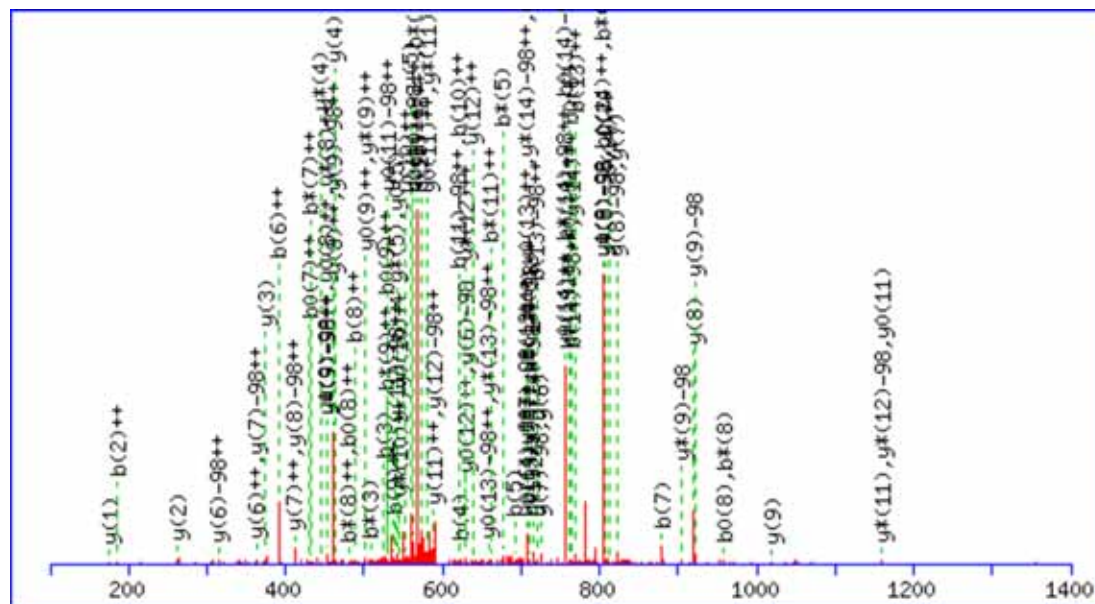

**Monoisotopic mass of neutral peptide Mr(calc):** 1797.8216

**Fixed modifications:** Carbamidomethyl (C) (apply to specified residues or termini only)

**Variable modifications:**

**N-term :** Dimethyl (N-term)

**Y1 :** Phospho (Y)

**S10 :** Phospho (ST), with neutral losses 97.9769(shown in table), 0.0000

**Ions Score:** 38 **Expect:** 0.01

**Matched b ions:** b(2)++, b(3), b(4), b(5), b(6)++, b(7), b(8)++, b(9)++, b(10)-98++, b(10)++, b(11)-98++, b(13)++, b(13)-98++, b(14)-98++, b(14)++

**Matched y ions:** y(1), y(2), y(3), y(4), y(5), y(6)-98++, y(6)++, y(6), y(6)-98, y(7)++, y(7)-98++, y(7)-98, y(7), y(8)++, y(8), y(8)-98++, y(8)-98, y(9)-98++, y(9), y(9)-98, y(10)++, y(11)++, y(11)-98++, y(12)-98++, y(12)++, y(13)++, y(14)-98++, y(14)++

**Precursor origin neutral loss:** +

## Peptide No.1268

**YPRPASVPPSPSLSR**

**Confirmed sites:** @S:6,@S:10

**Ambiguous sites:**

**MS/MS Fragmentation of YPRPASVPPSPSLSR**

Found in **GYS1\_MOUSE**, Glycogen [starch] synthase, muscle OS=Mus musculus GN=Gys1 PE=1 SV=2

Match to Query 3373: 1797.823014 from(600.281614,3+)

Title: Elution from: 34.633 to 34.633 scan no 2733 cid35.00 polarity:+:MA10



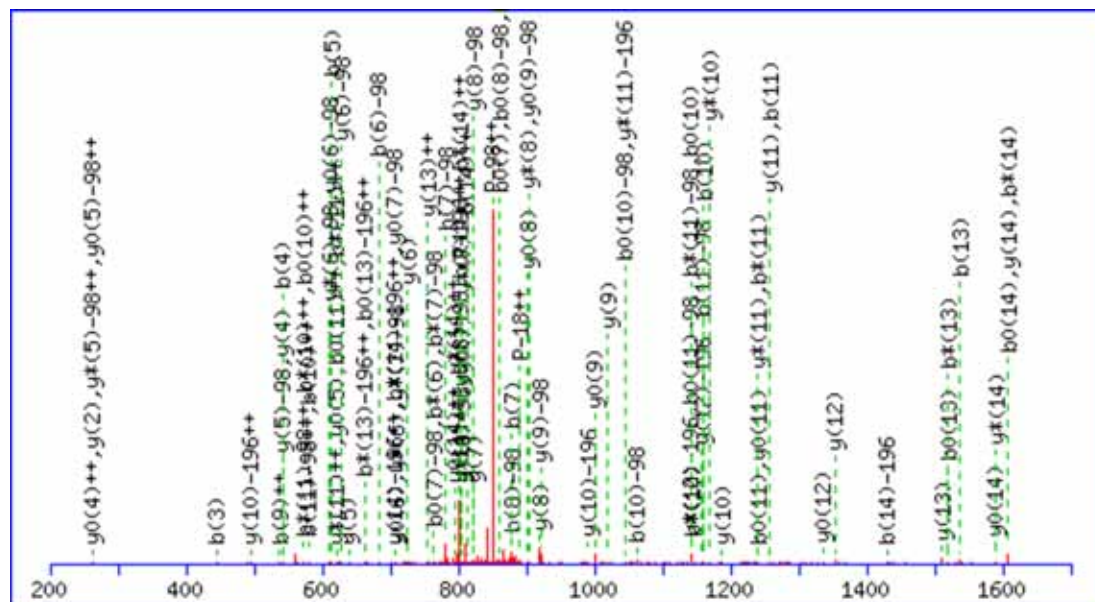

**Monoisotopic mass of neutral peptide Mr(calc): 1797.8216**

**Fixed modifications:** Carbamidomethyl (C) (apply to specified residues or termini only)

**Variable modifications:**

**N-term :** Dimethyl (N-term)

**S6 :** Phospho (ST), with neutral losses 0.0000(shown in table), 97.9769

**S12 :** Phospho (ST), with neutral losses 0.0000(shown in table), 97.9769

**Ions Score:** 63 **Expect:** 2.5e-005

**Matched b ions:** b(3), b(4), b(5), b(6)-98, b(7)-98, b(7), b(8)-98, b(9)++, b(10)-98, b(10)++, b(10), b(11), b(11)-98++, b(11)-98, b(12)-98, b(13)-98, b(13), b(13)-98++, b(14)-196, b(14)-98++, b(14)++

**Matched y ions:** y(2), y(4), y(5)-98, y(5), y(6)-98, y(6), y(7), y(8), y(8)-98, y(9), y(9)-98, y(10), y(10)-196, y(10)-196++, y(10)-98, y(11), y(11)-98++, y(11)-98, y(12), y(12)-98++, y(12)-98, y(12)-196, y(13)++, y(13), y(13)-98++, y(14)-98, y(14), y(14)-98++, y(14)-196++, y(14)++

**Precursor origin neutral loss:** +

## Peptide No.1270

**YPRPASVPPSPSLSR**

**Confirmed sites:** @S:6,@S:14

**Ambiguous sites:**

**MS/MS Fragmentation of YPRPASVPPSPSLSR**

Found in **GYS1\_MOUSE**, Glycogen [starch] synthase, muscle OS=Mus musculus GN=Gys1 PE=1 SV=2

Match to Query 2977: 1797.822690 from(899.918621,2+)

Title: Elution from: 37.051 to 37.051 scan no 2959 cid35.00 polarity:+:MA10:m1s

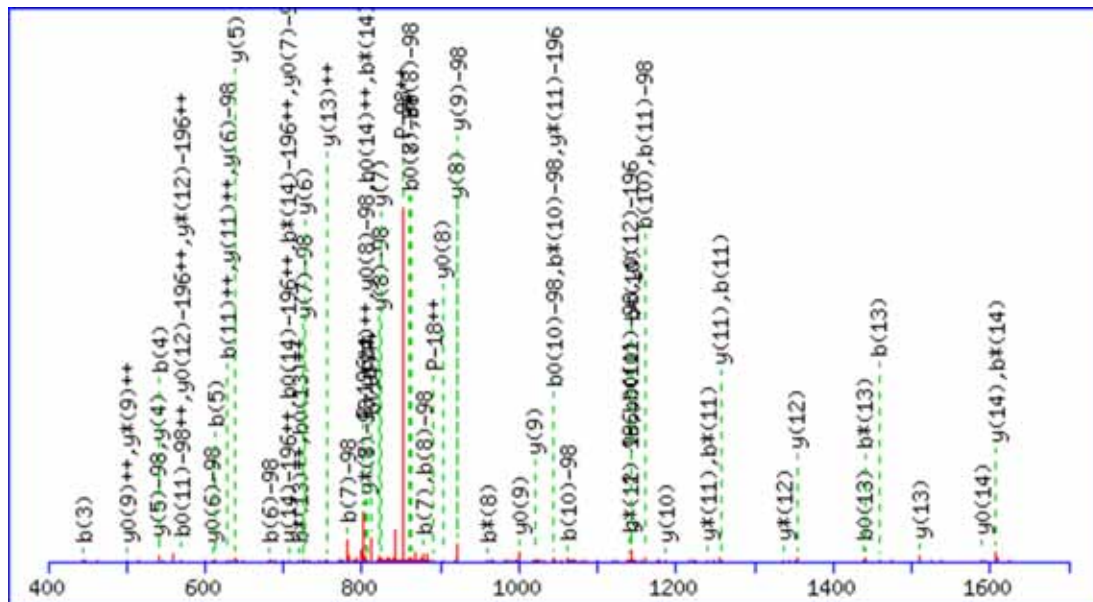

**Monoisotopic mass of neutral peptide Mr(calc):** 1797.8216

**Fixed modifications:** Carbamidomethyl (C) (apply to specified residues or termini only)

**Variable modifications:**

**N-term :** Dimethyl (N-term)

**S6 :** Phospho (ST), with neutral losses 0.0000(shown in table), 97.9769

**S14 :** Phospho (ST), with neutral losses 0.0000(shown in table), 97.9769

**Ions Score:** 45 **Expect:** 0.002

**Matched b ions:** b(3), b(4), b(5), b(6)-98, b(7), b(7)-98, b(8)-98, b(10), b(10)-98, b(11)-98, b(11), b(11)++, b(13), b(14)++

**Matched y ions:** y(4), y(5)-98, y(5), y(6), y(6)-98, y(7)-98, y(7), y(8), y(8)-98, y(9), y(9)-98, y(10), y(11), y(11)++, y(12)-98, y(12), y(12)-98++, y(13), y(13)-98++, y(13)++, y(14)-98, y(14), y(14)-196++, y(14)++

**Precursor origin neutral loss:** +

## Peptide No.1271

**YPRPASVPPSPSLSR**

**Confirmed sites:** @S:10,@S:12

**Ambiguous sites:**

MS/MS Fragmentation of **YPRPASVPPSPSLSR**

Found in **GYS1\_MOUSE**, Glycogen [starch] synthase, muscle OS=Mus musculus GN=Gys1 PE=1 SV=2

Match to Query 3653: 1803.854710 from(902.934631,2+)

Title: Elution from: 34.265 to 34.265 scan no 2685 cid35.00 polarity:+:MA10:m1s



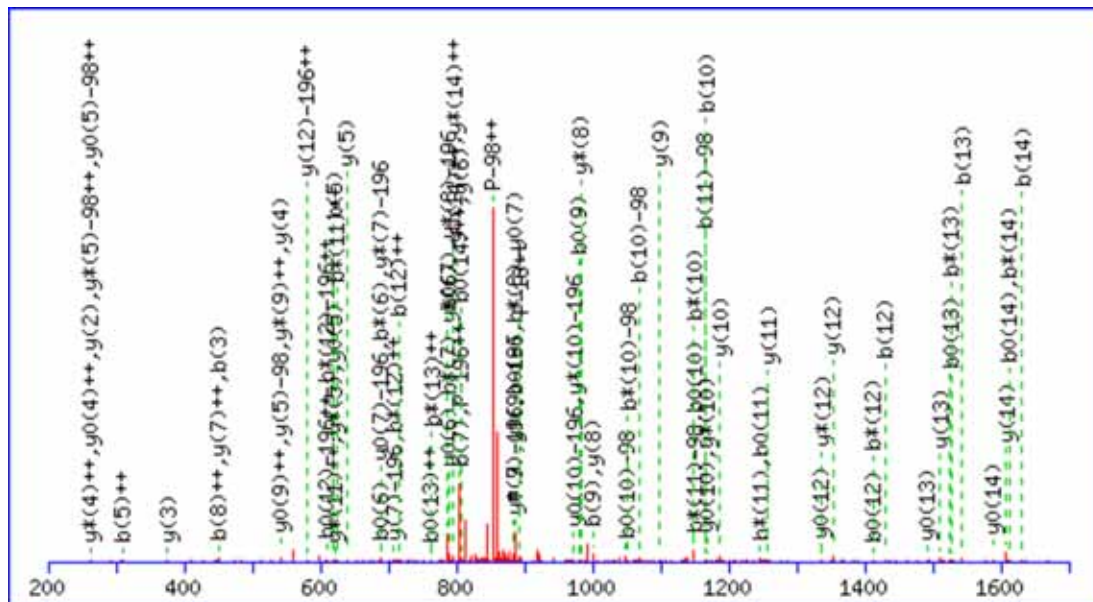

**Monoisotopic mass of neutral peptide Mr(calc): 1803.8534**

**Fixed modifications:** Carbamidomethyl (C) (apply to specified residues or termini only)

**Variable modifications:**

**N-term :** Dimethyl:2H(4)13C(2) (N-term)

**S10 :** Phospho (ST), with neutral losses 0.0000(shown in table), 97.9769

**S12 :** Phospho (ST), with neutral losses 0.0000(shown in table), 97.9769

**Ions Score:** 33 **Expect:** 0.032

**Matched b ions:** b(3), b(5)++, b(5), b(7), b(8)++, b(9), b(10)-98, b(10), b(11)-98, b(12), b(12)++, b(13), b(13)-98, b(14), b(14)-98

**Matched y ions:** y(2), y(3), y(4), y(5)-98, y(5), y(6)-98, y(6), y(7)++, y(7)-98, y(7)-196, y(8)-98, y(8), y(9)-98, y(9), y(10), y(10)-98, y(11)-98, y(11), y(12), y(12)-98, y(12)-196, y(13)-98, y(13), y(14), y(14)-98

**Precursor origin neutral loss:** +

## Peptide No.1272

**YPRPASVPPSPSLSR**

**Confirmed sites:** @S:10,@S:14

**Ambiguous sites:**

**MS/MS Fragmentation of YPRPASVPPSPSLSR**

Found in **GYS1\_MOUSE**, Glycogen [starch] synthase, muscle OS=Mus musculus GN=Gys1 PE=1 SV=2

Match to Query 4997: 1803.854890 from(902.934721,2+)

Title: Elution from: 36.464 to 36.464 scan no 3134 cid35.00 polarity:+:MA10:m1s



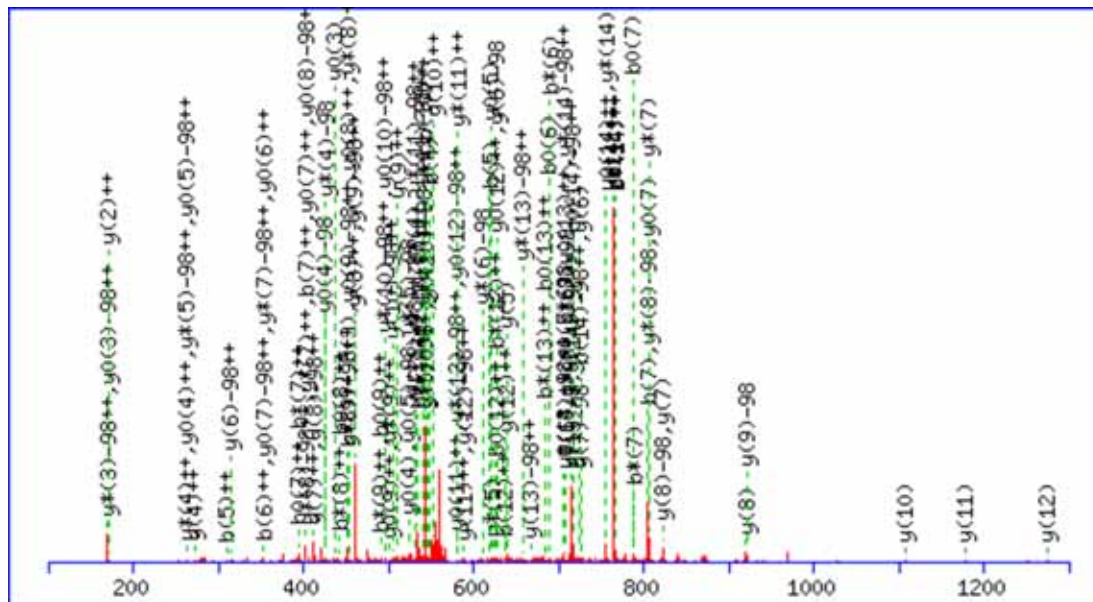

**Monoisotopic mass of neutral peptide Mr(calc):** 1723.8871

**Fixed modifications:** Carbamidomethyl (C) (apply to specified residues or termini only)

**Variable modifications:**

**N-term :** Dimethyl:2H(4)13C(2) (N-term)

**S14 :** Phospho (ST), with neutral losses 0.0000(shown in table), 97.9769

**Ions Score:** 37 **Expect:** 0.012

**Matched b ions:** b(3), b(4), b(5)++, b(5), b(6)++, b(6), b(7), b(7)++, b(8)++, b(10)++, b(12)++, b(14)-98++

**Matched y ions:** y(2)++, y(4), y(4)++, y(5), y(5)-98, y(6)-98++, y(6)-98, y(6), y(7)++, y(7), y(7)-98,

y(8)++, y(8)-98++, y(8), y(8)-98, y(9)-98++, y(9)-98, y(9)++, y(10), y(10)++, y(10)-98++, y(11),

y(11)-98++, y(11)++, y(12), y(12)-98++, y(12)++, y(13)++, y(13)-98++, y(14)++, y(14)-98++

**Precursor origin neutral loss:** +

## Peptide No.1274

**YPRPASVPPSPSLSR**

**Confirmed sites:** @S:6,@S:10

**Ambiguous sites:**

**MS/MS Fragmentation of YPRPASVPPSPSLSR**

Found in **GYS1\_MOUSE**, Glycogen [starch] synthase, muscle OS=Mus musculus GN=Gys1 PE=1 SV=2

Match to Query 3409: 1803.855744 from(902.935148,2+)

Title: Elution from: 35.479 to 35.479 scan no 2840 cid35.00 polarity:+:MA10:m1s





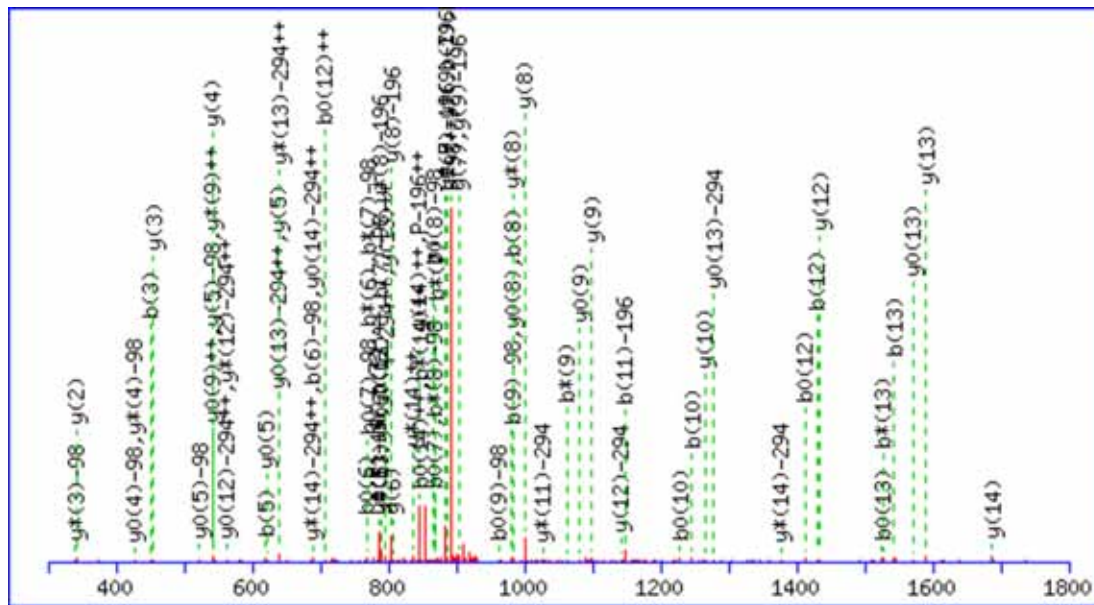

**Monoisotopic mass of neutral peptide Mr(calc):** 1883.8197

**Fixed modifications:** Carbamidomethyl (C) (apply to specified residues or termini only)

**Variable modifications:**

**N-term :** Dimethyl:2H(4)13C(2) (N-term)

**S6 :** Phospho (ST), with neutral losses 0.0000(shown in table), 97.9769

**S10 :** Phospho (ST), with neutral losses 0.0000(shown in table), 97.9769

**S14 :** Phospho (ST), with neutral losses 0.0000(shown in table), 97.9769

**Ions Score:** 36 **Expect:** 0.011

**Matched b ions:** b(3), b(5), b(6)-98, b(6), b(7)-98, b(7), b(8), b(8)-98, b(9)-98, b(10)-98, b(10), b(11)-196, b(12), b(13), b(13)-98++, b(14)-196, b(14)-98, b(14)-98++

**Matched y ions:** y(2), y(3), y(4), y(5), y(5)-98, y(6), y(7)-98, y(7), y(8), y(8)-98++, y(8)-196, y(8)-98, y(9), y(9)-98, y(9)-196, y(10), y(10)-98, y(11)-98++, y(11)-196, y(12)-98, y(12)-196++, y(12), y(12)-294, y(13), y(13)++, y(13)-98++, y(14)-98, y(14), y(14)++, y(14)-98++, y(14)-196, y(14)-196++

**Precursor origin neutral loss:** +

## Peptide No.1276

**YRPASVPPSPSLSR**

**Confirmed sites:** @S:6,@S:12

**Ambiguous sites:**

**MS/MS Fragmentation of YRPASVPPSPSLSR**

Found in **GYS1\_MOUSE**, Glycogen [starch] synthase, muscle OS=Mus musculus GN=Gys1 PE=1 SV=2

Match to Query 3335: 1803.854272 from(902.934412,2+)

Title: Elution from: 35.661 to 35.661 scan no 2862 cid35.00 polarity:+:MA10



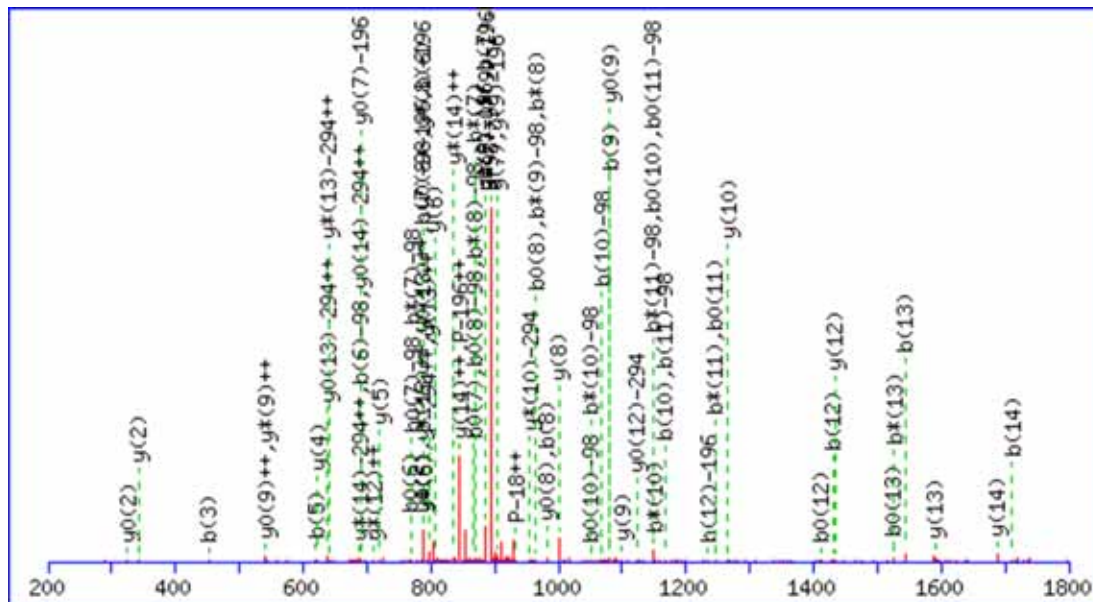

**Monoisotopic mass of neutral peptide Mr(calc):** 1883.8197

**Fixed modifications:** Carbamidomethyl (C) (apply to specified residues or termini only)

**Variable modifications:**

**N-term :** Dimethyl:2H(4)13C(2) (N-term)

**S6 :** Phospho (ST), with neutral losses 0.0000(shown in table), 97.9769

**S12 :** Phospho (ST), with neutral losses 0.0000(shown in table), 97.9769

**S14 :** Phospho (ST), with neutral losses 0.0000(shown in table), 97.9769

**Ions Score:** 31 **Expect:** 0.032

**Matched b ions:** b(3), b(5), b(6)-98, b(6), b(7)-98, b(7), b(8)-98, b(8), b(9), b(10), b(10)-98, b(11)-98, b(12)-196, b(12), b(13)-98, b(13), b(14)-98, b(14), b(14)-98++

**Matched y ions:** y(2), y(4), y(5)-98, y(5), y(6), y(7)-98, y(7), y(8)-98, y(8)-98, y(9)-98, y(9)-196, y(9), y(10)-196, y(10)-98, y(10), y(11)-98, y(11)-98, y(12)-98, y(12), y(12)-196, y(13), y(13)-98, y(13)++, y(14)++, y(14), y(14)-98, y(14)-98++

**Precursor origin neutral loss:** +

## Peptide No.1278

**YSTEPKTYIDTMEKK**

**Confirmed sites: @T:7**

**Ambiguous sites:**

**MS/MS Fragmentation of YSTEPKTYIDTMEKK**

Found in **ZN654\_MOUSE**, Zinc finger protein 654 OS=Mus musculus GN=Znf654 PE=1 SV=2

Match to Query 4678: 1968.910184 from(493.234822,4+)

Title: Elution from: 27.227 to 27.227 scan no 1745 cid35.00 polarity:+:MA10

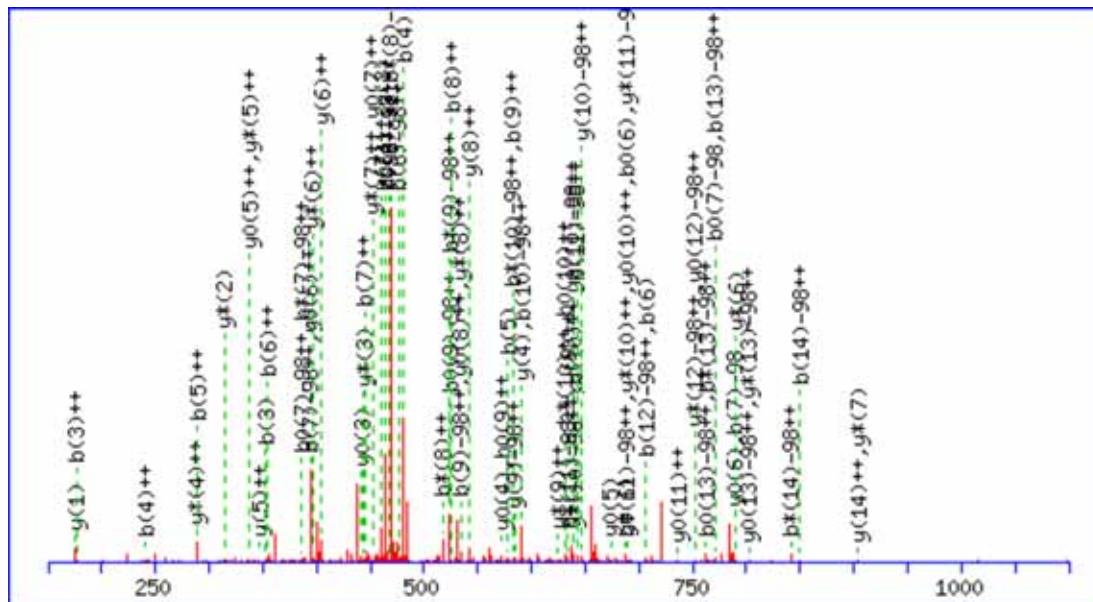

**Monoisotopic mass of neutral peptide Mr(calc):** 1968.9155

**Fixed modifications:** Carbamidomethyl (C) (apply to specified residues or termini only)

**Variable modifications:**

T7 : Phospho (ST), with neutral losses 97.9769(shown in table), 0.0000

K14 : Dimethyl (K)

K15 : Dimethyl (K)

**Ions Score:** 34 **Expect:** 0.025

**Matched b ions:** b(3)++, b(3), b(4), b(4)++, b(5)++, b(5), b(6)++, b(6), b(7)-98++, b(7)-98, b(7)++, b(8)-98++, b(8)++, b(9)-98++, b(9)++, b(10)-98++, b(10)++, b(11)-98++, b(12)-98++, b(13)-98++, b(14)-98++

**Matched y ions:** y(1), y(3), y(4), y(5)++, y(6)++, y(7)++, y(8)++, y(9)-98++, y(9)++, y(10)-98++, y(14)++

**Precursor origin neutral loss:** +

## Peptide No.1279

**YTDQSGEEEEEDYESEEQLQHR**

**Confirmed sites:** @S:5

**Ambiguous sites:**

MS/MS Fragmentation of **YTDQSGEEEEEDYESEEQLQHR**

Found in **COQ9\_MOUSE**, Ubiquinone biosynthesis protein COQ9, mitochondrial OS=Mus musculus  
GN=Coq9 PE=1 SV=1

Match to Query 7238: 2708.039709 from(903.687179,3+)

Title: Elution from: 36.331 to 36.331 scan no 3003 cid35.00 polarity:+:MA10:m1s



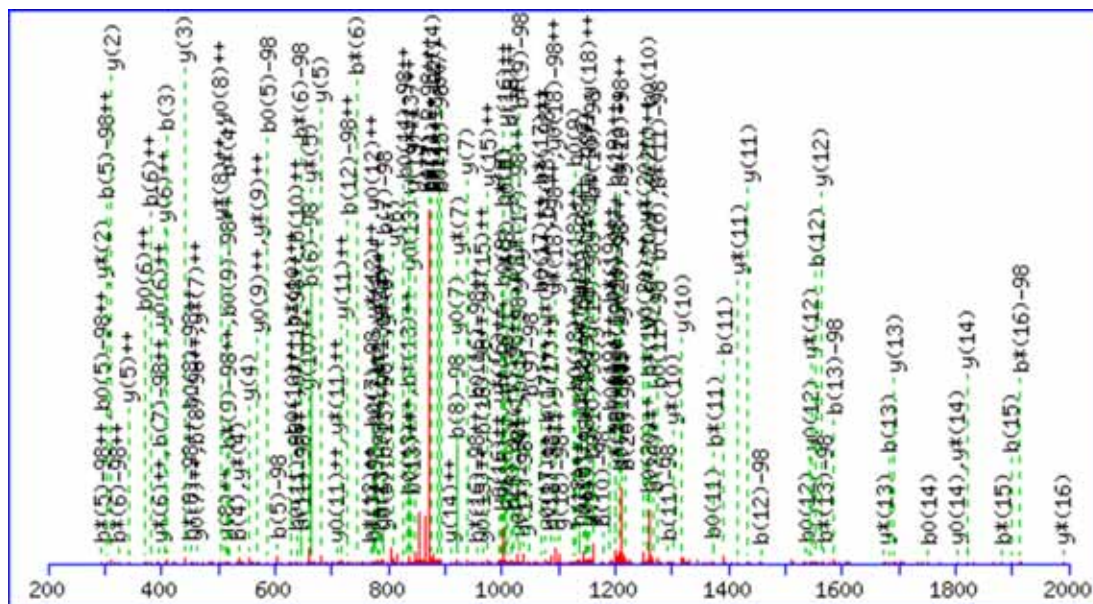

**Monoisotopic mass of neutral peptide Mr(calc): 2708.0399**

**Fixed modifications:** Carbamidomethyl (C) (apply to specified residues or termini only)

**Variable modifications:**

**N-term :** Dimethyl (N-term)

**S5 :** Phospho (ST), with neutral losses 97.9769(shown in table), 0.0000

**Ions Score:** 81 **Expect:** 2.4e-007

**Matched b ions:** b(3), b(4), b(5)-98++, b(5)-98, b(6)-98, b(6)++, b(7)-98++, b(7)-98, b(7), b(8)-98, b(8)-98++, b(8), b(9)-98, b(9), b(10)++, b(10)-98, b(10), b(11), b(11)-98++, b(11)-98, b(12)-98, b(12), b(12)-98++, b(12)++, b(13)-98, b(13), b(13)-98++, b(13)++, b(14)++, b(15), b(16)-98++, b(16)++, b(17)-98++, b(17)++, b(18)-98++, b(18)++, b(19)-98++, b(19)++, b(20)-98++, b(20)++

**Matched y ions:** y(2), y(3), y(4), y(5), y(5)++, y(6)++, y(6), y(7), y(8)++, y(8), y(9), y(10)++, y(10), y(11)++, y(11), y(12)++, y(12), y(13), y(13)++, y(14), y(14)++, y(15)++, y(16)++, y(17)-98++, y(17)++, y(18)-98++, y(18)++, y(19)-98++, y(19)++, y(20)-98++, y(20)++

**Precursor origin neutral loss:** +

## Peptide No.1280

**YTDQSGEEEEEDYESEEQLQHR**

**Confirmed sites: @S:5**

**Ambiguous sites:**

MS/MS Fragmentation of **YTDQSGEEEEEDYESEEQLQHR**

Found in **COQ9\_MOUSE**, Ubiquinone biosynthesis protein COQ9, mitochondrial OS=Mus musculus  
GN=Coq9 PE=1 SV=1

Match to Query 8556: 2714.072940 from(905.698256,3+)

Title: Elution from: 36.271 to 36.271 scan no 3106 cid35.00 polarity:+:MA10:m1s
